# Supplementary material
Source: publisher figshare collection journal article supplement (https://gsapubs.figshare.com/ndownloader/files/22411833)
Supplement: Supplementary file 1 [file 22411833]

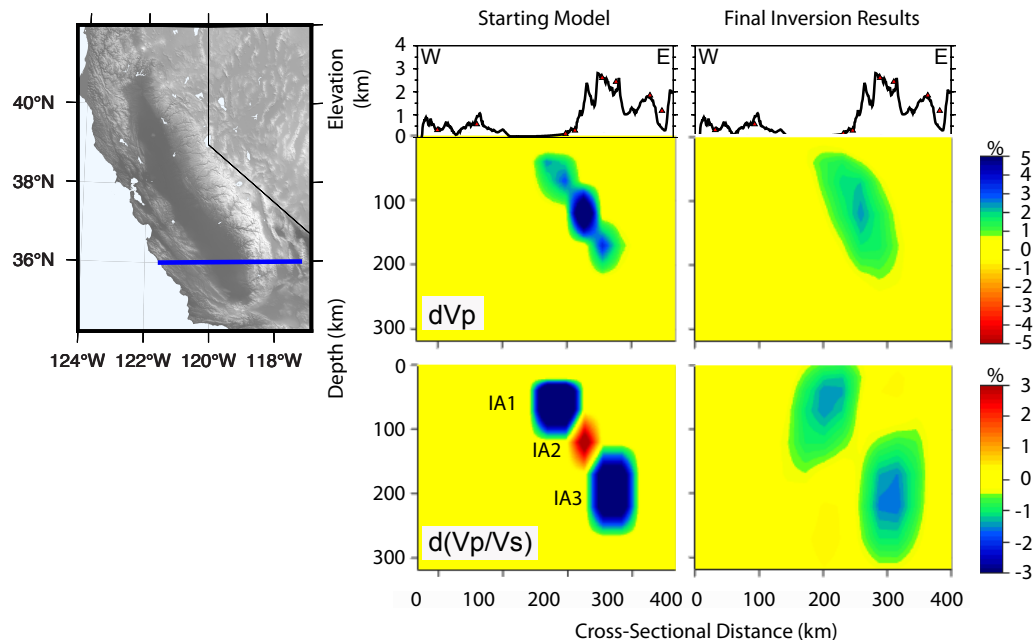

Figure S2. Synthetic test for starting model with varying  $V_p$  and  $V_p/V_s$ . IA1 was assigned a  $dV_p$  of 3% and  $d(V_p/V_s)$  of -5.5%. IA2 was assigned a  $dV_p$  of 9% and a  $d(V_p/V_s)$  of 4%. IA3 was assigned a  $dV_p$  of 4% and a  $d(V_p/V_s)$  of -4%. Recovery of  $dV_p$  magnitude was as high as ~60% with vertically integrated recovery of ~36%. Recovery of  $d(V_p/V_s)$  magnitude was as high as 50% with an vertically integrated recovery of ~50%.
