# Supplementary material
Source: publisher figshare collection journal article supplement (https://gsapubs.figshare.com/ndownloader/files/22411833)
Supplement: Supplementary file 2 [file 22411833]

,,,Event,,,,,,

Station,Date,Origin Time,Latitude,Longitude,Depth (km),Magnitude,Fast axis  
(degrees),FA error (degrees),Split time (s),Split time error (s)

CCC,1997/09/04,20:52:58,-3.482,151.39,365.6,5.7,72,3.25,1.08,0.12  
LMC,1997/09/04,20:52:58,-3.482,151.39,365.6,5.7,67,4.5,0.72,0.14  
ARC2,1997/8/13,4:45:04,25.03,125.77,55.3,6.2,94,11.5,1.26,0.2  
BGR,1997/8/13,4:45:04,25.03,125.77,55.3,6.2,87,8,1.11,0.14  
BPC,1997/8/13,4:45:04,25.03,125.77,55.3,6.2,79,1.5,1.68,0.03  
BRR,1997/8/13,4:45:04,25.03,125.77,55.3,6.2,79,7.75,0.9,0.06  
CPR,1997/8/13,4:45:04,25.03,125.77,55.3,6.2,78,2,1.92,0.05  
DP00,1997/8/13,4:45:04,25.03,125.77,55.3,6.2,105,5.75,1.23,0.2  
FLL,1997/8/13,4:45:04,25.03,125.77,55.3,6.2,86,5.25,1.05,0.05  
HVV,1997/8/13,4:45:04,25.03,125.77,55.3,6.2,82,4.75,1.17,0.05  
JUN,1997/8/13,4:45:04,25.03,125.77,55.3,6.2,83,6.5,1.47,0.11  
LMC,1997/8/13,4:45:04,25.03,125.77,55.3,6.2,93,5.25,0.99,0.09  
OVY,1997/8/13,4:45:04,25.03,125.77,55.3,6.2,91,4,1.74,0.06  
PDC,1997/8/13,4:45:04,25.03,125.77,55.3,6.2,112,3.75,1.53,0.16  
SFT,1997/8/13,4:45:04,25.03,125.77,55.3,6.2,99,3.75,1.08,0.05  
SLC,1997/8/13,4:45:04,25.03,125.77,55.3,6.2,116,6,1.56,0.11  
SMD,1997/8/13,4:45:04,25.03,125.77,55.3,6.2,83,7.25,1.56,0.12  
TWR2,1997/8/13,4:45:04,25.03,125.77,55.3,6.2,79,11.25,1.11,0.2  
WHP,1997/8/13,4:45:04,25.03,125.77,55.3,6.2,90,4,1.8,0.08  
BPC,1997/9/4,4:23:37,-26.569,178.336,624.7,6.8,66,3,2.22,0.26  
BRR,1997/9/4,4:23:37,-26.569,178.336,624.7,6.8,91,5.5,0.93,0.08  
DP00,1997/9/4,4:23:37,-26.569,178.336,624.7,6.8,130,8.25,0.69,0.14  
JUN,1997/9/4,4:23:37,-26.569,178.336,624.7,6.8,78,3,1.8,0.29  
SFT,1997/9/4,4:23:37,-26.569,178.336,624.7,6.8,113,7.5,0.84,0.11  
SLC,1997/9/4,4:23:37,-26.569,178.336,624.7,6.8,141,4.75,0.81,0.11  
SMD,1997/9/4,4:23:37,-26.569,178.336,624.7,6.8,67,3.5,1.32,0.2  
SRF,1997/9/4,4:23:37,-26.569,178.336,624.7,6.8,83,4.5,1.38,0.15  
WHP,1997/9/4,4:23:37,-26.569,178.336,624.7,6.8,91,7.25,0.9,0.13  
LAVA,2005/02/05,12:23:18,5.293,123.34,525,7.1,88,7.25,1.23,0.19  
R04C,2005/02/05,12:23:18,5.293,123.34,525,7.1,90,3,1.65,0.11  
S04C,2005/02/05,12:23:18,5.293,123.34,525,7.1,99,4.5,2.33,0.31  
T06C,2005/02/05,12:23:18,5.293,123.34,525,7.1,88,4,1.7,0.14  
HELL,2005/03/02,10:42:12,-6.527,129.933,201.7,7.1,80,1.25,1.38,0.04  
T06C,2005/03/02,10:42:12,-6.527,129.933,201.7,7.1,76,2.25,1.65,0.14  
SN25,2005/08/04,9:26:52,-3.657,140.17,40.00,5.8,85,4.5,1.68,0.18  
SN36,2005/08/04,9:26:52,-3.657,140.17,40.00,5.8,37,-4.25,1.38,0.11  
SN63,2005/08/04,9:26:52,-3.657,140.17,40.00,5.8,80,1.25,1.2,0.06  
O05C,2005/08/08,8:33:56,-3.795,140.156,10.00,5.9,65,1,1.83,0.03  
R05C,2005/09/06,1:16:02,24.084,122.19,32.00,5.8,61,3,1.15,0.04  
SN11,2005/09/06,1:16:02,24.084,122.19,32.00,5.8,65,9.75,0.98,0.1  
SN22,2005/09/06,1:16:02,24.084,122.19,32.00,5.8,90,2,1.2,0.03  
SN37,2005/09/06,1:16:02,24.084,122.19,32.00,5.8,76,10.25,1.13,0.14  
SN86,2005/09/06,1:16:02,24.084,122.19,32.00,5.8,86,2.75,1.43,0.03  
BNLO,2005/10/08,3:50:40,34.539,73.59,26.00,7.6,111,7.5,1.1,0.11  
P01C,2005/10/08,3:50:40,34.539,73.59,26.00,7.6,152,3.5,1.1,0.16  
S05C,2005/10/15,15:51:08,25.321,123.35,192,6.4,98,5.75,1.78,0.07  
S08C,2005/10/15,15:51:08,25.321,123.35,192,6.4,74,4.75,1.4,0.08  
SN11,2005/10/15,15:51:08,25.321,123.35,192,6.4,77,11.25,1,0.15  
SN15,2005/10/15,15:51:08,25.321,123.35,192,6.4,75,6.25,1.65,0.19  
SN16,2005/10/15,15:51:08,25.321,123.35,192,6.4,71,5.5,1.38,0.19

**Disclaimer: This is a confidential document and must not be discussed with others, forward in any form, or posted on websites without the express written consent of the Geological Society of America.**

SN21,2005/10/15,15:51:08,25.321,123.35,192,6.4,79,4,1.25,0.06  
 SN22,2005/10/15,15:51:08,25.321,123.35,192,6.4,89,4,1.48,0.08  
 SN27,2005/10/15,15:51:08,25.321,123.35,192,6.4,68,4.25,1.65,0.09  
 SN34,2005/10/15,15:51:08,25.321,123.35,192,6.4,69,9,1.1,0.15  
 SN37,2005/10/15,15:51:08,25.321,123.35,192,6.4,72,3,0.9,0.03  
 SN43,2005/10/15,15:51:08,25.321,123.35,192,6.4,90,8.5,1.08,0.14  
 SN45,2005/10/15,15:51:08,25.321,123.35,192,6.4,61,5.25,1.45,0.18  
 SN47,2005/10/15,15:51:08,25.321,123.35,192,6.4,71,3.5,1.33,0.07  
 SN48,2005/10/15,15:51:08,25.321,123.35,192,6.4,58,4.75,1.3,0.19  
 SN51,2005/10/15,15:51:08,25.321,123.35,192,6.4,85,5,1.5,0.09  
 SN53,2005/10/15,15:51:08,25.321,123.35,192,6.4,77,3.5,1.65,0.06  
 SN56,2005/10/15,15:51:08,25.321,123.35,192,6.4,74,7,1.35,0.2  
 SN57,2005/10/15,15:51:08,25.321,123.35,192,6.4,74,2,1.6,0.04  
 SN62,2005/10/15,15:51:08,25.321,123.35,192,6.4,91,1.5,1.53,0.02  
 SN64,2005/10/15,15:51:08,25.321,123.35,192,6.4,85,9.75,1.35,0.19  
 SN67,2005/10/15,15:51:08,25.321,123.35,192,6.4,63,3.25,1.85,0.1  
 SN75,2005/10/15,15:51:08,25.321,123.35,192,6.4,80,8,1.95,0.15  
 SN76,2005/10/15,15:51:08,25.321,123.35,192,6.4,61,3,1.98,0.12  
 SN84,2005/10/15,15:51:08,25.321,123.35,192,6.4,91,2.25,1.35,0.03  
 SN86,2005/10/15,15:51:08,25.321,123.35,192,6.4,87,6.25,1.58,0.11  
 SN95,2005/10/15,15:51:08,25.321,123.35,192,6.4,96,10.25,1.38,0.21  
 T06C,2005/10/15,15:51:08,25.321,123.35,192,6.4,95,3,1.73,0.05  
 HELL,2005/10/15,15:51:08,25.321,123.35,192,6.4,87,5,1.2,0.08  
 N02C,2005/10/15,15:51:08,25.321,123.35,192,6.4,77,5.5,0.88,0.06  
 R05C,2005/10/15,15:51:08,25.321,123.35,192,6.4,65,3,1.18,0.04  
 R06C,2005/10/15,15:51:08,25.321,123.35,192,6.4,87,2.5,1.63,0.04  
 SN21,2005/11/21,15:36:30,31.019,129.99,145,6.1,82,1.25,1.63,0.02  
 SN25,2005/11/21,15:36:30,31.019,129.99,145,6.1,84,5.5,1.3,0.09  
 SN37,2005/11/21,15:36:30,31.019,129.99,145,6.1,73,8,1,0.09  
 SN51,2005/11/21,15:36:30,31.019,129.99,145,6.1,78,10,1.73,0.19  
 R04C,2005/5/16,3:54:14,-32.589,-179.353,34,6.6,78,4.75,1.95,0.13  
 S05C,2005/5/16,3:54:14,-32.589,-179.353,34,6.6,98,8.5,1.18,0.14  
 T06C,2005/5/16,3:54:14,-32.589,-179.353,34,6.6,84,13,1.43,0.22  
 SN48,2005/7/23,8:51:43,-30.254,-178.068,10,6,87,2.75,1.45,0.05  
 SN73,2005/8/11,9:08:46,-22.677,169.509,10,6.2,78,1.25,1.2,0.05  
 U04C,2005/8/11,9:08:46,-22.677,169.509,10,6.2,85,4.5,1.5,0.13  
 M03C,2006/02/18,15:59:02,-5.193,152.05,44.2,6.2,67,3.5,1.65,0.14  
 M04C,2006/02/18,15:59:02,-5.193,152.05,44.2,6.2,29,4.75,1.98,0.11  
 M05C,2006/02/18,15:59:02,-5.193,152.05,44.2,6.2,22,7.25,1.33,0.14  
 O02C,2006/02/18,15:59:02,-5.193,152.05,44.2,6.2,84,5,2.03,0.19  
 SN48,2006/02/18,15:59:02,-5.193,152.05,44.2,6.2,56,5,1.4,0.13  
 SN25,2006/03/14,6:57:33,-3.595,127.21,30.1,6.7,63,5.25,1.45,0.12  
 SN36,2006/03/14,6:57:33,-3.595,127.21,30.1,6.7,39,2.75,1.18,0.08  
 SN44,2006/03/14,6:57:33,-3.595,127.21,30.1,6.7,86,5.75,1.33,0.22  
 ELFS,2006/03/31,21:14:45,3.798,126.344,37,6.2,69,3.25,1.43,0.08  
 R05C,2006/03/31,21:14:45,3.798,126.344,37,6.2,45,8,1.55,0.14  
 M06C,2006/05/16,10:39:23,-31.81,-179.307,152,7.4,68,1.75,1.73,0.09  
 M07A,2006/05/16,10:39:23,-31.81,-179.307,152,7.4,84,0.75,1.65,0.02  
 N08A,2006/05/16,10:39:23,-31.81,-179.307,152,7.4,90,5.5,1.28,0.08  
 O04C,2006/05/16,10:39:23,-31.81,-179.307,152,7.4,53,1,1.1,0.03  
 O08A,2006/05/16,10:39:23,-31.81,-179.307,152,7.4,72,5.25,0.95,0.08  
 O09A,2006/05/16,10:39:23,-31.81,-179.307,152,7.4,90,5,1.08,0.09  
 P05C,2006/05/16,10:39:23,-31.81,-179.307,152,7.4,69,1,1.55,0.05  
 S06C,2006/05/16,10:39:23,-31.81,-179.307,152,7.4,84,2.25,1.33,0.05

SN14,2006/05/16,10:39:23,-31.81,-179.307,152,7.4,71,5.25,1.3,0.16  
SN15,2006/05/16,10:39:23,-31.81,-179.307,152,7.4,71,8.75,1.25,0.02  
SN26,2006/05/16,10:39:23,-31.81,-179.307,152,7.4,61,1.5,1.8,0.16  
SN28,2006/05/16,10:39:23,-31.81,-179.307,152,7.4,78,2.75,1.15,0.07  
SN44,2006/05/16,10:39:23,-31.81,-179.307,152,7.4,91,7.5,1,0.08  
SN46,2006/05/16,10:39:23,-31.81,-179.307,152,7.4,81,2.5,1.78,0.08  
SN52,2006/05/16,10:39:23,-31.81,-179.307,152,7.4,101,2.75,1,0.04  
SN53,2006/05/16,10:39:23,-31.81,-179.307,152,7.4,88,1.25,1.15,0.01  
SN54,2006/05/16,10:39:23,-31.81,-179.307,152,7.4,77,4.25,1.2,0.13  
SN62,2006/05/16,10:39:23,-31.81,-179.307,152,7.4,98,3.5,0.95,0.03  
SN71,2006/05/16,10:39:23,-31.81,-179.307,152,7.4,101,3.5,1.08,0.06  
SN73,2006/05/16,10:39:23,-31.81,-179.307,152,7.4,82,1.5,1.1,0.02  
SN74,2006/05/16,10:39:23,-31.81,-179.307,152,7.4,84,1.5,1.48,0.05  
SN84,2006/05/16,10:39:23,-31.81,-179.307,152,7.4,84,1.5,1.35,0.03  
SN85,2006/05/16,10:39:23,-31.81,-179.307,152,7.4,80,1.5,1.33,0.03  
T06C,2006/05/16,10:39:23,-31.81,-179.307,152,7.4,94,1.75,1.2,0.03  
O04C,2006/05/28,3:12:08,-5.724,151.13,34,6.5,48,7,0.83,0.1  
M02C,2006/06/24,21:15:00,-0.39,123.195,26,6.3,63,7,1.25,0.11  
M07A,2006/06/24,21:15:00,-0.39,123.195,26,6.3,102,6.75,1.8,0.16  
SN14,2006/06/24,21:15:00,-0.39,123.195,26,6.3,92,2,1.25,0.04  
SN24,2006/06/24,21:15:00,-0.39,123.195,26,6.3,63,2.75,1.65,0.04  
O09A,2006/08/07,22:18:55,-15.798,167.789,150,6.8,86,2.25,1.43,0.21  
SN84,2006/08/07,22:18:55,-15.798,167.789,150,6.8,82,1,1.15,0.04  
SN93,2006/08/07,22:18:55,-15.798,167.789,150,6.8,80,4,1.85,0.21  
N06A,2006/09/05,4:53:02,7.678,126.43,135.2,5.8,77,4.5,1.83,0.08  
O04C,2006/09/05,4:53:02,7.678,126.43,135.2,5.8,90,5.75,1.68,0.06  
SNB5,2006/09/05,4:53:02,7.678,126.43,135.2,5.8,77,3.5,1.4,0.04  
HATC,2006/09/16,9:45:23,-3.08,129.44,17,6.3,64,9.75,1.1,0.13  
HELL,2006/09/16,9:45:23,-3.08,129.44,17,6.3,80,4.5,0.9,0.13  
M03C,2006/09/16,9:45:23,-3.08,129.44,17,6.3,81,2.5,1.63,0.09  
M05C,2006/09/16,9:45:23,-3.08,129.44,17,6.3,82,4.23,1.43,0.14  
M06C,2006/09/16,9:45:23,-3.08,129.44,17,6.3,73,2.5,1.78,0.06  
M07A,2006/09/16,9:45:23,-3.08,129.44,17,6.3,99,6,2.3,0.15  
N06A,2006/09/16,9:45:23,-3.08,129.44,17,6.3,80,3,1.8,0.08  
N07B,2006/09/16,9:45:23,-3.08,129.44,17,6.3,90,1.5,2.08,0.08  
N08A,2006/09/16,9:45:23,-3.08,129.44,17,6.3,85,3,1.55,0.17  
O04C,2006/09/16,9:45:23,-3.08,129.44,17,6.3,64,5.75,1.48,0.13  
O05C,2006/09/16,9:45:23,-3.08,129.44,17,6.3,86,2.75,2.1,0.22  
O07A,2006/09/16,9:45:23,-3.08,129.44,17,6.3,81,6.5,1.03,0.13  
P06A,2006/09/16,9:45:23,-3.08,129.44,17,6.3,86,4,0.85,0.08  
R05C,2006/09/16,9:45:23,-3.08,129.44,17,6.3,59,7.25,1.13,0.07  
R07C,2006/09/16,9:45:23,-3.08,129.44,17,6.3,48,8,1.28,0.18  
S06C,2006/09/16,9:45:23,-3.08,129.44,17,6.3,92,5,1.3,0.18  
SN43,2006/09/16,9:45:23,-3.08,129.44,17,6.3,76,0.5,1.08,0.01  
SN55,2006/09/16,9:45:23,-3.08,129.44,17,6.3,55,5.5,1.25,0.07  
SN96,2006/09/16,9:45:23,-3.08,129.44,17,6.3,90,5,1.68,0.16  
T06C,2006/09/16,9:45:23,-3.08,129.44,17,6.3,85,1.25,1.95,0.07  
ELFS,2006/10/17,1:25:12,-5.881,150.98,32,6.7,69,2.75,1.63,0.13  
U11A,2006/10/17,1:25:12,-5.881,150.98,32,6.7,60,5.75,0.63,0.06  
U11A,2006/10/17,1:25:12,-5.881,150.98,32,6.7,60,5.75,0.63,0.06  
V11A,2006/10/17,1:25:12,-5.881,150.98,32,6.7,78,1,1.38,0.07  
V11A,2006/10/17,1:25:12,-5.881,150.98,32,6.7,78,1,1.38,0.07  
SNB3,2006/12/1,3:58:21,3.39,99.079,204,6.3,72,9.25,0.93,0.14  
O02C,2006/9/17,9:34:13,-31.745,-67.176,137,6.2,176,3,1.53,0.04

ELFS,2007/04/21,7:12:48,-3.548,151.266,407.4,6.1,84,3,1.38,0.03  
L12A,2007/04/21,7:12:48,-3.548,151.266,407.4,6.1,151,3.75,1.1,0.04  
M02C,2007/04/21,7:12:48,-3.548,151.266,407.4,6.1,59,1,1.43,0.04  
O04C,2007/04/21,7:12:48,-3.548,151.266,407.4,6.1,55,2.75,1.13,0.03  
O10A,2007/04/21,7:12:48,-3.548,151.266,407.4,6.1,91,7.25,1.15,0.21  
Q07A,2007/04/21,7:12:48,-3.548,151.266,407.4,6.1,65,8.75,0.7,0.11  
Q08A,2007/04/21,7:12:48,-3.548,151.266,407.4,6.1,50,3,0.8,0.03  
R12A,2007/04/21,7:12:48,-3.548,151.266,407.4,6.1,51,15.75,0.45,0.12  
S12A,2007/04/21,7:12:48,-3.548,151.266,407.4,6.1,73,6.75,1.13,0.11  
SN55,2007/04/21,7:12:48,-3.548,151.266,407.4,6.1,65,8.25,1.05,0.15  
SNB6,2007/04/21,7:12:48,-3.548,151.266,407.4,6.1,76,2,1.48,0.04  
U11A,2007/04/21,7:12:48,-3.548,151.266,407.4,6.1,68,6,0.8,0.08  
K11A,2007/05/17,19:29:10,-30.658,-178.202,40.7,6,100,4.75,1.33,0.06  
L08A,2007/05/17,19:29:10,-30.658,-178.202,40.7,6,80,3.25,2.25,0.09  
L10A,2007/05/17,19:29:10,-30.658,-178.202,40.7,6,90,5,1.55,0.09  
L12A,2007/05/17,19:29:10,-30.658,-178.202,40.7,6,84,4.5,1.43,0.08  
M09A,2007/05/17,19:29:10,-30.658,-178.202,40.7,6,87,5.25,1.83,0.09  
N09A,2007/05/17,19:29:10,-30.658,-178.202,40.7,6,83,9,1.25,0.11  
O07A,2007/05/17,19:29:10,-30.658,-178.202,40.7,6,91,5.5,1.05,0.05  
O09A,2007/05/17,19:29:10,-30.658,-178.202,40.7,6,78,5.75,1.13,0.11  
R04C,2007/05/17,19:29:10,-30.658,-178.202,40.7,6,84,2.5,2,0.06  
SN93,2007/05/17,19:29:10,-30.658,-178.202,40.7,6,83,6,2,0.16  
SNA3,2007/05/17,19:29:10,-30.658,-178.202,40.7,6,84,9,1.53,0.17  
SNB3,2007/05/17,19:29:10,-30.658,-178.202,40.7,6,74,3.75,2.08,0.13  
T11A,2007/05/17,19:29:10,-30.658,-178.202,40.7,6,66,4.75,0.93,0.16  
K07A,2007/05/17,19:29:10,-30.658,-178.202,40.7,6,80,3.5,2.3,0.09  
K09A,2007/05/17,19:29:10,-30.658,-178.202,40.7,6,68,6.25,2.38,0.16  
K10A,2007/05/17,19:29:10,-30.658,-178.202,40.7,6,102,2.25,2.23,0.05  
O11A,2007/05/29,1:03:27,-4.587,151.841,132.5,6.1,155,4.75,0.98,0.14  
R05C,2007/05/29,1:03:27,-4.587,151.841,132.5,6.1,61,3.5,1.68,0.14  
R07C,2007/05/29,1:03:27,-4.587,151.841,132.5,6.1,68,3.75,1.5,0.09  
R12A,2007/05/29,1:03:27,-4.587,151.841,132.5,6.1,50,8,0.53,0.04  
S11A,2007/05/29,1:03:27,-4.587,151.841,132.5,6.1,93,9.75,1.1,0.18  
S12A,2007/05/29,1:03:27,-4.587,151.841,132.5,6.1,54,1.75,1.05,0.25  
SN64,2007/05/29,1:03:27,-4.587,151.841,132.5,6.1,74,3.25,1.63,0.14  
SN97,2007/05/29,1:03:27,-4.587,151.841,132.5,6.1,66,2.75,1.23,0.07  
U11A,2007/05/29,1:03:27,-4.587,151.841,132.5,6.1,66,3.25,0.78,0.04  
V11A,2007/05/29,1:03:27,-4.587,151.841,132.5,6.1,73,1.75,1.33,0.09  
L04A,2007/05/29,1:03:27,-4.587,151.841,132.5,6.1,56,3,1.55,0.07  
M02C,2007/05/29,1:03:27,-4.587,151.841,132.5,6.1,68,2,1.45,0.06  
M03C,2007/05/29,1:03:27,-4.587,151.841,132.5,6.1,68,2,1.45,0.06  
M10A,2007/05/29,1:03:27,-4.587,151.841,132.5,6.1,120,11.5,1,0.13  
O06A,2007/05/29,1:03:27,-4.587,151.841,132.5,6.1,87,1.5,1.78,0.12  
O11A,2007/05/29,1:03:27,-4.587,151.841,132.5,6.1,155,4.75,0.98,0.14  
K11A,2007/06/14,17:41:04,-5.649,151.563,41,5.8,94,2.5,1.23,0.13  
L05A,2007/06/14,17:41:04,-5.649,151.563,41,5.8,69,2.75,1.85,0.09  
M03C,2007/06/14,17:41:04,-5.649,151.563,41,5.8,59,2.75,1.2,0.09  
O04C,2007/06/14,17:41:04,-5.649,151.563,41,5.8,50,1.5,1,0.03  
O11A,2007/06/14,17:41:04,-5.649,151.563,41,5.8,157,10,0.85,0.19  
O11A,2007/06/14,17:41:04,-5.649,151.563,41,5.8,157,10,0.85,0.19  
O12A,2007/06/14,17:41:04,-5.649,151.563,41,5.8,149,15.5,0.68,0.19  
R12A,2007/06/14,17:41:04,-5.649,151.563,41,5.8,41,10.25,0.53,0.11  
S11A,2007/06/14,17:41:04,-5.649,151.563,41,5.8,104,6.25,1.2,0.09  
S12A,2007/06/14,17:41:04,-5.649,151.563,41,5.8,53,6.25,1.05,0.12

SN64,2007/06/14,17:41:04,-5.649,151.563,41,5.8,77,1.75,1.93,0.06  
SNA7,2007/06/14,17:41:04,-5.649,151.563,41,5.8,42,4.75,0.73,0.03  
SNC6,2007/06/14,17:41:04,-5.649,151.563,41,5.8,20,7,0.9,0.14  
SNG5,2007/06/14,17:41:04,-5.649,151.563,41,5.8,99,2,1.38,0.09  
ELFS,2007/09/06,17:51:26,24.34,122.219,53,6.2,86,6.75,1.8,0.14  
HELL,2007/09/06,17:51:26,24.34,122.219,53,6.2,102,7.25,0.93,0.08  
K02A,2007/09/06,17:51:26,24.34,122.219,53,6.2,102,6.5,1.83,0.11  
K06A,2007/09/06,17:51:26,24.34,122.219,53,6.2,88,4,2.38,0.07  
K07A,2007/09/06,17:51:26,24.34,122.219,53,6.2,89,4.75,2.35,0.09  
K09A,2007/09/06,17:51:26,24.34,122.219,53,6.2,82,5.75,2.38,0.11  
K10A,2007/09/06,17:51:26,24.34,122.219,53,6.2,98,6.75,1.98,0.14  
L07A,2007/09/06,17:51:26,24.34,122.219,53,6.2,77,6,1.78,0.13  
L08A,2007/09/06,17:51:26,24.34,122.219,53,6.2,78,3.25,2.1,0.07  
L09A,2007/09/06,17:51:26,24.34,122.219,53,6.2,99,4,1.63,0.08  
L10A,2007/09/06,17:51:26,24.34,122.219,53,6.2,103,7.25,2.03,0.22  
L11A,2007/09/06,17:51:26,24.34,122.219,53,6.2,96,1.5,1.85,0.04  
L12A,2007/09/06,17:51:26,24.34,122.219,53,6.2,91,4,1.4,0.09  
M11A,2007/09/06,17:51:26,24.34,122.219,53,6.2,85,3.25,1.55,0.07  
M11A,2007/09/06,17:51:26,24.34,122.219,53,6.2,85,3.25,1.55,0.07  
M12A,2007/09/06,17:51:26,24.34,122.219,53,6.2,115,7.25,1.45,0.24  
N06A,2007/09/06,17:51:26,24.34,122.219,53,6.2,78,5.75,1.85,0.11  
N07B,2007/09/06,17:51:26,24.34,122.219,53,6.2,90,3.25,2.1,0.06  
N08A,2007/09/06,17:51:26,24.34,122.219,53,6.2,90,3.25,1.7,0.05  
N11A,2007/09/06,17:51:26,24.34,122.219,53,6.2,85,7,0.93,0.07  
N11A,2007/09/06,17:51:26,24.34,122.219,53,6.2,85,7,0.93,0.07  
N12A,2007/09/06,17:51:26,24.34,122.219,53,6.2,120,2.5,1.73,0.13  
N12A,2007/09/06,17:51:26,24.34,122.219,53,6.2,120,2.5,1.73,0.13  
O06A,2007/09/06,17:51:26,24.34,122.219,53,6.2,100,5.5,1.18,0.09  
O06A,2007/09/06,17:51:26,24.34,122.219,53,6.2,100,5.5,1.18,0.09  
O07A,2007/09/06,17:51:26,24.34,122.219,53,6.2,90,4,1.05,0.04  
O08A,2007/09/06,17:51:26,24.34,122.219,53,6.2,88,2.5,1.3,0.08  
P08A,2007/09/06,17:51:26,24.34,122.219,53,6.2,74,11.25,1.03,0.09  
R05C,2007/09/06,17:51:26,24.34,122.219,53,6.2,76,5.25,1.35,0.11  
R06C,2007/09/06,17:51:26,24.34,122.219,53,6.2,67,4.25,1.68,0.12  
S06C,2007/09/06,17:51:26,24.34,122.219,53,6.2,102,5,1.4,0.11  
S08C,2007/09/06,17:51:26,24.34,122.219,53,6.2,92,9.5,1.15,0.13  
SN93,2007/09/06,17:51:26,24.34,122.219,53,6.2,98,2.25,2.05,0.04  
SN96,2007/09/06,17:51:26,24.34,122.219,53,6.2,89,5.25,1.6,0.12  
SN97,2007/09/06,17:51:26,24.34,122.219,53,6.2,71,4.25,1.5,0.11  
SNA3,2007/09/06,17:51:26,24.34,122.219,53,6.2,95,8.5,1.8,0.18  
SNA5,2007/09/06,17:51:26,24.34,122.219,53,6.2,99,5.25,1.15,0.09  
SNB7,2007/09/06,17:51:26,24.34,122.219,53,6.2,48,2.5,1.65,0.09  
SNC5,2007/09/06,17:51:26,24.34,122.219,53,6.2,108,3.5,1.3,0.11  
SND8,2007/09/06,17:51:26,24.34,122.219,53,6.2,98,4.5,1.15,0.08  
SNE6,2007/09/06,17:51:26,24.34,122.219,53,6.2,109,1.75,1.45,0.09  
SNE7,2007/09/06,17:51:26,24.34,122.219,53,6.2,84,6.75,0.88,0.06  
SNF8,2007/09/06,17:51:26,24.34,122.219,53,6.2,95,8.75,0.9,0.08  
SNG7,2007/09/06,17:51:26,24.34,122.219,53,6.2,96,2.25,1.75,0.07  
T06C,2007/09/06,17:51:26,24.34,122.219,53,6.2,103,6.25,1.85,0.18  
T11A,2007/09/06,17:51:26,24.34,122.219,53,6.2,51,3.5,1.2,0.16  
HATC,2007/4/3,3:35:07,36.451,70.688,222.1,6.2,55,8,1.05,0.16  
SNC6,2007/4/3,3:35:07,36.451,70.688,222.1,6.2,3,2,1.05,0.04  
T11A,2007/4/3,3:35:07,36.451,70.688,222.1,6.2,67,15.25,1.3,0.2  
U05C,2007/4/3,3:35:07,36.451,70.688,222.1,6.2,79,1.5,1.58,0.06

ELFS,2007/9/13,9:48:45,3.801,126.342,26,6.3,73,3.5,1.25,0.04  
K02A,2007/9/13,9:48:45,3.801,126.342,26,6.3,77,3.75,1.6,0.07  
K05A,2007/9/13,9:48:45,3.801,126.342,26,6.3,82,3,2.18,0.08  
K06A,2007/9/13,9:48:45,3.801,126.342,26,6.3,86,4,2.5,0.15  
K06A,2007/9/13,9:48:45,3.801,126.342,26,6.3,86,4,2.5,0.15  
K07A,2007/9/13,9:48:45,3.801,126.342,26,6.3,86,4,2.5,0.15  
K09A,2007/9/13,9:48:45,3.801,126.342,26,6.3,74,3.5,1.85,0.1  
L04A,2007/9/13,9:48:45,3.801,126.342,26,6.3,74,5,1.73,0.09  
L05A,2007/9/13,9:48:45,3.801,126.342,26,6.3,79,2.5,1.78,0.08  
L07A,2007/9/13,9:48:45,3.801,126.342,26,6.3,71,4.5,1.43,0.09  
L09A,2007/9/13,9:48:45,3.801,126.342,26,6.3,84,6.25,1.38,0.2  
M02C,2007/9/13,9:48:45,3.801,126.342,26,6.3,78,5.75,1.3,0.11  
M04C,2007/9/13,9:48:45,3.801,126.342,26,6.3,80,5,2.08,0.16  
M06C,2007/9/13,9:48:45,3.801,126.342,26,6.3,83,7.5,1.7,0.18  
N06A,2007/9/13,9:48:45,3.801,126.342,26,6.3,87,2,1.88,0.06  
N07B,2007/9/13,9:48:45,3.801,126.342,26,6.3,81,2.75,1.85,0.1  
O04C,2007/9/13,9:48:45,3.801,126.342,26,6.3,68,4.25,1.58,0.1  
Q08A,2007/9/13,9:48:45,3.801,126.342,26,6.3,54,12.75,0.83,0.21  
R05C,2007/9/13,9:48:45,3.801,126.342,26,6.3,74,10.5,1.18,0.18  
R06C,2007/9/13,9:48:45,3.801,126.342,26,6.3,87,3.75,1.73,0.07  
S05C,2007/9/13,9:48:45,3.801,126.342,26,6.3,86,2.75,1.73,0.09  
SN87,2007/9/13,9:48:45,3.801,126.342,26,6.3,71,8.75,1.23,0.12  
SN93,2007/9/13,9:48:45,3.801,126.342,26,6.3,94,2.5,2.05,0.11  
SN96,2007/9/13,9:48:45,3.801,126.342,26,6.3,78,3.5,1.43,0.06  
SN97,2007/9/13,9:48:45,3.801,126.342,26,6.3,69,5.75,1.38,0.09  
SNA3,2007/9/13,9:48:45,3.801,126.342,26,6.3,92,2.5,1.93,0.11  
SNA5,2007/9/13,9:48:45,3.801,126.342,26,6.3,77,6.75,1.35,0.13  
SNA7,2007/9/13,9:48:45,3.801,126.342,26,6.3,83,5.75,1.17,0.09  
SNF8,2007/9/13,9:48:45,3.801,126.342,26,6.3,85,5.75,1.18,0.1
