# Supplementary material
Source: publisher figshare collection journal article supplement (https://gsapubs.figshare.com/ndownloader/files/22411833)
Supplement: Supplementary file 4 [file 22411833]

Archive with 7 entries (7 files):
- Figure S1.pdf
- Figure S2.pdf
- Figure S3.pdf
- Table S1.pdf
- Table S2.pdf
- Table S3.pdf
- Table S4.pdf
