# Supplementary material
Source: publisher figshare collection journal article supplement (https://gsapubs.figshare.com/ndownloader/files/22411833)
Supplement: Supplementary file 4 [file 22411833 › Table S2.pdf]

| Name | Latitude | Longitude | Elevation |
|------|----------|-----------|-----------|
|------|----------|-----------|-----------|

|      |          |            |      |
|------|----------|------------|------|
| ADO  | 34.5505  | -117.4339  | 908  |
| arc  | 36.01233 | -118.33183 | 2614 |
| ARC2 | 36.0106  | -118.3323  | 2597 |
| ARV  | 35.1269  | -118.8301  | 258  |
| BAK  | 35.3444  | -119.1044  | 116  |
| bar  | 36.5195  | -118.528   | 2972 |
| BBR  | 34.2623  | -116.9208  | 2069 |
| BBS  | 33.9214  | -116.9806  | 785  |
| BCC  | 33.5751  | -117.2612  | 391  |
| BDM  | 37.954   | -121.8655  | 220  |
| BEK  | 39.8667  | -120.3586  | 1743 |
| BFS  | 34.2388  | -117.6585  | 1312 |
| BGR  | 36.6283  | -119.0166  | 954  |
| bkr  | 35.84633 | -118.522   | 2265 |
| BKS  | 37.8762  | -122.2356  | 244  |
| BLA  | 34.0695  | -116.389   | 1243 |
| bla  | 36.0965  | -118.277   | 2556 |
| blb  | 36.0965  | -118.277   | 2556 |
| BLK  | 35.088   | -117.2185  | 648  |
| bmd  | 35.873   | -118.32217 | 2454 |
| BMN  | 40.4314  | -117.221   | 1594 |
| BMT  | 35.13583 | -118.59683 | 1237 |
| BNLO | 37.1311  | -122.1729  | 794  |
| BNP  | 37.95517 | -118.30167 | 2438 |
| BOR  | 33.2682  | -116.4172  | 252  |
| BPC  | 37.1282  | -118.4306  | 2370 |
| BRIB | 37.9189  | -122.1517  | 113  |
| BRK  | 37.8735  | -122.261   | 49   |
| BRR  | 36.9127  | -119.0394  | 1289 |
| BVC  | 36.7265  | -117.8628  | 475  |
| CAL  | 35.1035  | -117.94767 | 722  |
| CALB | 34.143   | -118.627   | 0    |
| CAP  | 33.3882  | -117.195   | 285  |
| CCC  | 36.5778  | -118.7868  | 1560 |
| ccr  | 36.60667 | -118.756   | 2195 |
| cdg  | 36.78867 | -118.67467 | 1494 |
| cha  | 36.4585  | -118.4085  | 2082 |
| CHF  | 34.3334  | -118.0258  | 1594 |
| CHP  | 35.8938  | -118.0919  | 2426 |
| CIA  | 33.4019  | -118.4137  | 467  |
| CIU  | 33.4458  | -118.483   | 203  |
| CLC  | 35.81667 | -117.59667 | 766  |
| CMB  | 38.0345  | -120.3865  | 697  |
| cou  | 36.36533 | -118.29433 | 2731 |
| CPR  | 36.7967  | -118.5758  | 1603 |
| CVS  | 38.3453  | -122.4584  | 295  |
| CWC  | 36.4399  | -118.0802  | 1595 |
| DAC  | 36.277   | -117.5937  | 1813 |
| DBO  | 43.119   | -123.2439  | 984  |
| DEC  | 34.2535  | -118.3338  | 519  |
| DEV  | 33.936   | -116.5779  | 337  |
| DGR  | 33.65    | -117.009   | 700  |

**Disclaimer: This is a confidential document and must not be discussed with others, forward in any form, or posted on websites without the express written consent of the Geological Society of America.**

DJJ 34.1062 -118.455 268  
DP00 36.267 -117.641 1725  
DTP 35.2675 -117.84533 951  
EDW2 34.8811 -117.9939 772  
ELFS 40.6183 -120.7279 1553  
FARB 37.6978 -123.0011 -18  
FLL 37.2798 -118.9723 2220  
FLS 34.97033 -117.0385 1037  
FMP 33.7126 -118.2938 89  
FRI 36.99167 -119.70833 119  
FUR 36.4669 -116.8632 -36  
GASB 39.6547 -122.716 1355  
GOR 33.1537 -117.2292 138  
GPO 35.6494 -117.6619 735  
GRA 36.9961 -117.3662 689  
GSC 35.3018 -116.8057 1000  
HAST 36.3887 -121.5514 542  
HATC 40.8161 -121.4612 1013  
HEC 34.8294 -116.335 920  
HELL 36.6801 -119.0228 1145  
HOD 34.83883 -117.24583 829  
HOPS 38.9935 -123.0723 299  
HUMO 42.6071 -122.9567 555  
HVY 36.72 -119.3015 222  
I03A 43.9726 -123.2777 206  
I04A 43.7941 -122.4113 731  
I06A 43.9437 -120.2107 1296  
I08A 43.9104 -118.5692 1189  
I09A 43.9733 -117.7407 950  
ISA 35.6628 -118.474 873  
J02A 43.3654 -123.5747 136  
J03A 43.3717 -122.9646 292  
J04A 43.2406 -122.1093 1952  
J05A 43.2843 -121.2357 1540  
J06A 43.2515 -120.1528 1407  
J07A 43.3736 -119.3105 1273  
J08A 43.358 -118.4743 1229  
J09A 43.3471 -117.7542 1303  
J10A 43.4275 -116.767 748  
JAW 35.31583 -118.04483 762  
JCC 40.8175 -124.0295 27  
JCS 33.0859 -116.5959 1264  
JFS 35.35083 -117.67 1433  
jhn 35.96417 -118.54367 1460  
JRSC 37.4037 -122.2387 70  
JUN 36.581 -118.411 2520  
jun 36.58133 -118.41117 2510  
K01A 42.8088 -124.4692 175  
K02A 42.7667 -123.4898 963  
K04A 42.6133 -121.7307 1305  
K05A 42.7258 -120.8934 1887  
K06A 42.7991 -120.251 1340  
K07A 42.6912 -119.2469 1407  
K08A 42.7308 -118.4864 1391

K09A 42.6996 -117.7251 1176  
K10A 42.7779 -116.8705 1701  
K11A 42.7713 -116.0323 914  
KCC 37.3236 -119.3187 888  
L02A 42.156 -123.6018 485  
L04A 42.175 -121.891 1336  
L05A 42.0472 -120.8336 1751  
L07A 42.0187 -119.3398 1816  
L08A 42.1901 -118.3445 1490  
L09A 42.0192 -117.6667 1430  
L10A 42.0773 -116.4711 1537  
LAVA 38.7552 -120.7395 828  
LGU 34.1082 -119.0659 416  
LMC 36.358 -119.0291 232  
LRL 35.4795 -117.6821 1340  
LRM 35.47733 -117.68917 1256  
M01C 41.8473 -124.1221 38  
M02C 41.392 -122.8538 960  
M03C 41.2742 -122.122 1047  
M04C 41.7826 -121.8393 1391  
M05C 41.3593 -121.1457 1333  
M06C 41.2047 -120.4772 1434  
M07A 41.3884 -119.1711 1400  
M08A 41.4483 -118.3792 1288  
M09A 41.423 -117.4497 1355  
M10A 41.522 -116.5396 1687  
MCCM 38.1448 -122.8802 -8  
MGE 33.8184 -116.3687 68  
MHC 37.3416 -121.6426 1250  
MKW3 36.454 -118.606 2358  
MLAC 37.6302 -118.8361 2162  
mnk 36.45433 -118.60667 2362  
MNRC 38.8787 -122.4428 710  
MNV 38.4328 -118.1531 1524  
MOD 41.9025 -120.3029 1554  
MPM 36.058 -117.489 1839  
MPP 34.8885 -119.8136 1739  
MSJ 33.808 -116.9679 466  
MUR 33.6 -117.1954 562  
MWC 34.2236 -118.0583 1725  
N02C 40.822 -123.3057 717  
N06A 40.7484 -119.8346 1341  
N07A 40.7721 -118.9716 1306  
N07B 40.7797 -118.9711 1302  
N08A 40.7811 -118.1337 1493  
N09A 40.852 -117.5244 1617  
N10A 40.7186 -116.508 1392  
ndl 36.09683 -118.48133 1829  
O01C 40.1398 -123.8195 138  
O02C 40.1767 -122.7883 962  
O03C 39.9971 -122.0319 85  
O04C 40.32 -121.086 1513  
O05C 39.962 -120.9176 1032  
O06A 40.165 -119.8275 1229

O07A 40.1614 -118.8772 1203  
O08A 40.2903 -118.155 2138  
O09A 40.1697 -117.1899 1492  
O10A 40.2917 -116.4999 1470  
OMM 37.6214 -118.9994 2750  
ORV 39.5545 -121.5004 335  
OSI 34.6145 -118.7235 718  
OVY 36.7777 -118.328 2730  
P01C 39.469 -123.3375 441  
P05C 39.3028 -120.6077 1756  
P06A 39.6785 -119.8983 1369  
P07A 39.5399 -118.8893 1219  
P08A 39.6946 -118.08 1040  
P09A 39.5516 -117.1395 1738  
P10A 39.6202 -116.4639 1874  
PACP 37.008 -121.287 844  
PAS 34.1484 -118.1712 314  
PASC 34.1714 -118.1852 341  
PDC 36.0333 -118.9779 201  
PDU 34.1207 -117.6381 445  
PFO 33.6117 -116.4594 1259  
PHL 35.4077 -120.5456 355  
PIN 43.811 -120.8731 1865  
PKD 35.9452 -120.5416 583  
PLM 33.3536 -116.8627 1691  
PLS 33.7953 -117.6091 1199  
pmt 36.02817 -118.1935 2256  
Q03C 38.6333 -122.0145 108  
Q04C 38.839 -121.3769 14  
Q07A 38.9383 -118.8078 1276  
Q08A 38.8606 -117.9316 1412  
Q09A 38.834 -117.1816 1704  
Q10A 38.8247 -116.3999 2027  
Q11A 38.8455 -115.6541 1562  
R04C 38.2571 -120.9363 115  
R05C 38.7028 -120.0755 2366  
R06C 38.5226 -119.4509 1698  
R07C 38.089 -119.0469 1996  
R08A 38.3489 -118.1064 1420  
R09A 38.2397 -117.0718 1759  
R10A 38.2886 -116.3021 1600  
R11A 38.3489 -115.5854 1756  
RAMR 35.636 -120.8698 414  
RCT 36.3052 -119.2438 107  
RPV 33.7435 -118.4041 107  
RRX 34.8753 -116.9968 439  
RSS 33.9733 -117.3267 298  
RVR 33.9935 -117.3755 266  
S04C 37.5049 -121.3278 310  
S05C 37.346 -120.3296 85  
S06C 37.8817 -119.8488 1377  
S08C 37.4993 -118.1711 3087  
S09A 37.7243 -117.2246 1768  
S10A 37.923 -116.5948 1796

S11A 37.6444 -115.7472 1456  
S42A 37.247 -119.5685 1012  
SAO 36.764 -121.4472 317  
SBC 34.4408 -119.7149 94  
SBK 35.07883 -117.58133 881  
SBPX 34.2324 -117.2348 1860  
SCZ 36.598 -121.403 261  
SCZ2 33.9954 -119.6351 440  
SDD 33.5526 -117.6617 120  
SDP 34.5655 -120.5014 631  
SFK 36.3656 -118.8146 838  
SFT 36.2303 -118.0627 1829  
SHO 35.8995 -116.2753 451  
SLA 35.8909 -117.2833 1174  
SLC 36.5245 -117.7175 1938  
SMD 36.9709 -118.6302 1810  
SMM 35.3142 -119.9958 599  
SN11 36.6992 -119.312 171  
SN12 36.9126 -119.0399 1284  
SN14 37.1396 -118.7742 3056  
SN15 37.2781 -118.5994 2434  
SN16 37.3502 -118.2554 1898  
SN21 36.8202 -119.5131 229  
SN22 37.0105 -119.3602 1207  
SN23 37.1234 -119.2141 2087  
SN24 37.2801 -118.9725 2264  
SN25 37.3593 -118.7045 2466  
SN26 37.5718 -118.4875 1680  
SN27 37.6599 -118.3516 1739  
SN28 37.8964 -118.1573 1641  
SN34 37.3909 -119.0627 2401  
SN36 37.6832 -118.6468 2457  
SN37 37.8168 -118.5456 1939  
SN38 38.0514 -118.3528 2063  
SN42 37.2463 -119.5783 942  
SN43 37.4129 -119.4845 2274  
SN44 37.5003 -119.2791 2070  
SN45 37.6826 -119.0827 2571  
SN46 37.7834 -118.9018 2751  
SN47 37.98 -118.7292 2074  
SN48 38.1693 -118.5585 1838  
SN51 37.2529 -120.0581 250  
SN52 37.3426 -119.8147 341  
SN53 37.5138 -119.6748 1459  
SN54 37.7358 -119.5125 1868  
SN55 37.8796 -119.3325 2621  
SN56 37.9739 -119.1693 2944  
SN57 38.1434 -118.9667 2090  
SN62 37.5882 -120.0046 651  
SN63 37.7227 -119.8067 1906  
SN64 37.8652 -119.6469 2423  
SN65 38.0002 -119.5108 2895  
SN66 38.18 -119.3412 2429  
SN67 38.2827 -119.1479 2277

SN71 37.642 -120.4038 157  
SN73 37.8233 -120.1116 982  
SN74 37.9854 -119.9318 1684  
SN75 38.1262 -119.6966 2665  
SN76 38.3617 -119.5137 2106  
SN84 38.1562 -120.1465 1610  
SN85 38.2848 -119.9537 2003  
SN86 38.4927 -119.8069 2632  
SN87 38.6816 -119.6114 2708  
SN93 38.1526 -120.6046 402  
SN95 38.3331 -120.2526 1754  
SN96 38.4751 -120.0422 2243  
SN97 38.809 -119.8058 1770  
SN98 38.9178 -119.4167 1521  
SNA3 38.3823 -120.7091 578  
SNA4 38.5018 -120.535 1146  
SNA5 38.642 -120.3256 1744  
SNA7 39.0081 -119.8949 2350  
SNA8 39.0963 -119.6021 2004  
SNB3 38.5619 -120.9911 245  
SNB5 38.8341 -120.5452 1404  
SNB6 38.8838 -120.2654 2230  
SNB7 39.0516 -120.1548 2021  
SNB9 39.3597 -119.5914 1855  
SNC3 38.7028 -121.1962 76  
SNC4 38.8484 -120.9501 516  
SNC5 39.0278 -120.7534 1006  
SNC6 39.0889 -120.4657 1887  
SNC7 39.3147 -120.388 2281  
SNC8 39.4725 -120.0408 2562  
SNCC 33.248 -119.524 197  
SND4 39.0373 -121.1699 402  
SND5 39.1942 -120.9313 792  
SND7 39.6248 -120.576 1690  
SND8 39.6502 -120.2246 1546  
SND9 39.8259 -120.0095 1608  
SNE4 39.2363 -121.3469 88  
SNE5 39.3837 -121.1626 945  
SNE6 39.4782 -120.8459 1479  
SNE7 39.8043 -120.7136 1537  
SNE9 40.025 -120.1875 1797  
SNF6 39.6818 -121.0913 1535  
SNF8 40.0112 -120.6412 2148  
SNF9 40.1808 -120.3973 1331  
SNG5 39.719 -121.527 652  
SNG7 40.1095 -121.1723 1591  
SNG9 40.3453 -120.6017 1332  
SPG 36.1355 -118.811 314  
SRF 36.936 -118.106 2175  
SRT 35.69183 -117.74933 698  
SUTB 39.2291 -121.7861 252  
SVD 34.1065 -117.0982 605  
T05C 36.8953 -120.6737 46  
T06C 37.0069 -119.7089 216

T11A 37.2408 -115.2202 1402  
TAKO 43.7433 -124.0825 46  
TEJ 35.22983 -118.6895 634  
THX 33.635 -116.164 -31  
TIN 37.0542 -118.2301 1197  
TJR 35.0275 -118.7425 439  
TOV 34.1561 -118.8204 298  
TOW 35.80833 -117.765 684  
TPH 38.075 -117.2225 1883  
TPNV 36.9488 -116.2495 1600  
TUQ 35.4358 -115.9239 1350  
twr 36.34783 -118.4125 2109  
TWR2 36.3513 -118.4066 1969  
U04C 36.3627 -120.7828 813  
U05C 36.3356 -120.1205 92  
U10A 36.4193 -116.3297 668  
U11A 36.423 -115.3835 867  
USC 34.0192 -118.2863 58  
V03C 36.0214 -121.2356 336  
V04C 35.636 -120.8699 431  
V05C 35.8667 -119.9028 118  
V11A 35.8384 -115.4305 1117  
VCS 34.4836 -118.1178 991  
VES 35.8409 -119.0847 154  
VTV 34.5606 -117.3296 843  
WAS 35.73817 -118.557 1871  
WBM 35.608 -117.89 925  
WBS 35.537 -118.1395 1932  
WCH 35.883 -118.07467 2475  
WCN 39.3017 -119.7563 1704  
WCS 36.02633 -117.76683 1143  
WCX 35.7105 -117.59967 671  
WDC 40.5799 -122.5411 268  
WENL 37.6221 -121.757 139  
WHF 35.69617 -118.3485 902  
WHP 36.5885 -118.2216 2416  
WHS 36.105 -117.76117 1448  
WHV 35.51 -118.51783 1006  
wil 36.23783 -118.41667 2009  
WJP 35.41083 -118.48067 1122  
WLH 36.15233 -118.31167 2676  
WMD 36.1979 -118.5749 2668  
wmd 36.199 -118.57533 2615  
WMF 36.1175 -117.85283 1560  
WOF 35.53567 -118.7125 1341  
WOR 35.6965 -118.242 837  
WRC 35.95067 -117.64817 945  
WRV 36.00783 -117.89033 1066  
WSC 35.70433 -117.8865 881  
WSH 35.63267 -117.49167 780  
WVOR 42.4339 -118.6367 1344  
WVP 35.94967 -117.817 1463  
WWP 35.7355 -118.087 1151  
XMS 35.52333 -117.35467 704

YBH 41.7319 -122.7104 1060  
YO01 37.7511 -119.7832 1866  
YO02 37.7731 -119.758 2116  
YO03 37.789 -119.7324 2078  
YO04 37.82 -119.7103 2210  
YO05 37.839 -119.6895 2385  
YO06 37.8508 -119.6146 2507  
YO07 37.8139 -119.58 2495  
YO08 37.807 -119.5452 2493  
YO09 37.8154 -119.5006 2575  
YO10 37.8548 -119.4401 2576  
YO11 37.8807 -119.4033 262
