# Supplementary material
Source: publisher figshare collection journal article supplement (https://gsapubs.figshare.com/ndownloader/files/22411833)
Supplement: Supplementary file 4 [file 22411833 › Table S3.pdf]

lat lon depth Magnitude origin time (UTC) jdate nass Phase  
-35.815 -108.135 10 6.5 06/10/1997 21:53:55 1997161 38 S southern East Pacific Rise  
51.347 -179.332 33 6.4 06/17/1997 21:03:40 1997168 30 S "Andreanof Islands, Aleutian Islands"  
-16.018 -173.047 33 5.8 06/25/1997 3:54:12 1997176 30 S Tonga  
4.868 -82.611 10 5.8 06/26/1997 6:12:10 1997177 32 S south of Panama  
38.334 -26.684 10 5.9 06/27/1997 4:39:53 1997178 33 S "Azores Islands, Portugal"  
19.358 -155.068 7.5 5.7 06/30/1997 15:47:39 1997181 44 S "Hawaii region, Hawaii"  
-4.161 -80.926 33 5.8 06/30/1997 18:56:27 1997181 36 S Peru-Ecuador border region  
16.157 -87.917 33 6.1 07/6/1997 20:13:37 1997187 42 S offshore Honduras  
51.372 -178.582 33 5.9 07/8/1997 12:11:15 1997189 21 S "Andreanof Islands, Aleutian Islands"  
10.598 -63.486 19.9 7 07/9/1997 19:24:13 1997190 55 S "Sucre, Venezuela"  
-22.733 -70.894 33 5.9 07/10/1997 14:55:49 1997191 42 S "near the coast of Antofagasta, Chile"  
43.249 146.381 33 6.1 07/14/1997 16:09:36 1997195 44 S Kuril Islands  
52.562 -167.484 14.4 6.1 07/20/1997 0:30:21 1997201 47 S "Fox Islands, Aleutian islands"  
-22.982 -66.301 256.1 6.1 07/20/1997 10:14:23 1997201 29 S "Jujuy, Argentina"  
1.535 -90.967 10 5.5 07/29/1997 17:40:06 1997210 33 S "Galapagos Islands, Ecuador region"  
-15.477 -179.14 10 6.6 08/8/1997 22:27:20 1997220 64 S Fiji region  
-4.373 -105.698 10 6.3 08/15/1997 7:37:49 1997227 72 S central East Pacific Rise  
-15.235 -175.576 33 6.5 08/29/1997 6:54:00 1997241 56 S Tonga  
3.849 -75.749 198.7 6.8 09/2/1997 12:13:23 1997245 33 S Colombia  
41.911 144.815 33 5.9 10/8/1997 21:21:00 1997281 15 S "Hokkaido, Japan region"  
-1.924 127.899 33 6.4 06/24/1997 23:04:53 1997175 32 SKS "Kepulauan Obi, Indonesia"  
-3.562 144.362 22.8 6.6 08/29/1997 8:14:10 1997241 21 SKS "north coast of New Guinea, Papua New Guinea"  
9.79 125.779 105.6 6.5 10/6/1997 12:30:06 1997279 33 SKS "Mindanao, Philippines"  
-19.987 -69.197 115.6 7.8 06/13/2005 22:44:34 2005164 102 S "Tarapaca, Chile"  
51.017 179.601 47.5 5.6 06/14/2005 11:49:03 2005165 36 S "Rat Islands, Aleutian Islands"  
51.239 179.314 17 6.8 06/14/2005 17:10:12 2005165 177 S "Rat islands, Aleutian islands"  
-36.31 -97.264 10 6.1 07/10/2005 4:46:31 2005191 63 S West Chile Rise  
-17.847 -70.109 79.9 5.9 07/13/2005 12:06:13 2005194 68 S southern Peru  
52.871 160.105 27.6 5.6 07/26/2005 12:17:14 2005207 45 S "off the east coast of Kamchatka Peninsula, Russia"  
52.906 -168.647 50.3 5.6 07/29/2005 5:00:30 2005210 128 S "Fox islands, Aleutian Islands"  
46.995 153.911 16.9 5.7 08/1/2005 4:40:37 2005213 65 S Kuril Islands  
-19.614 -175.85 205.4 6 08/6/2005 9:56:14 2005218 109 S Tonga

**Disclaimer: This is a confidential document and must not be discussed with others, forward in any form, or posted on websites without the express written consent of the Geological Society of America.**

-14.449 -177.293 10 6 08/7/2005 11:35:26 2005219 173 S Fiji region  
 -14.435 -177.242 10 5.8 08/7/2005 14:41:01 2005219 190 S Fiji region  
 -3.999 -104.025 10 5.8 08/21/2005 9:49:50 2005233 214 S central East Pacific Rise  
 43.892 146.145 103 6.1 09/21/2005 2:25:08 2005264 73 S Kuril Islands  
 -5.678 -76.398 115 7.5 09/26/2005 1:55:38 2005269 284 S northern Peru  
 -20.535 -174.277 15 5.9 10/5/2005 10:07:22 2005278 55 S Tonga  
 46.816 154.113 42.8 6.1 10/15/2005 10:06:17 2005288 74 S east of the Kuril Islands  
 38.107 144.896 11 7 11/14/2005 21:38:51 2005318 91 S "off the east coast of Honshu, Japan"  
 -22.361 -67.895 147 6.8 11/17/2005 19:26:54 2005321 254 S "Potosi, Bolivia"  
 53.843 -164.093 30 6.2 11/20/2005 12:53:03 2005324 125 S "Unimal Island region, Alaska"  
 -1.386 -77.517 192.9 6.1 12/23/2005 21:47:28 2005357 86 S Ecuador  
 -3.657 140.178 40 5.8 08/4/2005 9:26:53 2005216 83 SKS "Papua, Indonesia"  
 -3.795 140.156 10 5.9 08/8/2005 8:33:57 2005220 87 SKS "Papua, Indonesia"  
 24.084 122.191 32 5.8 09/6/2005 1:16:02 2005249 97 SKS Taiwan region  
 6.864 -77.793 14 5.5 01/23/2006 20:50:45 2006023 118 S near the west coast of Colombia  
 1.093 -90.46 10 5.9 02/4/2006 9:17:04 2006035 85 S "Galapagos Islands, Ecuador region"  
 -15.98 -173.02 10 5.8 02/16/2006 14:54:39 2006047 68 S Tonga  
 -15.283 -176.239 32.5 6 02/26/2006 4:18:42 2006057 137 S Fiji region  
 60.491 167.516 11 6.6 04/29/2006 16:58:06 2006119 211 S "near the east coast of Koryakskiy Avtonomnyy Okrug, Russia"  
 -27.017 -71.022 12 6.7 04/30/2006 19:17:15 2006120 192 S "offshore Atacama, Chile"  
 -27.211 -71.056 12 6.5 04/30/2006 21:40:58 2006120 194 S "offshore Atacama, Chile"  
 -20.187 -174.123 55 8 05/3/2006 15:26:40 2006123 255 S Tonga  
 52.515 -169.256 18 6.4 05/10/2006 2:42:51 2006130 207 S "Fox Islands, Aleutian islands, Alaska"  
 54.271 158.447 197 6.2 05/22/2006 13:08:03 2006142 124 S "Kamchatka Peninsula, Russia"  
 45.417 149.343 95 6 06/22/2006 10:53:12 2006173 190 S Kuril Islands  
 -15.244 -173.61 35 6 07/7/2006 7:26:13 2006188 309 S Tonga  
 51.214 -179.312 22 6.6 07/8/2006 20:40:01 2006189 168 S "Andreanof Islands, Aleutian Islands"  
 49.823 156.415 26 6 08/20/2006 3:01:02 2006232 76 S Kuril Islands  
 51.148 157.522 43 6.5 08/24/2006 21:50:37 2006236 180 S "near the east coast of the Kamchatka Peninsula, Russia"  
 -24.403 -67.028 184 6.6 08/25/2006 0:44:46 2006237 168 S "Salta, Argentina"  
 53.97 -166.392 75.6 5.9 09/1/2006 12:04:22 2006244 126 S "Fox Islands, Aleutian Islands, Alaska"  
 26.319 -86.606 14 5.9 09/10/2006 14:56:08 2006253 85 S Gulf of Mexico  
 51.596 -173.961 18 5.8 09/18/2006 3:45:57 2006261 81 S "Andreanof Islands, Aleutian Islands"  
 46.462 153.36 11 5.9 09/28/2006 1:36:48 2006271 148 S Kuril Islands  
 -16.592 -172.033 28 6.9 09/28/2006 6:22:10 2006271 180 S Samoa Islands region  
 10.876 -61.756 53 6.1 09/29/2006 13:08:26 2006272 211 S "Trinidad region, Trinidad and Tobago"  
 46.351 153.166 11 6.6 09/30/2006 17:50:23 2006273 182 S Kuril Islands

46.47 153.24 19 6.5 10/1/2006 9:06:02 2006274 171 S Kuril Islands  
 46.238 153.277 4 5.9 10/13/2006 13:47:39 2006286 249 S Kuril Islands  
 -13.457 -76.677 23 6.7 10/20/2006 10:48:56 2006293 180 S near the coast of  
 central Peru  
 13.994 -91.207 61.2 6 12/3/2006 20:52:16 2006337 142 S Guatemala  
 -9.273 150.481 10 5.7 08/15/2006 5:43:21 2006227 71 SKS "eastern New Guinea  
 region, Papua New Guinea"  
 -3.08 129.441 17 6.3 09/16/2006 9:45:24 2006259 208 SKS "Seram, Indonesia"  
 21.799 120.547 10 7.1 12/26/2006 12:26:21 2006360 215 SKS Taiwan region  
 -4.609 -105.145 10 5.6 01/15/2007 21:19:40 2007015 47 S central East  
 Pacific Rise  
 -7.006 -80.485 23 6.3 02/24/2007 2:36:24 2007055 189 S off the coast of  
 northern Peru  
 4.585 -78.494 7 6.2 03/18/2007 2:11:05 2007077 178 S south of Panama  
 37.306 -24.494 8 6.1 04/7/2007 7:09:25 2007097 48 S Azores Islands region  
 -35.051 -108.836 10 6.1 04/13/2007 18:24:19 2007103 52 S southern East  
 Pacific Rise  
 52.007 -179.972 117 6.2 04/29/2007 12:41:57 2007119 188 S "Andreanof  
 Islands, Aleutian Islands"  
 -24.222 -67.027 180.5 5.9 05/25/2007 17:47:31 2007145 92 S "Salta,  
 Argentina"  
 52.137 157.293 116 6.4 05/30/2007 20:22:13 2007150 149 S "Kamchatka  
 Peninsula, Russia"  
 13.835 -90.766 47.8 5.8 06/8/2007 13:32:01 2007159 97 S Offshore Guatemala  
 43.663 144.734 130.4 5.8 07/1/2007 4:12:08 2007182 176 S "Hokkaido, Japan  
 region"  
 -7.933 -74.379 152.1 6.1 07/12/2007 5:23:49 2007193 208 S northern Peru  
 -8.133 -71.272 644.9 6.1 07/21/2007 13:27:04 2007202 281 S "Acre, Brazil"  
 -22.151 -65.777 289.5 6.4 07/21/2007 15:34:53 2007202 275 S "Jujuy,  
 Argentina"  
 53.641 169.702 25.7 5.9 07/29/2007 4:54:37 2007210 86 S "Komandorskiye  
 Ostrova, Russia"  
 51.307 -179.971 21 6.7 08/2/2007 3:21:43 2007214 139 S "Andreanof Islands,  
 Aleutian Islands"  
 50.322 -177.548 9 6.5 08/15/2007 20:22:11 2007227 74 S "Andreanof Islands,  
 Aleutian Islands"  
 -13.386 -76.603 39 8 08/15/2007 23:40:58 2007227 148 S near the coast of  
 central Peru  
 -14.282 -76.127 23.4 6.4 08/16/2007 5:16:56 2007228 268 S near the coast of  
 central Peru  
 -13.805 -76.291 30 6 08/18/2007 2:52:35 2007230 173 S near the coast of  
 central Peru  
 8.037 -39.251 6 6.5 08/20/2007 22:42:29 2007232 116 S central Mid-Atlantic  
 Ridge  
 -17.457 -174.335 127.4 6.1 08/26/2007 12:37:31 2007238 345 S Tonga  
 1.065 126.282 22 7.5 1/21/07 11:27:45.00 2007021 107 SKS Molucca Sea  
 -1.034 126.976 12 6.7 2/20/07 8:04:25.00 2007051 167 SKS "Kepulauan Sula,  
 Indonesia"  
 -1.065 127.343 24 6.1 5/29/07 9:36:06.00 2007149 75 SKS "Kepulauan Obi,  
 Indonesia"  
 -2.797 141.66 10 5.8 7/22/07 10:49:35.00 2007203 125 SKS "near the north  
 coast of New Guinea, Papua New Guinea"  
 2.872 127.464 25 6.9 7/26/07 5:40:16.00 2007207 227 SKS Molucca Sea  
 -0.162 -17.795 11 6.2 7/31/07 22:55:31.00 2007212 71 SKS north of Ascension

Island

6.134 127.381 8 6.4 8/20/07 13:46:17.00 2007232 90 SKS Philippine Islands  
regio
