# Supplementary material
Source: publisher figshare collection journal article supplement (https://gsapubs.figshare.com/ndownloader/files/22411833)
Supplement: Supplementary file 4 [file 22411833 › Table S4.pdf]

|      |      |     |    |         |          |          |         |        |        |
|------|------|-----|----|---------|----------|----------|---------|--------|--------|
| 2005 | 351  | 1   | 14 | 57.6869 | 84.14100 | -1.23000 | 10.0000 | 48     | -0.017 |
| HUMO | 2005 | 351 | 1  | 23      | 57.728   | P        | 0.200   | -0.040 |        |
| M04C | 2005 | 351 | 1  | 24      | 3.243    | P        | 0.200   | -0.210 |        |
| M05C | 2005 | 351 | 1  | 24      | 6.105    | P        | 0.200   | 0.044  |        |
| M02C | 2005 | 351 | 1  | 24      | 6.730    | P        | 0.200   | -0.071 |        |
| M03C | 2005 | 351 | 1  | 24      | 6.999    | P        | 0.200   | -0.282 |        |
| M06C | 2005 | 351 | 1  | 24      | 7.278    | P        | 0.200   | 0.465  |        |
| N02C | 2005 | 351 | 1  | 24      | 11.426   | P        | 0.200   | 0.059  |        |
| WDC  | 2005 | 351 | 1  | 24      | 11.540   | P        | 0.200   | -0.953 |        |
| ELFS | 2005 | 351 | 1  | 24      | 11.575   | P        | 0.200   | 0.205  |        |
| O04C | 2005 | 351 | 1  | 24      | 13.697   | P        | 0.200   | -0.030 |        |
| O05C | 2005 | 351 | 1  | 24      | 15.919   | P        | 0.200   | -0.302 |        |
| GASB | 2005 | 351 | 1  | 24      | 19.430   | P        | 0.200   | -0.124 |        |
| SUTB | 2005 | 351 | 1  | 24      | 20.510   | P        | 0.200   | -1.405 |        |
| P05C | 2005 | 351 | 1  | 24      | 20.542   | P        | 0.200   | -0.348 |        |
| LAVA | 2005 | 351 | 1  | 24      | 24.052   | P        | 0.200   | -0.775 |        |
| R05C | 2005 | 351 | 1  | 24      | 24.917   | P        | 0.200   | -0.161 |        |
| MNRC | 2005 | 351 | 1  | 24      | 25.006   | P        | 0.200   | 0.070  |        |
| SN86 | 2005 | 351 | 1  | 24      | 26.320   | P        | 0.200   | -0.109 |        |
| SN76 | 2005 | 351 | 1  | 24      | 27.082   | P        | 0.200   | -0.008 |        |
| TPH  | 2005 | 351 | 1  | 24      | 27.095   | P        | 0.200   | -0.520 |        |
| SN95 | 2005 | 351 | 1  | 24      | 27.301   | P        | 0.200   | -0.422 |        |
| SN85 | 2005 | 351 | 1  | 24      | 27.663   | P        | 0.200   | -0.267 |        |
| SN38 | 2005 | 351 | 1  | 24      | 28.638   | P        | 0.200   | 0.104  |        |
| SN57 | 2005 | 351 | 1  | 24      | 28.763   | P        | 0.200   | 0.497  |        |
| R07C | 2005 | 351 | 1  | 24      | 29.056   | P        | 0.200   | 0.339  |        |
| SN47 | 2005 | 351 | 1  | 24      | 29.591   | P        | 0.200   | 0.287  |        |
| SN74 | 2005 | 351 | 1  | 24      | 29.607   | P        | 0.200   | -0.396 |        |
| S06C | 2005 | 351 | 1  | 24      | 30.401   | P        | 0.200   | -0.213 |        |
| SN37 | 2005 | 351 | 1  | 24      | 30.649   | P        | 0.200   | 0.295  |        |
| SN55 | 2005 | 351 | 1  | 24      | 30.693   | P        | 0.200   | 0.185  |        |
| SN73 | 2005 | 351 | 1  | 24      | 30.884   | P        | 0.200   | -0.309 |        |
| SN46 | 2005 | 351 | 1  | 24      | 31.464   | P        | 0.200   | 0.524  |        |
| SN36 | 2005 | 351 | 1  | 24      | 31.773   | P        | 0.200   | 0.377  |        |
| SN54 | 2005 | 351 | 1  | 24      | 31.789   | P        | 0.200   | 0.239  |        |
| SN45 | 2005 | 351 | 1  | 24      | 32.202   | P        | 0.200   | 0.368  |        |
| SN71 | 2005 | 351 | 1  | 24      | 32.216   | P        | 0.200   | -0.322 |        |
| SN62 | 2005 | 351 | 1  | 24      | 32.654   | P        | 0.200   | -0.077 |        |
| SN53 | 2005 | 351 | 1  | 24      | 33.282   | P        | 0.200   | 0.107  |        |
| SN44 | 2005 | 351 | 1  | 24      | 33.632   | P        | 0.200   | 0.475  |        |
| S04C | 2005 | 351 | 1  | 24      | 34.116   | P        | 0.200   | 0.032  |        |
| TPNV | 2005 | 351 | 1  | 24      | 34.155   | P        | 0.200   | -0.861 |        |
| SN34 | 2005 | 351 | 1  | 24      | 34.180   | P        | 0.200   | 0.374  |        |
| SN52 | 2005 | 351 | 1  | 24      | 34.195   | P        | 0.200   | -0.116 |        |
| SN25 | 2005 | 351 | 1  | 24      | 34.281   | P        | 0.200   | 0.498  |        |
| SN43 | 2005 | 351 | 1  | 24      | 34.486   | P        | 0.200   | 0.595  |        |
| S05C | 2005 | 351 | 1  | 24      | 34.489   | P        | 0.200   | -0.043 |        |
| SN51 | 2005 | 351 | 1  | 24      | 35.037   | P        | 0.200   | -0.127 |        |
| SN15 | 2005 | 351 | 1  | 24      | 35.046   | P        | 0.200   | 0.646  |        |
| GRA  | 2005 | 351 | 1  | 24      | 35.431   | P        | 0.200   | 0.254  |        |
| MHC  | 2005 | 351 | 1  | 24      | 35.725   | P        | 0.200   | 0.144  |        |
| TIN  | 2005 | 351 | 1  | 24      | 36.063   | P        | 0.200   | 0.550  |        |
| SN23 | 2005 | 351 | 1  | 24      | 36.287   | P        | 0.200   | 0.520  |        |
| T06C | 2005 | 351 | 1  | 24      | 36.525   | P        | 0.200   | -0.083 |        |
| SN22 | 2005 | 351 | 1  | 24      | 36.683   | P        | 0.200   | 0.182  |        |
| SN11 | 2005 | 351 | 1  | 24      | 37.869   | P        | 0.200   | -0.639 |        |
| HELL | 2005 | 351 | 1  | 24      | 38.675   | P        | 0.200   | 0.082  |        |
| HAST | 2005 | 351 | 1  | 24      | 41.942   | P        | 0.200   | -0.253 |        |
| MPM  | 2005 | 351 | 1  | 24      | 42.574   | P        | 0.200   | 0.342  |        |
| SHO  | 2005 | 351 | 1  | 24      | 42.626   | P        | 0.200   | 0.323  |        |
| PKD  | 2005 | 351 | 1  | 24      | 44.811   | P        | 0.200   | 0.060  |        |
| ISA  | 2005 | 351 | 1  | 24      | 45.429   | P        | 0.200   | 0.012  |        |
| LRL  | 2005 | 351 | 1  | 24      | 46.424   | P        | 0.200   | 0.127  |        |

|      |      |     |   |    |        |   |       |        |
|------|------|-----|---|----|--------|---|-------|--------|
| GSC  | 2005 | 351 | 1 | 24 | 47.123 | P | 0.200 | 0.124  |
| HEC  | 2005 | 351 | 1 | 24 | 50.036 | P | 0.200 | 0.055  |
| EDW2 | 2005 | 351 | 1 | 24 | 50.562 | P | 0.200 | 0.009  |
| BFS  | 2005 | 351 | 1 | 24 | 54.877 | P | 0.200 | -0.102 |

|      |      |     |    |         |          |   |         |         |    |        |
|------|------|-----|----|---------|----------|---|---------|---------|----|--------|
| 2005 | 232  | 10  | 51 | 24.0172 | 70.92600 |   | 8.98400 | 10.0000 | 14 | -0.009 |
| HUMO | 2005 | 232 | 11 | 1       | 40.804   | P | 0.200   | -0.434  |    |        |
| M04C | 2005 | 232 | 11 | 1       | 44.995   | P | 0.200   | -0.306  |    |        |
| YBH  | 2005 | 232 | 11 | 1       | 45.638   | P | 0.200   | -0.968  |    |        |
| BMN  | 2005 | 232 | 11 | 1       | 46.673   | P | 0.200   | -0.446  |    |        |
| M06C | 2005 | 232 | 11 | 1       | 47.333   | P | 0.200   | 0.361   |    |        |
| M03C | 2005 | 232 | 11 | 1       | 48.420   | P | 0.200   | -0.365  |    |        |
| M02C | 2005 | 232 | 11 | 1       | 48.577   | P | 0.200   | -0.447  |    |        |
| ELFS | 2005 | 232 | 11 | 1       | 51.306   | P | 0.200   | 0.147   |    |        |
| WDC  | 2005 | 232 | 11 | 1       | 52.702   | P | 0.200   | -0.972  |    |        |
| N02C | 2005 | 232 | 11 | 1       | 53.203   | P | 0.200   | -0.167  |    |        |
| O04C | 2005 | 232 | 11 | 1       | 53.472   | P | 0.200   | -0.058  |    |        |
| O05C | 2005 | 232 | 11 | 1       | 55.263   | P | 0.200   | -0.275  |    |        |
| ORV  | 2005 | 232 | 11 | 1       | 58.020   | P | 0.200   | -0.713  |    |        |
| P05C | 2005 | 232 | 11 | 1       | 58.999   | P | 0.200   | -0.323  |    |        |
| SUTB | 2005 | 232 | 11 | 1       | 59.976   | P | 0.200   | -1.185  |    |        |
| TPH  | 2005 | 232 | 11 | 2       | 1.307    | P | 0.200   | -0.747  |    |        |
| LAVA | 2005 | 232 | 11 | 2       | 1.886    | P | 0.200   | -0.975  |    |        |
| R05C | 2005 | 232 | 11 | 2       | 2.267    | P | 0.200   | -0.249  |    |        |
| Q04C | 2005 | 232 | 11 | 2       | 2.909    | P | 0.200   | -0.235  |    |        |
| SN86 | 2005 | 232 | 11 | 2       | 3.300    | P | 0.200   | -0.126  |    |        |
| SN48 | 2005 | 232 | 11 | 2       | 3.407    | P | 0.200   | -0.057  |    |        |
| R06C | 2005 | 232 | 11 | 2       | 3.597    | P | 0.200   | 0.978   |    |        |
| SN38 | 2005 | 232 | 11 | 2       | 3.741    | P | 0.200   | -0.153  |    |        |
| SN76 | 2005 | 232 | 11 | 2       | 3.897    | P | 0.200   | 0.202   |    |        |
| SN67 | 2005 | 232 | 11 | 2       | 3.960    | P | 0.200   | 0.280   |    |        |
| SN28 | 2005 | 232 | 11 | 2       | 4.321    | P | 0.200   | -0.180  |    |        |
| SN85 | 2005 | 232 | 11 | 2       | 4.513    | P | 0.200   | -0.346  |    |        |
| SN95 | 2005 | 232 | 11 | 2       | 4.539    | P | 0.200   | -0.392  |    |        |
| SN57 | 2005 | 232 | 11 | 2       | 4.568    | P | 0.200   | 0.327   |    |        |
| MNRC | 2005 | 232 | 11 | 2       | 4.689    | P | 0.200   | 0.309   |    |        |
| HOPS | 2005 | 232 | 11 | 2       | 4.778    | P | 0.200   | 0.318   |    |        |
| SN66 | 2005 | 232 | 11 | 2       | 4.934    | P | 0.200   | 0.276   |    |        |
| R07C | 2005 | 232 | 11 | 2       | 4.975    | P | 0.200   | 0.285   |    |        |
| SN47 | 2005 | 232 | 11 | 2       | 5.142    | P | 0.200   | 0.236   |    |        |
| SN84 | 2005 | 232 | 11 | 2       | 5.344    | P | 0.200   | -0.494  |    |        |
| SN37 | 2005 | 232 | 11 | 2       | 5.891    | P | 0.200   | 0.266   |    |        |
| R04C | 2005 | 232 | 11 | 2       | 5.935    | P | 0.200   | -0.050  |    |        |
| Q03C | 2005 | 232 | 11 | 2       | 5.988    | P | 0.200   | 0.630   |    |        |
| SN56 | 2005 | 232 | 11 | 2       | 6.173    | P | 0.200   | 0.464   |    |        |
| CMB  | 2005 | 232 | 11 | 2       | 6.196    | P | 0.200   | -0.692  |    |        |
| SN74 | 2005 | 232 | 11 | 2       | 6.303    | P | 0.200   | -0.330  |    |        |
| SN46 | 2005 | 232 | 11 | 2       | 7.021    | P | 0.200   | 0.549   |    |        |
| SN36 | 2005 | 232 | 11 | 2       | 7.022    | P | 0.200   | 0.358   |    |        |
| S08C | 2005 | 232 | 11 | 2       | 7.317    | P | 0.200   | 0.061   |    |        |
| SN73 | 2005 | 232 | 11 | 2       | 7.521    | P | 0.200   | -0.280  |    |        |
| SN45 | 2005 | 232 | 11 | 2       | 7.813    | P | 0.200   | 0.336   |    |        |
| SN63 | 2005 | 232 | 11 | 2       | 8.260    | P | 0.200   | 0.143   |    |        |
| SN16 | 2005 | 232 | 11 | 2       | 8.418    | P | 0.200   | 0.333   |    |        |
| SN26 | 2005 | 232 | 11 | 2       | 8.832    | P | 0.200   | 1.839   |    |        |
| SN71 | 2005 | 232 | 11 | 2       | 9.015    | P | 0.200   | -0.221  |    |        |
| SN62 | 2005 | 232 | 11 | 2       | 9.030    | P | 0.200   | 0.029   |    |        |
| SN44 | 2005 | 232 | 11 | 2       | 9.182    | P | 0.200   | 0.391   |    |        |
| SN25 | 2005 | 232 | 11 | 2       | 9.321    | P | 0.200   | 0.562   |    |        |
| SN53 | 2005 | 232 | 11 | 2       | 9.519    | P | 0.200   | 0.389   |    |        |
| SN15 | 2005 | 232 | 11 | 2       | 9.771    | P | 0.200   | 0.494   |    |        |
| SN43 | 2005 | 232 | 11 | 2       | 10.022   | P | 0.200   | 0.418   |    |        |
| SN24 | 2005 | 232 | 11 | 2       | 10.154   | P | 0.200   | 0.457   |    |        |

|      |      |     |    |   |        |   |       |        |
|------|------|-----|----|---|--------|---|-------|--------|
| SN52 | 2005 | 232 | 11 | 2 | 10.233 | P | 0.200 | 0.031  |
| TIN  | 2005 | 232 | 11 | 2 | 10.317 | P | 0.200 | 0.504  |
| WENL | 2005 | 232 | 11 | 2 | 10.486 | P | 0.200 | -0.699 |
| BRK  | 2005 | 232 | 11 | 2 | 10.520 | P | 0.200 | 0.224  |
| SN42 | 2005 | 232 | 11 | 2 | 10.790 | P | 0.200 | 0.130  |
| S05C | 2005 | 232 | 11 | 2 | 10.896 | P | 0.200 | 0.064  |
| SN51 | 2005 | 232 | 11 | 2 | 10.986 | P | 0.200 | -0.222 |
| SN23 | 2005 | 232 | 11 | 2 | 11.375 | P | 0.200 | 0.435  |
| S04C | 2005 | 232 | 11 | 2 | 11.416 | P | 0.200 | 0.077  |
| SN22 | 2005 | 232 | 11 | 2 | 11.835 | P | 0.200 | 0.145  |
| T06C | 2005 | 232 | 11 | 2 | 12.059 | P | 0.200 | -0.011 |
| SN11 | 2005 | 232 | 11 | 2 | 12.787 | P | 0.200 | -0.601 |
| MHC  | 2005 | 232 | 11 | 2 | 13.165 | P | 0.200 | 0.253  |
| SHO  | 2005 | 232 | 11 | 2 | 13.815 | P | 0.200 | -0.014 |
| CWC  | 2005 | 232 | 11 | 2 | 13.989 | P | 0.200 | 0.583  |
| PACP | 2005 | 232 | 11 | 2 | 14.882 | P | 0.200 | 0.535  |
| MPM  | 2005 | 232 | 11 | 2 | 15.012 | P | 0.200 | -0.014 |
| RCT  | 2005 | 232 | 11 | 2 | 15.161 | P | 0.200 | -0.650 |
| TUQ  | 2005 | 232 | 11 | 2 | 16.122 | P | 0.200 | -0.072 |
| SAO  | 2005 | 232 | 11 | 2 | 16.348 | P | 0.200 | 0.342  |
| VES  | 2005 | 232 | 11 | 2 | 17.526 | P | 0.200 | -0.919 |
| U04C | 2005 | 232 | 11 | 2 | 17.946 | P | 0.200 | 0.305  |
| GSC  | 2005 | 232 | 11 | 2 | 18.519 | P | 0.200 | 0.025  |
| ISA  | 2005 | 232 | 11 | 2 | 18.629 | P | 0.200 | -0.016 |
| LRL  | 2005 | 232 | 11 | 2 | 18.737 | P | 0.200 | 0.044  |
| PKD  | 2005 | 232 | 11 | 2 | 20.061 | P | 0.200 | 0.101  |
| HEC  | 2005 | 232 | 11 | 2 | 20.686 | P | 0.200 | 0.046  |
| SMM  | 2005 | 232 | 11 | 2 | 22.633 | P | 0.200 | -0.198 |
| EDW2 | 2005 | 232 | 11 | 2 | 22.782 | P | 0.200 | 0.131  |
| BBR  | 2005 | 232 | 11 | 2 | 25.141 | P | 0.200 | 0.144  |
| MPP  | 2005 | 232 | 11 | 2 | 25.754 | P | 0.200 | 0.430  |
| BFS  | 2005 | 232 | 11 | 2 | 26.020 | P | 0.200 | -0.187 |
| DEC  | 2005 | 232 | 11 | 2 | 26.815 | P | 0.200 | -0.095 |
| LGU  | 2005 | 232 | 11 | 2 | 28.590 | P | 0.200 | -0.174 |
| CIA  | 2005 | 232 | 11 | 2 | 32.129 | P | 0.200 | 0.075  |

|      |      |    |    |         |          |         |         |        |        |
|------|------|----|----|---------|----------|---------|---------|--------|--------|
| 2006 | 45   | 0  | 39 | 50.6065 | 84.25300 | 0.40800 | 10.0000 | 111    | -0.024 |
| HUMO | 2006 | 45 | 0  | 48      | 51.108   | P       | 0.200   | -0.077 |        |
| M04C | 2006 | 45 | 0  | 48      | 56.749   | P       | 0.200   | -0.146 |        |
| YBH  | 2006 | 45 | 0  | 48      | 57.001   | P       | 0.200   | -0.579 |        |
| M05C | 2006 | 45 | 0  | 48      | 59.626   | P       | 0.200   | 0.108  |        |
| M02C | 2006 | 45 | 0  | 49      | 0.162    | P       | 0.200   | -0.055 |        |
| M03C | 2006 | 45 | 0  | 49      | 0.398    | P       | 0.200   | -0.318 |        |
| M06C | 2006 | 45 | 0  | 49      | 0.815    | P       | 0.200   | 0.529  |        |
| HATC | 2006 | 45 | 0  | 49      | 3.639    | P       | 0.200   | -0.014 |        |
| BMN  | 2006 | 45 | 0  | 49      | 3.857    | P       | 0.200   | -0.111 |        |
| N02C | 2006 | 45 | 0  | 49      | 4.845    | P       | 0.200   | 0.074  |        |
| WDC  | 2006 | 45 | 0  | 49      | 4.977    | P       | 0.200   | -0.938 |        |
| ELFS | 2006 | 45 | 0  | 49      | 5.055    | P       | 0.200   | 0.220  |        |
| O04C | 2006 | 45 | 0  | 49      | 7.168    | P       | 0.200   | -0.014 |        |
| O02C | 2006 | 45 | 0  | 49      | 8.886    | P       | 0.200   | -0.293 |        |
| O05C | 2006 | 45 | 0  | 49      | 9.543    | P       | 0.200   | -0.138 |        |
| BEK  | 2006 | 45 | 0  | 49      | 9.903    | P       | 0.200   | -0.197 |        |
| GASB | 2006 | 45 | 0  | 49      | 12.912   | P       | 0.200   | -0.059 |        |
| SUTB | 2006 | 45 | 0  | 49      | 14.013   | P       | 0.200   | -1.341 |        |
| P05C | 2006 | 45 | 0  | 49      | 14.022   | P       | 0.200   | -0.333 |        |
| LAVA | 2006 | 45 | 0  | 49      | 17.478   | P       | 0.200   | -0.810 |        |
| Q04C | 2006 | 45 | 0  | 49      | 17.751   | P       | 0.200   | -0.238 |        |
| MNRC | 2006 | 45 | 0  | 49      | 18.393   | P       | 0.200   | 0.030  |        |
| R05C | 2006 | 45 | 0  | 49      | 18.408   | P       | 0.200   | -0.146 |        |
| MNV  | 2006 | 45 | 0  | 49      | 18.840   | P       | 0.200   | -0.271 |        |
| R06C | 2006 | 45 | 0  | 49      | 19.134   | P       | 0.200   | -0.214 |        |
| SN76 | 2006 | 45 | 0  | 49      | 20.585   | P       | 0.200   | 0.003  |        |

|      |      |     |    |         |          |         |         |        |
|------|------|-----|----|---------|----------|---------|---------|--------|
| TPH  | 2006 | 45  | 0  | 49      | 20.599   | P       | 0.200   | -0.558 |
| SN85 | 2006 | 45  | 0  | 49      | 21.156   | P       | 0.200   | -0.253 |
| SN48 | 2006 | 45  | 0  | 49      | 21.392   | P       | 0.200   | 0.048  |
| R04C | 2006 | 45  | 0  | 49      | 21.644   | P       | 0.200   | -0.133 |
| SN38 | 2006 | 45  | 0  | 49      | 22.066   | P       | 0.200   | 0.018  |
| SN57 | 2006 | 45  | 0  | 49      | 22.128   | P       | 0.200   | 0.361  |
| R07C | 2006 | 45  | 0  | 49      | 22.569   | P       | 0.200   | 0.349  |
| CMB  | 2006 | 45  | 0  | 49      | 22.769   | P       | 0.200   | -0.539 |
| SN28 | 2006 | 45  | 0  | 49      | 23.062   | P       | 0.200   | 0.111  |
| SN47 | 2006 | 45  | 0  | 49      | 23.160   | P       | 0.200   | 0.346  |
| S06C | 2006 | 45  | 0  | 49      | 23.895   | P       | 0.200   | -0.202 |
| SN55 | 2006 | 45  | 0  | 49      | 24.199   | P       | 0.200   | 0.197  |
| SN37 | 2006 | 45  | 0  | 49      | 24.222   | P       | 0.200   | 0.356  |
| SN73 | 2006 | 45  | 0  | 49      | 24.272   | P       | 0.200   | -0.396 |
| SN46 | 2006 | 45  | 0  | 49      | 25.029   | P       | 0.200   | 0.584  |
| SN36 | 2006 | 45  | 0  | 49      | 25.294   | P       | 0.200   | 0.391  |
| SN71 | 2006 | 45  | 0  | 49      | 25.747   | P       | 0.200   | -0.257 |
| SN26 | 2006 | 45  | 0  | 49      | 25.896   | P       | 0.200   | 0.422  |
| SN62 | 2006 | 45  | 0  | 49      | 25.994   | P       | 0.200   | -0.216 |
| S08C | 2006 | 45  | 0  | 49      | 26.223   | P       | 0.200   | 0.147  |
| SN53 | 2006 | 45  | 0  | 49      | 26.829   | P       | 0.200   | 0.168  |
| SN44 | 2006 | 45  | 0  | 49      | 27.138   | P       | 0.200   | 0.489  |
| SN16 | 2006 | 45  | 0  | 49      | 27.392   | P       | 0.200   | 0.369  |
| WENL | 2006 | 45  | 0  | 49      | 27.489   | P       | 0.200   | 0.594  |
| S04C | 2006 | 45  | 0  | 49      | 27.525   | P       | 0.200   | -0.009 |
| SN52 | 2006 | 45  | 0  | 49      | 27.688   | P       | 0.200   | -0.106 |
| SN34 | 2006 | 45  | 0  | 49      | 27.740   | P       | 0.200   | 0.434  |
| SN25 | 2006 | 45  | 0  | 49      | 27.800   | P       | 0.200   | 0.508  |
| S05C | 2006 | 45  | 0  | 49      | 27.821   | P       | 0.200   | -0.183 |
| SN15 | 2006 | 45  | 0  | 49      | 28.517   | P       | 0.200   | 0.610  |
| SN51 | 2006 | 45  | 0  | 49      | 28.524   | P       | 0.200   | -0.114 |
| GRA  | 2006 | 45  | 0  | 49      | 29.128   | P       | 0.200   | 0.414  |
| MHC  | 2006 | 45  | 0  | 49      | 29.227   | P       | 0.200   | 0.204  |
| TIN  | 2006 | 45  | 0  | 49      | 29.591   | P       | 0.200   | 0.560  |
| SN23 | 2006 | 45  | 0  | 49      | 29.743   | P       | 0.200   | 0.480  |
| T06C | 2006 | 45  | 0  | 49      | 29.970   | P       | 0.200   | -0.123 |
| SN22 | 2006 | 45  | 0  | 49      | 30.186   | P       | 0.200   | 0.192  |
| SN21 | 2006 | 45  | 0  | 49      | 30.832   | P       | 0.200   | -0.486 |
| PACP | 2006 | 45  | 0  | 49      | 31.596   | P       | 0.200   | 0.553  |
| FUR  | 2006 | 45  | 0  | 49      | 32.136   | P       | 0.200   | 0.001  |
| HELL | 2006 | 45  | 0  | 49      | 32.184   | P       | 0.200   | 0.095  |
| SAO  | 2006 | 45  | 0  | 49      | 32.824   | P       | 0.200   | 0.032  |
| CWC  | 2006 | 45  | 0  | 49      | 34.120   | P       | 0.200   | 0.779  |
| U04C | 2006 | 45  | 0  | 49      | 35.479   | P       | 0.200   | 0.133  |
| SHO  | 2006 | 45  | 0  | 49      | 36.144   | P       | 0.200   | 0.283  |
| VES  | 2006 | 45  | 0  | 49      | 37.208   | P       | 0.200   | -0.798 |
| PKD  | 2006 | 45  | 0  | 49      | 38.234   | P       | 0.200   | 0.023  |
| ISA  | 2006 | 45  | 0  | 49      | 38.847   | P       | 0.200   | -0.075 |
| LRL  | 2006 | 45  | 0  | 49      | 39.960   | P       | 0.200   | 0.140  |
| GSC  | 2006 | 45  | 0  | 49      | 40.727   | P       | 0.200   | 0.187  |
| SMM  | 2006 | 45  | 0  | 49      | 41.846   | P       | 0.200   | -0.332 |
| HEC  | 2006 | 45  | 0  | 49      | 43.498   | P       | 0.200   | -0.033 |
| EDW2 | 2006 | 45  | 0  | 49      | 44.089   | P       | 0.200   | 0.022  |
| MPP  | 2006 | 45  | 0  | 49      | 45.364   | P       | 0.200   | 0.149  |
| OSI  | 2006 | 45  | 0  | 49      | 46.531   | P       | 0.200   | 0.170  |
| BBR  | 2006 | 45  | 0  | 49      | 48.054   | P       | 0.200   | 0.128  |
| BFS  | 2006 | 45  | 0  | 49      | 48.409   | P       | 0.200   | -0.091 |
| DEC  | 2006 | 45  | 0  | 49      | 48.509   | P       | 0.200   | -0.097 |
| LGU  | 2006 | 45  | 0  | 49      | 49.647   | P       | 0.200   | -0.385 |
| CIA  | 2006 | 45  | 0  | 49      | 54.187   | P       | 0.200   | -0.334 |
|      |      |     |    |         |          |         |         |        |
| 2006 | 181  | 2   | 43 | 36.4959 | 73.95500 | 8.82100 | 10.0000 | 145    |
| HUMO | 2006 | 181 | 2  | 53      | 37.221   | P       | 0.200   | -0.101 |

|      |      |     |   |    |        |   |       |        |
|------|------|-----|---|----|--------|---|-------|--------|
| L07A | 2006 | 181 | 2 | 53 | 37.288 | P | 0.200 | 0.402  |
| M07A | 2006 | 181 | 2 | 53 | 41.294 | P | 0.200 | 0.546  |
| M04C | 2006 | 181 | 2 | 53 | 41.576 | P | 0.200 | -0.170 |
| N08A | 2006 | 181 | 2 | 53 | 43.576 | P | 0.200 | -0.041 |
| M05C | 2006 | 181 | 2 | 53 | 43.683 | P | 0.200 | 0.118  |
| M06C | 2006 | 181 | 2 | 53 | 44.263 | P | 0.200 | 0.496  |
| N07B | 2006 | 181 | 2 | 53 | 44.792 | P | 0.200 | 0.151  |
| M03C | 2006 | 181 | 2 | 53 | 45.124 | P | 0.200 | -0.187 |
| O09A | 2006 | 181 | 2 | 53 | 46.221 | P | 0.200 | -0.062 |
| HATC | 2006 | 181 | 2 | 53 | 47.646 | P | 0.200 | 0.155  |
| O07A | 2006 | 181 | 2 | 53 | 48.769 | P | 0.200 | 0.221  |
| WDC  | 2006 | 181 | 2 | 53 | 49.352 | P | 0.200 | -0.954 |
| N02C | 2006 | 181 | 2 | 53 | 49.781 | P | 0.200 | -0.048 |
| O06A | 2006 | 181 | 2 | 53 | 50.030 | P | 0.200 | 0.305  |
| P09A | 2006 | 181 | 2 | 53 | 50.035 | P | 0.200 | -0.424 |
| O04C | 2006 | 181 | 2 | 53 | 50.360 | P | 0.200 | -0.085 |
| P10A | 2006 | 181 | 2 | 53 | 50.919 | P | 0.200 | 1.911  |
| BEK  | 2006 | 181 | 2 | 53 | 52.278 | P | 0.200 | -0.238 |
| O05C | 2006 | 181 | 2 | 53 | 52.459 | P | 0.200 | -0.102 |
| Q11A | 2006 | 181 | 2 | 53 | 52.554 | P | 0.200 | -0.383 |
| O02C | 2006 | 181 | 2 | 53 | 53.066 | P | 0.200 | -0.329 |
| ORV  | 2006 | 181 | 2 | 53 | 55.067 | P | 0.200 | -0.685 |
| Q08A | 2006 | 181 | 2 | 53 | 55.525 | P | 0.200 | -0.350 |
| WCN  | 2006 | 181 | 2 | 53 | 55.667 | P | 0.200 | 0.127  |
| P05C | 2006 | 181 | 2 | 53 | 56.245 | P | 0.200 | -0.293 |
| GASB | 2006 | 181 | 2 | 53 | 56.809 | P | 0.200 | 0.023  |
| SUTB | 2006 | 181 | 2 | 53 | 57.002 | P | 0.200 | -1.218 |
| R10A | 2006 | 181 | 2 | 53 | 57.375 | P | 0.200 | -0.079 |
| R09A | 2006 | 181 | 2 | 53 | 58.129 | P | 0.200 | -0.618 |
| MNV  | 2006 | 181 | 2 | 53 | 58.257 | P | 0.200 | -0.741 |
| P01C | 2006 | 181 | 2 | 53 | 58.477 | P | 0.200 | -0.178 |
| R08A | 2006 | 181 | 2 | 53 | 58.841 | P | 0.200 | -0.702 |
| TPH  | 2006 | 181 | 2 | 53 | 59.350 | P | 0.200 | -0.765 |
| LAVA | 2006 | 181 | 2 | 53 | 59.536 | P | 0.200 | -0.639 |
| R05C | 2006 | 181 | 2 | 53 | 59.737 | P | 0.200 | -0.215 |
| Q04C | 2006 | 181 | 2 | 54 | 0.138  | P | 0.200 | -0.204 |
| SN48 | 2006 | 181 | 2 | 54 | 1.149  | P | 0.200 | -0.130 |
| HOPS | 2006 | 181 | 2 | 54 | 1.459  | P | 0.200 | 0.101  |
| SN76 | 2006 | 181 | 2 | 54 | 1.536  | P | 0.200 | 0.226  |
| SN38 | 2006 | 181 | 2 | 54 | 1.545  | P | 0.200 | -0.220 |
| S09A | 2006 | 181 | 2 | 54 | 1.575  | P | 0.200 | -0.786 |
| SN67 | 2006 | 181 | 2 | 54 | 1.628  | P | 0.200 | 0.265  |
| MNRC | 2006 | 181 | 2 | 54 | 1.793  | P | 0.200 | 0.392  |
| SN85 | 2006 | 181 | 2 | 54 | 2.248  | P | 0.200 | -0.159 |
| SN66 | 2006 | 181 | 2 | 54 | 2.693  | P | 0.200 | 0.359  |
| R07C | 2006 | 181 | 2 | 54 | 2.804  | P | 0.200 | 0.367  |
| SN47 | 2006 | 181 | 2 | 54 | 2.898  | P | 0.200 | 0.169  |
| SN84 | 2006 | 181 | 2 | 54 | 3.026  | P | 0.200 | -0.360 |
| Q03C | 2006 | 181 | 2 | 54 | 3.164  | P | 0.200 | 0.671  |
| SN37 | 2006 | 181 | 2 | 54 | 3.765  | P | 0.200 | 0.244  |
| SN56 | 2006 | 181 | 2 | 54 | 3.857  | P | 0.200 | 0.402  |
| CMB  | 2006 | 181 | 2 | 54 | 3.967  | P | 0.200 | -0.447 |
| SN55 | 2006 | 181 | 2 | 54 | 4.676  | P | 0.200 | 0.423  |
| SN36 | 2006 | 181 | 2 | 54 | 4.810  | P | 0.200 | 0.247  |
| SN64 | 2006 | 181 | 2 | 54 | 4.872  | P | 0.200 | 0.135  |
| TPNV | 2006 | 181 | 2 | 54 | 5.070  | P | 0.200 | -0.940 |
| SN73 | 2006 | 181 | 2 | 54 | 5.233  | P | 0.200 | -0.190 |
| S08C | 2006 | 181 | 2 | 54 | 5.326  | P | 0.200 | 0.052  |
| SN54 | 2006 | 181 | 2 | 54 | 5.786  | P | 0.200 | 0.467  |
| SN16 | 2006 | 181 | 2 | 54 | 6.447  | P | 0.200 | 0.318  |
| SN71 | 2006 | 181 | 2 | 54 | 6.671  | P | 0.200 | -0.173 |
| GRA  | 2006 | 181 | 2 | 54 | 7.006  | P | 0.200 | 0.025  |
| SN44 | 2006 | 181 | 2 | 54 | 7.104  | P | 0.200 | 0.487  |

|      |      |     |   |    |        |   |       |        |
|------|------|-----|---|----|--------|---|-------|--------|
| SN25 | 2006 | 181 | 2 | 54 | 7.272  | P | 0.200 | 0.547  |
| BRIB | 2006 | 181 | 2 | 54 | 7.703  | P | 0.200 | 0.441  |
| BRK  | 2006 | 181 | 2 | 54 | 7.779  | P | 0.200 | 0.220  |
| SN15 | 2006 | 181 | 2 | 54 | 7.808  | P | 0.200 | 0.546  |
| SN34 | 2006 | 181 | 2 | 54 | 7.830  | P | 0.200 | 0.818  |
| SN52 | 2006 | 181 | 2 | 54 | 8.002  | P | 0.200 | 0.019  |
| SN43 | 2006 | 181 | 2 | 54 | 8.030  | P | 0.200 | 0.611  |
| SN24 | 2006 | 181 | 2 | 54 | 8.277  | P | 0.200 | 0.651  |
| S04C | 2006 | 181 | 2 | 54 | 9.005  | P | 0.200 | 0.174  |
| SN23 | 2006 | 181 | 2 | 54 | 9.443  | P | 0.200 | 0.573  |
| FUR  | 2006 | 181 | 2 | 54 | 9.529  | P | 0.200 | -0.141 |
| T06C | 2006 | 181 | 2 | 54 | 9.871  | P | 0.200 | -0.071 |
| SN21 | 2006 | 181 | 2 | 54 | 10.416 | P | 0.200 | -0.505 |
| JRSC | 2006 | 181 | 2 | 54 | 10.521 | P | 0.200 | -0.033 |
| MHC  | 2006 | 181 | 2 | 54 | 10.641 | P | 0.200 | 0.247  |
| SN11 | 2006 | 181 | 2 | 54 | 10.883 | P | 0.200 | -0.509 |
| HELL | 2006 | 181 | 2 | 54 | 11.435 | P | 0.200 | 0.176  |
| V11A | 2006 | 181 | 2 | 54 | 11.814 | P | 0.200 | -0.076 |
| CWC  | 2006 | 181 | 2 | 54 | 12.101 | P | 0.200 | 0.421  |
| PACP | 2006 | 181 | 2 | 54 | 12.538 | P | 0.200 | 0.580  |
| SHO  | 2006 | 181 | 2 | 54 | 12.812 | P | 0.200 | 0.272  |
| RCT  | 2006 | 181 | 2 | 54 | 13.257 | P | 0.200 | -0.655 |
| MPM  | 2006 | 181 | 2 | 54 | 13.611 | P | 0.200 | 0.137  |
| SAO  | 2006 | 181 | 2 | 54 | 13.843 | P | 0.200 | 0.201  |
| VES  | 2006 | 181 | 2 | 54 | 15.801 | P | 0.200 | -0.871 |
| HAST | 2006 | 181 | 2 | 54 | 16.208 | P | 0.200 | -0.103 |
| ISA  | 2006 | 181 | 2 | 54 | 16.946 | P | 0.200 | -0.070 |
| LRL  | 2006 | 181 | 2 | 54 | 17.230 | P | 0.200 | -0.010 |
| GSC  | 2006 | 181 | 2 | 54 | 17.254 | P | 0.200 | 0.022  |
| PKD  | 2006 | 181 | 2 | 54 | 18.124 | P | 0.200 | 0.199  |
| HEC  | 2006 | 181 | 2 | 54 | 19.458 | P | 0.200 | -0.108 |
| SMM  | 2006 | 181 | 2 | 54 | 20.824 | P | 0.200 | -0.206 |
| PHL  | 2006 | 181 | 2 | 54 | 21.170 | P | 0.200 | -0.079 |
| EDW2 | 2006 | 181 | 2 | 54 | 21.303 | P | 0.200 | 0.023  |
| BFS  | 2006 | 181 | 2 | 54 | 24.939 | P | 0.200 | -0.102 |
| CHF  | 2006 | 181 | 2 | 54 | 25.072 | P | 0.200 | 0.253  |
| MWC  | 2006 | 181 | 2 | 54 | 25.449 | P | 0.200 | -0.183 |

|      |      |     |    |         |          |          |         |        |        |
|------|------|-----|----|---------|----------|----------|---------|--------|--------|
| 2006 | 148  | 13  | 23 | 30.5382 | 74.08300 | 13.55800 | 10.0000 | 134    | -0.020 |
| K04A | 2006 | 148 | 13 | 33      | 34.964   | P        | 0.200   | 0.072  |        |
| HUMO | 2006 | 148 | 13 | 33      | 36.184   | P        | 0.200   | -0.040 |        |
| L04A | 2006 | 148 | 13 | 33      | 37.992   | P        | 0.200   | -0.029 |        |
| L02A | 2006 | 148 | 13 | 33      | 40.323   | P        | 0.200   | 0.379  |        |
| M04C | 2006 | 148 | 13 | 33      | 40.511   | P        | 0.200   | -0.243 |        |
| M07A | 2006 | 148 | 13 | 33      | 40.689   | P        | 0.200   | 0.615  |        |
| M05C | 2006 | 148 | 13 | 33      | 42.794   | P        | 0.200   | 0.131  |        |
| N08A | 2006 | 148 | 13 | 33      | 43.130   | P        | 0.200   | 0.079  |        |
| M06C | 2006 | 148 | 13 | 33      | 43.451   | P        | 0.200   | 0.506  |        |
| M03C | 2006 | 148 | 13 | 33      | 43.918   | P        | 0.200   | -0.381 |        |
| M02C | 2006 | 148 | 13 | 33      | 43.950   | P        | 0.200   | -0.350 |        |
| O09A | 2006 | 148 | 13 | 33      | 45.922   | P        | 0.200   | 0.096  |        |
| O08A | 2006 | 148 | 13 | 33      | 46.655   | P        | 0.200   | 0.305  |        |
| HATC | 2006 | 148 | 13 | 33      | 46.660   | P        | 0.200   | 0.114  |        |
| O07A | 2006 | 148 | 13 | 33      | 48.274   | P        | 0.200   | 0.382  |        |
| WDC  | 2006 | 148 | 13 | 33      | 48.284   | P        | 0.200   | -0.923 |        |
| N02C | 2006 | 148 | 13 | 33      | 48.577   | P        | 0.200   | -0.068 |        |
| O06A | 2006 | 148 | 13 | 33      | 49.324   | P        | 0.200   | 0.376  |        |
| O04C | 2006 | 148 | 13 | 33      | 49.459   | P        | 0.200   | -0.059 |        |
| P09A | 2006 | 148 | 13 | 33      | 49.779   | P        | 0.200   | -0.194 |        |
| P08A | 2006 | 148 | 13 | 33      | 50.437   | P        | 0.200   | 0.470  |        |
| O05C | 2006 | 148 | 13 | 33      | 51.472   | P        | 0.200   | -0.180 |        |
| BEK  | 2006 | 148 | 13 | 33      | 51.504   | P        | 0.200   | -0.165 |        |
| O03C | 2006 | 148 | 13 | 33      | 51.852   | P        | 0.200   | -0.694 |        |

|      |      |     |    |    |        |   |       |        |
|------|------|-----|----|----|--------|---|-------|--------|
| O02C | 2006 | 148 | 13 | 33 | 52.012 | P | 0.200 | -0.257 |
| P06A | 2006 | 148 | 13 | 33 | 52.353 | P | 0.200 | -0.038 |
| P07A | 2006 | 148 | 13 | 33 | 52.823 | P | 0.200 | 0.820  |
| ORV  | 2006 | 148 | 13 | 33 | 53.954 | P | 0.200 | -0.815 |
| Q09A | 2006 | 148 | 13 | 33 | 54.473 | P | 0.200 | -0.167 |
| WCN  | 2006 | 148 | 13 | 33 | 54.903 | P | 0.200 | 0.145  |
| Q08A | 2006 | 148 | 13 | 33 | 54.962 | P | 0.200 | -0.332 |
| P05C | 2006 | 148 | 13 | 33 | 55.481 | P | 0.200 | -0.168 |
| GASB | 2006 | 148 | 13 | 33 | 55.654 | P | 0.200 | 0.003  |
| SUTB | 2006 | 148 | 13 | 33 | 55.998 | P | 0.200 | -1.186 |
| Q07A | 2006 | 148 | 13 | 33 | 56.205 | P | 0.200 | 0.392  |
| P01C | 2006 | 148 | 13 | 33 | 57.495 | P | 0.200 | 0.060  |
| MNV  | 2006 | 148 | 13 | 33 | 57.808 | P | 0.200 | -0.563 |
| R08A | 2006 | 148 | 13 | 33 | 58.396 | P | 0.200 | -0.523 |
| LAVA | 2006 | 148 | 13 | 33 | 58.495 | P | 0.200 | -0.756 |
| TPH  | 2006 | 148 | 13 | 33 | 58.900 | P | 0.200 | -0.684 |
| R05C | 2006 | 148 | 13 | 33 | 58.972 | P | 0.200 | -0.130 |
| Q04C | 2006 | 148 | 13 | 33 | 59.225 | P | 0.200 | -0.119 |
| R06C | 2006 | 148 | 13 | 33 | 59.314 | P | 0.200 | -0.104 |
| SN48 | 2006 | 148 | 13 | 34 | 0.498  | P | 0.200 | -0.104 |
| SN76 | 2006 | 148 | 13 | 34 | 0.679  | P | 0.200 | 0.156  |
| SN67 | 2006 | 148 | 13 | 34 | 0.912  | P | 0.200 | 0.292  |
| SN38 | 2006 | 148 | 13 | 34 | 1.065  | P | 0.200 | -0.045 |
| S09A | 2006 | 148 | 13 | 34 | 1.166  | P | 0.200 | -0.664 |
| SN85 | 2006 | 148 | 13 | 34 | 1.288  | P | 0.200 | -0.284 |
| SN57 | 2006 | 148 | 13 | 34 | 1.599  | P | 0.200 | 0.338  |
| SN28 | 2006 | 148 | 13 | 34 | 1.781  | P | 0.200 | -0.020 |
| SN66 | 2006 | 148 | 13 | 34 | 1.852  | P | 0.200 | 0.284  |
| SN84 | 2006 | 148 | 13 | 34 | 2.041  | P | 0.200 | -0.492 |
| R07C | 2006 | 148 | 13 | 34 | 2.094  | P | 0.200 | 0.388  |
| Q03C | 2006 | 148 | 13 | 34 | 2.172  | P | 0.200 | 0.748  |
| SN47 | 2006 | 148 | 13 | 34 | 2.323  | P | 0.200 | 0.287  |
| R04C | 2006 | 148 | 13 | 34 | 2.443  | P | 0.200 | 0.006  |
| CMB  | 2006 | 148 | 13 | 34 | 2.951  | P | 0.200 | -0.580 |
| SN37 | 2006 | 148 | 13 | 34 | 3.157  | P | 0.200 | 0.311  |
| S06C | 2006 | 148 | 13 | 34 | 3.916  | P | 0.200 | 0.052  |
| SN55 | 2006 | 148 | 13 | 34 | 3.929  | P | 0.200 | 0.441  |
| SN64 | 2006 | 148 | 13 | 34 | 4.088  | P | 0.200 | 0.152  |
| SN36 | 2006 | 148 | 13 | 34 | 4.237  | P | 0.200 | 0.365  |
| SN46 | 2006 | 148 | 13 | 34 | 4.243  | P | 0.200 | 0.640  |
| SN73 | 2006 | 148 | 13 | 34 | 4.245  | P | 0.200 | -0.320 |
| TPNV | 2006 | 148 | 13 | 34 | 4.551  | P | 0.200 | -1.027 |
| BDM  | 2006 | 148 | 13 | 34 | 4.688  | P | 0.200 | -0.942 |
| S08C | 2006 | 148 | 13 | 34 | 4.753  | P | 0.200 | 0.119  |
| SN26 | 2006 | 148 | 13 | 34 | 4.914  | P | 0.200 | 0.645  |
| SN54 | 2006 | 148 | 13 | 34 | 4.964  | P | 0.200 | 0.429  |
| SN71 | 2006 | 148 | 13 | 34 | 5.695  | P | 0.200 | -0.255 |
| SN16 | 2006 | 148 | 13 | 34 | 5.810  | P | 0.200 | 0.324  |
| SN44 | 2006 | 148 | 13 | 34 | 6.355  | P | 0.200 | 0.503  |
| SN25 | 2006 | 148 | 13 | 34 | 6.684  | P | 0.200 | 0.658  |
| GRA  | 2006 | 148 | 13 | 34 | 6.711  | P | 0.200 | 0.291  |
| SN15 | 2006 | 148 | 13 | 34 | 7.080  | P | 0.200 | 0.508  |
| SN52 | 2006 | 148 | 13 | 34 | 7.187  | P | 0.200 | 0.035  |
| S05C | 2006 | 148 | 13 | 34 | 7.756  | P | 0.200 | 0.115  |
| TIN  | 2006 | 148 | 13 | 34 | 7.775  | P | 0.200 | 0.506  |
| S04C | 2006 | 148 | 13 | 34 | 7.869  | P | 0.200 | 0.034  |
| SN51 | 2006 | 148 | 13 | 34 | 8.041  | P | 0.200 | -0.055 |
| SN23 | 2006 | 148 | 13 | 34 | 8.691  | P | 0.200 | 0.583  |
| FUR  | 2006 | 148 | 13 | 34 | 8.927  | P | 0.200 | -0.220 |
| T06C | 2006 | 148 | 13 | 34 | 9.059  | P | 0.200 | -0.061 |
| SN21 | 2006 | 148 | 13 | 34 | 9.573  | P | 0.200 | -0.540 |
| MHC  | 2006 | 148 | 13 | 34 | 9.614  | P | 0.200 | 0.256  |
| SN11 | 2006 | 148 | 13 | 34 | 10.010 | P | 0.200 | -0.589 |

|      |      |     |    |    |        |   |       |        |
|------|------|-----|----|----|--------|---|-------|--------|
| HELL | 2006 | 148 | 13 | 34 | 10.694 | P | 0.200 | 0.193  |
| PACP | 2006 | 148 | 13 | 34 | 11.546 | P | 0.200 | 0.597  |
| SHO  | 2006 | 148 | 13 | 34 | 12.261 | P | 0.200 | 0.192  |
| RCT  | 2006 | 148 | 13 | 34 | 12.532 | P | 0.200 | -0.576 |
| SAO  | 2006 | 148 | 13 | 34 | 12.876 | P | 0.200 | 0.266  |
| MPM  | 2006 | 148 | 13 | 34 | 12.978 | P | 0.200 | 0.111  |
| TUQ  | 2006 | 148 | 13 | 34 | 14.408 | P | 0.200 | -0.212 |
| ISA  | 2006 | 148 | 13 | 34 | 16.291 | P | 0.200 | -0.004 |
| GSC  | 2006 | 148 | 13 | 34 | 16.676 | P | 0.200 | -0.018 |
| LRL  | 2006 | 148 | 13 | 34 | 16.759 | P | 0.200 | 0.152  |
| PKD  | 2006 | 148 | 13 | 34 | 17.091 | P | 0.200 | 0.115  |
| HEC  | 2006 | 148 | 13 | 34 | 18.969 | P | 0.200 | -0.096 |
| RRX  | 2006 | 148 | 13 | 34 | 19.781 | P | 0.200 | 0.292  |
| BBR  | 2006 | 148 | 13 | 34 | 23.362 | P | 0.200 | -0.008 |
| BFS  | 2006 | 148 | 13 | 34 | 24.185 | P | 0.200 | -0.184 |
| CHF  | 2006 | 148 | 13 | 34 | 24.380 | P | 0.200 | 0.263  |
| MWC  | 2006 | 148 | 13 | 34 | 24.800 | P | 0.200 | -0.122 |

|      |      |     |    |         |          |         |         |        |       |
|------|------|-----|----|---------|----------|---------|---------|--------|-------|
| 2006 | 211  | 7   | 16 | 56.7142 | 72.19000 | 0.83400 | 10.0000 | 203    | 0.001 |
| J05A | 2006 | 211 | 7  | 26      | 49.651   | P       | 0.200   | 1.107  |       |
| J03A | 2006 | 211 | 7  | 26      | 50.497   | P       | 0.200   | -0.061 |       |
| K04A | 2006 | 211 | 7  | 26      | 53.859   | P       | 0.200   | 0.125  |       |
| L07A | 2006 | 211 | 7  | 26      | 54.229   | P       | 0.200   | 0.235  |       |
| HUMO | 2006 | 211 | 7  | 26      | 55.390   | P       | 0.200   | -0.173 |       |
| K02A | 2006 | 211 | 7  | 26      | 55.687   | P       | 0.200   | 0.201  |       |
| L05A | 2006 | 211 | 7  | 26      | 56.868   | P       | 0.200   | 0.684  |       |
| L04A | 2006 | 211 | 7  | 26      | 56.872   | P       | 0.200   | -0.035 |       |
| M07A | 2006 | 211 | 7  | 26      | 58.182   | P       | 0.200   | 0.415  |       |
| M04C | 2006 | 211 | 7  | 26      | 59.441   | P       | 0.200   | -0.144 |       |
| L02A | 2006 | 211 | 7  | 26      | 59.862   | P       | 0.200   | 0.339  |       |
| N08A | 2006 | 211 | 7  | 27      | 0.155    | P       | 0.200   | -0.112 |       |
| M05C | 2006 | 211 | 7  | 27      | 1.256    | P       | 0.200   | 0.093  |       |
| M06C | 2006 | 211 | 7  | 27      | 1.626    | P       | 0.200   | 0.471  |       |
| N07B | 2006 | 211 | 7  | 27      | 1.671    | P       | 0.200   | 0.116  |       |
| YBH  | 2006 | 211 | 7  | 27      | 1.815    | P       | 0.200   | 0.785  |       |
| O09A | 2006 | 211 | 7  | 27      | 2.622    | P       | 0.200   | 0.000  |       |
| M03C | 2006 | 211 | 7  | 27      | 2.980    | P       | 0.200   | -0.213 |       |
| N06A | 2006 | 211 | 7  | 27      | 3.208    | P       | 0.200   | 0.098  |       |
| P09A | 2006 | 211 | 7  | 27      | 6.427    | P       | 0.200   | -0.282 |       |
| O06A | 2006 | 211 | 7  | 27      | 7.066    | P       | 0.200   | 0.240  |       |
| WDC  | 2006 | 211 | 7  | 27      | 7.323    | P       | 0.200   | -0.930 |       |
| N02C | 2006 | 211 | 7  | 27      | 7.948    | P       | 0.200   | -0.078 |       |
| Q11A | 2006 | 211 | 7  | 27      | 8.554    | P       | 0.200   | -0.146 |       |
| BEK  | 2006 | 211 | 7  | 27      | 9.549    | P       | 0.200   | -0.209 |       |
| O05C | 2006 | 211 | 7  | 27      | 9.903    | P       | 0.200   | -0.085 |       |
| P07A | 2006 | 211 | 7  | 27      | 10.093   | P       | 0.200   | 0.632  |       |
| P06A | 2006 | 211 | 7  | 27      | 10.148   | P       | 0.200   | -0.148 |       |
| Q09A | 2006 | 211 | 7  | 27      | 11.055   | P       | 0.200   | -0.321 |       |
| O02C | 2006 | 211 | 7  | 27      | 11.078   | P       | 0.200   | -0.304 |       |
| Q08A | 2006 | 211 | 7  | 27      | 11.954   | P       | 0.200   | -0.375 |       |
| ORV  | 2006 | 211 | 7  | 27      | 12.652   | P       | 0.200   | -0.663 |       |
| WCN  | 2006 | 211 | 7  | 27      | 12.718   | P       | 0.200   | 0.135  |       |
| R10A | 2006 | 211 | 7  | 27      | 13.432   | P       | 0.200   | 0.050  |       |
| Q07A | 2006 | 211 | 7  | 27      | 13.562   | P       | 0.200   | 0.333  |       |
| P05C | 2006 | 211 | 7  | 27      | 13.598   | P       | 0.200   | -0.227 |       |
| R09A | 2006 | 211 | 7  | 27      | 14.312   | P       | 0.200   | -0.588 |       |
| GASB | 2006 | 211 | 7  | 27      | 14.758   | P       | 0.200   | 0.038  |       |
| SUTB | 2006 | 211 | 7  | 27      | 14.796   | P       | 0.200   | -1.041 |       |
| TPH  | 2006 | 211 | 7  | 27      | 15.567   | P       | 0.200   | -0.738 |       |
| LAVA | 2006 | 211 | 7  | 27      | 16.788   | P       | 0.200   | -0.670 |       |
| R05C | 2006 | 211 | 7  | 27      | 16.839   | P       | 0.200   | -0.195 |       |
| S09A | 2006 | 211 | 7  | 27      | 17.820   | P       | 0.200   | -0.718 |       |
| SN85 | 2006 | 211 | 7  | 27      | 19.185   | P       | 0.200   | -0.248 |       |



|      |      |     |    |         |          |   |         |         |
|------|------|-----|----|---------|----------|---|---------|---------|
| SN76 | 2006 | 211 | 7  | 27      | 18.499   | P | 0.200   | 0.298   |
| SN84 | 2006 | 211 | 7  | 27      | 20.061   | P | 0.200   | -0.397  |
| SN56 | 2006 | 211 | 7  | 27      | 20.642   | P | 0.200   | 0.412   |
| SN74 | 2006 | 211 | 7  | 27      | 21.068   | P | 0.200   | -0.181  |
| SN55 | 2006 | 211 | 7  | 27      | 21.453   | P | 0.200   | 0.389   |
| R04C | 2006 | 211 | 7  | 27      | 20.641   | P | 0.200   | -0.056  |
| SN64 | 2006 | 211 | 7  | 27      | 21.890   | P | 0.200   | 0.248   |
| TPNV | 2006 | 211 | 7  | 27      | 20.980   | P | 0.200   | -0.869  |
| CMB  | 2006 | 211 | 7  | 27      | 21.014   | P | 0.200   | -0.539  |
| SN73 | 2006 | 211 | 7  | 27      | 22.235   | P | 0.200   | -0.227  |
| GRA  | 2006 | 211 | 7  | 27      | 21.348   | P | 0.200   | -1.806  |
| SN45 | 2006 | 211 | 7  | 27      | 22.418   | P | 0.200   | 0.394   |
| S08C | 2006 | 211 | 7  | 27      | 21.536   | P | 0.200   | -0.183  |
| SN54 | 2006 | 211 | 7  | 27      | 22.706   | P | 0.200   | 0.536   |
| S06C | 2006 | 211 | 7  | 27      | 21.752   | P | 0.200   | 0.112   |
| SN71 | 2006 | 211 | 7  | 27      | 23.796   | P | 0.200   | -0.156  |
| SN44 | 2006 | 211 | 7  | 27      | 23.991   | P | 0.200   | 0.609   |
| SN34 | 2006 | 211 | 7  | 27      | 24.346   | P | 0.200   | 0.649   |
| SN43 | 2006 | 211 | 7  | 27      | 24.821   | P | 0.200   | 0.583   |
| SN24 | 2006 | 211 | 7  | 27      | 24.909   | P | 0.200   | 0.624   |
| U11A | 2006 | 211 | 7  | 27      | 24.045   | P | 0.200   | 0.353   |
| SN52 | 2006 | 211 | 7  | 27      | 25.085   | P | 0.200   | 0.194   |
| SN51 | 2006 | 211 | 7  | 27      | 25.885   | P | 0.200   | -0.056  |
| U10A | 2006 | 211 | 7  | 27      | 25.125   | P | 0.200   | -0.155  |
| SN23 | 2006 | 211 | 7  | 27      | 26.286   | P | 0.200   | 0.706   |
| FUR  | 2006 | 211 | 7  | 27      | 25.392   | P | 0.200   | -0.263  |
| S05C | 2006 | 211 | 7  | 27      | 25.715   | P | 0.200   | 0.135   |
| SN21 | 2006 | 211 | 7  | 27      | 27.278   | P | 0.200   | -0.425  |
| S04C | 2006 | 211 | 7  | 27      | 26.341   | P | 0.200   | 0.157   |
| SN11 | 2006 | 211 | 7  | 27      | 27.628   | P | 0.200   | -0.489  |
| T06C | 2006 | 211 | 7  | 27      | 26.851   | P | 0.200   | 0.063   |
| V11A | 2006 | 211 | 7  | 27      | 27.521   | P | 0.200   | 0.103   |
| MHC  | 2006 | 211 | 7  | 27      | 28.258   | P | 0.200   | 0.426   |
| SHO  | 2006 | 211 | 7  | 27      | 28.421   | P | 0.200   | 0.107   |
| CWC  | 2006 | 211 | 7  | 27      | 28.470   | P | 0.200   | 0.457   |
| MPM  | 2006 | 211 | 7  | 27      | 29.734   | P | 0.200   | 0.112   |
| PACP | 2006 | 211 | 7  | 27      | 29.930   | P | 0.200   | 0.654   |
| RCT  | 2006 | 211 | 7  | 27      | 30.009   | P | 0.200   | -0.585  |
| SLA  | 2006 | 211 | 7  | 27      | 30.406   | P | 0.200   | 0.287   |
| SAO  | 2006 | 211 | 7  | 27      | 31.365   | P | 0.200   | 0.374   |
| VES  | 2006 | 211 | 7  | 27      | 32.278   | P | 0.200   | -1.002  |
| GSC  | 2006 | 211 | 7  | 27      | 33.236   | P | 0.200   | 0.100   |
| LRL  | 2006 | 211 | 7  | 27      | 33.378   | P | 0.200   | -0.044  |
| ISA  | 2006 | 211 | 7  | 27      | 33.435   | P | 0.200   | -0.005  |
| PKD  | 2006 | 211 | 7  | 27      | 35.031   | P | 0.200   | 0.061   |
| HEC  | 2006 | 211 | 7  | 27      | 35.328   | P | 0.200   | 0.013   |
| EDW2 | 2006 | 211 | 7  | 27      | 37.710   | P | 0.200   | 0.197   |
| BBR  | 2006 | 211 | 7  | 27      | 40.047   | P | 0.200   | 0.224   |
| VCS  | 2006 | 211 | 7  | 27      | 40.574   | P | 0.200   | 0.240   |
| SVD  | 2006 | 211 | 7  | 27      | 40.744   | P | 0.200   | -0.118  |
| MPP  | 2006 | 211 | 7  | 27      | 40.753   | P | 0.200   | 0.344   |
| BFS  | 2006 | 211 | 7  | 27      | 40.865   | P | 0.200   | -0.275  |
| CHF  | 2006 | 211 | 7  | 27      | 41.360   | P | 0.200   | 0.328   |
| MWC  | 2006 | 211 | 7  | 27      | 41.790   | P | 0.200   | -0.047  |
| 2007 | 69   | 17  | 3  | 39.6778 | 74.25600 |   | 8.71300 | 10.0000 |
| J05A | 2007 | 69  | 17 | 13      | 33.277   | P | 0.200   | 1.088   |
| J04A | 2007 | 69  | 17 | 13      | 33.816   | P | 0.200   | 0.143   |
| J02A | 2007 | 69  | 17 | 13      | 34.706   | P | 0.200   | 0.366   |
| DBO  | 2007 | 69  | 17 | 13      | 36.134   | P | 0.200   | 0.383   |
| K05A | 2007 | 69  | 17 | 13      | 36.695   | P | 0.200   | 1.033   |
| K04A | 2007 | 69  | 17 | 13      | 37.358   | P | 0.200   | 0.058   |
| HUMO | 2007 | 69  | 17 | 13      | 38.558   | P | 0.200   | -0.200  |
|      |      |     |    |         |          |   | 315     | -0.005  |

|      |      |    |    |    |        |   |       |        |
|------|------|----|----|----|--------|---|-------|--------|
| K02A | 2007 | 69 | 17 | 13 | 38.772 | P | 0.200 | 0.283  |
| L07A | 2007 | 69 | 17 | 13 | 38.792 | P | 0.200 | 0.408  |
| L04A | 2007 | 69 | 17 | 13 | 40.420 | P | 0.200 | -0.046 |
| L05A | 2007 | 69 | 17 | 13 | 40.760 | P | 0.200 | 0.660  |
| M07A | 2007 | 69 | 17 | 13 | 42.866 | P | 0.200 | 0.599  |
| L02A | 2007 | 69 | 17 | 13 | 42.882 | P | 0.200 | 0.311  |
| M04C | 2007 | 69 | 17 | 13 | 42.998 | P | 0.200 | -0.215 |
| YBH  | 2007 | 69 | 17 | 13 | 43.707 | P | 0.200 | -0.679 |
| N08A | 2007 | 69 | 17 | 13 | 45.128 | P | 0.200 | -0.037 |
| M05C | 2007 | 69 | 17 | 13 | 45.225 | P | 0.200 | 0.171  |
| M06C | 2007 | 69 | 17 | 13 | 45.819 | P | 0.200 | 0.544  |
| N07B | 2007 | 69 | 17 | 13 | 46.381 | P | 0.200 | 0.200  |
| M03C | 2007 | 69 | 17 | 13 | 46.554 | P | 0.200 | -0.242 |
| M02C | 2007 | 69 | 17 | 13 | 46.609 | P | 0.200 | -0.262 |
| N06A | 2007 | 69 | 17 | 13 | 47.550 | P | 0.200 | 0.078  |
| O09A | 2007 | 69 | 17 | 13 | 47.803 | P | 0.200 | -0.062 |
| O08A | 2007 | 69 | 17 | 13 | 48.677 | P | 0.200 | 0.198  |
| HATC | 2007 | 69 | 17 | 13 | 49.146 | P | 0.200 | 0.156  |
| ELFS | 2007 | 69 | 17 | 13 | 49.798 | P | 0.200 | 0.227  |
| O07A | 2007 | 69 | 17 | 13 | 50.324 | P | 0.200 | 0.227  |
| WDC  | 2007 | 69 | 17 | 13 | 50.842 | P | 0.200 | -0.950 |
| N02C | 2007 | 69 | 17 | 13 | 51.255 | P | 0.200 | -0.040 |
| P09A | 2007 | 69 | 17 | 13 | 51.732 | P | 0.200 | -0.319 |
| SNF9 | 2007 | 69 | 17 | 13 | 51.837 | P | 0.200 | -0.226 |
| O04C | 2007 | 69 | 17 | 13 | 51.927 | P | 0.200 | -0.032 |
| P08A | 2007 | 69 | 17 | 13 | 52.477 | P | 0.200 | 0.350  |
| P10A | 2007 | 69 | 17 | 13 | 52.626 | P | 0.200 | 2.016  |
| SNE9 | 2007 | 69 | 17 | 13 | 52.854 | P | 0.200 | 0.069  |
| SNF8 | 2007 | 69 | 17 | 13 | 53.366 | P | 0.200 | -0.143 |
| SNG7 | 2007 | 69 | 17 | 13 | 53.428 | P | 0.200 | -0.006 |
| BEK  | 2007 | 69 | 17 | 13 | 53.866 | P | 0.200 | -0.191 |
| O05C | 2007 | 69 | 17 | 13 | 53.987 | P | 0.200 | -0.102 |
| SND9 | 2007 | 69 | 17 | 13 | 54.045 | P | 0.200 | 0.172  |
| O03C | 2007 | 69 | 17 | 13 | 54.281 | P | 0.200 | -0.819 |
| Q11A | 2007 | 69 | 17 | 13 | 54.292 | P | 0.200 | -0.284 |
| O02C | 2007 | 69 | 17 | 13 | 54.612 | P | 0.200 | -0.279 |
| P06A | 2007 | 69 | 17 | 13 | 54.727 | P | 0.200 | -0.010 |
| P07A | 2007 | 69 | 17 | 13 | 54.901 | P | 0.200 | 0.647  |
| SND8 | 2007 | 69 | 17 | 13 | 55.126 | P | 0.200 | -0.265 |
| SNF6 | 2007 | 69 | 17 | 13 | 55.502 | P | 0.200 | -0.604 |
| SNG5 | 2007 | 69 | 17 | 13 | 55.646 | P | 0.200 | -0.774 |
| Q10A | 2007 | 69 | 17 | 13 | 55.684 | P | 0.200 | -0.016 |
| SND7 | 2007 | 69 | 17 | 13 | 55.685 | P | 0.200 | -0.292 |
| SNC8 | 2007 | 69 | 17 | 13 | 56.265 | P | 0.200 | -0.084 |
| Q09A | 2007 | 69 | 17 | 13 | 56.514 | P | 0.200 | -0.237 |
| O01C | 2007 | 69 | 17 | 13 | 56.537 | P | 0.200 | 0.252  |
| SNB9 | 2007 | 69 | 17 | 13 | 56.537 | P | 0.200 | 0.021  |
| ORV  | 2007 | 69 | 17 | 13 | 56.546 | P | 0.200 | -0.737 |
| SNE6 | 2007 | 69 | 17 | 13 | 56.688 | P | 0.200 | -0.471 |
| SNE5 | 2007 | 69 | 17 | 13 | 57.052 | P | 0.200 | -1.056 |
| Q08A | 2007 | 69 | 17 | 13 | 57.175 | P | 0.200 | -0.300 |
| WCN  | 2007 | 69 | 17 | 13 | 57.178 | P | 0.200 | 0.076  |
| R11A | 2007 | 69 | 17 | 13 | 57.206 | P | 0.200 | -0.565 |
| SNC7 | 2007 | 69 | 17 | 13 | 57.540 | P | 0.200 | -0.362 |
| P05C | 2007 | 69 | 17 | 13 | 57.843 | P | 0.200 | -0.243 |
| SND5 | 2007 | 69 | 17 | 13 | 58.259 | P | 0.200 | -0.792 |
| GASB | 2007 | 69 | 17 | 13 | 58.317 | P | 0.200 | 0.024  |
| SNA8 | 2007 | 69 | 17 | 13 | 58.331 | P | 0.200 | 0.060  |
| SNE4 | 2007 | 69 | 17 | 13 | 58.497 | P | 0.200 | -0.758 |
| SUTB | 2007 | 69 | 17 | 13 | 58.534 | P | 0.200 | -1.214 |
| SNC6 | 2007 | 69 | 17 | 13 | 59.069 | P | 0.200 | -0.236 |
| R10A | 2007 | 69 | 17 | 13 | 59.115 | P | 0.200 | 0.022  |
| SNB7 | 2007 | 69 | 17 | 13 | 59.174 | P | 0.200 | -0.042 |

|      |      |    |    |    |        |   |       |        |
|------|------|----|----|----|--------|---|-------|--------|
| SN98 | 2007 | 69 | 17 | 13 | 59.266 | P | 0.200 | 0.117  |
| SNA7 | 2007 | 69 | 17 | 13 | 59.331 | P | 0.200 | 0.048  |
| SND4 | 2007 | 69 | 17 | 13 | 59.433 | P | 0.200 | -0.850 |
| SNC5 | 2007 | 69 | 17 | 13 | 59.479 | P | 0.200 | -0.413 |
| R09A | 2007 | 69 | 17 | 13 | 59.757 | P | 0.200 | -0.617 |
| P01C | 2007 | 69 | 17 | 14 | 0.081  | P | 0.200 | -0.076 |
| SNB6 | 2007 | 69 | 17 | 14 | 0.312  | P | 0.200 | -0.185 |
| SN97 | 2007 | 69 | 17 | 14 | 0.372  | P | 0.200 | 0.045  |
| SNC4 | 2007 | 69 | 17 | 14 | 0.447  | P | 0.200 | -0.834 |
| R08A | 2007 | 69 | 17 | 14 | 0.500  | P | 0.200 | -0.651 |
| LAVA | 2007 | 69 | 17 | 14 | 1.144  | P | 0.200 | -0.588 |
| S10A | 2007 | 69 | 17 | 14 | 1.189  | P | 0.200 | -0.660 |
| R05C | 2007 | 69 | 17 | 14 | 1.356  | P | 0.200 | -0.166 |
| Q04C | 2007 | 69 | 17 | 14 | 1.685  | P | 0.200 | -0.206 |
| SNA5 | 2007 | 69 | 17 | 14 | 1.767  | P | 0.200 | -0.285 |
| R06C | 2007 | 69 | 17 | 14 | 1.894  | P | 0.200 | 0.115  |
| SNB3 | 2007 | 69 | 17 | 14 | 2.617  | P | 0.200 | -0.505 |
| SNA4 | 2007 | 69 | 17 | 14 | 2.643  | P | 0.200 | -0.593 |
| SN96 | 2007 | 69 | 17 | 14 | 2.750  | P | 0.200 | -0.070 |
| MNRC | 2007 | 69 | 17 | 14 | 3.173  | P | 0.200 | 0.239  |
| S09A | 2007 | 69 | 17 | 14 | 3.263  | P | 0.200 | -0.741 |
| SNA3 | 2007 | 69 | 17 | 14 | 3.588  | P | 0.200 | -0.551 |
| SN95 | 2007 | 69 | 17 | 14 | 3.689  | P | 0.200 | -0.312 |
| SN85 | 2007 | 69 | 17 | 14 | 3.721  | P | 0.200 | -0.271 |
| R07C | 2007 | 69 | 17 | 14 | 4.353  | P | 0.200 | 0.313  |
| T11A | 2007 | 69 | 17 | 14 | 4.525  | P | 0.200 | 0.070  |
| SN84 | 2007 | 69 | 17 | 14 | 4.607  | P | 0.200 | -0.364 |
| Q03C | 2007 | 69 | 17 | 14 | 4.706  | P | 0.200 | 0.667  |
| SN75 | 2007 | 69 | 17 | 14 | 4.736  | P | 0.200 | 0.014  |
| R04C | 2007 | 69 | 17 | 14 | 4.933  | P | 0.200 | -0.017 |
| SN93 | 2007 | 69 | 17 | 14 | 5.201  | P | 0.200 | -0.093 |
| CMB  | 2007 | 69 | 17 | 14 | 5.547  | P | 0.200 | -0.449 |
| SN74 | 2007 | 69 | 17 | 14 | 5.596  | P | 0.200 | -0.240 |
| SN65 | 2007 | 69 | 17 | 14 | 5.610  | P | 0.200 | 0.269  |
| S06C | 2007 | 69 | 17 | 14 | 6.314  | P | 0.200 | 0.039  |
| SN55 | 2007 | 69 | 17 | 14 | 6.326  | P | 0.200 | 0.472  |
| CVS  | 2007 | 69 | 17 | 14 | 6.415  | P | 0.200 | 0.095  |
| SN64 | 2007 | 69 | 17 | 14 | 6.517  | P | 0.200 | 0.185  |
| TPNV | 2007 | 69 | 17 | 14 | 6.792  | P | 0.200 | -0.888 |
| S08C | 2007 | 69 | 17 | 14 | 7.003  | P | 0.200 | 0.102  |
| MLAC | 2007 | 69 | 17 | 14 | 7.510  | P | 0.200 | 0.761  |
| SN63 | 2007 | 69 | 17 | 14 | 7.541  | P | 0.200 | 0.136  |
| GRA  | 2007 | 69 | 17 | 14 | 8.807  | P | 0.200 | 0.178  |
| BDM  | 2007 | 69 | 17 | 14 | 8.936  | P | 0.200 | 0.689  |
| BRIB | 2007 | 69 | 17 | 14 | 9.159  | P | 0.200 | 0.344  |
| SN34 | 2007 | 69 | 17 | 14 | 9.346  | P | 0.200 | 0.722  |
| BRK  | 2007 | 69 | 17 | 14 | 9.384  | P | 0.200 | 0.275  |
| BKS  | 2007 | 69 | 17 | 14 | 9.436  | P | 0.200 | 0.383  |
| U11A | 2007 | 69 | 17 | 14 | 9.968  | P | 0.200 | 0.128  |
| TIN  | 2007 | 69 | 17 | 14 | 10.152 | P | 0.200 | 0.597  |
| S05C | 2007 | 69 | 17 | 14 | 10.177 | P | 0.200 | 0.059  |
| SN14 | 2007 | 69 | 17 | 14 | 10.499 | P | 0.200 | 0.419  |
| S04C | 2007 | 69 | 17 | 14 | 10.533 | P | 0.200 | 0.129  |
| WENL | 2007 | 69 | 17 | 14 | 10.649 | P | 0.200 | 0.503  |
| FARB | 2007 | 69 | 17 | 14 | 10.852 | P | 0.200 | -0.337 |
| T06C | 2007 | 69 | 17 | 14 | 11.534 | P | 0.200 | -0.019 |
| SN12 | 2007 | 69 | 17 | 14 | 11.947 | P | 0.200 | 0.443  |
| JRSC | 2007 | 69 | 17 | 14 | 12.087 | P | 0.200 | -0.030 |
| MHC  | 2007 | 69 | 17 | 14 | 12.267 | P | 0.200 | 0.300  |
| U10A | 2007 | 69 | 17 | 14 | 12.853 | P | 0.200 | 1.718  |
| HELL | 2007 | 69 | 17 | 14 | 13.117 | P | 0.200 | 0.230  |
| V11A | 2007 | 69 | 17 | 14 | 13.624 | P | 0.200 | 0.026  |
| BNLO | 2007 | 69 | 17 | 14 | 13.760 | P | 0.200 | -0.252 |

|      |      |    |    |    |        |   |       |        |
|------|------|----|----|----|--------|---|-------|--------|
| CWC  | 2007 | 69 | 17 | 14 | 13.903 | P | 0.200 | 0.573  |
| PACP | 2007 | 69 | 17 | 14 | 14.128 | P | 0.200 | 0.583  |
| SHO  | 2007 | 69 | 17 | 14 | 14.506 | P | 0.200 | 0.274  |
| RCT  | 2007 | 69 | 17 | 14 | 14.944 | P | 0.200 | -0.603 |
| MPM  | 2007 | 69 | 17 | 14 | 15.281 | P | 0.200 | 0.138  |
| SAO  | 2007 | 69 | 17 | 14 | 15.486 | P | 0.200 | 0.251  |
| TUQ  | 2007 | 69 | 17 | 14 | 16.844 | P | 0.200 | 0.071  |
| U05C | 2007 | 69 | 17 | 14 | 17.145 | P | 0.200 | 0.870  |
| HAST | 2007 | 69 | 17 | 14 | 17.907 | P | 0.200 | -0.004 |
| ISA  | 2007 | 69 | 17 | 14 | 18.659 | P | 0.200 | -0.020 |
| GSC  | 2007 | 69 | 17 | 14 | 19.002 | P | 0.200 | 0.071  |
| LRL  | 2007 | 69 | 17 | 14 | 19.060 | P | 0.200 | 0.141  |
| V05C | 2007 | 69 | 17 | 14 | 19.509 | P | 0.200 | 0.355  |
| PKD  | 2007 | 69 | 17 | 14 | 19.698 | P | 0.200 | 0.149  |
| V03C | 2007 | 69 | 17 | 14 | 20.061 | P | 0.200 | 0.283  |
| HEC  | 2007 | 69 | 17 | 14 | 21.224 | P | 0.200 | -0.056 |
| V04C | 2007 | 69 | 17 | 14 | 21.959 | P | 0.200 | 0.109  |
| RRX  | 2007 | 69 | 17 | 14 | 22.047 | P | 0.200 | 0.280  |
| PHL  | 2007 | 69 | 17 | 14 | 22.756 | P | 0.200 | -0.123 |
| EDW2 | 2007 | 69 | 17 | 14 | 23.141 | P | 0.200 | 0.178  |
| VTV  | 2007 | 69 | 17 | 14 | 24.407 | P | 0.200 | 0.168  |
| ADO  | 2007 | 69 | 17 | 14 | 24.905 | P | 0.200 | 0.550  |
| MPP  | 2007 | 69 | 17 | 14 | 25.677 | P | 0.200 | 0.367  |
| BBR  | 2007 | 69 | 17 | 14 | 25.803 | P | 0.200 | 0.142  |
| OSI  | 2007 | 69 | 17 | 14 | 25.940 | P | 0.200 | 0.412  |
| VCS  | 2007 | 69 | 17 | 14 | 26.047 | P | 0.200 | 0.271  |
| BFS  | 2007 | 69 | 17 | 14 | 26.597 | P | 0.200 | -0.148 |
| SVD  | 2007 | 69 | 17 | 14 | 26.657 | P | 0.200 | -0.005 |
| CHF  | 2007 | 69 | 17 | 14 | 26.822 | P | 0.200 | 0.303  |
| MWC  | 2007 | 69 | 17 | 14 | 27.250 | P | 0.200 | -0.083 |
| DEC  | 2007 | 69 | 17 | 14 | 27.262 | P | 0.200 | -0.053 |
| PASC | 2007 | 69 | 17 | 14 | 27.387 | P | 0.200 | -0.144 |
| DJJ  | 2007 | 69 | 17 | 14 | 28.085 | P | 0.200 | -0.355 |
| LGU  | 2007 | 69 | 17 | 14 | 28.837 | P | 0.200 | -0.249 |
| RPV  | 2007 | 69 | 17 | 14 | 30.081 | P | 0.200 | -0.404 |
| FMP  | 2007 | 69 | 17 | 14 | 30.185 | P | 0.200 | -0.420 |
| SCZ2 | 2007 | 69 | 17 | 14 | 30.395 | P | 0.200 | -0.098 |
| CIA  | 2007 | 69 | 17 | 14 | 32.665 | P | 0.200 | 0.002  |

|      |     |    |    |         |          |         |         |     |       |
|------|-----|----|----|---------|----------|---------|---------|-----|-------|
| 1988 | 221 | 19 | 59 | 34.0618 | 63.52000 | 2.38800 | 10.0000 | 421 | 0.000 |
|------|-----|----|----|---------|----------|---------|---------|-----|-------|

|     |      |     |    |    |        |   |       |        |
|-----|------|-----|----|----|--------|---|-------|--------|
| arc | 1988 | 221 | 20 | 10 | 47.400 | P | 0.200 | 0.053  |
| bmd | 1988 | 221 | 20 | 10 | 47.750 | P | 0.200 | -0.341 |
| pmt | 1988 | 221 | 20 | 10 | 46.910 | P | 0.200 | -0.019 |
| cou | 1988 | 221 | 20 | 10 | 45.320 | P | 0.200 | -0.127 |
| twr | 1988 | 221 | 20 | 10 | 45.520 | P | 0.200 | -0.043 |
| WCX | 1988 | 221 | 20 | 10 | 47.070 | P | 0.200 | -0.206 |
| WHS | 1988 | 221 | 20 | 10 | 45.450 | P | 0.200 | -0.035 |
| WBS | 1988 | 221 | 20 | 10 | 49.570 | P | 0.200 | -0.011 |
| WRC | 1988 | 221 | 20 | 10 | 45.980 | P | 0.200 | -0.206 |
| WLH | 1988 | 221 | 20 | 10 | 46.610 | P | 0.200 | -0.035 |
| WCS | 1988 | 221 | 20 | 10 | 45.840 | P | 0.200 | -0.068 |
| WCH | 1988 | 221 | 20 | 10 | 47.610 | P | 0.200 | 0.067  |
| CLC | 1988 | 221 | 20 | 10 | 47.600 | P | 0.200 | 0.906  |
| XMS | 1988 | 221 | 20 | 10 | 48.150 | P | 0.200 | 0.347  |
| WBM | 1988 | 221 | 20 | 10 | 48.200 | P | 0.200 | -0.282 |

|      |     |   |    |         |          |           |         |   |       |
|------|-----|---|----|---------|----------|-----------|---------|---|-------|
| 2005 | 159 | 4 | 25 | 14.6070 | 62.00600 | -26.54100 | 10.0000 | 1 | 0.002 |
|------|-----|---|----|---------|----------|-----------|---------|---|-------|

|      |      |     |   |    |        |   |       |        |
|------|------|-----|---|----|--------|---|-------|--------|
| YBH  | 2005 | 159 | 4 | 34 | 57.318 | P | 0.200 | -1.512 |
| O04C | 2005 | 159 | 4 | 35 | 2.232  | P | 0.200 | -0.200 |
| WDC  | 2005 | 159 | 4 | 35 | 3.502  | P | 0.200 | -1.524 |
| TPH  | 2005 | 159 | 4 | 35 | 3.656  | P | 0.200 | -0.107 |
| O05C | 2005 | 159 | 4 | 35 | 3.730  | P | 0.200 | -0.235 |
| MNV  | 2005 | 159 | 4 | 35 | 4.534  | P | 0.200 | 0.002  |

|      |      |     |   |    |        |   |       |        |
|------|------|-----|---|----|--------|---|-------|--------|
| P05C | 2005 | 159 | 4 | 35 | 6.715  | P | 0.200 | -0.251 |
| SN48 | 2005 | 159 | 4 | 35 | 7.074  | P | 0.200 | -0.246 |
| SN38 | 2005 | 159 | 4 | 35 | 7.133  | P | 0.200 | -0.265 |
| ORV  | 2005 | 159 | 4 | 35 | 7.170  | P | 0.200 | -0.733 |
| SN28 | 2005 | 159 | 4 | 35 | 7.590  | P | 0.200 | -0.064 |
| SN47 | 2005 | 159 | 4 | 35 | 9.154  | P | 0.200 | 0.180  |
| SUTB | 2005 | 159 | 4 | 35 | 9.327  | P | 0.200 | -1.300 |
| SN37 | 2005 | 159 | 4 | 35 | 9.347  | P | 0.200 | 0.028  |
| LAVA | 2005 | 159 | 4 | 35 | 9.867  | P | 0.200 | -0.602 |
| GRA  | 2005 | 159 | 4 | 35 | 10.666 | P | 0.200 | 0.402  |
| Q04C | 2005 | 159 | 4 | 35 | 11.536 | P | 0.200 | -0.252 |
| FUR  | 2005 | 159 | 4 | 35 | 12.100 | P | 0.200 | 0.350  |
| CMB  | 2005 | 159 | 4 | 35 | 13.162 | P | 0.200 | -0.457 |
| SHO  | 2005 | 159 | 4 | 35 | 13.586 | P | 0.200 | 0.360  |
| TUQ  | 2005 | 159 | 4 | 35 | 15.094 | P | 0.200 | 0.167  |
| SN62 | 2005 | 159 | 4 | 35 | 15.312 | P | 0.200 | 0.359  |
| SN71 | 2005 | 159 | 4 | 35 | 15.950 | P | 0.200 | 0.099  |
| CWC  | 2005 | 159 | 4 | 35 | 16.299 | P | 0.200 | 0.444  |
| SN42 | 2005 | 159 | 4 | 35 | 16.365 | P | 0.200 | 0.562  |
| MPM  | 2005 | 159 | 4 | 35 | 16.708 | P | 0.200 | 0.286  |
| SN51 | 2005 | 159 | 4 | 35 | 17.423 | P | 0.200 | 0.316  |
| SN21 | 2005 | 159 | 4 | 35 | 17.493 | P | 0.200 | -0.346 |
| SN11 | 2005 | 159 | 4 | 35 | 17.538 | P | 0.200 | -0.377 |
| S05C | 2005 | 159 | 4 | 35 | 17.648 | P | 0.200 | 0.462  |
| T06C | 2005 | 159 | 4 | 35 | 17.700 | P | 0.200 | 0.391  |
| HELL | 2005 | 159 | 4 | 35 | 17.723 | P | 0.200 | 0.487  |
| CVS  | 2005 | 159 | 4 | 35 | 18.222 | P | 0.200 | 0.442  |
| GSC  | 2005 | 159 | 4 | 35 | 18.948 | P | 0.200 | 0.426  |
| HEC  | 2005 | 159 | 4 | 35 | 20.136 | P | 0.200 | 0.316  |
| WENL | 2005 | 159 | 4 | 35 | 20.750 | P | 0.200 | 0.807  |
| VES  | 2005 | 159 | 4 | 35 | 21.773 | P | 0.200 | -0.511 |
| ISA  | 2005 | 159 | 4 | 35 | 22.105 | P | 0.200 | 0.599  |
| PACP | 2005 | 159 | 4 | 35 | 23.015 | P | 0.200 | 0.913  |
| EDW2 | 2005 | 159 | 4 | 35 | 24.962 | P | 0.200 | 0.448  |
| PKD  | 2005 | 159 | 4 | 35 | 26.288 | P | 0.200 | 0.145  |
| BFS  | 2005 | 159 | 4 | 35 | 27.343 | P | 0.200 | -0.005 |

|      |      |     |    |         |          |          |        |        |        |
|------|------|-----|----|---------|----------|----------|--------|--------|--------|
| 2005 | 191  | 13  | 10 | 12.3327 | 42.38900 | 19.81200 | 4.4000 | 7      | -0.012 |
| HUMO | 2005 | 191 | 13 | 23      | 7.567    | P        | 0.200  | -0.418 |        |
| M06C | 2005 | 191 | 13 | 23      | 10.385   | P        | 0.200  | 0.360  |        |
| HATC | 2005 | 191 | 13 | 23      | 13.316   | P        | 0.200  | 0.133  |        |
| O04C | 2005 | 191 | 13 | 23      | 14.549   | P        | 0.200  | -0.235 |        |
| WDC  | 2005 | 191 | 13 | 23      | 14.638   | P        | 0.200  | -1.174 |        |
| O05C | 2005 | 191 | 13 | 23      | 15.744   | P        | 0.200  | -0.149 |        |
| TPH  | 2005 | 191 | 13 | 23      | 16.480   | P        | 0.200  | -0.706 |        |
| ORV  | 2005 | 191 | 13 | 23      | 17.588   | P        | 0.200  | -0.840 |        |
| P05C | 2005 | 191 | 13 | 23      | 17.880   | P        | 0.200  | -0.298 |        |
| SUTB | 2005 | 191 | 13 | 23      | 19.048   | P        | 0.200  | -1.095 |        |
| SN48 | 2005 | 191 | 13 | 23      | 19.376   | P        | 0.200  | 0.143  |        |
| SN38 | 2005 | 191 | 13 | 23      | 19.483   | P        | 0.200  | 0.183  |        |
| SN28 | 2005 | 191 | 13 | 23      | 19.655   | P        | 0.200  | 0.107  |        |
| LAVA | 2005 | 191 | 13 | 23      | 19.993   | P        | 0.200  | -0.620 |        |
| SN67 | 2005 | 191 | 13 | 23      | 20.314   | P        | 0.200  | 0.450  |        |
| SN57 | 2005 | 191 | 13 | 23      | 20.707   | P        | 0.200  | 0.638  |        |
| SN47 | 2005 | 191 | 13 | 23      | 20.845   | P        | 0.200  | 0.470  |        |
| SN37 | 2005 | 191 | 13 | 23      | 21.125   | P        | 0.200  | 0.532  |        |
| Q04C | 2005 | 191 | 13 | 23      | 21.172   | P        | 0.200  | -0.016 |        |
| GRA  | 2005 | 191 | 13 | 23      | 21.869   | P        | 0.200  | 0.355  |        |
| SN26 | 2005 | 191 | 13 | 23      | 21.958   | P        | 0.200  | 0.527  |        |
| CMB  | 2005 | 191 | 13 | 23      | 22.630   | P        | 0.200  | -0.291 |        |
| FUR  | 2005 | 191 | 13 | 23      | 22.890   | P        | 0.200  | 0.277  |        |
| R04C | 2005 | 191 | 13 | 23      | 22.912   | P        | 0.200  | 0.269  |        |
| SN62 | 2005 | 191 | 13 | 23      | 24.031   | P        | 0.200  | 0.084  |        |

|      |      |     |    |    |        |   |       |        |
|------|------|-----|----|----|--------|---|-------|--------|
| SN53 | 2005 | 191 | 13 | 23 | 24.105 | P | 0.200 | 0.245  |
| SHO  | 2005 | 191 | 13 | 23 | 24.127 | P | 0.200 | 0.341  |
| SN71 | 2005 | 191 | 13 | 23 | 24.156 | P | 0.200 | -0.332 |
| SN52 | 2005 | 191 | 13 | 23 | 24.494 | P | 0.200 | -0.060 |
| SN42 | 2005 | 191 | 13 | 23 | 24.817 | P | 0.200 | 0.072  |
| SN23 | 2005 | 191 | 13 | 23 | 24.918 | P | 0.200 | 0.283  |
| TUQ  | 2005 | 191 | 13 | 23 | 25.183 | P | 0.200 | 0.148  |
| CWC  | 2005 | 191 | 13 | 23 | 25.362 | P | 0.200 | 0.128  |
| SN51 | 2005 | 191 | 13 | 23 | 25.434 | P | 0.200 | -0.029 |
| S05C | 2005 | 191 | 13 | 23 | 25.479 | P | 0.200 | 0.121  |
| SN11 | 2005 | 191 | 13 | 23 | 25.502 | P | 0.200 | -0.684 |
| T06C | 2005 | 191 | 13 | 23 | 25.666 | P | 0.200 | -0.001 |
| MPM  | 2005 | 191 | 13 | 23 | 25.842 | P | 0.200 | -0.046 |
| HELL | 2005 | 191 | 13 | 23 | 25.861 | P | 0.200 | -0.012 |
| S04C | 2005 | 191 | 13 | 23 | 26.444 | P | 0.200 | -0.092 |
| WENL | 2005 | 191 | 13 | 23 | 27.088 | P | 0.200 | 0.335  |
| GSC  | 2005 | 191 | 13 | 23 | 27.408 | P | 0.200 | -0.016 |
| HEC  | 2005 | 191 | 13 | 23 | 28.223 | P | 0.200 | -0.210 |
| LRL  | 2005 | 191 | 13 | 23 | 28.407 | P | 0.200 | 0.047  |
| ISA  | 2005 | 191 | 13 | 23 | 29.044 | P | 0.200 | 0.055  |
| PACP | 2005 | 191 | 13 | 23 | 29.099 | P | 0.200 | 0.640  |
| BNLO | 2005 | 191 | 13 | 23 | 29.340 | P | 0.200 | -0.311 |
| EDW2 | 2005 | 191 | 13 | 23 | 31.422 | P | 0.200 | 0.233  |
| PKD  | 2005 | 191 | 13 | 23 | 31.569 | P | 0.200 | -0.145 |
| BBR  | 2005 | 191 | 13 | 23 | 31.840 | P | 0.200 | -0.036 |
| MPP  | 2005 | 191 | 13 | 23 | 35.228 | P | 0.200 | 0.642  |

|      |      |    |    |         |          |           |         |        |        |
|------|------|----|----|---------|----------|-----------|---------|--------|--------|
| 2006 | 41   | 13 | 22 | 19.9038 | 70.88100 | -14.65900 | 10.0000 | 109    | -0.022 |
| M04C | 2006 | 41 | 13 | 32      | 0.216    | P         | 0.200   | -0.449 |        |
| M06C | 2006 | 41 | 13 | 32      | 1.834    | P         | 0.200   | 0.215  |        |
| M05C | 2006 | 41 | 13 | 32      | 1.919    | P         | 0.200   | -0.010 |        |
| M03C | 2006 | 41 | 13 | 32      | 3.995    | P         | 0.200   | -0.413 |        |
| ELFS | 2006 | 41 | 13 | 32      | 5.962    | P         | 0.200   | -0.116 |        |
| O04C | 2006 | 41 | 13 | 32      | 8.346    | P         | 0.200   | -0.374 |        |
| N02C | 2006 | 41 | 13 | 32      | 9.621    | P         | 0.200   | -0.196 |        |
| BEK  | 2006 | 41 | 13 | 32      | 9.897    | P         | 0.200   | -0.306 |        |
| WDC  | 2006 | 41 | 13 | 32      | 9.899    | P         | 0.200   | 0.200  |        |
| O05C | 2006 | 41 | 13 | 32      | 10.453   | P         | 0.200   | -0.234 |        |
| O02C | 2006 | 41 | 13 | 32      | 10.729   | P         | 0.200   | -2.198 |        |
| O03C | 2006 | 41 | 13 | 32      | 11.704   | P         | 0.200   | -0.862 |        |
| ORV  | 2006 | 41 | 13 | 32      | 13.433   | P         | 0.200   | -0.859 |        |
| P05C | 2006 | 41 | 13 | 32      | 13.933   | P         | 0.200   | -0.478 |        |
| TPH  | 2006 | 41 | 13 | 32      | 14.645   | P         | 0.200   | -0.786 |        |
| SUTB | 2006 | 41 | 13 | 32      | 15.670   | P         | 0.200   | -1.298 |        |
| R05C | 2006 | 41 | 13 | 32      | 16.960   | P         | 0.200   | -0.461 |        |
| SN48 | 2006 | 41 | 13 | 32      | 17.136   | P         | 0.200   | -0.447 |        |
| R06C | 2006 | 41 | 13 | 32      | 17.265   | P         | 0.200   | 0.075  |        |
| SN28 | 2006 | 41 | 13 | 32      | 18.080   | P         | 0.200   | -0.400 |        |
| SN76 | 2006 | 41 | 13 | 32      | 18.585   | P         | 0.200   | 0.238  |        |
| SN57 | 2006 | 41 | 13 | 32      | 18.587   | P         | 0.200   | -0.043 |        |
| SN38 | 2006 | 41 | 13 | 32      | 19.028   | P         | 0.200   | 1.091  |        |
| R07C | 2006 | 41 | 13 | 32      | 19.202   | P         | 0.200   | 0.083  |        |
| S08C | 2006 | 41 | 13 | 32      | 20.824   | P         | 0.200   | -0.504 |        |
| MNRC | 2006 | 41 | 13 | 32      | 20.891   | P         | 0.200   | 0.245  |        |
| SN46 | 2006 | 41 | 13 | 32      | 21.231   | P         | 0.200   | 0.345  |        |
| R04C | 2006 | 41 | 13 | 32      | 21.323   | P         | 0.200   | -0.182 |        |
| SN55 | 2006 | 41 | 13 | 32      | 21.535   | P         | 0.200   | 0.372  |        |
| S06C | 2006 | 41 | 13 | 32      | 22.015   | P         | 0.200   | 0.047  |        |
| SN16 | 2006 | 41 | 13 | 32      | 22.107   | P         | 0.200   | -0.114 |        |
| SN73 | 2006 | 41 | 13 | 32      | 22.520   | P         | 0.200   | -0.405 |        |
| SN54 | 2006 | 41 | 13 | 32      | 22.627   | P         | 0.200   | 0.271  |        |
| SN44 | 2006 | 41 | 13 | 32      | 23.821   | P         | 0.200   | 0.335  |        |
| SN15 | 2006 | 41 | 13 | 32      | 23.922   | P         | 0.200   | 0.307  |        |

|      |      |    |    |    |        |   |       |        |
|------|------|----|----|----|--------|---|-------|--------|
| SN62 | 2006 | 41 | 13 | 32 | 24.118 | P | 0.200 | 0.019  |
| SN34 | 2006 | 41 | 13 | 32 | 24.137 | P | 0.200 | 0.438  |
| SN71 | 2006 | 41 | 13 | 32 | 24.322 | P | 0.200 | -0.235 |
| FUR  | 2006 | 41 | 13 | 32 | 24.476 | P | 0.200 | -0.294 |
| SN53 | 2006 | 41 | 13 | 32 | 24.483 | P | 0.200 | 0.438  |
| SN52 | 2006 | 41 | 13 | 32 | 25.365 | P | 0.200 | 0.114  |
| SN51 | 2006 | 41 | 13 | 32 | 26.279 | P | 0.200 | -0.142 |
| SN23 | 2006 | 41 | 13 | 32 | 26.312 | P | 0.200 | 0.640  |
| HELL | 2006 | 41 | 13 | 32 | 26.765 | P | 0.200 | -1.160 |
| T06C | 2006 | 41 | 13 | 32 | 27.155 | P | 0.200 | 0.044  |
| S04C | 2006 | 41 | 13 | 32 | 27.340 | P | 0.200 | 0.131  |
| SHO  | 2006 | 41 | 13 | 32 | 27.544 | P | 0.200 | 0.348  |
| CWC  | 2006 | 41 | 13 | 32 | 27.991 | P | 0.200 | 0.345  |
| SN21 | 2006 | 41 | 13 | 32 | 28.806 | P | 0.200 | 0.860  |
| MHC  | 2006 | 41 | 13 | 32 | 29.457 | P | 0.200 | 0.458  |
| PACP | 2006 | 41 | 13 | 32 | 30.939 | P | 0.200 | 0.637  |
| SAO  | 2006 | 41 | 13 | 32 | 32.510 | P | 0.200 | 0.395  |
| LRL  | 2006 | 41 | 13 | 32 | 32.899 | P | 0.200 | -0.068 |
| ISA  | 2006 | 41 | 13 | 32 | 33.539 | P | 0.200 | 0.215  |
| GSC  | 2006 | 41 | 13 | 32 | 34.091 | P | 0.200 | 1.789  |
| HAST | 2006 | 41 | 13 | 32 | 34.901 | P | 0.200 | 0.024  |
| U04C | 2006 | 41 | 13 | 32 | 35.354 | P | 0.200 | 1.892  |
| EDW2 | 2006 | 41 | 13 | 32 | 37.417 | P | 0.200 | 0.165  |
| BBR  | 2006 | 41 | 13 | 32 | 39.396 | P | 0.200 | 0.263  |

|      |      |    |    |         |          |           |         |        |        |
|------|------|----|----|---------|----------|-----------|---------|--------|--------|
| 2006 | 44   | 18 | 8  | 48.7494 | 59.50600 | -30.30000 | 10.0000 | 110    | -0.020 |
| M06C | 2006 | 44 | 18 | 18      | 25.161   | P         | 0.200   | 0.197  |        |
| M04C | 2006 | 44 | 18 | 18      | 25.747   | P         | 0.200   | -0.544 |        |
| M05C | 2006 | 44 | 18 | 18      | 26.257   | P         | 0.200   | -0.046 |        |
| ELFS | 2006 | 44 | 18 | 18      | 29.221   | P         | 0.200   | 0.011  |        |
| M03C | 2006 | 44 | 18 | 18      | 29.308   | P         | 0.200   | -0.644 |        |
| TPH  | 2006 | 44 | 18 | 18      | 31.558   | P         | 0.200   | -0.184 |        |
| O04C | 2006 | 44 | 18 | 18      | 31.797   | P         | 0.200   | -0.276 |        |
| BEK  | 2006 | 44 | 18 | 18      | 32.047   | P         | 0.200   | -0.150 |        |
| MNV  | 2006 | 44 | 18 | 18      | 32.648   | P         | 0.200   | -0.230 |        |
| O05C | 2006 | 44 | 18 | 18      | 33.214   | P         | 0.200   | -0.246 |        |
| WDC  | 2006 | 44 | 18 | 18      | 33.508   | P         | 0.200   | -1.658 |        |
| SN48 | 2006 | 44 | 18 | 18      | 35.459   | P         | 0.200   | -0.269 |        |
| SN38 | 2006 | 44 | 18 | 18      | 35.480   | P         | 0.200   | -0.238 |        |
| N02C | 2006 | 44 | 18 | 18      | 35.573   | P         | 0.200   | -0.855 |        |
| SN28 | 2006 | 44 | 18 | 18      | 35.695   | P         | 0.200   | -0.197 |        |
| P05C | 2006 | 44 | 18 | 18      | 36.162   | P         | 0.200   | -0.081 |        |
| ORV  | 2006 | 44 | 18 | 18      | 36.539   | P         | 0.200   | -0.972 |        |
| R06C | 2006 | 44 | 18 | 18      | 37.012   | P         | 0.200   | 0.172  |        |
| SN47 | 2006 | 44 | 18 | 18      | 37.402   | P         | 0.200   | -0.009 |        |
| SN37 | 2006 | 44 | 18 | 18      | 37.605   | P         | 0.200   | -0.048 |        |
| R05C | 2006 | 44 | 18 | 18      | 37.930   | P         | 0.200   | -0.088 |        |
| R07C | 2006 | 44 | 18 | 18      | 37.955   | P         | 0.200   | 0.088  |        |
| S08C | 2006 | 44 | 18 | 18      | 38.134   | P         | 0.200   | -0.281 |        |
| SN76 | 2006 | 44 | 18 | 18      | 38.230   | P         | 0.200   | 0.307  |        |
| GRA  | 2006 | 44 | 18 | 18      | 38.247   | P         | 0.200   | 0.165  |        |
| SUTB | 2006 | 44 | 18 | 18      | 38.911   | P         | 0.200   | -1.326 |        |
| SN36 | 2006 | 44 | 18 | 18      | 38.950   | P         | 0.200   | 0.092  |        |
| LAVA | 2006 | 44 | 18 | 18      | 39.087   | P         | 0.200   | -0.585 |        |
| SN16 | 2006 | 44 | 18 | 18      | 39.209   | P         | 0.200   | -0.085 |        |
| FUR  | 2006 | 44 | 18 | 18      | 39.222   | P         | 0.200   | -0.075 |        |
| SN85 | 2006 | 44 | 18 | 18      | 39.781   | P         | 0.200   | -0.102 |        |
| SN55 | 2006 | 44 | 18 | 18      | 40.192   | P         | 0.200   | 0.100  |        |
| SHO  | 2006 | 44 | 18 | 18      | 40.519   | P         | 0.200   | 0.043  |        |
| SN25 | 2006 | 44 | 18 | 18      | 40.919   | P         | 0.200   | 0.095  |        |
| SN15 | 2006 | 44 | 18 | 18      | 41.123   | P         | 0.200   | 0.069  |        |
| TUQ  | 2006 | 44 | 18 | 18      | 41.781   | P         | 0.200   | -0.200 |        |
| S06C | 2006 | 44 | 18 | 18      | 42.002   | P         | 0.200   | 0.427  |        |

|      |      |    |    |    |        |   |       |        |
|------|------|----|----|----|--------|---|-------|--------|
| CMB  | 2006 | 44 | 18 | 18 | 42.027 | P | 0.200 | -0.520 |
| SN34 | 2006 | 44 | 18 | 18 | 42.392 | P | 0.200 | 0.511  |
| SN44 | 2006 | 44 | 18 | 18 | 42.550 | P | 0.200 | 0.519  |
| R04C | 2006 | 44 | 18 | 18 | 42.841 | P | 0.200 | -0.025 |
| SN73 | 2006 | 44 | 18 | 18 | 42.904 | P | 0.200 | 0.057  |
| SN53 | 2006 | 44 | 18 | 18 | 43.843 | P | 0.200 | 0.693  |
| SN62 | 2006 | 44 | 18 | 18 | 44.071 | P | 0.200 | 0.388  |
| SN23 | 2006 | 44 | 18 | 18 | 44.403 | P | 0.200 | 0.576  |
| SN71 | 2006 | 44 | 18 | 18 | 44.791 | P | 0.200 | 0.087  |
| SN52 | 2006 | 44 | 18 | 18 | 44.821 | P | 0.200 | 0.433  |
| SN22 | 2006 | 44 | 18 | 18 | 45.324 | P | 0.200 | 0.535  |
| SN21 | 2006 | 44 | 18 | 18 | 45.802 | P | 0.200 | -0.465 |
| HELL | 2006 | 44 | 18 | 18 | 45.955 | P | 0.200 | 0.468  |
| GSC  | 2006 | 44 | 18 | 18 | 45.987 | P | 0.200 | 0.171  |
| T06C | 2006 | 44 | 18 | 18 | 46.005 | P | 0.200 | 0.172  |
| SN51 | 2006 | 44 | 18 | 18 | 46.032 | P | 0.200 | 0.258  |
| S05C | 2006 | 44 | 18 | 18 | 46.607 | P | 0.200 | 0.639  |
| HEC  | 2006 | 44 | 18 | 18 | 46.794 | P | 0.200 | -0.093 |
| LRL  | 2006 | 44 | 18 | 18 | 47.949 | P | 0.200 | 0.093  |
| S04C | 2006 | 44 | 18 | 18 | 48.699 | P | 0.200 | 0.237  |
| ISA  | 2006 | 44 | 18 | 18 | 49.927 | P | 0.200 | 0.523  |
| VES  | 2006 | 44 | 18 | 18 | 51.516 | P | 0.200 | 1.126  |
| PACP | 2006 | 44 | 18 | 18 | 51.898 | P | 0.200 | 0.788  |
| EDW2 | 2006 | 44 | 18 | 18 | 52.497 | P | 0.200 | 0.368  |
| BFS  | 2006 | 44 | 18 | 18 | 54.763 | P | 0.200 | 0.022  |
| PKD  | 2006 | 44 | 18 | 18 | 54.795 | P | 0.200 | 0.075  |
| CIA  | 2006 | 44 | 18 | 19 | 1.635  | P | 0.200 | -0.011 |

|      |      |     |    |         |          |           |         |        |        |
|------|------|-----|----|---------|----------|-----------|---------|--------|--------|
| 2005 | 311  | 1   | 49 | 39.4119 | 71.68900 | -12.06400 | 23.6000 | 33     | -0.009 |
| M04C | 2005 | 311 | 1  | 59      | 19.906   | P         | 0.200   | -0.236 |        |
| M05C | 2005 | 311 | 1  | 59      | 21.611   | P         | 0.200   | 0.107  |        |
| M06C | 2005 | 311 | 1  | 59      | 21.615   | P         | 0.200   | 0.331  |        |
| M03C | 2005 | 311 | 1  | 59      | 23.520   | P         | 0.200   | -0.349 |        |
| M02C | 2005 | 311 | 1  | 59      | 23.956   | P         | 0.200   | -0.498 |        |
| WDC  | 2005 | 311 | 1  | 59      | 27.998   | P         | 0.200   | -1.126 |        |
| O04C | 2005 | 311 | 1  | 59      | 28.233   | P         | 0.200   | -0.104 |        |
| N02C | 2005 | 311 | 1  | 59      | 29.117   | P         | 0.200   | -0.019 |        |
| O05C | 2005 | 311 | 1  | 59      | 30.223   | P         | 0.200   | -0.110 |        |
| ORV  | 2005 | 311 | 1  | 59      | 33.196   | P         | 0.200   | -0.689 |        |
| P05C | 2005 | 311 | 1  | 59      | 33.864   | P         | 0.200   | -0.264 |        |
| TPH  | 2005 | 311 | 1  | 59      | 34.831   | P         | 0.200   | -0.775 |        |
| SUTB | 2005 | 311 | 1  | 59      | 35.458   | P         | 0.200   | -1.083 |        |
| R05C | 2005 | 311 | 1  | 59      | 36.976   | P         | 0.200   | -0.251 |        |
| LAVA | 2005 | 311 | 1  | 59      | 37.089   | P         | 0.200   | -0.771 |        |
| R06C | 2005 | 311 | 1  | 59      | 37.312   | P         | 0.200   | 0.235  |        |
| SN48 | 2005 | 311 | 1  | 59      | 37.354   | P         | 0.200   | -0.233 |        |
| SN38 | 2005 | 311 | 1  | 59      | 37.625   | P         | 0.200   | -0.342 |        |
| Q04C | 2005 | 311 | 1  | 59      | 38.239   | P         | 0.200   | -0.187 |        |
| SN67 | 2005 | 311 | 1  | 59      | 38.296   | P         | 0.200   | 0.236  |        |
| SN28 | 2005 | 311 | 1  | 59      | 38.305   | P         | 0.200   | -0.230 |        |
| SN76 | 2005 | 311 | 1  | 59      | 38.580   | P         | 0.200   | 0.358  |        |
| SN57 | 2005 | 311 | 1  | 59      | 38.955   | P         | 0.200   | 0.376  |        |
| SN85 | 2005 | 311 | 1  | 59      | 39.316   | P         | 0.200   | -0.290 |        |
| SN66 | 2005 | 311 | 1  | 59      | 39.333   | P         | 0.200   | 0.192  |        |
| R07C | 2005 | 311 | 1  | 59      | 39.362   | P         | 0.200   | 0.302  |        |
| SN95 | 2005 | 311 | 1  | 59      | 39.417   | P         | 0.200   | -0.397 |        |
| SN37 | 2005 | 311 | 1  | 59      | 39.869   | P         | 0.200   | 0.028  |        |
| TPNV | 2005 | 311 | 1  | 59      | 40.243   | P         | 0.200   | -0.708 |        |
| SN84 | 2005 | 311 | 1  | 59      | 40.315   | P         | 0.200   | -0.392 |        |
| SN56 | 2005 | 311 | 1  | 59      | 40.443   | P         | 0.200   | 0.278  |        |
| MNRC | 2005 | 311 | 1  | 59      | 40.510   | P         | 0.200   | 0.366  |        |
| S08C | 2005 | 311 | 1  | 59      | 41.058   | P         | 0.200   | -0.331 |        |
| R04C | 2005 | 311 | 1  | 59      | 41.146   | P         | 0.200   | -0.060 |        |



|      |      |     |   |    |        |   |       |        |
|------|------|-----|---|----|--------|---|-------|--------|
| CMB  | 2005 | 311 | 1 | 59 | 41.257 | P | 0.200 | -0.649 |
| SN74 | 2005 | 311 | 1 | 59 | 41.267 | P | 0.200 | -0.180 |
| SN55 | 2005 | 311 | 1 | 59 | 41.466 | P | 0.200 | 0.397  |
| S06C | 2005 | 311 | 1 | 59 | 41.932 | P | 0.200 | 0.115  |
| SN64 | 2005 | 311 | 1 | 59 | 41.956 | P | 0.200 | 0.206  |
| SN45 | 2005 | 311 | 1 | 59 | 42.266 | P | 0.200 | 0.294  |
| SN73 | 2005 | 311 | 1 | 59 | 42.507 | P | 0.200 | -0.233 |
| SN54 | 2005 | 311 | 1 | 59 | 42.639 | P | 0.200 | 0.389  |
| SN25 | 2005 | 311 | 1 | 59 | 43.586 | P | 0.200 | 0.424  |
| SN44 | 2005 | 311 | 1 | 59 | 43.919 | P | 0.200 | 0.500  |
| SN62 | 2005 | 311 | 1 | 59 | 44.075 | P | 0.200 | 0.133  |
| SN15 | 2005 | 311 | 1 | 59 | 44.159 | P | 0.200 | 0.515  |
| SN71 | 2005 | 311 | 1 | 59 | 44.228 | P | 0.200 | -0.115 |
| SN34 | 2005 | 311 | 1 | 59 | 44.265 | P | 0.200 | 0.599  |
| TIN  | 2005 | 311 | 1 | 59 | 44.447 | P | 0.200 | 0.373  |
| SN53 | 2005 | 311 | 1 | 59 | 44.482 | P | 0.200 | 0.553  |
| FUR  | 2005 | 311 | 1 | 59 | 44.796 | P | 0.200 | -0.222 |
| SN43 | 2005 | 311 | 1 | 59 | 44.924 | P | 0.200 | 0.578  |
| SN52 | 2005 | 311 | 1 | 59 | 45.351 | P | 0.200 | 0.233  |
| SN23 | 2005 | 311 | 1 | 59 | 46.278 | P | 0.200 | 0.654  |
| SN51 | 2005 | 311 | 1 | 59 | 46.288 | P | 0.200 | 0.031  |
| S05C | 2005 | 311 | 1 | 59 | 46.298 | P | 0.200 | 0.330  |
| SN22 | 2005 | 311 | 1 | 59 | 46.782 | P | 0.200 | 0.316  |
| S04C | 2005 | 311 | 1 | 59 | 47.138 | P | 0.200 | 0.249  |
| T06C | 2005 | 311 | 1 | 59 | 47.213 | P | 0.200 | 0.210  |
| SN11 | 2005 | 311 | 1 | 59 | 47.741 | P | 0.200 | -0.495 |
| CWC  | 2005 | 311 | 1 | 59 | 48.213 | P | 0.200 | 0.459  |
| HELL | 2005 | 311 | 1 | 59 | 48.316 | P | 0.200 | 0.404  |
| MPM  | 2005 | 311 | 1 | 59 | 49.378 | P | 0.200 | 0.167  |
| TUQ  | 2005 | 311 | 1 | 59 | 49.985 | P | 0.200 | 0.097  |
| RCT  | 2005 | 311 | 1 | 59 | 50.236 | P | 0.200 | -0.493 |
| PACP | 2005 | 311 | 1 | 59 | 50.805 | P | 0.200 | 0.798  |
| VES  | 2005 | 311 | 1 | 59 | 52.500 | P | 0.200 | -0.901 |
| GSC  | 2005 | 311 | 1 | 59 | 52.695 | P | 0.200 | 0.105  |
| LRL  | 2005 | 311 | 1 | 59 | 53.243 | P | 0.200 | 0.103  |
| ISA  | 2005 | 311 | 1 | 59 | 53.631 | P | 0.200 | 0.238  |
| HEC  | 2005 | 311 | 1 | 59 | 54.693 | P | 0.200 | 0.020  |
| PKD  | 2005 | 311 | 1 | 59 | 55.861 | P | 0.200 | 0.312  |
| EDW2 | 2005 | 311 | 1 | 59 | 57.636 | P | 0.200 | 0.238  |
| BFS  | 2005 | 311 | 2 | 0  | 0.857  | P | 0.200 | -0.118 |

|      |      |     |    |        |          |          |        |        |        |
|------|------|-----|----|--------|----------|----------|--------|--------|--------|
| 2006 | 141  | 10  | 58 | 4.7623 | 51.51000 | 16.02600 | 5.0000 | 130    | -0.016 |
| HUMO | 2006 | 141 | 11 | 10     | 12.745   | P        | 0.200  | -0.466 |        |
| M07A | 2006 | 141 | 11 | 10     | 13.076   | P        | 0.200  | 0.395  |        |
| N08A | 2006 | 141 | 11 | 10     | 13.963   | P        | 0.200  | 0.010  |        |
| M04C | 2006 | 141 | 11 | 10     | 15.122   | P        | 0.200  | -0.587 |        |
| O09A | 2006 | 141 | 11 | 10     | 15.182   | P        | 0.200  | 0.235  |        |
| N07B | 2006 | 141 | 11 | 10     | 15.473   | P        | 0.200  | 0.059  |        |
| M06C | 2006 | 141 | 11 | 10     | 16.174   | P        | 0.200  | 0.167  |        |
| L02A | 2006 | 141 | 11 | 10     | 16.242   | P        | 0.200  | -0.243 |        |
| M05C | 2006 | 141 | 11 | 10     | 16.245   | P        | 0.200  | -0.198 |        |
| P09A | 2006 | 141 | 11 | 10     | 17.702   | P        | 0.200  | -0.299 |        |
| M03C | 2006 | 141 | 11 | 10     | 17.743   | P        | 0.200  | -0.707 |        |
| O07A | 2006 | 141 | 11 | 10     | 18.288   | P        | 0.200  | 0.190  |        |
| M02C | 2006 | 141 | 11 | 10     | 18.302   | P        | 0.200  | -0.807 |        |
| ELFS | 2006 | 141 | 11 | 10     | 19.215   | P        | 0.200  | -0.175 |        |
| HATC | 2006 | 141 | 11 | 10     | 19.387   | P        | 0.200  | -0.135 |        |
| O06A | 2006 | 141 | 11 | 10     | 19.699   | P        | 0.200  | -0.074 |        |
| BEK  | 2006 | 141 | 11 | 10     | 21.732   | P        | 0.200  | -0.596 |        |
| Q08A | 2006 | 141 | 11 | 10     | 21.894   | P        | 0.200  | -0.728 |        |
| N02C | 2006 | 141 | 11 | 10     | 22.227   | P        | 0.200  | -0.479 |        |
| O04C | 2006 | 141 | 11 | 10     | 22.333   | P        | 0.200  | 0.902  |        |
| WCN  | 2006 | 141 | 11 | 10     | 23.854   | P        | 0.200  | -0.214 |        |

|      |      |     |    |    |        |   |       |        |
|------|------|-----|----|----|--------|---|-------|--------|
| MNV  | 2006 | 141 | 11 | 10 | 24.131 | P | 0.200 | -1.006 |
| TPH  | 2006 | 141 | 11 | 10 | 24.209 | P | 0.200 | -0.859 |
| ORV  | 2006 | 141 | 11 | 10 | 24.375 | P | 0.200 | -1.226 |
| P05C | 2006 | 141 | 11 | 10 | 24.717 | P | 0.200 | -0.755 |
| S09A | 2006 | 141 | 11 | 10 | 25.906 | P | 0.200 | -0.761 |
| SUTB | 2006 | 141 | 11 | 10 | 26.167 | P | 0.200 | -1.390 |
| SN48 | 2006 | 141 | 11 | 10 | 27.075 | P | 0.200 | -0.046 |
| R06C | 2006 | 141 | 11 | 10 | 27.095 | P | 0.200 | -0.085 |
| SN38 | 2006 | 141 | 11 | 10 | 27.097 | P | 0.200 | -0.175 |
| SN28 | 2006 | 141 | 11 | 10 | 27.660 | P | 0.200 | 0.070  |
| TPNV | 2006 | 141 | 11 | 10 | 27.840 | P | 0.200 | -0.545 |
| Q04C | 2006 | 141 | 11 | 10 | 28.412 | P | 0.200 | -0.406 |
| SN66 | 2006 | 141 | 11 | 10 | 28.959 | P | 0.200 | 0.321  |
| SN37 | 2006 | 141 | 11 | 10 | 29.053 | P | 0.200 | 0.349  |
| S08C | 2006 | 141 | 11 | 10 | 29.891 | P | 0.200 | 0.163  |
| SN36 | 2006 | 141 | 11 | 10 | 30.165 | P | 0.200 | 0.568  |
| GRA  | 2006 | 141 | 11 | 10 | 30.565 | P | 0.200 | 0.488  |
| SN16 | 2006 | 141 | 11 | 10 | 30.742 | P | 0.200 | 0.410  |
| S06C | 2006 | 141 | 11 | 10 | 30.873 | P | 0.200 | 0.198  |
| SN64 | 2006 | 141 | 11 | 10 | 31.037 | P | 0.200 | 0.384  |
| SN73 | 2006 | 141 | 11 | 10 | 31.466 | P | 0.200 | -0.006 |
| SN25 | 2006 | 141 | 11 | 10 | 31.780 | P | 0.200 | 0.598  |
| FUR  | 2006 | 141 | 11 | 10 | 32.101 | P | 0.200 | 0.609  |
| SN15 | 2006 | 141 | 11 | 10 | 32.214 | P | 0.200 | 0.641  |
| SN71 | 2006 | 141 | 11 | 10 | 32.730 | P | 0.200 | -0.028 |
| SN52 | 2006 | 141 | 11 | 10 | 33.125 | P | 0.200 | 0.127  |
| SHO  | 2006 | 141 | 11 | 10 | 33.572 | P | 0.200 | 0.584  |
| SN23 | 2006 | 141 | 11 | 10 | 33.707 | P | 0.200 | 0.524  |
| SN51 | 2006 | 141 | 11 | 10 | 33.926 | P | 0.200 | -0.041 |
| S05C | 2006 | 141 | 11 | 10 | 34.026 | P | 0.200 | 0.210  |
| T06C | 2006 | 141 | 11 | 10 | 34.340 | P | 0.200 | 0.037  |
| SN21 | 2006 | 141 | 11 | 10 | 34.350 | P | 0.200 | -0.503 |
| SN11 | 2006 | 141 | 11 | 10 | 34.495 | P | 0.200 | -0.502 |
| CWC  | 2006 | 141 | 11 | 10 | 34.575 | P | 0.200 | 0.423  |
| HELL | 2006 | 141 | 11 | 10 | 34.807 | P | 0.200 | 0.130  |
| TUQ  | 2006 | 141 | 11 | 10 | 35.003 | P | 0.200 | 0.496  |
| MPM  | 2006 | 141 | 11 | 10 | 35.168 | P | 0.200 | 0.163  |
| RCT  | 2006 | 141 | 11 | 10 | 35.931 | P | 0.200 | -0.874 |
| GSC  | 2006 | 141 | 11 | 10 | 37.314 | P | 0.200 | 0.341  |
| VES  | 2006 | 141 | 11 | 10 | 37.763 | P | 0.200 | -0.934 |
| PACP | 2006 | 141 | 11 | 10 | 37.915 | P | 0.200 | 0.777  |
| LRL  | 2006 | 141 | 11 | 10 | 38.118 | P | 0.200 | 0.299  |
| HEC  | 2006 | 141 | 11 | 10 | 38.296 | P | 0.200 | 0.063  |
| ISA  | 2006 | 141 | 11 | 10 | 38.606 | P | 0.200 | 0.255  |
| SAO  | 2006 | 141 | 11 | 10 | 38.765 | P | 0.200 | 0.287  |
| U05C | 2006 | 141 | 11 | 10 | 39.014 | P | 0.200 | 0.957  |
| EDW2 | 2006 | 141 | 11 | 10 | 41.354 | P | 0.200 | 0.408  |
| BBR  | 2006 | 141 | 11 | 10 | 42.262 | P | 0.200 | 0.318  |
| PKD  | 2006 | 141 | 11 | 10 | 42.539 | P | 0.200 | 1.645  |
| SMM  | 2006 | 141 | 11 | 10 | 42.736 | P | 0.200 | 0.184  |
| BFS  | 2006 | 141 | 11 | 10 | 43.207 | P | 0.200 | -0.189 |
| CHF  | 2006 | 141 | 11 | 10 | 43.718 | P | 0.200 | 0.205  |
| MWC  | 2006 | 141 | 11 | 10 | 44.019 | P | 0.200 | -0.134 |
| DEC  | 2006 | 141 | 11 | 10 | 44.244 | P | 0.200 | -0.167 |
| MPP  | 2006 | 141 | 11 | 10 | 45.180 | P | 0.200 | 0.865  |
| CIA  | 2006 | 141 | 11 | 10 | 48.519 | P | 0.200 | 0.284  |

|      |      |     |    |         |          |          |        |        |        |
|------|------|-----|----|---------|----------|----------|--------|--------|--------|
| 2006 | 292  | 9   | 34 | 53.7401 | 42.30000 | 19.80000 | 6.0000 | 235    | -0.045 |
| N08A | 2006 | 292 | 9  | 47      | 49.664   | P        | 0.200  | 0.256  |        |
| M04C | 2006 | 292 | 9  | 47      | 49.879   | P        | 0.200  | -1.635 |        |
| O09A | 2006 | 292 | 9  | 47      | 50.315   | P        | 0.200  | 0.303  |        |
| N07B | 2006 | 292 | 9  | 47      | 51.135   | P        | 0.200  | 0.356  |        |
| P09A | 2006 | 292 | 9  | 47      | 52.377   | P        | 0.200  | -0.268 |        |

|      |      |     |   |    |        |   |       |        |
|------|------|-----|---|----|--------|---|-------|--------|
| O07A | 2006 | 292 | 9 | 47 | 53.451 | P | 0.200 | 0.447  |
| SNF9 | 2006 | 292 | 9 | 47 | 56.481 | P | 0.200 | 0.771  |
| SNE9 | 2006 | 292 | 9 | 47 | 55.915 | P | 0.200 | -0.006 |
| O04C | 2006 | 292 | 9 | 47 | 56.210 | P | 0.200 | -0.053 |
| SND8 | 2006 | 292 | 9 | 47 | 57.513 | P | 0.200 | -0.178 |
| BEK  | 2006 | 292 | 9 | 47 | 56.704 | P | 0.200 | -0.220 |
| SNB9 | 2006 | 292 | 9 | 47 | 57.813 | P | 0.200 | 0.067  |
| R09A | 2006 | 292 | 9 | 47 | 57.035 | P | 0.200 | -0.544 |
| SND7 | 2006 | 292 | 9 | 47 | 58.212 | P | 0.200 | -0.089 |
| SNG5 | 2006 | 292 | 9 | 47 | 58.613 | P | 0.200 | -0.780 |
| Q08A | 2006 | 292 | 9 | 47 | 57.805 | P | 0.200 | 1.093  |
| SNC7 | 2006 | 292 | 9 | 47 | 59.264 | P | 0.200 | -0.196 |
| WCN  | 2006 | 292 | 9 | 47 | 58.684 | P | 0.200 | 0.375  |
| SND5 | 2006 | 292 | 9 | 47 | 59.926 | P | 0.200 | -0.584 |
| SNA7 | 2006 | 292 | 9 | 48 | 0.020  | P | 0.200 | 0.215  |
| R08A | 2006 | 292 | 9 | 47 | 59.035 | P | 0.200 | -0.135 |
| SNE6 | 2006 | 292 | 9 | 47 | 59.268 | P | 0.200 | 0.035  |
| ORV  | 2006 | 292 | 9 | 47 | 59.296 | P | 0.200 | -0.613 |
| SNE4 | 2006 | 292 | 9 | 48 | 0.349  | P | 0.200 | -0.632 |
| S09A | 2006 | 292 | 9 | 47 | 59.733 | P | 0.200 | -0.275 |
| SNE5 | 2006 | 292 | 9 | 47 | 59.736 | P | 0.200 | -0.358 |
| SNB5 | 2006 | 292 | 9 | 48 | 1.145  | P | 0.200 | -0.385 |
| SNC4 | 2006 | 292 | 9 | 48 | 1.372  | P | 0.200 | -0.501 |
| SNC5 | 2006 | 292 | 9 | 48 | 0.906  | P | 0.200 | 0.052  |
| SND4 | 2006 | 292 | 9 | 48 | 0.919  | P | 0.200 | -0.506 |
| LAVA | 2006 | 292 | 9 | 48 | 1.547  | P | 0.200 | -0.541 |
| SNA4 | 2006 | 292 | 9 | 48 | 2.633  | P | 0.200 | -0.201 |
| SUTB | 2006 | 292 | 9 | 48 | 2.306  | P | 0.200 | 0.683  |
| SN96 | 2006 | 292 | 9 | 48 | 2.394  | P | 0.200 | 0.299  |
| R07C | 2006 | 292 | 9 | 48 | 2.817  | P | 0.200 | 0.852  |
| SNB3 | 2006 | 292 | 9 | 48 | 3.363  | P | 0.200 | 0.331  |
| S08C | 2006 | 292 | 9 | 48 | 3.421  | P | 0.200 | 0.525  |
| U10A | 2006 | 292 | 9 | 48 | 4.054  | P | 0.200 | 0.581  |
| SNA3 | 2006 | 292 | 9 | 48 | 4.117  | P | 0.200 | 0.594  |
| CMB  | 2006 | 292 | 9 | 48 | 4.380  | P | 0.200 | -0.012 |
| SN93 | 2006 | 292 | 9 | 48 | 4.474  | P | 0.200 | 0.426  |
| V11A | 2006 | 292 | 9 | 48 | 4.516  | P | 0.200 | 0.459  |
| S06C | 2006 | 292 | 9 | 48 | 4.618  | P | 0.200 | 0.599  |
| FUR  | 2006 | 292 | 9 | 48 | 4.726  | P | 0.200 | 0.656  |
| SN43 | 2006 | 292 | 9 | 48 | 4.924  | P | 0.200 | -0.617 |
| CWC  | 2006 | 292 | 9 | 48 | 5.601  | P | 0.200 | -1.094 |
| TUQ  | 2006 | 292 | 9 | 48 | 6.914  | P | 0.200 | 0.428  |
| T06C | 2006 | 292 | 9 | 48 | 7.211  | P | 0.200 | 0.077  |
| HELL | 2006 | 292 | 9 | 48 | 7.504  | P | 0.200 | 0.167  |
| SLA  | 2006 | 292 | 9 | 48 | 7.708  | P | 0.200 | 0.376  |
| GSC  | 2006 | 292 | 9 | 48 | 9.090  | P | 0.200 | 0.214  |
| LRL  | 2006 | 292 | 9 | 48 | 9.942  | P | 0.200 | 0.127  |
| ISA  | 2006 | 292 | 9 | 48 | 10.682 | P | 0.200 | 0.235  |
| EDW2 | 2006 | 292 | 9 | 48 | 13.055 | P | 0.200 | 0.409  |
| SVD  | 2006 | 292 | 9 | 48 | 13.824 | P | 0.200 | -0.174 |
| BFS  | 2006 | 292 | 9 | 48 | 13.970 | P | 0.200 | -0.796 |
| MWC  | 2006 | 292 | 9 | 48 | 14.035 | P | 0.200 | -1.486 |
| MPP  | 2006 | 292 | 9 | 48 | 16.917 | P | 0.200 | 0.870  |

|      |      |     |    |        |          |           |         |       |        |
|------|------|-----|----|--------|----------|-----------|---------|-------|--------|
| 2006 | 209  | 9   | 15 | 3.2600 | 59.07400 | -30.58500 | 10.0000 | 201   | -0.005 |
| J05A | 2006 | 209 | 9  | 24     | 31.318   | P         | 0.200   | 0.626 |        |
| N08A | 2006 | 209 | 9  | 24     | 34.421   | P         | 0.200   | 0.166 |        |
| M07A | 2006 | 209 | 9  | 24     | 34.662   | P         | 0.200   | 0.417 |        |
| O09A | 2006 | 209 | 9  | 24     | 34.999   | P         | 0.200   | 0.664 |        |
| P10A | 2006 | 209 | 9  | 24     | 35.768   | P         | 0.200   | 0.837 |        |
| Q11A | 2006 | 209 | 9  | 24     | 36.652   | P         | 0.200   | 0.236 |        |
| N07B | 2006 | 209 | 9  | 24     | 37.259   | P         | 0.200   | 0.154 |        |
| P09A | 2006 | 209 | 9  | 24     | 38.262   | P         | 0.200   | 0.538 |        |

|      |      |     |   |    |        |   |       |        |
|------|------|-----|---|----|--------|---|-------|--------|
| L04A | 2006 | 209 | 9 | 24 | 38.565 | P | 0.200 | -0.512 |
| M06C | 2006 | 209 | 9 | 24 | 39.987 | P | 0.200 | 0.192  |
| N06A | 2006 | 209 | 9 | 24 | 40.280 | P | 0.200 | 0.133  |
| O07A | 2006 | 209 | 9 | 24 | 40.470 | P | 0.200 | 0.339  |
| M04C | 2006 | 209 | 9 | 24 | 40.552 | P | 0.200 | -0.647 |
| M05C | 2006 | 209 | 9 | 24 | 41.066 | P | 0.200 | -0.099 |
| Q09A | 2006 | 209 | 9 | 24 | 42.052 | P | 0.200 | 0.155  |
| O06A | 2006 | 209 | 9 | 24 | 43.737 | P | 0.200 | 0.394  |
| M03C | 2006 | 209 | 9 | 24 | 44.001 | P | 0.200 | -0.845 |
| Q08A | 2006 | 209 | 9 | 24 | 44.093 | P | 0.200 | -0.157 |
| P07A | 2006 | 209 | 9 | 24 | 44.358 | P | 0.200 | 0.640  |
| R09A | 2006 | 209 | 9 | 24 | 44.716 | P | 0.200 | -0.030 |
| M02C | 2006 | 209 | 9 | 24 | 45.109 | P | 0.200 | -1.526 |
| O04C | 2006 | 209 | 9 | 24 | 46.457 | P | 0.200 | -0.427 |
| Q07A | 2006 | 209 | 9 | 24 | 46.560 | P | 0.200 | -0.268 |
| BEK  | 2006 | 209 | 9 | 24 | 46.808 | P | 0.200 | -0.156 |
| R08A | 2006 | 209 | 9 | 24 | 47.319 | P | 0.200 | -0.460 |
| O05C | 2006 | 209 | 9 | 24 | 47.902 | P | 0.200 | -0.347 |
| S09A | 2006 | 209 | 9 | 24 | 48.042 | P | 0.200 | -0.203 |
| WDC  | 2006 | 209 | 9 | 24 | 48.086 | P | 0.200 | -1.960 |
| WCN  | 2006 | 209 | 9 | 24 | 48.595 | P | 0.200 | 0.394  |
| SN48 | 2006 | 209 | 9 | 24 | 49.924 | P | 0.200 | -0.423 |
| TPNV | 2006 | 209 | 9 | 24 | 48.970 | P | 0.200 | -0.222 |
| U11A | 2006 | 209 | 9 | 24 | 49.158 | P | 0.200 | 0.119  |
| SN67 | 2006 | 209 | 9 | 24 | 51.446 | P | 0.200 | -0.372 |
| P05C | 2006 | 209 | 9 | 24 | 50.759 | P | 0.200 | -0.237 |
| SN47 | 2006 | 209 | 9 | 24 | 51.917 | P | 0.200 | -0.112 |
| SN37 | 2006 | 209 | 9 | 24 | 52.156 | P | 0.200 | -0.100 |
| ORV  | 2006 | 209 | 9 | 24 | 51.383 | P | 0.200 | -0.923 |
| R06C | 2006 | 209 | 9 | 24 | 51.479 | P | 0.200 | -0.032 |
| O02C | 2006 | 209 | 9 | 24 | 51.809 | P | 0.200 | -1.389 |
| SN66 | 2006 | 209 | 9 | 24 | 52.926 | P | 0.200 | -0.177 |
| V11A | 2006 | 209 | 9 | 24 | 52.255 | P | 0.200 | -0.223 |
| R07C | 2006 | 209 | 9 | 24 | 52.388 | P | 0.200 | -0.114 |
| SN36 | 2006 | 209 | 9 | 24 | 53.449 | P | 0.200 | -0.010 |
| R05C | 2006 | 209 | 9 | 24 | 52.480 | P | 0.200 | -0.240 |
| U10A | 2006 | 209 | 9 | 24 | 52.620 | P | 0.200 | 0.278  |
| S08C | 2006 | 209 | 9 | 24 | 52.656 | P | 0.200 | -0.334 |
| SN56 | 2006 | 209 | 9 | 24 | 53.697 | P | 0.200 | 0.001  |
| SN16 | 2006 | 209 | 9 | 24 | 53.728 | P | 0.200 | -0.140 |
| GRA  | 2006 | 209 | 9 | 24 | 52.765 | P | 0.200 | 0.163  |
| SN76 | 2006 | 209 | 9 | 24 | 52.893 | P | 0.200 | 0.305  |
| SN57 | 2006 | 209 | 9 | 24 | 52.910 | P | 0.200 | 0.967  |
| SN85 | 2006 | 209 | 9 | 24 | 54.409 | P | 0.200 | -0.156 |
| SUTB | 2006 | 209 | 9 | 24 | 53.602 | P | 0.200 | -1.427 |
| LAVA | 2006 | 209 | 9 | 24 | 53.666 | P | 0.200 | -0.739 |
| FUR  | 2006 | 209 | 9 | 24 | 53.797 | P | 0.200 | 0.022  |
| SN55 | 2006 | 209 | 9 | 24 | 55.078 | P | 0.200 | 0.350  |
| SN45 | 2006 | 209 | 9 | 24 | 55.084 | P | 0.200 | 0.046  |
| SN84 | 2006 | 209 | 9 | 24 | 55.377 | P | 0.200 | -0.453 |
| SN15 | 2006 | 209 | 9 | 24 | 55.554 | P | 0.200 | -0.084 |
| SHO  | 2006 | 209 | 9 | 24 | 54.946 | P | 0.200 | 0.038  |
| SN74 | 2006 | 209 | 9 | 24 | 56.059 | P | 0.200 | -0.039 |
| SN64 | 2006 | 209 | 9 | 24 | 56.371 | P | 0.200 | 0.486  |
| SN25 | 2006 | 209 | 9 | 24 | 55.458 | P | 0.200 | 0.043  |
| Q04C | 2006 | 209 | 9 | 24 | 55.574 | P | 0.200 | -0.377 |
| SN54 | 2006 | 209 | 9 | 24 | 56.641 | P | 0.200 | 0.573  |
| SN34 | 2006 | 209 | 9 | 24 | 56.997 | P | 0.200 | 0.505  |
| SN44 | 2006 | 209 | 9 | 24 | 57.068 | P | 0.200 | 0.415  |
| SN24 | 2006 | 209 | 9 | 24 | 57.160 | P | 0.200 | 0.309  |
| TUQ  | 2006 | 209 | 9 | 24 | 56.325 | P | 0.200 | -0.055 |
| S06C | 2006 | 209 | 9 | 24 | 56.509 | P | 0.200 | 0.273  |
| SN73 | 2006 | 209 | 9 | 24 | 57.569 | P | 0.200 | 0.054  |

|      |      |     |   |    |        |   |       |        |
|------|------|-----|---|----|--------|---|-------|--------|
| CMB  | 2006 | 209 | 9 | 24 | 56.662 | P | 0.200 | -0.573 |
| SN43 | 2006 | 209 | 9 | 24 | 58.400 | P | 0.200 | 0.560  |
| R04C | 2006 | 209 | 9 | 24 | 57.457 | P | 0.200 | -0.126 |
| SN23 | 2006 | 209 | 9 | 24 | 59.003 | P | 0.200 | 0.571  |
| SN52 | 2006 | 209 | 9 | 24 | 59.354 | P | 0.200 | 0.328  |
| SN71 | 2006 | 209 | 9 | 24 | 59.410 | P | 0.200 | 0.034  |
| CWC  | 2006 | 209 | 9 | 24 | 58.520 | P | 0.200 | 0.228  |
| MPM  | 2006 | 209 | 9 | 24 | 58.684 | P | 0.200 | 0.124  |
| SLA  | 2006 | 209 | 9 | 24 | 58.913 | P | 0.200 | 0.360  |
| SN11 | 2006 | 209 | 9 | 25 | 0.349  | P | 0.200 | -0.506 |
| SN21 | 2006 | 209 | 9 | 25 | 0.402  | P | 0.200 | -0.471 |
| SN51 | 2006 | 209 | 9 | 25 | 0.572  | P | 0.200 | 0.154  |
| GSC  | 2006 | 209 | 9 | 25 | 0.414  | P | 0.200 | 0.173  |
| HELL | 2006 | 209 | 9 | 25 | 0.479  | P | 0.200 | 0.413  |
| T06C | 2006 | 209 | 9 | 25 | 0.521  | P | 0.200 | 0.071  |
| HEC  | 2006 | 209 | 9 | 25 | 1.283  | P | 0.200 | 0.009  |
| RCT  | 2006 | 209 | 9 | 25 | 2.214  | P | 0.200 | -0.664 |
| LRL  | 2006 | 209 | 9 | 25 | 2.420  | P | 0.200 | 0.086  |
| CVS  | 2006 | 209 | 9 | 25 | 2.502  | P | 0.200 | 0.312  |
| S04C | 2006 | 209 | 9 | 25 | 3.301  | P | 0.200 | 0.133  |
| ISA  | 2006 | 209 | 9 | 25 | 4.439  | P | 0.200 | 0.518  |
| MHC  | 2006 | 209 | 9 | 25 | 5.550  | P | 0.200 | 0.321  |
| VES  | 2006 | 209 | 9 | 25 | 6.010  | P | 0.200 | 1.074  |
| PACP | 2006 | 209 | 9 | 25 | 6.478  | P | 0.200 | 0.687  |
| BBR  | 2006 | 209 | 9 | 25 | 6.998  | P | 0.200 | 0.471  |
| SAO  | 2006 | 209 | 9 | 25 | 8.012  | P | 0.200 | 0.393  |
| SVD  | 2006 | 209 | 9 | 25 | 8.168  | P | 0.200 | 0.392  |
| BFS  | 2006 | 209 | 9 | 25 | 9.187  | P | 0.200 | 0.020  |
| PKD  | 2006 | 209 | 9 | 25 | 9.203  | P | 0.200 | -0.128 |
| VCS  | 2006 | 209 | 9 | 25 | 9.634  | P | 0.200 | 0.309  |
| CHF  | 2006 | 209 | 9 | 25 | 10.156 | P | 0.200 | 0.361  |
| MWC  | 2006 | 209 | 9 | 25 | 10.474 | P | 0.200 | -0.084 |
| PAS  | 2006 | 209 | 9 | 25 | 10.721 | P | 0.200 | -0.488 |
| RAMR | 2006 | 209 | 9 | 25 | 12.052 | P | 0.200 | -0.041 |
| MPP  | 2006 | 209 | 9 | 25 | 12.880 | P | 0.200 | 0.124  |
| CIA  | 2006 | 209 | 9 | 25 | 16.110 | P | 0.200 | 0.038  |

|      |      |     |    |        |          |          |         |        |        |
|------|------|-----|----|--------|----------|----------|---------|--------|--------|
| 2006 | 266  | 7   | 20 | 4.8196 | 70.91800 | -6.25700 | 18.1000 | 220    | -0.009 |
| J05A | 2006 | 266 | 7  | 29     | 50.184   | P        | 0.200   | 1.003  |        |
| K05A | 2006 | 266 | 7  | 29     | 53.260   | P        | 0.200   | 0.903  |        |
| L07A | 2006 | 266 | 7  | 29     | 54.151   | P        | 0.200   | 0.092  |        |
| K04A | 2006 | 266 | 7  | 29     | 54.532   | P        | 0.200   | 0.076  |        |
| L05A | 2006 | 266 | 7  | 29     | 57.178   | P        | 0.200   | 0.556  |        |
| L04A | 2006 | 266 | 7  | 29     | 57.462   | P        | 0.200   | -0.170 |        |
| M07A | 2006 | 266 | 7  | 29     | 58.180   | P        | 0.200   | 0.436  |        |
| N08A | 2006 | 266 | 7  | 29     | 59.858   | P        | 0.200   | -0.093 |        |
| BMN  | 2006 | 266 | 7  | 30     | 0.009    | P        | 0.200   | -0.419 |        |
| N07B | 2006 | 266 | 7  | 30     | 1.539    | P        | 0.200   | 0.077  |        |
| M05C | 2006 | 266 | 7  | 30     | 1.762    | P        | 0.200   | 0.104  |        |
| M06C | 2006 | 266 | 7  | 30     | 1.801    | P        | 0.200   | 0.334  |        |
| O09A | 2006 | 266 | 7  | 30     | 2.106    | P        | 0.200   | 0.064  |        |
| N06A | 2006 | 266 | 7  | 30     | 3.247    | P        | 0.200   | 0.010  |        |
| O08A | 2006 | 266 | 7  | 30     | 3.299    | P        | 0.200   | 0.069  |        |
| M02C | 2006 | 266 | 7  | 30     | 3.920    | P        | 0.200   | -0.553 |        |
| O07A | 2006 | 266 | 7  | 30     | 5.490    | P        | 0.200   | 0.266  |        |
| P09A | 2006 | 266 | 7  | 30     | 5.824    | P        | 0.200   | -0.270 |        |
| ELFS | 2006 | 266 | 7  | 30     | 5.984    | P        | 0.200   | 0.146  |        |
| P08A | 2006 | 266 | 7  | 30     | 6.975    | P        | 0.200   | 0.253  |        |
| O06A | 2006 | 266 | 7  | 30     | 7.178    | P        | 0.200   | 0.245  |        |
| SNE9 | 2006 | 266 | 7  | 30     | 8.246    | P        | 0.200   | -0.382 |        |
| Q11A | 2006 | 266 | 7  | 30     | 7.747    | P        | 0.200   | 0.070  |        |
| SNF9 | 2006 | 266 | 7  | 30     | 8.821    | P        | 0.200   | 0.747  |        |
| WDC  | 2006 | 266 | 7  | 30     | 7.949    | P        | 0.200   | -1.133 |        |

|      |      |     |   |    |        |   |       |        |
|------|------|-----|---|----|--------|---|-------|--------|
| O04C | 2006 | 266 | 7 | 30 | 8.322  | P | 0.200 | -0.060 |
| BEK  | 2006 | 266 | 7 | 30 | 9.684  | P | 0.200 | -0.298 |
| P07A | 2006 | 266 | 7 | 30 | 9.889  | P | 0.200 | 0.596  |
| SNE7 | 2006 | 266 | 7 | 30 | 10.983 | P | 0.200 | -0.129 |
| SND8 | 2006 | 266 | 7 | 30 | 11.087 | P | 0.200 | -0.147 |
| P06A | 2006 | 266 | 7 | 30 | 10.207 | P | 0.200 | -0.192 |
| O05C | 2006 | 266 | 7 | 30 | 10.335 | P | 0.200 | -0.028 |
| Q09A | 2006 | 266 | 7 | 30 | 10.488 | P | 0.200 | -0.260 |
| SND7 | 2006 | 266 | 7 | 30 | 11.891 | P | 0.200 | -0.116 |
| SNG5 | 2006 | 266 | 7 | 30 | 12.303 | P | 0.200 | -0.701 |
| Q08A | 2006 | 266 | 7 | 30 | 11.630 | P | 0.200 | -0.257 |
| SNE6 | 2006 | 266 | 7 | 30 | 12.976 | P | 0.200 | -0.326 |
| SNC7 | 2006 | 266 | 7 | 30 | 13.397 | P | 0.200 | -0.391 |
| SNA8 | 2006 | 266 | 7 | 30 | 13.815 | P | 0.200 | 0.131  |
| WCN  | 2006 | 266 | 7 | 30 | 12.826 | P | 0.200 | 0.191  |
| ORV  | 2006 | 266 | 7 | 30 | 13.165 | P | 0.200 | -0.649 |
| SND5 | 2006 | 266 | 7 | 30 | 14.507 | P | 0.200 | -0.725 |
| P05C | 2006 | 266 | 7 | 30 | 13.873 | P | 0.200 | -0.217 |
| R09A | 2006 | 266 | 7 | 30 | 13.898 | P | 0.200 | -0.326 |
| SNA7 | 2006 | 266 | 7 | 30 | 14.918 | P | 0.200 | 0.066  |
| SNE4 | 2006 | 266 | 7 | 30 | 14.936 | P | 0.200 | -0.745 |
| SNC6 | 2006 | 266 | 7 | 30 | 14.990 | P | 0.200 | -0.212 |
| SNC5 | 2006 | 266 | 7 | 30 | 15.504 | P | 0.200 | -0.447 |
| SN97 | 2006 | 266 | 7 | 30 | 14.933 | P | 0.200 | -0.877 |
| TPH  | 2006 | 266 | 7 | 30 | 15.086 | P | 0.200 | -0.583 |
| SUTB | 2006 | 266 | 7 | 30 | 15.269 | P | 0.200 | -1.139 |
| SNB5 | 2006 | 266 | 7 | 30 | 16.519 | P | 0.200 | -0.522 |
| SNC4 | 2006 | 266 | 7 | 30 | 16.609 | P | 0.200 | -0.811 |
| SND4 | 2006 | 266 | 7 | 30 | 15.744 | P | 0.200 | -0.817 |
| R05C | 2006 | 266 | 7 | 30 | 16.956 | P | 0.200 | -0.199 |
| LAVA | 2006 | 266 | 7 | 30 | 16.975 | P | 0.200 | -0.775 |
| R06C | 2006 | 266 | 7 | 30 | 17.267 | P | 0.200 | 0.231  |
| S09A | 2006 | 266 | 7 | 30 | 17.330 | P | 0.200 | -0.565 |
| SNA4 | 2006 | 266 | 7 | 30 | 18.526 | P | 0.200 | -0.568 |
| SNB3 | 2006 | 266 | 7 | 30 | 18.715 | P | 0.200 | -0.525 |
| SN96 | 2006 | 266 | 7 | 30 | 18.402 | P | 0.200 | 0.015  |
| SNA3 | 2006 | 266 | 7 | 30 | 19.453 | P | 0.200 | -0.637 |
| R07C | 2006 | 266 | 7 | 30 | 19.344 | P | 0.200 | 0.339  |
| SN55 | 2006 | 266 | 7 | 30 | 21.503 | P | 0.200 | 0.541  |
| SN93 | 2006 | 266 | 7 | 30 | 20.928 | P | 0.200 | -0.238 |
| R04C | 2006 | 266 | 7 | 30 | 21.060 | P | 0.200 | 0.040  |
| CMB  | 2006 | 266 | 7 | 30 | 21.086 | P | 0.200 | -0.641 |
| S06C | 2006 | 266 | 7 | 30 | 21.832 | P | 0.200 | 0.164  |
| U11A | 2006 | 266 | 7 | 30 | 23.157 | P | 0.200 | 0.600  |
| SN43 | 2006 | 266 | 7 | 30 | 24.894 | P | 0.200 | 0.727  |
| FUR  | 2006 | 266 | 7 | 30 | 24.828 | P | 0.200 | -0.072 |
| S05C | 2006 | 266 | 7 | 30 | 25.950 | P | 0.200 | 0.231  |
| V11A | 2006 | 266 | 7 | 30 | 26.734 | P | 0.200 | 0.450  |
| T06C | 2006 | 266 | 7 | 30 | 26.920 | P | 0.200 | 0.165  |
| S04C | 2006 | 266 | 7 | 30 | 26.934 | P | 0.200 | 0.354  |
| SHO  | 2006 | 266 | 7 | 30 | 27.747 | P | 0.200 | 0.365  |
| HELL | 2006 | 266 | 7 | 30 | 28.081 | P | 0.200 | 0.409  |
| CWC  | 2006 | 266 | 7 | 30 | 28.112 | P | 0.200 | 0.563  |
| MPM  | 2006 | 266 | 7 | 30 | 29.269 | P | 0.200 | 0.268  |
| SLA  | 2006 | 266 | 7 | 30 | 29.986 | P | 0.200 | 0.555  |
| RCT  | 2006 | 266 | 7 | 30 | 29.991 | P | 0.200 | -0.428 |
| PACP | 2006 | 266 | 7 | 30 | 30.347 | P | 0.200 | 0.714  |
| GSC  | 2006 | 266 | 7 | 30 | 32.784 | P | 0.200 | 0.470  |
| LRL  | 2006 | 266 | 7 | 30 | 33.049 | P | 0.200 | 0.217  |
| ISA  | 2006 | 266 | 7 | 30 | 33.459 | P | 0.200 | 0.404  |
| VES  | 2006 | 266 | 7 | 30 | 34.059 | P | 0.200 | 1.010  |
| HEC  | 2006 | 266 | 7 | 30 | 34.601 | P | 0.200 | 0.227  |
| PKD  | 2006 | 266 | 7 | 30 | 35.331 | P | 0.200 | 0.219  |

|      |      |     |   |    |        |   |       |        |
|------|------|-----|---|----|--------|---|-------|--------|
| EDW2 | 2006 | 266 | 7 | 30 | 37.448 | P | 0.200 | 0.448  |
| VTV  | 2006 | 266 | 7 | 30 | 38.265 | P | 0.200 | 0.397  |
| BBR  | 2006 | 266 | 7 | 30 | 39.607 | P | 0.200 | 0.583  |
| VCS  | 2006 | 266 | 7 | 30 | 40.286 | P | 0.200 | 0.445  |
| BFS  | 2006 | 266 | 7 | 30 | 40.460 | P | 0.200 | -0.067 |
| OSI  | 2006 | 266 | 7 | 30 | 40.578 | P | 0.200 | 0.654  |
| CHF  | 2006 | 266 | 7 | 30 | 40.997 | P | 0.200 | 0.486  |
| MWC  | 2006 | 266 | 7 | 30 | 41.433 | P | 0.200 | 0.115  |
| PAS  | 2006 | 266 | 7 | 30 | 41.653 | P | 0.200 | -0.130 |

|      |   |   |    |         |          |         |         |     |        |
|------|---|---|----|---------|----------|---------|---------|-----|--------|
| 2007 | 7 | 1 | 50 | 54.4064 | 61.90600 | 1.17100 | 10.0000 | 302 | -0.005 |
|------|---|---|----|---------|----------|---------|---------|-----|--------|

|      |      |   |   |   |        |   |       |        |
|------|------|---|---|---|--------|---|-------|--------|
| J05A | 2007 | 7 | 2 | 1 | 37.550 | P | 0.200 | 0.908  |
| K05A | 2007 | 7 | 2 | 1 | 39.896 | P | 0.200 | 0.610  |
| L07A | 2007 | 7 | 2 | 1 | 40.067 | P | 0.200 | 0.027  |
| M07A | 2007 | 7 | 2 | 1 | 43.396 | P | 0.200 | 0.230  |
| L04A | 2007 | 7 | 2 | 1 | 44.057 | P | 0.200 | -0.329 |
| N08A | 2007 | 7 | 2 | 1 | 44.394 | P | 0.200 | -0.214 |
| O09A | 2007 | 7 | 2 | 1 | 45.922 | P | 0.200 | 0.014  |
| N07B | 2007 | 7 | 2 | 1 | 46.414 | P | 0.200 | 0.058  |
| M04C | 2007 | 7 | 2 | 1 | 46.469 | P | 0.200 | -0.235 |
| M06C | 2007 | 7 | 2 | 1 | 47.372 | P | 0.200 | 0.290  |
| O08A | 2007 | 7 | 2 | 1 | 47.549 | P | 0.200 | 0.073  |
| M05C | 2007 | 7 | 2 | 1 | 47.628 | P | 0.200 | 0.048  |
| P10A | 2007 | 7 | 2 | 1 | 47.841 | P | 0.200 | 0.363  |
| N06A | 2007 | 7 | 2 | 1 | 48.285 | P | 0.200 | -0.023 |
| P09A | 2007 | 7 | 2 | 1 | 49.380 | P | 0.200 | -0.072 |
| M03C | 2007 | 7 | 2 | 1 | 49.574 | P | 0.200 | -0.430 |
| O07A | 2007 | 7 | 2 | 1 | 49.846 | P | 0.200 | 0.284  |
| Q11A | 2007 | 7 | 2 | 1 | 49.967 | P | 0.200 | -0.028 |
| M02C | 2007 | 7 | 2 | 1 | 50.080 | P | 0.200 | -0.734 |
| ELFS | 2007 | 7 | 2 | 1 | 51.207 | P | 0.200 | 0.159  |
| HATC | 2007 | 7 | 2 | 1 | 51.346 | P | 0.200 | 0.103  |
| O06A | 2007 | 7 | 2 | 1 | 51.853 | P | 0.200 | 0.316  |
| SNE9 | 2007 | 7 | 2 | 1 | 53.209 | P | 0.200 | -0.015 |
| Q09A | 2007 | 7 | 2 | 1 | 53.237 | P | 0.200 | -0.298 |
| O04C | 2007 | 7 | 2 | 1 | 53.405 | P | 0.200 | -0.060 |
| SNF9 | 2007 | 7 | 2 | 1 | 53.463 | P | 0.200 | 0.611  |
| WDC  | 2007 | 7 | 2 | 1 | 53.650 | P | 0.200 | -1.073 |
| P07A | 2007 | 7 | 2 | 1 | 53.756 | P | 0.200 | 0.589  |
| SND9 | 2007 | 7 | 2 | 1 | 54.166 | P | 0.200 | 0.180  |
| BEK  | 2007 | 7 | 2 | 1 | 54.218 | P | 0.200 | -0.301 |
| SNF8 | 2007 | 7 | 2 | 1 | 54.288 | P | 0.200 | -0.036 |
| Q08A | 2007 | 7 | 2 | 1 | 54.479 | P | 0.200 | -0.466 |
| P06A | 2007 | 7 | 2 | 1 | 54.668 | P | 0.200 | 0.023  |
| SNG7 | 2007 | 7 | 2 | 1 | 54.682 | P | 0.200 | -0.121 |
| N02C | 2007 | 7 | 2 | 1 | 54.903 | P | 0.200 | -0.159 |
| R10A | 2007 | 7 | 2 | 1 | 54.910 | P | 0.200 | 0.314  |
| O05C | 2007 | 7 | 2 | 1 | 54.943 | P | 0.200 | -0.157 |
| SND8 | 2007 | 7 | 2 | 1 | 55.215 | P | 0.200 | -0.350 |
| SNE7 | 2007 | 7 | 2 | 1 | 55.364 | P | 0.200 | -0.314 |
| R09A | 2007 | 7 | 2 | 1 | 55.891 | P | 0.200 | -0.624 |
| SNB9 | 2007 | 7 | 2 | 1 | 56.025 | P | 0.200 | 0.154  |
| SND7 | 2007 | 7 | 2 | 1 | 56.045 | P | 0.200 | -0.346 |
| SNC8 | 2007 | 7 | 2 | 1 | 56.186 | P | 0.200 | 0.026  |
| SNF6 | 2007 | 7 | 2 | 1 | 56.493 | P | 0.200 | -0.528 |
| WCN  | 2007 | 7 | 2 | 1 | 56.752 | P | 0.200 | 0.192  |
| SNG5 | 2007 | 7 | 2 | 1 | 56.880 | P | 0.200 | -0.831 |
| TPH  | 2007 | 7 | 2 | 1 | 57.197 | P | 0.200 | -0.685 |
| SNE6 | 2007 | 7 | 2 | 1 | 57.337 | P | 0.200 | -0.307 |
| SNC7 | 2007 | 7 | 2 | 1 | 57.507 | P | 0.200 | -0.393 |
| SNA8 | 2007 | 7 | 2 | 1 | 57.586 | P | 0.200 | 0.175  |
| ORV  | 2007 | 7 | 2 | 1 | 57.657 | P | 0.200 | -0.749 |
| SNE5 | 2007 | 7 | 2 | 1 | 57.827 | P | 0.200 | -0.945 |

|      |      |   |   |   |        |   |       |        |
|------|------|---|---|---|--------|---|-------|--------|
| P05C | 2007 | 7 | 2 | 1 | 57.983 | P | 0.200 | -0.260 |
| SN98 | 2007 | 7 | 2 | 1 | 58.199 | P | 0.200 | 0.250  |
| SNA7 | 2007 | 7 | 2 | 1 | 58.652 | P | 0.200 | 0.084  |
| SNC6 | 2007 | 7 | 2 | 1 | 58.944 | P | 0.200 | -0.216 |
| S09A | 2007 | 7 | 2 | 1 | 59.165 | P | 0.200 | -0.652 |
| SNE4 | 2007 | 7 | 2 | 1 | 59.239 | P | 0.200 | -0.725 |
| SNC5 | 2007 | 7 | 2 | 1 | 59.538 | P | 0.200 | -0.391 |
| SUTB | 2007 | 7 | 2 | 1 | 59.730 | P | 0.200 | -1.064 |
| SND4 | 2007 | 7 | 2 | 1 | 59.796 | P | 0.200 | -0.844 |
| SNB5 | 2007 | 7 | 2 | 2 | 0.295  | P | 0.200 | -0.509 |
| SNC4 | 2007 | 7 | 2 | 2 | 0.406  | P | 0.200 | -0.895 |
| R06C | 2007 | 7 | 2 | 2 | 0.495  | P | 0.200 | 0.226  |
| R05C | 2007 | 7 | 2 | 2 | 0.501  | P | 0.200 | -0.189 |
| SNA5 | 2007 | 7 | 2 | 2 | 1.117  | P | 0.200 | -0.265 |
| Q04C | 2007 | 7 | 2 | 2 | 2.089  | P | 0.200 | -0.171 |
| SNB3 | 2007 | 7 | 2 | 2 | 2.250  | P | 0.200 | -0.645 |
| SN85 | 2007 | 7 | 2 | 2 | 2.435  | P | 0.200 | -0.251 |
| P01C | 2007 | 7 | 2 | 2 | 2.703  | P | 0.200 | 0.007  |
| SN95 | 2007 | 7 | 2 | 2 | 2.747  | P | 0.200 | -0.233 |
| SNA3 | 2007 | 7 | 2 | 2 | 2.922  | P | 0.200 | -0.628 |
| SN75 | 2007 | 7 | 2 | 2 | 3.237  | P | 0.200 | 0.208  |
| U11A | 2007 | 7 | 2 | 2 | 3.315  | P | 0.200 | 0.454  |
| SN84 | 2007 | 7 | 2 | 2 | 3.415  | P | 0.200 | -0.285 |
| SN65 | 2007 | 7 | 2 | 2 | 3.891  | P | 0.200 | 0.511  |
| GRA  | 2007 | 7 | 2 | 2 | 3.931  | P | 0.200 | -0.015 |
| SN93 | 2007 | 7 | 2 | 2 | 4.341  | P | 0.200 | -0.074 |
| CMB  | 2007 | 7 | 2 | 2 | 4.347  | P | 0.200 | -0.484 |
| R04C | 2007 | 7 | 2 | 2 | 4.594  | P | 0.200 | 0.154  |
| MNRC | 2007 | 7 | 2 | 2 | 4.735  | P | 0.200 | 0.515  |
| S06C | 2007 | 7 | 2 | 2 | 4.824  | P | 0.200 | 0.337  |
| SN64 | 2007 | 7 | 2 | 2 | 4.891  | P | 0.200 | 0.494  |
| FUR  | 2007 | 7 | 2 | 2 | 5.711  | P | 0.200 | -0.017 |
| SN63 | 2007 | 7 | 2 | 2 | 5.922  | P | 0.200 | 0.448  |
| V11A | 2007 | 7 | 2 | 2 | 6.399  | P | 0.200 | 0.226  |
| SN34 | 2007 | 7 | 2 | 2 | 6.545  | P | 0.200 | 0.802  |
| SN43 | 2007 | 7 | 2 | 2 | 7.067  | P | 0.200 | 0.518  |
| SN14 | 2007 | 7 | 2 | 2 | 7.276  | P | 0.200 | 0.541  |
| CVS  | 2007 | 7 | 2 | 2 | 7.506  | P | 0.200 | 0.391  |
| SHO  | 2007 | 7 | 2 | 2 | 7.995  | P | 0.200 | 0.427  |
| S05C | 2007 | 7 | 2 | 2 | 8.611  | P | 0.200 | 0.353  |
| T06C | 2007 | 7 | 2 | 2 | 8.992  | P | 0.200 | 0.134  |
| CWC  | 2007 | 7 | 2 | 2 | 9.159  | P | 0.200 | 0.429  |
| HELL | 2007 | 7 | 2 | 2 | 9.749  | P | 0.200 | 0.425  |
| TUQ  | 2007 | 7 | 2 | 2 | 9.763  | P | 0.200 | 0.353  |
| MPM  | 2007 | 7 | 2 | 2 | 9.934  | P | 0.200 | 0.197  |
| SLA  | 2007 | 7 | 2 | 2 | 10.505 | P | 0.200 | 0.558  |
| RCT  | 2007 | 7 | 2 | 2 | 11.334 | P | 0.200 | -0.533 |
| GSC  | 2007 | 7 | 2 | 2 | 12.742 | P | 0.200 | 0.519  |
| LRL  | 2007 | 7 | 2 | 2 | 13.476 | P | 0.200 | 0.296  |
| ISA  | 2007 | 7 | 2 | 2 | 14.174 | P | 0.200 | 0.394  |
| HEC  | 2007 | 7 | 2 | 2 | 14.337 | P | 0.200 | 0.551  |
| VES  | 2007 | 7 | 2 | 2 | 15.047 | P | 0.200 | 0.938  |
| EDW2 | 2007 | 7 | 2 | 2 | 17.461 | P | 0.200 | 0.500  |
| BBR  | 2007 | 7 | 2 | 2 | 18.949 | P | 0.200 | 0.759  |
| SVD  | 2007 | 7 | 2 | 2 | 19.627 | P | 0.200 | 0.446  |
| BFS  | 2007 | 7 | 2 | 2 | 19.973 | P | 0.200 | 0.076  |
| VCS  | 2007 | 7 | 2 | 2 | 20.183 | P | 0.200 | 0.629  |
| MWC  | 2007 | 7 | 2 | 2 | 21.062 | P | 0.200 | 0.271  |

|      |      |     |   |         |          |           |         |        |       |
|------|------|-----|---|---------|----------|-----------|---------|--------|-------|
| 1988 | 224  | 3   | 5 | 42.9764 | 49.19500 | -28.36100 | 10.0000 | 425    | 0.000 |
| arc  | 1988 | 224 | 3 | 16      | 15.100   | P         | 0.200   | -0.017 |       |
| bmd  | 1988 | 224 | 3 | 16      | 15.880   | P         | 0.200   | 0.161  |       |
| ccr  | 1988 | 224 | 3 | 16      | 13.820   | P         | 0.200   | -0.293 |       |



|     |      |     |   |    |        |   |       |        |
|-----|------|-----|---|----|--------|---|-------|--------|
| jhn | 1988 | 224 | 3 | 16 | 16.100 | P | 0.200 | 0.138  |
| jun | 1988 | 224 | 3 | 16 | 12.330 | P | 0.200 | -0.530 |
| twr | 1988 | 224 | 3 | 16 | 13.330 | P | 0.200 | -0.512 |
| DTP | 1988 | 224 | 3 | 16 | 16.750 | P | 0.200 | 0.331  |
| LRM | 1988 | 224 | 3 | 16 | 14.880 | P | 0.200 | 0.020  |
| TOW | 1988 | 224 | 3 | 16 | 14.000 | P | 0.200 | 0.472  |
| WBM | 1988 | 224 | 3 | 16 | 15.200 | P | 0.200 | 0.191  |
| WSC | 1988 | 224 | 3 | 16 | 14.560 | P | 0.200 | 0.038  |

|      |     |    |    |        |          |           |         |     |        |
|------|-----|----|----|--------|----------|-----------|---------|-----|--------|
| 1988 | 204 | 21 | 16 | 7.4853 | 39.93200 | -29.59400 | 10.0000 | 412 | -0.001 |
|------|-----|----|----|--------|----------|-----------|---------|-----|--------|

|     |      |     |    |    |        |   |       |        |
|-----|------|-----|----|----|--------|---|-------|--------|
| bmd | 1988 | 204 | 21 | 27 | 2.280  | P | 0.200 | -0.085 |
| mnk | 1988 | 204 | 21 | 27 | 0.920  | P | 0.200 | -0.649 |
| pmt | 1988 | 204 | 21 | 27 | 0.820  | P | 0.200 | -0.365 |
| CLC | 1988 | 204 | 21 | 26 | 59.080 | P | 0.200 | -0.079 |
| LRM | 1988 | 204 | 21 | 27 | 0.760  | P | 0.200 | -0.100 |
| TOW | 1988 | 204 | 21 | 27 | 0.220  | P | 0.200 | 0.343  |
| WBM | 1988 | 204 | 21 | 27 | 1.280  | P | 0.200 | 0.046  |
| WBS | 1988 | 204 | 21 | 27 | 2.640  | P | 0.200 | -0.058 |
| WCH | 1988 | 204 | 21 | 27 | 1.400  | P | 0.200 | 0.185  |
| WCX | 1988 | 204 | 21 | 26 | 59.300 | P | 0.200 | -0.240 |
| WLH | 1988 | 204 | 21 | 27 | 1.360  | P | 0.200 | -0.077 |
| WOF | 1988 | 204 | 21 | 27 | 4.810  | P | 0.200 | -0.170 |
| WRC | 1988 | 204 | 21 | 26 | 58.940 | P | 0.200 | -0.115 |
| WSC | 1988 | 204 | 21 | 27 | 0.720  | P | 0.200 | -0.100 |
| WVP | 1988 | 204 | 21 | 26 | 59.910 | P | 0.200 | 0.049  |
| XMS | 1988 | 204 | 21 | 26 | 59.230 | P | 0.200 | 0.103  |
| BLK | 1988 | 204 | 21 | 27 | 0.330  | P | 0.200 | 0.333  |
| BMT | 1988 | 204 | 21 | 27 | 6.140  | P | 0.200 | 0.142  |
| DTP | 1988 | 204 | 21 | 27 | 2.280  | P | 0.200 | -0.001 |
| GSC | 1988 | 204 | 21 | 26 | 57.840 | P | 0.200 | 0.301  |
| HOD | 1988 | 204 | 21 | 27 | 1.160  | P | 0.200 | 0.153  |
| JFS | 1988 | 204 | 21 | 27 | 1.280  | P | 0.200 | 0.023  |
| WJP | 1988 | 204 | 21 | 27 | 4.830  | P | 0.200 | 0.362  |

|      |     |   |    |        |          |           |         |   |       |
|------|-----|---|----|--------|----------|-----------|---------|---|-------|
| 2005 | 187 | 3 | 48 | 0.4392 | 55.59300 | -35.15000 | 10.0000 | 4 | 0.000 |
|------|-----|---|----|--------|----------|-----------|---------|---|-------|

|      |      |     |   |    |        |   |       |        |
|------|------|-----|---|----|--------|---|-------|--------|
| BMN  | 2005 | 187 | 3 | 57 | 22.665 | P | 0.200 | 0.296  |
| M06C | 2005 | 187 | 3 | 57 | 31.170 | P | 0.200 | 0.421  |
| TPH  | 2005 | 187 | 3 | 57 | 34.516 | P | 0.200 | -0.325 |
| O04C | 2005 | 187 | 3 | 57 | 37.557 | P | 0.200 | -0.212 |
| O05C | 2005 | 187 | 3 | 57 | 38.857 | P | 0.200 | -0.068 |
| SN38 | 2005 | 187 | 3 | 57 | 38.944 | P | 0.200 | -0.374 |
| SN28 | 2005 | 187 | 3 | 57 | 38.962 | P | 0.200 | -0.390 |
| SN48 | 2005 | 187 | 3 | 57 | 39.059 | P | 0.200 | -0.409 |
| GRA  | 2005 | 187 | 3 | 57 | 40.874 | P | 0.200 | 0.018  |
| SN47 | 2005 | 187 | 3 | 57 | 41.009 | P | 0.200 | -0.155 |
| SN37 | 2005 | 187 | 3 | 57 | 41.069 | P | 0.200 | -0.182 |
| P05C | 2005 | 187 | 3 | 57 | 41.259 | P | 0.200 | -0.066 |
| FUR  | 2005 | 187 | 3 | 57 | 41.579 | P | 0.200 | -0.062 |
| SHO  | 2005 | 187 | 3 | 57 | 42.205 | P | 0.200 | -0.145 |
| ORV  | 2005 | 187 | 3 | 57 | 42.325 | P | 0.200 | -0.767 |
| TUQ  | 2005 | 187 | 3 | 57 | 43.347 | P | 0.200 | -0.192 |
| LAVA | 2005 | 187 | 3 | 57 | 44.032 | P | 0.200 | -0.572 |
| Q04C | 2005 | 187 | 3 | 57 | 46.123 | P | 0.200 | -0.305 |
| MPM  | 2005 | 187 | 3 | 57 | 46.552 | P | 0.200 | -0.015 |
| CMB  | 2005 | 187 | 3 | 57 | 46.596 | P | 0.200 | -0.444 |
| CWC  | 2005 | 187 | 3 | 57 | 46.802 | P | 0.200 | 0.138  |
| SN53 | 2005 | 187 | 3 | 57 | 47.704 | P | 0.200 | 0.544  |
| GSC  | 2005 | 187 | 3 | 57 | 47.819 | P | 0.200 | 0.097  |
| SN23 | 2005 | 187 | 3 | 57 | 48.066 | P | 0.200 | 0.582  |
| SN62 | 2005 | 187 | 3 | 57 | 48.157 | P | 0.200 | 0.296  |
| SN42 | 2005 | 187 | 3 | 57 | 48.547 | P | 0.200 | 0.375  |
| SN52 | 2005 | 187 | 3 | 57 | 48.733 | P | 0.200 | 0.345  |
| SN71 | 2005 | 187 | 3 | 57 | 49.174 | P | 0.200 | 0.097  |

|      |      |     |   |    |        |   |       |        |
|------|------|-----|---|----|--------|---|-------|--------|
| HELL | 2005 | 187 | 3 | 57 | 49.225 | P | 0.200 | 0.331  |
| SN11 | 2005 | 187 | 3 | 57 | 49.269 | P | 0.200 | -0.533 |
| T06C | 2005 | 187 | 3 | 57 | 49.749 | P | 0.200 | 0.082  |
| SN51 | 2005 | 187 | 3 | 57 | 49.921 | P | 0.200 | 0.081  |
| S05C | 2005 | 187 | 3 | 57 | 50.551 | P | 0.200 | 0.352  |
| RCT  | 2005 | 187 | 3 | 57 | 50.984 | P | 0.200 | -0.680 |
| ISA  | 2005 | 187 | 3 | 57 | 52.798 | P | 0.200 | 0.590  |
| VES  | 2005 | 187 | 3 | 57 | 52.975 | P | 0.200 | -0.539 |
| BBR  | 2005 | 187 | 3 | 57 | 54.403 | P | 0.200 | 0.642  |
| EDW2 | 2005 | 187 | 3 | 57 | 54.789 | P | 0.200 | 0.336  |
| PACP | 2005 | 187 | 3 | 57 | 56.397 | P | 0.200 | 0.756  |
| BFS  | 2005 | 187 | 3 | 57 | 56.796 | P | 0.200 | 0.097  |
| PKD  | 2005 | 187 | 3 | 57 | 58.496 | P | 0.200 | -0.042 |

|      |     |   |   |         |          |           |         |     |        |
|------|-----|---|---|---------|----------|-----------|---------|-----|--------|
| 2006 | 126 | 7 | 9 | 24.1483 | 43.59700 | -32.44800 | 10.0000 | 126 | -0.014 |
|------|-----|---|---|---------|----------|-----------|---------|-----|--------|

|      |      |     |   |    |        |   |       |        |
|------|------|-----|---|----|--------|---|-------|--------|
| BMN  | 2006 | 126 | 7 | 19 | 33.472 | P | 0.200 | 0.103  |
| O09A | 2006 | 126 | 7 | 19 | 34.536 | P | 0.200 | 0.330  |
| N08A | 2006 | 126 | 7 | 19 | 36.228 | P | 0.200 | 0.186  |
| P09A | 2006 | 126 | 7 | 19 | 36.532 | P | 0.200 | 0.115  |
| O08A | 2006 | 126 | 7 | 19 | 38.147 | P | 0.200 | 0.090  |
| M07A | 2006 | 126 | 7 | 19 | 38.679 | P | 0.200 | 0.678  |
| Q09A | 2006 | 126 | 7 | 19 | 39.273 | P | 0.200 | -0.088 |
| N07B | 2006 | 126 | 7 | 19 | 39.861 | P | 0.200 | 0.256  |
| O07A | 2006 | 126 | 7 | 19 | 41.534 | P | 0.200 | 0.116  |
| Q08A | 2006 | 126 | 7 | 19 | 41.881 | P | 0.200 | -0.563 |
| TPH  | 2006 | 126 | 7 | 19 | 42.081 | P | 0.200 | -0.393 |
| TPNV | 2006 | 126 | 7 | 19 | 42.111 | P | 0.200 | -0.381 |
| S09A | 2006 | 126 | 7 | 19 | 43.197 | P | 0.200 | -0.585 |
| R08A | 2006 | 126 | 7 | 19 | 44.514 | P | 0.200 | -0.652 |
| M06C | 2006 | 126 | 7 | 19 | 45.120 | P | 0.200 | 0.895  |
| O06A | 2006 | 126 | 7 | 19 | 45.800 | P | 0.200 | 0.374  |
| SN28 | 2006 | 126 | 7 | 19 | 46.637 | P | 0.200 | -0.551 |
| SHO  | 2006 | 126 | 7 | 19 | 46.658 | P | 0.200 | 0.239  |
| GRA  | 2006 | 126 | 7 | 19 | 46.842 | P | 0.200 | -0.209 |
| SN38 | 2006 | 126 | 7 | 19 | 46.881 | P | 0.200 | -0.571 |
| M05C | 2006 | 126 | 7 | 19 | 46.901 | P | 0.200 | 0.530  |
| TUQ  | 2006 | 126 | 7 | 19 | 47.355 | P | 0.200 | 0.564  |
| SN48 | 2006 | 126 | 7 | 19 | 47.410 | P | 0.200 | -0.463 |
| M04C | 2006 | 126 | 7 | 19 | 47.671 | P | 0.200 | -0.052 |
| S08C | 2006 | 126 | 7 | 19 | 48.589 | P | 0.200 | -0.429 |
| SN37 | 2006 | 126 | 7 | 19 | 48.823 | P | 0.200 | -0.325 |
| BEK  | 2006 | 126 | 7 | 19 | 48.937 | P | 0.200 | -0.045 |
| SN47 | 2006 | 126 | 7 | 19 | 49.179 | P | 0.200 | -0.233 |
| R06C | 2006 | 126 | 7 | 19 | 49.409 | P | 0.200 | -1.018 |
| SN57 | 2006 | 126 | 7 | 19 | 49.564 | P | 0.200 | -0.224 |
| SN67 | 2006 | 126 | 7 | 19 | 49.648 | P | 0.200 | -0.395 |
| HATC | 2006 | 126 | 7 | 19 | 50.102 | P | 0.200 | 0.383  |
| TIN  | 2006 | 126 | 7 | 19 | 50.725 | P | 0.200 | 0.032  |
| SN16 | 2006 | 126 | 7 | 19 | 50.783 | P | 0.200 | 1.079  |
| O05C | 2006 | 126 | 7 | 19 | 51.005 | P | 0.200 | 0.177  |
| SN46 | 2006 | 126 | 7 | 19 | 51.034 | P | 0.200 | 0.103  |
| YBH  | 2006 | 126 | 7 | 19 | 51.065 | P | 0.200 | -0.261 |
| HEC  | 2006 | 126 | 7 | 19 | 51.354 | P | 0.200 | 0.314  |
| SN15 | 2006 | 126 | 7 | 19 | 51.499 | P | 0.200 | -0.159 |
| SN25 | 2006 | 126 | 7 | 19 | 51.535 | P | 0.200 | -0.134 |
| GSC  | 2006 | 126 | 7 | 19 | 51.687 | P | 0.200 | 0.463  |
| MPM  | 2006 | 126 | 7 | 19 | 51.733 | P | 0.200 | 0.210  |
| P05C | 2006 | 126 | 7 | 19 | 52.266 | P | 0.200 | 0.055  |
| CWC  | 2006 | 126 | 7 | 19 | 52.419 | P | 0.200 | -0.003 |
| SN55 | 2006 | 126 | 7 | 19 | 52.452 | P | 0.200 | 0.038  |
| ORV  | 2006 | 126 | 7 | 19 | 54.157 | P | 0.200 | -0.578 |
| LAVA | 2006 | 126 | 7 | 19 | 54.296 | P | 0.200 | -0.529 |
| LRL  | 2006 | 126 | 7 | 19 | 54.637 | P | 0.200 | 0.145  |

|      |      |     |   |    |        |   |       |        |
|------|------|-----|---|----|--------|---|-------|--------|
| S06C | 2006 | 126 | 7 | 19 | 54.891 | P | 0.200 | 0.510  |
| SN53 | 2006 | 126 | 7 | 19 | 55.485 | P | 0.200 | 0.279  |
| HELL | 2006 | 126 | 7 | 19 | 55.600 | P | 0.200 | 0.131  |
| SN11 | 2006 | 126 | 7 | 19 | 55.714 | P | 0.200 | -0.838 |
| SUTB | 2006 | 126 | 7 | 19 | 55.956 | P | 0.200 | -1.136 |
| SN73 | 2006 | 126 | 7 | 19 | 56.131 | P | 0.200 | 0.328  |
| SN62 | 2006 | 126 | 7 | 19 | 56.395 | P | 0.200 | 0.259  |
| SN52 | 2006 | 126 | 7 | 19 | 56.547 | P | 0.200 | 0.308  |
| BBR  | 2006 | 126 | 7 | 19 | 56.567 | P | 0.200 | 0.575  |
| SN21 | 2006 | 126 | 7 | 19 | 56.901 | P | 0.200 | -0.041 |
| ISA  | 2006 | 126 | 7 | 19 | 57.660 | P | 0.200 | 0.515  |
| SN71 | 2006 | 126 | 7 | 19 | 57.722 | P | 0.200 | 0.087  |
| O02C | 2006 | 126 | 7 | 19 | 57.724 | P | 0.200 | 0.050  |
| SN51 | 2006 | 126 | 7 | 19 | 57.829 | P | 0.200 | 0.159  |
| MWC  | 2006 | 126 | 7 | 20 | 0.698  | P | 0.200 | -0.320 |
| S04C | 2006 | 126 | 7 | 20 | 2.482  | P | 0.200 | 0.498  |

|      |      |    |   |         |          |           |         |        |       |
|------|------|----|---|---------|----------|-----------|---------|--------|-------|
| 2006 | 10   | 1  | 9 | 34.9383 | 37.05700 | -14.13300 | 10.0000 | 104    | 0.000 |
| M06C | 2006 | 10 | 1 | 21      | 28.543   | P         | 0.200   | 0.168  |       |
| HUMO | 2006 | 10 | 1 | 21      | 30.058   | P         | 0.200   | -1.302 |       |
| M05C | 2006 | 10 | 1 | 21      | 30.073   | P         | 0.200   | 0.027  |       |
| M04C | 2006 | 10 | 1 | 21      | 30.615   | P         | 0.200   | -0.372 |       |
| SN28 | 2006 | 10 | 1 | 21      | 31.252   | P         | 0.200   | -0.645 |       |
| ELFS | 2006 | 10 | 1 | 21      | 31.321   | P         | 0.200   | -0.050 |       |
| SN38 | 2006 | 10 | 1 | 21      | 31.457   | P         | 0.200   | -0.605 |       |
| SHO  | 2006 | 10 | 1 | 21      | 31.605   | P         | 0.200   | -0.060 |       |
| GRA  | 2006 | 10 | 1 | 21      | 31.719   | P         | 0.200   | -0.245 |       |
| SN48 | 2006 | 10 | 1 | 21      | 31.821   | P         | 0.200   | -0.562 |       |
| FUR  | 2006 | 10 | 1 | 21      | 32.012   | P         | 0.200   | 0.135  |       |
| TUQ  | 2006 | 10 | 1 | 21      | 32.035   | P         | 0.200   | -0.031 |       |
| BEK  | 2006 | 10 | 1 | 21      | 32.343   | P         | 0.200   | -0.375 |       |
| YBH  | 2006 | 10 | 1 | 21      | 32.364   | P         | 0.200   | -1.414 |       |
| HATC | 2006 | 10 | 1 | 21      | 32.812   | P         | 0.200   | -0.093 |       |
| M03C | 2006 | 10 | 1 | 21      | 33.021   | P         | 0.200   | -0.460 |       |
| S08C | 2006 | 10 | 1 | 21      | 33.052   | P         | 0.200   | -0.472 |       |
| O04C | 2006 | 10 | 1 | 21      | 33.201   | P         | 0.200   | -0.375 |       |
| SN37 | 2006 | 10 | 1 | 21      | 33.230   | P         | 0.200   | -0.264 |       |
| SN47 | 2006 | 10 | 1 | 21      | 33.661   | P         | 0.200   | -0.043 |       |
| O05C | 2006 | 10 | 1 | 21      | 33.885   | P         | 0.200   | -0.249 |       |
| SN26 | 2006 | 10 | 1 | 21      | 34.012   | P         | 0.200   | -0.121 |       |
| SN57 | 2006 | 10 | 1 | 21      | 34.176   | P         | 0.200   | 0.240  |       |
| SN36 | 2006 | 10 | 1 | 21      | 34.338   | P         | 0.200   | -0.104 |       |
| M02C | 2006 | 10 | 1 | 21      | 34.423   | P         | 0.200   | -1.064 |       |
| R06C | 2006 | 10 | 1 | 21      | 34.594   | P         | 0.200   | 0.220  |       |
| R07C | 2006 | 10 | 1 | 21      | 34.689   | P         | 0.200   | 0.259  |       |
| TIN  | 2006 | 10 | 1 | 21      | 35.022   | P         | 0.200   | 0.063  |       |
| P05C | 2006 | 10 | 1 | 21      | 35.332   | P         | 0.200   | -0.185 |       |
| WDC  | 2006 | 10 | 1 | 21      | 35.417   | P         | 0.200   | -1.785 |       |
| R05C | 2006 | 10 | 1 | 21      | 35.505   | P         | 0.200   | -0.455 |       |
| SN76 | 2006 | 10 | 1 | 21      | 35.561   | P         | 0.200   | 0.496  |       |
| HEC  | 2006 | 10 | 1 | 21      | 35.612   | P         | 0.200   | -0.122 |       |
| GSC  | 2006 | 10 | 1 | 21      | 35.728   | P         | 0.200   | -0.048 |       |
| SN25 | 2006 | 10 | 1 | 21      | 35.842   | P         | 0.200   | 0.158  |       |
| MPM  | 2006 | 10 | 1 | 21      | 35.977   | P         | 0.200   | 0.044  |       |
| SN15 | 2006 | 10 | 1 | 21      | 36.052   | P         | 0.200   | 0.279  |       |
| CWC  | 2006 | 10 | 1 | 21      | 36.528   | P         | 0.200   | 0.026  |       |
| ORV  | 2006 | 10 | 1 | 21      | 36.535   | P         | 0.200   | -0.884 |       |
| SN55 | 2006 | 10 | 1 | 21      | 36.590   | P         | 0.200   | 0.431  |       |
| LAVA | 2006 | 10 | 1 | 21      | 37.015   | P         | 0.200   | -0.803 |       |
| SN85 | 2006 | 10 | 1 | 21      | 37.077   | P         | 0.200   | 0.153  |       |
| SN34 | 2006 | 10 | 1 | 21      | 37.277   | P         | 0.200   | 0.378  |       |
| SN44 | 2006 | 10 | 1 | 21      | 37.452   | P         | 0.200   | 0.154  |       |
| SN54 | 2006 | 10 | 1 | 21      | 37.650   | P         | 0.200   | 0.406  |       |

|      |      |    |   |    |        |   |       |        |
|------|------|----|---|----|--------|---|-------|--------|
| RRX  | 2006 | 10 | 1 | 21 | 37.946 | P | 0.200 | 0.078  |
| S06C | 2006 | 10 | 1 | 21 | 38.352 | P | 0.200 | 0.656  |
| O02C | 2006 | 10 | 1 | 21 | 38.479 | P | 0.200 | -1.024 |
| SN23 | 2006 | 10 | 1 | 21 | 38.512 | P | 0.200 | 0.281  |
| N02C | 2006 | 10 | 1 | 21 | 38.629 | P | 0.200 | -0.335 |
| SN53 | 2006 | 10 | 1 | 21 | 38.765 | P | 0.200 | 0.269  |
| HELL | 2006 | 10 | 1 | 21 | 38.808 | P | 0.200 | -0.068 |
| CMB  | 2006 | 10 | 1 | 21 | 38.855 | P | 0.200 | -0.191 |
| SN22 | 2006 | 10 | 1 | 21 | 38.901 | P | 0.200 | -0.061 |
| SN21 | 2006 | 10 | 1 | 21 | 39.025 | P | 0.200 | -0.986 |
| SN62 | 2006 | 10 | 1 | 21 | 39.338 | P | 0.200 | 0.169  |
| Q04C | 2006 | 10 | 1 | 21 | 39.455 | P | 0.200 | -0.040 |
| SN52 | 2006 | 10 | 1 | 21 | 39.479 | P | 0.200 | 0.166  |
| T06C | 2006 | 10 | 1 | 21 | 39.812 | P | 0.200 | -0.196 |
| BBR  | 2006 | 10 | 1 | 21 | 40.025 | P | 0.200 | 0.172  |
| SN71 | 2006 | 10 | 1 | 21 | 40.310 | P | 0.200 | -0.093 |
| R04C | 2006 | 10 | 1 | 21 | 40.341 | P | 0.200 | 0.466  |
| SN51 | 2006 | 10 | 1 | 21 | 40.616 | P | 0.200 | 0.084  |
| ISA  | 2006 | 10 | 1 | 21 | 40.889 | P | 0.200 | 0.414  |
| VES  | 2006 | 10 | 1 | 21 | 41.117 | P | 0.200 | -0.866 |
| S05C | 2006 | 10 | 1 | 21 | 41.321 | P | 0.200 | 0.363  |
| EDW2 | 2006 | 10 | 1 | 21 | 41.480 | P | 0.200 | 0.107  |
| BFS  | 2006 | 10 | 1 | 21 | 42.044 | P | 0.200 | -0.473 |
| Q03C | 2006 | 10 | 1 | 21 | 43.324 | P | 0.200 | 0.931  |
| MNRC | 2006 | 10 | 1 | 21 | 43.428 | P | 0.200 | 0.489  |
| U05C | 2006 | 10 | 1 | 21 | 43.955 | P | 0.200 | 0.272  |
| S04C | 2006 | 10 | 1 | 21 | 44.086 | P | 0.200 | 0.206  |
| DEC  | 2006 | 10 | 1 | 21 | 44.135 | P | 0.200 | -0.576 |
| V05C | 2006 | 10 | 1 | 21 | 44.151 | P | 0.200 | -0.529 |
| P01C | 2006 | 10 | 1 | 21 | 44.173 | P | 0.200 | 0.448  |
| T05C | 2006 | 10 | 1 | 21 | 44.726 | P | 0.200 | 1.066  |
| BDM  | 2006 | 10 | 1 | 21 | 44.978 | P | 0.200 | 0.747  |
| CVS  | 2006 | 10 | 1 | 21 | 45.027 | P | 0.200 | 0.384  |
| OSI  | 2006 | 10 | 1 | 21 | 45.042 | P | 0.200 | 0.303  |
| HOPS | 2006 | 10 | 1 | 21 | 45.475 | P | 0.200 | 0.951  |
| WENL | 2006 | 10 | 1 | 21 | 45.611 | P | 0.200 | 0.719  |
| BRIB | 2006 | 10 | 1 | 21 | 45.893 | P | 0.200 | 0.693  |
| BKS  | 2006 | 10 | 1 | 21 | 46.016 | P | 0.200 | 0.463  |
| BRK  | 2006 | 10 | 1 | 21 | 46.109 | P | 0.200 | 0.420  |
| MHC  | 2006 | 10 | 1 | 21 | 46.245 | P | 0.200 | 0.671  |
| PACP | 2006 | 10 | 1 | 21 | 46.302 | P | 0.200 | 0.874  |
| PKD  | 2006 | 10 | 1 | 21 | 46.363 | P | 0.200 | -0.351 |
| U04C | 2006 | 10 | 1 | 21 | 46.810 | P | 0.200 | 0.852  |
| SAO  | 2006 | 10 | 1 | 21 | 47.321 | P | 0.200 | 0.575  |
| MPP  | 2006 | 10 | 1 | 21 | 48.700 | P | 0.200 | 0.940  |
| HAST | 2006 | 10 | 1 | 21 | 48.700 | P | 0.200 | 0.105  |

|      |      |     |    |         |          |           |         |        |       |
|------|------|-----|----|---------|----------|-----------|---------|--------|-------|
| 2006 | 341  | 5   | 20 | 54.3886 | 47.11200 | -27.30100 | 10.0000 | 249    | 0.008 |
| Q11A | 2006 | 341 | 5  | 31      | 13.756   | P         | 0.200   | 0.055  |       |
| O09A | 2006 | 341 | 5  | 31      | 14.916   | P         | 0.200   | 0.688  |       |
| L07A | 2006 | 341 | 5  | 31      | 15.532   | P         | 0.200   | 0.672  |       |
| N08A | 2006 | 341 | 5  | 31      | 15.834   | P         | 0.200   | 0.372  |       |
| J05A | 2006 | 341 | 5  | 31      | 17.177   | P         | 0.200   | 0.572  |       |
| M07A | 2006 | 341 | 5  | 31      | 17.483   | P         | 0.200   | 0.742  |       |
| K05A | 2006 | 341 | 5  | 31      | 18.089   | P         | 0.200   | 0.305  |       |
| N07B | 2006 | 341 | 5  | 31      | 19.019   | P         | 0.200   | 0.313  |       |
| R10A | 2006 | 341 | 5  | 31      | 19.321   | P         | 0.200   | 0.584  |       |
| J04A | 2006 | 341 | 5  | 31      | 19.535   | P         | 0.200   | -0.579 |       |
| Q09A | 2006 | 341 | 5  | 31      | 20.162   | P         | 0.200   | 0.181  |       |
| K04A | 2006 | 341 | 5  | 31      | 20.827   | P         | 0.200   | -0.469 |       |
| L05A | 2006 | 341 | 5  | 31      | 20.833   | P         | 0.200   | 0.464  |       |
| J03A | 2006 | 341 | 5  | 31      | 20.984   | P         | 0.200   | -1.529 |       |
| O07A | 2006 | 341 | 5  | 31      | 21.109   | P         | 0.200   | 0.277  |       |

|      |      |     |   |    |        |   |       |        |
|------|------|-----|---|----|--------|---|-------|--------|
| R09A | 2006 | 341 | 5 | 31 | 22.025 | P | 0.200 | 0.038  |
| Q08A | 2006 | 341 | 5 | 31 | 22.480 | P | 0.200 | -0.300 |
| N06A | 2006 | 341 | 5 | 31 | 22.601 | P | 0.200 | 0.542  |
| M06C | 2006 | 341 | 5 | 31 | 23.053 | P | 0.200 | 0.453  |
| L04A | 2006 | 341 | 5 | 31 | 23.269 | P | 0.200 | -0.517 |
| TPH  | 2006 | 341 | 5 | 31 | 23.336 | P | 0.200 | -0.074 |
| HUMO | 2006 | 341 | 5 | 31 | 23.813 | P | 0.200 | -1.894 |
| M05C | 2006 | 341 | 5 | 31 | 24.581 | P | 0.200 | 0.117  |
| S09A | 2006 | 341 | 5 | 31 | 24.752 | P | 0.200 | -0.122 |
| M04C | 2006 | 341 | 5 | 31 | 24.869 | P | 0.200 | -0.505 |
| O06A | 2006 | 341 | 5 | 31 | 24.984 | P | 0.200 | 0.499  |
| R08A | 2006 | 341 | 5 | 31 | 25.271 | P | 0.200 | -0.418 |
| V11A | 2006 | 341 | 5 | 31 | 25.812 | P | 0.200 | 0.143  |
| K02A | 2006 | 341 | 5 | 31 | 25.832 | P | 0.200 | -1.335 |
| ELFS | 2006 | 341 | 5 | 31 | 26.437 | P | 0.200 | 0.248  |
| SND8 | 2006 | 341 | 5 | 31 | 28.431 | P | 0.200 | -0.050 |
| U10A | 2006 | 341 | 5 | 31 | 27.516 | P | 0.200 | 0.767  |
| SNA8 | 2006 | 341 | 5 | 31 | 28.563 | P | 0.200 | 0.034  |
| M03C | 2006 | 341 | 5 | 31 | 27.825 | P | 0.200 | -0.645 |
| BEK  | 2006 | 341 | 5 | 31 | 27.913 | P | 0.200 | -0.092 |
| WCN  | 2006 | 341 | 5 | 31 | 28.326 | P | 0.200 | 0.119  |
| GRA  | 2006 | 341 | 5 | 31 | 28.549 | P | 0.200 | 0.163  |
| FUR  | 2006 | 341 | 5 | 31 | 28.911 | P | 0.200 | 0.336  |
| SHO  | 2006 | 341 | 5 | 31 | 28.983 | P | 0.200 | 0.357  |
| SNC7 | 2006 | 341 | 5 | 31 | 30.605 | P | 0.200 | -0.053 |
| S08C | 2006 | 341 | 5 | 31 | 29.681 | P | 0.200 | -0.171 |
| TUQ  | 2006 | 341 | 5 | 31 | 29.853 | P | 0.200 | 0.541  |
| SNB7 | 2006 | 341 | 5 | 31 | 30.942 | P | 0.200 | 0.158  |
| R06C | 2006 | 341 | 5 | 31 | 29.995 | P | 0.200 | -0.371 |
| SNF6 | 2006 | 341 | 5 | 31 | 31.060 | P | 0.200 | -0.485 |
| SNE6 | 2006 | 341 | 5 | 31 | 31.153 | P | 0.200 | -0.288 |
| R07C | 2006 | 341 | 5 | 31 | 30.687 | P | 0.200 | 0.075  |
| SNE5 | 2006 | 341 | 5 | 31 | 32.167 | P | 0.200 | -0.830 |
| P05C | 2006 | 341 | 5 | 31 | 31.349 | P | 0.200 | -0.049 |
| SND5 | 2006 | 341 | 5 | 31 | 32.404 | P | 0.200 | -0.565 |
| SNC5 | 2006 | 341 | 5 | 31 | 32.792 | P | 0.200 | -0.210 |
| SNB5 | 2006 | 341 | 5 | 31 | 32.879 | P | 0.200 | -0.293 |
| MLAC | 2006 | 341 | 5 | 31 | 32.336 | P | 0.200 | 0.548  |
| SNE4 | 2006 | 341 | 5 | 31 | 33.403 | P | 0.200 | -0.851 |
| ORV  | 2006 | 341 | 5 | 31 | 32.562 | P | 0.200 | -0.927 |
| SNC4 | 2006 | 341 | 5 | 31 | 33.617 | P | 0.200 | -0.821 |
| SN96 | 2006 | 341 | 5 | 31 | 32.741 | P | 0.200 | -0.051 |
| SNA4 | 2006 | 341 | 5 | 31 | 34.173 | P | 0.200 | -0.330 |
| SND4 | 2006 | 341 | 5 | 31 | 33.439 | P | 0.200 | -0.973 |
| LAVA | 2006 | 341 | 5 | 31 | 33.514 | P | 0.200 | -0.687 |
| SLA  | 2006 | 341 | 5 | 31 | 33.571 | P | 0.200 | 0.710  |
| MPM  | 2006 | 341 | 5 | 31 | 33.623 | P | 0.200 | 0.399  |
| GSC  | 2006 | 341 | 5 | 31 | 34.041 | P | 0.200 | 0.542  |
| HEC  | 2006 | 341 | 5 | 31 | 34.177 | P | 0.200 | 0.503  |
| CWC  | 2006 | 341 | 5 | 31 | 34.229 | P | 0.200 | 0.484  |
| O02C | 2006 | 341 | 5 | 31 | 34.257 | P | 0.200 | -1.451 |
| SNB3 | 2006 | 341 | 5 | 31 | 35.309 | P | 0.200 | -0.424 |
| SNA3 | 2006 | 341 | 5 | 31 | 35.355 | P | 0.200 | -0.273 |
| SUTB | 2006 | 341 | 5 | 31 | 34.447 | P | 0.200 | -1.435 |
| SN43 | 2006 | 341 | 5 | 31 | 35.954 | P | 0.200 | 0.649  |
| S06C | 2006 | 341 | 5 | 31 | 35.099 | P | 0.200 | 0.654  |
| CMB  | 2006 | 341 | 5 | 31 | 35.866 | P | 0.200 | -0.031 |
| SN93 | 2006 | 341 | 5 | 31 | 35.995 | P | 0.200 | -0.069 |
| HELL | 2006 | 341 | 5 | 31 | 36.706 | P | 0.200 | 0.383  |
| LRL  | 2006 | 341 | 5 | 31 | 36.780 | P | 0.200 | 0.449  |
| R04C | 2006 | 341 | 5 | 31 | 37.064 | P | 0.200 | 0.254  |
| T06C | 2006 | 341 | 5 | 31 | 37.623 | P | 0.200 | 0.139  |
| RCT  | 2006 | 341 | 5 | 31 | 38.333 | P | 0.200 | -0.428 |

|      |      |     |   |    |        |   |       |        |
|------|------|-----|---|----|--------|---|-------|--------|
| MNRC | 2006 | 341 | 5 | 31 | 38.379 | P | 0.200 | -1.664 |
| S05C | 2006 | 341 | 5 | 31 | 38.863 | P | 0.200 | 0.452  |
| VTV  | 2006 | 341 | 5 | 31 | 39.277 | P | 0.200 | 0.455  |
| ISA  | 2006 | 341 | 5 | 31 | 39.377 | P | 0.200 | 0.777  |
| O01C | 2006 | 341 | 5 | 31 | 40.029 | P | 0.200 | 0.404  |
| SVD  | 2006 | 341 | 5 | 31 | 40.104 | P | 0.200 | 0.399  |
| EDW2 | 2006 | 341 | 5 | 31 | 40.441 | P | 0.200 | 0.417  |
| P01C | 2006 | 341 | 5 | 31 | 40.607 | P | 0.200 | -0.179 |
| BFS  | 2006 | 341 | 5 | 31 | 41.470 | P | 0.200 | -0.134 |
| S04C | 2006 | 341 | 5 | 31 | 41.948 | P | 0.200 | 0.297  |
| CVS  | 2006 | 341 | 5 | 31 | 42.341 | P | 0.200 | 0.096  |
| VCS  | 2006 | 341 | 5 | 31 | 42.439 | P | 0.200 | 0.103  |
| CHF  | 2006 | 341 | 5 | 31 | 42.771 | P | 0.200 | 0.226  |
| MWC  | 2006 | 341 | 5 | 31 | 43.021 | P | 0.200 | -0.167 |
| BRIB | 2006 | 341 | 5 | 31 | 43.429 | P | 0.200 | 0.425  |
| MHC  | 2006 | 341 | 5 | 31 | 44.146 | P | 0.200 | 0.493  |
| PACP | 2006 | 341 | 5 | 31 | 44.583 | P | 0.200 | 0.951  |
| OSI  | 2006 | 341 | 5 | 31 | 44.613 | P | 0.200 | 0.661  |
| PKD  | 2006 | 341 | 5 | 31 | 45.357 | P | 0.200 | -0.116 |
| SAO  | 2006 | 341 | 5 | 31 | 45.943 | P | 0.200 | 0.701  |
| BNLO | 2006 | 341 | 5 | 31 | 46.656 | P | 0.200 | 0.027  |
| PHL  | 2006 | 341 | 5 | 31 | 47.282 | P | 0.200 | -0.446 |
| HAST | 2006 | 341 | 5 | 31 | 47.554 | P | 0.200 | 0.107  |
| MPP  | 2006 | 341 | 5 | 31 | 47.989 | P | 0.200 | 0.783  |

|      |      |     |    |         |          |           |         |        |        |
|------|------|-----|----|---------|----------|-----------|---------|--------|--------|
| 2006 | 309  | 9   | 59 | 28.0822 | 40.20100 | -29.69000 | 10.0000 | 237    | -0.006 |
| Q11A | 2006 | 309 | 10 | 9       | 59.188   | P         | 0.200   | -0.302 |        |
| O09A | 2006 | 309 | 10 | 10      | 1.860    | P         | 0.200   | 0.256  |        |
| P09A | 2006 | 309 | 10 | 10      | 3.593    | P         | 0.200   | -0.020 |        |
| N08A | 2006 | 309 | 10 | 10      | 3.707    | P         | 0.200   | 0.106  |        |
| L07A | 2006 | 309 | 10 | 10      | 5.253    | P         | 0.200   | 0.903  |        |
| M07A | 2006 | 309 | 10 | 10      | 6.197    | P         | 0.200   | 0.517  |        |
| N07B | 2006 | 309 | 10 | 10      | 7.036    | P         | 0.200   | -0.059 |        |
| U11A | 2006 | 309 | 10 | 10      | 7.210    | P         | 0.200   | 0.518  |        |
| R09A | 2006 | 309 | 10 | 10      | 7.635    | P         | 0.200   | -0.160 |        |
| J05A | 2006 | 309 | 10 | 10      | 8.174    | P         | 0.200   | 0.581  |        |
| O07A | 2006 | 309 | 10 | 10      | 8.555    | P         | 0.200   | -0.144 |        |
| K05A | 2006 | 309 | 10 | 10      | 8.598    | P         | 0.200   | 0.366  |        |
| Q08A | 2006 | 309 | 10 | 10      | 8.706    | P         | 0.200   | -0.636 |        |
| V11A | 2006 | 309 | 10 | 10      | 9.427    | P         | 0.200   | 0.380  |        |
| S09A | 2006 | 309 | 10 | 10      | 9.956    | P         | 0.200   | -0.360 |        |
| L05A | 2006 | 309 | 10 | 10      | 10.934   | P         | 0.200   | 0.660  |        |
| N06A | 2006 | 309 | 10 | 10      | 10.943   | P         | 0.200   | 0.270  |        |
| R08A | 2006 | 309 | 10 | 10      | 11.251   | P         | 0.200   | -0.629 |        |
| Q07A | 2006 | 309 | 10 | 10      | 11.708   | P         | 0.200   | -1.081 |        |
| U10A | 2006 | 309 | 10 | 10      | 11.750   | P         | 0.200   | 0.899  |        |
| M06C | 2006 | 309 | 10 | 10      | 12.389   | P         | 0.200   | 0.632  |        |
| O06A | 2006 | 309 | 10 | 10      | 12.714   | P         | 0.200   | 0.058  |        |
| SHO  | 2006 | 309 | 10 | 10      | 12.947   | P         | 0.200   | 0.612  |        |
| GRA  | 2006 | 309 | 10 | 10      | 13.285   | P         | 0.200   | -0.037 |        |
| FUR  | 2006 | 309 | 10 | 10      | 13.367   | P         | 0.200   | 0.437  |        |
| TUQ  | 2006 | 309 | 10 | 10      | 13.436   | P         | 0.200   | 0.883  |        |
| L04A | 2006 | 309 | 10 | 10      | 13.605   | P         | 0.200   | -0.499 |        |
| M05C | 2006 | 309 | 10 | 10      | 14.174   | P         | 0.200   | 0.266  |        |
| SNA8 | 2006 | 309 | 10 | 10      | 15.392   | P         | 0.200   | -0.400 |        |
| SNE9 | 2006 | 309 | 10 | 10      | 14.600   | P         | 0.200   | -0.148 |        |
| SNF9 | 2006 | 309 | 10 | 10      | 14.717   | P         | 0.200   | -0.400 |        |
| M04C | 2006 | 309 | 10 | 10      | 15.083   | P         | 0.200   | -0.276 |        |
| SND8 | 2006 | 309 | 10 | 10      | 16.127   | P         | 0.200   | -0.226 |        |
| S08C | 2006 | 309 | 10 | 10      | 15.173   | P         | 0.200   | -0.265 |        |
| ELFS | 2006 | 309 | 10 | 10      | 15.283   | P         | 0.200   | 0.328  |        |
| WCN  | 2006 | 309 | 10 | 10      | 15.411   | P         | 0.200   | -0.253 |        |
| BEK  | 2006 | 309 | 10 | 10      | 15.767   | P         | 0.200   | -0.321 |        |

|      |      |     |    |    |        |   |       |        |
|------|------|-----|----|----|--------|---|-------|--------|
| SND7 | 2006 | 309 | 10 | 10 | 17.619 | P | 0.200 | -0.259 |
| R07C | 2006 | 309 | 10 | 10 | 16.816 | P | 0.200 | -0.123 |
| SNC7 | 2006 | 309 | 10 | 10 | 18.041 | P | 0.200 | -0.285 |
| HEC  | 2006 | 309 | 10 | 10 | 17.249 | P | 0.200 | 0.653  |
| TIN  | 2006 | 309 | 10 | 10 | 17.250 | P | 0.200 | 0.293  |
| O04C | 2006 | 309 | 10 | 10 | 17.253 | P | 0.200 | -0.229 |
| M03C | 2006 | 309 | 10 | 10 | 17.520 | P | 0.200 | -0.611 |
| SLA  | 2006 | 309 | 10 | 10 | 17.684 | P | 0.200 | 0.773  |
| GSC  | 2006 | 309 | 10 | 10 | 17.689 | P | 0.200 | 0.761  |
| O05C | 2006 | 309 | 10 | 10 | 17.781 | P | 0.200 | -0.152 |
| MLAC | 2006 | 309 | 10 | 10 | 17.945 | P | 0.200 | 0.248  |
| MPM  | 2006 | 309 | 10 | 10 | 17.984 | P | 0.200 | 0.500  |
| SNF6 | 2006 | 309 | 10 | 10 | 19.087 | P | 0.200 | -0.610 |
| SNE6 | 2006 | 309 | 10 | 10 | 19.151 | P | 0.200 | -0.209 |
| R06C | 2006 | 309 | 10 | 10 | 18.235 | P | 0.200 | 1.096  |
| CWC  | 2006 | 309 | 10 | 10 | 18.782 | P | 0.200 | 0.298  |
| P05C | 2006 | 309 | 10 | 10 | 18.991 | P | 0.200 | -0.138 |
| R05C | 2006 | 309 | 10 | 10 | 19.160 | P | 0.200 | -0.010 |
| SND5 | 2006 | 309 | 10 | 10 | 20.210 | P | 0.200 | -0.504 |
| SNC5 | 2006 | 309 | 10 | 10 | 20.218 | P | 0.200 | -0.353 |
| SNG5 | 2006 | 309 | 10 | 10 | 20.335 | P | 0.200 | -0.951 |
| SN96 | 2006 | 309 | 10 | 10 | 19.778 | P | 0.200 | 0.072  |
| SNC4 | 2006 | 309 | 10 | 10 | 21.066 | P | 0.200 | -0.851 |
| WDC  | 2006 | 309 | 10 | 10 | 20.121 | P | 0.200 | -2.080 |
| SNE4 | 2006 | 309 | 10 | 10 | 21.316 | P | 0.200 | -0.812 |
| SNA4 | 2006 | 309 | 10 | 10 | 21.332 | P | 0.200 | -0.252 |
| LRL  | 2006 | 309 | 10 | 10 | 20.573 | P | 0.200 | 0.340  |
| SN43 | 2006 | 309 | 10 | 10 | 21.658 | P | 0.200 | 0.394  |
| ORV  | 2006 | 309 | 10 | 10 | 20.761 | P | 0.200 | -0.918 |
| LAVA | 2006 | 309 | 10 | 10 | 20.828 | P | 0.200 | -0.727 |
| SND4 | 2006 | 309 | 10 | 10 | 21.348 | P | 0.200 | -0.745 |
| SUTB | 2006 | 309 | 10 | 10 | 21.434 | P | 0.200 | -2.459 |
| S06C | 2006 | 309 | 10 | 10 | 21.474 | P | 0.200 | 0.621  |
| SNA3 | 2006 | 309 | 10 | 10 | 22.528 | P | 0.200 | -0.140 |
| SNB3 | 2006 | 309 | 10 | 10 | 22.553 | P | 0.200 | -0.453 |
| HELL | 2006 | 309 | 10 | 10 | 21.707 | P | 0.200 | 0.133  |
| BBR  | 2006 | 309 | 10 | 10 | 22.136 | P | 0.200 | 0.812  |
| CMB  | 2006 | 309 | 10 | 10 | 22.376 | P | 0.200 | -0.196 |
| VTV  | 2006 | 309 | 10 | 10 | 22.409 | P | 0.200 | 0.498  |
| SN93 | 2006 | 309 | 10 | 10 | 22.862 | P | 0.200 | -0.065 |
| T06C | 2006 | 309 | 10 | 10 | 22.945 | P | 0.200 | -0.241 |
| SVD  | 2006 | 309 | 10 | 10 | 22.967 | P | 0.200 | 0.602  |
| SNC3 | 2006 | 309 | 10 | 10 | 23.096 | P | 0.200 | -0.352 |
| ISA  | 2006 | 309 | 10 | 10 | 23.681 | P | 0.200 | 0.771  |
| EDW2 | 2006 | 309 | 10 | 10 | 23.898 | P | 0.200 | 0.309  |
| BFS  | 2006 | 309 | 10 | 10 | 24.085 | P | 0.200 | -0.487 |
| R04C | 2006 | 309 | 10 | 10 | 24.262 | P | 0.200 | 0.406  |
| RCT  | 2006 | 309 | 10 | 10 | 24.427 | P | 0.200 | 0.648  |
| VES  | 2006 | 309 | 10 | 10 | 24.504 | P | 0.200 | -0.310 |
| S05C | 2006 | 309 | 10 | 10 | 24.838 | P | 0.200 | 0.269  |
| VCS  | 2006 | 309 | 10 | 10 | 25.849 | P | 0.200 | 0.209  |
| CHF  | 2006 | 309 | 10 | 10 | 26.087 | P | 0.200 | 0.377  |
| V05C | 2006 | 309 | 10 | 10 | 27.572 | P | 0.200 | -0.585 |
| S04C | 2006 | 309 | 10 | 10 | 28.357 | P | 0.200 | 0.118  |
| P01C | 2006 | 309 | 10 | 10 | 29.225 | P | 0.200 | -0.189 |
| BDM  | 2006 | 309 | 10 | 10 | 29.558 | P | 0.200 | 0.623  |
| CVS  | 2006 | 309 | 10 | 10 | 29.918 | P | 0.200 | 0.131  |
| BRIB | 2006 | 309 | 10 | 10 | 30.599 | P | 0.200 | 0.474  |
| HOPS | 2006 | 309 | 10 | 10 | 30.619 | P | 0.200 | 0.554  |
| MHC  | 2006 | 309 | 10 | 10 | 30.734 | P | 0.200 | 0.527  |
| BRK  | 2006 | 309 | 10 | 10 | 30.856 | P | 0.200 | 0.126  |
| JRSC | 2006 | 309 | 10 | 10 | 30.898 | P | 0.200 | -1.451 |
| CIA  | 2006 | 309 | 10 | 10 | 30.984 | P | 0.200 | 0.428  |

|      |      |     |    |    |        |          |           |         |     |       |
|------|------|-----|----|----|--------|----------|-----------|---------|-----|-------|
| SAO  | 2006 | 309 | 10 | 10 | 31.797 | P        | 0.200     | 0.481   |     |       |
| MFP  | 2006 | 309 | 10 | 10 | 32.138 | P        | 0.200     | 0.745   |     |       |
| 2007 | 230  | 2   | 37 |    | 5.9877 | 40.02700 | -29.75400 | 10.0000 | 350 | 0.005 |
| Q11A | 2007 | 230 | 2  | 47 | 37.487 | P        | 0.200     | -0.198  |     |       |
| R11A | 2007 | 230 | 2  | 47 | 38.800 | P        | 0.200     | -0.317  |     |       |
| P10A | 2007 | 230 | 2  | 47 | 38.955 | P        | 0.200     | 0.369   |     |       |
| BMN  | 2007 | 230 | 2  | 47 | 39.128 | P        | 0.200     | 0.037   |     |       |
| O09A | 2007 | 230 | 2  | 47 | 40.147 | P        | 0.200     | 0.310   |     |       |
| Q10A | 2007 | 230 | 2  | 47 | 41.126 | P        | 0.200     | 0.060   |     |       |
| P09A | 2007 | 230 | 2  | 47 | 41.866 | P        | 0.200     | 0.033   |     |       |
| N08A | 2007 | 230 | 2  | 47 | 41.913 | P        | 0.200     | 0.060   |     |       |
| T11A | 2007 | 230 | 2  | 47 | 41.928 | P        | 0.200     | 0.560   |     |       |
| S11A | 2007 | 230 | 2  | 47 | 42.609 | P        | 0.200     | 0.279   |     |       |
| R10A | 2007 | 230 | 2  | 47 | 42.758 | P        | 0.200     | 0.262   |     |       |
| L07A | 2007 | 230 | 2  | 47 | 43.541 | P        | 0.200     | 0.907   |     |       |
| O08A | 2007 | 230 | 2  | 47 | 43.652 | P        | 0.200     | -0.020  |     |       |
| Q09A | 2007 | 230 | 2  | 47 | 44.438 | P        | 0.200     | -0.055  |     |       |
| M07A | 2007 | 230 | 2  | 47 | 44.522 | P        | 0.200     | 0.570   |     |       |
| S10A | 2007 | 230 | 2  | 47 | 44.910 | P        | 0.200     | -0.099  |     |       |
| U11A | 2007 | 230 | 2  | 47 | 45.356 | P        | 0.200     | 0.520   |     |       |
| N07B | 2007 | 230 | 2  | 47 | 45.397 | P        | 0.200     | 0.046   |     |       |
| R09A | 2007 | 230 | 2  | 47 | 45.881 | P        | 0.200     | -0.108  |     |       |
| P08A | 2007 | 230 | 2  | 47 | 46.151 | P        | 0.200     | 0.997   |     |       |
| J05A | 2007 | 230 | 2  | 47 | 46.650 | P        | 0.200     | 0.736   |     |       |
| O07A | 2007 | 230 | 2  | 47 | 46.853 | P        | 0.200     | -0.090  |     |       |
| K05A | 2007 | 230 | 2  | 47 | 46.960 | P        | 0.200     | 0.420   |     |       |
| Q08A | 2007 | 230 | 2  | 47 | 46.971 | P        | 0.200     | -0.581  |     |       |
| TPNV | 2007 | 230 | 2  | 47 | 47.047 | P        | 0.200     | 0.090   |     |       |
| TPH  | 2007 | 230 | 2  | 47 | 47.059 | P        | 0.200     | -0.265  |     |       |
| V11A | 2007 | 230 | 2  | 47 | 47.562 | P        | 0.200     | 0.382   |     |       |
| S09A | 2007 | 230 | 2  | 47 | 48.143 | P        | 0.200     | -0.357  |     |       |
| J04A | 2007 | 230 | 2  | 47 | 49.248 | P        | 0.200     | -0.388  |     |       |
| N06A | 2007 | 230 | 2  | 47 | 49.258 | P        | 0.200     | 0.322   |     |       |
| L05A | 2007 | 230 | 2  | 47 | 49.382 | P        | 0.200     | 0.814   |     |       |
| R08A | 2007 | 230 | 2  | 47 | 49.507 | P        | 0.200     | -0.575  |     |       |
| K04A | 2007 | 230 | 2  | 47 | 50.031 | P        | 0.200     | -0.176  |     |       |
| M06C | 2007 | 230 | 2  | 47 | 50.668 | P        | 0.200     | 0.636   |     |       |
| O06A | 2007 | 230 | 2  | 47 | 51.068 | P        | 0.200     | 0.162   |     |       |
| SHO  | 2007 | 230 | 2  | 47 | 51.090 | P        | 0.200     | 0.615   |     |       |
| GRA  | 2007 | 230 | 2  | 47 | 51.508 | P        | 0.200     | 0.014   |     |       |
| TUQ  | 2007 | 230 | 2  | 47 | 51.517 | P        | 0.200     | 0.836   |     |       |
| FUR  | 2007 | 230 | 2  | 47 | 51.576 | P        | 0.200     | 0.490   |     |       |
| L04A | 2007 | 230 | 2  | 47 | 52.011 | P        | 0.200     | -0.397  |     |       |
| M05C | 2007 | 230 | 2  | 47 | 52.510 | P        | 0.200     | 0.321   |     |       |
| SNB9 | 2007 | 230 | 2  | 47 | 52.753 | P        | 0.200     | -0.202  |     |       |
| SNE9 | 2007 | 230 | 2  | 47 | 53.003 | P        | 0.200     | 0.005   |     |       |
| SND9 | 2007 | 230 | 2  | 47 | 53.113 | P        | 0.200     | 0.143   |     |       |
| SNF9 | 2007 | 230 | 2  | 47 | 53.175 | P        | 0.200     | -0.195  |     |       |
| S08C | 2007 | 230 | 2  | 47 | 53.363 | P        | 0.200     | -0.261  |     |       |
| M04C | 2007 | 230 | 2  | 47 | 53.482 | P        | 0.200     | -0.171  |     |       |
| WCN  | 2007 | 230 | 2  | 47 | 53.747 | P        | 0.200     | -0.150  |     |       |
| BEK  | 2007 | 230 | 2  | 47 | 54.068 | P        | 0.200     | -0.268  |     |       |
| SND8 | 2007 | 230 | 2  | 47 | 54.423 | P        | 0.200     | -0.172  |     |       |
| SNF8 | 2007 | 230 | 2  | 47 | 54.927 | P        | 0.200     | -0.066  |     |       |
| HEC  | 2007 | 230 | 2  | 47 | 55.271 | P        | 0.200     | 0.555   |     |       |
| HATC | 2007 | 230 | 2  | 47 | 55.402 | P        | 0.200     | 0.059   |     |       |
| TIN  | 2007 | 230 | 2  | 47 | 55.481 | P        | 0.200     | 0.347   |     |       |
| YBH  | 2007 | 230 | 2  | 47 | 55.500 | P        | 0.200     | -1.684  |     |       |
| O04C | 2007 | 230 | 2  | 47 | 55.518 | P        | 0.200     | -0.226  |     |       |
| GSC  | 2007 | 230 | 2  | 47 | 55.775 | P        | 0.200     | 0.715   |     |       |
| SNE7 | 2007 | 230 | 2  | 47 | 55.804 | P        | 0.200     | -0.205  |     |       |
| SLA  | 2007 | 230 | 2  | 47 | 55.884 | P        | 0.200     | 0.825   |     |       |



|      |      |     |   |    |        |   |       |        |
|------|------|-----|---|----|--------|---|-------|--------|
| M03C | 2007 | 230 | 2 | 47 | 55.960 | P | 0.200 | -0.458 |
| SND7 | 2007 | 230 | 2 | 47 | 55.968 | P | 0.200 | -0.154 |
| O05C | 2007 | 230 | 2 | 47 | 56.138 | P | 0.200 | -0.048 |
| MPM  | 2007 | 230 | 2 | 47 | 56.190 | P | 0.200 | 0.552  |
| SNC7 | 2007 | 230 | 2 | 47 | 56.331 | P | 0.200 | -0.232 |
| SNG7 | 2007 | 230 | 2 | 47 | 56.613 | P | 0.200 | -0.217 |
| SN86 | 2007 | 230 | 2 | 47 | 56.753 | P | 0.200 | -0.282 |
| CWC  | 2007 | 230 | 2 | 47 | 57.150 | P | 0.200 | 0.501  |
| P05C | 2007 | 230 | 2 | 47 | 57.333 | P | 0.200 | -0.034 |
| SNB6 | 2007 | 230 | 2 | 47 | 57.390 | P | 0.200 | -0.156 |
| SNC6 | 2007 | 230 | 2 | 47 | 57.399 | P | 0.200 | -0.158 |
| SN55 | 2007 | 230 | 2 | 47 | 57.417 | P | 0.200 | 0.301  |
| SNF6 | 2007 | 230 | 2 | 47 | 57.439 | P | 0.200 | -0.507 |
| SNE6 | 2007 | 230 | 2 | 47 | 57.498 | P | 0.200 | -0.105 |
| M02C | 2007 | 230 | 2 | 47 | 57.574 | P | 0.200 | -1.415 |
| YO11 | 2007 | 230 | 2 | 47 | 57.662 | P | 0.200 | 0.225  |
| YO10 | 2007 | 230 | 2 | 47 | 58.009 | P | 0.200 | 0.208  |
| L02A | 2007 | 230 | 2 | 47 | 58.276 | P | 0.200 | -0.797 |
| WDC  | 2007 | 230 | 2 | 47 | 58.349 | P | 0.200 | -2.126 |
| SNB5 | 2007 | 230 | 2 | 47 | 58.376 | P | 0.200 | -0.354 |
| SNC5 | 2007 | 230 | 2 | 47 | 58.405 | P | 0.200 | -0.400 |
| SNA5 | 2007 | 230 | 2 | 47 | 58.493 | P | 0.200 | -0.061 |
| SND5 | 2007 | 230 | 2 | 47 | 58.502 | P | 0.200 | -0.450 |
| YO09 | 2007 | 230 | 2 | 47 | 58.553 | P | 0.200 | 0.454  |
| SNG5 | 2007 | 230 | 2 | 47 | 58.591 | P | 0.200 | -0.947 |
| LRL  | 2007 | 230 | 2 | 47 | 58.718 | P | 0.200 | 0.342  |
| YO08 | 2007 | 230 | 2 | 47 | 58.770 | P | 0.200 | 0.521  |
| YO06 | 2007 | 230 | 2 | 47 | 58.958 | P | 0.200 | 0.419  |
| YO07 | 2007 | 230 | 2 | 47 | 58.993 | P | 0.200 | 0.529  |
| ORV  | 2007 | 230 | 2 | 47 | 59.114 | P | 0.200 | -0.815 |
| SN64 | 2007 | 230 | 2 | 47 | 59.143 | P | 0.200 | 0.576  |
| LAVA | 2007 | 230 | 2 | 47 | 59.160 | P | 0.200 | -0.623 |
| SNC4 | 2007 | 230 | 2 | 47 | 59.351 | P | 0.200 | -0.797 |
| YO05 | 2007 | 230 | 2 | 47 | 59.365 | P | 0.200 | 0.578  |
| YO04 | 2007 | 230 | 2 | 47 | 59.519 | P | 0.200 | 0.653  |
| SNE4 | 2007 | 230 | 2 | 47 | 59.561 | P | 0.200 | -0.808 |
| SNA4 | 2007 | 230 | 2 | 47 | 59.608 | P | 0.200 | -0.196 |
| SND4 | 2007 | 230 | 2 | 47 | 59.638 | P | 0.200 | -0.691 |
| YO03 | 2007 | 230 | 2 | 47 | 59.672 | P | 0.200 | 0.585  |
| S06C | 2007 | 230 | 2 | 47 | 59.783 | P | 0.200 | 0.725  |
| YO02 | 2007 | 230 | 2 | 47 | 59.835 | P | 0.200 | 0.568  |
| HELL | 2007 | 230 | 2 | 47 | 59.886 | P | 0.200 | 0.136  |
| YO01 | 2007 | 230 | 2 | 47 | 59.969 | P | 0.200 | 0.483  |
| SN63 | 2007 | 230 | 2 | 48 | 0.118  | P | 0.200 | 0.462  |
| CMB  | 2007 | 230 | 2 | 48 | 0.741  | P | 0.200 | -0.043 |
| SNA3 | 2007 | 230 | 2 | 48 | 0.752  | P | 0.200 | -0.134 |
| SUTB | 2007 | 230 | 2 | 48 | 0.831  | P | 0.200 | -1.306 |
| SNB3 | 2007 | 230 | 2 | 48 | 0.833  | P | 0.200 | -0.399 |
| SVD  | 2007 | 230 | 2 | 48 | 1.081  | P | 0.200 | 0.605  |
| SN93 | 2007 | 230 | 2 | 48 | 1.131  | P | 0.200 | -0.011 |
| T06C | 2007 | 230 | 2 | 48 | 1.186  | P | 0.200 | -0.188 |
| RCT  | 2007 | 230 | 2 | 48 | 1.351  | P | 0.200 | -0.598 |
| SNC3 | 2007 | 230 | 2 | 48 | 1.480  | P | 0.200 | -0.197 |
| N02C | 2007 | 230 | 2 | 48 | 1.693  | P | 0.200 | -1.092 |
| ISA  | 2007 | 230 | 2 | 48 | 1.787  | P | 0.200 | 0.726  |
| Q04C | 2007 | 230 | 2 | 48 | 1.940  | P | 0.200 | -0.019 |
| EDW2 | 2007 | 230 | 2 | 48 | 2.135  | P | 0.200 | 0.412  |
| R04C | 2007 | 230 | 2 | 48 | 2.586  | P | 0.200 | 0.511  |
| BFS  | 2007 | 230 | 2 | 48 | 2.706  | P | 0.200 | 0.016  |
| S05C | 2007 | 230 | 2 | 48 | 3.140  | P | 0.200 | 0.373  |
| GASB | 2007 | 230 | 2 | 48 | 3.636  | P | 0.200 | -1.070 |
| VCS  | 2007 | 230 | 2 | 48 | 3.979  | P | 0.200 | 0.212  |
| MWC  | 2007 | 230 | 2 | 48 | 4.494  | P | 0.200 | 0.095  |

|     |      |     |   |    |       |   |       |        |
|-----|------|-----|---|----|-------|---|-------|--------|
| ARV | 2007 | 230 | 2 | 48 | 5.011 | P | 0.200 | 0.684  |
| DEC | 2007 | 230 | 2 | 48 | 5.127 | P | 0.200 | -0.306 |
| DJJ | 2007 | 230 | 2 | 48 | 5.922 | P | 0.200 | -0.526 |

|      |     |   |    |        |          |           |         |     |       |
|------|-----|---|----|--------|----------|-----------|---------|-----|-------|
| 2007 | 180 | 5 | 56 | 2.6330 | 44.44200 | -28.21000 | 10.0000 | 332 | 0.007 |
|------|-----|---|----|--------|----------|-----------|---------|-----|-------|

|      |      |     |   |   |        |   |       |        |
|------|------|-----|---|---|--------|---|-------|--------|
| Q11A | 2007 | 180 | 6 | 6 | 26.395 | P | 0.200 | -0.279 |
| P10A | 2007 | 180 | 6 | 6 | 27.551 | P | 0.200 | 0.538  |
| R11A | 2007 | 180 | 6 | 6 | 28.032 | P | 0.200 | -0.326 |
| O09A | 2007 | 180 | 6 | 6 | 28.470 | P | 0.200 | 0.652  |
| N08A | 2007 | 180 | 6 | 6 | 29.597 | P | 0.200 | 0.251  |
| Q10A | 2007 | 180 | 6 | 6 | 30.049 | P | 0.200 | 0.160  |
| L07A | 2007 | 180 | 6 | 6 | 30.126 | P | 0.200 | 0.846  |
| P09A | 2007 | 180 | 6 | 6 | 30.371 | P | 0.200 | 0.228  |
| T11A | 2007 | 180 | 6 | 6 | 31.508 | P | 0.200 | 0.255  |
| M07A | 2007 | 180 | 6 | 6 | 31.662 | P | 0.200 | 0.721  |
| S11A | 2007 | 180 | 6 | 6 | 32.122 | P | 0.200 | 0.236  |
| J05A | 2007 | 180 | 6 | 6 | 32.227 | P | 0.200 | 0.616  |
| I04A | 2007 | 180 | 6 | 6 | 32.500 | P | 0.200 | -1.457 |
| K05A | 2007 | 180 | 6 | 6 | 32.879 | P | 0.200 | 0.300  |
| N07B | 2007 | 180 | 6 | 6 | 32.986 | P | 0.200 | 0.289  |
| S10A | 2007 | 180 | 6 | 6 | 34.109 | P | 0.200 | -0.143 |
| R09A | 2007 | 180 | 6 | 6 | 34.824 | P | 0.200 | -0.154 |
| O07A | 2007 | 180 | 6 | 6 | 34.826 | P | 0.200 | 0.193  |
| J04A | 2007 | 180 | 6 | 6 | 34.866 | P | 0.200 | -0.358 |
| Q08A | 2007 | 180 | 6 | 6 | 35.582 | P | 0.200 | -0.486 |
| L05A | 2007 | 180 | 6 | 6 | 35.609 | P | 0.200 | 0.644  |
| K04A | 2007 | 180 | 6 | 6 | 35.776 | P | 0.200 | -0.404 |
| TPH  | 2007 | 180 | 6 | 6 | 36.106 | P | 0.200 | -0.265 |
| TPNV | 2007 | 180 | 6 | 6 | 36.662 | P | 0.200 | -0.104 |
| N06A | 2007 | 180 | 6 | 6 | 36.664 | P | 0.200 | 0.507  |
| S09A | 2007 | 180 | 6 | 6 | 37.367 | P | 0.200 | -0.358 |
| M06C | 2007 | 180 | 6 | 6 | 37.482 | P | 0.200 | 0.570  |
| V11A | 2007 | 180 | 6 | 6 | 37.660 | P | 0.200 | -0.059 |
| L04A | 2007 | 180 | 6 | 6 | 38.154 | P | 0.200 | -0.406 |
| R08A | 2007 | 180 | 6 | 6 | 38.243 | P | 0.200 | -0.596 |
| O06A | 2007 | 180 | 6 | 6 | 38.870 | P | 0.200 | 0.453  |
| M05C | 2007 | 180 | 6 | 6 | 39.135 | P | 0.200 | 0.242  |
| M04C | 2007 | 180 | 6 | 6 | 39.680 | P | 0.200 | -0.339 |
| SNE9 | 2007 | 180 | 6 | 6 | 40.663 | P | 0.200 | 0.143  |
| SNF9 | 2007 | 180 | 6 | 6 | 40.770 | P | 0.200 | -0.009 |
| GRA  | 2007 | 180 | 6 | 6 | 40.919 | P | 0.200 | -0.132 |
| SND9 | 2007 | 180 | 6 | 6 | 40.954 | P | 0.200 | 0.326  |
| SNB9 | 2007 | 180 | 6 | 6 | 41.003 | P | 0.200 | 0.080  |
| SHO  | 2007 | 180 | 6 | 6 | 41.025 | P | 0.200 | 0.216  |
| FUR  | 2007 | 180 | 6 | 6 | 41.154 | P | 0.200 | 0.145  |
| SN98 | 2007 | 180 | 6 | 6 | 41.524 | P | 0.200 | -0.416 |
| TUQ  | 2007 | 180 | 6 | 6 | 41.758 | P | 0.200 | 0.445  |
| BEK  | 2007 | 180 | 6 | 6 | 41.777 | P | 0.200 | -0.122 |
| WCN  | 2007 | 180 | 6 | 6 | 41.946 | P | 0.200 | 0.087  |
| SND8 | 2007 | 180 | 6 | 6 | 42.264 | P | 0.200 | -0.027 |
| SNF8 | 2007 | 180 | 6 | 6 | 42.464 | P | 0.200 | 0.023  |
| S08C | 2007 | 180 | 6 | 6 | 42.511 | P | 0.200 | -0.253 |
| M03C | 2007 | 180 | 6 | 6 | 42.517 | P | 0.200 | -0.472 |
| O04C | 2007 | 180 | 6 | 6 | 42.724 | P | 0.200 | -0.227 |
| YBH  | 2007 | 180 | 6 | 6 | 42.984 | P | 0.200 | -0.438 |
| SNE7 | 2007 | 180 | 6 | 6 | 43.381 | P | 0.200 | -0.169 |
| O05C | 2007 | 180 | 6 | 6 | 43.451 | P | 0.200 | -0.158 |
| SND7 | 2007 | 180 | 6 | 6 | 43.708 | P | 0.200 | -0.055 |
| R07C | 2007 | 180 | 6 | 6 | 43.758 | P | 0.200 | -0.066 |
| SN97 | 2007 | 180 | 6 | 6 | 43.770 | P | 0.200 | -0.178 |
| SNG7 | 2007 | 180 | 6 | 6 | 43.858 | P | 0.200 | -0.263 |
| SNC7 | 2007 | 180 | 6 | 6 | 44.359 | P | 0.200 | -0.033 |
| TIN  | 2007 | 180 | 6 | 6 | 44.587 | P | 0.200 | 0.099  |

|      |      |     |   |   |        |   |       |        |
|------|------|-----|---|---|--------|---|-------|--------|
| SNF6 | 2007 | 180 | 6 | 6 | 44.960 | P | 0.200 | -0.512 |
| MLAC | 2007 | 180 | 6 | 6 | 45.045 | P | 0.200 | 0.212  |
| SNE6 | 2007 | 180 | 6 | 6 | 45.063 | P | 0.200 | -0.216 |
| P05C | 2007 | 180 | 6 | 6 | 45.227 | P | 0.200 | 0.074  |
| SN86 | 2007 | 180 | 6 | 6 | 45.244 | P | 0.200 | -0.136 |
| SNC6 | 2007 | 180 | 6 | 6 | 45.424 | P | 0.200 | -0.049 |
| M02C | 2007 | 180 | 6 | 6 | 45.503 | P | 0.200 | 0.126  |
| SLA  | 2007 | 180 | 6 | 6 | 45.658 | P | 0.200 | 0.479  |
| HEC  | 2007 | 180 | 6 | 6 | 45.769 | P | 0.200 | 0.218  |
| MPM  | 2007 | 180 | 6 | 6 | 45.838 | P | 0.200 | 0.214  |
| GSC  | 2007 | 180 | 6 | 6 | 45.939 | P | 0.200 | 0.366  |
| SNG5 | 2007 | 180 | 6 | 6 | 46.017 | P | 0.200 | -0.968 |
| SN55 | 2007 | 180 | 6 | 6 | 46.101 | P | 0.200 | 0.248  |
| SNC5 | 2007 | 180 | 6 | 6 | 46.508 | P | 0.200 | -0.195 |
| SNB5 | 2007 | 180 | 6 | 6 | 46.513 | P | 0.200 | -0.271 |
| ORV  | 2007 | 180 | 6 | 6 | 46.525 | P | 0.200 | -0.919 |
| SNA5 | 2007 | 180 | 6 | 6 | 46.564 | P | 0.200 | -0.162 |
| CWC  | 2007 | 180 | 6 | 6 | 46.639 | P | 0.200 | 0.305  |
| LAVA | 2007 | 180 | 6 | 6 | 47.199 | P | 0.200 | -0.624 |
| SNE4 | 2007 | 180 | 6 | 6 | 47.205 | P | 0.200 | -0.882 |
| SNC4 | 2007 | 180 | 6 | 6 | 47.306 | P | 0.200 | -0.807 |
| SND4 | 2007 | 180 | 6 | 6 | 47.411 | P | 0.200 | -0.759 |
| SNA4 | 2007 | 180 | 6 | 6 | 47.759 | P | 0.200 | -0.265 |
| SN64 | 2007 | 180 | 6 | 6 | 47.873 | P | 0.200 | 0.632  |
| SUTB | 2007 | 180 | 6 | 6 | 48.351 | P | 0.200 | -1.426 |
| S06C | 2007 | 180 | 6 | 6 | 48.416 | P | 0.200 | 0.717  |
| N02C | 2007 | 180 | 6 | 6 | 48.478 | P | 0.200 | -0.922 |
| LRL  | 2007 | 180 | 6 | 6 | 48.708 | P | 0.200 | 0.106  |
| SNB3 | 2007 | 180 | 6 | 6 | 48.820 | P | 0.200 | -0.514 |
| SNA3 | 2007 | 180 | 6 | 6 | 48.929 | P | 0.200 | -0.208 |
| SN63 | 2007 | 180 | 6 | 6 | 48.986 | P | 0.200 | 0.603  |
| CMB  | 2007 | 180 | 6 | 6 | 49.198 | P | 0.200 | -0.065 |
| HELL | 2007 | 180 | 6 | 6 | 49.266 | P | 0.200 | 0.143  |
| SN93 | 2007 | 180 | 6 | 6 | 49.389 | P | 0.200 | -0.118 |
| SNC3 | 2007 | 180 | 6 | 6 | 49.461 | P | 0.200 | -0.225 |
| T06C | 2007 | 180 | 6 | 6 | 50.421 | P | 0.200 | -0.050 |
| R04C | 2007 | 180 | 6 | 6 | 50.681 | P | 0.200 | 0.355  |
| RCT  | 2007 | 180 | 6 | 6 | 50.717 | P | 0.200 | -0.762 |
| BBR  | 2007 | 180 | 6 | 6 | 50.794 | P | 0.200 | 0.380  |
| VTV  | 2007 | 180 | 6 | 6 | 50.893 | P | 0.200 | 0.110  |
| ISA  | 2007 | 180 | 6 | 6 | 51.621 | P | 0.200 | 0.581  |
| S05C | 2007 | 180 | 6 | 6 | 52.040 | P | 0.200 | 0.463  |
| VES  | 2007 | 180 | 6 | 6 | 52.289 | P | 0.200 | -0.462 |
| BFS  | 2007 | 180 | 6 | 6 | 53.095 | P | 0.200 | -0.425 |
| SVD  | 2007 | 180 | 6 | 6 | 53.208 | P | 0.200 | 1.700  |
| VCS  | 2007 | 180 | 6 | 6 | 54.201 | P | 0.200 | -0.194 |
| P01C | 2007 | 180 | 6 | 6 | 54.719 | P | 0.200 | -0.210 |
| CHF  | 2007 | 180 | 6 | 6 | 54.727 | P | 0.200 | 0.176  |
| S04C | 2007 | 180 | 6 | 6 | 55.102 | P | 0.200 | 0.109  |
| DJJ  | 2007 | 180 | 6 | 6 | 56.198 | P | 0.200 | -0.980 |
| CVS  | 2007 | 180 | 6 | 6 | 56.227 | P | 0.200 | 0.264  |
| MHC  | 2007 | 180 | 6 | 6 | 57.546 | P | 0.200 | 0.559  |
| BRK  | 2007 | 180 | 6 | 6 | 57.565 | P | 0.200 | 0.421  |
| PACP | 2007 | 180 | 6 | 6 | 57.693 | P | 0.200 | 0.863  |
| PKD  | 2007 | 180 | 6 | 6 | 57.920 | P | 0.200 | -0.354 |
| MCCM | 2007 | 180 | 6 | 6 | 58.615 | P | 0.200 | 0.265  |
| JRSC | 2007 | 180 | 6 | 6 | 59.073 | P | 0.200 | 0.095  |
| U04C | 2007 | 180 | 6 | 6 | 59.448 | P | 0.200 | 1.987  |
| BNLO | 2007 | 180 | 6 | 7 | 0.366  | P | 0.200 | 0.400  |

|      |      |     |    |         |          |           |         |       |       |
|------|------|-----|----|---------|----------|-----------|---------|-------|-------|
| 2007 | 143  | 4   | 41 | 47.1121 | 52.35200 | -31.81400 | 10.0000 | 327   | 0.005 |
| BMN  | 2007 | 143 | 4  | 51      | 31.533   | P         | 0.200   | 0.335 |       |
| L07A | 2007 | 143 | 4  | 51      | 32.491   | P         | 0.200   | 0.659 |       |

|      |      |     |   |    |        |   |       |        |
|------|------|-----|---|----|--------|---|-------|--------|
| Q11A | 2007 | 143 | 4 | 51 | 32.626 | P | 0.200 | -0.012 |
| P10A | 2007 | 143 | 4 | 51 | 32.732 | P | 0.200 | 0.596  |
| O09A | 2007 | 143 | 4 | 51 | 33.035 | P | 0.200 | 0.724  |
| I04A | 2007 | 143 | 4 | 51 | 33.412 | P | 0.200 | -1.276 |
| J05A | 2007 | 143 | 4 | 51 | 33.482 | P | 0.200 | 0.592  |
| N08A | 2007 | 143 | 4 | 51 | 33.571 | P | 0.200 | 0.418  |
| R11A | 2007 | 143 | 4 | 51 | 34.579 | P | 0.200 | -0.204 |
| K05A | 2007 | 143 | 4 | 51 | 34.651 | P | 0.200 | 0.277  |
| M07A | 2007 | 143 | 4 | 51 | 34.805 | P | 0.200 | 0.726  |
| P09A | 2007 | 143 | 4 | 51 | 35.700 | P | 0.200 | 0.496  |
| J04A | 2007 | 143 | 4 | 51 | 36.027 | P | 0.200 | -0.416 |
| I03A | 2007 | 143 | 4 | 51 | 36.051 | P | 0.200 | -0.870 |
| O08A | 2007 | 143 | 4 | 51 | 36.096 | P | 0.200 | 0.441  |
| Q10A | 2007 | 143 | 4 | 51 | 36.162 | P | 0.200 | 0.429  |
| N07B | 2007 | 143 | 4 | 51 | 36.843 | P | 0.200 | 0.450  |
| J03A | 2007 | 143 | 4 | 51 | 37.270 | P | 0.200 | -1.510 |
| K04A | 2007 | 143 | 4 | 51 | 37.560 | P | 0.200 | -0.408 |
| L05A | 2007 | 143 | 4 | 51 | 37.775 | P | 0.200 | 0.429  |
| R10A | 2007 | 143 | 4 | 51 | 38.493 | P | 0.200 | 0.528  |
| P08A | 2007 | 143 | 4 | 51 | 38.507 | P | 0.200 | 0.478  |
| Q09A | 2007 | 143 | 4 | 51 | 39.071 | P | 0.200 | 0.216  |
| T11A | 2007 | 143 | 4 | 51 | 39.087 | P | 0.200 | 0.330  |
| O07A | 2007 | 143 | 4 | 51 | 39.291 | P | 0.200 | 0.400  |
| S11A | 2007 | 143 | 4 | 51 | 39.327 | P | 0.200 | 0.431  |
| J02A | 2007 | 143 | 4 | 51 | 39.951 | P | 0.200 | -1.082 |
| L04A | 2007 | 143 | 4 | 51 | 40.045 | P | 0.200 | -0.648 |
| DBO  | 2007 | 143 | 4 | 51 | 40.233 | P | 0.200 | -0.861 |
| N06A | 2007 | 143 | 4 | 51 | 40.281 | P | 0.200 | 0.508  |
| M06C | 2007 | 143 | 4 | 51 | 40.469 | P | 0.200 | 0.419  |
| HUMO | 2007 | 143 | 4 | 51 | 40.515 | P | 0.200 | -1.889 |
| S10A | 2007 | 143 | 4 | 51 | 41.097 | P | 0.200 | 0.227  |
| R09A | 2007 | 143 | 4 | 51 | 41.291 | P | 0.200 | 0.078  |
| Q08A | 2007 | 143 | 4 | 51 | 41.445 | P | 0.200 | -0.164 |
| M05C | 2007 | 143 | 4 | 51 | 41.858 | P | 0.200 | 0.028  |
| M04C | 2007 | 143 | 4 | 51 | 41.962 | P | 0.200 | -0.528 |
| K02A | 2007 | 143 | 4 | 51 | 42.456 | P | 0.200 | -1.322 |
| P07A | 2007 | 143 | 4 | 51 | 42.569 | P | 0.200 | 0.539  |
| TPH  | 2007 | 143 | 4 | 51 | 42.591 | P | 0.200 | -0.144 |
| O06A | 2007 | 143 | 4 | 51 | 43.146 | P | 0.200 | 0.617  |
| U11A | 2007 | 143 | 4 | 51 | 43.604 | P | 0.200 | 0.280  |
| YBH  | 2007 | 143 | 4 | 51 | 43.866 | P | 0.200 | -1.988 |
| ELFS | 2007 | 143 | 4 | 51 | 44.132 | P | 0.200 | 0.180  |
| Q07A | 2007 | 143 | 4 | 51 | 44.187 | P | 0.200 | -0.460 |
| TPNV | 2007 | 143 | 4 | 51 | 44.241 | P | 0.200 | -0.082 |
| S09A | 2007 | 143 | 4 | 51 | 44.264 | P | 0.200 | -0.144 |
| R08A | 2007 | 143 | 4 | 51 | 44.379 | P | 0.200 | -0.439 |
| SNF9 | 2007 | 143 | 4 | 51 | 44.953 | P | 0.200 | 0.147  |
| SNE9 | 2007 | 143 | 4 | 51 | 45.160 | P | 0.200 | 0.438  |
| M03C | 2007 | 143 | 4 | 51 | 45.250 | P | 0.200 | -0.636 |
| SND9 | 2007 | 143 | 4 | 51 | 45.549 | P | 0.200 | 0.526  |
| HATC | 2007 | 143 | 4 | 51 | 45.598 | P | 0.200 | -0.010 |
| P06A | 2007 | 143 | 4 | 51 | 45.740 | P | 0.200 | 0.426  |
| L02A | 2007 | 143 | 4 | 51 | 46.046 | P | 0.200 | -0.942 |
| SNB9 | 2007 | 143 | 4 | 51 | 46.114 | P | 0.200 | 0.324  |
| BEK  | 2007 | 143 | 4 | 51 | 46.187 | P | 0.200 | -0.019 |
| V11A | 2007 | 143 | 4 | 51 | 46.360 | P | 0.200 | -0.056 |
| M02C | 2007 | 143 | 4 | 51 | 46.506 | P | 0.200 | -1.578 |
| SNF8 | 2007 | 143 | 4 | 51 | 46.661 | P | 0.200 | 0.058  |
| O04C | 2007 | 143 | 4 | 51 | 46.696 | P | 0.200 | -0.081 |
| K01A | 2007 | 143 | 4 | 51 | 46.787 | P | 0.200 | -0.307 |
| SND8 | 2007 | 143 | 4 | 51 | 46.930 | P | 0.200 | 0.130  |
| WCN  | 2007 | 143 | 4 | 51 | 47.082 | P | 0.200 | 0.339  |
| SN98 | 2007 | 143 | 4 | 51 | 47.196 | P | 0.200 | -0.023 |

|      |      |     |   |    |        |   |       |        |
|------|------|-----|---|----|--------|---|-------|--------|
| SNA8 | 2007 | 143 | 4 | 51 | 47.240 | P | 0.200 | 0.063  |
| SNC8 | 2007 | 143 | 4 | 51 | 47.392 | P | 0.200 | 0.418  |
| U10A | 2007 | 143 | 4 | 51 | 47.504 | P | 0.200 | 0.389  |
| O05C | 2007 | 143 | 4 | 51 | 47.702 | P | 0.200 | -0.075 |
| SNE7 | 2007 | 143 | 4 | 51 | 47.845 | P | 0.200 | -0.036 |
| SNG7 | 2007 | 143 | 4 | 51 | 47.999 | P | 0.200 | -0.104 |
| SND7 | 2007 | 143 | 4 | 51 | 48.146 | P | 0.200 | -0.100 |
| GRA  | 2007 | 143 | 4 | 51 | 48.483 | P | 0.200 | 0.142  |
| WDC  | 2007 | 143 | 4 | 51 | 48.851 | P | 0.200 | -1.906 |
| FUR  | 2007 | 143 | 4 | 51 | 48.987 | P | 0.200 | 0.118  |
| R06C | 2007 | 143 | 4 | 51 | 49.106 | P | 0.200 | -0.243 |
| S08C | 2007 | 143 | 4 | 51 | 49.232 | P | 0.200 | -0.240 |
| SNC7 | 2007 | 143 | 4 | 51 | 49.291 | P | 0.200 | 0.127  |
| SN87 | 2007 | 143 | 4 | 51 | 49.399 | P | 0.200 | 0.109  |
| SNF6 | 2007 | 143 | 4 | 51 | 49.428 | P | 0.200 | -0.415 |
| SHO  | 2007 | 143 | 4 | 51 | 49.434 | P | 0.200 | 0.137  |
| R07C | 2007 | 143 | 4 | 51 | 49.760 | P | 0.200 | -0.090 |
| SNE6 | 2007 | 143 | 4 | 51 | 49.788 | P | 0.200 | -0.076 |
| P05C | 2007 | 143 | 4 | 51 | 49.987 | P | 0.200 | 0.074  |
| SNG5 | 2007 | 143 | 4 | 51 | 50.294 | P | 0.200 | -0.975 |
| M01C | 2007 | 143 | 4 | 51 | 50.311 | P | 0.200 | -0.145 |
| R05C | 2007 | 143 | 4 | 51 | 50.379 | P | 0.200 | -0.578 |
| SNC6 | 2007 | 143 | 4 | 51 | 50.538 | P | 0.200 | 0.104  |
| TUQ  | 2007 | 143 | 4 | 51 | 50.556 | P | 0.200 | 0.282  |
| SNE5 | 2007 | 143 | 4 | 51 | 50.701 | P | 0.200 | -0.766 |
| O03C | 2007 | 143 | 4 | 51 | 50.788 | P | 0.200 | -0.975 |
| SND5 | 2007 | 143 | 4 | 51 | 51.048 | P | 0.200 | -0.495 |
| ORV  | 2007 | 143 | 4 | 51 | 51.096 | P | 0.200 | -0.749 |
| SNC5 | 2007 | 143 | 4 | 51 | 51.483 | P | 0.200 | -0.182 |
| N02C | 2007 | 143 | 4 | 51 | 51.560 | P | 0.200 | -0.984 |
| MLAC | 2007 | 143 | 4 | 51 | 51.632 | P | 0.200 | 0.328  |
| SNA5 | 2007 | 143 | 4 | 51 | 51.783 | P | 0.200 | -0.298 |
| SNB5 | 2007 | 143 | 4 | 51 | 51.784 | P | 0.200 | -0.172 |
| TIN  | 2007 | 143 | 4 | 51 | 51.836 | P | 0.200 | 0.268  |
| SNE4 | 2007 | 143 | 4 | 51 | 51.967 | P | 0.200 | -0.843 |
| SN75 | 2007 | 143 | 4 | 51 | 52.236 | P | 0.200 | -0.005 |
| SN85 | 2007 | 143 | 4 | 51 | 52.247 | P | 0.200 | -0.223 |
| SN55 | 2007 | 143 | 4 | 51 | 52.286 | P | 0.200 | 0.242  |
| SND4 | 2007 | 143 | 4 | 51 | 52.317 | P | 0.200 | -0.765 |
| O02C | 2007 | 143 | 4 | 51 | 52.338 | P | 0.200 | -1.396 |
| SNC4 | 2007 | 143 | 4 | 51 | 52.455 | P | 0.200 | -0.760 |
| LAVA | 2007 | 143 | 4 | 51 | 52.459 | P | 0.200 | -0.556 |
| SUTB | 2007 | 143 | 4 | 51 | 53.108 | P | 0.200 | -1.332 |
| SNA4 | 2007 | 143 | 4 | 51 | 53.166 | P | 0.200 | -0.312 |
| SN95 | 2007 | 143 | 4 | 51 | 53.360 | P | 0.200 | 0.059  |
| SN84 | 2007 | 143 | 4 | 51 | 53.567 | P | 0.200 | -0.165 |
| SN14 | 2007 | 143 | 4 | 51 | 53.687 | P | 0.200 | 0.075  |
| SN34 | 2007 | 143 | 4 | 51 | 53.728 | P | 0.200 | 0.382  |
| SLA  | 2007 | 143 | 4 | 51 | 53.911 | P | 0.200 | 0.439  |
| SN64 | 2007 | 143 | 4 | 51 | 53.918 | P | 0.200 | 0.555  |
| MPM  | 2007 | 143 | 4 | 51 | 53.953 | P | 0.200 | 0.246  |
| SN74 | 2007 | 143 | 4 | 51 | 54.027 | P | 0.200 | 0.244  |
| SNB3 | 2007 | 143 | 4 | 51 | 54.107 | P | 0.200 | -0.564 |
| CWC  | 2007 | 143 | 4 | 51 | 54.202 | P | 0.200 | 0.210  |
| SNA3 | 2007 | 143 | 4 | 51 | 54.311 | P | 0.200 | -0.356 |
| SNC3 | 2007 | 143 | 4 | 51 | 54.398 | P | 0.200 | -0.478 |
| S06C | 2007 | 143 | 4 | 51 | 54.414 | P | 0.200 | 0.617  |
| Q04C | 2007 | 143 | 4 | 51 | 54.717 | P | 0.200 | -0.173 |
| CMB  | 2007 | 143 | 4 | 51 | 54.777 | P | 0.200 | -0.362 |
| GSC  | 2007 | 143 | 4 | 51 | 54.960 | P | 0.200 | 0.468  |
| GASB | 2007 | 143 | 4 | 51 | 54.963 | P | 0.200 | -1.167 |
| SN93 | 2007 | 143 | 4 | 51 | 54.983 | P | 0.200 | -0.251 |
| SN63 | 2007 | 143 | 4 | 51 | 55.178 | P | 0.200 | 0.566  |

|      |      |     |    |         |          |           |         |            |
|------|------|-----|----|---------|----------|-----------|---------|------------|
| HEC  | 2007 | 143 | 4  | 51      | 55.411   | P         | 0.200   | 0.448      |
| SN43 | 2007 | 143 | 4  | 51      | 55.550   | P         | 0.200   | 0.631      |
| R04C | 2007 | 143 | 4  | 51      | 56.035   | P         | 0.200   | 0.122      |
| HELL | 2007 | 143 | 4  | 51      | 56.792   | P         | 0.200   | 0.412      |
| LRL  | 2007 | 143 | 4  | 51      | 57.437   | P         | 0.200   | 0.285      |
| T06C | 2007 | 143 | 4  | 51      | 57.493   | P         | 0.200   | 0.162      |
| RRX  | 2007 | 143 | 4  | 51      | 57.950   | P         | 0.200   | 0.655      |
| O01C | 2007 | 143 | 4  | 51      | 58.030   | P         | 0.200   | 0.370      |
| MNRC | 2007 | 143 | 4  | 51      | 58.476   | P         | 0.200   | -0.283     |
| S05C | 2007 | 143 | 4  | 51      | 58.567   | P         | 0.200   | 0.531      |
| Q03C | 2007 | 143 | 4  | 51      | 58.570   | P         | 0.200   | 0.213      |
| RCT  | 2007 | 143 | 4  | 51      | 58.575   | P         | 0.200   | -0.455     |
| VES  | 2007 | 143 | 4  | 52      | 0.325    | P         | 0.200   | -0.383     |
| VTV  | 2007 | 143 | 4  | 52      | 0.845    | P         | 0.200   | 0.641      |
| BBR  | 2007 | 143 | 4  | 52      | 1.048    | P         | 0.200   | 0.887      |
| S04C | 2007 | 143 | 4  | 52      | 1.232    | P         | 0.200   | 0.069      |
| CVS  | 2007 | 143 | 4  | 52      | 1.533    | P         | 0.200   | 0.257      |
| ADO  | 2007 | 143 | 4  | 52      | 1.603    | P         | 0.200   | 1.031      |
| BDM  | 2007 | 143 | 4  | 52      | 1.769    | P         | 0.200   | 0.671      |
| EDW2 | 2007 | 143 | 4  | 52      | 1.776    | P         | 0.200   | 0.598      |
| SVD  | 2007 | 143 | 4  | 52      | 2.156    | P         | 0.200   | 0.783      |
| T05C | 2007 | 143 | 4  | 52      | 2.673    | P         | 0.200   | 1.113      |
| BRIB | 2007 | 143 | 4  | 52      | 2.713    | P         | 0.200   | 0.444      |
| WENL | 2007 | 143 | 4  | 52      | 2.778    | P         | 0.200   | 0.565      |
| U05C | 2007 | 143 | 4  | 52      | 2.841    | P         | 0.200   | 0.681      |
| BRK  | 2007 | 143 | 4  | 52      | 3.093    | P         | 0.200   | 0.233      |
| V05C | 2007 | 143 | 4  | 52      | 3.392    | P         | 0.200   | -0.341     |
| BFS  | 2007 | 143 | 4  | 52      | 3.503    | P         | 0.200   | 0.355      |
| MHC  | 2007 | 143 | 4  | 52      | 3.713    | P         | 0.200   | 0.462      |
| ARV  | 2007 | 143 | 4  | 52      | 4.022    | P         | 0.200   | 0.900      |
| PACP | 2007 | 143 | 4  | 52      | 4.197    | P         | 0.200   | 0.774      |
| VCS  | 2007 | 143 | 4  | 52      | 4.298    | P         | 0.200   | 0.602      |
| CHF  | 2007 | 143 | 4  | 52      | 4.622    | P         | 0.200   | 0.612      |
| MWC  | 2007 | 143 | 4  | 52      | 4.884    | P         | 0.200   | 0.167      |
| JRSC | 2007 | 143 | 4  | 52      | 4.996    | P         | 0.200   | -0.091     |
| PASC | 2007 | 143 | 4  | 52      | 5.231    | P         | 0.200   | -0.024     |
| DEC  | 2007 | 143 | 4  | 52      | 5.558    | P         | 0.200   | -0.003     |
| SAO  | 2007 | 143 | 4  | 52      | 5.688    | P         | 0.200   | 0.530      |
| PKD  | 2007 | 143 | 4  | 52      | 5.846    | P         | 0.200   | -0.022     |
| BNLO | 2007 | 143 | 4  | 52      | 6.276    | P         | 0.200   | -0.047     |
| SMM  | 2007 | 143 | 4  | 52      | 6.287    | P         | 0.200   | -0.405     |
| DJJ  | 2007 | 143 | 4  | 52      | 6.345    | P         | 0.200   | -0.399     |
| SDD  | 2007 | 143 | 4  | 52      | 6.812    | P         | 0.200   | 0.517      |
| HAST | 2007 | 143 | 4  | 52      | 7.606    | P         | 0.200   | 0.052      |
| PHL  | 2007 | 143 | 4  | 52      | 7.925    | P         | 0.200   | -0.513     |
| RPV  | 2007 | 143 | 4  | 52      | 8.314    | P         | 0.200   | 0.191      |
| V03C | 2007 | 143 | 4  | 52      | 8.352    | P         | 0.200   | 0.309      |
| V04C | 2007 | 143 | 4  | 52      | 8.644    | P         | 0.200   | 0.069      |
| LGU  | 2007 | 143 | 4  | 52      | 8.791    | P         | 0.200   | -0.189     |
| MPP  | 2007 | 143 | 4  | 52      | 8.862    | P         | 0.200   | 0.624      |
| CIA  | 2007 | 143 | 4  | 52      | 10.313   | P         | 0.200   | 0.418      |
| SBC  | 2007 | 143 | 4  | 52      | 10.661   | P         | 0.200   | 0.849      |
| SCZ2 | 2007 | 143 | 4  | 52      | 11.771   | P         | 0.200   | 0.050      |
| SNCC | 2007 | 143 | 4  | 52      | 15.325   | P         | 0.200   | 0.404      |
|      |      |     |    |         |          |           |         |            |
| 2007 | 43   | 10  | 35 | 22.0140 | 35.79600 | -10.33400 | 10.0000 | 309 -0.006 |
| Q11A | 2007 | 43  | 10 | 47      | 23.872   | P         | 0.200   | -0.792     |
| P10A | 2007 | 43  | 10 | 47      | 24.697   | P         | 0.200   | -0.169     |
| O09A | 2007 | 43  | 10 | 47      | 25.290   | P         | 0.200   | -0.135     |
| N08A | 2007 | 43  | 10 | 47      | 26.245   | P         | 0.200   | -0.392     |
| L07A | 2007 | 43  | 10 | 47      | 26.629   | P         | 0.200   | 0.343      |
| P09A | 2007 | 43  | 10 | 47      | 26.898   | P         | 0.200   | -0.581     |
| Q10A | 2007 | 43  | 10 | 47      | 27.086   | P         | 0.200   | -0.188     |

|      |      |    |    |    |        |   |       |        |
|------|------|----|----|----|--------|---|-------|--------|
| O08A | 2007 | 43 | 10 | 47 | 27.925 | P | 0.200 | -0.413 |
| M07A | 2007 | 43 | 10 | 47 | 27.945 | P | 0.200 | 0.243  |
| J05A | 2007 | 43 | 10 | 47 | 28.002 | P | 0.200 | 0.228  |
| I04A | 2007 | 43 | 10 | 47 | 28.197 | P | 0.200 | -1.217 |
| R10A | 2007 | 43 | 10 | 47 | 28.538 | P | 0.200 | -0.216 |
| K05A | 2007 | 43 | 10 | 47 | 28.684 | P | 0.200 | -0.051 |
| S11A | 2007 | 43 | 10 | 47 | 28.723 | P | 0.200 | -0.307 |
| N07B | 2007 | 43 | 10 | 47 | 29.024 | P | 0.200 | -0.274 |
| Q09A | 2007 | 43 | 10 | 47 | 29.241 | P | 0.200 | -0.707 |
| P08A | 2007 | 43 | 10 | 47 | 29.588 | P | 0.200 | -0.270 |
| J04A | 2007 | 43 | 10 | 47 | 30.074 | P | 0.200 | -0.591 |
| S10A | 2007 | 43 | 10 | 47 | 30.396 | P | 0.200 | -0.510 |
| O07A | 2007 | 43 | 10 | 47 | 30.668 | P | 0.200 | -0.253 |
| I03A | 2007 | 43 | 10 | 47 | 30.806 | P | 0.200 | -0.445 |
| R09A | 2007 | 43 | 10 | 47 | 30.904 | P | 0.200 | -0.561 |
| L05A | 2007 | 43 | 10 | 47 | 31.045 | P | 0.200 | 0.262  |
| K04A | 2007 | 43 | 10 | 47 | 31.056 | P | 0.200 | -0.522 |
| Q08A | 2007 | 43 | 10 | 47 | 31.250 | P | 0.200 | -1.048 |
| J03A | 2007 | 43 | 10 | 47 | 31.440 | P | 0.200 | -1.163 |
| U11A | 2007 | 43 | 10 | 47 | 31.639 | P | 0.200 | -0.034 |
| TPH  | 2007 | 43 | 10 | 47 | 31.859 | P | 0.200 | -0.777 |
| N06A | 2007 | 43 | 10 | 47 | 32.102 | P | 0.200 | 0.078  |
| M06C | 2007 | 43 | 10 | 47 | 32.676 | P | 0.200 | 0.145  |
| P07A | 2007 | 43 | 10 | 47 | 32.858 | P | 0.200 | -0.291 |
| S09A | 2007 | 43 | 10 | 47 | 33.032 | P | 0.200 | -0.707 |
| L04A | 2007 | 43 | 10 | 47 | 33.069 | P | 0.200 | -0.511 |
| V11A | 2007 | 43 | 10 | 47 | 33.617 | P | 0.200 | -0.198 |
| R08A | 2007 | 43 | 10 | 47 | 33.790 | P | 0.200 | -0.828 |
| M05C | 2007 | 43 | 10 | 47 | 33.937 | P | 0.200 | -0.153 |
| DBO  | 2007 | 43 | 10 | 47 | 33.960 | P | 0.200 | -0.363 |
| O06A | 2007 | 43 | 10 | 47 | 33.965 | P | 0.200 | 0.035  |
| Q07A | 2007 | 43 | 10 | 47 | 33.968 | P | 0.200 | -0.910 |
| J02A | 2007 | 43 | 10 | 47 | 34.026 | P | 0.200 | -0.351 |
| HUMO | 2007 | 43 | 10 | 47 | 34.095 | P | 0.200 | -1.029 |
| M04C | 2007 | 43 | 10 | 47 | 34.470 | P | 0.200 | -0.458 |
| U10A | 2007 | 43 | 10 | 47 | 35.211 | P | 0.200 | 0.286  |
| ELFS | 2007 | 43 | 10 | 47 | 35.373 | P | 0.200 | -0.076 |
| SNF9 | 2007 | 43 | 10 | 47 | 35.423 | P | 0.200 | -0.467 |
| SNE9 | 2007 | 43 | 10 | 47 | 35.488 | P | 0.200 | -0.190 |
| SND9 | 2007 | 43 | 10 | 47 | 35.747 | P | 0.200 | -0.052 |
| K02A | 2007 | 43 | 10 | 47 | 35.828 | P | 0.200 | -0.532 |
| P06A | 2007 | 43 | 10 | 47 | 35.892 | P | 0.200 | -0.089 |
| SNB9 | 2007 | 43 | 10 | 47 | 35.987 | P | 0.200 | -0.176 |
| YBH  | 2007 | 43 | 10 | 47 | 36.150 | P | 0.200 | -1.390 |
| SHO  | 2007 | 43 | 10 | 47 | 36.483 | P | 0.200 | 0.207  |
| GRA  | 2007 | 43 | 10 | 47 | 36.522 | P | 0.200 | 0.071  |
| HATC | 2007 | 43 | 10 | 47 | 36.684 | P | 0.200 | -0.180 |
| M03C | 2007 | 43 | 10 | 47 | 36.694 | P | 0.200 | -0.641 |
| SN98 | 2007 | 43 | 10 | 47 | 36.714 | P | 0.200 | -0.334 |
| FUR  | 2007 | 43 | 10 | 47 | 36.721 | P | 0.200 | 0.301  |
| TUQ  | 2007 | 43 | 10 | 47 | 36.841 | P | 0.200 | 0.133  |
| SNA8 | 2007 | 43 | 10 | 47 | 36.861 | P | 0.200 | -0.328 |
| WCN  | 2007 | 43 | 10 | 47 | 36.863 | P | 0.200 | -0.076 |
| SND8 | 2007 | 43 | 10 | 47 | 36.879 | P | 0.200 | -0.358 |
| SNF8 | 2007 | 43 | 10 | 47 | 36.921 | P | 0.200 | -0.312 |
| SNC8 | 2007 | 43 | 10 | 47 | 37.145 | P | 0.200 | -0.058 |
| O04C | 2007 | 43 | 10 | 47 | 37.165 | P | 0.200 | -0.412 |
| S08C | 2007 | 43 | 10 | 47 | 37.787 | P | 0.200 | -0.111 |
| O05C | 2007 | 43 | 10 | 47 | 37.908 | P | 0.200 | -0.227 |
| SND7 | 2007 | 43 | 10 | 47 | 37.979 | P | 0.200 | -0.398 |
| SNG7 | 2007 | 43 | 10 | 47 | 38.103 | P | 0.200 | -0.458 |
| M02C | 2007 | 43 | 10 | 47 | 38.212 | P | 0.200 | -0.986 |
| SNA7 | 2007 | 43 | 10 | 47 | 38.249 | P | 0.200 | -0.144 |

|      |      |    |    |    |        |   |       |        |
|------|------|----|----|----|--------|---|-------|--------|
| L02A | 2007 | 43 | 10 | 47 | 38.448 | P | 0.200 | -0.171 |
| SN97 | 2007 | 43 | 10 | 47 | 38.584 | P | 0.200 | -0.067 |
| R06C | 2007 | 43 | 10 | 47 | 38.704 | P | 0.200 | 0.131  |
| SNC7 | 2007 | 43 | 10 | 47 | 38.735 | P | 0.200 | -0.271 |
| SNF6 | 2007 | 43 | 10 | 47 | 38.957 | P | 0.200 | -0.754 |
| SNB7 | 2007 | 43 | 10 | 47 | 38.983 | P | 0.200 | 0.000  |
| R07C | 2007 | 43 | 10 | 47 | 38.997 | P | 0.200 | 0.319  |
| WDC  | 2007 | 43 | 10 | 47 | 39.117 | P | 0.200 | -1.820 |
| SNE6 | 2007 | 43 | 10 | 47 | 39.178 | P | 0.200 | -0.396 |
| TIN  | 2007 | 43 | 10 | 47 | 39.561 | P | 0.200 | 0.282  |
| SNC6 | 2007 | 43 | 10 | 47 | 39.646 | P | 0.200 | -0.199 |
| SNB6 | 2007 | 43 | 10 | 47 | 39.752 | P | 0.200 | -0.277 |
| SNG5 | 2007 | 43 | 10 | 47 | 39.841 | P | 0.200 | -1.076 |
| R05C | 2007 | 43 | 10 | 47 | 39.856 | P | 0.200 | -0.189 |
| SNE5 | 2007 | 43 | 10 | 47 | 39.944 | P | 0.200 | -0.892 |
| MLAC | 2007 | 43 | 10 | 47 | 40.040 | P | 0.200 | 0.499  |
| SN86 | 2007 | 43 | 10 | 47 | 40.052 | P | 0.200 | 0.167  |
| SND5 | 2007 | 43 | 10 | 47 | 40.161 | P | 0.200 | -0.632 |
| ORV  | 2007 | 43 | 10 | 47 | 40.369 | P | 0.200 | -0.921 |
| SLA  | 2007 | 43 | 10 | 47 | 40.387 | P | 0.200 | 0.512  |
| SNC5 | 2007 | 43 | 10 | 47 | 40.413 | P | 0.200 | -0.375 |
| HEC  | 2007 | 43 | 10 | 47 | 40.434 | P | 0.200 | 0.173  |
| GSC  | 2007 | 43 | 10 | 47 | 40.450 | P | 0.200 | 0.205  |
| MPM  | 2007 | 43 | 10 | 47 | 40.480 | P | 0.200 | 0.149  |
| SNB5 | 2007 | 43 | 10 | 47 | 40.609 | P | 0.200 | -0.348 |
| SNA5 | 2007 | 43 | 10 | 47 | 40.709 | P | 0.200 | -0.215 |
| SN55 | 2007 | 43 | 10 | 47 | 40.876 | P | 0.200 | 0.546  |
| SN96 | 2007 | 43 | 10 | 47 | 40.916 | P | 0.200 | 0.374  |
| SNE4 | 2007 | 43 | 10 | 47 | 41.021 | P | 0.200 | -0.853 |
| CWC  | 2007 | 43 | 10 | 47 | 41.046 | P | 0.200 | 0.237  |
| SND4 | 2007 | 43 | 10 | 47 | 41.142 | P | 0.200 | -0.788 |
| SN65 | 2007 | 43 | 10 | 47 | 41.195 | P | 0.200 | 0.652  |
| SN85 | 2007 | 43 | 10 | 47 | 41.220 | P | 0.200 | 0.216  |
| SN75 | 2007 | 43 | 10 | 47 | 41.228 | P | 0.200 | 0.549  |
| SNC4 | 2007 | 43 | 10 | 47 | 41.241 | P | 0.200 | -0.681 |
| SN14 | 2007 | 43 | 10 | 47 | 41.371 | P | 0.200 | 0.216  |
| LAVA | 2007 | 43 | 10 | 47 | 41.391 | P | 0.200 | -0.395 |
| SN34 | 2007 | 43 | 10 | 47 | 41.579 | P | 0.200 | 0.494  |
| SNA4 | 2007 | 43 | 10 | 47 | 41.848 | P | 0.200 | -0.143 |
| SN95 | 2007 | 43 | 10 | 47 | 41.867 | P | 0.200 | 0.157  |
| SUTB | 2007 | 43 | 10 | 47 | 41.914 | P | 0.200 | -1.254 |
| SN64 | 2007 | 43 | 10 | 47 | 42.092 | P | 0.200 | 0.612  |
| SN84 | 2007 | 43 | 10 | 47 | 42.172 | P | 0.200 | 0.244  |
| N02C | 2007 | 43 | 10 | 47 | 42.196 | P | 0.200 | -0.373 |
| O02C | 2007 | 43 | 10 | 47 | 42.505 | P | 0.200 | -0.657 |
| RRX  | 2007 | 43 | 10 | 47 | 42.543 | P | 0.200 | 0.283  |
| S06C | 2007 | 43 | 10 | 47 | 42.637 | P | 0.200 | 0.869  |
| SN12 | 2007 | 43 | 10 | 47 | 42.745 | P | 0.200 | 0.373  |
| LRL  | 2007 | 43 | 10 | 47 | 42.878 | P | 0.200 | 0.191  |
| SNA3 | 2007 | 43 | 10 | 47 | 42.902 | P | 0.200 | 0.022  |
| SNB3 | 2007 | 43 | 10 | 47 | 42.938 | P | 0.200 | 0.001  |
| SN43 | 2007 | 43 | 10 | 47 | 42.977 | P | 0.200 | 0.530  |
| HELL | 2007 | 43 | 10 | 47 | 43.111 | P | 0.200 | 0.091  |
| CMB  | 2007 | 43 | 10 | 47 | 43.147 | P | 0.200 | 0.114  |
| Q04C | 2007 | 43 | 10 | 47 | 43.262 | P | 0.200 | -0.080 |
| SNC3 | 2007 | 43 | 10 | 47 | 43.307 | P | 0.200 | 0.065  |
| SN93 | 2007 | 43 | 10 | 47 | 43.444 | P | 0.200 | 0.314  |
| T06C | 2007 | 43 | 10 | 47 | 44.056 | P | 0.200 | 0.008  |
| RCT  | 2007 | 43 | 10 | 47 | 44.224 | P | 0.200 | -0.755 |
| GASB | 2007 | 43 | 10 | 47 | 44.373 | P | 0.200 | -0.510 |
| BBR  | 2007 | 43 | 10 | 47 | 44.630 | P | 0.200 | 0.422  |
| VTV  | 2007 | 43 | 10 | 47 | 44.745 | P | 0.200 | 0.275  |
| JCC  | 2007 | 43 | 10 | 47 | 44.824 | P | 0.200 | 0.304  |



|      |      |    |    |         |          |           |         |        |
|------|------|----|----|---------|----------|-----------|---------|--------|
| ISA  | 2007 | 43 | 10 | 47      | 45.164   | P         | 0.200   | 0.524  |
| VES  | 2007 | 43 | 10 | 47      | 45.237   | P         | 0.200   | -0.823 |
| ADO  | 2007 | 43 | 10 | 47      | 45.280   | P         | 0.200   | 0.537  |
| S05C | 2007 | 43 | 10 | 47      | 45.371   | P         | 0.200   | 0.471  |
| SVD  | 2007 | 43 | 10 | 47      | 45.839   | P         | 0.200   | 0.829  |
| EDW2 | 2007 | 43 | 10 | 47      | 46.280   | P         | 0.200   | 0.714  |
| BFS  | 2007 | 43 | 10 | 47      | 46.951   | P         | 0.200   | 0.238  |
| Q03C | 2007 | 43 | 10 | 47      | 46.993   | P         | 0.200   | 0.890  |
| MNRC | 2007 | 43 | 10 | 47      | 47.181   | P         | 0.200   | 0.601  |
| O01C | 2007 | 43 | 10 | 47      | 47.189   | P         | 0.200   | 0.859  |
| VCS  | 2007 | 43 | 10 | 47      | 47.791   | P         | 0.200   | 0.341  |
| P01C | 2007 | 43 | 10 | 47      | 47.794   | P         | 0.200   | 0.570  |
| CHF  | 2007 | 43 | 10 | 47      | 47.923   | P         | 0.200   | 0.437  |
| S04C | 2007 | 43 | 10 | 47      | 47.953   | P         | 0.200   | 0.330  |
| U05C | 2007 | 43 | 10 | 47      | 48.113   | P         | 0.200   | 0.540  |
| MWC  | 2007 | 43 | 10 | 47      | 48.139   | P         | 0.200   | 0.133  |
| ARV  | 2007 | 43 | 10 | 47      | 48.298   | P         | 0.200   | 0.898  |
| V05C | 2007 | 43 | 10 | 47      | 48.412   | P         | 0.200   | -0.163 |
| PASC | 2007 | 43 | 10 | 47      | 48.482   | P         | 0.200   | 0.085  |
| T05C | 2007 | 43 | 10 | 47      | 48.672   | P         | 0.200   | 1.186  |
| BDM  | 2007 | 43 | 10 | 47      | 48.674   | P         | 0.200   | 0.768  |
| CVS  | 2007 | 43 | 10 | 47      | 48.687   | P         | 0.200   | 0.451  |
| DEC  | 2007 | 43 | 10 | 47      | 48.759   | P         | 0.200   | -0.007 |
| HOPS | 2007 | 43 | 10 | 47      | 49.013   | P         | 0.200   | 0.966  |
| WENL | 2007 | 43 | 10 | 47      | 49.303   | P         | 0.200   | 0.742  |
| SDD  | 2007 | 43 | 10 | 47      | 49.387   | P         | 0.200   | 0.664  |
| BRIB | 2007 | 43 | 10 | 47      | 49.430   | P         | 0.200   | 0.602  |
| DJJ  | 2007 | 43 | 10 | 47      | 49.541   | P         | 0.200   | -0.108 |
| OSI  | 2007 | 43 | 10 | 47      | 49.623   | P         | 0.200   | 0.874  |
| USC  | 2007 | 43 | 10 | 47      | 49.763   | P         | 0.200   | 0.382  |
| BRK  | 2007 | 43 | 10 | 47      | 49.821   | P         | 0.200   | 0.530  |
| BKS  | 2007 | 43 | 10 | 47      | 49.883   | P         | 0.200   | 0.726  |
| MHC  | 2007 | 43 | 10 | 47      | 49.986   | P         | 0.200   | 0.736  |
| PACP | 2007 | 43 | 10 | 47      | 50.186   | P         | 0.200   | 1.041  |
| PKD  | 2007 | 43 | 10 | 47      | 50.554   | P         | 0.200   | 0.053  |
| MCCM | 2007 | 43 | 10 | 47      | 50.607   | P         | 0.200   | 0.463  |
| TOV  | 2007 | 43 | 10 | 47      | 50.636   | P         | 0.200   | -0.037 |
| FMP  | 2007 | 43 | 10 | 47      | 50.733   | P         | 0.200   | 0.433  |
| U04C | 2007 | 43 | 10 | 47      | 50.739   | P         | 0.200   | 1.022  |
| SMM  | 2007 | 43 | 10 | 47      | 50.982   | P         | 0.200   | 0.371  |
| RPV  | 2007 | 43 | 10 | 47      | 51.049   | P         | 0.200   | 0.605  |
| JRSC | 2007 | 43 | 10 | 47      | 51.181   | P         | 0.200   | 0.363  |
| SAO  | 2007 | 43 | 10 | 47      | 51.204   | P         | 0.200   | 0.785  |
| LGU  | 2007 | 43 | 10 | 47      | 51.699   | P         | 0.200   | 0.146  |
| BNLO | 2007 | 43 | 10 | 47      | 51.991   | P         | 0.200   | 0.296  |
| FARB | 2007 | 43 | 10 | 47      | 52.234   | P         | 0.200   | 0.062  |
| CIA  | 2007 | 43 | 10 | 47      | 52.337   | P         | 0.200   | 0.654  |
| PHL  | 2007 | 43 | 10 | 47      | 52.490   | P         | 0.200   | 0.297  |
| HAST | 2007 | 43 | 10 | 47      | 52.579   | P         | 0.200   | 0.363  |
| MPP  | 2007 | 43 | 10 | 47      | 52.790   | P         | 0.200   | 1.204  |
| V03C | 2007 | 43 | 10 | 47      | 53.004   | P         | 0.200   | 0.714  |
| V04C | 2007 | 43 | 10 | 47      | 53.020   | P         | 0.200   | 0.530  |
| SBC  | 2007 | 43 | 10 | 47      | 53.383   | P         | 0.200   | 0.843  |
| SCZ2 | 2007 | 43 | 10 | 47      | 54.075   | P         | 0.200   | 0.325  |
| SNCC | 2007 | 43 | 10 | 47      | 56.385   | P         | 0.200   | 0.517  |
|      |      |    |    |         |          |           |         |        |
| 2007 | 95   | 3  | 56 | 51.0746 | 37.30600 | -24.62100 | 14.0000 |        |
| Q11A | 2007 | 95 | 4  | 7       | 53.069   | P         | 0.200   | -0.270 |
| R11A | 2007 | 95 | 4  | 7       | 54.494   | P         | 0.200   | -0.184 |
| O09A | 2007 | 95 | 4  | 7       | 55.648   | P         | 0.200   | 0.243  |
| Q10A | 2007 | 95 | 4  | 7       | 56.637   | P         | 0.200   | 0.092  |
| P09A | 2007 | 95 | 4  | 7       | 57.208   | P         | 0.200   | -0.100 |
| T11A | 2007 | 95 | 4  | 7       | 57.260   | P         | 0.200   | 0.479  |

|      |      |    |   |   |        |   |       |        |
|------|------|----|---|---|--------|---|-------|--------|
| N08A | 2007 | 95 | 4 | 7 | 57.313 | P | 0.200 | -0.020 |
| S11A | 2007 | 95 | 4 | 7 | 58.014 | P | 0.200 | 0.295  |
| L07A | 2007 | 95 | 4 | 7 | 58.835 | P | 0.200 | 0.786  |
| O08A | 2007 | 95 | 4 | 7 | 58.956 | P | 0.200 | -0.090 |
| Q09A | 2007 | 95 | 4 | 7 | 59.625 | P | 0.200 | -0.174 |
| M07A | 2007 | 95 | 4 | 7 | 59.794 | P | 0.200 | 0.510  |
| S10A | 2007 | 95 | 4 | 8 | 0.087  | P | 0.200 | -0.171 |
| N07B | 2007 | 95 | 4 | 8 | 0.556  | P | 0.200 | -0.075 |
| U11A | 2007 | 95 | 4 | 8 | 0.567  | P | 0.200 | 0.540  |
| R09A | 2007 | 95 | 4 | 8 | 0.970  | P | 0.200 | -0.229 |
| J05A | 2007 | 95 | 4 | 8 | 1.511  | P | 0.200 | 0.428  |
| Q08A | 2007 | 95 | 4 | 8 | 1.995  | P | 0.200 | -0.706 |
| K05A | 2007 | 95 | 4 | 8 | 2.062  | P | 0.200 | 0.356  |
| TPNV | 2007 | 95 | 4 | 8 | 2.288  | P | 0.200 | 0.213  |
| I04A | 2007 | 95 | 4 | 8 | 2.376  | P | 0.200 | -1.295 |
| V11A | 2007 | 95 | 4 | 8 | 2.676  | P | 0.200 | 0.446  |
| S09A | 2007 | 95 | 4 | 8 | 3.138  | P | 0.200 | -0.430 |
| J04A | 2007 | 95 | 4 | 8 | 4.050  | P | 0.200 | -0.552 |
| P07A | 2007 | 95 | 4 | 8 | 4.064  | P | 0.200 | -0.250 |
| L05A | 2007 | 95 | 4 | 8 | 4.136  | P | 0.200 | 0.505  |
| N06A | 2007 | 95 | 4 | 8 | 4.264  | P | 0.200 | 0.257  |
| R08A | 2007 | 95 | 4 | 8 | 4.436  | P | 0.200 | -0.653 |
| K04A | 2007 | 95 | 4 | 8 | 4.770  | P | 0.200 | -0.384 |
| U10A | 2007 | 95 | 4 | 8 | 4.957  | P | 0.200 | 0.965  |
| I03A | 2007 | 95 | 4 | 8 | 5.328  | P | 0.200 | -0.805 |
| M06C | 2007 | 95 | 4 | 8 | 5.357  | P | 0.200 | 0.326  |
| J03A | 2007 | 95 | 4 | 8 | 5.746  | P | 0.200 | -1.406 |
| SHO  | 2007 | 95 | 4 | 8 | 5.935  | P | 0.200 | 0.594  |
| O06A | 2007 | 95 | 4 | 8 | 5.966  | P | 0.200 | 0.102  |
| TUQ  | 2007 | 95 | 4 | 8 | 6.329  | P | 0.200 | 0.813  |
| GRA  | 2007 | 95 | 4 | 8 | 6.462  | P | 0.200 | 0.102  |
| FUR  | 2007 | 95 | 4 | 8 | 6.522  | P | 0.200 | 0.576  |
| Q07A | 2007 | 95 | 4 | 8 | 6.772  | P | 0.200 | 0.810  |
| L04A | 2007 | 95 | 4 | 8 | 6.841  | P | 0.200 | -0.399 |
| M05C | 2007 | 95 | 4 | 8 | 7.273  | P | 0.200 | 0.212  |
| SNB9 | 2007 | 95 | 4 | 8 | 7.501  | P | 0.200 | -0.315 |
| SNE9 | 2007 | 95 | 4 | 8 | 7.793  | P | 0.200 | -0.051 |
| P06A | 2007 | 95 | 4 | 8 | 7.807  | P | 0.200 | -0.065 |
| SND9 | 2007 | 95 | 4 | 8 | 7.905  | P | 0.200 | 0.086  |
| HUMO | 2007 | 95 | 4 | 8 | 7.990  | P | 0.200 | -1.603 |
| SNF9 | 2007 | 95 | 4 | 8 | 7.996  | P | 0.200 | -0.214 |
| SN98 | 2007 | 95 | 4 | 8 | 8.021  | P | 0.200 | -0.516 |
| M04C | 2007 | 95 | 4 | 8 | 8.108  | P | 0.200 | -0.337 |
| ELFS | 2007 | 95 | 4 | 8 | 8.127  | P | 0.200 | 0.066  |
| S08C | 2007 | 95 | 4 | 8 | 8.148  | P | 0.200 | -0.278 |
| DBO  | 2007 | 95 | 4 | 8 | 8.330  | P | 0.200 | -0.741 |
| J02A | 2007 | 95 | 4 | 8 | 8.367  | P | 0.200 | -1.026 |
| WCN  | 2007 | 95 | 4 | 8 | 8.495  | P | 0.200 | -0.219 |
| SNA8 | 2007 | 95 | 4 | 8 | 8.516  | P | 0.200 | -0.318 |
| BEK  | 2007 | 95 | 4 | 8 | 8.788  | P | 0.200 | -0.329 |
| SND8 | 2007 | 95 | 4 | 8 | 9.133  | P | 0.200 | -0.245 |
| SNC8 | 2007 | 95 | 4 | 8 | 9.251  | P | 0.200 | 0.027  |
| SNF8 | 2007 | 95 | 4 | 8 | 9.610  | P | 0.200 | -0.128 |
| HEC  | 2007 | 95 | 4 | 8 | 9.898  | P | 0.200 | 0.563  |
| YBH  | 2007 | 95 | 4 | 8 | 10.015 | P | 0.200 | -1.738 |
| HATC | 2007 | 95 | 4 | 8 | 10.045 | P | 0.200 | 0.000  |
| R07C | 2007 | 95 | 4 | 8 | 10.086 | P | 0.200 | 0.210  |
| O04C | 2007 | 95 | 4 | 8 | 10.107 | P | 0.200 | -0.338 |
| SN97 | 2007 | 95 | 4 | 8 | 10.225 | P | 0.200 | -0.232 |
| K02A | 2007 | 95 | 4 | 8 | 10.227 | P | 0.200 | -1.015 |
| TIN  | 2007 | 95 | 4 | 8 | 10.305 | P | 0.200 | 0.473  |
| GSC  | 2007 | 95 | 4 | 8 | 10.313 | P | 0.200 | 0.633  |
| SNA7 | 2007 | 95 | 4 | 8 | 10.466 | P | 0.200 | 0.225  |

|      |      |    |   |   |        |   |       |        |
|------|------|----|---|---|--------|---|-------|--------|
| M03C | 2007 | 95 | 4 | 8 | 10.482 | P | 0.200 | -0.561 |
| SNE7 | 2007 | 95 | 4 | 8 | 10.581 | P | 0.200 | -0.121 |
| SND7 | 2007 | 95 | 4 | 8 | 10.692 | P | 0.200 | -0.122 |
| O05C | 2007 | 95 | 4 | 8 | 10.798 | P | 0.200 | -0.057 |
| MPM  | 2007 | 95 | 4 | 8 | 10.805 | P | 0.200 | 0.516  |
| MLAC | 2007 | 95 | 4 | 8 | 10.856 | P | 0.200 | 0.283  |
| SNB7 | 2007 | 95 | 4 | 8 | 10.997 | P | 0.200 | -0.068 |
| SNC7 | 2007 | 95 | 4 | 8 | 11.088 | P | 0.200 | -0.156 |
| SNG7 | 2007 | 95 | 4 | 8 | 11.192 | P | 0.200 | -0.275 |
| CWC  | 2007 | 95 | 4 | 8 | 11.671 | P | 0.200 | 0.434  |
| SNB6 | 2007 | 95 | 4 | 8 | 11.839 | P | 0.200 | -0.327 |
| R05C | 2007 | 95 | 4 | 8 | 11.893 | P | 0.200 | -0.124 |
| SNE6 | 2007 | 95 | 4 | 8 | 11.982 | P | 0.200 | -0.208 |
| P05C | 2007 | 95 | 4 | 8 | 11.987 | P | 0.200 | 0.009  |
| SNC6 | 2007 | 95 | 4 | 8 | 11.993 | P | 0.200 | -0.167 |
| SNF6 | 2007 | 95 | 4 | 8 | 12.006 | P | 0.200 | -0.515 |
| M02C | 2007 | 95 | 4 | 8 | 12.196 | P | 0.200 | -1.268 |
| SN55 | 2007 | 95 | 4 | 8 | 12.222 | P | 0.200 | 0.490  |
| SN14 | 2007 | 95 | 4 | 8 | 12.328 | P | 0.200 | 0.233  |
| RRX  | 2007 | 95 | 4 | 8 | 12.512 | P | 0.200 | 0.652  |
| SN65 | 2007 | 95 | 4 | 8 | 12.680 | P | 0.200 | 0.597  |
| SN34 | 2007 | 95 | 4 | 8 | 12.709 | P | 0.200 | 0.441  |
| SN96 | 2007 | 95 | 4 | 8 | 12.717 | P | 0.200 | 0.217  |
| SNA5 | 2007 | 95 | 4 | 8 | 12.830 | P | 0.200 | -0.270 |
| L02A | 2007 | 95 | 4 | 8 | 12.904 | P | 0.200 | -0.592 |
| WDC  | 2007 | 95 | 4 | 8 | 12.950 | P | 0.200 | -1.927 |
| SN75 | 2007 | 95 | 4 | 8 | 12.956 | P | 0.200 | 0.594  |
| SNE5 | 2007 | 95 | 4 | 8 | 12.977 | P | 0.200 | -0.699 |
| SNG5 | 2007 | 95 | 4 | 8 | 13.015 | P | 0.200 | -1.007 |
| SNC5 | 2007 | 95 | 4 | 8 | 13.022 | P | 0.200 | -0.303 |
| SND5 | 2007 | 95 | 4 | 8 | 13.061 | P | 0.200 | -0.402 |
| SN85 | 2007 | 95 | 4 | 8 | 13.148 | P | 0.200 | 0.264  |
| LRL  | 2007 | 95 | 4 | 8 | 13.257 | P | 0.200 | 0.424  |
| ORV  | 2007 | 95 | 4 | 8 | 13.562 | P | 0.200 | -0.823 |
| SN64 | 2007 | 95 | 4 | 8 | 13.624 | P | 0.200 | 0.511  |
| O03C | 2007 | 95 | 4 | 8 | 13.770 | P | 0.200 | -1.238 |
| LAVA | 2007 | 95 | 4 | 8 | 13.776 | P | 0.200 | -0.487 |
| SN12 | 2007 | 95 | 4 | 8 | 13.801 | P | 0.200 | 0.270  |
| SNC4 | 2007 | 95 | 4 | 8 | 13.887 | P | 0.200 | -0.700 |
| SN95 | 2007 | 95 | 4 | 8 | 13.920 | P | 0.200 | 0.115  |
| SNE4 | 2007 | 95 | 4 | 8 | 13.933 | P | 0.200 | -0.870 |
| SN74 | 2007 | 95 | 4 | 8 | 14.107 | P | 0.200 | 0.358  |
| SND4 | 2007 | 95 | 4 | 8 | 14.111 | P | 0.200 | -0.642 |
| SNA4 | 2007 | 95 | 4 | 8 | 14.119 | P | 0.200 | -0.165 |
| SN84 | 2007 | 95 | 4 | 8 | 14.189 | P | 0.200 | 0.240  |
| HELL | 2007 | 95 | 4 | 8 | 14.252 | P | 0.200 | 0.076  |
| SN43 | 2007 | 95 | 4 | 8 | 14.377 | P | 0.200 | 0.434  |
| K01A | 2007 | 95 | 4 | 8 | 14.423 | P | 0.200 | -0.194 |
| SN63 | 2007 | 95 | 4 | 8 | 14.583 | P | 0.200 | 0.453  |
| BBR  | 2007 | 95 | 4 | 8 | 14.615 | P | 0.200 | 0.835  |
| VTV  | 2007 | 95 | 4 | 8 | 14.931 | P | 0.200 | 0.579  |
| CMB  | 2007 | 95 | 4 | 8 | 15.240 | P | 0.200 | 0.040  |
| SUTB | 2007 | 95 | 4 | 8 | 15.251 | P | 0.200 | -1.212 |
| SNA3 | 2007 | 95 | 4 | 8 | 15.299 | P | 0.200 | -0.003 |
| SNB3 | 2007 | 95 | 4 | 8 | 15.402 | P | 0.200 | -0.203 |
| SVD  | 2007 | 95 | 4 | 8 | 15.417 | P | 0.200 | 0.687  |
| T06C | 2007 | 95 | 4 | 8 | 15.569 | P | 0.200 | -0.145 |
| RCT  | 2007 | 95 | 4 | 8 | 15.583 | P | 0.200 | -0.673 |
| SN93 | 2007 | 95 | 4 | 8 | 15.605 | P | 0.200 | 0.084  |
| O02C | 2007 | 95 | 4 | 8 | 15.890 | P | 0.200 | -1.368 |
| SNC3 | 2007 | 95 | 4 | 8 | 15.930 | P | 0.200 | -0.112 |
| ISA  | 2007 | 95 | 4 | 8 | 16.094 | P | 0.200 | 0.710  |
| N02C | 2007 | 95 | 4 | 8 | 16.260 | P | 0.200 | -0.802 |

|      |      |    |   |   |        |   |       |        |
|------|------|----|---|---|--------|---|-------|--------|
| Q04C | 2007 | 95 | 4 | 8 | 16.276 | P | 0.200 | -0.034 |
| EDW2 | 2007 | 95 | 4 | 8 | 16.414 | P | 0.200 | 0.446  |
| VES  | 2007 | 95 | 4 | 8 | 16.481 | P | 0.200 | -0.739 |
| M01C | 2007 | 95 | 4 | 8 | 16.668 | P | 0.200 | 0.152  |
| R04C | 2007 | 95 | 4 | 8 | 16.955 | P | 0.200 | 0.551  |
| BFS  | 2007 | 95 | 4 | 8 | 17.004 | P | 0.200 | 0.140  |
| S05C | 2007 | 95 | 4 | 8 | 17.457 | P | 0.200 | 0.412  |
| GASB | 2007 | 95 | 4 | 8 | 17.873 | P | 0.200 | -1.027 |
| VCS  | 2007 | 95 | 4 | 8 | 18.086 | P | 0.200 | 0.173  |
| CHF  | 2007 | 95 | 4 | 8 | 18.254 | P | 0.200 | 0.308  |
| MWC  | 2007 | 95 | 4 | 8 | 18.501 | P | 0.200 | 0.021  |
| BAK  | 2007 | 95 | 4 | 8 | 18.605 | P | 0.200 | -0.332 |
| PASC | 2007 | 95 | 4 | 8 | 18.894 | P | 0.200 | -0.081 |
| ARV  | 2007 | 95 | 4 | 8 | 19.215 | P | 0.200 | 0.769  |
| DEC  | 2007 | 95 | 4 | 8 | 19.231 | P | 0.200 | -0.229 |
| U05C | 2007 | 95 | 4 | 8 | 19.688 | P | 0.200 | 0.099  |
| SDD  | 2007 | 95 | 4 | 8 | 19.732 | P | 0.200 | 0.796  |
| JCC  | 2007 | 95 | 4 | 8 | 19.818 | P | 0.200 | 0.236  |
| V05C | 2007 | 95 | 4 | 8 | 19.879 | P | 0.200 | -0.505 |
| DJJ  | 2007 | 95 | 4 | 8 | 19.964 | P | 0.200 | -0.454 |
| OSI  | 2007 | 95 | 4 | 8 | 20.177 | P | 0.200 | 0.458  |
| Q03C | 2007 | 95 | 4 | 8 | 20.275 | P | 0.200 | 0.743  |
| MNRC | 2007 | 95 | 4 | 8 | 20.592 | P | 0.200 | 0.239  |
| S04C | 2007 | 95 | 4 | 8 | 20.743 | P | 0.200 | 0.211  |
| T05C | 2007 | 95 | 4 | 8 | 21.015 | P | 0.200 | 1.119  |
| FMP  | 2007 | 95 | 4 | 8 | 21.455 | P | 0.200 | 0.485  |
| P01C | 2007 | 95 | 4 | 8 | 21.745 | P | 0.200 | 0.057  |
| RPV  | 2007 | 95 | 4 | 8 | 21.755 | P | 0.200 | 0.547  |
| O01C | 2007 | 95 | 4 | 8 | 21.783 | P | 0.200 | 0.595  |
| BDM  | 2007 | 95 | 4 | 8 | 21.877 | P | 0.200 | 0.662  |
| CVS  | 2007 | 95 | 4 | 8 | 22.293 | P | 0.200 | 0.278  |
| WENL | 2007 | 95 | 4 | 8 | 22.368 | P | 0.200 | 0.557  |
| SMM  | 2007 | 95 | 4 | 8 | 22.386 | P | 0.200 | -0.151 |
| PKD  | 2007 | 95 | 4 | 8 | 22.407 | P | 0.200 | -0.378 |
| LGU  | 2007 | 95 | 4 | 8 | 22.644 | P | 0.200 | -0.163 |
| BRIB | 2007 | 95 | 4 | 8 | 22.847 | P | 0.200 | 0.510  |
| PACP | 2007 | 95 | 4 | 8 | 22.894 | P | 0.200 | 0.857  |
| MHC  | 2007 | 95 | 4 | 8 | 22.963 | P | 0.200 | 0.568  |
| U04C | 2007 | 95 | 4 | 8 | 22.969 | P | 0.200 | 0.737  |
| HOPS | 2007 | 95 | 4 | 8 | 23.048 | P | 0.200 | 0.745  |
| BRK  | 2007 | 95 | 4 | 8 | 23.120 | P | 0.200 | 0.212  |
| CIA  | 2007 | 95 | 4 | 8 | 23.124 | P | 0.200 | 0.652  |
| BKS  | 2007 | 95 | 4 | 8 | 23.213 | P | 0.200 | 0.453  |
| SAO  | 2007 | 95 | 4 | 8 | 23.934 | P | 0.200 | 0.517  |
| PHL  | 2007 | 95 | 4 | 8 | 24.261 | P | 0.200 | -0.236 |
| MPP  | 2007 | 95 | 4 | 8 | 24.370 | P | 0.200 | 0.977  |
| JRSC | 2007 | 95 | 4 | 8 | 24.459 | P | 0.200 | 0.037  |
| MCCM | 2007 | 95 | 4 | 8 | 24.625 | P | 0.200 | 0.365  |
| SBC  | 2007 | 95 | 4 | 8 | 25.010 | P | 0.200 | 0.737  |
| V04C | 2007 | 95 | 4 | 8 | 25.133 | P | 0.200 | 0.099  |
| BNLO | 2007 | 95 | 4 | 8 | 25.319 | P | 0.200 | 0.106  |
| HAST | 2007 | 95 | 4 | 8 | 25.393 | P | 0.200 | 0.106  |
| SCZ2 | 2007 | 95 | 4 | 8 | 25.566 | P | 0.200 | 0.096  |
| V03C | 2007 | 95 | 4 | 8 | 25.685 | P | 0.200 | 0.535  |
| FARB | 2007 | 95 | 4 | 8 | 26.239 | P | 0.200 | -0.112 |
| SNCC | 2007 | 95 | 4 | 8 | 27.846 | P | 0.200 | 0.306  |

|      |      |     |    |         |          |           |         |        |       |
|------|------|-----|----|---------|----------|-----------|---------|--------|-------|
| 1988 | 212  | 5   | 52 | 10.2108 | 31.32000 | -41.11300 | 20.0000 | 418    | 0.000 |
| arc  | 1988 | 212 | 6  | 2       | 34.940   | P         | 0.200   | -0.165 |       |
| bmd  | 1988 | 212 | 6  | 2       | 35.380   | P         | 0.200   | 0.040  |       |
| jhn  | 1988 | 212 | 6  | 2       | 36.000   | P         | 0.200   | -0.020 |       |
| mnk  | 1988 | 212 | 6  | 2       | 34.980   | P         | 0.200   | -0.440 |       |
| WMD  | 1988 | 212 | 6  | 2       | 35.630   | P         | 0.200   | -0.168 |       |

|     |      |     |   |   |        |   |       |        |
|-----|------|-----|---|---|--------|---|-------|--------|
| CLC | 1988 | 212 | 6 | 2 | 31.310 | P | 0.200 | -0.187 |
| TEJ | 1988 | 212 | 6 | 2 | 38.850 | P | 0.200 | 0.456  |
| WCH | 1988 | 212 | 6 | 2 | 34.070 | P | 0.200 | 0.060  |
| WCS | 1988 | 212 | 6 | 2 | 31.900 | P | 0.200 | -0.021 |
| WHS | 1988 | 212 | 6 | 2 | 31.860 | P | 0.200 | 0.130  |
| WLH | 1988 | 212 | 6 | 2 | 34.690 | P | 0.200 | -0.046 |
| WOF | 1988 | 212 | 6 | 2 | 37.930 | P | 0.200 | 0.067  |
| WRC | 1988 | 212 | 6 | 2 | 31.490 | P | 0.200 | -0.106 |
| WVP | 1988 | 212 | 6 | 2 | 32.470 | P | 0.200 | -0.064 |
| XMS | 1988 | 212 | 6 | 2 | 30.870 | P | 0.200 | -0.059 |
| BLK | 1988 | 212 | 6 | 2 | 31.140 | P | 0.200 | -0.071 |
| BMT | 1988 | 212 | 6 | 2 | 38.400 | P | 0.200 | 0.115  |
| CAL | 1988 | 212 | 6 | 2 | 34.790 | P | 0.200 | -0.164 |
| DTP | 1988 | 212 | 6 | 2 | 34.060 | P | 0.200 | -0.119 |
| ISA | 1988 | 212 | 6 | 2 | 36.640 | P | 0.200 | 0.267  |
| WHV | 1988 | 212 | 6 | 2 | 37.190 | P | 0.200 | 0.180  |
| WJP | 1988 | 212 | 6 | 2 | 37.330 | P | 0.200 | 0.317  |

|      |     |   |    |         |          |           |         |     |        |
|------|-----|---|----|---------|----------|-----------|---------|-----|--------|
| 1988 | 173 | 6 | 26 | 19.7041 | 24.88100 | -45.82800 | 26.0000 | 402 | -0.001 |
|------|-----|---|----|---------|----------|-----------|---------|-----|--------|

|     |      |     |   |    |        |   |       |        |
|-----|------|-----|---|----|--------|---|-------|--------|
| twr | 1988 | 173 | 6 | 36 | 39.150 | P | 0.200 | -0.123 |
| jun | 1988 | 173 | 6 | 36 | 38.750 | P | 0.200 | -0.280 |
| wil | 1988 | 173 | 6 | 36 | 39.500 | P | 0.200 | 0.065  |
| cha | 1988 | 173 | 6 | 36 | 38.900 | P | 0.200 | -0.199 |
| bar | 1988 | 173 | 6 | 36 | 39.500 | P | 0.200 | -0.383 |
| BLK | 1988 | 173 | 6 | 36 | 34.600 | P | 0.200 | 0.203  |
| BMT | 1988 | 173 | 6 | 36 | 42.150 | P | 0.200 | 0.289  |
| CAL | 1988 | 173 | 6 | 36 | 38.350 | P | 0.200 | 0.019  |
| CLC | 1988 | 173 | 6 | 36 | 35.200 | P | 0.200 | -0.250 |
| FLS | 1988 | 173 | 6 | 36 | 33.600 | P | 0.200 | -0.054 |
| GSC | 1988 | 173 | 6 | 36 | 32.000 | P | 0.200 | 0.119  |
| HOD | 1988 | 173 | 6 | 36 | 34.950 | P | 0.200 | 0.076  |
| ISA | 1988 | 173 | 6 | 36 | 40.820 | P | 0.200 | 0.388  |
| JAW | 1988 | 173 | 6 | 36 | 38.450 | P | 0.200 | -0.096 |
| LRM | 1988 | 173 | 6 | 36 | 36.200 | P | 0.200 | -0.365 |
| SBK | 1988 | 173 | 6 | 36 | 36.450 | P | 0.200 | 0.079  |
| SRT | 1988 | 173 | 6 | 36 | 36.350 | P | 0.200 | -0.083 |
| TOW | 1988 | 173 | 6 | 36 | 36.600 | P | 0.200 | 0.278  |
| WBS | 1988 | 173 | 6 | 36 | 38.900 | P | 0.200 | -0.066 |
| WCH | 1988 | 173 | 6 | 36 | 38.300 | P | 0.200 | 0.127  |
| WCS | 1988 | 173 | 6 | 36 | 36.270 | P | 0.200 | 0.143  |
| WCX | 1988 | 173 | 6 | 36 | 35.200 | P | 0.200 | -0.412 |
| WHS | 1988 | 173 | 6 | 36 | 36.250 | P | 0.200 | 0.230  |
| WHV | 1988 | 173 | 6 | 36 | 41.400 | P | 0.200 | 0.459  |
| WJP | 1988 | 173 | 6 | 36 | 41.250 | P | 0.200 | 0.405  |
| WLH | 1988 | 173 | 6 | 36 | 39.200 | P | 0.200 | 0.000  |
| WOF | 1988 | 173 | 6 | 36 | 42.200 | P | 0.200 | 0.323  |
| WRC | 1988 | 173 | 6 | 36 | 35.550 | P | 0.200 | -0.136 |
| WSC | 1988 | 173 | 6 | 36 | 36.950 | P | 0.200 | -0.263 |
| WSH | 1988 | 173 | 6 | 36 | 34.750 | P | 0.200 | -0.416 |
| WVP | 1988 | 173 | 6 | 36 | 36.650 | P | 0.200 | -0.016 |
| XMS | 1988 | 173 | 6 | 36 | 34.500 | P | 0.200 | -0.063 |

|      |     |   |   |         |          |           |         |    |        |
|------|-----|---|---|---------|----------|-----------|---------|----|--------|
| 2005 | 360 | 9 | 9 | 54.7110 | 31.61600 | -40.88400 | 10.0000 | 54 | -0.031 |
|------|-----|---|---|---------|----------|-----------|---------|----|--------|

|      |      |     |   |    |        |   |       |        |
|------|------|-----|---|----|--------|---|-------|--------|
| TPNV | 2005 | 360 | 9 | 20 | 8.817  | P | 0.200 | 0.331  |
| TUQ  | 2005 | 360 | 9 | 20 | 10.403 | P | 0.200 | 0.236  |
| SHO  | 2005 | 360 | 9 | 20 | 11.149 | P | 0.200 | 0.390  |
| FUR  | 2005 | 360 | 9 | 20 | 13.213 | P | 0.200 | 0.731  |
| HEC  | 2005 | 360 | 9 | 20 | 13.762 | P | 0.200 | 0.015  |
| GRA  | 2005 | 360 | 9 | 20 | 13.961 | P | 0.200 | 0.073  |
| GSC  | 2005 | 360 | 9 | 20 | 15.233 | P | 0.200 | 0.254  |
| SN38 | 2005 | 360 | 9 | 20 | 15.812 | P | 0.200 | -0.866 |
| SN48 | 2005 | 360 | 9 | 20 | 16.617 | P | 0.200 | -0.755 |
| S08C | 2005 | 360 | 9 | 20 | 16.765 | P | 0.200 | -0.466 |

|      |      |     |   |    |        |   |       |        |
|------|------|-----|---|----|--------|---|-------|--------|
| MPM  | 2005 | 360 | 9 | 20 | 17.459 | P | 0.200 | 0.478  |
| SN26 | 2005 | 360 | 9 | 20 | 17.932 | P | 0.200 | -0.463 |
| SN47 | 2005 | 360 | 9 | 20 | 18.097 | P | 0.200 | -0.655 |
| TIN  | 2005 | 360 | 9 | 20 | 18.538 | P | 0.200 | 0.315  |
| SN45 | 2005 | 360 | 9 | 20 | 20.987 | P | 0.200 | -0.217 |
| BFS  | 2005 | 360 | 9 | 20 | 21.863 | P | 0.200 | -0.222 |
| EDW2 | 2005 | 360 | 9 | 20 | 22.327 | P | 0.200 | 0.206  |
| M05C | 2005 | 360 | 9 | 20 | 22.557 | P | 0.200 | 0.018  |
| HELL | 2005 | 360 | 9 | 20 | 23.083 | P | 0.200 | 0.076  |
| SN23 | 2005 | 360 | 9 | 20 | 23.142 | P | 0.200 | 0.087  |
| ISA  | 2005 | 360 | 9 | 20 | 23.390 | P | 0.200 | 0.695  |
| SN11 | 2005 | 360 | 9 | 20 | 23.428 | P | 0.200 | -0.893 |
| SN22 | 2005 | 360 | 9 | 20 | 23.583 | P | 0.200 | -0.326 |
| SN43 | 2005 | 360 | 9 | 20 | 23.854 | P | 0.200 | -0.023 |
| RCT  | 2005 | 360 | 9 | 20 | 24.324 | P | 0.200 | -0.535 |
| R05C | 2005 | 360 | 9 | 20 | 24.356 | P | 0.200 | 0.620  |
| SN53 | 2005 | 360 | 9 | 20 | 24.507 | P | 0.200 | 0.079  |
| S06C | 2005 | 360 | 9 | 20 | 24.552 | P | 0.200 | 0.264  |
| DEC  | 2005 | 360 | 9 | 20 | 24.731 | P | 0.200 | -0.658 |
| SN52 | 2005 | 360 | 9 | 20 | 25.148 | P | 0.200 | -0.133 |
| SN62 | 2005 | 360 | 9 | 20 | 25.504 | P | 0.200 | -0.181 |
| SN73 | 2005 | 360 | 9 | 20 | 25.777 | P | 0.200 | 0.003  |
| ARV  | 2005 | 360 | 9 | 20 | 26.525 | P | 0.200 | 0.851  |
| SN51 | 2005 | 360 | 9 | 20 | 26.558 | P | 0.200 | -0.157 |
| SN71 | 2005 | 360 | 9 | 20 | 27.482 | P | 0.200 | -0.079 |
| CIA  | 2005 | 360 | 9 | 20 | 27.782 | P | 0.200 | 0.017  |
| S05C | 2005 | 360 | 9 | 20 | 27.820 | P | 0.200 | 0.088  |
| MPP  | 2005 | 360 | 9 | 20 | 32.143 | P | 0.200 | 0.741  |
| U04C | 2005 | 360 | 9 | 20 | 32.547 | P | 0.200 | 0.063  |

|      |      |    |    |         |          |           |         |        |        |
|------|------|----|----|---------|----------|-----------|---------|--------|--------|
| 2006 | 20   | 8  | 53 | 53.9609 | 31.06600 | -41.42200 | 10.0000 | 106    | -0.011 |
| TUQ  | 2006 | 20 | 9  | 4       | 8.743    | P         | 0.200   | 0.502  |        |
| TPH  | 2006 | 20 | 9  | 4       | 8.751    | P         | 0.200   | -0.544 |        |
| SHO  | 2006 | 20 | 9  | 4       | 9.593    | P         | 0.200   | 0.710  |        |
| FUR  | 2006 | 20 | 9  | 4       | 11.724   | P         | 0.200   | 1.048  |        |
| HEC  | 2006 | 20 | 9  | 4       | 12.017   | P         | 0.200   | 0.229  |        |
| MNV  | 2006 | 20 | 9  | 4       | 12.274   | P         | 0.200   | -0.929 |        |
| GRA  | 2006 | 20 | 9  | 4       | 12.533   | P         | 0.200   | 0.389  |        |
| GSC  | 2006 | 20 | 9  | 4       | 13.493   | P         | 0.200   | 0.420  |        |
| SN28 | 2006 | 20 | 9  | 4       | 13.914   | P         | 0.200   | -0.419 |        |
| SN38 | 2006 | 20 | 9  | 4       | 14.556   | P         | 0.200   | -0.496 |        |
| SN48 | 2006 | 20 | 9  | 4       | 15.328   | P         | 0.200   | -0.436 |        |
| S08C | 2006 | 20 | 9  | 4       | 15.407   | P         | 0.200   | -0.143 |        |
| RRX  | 2006 | 20 | 9  | 4       | 15.561   | P         | 0.200   | 0.533  |        |
| MPM  | 2006 | 20 | 9  | 4       | 15.907   | P         | 0.200   | 0.752  |        |
| SN37 | 2006 | 20 | 9  | 4       | 16.139   | P         | 0.200   | -0.336 |        |
| SN16 | 2006 | 20 | 9  | 4       | 16.213   | P         | 0.200   | 0.194  |        |
| SN47 | 2006 | 20 | 9  | 4       | 16.848   | P         | 0.200   | -0.281 |        |
| BBR  | 2006 | 20 | 9  | 4       | 16.882   | P         | 0.200   | 0.565  |        |
| TIN  | 2006 | 20 | 9  | 4       | 17.044   | P         | 0.200   | 0.540  |        |
| SN36 | 2006 | 20 | 9  | 4       | 17.242   | P         | 0.200   | -0.168 |        |
| LRL  | 2006 | 20 | 9  | 4       | 17.663   | P         | 0.200   | 0.304  |        |
| CWC  | 2006 | 20 | 9  | 4       | 17.814   | P         | 0.200   | 0.688  |        |
| SN26 | 2006 | 20 | 9  | 4       | 18.090   | P         | 0.200   | 1.355  |        |
| M06C | 2006 | 20 | 9  | 4       | 18.266   | P         | 0.200   | -0.278 |        |
| R07C | 2006 | 20 | 9  | 4       | 18.491   | P         | 0.200   | 0.027  |        |
| SN15 | 2006 | 20 | 9  | 4       | 18.656   | P         | 0.200   | 0.567  |        |
| SN25 | 2006 | 20 | 9  | 4       | 19.103   | P         | 0.200   | 0.735  |        |
| BEK  | 2006 | 20 | 9  | 4       | 19.925   | P         | 0.200   | -0.989 |        |
| SN76 | 2006 | 20 | 9  | 4       | 20.002   | P         | 0.200   | -0.123 |        |
| BFS  | 2006 | 20 | 9  | 4       | 20.017   | P         | 0.200   | -0.107 |        |
| SN55 | 2006 | 20 | 9  | 4       | 20.527   | P         | 0.200   | 0.167  |        |
| EDW2 | 2006 | 20 | 9  | 4       | 20.596   | P         | 0.200   | 0.375  |        |

|      |      |    |   |   |        |   |       |        |
|------|------|----|---|---|--------|---|-------|--------|
| ELFS | 2006 | 20 | 9 | 4 | 20.622 | P | 0.200 | -0.426 |
| SN34 | 2006 | 20 | 9 | 4 | 20.627 | P | 0.200 | 0.511  |
| R06C | 2006 | 20 | 9 | 4 | 21.035 | P | 0.200 | 1.528  |
| SN44 | 2006 | 20 | 9 | 4 | 21.311 | P | 0.200 | 0.343  |
| M05C | 2006 | 20 | 9 | 4 | 21.317 | P | 0.200 | 0.043  |
| HELL | 2006 | 20 | 9 | 4 | 21.634 | P | 0.200 | 0.344  |
| SN23 | 2006 | 20 | 9 | 4 | 21.737 | P | 0.200 | 0.354  |
| ISA  | 2006 | 20 | 9 | 4 | 21.790 | P | 0.200 | 0.916  |
| SN22 | 2006 | 20 | 9 | 4 | 22.223 | P | 0.200 | -0.008 |
| SN21 | 2006 | 20 | 9 | 4 | 22.270 | P | 0.200 | -1.048 |
| SN85 | 2006 | 20 | 9 | 4 | 22.492 | P | 0.200 | -0.042 |
| RCT  | 2006 | 20 | 9 | 4 | 22.852 | P | 0.200 | -0.267 |
| DEC  | 2006 | 20 | 9 | 4 | 23.112 | P | 0.200 | -0.342 |
| SN53 | 2006 | 20 | 9 | 4 | 23.148 | P | 0.200 | 0.354  |
| R05C | 2006 | 20 | 9 | 4 | 23.159 | P | 0.200 | 0.941  |
| T06C | 2006 | 20 | 9 | 4 | 23.269 | P | 0.200 | -0.538 |
| S06C | 2006 | 20 | 9 | 4 | 23.280 | P | 0.200 | 0.584  |
| M04C | 2006 | 20 | 9 | 4 | 23.374 | P | 0.200 | -0.414 |
| VES  | 2006 | 20 | 9 | 4 | 23.472 | P | 0.200 | -0.018 |
| HATC | 2006 | 20 | 9 | 4 | 23.737 | P | 0.200 | -0.217 |
| SN52 | 2006 | 20 | 9 | 4 | 23.830 | P | 0.200 | 0.187  |
| SN62 | 2006 | 20 | 9 | 4 | 24.263 | P | 0.200 | 0.192  |
| LAVA | 2006 | 20 | 9 | 4 | 24.331 | P | 0.200 | -0.849 |
| O04C | 2006 | 20 | 9 | 4 | 24.334 | P | 0.200 | 0.889  |
| SN73 | 2006 | 20 | 9 | 4 | 24.508 | P | 0.200 | 0.325  |
| ARV  | 2006 | 20 | 9 | 4 | 24.844 | P | 0.200 | 1.016  |
| OSI  | 2006 | 20 | 9 | 4 | 24.854 | P | 0.200 | 0.403  |
| HUMO | 2006 | 20 | 9 | 4 | 24.873 | P | 0.200 | -2.064 |
| CMB  | 2006 | 20 | 9 | 4 | 24.932 | P | 0.200 | -0.050 |
| SN51 | 2006 | 20 | 9 | 4 | 25.190 | P | 0.200 | 0.115  |
| M03C | 2006 | 20 | 9 | 4 | 25.303 | P | 0.200 | -0.778 |
| YBH  | 2006 | 20 | 9 | 4 | 25.795 | P | 0.200 | -2.086 |
| SN71 | 2006 | 20 | 9 | 4 | 26.008 | P | 0.200 | 0.043  |
| ORV  | 2006 | 20 | 9 | 4 | 26.012 | P | 0.200 | -0.909 |
| DBO  | 2006 | 20 | 9 | 4 | 26.129 | P | 0.200 | -1.162 |
| S05C | 2006 | 20 | 9 | 4 | 26.519 | P | 0.200 | 0.408  |
| WDC  | 2006 | 20 | 9 | 4 | 26.906 | P | 0.200 | -2.603 |
| V05C | 2006 | 20 | 9 | 4 | 26.971 | P | 0.200 | -0.516 |
| O03C | 2006 | 20 | 9 | 4 | 27.006 | P | 0.200 | -1.497 |
| LGU  | 2006 | 20 | 9 | 4 | 27.249 | P | 0.200 | -0.188 |
| U05C | 2006 | 20 | 9 | 4 | 27.314 | P | 0.200 | -0.151 |
| M02C | 2006 | 20 | 9 | 4 | 27.410 | P | 0.200 | -1.888 |
| R04C | 2006 | 20 | 9 | 4 | 27.413 | P | 0.200 | 0.354  |
| Q04C | 2006 | 20 | 9 | 4 | 27.779 | P | 0.200 | -0.147 |
| SUTB | 2006 | 20 | 9 | 4 | 27.812 | P | 0.200 | -1.104 |
| SMM  | 2006 | 20 | 9 | 4 | 29.185 | P | 0.200 | -0.080 |
| O02C | 2006 | 20 | 9 | 4 | 29.523 | P | 0.200 | -2.150 |
| PKD  | 2006 | 20 | 9 | 4 | 29.869 | P | 0.200 | -0.756 |
| T05C | 2006 | 20 | 9 | 4 | 30.003 | P | 0.200 | 1.170  |
| MPP  | 2006 | 20 | 9 | 4 | 30.578 | P | 0.200 | 1.006  |
| N02C | 2006 | 20 | 9 | 4 | 31.134 | P | 0.200 | -1.496 |
| S04C | 2006 | 20 | 9 | 4 | 31.195 | P | 0.200 | 0.475  |
| Q03C | 2006 | 20 | 9 | 4 | 32.264 | P | 0.200 | 0.743  |
| U04C | 2006 | 20 | 9 | 4 | 32.432 | P | 0.200 | 1.629  |
| PACP | 2006 | 20 | 9 | 4 | 32.550 | P | 0.200 | 0.817  |
| V04C | 2006 | 20 | 9 | 4 | 32.626 | P | 0.200 | -0.267 |
| BDM  | 2006 | 20 | 9 | 4 | 33.112 | P | 0.200 | 0.738  |
| WENL | 2006 | 20 | 9 | 4 | 33.207 | P | 0.200 | 0.636  |
| SAO  | 2006 | 20 | 9 | 4 | 33.404 | P | 0.200 | 0.404  |
| MHC  | 2006 | 20 | 9 | 4 | 33.455 | P | 0.200 | 0.719  |
| CVS  | 2006 | 20 | 9 | 4 | 34.203 | P | 0.200 | 0.031  |
| V03C | 2006 | 20 | 9 | 4 | 34.217 | P | 0.200 | 0.395  |
| HAST | 2006 | 20 | 9 | 4 | 34.647 | P | 0.200 | 0.060  |

|      |      |    |   |   |        |   |       |        |
|------|------|----|---|---|--------|---|-------|--------|
| BKS  | 2006 | 20 | 9 | 4 | 34.676 | P | 0.200 | 0.455  |
| P01C | 2006 | 20 | 9 | 4 | 35.369 | P | 0.200 | -0.471 |
| JCC  | 2006 | 20 | 9 | 4 | 35.593 | P | 0.200 | -0.256 |
| HOPS | 2006 | 20 | 9 | 4 | 36.119 | P | 0.200 | 0.390  |
| BNLO | 2006 | 20 | 9 | 4 | 36.218 | P | 0.200 | 0.395  |
| O01C | 2006 | 20 | 9 | 4 | 36.525 | P | 0.200 | 0.026  |

|      |     |    |    |  |        |          |           |         |     |       |
|------|-----|----|----|--|--------|----------|-----------|---------|-----|-------|
| 2006 | 275 | 14 | 52 |  | 9.6857 | 36.71300 | -33.25800 | 10.0000 | 226 | 0.009 |
|------|-----|----|----|--|--------|----------|-----------|---------|-----|-------|

|      |      |     |    |   |        |   |       |        |
|------|------|-----|----|---|--------|---|-------|--------|
| Q11A | 2006 | 275 | 15 | 2 | 36.192 | P | 0.200 | -0.211 |
| O09A | 2006 | 275 | 15 | 2 | 39.675 | P | 0.200 | 0.136  |
| N08A | 2006 | 275 | 15 | 2 | 41.840 | P | 0.200 | -0.197 |
| L07A | 2006 | 275 | 15 | 2 | 44.408 | P | 0.200 | 0.741  |
| R09A | 2006 | 275 | 15 | 2 | 44.714 | P | 0.200 | -0.092 |
| M07A | 2006 | 275 | 15 | 2 | 44.911 | P | 0.200 | 0.246  |
| N07B | 2006 | 275 | 15 | 2 | 45.514 | P | 0.200 | -0.221 |
| TPH  | 2006 | 275 | 15 | 2 | 45.807 | P | 0.200 | -0.295 |
| Q08A | 2006 | 275 | 15 | 2 | 46.237 | P | 0.200 | -0.605 |
| S09A | 2006 | 275 | 15 | 2 | 46.689 | P | 0.200 | -0.443 |
| O07A | 2006 | 275 | 15 | 2 | 46.720 | P | 0.200 | -0.312 |
| R08A | 2006 | 275 | 15 | 2 | 48.642 | P | 0.200 | -0.536 |
| J05A | 2006 | 275 | 15 | 2 | 48.655 | P | 0.200 | 0.733  |
| TUQ  | 2006 | 275 | 15 | 2 | 48.955 | P | 0.200 | 0.935  |
| N06A | 2006 | 275 | 15 | 2 | 49.607 | P | 0.200 | 0.091  |
| FUR  | 2006 | 275 | 15 | 2 | 49.743 | P | 0.200 | 0.650  |
| GRA  | 2006 | 275 | 15 | 2 | 49.878 | P | 0.200 | 0.036  |
| L05A | 2006 | 275 | 15 | 2 | 50.687 | P | 0.200 | 0.757  |
| O06A | 2006 | 275 | 15 | 2 | 51.107 | P | 0.200 | -0.124 |
| M06C | 2006 | 275 | 15 | 2 | 51.565 | P | 0.200 | 0.610  |
| SNE9 | 2006 | 275 | 15 | 2 | 52.764 | P | 0.200 | -0.554 |
| SNF9 | 2006 | 275 | 15 | 2 | 53.152 | P | 0.200 | -0.655 |
| S08C | 2006 | 275 | 15 | 2 | 52.200 | P | 0.200 | -0.187 |
| SNA8 | 2006 | 275 | 15 | 2 | 53.292 | P | 0.200 | -0.506 |
| HEC  | 2006 | 275 | 15 | 2 | 52.520 | P | 0.200 | 0.632  |
| GSC  | 2006 | 275 | 15 | 2 | 53.393 | P | 0.200 | 0.854  |
| WCN  | 2006 | 275 | 15 | 2 | 53.592 | P | 0.200 | -0.205 |
| M05C | 2006 | 275 | 15 | 2 | 53.725 | P | 0.200 | 0.428  |
| SLA  | 2006 | 275 | 15 | 2 | 53.771 | P | 0.200 | 0.854  |
| TIN  | 2006 | 275 | 15 | 2 | 54.045 | P | 0.200 | 0.329  |
| SNA7 | 2006 | 275 | 15 | 2 | 55.209 | P | 0.200 | -0.103 |
| MPM  | 2006 | 275 | 15 | 2 | 54.249 | P | 0.200 | 0.635  |
| BEK  | 2006 | 275 | 15 | 2 | 54.299 | P | 0.200 | -0.331 |
| M04C | 2006 | 275 | 15 | 2 | 54.987 | P | 0.200 | -0.124 |
| SND7 | 2006 | 275 | 15 | 2 | 56.094 | P | 0.200 | -0.273 |
| SNE7 | 2006 | 275 | 15 | 2 | 56.190 | P | 0.200 | -0.157 |
| CWC  | 2006 | 275 | 15 | 2 | 55.420 | P | 0.200 | 0.480  |
| SN55 | 2006 | 275 | 15 | 2 | 56.604 | P | 0.200 | 0.289  |
| SN97 | 2006 | 275 | 15 | 2 | 56.281 | P | 0.200 | 0.817  |
| O04C | 2006 | 275 | 15 | 2 | 56.313 | P | 0.200 | -0.097 |
| O05C | 2006 | 275 | 15 | 2 | 56.640 | P | 0.200 | -0.017 |
| SNE6 | 2006 | 275 | 15 | 2 | 57.775 | P | 0.200 | -0.071 |
| SNF6 | 2006 | 275 | 15 | 2 | 57.960 | P | 0.200 | -0.372 |
| YBH  | 2006 | 275 | 15 | 2 | 57.071 | P | 0.200 | -1.769 |
| SNC7 | 2006 | 275 | 15 | 2 | 57.231 | P | 0.200 | 0.610  |
| M03C | 2006 | 275 | 15 | 2 | 57.253 | P | 0.200 | -0.470 |
| P05C | 2006 | 275 | 15 | 2 | 57.379 | P | 0.200 | -0.110 |
| SNB5 | 2006 | 275 | 15 | 2 | 58.509 | P | 0.200 | -0.115 |
| SNC5 | 2006 | 275 | 15 | 2 | 58.569 | P | 0.200 | -0.275 |
| SND5 | 2006 | 275 | 15 | 2 | 58.628 | P | 0.200 | -0.478 |
| SN43 | 2006 | 275 | 15 | 2 | 58.934 | P | 0.200 | 0.422  |
| SNE5 | 2006 | 275 | 15 | 2 | 58.945 | P | 0.200 | -0.517 |
| SNG5 | 2006 | 275 | 15 | 2 | 59.229 | P | 0.200 | -0.809 |
| SNC4 | 2006 | 275 | 15 | 2 | 59.486 | P | 0.200 | -0.679 |
| HELL | 2006 | 275 | 15 | 2 | 58.546 | P | 0.200 | 0.142  |



|      |      |     |    |   |        |   |       |        |
|------|------|-----|----|---|--------|---|-------|--------|
| SNA4 | 2006 | 275 | 15 | 2 | 59.548 | P | 0.200 | -0.012 |
| S06C | 2006 | 275 | 15 | 2 | 59.047 | P | 0.200 | 0.655  |
| SNE4 | 2006 | 275 | 15 | 3 | 0.053  | P | 0.200 | -0.567 |
| LAVA | 2006 | 275 | 15 | 2 | 59.106 | P | 0.200 | -0.591 |
| M02C | 2006 | 275 | 15 | 2 | 59.229 | P | 0.200 | -1.284 |
| SNA3 | 2006 | 275 | 15 | 3 | 0.634  | P | 0.200 | -0.001 |
| ORV  | 2006 | 275 | 15 | 2 | 59.726 | P | 0.200 | -0.640 |
| ISA  | 2006 | 275 | 15 | 2 | 59.792 | P | 0.200 | 0.640  |
| SND4 | 2006 | 275 | 15 | 2 | 59.805 | P | 0.200 | -0.664 |
| SNB3 | 2006 | 275 | 15 | 3 | 1.008  | P | 0.200 | -0.123 |
| CMB  | 2006 | 275 | 15 | 3 | 0.300  | P | 0.200 | -0.010 |
| SN93 | 2006 | 275 | 15 | 3 | 0.942  | P | 0.200 | 0.145  |
| SNC3 | 2006 | 275 | 15 | 3 | 1.362  | P | 0.200 | -0.314 |
| CHF  | 2006 | 275 | 15 | 3 | 1.421  | P | 0.200 | 0.129  |
| VCS  | 2006 | 275 | 15 | 3 | 1.570  | P | 0.200 | 0.274  |
| S04C | 2006 | 275 | 15 | 3 | 6.341  | P | 0.200 | 0.352  |
| U04C | 2006 | 275 | 15 | 3 | 7.797  | P | 0.200 | 0.561  |
| PACP | 2006 | 275 | 15 | 3 | 8.278  | P | 0.200 | 0.875  |
| P01C | 2006 | 275 | 15 | 3 | 8.389  | P | 0.200 | -0.103 |
| CVS  | 2006 | 275 | 15 | 3 | 8.540  | P | 0.200 | 0.362  |
| MHC  | 2006 | 275 | 15 | 3 | 8.679  | P | 0.200 | 0.703  |
| HAST | 2006 | 275 | 15 | 3 | 10.743 | P | 0.200 | 0.095  |

|      |      |     |    |        |          |           |         |        |        |
|------|------|-----|----|--------|----------|-----------|---------|--------|--------|
| 2006 | 169  | 18  | 28 | 2.6298 | 33.02800 | -39.70200 | 10.0000 | 140    | -0.015 |
| Q11A | 2006 | 169 | 18 | 38     | 10.210   | P         | 0.200   | -0.103 |        |
| O09A | 2006 | 169 | 18 | 38     | 14.824   | P         | 0.200   | -0.065 |        |
| P09A | 2006 | 169 | 18 | 38     | 16.136   | P         | 0.200   | -0.035 |        |
| V11A | 2006 | 169 | 18 | 38     | 17.133   | P         | 0.200   | 0.573  |        |
| N08A | 2006 | 169 | 18 | 38     | 17.830   | P         | 0.200   | -0.290 |        |
| Q09A | 2006 | 169 | 18 | 38     | 18.161   | P         | 0.200   | 0.066  |        |
| TPNV | 2006 | 169 | 18 | 38     | 18.698   | P         | 0.200   | 0.687  |        |
| R09A | 2006 | 169 | 18 | 38     | 18.706   | P         | 0.200   | -0.213 |        |
| O08A | 2006 | 169 | 18 | 38     | 19.093   | P         | 0.200   | -0.341 |        |
| S09A | 2006 | 169 | 18 | 38     | 20.530   | P         | 0.200   | -0.466 |        |
| TUQ  | 2006 | 169 | 18 | 38     | 20.977   | P         | 0.200   | 0.940  |        |
| Q08A | 2006 | 169 | 18 | 38     | 21.043   | P         | 0.200   | -0.605 |        |
| M07A | 2006 | 169 | 18 | 38     | 21.317   | P         | 0.200   | -0.206 |        |
| SHO  | 2006 | 169 | 18 | 38     | 21.449   | P         | 0.200   | 0.946  |        |
| N07B | 2006 | 169 | 18 | 38     | 21.608   | P         | 0.200   | -0.516 |        |
| O07A | 2006 | 169 | 18 | 38     | 22.539   | P         | 0.200   | -0.467 |        |
| MNV  | 2006 | 169 | 18 | 38     | 23.128   | P         | 0.200   | -0.753 |        |
| FUR  | 2006 | 169 | 18 | 38     | 23.147   | P         | 0.200   | 1.084  |        |
| R08A | 2006 | 169 | 18 | 38     | 23.205   | P         | 0.200   | -0.521 |        |
| GRA  | 2006 | 169 | 18 | 38     | 23.645   | P         | 0.200   | 0.324  |        |
| P07A | 2006 | 169 | 18 | 38     | 24.203   | P         | 0.200   | -0.449 |        |
| HEC  | 2006 | 169 | 18 | 38     | 24.377   | P         | 0.200   | 0.671  |        |
| SN28 | 2006 | 169 | 18 | 38     | 24.925   | P         | 0.200   | -0.248 |        |
| SN38 | 2006 | 169 | 18 | 38     | 25.402   | P         | 0.200   | -0.407 |        |
| GSC  | 2006 | 169 | 18 | 38     | 25.711   | P         | 0.200   | 0.900  |        |
| SN48 | 2006 | 169 | 18 | 38     | 26.167   | P         | 0.200   | -0.310 |        |
| S08C | 2006 | 169 | 18 | 38     | 26.434   | P         | 0.200   | -0.062 |        |
| O06A | 2006 | 169 | 18 | 38     | 27.129   | P         | 0.200   | -0.442 |        |
| SN37 | 2006 | 169 | 18 | 38     | 27.183   | P         | 0.200   | -0.103 |        |
| SN16 | 2006 | 169 | 18 | 38     | 27.324   | P         | 0.200   | 0.321  |        |
| MPM  | 2006 | 169 | 18 | 38     | 27.577   | P         | 0.200   | 0.979  |        |
| SN26 | 2006 | 169 | 18 | 38     | 27.661   | P         | 0.200   | 0.039  |        |
| SN47 | 2006 | 169 | 18 | 38     | 27.725   | P         | 0.200   | -0.152 |        |
| RRX  | 2006 | 169 | 18 | 38     | 27.777   | P         | 0.200   | 0.909  |        |
| SN36 | 2006 | 169 | 18 | 38     | 28.164   | P         | 0.200   | -0.083 |        |
| TIN  | 2006 | 169 | 18 | 38     | 28.194   | P         | 0.200   | 0.618  |        |
| M06C | 2006 | 169 | 18 | 38     | 28.421   | P         | 0.200   | 0.248  |        |
| P06A | 2006 | 169 | 18 | 38     | 28.610   | P         | 0.200   | -0.517 |        |
| SN57 | 2006 | 169 | 18 | 38     | 28.776   | P         | 0.200   | 0.159  |        |

|      |      |     |    |    |        |   |       |        |
|------|------|-----|----|----|--------|---|-------|--------|
| WCN  | 2006 | 169 | 18 | 38 | 28.962 | P | 0.200 | -0.582 |
| SN67 | 2006 | 169 | 18 | 38 | 29.160 | P | 0.200 | -0.021 |
| CWC  | 2006 | 169 | 18 | 38 | 29.208 | P | 0.200 | 0.828  |
| R07C | 2006 | 169 | 18 | 38 | 29.303 | P | 0.200 | 0.157  |
| SN15 | 2006 | 169 | 18 | 38 | 29.401 | P | 0.200 | 0.348  |
| SN46 | 2006 | 169 | 18 | 38 | 29.412 | P | 0.200 | 0.202  |
| SN25 | 2006 | 169 | 18 | 38 | 29.413 | P | 0.200 | 0.124  |
| LRL  | 2006 | 169 | 18 | 38 | 29.577 | P | 0.200 | 0.645  |
| BEK  | 2006 | 169 | 18 | 38 | 30.286 | P | 0.200 | -0.665 |
| SN66 | 2006 | 169 | 18 | 38 | 30.606 | P | 0.200 | 0.187  |
| K04A | 2006 | 169 | 18 | 38 | 30.621 | P | 0.200 | 0.085  |
| SN76 | 2006 | 169 | 18 | 38 | 30.636 | P | 0.200 | -0.045 |
| ELFS | 2006 | 169 | 18 | 38 | 30.927 | P | 0.200 | 0.097  |
| M05C | 2006 | 169 | 18 | 38 | 31.166 | P | 0.200 | 0.359  |
| SN44 | 2006 | 169 | 18 | 38 | 32.018 | P | 0.200 | 0.224  |
| L04A | 2006 | 169 | 18 | 38 | 32.316 | P | 0.200 | -0.038 |
| R05C | 2006 | 169 | 18 | 38 | 32.387 | P | 0.200 | -0.240 |
| BFS  | 2006 | 169 | 18 | 38 | 32.432 | P | 0.200 | 0.384  |
| EDW2 | 2006 | 169 | 18 | 38 | 32.691 | P | 0.200 | 0.764  |
| J03A | 2006 | 169 | 18 | 38 | 33.065 | P | 0.200 | -1.138 |
| SN64 | 2006 | 169 | 18 | 38 | 33.082 | P | 0.200 | 0.356  |
| O04C | 2006 | 169 | 18 | 38 | 33.094 | P | 0.200 | -0.191 |
| SN11 | 2006 | 169 | 18 | 38 | 33.123 | P | 0.200 | -0.534 |
| M04C | 2006 | 169 | 18 | 38 | 33.237 | P | 0.200 | 0.100  |
| SN21 | 2006 | 169 | 18 | 38 | 33.396 | P | 0.200 | -0.916 |
| ISA  | 2006 | 169 | 18 | 38 | 33.459 | P | 0.200 | 1.145  |
| HATC | 2006 | 169 | 18 | 38 | 33.768 | P | 0.200 | 0.157  |
| S06C | 2006 | 169 | 18 | 38 | 34.067 | P | 0.200 | 0.710  |
| CHF  | 2006 | 169 | 18 | 38 | 34.084 | P | 0.200 | 0.495  |
| RCT  | 2006 | 169 | 18 | 38 | 34.153 | P | 0.200 | -0.140 |
| SN84 | 2006 | 169 | 18 | 38 | 34.307 | P | 0.200 | 0.086  |
| MWC  | 2006 | 169 | 18 | 38 | 34.386 | P | 0.200 | 0.327  |
| T06C | 2006 | 169 | 18 | 38 | 34.421 | P | 0.200 | -0.309 |
| HUMO | 2006 | 169 | 18 | 38 | 34.500 | P | 0.200 | -1.443 |
| SN52 | 2006 | 169 | 18 | 38 | 34.725 | P | 0.200 | 0.259  |
| PAS  | 2006 | 169 | 18 | 38 | 34.751 | P | 0.200 | 0.012  |
| VES  | 2006 | 169 | 18 | 38 | 34.921 | P | 0.200 | 0.113  |
| LAVA | 2006 | 169 | 18 | 38 | 35.027 | P | 0.200 | -0.477 |
| M03C | 2006 | 169 | 18 | 38 | 35.140 | P | 0.200 | -0.406 |
| SN73 | 2006 | 169 | 18 | 38 | 35.234 | P | 0.200 | 0.394  |
| DEC  | 2006 | 169 | 18 | 38 | 35.289 | P | 0.200 | -0.011 |
| DBO  | 2006 | 169 | 18 | 38 | 35.532 | P | 0.200 | -0.591 |
| CMB  | 2006 | 169 | 18 | 38 | 35.569 | P | 0.200 | 0.017  |
| YBH  | 2006 | 169 | 18 | 38 | 35.647 | P | 0.200 | -1.516 |
| SN51 | 2006 | 169 | 18 | 38 | 36.134 | P | 0.200 | 0.237  |
| DJJ  | 2006 | 169 | 18 | 38 | 36.185 | P | 0.200 | -0.050 |
| J02A | 2006 | 169 | 18 | 38 | 36.302 | P | 0.200 | -0.613 |
| ORV  | 2006 | 169 | 18 | 38 | 36.404 | P | 0.200 | -0.538 |
| ARV  | 2006 | 169 | 18 | 38 | 36.721 | P | 0.200 | 1.354  |
| SN71 | 2006 | 169 | 18 | 38 | 36.805 | P | 0.200 | 0.171  |
| OSI  | 2006 | 169 | 18 | 38 | 36.885 | P | 0.200 | 0.731  |
| WDC  | 2006 | 169 | 18 | 38 | 36.955 | P | 0.200 | -2.179 |
| K02A | 2006 | 169 | 18 | 38 | 37.250 | P | 0.200 | -0.895 |
| O03C | 2006 | 169 | 18 | 38 | 37.270 | P | 0.200 | -1.078 |
| M02C | 2006 | 169 | 18 | 38 | 37.298 | P | 0.200 | -1.369 |
| S05C | 2006 | 169 | 18 | 38 | 37.357 | P | 0.200 | 0.488  |
| R04C | 2006 | 169 | 18 | 38 | 38.031 | P | 0.200 | 0.536  |
| SUTB | 2006 | 169 | 18 | 38 | 38.169 | P | 0.200 | -0.828 |
| Q04C | 2006 | 169 | 18 | 38 | 38.286 | P | 0.200 | 0.125  |
| V05C | 2006 | 169 | 18 | 38 | 38.369 | P | 0.200 | -0.344 |
| CIA  | 2006 | 169 | 18 | 38 | 38.498 | P | 0.200 | 0.678  |
| L02A | 2006 | 169 | 18 | 38 | 39.221 | P | 0.200 | -0.744 |
| O02C | 2006 | 169 | 18 | 38 | 39.614 | P | 0.200 | -1.779 |

|      |      |     |    |    |        |   |       |        |
|------|------|-----|----|----|--------|---|-------|--------|
| T05C | 2006 | 169 | 18 | 38 | 40.979 | P | 0.200 | 1.294  |
| GASB | 2006 | 169 | 18 | 38 | 41.013 | P | 0.200 | -1.550 |
| N02C | 2006 | 169 | 18 | 38 | 41.044 | P | 0.200 | -1.078 |
| PKD  | 2006 | 169 | 18 | 38 | 41.171 | P | 0.200 | -0.580 |
| S04C | 2006 | 169 | 18 | 38 | 41.831 | P | 0.200 | 0.500  |
| MPP  | 2006 | 169 | 18 | 38 | 42.203 | P | 0.200 | 1.151  |
| U04C | 2006 | 169 | 18 | 38 | 42.343 | P | 0.200 | 0.568  |
| Q03C | 2006 | 169 | 18 | 38 | 42.715 | P | 0.200 | 0.968  |
| PACP | 2006 | 169 | 18 | 38 | 43.479 | P | 0.200 | 1.004  |
| PHL  | 2006 | 169 | 18 | 38 | 43.706 | P | 0.200 | 0.627  |
| WENL | 2006 | 169 | 18 | 38 | 43.816 | P | 0.200 | 0.722  |
| MHC  | 2006 | 169 | 18 | 38 | 44.203 | P | 0.200 | 0.846  |
| HAST | 2006 | 169 | 18 | 38 | 45.666 | P | 0.200 | 0.197  |

|      |      |    |    |         |          |           |         |        |       |
|------|------|----|----|---------|----------|-----------|---------|--------|-------|
| 2007 | 35   | 3  | 33 | 18.5936 | 35.34400 | -35.94400 | 10.0000 | 306    | 0.007 |
| P10A | 2007 | 35 | 3  | 43      | 39.240   | P         | 0.200   | 0.373  |       |
| O09A | 2007 | 35 | 3  | 43      | 40.849   | P         | 0.200   | 0.029  |       |
| P09A | 2007 | 35 | 3  | 43      | 42.272   | P         | 0.200   | -0.082 |       |
| N08A | 2007 | 35 | 3  | 43      | 43.455   | P         | 0.200   | -0.136 |       |
| S10A | 2007 | 35 | 3  | 43      | 43.947   | P         | 0.200   | -0.287 |       |
| Q09A | 2007 | 35 | 3  | 43      | 44.423   | P         | 0.200   | -0.123 |       |
| O08A | 2007 | 35 | 3  | 43      | 44.863   | P         | 0.200   | -0.235 |       |
| V11A | 2007 | 35 | 3  | 43      | 45.001   | P         | 0.200   | 0.450  |       |
| R09A | 2007 | 35 | 3  | 43      | 45.325   | P         | 0.200   | -0.287 |       |
| L07A | 2007 | 35 | 3  | 43      | 46.503   | P         | 0.200   | 0.802  |       |
| TPH  | 2007 | 35 | 3  | 43      | 46.506   | P         | 0.200   | -0.389 |       |
| M07A | 2007 | 35 | 3  | 43      | 46.629   | P         | 0.200   | 0.106  |       |
| N07B | 2007 | 35 | 3  | 43      | 47.058   | P         | 0.200   | -0.354 |       |
| Q08A | 2007 | 35 | 3  | 43      | 47.277   | P         | 0.200   | -0.637 |       |
| S09A | 2007 | 35 | 3  | 43      | 47.312   | P         | 0.200   | -0.536 |       |
| U10A | 2007 | 35 | 3  | 43      | 48.154   | P         | 0.200   | 1.056  |       |
| O07A | 2007 | 35 | 3  | 43      | 48.156   | P         | 0.200   | -0.401 |       |
| TUQ  | 2007 | 35 | 3  | 43      | 48.921   | P         | 0.200   | 0.882  |       |
| SHO  | 2007 | 35 | 3  | 43      | 49.038   | P         | 0.200   | 0.781  |       |
| R08A | 2007 | 35 | 3  | 43      | 49.447   | P         | 0.200   | -0.717 |       |
| P07A | 2007 | 35 | 3  | 43      | 50.111   | P         | 0.200   | -0.336 |       |
| FUR  | 2007 | 35 | 3  | 43      | 50.186   | P         | 0.200   | 0.710  |       |
| GRA  | 2007 | 35 | 3  | 43      | 50.418   | P         | 0.200   | -0.006 |       |
| Q07A | 2007 | 35 | 3  | 43      | 50.690   | P         | 0.200   | -1.108 |       |
| K05A | 2007 | 35 | 3  | 43      | 51.130   | P         | 0.200   | 0.489  |       |
| N06A | 2007 | 35 | 3  | 43      | 51.226   | P         | 0.200   | -0.104 |       |
| J05A | 2007 | 35 | 3  | 43      | 51.383   | P         | 0.200   | 0.853  |       |
| HEC  | 2007 | 35 | 3  | 43      | 52.486   | P         | 0.200   | 0.641  |       |
| O06A | 2007 | 35 | 3  | 43      | 52.641   | P         | 0.200   | -0.276 |       |
| S08C | 2007 | 35 | 3  | 43      | 52.881   | P         | 0.200   | -0.340 |       |
| L05A | 2007 | 35 | 3  | 43      | 53.010   | P         | 0.200   | 0.818  |       |
| GSC  | 2007 | 35 | 3  | 43      | 53.486   | P         | 0.200   | 0.813  |       |
| M06C | 2007 | 35 | 3  | 43      | 53.537   | P         | 0.200   | 0.562  |       |
| SNB9 | 2007 | 35 | 3  | 43      | 53.802   | P         | 0.200   | -0.488 |       |
| SLA  | 2007 | 35 | 3  | 43      | 54.216   | P         | 0.200   | 0.961  |       |
| SNA8 | 2007 | 35 | 3  | 43      | 54.453   | P         | 0.200   | -0.749 |       |
| J04A | 2007 | 35 | 3  | 43      | 54.507   | P         | 0.200   | -0.044 |       |
| K04A | 2007 | 35 | 3  | 43      | 54.572   | P         | 0.200   | 0.022  |       |
| MPM  | 2007 | 35 | 3  | 43      | 54.664   | P         | 0.200   | 0.641  |       |
| TIN  | 2007 | 35 | 3  | 43      | 54.792   | P         | 0.200   | 0.329  |       |
| WCN  | 2007 | 35 | 3  | 43      | 54.822   | P         | 0.200   | -0.438 |       |
| SNE9 | 2007 | 35 | 3  | 43      | 54.823   | P         | 0.200   | -0.197 |       |
| SNF9 | 2007 | 35 | 3  | 43      | 55.078   | P         | 0.200   | -0.489 |       |
| R07C | 2007 | 35 | 3  | 43      | 55.479   | P         | 0.200   | 0.011  |       |
| RRX  | 2007 | 35 | 3  | 43      | 55.555   | P         | 0.200   | 0.723  |       |
| SNC8 | 2007 | 35 | 3  | 43      | 55.683   | P         | 0.200   | -0.368 |       |
| BEK  | 2007 | 35 | 3  | 43      | 55.849   | P         | 0.200   | -0.467 |       |
| M05C | 2007 | 35 | 3  | 43      | 55.884   | P         | 0.200   | 0.447  |       |

|      |      |    |   |    |        |   |       |        |
|------|------|----|---|----|--------|---|-------|--------|
| MLAC | 2007 | 35 | 3 | 43 | 55.920 | P | 0.200 | 0.078  |
| SND8 | 2007 | 35 | 3 | 43 | 55.961 | P | 0.200 | -0.411 |
| CWC  | 2007 | 35 | 3 | 43 | 55.965 | P | 0.200 | 0.438  |
| SN97 | 2007 | 35 | 3 | 43 | 56.111 | P | 0.200 | -0.721 |
| ELFS | 2007 | 35 | 3 | 43 | 56.122 | P | 0.200 | 0.286  |
| SNA7 | 2007 | 35 | 3 | 43 | 56.247 | P | 0.200 | -0.485 |
| L04A | 2007 | 35 | 3 | 43 | 56.360 | P | 0.200 | -0.151 |
| SNF8 | 2007 | 35 | 3 | 43 | 56.913 | P | 0.200 | -0.265 |
| SN14 | 2007 | 35 | 3 | 43 | 57.050 | P | 0.200 | -0.040 |
| BBR  | 2007 | 35 | 3 | 43 | 57.391 | P | 0.200 | 0.884  |
| M04C | 2007 | 35 | 3 | 43 | 57.497 | P | 0.200 | 0.039  |
| SN86 | 2007 | 35 | 3 | 43 | 57.577 | P | 0.200 | -0.330 |
| SND7 | 2007 | 35 | 3 | 43 | 57.626 | P | 0.200 | -0.409 |
| SN34 | 2007 | 35 | 3 | 43 | 57.769 | P | 0.200 | 0.194  |
| SNC7 | 2007 | 35 | 3 | 43 | 57.814 | P | 0.200 | -0.377 |
| O04C | 2007 | 35 | 3 | 43 | 58.128 | P | 0.200 | -0.192 |
| SN65 | 2007 | 35 | 3 | 43 | 58.230 | P | 0.200 | 0.299  |
| SVD  | 2007 | 35 | 3 | 43 | 58.358 | P | 0.200 | 0.824  |
| O05C | 2007 | 35 | 3 | 43 | 58.449 | P | 0.200 | -0.004 |
| SN75 | 2007 | 35 | 3 | 43 | 58.527 | P | 0.200 | 0.143  |
| HATC | 2007 | 35 | 3 | 43 | 58.532 | P | 0.200 | 0.155  |
| SN96 | 2007 | 35 | 3 | 43 | 58.707 | P | 0.200 | -0.184 |
| SN12 | 2007 | 35 | 3 | 43 | 58.802 | P | 0.200 | 0.164  |
| SN85 | 2007 | 35 | 3 | 43 | 59.051 | P | 0.200 | -0.070 |
| SN64 | 2007 | 35 | 3 | 43 | 59.204 | P | 0.200 | 0.209  |
| SNG7 | 2007 | 35 | 3 | 43 | 59.218 | P | 0.200 | -0.072 |
| HELL | 2007 | 35 | 3 | 43 | 59.350 | P | 0.200 | 0.149  |
| SNE6 | 2007 | 35 | 3 | 43 | 59.367 | P | 0.200 | -0.159 |
| M03C | 2007 | 35 | 3 | 43 | 59.590 | P | 0.200 | -0.405 |
| YBH  | 2007 | 35 | 3 | 43 | 59.600 | P | 0.200 | -1.706 |
| SNF6 | 2007 | 35 | 3 | 43 | 59.635 | P | 0.200 | -0.458 |
| SN43 | 2007 | 35 | 3 | 43 | 59.765 | P | 0.200 | 0.227  |
| SNB5 | 2007 | 35 | 3 | 43 | 59.864 | P | 0.200 | -0.243 |
| SNC5 | 2007 | 35 | 3 | 44 | 0.048  | P | 0.200 | -0.358 |
| SND5 | 2007 | 35 | 3 | 44 | 0.072  | P | 0.200 | -0.666 |
| S06C | 2007 | 35 | 3 | 44 | 0.137  | P | 0.200 | 0.564  |
| EDW2 | 2007 | 35 | 3 | 44 | 0.168  | P | 0.200 | 0.523  |
| BFS  | 2007 | 35 | 3 | 44 | 0.213  | P | 0.200 | 0.141  |
| SN84 | 2007 | 35 | 3 | 44 | 0.358  | P | 0.200 | 0.089  |
| SN63 | 2007 | 35 | 3 | 44 | 0.404  | P | 0.200 | 0.355  |
| SN95 | 2007 | 35 | 3 | 44 | 0.431  | P | 0.200 | 0.184  |
| ISA  | 2007 | 35 | 3 | 44 | 0.447  | P | 0.200 | 0.801  |
| LAVA | 2007 | 35 | 3 | 44 | 0.575  | P | 0.200 | -0.626 |
| SNE5 | 2007 | 35 | 3 | 44 | 0.616  | P | 0.200 | -0.551 |
| RCT  | 2007 | 35 | 3 | 44 | 0.679  | P | 0.200 | -0.541 |
| T06C | 2007 | 35 | 3 | 44 | 0.838  | P | 0.200 | -0.449 |
| SNA4 | 2007 | 35 | 3 | 44 | 0.880  | P | 0.200 | -0.091 |
| SNC4 | 2007 | 35 | 3 | 44 | 0.908  | P | 0.200 | -0.828 |
| SND4 | 2007 | 35 | 3 | 44 | 1.302  | P | 0.200 | -0.801 |
| SNG5 | 2007 | 35 | 3 | 44 | 1.330  | P | 0.200 | -0.536 |
| CMB  | 2007 | 35 | 3 | 44 | 1.460  | P | 0.200 | -0.135 |
| M02C | 2007 | 35 | 3 | 44 | 1.552  | P | 0.200 | -1.368 |
| ORV  | 2007 | 35 | 3 | 44 | 1.587  | P | 0.200 | -0.582 |
| SNE4 | 2007 | 35 | 3 | 44 | 1.721  | P | 0.200 | -0.597 |
| WDC  | 2007 | 35 | 3 | 44 | 1.732  | P | 0.200 | -2.030 |
| VCS  | 2007 | 35 | 3 | 44 | 1.783  | P | 0.200 | 0.287  |
| CHF  | 2007 | 35 | 3 | 44 | 1.890  | P | 0.200 | 0.425  |
| SNA3 | 2007 | 35 | 3 | 44 | 1.969  | P | 0.200 | -0.078 |
| SN93 | 2007 | 35 | 3 | 44 | 2.062  | P | 0.200 | -0.105 |
| MWC  | 2007 | 35 | 3 | 44 | 2.120  | P | 0.200 | 0.146  |
| O03C | 2007 | 35 | 3 | 44 | 2.223  | P | 0.200 | -1.081 |
| SNB3 | 2007 | 35 | 3 | 44 | 2.476  | P | 0.200 | -0.162 |
| SNC3 | 2007 | 35 | 3 | 44 | 2.993  | P | 0.200 | -0.243 |

|      |      |    |   |    |        |   |       |        |
|------|------|----|---|----|--------|---|-------|--------|
| SUTB | 2007 | 35 | 3 | 44 | 3.160  | P | 0.200 | -1.123 |
| S05C | 2007 | 35 | 3 | 44 | 3.359  | P | 0.200 | 0.202  |
| R04C | 2007 | 35 | 3 | 44 | 3.716  | P | 0.200 | 0.409  |
| ARV  | 2007 | 35 | 3 | 44 | 3.757  | P | 0.200 | 0.982  |
| Q04C | 2007 | 35 | 3 | 44 | 3.811  | P | 0.200 | 0.126  |
| U05C | 2007 | 35 | 3 | 44 | 5.064  | P | 0.200 | -0.144 |
| S04C | 2007 | 35 | 3 | 44 | 7.596  | P | 0.200 | 0.252  |
| Q03C | 2007 | 35 | 3 | 44 | 8.122  | P | 0.200 | 0.908  |
| U04C | 2007 | 35 | 3 | 44 | 8.633  | P | 0.200 | 0.342  |
| MNRC | 2007 | 35 | 3 | 44 | 8.710  | P | 0.200 | 0.272  |
| MPP  | 2007 | 35 | 3 | 44 | 9.177  | P | 0.200 | 0.879  |
| PACP | 2007 | 35 | 3 | 44 | 9.427  | P | 0.200 | 0.768  |
| WENL | 2007 | 35 | 3 | 44 | 9.491  | P | 0.200 | 0.531  |
| JCC  | 2007 | 35 | 3 | 44 | 9.764  | P | 0.200 | 0.268  |
| MHC  | 2007 | 35 | 3 | 44 | 9.852  | P | 0.200 | 0.500  |
| CVS  | 2007 | 35 | 3 | 44 | 10.150 | P | 0.200 | 0.262  |
| SAO  | 2007 | 35 | 3 | 44 | 10.377 | P | 0.200 | 0.343  |
| BRIB | 2007 | 35 | 3 | 44 | 10.438 | P | 0.200 | 0.620  |
| P01C | 2007 | 35 | 3 | 44 | 10.470 | P | 0.200 | -0.100 |
| BRK  | 2007 | 35 | 3 | 44 | 10.661 | P | 0.200 | 0.197  |
| O01C | 2007 | 35 | 3 | 44 | 11.147 | P | 0.200 | 0.494  |
| HOPS | 2007 | 35 | 3 | 44 | 11.507 | P | 0.200 | 0.673  |
| V03C | 2007 | 35 | 3 | 44 | 11.618 | P | 0.200 | 0.236  |
| HAST | 2007 | 35 | 3 | 44 | 11.764 | P | 0.200 | -0.054 |
| JRSC | 2007 | 35 | 3 | 44 | 11.952 | P | 0.200 | 0.158  |

|      |     |    |   |         |          |           |         |     |        |
|------|-----|----|---|---------|----------|-----------|---------|-----|--------|
| 2007 | 114 | 16 | 7 | 41.5905 | 28.98500 | -43.20800 | 10.0000 | 326 | -0.012 |
|------|-----|----|---|---------|----------|-----------|---------|-----|--------|

|      |      |     |    |    |        |   |       |        |
|------|------|-----|----|----|--------|---|-------|--------|
| Q11A | 2007 | 114 | 16 | 17 | 45.059 | P | 0.200 | 0.052  |
| R11A | 2007 | 114 | 16 | 17 | 45.552 | P | 0.200 | -0.009 |
| T11A | 2007 | 114 | 16 | 17 | 46.171 | P | 0.200 | 0.590  |
| P10A | 2007 | 114 | 16 | 17 | 48.191 | P | 0.200 | 0.286  |
| U11A | 2007 | 114 | 16 | 17 | 48.625 | P | 0.200 | 0.785  |
| Q10A | 2007 | 114 | 16 | 17 | 49.176 | P | 0.200 | 0.104  |
| V11A | 2007 | 114 | 16 | 17 | 49.514 | P | 0.200 | 0.205  |
| R10A | 2007 | 114 | 16 | 17 | 49.858 | P | 0.200 | 0.429  |
| O09A | 2007 | 114 | 16 | 17 | 50.571 | P | 0.200 | -0.162 |
| S10A | 2007 | 114 | 16 | 17 | 51.637 | P | 0.200 | 0.018  |
| P09A | 2007 | 114 | 16 | 17 | 51.673 | P | 0.200 | 0.057  |
| TPNV | 2007 | 114 | 16 | 17 | 52.303 | P | 0.200 | 0.669  |
| TUQ  | 2007 | 114 | 16 | 17 | 53.021 | P | 0.200 | 0.357  |
| Q09A | 2007 | 114 | 16 | 17 | 53.097 | P | 0.200 | 0.017  |
| R09A | 2007 | 114 | 16 | 17 | 53.244 | P | 0.200 | -0.280 |
| N08A | 2007 | 114 | 16 | 17 | 54.037 | P | 0.200 | -0.482 |
| SHO  | 2007 | 114 | 16 | 17 | 54.108 | P | 0.200 | 0.611  |
| S09A | 2007 | 114 | 16 | 17 | 54.975 | P | 0.200 | -0.348 |
| O08A | 2007 | 114 | 16 | 17 | 55.039 | P | 0.200 | -0.491 |
| Q08A | 2007 | 114 | 16 | 17 | 56.291 | P | 0.200 | -0.522 |
| HEC  | 2007 | 114 | 16 | 17 | 56.348 | P | 0.200 | 0.276  |
| FUR  | 2007 | 114 | 16 | 17 | 56.486 | P | 0.200 | 0.956  |
| P08A | 2007 | 114 | 16 | 17 | 56.855 | P | 0.200 | 0.912  |
| GRA  | 2007 | 114 | 16 | 17 | 57.619 | P | 0.200 | 0.389  |
| M07A | 2007 | 114 | 16 | 17 | 57.840 | P | 0.200 | -0.670 |
| N07B | 2007 | 114 | 16 | 17 | 57.910 | P | 0.200 | -0.768 |
| GSC  | 2007 | 114 | 16 | 17 | 57.928 | P | 0.200 | 0.372  |
| R08A | 2007 | 114 | 16 | 17 | 58.168 | P | 0.200 | -0.440 |
| L07A | 2007 | 114 | 16 | 17 | 58.488 | P | 0.200 | 0.091  |
| P07A | 2007 | 114 | 16 | 17 | 59.909 | P | 0.200 | -0.508 |
| Q07A | 2007 | 114 | 16 | 18 | 0.348  | P | 0.200 | -0.779 |
| MPM  | 2007 | 114 | 16 | 18 | 0.506  | P | 0.200 | 0.559  |
| S08C | 2007 | 114 | 16 | 18 | 0.986  | P | 0.200 | 0.113  |
| BBR  | 2007 | 114 | 16 | 18 | 1.005  | P | 0.200 | 0.510  |
| SVD  | 2007 | 114 | 16 | 18 | 1.916  | P | 0.200 | 0.465  |
| LRL  | 2007 | 114 | 16 | 18 | 2.102  | P | 0.200 | 0.108  |

|      |      |     |    |    |        |   |       |        |
|------|------|-----|----|----|--------|---|-------|--------|
| N06A | 2007 | 114 | 16 | 18 | 2.128  | P | 0.200 | -0.792 |
| VTV  | 2007 | 114 | 16 | 18 | 2.277  | P | 0.200 | 0.389  |
| TIN  | 2007 | 114 | 16 | 18 | 2.338  | P | 0.200 | 0.645  |
| CWC  | 2007 | 114 | 16 | 18 | 2.797  | P | 0.200 | 0.695  |
| O06A | 2007 | 114 | 16 | 18 | 3.397  | P | 0.200 | -0.516 |
| SNB9 | 2007 | 114 | 16 | 18 | 3.854  | P | 0.200 | -0.501 |
| SNA8 | 2007 | 114 | 16 | 18 | 4.198  | P | 0.200 | -0.814 |
| R07C | 2007 | 114 | 16 | 18 | 4.295  | P | 0.200 | 0.230  |
| BFS  | 2007 | 114 | 16 | 18 | 4.321  | P | 0.200 | -0.060 |
| K05A | 2007 | 114 | 16 | 18 | 4.611  | P | 0.200 | -0.012 |
| EDW2 | 2007 | 114 | 16 | 18 | 4.985  | P | 0.200 | 0.269  |
| M06C | 2007 | 114 | 16 | 18 | 5.050  | P | 0.200 | -0.223 |
| SND9 | 2007 | 114 | 16 | 18 | 5.070  | P | 0.200 | -0.428 |
| SN14 | 2007 | 114 | 16 | 18 | 5.072  | P | 0.200 | 0.435  |
| R06C | 2007 | 114 | 16 | 18 | 5.217  | P | 0.200 | -0.063 |
| J05A | 2007 | 114 | 16 | 18 | 5.264  | P | 0.200 | 0.046  |
| SNE9 | 2007 | 114 | 16 | 18 | 5.481  | P | 0.200 | -0.520 |
| SNC8 | 2007 | 114 | 16 | 18 | 5.781  | P | 0.200 | -0.644 |
| L05A | 2007 | 114 | 16 | 18 | 5.917  | P | 0.200 | 0.450  |
| SNF9 | 2007 | 114 | 16 | 18 | 5.926  | P | 0.200 | -0.844 |
| SN97 | 2007 | 114 | 16 | 18 | 6.007  | P | 0.200 | -0.442 |
| SNA7 | 2007 | 114 | 16 | 18 | 6.026  | P | 0.200 | -0.547 |
| SN34 | 2007 | 114 | 16 | 18 | 6.062  | P | 0.200 | 0.562  |
| VCS  | 2007 | 114 | 16 | 18 | 6.193  | P | 0.200 | -0.068 |
| CHF  | 2007 | 114 | 16 | 18 | 6.216  | P | 0.200 | 0.122  |
| SN55 | 2007 | 114 | 16 | 18 | 6.293  | P | 0.200 | 0.360  |
| SND8 | 2007 | 114 | 16 | 18 | 6.310  | P | 0.200 | -0.666 |
| MWC  | 2007 | 114 | 16 | 18 | 6.362  | P | 0.200 | -0.129 |
| BEK  | 2007 | 114 | 16 | 18 | 6.418  | P | 0.200 | -0.782 |
| SN12 | 2007 | 114 | 16 | 18 | 6.475  | P | 0.200 | 0.365  |
| HELL | 2007 | 114 | 16 | 18 | 6.793  | P | 0.200 | 0.334  |
| ELFS | 2007 | 114 | 16 | 18 | 7.337  | P | 0.200 | -0.264 |
| DEC  | 2007 | 114 | 16 | 18 | 7.500  | P | 0.200 | -0.301 |
| SNF8 | 2007 | 114 | 16 | 18 | 7.588  | P | 0.200 | -0.728 |
| R05C | 2007 | 114 | 16 | 18 | 7.807  | P | 0.200 | -0.303 |
| SN75 | 2007 | 114 | 16 | 18 | 7.809  | P | 0.200 | 0.516  |
| SN64 | 2007 | 114 | 16 | 18 | 8.061  | P | 0.200 | 0.426  |
| SN43 | 2007 | 114 | 16 | 18 | 8.116  | P | 0.200 | 0.448  |
| DJJ  | 2007 | 114 | 16 | 18 | 8.140  | P | 0.200 | -0.528 |
| M05C | 2007 | 114 | 16 | 18 | 8.205  | P | 0.200 | 0.100  |
| K04A | 2007 | 114 | 16 | 18 | 8.332  | P | 0.200 | -0.370 |
| SN96 | 2007 | 114 | 16 | 18 | 8.425  | P | 0.200 | 0.144  |
| SNE7 | 2007 | 114 | 16 | 18 | 8.431  | P | 0.200 | -0.588 |
| SN85 | 2007 | 114 | 16 | 18 | 8.549  | P | 0.200 | 0.266  |
| I04A | 2007 | 114 | 16 | 18 | 8.569  | P | 0.200 | -1.153 |
| T06C | 2007 | 114 | 16 | 18 | 8.602  | P | 0.200 | -0.537 |
| SNC7 | 2007 | 114 | 16 | 18 | 8.849  | P | 0.200 | 0.319  |
| J04A | 2007 | 114 | 16 | 18 | 9.094  | P | 0.200 | -0.395 |
| SN63 | 2007 | 114 | 16 | 18 | 9.144  | P | 0.200 | 0.536  |
| OSI  | 2007 | 114 | 16 | 18 | 9.147  | P | 0.200 | 0.197  |
| SN74 | 2007 | 114 | 16 | 18 | 9.315  | P | 0.200 | 0.586  |
| ARV  | 2007 | 114 | 16 | 18 | 9.454  | P | 0.200 | 0.954  |
| SND7 | 2007 | 114 | 16 | 18 | 9.592  | P | 0.200 | 0.832  |
| SNC6 | 2007 | 114 | 16 | 18 | 9.812  | P | 0.200 | 0.550  |
| SN84 | 2007 | 114 | 16 | 18 | 9.862  | P | 0.200 | 0.470  |
| L04A | 2007 | 114 | 16 | 18 | 9.882  | P | 0.200 | -0.394 |
| SN95 | 2007 | 114 | 16 | 18 | 9.901  | P | 0.200 | 0.322  |
| SNA5 | 2007 | 114 | 16 | 18 | 9.920  | P | 0.200 | 0.515  |
| CIA  | 2007 | 114 | 16 | 18 | 10.142 | P | 0.200 | 0.285  |
| P05C | 2007 | 114 | 16 | 18 | 10.158 | P | 0.200 | 0.620  |
| SNC5 | 2007 | 114 | 16 | 18 | 10.353 | P | 0.200 | -0.278 |
| SNG7 | 2007 | 114 | 16 | 18 | 10.451 | P | 0.200 | -0.282 |
| HATC | 2007 | 114 | 16 | 18 | 10.478 | P | 0.200 | -0.156 |

|      |      |     |    |    |        |   |       |        |
|------|------|-----|----|----|--------|---|-------|--------|
| M04C | 2007 | 114 | 16 | 18 | 10.603 | P | 0.200 | -0.199 |
| SND5 | 2007 | 114 | 16 | 18 | 10.662 | P | 0.200 | -0.540 |
| SNF6 | 2007 | 114 | 16 | 18 | 10.666 | P | 0.200 | -0.421 |
| SNA4 | 2007 | 114 | 16 | 18 | 10.883 | P | 0.200 | 0.303  |
| CMB  | 2007 | 114 | 16 | 18 | 11.001 | P | 0.200 | 0.313  |
| O04C | 2007 | 114 | 16 | 18 | 11.036 | P | 0.200 | 1.098  |
| SNC4 | 2007 | 114 | 16 | 18 | 11.221 | P | 0.200 | -0.668 |
| SNE5 | 2007 | 114 | 16 | 18 | 11.385 | P | 0.200 | -0.519 |
| SN93 | 2007 | 114 | 16 | 18 | 11.660 | P | 0.200 | 0.146  |
| SNA3 | 2007 | 114 | 16 | 18 | 11.832 | P | 0.200 | 0.224  |
| SND4 | 2007 | 114 | 16 | 18 | 11.839 | P | 0.200 | -0.668 |
| S05C | 2007 | 114 | 16 | 18 | 12.220 | P | 0.200 | 0.614  |
| U05C | 2007 | 114 | 16 | 18 | 12.334 | P | 0.200 | -0.296 |
| HUMO | 2007 | 114 | 16 | 18 | 12.352 | P | 0.200 | -1.951 |
| SNE4 | 2007 | 114 | 16 | 18 | 12.373 | P | 0.200 | -0.603 |
| SNG5 | 2007 | 114 | 16 | 18 | 12.373 | P | 0.200 | -0.689 |
| M03C | 2007 | 114 | 16 | 18 | 12.394 | P | 0.200 | -0.564 |
| ORV  | 2007 | 114 | 16 | 18 | 12.660 | P | 0.200 | -0.546 |
| YBH  | 2007 | 114 | 16 | 18 | 12.978 | P | 0.200 | -1.977 |
| SNC3 | 2007 | 114 | 16 | 18 | 13.219 | P | 0.200 | -0.093 |
| R04C | 2007 | 114 | 16 | 18 | 13.605 | P | 0.200 | 0.704  |
| DBO  | 2007 | 114 | 16 | 18 | 13.691 | P | 0.200 | -1.152 |
| WDC  | 2007 | 114 | 16 | 18 | 13.765 | P | 0.200 | -2.441 |
| O03C | 2007 | 114 | 16 | 18 | 13.989 | P | 0.200 | -0.982 |
| SUTB | 2007 | 114 | 16 | 18 | 14.435 | P | 0.200 | -0.700 |
| M02C | 2007 | 114 | 16 | 18 | 14.598 | P | 0.200 | -1.678 |
| SCZ2 | 2007 | 114 | 16 | 18 | 15.027 | P | 0.200 | -0.039 |
| MPP  | 2007 | 114 | 16 | 18 | 15.229 | P | 0.200 | 0.945  |
| T05C | 2007 | 114 | 16 | 18 | 15.402 | P | 0.200 | 1.170  |
| SMM  | 2007 | 114 | 16 | 18 | 15.784 | P | 0.200 | 1.666  |
| O02C | 2007 | 114 | 16 | 18 | 16.229 | P | 0.200 | -2.039 |
| K02A | 2007 | 114 | 16 | 18 | 16.683 | P | 0.200 | 0.007  |
| L02A | 2007 | 114 | 16 | 18 | 16.905 | P | 0.200 | -1.259 |
| S04C | 2007 | 114 | 16 | 18 | 17.146 | P | 0.200 | 0.779  |
| U04C | 2007 | 114 | 16 | 18 | 17.682 | P | 0.200 | 1.619  |
| PACP | 2007 | 114 | 16 | 18 | 18.147 | P | 0.200 | 0.913  |
| N02C | 2007 | 114 | 16 | 18 | 18.183 | P | 0.200 | -1.289 |
| Q03C | 2007 | 114 | 16 | 18 | 18.826 | P | 0.200 | 1.258  |
| SAO  | 2007 | 114 | 16 | 18 | 18.945 | P | 0.200 | 0.499  |
| WENL | 2007 | 114 | 16 | 18 | 19.287 | P | 0.200 | 0.989  |
| BDM  | 2007 | 114 | 16 | 18 | 19.353 | P | 0.200 | 1.143  |
| MHC  | 2007 | 114 | 16 | 18 | 19.439 | P | 0.200 | 1.066  |
| HAST | 2007 | 114 | 16 | 18 | 20.138 | P | 0.200 | 0.215  |
| BRIB | 2007 | 114 | 16 | 18 | 20.532 | P | 0.200 | 0.955  |
| BKS  | 2007 | 114 | 16 | 18 | 20.730 | P | 0.200 | 0.656  |
| BRK  | 2007 | 114 | 16 | 18 | 20.860 | P | 0.200 | 0.611  |
| M01C | 2007 | 114 | 16 | 18 | 20.918 | P | 0.200 | -0.269 |
| BNLO | 2007 | 114 | 16 | 18 | 21.995 | P | 0.200 | 0.551  |
| P01C | 2007 | 114 | 16 | 18 | 22.109 | P | 0.200 | -0.168 |
| JCC  | 2007 | 114 | 16 | 18 | 22.703 | P | 0.200 | -0.053 |
| HOPS | 2007 | 114 | 16 | 18 | 22.891 | P | 0.200 | 0.897  |
| O01C | 2007 | 114 | 16 | 18 | 23.511 | P | 0.200 | 0.333  |

|      |      |    |    |         |          |           |         |        |        |
|------|------|----|----|---------|----------|-----------|---------|--------|--------|
| 2007 | 63   | 22 | 39 | 24.3542 | 34.49100 | -36.90300 | 10.0000 | 313    | -0.005 |
| Q11A | 2007 | 63 | 22 | 49      | 40.921   | P         | 0.200   | -0.135 |        |
| R11A | 2007 | 63 | 22 | 49      | 41.947   | P         | 0.200   | -0.118 |        |
| P10A | 2007 | 63 | 22 | 49      | 43.102   | P         | 0.200   | 0.149  |        |
| T11A | 2007 | 63 | 22 | 49      | 43.961   | P         | 0.200   | 0.721  |        |
| O09A | 2007 | 63 | 22 | 49      | 45.027   | P         | 0.200   | 0.013  |        |
| S11A | 2007 | 63 | 22 | 49      | 45.368   | P         | 0.200   | 0.569  |        |
| P09A | 2007 | 63 | 22 | 49      | 46.465   | P         | 0.200   | -0.007 |        |
| U11A | 2007 | 63 | 22 | 49      | 47.032   | P         | 0.200   | 0.885  |        |
| N08A | 2007 | 63 | 22 | 49      | 47.767   | P         | 0.200   | -0.169 |        |

|      |      |    |    |    |        |   |       |        |
|------|------|----|----|----|--------|---|-------|--------|
| S10A | 2007 | 63 | 22 | 49 | 47.947 | P | 0.200 | -0.179 |
| Q09A | 2007 | 63 | 22 | 49 | 48.526 | P | 0.200 | -0.056 |
| V11A | 2007 | 63 | 22 | 49 | 48.715 | P | 0.200 | 0.612  |
| R09A | 2007 | 63 | 22 | 49 | 49.396 | P | 0.200 | -0.170 |
| TPNV | 2007 | 63 | 22 | 49 | 49.608 | P | 0.200 | 0.474  |
| M07A | 2007 | 63 | 22 | 49 | 50.928 | P | 0.200 | -0.072 |
| L07A | 2007 | 63 | 22 | 49 | 51.044 | P | 0.200 | 0.771  |
| S09A | 2007 | 63 | 22 | 49 | 51.327 | P | 0.200 | -0.422 |
| N07B | 2007 | 63 | 22 | 49 | 51.367 | P | 0.200 | -0.434 |
| Q08A | 2007 | 63 | 22 | 49 | 51.379 | P | 0.200 | -0.620 |
| O07A | 2007 | 63 | 22 | 49 | 52.529 | P | 0.200 | -0.326 |
| TUQ  | 2007 | 63 | 22 | 49 | 52.569 | P | 0.200 | 0.994  |
| SHO  | 2007 | 63 | 22 | 49 | 52.766 | P | 0.200 | 0.897  |
| FUR  | 2007 | 63 | 22 | 49 | 54.072 | P | 0.200 | 0.874  |
| P07A | 2007 | 63 | 22 | 49 | 54.206 | P | 0.200 | -0.463 |
| GRA  | 2007 | 63 | 22 | 49 | 54.502 | P | 0.200 | 0.266  |
| N06A | 2007 | 63 | 22 | 49 | 55.580 | P | 0.200 | -0.182 |
| K05A | 2007 | 63 | 22 | 49 | 55.847 | P | 0.200 | 0.467  |
| HEC  | 2007 | 63 | 22 | 49 | 56.090 | P | 0.200 | 0.760  |
| J05A | 2007 | 63 | 22 | 49 | 56.091 | P | 0.200 | 0.729  |
| S08C | 2007 | 63 | 22 | 49 | 56.978 | P | 0.200 | -0.171 |
| O06A | 2007 | 63 | 22 | 49 | 57.020 | P | 0.200 | -0.255 |
| GSC  | 2007 | 63 | 22 | 49 | 57.078 | P | 0.200 | 0.836  |
| L05A | 2007 | 63 | 22 | 49 | 57.585 | P | 0.200 | 0.742  |
| I04A | 2007 | 63 | 22 | 49 | 57.943 | P | 0.200 | -1.134 |
| M06C | 2007 | 63 | 22 | 49 | 57.985 | P | 0.200 | 0.482  |
| SNB9 | 2007 | 63 | 22 | 49 | 58.015 | P | 0.200 | -0.512 |
| SN98 | 2007 | 63 | 22 | 49 | 58.060 | P | 0.200 | -0.807 |
| MPM  | 2007 | 63 | 22 | 49 | 58.542 | P | 0.200 | 0.814  |
| SNA8 | 2007 | 63 | 22 | 49 | 58.635 | P | 0.200 | -0.772 |
| TIN  | 2007 | 63 | 22 | 49 | 58.739 | P | 0.200 | 0.403  |
| SND9 | 2007 | 63 | 22 | 49 | 58.828 | P | 0.200 | -0.286 |
| WCN  | 2007 | 63 | 22 | 49 | 59.089 | P | 0.200 | -0.416 |
| SNE9 | 2007 | 63 | 22 | 49 | 59.105 | P | 0.200 | -0.271 |
| K04A | 2007 | 63 | 22 | 49 | 59.218 | P | 0.200 | -0.099 |
| SNF9 | 2007 | 63 | 22 | 49 | 59.392 | P | 0.200 | -0.566 |
| J04A | 2007 | 63 | 22 | 49 | 59.404 | P | 0.200 | -0.023 |
| R06C | 2007 | 63 | 22 | 49 | 59.504 | P | 0.200 | -0.726 |
| R07C | 2007 | 63 | 22 | 49 | 59.603 | P | 0.200 | 0.088  |
| SNC8 | 2007 | 63 | 22 | 49 | 59.887 | P | 0.200 | -0.443 |
| MLAC | 2007 | 63 | 22 | 49 | 59.975 | P | 0.200 | 0.151  |
| CWC  | 2007 | 63 | 22 | 50 | 0.027  | P | 0.200 | 0.706  |
| BEK  | 2007 | 63 | 22 | 50 | 0.121  | P | 0.200 | -0.549 |
| SND8 | 2007 | 63 | 22 | 50 | 0.198  | P | 0.200 | -0.489 |
| SN97 | 2007 | 63 | 22 | 50 | 0.419  | P | 0.200 | -0.598 |
| M05C | 2007 | 63 | 22 | 50 | 0.438  | P | 0.200 | 0.423  |
| ELFS | 2007 | 63 | 22 | 50 | 0.509  | P | 0.200 | 0.210  |
| LRL  | 2007 | 63 | 22 | 50 | 0.796  | P | 0.200 | 0.629  |
| L04A | 2007 | 63 | 22 | 50 | 1.059  | P | 0.200 | -0.174 |
| SN14 | 2007 | 63 | 22 | 50 | 1.192  | P | 0.200 | 0.180  |
| SNF8 | 2007 | 63 | 22 | 50 | 1.220  | P | 0.200 | -0.339 |
| J03A | 2007 | 63 | 22 | 50 | 1.329  | P | 0.200 | -1.273 |
| SN34 | 2007 | 63 | 22 | 50 | 1.809  | P | 0.200 | 0.265  |
| VTV  | 2007 | 63 | 22 | 50 | 1.824  | P | 0.200 | 0.854  |
| SVD  | 2007 | 63 | 22 | 50 | 1.882  | P | 0.200 | 0.897  |
| SND7 | 2007 | 63 | 22 | 50 | 1.930  | P | 0.200 | -0.437 |
| SNC7 | 2007 | 63 | 22 | 50 | 1.970  | P | 0.200 | -0.502 |
| SNE7 | 2007 | 63 | 22 | 50 | 2.067  | P | 0.200 | -0.361 |
| M04C | 2007 | 63 | 22 | 50 | 2.092  | P | 0.200 | -0.036 |
| SN65 | 2007 | 63 | 22 | 50 | 2.372  | P | 0.200 | 0.376  |
| O04C | 2007 | 63 | 22 | 50 | 2.598  | P | 0.200 | -0.169 |
| O05C | 2007 | 63 | 22 | 50 | 2.665  | P | 0.200 | -0.181 |
| SN75 | 2007 | 63 | 22 | 50 | 2.696  | P | 0.200 | 0.218  |



|      |      |    |    |    |        |   |       |        |
|------|------|----|----|----|--------|---|-------|--------|
| SN12 | 2007 | 63 | 22 | 50 | 2.883  | P | 0.200 | 0.328  |
| HUMO | 2007 | 63 | 22 | 50 | 2.971  | P | 0.200 | -1.567 |
| HATC | 2007 | 63 | 22 | 50 | 3.135  | P | 0.200 | 0.230  |
| SN85 | 2007 | 63 | 22 | 50 | 3.255  | P | 0.200 | -0.002 |
| HELL | 2007 | 63 | 22 | 50 | 3.302  | P | 0.200 | 0.210  |
| P05C | 2007 | 63 | 22 | 50 | 3.312  | P | 0.200 | -0.087 |
| SN64 | 2007 | 63 | 22 | 50 | 3.388  | P | 0.200 | 0.332  |
| SNG7 | 2007 | 63 | 22 | 50 | 3.567  | P | 0.200 | -0.150 |
| SNE6 | 2007 | 63 | 22 | 50 | 3.669  | P | 0.200 | -0.185 |
| SN43 | 2007 | 63 | 22 | 50 | 3.835  | P | 0.200 | 0.302  |
| DBO  | 2007 | 63 | 22 | 50 | 3.874  | P | 0.200 | -0.666 |
| BFS  | 2007 | 63 | 22 | 50 | 3.940  | P | 0.200 | 0.359  |
| EDW2 | 2007 | 63 | 22 | 50 | 3.943  | P | 0.200 | 0.687  |
| SNF6 | 2007 | 63 | 22 | 50 | 4.027  | P | 0.200 | -0.434 |
| SNB5 | 2007 | 63 | 22 | 50 | 4.120  | P | 0.200 | -0.220 |
| SNA5 | 2007 | 63 | 22 | 50 | 4.139  | P | 0.200 | 0.203  |
| S06C | 2007 | 63 | 22 | 50 | 4.235  | P | 0.200 | 0.587  |
| YBH  | 2007 | 63 | 22 | 50 | 4.236  | P | 0.200 | -1.783 |
| M03C | 2007 | 63 | 22 | 50 | 4.237  | P | 0.200 | -0.381 |
| SN74 | 2007 | 63 | 22 | 50 | 4.284  | P | 0.200 | 0.335  |
| SNC5 | 2007 | 63 | 22 | 50 | 4.290  | P | 0.200 | -0.389 |
| ISA  | 2007 | 63 | 22 | 50 | 4.294  | P | 0.200 | 0.918  |
| SND5 | 2007 | 63 | 22 | 50 | 4.395  | P | 0.200 | -0.648 |
| SN95 | 2007 | 63 | 22 | 50 | 4.458  | P | 0.200 | 0.057  |
| SN63 | 2007 | 63 | 22 | 50 | 4.531  | P | 0.200 | 0.427  |
| SN84 | 2007 | 63 | 22 | 50 | 4.558  | P | 0.200 | 0.160  |
| RCT  | 2007 | 63 | 22 | 50 | 4.652  | P | 0.200 | -0.420 |
| T06C | 2007 | 63 | 22 | 50 | 4.824  | P | 0.200 | -0.431 |
| LAVA | 2007 | 63 | 22 | 50 | 4.833  | P | 0.200 | -0.604 |
| SNE5 | 2007 | 63 | 22 | 50 | 4.876  | P | 0.200 | -0.628 |
| SNA4 | 2007 | 63 | 22 | 50 | 5.095  | P | 0.200 | -0.071 |
| SNC4 | 2007 | 63 | 22 | 50 | 5.140  | P | 0.200 | -0.856 |
| VCS  | 2007 | 63 | 22 | 50 | 5.521  | P | 0.200 | 0.456  |
| CHF  | 2007 | 63 | 22 | 50 | 5.554  | P | 0.200 | 0.542  |
| SND4 | 2007 | 63 | 22 | 50 | 5.620  | P | 0.200 | -0.777 |
| SNG5 | 2007 | 63 | 22 | 50 | 5.652  | P | 0.200 | -0.610 |
| CMB  | 2007 | 63 | 22 | 50 | 5.710  | P | 0.200 | -0.014 |
| MWC  | 2007 | 63 | 22 | 50 | 5.774  | P | 0.200 | 0.267  |
| SNE4 | 2007 | 63 | 22 | 50 | 6.024  | P | 0.200 | -0.617 |
| ORV  | 2007 | 63 | 22 | 50 | 6.037  | P | 0.200 | -0.504 |
| SNA3 | 2007 | 63 | 22 | 50 | 6.181  | P | 0.200 | -0.054 |
| SN93 | 2007 | 63 | 22 | 50 | 6.240  | P | 0.200 | -0.087 |
| WDC  | 2007 | 63 | 22 | 50 | 6.267  | P | 0.200 | -2.051 |
| M02C | 2007 | 63 | 22 | 50 | 6.304  | P | 0.200 | -1.291 |
| O03C | 2007 | 63 | 22 | 50 | 6.558  | P | 0.200 | -1.200 |
| DEC  | 2007 | 63 | 22 | 50 | 6.721  | P | 0.200 | 0.029  |
| SNB3 | 2007 | 63 | 22 | 50 | 6.776  | P | 0.200 | -0.087 |
| SNC3 | 2007 | 63 | 22 | 50 | 7.223  | P | 0.200 | -0.266 |
| S05C | 2007 | 63 | 22 | 50 | 7.474  | P | 0.200 | 0.269  |
| DJJ  | 2007 | 63 | 22 | 50 | 7.477  | P | 0.200 | -0.171 |
| SUTB | 2007 | 63 | 22 | 50 | 7.538  | P | 0.200 | -1.095 |
| ARV  | 2007 | 63 | 22 | 50 | 7.716  | P | 0.200 | 1.255  |
| R04C | 2007 | 63 | 22 | 50 | 7.926  | P | 0.200 | 0.428  |
| L02A | 2007 | 63 | 22 | 50 | 7.967  | P | 0.200 | -0.617 |
| Q04C | 2007 | 63 | 22 | 50 | 8.018  | P | 0.200 | 0.048  |
| V05C | 2007 | 63 | 22 | 50 | 8.905  | P | 0.200 | -0.568 |
| O02C | 2007 | 63 | 22 | 50 | 8.939  | P | 0.200 | -1.703 |
| RPV  | 2007 | 63 | 22 | 50 | 8.972  | P | 0.200 | 0.707  |
| U05C | 2007 | 63 | 22 | 50 | 9.048  | P | 0.200 | -0.079 |
| N02C | 2007 | 63 | 22 | 50 | 10.026 | P | 0.200 | -1.108 |
| CIA  | 2007 | 63 | 22 | 50 | 10.101 | P | 0.200 | 0.707  |
| LGU  | 2007 | 63 | 22 | 50 | 10.606 | P | 0.200 | 0.088  |
| T05C | 2007 | 63 | 22 | 50 | 11.094 | P | 0.200 | 1.025  |

|      |      |    |    |    |        |   |       |        |
|------|------|----|----|----|--------|---|-------|--------|
| PKD  | 2007 | 63 | 22 | 50 | 11.678 | P | 0.200 | -0.702 |
| S04C | 2007 | 63 | 22 | 50 | 11.792 | P | 0.200 | 0.326  |
| Q03C | 2007 | 63 | 22 | 50 | 12.542 | P | 0.200 | 1.032  |
| U04C | 2007 | 63 | 22 | 50 | 12.713 | P | 0.200 | 0.464  |
| MPP  | 2007 | 63 | 22 | 50 | 13.126 | P | 0.200 | 1.097  |
| BDM  | 2007 | 63 | 22 | 50 | 13.432 | P | 0.200 | 0.687  |
| PACP | 2007 | 63 | 22 | 50 | 13.563 | P | 0.200 | 0.836  |
| WENL | 2007 | 63 | 22 | 50 | 13.727 | P | 0.200 | 0.601  |
| MHC  | 2007 | 63 | 22 | 50 | 14.049 | P | 0.200 | 0.572  |
| JCC  | 2007 | 63 | 22 | 50 | 14.311 | P | 0.200 | 0.142  |
| CVS  | 2007 | 63 | 22 | 50 | 14.413 | P | 0.200 | 0.233  |
| SAO  | 2007 | 63 | 22 | 50 | 14.595 | P | 0.200 | 0.514  |
| BRIB | 2007 | 63 | 22 | 50 | 14.633 | P | 0.200 | 0.590  |
| BRK  | 2007 | 63 | 22 | 50 | 14.858 | P | 0.200 | 0.164  |
| P01C | 2007 | 63 | 22 | 50 | 14.918 | P | 0.200 | -0.127 |
| BKS  | 2007 | 63 | 22 | 50 | 15.285 | P | 0.200 | 0.758  |
| V03C | 2007 | 63 | 22 | 50 | 15.739 | P | 0.200 | 0.408  |
| HAST | 2007 | 63 | 22 | 50 | 15.747 | P | 0.200 | -0.084 |
| O01C | 2007 | 63 | 22 | 50 | 15.751 | P | 0.200 | 0.516  |
| HOPS | 2007 | 63 | 22 | 50 | 15.933 | P | 0.200 | 0.692  |
| BNLO | 2007 | 63 | 22 | 50 | 16.772 | P | 0.200 | 0.231  |

|      |      |    |    |         |          |           |         |        |        |
|------|------|----|----|---------|----------|-----------|---------|--------|--------|
| 2007 | 60   | 23 | 11 | 52.5072 | 26.58100 | -44.59400 | 10.0000 | 311    | -0.002 |
| Q11A | 2007 | 60 | 23 | 21      | 57.024   | P         | 0.200   | -0.061 |        |
| R11A | 2007 | 60 | 23 | 21      | 57.530   | P         | 0.200   | 0.062  |        |
| T11A | 2007 | 60 | 23 | 21      | 57.767   | P         | 0.200   | 0.720  |        |
| U11A | 2007 | 60 | 23 | 21      | 59.631   | P         | 0.200   | 0.611  |        |
| S11A | 2007 | 60 | 23 | 22      | 0.020    | P         | 0.200   | 0.646  |        |
| V11A | 2007 | 60 | 23 | 22      | 0.611    | P         | 0.200   | 0.331  |        |
| Q10A | 2007 | 60 | 23 | 22      | 1.225    | P         | 0.200   | 0.038  |        |
| R10A | 2007 | 60 | 23 | 22      | 1.755    | P         | 0.200   | 0.416  |        |
| O09A | 2007 | 60 | 23 | 22      | 3.202    | P         | 0.200   | -0.177 |        |
| S10A | 2007 | 60 | 23 | 22      | 3.519    | P         | 0.200   | 0.088  |        |
| TPNV | 2007 | 60 | 23 | 22      | 3.760    | P         | 0.200   | 0.695  |        |
| TUQ  | 2007 | 60 | 23 | 22      | 4.060    | P         | 0.200   | 0.526  |        |
| P09A | 2007 | 60 | 23 | 22      | 4.127    | P         | 0.200   | 0.096  |        |
| SHO  | 2007 | 60 | 23 | 22      | 5.140    | P         | 0.200   | 0.579  |        |
| U10A | 2007 | 60 | 23 | 22      | 5.184    | P         | 0.200   | 1.107  |        |
| Q09A | 2007 | 60 | 23 | 22      | 5.193    | P         | 0.200   | -0.049 |        |
| R09A | 2007 | 60 | 23 | 22      | 5.269    | P         | 0.200   | -0.209 |        |
| TPH  | 2007 | 60 | 23 | 22      | 6.298    | P         | 0.200   | -0.310 |        |
| S09A | 2007 | 60 | 23 | 22      | 6.925    | P         | 0.200   | -0.174 |        |
| N08A | 2007 | 60 | 23 | 22      | 7.084    | P         | 0.200   | -0.343 |        |
| HEC  | 2007 | 60 | 23 | 22      | 7.154    | P         | 0.200   | 0.393  |        |
| FUR  | 2007 | 60 | 23 | 22      | 7.613    | P         | 0.200   | 0.781  |        |
| O08A | 2007 | 60 | 23 | 22      | 7.861    | P         | 0.200   | -0.408 |        |
| Q08A | 2007 | 60 | 23 | 22      | 8.389    | P         | 0.200   | -0.633 |        |
| P08A | 2007 | 60 | 23 | 22      | 8.409    | P         | 0.200   | -0.062 |        |
| GSC  | 2007 | 60 | 23 | 22      | 8.838    | P         | 0.200   | 0.389  |        |
| GRA  | 2007 | 60 | 23 | 22      | 9.218    | P         | 0.200   | 0.464  |        |
| R08A | 2007 | 60 | 23 | 22      | 10.244   | P         | 0.200   | -0.407 |        |
| RRX  | 2007 | 60 | 23 | 22      | 10.608   | P         | 0.200   | 0.449  |        |
| SLA  | 2007 | 60 | 23 | 22      | 10.704   | P         | 0.200   | 0.632  |        |
| N07B | 2007 | 60 | 23 | 22      | 10.945   | P         | 0.200   | -0.672 |        |
| M07A | 2007 | 60 | 23 | 22      | 11.101   | P         | 0.200   | -0.589 |        |
| O07A | 2007 | 60 | 23 | 22      | 11.394   | P         | 0.200   | -0.503 |        |
| BBR  | 2007 | 60 | 23 | 22      | 11.611   | P         | 0.200   | 0.580  |        |
| MPM  | 2007 | 60 | 23 | 22      | 11.733   | P         | 0.200   | 0.585  |        |
| L07A | 2007 | 60 | 23 | 22      | 11.980   | P         | 0.200   | 0.187  |        |
| SVD  | 2007 | 60 | 23 | 22      | 12.483   | P         | 0.200   | 0.532  |        |
| VTV  | 2007 | 60 | 23 | 22      | 12.870   | P         | 0.200   | 0.308  |        |
| LRL  | 2007 | 60 | 23 | 22      | 13.092   | P         | 0.200   | 0.078  |        |
| S08C | 2007 | 60 | 23 | 22      | 13.117   | P         | 0.200   | 0.492  |        |

|      |      |    |    |    |        |   |       |        |
|------|------|----|----|----|--------|---|-------|--------|
| TIN  | 2007 | 60 | 23 | 22 | 13.816 | P | 0.200 | 0.518  |
| CWC  | 2007 | 60 | 23 | 22 | 14.101 | P | 0.200 | 0.612  |
| BFS  | 2007 | 60 | 23 | 22 | 14.881 | P | 0.200 | -0.091 |
| N06A | 2007 | 60 | 23 | 22 | 15.193 | P | 0.200 | -0.712 |
| EDW2 | 2007 | 60 | 23 | 22 | 15.793 | P | 0.200 | 0.233  |
| SN98 | 2007 | 60 | 23 | 22 | 15.906 | P | 0.200 | -0.664 |
| O06A | 2007 | 60 | 23 | 22 | 16.158 | P | 0.200 | -0.537 |
| SNB9 | 2007 | 60 | 23 | 22 | 16.171 | P | 0.200 | -0.669 |
| MLAC | 2007 | 60 | 23 | 22 | 16.265 | P | 0.200 | 0.511  |
| R07C | 2007 | 60 | 23 | 22 | 16.338 | P | 0.200 | 0.259  |
| SN14 | 2007 | 60 | 23 | 22 | 16.567 | P | 0.200 | 0.258  |
| SNA8 | 2007 | 60 | 23 | 22 | 16.674 | P | 0.200 | -0.728 |
| CHF  | 2007 | 60 | 23 | 22 | 16.689 | P | 0.200 | -0.075 |
| MWC  | 2007 | 60 | 23 | 22 | 16.901 | P | 0.200 | -0.218 |
| VCS  | 2007 | 60 | 23 | 22 | 16.925 | P | 0.200 | -0.051 |
| WCN  | 2007 | 60 | 23 | 22 | 17.191 | P | 0.200 | -0.606 |
| R06C | 2007 | 60 | 23 | 22 | 17.285 | P | 0.200 | -0.177 |
| ISA  | 2007 | 60 | 23 | 22 | 17.538 | P | 0.200 | 0.724  |
| SND9 | 2007 | 60 | 23 | 22 | 17.622 | P | 0.200 | -0.539 |
| SN34 | 2007 | 60 | 23 | 22 | 17.763 | P | 0.200 | 0.488  |
| SN12 | 2007 | 60 | 23 | 22 | 17.860 | P | 0.200 | 0.136  |
| DEC  | 2007 | 60 | 23 | 22 | 17.922 | P | 0.200 | -0.530 |
| HELL | 2007 | 60 | 23 | 22 | 18.047 | P | 0.200 | 0.052  |
| SNE9 | 2007 | 60 | 23 | 22 | 18.162 | P | 0.200 | -0.584 |
| M06C | 2007 | 60 | 23 | 22 | 18.254 | P | 0.200 | -0.183 |
| SN55 | 2007 | 60 | 23 | 22 | 18.281 | P | 0.200 | 0.387  |
| SNC8 | 2007 | 60 | 23 | 22 | 18.362 | P | 0.200 | -0.610 |
| K05A | 2007 | 60 | 23 | 22 | 18.413 | P | 0.200 | 0.076  |
| SN97 | 2007 | 60 | 23 | 22 | 18.495 | P | 0.200 | -0.256 |
| SNA7 | 2007 | 60 | 23 | 22 | 18.639 | P | 0.200 | -0.312 |
| SNF9 | 2007 | 60 | 23 | 22 | 18.721 | P | 0.200 | -0.851 |
| DJJ  | 2007 | 60 | 23 | 22 | 18.823 | P | 0.200 | -0.460 |
| SND8 | 2007 | 60 | 23 | 22 | 18.963 | P | 0.200 | -0.623 |
| RCT  | 2007 | 60 | 23 | 22 | 19.010 | P | 0.200 | -0.592 |
| BEK  | 2007 | 60 | 23 | 22 | 19.053 | P | 0.200 | -0.840 |
| SN65 | 2007 | 60 | 23 | 22 | 19.203 | P | 0.200 | 0.544  |
| J05A | 2007 | 60 | 23 | 22 | 19.273 | P | 0.200 | 0.138  |
| L05A | 2007 | 60 | 23 | 22 | 19.430 | P | 0.200 | 0.488  |
| SN43 | 2007 | 60 | 23 | 22 | 19.803 | P | 0.200 | 0.328  |
| OSI  | 2007 | 60 | 23 | 22 | 19.874 | P | 0.200 | 0.105  |
| SN75 | 2007 | 60 | 23 | 22 | 19.956 | P | 0.200 | 0.594  |
| SN64 | 2007 | 60 | 23 | 22 | 20.114 | P | 0.200 | 0.509  |
| R05C | 2007 | 60 | 23 | 22 | 20.174 | P | 0.200 | -0.221 |
| ARV  | 2007 | 60 | 23 | 22 | 20.263 | P | 0.200 | 0.774  |
| T06C | 2007 | 60 | 23 | 22 | 20.315 | P | 0.200 | -0.514 |
| CIA  | 2007 | 60 | 23 | 22 | 20.434 | P | 0.200 | 0.199  |
| TOV  | 2007 | 60 | 23 | 22 | 20.481 | P | 0.200 | -0.707 |
| SNF8 | 2007 | 60 | 23 | 22 | 20.538 | P | 0.200 | -0.547 |
| SND7 | 2007 | 60 | 23 | 22 | 20.755 | P | 0.200 | -0.633 |
| SN96 | 2007 | 60 | 23 | 22 | 20.813 | P | 0.200 | 0.322  |
| SN85 | 2007 | 60 | 23 | 22 | 20.866 | P | 0.200 | 0.451  |
| S06C | 2007 | 60 | 23 | 22 | 21.020 | P | 0.200 | 0.706  |
| SNB6 | 2007 | 60 | 23 | 22 | 21.149 | P | 0.200 | 0.040  |
| SNE7 | 2007 | 60 | 23 | 22 | 21.314 | P | 0.200 | -0.404 |
| SN74 | 2007 | 60 | 23 | 22 | 21.328 | P | 0.200 | 0.569  |
| M05C | 2007 | 60 | 23 | 22 | 21.393 | P | 0.200 | 0.030  |
| SNA5 | 2007 | 60 | 23 | 22 | 21.882 | P | 0.200 | 0.198  |
| SN84 | 2007 | 60 | 23 | 22 | 21.947 | P | 0.200 | 0.448  |
| LGU  | 2007 | 60 | 23 | 22 | 22.067 | P | 0.200 | -0.419 |
| SNC6 | 2007 | 60 | 23 | 22 | 22.085 | P | 0.200 | 0.380  |
| SN95 | 2007 | 60 | 23 | 22 | 22.103 | P | 0.200 | 0.347  |
| K04A | 2007 | 60 | 23 | 22 | 22.128 | P | 0.200 | -0.288 |
| P05C | 2007 | 60 | 23 | 22 | 22.262 | P | 0.200 | 0.201  |

|      |      |    |    |    |        |   |       |        |
|------|------|----|----|----|--------|---|-------|--------|
| O05C | 2007 | 60 | 23 | 22 | 22.383 | P | 0.200 | -0.021 |
| SNB5 | 2007 | 60 | 23 | 22 | 22.434 | P | 0.200 | 0.035  |
| O04C | 2007 | 60 | 23 | 22 | 22.514 | P | 0.200 | -0.320 |
| SNE6 | 2007 | 60 | 23 | 22 | 22.676 | P | 0.200 | -0.150 |
| SNC5 | 2007 | 60 | 23 | 22 | 22.772 | P | 0.200 | -0.301 |
| I04A | 2007 | 60 | 23 | 22 | 22.845 | P | 0.200 | -1.016 |
| SNA4 | 2007 | 60 | 23 | 22 | 22.960 | P | 0.200 | 0.131  |
| V05C | 2007 | 60 | 23 | 22 | 23.018 | P | 0.200 | -0.793 |
| CMB  | 2007 | 60 | 23 | 22 | 23.059 | P | 0.200 | 0.288  |
| J04A | 2007 | 60 | 23 | 22 | 23.119 | P | 0.200 | -0.307 |
| SND5 | 2007 | 60 | 23 | 22 | 23.197 | P | 0.200 | -0.515 |
| LAVA | 2007 | 60 | 23 | 22 | 23.284 | P | 0.200 | -0.205 |
| SNG7 | 2007 | 60 | 23 | 22 | 23.313 | P | 0.200 | -0.247 |
| SNF6 | 2007 | 60 | 23 | 22 | 23.377 | P | 0.200 | -0.400 |
| L04A | 2007 | 60 | 23 | 22 | 23.584 | P | 0.200 | -0.262 |
| U05C | 2007 | 60 | 23 | 22 | 23.600 | P | 0.200 | -0.528 |
| S05C | 2007 | 60 | 23 | 22 | 23.641 | P | 0.200 | 0.183  |
| HATC | 2007 | 60 | 23 | 22 | 23.695 | P | 0.200 | -0.030 |
| SNE5 | 2007 | 60 | 23 | 22 | 23.899 | P | 0.200 | -0.593 |
| SNC4 | 2007 | 60 | 23 | 22 | 23.940 | P | 0.200 | -0.345 |
| SN93 | 2007 | 60 | 23 | 22 | 24.022 | P | 0.200 | 0.369  |
| SNA3 | 2007 | 60 | 23 | 22 | 24.028 | P | 0.200 | 0.198  |
| M04C | 2007 | 60 | 23 | 22 | 24.168 | P | 0.200 | -0.065 |
| SND4 | 2007 | 60 | 23 | 22 | 24.335 | P | 0.200 | -0.646 |
| SNB3 | 2007 | 60 | 23 | 22 | 24.905 | P | 0.200 | 0.080  |
| SNE4 | 2007 | 60 | 23 | 22 | 25.047 | P | 0.200 | -0.479 |
| SNG5 | 2007 | 60 | 23 | 22 | 25.221 | P | 0.200 | -0.561 |
| SMM  | 2007 | 60 | 23 | 22 | 25.348 | P | 0.200 | 0.076  |
| ORV  | 2007 | 60 | 23 | 22 | 25.450 | P | 0.200 | -0.418 |
| M03C | 2007 | 60 | 23 | 22 | 25.699 | P | 0.200 | -0.537 |
| R04C | 2007 | 60 | 23 | 22 | 25.774 | P | 0.200 | 0.673  |
| SNC3 | 2007 | 60 | 23 | 22 | 25.954 | P | 0.200 | 0.281  |
| MPP  | 2007 | 60 | 23 | 22 | 25.987 | P | 0.200 | 0.703  |
| HUMO | 2007 | 60 | 23 | 22 | 26.645 | P | 0.200 | -1.422 |
| Q04C | 2007 | 60 | 23 | 22 | 26.785 | P | 0.200 | 0.393  |
| T05C | 2007 | 60 | 23 | 22 | 26.795 | P | 0.200 | 0.839  |
| YBH  | 2007 | 60 | 23 | 22 | 26.915 | P | 0.200 | -1.496 |
| O03C | 2007 | 60 | 23 | 22 | 27.008 | P | 0.200 | -0.802 |
| SUTB | 2007 | 60 | 23 | 22 | 27.083 | P | 0.200 | -0.629 |
| WDC  | 2007 | 60 | 23 | 22 | 27.256 | P | 0.200 | -2.018 |
| U04C | 2007 | 60 | 23 | 22 | 27.555 | P | 0.200 | -0.063 |
| PHL  | 2007 | 60 | 23 | 22 | 27.936 | P | 0.200 | -0.031 |
| M02C | 2007 | 60 | 23 | 22 | 28.278 | P | 0.200 | -1.348 |
| S04C | 2007 | 60 | 23 | 22 | 28.837 | P | 0.200 | 0.507  |
| O02C | 2007 | 60 | 23 | 22 | 29.749 | P | 0.200 | -1.461 |
| PACP | 2007 | 60 | 23 | 22 | 29.771 | P | 0.200 | 0.731  |
| SAO  | 2007 | 60 | 23 | 22 | 30.499 | P | 0.200 | 0.315  |
| MHC  | 2007 | 60 | 23 | 22 | 31.248 | P | 0.200 | 0.937  |
| BDM  | 2007 | 60 | 23 | 22 | 31.280 | P | 0.200 | 0.922  |
| Q03C | 2007 | 60 | 23 | 22 | 31.287 | P | 0.200 | 1.339  |
| WENL | 2007 | 60 | 23 | 22 | 31.297 | P | 0.200 | 0.966  |
| HAST | 2007 | 60 | 23 | 22 | 31.526 | P | 0.200 | -0.009 |
| MNRC | 2007 | 60 | 23 | 22 | 32.444 | P | 0.200 | 0.734  |
| BRIB | 2007 | 60 | 23 | 22 | 32.565 | P | 0.200 | 0.830  |
| BRK  | 2007 | 60 | 23 | 22 | 32.936 | P | 0.200 | 0.532  |
| JRSC | 2007 | 60 | 23 | 22 | 33.579 | P | 0.200 | 0.448  |
| BNLO | 2007 | 60 | 23 | 22 | 33.920 | P | 0.200 | 0.572  |
| P01C | 2007 | 60 | 23 | 22 | 35.326 | P | 0.200 | 0.307  |
| O01C | 2007 | 60 | 23 | 22 | 36.625 | P | 0.200 | 0.460  |

|      |      |     |    |         |          |           |         |       |       |
|------|------|-----|----|---------|----------|-----------|---------|-------|-------|
| 1988 | 247  | 12  | 3  | 56.4886 | 16.81200 | -61.09700 | 60.0000 | 435   | 0.000 |
| arc  | 1988 | 247 | 12 | 13      | 14.520   | P         | 0.200   | 0.086 |       |
| bkr  | 1988 | 247 | 12 | 13      | 15.770   | P         | 0.200   | 0.420 |       |

|     |      |     |    |    |        |   |       |        |
|-----|------|-----|----|----|--------|---|-------|--------|
| bmd | 1988 | 247 | 12 | 13 | 14.400 | P | 0.200 | 0.107  |
| ccr | 1988 | 247 | 12 | 13 | 17.100 | P | 0.200 | -0.065 |
| jhn | 1988 | 247 | 12 | 13 | 15.650 | P | 0.200 | 0.174  |
| ndl | 1988 | 247 | 12 | 13 | 15.380 | P | 0.200 | 0.109  |
| WMD | 1988 | 247 | 12 | 13 | 16.090 | P | 0.200 | 0.132  |
| BMT | 1988 | 247 | 12 | 13 | 15.180 | P | 0.200 | -0.031 |
| CAL | 1988 | 247 | 12 | 13 | 11.270 | P | 0.200 | -0.014 |
| DTP | 1988 | 247 | 12 | 13 | 10.850 | P | 0.200 | 0.030  |
| ISA | 1988 | 247 | 12 | 13 | 14.960 | P | 0.200 | 0.150  |
| WHV | 1988 | 247 | 12 | 13 | 15.110 | P | 0.200 | 0.166  |
| CLC | 1988 | 247 | 12 | 13 | 9.040  | P | 0.200 | -0.536 |
| SRT | 1988 | 247 | 12 | 13 | 10.260 | P | 0.200 | -0.166 |
| TOW | 1988 | 247 | 12 | 13 | 10.470 | P | 0.200 | -0.071 |
| WCH | 1988 | 247 | 12 | 13 | 12.650 | P | 0.200 | -0.134 |
| WLH | 1988 | 247 | 12 | 13 | 14.620 | P | 0.200 | 0.217  |
| WRC | 1988 | 247 | 12 | 13 | 10.440 | P | 0.200 | 0.378  |
| WSC | 1988 | 247 | 12 | 13 | 10.730 | P | 0.200 | -0.562 |
| WVP | 1988 | 247 | 12 | 13 | 10.870 | P | 0.200 | -0.272 |
| XMS | 1988 | 247 | 12 | 13 | 7.940  | P | 0.200 | -0.118 |

|      |     |   |   |         |          |           |         |     |        |
|------|-----|---|---|---------|----------|-----------|---------|-----|--------|
| 1988 | 240 | 7 | 4 | 41.4652 | 31.01300 | -64.86700 | 10.0000 | 431 | -0.001 |
|------|-----|---|---|---------|----------|-----------|---------|-----|--------|

|     |      |     |   |    |        |   |       |        |
|-----|------|-----|---|----|--------|---|-------|--------|
| arc | 1988 | 240 | 7 | 12 | 52.340 | P | 0.200 | -0.021 |
| bkr | 1988 | 240 | 7 | 12 | 53.970 | P | 0.200 | 0.176  |
| bmd | 1988 | 240 | 7 | 12 | 52.550 | P | 0.200 | 0.099  |
| ccr | 1988 | 240 | 7 | 12 | 53.650 | P | 0.200 | -0.545 |
| jhn | 1988 | 240 | 7 | 12 | 53.700 | P | 0.200 | 0.157  |
| jun | 1988 | 240 | 7 | 12 | 51.800 | P | 0.200 | -0.280 |
| ndl | 1988 | 240 | 7 | 12 | 53.000 | P | 0.200 | -0.065 |
| pmt | 1988 | 240 | 7 | 12 | 51.320 | P | 0.200 | -0.089 |
| WMD | 1988 | 240 | 7 | 12 | 53.560 | P | 0.200 | -0.036 |
| BLK | 1988 | 240 | 7 | 12 | 46.200 | P | 0.200 | 0.059  |
| BMT | 1988 | 240 | 7 | 12 | 55.100 | P | 0.200 | 0.063  |
| CAL | 1988 | 240 | 7 | 12 | 50.840 | P | 0.200 | 0.003  |
| DTP | 1988 | 240 | 7 | 12 | 50.030 | P | 0.200 | -0.050 |
| FLS | 1988 | 240 | 7 | 12 | 45.000 | P | 0.200 | -0.200 |
| GSC | 1988 | 240 | 7 | 12 | 43.240 | P | 0.200 | 0.084  |
| HOD | 1988 | 240 | 7 | 12 | 46.590 | P | 0.200 | -0.070 |
| ISA | 1988 | 240 | 7 | 12 | 53.850 | P | 0.200 | 0.370  |
| WHV | 1988 | 240 | 7 | 12 | 54.100 | P | 0.200 | 0.044  |
| WJP | 1988 | 240 | 7 | 12 | 54.200 | P | 0.200 | 0.300  |

|      |     |   |    |         |          |           |         |     |       |
|------|-----|---|----|---------|----------|-----------|---------|-----|-------|
| 1988 | 249 | 6 | 13 | 20.3359 | 18.42000 | -70.40300 | 27.0000 | 437 | 0.000 |
|------|-----|---|----|---------|----------|-----------|---------|-----|-------|

|     |      |     |   |    |        |   |       |        |
|-----|------|-----|---|----|--------|---|-------|--------|
| arc | 1988 | 249 | 6 | 21 | 38.490 | P | 0.200 | 0.017  |
| bkr | 1988 | 249 | 6 | 21 | 39.690 | P | 0.200 | 0.333  |
| ccr | 1988 | 249 | 6 | 21 | 41.860 | P | 0.200 | 0.071  |
| jhn | 1988 | 249 | 6 | 21 | 39.800 | P | 0.200 | 0.192  |
| WMD | 1988 | 249 | 6 | 21 | 40.470 | P | 0.200 | 0.210  |
| cou | 1988 | 249 | 6 | 21 | 38.970 | P | 0.200 | 0.277  |
| jun | 1988 | 249 | 6 | 21 | 39.690 | P | 0.200 | 0.015  |
| twr | 1988 | 249 | 6 | 21 | 39.500 | P | 0.200 | 0.194  |
| ARV | 1988 | 249 | 6 | 21 | 40.430 | P | 0.200 | 0.218  |
| CLC | 1988 | 249 | 6 | 21 | 32.680 | P | 0.200 | -0.497 |
| LRM | 1988 | 249 | 6 | 21 | 33.280 | P | 0.200 | -0.195 |
| SRT | 1988 | 249 | 6 | 21 | 33.850 | P | 0.200 | -0.167 |
| TEJ | 1988 | 249 | 6 | 21 | 39.610 | P | 0.200 | 0.131  |
| TJR | 1988 | 249 | 6 | 21 | 39.460 | P | 0.200 | -0.035 |
| TOW | 1988 | 249 | 6 | 21 | 34.140 | P | 0.200 | -0.071 |
| WBM | 1988 | 249 | 6 | 21 | 34.630 | P | 0.200 | -0.206 |
| WBS | 1988 | 249 | 6 | 21 | 36.400 | P | 0.200 | -0.165 |
| WCH | 1988 | 249 | 6 | 21 | 36.350 | P | 0.200 | -0.295 |
| WLH | 1988 | 249 | 6 | 21 | 38.680 | P | 0.200 | 0.163  |
| WOF | 1988 | 249 | 6 | 21 | 40.240 | P | 0.200 | 0.130  |
| WRC | 1988 | 249 | 6 | 21 | 33.340 | P | 0.200 | -0.414 |

|     |      |     |   |    |        |   |       |        |
|-----|------|-----|---|----|--------|---|-------|--------|
| WVP | 1988 | 249 | 6 | 21 | 34.580 | P | 0.200 | -0.324 |
| XMS | 1988 | 249 | 6 | 21 | 31.310 | P | 0.200 | -0.071 |
| BMT | 1988 | 249 | 6 | 21 | 38.840 | P | 0.200 | 0.054  |
| CAL | 1988 | 249 | 6 | 21 | 34.620 | P | 0.200 | 0.046  |
| DTP | 1988 | 249 | 6 | 21 | 34.250 | P | 0.200 | 0.097  |
| ISA | 1988 | 249 | 6 | 21 | 38.880 | P | 0.200 | 0.191  |
| JFS | 1988 | 249 | 6 | 21 | 33.240 | P | 0.200 | 0.018  |
| WJP | 1988 | 249 | 6 | 21 | 38.580 | P | 0.200 | 0.081  |

|      |      |     |    |         |          |           |         |        |       |
|------|------|-----|----|---------|----------|-----------|---------|--------|-------|
| 2005 | 251  | 5   | 55 | 42.9864 | 21.31700 | -45.80500 | 10.0000 | 17     | 0.001 |
| TUQ  | 2005 | 251 | 6  | 6       | 4.664    | P         | 0.200   | 0.226  |       |
| TPH  | 2005 | 251 | 6  | 6       | 8.885    | P         | 0.200   | -0.409 |       |
| FUR  | 2005 | 251 | 6  | 6       | 9.093    | P         | 0.200   | 0.663  |       |
| GSC  | 2005 | 251 | 6  | 6       | 9.459    | P         | 0.200   | 0.205  |       |
| GRA  | 2005 | 251 | 6  | 6       | 11.063   | P         | 0.200   | 0.337  |       |
| MPM  | 2005 | 251 | 6  | 6       | 12.734   | P         | 0.200   | 0.275  |       |
| LRL  | 2005 | 251 | 6  | 6       | 13.898   | P         | 0.200   | -0.047 |       |
| SN28 | 2005 | 251 | 6  | 6       | 14.141   | P         | 0.200   | -0.116 |       |
| S08C | 2005 | 251 | 6  | 6       | 15.351   | P         | 0.200   | 0.428  |       |
| CWC  | 2005 | 251 | 6  | 6       | 15.366   | P         | 0.200   | 0.282  |       |
| SN16 | 2005 | 251 | 6  | 6       | 15.719   | P         | 0.200   | 0.501  |       |
| EDW2 | 2005 | 251 | 6  | 6       | 16.146   | P         | 0.200   | 0.043  |       |
| SN37 | 2005 | 251 | 6  | 6       | 16.269   | P         | 0.200   | -0.092 |       |
| SN47 | 2005 | 251 | 6  | 6       | 17.074   | P         | 0.200   | -0.152 |       |
| SN36 | 2005 | 251 | 6  | 6       | 17.208   | P         | 0.200   | 0.091  |       |
| SN15 | 2005 | 251 | 6  | 6       | 17.522   | P         | 0.200   | 0.282  |       |
| SN25 | 2005 | 251 | 6  | 6       | 17.895   | P         | 0.200   | 0.214  |       |
| ISA  | 2005 | 251 | 6  | 6       | 18.480   | P         | 0.200   | 0.584  |       |
| SN24 | 2005 | 251 | 6  | 6       | 19.205   | P         | 0.200   | 0.016  |       |
| SN67 | 2005 | 251 | 6  | 6       | 19.209   | P         | 0.200   | 0.053  |       |
| SN45 | 2005 | 251 | 6  | 6       | 19.608   | P         | 0.200   | 0.250  |       |
| SN56 | 2005 | 251 | 6  | 6       | 19.691   | P         | 0.200   | 0.024  |       |
| SN11 | 2005 | 251 | 6  | 6       | 20.012   | P         | 0.200   | -1.146 |       |
| R06C | 2005 | 251 | 6  | 6       | 20.142   | P         | 0.200   | -0.284 |       |
| SN23 | 2005 | 251 | 6  | 6       | 20.201   | P         | 0.200   | -0.260 |       |
| SN66 | 2005 | 251 | 6  | 6       | 20.537   | P         | 0.200   | 0.281  |       |
| SN44 | 2005 | 251 | 6  | 6       | 20.635   | P         | 0.200   | 0.099  |       |
| ARV  | 2005 | 251 | 6  | 6       | 20.900   | P         | 0.200   | 0.673  |       |
| SN43 | 2005 | 251 | 6  | 6       | 21.723   | P         | 0.200   | 0.003  |       |
| SN86 | 2005 | 251 | 6  | 6       | 22.425   | P         | 0.200   | 0.055  |       |
| SN53 | 2005 | 251 | 6  | 6       | 22.455   | P         | 0.200   | 0.016  |       |
| M06C | 2005 | 251 | 6  | 6       | 22.647   | P         | 0.200   | -0.494 |       |
| SN52 | 2005 | 251 | 6  | 6       | 22.785   | P         | 0.200   | -0.331 |       |
| SN63 | 2005 | 251 | 6  | 6       | 23.133   | P         | 0.200   | 0.137  |       |
| R05C | 2005 | 251 | 6  | 6       | 23.242   | P         | 0.200   | -0.253 |       |
| SN74 | 2005 | 251 | 6  | 6       | 23.474   | P         | 0.200   | 0.085  |       |
| SN85 | 2005 | 251 | 6  | 6       | 23.558   | P         | 0.200   | 0.322  |       |
| SN62 | 2005 | 251 | 6  | 6       | 23.671   | P         | 0.200   | -0.211 |       |
| SN51 | 2005 | 251 | 6  | 6       | 24.069   | P         | 0.200   | -0.384 |       |
| SN73 | 2005 | 251 | 6  | 6       | 24.242   | P         | 0.200   | -0.073 |       |
| SN84 | 2005 | 251 | 6  | 6       | 24.354   | P         | 0.200   | 0.118  |       |
| SN95 | 2005 | 251 | 6  | 6       | 24.675   | P         | 0.200   | 0.050  |       |
| CMB  | 2005 | 251 | 6  | 6       | 25.185   | P         | 0.200   | -0.246 |       |
| S05C | 2005 | 251 | 6  | 6       | 25.615   | P         | 0.200   | -0.065 |       |
| SN71 | 2005 | 251 | 6  | 6       | 25.652   | P         | 0.200   | -0.246 |       |
| M05C | 2005 | 251 | 6  | 6       | 25.912   | P         | 0.200   | -0.253 |       |
| LAVA | 2005 | 251 | 6  | 6       | 26.277   | P         | 0.200   | -0.326 |       |
| R04C | 2005 | 251 | 6  | 6       | 28.291   | P         | 0.200   | 0.383  |       |
| U04C | 2005 | 251 | 6  | 6       | 28.739   | P         | 0.200   | -0.463 |       |
| ORV  | 2005 | 251 | 6  | 6       | 28.848   | P         | 0.200   | -0.630 |       |
| M04C | 2005 | 251 | 6  | 6       | 29.032   | P         | 0.200   | -0.225 |       |
| M03C | 2005 | 251 | 6  | 6       | 30.329   | P         | 0.200   | -0.622 |       |
| S04C | 2005 | 251 | 6  | 6       | 30.716   | P         | 0.200   | 0.073  |       |

|      |      |     |    |         |          |           |         |        |     |        |
|------|------|-----|----|---------|----------|-----------|---------|--------|-----|--------|
| MNRC | 2005 | 251 | 6  | 6       | 35.447   | P         | 0.200   | 0.559  |     |        |
| 2006 | 61   | 23  | 35 | 47.4050 | 19.35800 | -63.78700 | 24.8000 |        | 115 | -0.021 |
| TUQ  | 2006 | 61  | 23 | 44      | 28.148   | P         | 0.200   | 0.332  |     |        |
| HEC  | 2006 | 61  | 23 | 44      | 30.351   | P         | 0.200   | 0.436  |     |        |
| SHO  | 2006 | 61  | 23 | 44      | 30.658   | P         | 0.200   | 0.503  |     |        |
| GSC  | 2006 | 61  | 23 | 44      | 33.522   | P         | 0.200   | 0.344  |     |        |
| FUR  | 2006 | 61  | 23 | 44      | 34.780   | P         | 0.200   | 0.649  |     |        |
| TPH  | 2006 | 61  | 23 | 44      | 38.011   | P         | 0.200   | 0.221  |     |        |
| GRA  | 2006 | 61  | 23 | 44      | 38.173   | P         | 0.200   | 0.474  |     |        |
| MPM  | 2006 | 61  | 23 | 44      | 38.198   | P         | 0.200   | 0.232  |     |        |
| LRL  | 2006 | 61  | 23 | 44      | 38.760   | P         | 0.200   | -0.026 |     |        |
| EDW2 | 2006 | 61  | 23 | 44      | 40.507   | P         | 0.200   | 0.126  |     |        |
| CWC  | 2006 | 61  | 23 | 44      | 42.289   | P         | 0.200   | 0.515  |     |        |
| TIN  | 2006 | 61  | 23 | 44      | 43.578   | P         | 0.200   | 0.605  |     |        |
| S08C | 2006 | 61  | 23 | 44      | 43.925   | P         | 0.200   | 0.692  |     |        |
| SN28 | 2006 | 61  | 23 | 44      | 43.930   | P         | 0.200   | 0.682  |     |        |
| SN16 | 2006 | 61  | 23 | 44      | 44.026   | P         | 0.200   | 0.595  |     |        |
| ISA  | 2006 | 61  | 23 | 44      | 44.326   | P         | 0.200   | 0.616  |     |        |
| OSI  | 2006 | 61  | 23 | 44      | 44.386   | P         | 0.200   | -0.396 |     |        |
| SN38 | 2006 | 61  | 23 | 44      | 44.855   | P         | 0.200   | 0.313  |     |        |
| LGU  | 2006 | 61  | 23 | 44      | 45.113   | P         | 0.200   | -1.593 |     |        |
| SN15 | 2006 | 61  | 23 | 44      | 45.888   | P         | 0.200   | 0.372  |     |        |
| SN48 | 2006 | 61  | 23 | 44      | 45.908   | P         | 0.200   | 0.124  |     |        |
| SN37 | 2006 | 61  | 23 | 44      | 46.028   | P         | 0.200   | 0.534  |     |        |
| ARV  | 2006 | 61  | 23 | 44      | 46.083   | P         | 0.200   | 0.517  |     |        |
| SN25 | 2006 | 61  | 23 | 44      | 46.417   | P         | 0.200   | 0.184  |     |        |
| SN36 | 2006 | 61  | 23 | 44      | 46.637   | P         | 0.200   | 0.513  |     |        |
| SN47 | 2006 | 61  | 23 | 44      | 47.130   | P         | 0.200   | 0.449  |     |        |
| HELL | 2006 | 61  | 23 | 44      | 47.676   | P         | 0.200   | 0.122  |     |        |
| VES  | 2006 | 61  | 23 | 44      | 47.789   | P         | 0.200   | 0.431  |     |        |
| SN46 | 2006 | 61  | 23 | 44      | 48.317   | P         | 0.200   | 0.595  |     |        |
| O07A | 2006 | 61  | 23 | 44      | 48.802   | P         | 0.200   | -0.367 |     |        |
| SN23 | 2006 | 61  | 23 | 44      | 48.968   | P         | 0.200   | -0.105 |     |        |
| SN21 | 2006 | 61  | 23 | 44      | 48.992   | P         | 0.200   | -1.428 |     |        |
| SN22 | 2006 | 61  | 23 | 44      | 49.428   | P         | 0.200   | -0.333 |     |        |
| SN44 | 2006 | 61  | 23 | 44      | 49.775   | P         | 0.200   | 0.086  |     |        |
| N07A | 2006 | 61  | 23 | 44      | 50.011   | P         | 0.200   | -0.275 |     |        |
| T06C | 2006 | 61  | 23 | 44      | 50.307   | P         | 0.200   | -1.367 |     |        |
| SN55 | 2006 | 61  | 23 | 44      | 50.625   | P         | 0.200   | 0.269  |     |        |
| SN54 | 2006 | 61  | 23 | 44      | 51.298   | P         | 0.200   | 0.135  |     |        |
| SN53 | 2006 | 61  | 23 | 44      | 51.828   | P         | 0.200   | -0.106 |     |        |
| R06C | 2006 | 61  | 23 | 44      | 51.846   | P         | 0.200   | 0.557  |     |        |
| M07A | 2006 | 61  | 23 | 44      | 52.036   | P         | 0.200   | -0.013 |     |        |
| MPP  | 2006 | 61  | 23 | 44      | 52.149   | P         | 0.200   | 0.373  |     |        |
| SN76 | 2006 | 61  | 23 | 44      | 52.203   | P         | 0.200   | 0.582  |     |        |
| SN51 | 2006 | 61  | 23 | 44      | 52.957   | P         | 0.200   | -0.933 |     |        |
| SMM  | 2006 | 61  | 23 | 44      | 53.189   | P         | 0.200   | 0.356  |     |        |
| S06C | 2006 | 61  | 23 | 44      | 53.366   | P         | 0.200   | 0.174  |     |        |
| SN62 | 2006 | 61  | 23 | 44      | 53.367   | P         | 0.200   | -0.441 |     |        |
| SN73 | 2006 | 61  | 23 | 44      | 54.526   | P         | 0.200   | -0.122 |     |        |
| SN85 | 2006 | 61  | 23 | 44      | 54.674   | P         | 0.200   | 0.540  |     |        |
| PKD  | 2006 | 61  | 23 | 44      | 55.047   | P         | 0.200   | -1.262 |     |        |
| S05C | 2006 | 61  | 23 | 44      | 55.210   | P         | 0.200   | -0.319 |     |        |
| R05C | 2006 | 61  | 23 | 44      | 55.597   | P         | 0.200   | 0.436  |     |        |
| SN71 | 2006 | 61  | 23 | 44      | 55.696   | P         | 0.200   | -0.425 |     |        |
| CMB  | 2006 | 61  | 23 | 44      | 56.104   | P         | 0.200   | -0.197 |     |        |
| BEK  | 2006 | 61  | 23 | 44      | 56.479   | P         | 0.200   | -0.943 |     |        |
| U04C | 2006 | 61  | 23 | 44      | 57.086   | P         | 0.200   | -0.870 |     |        |
| LAVA | 2006 | 61  | 23 | 44      | 58.867   | P         | 0.200   | 0.079  |     |        |
| P05C | 2006 | 61  | 23 | 44      | 59.304   | P         | 0.200   | 0.796  |     |        |
| O05C | 2006 | 61  | 23 | 45      | 0.011    | P         | 0.200   | -0.550 |     |        |
| M06C | 2006 | 61  | 23 | 45      | 0.013    | P         | 0.200   | 0.903  |     |        |

|      |      |    |    |    |        |   |       |        |
|------|------|----|----|----|--------|---|-------|--------|
| R04C | 2006 | 61 | 23 | 45 | 0.125  | P | 0.200 | 0.557  |
| PACP | 2006 | 61 | 23 | 45 | 1.213  | P | 0.200 | 0.027  |
| S04C | 2006 | 61 | 23 | 45 | 1.450  | P | 0.200 | -0.013 |
| ORV  | 2006 | 61 | 23 | 45 | 3.392  | P | 0.200 | -0.071 |
| SUTB | 2006 | 61 | 23 | 45 | 4.775  | P | 0.200 | -0.193 |
| BDM  | 2006 | 61 | 23 | 45 | 5.468  | P | 0.200 | 0.633  |
| WDC  | 2006 | 61 | 23 | 45 | 7.631  | P | 0.200 | -2.376 |
| YBH  | 2006 | 61 | 23 | 45 | 10.101 | P | 0.200 | -1.654 |
| M02C | 2006 | 61 | 23 | 45 | 11.003 | P | 0.200 | -1.300 |

|      |      |     |    |         |         |           |         |        |        |
|------|------|-----|----|---------|---------|-----------|---------|--------|--------|
| 2006 | 118  | 7   | 22 | 42.6533 | 3.92400 | -31.51100 | 10.0000 | 121    | -0.026 |
| TUQ  | 2006 | 118 | 7  | 35      | 9.729   | P         | 0.200   | 0.153  |        |
| SHO  | 2006 | 118 | 7  | 35      | 11.147  | P         | 0.200   | 0.296  |        |
| TPNV | 2006 | 118 | 7  | 35      | 11.485  | P         | 0.200   | 0.541  |        |
| HEC  | 2006 | 118 | 7  | 35      | 11.665  | P         | 0.200   | 0.324  |        |
| GSC  | 2006 | 118 | 7  | 35      | 13.369  | P         | 0.200   | 0.114  |        |
| FUR  | 2006 | 118 | 7  | 35      | 14.060  | P         | 0.200   | 0.792  |        |
| Q09A | 2006 | 118 | 7  | 35      | 14.214  | P         | 0.200   | -0.480 |        |
| BBR  | 2006 | 118 | 7  | 35      | 14.305  | P         | 0.200   | 0.355  |        |
| P09A | 2006 | 118 | 7  | 35      | 14.329  | P         | 0.200   | -0.183 |        |
| TPH  | 2006 | 118 | 7  | 35      | 14.853  | P         | 0.200   | -0.048 |        |
| S09A | 2006 | 118 | 7  | 35      | 14.926  | P         | 0.200   | 0.022  |        |
| O09A | 2006 | 118 | 7  | 35      | 15.013  | P         | 0.200   | 0.396  |        |
| GRA  | 2006 | 118 | 7  | 35      | 15.683  | P         | 0.200   | 0.298  |        |
| MPM  | 2006 | 118 | 7  | 35      | 16.443  | P         | 0.200   | 0.242  |        |
| BFS  | 2006 | 118 | 7  | 35      | 16.445  | P         | 0.200   | -0.558 |        |
| Q08A | 2006 | 118 | 7  | 35      | 16.714  | P         | 0.200   | -0.786 |        |
| LRL  | 2006 | 118 | 7  | 35      | 16.930  | P         | 0.200   | -0.001 |        |
| P08A | 2006 | 118 | 7  | 35      | 17.631  | P         | 0.200   | -0.320 |        |
| EDW2 | 2006 | 118 | 7  | 35      | 18.119  | P         | 0.200   | -0.089 |        |
| R08A | 2006 | 118 | 7  | 35      | 18.140  | P         | 0.200   | -0.190 |        |
| N08A | 2006 | 118 | 7  | 35      | 18.160  | P         | 0.200   | -0.074 |        |
| CHF  | 2006 | 118 | 7  | 35      | 18.261  | P         | 0.200   | -0.249 |        |
| SN28 | 2006 | 118 | 7  | 35      | 18.831  | P         | 0.200   | 0.193  |        |
| SN16 | 2006 | 118 | 7  | 35      | 19.223  | P         | 0.200   | 0.198  |        |
| S08C | 2006 | 118 | 7  | 35      | 19.273  | P         | 0.200   | 0.315  |        |
| SN38 | 2006 | 118 | 7  | 35      | 19.488  | P         | 0.200   | 0.068  |        |
| SN48 | 2006 | 118 | 7  | 35      | 20.234  | P         | 0.200   | 0.101  |        |
| ISA  | 2006 | 118 | 7  | 35      | 20.541  | P         | 0.200   | 0.448  |        |
| SN37 | 2006 | 118 | 7  | 35      | 20.573  | P         | 0.200   | 0.417  |        |
| SN15 | 2006 | 118 | 7  | 35      | 20.648  | P         | 0.200   | 0.047  |        |
| O07A | 2006 | 118 | 7  | 35      | 20.743  | P         | 0.200   | -0.254 |        |
| SN25 | 2006 | 118 | 7  | 35      | 20.955  | P         | 0.200   | 0.012  |        |
| N07B | 2006 | 118 | 7  | 35      | 21.128  | P         | 0.200   | -0.240 |        |
| SN47 | 2006 | 118 | 7  | 35      | 21.226  | P         | 0.200   | 0.338  |        |
| SN11 | 2006 | 118 | 7  | 35      | 21.755  | P         | 0.200   | -1.389 |        |
| RCT  | 2006 | 118 | 7  | 35      | 21.896  | P         | 0.200   | -1.095 |        |
| ARV  | 2006 | 118 | 7  | 35      | 21.909  | P         | 0.200   | 0.416  |        |
| SN21 | 2006 | 118 | 7  | 35      | 22.181  | P         | 0.200   | -1.700 |        |
| M07A | 2006 | 118 | 7  | 35      | 22.205  | P         | 0.200   | 0.206  |        |
| SN57 | 2006 | 118 | 7  | 35      | 22.286  | P         | 0.200   | 0.418  |        |
| SN23 | 2006 | 118 | 7  | 35      | 22.452  | P         | 0.200   | -0.469 |        |
| R07C | 2006 | 118 | 7  | 35      | 22.606  | P         | 0.200   | 0.494  |        |
| SN22 | 2006 | 118 | 7  | 35      | 22.646  | P         | 0.200   | -0.743 |        |
| SN67 | 2006 | 118 | 7  | 35      | 22.923  | P         | 0.200   | 0.357  |        |
| SN44 | 2006 | 118 | 7  | 35      | 23.251  | P         | 0.200   | 0.033  |        |
| SN55 | 2006 | 118 | 7  | 35      | 23.652  | P         | 0.200   | 0.267  |        |
| SN54 | 2006 | 118 | 7  | 35      | 24.127  | P         | 0.200   | 0.143  |        |
| R06C | 2006 | 118 | 7  | 35      | 24.263  | P         | 0.200   | 0.621  |        |
| SN52 | 2006 | 118 | 7  | 35      | 24.525  | P         | 0.200   | -0.483 |        |
| SN76 | 2006 | 118 | 7  | 35      | 24.531  | P         | 0.200   | 0.634  |        |
| SN53 | 2006 | 118 | 7  | 35      | 24.548  | P         | 0.200   | -0.050 |        |
| O06A | 2006 | 118 | 7  | 35      | 24.587  | P         | 0.200   | -0.042 |        |



|      |      |     |   |    |        |   |       |        |
|------|------|-----|---|----|--------|---|-------|--------|
| WCN  | 2006 | 118 | 7 | 35 | 24.911 | P | 0.200 | 0.229  |
| S06C | 2006 | 118 | 7 | 35 | 25.361 | P | 0.200 | 0.188  |
| SN62 | 2006 | 118 | 7 | 35 | 25.570 | P | 0.200 | -0.150 |
| SN51 | 2006 | 118 | 7 | 35 | 25.692 | P | 0.200 | -0.327 |
| SN73 | 2006 | 118 | 7 | 35 | 26.190 | P | 0.200 | -0.017 |
| BEK  | 2006 | 118 | 7 | 35 | 26.787 | P | 0.200 | 0.038  |
| S05C | 2006 | 118 | 7 | 35 | 27.030 | P | 0.200 | 0.082  |
| SN71 | 2006 | 118 | 7 | 35 | 27.057 | P | 0.200 | -0.250 |
| CMB  | 2006 | 118 | 7 | 35 | 27.059 | P | 0.200 | -0.143 |
| M06C | 2006 | 118 | 7 | 35 | 27.418 | P | 0.200 | 0.535  |
| P05C | 2006 | 118 | 7 | 35 | 28.088 | P | 0.200 | 0.194  |
| LAVA | 2006 | 118 | 7 | 35 | 28.304 | P | 0.200 | -0.116 |
| O05C | 2006 | 118 | 7 | 35 | 28.706 | P | 0.200 | -0.005 |
| O04C | 2006 | 118 | 7 | 35 | 29.098 | P | 0.200 | -0.310 |
| M05C | 2006 | 118 | 7 | 35 | 29.229 | P | 0.200 | -0.006 |
| R04C | 2006 | 118 | 7 | 35 | 29.513 | P | 0.200 | 0.397  |
| ORV  | 2006 | 118 | 7 | 35 | 30.361 | P | 0.200 | -0.530 |
| Q04C | 2006 | 118 | 7 | 35 | 31.333 | P | 0.200 | 0.658  |
| N02C | 2006 | 118 | 7 | 35 | 36.902 | P | 0.200 | -0.279 |

|      |      |     |    |         |          |           |         |        |        |
|------|------|-----|----|---------|----------|-----------|---------|--------|--------|
| 2005 | 339  | 13  | 16 | 31.0096 | 16.61400 | -46.55400 | 10.0000 | 43     | -0.001 |
| TUQ  | 2005 | 339 | 13 | 27      | 4.715    | P         | 0.200   | 0.387  |        |
| TPNV | 2005 | 339 | 13 | 27      | 6.430    | P         | 0.200   | 0.713  |        |
| HEC  | 2005 | 339 | 13 | 27      | 7.010    | P         | 0.200   | 0.295  |        |
| GSC  | 2005 | 339 | 13 | 27      | 9.325    | P         | 0.200   | 0.294  |        |
| FUR  | 2005 | 339 | 13 | 27      | 9.624    | P         | 0.200   | 0.777  |        |
| TPH  | 2005 | 339 | 13 | 27      | 10.399   | P         | 0.200   | -0.174 |        |
| BBR  | 2005 | 339 | 13 | 27      | 10.723   | P         | 0.200   | 0.470  |        |
| GRA  | 2005 | 339 | 13 | 27      | 11.957   | P         | 0.200   | 0.535  |        |
| MPM  | 2005 | 339 | 13 | 27      | 12.938   | P         | 0.200   | 0.348  |        |
| LRL  | 2005 | 339 | 13 | 27      | 13.811   | P         | 0.200   | 0.075  |        |
| BFS  | 2005 | 339 | 13 | 27      | 14.044   | P         | 0.200   | -0.110 |        |
| MNV  | 2005 | 339 | 13 | 27      | 14.563   | P         | 0.200   | -0.647 |        |
| SN28 | 2005 | 339 | 13 | 27      | 15.579   | P         | 0.200   | 0.186  |        |
| EDW2 | 2005 | 339 | 13 | 27      | 15.651   | P         | 0.200   | 0.099  |        |
| CWC  | 2005 | 339 | 13 | 27      | 15.896   | P         | 0.200   | 0.480  |        |
| SN38 | 2005 | 339 | 13 | 27      | 16.281   | P         | 0.200   | -0.117 |        |
| SN48 | 2005 | 339 | 13 | 27      | 17.190   | P         | 0.200   | -0.145 |        |
| SN37 | 2005 | 339 | 13 | 27      | 17.632   | P         | 0.200   | 0.224  |        |
| SN15 | 2005 | 339 | 13 | 27      | 18.033   | P         | 0.200   | 0.054  |        |
| SN36 | 2005 | 339 | 13 | 27      | 18.440   | P         | 0.200   | 0.341  |        |
| ISA  | 2005 | 339 | 13 | 27      | 18.448   | P         | 0.200   | 0.687  |        |
| SN47 | 2005 | 339 | 13 | 27      | 18.464   | P         | 0.200   | 0.142  |        |
| SN46 | 2005 | 339 | 13 | 27      | 19.753   | P         | 0.200   | 0.412  |        |
| SN57 | 2005 | 339 | 13 | 27      | 19.763   | P         | 0.200   | 0.250  |        |
| HELL | 2005 | 339 | 13 | 27      | 20.077   | P         | 0.200   | -0.094 |        |
| R07C | 2005 | 339 | 13 | 27      | 20.136   | P         | 0.200   | 0.245  |        |
| ARV  | 2005 | 339 | 13 | 27      | 20.397   | P         | 0.200   | 0.626  |        |
| SN34 | 2005 | 339 | 13 | 27      | 20.460   | P         | 0.200   | 0.190  |        |
| VES  | 2005 | 339 | 13 | 27      | 20.500   | P         | 0.200   | -0.277 |        |
| RCT  | 2005 | 339 | 13 | 27      | 20.620   | P         | 0.200   | -0.717 |        |
| SN45 | 2005 | 339 | 13 | 27      | 20.756   | P         | 0.200   | 0.452  |        |
| SN23 | 2005 | 339 | 13 | 27      | 20.832   | P         | 0.200   | -0.262 |        |
| SN44 | 2005 | 339 | 13 | 27      | 21.569   | P         | 0.200   | 0.214  |        |
| SN55 | 2005 | 339 | 13 | 27      | 21.800   | P         | 0.200   | 0.289  |        |
| R06C | 2005 | 339 | 13 | 27      | 21.921   | P         | 0.200   | 0.141  |        |
| T06C | 2005 | 339 | 13 | 27      | 22.150   | P         | 0.200   | -1.210 |        |
| SN43 | 2005 | 339 | 13 | 27      | 22.444   | P         | 0.200   | -0.014 |        |
| SN54 | 2005 | 339 | 13 | 27      | 22.612   | P         | 0.200   | 0.238  |        |
| SN76 | 2005 | 339 | 13 | 27      | 22.641   | P         | 0.200   | 0.489  |        |
| SN52 | 2005 | 339 | 13 | 27      | 23.145   | P         | 0.200   | -0.682 |        |
| SN53 | 2005 | 339 | 13 | 27      | 23.268   | P         | 0.200   | 0.041  |        |
| SN64 | 2005 | 339 | 13 | 27      | 23.390   | P         | 0.200   | 0.271  |        |

|      |      |     |    |    |        |   |       |        |
|------|------|-----|----|----|--------|---|-------|--------|
| SN86 | 2005 | 339 | 13 | 27 | 24.110 | P | 0.200 | 0.421  |
| S06C | 2005 | 339 | 13 | 27 | 24.299 | P | 0.200 | 0.397  |
| SN62 | 2005 | 339 | 13 | 27 | 24.451 | P | 0.200 | -0.255 |
| SN51 | 2005 | 339 | 13 | 27 | 24.564 | P | 0.200 | -0.529 |
| SN85 | 2005 | 339 | 13 | 27 | 24.869 | P | 0.200 | 0.444  |
| R05C | 2005 | 339 | 13 | 27 | 25.019 | P | 0.200 | 0.101  |
| U05C | 2005 | 339 | 13 | 27 | 25.100 | P | 0.200 | -0.737 |
| M06C | 2005 | 339 | 13 | 27 | 25.318 | P | 0.200 | -0.520 |
| SN73 | 2005 | 339 | 13 | 27 | 25.342 | P | 0.200 | 0.094  |
| MPP  | 2005 | 339 | 13 | 27 | 25.849 | P | 0.200 | 0.591  |
| SMM  | 2005 | 339 | 13 | 27 | 25.871 | P | 0.200 | 0.110  |
| SN95 | 2005 | 339 | 13 | 27 | 26.040 | P | 0.200 | 0.189  |
| S05C | 2005 | 339 | 13 | 27 | 26.242 | P | 0.200 | -0.116 |
| SN71 | 2005 | 339 | 13 | 27 | 26.383 | P | 0.200 | -0.319 |
| CMB  | 2005 | 339 | 13 | 27 | 26.429 | P | 0.200 | -0.043 |
| P05C | 2005 | 339 | 13 | 27 | 27.170 | P | 0.200 | -0.049 |
| LAVA | 2005 | 339 | 13 | 27 | 27.831 | P | 0.200 | -0.147 |
| M05C | 2005 | 339 | 13 | 27 | 28.701 | P | 0.200 | -0.199 |
| T05C | 2005 | 339 | 13 | 27 | 28.835 | P | 0.200 | 0.552  |
| U04C | 2005 | 339 | 13 | 27 | 28.855 | P | 0.200 | -0.450 |
| R04C | 2005 | 339 | 13 | 27 | 29.414 | P | 0.200 | 0.399  |
| HATC | 2005 | 339 | 13 | 27 | 30.484 | P | 0.200 | -0.107 |
| ORV  | 2005 | 339 | 13 | 27 | 30.816 | P | 0.200 | -0.388 |
| S04C | 2005 | 339 | 13 | 27 | 31.461 | P | 0.200 | 0.153  |
| Q04C | 2005 | 339 | 13 | 27 | 31.474 | P | 0.200 | 0.533  |
| PACP | 2005 | 339 | 13 | 27 | 32.060 | P | 0.200 | 0.580  |
| SAO  | 2005 | 339 | 13 | 27 | 32.430 | P | 0.200 | 0.098  |
| O03C | 2005 | 339 | 13 | 27 | 32.435 | P | 0.200 | -1.174 |
| HAST | 2005 | 339 | 13 | 27 | 32.870 | P | 0.200 | -0.325 |
| M03C | 2005 | 339 | 13 | 27 | 32.987 | P | 0.200 | -0.545 |
| WDC  | 2005 | 339 | 13 | 27 | 33.500 | P | 0.200 | -2.244 |
| MHC  | 2005 | 339 | 13 | 27 | 33.559 | P | 0.200 | 0.451  |
| WENL | 2005 | 339 | 13 | 27 | 34.080 | P | 0.200 | 0.658  |
| YBH  | 2005 | 339 | 13 | 27 | 34.354 | P | 0.200 | -1.795 |
| BKS  | 2005 | 339 | 13 | 27 | 34.503 | P | 0.200 | -1.125 |
| Q03C | 2005 | 339 | 13 | 27 | 35.183 | P | 0.200 | 1.000  |
| M02C | 2005 | 339 | 13 | 27 | 35.363 | P | 0.200 | -1.603 |
| BRIB | 2005 | 339 | 13 | 27 | 35.619 | P | 0.200 | 0.465  |
| BNLO | 2005 | 339 | 13 | 27 | 35.954 | P | 0.200 | 0.096  |
| JRSC | 2005 | 339 | 13 | 27 | 36.127 | P | 0.200 | 0.199  |
| CVS  | 2005 | 339 | 13 | 27 | 36.642 | P | 0.200 | 0.222  |
| I03A | 2005 | 339 | 13 | 27 | 36.789 | P | 0.200 | -0.853 |
| MNRC | 2005 | 339 | 13 | 27 | 36.839 | P | 0.200 | 0.657  |
| HUMO | 2005 | 339 | 13 | 27 | 36.842 | P | 0.200 | 0.066  |
| DBO  | 2005 | 339 | 13 | 27 | 37.102 | P | 0.200 | -0.889 |
| N02C | 2005 | 339 | 13 | 27 | 38.232 | P | 0.200 | -1.084 |
| P01C | 2005 | 339 | 13 | 27 | 40.573 | P | 0.200 | 0.424  |
| O01C | 2005 | 339 | 13 | 27 | 42.739 | P | 0.200 | 0.732  |
| JCC  | 2005 | 339 | 13 | 27 | 42.907 | P | 0.200 | 0.349  |

|      |      |     |    |        |         |           |         |        |        |
|------|------|-----|----|--------|---------|-----------|---------|--------|--------|
| 2005 | 357  | 18  | 4  | 0.2674 | 8.06500 | -38.04200 | 10.0000 | 52     | -0.005 |
| TUQ  | 2005 | 357 | 18 | 15     | 45.373  | P         | 0.200   | 0.084  |        |
| SHO  | 2005 | 357 | 18 | 15     | 46.874  | P         | 0.200   | 0.122  |        |
| HEC  | 2005 | 357 | 18 | 15     | 47.389  | P         | 0.200   | 0.183  |        |
| TPNV | 2005 | 357 | 18 | 15     | 47.549  | P         | 0.200   | 0.673  |        |
| GSC  | 2005 | 357 | 18 | 15     | 49.381  | P         | 0.200   | 0.019  |        |
| FUR  | 2005 | 357 | 18 | 15     | 50.140  | P         | 0.200   | 0.683  |        |
| BBR  | 2005 | 357 | 18 | 15     | 50.453  | P         | 0.200   | 0.348  |        |
| RRX  | 2005 | 357 | 18 | 15     | 50.682  | P         | 0.200   | 0.447  |        |
| GRA  | 2005 | 357 | 18 | 15     | 52.325  | P         | 0.200   | 0.484  |        |
| MPM  | 2005 | 357 | 18 | 15     | 52.806  | P         | 0.200   | 0.146  |        |
| BFS  | 2005 | 357 | 18 | 15     | 53.055  | P         | 0.200   | -0.461 |        |
| LRL  | 2005 | 357 | 18 | 15     | 53.419  | P         | 0.200   | -0.066 |        |

|      |      |     |    |    |        |   |       |        |
|------|------|-----|----|----|--------|---|-------|--------|
| EDW2 | 2005 | 357 | 18 | 15 | 54.800 | P | 0.200 | -0.103 |
| MNV  | 2005 | 357 | 18 | 15 | 55.107 | P | 0.200 | -0.344 |
| CWC  | 2005 | 357 | 18 | 15 | 55.420 | P | 0.200 | 0.237  |
| SN28 | 2005 | 357 | 18 | 15 | 55.692 | P | 0.200 | 0.174  |
| TIN  | 2005 | 357 | 18 | 15 | 55.756 | P | 0.200 | 0.005  |
| SN38 | 2005 | 357 | 18 | 15 | 56.399 | P | 0.200 | 0.001  |
| CIA  | 2005 | 357 | 18 | 15 | 57.075 | P | 0.200 | 0.119  |
| SN48 | 2005 | 357 | 18 | 15 | 57.198 | P | 0.200 | -0.017 |
| SN26 | 2005 | 357 | 18 | 15 | 57.370 | P | 0.200 | 0.372  |
| SN37 | 2005 | 357 | 18 | 15 | 57.462 | P | 0.200 | 0.249  |
| ISA  | 2005 | 357 | 18 | 15 | 57.468 | P | 0.200 | 0.443  |
| SN15 | 2005 | 357 | 18 | 15 | 57.637 | P | 0.200 | 0.006  |
| OSI  | 2005 | 357 | 18 | 15 | 57.933 | P | 0.200 | -0.268 |
| SN25 | 2005 | 357 | 18 | 15 | 57.947 | P | 0.200 | -0.100 |
| SN36 | 2005 | 357 | 18 | 15 | 58.117 | P | 0.200 | 0.299  |
| SN47 | 2005 | 357 | 18 | 15 | 58.260 | P | 0.200 | 0.230  |
| HELL | 2005 | 357 | 18 | 15 | 59.026 | P | 0.200 | -0.312 |
| ARV  | 2005 | 357 | 18 | 15 | 59.150 | P | 0.200 | 0.557  |
| SN11 | 2005 | 357 | 18 | 15 | 59.210 | P | 0.200 | -1.304 |
| SN46 | 2005 | 357 | 18 | 15 | 59.333 | P | 0.200 | 0.436  |
| RCT  | 2005 | 357 | 18 | 15 | 59.358 | P | 0.200 | -0.932 |
| SN57 | 2005 | 357 | 18 | 15 | 59.489 | P | 0.200 | 0.368  |
| SN34 | 2005 | 357 | 18 | 15 | 59.678 | P | 0.200 | 0.083  |
| SN23 | 2005 | 357 | 18 | 15 | 59.775 | P | 0.200 | -0.481 |
| SN22 | 2005 | 357 | 18 | 15 | 59.834 | P | 0.200 | -0.961 |
| R07C | 2005 | 357 | 18 | 15 | 59.894 | P | 0.200 | 0.490  |
| SN45 | 2005 | 357 | 18 | 16 | 0.087  | P | 0.200 | 0.352  |
| SN44 | 2005 | 357 | 18 | 16 | 0.569  | P | 0.200 | -0.017 |
| VES  | 2005 | 357 | 18 | 16 | 0.607  | P | 0.200 | 0.933  |
| T06C | 2005 | 357 | 18 | 16 | 1.023  | P | 0.200 | -1.131 |
| SN55 | 2005 | 357 | 18 | 16 | 1.062  | P | 0.200 | 0.254  |
| SN43 | 2005 | 357 | 18 | 16 | 1.332  | P | 0.200 | -0.180 |
| SN54 | 2005 | 357 | 18 | 16 | 1.615  | P | 0.200 | 0.124  |
| R06C | 2005 | 357 | 18 | 16 | 1.711  | P | 0.200 | 0.564  |
| SN76 | 2005 | 357 | 18 | 16 | 2.000  | P | 0.200 | 0.564  |
| SN52 | 2005 | 357 | 18 | 16 | 2.089  | P | 0.200 | -0.558 |
| SN53 | 2005 | 357 | 18 | 16 | 2.153  | P | 0.200 | -0.021 |
| S06C | 2005 | 357 | 18 | 16 | 3.012  | P | 0.200 | 0.164  |
| SN62 | 2005 | 357 | 18 | 16 | 3.182  | P | 0.200 | -0.270 |
| SN51 | 2005 | 357 | 18 | 16 | 3.367  | P | 0.200 | -0.376 |
| SN86 | 2005 | 357 | 18 | 16 | 3.453  | P | 0.200 | 0.646  |
| MPP  | 2005 | 357 | 18 | 16 | 3.745  | P | 0.200 | 0.407  |
| SN85 | 2005 | 357 | 18 | 16 | 3.813  | P | 0.200 | 0.421  |
| SN73 | 2005 | 357 | 18 | 16 | 3.912  | P | 0.200 | -0.080 |
| SMM  | 2005 | 357 | 18 | 16 | 4.183  | P | 0.200 | 0.328  |
| R05C | 2005 | 357 | 18 | 16 | 4.381  | P | 0.200 | 0.453  |
| SN95 | 2005 | 357 | 18 | 16 | 4.794  | P | 0.200 | 0.141  |
| S05C | 2005 | 357 | 18 | 16 | 4.836  | P | 0.200 | 0.016  |
| CMB  | 2005 | 357 | 18 | 16 | 4.867  | P | 0.200 | -0.240 |
| SN71 | 2005 | 357 | 18 | 16 | 4.908  | P | 0.200 | -0.298 |
| M06C | 2005 | 357 | 18 | 16 | 5.267  | P | 0.200 | 0.221  |
| PKD  | 2005 | 357 | 18 | 16 | 5.384  | P | 0.200 | -0.848 |
| P05C | 2005 | 357 | 18 | 16 | 6.212  | P | 0.200 | 0.236  |
| ELFS | 2005 | 357 | 18 | 16 | 6.225  | P | 0.200 | -0.022 |
| LAVA | 2005 | 357 | 18 | 16 | 6.509  | P | 0.200 | -0.020 |
| O05C | 2005 | 357 | 18 | 16 | 7.011  | P | 0.200 | 0.024  |
| T05C | 2005 | 357 | 18 | 16 | 7.019  | P | 0.200 | 0.633  |
| U04C | 2005 | 357 | 18 | 16 | 7.207  | P | 0.200 | 0.028  |
| O04C | 2005 | 357 | 18 | 16 | 7.504  | P | 0.200 | -0.271 |
| R04C | 2005 | 357 | 18 | 16 | 7.687  | P | 0.200 | 0.377  |
| RAMR | 2005 | 357 | 18 | 16 | 7.802  | P | 0.200 | 0.069  |
| V04C | 2005 | 357 | 18 | 16 | 7.803  | P | 0.200 | 0.067  |
| M05C | 2005 | 357 | 18 | 16 | 7.838  | P | 0.200 | 0.126  |

|      |      |     |    |    |        |   |       |        |
|------|------|-----|----|----|--------|---|-------|--------|
| ORV  | 2005 | 357 | 18 | 16 | 8.866  | P | 0.200 | -0.542 |
| S04C | 2005 | 357 | 18 | 16 | 9.320  | P | 0.200 | 0.186  |
| PACP | 2005 | 357 | 18 | 16 | 9.508  | P | 0.200 | 0.303  |
| SAO  | 2005 | 357 | 18 | 16 | 9.949  | P | 0.200 | 0.068  |
| M04C | 2005 | 357 | 18 | 16 | 10.279 | P | 0.200 | -0.273 |
| HAST | 2005 | 357 | 18 | 16 | 10.404 | P | 0.200 | -0.156 |
| O03C | 2005 | 357 | 18 | 16 | 10.426 | P | 0.200 | -1.145 |
| M03C | 2005 | 357 | 18 | 16 | 11.119 | P | 0.200 | -0.558 |
| MHC  | 2005 | 357 | 18 | 16 | 11.210 | P | 0.200 | 0.526  |
| WDC  | 2005 | 357 | 18 | 16 | 11.424 | P | 0.200 | -2.074 |
| WENL | 2005 | 357 | 18 | 16 | 11.630 | P | 0.200 | 0.646  |
| BDM  | 2005 | 357 | 18 | 16 | 11.910 | P | 0.200 | 0.485  |
| YBH  | 2005 | 357 | 18 | 16 | 12.380 | P | 0.200 | -1.619 |
| BKS  | 2005 | 357 | 18 | 16 | 12.948 | P | 0.200 | -0.011 |
| BRK  | 2005 | 357 | 18 | 16 | 13.106 | P | 0.200 | 0.066  |
| JRSC | 2005 | 357 | 18 | 16 | 13.189 | P | 0.200 | 0.084  |
| HUMO | 2005 | 357 | 18 | 16 | 13.248 | P | 0.200 | -1.348 |
| M02C | 2005 | 357 | 18 | 16 | 13.485 | P | 0.200 | -1.184 |
| CVS  | 2005 | 357 | 18 | 16 | 13.709 | P | 0.200 | -0.001 |
| GASB | 2005 | 357 | 18 | 16 | 14.925 | P | 0.200 | 0.263  |
| DBO  | 2005 | 357 | 18 | 16 | 15.295 | P | 0.200 | -0.391 |
| N02C | 2005 | 357 | 18 | 16 | 16.099 | P | 0.200 | -0.530 |
| P01C | 2005 | 357 | 18 | 16 | 17.675 | P | 0.200 | 0.536  |
| HOPS | 2005 | 357 | 18 | 16 | 18.079 | P | 0.200 | 1.941  |

|      |      |    |    |         |          |           |         |        |       |
|------|------|----|----|---------|----------|-----------|---------|--------|-------|
| 2007 | 80   | 23 | 7  | 46.7768 | 15.18500 | -45.61700 | 10.0000 | 318    | 0.020 |
| T11A | 2007 | 80 | 23 | 18      | 26.756   | P         | 0.200   | 0.621  |       |
| U11A | 2007 | 80 | 23 | 18      | 27.511   | P         | 0.200   | 0.531  |       |
| V11A | 2007 | 80 | 23 | 18      | 27.671   | P         | 0.200   | 0.345  |       |
| R11A | 2007 | 80 | 23 | 18      | 27.966   | P         | 0.200   | -0.042 |       |
| Q11A | 2007 | 80 | 23 | 18      | 28.020   | P         | 0.200   | -0.211 |       |
| S11A | 2007 | 80 | 23 | 18      | 29.614   | P         | 0.200   | 0.774  |       |
| TUQ  | 2007 | 80 | 23 | 18      | 30.288   | P         | 0.200   | 0.260  |       |
| SHO  | 2007 | 80 | 23 | 18      | 31.955   | P         | 0.200   | 0.334  |       |
| Q10A | 2007 | 80 | 23 | 18      | 32.036   | P         | 0.200   | -0.144 |       |
| R10A | 2007 | 80 | 23 | 18      | 32.116   | P         | 0.200   | 0.521  |       |
| TPNV | 2007 | 80 | 23 | 18      | 32.164   | P         | 0.200   | 0.640  |       |
| P10A | 2007 | 80 | 23 | 18      | 32.543   | P         | 0.200   | 0.213  |       |
| HEC  | 2007 | 80 | 23 | 18      | 32.588   | P         | 0.200   | 0.266  |       |
| S10A | 2007 | 80 | 23 | 18      | 33.381   | P         | 0.200   | 0.201  |       |
| GSC  | 2007 | 80 | 23 | 18      | 34.858   | P         | 0.200   | 0.207  |       |
| FUR  | 2007 | 80 | 23 | 18      | 35.211   | P         | 0.200   | 0.650  |       |
| R09A | 2007 | 80 | 23 | 18      | 35.315   | P         | 0.200   | -0.258 |       |
| P09A | 2007 | 80 | 23 | 18      | 35.648   | P         | 0.200   | -0.143 |       |
| Q09A | 2007 | 80 | 23 | 18      | 35.757   | P         | 0.200   | -0.322 |       |
| O09A | 2007 | 80 | 23 | 18      | 35.823   | P         | 0.200   | -0.155 |       |
| S09A | 2007 | 80 | 23 | 18      | 36.254   | P         | 0.200   | -0.183 |       |
| SVD  | 2007 | 80 | 23 | 18      | 37.032   | P         | 0.200   | 0.562  |       |
| GRA  | 2007 | 80 | 23 | 18      | 37.548   | P         | 0.200   | 0.403  |       |
| VTV  | 2007 | 80 | 23 | 18      | 37.863   | P         | 0.200   | 0.192  |       |
| MPM  | 2007 | 80 | 23 | 18      | 38.483   | P         | 0.200   | 0.266  |       |
| LRL  | 2007 | 80 | 23 | 18      | 39.285   | P         | 0.200   | -0.014 |       |
| BFS  | 2007 | 80 | 23 | 18      | 39.449   | P         | 0.200   | -0.152 |       |
| N08A | 2007 | 80 | 23 | 18      | 40.086   | P         | 0.200   | -0.462 |       |
| EDW2 | 2007 | 80 | 23 | 18      | 41.091   | P         | 0.200   | 0.059  |       |
| CHF  | 2007 | 80 | 23 | 18      | 41.296   | P         | 0.200   | -0.204 |       |
| CWC  | 2007 | 80 | 23 | 18      | 41.474   | P         | 0.200   | 0.448  |       |
| MWC  | 2007 | 80 | 23 | 18      | 41.556   | P         | 0.200   | -0.146 |       |
| VCS  | 2007 | 80 | 23 | 18      | 41.574   | P         | 0.200   | -0.301 |       |
| S08C | 2007 | 80 | 23 | 18      | 42.131   | P         | 0.200   | 0.616  |       |
| O07A | 2007 | 80 | 23 | 18      | 43.538   | P         | 0.200   | -0.571 |       |
| N07B | 2007 | 80 | 23 | 18      | 43.857   | P         | 0.200   | -0.692 |       |
| ISA  | 2007 | 80 | 23 | 18      | 43.871   | P         | 0.200   | 0.606  |       |

|      |      |    |    |    |        |   |       |        |
|------|------|----|----|----|--------|---|-------|--------|
| SN14 | 2007 | 80 | 23 | 18 | 44.459 | P | 0.200 | -0.185 |
| M07A | 2007 | 80 | 23 | 18 | 44.739 | P | 0.200 | -0.664 |
| SN12 | 2007 | 80 | 23 | 18 | 45.512 | P | 0.200 | -0.215 |
| HELL | 2007 | 80 | 23 | 18 | 45.546 | P | 0.200 | -0.165 |
| ARV  | 2007 | 80 | 23 | 18 | 45.888 | P | 0.200 | 0.704  |
| L07A | 2007 | 80 | 23 | 18 | 45.970 | P | 0.200 | -0.223 |
| SN34 | 2007 | 80 | 23 | 18 | 46.037 | P | 0.200 | 0.174  |
| R06C | 2007 | 80 | 23 | 18 | 47.661 | P | 0.200 | 0.224  |
| SN43 | 2007 | 80 | 23 | 18 | 47.688 | P | 0.200 | -0.335 |
| N06A | 2007 | 80 | 23 | 18 | 47.879 | P | 0.200 | -0.761 |
| O06A | 2007 | 80 | 23 | 18 | 47.959 | P | 0.200 | -0.762 |
| SN65 | 2007 | 80 | 23 | 18 | 48.446 | P | 0.200 | 0.425  |
| SN64 | 2007 | 80 | 23 | 18 | 48.958 | P | 0.200 | 0.251  |
| SN97 | 2007 | 80 | 23 | 18 | 49.325 | P | 0.200 | 0.249  |
| SN75 | 2007 | 80 | 23 | 18 | 49.328 | P | 0.200 | 0.486  |
| SN63 | 2007 | 80 | 23 | 18 | 49.593 | P | 0.200 | 0.141  |
| SN74 | 2007 | 80 | 23 | 18 | 50.079 | P | 0.200 | 0.104  |
| SN85 | 2007 | 80 | 23 | 18 | 50.449 | P | 0.200 | 0.432  |
| R05C | 2007 | 80 | 23 | 18 | 50.769 | P | 0.200 | 0.235  |
| SN96 | 2007 | 80 | 23 | 18 | 50.923 | P | 0.200 | 0.583  |
| SN84 | 2007 | 80 | 23 | 18 | 51.131 | P | 0.200 | 0.219  |
| SN95 | 2007 | 80 | 23 | 18 | 51.645 | P | 0.200 | 0.225  |
| CMB  | 2007 | 80 | 23 | 18 | 51.848 | P | 0.200 | -0.158 |
| SNA5 | 2007 | 80 | 23 | 18 | 51.856 | P | 0.200 | 0.202  |
| SNC6 | 2007 | 80 | 23 | 18 | 52.251 | P | 0.200 | 0.021  |
| SNB5 | 2007 | 80 | 23 | 18 | 52.662 | P | 0.200 | 0.053  |
| SNA4 | 2007 | 80 | 23 | 18 | 52.719 | P | 0.200 | 0.101  |
| P05C | 2007 | 80 | 23 | 18 | 52.872 | P | 0.200 | 0.035  |
| SN93 | 2007 | 80 | 23 | 18 | 53.025 | P | 0.200 | 0.022  |
| SNE7 | 2007 | 80 | 23 | 18 | 53.185 | P | 0.200 | 0.032  |
| SNC5 | 2007 | 80 | 23 | 18 | 53.408 | P | 0.200 | -0.107 |
| K05A | 2007 | 80 | 23 | 18 | 53.410 | P | 0.200 | 0.098  |
| LAVA | 2007 | 80 | 23 | 18 | 53.479 | P | 0.200 | -0.065 |
| L05A | 2007 | 80 | 23 | 18 | 53.561 | P | 0.200 | 0.456  |
| SNE6 | 2007 | 80 | 23 | 18 | 53.713 | P | 0.200 | -0.097 |
| SND5 | 2007 | 80 | 23 | 18 | 53.861 | P | 0.200 | -0.432 |
| O05C | 2007 | 80 | 23 | 18 | 53.912 | P | 0.200 | -0.034 |
| SNC4 | 2007 | 80 | 23 | 18 | 54.066 | P | 0.200 | -0.374 |
| SNF6 | 2007 | 80 | 23 | 18 | 54.473 | P | 0.200 | -0.518 |
| O04C | 2007 | 80 | 23 | 18 | 54.507 | P | 0.200 | -0.271 |
| M05C | 2007 | 80 | 23 | 18 | 54.560 | P | 0.200 | -0.072 |
| SNB3 | 2007 | 80 | 23 | 18 | 54.662 | P | 0.200 | 0.015  |
| J05A | 2007 | 80 | 23 | 18 | 54.717 | P | 0.200 | 0.010  |
| SND4 | 2007 | 80 | 23 | 18 | 54.909 | P | 0.200 | -0.432 |
| SNG7 | 2007 | 80 | 23 | 18 | 55.027 | P | 0.200 | -0.181 |
| SNE4 | 2007 | 80 | 23 | 18 | 55.839 | P | 0.200 | -0.296 |
| HATC | 2007 | 80 | 23 | 18 | 56.127 | P | 0.200 | -0.129 |
| ORV  | 2007 | 80 | 23 | 18 | 56.411 | P | 0.200 | -0.348 |
| SNG5 | 2007 | 80 | 23 | 18 | 56.482 | P | 0.200 | -0.444 |
| K04A | 2007 | 80 | 23 | 18 | 56.845 | P | 0.200 | -0.225 |
| L04A | 2007 | 80 | 23 | 18 | 57.585 | P | 0.200 | -0.346 |
| M04C | 2007 | 80 | 23 | 18 | 57.605 | P | 0.200 | -0.206 |
| J04A | 2007 | 80 | 23 | 18 | 58.254 | P | 0.200 | -0.443 |
| I04A | 2007 | 80 | 23 | 18 | 58.517 | P | 0.200 | -1.203 |
| M03C | 2007 | 80 | 23 | 18 | 58.657 | P | 0.200 | -0.522 |

|      |      |    |    |         |          |           |         |        |        |
|------|------|----|----|---------|----------|-----------|---------|--------|--------|
| 2007 | 18   | 22 | 32 | 36.6250 | 22.33100 | -45.08600 | 10.0000 | 304    | -0.002 |
| Q11A | 2007 | 18 | 22 | 42      | 54.004   | P         | 0.200   | -0.019 |        |
| V11A | 2007 | 18 | 22 | 42      | 55.908   | P         | 0.200   | 0.320  |        |
| SHO  | 2007 | 18 | 22 | 42      | 59.006   | P         | 0.200   | -0.902 |        |
| TUQ  | 2007 | 18 | 22 | 42      | 59.029   | P         | 0.200   | 0.387  |        |
| O09A | 2007 | 18 | 22 | 43      | 0.867    | P         | 0.200   | -0.086 |        |
| HEC  | 2007 | 18 | 22 | 43      | 1.789    | P         | 0.200   | 0.273  |        |

|      |      |    |    |    |        |   |       |        |
|------|------|----|----|----|--------|---|-------|--------|
| Q09A | 2007 | 18 | 22 | 43 | 1.955  | P | 0.200 | -0.162 |
| S09A | 2007 | 18 | 22 | 43 | 3.248  | P | 0.200 | -0.126 |
| FUR  | 2007 | 18 | 22 | 43 | 3.275  | P | 0.200 | 0.821  |
| GSC  | 2007 | 18 | 22 | 43 | 3.824  | P | 0.200 | 0.368  |
| N08A | 2007 | 18 | 22 | 43 | 4.870  | P | 0.200 | -0.369 |
| Q08A | 2007 | 18 | 22 | 43 | 5.237  | P | 0.200 | -0.623 |
| SLA  | 2007 | 18 | 22 | 43 | 5.951  | P | 0.200 | 0.570  |
| BBR  | 2007 | 18 | 22 | 43 | 6.088  | P | 0.200 | 0.615  |
| R08A | 2007 | 18 | 22 | 43 | 6.769  | P | 0.200 | -0.472 |
| MPM  | 2007 | 18 | 22 | 43 | 6.966  | P | 0.200 | 0.434  |
| LRL  | 2007 | 18 | 22 | 43 | 8.015  | P | 0.200 | -0.084 |
| N07B | 2007 | 18 | 22 | 43 | 8.738  | P | 0.200 | -0.662 |
| M07A | 2007 | 18 | 22 | 43 | 9.143  | P | 0.200 | -0.645 |
| S08C | 2007 | 18 | 22 | 43 | 9.396  | P | 0.200 | 0.635  |
| CWC  | 2007 | 18 | 22 | 43 | 9.526  | P | 0.200 | 0.444  |
| L07A | 2007 | 18 | 22 | 43 | 10.031 | P | 0.200 | -0.148 |
| EDW2 | 2007 | 18 | 22 | 43 | 10.547 | P | 0.200 | 0.211  |
| O07A | 2007 | 18 | 22 | 43 | 10.576 | P | 0.200 | 1.190  |
| SN14 | 2007 | 18 | 22 | 43 | 10.894 | P | 0.200 | -1.355 |
| VCS  | 2007 | 18 | 22 | 43 | 11.419 | P | 0.200 | -0.127 |
| MWC  | 2007 | 18 | 22 | 43 | 11.508 | P | 0.200 | -0.053 |
| MLAC | 2007 | 18 | 22 | 43 | 12.645 | P | 0.200 | 0.703  |
| R07C | 2007 | 18 | 22 | 43 | 12.649 | P | 0.200 | 0.160  |
| ISA  | 2007 | 18 | 22 | 43 | 12.799 | P | 0.200 | 0.800  |
| N06A | 2007 | 18 | 22 | 43 | 12.879 | P | 0.200 | -0.765 |
| SN98 | 2007 | 18 | 22 | 43 | 13.030 | P | 0.200 | -0.384 |
| SNB9 | 2007 | 18 | 22 | 43 | 13.265 | P | 0.200 | -0.640 |
| SN12 | 2007 | 18 | 22 | 43 | 13.563 | P | 0.200 | 0.012  |
| O06A | 2007 | 18 | 22 | 43 | 13.600 | P | 0.200 | -0.552 |
| HELL | 2007 | 18 | 22 | 43 | 13.680 | P | 0.200 | -0.027 |
| SN34 | 2007 | 18 | 22 | 43 | 13.814 | P | 0.200 | 0.479  |
| R06C | 2007 | 18 | 22 | 43 | 14.007 | P | 0.200 | -0.079 |
| ARV  | 2007 | 18 | 22 | 43 | 15.192 | P | 0.200 | 0.785  |
| SND9 | 2007 | 18 | 22 | 43 | 15.236 | P | 0.200 | -0.209 |
| SN97 | 2007 | 18 | 22 | 43 | 15.401 | P | 0.200 | -0.133 |
| SN65 | 2007 | 18 | 22 | 43 | 15.556 | P | 0.200 | 0.513  |
| SNE9 | 2007 | 18 | 22 | 43 | 15.569 | P | 0.200 | -0.563 |
| T06C | 2007 | 18 | 22 | 43 | 15.654 | P | 0.200 | -1.048 |
| SN43 | 2007 | 18 | 22 | 43 | 15.755 | P | 0.200 | 0.213  |
| M06C | 2007 | 18 | 22 | 43 | 16.288 | P | 0.200 | -0.092 |
| BEK  | 2007 | 18 | 22 | 43 | 16.323 | P | 0.200 | -0.850 |
| SN86 | 2007 | 18 | 22 | 43 | 16.337 | P | 0.200 | 0.312  |
| SN64 | 2007 | 18 | 22 | 43 | 16.344 | P | 0.200 | 0.444  |
| SN75 | 2007 | 18 | 22 | 43 | 16.517 | P | 0.200 | 0.715  |
| VES  | 2007 | 18 | 22 | 43 | 16.548 | P | 0.200 | 1.614  |
| S06C | 2007 | 18 | 22 | 43 | 17.153 | P | 0.200 | 0.521  |
| K05A | 2007 | 18 | 22 | 43 | 17.176 | P | 0.200 | 0.167  |
| SN63 | 2007 | 18 | 22 | 43 | 17.212 | P | 0.200 | 0.448  |
| R05C | 2007 | 18 | 22 | 43 | 17.218 | P | 0.200 | 0.105  |
| SN85 | 2007 | 18 | 22 | 43 | 17.502 | P | 0.200 | 0.583  |
| SN96 | 2007 | 18 | 22 | 43 | 17.542 | P | 0.200 | 0.448  |
| ELFS | 2007 | 18 | 22 | 43 | 17.631 | P | 0.200 | -0.596 |
| L05A | 2007 | 18 | 22 | 43 | 17.863 | P | 0.200 | 0.574  |
| J05A | 2007 | 18 | 22 | 43 | 18.139 | P | 0.200 | 0.078  |
| SN84 | 2007 | 18 | 22 | 43 | 18.312 | P | 0.200 | 0.379  |
| SN95 | 2007 | 18 | 22 | 43 | 18.654 | P | 0.200 | 0.361  |
| SNA5 | 2007 | 18 | 22 | 43 | 18.787 | P | 0.200 | 0.439  |
| CMB  | 2007 | 18 | 22 | 43 | 19.206 | P | 0.200 | 0.066  |
| M05C | 2007 | 18 | 22 | 43 | 19.422 | P | 0.200 | 0.059  |
| SNA4 | 2007 | 18 | 22 | 43 | 19.688 | P | 0.200 | 0.265  |
| SNC5 | 2007 | 18 | 22 | 43 | 19.758 | P | 0.200 | -0.179 |
| SNE6 | 2007 | 18 | 22 | 43 | 19.784 | P | 0.200 | -0.124 |
| SND5 | 2007 | 18 | 22 | 43 | 20.061 | P | 0.200 | -0.581 |

|      |      |    |    |    |        |   |       |        |
|------|------|----|----|----|--------|---|-------|--------|
| LAVA | 2007 | 18 | 22 | 43 | 20.134 | P | 0.200 | -0.067 |
| SNF6 | 2007 | 18 | 22 | 43 | 20.577 | P | 0.200 | -0.383 |
| SNA3 | 2007 | 18 | 22 | 43 | 20.692 | P | 0.200 | 0.332  |
| K04A | 2007 | 18 | 22 | 43 | 20.839 | P | 0.200 | -0.160 |
| SNG7 | 2007 | 18 | 22 | 43 | 20.923 | P | 0.200 | -0.002 |
| MPP  | 2007 | 18 | 22 | 43 | 20.939 | P | 0.200 | 0.861  |
| SNE5 | 2007 | 18 | 22 | 43 | 21.048 | P | 0.200 | -0.461 |
| SND4 | 2007 | 18 | 22 | 43 | 21.312 | P | 0.200 | -0.517 |
| HATC | 2007 | 18 | 22 | 43 | 21.392 | P | 0.200 | -0.060 |
| SNB3 | 2007 | 18 | 22 | 43 | 21.651 | P | 0.200 | 0.202  |
| J04A | 2007 | 18 | 22 | 43 | 21.912 | P | 0.200 | -0.371 |
| I04A | 2007 | 18 | 22 | 43 | 21.935 | P | 0.200 | -1.025 |
| SNE4 | 2007 | 18 | 22 | 43 | 21.968 | P | 0.200 | -0.509 |
| L04A | 2007 | 18 | 22 | 43 | 21.974 | P | 0.200 | -0.237 |
| R04C | 2007 | 18 | 22 | 43 | 22.268 | P | 0.200 | 0.698  |
| M04C | 2007 | 18 | 22 | 43 | 22.321 | P | 0.200 | -0.073 |
| SNG5 | 2007 | 18 | 22 | 43 | 22.374 | P | 0.200 | -0.581 |
| SNC3 | 2007 | 18 | 22 | 43 | 22.564 | P | 0.200 | 0.210  |
| ORV  | 2007 | 18 | 22 | 43 | 22.573 | P | 0.200 | -0.372 |
| U04C | 2007 | 18 | 22 | 43 | 22.949 | P | 0.200 | -0.203 |
| SUTB | 2007 | 18 | 22 | 43 | 24.185 | P | 0.200 | -0.459 |
| PHL  | 2007 | 18 | 22 | 43 | 24.499 | P | 0.200 | 1.476  |
| YBH  | 2007 | 18 | 22 | 43 | 24.901 | P | 0.200 | -1.615 |
| M02C | 2007 | 18 | 22 | 43 | 26.193 | P | 0.200 | -1.369 |
| DBO  | 2007 | 18 | 22 | 43 | 26.640 | P | 0.200 | -0.876 |
| MHC  | 2007 | 18 | 22 | 43 | 27.019 | P | 0.200 | 0.703  |

|      |      |     |   |         |         |           |         |        |       |
|------|------|-----|---|---------|---------|-----------|---------|--------|-------|
| 2006 | 311  | 6   | 6 | 54.2002 | 2.03800 | -32.37300 | 10.0000 | 238    | 0.006 |
| V11A | 2006 | 311 | 6 | 19      | 21.507  | P         | 0.200   | 0.473  |       |
| Q11A | 2006 | 311 | 6 | 19      | 22.253  | P         | 0.200   | -0.284 |       |
| TUQ  | 2006 | 311 | 6 | 19      | 23.386  | P         | 0.200   | 0.323  |       |
| SHO  | 2006 | 311 | 6 | 19      | 24.778  | P         | 0.200   | 0.364  |       |
| HEC  | 2006 | 311 | 6 | 19      | 25.249  | P         | 0.200   | 0.548  |       |
| R10A | 2006 | 311 | 6 | 19      | 25.471  | P         | 0.200   | 0.408  |       |
| U10A | 2006 | 311 | 6 | 19      | 25.641  | P         | 0.200   | 0.774  |       |
| P10A | 2006 | 311 | 6 | 19      | 26.469  | P         | 0.200   | 0.530  |       |
| GSC  | 2006 | 311 | 6 | 19      | 26.927  | P         | 0.200   | 0.226  |       |
| BBR  | 2006 | 311 | 6 | 19      | 27.671  | P         | 0.200   | 0.484  |       |
| FUR  | 2006 | 311 | 6 | 19      | 27.727  | P         | 0.200   | 0.818  |       |
| SVD  | 2006 | 311 | 6 | 19      | 28.094  | P         | 0.200   | 0.449  |       |
| R09A | 2006 | 311 | 6 | 19      | 28.174  | P         | 0.200   | -0.025 |       |
| P09A | 2006 | 311 | 6 | 19      | 28.288  | P         | 0.200   | -0.393 |       |
| TPH  | 2006 | 311 | 6 | 19      | 28.697  | P         | 0.200   | -0.107 |       |
| S09A | 2006 | 311 | 6 | 19      | 28.808  | P         | 0.200   | 0.060  |       |
| SLA  | 2006 | 311 | 6 | 19      | 28.863  | P         | 0.200   | 0.218  |       |
| BMN  | 2006 | 311 | 6 | 19      | 28.940  | P         | 0.200   | -0.096 |       |
| O09A | 2006 | 311 | 6 | 19      | 28.979  | P         | 0.200   | 0.081  |       |
| BFS  | 2006 | 311 | 6 | 19      | 29.290  | P         | 0.200   | -0.926 |       |
| GRA  | 2006 | 311 | 6 | 19      | 29.531  | P         | 0.200   | 0.426  |       |
| MPM  | 2006 | 311 | 6 | 19      | 29.969  | P         | 0.200   | 0.229  |       |
| LRL  | 2006 | 311 | 6 | 19      | 30.497  | P         | 0.200   | 0.129  |       |
| Q08A | 2006 | 311 | 6 | 19      | 30.725  | P         | 0.200   | -0.807 |       |
| CHF  | 2006 | 311 | 6 | 19      | 31.365  | P         | 0.200   | -0.371 |       |
| EDW2 | 2006 | 311 | 6 | 19      | 31.522  | P         | 0.200   | -0.016 |       |
| MWC  | 2006 | 311 | 6 | 19      | 31.592  | P         | 0.200   | -0.255 |       |
| VCS  | 2006 | 311 | 6 | 19      | 31.803  | P         | 0.200   | -0.300 |       |
| R08A | 2006 | 311 | 6 | 19      | 32.006  | P         | 0.200   | -0.269 |       |
| CWC  | 2006 | 311 | 6 | 19      | 32.240  | P         | 0.200   | 0.232  |       |
| N08A | 2006 | 311 | 6 | 19      | 32.352  | P         | 0.200   | -0.240 |       |
| S08C | 2006 | 311 | 6 | 19      | 33.087  | P         | 0.200   | 0.346  |       |
| ISA  | 2006 | 311 | 6 | 19      | 34.073  | P         | 0.200   | 0.525  |       |
| OSI  | 2006 | 311 | 6 | 19      | 34.288  | P         | 0.200   | -0.141 |       |
| O07A | 2006 | 311 | 6 | 19      | 34.704  | P         | 0.200   | -0.520 |       |

|      |      |     |   |    |        |   |       |        |
|------|------|-----|---|----|--------|---|-------|--------|
| N07B | 2006 | 311 | 6 | 19 | 35.243 | P | 0.200 | -0.450 |
| HELL | 2006 | 311 | 6 | 19 | 35.358 | P | 0.200 | -0.368 |
| RCT  | 2006 | 311 | 6 | 19 | 35.424 | P | 0.200 | -1.123 |
| ARV  | 2006 | 311 | 6 | 19 | 35.438 | P | 0.200 | 0.600  |
| MLAC | 2006 | 311 | 6 | 19 | 35.661 | P | 0.200 | 0.459  |
| R07C | 2006 | 311 | 6 | 19 | 36.352 | P | 0.200 | 0.387  |
| M07A | 2006 | 311 | 6 | 19 | 36.469 | P | 0.200 | 0.037  |
| SN43 | 2006 | 311 | 6 | 19 | 37.637 | P | 0.200 | -0.125 |
| SNA8 | 2006 | 311 | 6 | 19 | 38.361 | P | 0.200 | 0.161  |
| L07A | 2006 | 311 | 6 | 19 | 37.818 | P | 0.200 | 0.687  |
| R06C | 2006 | 311 | 6 | 19 | 38.174 | P | 0.200 | 0.611  |
| SN97 | 2006 | 311 | 6 | 19 | 39.584 | P | 0.200 | 0.692  |
| N06A | 2006 | 311 | 6 | 19 | 38.602 | P | 0.200 | -0.252 |
| O06A | 2006 | 311 | 6 | 19 | 38.621 | P | 0.200 | -0.208 |
| SNA7 | 2006 | 311 | 6 | 19 | 39.822 | P | 0.200 | 0.448  |
| WCN  | 2006 | 311 | 6 | 19 | 38.898 | P | 0.200 | 0.163  |
| S06C | 2006 | 311 | 6 | 19 | 39.150 | P | 0.200 | 0.162  |
| SND8 | 2006 | 311 | 6 | 19 | 40.357 | P | 0.200 | -0.107 |
| SNB7 | 2006 | 311 | 6 | 19 | 40.754 | P | 0.200 | 0.535  |
| SNE9 | 2006 | 311 | 6 | 19 | 40.013 | P | 0.200 | -0.237 |
| SNC7 | 2006 | 311 | 6 | 19 | 41.275 | P | 0.200 | 0.060  |
| SN96 | 2006 | 311 | 6 | 19 | 40.286 | P | 0.200 | 0.480  |
| R05C | 2006 | 311 | 6 | 19 | 40.309 | P | 0.200 | 0.237  |
| SNF9 | 2006 | 311 | 6 | 19 | 40.538 | P | 0.200 | -0.504 |
| SNA4 | 2006 | 311 | 6 | 19 | 41.554 | P | 0.200 | -0.031 |
| SND7 | 2006 | 311 | 6 | 19 | 41.665 | P | 0.200 | -0.124 |
| BEK  | 2006 | 311 | 6 | 19 | 40.752 | P | 0.200 | -0.116 |
| S05C | 2006 | 311 | 6 | 19 | 40.762 | P | 0.200 | 0.121  |
| CMB  | 2006 | 311 | 6 | 19 | 40.907 | P | 0.200 | -0.105 |
| PKD  | 2006 | 311 | 6 | 19 | 40.990 | P | 0.200 | -0.765 |
| SNC5 | 2006 | 311 | 6 | 19 | 42.150 | P | 0.200 | -0.220 |
| SNA3 | 2006 | 311 | 6 | 19 | 42.315 | P | 0.200 | 0.122  |
| SNE6 | 2006 | 311 | 6 | 19 | 42.421 | P | 0.200 | -0.242 |
| SND5 | 2006 | 311 | 6 | 19 | 42.552 | P | 0.200 | -0.419 |
| M06C | 2006 | 311 | 6 | 19 | 41.556 | P | 0.200 | 0.332  |
| SNC4 | 2006 | 311 | 6 | 19 | 42.691 | P | 0.200 | -0.308 |
| SN93 | 2006 | 311 | 6 | 19 | 41.781 | P | 0.200 | 0.026  |
| P05C | 2006 | 311 | 6 | 19 | 41.946 | P | 0.200 | 0.038  |
| ELFS | 2006 | 311 | 6 | 19 | 42.137 | P | 0.200 | -0.135 |
| SNE5 | 2006 | 311 | 6 | 19 | 43.192 | P | 0.200 | -0.559 |
| SNB3 | 2006 | 311 | 6 | 19 | 43.210 | P | 0.200 | 0.113  |
| LAVA | 2006 | 311 | 6 | 19 | 42.261 | P | 0.200 | -0.071 |
| O05C | 2006 | 311 | 6 | 19 | 42.710 | P | 0.200 | -0.117 |
| L05A | 2006 | 311 | 6 | 19 | 42.860 | P | 0.200 | 0.360  |
| SNE4 | 2006 | 311 | 6 | 19 | 43.930 | P | 0.200 | -0.503 |
| O04C | 2006 | 311 | 6 | 19 | 43.103 | P | 0.200 | -0.465 |
| SNG5 | 2006 | 311 | 6 | 19 | 44.200 | P | 0.200 | -0.925 |
| R04C | 2006 | 311 | 6 | 19 | 43.324 | P | 0.200 | 0.376  |
| SND4 | 2006 | 311 | 6 | 19 | 43.393 | P | 0.200 | -0.320 |
| SNC3 | 2006 | 311 | 6 | 19 | 44.313 | P | 0.200 | 0.395  |
| ORV  | 2006 | 311 | 6 | 19 | 44.316 | P | 0.200 | -0.576 |
| HATC | 2006 | 311 | 6 | 19 | 44.422 | P | 0.200 | -0.322 |
| S04C | 2006 | 311 | 6 | 19 | 44.746 | P | 0.200 | 0.297  |
| PACP | 2006 | 311 | 6 | 19 | 44.782 | P | 0.200 | 0.309  |
| Q04C | 2006 | 311 | 6 | 19 | 45.172 | P | 0.200 | 0.601  |
| MHC  | 2006 | 311 | 6 | 19 | 46.294 | P | 0.200 | 0.477  |
| M03C | 2006 | 311 | 6 | 19 | 46.383 | P | 0.200 | -0.655 |
| YBH  | 2006 | 311 | 6 | 19 | 47.848 | P | 0.200 | -1.259 |
| O02C | 2006 | 311 | 6 | 19 | 48.451 | P | 0.200 | -1.105 |
| P01C | 2006 | 311 | 6 | 19 | 52.242 | P | 0.200 | 0.540  |

|      |      |     |    |         |          |           |         |       |        |
|------|------|-----|----|---------|----------|-----------|---------|-------|--------|
| 2006 | 210  | 19  | 53 | 44.7775 | 23.58900 | -63.92300 | 10.0000 | 202   | -0.006 |
| TUQ  | 2006 | 210 | 20 | 2       | 10.941   | P         | 0.200   | 0.315 |        |



|      |      |     |    |   |        |   |       |        |
|------|------|-----|----|---|--------|---|-------|--------|
| SHO  | 2006 | 210 | 20 | 2 | 13.300 | P | 0.200 | 0.569  |
| HEC  | 2006 | 210 | 20 | 2 | 13.460 | P | 0.200 | 0.232  |
| TPNV | 2006 | 210 | 20 | 2 | 13.654 | P | 0.200 | 0.794  |
| U10A | 2006 | 210 | 20 | 2 | 14.132 | P | 0.200 | 0.995  |
| R10A | 2006 | 210 | 20 | 2 | 14.489 | P | 0.200 | 0.999  |
| P10A | 2006 | 210 | 20 | 2 | 15.395 | P | 0.200 | 0.426  |
| GSC  | 2006 | 210 | 20 | 2 | 16.486 | P | 0.200 | 0.301  |
| FUR  | 2006 | 210 | 20 | 2 | 17.047 | P | 0.200 | 0.623  |
| R09A | 2006 | 210 | 20 | 2 | 18.547 | P | 0.200 | 0.281  |
| SVD  | 2006 | 210 | 20 | 2 | 18.807 | P | 0.200 | 0.579  |
| Q09A | 2006 | 210 | 20 | 2 | 19.299 | P | 0.200 | 0.199  |
| S09A | 2006 | 210 | 20 | 2 | 19.364 | P | 0.200 | 0.280  |
| TPH  | 2006 | 210 | 20 | 2 | 19.528 | P | 0.200 | 0.365  |
| SLA  | 2006 | 210 | 20 | 2 | 19.584 | P | 0.200 | 0.377  |
| P09A | 2006 | 210 | 20 | 2 | 19.772 | P | 0.200 | 0.705  |
| O09A | 2006 | 210 | 20 | 2 | 20.063 | P | 0.200 | 0.395  |
| GRA  | 2006 | 210 | 20 | 2 | 20.335 | P | 0.200 | 0.604  |
| MPM  | 2006 | 210 | 20 | 2 | 21.175 | P | 0.200 | 0.529  |
| LRL  | 2006 | 210 | 20 | 2 | 21.837 | P | 0.200 | -0.024 |
| BFS  | 2006 | 210 | 20 | 2 | 21.879 | P | 0.200 | -0.095 |
| Q08A | 2006 | 210 | 20 | 2 | 23.344 | P | 0.200 | -0.225 |
| CHF  | 2006 | 210 | 20 | 2 | 24.355 | P | 0.200 | 0.023  |
| MWC  | 2006 | 210 | 20 | 2 | 24.545 | P | 0.200 | -0.031 |
| VCS  | 2006 | 210 | 20 | 2 | 24.751 | P | 0.200 | -0.027 |
| CWC  | 2006 | 210 | 20 | 2 | 24.863 | P | 0.200 | 0.597  |
| PAS  | 2006 | 210 | 20 | 2 | 24.891 | P | 0.200 | -0.263 |
| P08A | 2006 | 210 | 20 | 2 | 24.898 | P | 0.200 | 0.215  |
| R08A | 2006 | 210 | 20 | 2 | 24.931 | P | 0.200 | 0.403  |
| O08A | 2006 | 210 | 20 | 2 | 25.178 | P | 0.200 | -0.356 |
| N08A | 2006 | 210 | 20 | 2 | 25.577 | P | 0.200 | 0.075  |
| DEC  | 2006 | 210 | 20 | 2 | 25.896 | P | 0.200 | -0.292 |
| TIN  | 2006 | 210 | 20 | 2 | 25.942 | P | 0.200 | 0.807  |
| S08C | 2006 | 210 | 20 | 2 | 25.955 | P | 0.200 | 0.851  |
| SN48 | 2006 | 210 | 20 | 2 | 27.594 | P | 0.200 | 0.276  |
| DJJ  | 2006 | 210 | 20 | 2 | 26.819 | P | 0.200 | -0.138 |
| CIA  | 2006 | 210 | 20 | 2 | 27.324 | P | 0.200 | 0.356  |
| ISA  | 2006 | 210 | 20 | 2 | 27.350 | P | 0.200 | 0.601  |
| TOV  | 2006 | 210 | 20 | 2 | 28.880 | P | 0.200 | -0.424 |
| SN24 | 2006 | 210 | 20 | 2 | 30.159 | P | 0.200 | 0.255  |
| SN57 | 2006 | 210 | 20 | 2 | 30.464 | P | 0.200 | 0.597  |
| O07A | 2006 | 210 | 20 | 2 | 29.527 | P | 0.200 | -0.062 |
| ARV  | 2006 | 210 | 20 | 2 | 29.646 | P | 0.200 | 0.627  |
| SN34 | 2006 | 210 | 20 | 2 | 30.811 | P | 0.200 | 0.377  |
| SN11 | 2006 | 210 | 20 | 2 | 30.223 | P | 0.200 | -1.493 |
| HELL | 2006 | 210 | 20 | 2 | 30.343 | P | 0.200 | 0.288  |
| SN45 | 2006 | 210 | 20 | 2 | 31.388 | P | 0.200 | 0.803  |
| SN23 | 2006 | 210 | 20 | 2 | 31.542 | P | 0.200 | 0.213  |
| SN21 | 2006 | 210 | 20 | 2 | 31.747 | P | 0.200 | -1.173 |
| SN56 | 2006 | 210 | 20 | 2 | 31.827 | P | 0.200 | 0.614  |
| VES  | 2006 | 210 | 20 | 2 | 30.887 | P | 0.200 | 0.475  |
| R07C | 2006 | 210 | 20 | 2 | 30.945 | P | 0.200 | 0.637  |
| SN44 | 2006 | 210 | 20 | 2 | 32.181 | P | 0.200 | 0.438  |
| SN55 | 2006 | 210 | 20 | 2 | 32.761 | P | 0.200 | 0.604  |
| SN43 | 2006 | 210 | 20 | 2 | 33.233 | P | 0.200 | 0.198  |
| SN54 | 2006 | 210 | 20 | 2 | 33.649 | P | 0.200 | 0.531  |
| L07A | 2006 | 210 | 20 | 2 | 32.799 | P | 0.200 | -0.326 |
| T06C | 2006 | 210 | 20 | 2 | 33.077 | P | 0.200 | -0.992 |
| SN52 | 2006 | 210 | 20 | 2 | 34.195 | P | 0.200 | -0.552 |
| R06C | 2006 | 210 | 20 | 2 | 33.269 | P | 0.200 | 0.506  |
| SN64 | 2006 | 210 | 20 | 2 | 34.613 | P | 0.200 | 0.583  |
| SN76 | 2006 | 210 | 20 | 2 | 34.082 | P | 0.200 | 0.903  |
| SN51 | 2006 | 210 | 20 | 2 | 35.631 | P | 0.200 | -0.560 |
| N06A | 2006 | 210 | 20 | 2 | 34.854 | P | 0.200 | -0.533 |

|      |      |     |    |   |        |   |       |        |
|------|------|-----|----|---|--------|---|-------|--------|
| O06A | 2006 | 210 | 20 | 2 | 34.893 | P | 0.200 | -0.285 |
| V05C | 2006 | 210 | 20 | 2 | 35.011 | P | 0.200 | -0.485 |
| SN74 | 2006 | 210 | 20 | 2 | 36.232 | P | 0.200 | 0.604  |
| S06C | 2006 | 210 | 20 | 2 | 35.733 | P | 0.200 | 0.666  |
| SN73 | 2006 | 210 | 20 | 2 | 36.968 | P | 0.200 | 0.343  |
| MPP  | 2006 | 210 | 20 | 2 | 36.141 | P | 0.200 | 0.633  |
| U05C | 2006 | 210 | 20 | 2 | 36.249 | P | 0.200 | -0.489 |
| SN84 | 2006 | 210 | 20 | 2 | 37.373 | P | 0.200 | 0.468  |
| R05C | 2006 | 210 | 20 | 2 | 36.818 | P | 0.200 | 0.215  |
| SMM  | 2006 | 210 | 20 | 2 | 36.839 | P | 0.200 | 0.536  |
| SN71 | 2006 | 210 | 20 | 2 | 38.140 | P | 0.200 | -0.128 |
| BEK  | 2006 | 210 | 20 | 2 | 37.430 | P | 0.200 | -0.844 |
| PKD  | 2006 | 210 | 20 | 2 | 38.331 | P | 0.200 | -1.164 |
| M06C | 2006 | 210 | 20 | 2 | 38.344 | P | 0.200 | -0.899 |
| CMB  | 2006 | 210 | 20 | 2 | 38.414 | P | 0.200 | 0.225  |
| P05C | 2006 | 210 | 20 | 2 | 39.165 | P | 0.200 | -0.552 |
| PHL  | 2006 | 210 | 20 | 2 | 39.421 | P | 0.200 | -0.228 |
| SDP  | 2006 | 210 | 20 | 2 | 40.068 | P | 0.200 | 0.314  |
| LAVA | 2006 | 210 | 20 | 2 | 40.213 | P | 0.200 | -0.123 |
| T05C | 2006 | 210 | 20 | 2 | 40.270 | P | 0.200 | 0.322  |
| U04C | 2006 | 210 | 20 | 2 | 40.399 | P | 0.200 | -0.509 |
| O05C | 2006 | 210 | 20 | 2 | 40.652 | P | 0.200 | -0.786 |
| L05A | 2006 | 210 | 20 | 2 | 41.105 | P | 0.200 | -0.496 |
| R04C | 2006 | 210 | 20 | 2 | 42.190 | P | 0.200 | 0.781  |
| V03C | 2006 | 210 | 20 | 2 | 43.162 | P | 0.200 | -0.562 |
| M05C | 2006 | 210 | 20 | 2 | 43.297 | P | 0.200 | 0.232  |
| J05A | 2006 | 210 | 20 | 2 | 43.911 | P | 0.200 | -0.416 |
| S04C | 2006 | 210 | 20 | 2 | 44.061 | P | 0.200 | 0.252  |
| PACP | 2006 | 210 | 20 | 2 | 44.110 | P | 0.200 | 0.315  |
| ORV  | 2006 | 210 | 20 | 2 | 44.655 | P | 0.200 | -0.036 |
| SAO  | 2006 | 210 | 20 | 2 | 44.835 | P | 0.200 | 0.090  |
| HAST | 2006 | 210 | 20 | 2 | 45.121 | P | 0.200 | -0.447 |
| SUTB | 2006 | 210 | 20 | 2 | 45.766 | P | 0.200 | -0.608 |
| MHC  | 2006 | 210 | 20 | 2 | 46.428 | P | 0.200 | 0.531  |
| O03C | 2006 | 210 | 20 | 2 | 46.653 | P | 0.200 | -1.151 |
| M04C | 2006 | 210 | 20 | 2 | 47.022 | P | 0.200 | -0.067 |
| L04A | 2006 | 210 | 20 | 2 | 47.217 | P | 0.200 | -0.309 |
| WENL | 2006 | 210 | 20 | 2 | 47.407 | P | 0.200 | 1.010  |
| BDM  | 2006 | 210 | 20 | 2 | 47.946 | P | 0.200 | 0.943  |
| M03C | 2006 | 210 | 20 | 2 | 47.955 | P | 0.200 | -0.606 |
| WDC  | 2006 | 210 | 20 | 2 | 48.350 | P | 0.200 | -2.444 |
| Q03C | 2006 | 210 | 20 | 2 | 49.138 | P | 0.200 | 1.377  |
| BKS  | 2006 | 210 | 20 | 2 | 49.504 | P | 0.200 | 0.294  |
| BRK  | 2006 | 210 | 20 | 2 | 49.555 | P | 0.200 | 0.191  |
| JRSC | 2006 | 210 | 20 | 2 | 49.676 | P | 0.200 | 0.334  |
| YBH  | 2006 | 210 | 20 | 2 | 50.136 | P | 0.200 | -1.839 |
| O02C | 2006 | 210 | 20 | 2 | 50.147 | P | 0.200 | -2.103 |
| CVS  | 2006 | 210 | 20 | 2 | 50.634 | P | 0.200 | 0.221  |
| M02C | 2006 | 210 | 20 | 2 | 50.990 | P | 0.200 | -1.733 |
| MNRC | 2006 | 210 | 20 | 2 | 51.221 | P | 0.200 | 0.895  |
| HUMO | 2006 | 210 | 20 | 2 | 51.626 | P | 0.200 | -1.767 |
| DBO  | 2006 | 210 | 20 | 2 | 53.972 | P | 0.200 | -1.176 |
| I03A | 2006 | 210 | 20 | 2 | 54.211 | P | 0.200 | -1.236 |
| K02A | 2006 | 210 | 20 | 2 | 54.780 | P | 0.200 | -1.652 |
| HOPS | 2006 | 210 | 20 | 2 | 55.018 | P | 0.200 | 1.092  |
| L02A | 2006 | 210 | 20 | 2 | 55.343 | P | 0.200 | -1.518 |
| J02A | 2006 | 210 | 20 | 2 | 55.777 | P | 0.200 | -1.088 |
| O01C | 2006 | 210 | 20 | 2 | 58.670 | P | 0.200 | 0.606  |
| M01C | 2006 | 210 | 20 | 2 | 58.933 | P | 0.200 | -0.698 |
| K01A | 2006 | 210 | 20 | 3 | 1.763  | P | 0.200 | 0.099  |

|      |      |     |    |         |          |           |         |       |        |
|------|------|-----|----|---------|----------|-----------|---------|-------|--------|
| 2006 | 226  | 13  | 9  | 33.8954 | 19.02200 | -64.63600 | 21.4000 | 207   | -0.008 |
| TUQ  | 2006 | 226 | 13 | 18      | 11.261   | P         | 0.200   | 0.481 |        |

|      |      |     |    |    |        |   |       |        |
|------|------|-----|----|----|--------|---|-------|--------|
| HEC  | 2006 | 226 | 13 | 18 | 13.595 | P | 0.200 | 0.792  |
| SHO  | 2006 | 226 | 13 | 18 | 13.888 | P | 0.200 | 0.710  |
| R10A | 2006 | 226 | 13 | 18 | 16.713 | P | 0.200 | 0.964  |
| GSC  | 2006 | 226 | 13 | 18 | 16.737 | P | 0.200 | 0.590  |
| BBR  | 2006 | 226 | 13 | 18 | 17.344 | P | 0.200 | 0.987  |
| FUR  | 2006 | 226 | 13 | 18 | 17.996 | P | 0.200 | 0.750  |
| SVD  | 2006 | 226 | 13 | 18 | 18.233 | P | 0.200 | 1.058  |
| P10A | 2006 | 226 | 13 | 18 | 18.381 | P | 0.200 | 0.165  |
| SLA  | 2006 | 226 | 13 | 18 | 19.933 | P | 0.200 | 0.398  |
| R09A | 2006 | 226 | 13 | 18 | 20.708 | P | 0.200 | 0.307  |
| S09A | 2006 | 226 | 13 | 18 | 20.916 | P | 0.200 | 0.126  |
| BFS  | 2006 | 226 | 13 | 18 | 21.250 | P | 0.200 | 0.304  |
| TPH  | 2006 | 226 | 13 | 18 | 21.393 | P | 0.200 | 0.270  |
| GRA  | 2006 | 226 | 13 | 18 | 21.467 | P | 0.200 | 0.570  |
| MPM  | 2006 | 226 | 13 | 18 | 21.525 | P | 0.200 | 0.482  |
| Q09A | 2006 | 226 | 13 | 18 | 21.833 | P | 0.200 | 0.192  |
| LRL  | 2006 | 226 | 13 | 18 | 22.018 | P | 0.200 | 0.225  |
| P09A | 2006 | 226 | 13 | 18 | 22.188 | P | 0.200 | 0.075  |
| O09A | 2006 | 226 | 13 | 18 | 23.316 | P | 0.200 | 0.144  |
| CHF  | 2006 | 226 | 13 | 18 | 23.612 | P | 0.200 | 0.263  |
| EDW2 | 2006 | 226 | 13 | 18 | 23.699 | P | 0.200 | 0.381  |
| MWC  | 2006 | 226 | 13 | 18 | 23.764 | P | 0.200 | 0.268  |
| VCS  | 2006 | 226 | 13 | 18 | 24.115 | P | 0.200 | 0.237  |
| PAS  | 2006 | 226 | 13 | 18 | 24.140 | P | 0.200 | 0.153  |
| DEC  | 2006 | 226 | 13 | 18 | 25.061 | P | 0.200 | -0.033 |
| FMP  | 2006 | 226 | 13 | 18 | 25.078 | P | 0.200 | 0.510  |
| CWC  | 2006 | 226 | 13 | 18 | 25.676 | P | 0.200 | 0.765  |
| Q08A | 2006 | 226 | 13 | 18 | 25.724 | P | 0.200 | -0.261 |
| RPV  | 2006 | 226 | 13 | 18 | 25.788 | P | 0.200 | 0.588  |
| CIA  | 2006 | 226 | 13 | 18 | 25.871 | P | 0.200 | 0.628  |
| DJJ  | 2006 | 226 | 13 | 18 | 25.957 | P | 0.200 | 0.197  |
| R08A | 2006 | 226 | 13 | 18 | 26.710 | P | 0.200 | 0.121  |
| S08C | 2006 | 226 | 13 | 18 | 27.248 | P | 0.200 | 0.751  |
| OSI  | 2006 | 226 | 13 | 18 | 27.615 | P | 0.200 | -0.099 |
| ISA  | 2006 | 226 | 13 | 18 | 27.626 | P | 0.200 | 0.868  |
| P08A | 2006 | 226 | 13 | 18 | 27.655 | P | 0.200 | -0.047 |
| TOV  | 2006 | 226 | 13 | 18 | 28.172 | P | 0.200 | 0.102  |
| O08A | 2006 | 226 | 13 | 18 | 28.494 | P | 0.200 | -0.459 |
| N08A | 2006 | 226 | 13 | 18 | 29.142 | P | 0.200 | -0.107 |
| ARV  | 2006 | 226 | 13 | 18 | 29.226 | P | 0.200 | 0.668  |
| LGU  | 2006 | 226 | 13 | 18 | 29.792 | P | 0.200 | 0.202  |
| SN24 | 2006 | 226 | 13 | 18 | 31.179 | P | 0.200 | 0.157  |
| VES  | 2006 | 226 | 13 | 18 | 30.926 | P | 0.200 | 0.490  |
| SN34 | 2006 | 226 | 13 | 18 | 31.950 | P | 0.200 | 0.333  |
| Q07A | 2006 | 226 | 13 | 18 | 31.026 | P | 0.200 | -0.221 |
| HELL | 2006 | 226 | 13 | 18 | 31.114 | P | 0.200 | 0.369  |
| SN45 | 2006 | 226 | 13 | 18 | 32.637 | P | 0.200 | 0.633  |
| O07A | 2006 | 226 | 13 | 18 | 32.129 | P | 0.200 | -0.657 |
| SN56 | 2006 | 226 | 13 | 18 | 33.376 | P | 0.200 | 0.586  |
| R07C | 2006 | 226 | 13 | 18 | 32.544 | P | 0.200 | 0.560  |
| SN55 | 2006 | 226 | 13 | 18 | 34.069 | P | 0.200 | 0.376  |
| SN43 | 2006 | 226 | 13 | 18 | 34.131 | P | 0.200 | -0.033 |
| SCZ2 | 2006 | 226 | 13 | 18 | 33.161 | P | 0.200 | 0.006  |
| N07B | 2006 | 226 | 13 | 18 | 33.574 | P | 0.200 | -0.403 |
| SBC  | 2006 | 226 | 13 | 18 | 33.759 | P | 0.200 | 0.050  |
| T06C | 2006 | 226 | 13 | 18 | 33.800 | P | 0.200 | -1.114 |
| SN54 | 2006 | 226 | 13 | 18 | 34.827 | P | 0.200 | 0.342  |
| SN64 | 2006 | 226 | 13 | 18 | 35.866 | P | 0.200 | 0.402  |
| V05C | 2006 | 226 | 13 | 18 | 35.125 | P | 0.200 | -0.377 |
| R06C | 2006 | 226 | 13 | 18 | 35.272 | P | 0.200 | 0.569  |
| MPP  | 2006 | 226 | 13 | 18 | 35.290 | P | 0.200 | 0.529  |
| SN76 | 2006 | 226 | 13 | 18 | 35.510 | P | 0.200 | 0.492  |
| M07A | 2006 | 226 | 13 | 18 | 35.526 | P | 0.200 | -0.307 |

|      |      |     |    |    |        |   |       |        |
|------|------|-----|----|----|--------|---|-------|--------|
| SN74 | 2006 | 226 | 13 | 18 | 37.433 | P | 0.200 | 0.320  |
| SMM  | 2006 | 226 | 13 | 18 | 36.486 | P | 0.200 | 0.609  |
| SN97 | 2006 | 226 | 13 | 18 | 37.524 | P | 0.200 | 0.477  |
| S06C | 2006 | 226 | 13 | 18 | 36.920 | P | 0.200 | 0.373  |
| SNA7 | 2006 | 226 | 13 | 18 | 38.054 | P | 0.200 | 0.247  |
| SN85 | 2006 | 226 | 13 | 18 | 38.129 | P | 0.200 | 0.596  |
| L07A | 2006 | 226 | 13 | 18 | 37.142 | P | 0.200 | -0.351 |
| SNC8 | 2006 | 226 | 13 | 18 | 38.184 | P | 0.200 | -0.862 |
| P06A | 2006 | 226 | 13 | 18 | 37.198 | P | 0.200 | -1.048 |
| O06A | 2006 | 226 | 13 | 18 | 37.492 | P | 0.200 | -0.746 |
| SN84 | 2006 | 226 | 13 | 18 | 38.965 | P | 0.200 | 0.451  |
| SND8 | 2006 | 226 | 13 | 18 | 39.139 | P | 0.200 | -0.924 |
| N06A | 2006 | 226 | 13 | 18 | 38.251 | P | 0.200 | -0.579 |
| PKD  | 2006 | 226 | 13 | 18 | 38.383 | P | 0.200 | -1.059 |
| S05C | 2006 | 226 | 13 | 18 | 38.558 | P | 0.200 | -0.272 |
| SN96 | 2006 | 226 | 13 | 18 | 38.889 | P | 0.200 | 0.689  |
| R05C | 2006 | 226 | 13 | 18 | 39.007 | P | 0.200 | 0.389  |
| SNB6 | 2006 | 226 | 13 | 18 | 40.049 | P | 0.200 | 0.245  |
| PHL  | 2006 | 226 | 13 | 18 | 39.280 | P | 0.200 | 0.021  |
| SNA5 | 2006 | 226 | 13 | 18 | 40.314 | P | 0.200 | 0.415  |
| CMB  | 2006 | 226 | 13 | 18 | 39.687 | P | 0.200 | -0.001 |
| BEK  | 2006 | 226 | 13 | 18 | 39.989 | P | 0.200 | -1.037 |
| SNA4 | 2006 | 226 | 13 | 18 | 41.279 | P | 0.200 | 0.363  |
| U04C | 2006 | 226 | 13 | 18 | 40.477 | P | 0.200 | -0.669 |
| SNF8 | 2006 | 226 | 13 | 18 | 41.968 | P | 0.200 | -0.931 |
| SN93 | 2006 | 226 | 13 | 18 | 41.094 | P | 0.200 | 0.065  |
| SNA3 | 2006 | 226 | 13 | 18 | 42.108 | P | 0.200 | 0.330  |
| SNE7 | 2006 | 226 | 13 | 18 | 42.155 | P | 0.200 | -0.883 |
| SNC5 | 2006 | 226 | 13 | 18 | 42.475 | P | 0.200 | -0.129 |
| P05C | 2006 | 226 | 13 | 18 | 41.947 | P | 0.200 | -0.099 |
| M06C | 2006 | 226 | 13 | 18 | 41.994 | P | 0.200 | -0.893 |
| SNE6 | 2006 | 226 | 13 | 18 | 43.147 | P | 0.200 | -0.341 |
| SNC4 | 2006 | 226 | 13 | 18 | 43.228 | P | 0.200 | -0.269 |
| LAVA | 2006 | 226 | 13 | 18 | 42.295 | P | 0.200 | 0.031  |
| SND5 | 2006 | 226 | 13 | 18 | 43.370 | P | 0.200 | -0.309 |
| ELFS | 2006 | 226 | 13 | 18 | 42.938 | P | 0.200 | -0.857 |
| SNF6 | 2006 | 226 | 13 | 18 | 44.303 | P | 0.200 | -0.810 |
| R04C | 2006 | 226 | 13 | 18 | 43.597 | P | 0.200 | 0.607  |
| SNE5 | 2006 | 226 | 13 | 18 | 44.634 | P | 0.200 | -0.503 |
| SNC3 | 2006 | 226 | 13 | 18 | 44.147 | P | 0.200 | -0.608 |
| SNG7 | 2006 | 226 | 13 | 18 | 45.401 | P | 0.200 | -0.411 |
| SNE4 | 2006 | 226 | 13 | 18 | 45.530 | P | 0.200 | -0.466 |
| PACP | 2006 | 226 | 13 | 18 | 44.593 | P | 0.200 | 0.134  |
| S04C | 2006 | 226 | 13 | 18 | 44.840 | P | 0.200 | 0.048  |
| SAO  | 2006 | 226 | 13 | 18 | 45.126 | P | 0.200 | -0.108 |
| HAST | 2006 | 226 | 13 | 18 | 45.184 | P | 0.200 | -0.549 |
| M05C | 2006 | 226 | 13 | 18 | 45.691 | P | 0.200 | -1.058 |
| SNG5 | 2006 | 226 | 13 | 18 | 46.853 | P | 0.200 | -0.590 |
| Q04C | 2006 | 226 | 13 | 18 | 46.479 | P | 0.200 | 0.586  |
| K05A | 2006 | 226 | 13 | 18 | 46.597 | P | 0.200 | -0.241 |
| ORV  | 2006 | 226 | 13 | 18 | 46.782 | P | 0.200 | -0.277 |
| MHC  | 2006 | 226 | 13 | 18 | 47.105 | P | 0.200 | 0.340  |
| WENL | 2006 | 226 | 13 | 18 | 48.016 | P | 0.200 | 0.603  |
| SUTB | 2006 | 226 | 13 | 18 | 48.281 | P | 0.200 | -0.255 |
| J05A | 2006 | 226 | 13 | 18 | 48.791 | P | 0.200 | -0.441 |
| BDM  | 2006 | 226 | 13 | 18 | 48.873 | P | 0.200 | 0.630  |
| O03C | 2006 | 226 | 13 | 18 | 49.353 | P | 0.200 | -1.037 |
| BNLO | 2006 | 226 | 13 | 18 | 49.772 | P | 0.200 | 0.034  |
| BRIB | 2006 | 226 | 13 | 18 | 50.167 | P | 0.200 | 0.335  |
| JRSC | 2006 | 226 | 13 | 18 | 50.227 | P | 0.200 | 0.103  |
| M04C | 2006 | 226 | 13 | 18 | 50.482 | P | 0.200 | -0.413 |
| Q03C | 2006 | 226 | 13 | 18 | 50.515 | P | 0.200 | 1.076  |
| BRK  | 2006 | 226 | 13 | 18 | 50.678 | P | 0.200 | 0.222  |

|      |      |     |    |    |        |   |       |        |
|------|------|-----|----|----|--------|---|-------|--------|
| K04A | 2006 | 226 | 13 | 18 | 50.681 | P | 0.200 | -0.471 |
| WDC  | 2006 | 226 | 13 | 18 | 51.164 | P | 0.200 | -2.571 |
| L04A | 2006 | 226 | 13 | 18 | 51.173 | P | 0.200 | -0.426 |
| M03C | 2006 | 226 | 13 | 18 | 51.239 | P | 0.200 | -0.766 |
| CVS  | 2006 | 226 | 13 | 18 | 51.858 | P | 0.200 | 0.004  |
| O02C | 2006 | 226 | 13 | 18 | 52.660 | P | 0.200 | -2.208 |
| MNRC | 2006 | 226 | 13 | 18 | 52.860 | P | 0.200 | 0.778  |
| YBH  | 2006 | 226 | 13 | 18 | 53.877 | P | 0.200 | -1.751 |
| MCCM | 2006 | 226 | 13 | 18 | 54.237 | P | 0.200 | 0.050  |
| FARB | 2006 | 226 | 13 | 18 | 54.539 | P | 0.200 | -0.171 |
| M02C | 2006 | 226 | 13 | 18 | 54.539 | P | 0.200 | -1.600 |
| P01C | 2006 | 226 | 13 | 18 | 58.107 | P | 0.200 | 0.576  |
| O01C | 2006 | 226 | 13 | 19 | 0.718  | P | 0.200 | 0.176  |

|      |      |     |    |         |         |           |         |        |        |
|------|------|-----|----|---------|---------|-----------|---------|--------|--------|
| 2006 | 273  | 12  | 47 | 24.0532 | 7.28300 | -34.65800 | 10.0000 | 224    | -0.001 |
| U11A | 2006 | 273 | 12 | 59      | 24.972  | P         | 0.200   | 0.403  |        |
| V11A | 2006 | 273 | 12 | 59      | 25.060  | P         | 0.200   | 0.237  |        |
| Q11A | 2006 | 273 | 12 | 59      | 25.449  | P         | 0.200   | -0.166 |        |
| TUQ  | 2006 | 273 | 12 | 59      | 27.251  | P         | 0.200   | 0.152  |        |
| SHO  | 2006 | 273 | 12 | 59      | 28.675  | P         | 0.200   | 0.245  |        |
| R10A | 2006 | 273 | 12 | 59      | 28.954  | P         | 0.200   | 0.478  |        |
| HEC  | 2006 | 273 | 12 | 59      | 29.361  | P         | 0.200   | 0.335  |        |
| GSC  | 2006 | 273 | 12 | 59      | 31.152  | P         | 0.200   | 0.139  |        |
| FUR  | 2006 | 273 | 12 | 59      | 31.704  | P         | 0.200   | 0.750  |        |
| R09A | 2006 | 273 | 12 | 59      | 31.757  | P         | 0.200   | -0.096 |        |
| Q09A | 2006 | 273 | 12 | 59      | 31.814  | P         | 0.200   | -0.471 |        |
| P09A | 2006 | 273 | 12 | 59      | 31.972  | P         | 0.200   | -0.063 |        |
| BBR  | 2006 | 273 | 12 | 59      | 32.274  | P         | 0.200   | 0.408  |        |
| O09A | 2006 | 273 | 12 | 59      | 32.333  | P         | 0.200   | 0.202  |        |
| RRX  | 2006 | 273 | 12 | 59      | 32.366  | P         | 0.200   | 0.456  |        |
| TPH  | 2006 | 273 | 12 | 59      | 32.469  | P         | 0.200   | -0.094 |        |
| S09A | 2006 | 273 | 12 | 59      | 32.668  | P         | 0.200   | 0.073  |        |
| SVD  | 2006 | 273 | 12 | 59      | 32.797  | P         | 0.200   | 0.375  |        |
| SLA  | 2006 | 273 | 12 | 59      | 33.225  | P         | 0.200   | 0.245  |        |
| VTV  | 2006 | 273 | 12 | 59      | 33.602  | P         | 0.200   | 0.082  |        |
| GRA  | 2006 | 273 | 12 | 59      | 33.623  | P         | 0.200   | 0.453  |        |
| ADO  | 2006 | 273 | 12 | 59      | 34.268  | P         | 0.200   | 0.395  |        |
| Q08A | 2006 | 273 | 12 | 59      | 34.519  | P         | 0.200   | -0.789 |        |
| LRL  | 2006 | 273 | 12 | 59      | 34.945  | P         | 0.200   | -0.001 |        |
| P08A | 2006 | 273 | 12 | 59      | 35.622  | P         | 0.200   | -0.118 |        |
| O08A | 2006 | 273 | 12 | 59      | 35.751  | P         | 0.200   | -0.458 |        |
| N08A | 2006 | 273 | 12 | 59      | 35.802  | P         | 0.200   | -0.167 |        |
| R08A | 2006 | 273 | 12 | 59      | 35.981  | P         | 0.200   | -0.223 |        |
| CHF  | 2006 | 273 | 12 | 59      | 36.440  | P         | 0.200   | -0.291 |        |
| MWC  | 2006 | 273 | 12 | 59      | 36.658  | P         | 0.200   | -0.229 |        |
| VCS  | 2006 | 273 | 12 | 59      | 36.664  | P         | 0.200   | -0.419 |        |
| CWC  | 2006 | 273 | 12 | 59      | 36.750  | P         | 0.200   | 0.319  |        |
| PAS  | 2006 | 273 | 12 | 59      | 36.875  | P         | 0.200   | -0.384 |        |
| TIN  | 2006 | 273 | 12 | 59      | 36.929  | P         | 0.200   | 0.027  |        |
| S08C | 2006 | 273 | 12 | 59      | 37.347  | P         | 0.200   | 0.420  |        |
| DEC  | 2006 | 273 | 12 | 59      | 37.420  | P         | 0.200   | -0.565 |        |
| O07A | 2006 | 273 | 12 | 59      | 38.522  | P         | 0.200   | -0.456 |        |
| CIA  | 2006 | 273 | 12 | 59      | 38.581  | P         | 0.200   | 0.085  |        |
| ISA  | 2006 | 273 | 12 | 59      | 38.813  | P         | 0.200   | 0.504  |        |
| N07B | 2006 | 273 | 12 | 59      | 38.845  | P         | 0.200   | -0.490 |        |
| OSI  | 2006 | 273 | 12 | 59      | 39.347  | P         | 0.200   | -0.206 |        |
| TOV  | 2006 | 273 | 12 | 59      | 39.688  | P         | 0.200   | -0.444 |        |
| P07A | 2006 | 273 | 12 | 59      | 39.833  | P         | 0.200   | 0.671  |        |
| M07A | 2006 | 273 | 12 | 59      | 39.942  | P         | 0.200   | -0.042 |        |
| MLAC | 2006 | 273 | 12 | 59      | 39.989  | P         | 0.200   | 0.415  |        |
| HELL | 2006 | 273 | 12 | 59      | 40.041  | P         | 0.200   | -0.348 |        |
| VES  | 2006 | 273 | 12 | 59      | 40.108  | P         | 0.200   | -0.723 |        |
| RCT  | 2006 | 273 | 12 | 59      | 40.374  | P         | 0.200   | -0.975 |        |

|      |      |     |    |    |        |   |       |        |
|------|------|-----|----|----|--------|---|-------|--------|
| ARV  | 2006 | 273 | 12 | 59 | 40.385 | P | 0.200 | 0.518  |
| R07C | 2006 | 273 | 12 | 59 | 40.677 | P | 0.200 | 0.394  |
| SN55 | 2006 | 273 | 12 | 59 | 41.817 | P | 0.200 | 0.168  |
| L07A | 2006 | 273 | 12 | 59 | 41.201 | P | 0.200 | 0.594  |
| SN43 | 2006 | 273 | 12 | 59 | 42.266 | P | 0.200 | -0.123 |
| SNA8 | 2006 | 273 | 12 | 59 | 42.601 | P | 0.200 | 0.173  |
| T06C | 2006 | 273 | 12 | 59 | 41.913 | P | 0.200 | -1.118 |
| R06C | 2006 | 273 | 12 | 59 | 42.410 | P | 0.200 | 0.520  |
| N06A | 2006 | 273 | 12 | 59 | 42.517 | P | 0.200 | -0.253 |
| O06A | 2006 | 273 | 12 | 59 | 42.571 | P | 0.200 | -0.302 |
| SN97 | 2006 | 273 | 12 | 59 | 43.855 | P | 0.200 | 0.601  |
| SNA7 | 2006 | 273 | 12 | 59 | 44.021 | P | 0.200 | 0.334  |
| WCN  | 2006 | 273 | 12 | 59 | 43.083 | P | 0.200 | 0.127  |
| P06A | 2006 | 273 | 12 | 59 | 43.171 | P | 0.200 | -0.198 |
| SND8 | 2006 | 273 | 12 | 59 | 44.648 | P | 0.200 | -0.099 |
| V05C | 2006 | 273 | 12 | 59 | 43.649 | P | 0.200 | -0.674 |
| S06C | 2006 | 273 | 12 | 59 | 43.718 | P | 0.200 | 0.134  |
| SNB7 | 2006 | 273 | 12 | 59 | 44.971 | P | 0.200 | 0.338  |
| SNE9 | 2006 | 273 | 12 | 59 | 44.353 | P | 0.200 | -0.076 |
| U05C | 2006 | 273 | 12 | 59 | 44.484 | P | 0.200 | -0.557 |
| SNC7 | 2006 | 273 | 12 | 59 | 45.648 | P | 0.200 | 0.018  |
| SNF9 | 2006 | 273 | 12 | 59 | 44.805 | P | 0.200 | -0.443 |
| SN96 | 2006 | 273 | 12 | 59 | 44.811 | P | 0.200 | 0.484  |
| MPP  | 2006 | 273 | 12 | 59 | 44.855 | P | 0.200 | 0.417  |
| R05C | 2006 | 273 | 12 | 59 | 44.888 | P | 0.200 | 0.356  |
| BEK  | 2006 | 273 | 12 | 59 | 44.932 | P | 0.200 | -0.221 |
| SND7 | 2006 | 273 | 12 | 59 | 46.121 | P | 0.200 | -0.070 |
| SNC6 | 2006 | 273 | 12 | 59 | 46.125 | P | 0.200 | 0.224  |
| SNA4 | 2006 | 273 | 12 | 59 | 46.174 | P | 0.200 | -0.068 |
| SNB5 | 2006 | 273 | 12 | 59 | 46.370 | P | 0.200 | 0.129  |
| CMB  | 2006 | 273 | 12 | 59 | 45.499 | P | 0.200 | -0.240 |
| M06C | 2006 | 273 | 12 | 59 | 45.559 | P | 0.200 | 0.322  |
| S05C | 2006 | 273 | 12 | 59 | 45.563 | P | 0.200 | 0.025  |
| SNE7 | 2006 | 273 | 12 | 59 | 46.724 | P | 0.200 | 0.059  |
| SNA3 | 2006 | 273 | 12 | 59 | 47.020 | P | 0.200 | 0.086  |
| PKD  | 2006 | 273 | 12 | 59 | 46.180 | P | 0.200 | -0.909 |
| SNE6 | 2006 | 273 | 12 | 59 | 47.199 | P | 0.200 | 0.018  |
| SNC4 | 2006 | 273 | 12 | 59 | 47.358 | P | 0.200 | -0.357 |
| ELFS | 2006 | 273 | 12 | 59 | 46.454 | P | 0.200 | -0.020 |
| SN93 | 2006 | 273 | 12 | 59 | 46.511 | P | 0.200 | -0.018 |
| P05C | 2006 | 273 | 12 | 59 | 46.640 | P | 0.200 | 0.233  |
| K05A | 2006 | 273 | 12 | 59 | 46.838 | P | 0.200 | 0.282  |
| LAVA | 2006 | 273 | 12 | 59 | 46.883 | P | 0.200 | -0.126 |
| SNB3 | 2006 | 273 | 12 | 59 | 47.963 | P | 0.200 | 0.076  |
| L05A | 2006 | 273 | 12 | 59 | 46.985 | P | 0.200 | 0.566  |
| PHL  | 2006 | 273 | 12 | 59 | 47.171 | P | 0.200 | -0.075 |
| O05C | 2006 | 273 | 12 | 59 | 47.294 | P | 0.200 | 0.029  |
| SNE4 | 2006 | 273 | 12 | 59 | 48.584 | P | 0.200 | -0.571 |
| T05C | 2006 | 273 | 12 | 59 | 47.632 | P | 0.200 | 0.539  |
| O04C | 2006 | 273 | 12 | 59 | 47.658 | P | 0.200 | -0.321 |
| SNF6 | 2006 | 273 | 12 | 59 | 47.771 | P | 0.200 | -0.417 |
| M05C | 2006 | 273 | 12 | 59 | 47.838 | P | 0.200 | 0.086  |
| J05A | 2006 | 273 | 12 | 59 | 47.945 | P | 0.200 | 0.308  |
| U04C | 2006 | 273 | 12 | 59 | 47.958 | P | 0.200 | 0.032  |
| SND4 | 2006 | 273 | 12 | 59 | 48.037 | P | 0.200 | -0.417 |
| SNG5 | 2006 | 273 | 12 | 59 | 49.045 | P | 0.200 | -0.761 |
| R04C | 2006 | 273 | 12 | 59 | 48.086 | P | 0.200 | 0.288  |
| SNE5 | 2006 | 273 | 12 | 59 | 48.199 | P | 0.200 | -0.205 |
| SND5 | 2006 | 273 | 12 | 59 | 48.427 | P | 0.200 | 0.829  |
| RAMR | 2006 | 273 | 12 | 59 | 48.565 | P | 0.200 | 0.019  |
| ORV  | 2006 | 273 | 12 | 59 | 49.093 | P | 0.200 | -0.535 |
| SNC3 | 2006 | 273 | 12 | 59 | 49.100 | P | 0.200 | 0.363  |
| HATC | 2006 | 273 | 12 | 59 | 49.184 | P | 0.200 | 0.040  |

|      |      |     |    |    |        |   |       |        |
|------|------|-----|----|----|--------|---|-------|--------|
| K04A | 2006 | 273 | 12 | 59 | 49.568 | P | 0.200 | -0.117 |
| S04C | 2006 | 273 | 12 | 59 | 49.782 | P | 0.200 | 0.148  |
| Q04C | 2006 | 273 | 12 | 59 | 49.884 | P | 0.200 | 0.456  |
| PACP | 2006 | 273 | 12 | 59 | 50.085 | P | 0.200 | 0.319  |
| V03C | 2006 | 273 | 12 | 59 | 50.216 | P | 0.200 | 0.306  |
| M04C | 2006 | 273 | 12 | 59 | 50.245 | P | 0.200 | -0.175 |
| SAO  | 2006 | 273 | 12 | 59 | 50.482 | P | 0.200 | 0.047  |
| O03C | 2006 | 273 | 12 | 59 | 50.496 | P | 0.200 | -1.147 |
| HAST | 2006 | 273 | 12 | 59 | 50.947 | P | 0.200 | -0.196 |
| M03C | 2006 | 273 | 12 | 59 | 51.103 | P | 0.200 | -0.445 |
| WDC  | 2006 | 273 | 12 | 59 | 51.473 | P | 0.200 | -1.915 |
| MHC  | 2006 | 273 | 12 | 59 | 51.528 | P | 0.200 | 0.393  |
| WENL | 2006 | 273 | 12 | 59 | 51.893 | P | 0.200 | 0.504  |
| BDM  | 2006 | 273 | 12 | 59 | 52.213 | P | 0.200 | 0.441  |
| YBH  | 2006 | 273 | 12 | 59 | 52.245 | P | 0.200 | -1.462 |
| Q03C | 2006 | 273 | 12 | 59 | 52.916 | P | 0.200 | 0.811  |
| BRIB | 2006 | 273 | 12 | 59 | 53.082 | P | 0.200 | 0.220  |
| BKS  | 2006 | 273 | 12 | 59 | 53.287 | P | 0.200 | 0.051  |
| BRK  | 2006 | 273 | 12 | 59 | 53.340 | P | 0.200 | 0.016  |
| BNLO | 2006 | 273 | 12 | 59 | 53.370 | P | 0.200 | -0.058 |
| M02C | 2006 | 273 | 12 | 59 | 53.420 | P | 0.200 | -0.977 |
| O02C | 2006 | 273 | 12 | 59 | 53.436 | P | 0.200 | -1.112 |
| JRSC | 2006 | 273 | 12 | 59 | 53.532 | P | 0.200 | 0.087  |
| CVS  | 2006 | 273 | 12 | 59 | 53.850 | P | 0.200 | -0.042 |
| MNRC | 2006 | 273 | 12 | 59 | 54.331 | P | 0.200 | 0.599  |
| I03A | 2006 | 273 | 12 | 59 | 54.368 | P | 0.200 | -0.348 |
| DBO  | 2006 | 273 | 12 | 59 | 55.072 | P | 0.200 | -0.040 |
| GASB | 2006 | 273 | 12 | 59 | 55.508 | P | 0.200 | 0.866  |
| MCCM | 2006 | 273 | 12 | 59 | 55.813 | P | 0.200 | 0.122  |
| K02A | 2006 | 273 | 12 | 59 | 55.974 | P | 0.200 | -0.265 |
| N02C | 2006 | 273 | 12 | 59 | 56.073 | P | 0.200 | -0.280 |
| J02A | 2006 | 273 | 12 | 59 | 56.145 | P | 0.200 | 0.037  |
| L02A | 2006 | 273 | 12 | 59 | 56.692 | P | 0.200 | -0.049 |
| HOPS | 2006 | 273 | 12 | 59 | 56.822 | P | 0.200 | 0.690  |
| P01C | 2006 | 273 | 12 | 59 | 57.710 | P | 0.200 | 0.696  |
| O01C | 2006 | 273 | 12 | 59 | 59.132 | P | 0.200 | 0.608  |
| M01C | 2006 | 273 | 12 | 59 | 59.269 | P | 0.200 | 0.426  |
| JCC  | 2006 | 273 | 12 | 59 | 59.281 | P | 0.200 | 0.349  |
| K01A | 2006 | 273 | 12 | 59 | 59.968 | P | 0.200 | 0.228  |

|      |     |   |    |        |         |           |         |     |        |
|------|-----|---|----|--------|---------|-----------|---------|-----|--------|
| 2007 | 184 | 8 | 26 | 1.7704 | 0.71500 | -30.27200 | 10.0000 | 333 | -0.001 |
|------|-----|---|----|--------|---------|-----------|---------|-----|--------|

|      |      |     |   |    |        |   |       |        |
|------|------|-----|---|----|--------|---|-------|--------|
| T11A | 2007 | 184 | 8 | 38 | 41.402 | P | 0.200 | 0.764  |
| V11A | 2007 | 184 | 8 | 38 | 41.452 | P | 0.200 | 0.328  |
| Q11A | 2007 | 184 | 8 | 38 | 42.380 | P | 0.200 | -0.123 |
| R11A | 2007 | 184 | 8 | 38 | 42.465 | P | 0.200 | 0.208  |
| TUQ  | 2007 | 184 | 8 | 38 | 43.263 | P | 0.200 | 0.181  |
| S11A | 2007 | 184 | 8 | 38 | 43.756 | P | 0.200 | 1.017  |
| SHO  | 2007 | 184 | 8 | 38 | 44.593 | P | 0.200 | 0.228  |
| HEC  | 2007 | 184 | 8 | 38 | 45.024 | P | 0.200 | 0.356  |
| TPNV | 2007 | 184 | 8 | 38 | 45.253 | P | 0.200 | 0.632  |
| R10A | 2007 | 184 | 8 | 38 | 45.473 | P | 0.200 | 0.523  |
| Q10A | 2007 | 184 | 8 | 38 | 45.534 | P | 0.200 | 0.001  |
| U10A | 2007 | 184 | 8 | 38 | 45.587 | P | 0.200 | 0.779  |
| S10A | 2007 | 184 | 8 | 38 | 46.394 | P | 0.200 | 0.295  |
| GSC  | 2007 | 184 | 8 | 38 | 46.673 | P | 0.200 | 0.087  |
| BBR  | 2007 | 184 | 8 | 38 | 47.413 | P | 0.200 | 0.353  |
| FUR  | 2007 | 184 | 8 | 38 | 47.542 | P | 0.200 | 0.783  |
| RRX  | 2007 | 184 | 8 | 38 | 47.686 | P | 0.200 | 0.425  |
| SVD  | 2007 | 184 | 8 | 38 | 47.811 | P | 0.200 | 0.315  |
| R09A | 2007 | 184 | 8 | 38 | 47.915 | P | 0.200 | -0.062 |
| Q09A | 2007 | 184 | 8 | 38 | 47.951 | P | 0.200 | -0.536 |
| P09A | 2007 | 184 | 8 | 38 | 47.979 | P | 0.200 | -0.437 |
| TPH  | 2007 | 184 | 8 | 38 | 48.520 | P | 0.200 | -0.046 |

|      |      |     |   |    |        |   |       |        |
|------|------|-----|---|----|--------|---|-------|--------|
| S09A | 2007 | 184 | 8 | 38 | 48.539 | P | 0.200 | 0.020  |
| VTV  | 2007 | 184 | 8 | 38 | 48.581 | P | 0.200 | -0.040 |
| SLA  | 2007 | 184 | 8 | 38 | 48.625 | P | 0.200 | 0.185  |
| O09A | 2007 | 184 | 8 | 38 | 48.792 | P | 0.200 | 0.192  |
| GRA  | 2007 | 184 | 8 | 38 | 49.207 | P | 0.200 | 0.336  |
| MPM  | 2007 | 184 | 8 | 38 | 49.594 | P | 0.200 | 0.087  |
| BFS  | 2007 | 184 | 8 | 38 | 49.612 | P | 0.200 | -0.376 |
| LRL  | 2007 | 184 | 8 | 38 | 50.149 | P | 0.200 | 0.034  |
| Q08A | 2007 | 184 | 8 | 38 | 50.356 | P | 0.200 | -0.798 |
| CHF  | 2007 | 184 | 8 | 38 | 51.067 | P | 0.200 | -0.362 |
| EDW2 | 2007 | 184 | 8 | 38 | 51.174 | P | 0.200 | -0.061 |
| MWC  | 2007 | 184 | 8 | 38 | 51.239 | P | 0.200 | -0.298 |
| VCS  | 2007 | 184 | 8 | 38 | 51.286 | P | 0.200 | -0.502 |
| PASC | 2007 | 184 | 8 | 38 | 51.434 | P | 0.200 | -0.430 |
| O08A | 2007 | 184 | 8 | 38 | 51.676 | P | 0.200 | -0.578 |
| R08A | 2007 | 184 | 8 | 38 | 51.719 | P | 0.200 | -0.171 |
| CWC  | 2007 | 184 | 8 | 38 | 51.800 | P | 0.200 | 0.143  |
| DEC  | 2007 | 184 | 8 | 38 | 51.921 | P | 0.200 | -0.571 |
| N08A | 2007 | 184 | 8 | 38 | 51.934 | P | 0.200 | -0.188 |
| TIN  | 2007 | 184 | 8 | 38 | 52.156 | P | 0.200 | -0.029 |
| FMP  | 2007 | 184 | 8 | 38 | 52.341 | P | 0.200 | 0.022  |
| S08C | 2007 | 184 | 8 | 38 | 52.608 | P | 0.200 | 0.251  |
| DJJ  | 2007 | 184 | 8 | 38 | 52.690 | P | 0.200 | -0.284 |
| RPV  | 2007 | 184 | 8 | 38 | 52.727 | P | 0.200 | 0.131  |
| CIA  | 2007 | 184 | 8 | 38 | 52.753 | P | 0.200 | 0.009  |
| ISA  | 2007 | 184 | 8 | 38 | 53.571 | P | 0.200 | 0.433  |
| OSI  | 2007 | 184 | 8 | 38 | 53.753 | P | 0.200 | -0.231 |
| O07A | 2007 | 184 | 8 | 38 | 54.277 | P | 0.200 | -0.358 |
| VES  | 2007 | 184 | 8 | 38 | 54.564 | P | 0.200 | -0.838 |
| N07B | 2007 | 184 | 8 | 38 | 54.730 | P | 0.200 | -0.336 |
| HELL | 2007 | 184 | 8 | 38 | 54.789 | P | 0.200 | -0.401 |
| ARV  | 2007 | 184 | 8 | 38 | 54.827 | P | 0.200 | 0.467  |
| LGU  | 2007 | 184 | 8 | 38 | 54.977 | P | 0.200 | -0.309 |
| MLAC | 2007 | 184 | 8 | 38 | 55.107 | P | 0.200 | 0.420  |
| BAK  | 2007 | 184 | 8 | 38 | 55.585 | P | 0.200 | 0.119  |
| R07C | 2007 | 184 | 8 | 38 | 55.850 | P | 0.200 | 0.453  |
| M07A | 2007 | 184 | 8 | 38 | 56.002 | P | 0.200 | 0.255  |
| T06C | 2007 | 184 | 8 | 38 | 56.618 | P | 0.200 | -0.965 |
| SN55 | 2007 | 184 | 8 | 38 | 56.858 | P | 0.200 | 0.254  |
| SN98 | 2007 | 184 | 8 | 38 | 57.217 | P | 0.200 | 0.450  |
| L07A | 2007 | 184 | 8 | 38 | 57.302 | P | 0.200 | 0.905  |
| SNB9 | 2007 | 184 | 8 | 38 | 57.551 | P | 0.200 | 0.102  |
| R06C | 2007 | 184 | 8 | 38 | 57.644 | P | 0.200 | 0.722  |
| V05C | 2007 | 184 | 8 | 38 | 57.877 | P | 0.200 | -0.643 |
| SN64 | 2007 | 184 | 8 | 38 | 57.973 | P | 0.200 | 0.223  |
| O06A | 2007 | 184 | 8 | 38 | 57.990 | P | 0.200 | -0.092 |
| N06A | 2007 | 184 | 8 | 38 | 58.003 | P | 0.200 | -0.087 |
| YO02 | 2007 | 184 | 8 | 38 | 58.336 | P | 0.200 | 0.161  |
| YO01 | 2007 | 184 | 8 | 38 | 58.380 | P | 0.200 | 0.176  |
| WCN  | 2007 | 184 | 8 | 38 | 58.400 | P | 0.200 | 0.378  |
| P06A | 2007 | 184 | 8 | 38 | 58.405 | P | 0.200 | -0.072 |
| SN63 | 2007 | 184 | 8 | 38 | 58.418 | P | 0.200 | 0.159  |
| S06C | 2007 | 184 | 8 | 38 | 58.520 | P | 0.200 | 0.234  |
| MPP  | 2007 | 184 | 8 | 38 | 58.764 | P | 0.200 | 0.373  |
| U05C | 2007 | 184 | 8 | 38 | 58.784 | P | 0.200 | -0.444 |
| SN97 | 2007 | 184 | 8 | 38 | 58.940 | P | 0.200 | 0.756  |
| SN86 | 2007 | 184 | 8 | 38 | 59.001 | P | 0.200 | 0.661  |
| SND9 | 2007 | 184 | 8 | 38 | 59.001 | P | 0.200 | 0.207  |
| SNE9 | 2007 | 184 | 8 | 38 | 59.483 | P | 0.200 | 0.031  |
| SN96 | 2007 | 184 | 8 | 38 | 59.614 | P | 0.200 | 0.547  |
| R05C | 2007 | 184 | 8 | 38 | 59.628 | P | 0.200 | 0.303  |
| SND8 | 2007 | 184 | 8 | 38 | 59.732 | P | 0.200 | 0.056  |
| S05C | 2007 | 184 | 8 | 38 | 59.972 | P | 0.200 | 0.090  |



|      |      |     |   |    |        |   |       |        |
|------|------|-----|---|----|--------|---|-------|--------|
| SNF9 | 2007 | 184 | 8 | 38 | 59.976 | P | 0.200 | -0.239 |
| SNB7 | 2007 | 184 | 8 | 39 | 0.004  | P | 0.200 | 0.553  |
| BEK  | 2007 | 184 | 8 | 39 | 0.053  | P | 0.200 | 0.002  |
| CMB  | 2007 | 184 | 8 | 39 | 0.147  | P | 0.200 | -0.089 |
| PKD  | 2007 | 184 | 8 | 39 | 0.293  | P | 0.200 | -0.710 |
| SNB6 | 2007 | 184 | 8 | 39 | 0.313  | P | 0.200 | 0.344  |
| SNA5 | 2007 | 184 | 8 | 39 | 0.444  | P | 0.200 | 0.385  |
| SNC7 | 2007 | 184 | 8 | 39 | 0.737  | P | 0.200 | 0.324  |
| M06C | 2007 | 184 | 8 | 39 | 0.805  | P | 0.200 | 0.447  |
| SNA4 | 2007 | 184 | 8 | 39 | 0.816  | P | 0.200 | 0.035  |
| SNC6 | 2007 | 184 | 8 | 39 | 0.880  | P | 0.200 | 0.294  |
| SND7 | 2007 | 184 | 8 | 39 | 0.897  | P | 0.200 | -0.058 |
| SNB5 | 2007 | 184 | 8 | 39 | 1.033  | P | 0.200 | 0.179  |
| SN93 | 2007 | 184 | 8 | 39 | 1.042  | P | 0.200 | 0.093  |
| PHL  | 2007 | 184 | 8 | 39 | 1.090  | P | 0.200 | 0.049  |
| P05C | 2007 | 184 | 8 | 39 | 1.231  | P | 0.200 | 0.149  |
| ELFS | 2007 | 184 | 8 | 39 | 1.325  | P | 0.200 | -0.068 |
| SNC5 | 2007 | 184 | 8 | 39 | 1.377  | P | 0.200 | -0.158 |
| SNE7 | 2007 | 184 | 8 | 39 | 1.380  | P | 0.200 | -0.054 |
| LAVA | 2007 | 184 | 8 | 39 | 1.545  | P | 0.200 | 0.038  |
| SNA3 | 2007 | 184 | 8 | 39 | 1.560  | P | 0.200 | 0.187  |
| SNE6 | 2007 | 184 | 8 | 39 | 1.628  | P | 0.200 | -0.171 |
| SND5 | 2007 | 184 | 8 | 39 | 1.858  | P | 0.200 | -0.258 |
| T05C | 2007 | 184 | 8 | 39 | 1.879  | P | 0.200 | 0.695  |
| O05C | 2007 | 184 | 8 | 39 | 1.898  | P | 0.200 | -0.053 |
| SNC4 | 2007 | 184 | 8 | 39 | 1.903  | P | 0.200 | -0.240 |
| L05A | 2007 | 184 | 8 | 39 | 2.044  | P | 0.200 | 0.475  |
| SNF6 | 2007 | 184 | 8 | 39 | 2.143  | P | 0.200 | -0.617 |
| O04C | 2007 | 184 | 8 | 39 | 2.218  | P | 0.200 | -0.456 |
| SNE5 | 2007 | 184 | 8 | 39 | 2.425  | P | 0.200 | -0.439 |
| R04C | 2007 | 184 | 8 | 39 | 2.450  | P | 0.200 | 0.347  |
| SNB3 | 2007 | 184 | 8 | 39 | 2.475  | P | 0.200 | 0.231  |
| SND4 | 2007 | 184 | 8 | 39 | 2.583  | P | 0.200 | -0.255 |
| M05C | 2007 | 184 | 8 | 39 | 2.586  | P | 0.200 | -0.065 |
| SNG7 | 2007 | 184 | 8 | 39 | 2.794  | P | 0.200 | -0.144 |
| SNE4 | 2007 | 184 | 8 | 39 | 3.203  | P | 0.200 | -0.334 |
| SNG5 | 2007 | 184 | 8 | 39 | 3.448  | P | 0.200 | -0.759 |
| ORV  | 2007 | 184 | 8 | 39 | 3.471  | P | 0.200 | -0.508 |
| SNC3 | 2007 | 184 | 8 | 39 | 3.509  | P | 0.200 | 0.459  |
| HATC | 2007 | 184 | 8 | 39 | 3.746  | P | 0.200 | -0.053 |
| S04C | 2007 | 184 | 8 | 39 | 3.855  | P | 0.200 | 0.261  |
| PACP | 2007 | 184 | 8 | 39 | 4.002  | P | 0.200 | 0.375  |
| Q04C | 2007 | 184 | 8 | 39 | 4.251  | P | 0.200 | 0.562  |
| L04A | 2007 | 184 | 8 | 39 | 4.630  | P | 0.200 | -0.574 |
| HAST | 2007 | 184 | 8 | 39 | 4.651  | P | 0.200 | -0.083 |
| SUTB | 2007 | 184 | 8 | 39 | 4.734  | P | 0.200 | -0.318 |
| O03C | 2007 | 184 | 8 | 39 | 4.813  | P | 0.200 | -1.080 |
| M03C | 2007 | 184 | 8 | 39 | 5.403  | P | 0.200 | -0.635 |
| J04A | 2007 | 184 | 8 | 39 | 5.427  | P | 0.200 | -0.403 |
| MHC  | 2007 | 184 | 8 | 39 | 5.434  | P | 0.200 | 0.494  |
| I04A | 2007 | 184 | 8 | 39 | 5.558  | P | 0.200 | -1.007 |
| WDC  | 2007 | 184 | 8 | 39 | 5.625  | P | 0.200 | -1.962 |
| WENL | 2007 | 184 | 8 | 39 | 5.772  | P | 0.200 | 0.575  |
| BDM  | 2007 | 184 | 8 | 39 | 6.080  | P | 0.200 | 0.448  |
| YBH  | 2007 | 184 | 8 | 39 | 6.321  | P | 0.200 | -1.747 |
| Q03C | 2007 | 184 | 8 | 39 | 6.884  | P | 0.200 | 0.817  |
| BRIB | 2007 | 184 | 8 | 39 | 6.931  | P | 0.200 | 0.318  |
| BNLO | 2007 | 184 | 8 | 39 | 6.968  | P | 0.200 | -0.017 |
| BRK  | 2007 | 184 | 8 | 39 | 7.137  | P | 0.200 | 0.147  |
| JRSC | 2007 | 184 | 8 | 39 | 7.222  | P | 0.200 | 0.212  |
| O02C | 2007 | 184 | 8 | 39 | 7.514  | P | 0.200 | -1.040 |
| M02C | 2007 | 184 | 8 | 39 | 7.577  | P | 0.200 | -1.065 |
| CVS  | 2007 | 184 | 8 | 39 | 7.585  | P | 0.200 | -0.035 |

|      |      |     |   |    |        |   |       |        |
|------|------|-----|---|----|--------|---|-------|--------|
| MNRC | 2007 | 184 | 8 | 39 | 8.046  | P | 0.200 | 0.479  |
| I03A | 2007 | 184 | 8 | 39 | 8.862  | P | 0.200 | -0.432 |
| DBO  | 2007 | 184 | 8 | 39 | 9.227  | P | 0.200 | -0.316 |
| MCCM | 2007 | 184 | 8 | 39 | 9.300  | P | 0.200 | 0.088  |
| N02C | 2007 | 184 | 8 | 39 | 9.909  | P | 0.200 | -0.431 |
| K02A | 2007 | 184 | 8 | 39 | 10.032 | P | 0.200 | -0.503 |
| J02A | 2007 | 184 | 8 | 39 | 10.235 | P | 0.200 | -0.238 |
| L02A | 2007 | 184 | 8 | 39 | 10.498 | P | 0.200 | -0.393 |
| P01C | 2007 | 184 | 8 | 39 | 11.295 | P | 0.200 | 0.594  |
| TAKO | 2007 | 184 | 8 | 39 | 11.940 | P | 0.200 | -0.080 |
| O01C | 2007 | 184 | 8 | 39 | 12.657 | P | 0.200 | 0.451  |
| JCC  | 2007 | 184 | 8 | 39 | 12.683 | P | 0.200 | 0.004  |
| M01C | 2007 | 184 | 8 | 39 | 12.801 | P | 0.200 | 0.024  |

|      |      |     |    |         |         |           |         |        |       |
|------|------|-----|----|---------|---------|-----------|---------|--------|-------|
| 2007 | 232  | 22  | 42 | 30.0310 | 8.03800 | -39.24800 | 10.0000 | 352    | 0.000 |
| T11A | 2007 | 232 | 22 | 54      | 6.899   | P         | 0.200   | 0.469  |       |
| U11A | 2007 | 232 | 22 | 54      | 7.208   | P         | 0.200   | 0.219  |       |
| V11A | 2007 | 232 | 22 | 54      | 7.285   | P         | 0.200   | 0.166  |       |
| Q11A | 2007 | 232 | 22 | 54      | 8.338   | P         | 0.200   | -0.287 |       |
| R11A | 2007 | 232 | 22 | 54      | 8.367   | P         | 0.200   | 0.031  |       |
| TUQ  | 2007 | 232 | 22 | 54      | 9.569   | P         | 0.200   | 0.118  |       |
| S11A | 2007 | 232 | 22 | 54      | 9.619   | P         | 0.200   | 0.703  |       |
| SHO  | 2007 | 232 | 22 | 54      | 11.126  | P         | 0.200   | 0.159  |       |
| HEC  | 2007 | 232 | 22 | 54      | 11.615  | P         | 0.200   | 0.280  |       |
| TPNV | 2007 | 232 | 22 | 54      | 11.628  | P         | 0.200   | 0.462  |       |
| R10A | 2007 | 232 | 22 | 54      | 11.970  | P         | 0.200   | 0.448  |       |
| U10A | 2007 | 232 | 22 | 54      | 12.035  | P         | 0.200   | 0.651  |       |
| Q10A | 2007 | 232 | 22 | 54      | 12.203  | P         | 0.200   | 0.031  |       |
| P10A | 2007 | 232 | 22 | 54      | 12.685  | P         | 0.200   | 0.236  |       |
| S10A | 2007 | 232 | 22 | 54      | 12.995  | P         | 0.200   | 0.123  |       |
| GSC  | 2007 | 232 | 22 | 54      | 13.719  | P         | 0.200   | 0.156  |       |
| FUR  | 2007 | 232 | 22 | 54      | 14.317  | P         | 0.200   | 0.567  |       |
| BBR  | 2007 | 232 | 22 | 54      | 14.675  | P         | 0.200   | 0.438  |       |
| RRX  | 2007 | 232 | 22 | 54      | 14.751  | P         | 0.200   | 0.331  |       |
| R09A | 2007 | 232 | 22 | 54      | 14.895  | P         | 0.200   | -0.188 |       |
| SVD  | 2007 | 232 | 22 | 54      | 15.266  | P         | 0.200   | 0.446  |       |
| Q09A | 2007 | 232 | 22 | 54      | 15.309  | P         | 0.200   | -0.352 |       |
| P09A | 2007 | 232 | 22 | 54      | 15.318  | P         | 0.200   | -0.229 |       |
| TPH  | 2007 | 232 | 22 | 54      | 15.557  | P         | 0.200   | -0.220 |       |
| S09A | 2007 | 232 | 22 | 54      | 15.683  | P         | 0.200   | -0.055 |       |
| O09A | 2007 | 232 | 22 | 54      | 15.934  | P         | 0.200   | 0.118  |       |
| SLA  | 2007 | 232 | 22 | 54      | 16.029  | P         | 0.200   | 0.260  |       |
| VTV  | 2007 | 232 | 22 | 54      | 16.115  | P         | 0.200   | 0.061  |       |
| GRA  | 2007 | 232 | 22 | 54      | 16.520  | P         | 0.200   | 0.316  |       |
| ADO  | 2007 | 232 | 22 | 54      | 16.707  | P         | 0.200   | 0.264  |       |
| MPM  | 2007 | 232 | 22 | 54      | 17.139  | P         | 0.200   | 0.189  |       |
| BFS  | 2007 | 232 | 22 | 54      | 17.420  | P         | 0.200   | -0.271 |       |
| LRL  | 2007 | 232 | 22 | 54      | 17.722  | P         | 0.200   | -0.027 |       |
| Q08A | 2007 | 232 | 22 | 54      | 18.248  | P         | 0.200   | -0.621 |       |
| P08A | 2007 | 232 | 22 | 54      | 19.020  | P         | 0.200   | -0.514 |       |
| EDW2 | 2007 | 232 | 22 | 54      | 19.079  | P         | 0.200   | -0.061 |       |
| CHF  | 2007 | 232 | 22 | 54      | 19.146  | P         | 0.200   | -0.270 |       |
| MWC  | 2007 | 232 | 22 | 54      | 19.303  | P         | 0.200   | -0.257 |       |
| R08A | 2007 | 232 | 22 | 54      | 19.442  | P         | 0.200   | -0.256 |       |
| VCS  | 2007 | 232 | 22 | 54      | 19.471  | P         | 0.200   | -0.328 |       |
| O08A | 2007 | 232 | 22 | 54      | 19.651  | P         | 0.200   | -0.491 |       |
| PASC | 2007 | 232 | 22 | 54      | 19.752  | P         | 0.200   | -0.234 |       |
| N08A | 2007 | 232 | 22 | 54      | 19.759  | P         | 0.200   | -0.238 |       |
| CWC  | 2007 | 232 | 22 | 54      | 19.865  | P         | 0.200   | 0.330  |       |
| DEC  | 2007 | 232 | 22 | 54      | 20.345  | P         | 0.200   | -0.382 |       |
| TIN  | 2007 | 232 | 22 | 54      | 20.354  | P         | 0.200   | 0.201  |       |
| FMP  | 2007 | 232 | 22 | 54      | 20.641  | P         | 0.200   | 0.098  |       |
| S08C | 2007 | 232 | 22 | 54      | 20.647  | P         | 0.200   | 0.395  |       |

|      |      |     |    |    |        |   |       |        |
|------|------|-----|----|----|--------|---|-------|--------|
| USC  | 2007 | 232 | 22 | 54 | 20.886 | P | 0.200 | 0.404  |
| RPV  | 2007 | 232 | 22 | 54 | 21.109 | P | 0.200 | 0.177  |
| DJJ  | 2007 | 232 | 22 | 54 | 21.122 | P | 0.200 | -0.175 |
| CIA  | 2007 | 232 | 22 | 54 | 21.381 | P | 0.200 | 0.259  |
| ISA  | 2007 | 232 | 22 | 54 | 21.831 | P | 0.200 | 0.479  |
| O07A | 2007 | 232 | 22 | 54 | 22.510 | P | 0.200 | -0.547 |
| Q07A | 2007 | 232 | 22 | 54 | 22.665 | P | 0.200 | -0.150 |
| N07B | 2007 | 232 | 22 | 54 | 23.044 | P | 0.200 | -0.513 |
| P07A | 2007 | 232 | 22 | 54 | 23.238 | P | 0.200 | 0.143  |
| MLAC | 2007 | 232 | 22 | 54 | 23.431 | P | 0.200 | 0.343  |
| HELL | 2007 | 232 | 22 | 54 | 23.443 | P | 0.200 | -0.330 |
| ARV  | 2007 | 232 | 22 | 54 | 23.447 | P | 0.200 | 0.541  |
| VES  | 2007 | 232 | 22 | 54 | 23.468 | P | 0.200 | -0.577 |
| LGU  | 2007 | 232 | 22 | 54 | 23.774 | P | 0.200 | -0.328 |
| M07A | 2007 | 232 | 22 | 54 | 24.225 | P | 0.200 | -0.184 |
| R07C | 2007 | 232 | 22 | 54 | 24.314 | P | 0.200 | 0.372  |
| BAK  | 2007 | 232 | 22 | 54 | 24.543 | P | 0.200 | 0.366  |
| SN55 | 2007 | 232 | 22 | 54 | 25.583 | P | 0.200 | 0.231  |
| L07A | 2007 | 232 | 22 | 54 | 25.618 | P | 0.200 | 0.419  |
| T06C | 2007 | 232 | 22 | 54 | 25.652 | P | 0.200 | -0.991 |
| SN98 | 2007 | 232 | 22 | 54 | 25.729 | P | 0.200 | 0.199  |
| YO11 | 2007 | 232 | 22 | 54 | 25.947 | P | 0.200 | 0.262  |
| YO10 | 2007 | 232 | 22 | 54 | 26.060 | P | 0.200 | 0.190  |
| SNB9 | 2007 | 232 | 22 | 54 | 26.131 | P | 0.200 | -0.206 |
| R06C | 2007 | 232 | 22 | 54 | 26.286 | P | 0.200 | 0.552  |
| YO09 | 2007 | 232 | 22 | 54 | 26.330 | P | 0.200 | 0.252  |
| SCZ2 | 2007 | 232 | 22 | 54 | 26.380 | P | 0.200 | -0.430 |
| YO08 | 2007 | 232 | 22 | 54 | 26.527 | P | 0.200 | 0.304  |
| YO07 | 2007 | 232 | 22 | 54 | 26.681 | P | 0.200 | 0.225  |
| YO06 | 2007 | 232 | 22 | 54 | 26.832 | P | 0.200 | 0.207  |
| O06A | 2007 | 232 | 22 | 54 | 26.833 | P | 0.200 | -0.325 |
| N06A | 2007 | 232 | 22 | 54 | 26.859 | P | 0.200 | -0.320 |
| SN64 | 2007 | 232 | 22 | 54 | 26.974 | P | 0.200 | 0.251  |
| V05C | 2007 | 232 | 22 | 54 | 26.977 | P | 0.200 | -0.780 |
| WCN  | 2007 | 232 | 22 | 54 | 26.995 | P | 0.200 | -0.031 |
| SBC  | 2007 | 232 | 22 | 54 | 27.040 | P | 0.200 | 0.030  |
| YO05 | 2007 | 232 | 22 | 54 | 27.113 | P | 0.200 | 0.254  |
| YO04 | 2007 | 232 | 22 | 54 | 27.206 | P | 0.200 | 0.305  |
| YO03 | 2007 | 232 | 22 | 54 | 27.255 | P | 0.200 | 0.196  |
| P06A | 2007 | 232 | 22 | 54 | 27.296 | P | 0.200 | -0.262 |
| YO02 | 2007 | 232 | 22 | 54 | 27.369 | P | 0.200 | 0.161  |
| YO01 | 2007 | 232 | 22 | 54 | 27.432 | P | 0.200 | 0.163  |
| SN63 | 2007 | 232 | 22 | 54 | 27.437 | P | 0.200 | 0.087  |
| S06C | 2007 | 232 | 22 | 54 | 27.663 | P | 0.200 | 0.260  |
| SN97 | 2007 | 232 | 22 | 54 | 27.726 | P | 0.200 | 0.483  |
| SND9 | 2007 | 232 | 22 | 54 | 27.918 | P | 0.200 | -0.072 |
| U05C | 2007 | 232 | 22 | 54 | 27.954 | P | 0.200 | -0.667 |
| MPP  | 2007 | 232 | 22 | 54 | 28.036 | P | 0.200 | 0.354  |
| SNA7 | 2007 | 232 | 22 | 54 | 28.055 | P | 0.200 | 0.322  |
| SN86 | 2007 | 232 | 22 | 54 | 28.095 | P | 0.200 | 0.690  |
| SMM  | 2007 | 232 | 22 | 54 | 28.513 | P | 0.200 | 0.272  |
| SNE9 | 2007 | 232 | 22 | 54 | 28.621 | P | 0.200 | -0.147 |
| SND8 | 2007 | 232 | 22 | 54 | 28.845 | P | 0.200 | -0.143 |
| R05C | 2007 | 232 | 22 | 54 | 28.954 | P | 0.200 | 0.403  |
| SN96 | 2007 | 232 | 22 | 54 | 29.023 | P | 0.200 | 0.721  |
| SNB7 | 2007 | 232 | 22 | 54 | 29.077 | P | 0.200 | 0.327  |
| SNF9 | 2007 | 232 | 22 | 54 | 29.155 | P | 0.200 | -0.498 |
| S05C | 2007 | 232 | 22 | 54 | 29.326 | P | 0.200 | -0.040 |
| CMB  | 2007 | 232 | 22 | 54 | 29.559 | P | 0.200 | -0.140 |
| SNB6 | 2007 | 232 | 22 | 54 | 29.615 | P | 0.200 | 0.280  |
| PKD  | 2007 | 232 | 22 | 54 | 29.840 | P | 0.200 | -0.857 |
| SNC7 | 2007 | 232 | 22 | 54 | 29.865 | P | 0.200 | 0.028  |
| SNA5 | 2007 | 232 | 22 | 54 | 29.993 | P | 0.200 | 0.507  |

|      |      |     |    |    |        |   |       |        |
|------|------|-----|----|----|--------|---|-------|--------|
| M06C | 2007 | 232 | 22 | 54 | 30.000 | P | 0.200 | 0.110  |
| SNC6 | 2007 | 232 | 22 | 54 | 30.265 | P | 0.200 | 0.168  |
| SND7 | 2007 | 232 | 22 | 54 | 30.398 | P | 0.200 | -0.126 |
| SNB5 | 2007 | 232 | 22 | 54 | 30.577 | P | 0.200 | 0.178  |
| SNF8 | 2007 | 232 | 22 | 54 | 30.599 | P | 0.200 | -0.191 |
| SNA4 | 2007 | 232 | 22 | 54 | 30.612 | P | 0.200 | 0.281  |
| SN93 | 2007 | 232 | 22 | 54 | 30.698 | P | 0.200 | 0.114  |
| PHL  | 2007 | 232 | 22 | 54 | 30.737 | P | 0.200 | -0.039 |
| P05C | 2007 | 232 | 22 | 54 | 30.908 | P | 0.200 | 0.223  |
| ELFS | 2007 | 232 | 22 | 54 | 30.926 | P | 0.200 | -0.134 |
| SNE7 | 2007 | 232 | 22 | 54 | 31.071 | P | 0.200 | -0.008 |
| SNA3 | 2007 | 232 | 22 | 54 | 31.228 | P | 0.200 | 0.181  |
| LAVA | 2007 | 232 | 22 | 54 | 31.272 | P | 0.200 | 0.068  |
| SNC5 | 2007 | 232 | 22 | 54 | 31.306 | P | 0.200 | 0.067  |
| T05C | 2007 | 232 | 22 | 54 | 31.498 | P | 0.200 | 0.563  |
| SNE6 | 2007 | 232 | 22 | 54 | 31.610 | P | 0.200 | 0.043  |
| U04C | 2007 | 232 | 22 | 54 | 31.655 | P | 0.200 | -0.038 |
| SND5 | 2007 | 232 | 22 | 54 | 31.752 | P | 0.200 | -0.185 |
| SNC4 | 2007 | 232 | 22 | 54 | 31.819 | P | 0.200 | -0.173 |
| O05C | 2007 | 232 | 22 | 54 | 31.873 | P | 0.200 | 0.109  |
| K05A | 2007 | 232 | 22 | 54 | 31.965 | P | 0.200 | 0.307  |
| V04C | 2007 | 232 | 22 | 54 | 32.208 | P | 0.200 | 0.001  |
| O04C | 2007 | 232 | 22 | 54 | 32.251 | P | 0.200 | -0.332 |
| R04C | 2007 | 232 | 22 | 54 | 32.326 | P | 0.200 | 0.364  |
| SNF6 | 2007 | 232 | 22 | 54 | 32.334 | P | 0.200 | -0.343 |
| SNB3 | 2007 | 232 | 22 | 54 | 32.377 | P | 0.200 | 0.248  |
| SND4 | 2007 | 232 | 22 | 54 | 32.589 | P | 0.200 | -0.241 |
| SNE5 | 2007 | 232 | 22 | 54 | 32.668 | P | 0.200 | -0.177 |
| M05C | 2007 | 232 | 22 | 54 | 32.767 | P | 0.200 | 0.156  |
| J05A | 2007 | 232 | 22 | 54 | 33.226 | P | 0.200 | 0.280  |
| SNC3 | 2007 | 232 | 22 | 54 | 33.392 | P | 0.200 | 0.351  |
| SNE4 | 2007 | 232 | 22 | 54 | 33.419 | P | 0.200 | -0.185 |
| SNG5 | 2007 | 232 | 22 | 54 | 33.771 | P | 0.200 | -0.624 |
| ORV  | 2007 | 232 | 22 | 54 | 33.780 | P | 0.200 | -0.396 |
| V03C | 2007 | 232 | 22 | 54 | 33.872 | P | 0.200 | 0.135  |
| S04C | 2007 | 232 | 22 | 54 | 34.079 | P | 0.200 | 0.327  |
| PACP | 2007 | 232 | 22 | 54 | 34.130 | P | 0.200 | 0.339  |
| K04A | 2007 | 232 | 22 | 54 | 34.657 | P | 0.200 | -0.291 |
| SAO  | 2007 | 232 | 22 | 54 | 34.674 | P | 0.200 | 0.212  |
| HAST | 2007 | 232 | 22 | 54 | 35.101 | P | 0.200 | -0.012 |
| SUTB | 2007 | 232 | 22 | 54 | 35.133 | P | 0.200 | -0.305 |
| O03C | 2007 | 232 | 22 | 54 | 35.251 | P | 0.200 | -1.153 |
| M04C | 2007 | 232 | 22 | 54 | 35.276 | P | 0.200 | -0.228 |
| L04A | 2007 | 232 | 22 | 54 | 35.395 | P | 0.200 | -0.257 |
| MHC  | 2007 | 232 | 22 | 54 | 35.826 | P | 0.200 | 0.513  |
| M03C | 2007 | 232 | 22 | 54 | 36.042 | P | 0.200 | -0.570 |
| J04A | 2007 | 232 | 22 | 54 | 36.114 | P | 0.200 | -0.338 |
| WENL | 2007 | 232 | 22 | 54 | 36.172 | P | 0.200 | 0.535  |
| WDC  | 2007 | 232 | 22 | 54 | 36.369 | P | 0.200 | -2.042 |
| I04A | 2007 | 232 | 22 | 54 | 36.450 | P | 0.200 | -0.945 |
| BDM  | 2007 | 232 | 22 | 54 | 36.581 | P | 0.200 | 0.479  |
| YBH  | 2007 | 232 | 22 | 54 | 37.469 | P | 0.200 | -1.533 |
| Q03C | 2007 | 232 | 22 | 54 | 37.549 | P | 0.200 | 0.953  |
| BRIB | 2007 | 232 | 22 | 54 | 37.567 | P | 0.200 | 0.306  |
| BNLO | 2007 | 232 | 22 | 54 | 37.668 | P | 0.200 | -0.022 |
| JRSC | 2007 | 232 | 22 | 54 | 37.845 | P | 0.200 | 0.071  |
| BRK  | 2007 | 232 | 22 | 54 | 37.895 | P | 0.200 | 0.153  |
| BKS  | 2007 | 232 | 22 | 54 | 37.986 | P | 0.200 | 0.323  |
| O02C | 2007 | 232 | 22 | 54 | 38.412 | P | 0.200 | -1.129 |
| CVS  | 2007 | 232 | 22 | 54 | 38.492 | P | 0.200 | 0.031  |
| M02C | 2007 | 232 | 22 | 54 | 38.507 | P | 0.200 | -1.143 |
| HUMO | 2007 | 232 | 22 | 54 | 38.665 | P | 0.200 | -1.009 |
| J03A | 2007 | 232 | 22 | 54 | 38.677 | P | 0.200 | -0.937 |

|      |      |     |    |    |        |   |       |        |
|------|------|-----|----|----|--------|---|-------|--------|
| MNRC | 2007 | 232 | 22 | 54 | 38.970 | P | 0.200 | 0.587  |
| GASB | 2007 | 232 | 22 | 54 | 39.864 | P | 0.200 | 0.356  |
| I03A | 2007 | 232 | 22 | 54 | 40.107 | P | 0.200 | -0.513 |
| DBO  | 2007 | 232 | 22 | 54 | 40.366 | P | 0.200 | -0.446 |
| MCCM | 2007 | 232 | 22 | 54 | 40.427 | P | 0.200 | 0.105  |
| FARB | 2007 | 232 | 22 | 54 | 40.897 | P | 0.200 | -0.099 |
| N02C | 2007 | 232 | 22 | 54 | 41.053 | P | 0.200 | -0.533 |
| K02A | 2007 | 232 | 22 | 54 | 41.348 | P | 0.200 | -0.564 |
| J02A | 2007 | 232 | 22 | 54 | 41.668 | P | 0.200 | -0.262 |
| L02A | 2007 | 232 | 22 | 54 | 41.864 | P | 0.200 | -0.466 |
| P01C | 2007 | 232 | 22 | 54 | 42.636 | P | 0.200 | 0.635  |
| TAKO | 2007 | 232 | 22 | 54 | 44.013 | P | 0.200 | 0.238  |
| O01C | 2007 | 232 | 22 | 54 | 44.456 | P | 0.200 | 0.685  |
| JCC  | 2007 | 232 | 22 | 54 | 44.787 | P | 0.200 | 0.421  |
| M01C | 2007 | 232 | 22 | 54 | 44.802 | P | 0.200 | 0.314  |
| K01A | 2007 | 232 | 22 | 54 | 45.830 | P | 0.200 | 0.171  |

|      |      |     |    |         |          |           |         |        |        |
|------|------|-----|----|---------|----------|-----------|---------|--------|--------|
| 1988 | 176  | 8   | 57 | 57.2985 | 10.22900 | -60.60400 | 53.0000 | 403    | -0.002 |
| bar  | 1988 | 176 | 9  | 7       | 47.100   | P         | 0.200   | 0.032  |        |
| cha  | 1988 | 176 | 9  | 7       | 46.200   | P         | 0.200   | -0.004 |        |
| jun  | 1988 | 176 | 9  | 7       | 46.400   | P         | 0.200   | -0.049 |        |
| twr  | 1988 | 176 | 9  | 7       | 46.220   | P         | 0.200   | 0.145  |        |
| wil  | 1988 | 176 | 9  | 7       | 46.150   | P         | 0.200   | 0.214  |        |
| BMT  | 1988 | 176 | 9  | 7       | 45.320   | P         | 0.200   | -0.048 |        |
| BNP  | 1988 | 176 | 9  | 7       | 48.060   | P         | 0.200   | 0.233  |        |
| GSC  | 1988 | 176 | 9  | 7       | 35.530   | P         | 0.200   | 0.051  |        |
| LRM  | 1988 | 176 | 9  | 7       | 40.500   | P         | 0.200   | -0.246 |        |
| WCX  | 1988 | 176 | 9  | 7       | 39.800   | P         | 0.200   | -0.594 |        |
| WHV  | 1988 | 176 | 9  | 7       | 45.650   | P         | 0.200   | 0.271  |        |
| WJP  | 1988 | 176 | 9  | 7       | 45.270   | P         | 0.200   | 0.082  |        |
| WSH  | 1988 | 176 | 9  | 7       | 39.270   | P         | 0.200   | -0.576 |        |
| XMS  | 1988 | 176 | 9  | 7       | 38.900   | P         | 0.200   | -0.011 |        |
| BLK  | 1988 | 176 | 9  | 7       | 37.720   | P         | 0.200   | 0.238  |        |
| CAL  | 1988 | 176 | 9  | 7       | 41.620   | P         | 0.200   | -0.004 |        |
| HOD  | 1988 | 176 | 9  | 7       | 37.420   | P         | 0.200   | 0.094  |        |
| SBK  | 1988 | 176 | 9  | 7       | 39.720   | P         | 0.200   | 0.169  |        |

|      |      |     |    |         |          |           |         |        |       |
|------|------|-----|----|---------|----------|-----------|---------|--------|-------|
| 2005 | 301  | 22  | 30 | 59.0922 | 11.07000 | -62.04000 | 64.2000 | 31     | 0.007 |
| TUQ  | 2005 | 301 | 22 | 40      | 19.755   | P         | 0.200   | 0.227  |       |
| HEC  | 2005 | 301 | 22 | 40      | 21.446   | P         | 0.200   | 0.589  |       |
| SHO  | 2005 | 301 | 22 | 40      | 22.416   | P         | 0.200   | 0.316  |       |
| TPNV | 2005 | 301 | 22 | 40      | 24.697   | P         | 0.200   | 0.872  |       |
| GSC  | 2005 | 301 | 22 | 40      | 24.783   | P         | 0.200   | 0.407  |       |
| FUR  | 2005 | 301 | 22 | 40      | 26.961   | P         | 0.200   | 0.649  |       |
| BFS  | 2005 | 301 | 22 | 40      | 27.921   | P         | 0.200   | 0.041  |       |
| MPM  | 2005 | 301 | 22 | 40      | 29.519   | P         | 0.200   | 0.042  |       |
| LRL  | 2005 | 301 | 22 | 40      | 29.822   | P         | 0.200   | 0.133  |       |
| GRA  | 2005 | 301 | 22 | 40      | 30.521   | P         | 0.200   | 0.418  |       |
| EDW2 | 2005 | 301 | 22 | 40      | 30.728   | P         | 0.200   | 0.110  |       |
| TPH  | 2005 | 301 | 22 | 40      | 31.084   | P         | 0.200   | -0.044 |       |
| CIA  | 2005 | 301 | 22 | 40      | 31.586   | P         | 0.200   | 0.451  |       |
| DEC  | 2005 | 301 | 22 | 40      | 31.621   | P         | 0.200   | -0.073 |       |
| CWC  | 2005 | 301 | 22 | 40      | 33.767   | P         | 0.200   | 0.417  |       |
| OSI  | 2005 | 301 | 22 | 40      | 34.033   | P         | 0.200   | -0.438 |       |
| TIN  | 2005 | 301 | 22 | 40      | 35.414   | P         | 0.200   | 0.439  |       |
| LGU  | 2005 | 301 | 22 | 40      | 35.789   | P         | 0.200   | 0.041  |       |
| S08C | 2005 | 301 | 22 | 40      | 36.264   | P         | 0.200   | 0.608  |       |
| SN28 | 2005 | 301 | 22 | 40      | 36.505   | P         | 0.200   | 0.473  |       |
| SN38 | 2005 | 301 | 22 | 40      | 37.363   | P         | 0.200   | 0.031  |       |
| SN15 | 2005 | 301 | 22 | 40      | 37.689   | P         | 0.200   | 0.129  |       |
| SN25 | 2005 | 301 | 22 | 40      | 38.238   | P         | 0.200   | -0.045 |       |
| VES  | 2005 | 301 | 22 | 40      | 38.380   | P         | 0.200   | 0.435  |       |
| SN37 | 2005 | 301 | 22 | 40      | 38.453   | P         | 0.200   | 0.462  |       |

|      |      |     |    |    |        |   |       |        |
|------|------|-----|----|----|--------|---|-------|--------|
| SN48 | 2005 | 301 | 22 | 40 | 38.514 | P | 0.200 | -0.042 |
| SN36 | 2005 | 301 | 22 | 40 | 38.754 | P | 0.200 | 0.255  |
| SCZ2 | 2005 | 301 | 22 | 40 | 38.803 | P | 0.200 | -0.163 |
| HELL | 2005 | 301 | 22 | 40 | 39.074 | P | 0.200 | 0.179  |
| RCT  | 2005 | 301 | 22 | 40 | 39.143 | P | 0.200 | -0.373 |
| SN47 | 2005 | 301 | 22 | 40 | 39.452 | P | 0.200 | 0.245  |
| SN11 | 2005 | 301 | 22 | 40 | 39.607 | P | 0.200 | -0.786 |
| SN34 | 2005 | 301 | 22 | 40 | 40.352 | P | 0.200 | 0.106  |
| SN23 | 2005 | 301 | 22 | 40 | 40.404 | P | 0.200 | -0.298 |
| SN46 | 2005 | 301 | 22 | 40 | 40.447 | P | 0.200 | 0.399  |
| SN45 | 2005 | 301 | 22 | 40 | 41.035 | P | 0.200 | 0.176  |
| SN57 | 2005 | 301 | 22 | 40 | 41.038 | P | 0.200 | 0.182  |
| R07C | 2005 | 301 | 22 | 40 | 41.341 | P | 0.200 | 0.247  |
| SN44 | 2005 | 301 | 22 | 40 | 41.445 | P | 0.200 | -0.157 |
| MPP  | 2005 | 301 | 22 | 40 | 41.465 | P | 0.200 | 0.268  |
| T06C | 2005 | 301 | 22 | 40 | 41.568 | P | 0.200 | -1.418 |
| SN56 | 2005 | 301 | 22 | 40 | 41.884 | P | 0.200 | 0.115  |
| SN43 | 2005 | 301 | 22 | 40 | 42.095 | P | 0.200 | -0.512 |
| SN67 | 2005 | 301 | 22 | 40 | 42.227 | P | 0.200 | 0.195  |
| SN55 | 2005 | 301 | 22 | 40 | 42.532 | P | 0.200 | -0.034 |
| SN52 | 2005 | 301 | 22 | 40 | 43.005 | P | 0.200 | -1.087 |
| SN54 | 2005 | 301 | 22 | 40 | 43.154 | P | 0.200 | 0.017  |
| SN66 | 2005 | 301 | 22 | 40 | 43.318 | P | 0.200 | 0.384  |
| SN53 | 2005 | 301 | 22 | 40 | 43.427 | P | 0.200 | -0.228 |
| SN64 | 2005 | 301 | 22 | 40 | 44.219 | P | 0.200 | 0.074  |
| SN76 | 2005 | 301 | 22 | 40 | 44.365 | P | 0.200 | 0.249  |
| SN51 | 2005 | 301 | 22 | 40 | 44.415 | P | 0.200 | -0.844 |
| R06C | 2005 | 301 | 22 | 40 | 44.415 | P | 0.200 | 0.479  |
| SN62 | 2005 | 301 | 22 | 40 | 44.826 | P | 0.200 | -0.637 |
| S06C | 2005 | 301 | 22 | 40 | 45.186 | P | 0.200 | 0.015  |
| PKD  | 2005 | 301 | 22 | 40 | 45.330 | P | 0.200 | -1.009 |
| SN74 | 2005 | 301 | 22 | 40 | 45.631 | P | 0.200 | -0.119 |
| SN73 | 2005 | 301 | 22 | 40 | 46.129 | P | 0.200 | -0.317 |
| SN86 | 2005 | 301 | 22 | 40 | 46.281 | P | 0.200 | 0.309  |
| SN85 | 2005 | 301 | 22 | 40 | 46.621 | P | 0.200 | 0.253  |
| S05C | 2005 | 301 | 22 | 40 | 46.622 | P | 0.200 | -0.221 |
| SN71 | 2005 | 301 | 22 | 40 | 47.117 | P | 0.200 | -0.507 |
| SN84 | 2005 | 301 | 22 | 40 | 47.127 | P | 0.200 | -0.036 |
| U04C | 2005 | 301 | 22 | 40 | 47.571 | P | 0.200 | -0.663 |
| CMB  | 2005 | 301 | 22 | 40 | 47.802 | P | 0.200 | -0.357 |
| RAMR | 2005 | 301 | 22 | 40 | 47.850 | P | 0.200 | -0.027 |
| V04C | 2005 | 301 | 22 | 40 | 47.851 | P | 0.200 | -0.029 |
| SN95 | 2005 | 301 | 22 | 40 | 47.993 | P | 0.200 | -0.073 |
| R05C | 2005 | 301 | 22 | 40 | 48.019 | P | 0.200 | 0.332  |
| LAVA | 2005 | 301 | 22 | 40 | 50.775 | P | 0.200 | -0.252 |
| P05C | 2005 | 301 | 22 | 40 | 51.295 | P | 0.200 | 0.073  |
| R04C | 2005 | 301 | 22 | 40 | 51.652 | P | 0.200 | 0.317  |
| PACP | 2005 | 301 | 22 | 40 | 51.968 | P | 0.200 | 0.176  |
| HAST | 2005 | 301 | 22 | 40 | 52.191 | P | 0.200 | -0.297 |
| SAO  | 2005 | 301 | 22 | 40 | 52.242 | P | 0.200 | -0.092 |
| S04C | 2005 | 301 | 22 | 40 | 52.396 | P | 0.200 | -0.038 |
| M06C | 2005 | 301 | 22 | 40 | 52.414 | P | 0.200 | -0.858 |
| O05C | 2005 | 301 | 22 | 40 | 53.357 | P | 0.200 | -0.276 |
| MHC  | 2005 | 301 | 22 | 40 | 54.400 | P | 0.200 | 0.232  |
| WENL | 2005 | 301 | 22 | 40 | 55.604 | P | 0.200 | 0.668  |
| ORV  | 2005 | 301 | 22 | 40 | 55.717 | P | 0.200 | -0.239 |
| SUTB | 2005 | 301 | 22 | 40 | 56.875 | P | 0.200 | -0.258 |
| M04C | 2005 | 301 | 22 | 41 | 0.585  | P | 0.200 | -0.392 |

|      |      |     |    |         |          |           |         |        |
|------|------|-----|----|---------|----------|-----------|---------|--------|
| 2005 | 266  | 13  | 48 | 31.8472 | 16.13100 | -87.48800 | 29.8000 |        |
| HEC  | 2005 | 266 | 13 | 54      | 54.029   | P         | 0.200   | -0.037 |
| BBR  | 2005 | 266 | 13 | 54      | 55.799   | P         | 0.200   | 0.105  |
| SHO  | 2005 | 266 | 13 | 54      | 58.154   | P         | 0.200   | -0.050 |

|      |      |     |    |    |        |   |       |        |
|------|------|-----|----|----|--------|---|-------|--------|
| RRX  | 2005 | 266 | 13 | 54 | 58.611 | P | 0.200 | 0.139  |
| GSC  | 2005 | 266 | 13 | 54 | 59.123 | P | 0.200 | 0.031  |
| BFS  | 2005 | 266 | 13 | 55 | 0.076  | P | 0.200 | -0.263 |
| CIA  | 2005 | 266 | 13 | 55 | 1.773  | P | 0.200 | -0.345 |
| FMP  | 2005 | 266 | 13 | 55 | 2.153  | P | 0.200 | -0.225 |
| DEC  | 2005 | 266 | 13 | 55 | 4.366  | P | 0.200 | -0.302 |
| FUR  | 2005 | 266 | 13 | 55 | 4.476  | P | 0.200 | 0.192  |
| EDW2 | 2005 | 266 | 13 | 55 | 4.480  | P | 0.200 | -0.465 |
| LRL  | 2005 | 266 | 13 | 55 | 5.248  | P | 0.200 | -0.129 |
| MPM  | 2005 | 266 | 13 | 55 | 6.293  | P | 0.200 | -0.303 |
| OSI  | 2005 | 266 | 13 | 55 | 7.742  | P | 0.200 | -0.857 |
| LGU  | 2005 | 266 | 13 | 55 | 8.758  | P | 0.200 | -0.158 |
| GRA  | 2005 | 266 | 13 | 55 | 10.172 | P | 0.200 | 0.428  |
| ARV  | 2005 | 266 | 13 | 55 | 10.862 | P | 0.200 | -0.258 |
| ISA  | 2005 | 266 | 13 | 55 | 11.098 | P | 0.200 | 0.031  |
| SCZ2 | 2005 | 266 | 13 | 55 | 11.694 | P | 0.200 | -0.607 |
| CWC  | 2005 | 266 | 13 | 55 | 12.019 | P | 0.200 | 0.217  |
| SBC  | 2005 | 266 | 13 | 55 | 13.983 | P | 0.200 | -0.312 |
| VES  | 2005 | 266 | 13 | 55 | 15.522 | P | 0.200 | 0.143  |
| TIN  | 2005 | 266 | 13 | 55 | 15.558 | P | 0.200 | 0.390  |
| SN16 | 2005 | 266 | 13 | 55 | 17.119 | P | 0.200 | 0.406  |
| S08C | 2005 | 266 | 13 | 55 | 17.408 | P | 0.200 | 0.375  |
| RCT  | 2005 | 266 | 13 | 55 | 18.031 | P | 0.200 | -0.193 |
| HELL | 2005 | 266 | 13 | 55 | 18.819 | P | 0.200 | 0.333  |
| SN15 | 2005 | 266 | 13 | 55 | 18.871 | P | 0.200 | 0.338  |
| SN28 | 2005 | 266 | 13 | 55 | 19.151 | P | 0.200 | 0.655  |
| SMM  | 2005 | 266 | 13 | 55 | 19.289 | P | 0.200 | -0.041 |
| SN26 | 2005 | 266 | 13 | 55 | 19.498 | P | 0.200 | 0.435  |
| SN11 | 2005 | 266 | 13 | 55 | 19.764 | P | 0.200 | -0.455 |
| SN25 | 2005 | 266 | 13 | 55 | 19.892 | P | 0.200 | 0.391  |
| V05C | 2005 | 266 | 13 | 55 | 20.949 | P | 0.200 | 0.219  |
| SN38 | 2005 | 266 | 13 | 55 | 20.974 | P | 0.200 | 0.673  |
| SN24 | 2005 | 266 | 13 | 55 | 21.018 | P | 0.200 | 0.217  |
| SN37 | 2005 | 266 | 13 | 55 | 21.091 | P | 0.200 | 0.698  |
| SN36 | 2005 | 266 | 13 | 55 | 21.118 | P | 0.200 | 0.524  |
| MNV  | 2005 | 266 | 13 | 55 | 21.245 | P | 0.200 | 0.518  |
| SN22 | 2005 | 266 | 13 | 55 | 21.458 | P | 0.200 | -0.425 |
| SN23 | 2005 | 266 | 13 | 55 | 21.581 | P | 0.200 | 0.000  |
| SN48 | 2005 | 266 | 13 | 55 | 22.739 | P | 0.200 | 0.778  |
| T06C | 2005 | 266 | 13 | 55 | 22.912 | P | 0.200 | -0.965 |
| SN47 | 2005 | 266 | 13 | 55 | 22.972 | P | 0.200 | 0.791  |
| SN46 | 2005 | 266 | 13 | 55 | 23.303 | P | 0.200 | 0.739  |
| SN44 | 2005 | 266 | 13 | 55 | 23.467 | P | 0.200 | -0.057 |
| SN42 | 2005 | 266 | 13 | 55 | 23.579 | P | 0.200 | -0.573 |
| SN45 | 2005 | 266 | 13 | 55 | 23.703 | P | 0.200 | 0.560  |
| SN43 | 2005 | 266 | 13 | 55 | 24.140 | P | 0.200 | -0.276 |
| SN57 | 2005 | 266 | 13 | 55 | 25.016 | P | 0.200 | 0.643  |
| SN52 | 2005 | 266 | 13 | 55 | 25.143 | P | 0.200 | -0.789 |
| R07C | 2005 | 266 | 13 | 55 | 25.255 | P | 0.200 | 0.738  |
| SN56 | 2005 | 266 | 13 | 55 | 25.588 | P | 0.200 | 0.674  |
| SN53 | 2005 | 266 | 13 | 55 | 25.642 | P | 0.200 | -0.211 |
| RAMR | 2005 | 266 | 13 | 55 | 25.806 | P | 0.200 | -0.243 |
| V04C | 2005 | 266 | 13 | 55 | 25.807 | P | 0.200 | -0.245 |
| SN55 | 2005 | 266 | 13 | 55 | 25.907 | P | 0.200 | 0.389  |
| SN54 | 2005 | 266 | 13 | 55 | 25.930 | P | 0.200 | 0.087  |
| SN51 | 2005 | 266 | 13 | 55 | 26.356 | P | 0.200 | -0.626 |
| SN67 | 2005 | 266 | 13 | 55 | 26.721 | P | 0.200 | 0.693  |
| U04C | 2005 | 266 | 13 | 55 | 27.248 | P | 0.200 | -0.891 |
| SN64 | 2005 | 266 | 13 | 55 | 27.361 | P | 0.200 | 0.110  |
| SN66 | 2005 | 266 | 13 | 55 | 27.518 | P | 0.200 | 0.757  |
| SN62 | 2005 | 266 | 13 | 55 | 27.519 | P | 0.200 | -0.539 |
| SN63 | 2005 | 266 | 13 | 55 | 27.529 | P | 0.200 | -0.061 |
| S05C | 2005 | 266 | 13 | 55 | 28.465 | P | 0.200 | -0.496 |

|      |      |     |    |    |        |   |       |        |
|------|------|-----|----|----|--------|---|-------|--------|
| V03C | 2005 | 266 | 13 | 55 | 29.190 | P | 0.200 | -0.527 |
| R06C | 2005 | 266 | 13 | 55 | 29.257 | P | 0.200 | 0.518  |
| SN73 | 2005 | 266 | 13 | 55 | 29.404 | P | 0.200 | -0.297 |
| SN74 | 2005 | 266 | 13 | 55 | 29.494 | P | 0.200 | 0.182  |
| SN71 | 2005 | 266 | 13 | 55 | 30.127 | P | 0.200 | -0.406 |
| SN85 | 2005 | 266 | 13 | 55 | 31.151 | P | 0.200 | 0.391  |
| SN84 | 2005 | 266 | 13 | 55 | 31.410 | P | 0.200 | 0.082  |
| SN86 | 2005 | 266 | 13 | 55 | 31.455 | P | 0.200 | 0.592  |
| CMB  | 2005 | 266 | 13 | 55 | 31.838 | P | 0.200 | -0.261 |
| HAST | 2005 | 266 | 13 | 55 | 32.279 | P | 0.200 | -0.708 |
| SN95 | 2005 | 266 | 13 | 55 | 32.906 | P | 0.200 | 0.204  |
| PACP | 2005 | 266 | 13 | 55 | 33.352 | P | 0.200 | -0.294 |
| R05C | 2005 | 266 | 13 | 55 | 33.945 | P | 0.200 | 0.685  |
| S04C | 2005 | 266 | 13 | 55 | 35.513 | P | 0.200 | -0.064 |
| R04C | 2005 | 266 | 13 | 55 | 36.681 | P | 0.200 | 0.500  |
| MHC  | 2005 | 266 | 13 | 55 | 37.110 | P | 0.200 | 0.003  |
| LAVA | 2005 | 266 | 13 | 55 | 37.322 | P | 0.200 | 0.250  |
| WENL | 2005 | 266 | 13 | 55 | 39.196 | P | 0.200 | 0.549  |
| P05C | 2005 | 266 | 13 | 55 | 39.310 | P | 0.200 | 0.629  |
| JRSC | 2005 | 266 | 13 | 55 | 40.814 | P | 0.200 | 0.040  |
| BDM  | 2005 | 266 | 13 | 55 | 41.242 | P | 0.200 | 0.668  |
| Q04C | 2005 | 266 | 13 | 55 | 41.572 | P | 0.200 | 0.519  |
| BRK  | 2005 | 266 | 13 | 55 | 42.765 | P | 0.200 | 0.176  |
| BKS  | 2005 | 266 | 13 | 55 | 42.922 | P | 0.200 | 0.356  |
| ELFS | 2005 | 266 | 13 | 55 | 44.852 | P | 0.200 | -0.038 |
| ORV  | 2005 | 266 | 13 | 55 | 45.100 | P | 0.200 | 0.539  |
| CVS  | 2005 | 266 | 13 | 55 | 45.541 | P | 0.200 | -0.065 |
| O04C | 2005 | 266 | 13 | 55 | 45.667 | P | 0.200 | 0.072  |
| MNRC | 2005 | 266 | 13 | 55 | 47.804 | P | 0.200 | 0.323  |
| HATC | 2005 | 266 | 13 | 55 | 49.434 | P | 0.200 | -0.264 |
| M05C | 2005 | 266 | 13 | 55 | 49.581 | P | 0.200 | -0.711 |
| GASB | 2005 | 266 | 13 | 55 | 52.656 | P | 0.200 | 0.501  |
| M03C | 2005 | 266 | 13 | 55 | 54.222 | P | 0.200 | -1.024 |
| P01C | 2005 | 266 | 13 | 55 | 55.780 | P | 0.200 | 0.798  |
| M02C | 2005 | 266 | 13 | 55 | 58.348 | P | 0.200 | -1.411 |
| YBH  | 2005 | 266 | 13 | 55 | 58.907 | P | 0.200 | -1.447 |
| N02C | 2005 | 266 | 13 | 55 | 59.120 | P | 0.200 | -0.811 |
| HUMO | 2005 | 266 | 13 | 56 | 3.497  | P | 0.200 | -1.688 |
| JCC  | 2005 | 266 | 13 | 56 | 3.786  | P | 0.200 | -0.094 |
| DBO  | 2005 | 266 | 13 | 56 | 7.838  | P | 0.200 | -0.972 |
| TAKO | 2005 | 266 | 13 | 56 | 15.153 | P | 0.200 | -0.510 |

|      |      |     |    |         |         |           |         |        |        |
|------|------|-----|----|---------|---------|-----------|---------|--------|--------|
| 2006 | 216  | 13  | 41 | 40.4253 | 9.97400 | -70.64900 | 14.6000 | 204    | -0.005 |
| V11A | 2006 | 216 | 13 | 50      | 19.616  | P         | 0.200   | 0.284  |        |
| TUQ  | 2006 | 216 | 13 | 50      | 21.158  | P         | 0.200   | -0.087 |        |
| HEC  | 2006 | 216 | 13 | 50      | 22.294  | P         | 0.200   | 0.336  |        |
| BBR  | 2006 | 216 | 13 | 50      | 24.626  | P         | 0.200   | 0.380  |        |
| SHO  | 2006 | 216 | 13 | 50      | 24.670  | P         | 0.200   | 0.308  |        |
| SVD  | 2006 | 216 | 13 | 50      | 24.965  | P         | 0.200   | 0.218  |        |
| GSC  | 2006 | 216 | 13 | 50      | 26.206  | P         | 0.200   | 0.125  |        |
| TPNV | 2006 | 216 | 13 | 50      | 27.902  | P         | 0.200   | 0.669  |        |
| FUR  | 2006 | 216 | 13 | 50      | 29.750  | P         | 0.200   | 0.471  |        |
| Q11A | 2006 | 216 | 13 | 50      | 29.814  | P         | 0.200   | 0.512  |        |
| SLA  | 2006 | 216 | 13 | 50      | 30.171  | P         | 0.200   | -0.184 |        |
| CHF  | 2006 | 216 | 13 | 50      | 30.688  | P         | 0.200   | -0.374 |        |
| PAS  | 2006 | 216 | 13 | 50      | 31.133  | P         | 0.200   | -0.164 |        |
| VCS  | 2006 | 216 | 13 | 50      | 31.390  | P         | 0.200   | -0.440 |        |
| LRL  | 2006 | 216 | 13 | 50      | 31.663  | P         | 0.200   | -0.044 |        |
| EDW2 | 2006 | 216 | 13 | 50      | 31.743  | P         | 0.200   | -0.332 |        |
| MPM  | 2006 | 216 | 13 | 50      | 31.846  | P         | 0.200   | -0.222 |        |
| DEC  | 2006 | 216 | 13 | 50      | 32.251  | P         | 0.200   | -0.304 |        |
| R10A | 2006 | 216 | 13 | 50      | 32.270  | P         | 0.200   | 0.985  |        |
| DJJ  | 2006 | 216 | 13 | 50      | 32.694  | P         | 0.200   | -0.265 |        |



|      |      |     |    |    |        |   |       |        |
|------|------|-----|----|----|--------|---|-------|--------|
| GRA  | 2006 | 216 | 13 | 50 | 34.191 | P | 0.200 | 0.489  |
| S09A | 2006 | 216 | 13 | 50 | 34.960 | P | 0.200 | 0.049  |
| R09A | 2006 | 216 | 13 | 50 | 35.840 | P | 0.200 | 0.320  |
| TPH  | 2006 | 216 | 13 | 50 | 36.066 | P | 0.200 | 0.197  |
| P10A | 2006 | 216 | 13 | 50 | 36.635 | P | 0.200 | 0.569  |
| CWC  | 2006 | 216 | 13 | 50 | 36.781 | P | 0.200 | 0.330  |
| ISA  | 2006 | 216 | 13 | 50 | 36.894 | P | 0.200 | 0.109  |
| ARV  | 2006 | 216 | 13 | 50 | 37.566 | P | 0.200 | 0.088  |
| TIN  | 2006 | 216 | 13 | 50 | 39.199 | P | 0.200 | 0.473  |
| P09A | 2006 | 216 | 13 | 50 | 39.908 | P | 0.200 | 0.400  |
| S08C | 2006 | 216 | 13 | 50 | 40.467 | P | 0.200 | 0.596  |
| VES  | 2006 | 216 | 13 | 50 | 40.922 | P | 0.200 | 0.379  |
| R08A | 2006 | 216 | 13 | 50 | 41.706 | P | 0.200 | 0.196  |
| Q08A | 2006 | 216 | 13 | 50 | 41.839 | P | 0.200 | 0.015  |
| O09A | 2006 | 216 | 13 | 50 | 41.887 | P | 0.200 | 0.256  |
| RCT  | 2006 | 216 | 13 | 50 | 42.188 | P | 0.200 | -0.447 |
| SN11 | 2006 | 216 | 13 | 50 | 43.220 | P | 0.200 | -0.725 |
| BMN  | 2006 | 216 | 13 | 50 | 42.475 | P | 0.200 | -0.038 |
| HELL | 2006 | 216 | 13 | 50 | 42.574 | P | 0.200 | 0.209  |
| MPP  | 2006 | 216 | 13 | 50 | 42.726 | P | 0.200 | -0.267 |
| SN24 | 2006 | 216 | 13 | 50 | 43.767 | P | 0.200 | 0.042  |
| SN23 | 2006 | 216 | 13 | 50 | 44.593 | P | 0.200 | -0.088 |
| SN34 | 2006 | 216 | 13 | 50 | 44.651 | P | 0.200 | 0.173  |
| SN45 | 2006 | 216 | 13 | 50 | 45.693 | P | 0.200 | 0.295  |
| SN44 | 2006 | 216 | 13 | 50 | 45.837 | P | 0.200 | -0.140 |
| SMM  | 2006 | 216 | 13 | 50 | 44.930 | P | 0.200 | 0.091  |
| SN43 | 2006 | 216 | 13 | 50 | 46.424 | P | 0.200 | -0.489 |
| SDP  | 2006 | 216 | 13 | 50 | 45.552 | P | 0.200 | -0.638 |
| T06C | 2006 | 216 | 13 | 50 | 45.659 | P | 0.200 | -1.276 |
| SN56 | 2006 | 216 | 13 | 50 | 47.009 | P | 0.200 | 0.393  |
| SN52 | 2006 | 216 | 13 | 50 | 47.208 | P | 0.200 | -1.192 |
| SN55 | 2006 | 216 | 13 | 50 | 47.478 | P | 0.200 | 0.130  |
| R07C | 2006 | 216 | 13 | 50 | 46.523 | P | 0.200 | 0.470  |
| SN54 | 2006 | 216 | 13 | 50 | 47.723 | P | 0.200 | -0.069 |
| N08A | 2006 | 216 | 13 | 50 | 47.725 | P | 0.200 | -0.591 |
| SN64 | 2006 | 216 | 13 | 50 | 48.990 | P | 0.200 | 0.054  |
| PHL  | 2006 | 216 | 13 | 50 | 48.042 | P | 0.200 | -0.213 |
| P07A | 2006 | 216 | 13 | 50 | 48.666 | P | 0.200 | -0.169 |
| SN76 | 2006 | 216 | 13 | 50 | 49.690 | P | 0.200 | 0.255  |
| SN74 | 2006 | 216 | 13 | 50 | 50.766 | P | 0.200 | 0.071  |
| R06C | 2006 | 216 | 13 | 50 | 49.802 | P | 0.200 | 0.403  |
| SN73 | 2006 | 216 | 13 | 50 | 50.871 | P | 0.200 | -0.399 |
| S06C | 2006 | 216 | 13 | 50 | 50.002 | P | 0.200 | -0.024 |
| SN71 | 2006 | 216 | 13 | 50 | 51.766 | P | 0.200 | -0.523 |
| SN85 | 2006 | 216 | 13 | 50 | 51.820 | P | 0.200 | 0.179  |
| S05C | 2006 | 216 | 13 | 50 | 50.856 | P | 0.200 | -0.360 |
| U04C | 2006 | 216 | 13 | 50 | 50.889 | P | 0.200 | -0.796 |
| SN84 | 2006 | 216 | 13 | 50 | 52.318 | P | 0.200 | -0.021 |
| SN97 | 2006 | 216 | 13 | 50 | 52.565 | P | 0.200 | 0.442  |
| WCN  | 2006 | 216 | 13 | 50 | 53.500 | P | 0.200 | 0.469  |
| SNA5 | 2006 | 216 | 13 | 50 | 54.684 | P | 0.200 | 0.222  |
| R05C | 2006 | 216 | 13 | 50 | 53.819 | P | 0.200 | 0.401  |
| SNB6 | 2006 | 216 | 13 | 50 | 55.051 | P | 0.200 | 0.251  |
| SNA4 | 2006 | 216 | 13 | 50 | 55.138 | P | 0.200 | -0.063 |
| SN93 | 2006 | 216 | 13 | 50 | 54.436 | P | 0.200 | -0.260 |
| SNA3 | 2006 | 216 | 13 | 50 | 55.756 | P | 0.200 | -0.058 |
| M07A | 2006 | 216 | 13 | 50 | 55.215 | P | 0.200 | -0.242 |
| PACP | 2006 | 216 | 13 | 50 | 55.920 | P | 0.200 | -0.066 |
| N06A | 2006 | 216 | 13 | 50 | 56.299 | P | 0.200 | -0.798 |
| LAVA | 2006 | 216 | 13 | 50 | 56.714 | P | 0.200 | -0.170 |
| SNC4 | 2006 | 216 | 13 | 50 | 57.781 | P | 0.200 | -0.410 |
| R04C | 2006 | 216 | 13 | 50 | 57.107 | P | 0.200 | 0.378  |
| BEK  | 2006 | 216 | 13 | 50 | 57.312 | P | 0.200 | -0.329 |

|      |      |     |    |    |        |   |       |        |
|------|------|-----|----|----|--------|---|-------|--------|
| L07A | 2006 | 216 | 13 | 50 | 58.094 | P | 0.200 | 0.043  |
| P05C | 2006 | 216 | 13 | 50 | 58.184 | P | 0.200 | 0.556  |
| SNC3 | 2006 | 216 | 13 | 50 | 59.374 | P | 0.200 | 0.199  |
| MHC  | 2006 | 216 | 13 | 50 | 58.898 | P | 0.200 | 0.139  |
| SNE4 | 2006 | 216 | 13 | 51 | 1.098  | P | 0.200 | -0.170 |
| WENL | 2006 | 216 | 13 | 51 | 0.450  | P | 0.200 | 0.645  |
| M06C | 2006 | 216 | 13 | 51 | 0.835  | P | 0.200 | -0.813 |
| O05C | 2006 | 216 | 13 | 51 | 0.916  | P | 0.200 | 0.146  |
| Q04C | 2006 | 216 | 13 | 51 | 1.024  | P | 0.200 | 0.561  |
| BDM  | 2006 | 216 | 13 | 51 | 1.683  | P | 0.200 | 0.507  |
| O04C | 2006 | 216 | 13 | 51 | 2.393  | P | 0.200 | -0.245 |
| ORV  | 2006 | 216 | 13 | 51 | 3.076  | P | 0.200 | 0.344  |
| SUTB | 2006 | 216 | 13 | 51 | 3.541  | P | 0.200 | -0.098 |
| L05A | 2006 | 216 | 13 | 51 | 5.168  | P | 0.200 | -0.627 |
| HATC | 2006 | 216 | 13 | 51 | 5.482  | P | 0.200 | -0.304 |
| M05C | 2006 | 216 | 13 | 51 | 5.620  | P | 0.200 | 0.079  |
| M03C | 2006 | 216 | 13 | 51 | 9.616  | P | 0.200 | -0.694 |
| M04C | 2006 | 216 | 13 | 51 | 9.778  | P | 0.200 | -0.321 |
| J05A | 2006 | 216 | 13 | 51 | 10.905 | P | 0.200 | -0.153 |
| K04A | 2006 | 216 | 13 | 51 | 11.539 | P | 0.200 | -0.197 |

|      |     |    |    |        |          |           |         |     |       |
|------|-----|----|----|--------|----------|-----------|---------|-----|-------|
| 2006 | 253 | 14 | 56 | 9.2735 | 26.31900 | -86.60600 | 14.0000 | 215 | 0.001 |
|------|-----|----|----|--------|----------|-----------|---------|-----|-------|

|      |      |     |    |   |        |   |       |        |
|------|------|-----|----|---|--------|---|-------|--------|
| BBR  | 2006 | 253 | 15 | 1 | 53.632 | P | 0.200 | 0.354  |
| GSC  | 2006 | 253 | 15 | 1 | 54.224 | P | 0.200 | 0.320  |
| SVD  | 2006 | 253 | 15 | 1 | 54.528 | P | 0.200 | 0.340  |
| RRX  | 2006 | 253 | 15 | 1 | 55.020 | P | 0.200 | 0.507  |
| VTV  | 2006 | 253 | 15 | 1 | 56.679 | P | 0.200 | 0.153  |
| FUR  | 2006 | 253 | 15 | 1 | 56.977 | P | 0.200 | 0.690  |
| SLA  | 2006 | 253 | 15 | 1 | 58.404 | P | 0.200 | 0.067  |
| BFS  | 2006 | 253 | 15 | 1 | 58.505 | P | 0.200 | -0.066 |
| MPM  | 2006 | 253 | 15 | 2 | 0.209  | P | 0.200 | 0.069  |
| LRL  | 2006 | 253 | 15 | 2 | 0.449  | P | 0.200 | -0.062 |
| MWC  | 2006 | 253 | 15 | 2 | 1.459  | P | 0.200 | -0.092 |
| CHF  | 2006 | 253 | 15 | 2 | 1.506  | P | 0.200 | 0.065  |
| S09A | 2006 | 253 | 15 | 2 | 1.877  | P | 0.200 | 0.176  |
| EDW2 | 2006 | 253 | 15 | 2 | 1.944  | P | 0.200 | 0.129  |
| VCS  | 2006 | 253 | 15 | 2 | 2.064  | P | 0.200 | -0.074 |
| PAS  | 2006 | 253 | 15 | 2 | 2.096  | P | 0.200 | 0.028  |
| R09A | 2006 | 253 | 15 | 2 | 2.464  | P | 0.200 | 0.542  |
| FMP  | 2006 | 253 | 15 | 2 | 2.569  | P | 0.200 | 0.065  |
| TPH  | 2006 | 253 | 15 | 2 | 2.932  | P | 0.200 | 0.431  |
| CIA  | 2006 | 253 | 15 | 2 | 3.201  | P | 0.200 | 0.066  |
| DEC  | 2006 | 253 | 15 | 2 | 3.257  | P | 0.200 | -0.161 |
| DJJ  | 2006 | 253 | 15 | 2 | 4.174  | P | 0.200 | 0.068  |
| CWC  | 2006 | 253 | 15 | 2 | 5.410  | P | 0.200 | 0.385  |
| P09A | 2006 | 253 | 15 | 2 | 6.245  | P | 0.200 | 0.595  |
| OSI  | 2006 | 253 | 15 | 2 | 6.325  | P | 0.200 | -0.444 |
| TOV  | 2006 | 253 | 15 | 2 | 6.549  | P | 0.200 | -0.272 |
| ISA  | 2006 | 253 | 15 | 2 | 6.786  | P | 0.200 | 0.360  |
| TIN  | 2006 | 253 | 15 | 2 | 7.813  | P | 0.200 | 0.702  |
| O09A | 2006 | 253 | 15 | 2 | 8.184  | P | 0.200 | 0.380  |
| ARV  | 2006 | 253 | 15 | 2 | 8.555  | P | 0.200 | 0.455  |
| S08C | 2006 | 253 | 15 | 2 | 8.606  | P | 0.200 | 0.705  |
| BMN  | 2006 | 253 | 15 | 2 | 8.656  | P | 0.200 | -0.082 |
| Q08A | 2006 | 253 | 15 | 2 | 9.193  | P | 0.200 | 0.118  |
| R08A | 2006 | 253 | 15 | 2 | 9.435  | P | 0.200 | 0.336  |
| BAK  | 2006 | 253 | 15 | 2 | 10.618 | P | 0.200 | 0.286  |
| SNCC | 2006 | 253 | 15 | 2 | 11.233 | P | 0.200 | 0.066  |
| VES  | 2006 | 253 | 15 | 2 | 11.645 | P | 0.200 | 0.809  |
| HELL | 2006 | 253 | 15 | 2 | 12.428 | P | 0.200 | 0.429  |
| SCZ2 | 2006 | 253 | 15 | 2 | 12.487 | P | 0.200 | -0.209 |
| RCT  | 2006 | 253 | 15 | 2 | 13.044 | P | 0.200 | 0.270  |
| SBC  | 2006 | 253 | 15 | 2 | 13.315 | P | 0.200 | -0.329 |

|      |      |     |    |   |        |   |       |        |
|------|------|-----|----|---|--------|---|-------|--------|
| MLAC | 2006 | 253 | 15 | 2 | 13.477 | P | 0.200 | 0.890  |
| O08A | 2006 | 253 | 15 | 2 | 14.217 | P | 0.200 | -0.226 |
| MPP  | 2006 | 253 | 15 | 2 | 14.927 | P | 0.200 | -0.190 |
| N08A | 2006 | 253 | 15 | 2 | 15.282 | P | 0.200 | -0.251 |
| R07C | 2006 | 253 | 15 | 2 | 15.557 | P | 0.200 | 0.651  |
| SN43 | 2006 | 253 | 15 | 2 | 16.648 | P | 0.200 | 0.021  |
| SN55 | 2006 | 253 | 15 | 2 | 17.114 | P | 0.200 | 0.487  |
| T06C | 2006 | 253 | 15 | 2 | 16.364 | P | 0.200 | -0.833 |
| V05C | 2006 | 253 | 15 | 2 | 16.777 | P | 0.200 | -0.001 |
| SMM  | 2006 | 253 | 15 | 2 | 17.201 | P | 0.200 | 0.414  |
| P07A | 2006 | 253 | 15 | 2 | 17.444 | P | 0.200 | 0.395  |
| O07A | 2006 | 253 | 15 | 2 | 18.161 | P | 0.200 | -0.440 |
| U05C | 2006 | 253 | 15 | 2 | 18.496 | P | 0.200 | -0.516 |
| R06C | 2006 | 253 | 15 | 2 | 19.103 | P | 0.200 | 0.567  |
| S06C | 2006 | 253 | 15 | 2 | 20.181 | P | 0.200 | 0.211  |
| SNA8 | 2006 | 253 | 15 | 2 | 20.431 | P | 0.200 | -0.403 |
| PKD  | 2006 | 253 | 15 | 2 | 20.502 | P | 0.200 | -0.893 |
| PHL  | 2006 | 253 | 15 | 2 | 20.690 | P | 0.200 | -0.102 |
| SN97 | 2006 | 253 | 15 | 2 | 21.596 | P | 0.200 | -0.024 |
| SNA7 | 2006 | 253 | 15 | 2 | 22.525 | P | 0.200 | -0.188 |
| U04C | 2006 | 253 | 15 | 2 | 22.579 | P | 0.200 | -1.200 |
| WCN  | 2006 | 253 | 15 | 2 | 22.819 | P | 0.200 | 0.521  |
| RAMR | 2006 | 253 | 15 | 2 | 23.176 | P | 0.200 | -0.214 |
| SN96 | 2006 | 253 | 15 | 2 | 23.223 | P | 0.200 | 0.676  |
| T05C | 2006 | 253 | 15 | 2 | 23.369 | P | 0.200 | -0.333 |
| CMB  | 2006 | 253 | 15 | 2 | 23.476 | P | 0.200 | -0.274 |
| SNB7 | 2006 | 253 | 15 | 2 | 24.195 | P | 0.200 | -0.281 |
| R05C | 2006 | 253 | 15 | 2 | 24.870 | P | 0.200 | 1.622  |
| SNA4 | 2006 | 253 | 15 | 2 | 26.087 | P | 0.200 | 0.385  |
| SN93 | 2006 | 253 | 15 | 2 | 25.278 | P | 0.200 | -0.171 |
| N06A | 2006 | 253 | 15 | 2 | 25.493 | P | 0.200 | -0.802 |
| SNA3 | 2006 | 253 | 15 | 2 | 26.874 | P | 0.200 | 0.308  |
| SNB5 | 2006 | 253 | 15 | 2 | 26.880 | P | 0.200 | 0.398  |
| SNC7 | 2006 | 253 | 15 | 2 | 25.915 | P | 0.200 | -0.638 |
| SNC6 | 2006 | 253 | 15 | 2 | 26.288 | P | 0.200 | -0.272 |
| SNF9 | 2006 | 253 | 15 | 2 | 26.975 | P | 0.200 | -1.527 |
| L07A | 2006 | 253 | 15 | 2 | 27.316 | P | 0.200 | 0.542  |
| SND7 | 2006 | 253 | 15 | 2 | 27.491 | P | 0.200 | -0.957 |
| SNB3 | 2006 | 253 | 15 | 2 | 28.767 | P | 0.200 | -0.060 |
| SNC5 | 2006 | 253 | 15 | 2 | 27.768 | P | 0.200 | -0.524 |
| PACP | 2006 | 253 | 15 | 2 | 28.143 | P | 0.200 | -0.124 |
| P05C | 2006 | 253 | 15 | 2 | 28.388 | P | 0.200 | 0.434  |
| SAO  | 2006 | 253 | 15 | 2 | 28.543 | P | 0.200 | -0.430 |
| R04C | 2006 | 253 | 15 | 2 | 28.617 | P | 0.200 | 0.759  |
| SND5 | 2006 | 253 | 15 | 2 | 28.845 | P | 0.200 | -0.878 |
| S04C | 2006 | 253 | 15 | 2 | 29.110 | P | 0.200 | -0.032 |
| SNE6 | 2006 | 253 | 15 | 2 | 29.139 | P | 0.200 | -0.755 |
| SNE5 | 2006 | 253 | 15 | 2 | 30.572 | P | 0.200 | -1.102 |
| SND4 | 2006 | 253 | 15 | 2 | 30.754 | P | 0.200 | -0.194 |
| SNF6 | 2006 | 253 | 15 | 2 | 30.844 | P | 0.200 | -1.153 |
| MHC  | 2006 | 253 | 15 | 2 | 31.360 | P | 0.200 | 0.083  |
| SNE4 | 2006 | 253 | 15 | 2 | 32.382 | P | 0.200 | -0.113 |
| SNC3 | 2006 | 253 | 15 | 2 | 31.415 | P | 0.200 | 1.012  |
| O04C | 2006 | 253 | 15 | 2 | 32.103 | P | 0.200 | -1.199 |
| WENL | 2006 | 253 | 15 | 2 | 33.039 | P | 0.200 | 0.738  |
| Q04C | 2006 | 253 | 15 | 2 | 33.087 | P | 0.200 | 1.227  |
| SNG5 | 2006 | 253 | 15 | 2 | 33.826 | P | 0.200 | -0.901 |
| ORV  | 2006 | 253 | 15 | 2 | 34.404 | P | 0.200 | 0.312  |
| BDM  | 2006 | 253 | 15 | 2 | 34.423 | P | 0.200 | 0.840  |
| BNLO | 2006 | 253 | 15 | 2 | 34.548 | P | 0.200 | 0.025  |
| M05C | 2006 | 253 | 15 | 2 | 35.127 | P | 0.200 | -1.124 |
| JRSC | 2006 | 253 | 15 | 2 | 35.350 | P | 0.200 | 0.093  |
| SUTB | 2006 | 253 | 15 | 2 | 35.623 | P | 0.200 | 0.193  |

|      |      |     |    |   |        |   |       |        |
|------|------|-----|----|---|--------|---|-------|--------|
| L05A | 2006 | 253 | 15 | 2 | 35.909 | P | 0.200 | -0.260 |
| BRIB | 2006 | 253 | 15 | 2 | 36.060 | P | 0.200 | 0.594  |
| BKS  | 2006 | 253 | 15 | 2 | 36.261 | P | 0.200 | 0.187  |
| BRK  | 2006 | 253 | 15 | 2 | 36.280 | P | 0.200 | 0.136  |
| Q03C | 2006 | 253 | 15 | 2 | 36.713 | P | 0.200 | 0.981  |
| O03C | 2006 | 253 | 15 | 2 | 37.611 | P | 0.200 | -0.887 |
| CVS  | 2006 | 253 | 15 | 2 | 38.041 | P | 0.200 | -0.284 |
| MNRC | 2006 | 253 | 15 | 2 | 39.569 | P | 0.200 | 0.451  |
| M04C | 2006 | 253 | 15 | 2 | 40.199 | P | 0.200 | -1.385 |
| J05A | 2006 | 253 | 15 | 2 | 40.937 | P | 0.200 | -1.171 |
| L04A | 2006 | 253 | 15 | 2 | 43.481 | P | 0.200 | 0.470  |
| K04A | 2006 | 253 | 15 | 2 | 43.670 | P | 0.200 | 0.477  |
| HOPS | 2006 | 253 | 15 | 2 | 43.860 | P | 0.200 | 0.395  |
| YBH  | 2006 | 253 | 15 | 2 | 45.707 | P | 0.200 | -1.259 |
| P01C | 2006 | 253 | 15 | 2 | 46.660 | P | 0.200 | 0.480  |
| I03A | 2006 | 253 | 15 | 2 | 54.431 | P | 0.200 | -1.579 |

|      |     |    |    |        |          |           |         |     |       |
|------|-----|----|----|--------|----------|-----------|---------|-----|-------|
| 2006 | 272 | 18 | 23 | 5.7153 | 10.81400 | -61.75800 | 52.0000 | 223 | 0.010 |
|------|-----|----|----|--------|----------|-----------|---------|-----|-------|

|      |      |     |    |    |        |   |       |        |
|------|------|-----|----|----|--------|---|-------|--------|
| V11A | 2006 | 272 | 18 | 32 | 28.339 | P | 0.200 | 0.466  |
| U11A | 2006 | 272 | 18 | 32 | 29.071 | P | 0.200 | 0.420  |
| TUQ  | 2006 | 272 | 18 | 32 | 30.310 | P | 0.200 | 0.157  |
| HEC  | 2006 | 272 | 18 | 32 | 32.092 | P | 0.200 | 0.617  |
| SHO  | 2006 | 272 | 18 | 32 | 33.117 | P | 0.200 | 0.400  |
| Q11A | 2006 | 272 | 18 | 32 | 34.274 | P | 0.200 | -0.149 |
| U10A | 2006 | 272 | 18 | 32 | 34.667 | P | 0.200 | 0.711  |
| BBR  | 2006 | 272 | 18 | 32 | 35.024 | P | 0.200 | 0.775  |
| GSC  | 2006 | 272 | 18 | 32 | 35.421 | P | 0.200 | 0.439  |
| SVD  | 2006 | 272 | 18 | 32 | 35.543 | P | 0.200 | 0.682  |
| VTV  | 2006 | 272 | 18 | 32 | 37.270 | P | 0.200 | 0.345  |
| R10A | 2006 | 272 | 18 | 32 | 37.717 | P | 0.200 | 0.733  |
| BFS  | 2006 | 272 | 18 | 32 | 38.540 | P | 0.200 | 0.074  |
| SLA  | 2006 | 272 | 18 | 32 | 38.682 | P | 0.200 | 0.137  |
| P10A | 2006 | 272 | 18 | 32 | 39.872 | P | 0.200 | -0.381 |
| MPM  | 2006 | 272 | 18 | 32 | 40.296 | P | 0.200 | 0.220  |
| LRL  | 2006 | 272 | 18 | 32 | 40.394 | P | 0.200 | 0.112  |
| CHF  | 2006 | 272 | 18 | 32 | 40.847 | P | 0.200 | 0.084  |
| MWC  | 2006 | 272 | 18 | 32 | 40.892 | P | 0.200 | 0.091  |
| S09A | 2006 | 272 | 18 | 32 | 41.045 | P | 0.200 | -0.115 |
| GRA  | 2006 | 272 | 18 | 32 | 41.101 | P | 0.200 | 0.396  |
| R09A | 2006 | 272 | 18 | 32 | 41.224 | P | 0.200 | 0.012  |
| PAS  | 2006 | 272 | 18 | 32 | 41.350 | P | 0.200 | 0.191  |
| EDW2 | 2006 | 272 | 18 | 32 | 41.393 | P | 0.200 | 0.187  |
| TPH  | 2006 | 272 | 18 | 32 | 41.716 | P | 0.200 | -0.018 |
| DEC  | 2006 | 272 | 18 | 32 | 42.177 | P | 0.200 | -0.098 |
| CIA  | 2006 | 272 | 18 | 32 | 42.186 | P | 0.200 | 0.478  |
| Q09A | 2006 | 272 | 18 | 32 | 42.789 | P | 0.200 | -0.011 |
| DJJ  | 2006 | 272 | 18 | 32 | 43.093 | P | 0.200 | 0.302  |
| P09A | 2006 | 272 | 18 | 32 | 43.530 | P | 0.200 | -0.223 |
| CWC  | 2006 | 272 | 18 | 32 | 44.484 | P | 0.200 | 0.544  |
| OSI  | 2006 | 272 | 18 | 32 | 44.783 | P | 0.200 | -0.255 |
| O09A | 2006 | 272 | 18 | 32 | 44.865 | P | 0.200 | -0.304 |
| ISA  | 2006 | 272 | 18 | 32 | 45.646 | P | 0.200 | 0.629  |
| TIN  | 2006 | 272 | 18 | 32 | 46.079 | P | 0.200 | 0.522  |
| Q08A | 2006 | 272 | 18 | 32 | 46.408 | P | 0.200 | -0.338 |
| ARV  | 2006 | 272 | 18 | 32 | 46.700 | P | 0.200 | 0.498  |
| S08C | 2006 | 272 | 18 | 32 | 46.780 | P | 0.200 | 0.544  |
| R08A | 2006 | 272 | 18 | 32 | 47.012 | P | 0.200 | 0.051  |
| VES  | 2006 | 272 | 18 | 32 | 48.877 | P | 0.200 | 0.369  |
| O08A | 2006 | 272 | 18 | 32 | 49.566 | P | 0.200 | -0.956 |
| HELL | 2006 | 272 | 18 | 32 | 49.674 | P | 0.200 | 0.212  |
| RCT  | 2006 | 272 | 18 | 32 | 49.788 | P | 0.200 | -0.294 |
| MLAC | 2006 | 272 | 18 | 32 | 50.314 | P | 0.200 | 0.402  |
| N08A | 2006 | 272 | 18 | 32 | 50.567 | P | 0.200 | -0.550 |

|      |      |     |    |    |        |   |       |        |
|------|------|-----|----|----|--------|---|-------|--------|
| Q07A | 2006 | 272 | 18 | 32 | 51.612 | P | 0.200 | -0.034 |
| SN43 | 2006 | 272 | 18 | 32 | 52.987 | P | 0.200 | -0.192 |
| R07C | 2006 | 272 | 18 | 32 | 51.991 | P | 0.200 | 0.323  |
| MPP  | 2006 | 272 | 18 | 32 | 52.096 | P | 0.200 | 0.343  |
| SN55 | 2006 | 272 | 18 | 32 | 53.177 | P | 0.200 | 0.036  |
| T06C | 2006 | 272 | 18 | 32 | 52.356 | P | 0.200 | -1.198 |
| V05C | 2006 | 272 | 18 | 32 | 52.944 | P | 0.200 | -0.300 |
| O07A | 2006 | 272 | 18 | 32 | 52.952 | P | 0.200 | -0.961 |
| SMM  | 2006 | 272 | 18 | 32 | 53.786 | P | 0.200 | 0.663  |
| N07B | 2006 | 272 | 18 | 32 | 54.520 | P | 0.200 | -0.905 |
| R06C | 2006 | 272 | 18 | 32 | 55.008 | P | 0.200 | 0.499  |
| SNA8 | 2006 | 272 | 18 | 32 | 56.420 | P | 0.200 | 0.234  |
| S06C | 2006 | 272 | 18 | 32 | 55.822 | P | 0.200 | 0.093  |
| SN97 | 2006 | 272 | 18 | 32 | 57.372 | P | 0.200 | 0.512  |
| PHL  | 2006 | 272 | 18 | 32 | 56.487 | P | 0.200 | 0.159  |
| M07A | 2006 | 272 | 18 | 32 | 56.971 | P | 0.200 | -0.541 |
| SNA7 | 2006 | 272 | 18 | 32 | 58.037 | P | 0.200 | 0.317  |
| S05C | 2006 | 272 | 18 | 32 | 57.149 | P | 0.200 | -0.234 |
| WCN  | 2006 | 272 | 18 | 32 | 57.493 | P | 0.200 | 0.222  |
| P06A | 2006 | 272 | 18 | 32 | 57.707 | P | 0.200 | -0.867 |
| O06A | 2006 | 272 | 18 | 32 | 57.837 | P | 0.200 | -1.033 |
| SN96 | 2006 | 272 | 18 | 32 | 58.248 | P | 0.200 | 0.586  |
| U04C | 2006 | 272 | 18 | 32 | 58.338 | P | 0.200 | -0.432 |
| RAMR | 2006 | 272 | 18 | 32 | 58.363 | P | 0.200 | -0.044 |
| CMB  | 2006 | 272 | 18 | 32 | 58.428 | P | 0.200 | -0.275 |
| SND8 | 2006 | 272 | 18 | 32 | 59.468 | P | 0.200 | -0.726 |
| SNB7 | 2006 | 272 | 18 | 32 | 59.523 | P | 0.200 | 0.462  |
| R05C | 2006 | 272 | 18 | 32 | 58.700 | P | 0.200 | 0.466  |
| N06A | 2006 | 272 | 18 | 32 | 58.793 | P | 0.200 | -1.010 |
| L07A | 2006 | 272 | 18 | 32 | 58.902 | P | 0.200 | -0.523 |
| SNA4 | 2006 | 272 | 18 | 33 | 0.311  | P | 0.200 | 0.152  |
| SNC7 | 2006 | 272 | 18 | 33 | 0.681  | P | 0.200 | -0.005 |
| SN93 | 2006 | 272 | 18 | 32 | 59.856 | P | 0.200 | -0.143 |
| SNC6 | 2006 | 272 | 18 | 33 | 0.916  | P | 0.200 | 0.201  |
| SNB5 | 2006 | 272 | 18 | 33 | 0.926  | P | 0.200 | 0.203  |
| SNA3 | 2006 | 272 | 18 | 33 | 1.024  | P | 0.200 | 0.155  |
| BEK  | 2006 | 272 | 18 | 33 | 0.337  | P | 0.200 | -0.873 |
| SND7 | 2006 | 272 | 18 | 33 | 1.712  | P | 0.200 | -0.353 |
| V03C | 2006 | 272 | 18 | 33 | 0.936  | P | 0.200 | 0.093  |
| SNC5 | 2006 | 272 | 18 | 33 | 2.194  | P | 0.200 | 0.095  |
| SNB3 | 2006 | 272 | 18 | 33 | 2.564  | P | 0.200 | -0.019 |
| SNC4 | 2006 | 272 | 18 | 33 | 2.584  | P | 0.200 | -0.167 |
| LAVA | 2006 | 272 | 18 | 33 | 1.644  | P | 0.200 | 0.074  |
| SNE7 | 2006 | 272 | 18 | 33 | 2.688  | P | 0.200 | -0.366 |
| SND5 | 2006 | 272 | 18 | 33 | 2.960  | P | 0.200 | -0.208 |
| P05C | 2006 | 272 | 18 | 33 | 1.966  | P | 0.200 | 0.201  |
| SNE6 | 2006 | 272 | 18 | 33 | 3.160  | P | 0.200 | -0.053 |
| R04C | 2006 | 272 | 18 | 33 | 2.318  | P | 0.200 | 0.442  |
| PACP | 2006 | 272 | 18 | 33 | 2.627  | P | 0.200 | 0.304  |
| HAST | 2006 | 272 | 18 | 33 | 2.844  | P | 0.200 | -0.171 |
| SAO  | 2006 | 272 | 18 | 33 | 2.908  | P | 0.200 | 0.048  |
| M06C | 2006 | 272 | 18 | 33 | 2.931  | P | 0.200 | -0.877 |
| S04C | 2006 | 272 | 18 | 33 | 3.104  | P | 0.200 | 0.141  |
| SNF6 | 2006 | 272 | 18 | 33 | 4.323  | P | 0.200 | -0.536 |
| SNE5 | 2006 | 272 | 18 | 33 | 4.381  | P | 0.200 | -0.257 |
| ELFS | 2006 | 272 | 18 | 33 | 3.709  | P | 0.200 | -0.572 |
| SND4 | 2006 | 272 | 18 | 33 | 3.847  | P | 0.200 | -0.286 |
| O05C | 2006 | 272 | 18 | 33 | 4.071  | P | 0.200 | -0.094 |
| SNE4 | 2006 | 272 | 18 | 33 | 5.192  | P | 0.200 | -0.153 |
| SNC3 | 2006 | 272 | 18 | 33 | 4.387  | P | 0.200 | 0.556  |
| MHC  | 2006 | 272 | 18 | 33 | 5.153  | P | 0.200 | 0.467  |
| O04C | 2006 | 272 | 18 | 33 | 5.203  | P | 0.200 | -0.440 |
| SNG5 | 2006 | 272 | 18 | 33 | 6.583  | P | 0.200 | -0.406 |

|      |      |     |    |    |        |   |       |        |
|------|------|-----|----|----|--------|---|-------|--------|
| Q04C | 2006 | 272 | 18 | 33 | 5.620  | P | 0.200 | 0.668  |
| WENL | 2006 | 272 | 18 | 33 | 6.205  | P | 0.200 | 0.755  |
| ORV  | 2006 | 272 | 18 | 33 | 6.471  | P | 0.200 | -0.001 |
| BDM  | 2006 | 272 | 18 | 33 | 7.137  | P | 0.200 | 0.673  |
| BNLO | 2006 | 272 | 18 | 33 | 7.468  | P | 0.200 | 0.198  |
| SUTB | 2006 | 272 | 18 | 33 | 7.625  | P | 0.200 | -0.021 |
| HATC | 2006 | 272 | 18 | 33 | 7.730  | P | 0.200 | -0.484 |
| JRSC | 2006 | 272 | 18 | 33 | 8.133  | P | 0.200 | 0.351  |
| K05A | 2006 | 272 | 18 | 33 | 8.213  | P | 0.200 | -0.192 |
| BRIB | 2006 | 272 | 18 | 33 | 8.369  | P | 0.200 | 0.461  |
| BKS  | 2006 | 272 | 18 | 33 | 8.666  | P | 0.200 | 0.258  |
| BRK  | 2006 | 272 | 18 | 33 | 8.698  | P | 0.200 | 0.289  |
| O03C | 2006 | 272 | 18 | 33 | 8.859  | P | 0.200 | -0.994 |
| Q03C | 2006 | 272 | 18 | 33 | 9.062  | P | 0.200 | 1.014  |
| CVS  | 2006 | 272 | 18 | 33 | 10.101 | P | 0.200 | 0.023  |
| J05A | 2006 | 272 | 18 | 33 | 10.725 | P | 0.200 | -0.198 |
| WDC  | 2006 | 272 | 18 | 33 | 10.927 | P | 0.200 | -2.386 |
| MNRC | 2006 | 272 | 18 | 33 | 11.161 | P | 0.200 | 0.529  |
| M04C | 2006 | 272 | 18 | 33 | 11.177 | P | 0.200 | -0.318 |
| M03C | 2006 | 272 | 18 | 33 | 11.460 | P | 0.200 | -0.719 |
| K04A | 2006 | 272 | 18 | 33 | 11.979 | P | 0.200 | -0.279 |
| L04A | 2006 | 272 | 18 | 33 | 12.059 | P | 0.200 | -0.331 |
| FARB | 2006 | 272 | 18 | 33 | 12.186 | P | 0.200 | -0.048 |
| MCCM | 2006 | 272 | 18 | 33 | 12.294 | P | 0.200 | 0.236  |
| O02C | 2006 | 272 | 18 | 33 | 12.311 | P | 0.200 | -1.741 |
| GASB | 2006 | 272 | 18 | 33 | 13.985 | P | 0.200 | 0.857  |
| M02C | 2006 | 272 | 18 | 33 | 14.525 | P | 0.200 | -1.509 |
| HOPS | 2006 | 272 | 18 | 33 | 14.679 | P | 0.200 | 0.686  |
| P01C | 2006 | 272 | 18 | 33 | 16.658 | P | 0.200 | 0.605  |
| O01C | 2006 | 272 | 18 | 33 | 19.757 | P | 0.200 | 0.497  |
| JCC  | 2006 | 272 | 18 | 33 | 21.264 | P | 0.200 | 0.213  |

|      |      |    |    |        |          |           |         |       |       |
|------|------|----|----|--------|----------|-----------|---------|-------|-------|
| 2007 | 35   | 20 | 57 | 0.4787 | 19.37200 | -78.51800 | 10.0000 | 307   | 0.005 |
| HEC  | 2007 | 35 | 21 | 4      | 8.859    | P         | 0.200   | 0.695 |       |
| SHO  | 2007 | 35 | 21 | 4      | 10.803   | P         | 0.200   | 0.624 |       |
| BBR  | 2007 | 35 | 21 | 4      | 12.049   | P         | 0.200   | 0.868 |       |
| SVD  | 2007 | 35 | 21 | 4      | 12.753   | P         | 0.200   | 0.850 |       |
| GSC  | 2007 | 35 | 21 | 4      | 13.006   | P         | 0.200   | 0.522 |       |
| U10A | 2007 | 35 | 21 | 4      | 13.018   | P         | 0.200   | 1.155 |       |
| RRX  | 2007 | 35 | 21 | 4      | 13.671   | P         | 0.200   | 0.900 |       |
| SDD  | 2007 | 35 | 21 | 4      | 15.390   | P         | 0.200   | 0.671 |       |
| FUR  | 2007 | 35 | 21 | 4      | 16.016   | P         | 0.200   | 0.656 |       |
| BFS  | 2007 | 35 | 21 | 4      | 16.430   | P         | 0.200   | 0.326 |       |
| SLA  | 2007 | 35 | 21 | 4      | 17.137   | P         | 0.200   | 0.189 |       |
| R10A | 2007 | 35 | 21 | 4      | 17.449   | P         | 0.200   | 0.841 |       |
| S10A | 2007 | 35 | 21 | 4      | 18.191   | P         | 0.200   | 0.668 |       |
| MPM  | 2007 | 35 | 21 | 4      | 18.866   | P         | 0.200   | 0.128 |       |
| CHF  | 2007 | 35 | 21 | 4      | 19.156   | P         | 0.200   | 0.313 |       |
| MWC  | 2007 | 35 | 21 | 4      | 19.273   | P         | 0.200   | 0.416 |       |
| VCS  | 2007 | 35 | 21 | 4      | 19.862   | P         | 0.200   | 0.275 |       |
| PASC | 2007 | 35 | 21 | 4      | 19.891   | P         | 0.200   | 0.374 |       |
| FMP  | 2007 | 35 | 21 | 4      | 19.918   | P         | 0.200   | 0.541 |       |
| EDW2 | 2007 | 35 | 21 | 4      | 19.943   | P         | 0.200   | 0.374 |       |
| CIA  | 2007 | 35 | 21 | 4      | 20.266   | P         | 0.200   | 0.547 |       |
| GRA  | 2007 | 35 | 21 | 4      | 20.701   | P         | 0.200   | 0.667 |       |
| USC  | 2007 | 35 | 21 | 4      | 20.855   | P         | 0.200   | 1.091 |       |
| DEC  | 2007 | 35 | 21 | 4      | 20.951   | P         | 0.200   | 0.342 |       |
| S09A | 2007 | 35 | 21 | 4      | 21.107   | P         | 0.200   | 0.115 |       |
| DJJ  | 2007 | 35 | 21 | 4      | 21.510   | P         | 0.200   | 0.354 |       |
| P10A | 2007 | 35 | 21 | 4      | 21.627   | P         | 0.200   | 0.244 |       |
| R09A | 2007 | 35 | 21 | 4      | 21.788   | P         | 0.200   | 0.381 |       |
| TPH  | 2007 | 35 | 21 | 4      | 22.150   | P         | 0.200   | 0.266 |       |
| Q09A | 2007 | 35 | 21 | 4      | 23.727   | P         | 0.200   | 0.069 |       |

|      |      |    |    |   |        |   |       |        |
|------|------|----|----|---|--------|---|-------|--------|
| OSI  | 2007 | 35 | 21 | 4 | 23.897 | P | 0.200 | -0.097 |
| CWC  | 2007 | 35 | 21 | 4 | 23.937 | P | 0.200 | 0.455  |
| TOV  | 2007 | 35 | 21 | 4 | 23.984 | P | 0.200 | 0.280  |
| ISA  | 2007 | 35 | 21 | 4 | 24.913 | P | 0.200 | 0.562  |
| P09A | 2007 | 35 | 21 | 4 | 25.578 | P | 0.200 | 0.275  |
| LGU  | 2007 | 35 | 21 | 4 | 25.719 | P | 0.200 | 0.394  |
| ARV  | 2007 | 35 | 21 | 4 | 26.271 | P | 0.200 | 0.715  |
| TIN  | 2007 | 35 | 21 | 4 | 26.350 | P | 0.200 | 0.637  |
| O09A | 2007 | 35 | 21 | 4 | 27.275 | P | 0.200 | -0.176 |
| S08C | 2007 | 35 | 21 | 4 | 27.367 | P | 0.200 | 0.681  |
| SNCC | 2007 | 35 | 21 | 4 | 27.525 | P | 0.200 | 0.487  |
| BMN  | 2007 | 35 | 21 | 4 | 27.736 | P | 0.200 | -0.626 |
| Q08A | 2007 | 35 | 21 | 4 | 28.333 | P | 0.200 | 0.073  |
| R08A | 2007 | 35 | 21 | 4 | 28.348 | P | 0.200 | 0.223  |
| SCZ2 | 2007 | 35 | 21 | 4 | 29.250 | P | 0.200 | 0.199  |
| VES  | 2007 | 35 | 21 | 4 | 29.301 | P | 0.200 | 0.782  |
| SN14 | 2007 | 35 | 21 | 4 | 29.987 | P | 0.200 | 0.271  |
| SBC  | 2007 | 35 | 21 | 4 | 30.275 | P | 0.200 | 0.037  |
| HELL | 2007 | 35 | 21 | 4 | 30.431 | P | 0.200 | 0.374  |
| RCT  | 2007 | 35 | 21 | 4 | 30.631 | P | 0.200 | 0.049  |
| SN12 | 2007 | 35 | 21 | 4 | 31.093 | P | 0.200 | 0.431  |
| P08A | 2007 | 35 | 21 | 4 | 31.334 | P | 0.200 | -0.080 |
| MLAC | 2007 | 35 | 21 | 4 | 31.751 | P | 0.200 | 0.686  |
| MPP  | 2007 | 35 | 21 | 4 | 32.204 | P | 0.200 | 0.275  |
| SN34 | 2007 | 35 | 21 | 4 | 32.446 | P | 0.200 | 0.452  |
| O08A | 2007 | 35 | 21 | 4 | 32.791 | P | 0.200 | -0.871 |
| R07C | 2007 | 35 | 21 | 4 | 33.954 | P | 0.200 | 0.552  |
| N08A | 2007 | 35 | 21 | 4 | 33.966 | P | 0.200 | -0.800 |
| T06C | 2007 | 35 | 21 | 4 | 34.144 | P | 0.200 | -0.890 |
| V05C | 2007 | 35 | 21 | 4 | 34.275 | P | 0.200 | 0.208  |
| SMM  | 2007 | 35 | 21 | 4 | 34.320 | P | 0.200 | 0.587  |
| SN43 | 2007 | 35 | 21 | 4 | 34.582 | P | 0.200 | -0.143 |
| SN55 | 2007 | 35 | 21 | 4 | 35.264 | P | 0.200 | 0.321  |
| U05C | 2007 | 35 | 21 | 4 | 35.895 | P | 0.200 | -0.490 |
| O07A | 2007 | 35 | 21 | 4 | 36.503 | P | 0.200 | -0.982 |
| SN65 | 2007 | 35 | 21 | 4 | 36.616 | P | 0.200 | 0.232  |
| SN64 | 2007 | 35 | 21 | 4 | 37.064 | P | 0.200 | 0.294  |
| SN63 | 2007 | 35 | 21 | 4 | 37.456 | P | 0.200 | 0.024  |
| PKD  | 2007 | 35 | 21 | 4 | 37.604 | P | 0.200 | -0.763 |
| PHL  | 2007 | 35 | 21 | 4 | 37.771 | P | 0.200 | 0.258  |
| SN98 | 2007 | 35 | 21 | 4 | 38.041 | P | 0.200 | 0.346  |
| SN75 | 2007 | 35 | 21 | 4 | 38.116 | P | 0.200 | 0.336  |
| S06C | 2007 | 35 | 21 | 4 | 38.273 | P | 0.200 | 0.257  |
| N07B | 2007 | 35 | 21 | 4 | 38.450 | P | 0.200 | -1.262 |
| S05C | 2007 | 35 | 21 | 4 | 39.517 | P | 0.200 | -0.183 |
| SNA8 | 2007 | 35 | 21 | 4 | 39.565 | P | 0.200 | 0.288  |
| SN86 | 2007 | 35 | 21 | 4 | 39.746 | P | 0.200 | 0.465  |
| SN85 | 2007 | 35 | 21 | 4 | 39.992 | P | 0.200 | 0.376  |
| U04C | 2007 | 35 | 21 | 4 | 39.993 | P | 0.200 | -0.815 |
| V04C | 2007 | 35 | 21 | 4 | 40.054 | P | 0.200 | -0.008 |
| SNB9 | 2007 | 35 | 21 | 4 | 40.146 | P | 0.200 | 0.225  |
| SN84 | 2007 | 35 | 21 | 4 | 40.501 | P | 0.200 | 0.006  |
| T05C | 2007 | 35 | 21 | 4 | 40.807 | P | 0.200 | -0.191 |
| WCN  | 2007 | 35 | 21 | 4 | 40.910 | P | 0.200 | 0.213  |
| SN96 | 2007 | 35 | 21 | 4 | 41.068 | P | 0.200 | 0.432  |
| CMB  | 2007 | 35 | 21 | 4 | 41.387 | P | 0.200 | -0.188 |
| SNA7 | 2007 | 35 | 21 | 4 | 41.500 | P | 0.200 | 0.505  |
| R05C | 2007 | 35 | 21 | 4 | 41.697 | P | 0.200 | 0.305  |
| M07A | 2007 | 35 | 21 | 4 | 41.925 | P | 0.200 | -0.729 |
| SN93 | 2007 | 35 | 21 | 4 | 42.858 | P | 0.200 | -0.330 |
| SNA5 | 2007 | 35 | 21 | 4 | 42.956 | P | 0.200 | 0.297  |
| SNC8 | 2007 | 35 | 21 | 4 | 43.110 | P | 0.200 | 0.081  |
| SNB7 | 2007 | 35 | 21 | 4 | 43.149 | P | 0.200 | 0.517  |

|      |      |     |    |         |          |           |         |        |
|------|------|-----|----|---------|----------|-----------|---------|--------|
| SNB6 | 2007 | 35  | 21 | 4       | 43.338   | P         | 0.200   | 0.447  |
| N06A | 2007 | 35  | 21 | 4       | 43.460   | P         | 0.200   | -1.296 |
| SNA4 | 2007 | 35  | 21 | 4       | 43.639   | P         | 0.200   | 0.078  |
| SND8 | 2007 | 35  | 21 | 4       | 44.256   | P         | 0.200   | -0.084 |
| SNA3 | 2007 | 35  | 21 | 4       | 44.358   | P         | 0.200   | 0.041  |
| SNB5 | 2007 | 35  | 21 | 4       | 44.497   | P         | 0.200   | 0.087  |
| SNC7 | 2007 | 35  | 21 | 4       | 44.796   | P         | 0.200   | 0.147  |
| SNC6 | 2007 | 35  | 21 | 4       | 44.943   | P         | 0.200   | 0.375  |
| SNF9 | 2007 | 35  | 21 | 4       | 44.949   | P         | 0.200   | -1.745 |
| L07A | 2007 | 35  | 21 | 4       | 45.048   | P         | 0.200   | -0.350 |
| HAST | 2007 | 35  | 21 | 4       | 45.113   | P         | 0.200   | -0.678 |
| LAVA | 2007 | 35  | 21 | 4       | 45.168   | P         | 0.200   | -0.183 |
| PACP | 2007 | 35  | 21 | 4       | 45.200   | P         | 0.200   | -0.091 |
| SAO  | 2007 | 35  | 21 | 4       | 45.320   | P         | 0.200   | -0.507 |
| R04C | 2007 | 35  | 21 | 4       | 45.853   | P         | 0.200   | 0.397  |
| SNB3 | 2007 | 35  | 21 | 4       | 46.149   | P         | 0.200   | -0.319 |
| SNC5 | 2007 | 35  | 21 | 4       | 46.267   | P         | 0.200   | 0.112  |
| S04C | 2007 | 35  | 21 | 4       | 46.320   | P         | 0.200   | 0.001  |
| SNC4 | 2007 | 35  | 21 | 4       | 46.324   | P         | 0.200   | -0.506 |
| SNF8 | 2007 | 35  | 21 | 4       | 46.644   | P         | 0.200   | -1.275 |
| SND5 | 2007 | 35  | 21 | 4       | 47.334   | P         | 0.200   | -0.190 |
| SNE6 | 2007 | 35  | 21 | 4       | 47.715   | P         | 0.200   | -0.057 |
| SNC3 | 2007 | 35  | 21 | 4       | 48.022   | P         | 0.200   | 0.037  |
| SND4 | 2007 | 35  | 21 | 4       | 48.092   | P         | 0.200   | -0.499 |
| MHC  | 2007 | 35  | 21 | 4       | 48.298   | P         | 0.200   | 0.058  |
| M06C | 2007 | 35  | 21 | 4       | 48.381   | P         | 0.200   | -1.356 |
| ELFS | 2007 | 35  | 21 | 4       | 48.405   | P         | 0.200   | -1.386 |
| SNE5 | 2007 | 35  | 21 | 4       | 48.973   | P         | 0.200   | -0.410 |
| SNF6 | 2007 | 35  | 21 | 4       | 49.074   | P         | 0.200   | -0.722 |
| Q04C | 2007 | 35  | 21 | 4       | 49.629   | P         | 0.200   | 0.249  |
| SNE4 | 2007 | 35  | 21 | 4       | 49.765   | P         | 0.200   | -0.333 |
| WENL | 2007 | 35  | 21 | 4       | 49.909   | P         | 0.200   | 0.618  |
| BNLO | 2007 | 35  | 21 | 4       | 51.174   | P         | 0.200   | 0.031  |
| BDM  | 2007 | 35  | 21 | 4       | 51.237   | P         | 0.200   | 0.603  |
| SNG5 | 2007 | 35  | 21 | 4       | 51.840   | P         | 0.200   | -0.474 |
| JRSC | 2007 | 35  | 21 | 4       | 51.938   | P         | 0.200   | 0.022  |
| BRIB | 2007 | 35  | 21 | 4       | 52.610   | P         | 0.200   | 0.266  |
| SUTB | 2007 | 35  | 21 | 4       | 52.627   | P         | 0.200   | -0.168 |
| BKS  | 2007 | 35  | 21 | 4       | 52.853   | P         | 0.200   | -0.039 |
| BRK  | 2007 | 35  | 21 | 4       | 52.857   | P         | 0.200   | -0.057 |
| Q03C | 2007 | 35  | 21 | 4       | 53.575   | P         | 0.200   | 0.703  |
| O03C | 2007 | 35  | 21 | 4       | 54.650   | P         | 0.200   | -1.202 |
| CVS  | 2007 | 35  | 21 | 4       | 54.696   | P         | 0.200   | -0.442 |
| MNRC | 2007 | 35  | 21 | 4       | 56.109   | P         | 0.200   | 0.045  |
| K05A | 2007 | 35  | 21 | 4       | 56.301   | P         | 0.200   | -0.018 |
| FARB | 2007 | 35  | 21 | 4       | 56.820   | P         | 0.200   | -0.476 |
| MCCM | 2007 | 35  | 21 | 4       | 57.182   | P         | 0.200   | -0.167 |
| M03C | 2007 | 35  | 21 | 4       | 57.690   | P         | 0.200   | -1.832 |
| M04C | 2007 | 35  | 21 | 4       | 58.749   | P         | 0.200   | -0.341 |
| L04A | 2007 | 35  | 21 | 5       | 0.135    | P         | 0.200   | -0.330 |
| HOPS | 2007 | 35  | 21 | 5       | 0.189    | P         | 0.200   | 0.090  |
| P01C | 2007 | 35  | 21 | 5       | 2.940    | P         | 0.200   | 0.162  |
| O01C | 2007 | 35  | 21 | 5       | 6.875    | P         | 0.200   | -0.092 |
| J03A | 2007 | 35  | 21 | 5       | 6.907    | P         | 0.200   | -2.326 |
| DBO  | 2007 | 35  | 21 | 5       | 8.370    | P         | 0.200   | -1.934 |
| K02A | 2007 | 35  | 21 | 5       | 8.833    | P         | 0.200   | -2.037 |
| L02A | 2007 | 35  | 21 | 5       | 9.977    | P         | 0.200   | -0.066 |
| J02A | 2007 | 35  | 21 | 5       | 11.011   | P         | 0.200   | -1.578 |
| M01C | 2007 | 35  | 21 | 5       | 12.399   | P         | 0.200   | 0.191  |
| K01A | 2007 | 35  | 21 | 5       | 15.815   | P         | 0.200   | -0.492 |
| 2006 | 272  | 13  | 8  | 25.7004 | 10.87600 | -61.75600 | 53.1000 |        |
| V11A | 2006 | 272 | 13 | 17      | 47.961   | P         | 0.200   | 0.474  |
|      |      |     |    |         |          |           | 222     | 0.000  |



|      |      |     |    |    |        |   |       |        |
|------|------|-----|----|----|--------|---|-------|--------|
| U11A | 2006 | 272 | 13 | 17 | 48.789 | P | 0.200 | 0.529  |
| TUQ  | 2006 | 272 | 13 | 17 | 49.987 | P | 0.200 | 0.215  |
| HEC  | 2006 | 272 | 13 | 17 | 51.825 | P | 0.200 | 0.725  |
| SHO  | 2006 | 272 | 13 | 17 | 52.842 | P | 0.200 | 0.509  |
| Q11A | 2006 | 272 | 13 | 17 | 54.027 | P | 0.200 | 0.009  |
| U10A | 2006 | 272 | 13 | 17 | 54.339 | P | 0.200 | 0.771  |
| BBR  | 2006 | 272 | 13 | 17 | 54.763 | P | 0.200 | 0.883  |
| GSC  | 2006 | 272 | 13 | 17 | 55.102 | P | 0.200 | 0.498  |
| SVD  | 2006 | 272 | 13 | 17 | 55.283 | P | 0.200 | 0.790  |
| FUR  | 2006 | 272 | 13 | 17 | 57.223 | P | 0.200 | 0.692  |
| R10A | 2006 | 272 | 13 | 17 | 57.326 | P | 0.200 | 0.742  |
| BFS  | 2006 | 272 | 13 | 17 | 58.230 | P | 0.200 | 0.132  |
| SLA  | 2006 | 272 | 13 | 17 | 58.410 | P | 0.200 | 0.246  |
| P10A | 2006 | 272 | 13 | 17 | 59.772 | P | 0.200 | -0.073 |
| MPM  | 2006 | 272 | 13 | 18 | 0.024  | P | 0.200 | 0.330  |
| LRL  | 2006 | 272 | 13 | 18 | 0.076  | P | 0.200 | 0.171  |
| CHF  | 2006 | 272 | 13 | 18 | 0.538  | P | 0.200 | 0.143  |
| MWC  | 2006 | 272 | 13 | 18 | 0.584  | P | 0.200 | 0.151  |
| S09A | 2006 | 272 | 13 | 18 | 0.760  | P | 0.200 | -0.006 |
| GRA  | 2006 | 272 | 13 | 18 | 0.822  | P | 0.200 | 0.506  |
| PAS  | 2006 | 272 | 13 | 18 | 0.943  | P | 0.200 | 0.150  |
| R09A | 2006 | 272 | 13 | 18 | 0.985  | P | 0.200 | 0.171  |
| VCS  | 2006 | 272 | 13 | 18 | 1.066  | P | 0.200 | 0.064  |
| EDW2 | 2006 | 272 | 13 | 18 | 1.081  | P | 0.200 | 0.247  |
| TPH  | 2006 | 272 | 13 | 18 | 1.429  | P | 0.200 | 0.091  |
| FMP  | 2006 | 272 | 13 | 18 | 1.461  | P | 0.200 | 0.443  |
| CIA  | 2006 | 272 | 13 | 18 | 1.885  | P | 0.200 | 0.536  |
| DEC  | 2006 | 272 | 13 | 18 | 1.920  | P | 0.200 | 0.011  |
| RPV  | 2006 | 272 | 13 | 18 | 2.093  | P | 0.200 | 0.497  |
| Q09A | 2006 | 272 | 13 | 18 | 2.497  | P | 0.200 | 0.098  |
| DJJ  | 2006 | 272 | 13 | 18 | 2.687  | P | 0.200 | 0.260  |
| P09A | 2006 | 272 | 13 | 18 | 3.233  | P | 0.200 | -0.114 |
| CWC  | 2006 | 272 | 13 | 18 | 4.161  | P | 0.200 | 0.604  |
| OSI  | 2006 | 272 | 13 | 18 | 4.425  | P | 0.200 | -0.246 |
| O09A | 2006 | 272 | 13 | 18 | 4.564  | P | 0.200 | -0.195 |
| TOV  | 2006 | 272 | 13 | 18 | 4.665  | P | 0.200 | 0.102  |
| BMN  | 2006 | 272 | 13 | 18 | 4.956  | P | 0.200 | -0.397 |
| ISA  | 2006 | 272 | 13 | 18 | 5.279  | P | 0.200 | 0.638  |
| TIN  | 2006 | 272 | 13 | 18 | 5.751  | P | 0.200 | 0.579  |
| Q08A | 2006 | 272 | 13 | 18 | 6.117  | P | 0.200 | -0.231 |
| ARV  | 2006 | 272 | 13 | 18 | 6.438  | P | 0.200 | 0.607  |
| S08C | 2006 | 272 | 13 | 18 | 6.449  | P | 0.200 | 0.602  |
| R08A | 2006 | 272 | 13 | 18 | 6.676  | P | 0.200 | 0.110  |
| P08A | 2006 | 272 | 13 | 18 | 8.053  | P | 0.200 | -0.482 |
| VES  | 2006 | 272 | 13 | 18 | 8.461  | P | 0.200 | 0.328  |
| SCZ2 | 2006 | 272 | 13 | 18 | 9.131  | P | 0.200 | -0.022 |
| O08A | 2006 | 272 | 13 | 18 | 9.267  | P | 0.200 | -0.847 |
| HELL | 2006 | 272 | 13 | 18 | 9.352  | P | 0.200 | 0.271  |
| RCT  | 2006 | 272 | 13 | 18 | 9.369  | P | 0.200 | -0.335 |
| MLAC | 2006 | 272 | 13 | 18 | 9.935  | P | 0.200 | 0.410  |
| SBC  | 2006 | 272 | 13 | 18 | 10.100 | P | 0.200 | 0.079  |
| N08A | 2006 | 272 | 13 | 18 | 10.265 | P | 0.200 | -0.440 |
| Q07A | 2006 | 272 | 13 | 18 | 11.224 | P | 0.200 | -0.024 |
| P07A | 2006 | 272 | 13 | 18 | 11.610 | P | 0.200 | -0.914 |
| SN43 | 2006 | 272 | 13 | 18 | 12.661 | P | 0.200 | -0.133 |
| R07C | 2006 | 272 | 13 | 18 | 11.709 | P | 0.200 | 0.431  |
| MPP  | 2006 | 272 | 13 | 18 | 11.788 | P | 0.200 | 0.403  |
| SN55 | 2006 | 272 | 13 | 18 | 12.847 | P | 0.200 | 0.095  |
| T06C | 2006 | 272 | 13 | 18 | 12.083 | P | 0.200 | -1.089 |
| O07A | 2006 | 272 | 13 | 18 | 12.557 | P | 0.200 | -0.952 |
| V05C | 2006 | 272 | 13 | 18 | 12.729 | P | 0.200 | -0.141 |
| SMM  | 2006 | 272 | 13 | 18 | 13.426 | P | 0.200 | 0.673  |
| N07B | 2006 | 272 | 13 | 18 | 14.171 | P | 0.200 | -0.848 |

|      |      |     |    |    |        |   |       |        |
|------|------|-----|----|----|--------|---|-------|--------|
| R06C | 2006 | 272 | 13 | 18 | 14.674 | P | 0.200 | 0.555  |
| SNA8 | 2006 | 272 | 13 | 18 | 16.033 | P | 0.200 | 0.241  |
| S06C | 2006 | 272 | 13 | 18 | 15.494 | P | 0.200 | 0.152  |
| PKD  | 2006 | 272 | 13 | 18 | 15.737 | P | 0.200 | -0.765 |
| SN97 | 2006 | 272 | 13 | 18 | 17.037 | P | 0.200 | 0.570  |
| PHL  | 2006 | 272 | 13 | 18 | 16.127 | P | 0.200 | 0.166  |
| M07A | 2006 | 272 | 13 | 18 | 16.669 | P | 0.200 | -0.432 |
| SNA7 | 2006 | 272 | 13 | 18 | 17.702 | P | 0.200 | 0.376  |
| S05C | 2006 | 272 | 13 | 18 | 16.825 | P | 0.200 | -0.176 |
| WCN  | 2006 | 272 | 13 | 18 | 17.105 | P | 0.200 | 0.229  |
| P06A | 2006 | 272 | 13 | 18 | 17.418 | P | 0.200 | -0.758 |
| O06A | 2006 | 272 | 13 | 18 | 17.495 | P | 0.200 | -0.974 |
| SN96 | 2006 | 272 | 13 | 18 | 17.916 | P | 0.200 | 0.644  |
| U04C | 2006 | 272 | 13 | 18 | 17.922 | P | 0.200 | -0.473 |
| RAMR | 2006 | 272 | 13 | 18 | 18.103 | P | 0.200 | 0.065  |
| SNB7 | 2006 | 272 | 13 | 18 | 19.139 | P | 0.200 | 0.472  |
| CMB  | 2006 | 272 | 13 | 18 | 18.200 | P | 0.200 | -0.116 |
| R05C | 2006 | 272 | 13 | 18 | 18.367 | P | 0.200 | 0.525  |
| L07A | 2006 | 272 | 13 | 18 | 18.547 | P | 0.200 | -0.464 |
| N06A | 2006 | 272 | 13 | 18 | 18.547 | P | 0.200 | -0.850 |
| T05C | 2006 | 272 | 13 | 18 | 18.575 | P | 0.200 | 0.279  |
| SND8 | 2006 | 272 | 13 | 18 | 19.579 | P | 0.200 | -0.218 |
| SNA4 | 2006 | 272 | 13 | 18 | 20.030 | P | 0.200 | 0.260  |
| SNC7 | 2006 | 272 | 13 | 18 | 20.345 | P | 0.200 | 0.054  |
| SN93 | 2006 | 272 | 13 | 18 | 19.579 | P | 0.200 | -0.033 |
| SNC6 | 2006 | 272 | 13 | 18 | 20.582 | P | 0.200 | 0.260  |
| SNB5 | 2006 | 272 | 13 | 18 | 20.593 | P | 0.200 | 0.262  |
| SNA3 | 2006 | 272 | 13 | 18 | 20.745 | P | 0.200 | 0.264  |
| BEK  | 2006 | 272 | 13 | 18 | 20.197 | P | 0.200 | -0.614 |
| SND7 | 2006 | 272 | 13 | 18 | 21.474 | P | 0.200 | -0.196 |
| V03C | 2006 | 272 | 13 | 18 | 20.524 | P | 0.200 | 0.052  |
| SNC5 | 2006 | 272 | 13 | 18 | 21.811 | P | 0.200 | 0.104  |
| SNB3 | 2006 | 272 | 13 | 18 | 22.285 | P | 0.200 | 0.090  |
| SNC4 | 2006 | 272 | 13 | 18 | 22.303 | P | 0.200 | -0.059 |
| LAVA | 2006 | 272 | 13 | 18 | 21.313 | P | 0.200 | 0.133  |
| SNE7 | 2006 | 272 | 13 | 18 | 22.450 | P | 0.200 | -0.207 |
| SND5 | 2006 | 272 | 13 | 18 | 22.626 | P | 0.200 | -0.150 |
| P05C | 2006 | 272 | 13 | 18 | 21.631 | P | 0.200 | 0.259  |
| SNE6 | 2006 | 272 | 13 | 18 | 22.874 | P | 0.200 | 0.054  |
| R04C | 2006 | 272 | 13 | 18 | 21.990 | P | 0.200 | 0.501  |
| PACP | 2006 | 272 | 13 | 18 | 22.258 | P | 0.200 | 0.312  |
| HAST | 2006 | 272 | 13 | 18 | 22.530 | P | 0.200 | -0.112 |
| SAO  | 2006 | 272 | 13 | 18 | 22.592 | P | 0.200 | 0.107  |
| M06C | 2006 | 272 | 13 | 18 | 22.634 | P | 0.200 | -0.769 |
| S04C | 2006 | 272 | 13 | 18 | 22.833 | P | 0.200 | 0.250  |
| SNF6 | 2006 | 272 | 13 | 18 | 23.987 | P | 0.200 | -0.479 |
| SNE5 | 2006 | 272 | 13 | 18 | 24.046 | P | 0.200 | -0.201 |
| ELFS | 2006 | 272 | 13 | 18 | 23.266 | P | 0.200 | -0.613 |
| SND4 | 2006 | 272 | 13 | 18 | 23.515 | P | 0.200 | -0.228 |
| O05C | 2006 | 272 | 13 | 18 | 23.733 | P | 0.200 | -0.036 |
| SNE4 | 2006 | 272 | 13 | 18 | 24.860 | P | 0.200 | -0.095 |
| SNC3 | 2006 | 272 | 13 | 18 | 24.107 | P | 0.200 | 0.665  |
| O04C | 2006 | 272 | 13 | 18 | 24.763 | P | 0.200 | -0.483 |
| MHC  | 2006 | 272 | 13 | 18 | 24.833 | P | 0.200 | 0.525  |
| Q04C | 2006 | 272 | 13 | 18 | 25.190 | P | 0.200 | 0.626  |
| SNG5 | 2006 | 272 | 13 | 18 | 26.197 | P | 0.200 | -0.399 |
| WENL | 2006 | 272 | 13 | 18 | 25.834 | P | 0.200 | 0.762  |
| ORV  | 2006 | 272 | 13 | 18 | 26.087 | P | 0.200 | 0.008  |
| L05A | 2006 | 272 | 13 | 18 | 26.336 | P | 0.200 | -0.251 |
| M05C | 2006 | 272 | 13 | 18 | 26.690 | P | 0.200 | -0.349 |
| BDM  | 2006 | 272 | 13 | 18 | 26.814 | P | 0.200 | 0.731  |
| BNLO | 2006 | 272 | 13 | 18 | 27.102 | P | 0.200 | 0.207  |
| SUTB | 2006 | 272 | 13 | 18 | 27.244 | P | 0.200 | -0.012 |

|      |      |     |    |    |        |   |       |        |
|------|------|-----|----|----|--------|---|-------|--------|
| HATC | 2006 | 272 | 13 | 18 | 27.388 | P | 0.200 | -0.424 |
| JRSC | 2006 | 272 | 13 | 18 | 27.665 | P | 0.200 | 0.261  |
| BRIB | 2006 | 272 | 13 | 18 | 27.997 | P | 0.200 | 0.471  |
| K05A | 2006 | 272 | 13 | 18 | 28.008 | P | 0.200 | 0.017  |
| BKS  | 2006 | 272 | 13 | 18 | 28.344 | P | 0.200 | 0.318  |
| BRK  | 2006 | 272 | 13 | 18 | 28.376 | P | 0.200 | 0.348  |
| O03C | 2006 | 272 | 13 | 18 | 28.424 | P | 0.200 | -1.034 |
| Q03C | 2006 | 272 | 13 | 18 | 28.685 | P | 0.200 | 1.024  |
| CVS  | 2006 | 272 | 13 | 18 | 29.677 | P | 0.200 | -0.016 |
| J05A | 2006 | 272 | 13 | 18 | 30.369 | P | 0.200 | -0.136 |
| WDC  | 2006 | 272 | 13 | 18 | 30.589 | P | 0.200 | -2.329 |
| M04C | 2006 | 272 | 13 | 18 | 30.880 | P | 0.200 | -0.210 |
| MNRC | 2006 | 272 | 13 | 18 | 30.884 | P | 0.200 | 0.638  |
| M03C | 2006 | 272 | 13 | 18 | 31.067 | P | 0.200 | -0.712 |
| K04A | 2006 | 272 | 13 | 18 | 31.627 | P | 0.200 | -0.222 |
| L04A | 2006 | 272 | 13 | 18 | 31.710 | P | 0.200 | -0.273 |
| FARB | 2006 | 272 | 13 | 18 | 31.768 | P | 0.200 | -0.090 |
| MCCM | 2006 | 272 | 13 | 18 | 31.873 | P | 0.200 | 0.195  |
| O02C | 2006 | 272 | 13 | 18 | 32.127 | P | 0.200 | -1.532 |
| GASB | 2006 | 272 | 13 | 18 | 33.453 | P | 0.200 | 0.714  |
| YBH  | 2006 | 272 | 13 | 18 | 33.879 | P | 0.200 | -1.488 |
| M02C | 2006 | 272 | 13 | 18 | 34.233 | P | 0.200 | -1.400 |
| HOPS | 2006 | 272 | 13 | 18 | 34.353 | P | 0.200 | 0.746  |
| P01C | 2006 | 272 | 13 | 18 | 36.230 | P | 0.200 | 0.565  |
| N02C | 2006 | 272 | 13 | 18 | 36.307 | P | 0.200 | -0.830 |
| J03A | 2006 | 272 | 13 | 18 | 37.312 | P | 0.200 | -1.350 |
| DBO  | 2006 | 272 | 13 | 18 | 39.043 | P | 0.200 | -0.733 |
| L02A | 2006 | 272 | 13 | 18 | 39.229 | P | 0.200 | -0.993 |
| O01C | 2006 | 272 | 13 | 18 | 39.375 | P | 0.200 | 0.506  |
| K02A | 2006 | 272 | 13 | 18 | 39.595 | P | 0.200 | -0.954 |
| I03A | 2006 | 272 | 13 | 18 | 40.112 | P | 0.200 | -0.915 |
| JCC  | 2006 | 272 | 13 | 18 | 40.929 | P | 0.200 | 0.272  |
| J02A | 2006 | 272 | 13 | 18 | 41.268 | P | 0.200 | -0.282 |
| M01C | 2006 | 272 | 13 | 18 | 42.385 | P | 0.200 | 0.075  |

|      |      |     |    |         |         |           |         |        |       |
|------|------|-----|----|---------|---------|-----------|---------|--------|-------|
| 2007 | 197  | 22  | 58 | 23.3384 | 7.18200 | -72.12600 | 29.5000 | 338    | 0.008 |
| V11A | 2007 | 197 | 23 | 7       | 5.878   | P         | 0.200   | 0.242  |       |
| TUQ  | 2007 | 197 | 23 | 7       | 7.168   | P         | 0.200   | -0.073 |       |
| U11A | 2007 | 197 | 23 | 7       | 7.848   | P         | 0.200   | 0.503  |       |
| HEC  | 2007 | 197 | 23 | 7       | 7.971   | P         | 0.200   | 0.376  |       |
| BBR  | 2007 | 197 | 23 | 7       | 10.004  | P         | 0.200   | 0.539  |       |
| SVD  | 2007 | 197 | 23 | 7       | 10.232  | P         | 0.200   | 0.378  |       |
| SHO  | 2007 | 197 | 23 | 7       | 10.779  | P         | 0.200   | 0.276  |       |
| GSC  | 2007 | 197 | 23 | 7       | 11.967  | P         | 0.200   | 0.139  |       |
| RRX  | 2007 | 197 | 23 | 7       | 11.969  | P         | 0.200   | 0.399  |       |
| BFS  | 2007 | 197 | 23 | 7       | 13.334  | P         | 0.200   | -0.334 |       |
| ADO  | 2007 | 197 | 23 | 7       | 13.380  | P         | 0.200   | 0.227  |       |
| S11A | 2007 | 197 | 23 | 7       | 14.340  | P         | 0.200   | 0.951  |       |
| TPNV | 2007 | 197 | 23 | 7       | 14.563  | P         | 0.200   | 0.689  |       |
| R11A | 2007 | 197 | 23 | 7       | 15.383  | P         | 0.200   | 0.361  |       |
| CIA  | 2007 | 197 | 23 | 7       | 15.941  | P         | 0.200   | 0.251  |       |
| CHF  | 2007 | 197 | 23 | 7       | 16.039  | P         | 0.200   | -0.058 |       |
| FUR  | 2007 | 197 | 23 | 7       | 16.106  | P         | 0.200   | 0.529  |       |
| SLA  | 2007 | 197 | 23 | 7       | 16.169  | P         | 0.200   | -0.124 |       |
| VCS  | 2007 | 197 | 23 | 7       | 16.698  | P         | 0.200   | -0.245 |       |
| RPV  | 2007 | 197 | 23 | 7       | 16.811  | P         | 0.200   | 0.343  |       |
| EDW2 | 2007 | 197 | 23 | 7       | 17.117  | P         | 0.200   | -0.287 |       |
| Q11A | 2007 | 197 | 23 | 7       | 17.367  | P         | 0.200   | 0.420  |       |
| LRL  | 2007 | 197 | 23 | 7       | 17.384  | P         | 0.200   | 0.005  |       |
| DEC  | 2007 | 197 | 23 | 7       | 17.506  | P         | 0.200   | -0.012 |       |
| MPM  | 2007 | 197 | 23 | 7       | 17.781  | P         | 0.200   | -0.277 |       |
| R10A | 2007 | 197 | 23 | 7       | 19.432  | P         | 0.200   | 0.895  |       |
| S10A | 2007 | 197 | 23 | 7       | 19.629  | P         | 0.200   | 0.681  |       |

|      |      |     |    |   |        |   |       |        |
|------|------|-----|----|---|--------|---|-------|--------|
| OSI  | 2007 | 197 | 23 | 7 | 20.315 | P | 0.200 | -0.532 |
| GRA  | 2007 | 197 | 23 | 7 | 20.739 | P | 0.200 | 0.596  |
| LGU  | 2007 | 197 | 23 | 7 | 21.471 | P | 0.200 | 0.095  |
| S09A | 2007 | 197 | 23 | 7 | 21.721 | P | 0.200 | 0.016  |
| ISA  | 2007 | 197 | 23 | 7 | 22.501 | P | 0.200 | 0.106  |
| TPH  | 2007 | 197 | 23 | 7 | 22.735 | P | 0.200 | -0.088 |
| CWC  | 2007 | 197 | 23 | 7 | 22.828 | P | 0.200 | 0.339  |
| R09A | 2007 | 197 | 23 | 7 | 22.864 | P | 0.200 | 0.290  |
| P10A | 2007 | 197 | 23 | 7 | 24.497 | P | 0.200 | 0.626  |
| Q09A | 2007 | 197 | 23 | 7 | 25.237 | P | 0.200 | 0.147  |
| TIN  | 2007 | 197 | 23 | 7 | 25.551 | P | 0.200 | 0.528  |
| SBC  | 2007 | 197 | 23 | 7 | 25.970 | P | 0.200 | -0.014 |
| S08C | 2007 | 197 | 23 | 7 | 27.032 | P | 0.200 | 0.646  |
| P09A | 2007 | 197 | 23 | 7 | 27.593 | P | 0.200 | 0.441  |
| MPP  | 2007 | 197 | 23 | 7 | 27.973 | P | 0.200 | -0.018 |
| RCT  | 2007 | 197 | 23 | 7 | 28.101 | P | 0.200 | -0.295 |
| HELL | 2007 | 197 | 23 | 7 | 28.601 | P | 0.200 | 0.260  |
| R08A | 2007 | 197 | 23 | 7 | 28.715 | P | 0.200 | 0.288  |
| Q08A | 2007 | 197 | 23 | 7 | 29.009 | P | 0.200 | 0.018  |
| O09A | 2007 | 197 | 23 | 7 | 29.825 | P | 0.200 | 0.307  |
| SMM  | 2007 | 197 | 23 | 7 | 30.296 | P | 0.200 | 0.294  |
| MLAC | 2007 | 197 | 23 | 7 | 30.726 | P | 0.200 | 0.507  |
| T06C | 2007 | 197 | 23 | 7 | 31.758 | P | 0.200 | -1.167 |
| P08A | 2007 | 197 | 23 | 7 | 32.756 | P | 0.200 | 0.313  |
| R07C | 2007 | 197 | 23 | 7 | 33.181 | P | 0.200 | 0.532  |
| PHL  | 2007 | 197 | 23 | 7 | 33.307 | P | 0.200 | -0.062 |
| SN55 | 2007 | 197 | 23 | 7 | 33.990 | P | 0.200 | 0.197  |
| PKD  | 2007 | 197 | 23 | 7 | 34.001 | P | 0.200 | -0.683 |
| Q07A | 2007 | 197 | 23 | 7 | 34.198 | P | 0.200 | 0.264  |
| O08A | 2007 | 197 | 23 | 7 | 34.271 | P | 0.200 | -0.655 |
| YO11 | 2007 | 197 | 23 | 7 | 34.373 | P | 0.200 | 0.224  |
| YO10 | 2007 | 197 | 23 | 7 | 34.445 | P | 0.200 | 0.215  |
| YO09 | 2007 | 197 | 23 | 7 | 34.555 | P | 0.200 | 0.081  |
| YO08 | 2007 | 197 | 23 | 7 | 34.770 | P | 0.200 | 0.115  |
| YO07 | 2007 | 197 | 23 | 7 | 34.977 | P | 0.200 | 0.093  |
| YO06 | 2007 | 197 | 23 | 7 | 35.270 | P | 0.200 | 0.112  |
| N08A | 2007 | 197 | 23 | 7 | 35.471 | P | 0.200 | -0.788 |
| SN64 | 2007 | 197 | 23 | 7 | 35.486 | P | 0.200 | 0.156  |
| YO03 | 2007 | 197 | 23 | 7 | 35.525 | P | 0.200 | -0.070 |
| YO02 | 2007 | 197 | 23 | 7 | 35.566 | P | 0.200 | -0.161 |
| YO01 | 2007 | 197 | 23 | 7 | 35.589 | P | 0.200 | -0.081 |
| YO05 | 2007 | 197 | 23 | 7 | 35.589 | P | 0.200 | 0.111  |
| YO04 | 2007 | 197 | 23 | 7 | 35.595 | P | 0.200 | 0.076  |
| SN63 | 2007 | 197 | 23 | 7 | 35.633 | P | 0.200 | -0.113 |
| V04C | 2007 | 197 | 23 | 7 | 35.781 | P | 0.200 | -0.035 |
| P07A | 2007 | 197 | 23 | 7 | 36.137 | P | 0.200 | 0.040  |
| S06C | 2007 | 197 | 23 | 7 | 36.418 | P | 0.200 | 0.034  |
| R06C | 2007 | 197 | 23 | 7 | 36.575 | P | 0.200 | 0.454  |
| U04C | 2007 | 197 | 23 | 7 | 36.653 | P | 0.200 | -0.542 |
| S05C | 2007 | 197 | 23 | 7 | 37.095 | P | 0.200 | -0.151 |
| SN98 | 2007 | 197 | 23 | 7 | 37.327 | P | 0.200 | 0.199  |
| T05C | 2007 | 197 | 23 | 7 | 37.733 | P | 0.200 | -0.169 |
| SN87 | 2007 | 197 | 23 | 7 | 38.145 | P | 0.200 | 0.474  |
| SN86 | 2007 | 197 | 23 | 7 | 38.570 | P | 0.200 | 0.482  |
| V03C | 2007 | 197 | 23 | 7 | 38.876 | P | 0.200 | 0.072  |
| CMB  | 2007 | 197 | 23 | 7 | 39.284 | P | 0.200 | -0.285 |
| SN97 | 2007 | 197 | 23 | 7 | 39.445 | P | 0.200 | 0.544  |
| N07B | 2007 | 197 | 23 | 7 | 39.611 | P | 0.200 | -0.825 |
| SN96 | 2007 | 197 | 23 | 7 | 39.665 | P | 0.200 | 0.468  |
| SNB9 | 2007 | 197 | 23 | 7 | 39.819 | P | 0.200 | 0.385  |
| SNA7 | 2007 | 197 | 23 | 7 | 40.500 | P | 0.200 | 0.484  |
| R05C | 2007 | 197 | 23 | 7 | 40.552 | P | 0.200 | 0.454  |
| WCN  | 2007 | 197 | 23 | 7 | 40.601 | P | 0.200 | 0.573  |

|      |      |     |    |   |        |   |       |        |
|------|------|-----|----|---|--------|---|-------|--------|
| SN93 | 2007 | 197 | 23 | 7 | 40.882 | P | 0.200 | -0.147 |
| HAST | 2007 | 197 | 23 | 7 | 41.176 | P | 0.200 | -0.327 |
| SNA5 | 2007 | 197 | 23 | 7 | 41.394 | P | 0.200 | 0.334  |
| SAO  | 2007 | 197 | 23 | 7 | 41.675 | P | 0.200 | -0.240 |
| PACP | 2007 | 197 | 23 | 7 | 41.740 | P | 0.200 | 0.043  |
| SNA4 | 2007 | 197 | 23 | 7 | 41.749 | P | 0.200 | 0.046  |
| SNB6 | 2007 | 197 | 23 | 7 | 41.777 | P | 0.200 | 0.258  |
| SNA3 | 2007 | 197 | 23 | 7 | 42.333 | P | 0.200 | 0.095  |
| SNB5 | 2007 | 197 | 23 | 7 | 42.901 | P | 0.200 | 0.144  |
| M07A | 2007 | 197 | 23 | 7 | 42.999 | P | 0.200 | -0.430 |
| SND9 | 2007 | 197 | 23 | 7 | 43.028 | P | 0.200 | 0.125  |
| S04C | 2007 | 197 | 23 | 7 | 43.135 | P | 0.200 | 0.074  |
| LAVA | 2007 | 197 | 23 | 7 | 43.348 | P | 0.200 | -0.127 |
| SNC6 | 2007 | 197 | 23 | 7 | 43.419 | P | 0.200 | 0.311  |
| R04C | 2007 | 197 | 23 | 7 | 43.590 | P | 0.200 | 0.534  |
| SND8 | 2007 | 197 | 23 | 7 | 43.611 | P | 0.200 | 0.170  |
| SNC7 | 2007 | 197 | 23 | 7 | 43.770 | P | 0.200 | 0.349  |
| N06A | 2007 | 197 | 23 | 7 | 43.843 | P | 0.200 | -0.835 |
| SNB3 | 2007 | 197 | 23 | 7 | 44.129 | P | 0.200 | -0.090 |
| SNE9 | 2007 | 197 | 23 | 7 | 44.135 | P | 0.200 | -0.322 |
| SNC4 | 2007 | 197 | 23 | 7 | 44.367 | P | 0.200 | -0.409 |
| SNC5 | 2007 | 197 | 23 | 7 | 44.396 | P | 0.200 | -0.024 |
| BEK  | 2007 | 197 | 23 | 7 | 44.640 | P | 0.200 | -0.128 |
| MHC  | 2007 | 197 | 23 | 7 | 44.905 | P | 0.200 | 0.324  |
| P05C | 2007 | 197 | 23 | 7 | 44.927 | P | 0.200 | 0.456  |
| SND7 | 2007 | 197 | 23 | 7 | 45.497 | P | 0.200 | 0.239  |
| SND5 | 2007 | 197 | 23 | 7 | 45.498 | P | 0.200 | -0.206 |
| SNF9 | 2007 | 197 | 23 | 7 | 45.569 | P | 0.200 | -0.332 |
| SNC3 | 2007 | 197 | 23 | 7 | 45.903 | P | 0.200 | 0.235  |
| SND4 | 2007 | 197 | 23 | 7 | 46.049 | P | 0.200 | -0.411 |
| L07A | 2007 | 197 | 23 | 7 | 46.298 | P | 0.200 | 0.051  |
| SNE6 | 2007 | 197 | 23 | 7 | 46.366 | P | 0.200 | 0.179  |
| WENL | 2007 | 197 | 23 | 7 | 46.512 | P | 0.200 | 0.796  |
| SNE7 | 2007 | 197 | 23 | 7 | 46.727 | P | 0.200 | 0.222  |
| SNF8 | 2007 | 197 | 23 | 7 | 46.811 | P | 0.200 | 0.021  |
| BNLO | 2007 | 197 | 23 | 7 | 46.838 | P | 0.200 | -0.044 |
| SNE5 | 2007 | 197 | 23 | 7 | 47.286 | P | 0.200 | -0.172 |
| Q04C | 2007 | 197 | 23 | 7 | 47.530 | P | 0.200 | 0.550  |
| SNF6 | 2007 | 197 | 23 | 7 | 47.815 | P | 0.200 | -0.297 |
| SNE4 | 2007 | 197 | 23 | 7 | 47.828 | P | 0.200 | -0.122 |
| BDM  | 2007 | 197 | 23 | 7 | 47.971 | P | 0.200 | 0.751  |
| O05C | 2007 | 197 | 23 | 7 | 48.180 | P | 0.200 | 0.346  |
| M06C | 2007 | 197 | 23 | 7 | 48.542 | P | 0.200 | -0.751 |
| ELFS | 2007 | 197 | 23 | 7 | 48.639 | P | 0.200 | -0.276 |
| BRIB | 2007 | 197 | 23 | 7 | 49.059 | P | 0.200 | 0.417  |
| BKS  | 2007 | 197 | 23 | 7 | 49.246 | P | 0.200 | 0.177  |
| BRK  | 2007 | 197 | 23 | 7 | 49.275 | P | 0.200 | 0.231  |
| O04C | 2007 | 197 | 23 | 7 | 49.674 | P | 0.200 | -0.140 |
| ORV  | 2007 | 197 | 23 | 7 | 49.863 | P | 0.200 | 0.346  |
| SNG7 | 2007 | 197 | 23 | 7 | 49.906 | P | 0.200 | 0.311  |
| SNG5 | 2007 | 197 | 23 | 7 | 50.061 | P | 0.200 | -0.227 |
| SUTB | 2007 | 197 | 23 | 7 | 50.191 | P | 0.200 | -0.038 |
| Q03C | 2007 | 197 | 23 | 7 | 50.720 | P | 0.200 | 0.944  |
| CVS  | 2007 | 197 | 23 | 7 | 51.303 | P | 0.200 | -0.124 |
| FARB | 2007 | 197 | 23 | 7 | 52.492 | P | 0.200 | -0.185 |
| O03C | 2007 | 197 | 23 | 7 | 52.522 | P | 0.200 | -0.994 |
| HATC | 2007 | 197 | 23 | 7 | 52.749 | P | 0.200 | -0.349 |
| M05C | 2007 | 197 | 23 | 7 | 52.965 | P | 0.200 | -0.142 |
| MCCM | 2007 | 197 | 23 | 7 | 53.024 | P | 0.200 | -0.093 |
| MNRC | 2007 | 197 | 23 | 7 | 53.071 | P | 0.200 | 0.377  |
| L05A | 2007 | 197 | 23 | 7 | 53.296 | P | 0.200 | -0.414 |
| WDC  | 2007 | 197 | 23 | 7 | 55.208 | P | 0.200 | -2.618 |
| K05A | 2007 | 197 | 23 | 7 | 55.904 | P | 0.200 | -0.192 |

|      |      |     |    |   |        |   |       |        |
|------|------|-----|----|---|--------|---|-------|--------|
| O02C | 2007 | 197 | 23 | 7 | 56.113 | P | 0.200 | -1.881 |
| GASB | 2007 | 197 | 23 | 7 | 56.797 | P | 0.200 | 0.499  |
| M03C | 2007 | 197 | 23 | 7 | 57.100 | P | 0.200 | -0.588 |
| M04C | 2007 | 197 | 23 | 7 | 57.465 | P | 0.200 | -0.269 |
| L04A | 2007 | 197 | 23 | 7 | 58.808 | P | 0.200 | -0.403 |
| J05A | 2007 | 197 | 23 | 7 | 59.338 | P | 0.200 | -0.049 |
| P01C | 2007 | 197 | 23 | 7 | 59.560 | P | 0.200 | 0.564  |
| K04A | 2007 | 197 | 23 | 7 | 59.572 | P | 0.200 | -0.146 |
| M02C | 2007 | 197 | 23 | 8 | 0.048  | P | 0.200 | -1.645 |
| YBH  | 2007 | 197 | 23 | 8 | 0.135  | P | 0.200 | -1.776 |
| N02C | 2007 | 197 | 23 | 8 | 1.748  | P | 0.200 | -0.614 |
| O01C | 2007 | 197 | 23 | 8 | 3.652  | P | 0.200 | 0.504  |
| HUMO | 2007 | 197 | 23 | 8 | 4.231  | P | 0.200 | -1.212 |
| I04A | 2007 | 197 | 23 | 8 | 5.471  | P | 0.200 | -0.718 |
| J03A | 2007 | 197 | 23 | 8 | 6.135  | P | 0.200 | -1.356 |
| JCC  | 2007 | 197 | 23 | 8 | 6.154  | P | 0.200 | 0.287  |
| L02A | 2007 | 197 | 23 | 8 | 6.543  | P | 0.200 | -0.779 |
| DBO  | 2007 | 197 | 23 | 8 | 7.537  | P | 0.200 | -0.683 |
| K02A | 2007 | 197 | 23 | 8 | 7.575  | P | 0.200 | -0.928 |
| M01C | 2007 | 197 | 23 | 8 | 9.098  | P | 0.200 | 0.131  |
| J02A | 2007 | 197 | 23 | 8 | 10.036 | P | 0.200 | -0.288 |
| I03A | 2007 | 197 | 23 | 8 | 10.210 | P | 0.200 | -0.499 |
| K01A | 2007 | 197 | 23 | 8 | 13.760 | P | 0.200 | 0.636  |
| TAKO | 2007 | 197 | 23 | 8 | 14.057 | P | 0.200 | 0.252  |

|      |     |   |   |         |          |           |         |     |        |
|------|-----|---|---|---------|----------|-----------|---------|-----|--------|
| 1988 | 255 | 1 | 5 | 37.3909 | 14.65400 | -92.59100 | 83.0000 | 441 | -0.001 |
|------|-----|---|---|---------|----------|-----------|---------|-----|--------|

|     |      |     |   |    |        |   |       |        |
|-----|------|-----|---|----|--------|---|-------|--------|
| arc | 1988 | 255 | 1 | 11 | 50.400 | P | 0.200 | 0.106  |
| bkr | 1988 | 255 | 1 | 11 | 50.750 | P | 0.200 | 0.295  |
| bmd | 1988 | 255 | 1 | 11 | 49.650 | P | 0.200 | 0.109  |
| ccr | 1988 | 255 | 1 | 11 | 56.000 | P | 0.200 | 0.300  |
| jhn | 1988 | 255 | 1 | 11 | 51.300 | P | 0.200 | 0.218  |
| mnk | 1988 | 255 | 1 | 11 | 54.320 | P | 0.200 | 0.214  |
| ndl | 1988 | 255 | 1 | 11 | 51.480 | P | 0.200 | -0.036 |
| pmt | 1988 | 255 | 1 | 11 | 49.580 | P | 0.200 | 0.102  |
| WMD | 1988 | 255 | 1 | 11 | 52.670 | P | 0.200 | 0.028  |
| ARV | 1988 | 255 | 1 | 11 | 48.320 | P | 0.200 | -0.068 |
| BMT | 1988 | 255 | 1 | 11 | 46.860 | P | 0.200 | -0.306 |
| CLC | 1988 | 255 | 1 | 11 | 44.480 | P | 0.200 | -0.257 |
| DTP | 1988 | 255 | 1 | 11 | 43.220 | P | 0.200 | -0.188 |
| ISA | 1988 | 255 | 1 | 11 | 49.090 | P | 0.200 | -0.037 |
| JAW | 1988 | 255 | 1 | 11 | 44.760 | P | 0.200 | -0.039 |
| LRM | 1988 | 255 | 1 | 11 | 43.510 | P | 0.200 | -0.100 |
| SRT | 1988 | 255 | 1 | 11 | 45.180 | P | 0.200 | 0.205  |
| TEJ | 1988 | 255 | 1 | 11 | 47.990 | P | 0.200 | -0.103 |
| TJR | 1988 | 255 | 1 | 11 | 46.930 | P | 0.200 | -0.445 |
| WBM | 1988 | 255 | 1 | 11 | 45.380 | P | 0.200 | 0.009  |
| WBS | 1988 | 255 | 1 | 11 | 46.620 | P | 0.200 | -0.067 |
| WCS | 1988 | 255 | 1 | 11 | 46.770 | P | 0.200 | -0.133 |
| WJP | 1988 | 255 | 1 | 11 | 48.020 | P | 0.200 | 0.078  |
| WRC | 1988 | 255 | 1 | 11 | 45.630 | P | 0.200 | -0.193 |
| WSC | 1988 | 255 | 1 | 11 | 45.620 | P | 0.200 | -0.209 |
| WVP | 1988 | 255 | 1 | 11 | 46.790 | P | 0.200 | -0.064 |
| XMS | 1988 | 255 | 1 | 11 | 41.980 | P | 0.200 | 0.081  |
| TOW | 1988 | 255 | 1 | 11 | 45.920 | P | 0.200 | 0.272  |
| WHV | 1988 | 255 | 1 | 11 | 48.780 | P | 0.200 | 0.228  |

|      |     |    |    |        |          |           |         |     |        |
|------|-----|----|----|--------|----------|-----------|---------|-----|--------|
| 1988 | 170 | 18 | 42 | 6.0643 | 13.58300 | -91.12000 | 60.0000 | 401 | -0.003 |
|------|-----|----|----|--------|----------|-----------|---------|-----|--------|

|     |      |     |    |    |        |   |       |        |
|-----|------|-----|----|----|--------|---|-------|--------|
| twr | 1988 | 170 | 18 | 48 | 38.600 | P | 0.200 | 0.053  |
| bar | 1988 | 170 | 18 | 48 | 40.200 | P | 0.200 | 0.019  |
| cha | 1988 | 170 | 18 | 48 | 38.950 | P | 0.200 | -0.129 |
| cou | 1988 | 170 | 18 | 48 | 38.300 | P | 0.200 | 0.207  |
| jun | 1988 | 170 | 18 | 48 | 39.700 | P | 0.200 | -0.084 |
| BNP | 1988 | 170 | 18 | 48 | 46.900 | P | 0.200 | 0.562  |

|     |      |     |    |    |        |   |       |        |
|-----|------|-----|----|----|--------|---|-------|--------|
| GSC | 1988 | 170 | 18 | 48 | 23.800 | P | 0.200 | -0.025 |
| ISA | 1988 | 170 | 18 | 48 | 35.450 | P | 0.200 | 0.093  |
| WHV | 1988 | 170 | 18 | 48 | 34.950 | P | 0.200 | 0.152  |
| WJP | 1988 | 170 | 18 | 48 | 34.130 | P | 0.200 | -0.070 |
| WOF | 1988 | 170 | 18 | 48 | 36.190 | P | 0.200 | 0.056  |
| BLK | 1988 | 170 | 18 | 48 | 25.300 | P | 0.200 | 0.218  |
| BMT | 1988 | 170 | 18 | 48 | 33.050 | P | 0.200 | -0.402 |
| FLS | 1988 | 170 | 18 | 48 | 23.350 | P | 0.200 | -0.155 |
| HOD | 1988 | 170 | 18 | 48 | 23.750 | P | 0.200 | -0.220 |
| JAW | 1988 | 170 | 18 | 48 | 30.900 | P | 0.200 | -0.164 |
| SBK | 1988 | 170 | 18 | 48 | 27.050 | P | 0.200 | -0.111 |

|      |     |    |    |         |         |           |         |    |       |
|------|-----|----|----|---------|---------|-----------|---------|----|-------|
| 2005 | 355 | 14 | 32 | 40.6113 | 6.62300 | -82.74800 | 10.0000 | 50 | 0.007 |
|------|-----|----|----|---------|---------|-----------|---------|----|-------|

|      |      |     |    |    |        |   |       |        |
|------|------|-----|----|----|--------|---|-------|--------|
| HEC  | 2005 | 355 | 14 | 40 | 30.769 | P | 0.200 | 0.705  |
| TUQ  | 2005 | 355 | 14 | 40 | 30.913 | P | 0.200 | 0.204  |
| BBR  | 2005 | 355 | 14 | 40 | 31.853 | P | 0.200 | 0.924  |
| RRX  | 2005 | 355 | 14 | 40 | 34.647 | P | 0.200 | 0.690  |
| SHO  | 2005 | 355 | 14 | 40 | 35.006 | P | 0.200 | 0.387  |
| GSC  | 2005 | 355 | 14 | 40 | 35.442 | P | 0.200 | 0.554  |
| CIA  | 2005 | 355 | 14 | 40 | 35.925 | P | 0.200 | 0.295  |
| DEC  | 2005 | 355 | 14 | 40 | 39.171 | P | 0.200 | 0.411  |
| EDW2 | 2005 | 355 | 14 | 40 | 39.675 | P | 0.200 | 0.053  |
| TPNV | 2005 | 355 | 14 | 40 | 40.581 | P | 0.200 | 0.953  |
| FUR  | 2005 | 355 | 14 | 40 | 41.015 | P | 0.200 | 0.581  |
| LRL  | 2005 | 355 | 14 | 40 | 41.053 | P | 0.200 | 0.493  |
| MPM  | 2005 | 355 | 14 | 40 | 42.219 | P | 0.200 | 0.044  |
| SCZ2 | 2005 | 355 | 14 | 40 | 45.097 | P | 0.200 | -0.069 |
| ARV  | 2005 | 355 | 14 | 40 | 45.656 | P | 0.200 | 0.444  |
| ISA  | 2005 | 355 | 14 | 40 | 46.158 | P | 0.200 | 0.441  |
| GRA  | 2005 | 355 | 14 | 40 | 46.387 | P | 0.200 | 0.708  |
| CWC  | 2005 | 355 | 14 | 40 | 47.475 | P | 0.200 | 0.438  |
| SBC  | 2005 | 355 | 14 | 40 | 47.720 | P | 0.200 | 0.362  |
| TPH  | 2005 | 355 | 14 | 40 | 50.117 | P | 0.200 | 0.071  |
| VES  | 2005 | 355 | 14 | 40 | 50.178 | P | 0.200 | 0.531  |
| MPP  | 2005 | 355 | 14 | 40 | 50.267 | P | 0.200 | 0.285  |
| TIN  | 2005 | 355 | 14 | 40 | 51.144 | P | 0.200 | 0.664  |
| RCT  | 2005 | 355 | 14 | 40 | 52.446 | P | 0.200 | -0.078 |
| SMM  | 2005 | 355 | 14 | 40 | 53.094 | P | 0.200 | 0.486  |
| HELL | 2005 | 355 | 14 | 40 | 53.487 | P | 0.200 | 0.424  |
| SN11 | 2005 | 355 | 14 | 40 | 54.019 | P | 0.200 | -0.550 |
| SN15 | 2005 | 355 | 14 | 40 | 54.095 | P | 0.200 | 0.440  |
| SN25 | 2005 | 355 | 14 | 40 | 54.760 | P | 0.200 | 0.228  |
| V05C | 2005 | 355 | 14 | 40 | 54.776 | P | 0.200 | 0.429  |
| SN26 | 2005 | 355 | 14 | 40 | 54.784 | P | 0.200 | 0.469  |
| SN28 | 2005 | 355 | 14 | 40 | 54.808 | P | 0.200 | 0.726  |
| SN22 | 2005 | 355 | 14 | 40 | 55.879 | P | 0.200 | -0.454 |
| SN36 | 2005 | 355 | 14 | 40 | 55.965 | P | 0.200 | 0.198  |
| SN23 | 2005 | 355 | 14 | 40 | 56.198 | P | 0.200 | 0.018  |
| SN37 | 2005 | 355 | 14 | 40 | 56.295 | P | 0.200 | 0.630  |
| SN38 | 2005 | 355 | 14 | 40 | 56.372 | P | 0.200 | 0.623  |
| SN34 | 2005 | 355 | 14 | 40 | 56.729 | P | 0.200 | 0.160  |
| MNV  | 2005 | 355 | 14 | 40 | 56.813 | P | 0.200 | 0.370  |
| T06C | 2005 | 355 | 14 | 40 | 56.968 | P | 0.200 | -1.091 |
| U05C | 2005 | 355 | 14 | 40 | 57.080 | P | 0.200 | -0.388 |
| SN48 | 2005 | 355 | 14 | 40 | 57.814 | P | 0.200 | 0.495  |
| SN47 | 2005 | 355 | 14 | 40 | 57.831 | P | 0.200 | 0.458  |
| PKD  | 2005 | 355 | 14 | 40 | 57.863 | P | 0.200 | -0.318 |
| SN44 | 2005 | 355 | 14 | 40 | 58.147 | P | 0.200 | -0.060 |
| SN45 | 2005 | 355 | 14 | 40 | 58.228 | P | 0.200 | 0.202  |
| SN43 | 2005 | 355 | 14 | 40 | 58.591 | P | 0.200 | -0.320 |
| RAMR | 2005 | 355 | 14 | 40 | 58.820 | P | 0.200 | 0.013  |
| V04C | 2005 | 355 | 14 | 40 | 58.821 | P | 0.200 | 0.010  |
| SN52 | 2005 | 355 | 14 | 40 | 59.076 | P | 0.200 | -1.067 |

|      |      |     |    |    |        |   |       |        |
|------|------|-----|----|----|--------|---|-------|--------|
| SN53 | 2005 | 355 | 14 | 40 | 59.531 | P | 0.200 | -0.687 |
| SN57 | 2005 | 355 | 14 | 40 | 59.789 | P | 0.200 | 0.359  |
| R07C | 2005 | 355 | 14 | 41 | 0.007  | P | 0.200 | 0.508  |
| SN51 | 2005 | 355 | 14 | 41 | 0.228  | P | 0.200 | -0.773 |
| SN54 | 2005 | 355 | 14 | 41 | 0.301  | P | 0.200 | -0.092 |
| SN55 | 2005 | 355 | 14 | 41 | 0.349  | P | 0.200 | 0.106  |
| U04C | 2005 | 355 | 14 | 41 | 0.845  | P | 0.200 | -0.382 |
| SN62 | 2005 | 355 | 14 | 41 | 1.484  | P | 0.200 | -0.709 |
| V03C | 2005 | 355 | 14 | 41 | 2.291  | P | 0.200 | -0.067 |
| S05C | 2005 | 355 | 14 | 41 | 2.412  | P | 0.200 | -0.367 |
| T05C | 2005 | 355 | 14 | 41 | 2.504  | P | 0.200 | -0.249 |
| S06C | 2005 | 355 | 14 | 41 | 2.640  | P | 0.200 | -0.109 |
| SN73 | 2005 | 355 | 14 | 41 | 3.356  | P | 0.200 | -0.488 |
| SN76 | 2005 | 355 | 14 | 41 | 3.468  | P | 0.200 | 0.240  |
| R06C | 2005 | 355 | 14 | 41 | 3.911  | P | 0.200 | 0.375  |
| SN71 | 2005 | 355 | 14 | 41 | 3.960  | P | 0.200 | -0.462 |
| HAST | 2005 | 355 | 14 | 41 | 5.091  | P | 0.200 | -0.467 |
| SN85 | 2005 | 355 | 14 | 41 | 5.188  | P | 0.200 | 0.046  |
| CMB  | 2005 | 355 | 14 | 41 | 5.694  | P | 0.200 | -0.421 |
| SN86 | 2005 | 355 | 14 | 41 | 5.696  | P | 0.200 | 0.304  |
| SAO  | 2005 | 355 | 14 | 41 | 6.074  | P | 0.200 | -0.418 |
| PACP | 2005 | 355 | 14 | 41 | 6.509  | P | 0.200 | -0.125 |
| R05C | 2005 | 355 | 14 | 41 | 7.987  | P | 0.200 | 0.316  |
| S04C | 2005 | 355 | 14 | 41 | 8.661  | P | 0.200 | -0.066 |
| MHC  | 2005 | 355 | 14 | 41 | 10.166 | P | 0.200 | 0.205  |
| R04C | 2005 | 355 | 14 | 41 | 10.292 | P | 0.200 | 0.477  |
| LAVA | 2005 | 355 | 14 | 41 | 10.798 | P | 0.200 | -0.205 |
| BNLO | 2005 | 355 | 14 | 41 | 11.808 | P | 0.200 | -0.128 |
| WENL | 2005 | 355 | 14 | 41 | 12.111 | P | 0.200 | 0.627  |
| P05C | 2005 | 355 | 14 | 41 | 12.941 | P | 0.200 | 0.160  |
| BDM  | 2005 | 355 | 14 | 41 | 14.030 | P | 0.200 | 0.567  |
| Q04C | 2005 | 355 | 14 | 41 | 14.857 | P | 0.200 | 0.321  |
| BRIB | 2005 | 355 | 14 | 41 | 15.141 | P | 0.200 | 0.332  |
| BRK  | 2005 | 355 | 14 | 41 | 15.234 | P | 0.200 | 0.103  |
| O05C | 2005 | 355 | 14 | 41 | 17.242 | P | 0.200 | 0.161  |
| CVS  | 2005 | 355 | 14 | 41 | 17.759 | P | 0.200 | -0.399 |
| Q03C | 2005 | 355 | 14 | 41 | 17.777 | P | 0.200 | 0.800  |
| SUTB | 2005 | 355 | 14 | 41 | 17.820 | P | 0.200 | -0.434 |
| ORV  | 2005 | 355 | 14 | 41 | 18.346 | P | 0.200 | 0.261  |
| ELFS | 2005 | 355 | 14 | 41 | 18.832 | P | 0.200 | -0.291 |
| O04C | 2005 | 355 | 14 | 41 | 19.171 | P | 0.200 | -0.359 |
| M06C | 2005 | 355 | 14 | 41 | 19.582 | P | 0.200 | -0.790 |
| MNRC | 2005 | 355 | 14 | 41 | 20.328 | P | 0.200 | 0.142  |
| HATC | 2005 | 355 | 14 | 41 | 22.889 | P | 0.200 | -0.546 |
| M05C | 2005 | 355 | 14 | 41 | 23.390 | P | 0.200 | -0.883 |
| WDC  | 2005 | 355 | 14 | 41 | 24.844 | P | 0.200 | -2.824 |
| GASB | 2005 | 355 | 14 | 41 | 25.214 | P | 0.200 | 0.368  |
| M03C | 2005 | 355 | 14 | 41 | 27.128 | P | 0.200 | -1.455 |
| P01C | 2005 | 355 | 14 | 41 | 27.406 | P | 0.200 | 0.198  |
| M04C | 2005 | 355 | 14 | 41 | 28.561 | P | 0.200 | -0.861 |
| YBH  | 2005 | 355 | 14 | 41 | 31.013 | P | 0.200 | -2.324 |
| O01C | 2005 | 355 | 14 | 41 | 32.432 | P | 0.200 | 0.192  |
| JCC  | 2005 | 355 | 14 | 41 | 35.847 | P | 0.200 | -0.038 |
| DBO  | 2005 | 355 | 14 | 41 | 40.510 | P | 0.200 | -0.985 |
| I03A | 2005 | 355 | 14 | 41 | 44.207 | P | 0.200 | -0.985 |

|      |      |    |    |         |          |           |         |        |        |
|------|------|----|----|---------|----------|-----------|---------|--------|--------|
| 2006 | 51   | 6  | 56 | 10.4852 | 13.16400 | -87.56100 | 10.0000 | 114    | -0.012 |
| HEC  | 2006 | 51 | 7  | 2       | 52.757   | P         | 0.200   | 0.144  |        |
| SVD  | 2006 | 51 | 7  | 2       | 54.148   | P         | 0.200   | 0.178  |        |
| BBR  | 2006 | 51 | 7  | 2       | 54.355   | P         | 0.200   | 0.594  |        |
| VTV  | 2006 | 51 | 7  | 2       | 57.090   | P         | 0.200   | -0.405 |        |
| RRX  | 2006 | 51 | 7  | 2       | 57.096   | P         | 0.200   | 0.274  |        |
| GSC  | 2006 | 51 | 7  | 2       | 57.624   | P         | 0.200   | -0.070 |        |



|      |      |    |   |   |        |   |       |        |
|------|------|----|---|---|--------|---|-------|--------|
| ADO  | 2006 | 51 | 7 | 2 | 57.981 | P | 0.200 | -0.077 |
| BFS  | 2006 | 51 | 7 | 2 | 57.985 | P | 0.200 | -0.184 |
| MWC  | 2006 | 51 | 7 | 3 | 0.339  | P | 0.200 | -0.244 |
| PAS  | 2006 | 51 | 7 | 3 | 0.517  | P | 0.200 | -0.281 |
| CHF  | 2006 | 51 | 7 | 3 | 0.761  | P | 0.200 | -0.086 |
| VCS  | 2006 | 51 | 7 | 3 | 1.627  | P | 0.200 | -0.334 |
| DEC  | 2006 | 51 | 7 | 3 | 2.423  | P | 0.200 | 0.134  |
| DJJ  | 2006 | 51 | 7 | 3 | 2.452  | P | 0.200 | 0.031  |
| EDW2 | 2006 | 51 | 7 | 3 | 2.704  | P | 0.200 | -0.272 |
| SLA  | 2006 | 51 | 7 | 3 | 2.842  | P | 0.200 | -0.421 |
| FUR  | 2006 | 51 | 7 | 3 | 3.585  | P | 0.200 | 0.205  |
| LRL  | 2006 | 51 | 7 | 3 | 3.854  | P | 0.200 | 0.067  |
| TOV  | 2006 | 51 | 7 | 3 | 4.836  | P | 0.200 | -0.024 |
| MPM  | 2006 | 51 | 7 | 3 | 5.074  | P | 0.200 | -0.263 |
| OSI  | 2006 | 51 | 7 | 3 | 6.261  | P | 0.200 | 0.002  |
| ARV  | 2006 | 51 | 7 | 3 | 9.298  | P | 0.200 | 0.299  |
| GRA  | 2006 | 51 | 7 | 3 | 9.448  | P | 0.200 | 0.536  |
| ISA  | 2006 | 51 | 7 | 3 | 9.594  | P | 0.200 | 0.272  |
| CWC  | 2006 | 51 | 7 | 3 | 10.636 | P | 0.200 | 0.115  |
| BAK  | 2006 | 51 | 7 | 3 | 11.641 | P | 0.200 | 0.027  |
| VES  | 2006 | 51 | 7 | 3 | 14.015 | P | 0.200 | 0.467  |
| MPP  | 2006 | 51 | 7 | 3 | 14.303 | P | 0.200 | 0.050  |
| TIN  | 2006 | 51 | 7 | 3 | 14.541 | P | 0.200 | 0.435  |
| SN16 | 2006 | 51 | 7 | 3 | 16.017 | P | 0.200 | 0.250  |
| S08C | 2006 | 51 | 7 | 3 | 16.542 | P | 0.200 | 0.378  |
| HELL | 2006 | 51 | 7 | 3 | 17.302 | P | 0.200 | 0.288  |
| SMM  | 2006 | 51 | 7 | 3 | 17.366 | P | 0.200 | 0.404  |
| SN15 | 2006 | 51 | 7 | 3 | 17.834 | P | 0.200 | 0.372  |
| SN28 | 2006 | 51 | 7 | 3 | 18.398 | P | 0.200 | 0.608  |
| SN26 | 2006 | 51 | 7 | 3 | 18.415 | P | 0.200 | 0.288  |
| SN25 | 2006 | 51 | 7 | 3 | 18.607 | P | 0.200 | 0.195  |
| V05C | 2006 | 51 | 7 | 3 | 19.210 | P | 0.200 | 0.563  |
| SN21 | 2006 | 51 | 7 | 3 | 19.373 | P | 0.200 | -0.963 |
| SN36 | 2006 | 51 | 7 | 3 | 19.781 | P | 0.200 | 0.122  |
| SN37 | 2006 | 51 | 7 | 3 | 20.038 | P | 0.200 | 0.495  |
| SN38 | 2006 | 51 | 7 | 3 | 20.121 | P | 0.200 | 0.529  |
| SN22 | 2006 | 51 | 7 | 3 | 20.181 | P | 0.200 | -0.278 |
| SN23 | 2006 | 51 | 7 | 3 | 20.345 | P | 0.200 | 0.098  |
| MLAC | 2006 | 51 | 7 | 3 | 20.502 | P | 0.200 | 0.125  |
| PHL  | 2006 | 51 | 7 | 3 | 20.591 | P | 0.200 | -0.077 |
| MNV  | 2006 | 51 | 7 | 3 | 20.698 | P | 0.200 | 0.451  |
| SN34 | 2006 | 51 | 7 | 3 | 20.789 | P | 0.200 | 0.175  |
| T06C | 2006 | 51 | 7 | 3 | 21.330 | P | 0.200 | -1.024 |
| U05C | 2006 | 51 | 7 | 3 | 21.639 | P | 0.200 | -0.273 |
| SN48 | 2006 | 51 | 7 | 3 | 21.870 | P | 0.200 | 0.617  |
| SN47 | 2006 | 51 | 7 | 3 | 21.879 | P | 0.200 | 0.526  |
| SN44 | 2006 | 51 | 7 | 3 | 22.267 | P | 0.200 | -0.079 |
| PKD  | 2006 | 51 | 7 | 3 | 22.663 | P | 0.200 | -0.127 |
| SN52 | 2006 | 51 | 7 | 3 | 23.570 | P | 0.200 | -0.948 |
| V04C | 2006 | 51 | 7 | 3 | 23.731 | P | 0.200 | 0.148  |
| SN53 | 2006 | 51 | 7 | 3 | 24.030 | P | 0.200 | -0.519 |
| SN57 | 2006 | 51 | 7 | 3 | 24.065 | P | 0.200 | 0.538  |
| R07C | 2006 | 51 | 7 | 3 | 24.158 | P | 0.200 | 0.524  |
| SN54 | 2006 | 51 | 7 | 3 | 24.506 | P | 0.200 | -0.173 |
| SN55 | 2006 | 51 | 7 | 3 | 24.594 | P | 0.200 | 0.135  |
| SN51 | 2006 | 51 | 7 | 3 | 24.675 | P | 0.200 | -0.791 |
| U04C | 2006 | 51 | 7 | 3 | 25.726 | P | 0.200 | -0.280 |
| SN62 | 2006 | 51 | 7 | 3 | 25.841 | P | 0.200 | -0.843 |
| S05C | 2006 | 51 | 7 | 3 | 26.843 | P | 0.200 | -0.546 |
| T05C | 2006 | 51 | 7 | 3 | 27.160 | P | 0.200 | -0.332 |
| S06C | 2006 | 51 | 7 | 3 | 27.213 | P | 0.200 | 0.012  |
| V03C | 2006 | 51 | 7 | 3 | 27.436 | P | 0.200 | 0.101  |
| SN73 | 2006 | 51 | 7 | 3 | 27.990 | P | 0.200 | -0.406 |

|      |      |    |   |   |        |   |       |        |
|------|------|----|---|---|--------|---|-------|--------|
| SN76 | 2006 | 51 | 7 | 3 | 28.064 | P | 0.200 | 0.460  |
| R06C | 2006 | 51 | 7 | 3 | 28.458 | P | 0.200 | 0.554  |
| SN71 | 2006 | 51 | 7 | 3 | 28.555 | P | 0.200 | -0.532 |
| SN85 | 2006 | 51 | 7 | 3 | 29.964 | P | 0.200 | 0.277  |
| HAST | 2006 | 51 | 7 | 3 | 30.250 | P | 0.200 | -0.436 |
| CMB  | 2006 | 51 | 7 | 3 | 30.378 | P | 0.200 | -0.433 |
| SAO  | 2006 | 51 | 7 | 3 | 31.052 | P | 0.200 | -0.534 |
| PACP | 2006 | 51 | 7 | 3 | 31.315 | P | 0.200 | -0.353 |
| R05C | 2006 | 51 | 7 | 3 | 32.882 | P | 0.200 | 0.561  |
| S04C | 2006 | 51 | 7 | 3 | 33.721 | P | 0.200 | -0.089 |
| MHC  | 2006 | 51 | 7 | 3 | 35.313 | P | 0.200 | 0.140  |
| R04C | 2006 | 51 | 7 | 3 | 35.502 | P | 0.200 | 0.700  |
| LAVA | 2006 | 51 | 7 | 3 | 35.989 | P | 0.200 | 0.029  |
| BNLO | 2006 | 51 | 7 | 3 | 37.348 | P | 0.200 | -0.029 |
| WENL | 2006 | 51 | 7 | 3 | 37.583 | P | 0.200 | 0.796  |
| P05C | 2006 | 51 | 7 | 3 | 38.215 | P | 0.200 | 0.426  |
| BEK  | 2006 | 51 | 7 | 3 | 38.947 | P | 0.200 | -0.034 |
| JRSC | 2006 | 51 | 7 | 3 | 39.078 | P | 0.200 | 0.386  |
| BDM  | 2006 | 51 | 7 | 3 | 39.632 | P | 0.200 | 0.802  |
| Q04C | 2006 | 51 | 7 | 3 | 40.291 | P | 0.200 | 0.507  |
| BRIB | 2006 | 51 | 7 | 3 | 40.923 | P | 0.200 | 0.620  |
| BKS  | 2006 | 51 | 7 | 3 | 40.929 | P | 0.200 | 0.262  |
| BRK  | 2006 | 51 | 7 | 3 | 41.063 | P | 0.200 | 0.379  |
| O05C | 2006 | 51 | 7 | 3 | 42.671 | P | 0.200 | 0.346  |
| Q03C | 2006 | 51 | 7 | 3 | 43.368 | P | 0.200 | 0.902  |
| SUTB | 2006 | 51 | 7 | 3 | 43.541 | P | 0.200 | -0.191 |
| CVS  | 2006 | 51 | 7 | 3 | 43.622 | P | 0.200 | -0.211 |
| ORV  | 2006 | 51 | 7 | 3 | 43.945 | P | 0.200 | 0.441  |
| ELFS | 2006 | 51 | 7 | 3 | 44.275 | P | 0.200 | -0.139 |
| FARB | 2006 | 51 | 7 | 3 | 44.320 | P | 0.200 | -0.032 |
| O04C | 2006 | 51 | 7 | 3 | 44.942 | P | 0.200 | 0.026  |
| MNRC | 2006 | 51 | 7 | 3 | 46.343 | P | 0.200 | 0.417  |
| M05C | 2006 | 51 | 7 | 3 | 49.074 | P | 0.200 | -0.857 |
| GASB | 2006 | 51 | 7 | 3 | 51.205 | P | 0.200 | 0.395  |
| O02C | 2006 | 51 | 7 | 3 | 51.208 | P | 0.200 | -2.142 |
| P01C | 2006 | 51 | 7 | 3 | 53.996 | P | 0.200 | 0.594  |
| M04C | 2006 | 51 | 7 | 3 | 54.568 | P | 0.200 | -0.877 |
| YBH  | 2006 | 51 | 7 | 3 | 57.247 | P | 0.200 | -2.456 |
| I03A | 2006 | 51 | 7 | 4 | 10.900 | P | 0.200 | -1.462 |
| K01A | 2006 | 51 | 7 | 4 | 13.108 | P | 0.200 | -0.043 |
| TAKO | 2006 | 51 | 7 | 4 | 14.626 | P | 0.200 | -0.622 |

|      |      |     |    |         |         |           |         |       |       |
|------|------|-----|----|---------|---------|-----------|---------|-------|-------|
| 2005 | 239  | 18  | 38 | 20.7489 | 6.81700 | -82.43200 | 10.0000 | 16    | 0.011 |
| HEC  | 2005 | 239 | 18 | 46      | 11.519  | P         | 0.200   | 0.704 |       |
| TUQ  | 2005 | 239 | 18 | 46      | 11.610  | P         | 0.200   | 0.200 |       |
| SVD  | 2005 | 239 | 18 | 46      | 12.932  | P         | 0.200   | 1.060 |       |
| RRX  | 2005 | 239 | 18 | 46      | 15.415  | P         | 0.200   | 0.690 |       |
| SHO  | 2005 | 239 | 18 | 46      | 15.534  | P         | 0.200   | 0.233 |       |
| VTV  | 2005 | 239 | 18 | 46      | 15.838  | P         | 0.200   | 0.567 |       |
| GSC  | 2005 | 239 | 18 | 46      | 16.076  | P         | 0.200   | 0.449 |       |
| BFS  | 2005 | 239 | 18 | 46      | 16.252  | P         | 0.200   | 0.440 |       |
| ADO  | 2005 | 239 | 18 | 46      | 16.432  | P         | 0.200   | 0.655 |       |
| CIA  | 2005 | 239 | 18 | 46      | 16.834  | P         | 0.200   | 0.289 |       |
| FMP  | 2005 | 239 | 18 | 46      | 17.573  | P         | 0.200   | 0.474 |       |
| RPV  | 2005 | 239 | 18 | 46      | 18.491  | P         | 0.200   | 0.650 |       |
| MWC  | 2005 | 239 | 18 | 46      | 18.669  | P         | 0.200   | 0.641 |       |
| PAS  | 2005 | 239 | 18 | 46      | 18.896  | P         | 0.200   | 0.700 |       |
| CHF  | 2005 | 239 | 18 | 46      | 19.001  | P         | 0.200   | 0.708 |       |
| VCS  | 2005 | 239 | 18 | 46      | 19.865  | P         | 0.200   | 0.471 |       |
| DEC  | 2005 | 239 | 18 | 46      | 20.020  | P         | 0.200   | 0.411 |       |
| EDW2 | 2005 | 239 | 18 | 46      | 20.522  | P         | 0.200   | 0.100 |       |
| DJJ  | 2005 | 239 | 18 | 46      | 20.547  | P         | 0.200   | 0.843 |       |
| SLA  | 2005 | 239 | 18 | 46      | 21.206  | P         | 0.200   | 0.309 |       |

|      |      |     |    |    |        |   |       |        |
|------|------|-----|----|----|--------|---|-------|--------|
| FUR  | 2005 | 239 | 18 | 46 | 21.525 | P | 0.200 | 0.429  |
| LRL  | 2005 | 239 | 18 | 46 | 21.652 | P | 0.200 | 0.342  |
| TOV  | 2005 | 239 | 18 | 46 | 22.703 | P | 0.200 | 0.745  |
| MPM  | 2005 | 239 | 18 | 46 | 22.875 | P | 0.200 | -0.003 |
| OSI  | 2005 | 239 | 18 | 46 | 23.657 | P | 0.200 | 0.271  |
| LGU  | 2005 | 239 | 18 | 46 | 23.718 | P | 0.200 | 0.518  |
| SCZ2 | 2005 | 239 | 18 | 46 | 25.998 | P | 0.200 | -0.071 |
| ARV  | 2005 | 239 | 18 | 46 | 26.461 | P | 0.200 | 0.439  |
| GRA  | 2005 | 239 | 18 | 46 | 26.730 | P | 0.200 | 0.406  |
| ISA  | 2005 | 239 | 18 | 46 | 26.969 | P | 0.200 | 0.492  |
| CWC  | 2005 | 239 | 18 | 46 | 28.175 | P | 0.200 | 0.436  |
| SBC  | 2005 | 239 | 18 | 46 | 28.594 | P | 0.200 | 0.361  |
| TPH  | 2005 | 239 | 18 | 46 | 30.489 | P | 0.200 | -0.127 |
| MPP  | 2005 | 239 | 18 | 46 | 31.214 | P | 0.200 | 0.386  |
| TIN  | 2005 | 239 | 18 | 46 | 31.559 | P | 0.200 | 0.417  |
| RCT  | 2005 | 239 | 18 | 46 | 32.987 | P | 0.200 | -0.276 |
| SN16 | 2005 | 239 | 18 | 46 | 33.067 | P | 0.200 | 0.330  |
| SDP  | 2005 | 239 | 18 | 46 | 33.241 | P | 0.200 | -0.064 |
| SN15 | 2005 | 239 | 18 | 46 | 34.557 | P | 0.200 | 0.244  |
| SN11 | 2005 | 239 | 18 | 46 | 34.737 | P | 0.200 | -0.555 |
| SN28 | 2005 | 239 | 18 | 46 | 35.118 | P | 0.200 | 0.422  |
| SN26 | 2005 | 239 | 18 | 46 | 35.125 | P | 0.200 | 0.164  |
| V05C | 2005 | 239 | 18 | 46 | 35.312 | P | 0.200 | 0.173  |
| SN25 | 2005 | 239 | 18 | 46 | 35.320 | P | 0.200 | 0.122  |
| SN24 | 2005 | 239 | 18 | 46 | 36.237 | P | 0.200 | -0.068 |
| SN22 | 2005 | 239 | 18 | 46 | 36.379 | P | 0.200 | -0.657 |
| SN36 | 2005 | 239 | 18 | 46 | 36.703 | P | 0.200 | 0.292  |
| SN38 | 2005 | 239 | 18 | 46 | 36.730 | P | 0.200 | 0.366  |
| SN23 | 2005 | 239 | 18 | 46 | 36.737 | P | 0.200 | -0.136 |
| SN37 | 2005 | 239 | 18 | 46 | 36.772 | P | 0.200 | 0.475  |
| PHL  | 2005 | 239 | 18 | 46 | 37.275 | P | 0.200 | 0.385  |
| MLAC | 2005 | 239 | 18 | 46 | 37.508 | P | 0.200 | 0.453  |
| T06C | 2005 | 239 | 18 | 46 | 37.578 | P | 0.200 | -1.192 |
| U05C | 2005 | 239 | 18 | 46 | 37.742 | P | 0.200 | -0.492 |
| SN48 | 2005 | 239 | 18 | 46 | 38.220 | P | 0.200 | 0.292  |
| SN47 | 2005 | 239 | 18 | 46 | 38.404 | P | 0.200 | 0.409  |
| SN42 | 2005 | 239 | 18 | 46 | 38.452 | P | 0.200 | -0.781 |
| SN46 | 2005 | 239 | 18 | 46 | 38.478 | P | 0.200 | 0.259  |
| SN44 | 2005 | 239 | 18 | 46 | 38.714 | P | 0.200 | -0.161 |
| PKD  | 2005 | 239 | 18 | 46 | 38.761 | P | 0.200 | -0.218 |
| SN45 | 2005 | 239 | 18 | 46 | 38.879 | P | 0.200 | 0.199  |
| SN43 | 2005 | 239 | 18 | 46 | 39.170 | P | 0.200 | -0.417 |
| RAMR | 2005 | 239 | 18 | 46 | 39.746 | P | 0.200 | 0.114  |
| V04C | 2005 | 239 | 18 | 46 | 39.746 | P | 0.200 | 0.111  |
| SN52 | 2005 | 239 | 18 | 46 | 39.768 | P | 0.200 | -1.069 |
| SN57 | 2005 | 239 | 18 | 46 | 40.258 | P | 0.200 | 0.206  |
| SN53 | 2005 | 239 | 18 | 46 | 40.459 | P | 0.200 | -0.433 |
| SN56 | 2005 | 239 | 18 | 46 | 40.709 | P | 0.200 | 0.294  |
| SN51 | 2005 | 239 | 18 | 46 | 40.982 | P | 0.200 | -0.720 |
| U04C | 2005 | 239 | 18 | 46 | 41.673 | P | 0.200 | -0.336 |
| SN67 | 2005 | 239 | 18 | 46 | 41.759 | P | 0.200 | 0.188  |
| SN62 | 2005 | 239 | 18 | 46 | 42.166 | P | 0.200 | -0.709 |
| SN63 | 2005 | 239 | 18 | 46 | 42.248 | P | 0.200 | -0.345 |
| SN66 | 2005 | 239 | 18 | 46 | 42.454 | P | 0.200 | 0.278  |
| S05C | 2005 | 239 | 18 | 46 | 42.967 | P | 0.200 | -0.520 |
| V03C | 2005 | 239 | 18 | 46 | 43.251 | P | 0.200 | 0.081  |
| SN73 | 2005 | 239 | 18 | 46 | 43.927 | P | 0.200 | -0.587 |
| SN76 | 2005 | 239 | 18 | 46 | 43.989 | P | 0.200 | 0.141  |
| SN74 | 2005 | 239 | 18 | 46 | 44.028 | P | 0.200 | -0.265 |
| SN71 | 2005 | 239 | 18 | 46 | 44.499 | P | 0.200 | -0.612 |
| SN84 | 2005 | 239 | 18 | 46 | 45.875 | P | 0.200 | -0.307 |
| HAST | 2005 | 239 | 18 | 46 | 46.036 | P | 0.200 | -0.315 |
| SN86 | 2005 | 239 | 18 | 46 | 46.068 | P | 0.200 | 0.052  |

|      |      |     |    |    |        |   |       |        |
|------|------|-----|----|----|--------|---|-------|--------|
| CMB  | 2005 | 239 | 18 | 46 | 46.359 | P | 0.200 | -0.425 |
| SAO  | 2005 | 239 | 18 | 46 | 46.943 | P | 0.200 | -0.322 |
| PACP | 2005 | 239 | 18 | 46 | 47.159 | P | 0.200 | -0.228 |
| SN95 | 2005 | 239 | 18 | 46 | 47.380 | P | 0.200 | -0.155 |
| R05C | 2005 | 239 | 18 | 46 | 48.354 | P | 0.200 | 0.069  |
| S04C | 2005 | 239 | 18 | 46 | 49.482 | P | 0.200 | 0.034  |
| R04C | 2005 | 239 | 18 | 46 | 50.758 | P | 0.200 | 0.280  |
| MHC  | 2005 | 239 | 18 | 46 | 50.905 | P | 0.200 | 0.206  |
| LAVA | 2005 | 239 | 18 | 46 | 51.429 | P | 0.200 | -0.204 |
| BNLO | 2005 | 239 | 18 | 46 | 52.472 | P | 0.200 | -0.222 |
| WENL | 2005 | 239 | 18 | 46 | 52.585 | P | 0.200 | 0.379  |
| P05C | 2005 | 239 | 18 | 46 | 53.536 | P | 0.200 | 0.158  |
| JRSC | 2005 | 239 | 18 | 46 | 53.891 | P | 0.200 | -0.039 |
| Q04C | 2005 | 239 | 18 | 46 | 55.300 | P | 0.200 | 0.123  |
| BRIB | 2005 | 239 | 18 | 46 | 55.607 | P | 0.200 | 0.078  |
| BRK  | 2005 | 239 | 18 | 46 | 55.855 | P | 0.200 | -0.001 |
| BKS  | 2005 | 239 | 18 | 46 | 55.982 | P | 0.200 | 0.123  |
| O05C | 2005 | 239 | 18 | 46 | 57.607 | P | 0.200 | -0.040 |
| Q03C | 2005 | 239 | 18 | 46 | 58.197 | P | 0.200 | 0.553  |
| CVS  | 2005 | 239 | 18 | 46 | 58.556 | P | 0.200 | -0.300 |
| ORV  | 2005 | 239 | 18 | 46 | 58.750 | P | 0.200 | 0.062  |
| FARB | 2005 | 239 | 18 | 46 | 58.851 | P | 0.200 | -0.376 |
| O04C | 2005 | 239 | 18 | 46 | 59.520 | P | 0.200 | -0.558 |
| M06C | 2005 | 239 | 18 | 46 | 59.765 | P | 0.200 | -1.090 |
| MNRC | 2005 | 239 | 18 | 47 | 1.094  | P | 0.200 | 0.243  |
| O03C | 2005 | 239 | 18 | 47 | 2.099  | P | 0.200 | -1.131 |
| HATC | 2005 | 239 | 18 | 47 | 3.120  | P | 0.200 | -0.846 |
| HOPS | 2005 | 239 | 18 | 47 | 4.641  | P | 0.200 | 0.137  |
| WDC  | 2005 | 239 | 18 | 47 | 5.515  | P | 0.200 | -2.724 |
| YBH  | 2005 | 239 | 18 | 47 | 12.123 | P | 0.200 | -1.724 |
| JCC  | 2005 | 239 | 18 | 47 | 16.188 | P | 0.200 | -0.286 |
| HUMO | 2005 | 239 | 18 | 47 | 16.308 | P | 0.200 | -2.219 |

|      |     |    |    |        |          |           |         |    |       |
|------|-----|----|----|--------|----------|-----------|---------|----|-------|
| 2005 | 280 | 17 | 43 | 3.0646 | 13.29500 | -89.34700 | 49.7000 | 26 | 0.003 |
|------|-----|----|----|--------|----------|-----------|---------|----|-------|

|      |      |     |    |    |        |   |       |        |
|------|------|-----|----|----|--------|---|-------|--------|
| HEC  | 2005 | 280 | 17 | 49 | 29.009 | P | 0.200 | 0.214  |
| TUQ  | 2005 | 280 | 17 | 49 | 29.285 | P | 0.200 | -0.251 |
| SVD  | 2005 | 280 | 17 | 49 | 29.812 | P | 0.200 | -0.042 |
| VTV  | 2005 | 280 | 17 | 49 | 32.915 | P | 0.200 | -0.591 |
| RRX  | 2005 | 280 | 17 | 49 | 33.094 | P | 0.200 | 0.139  |
| BFS  | 2005 | 280 | 17 | 49 | 33.737 | P | 0.200 | -0.322 |
| SHO  | 2005 | 280 | 17 | 49 | 33.828 | P | 0.200 | 0.069  |
| GSC  | 2005 | 280 | 17 | 49 | 34.016 | P | 0.200 | 0.049  |
| CIA  | 2005 | 280 | 17 | 49 | 34.668 | P | 0.200 | -0.177 |
| FMP  | 2005 | 280 | 17 | 49 | 35.394 | P | 0.200 | -0.020 |
| RPV  | 2005 | 280 | 17 | 49 | 35.866 | P | 0.200 | -0.365 |
| MWC  | 2005 | 280 | 17 | 49 | 35.953 | P | 0.200 | -0.468 |
| PAS  | 2005 | 280 | 17 | 49 | 36.100 | P | 0.200 | -0.516 |
| CHF  | 2005 | 280 | 17 | 49 | 36.259 | P | 0.200 | -0.460 |
| VCS  | 2005 | 280 | 17 | 49 | 37.359 | P | 0.200 | -0.518 |
| DJJ  | 2005 | 280 | 17 | 49 | 37.851 | P | 0.200 | -0.353 |
| DEC  | 2005 | 280 | 17 | 49 | 38.123 | P | 0.200 | -0.002 |
| EDW2 | 2005 | 280 | 17 | 49 | 38.510 | P | 0.200 | -0.501 |
| SLA  | 2005 | 280 | 17 | 49 | 39.156 | P | 0.200 | -0.501 |
| LRL  | 2005 | 280 | 17 | 49 | 40.061 | P | 0.200 | 0.039  |
| FUR  | 2005 | 280 | 17 | 49 | 40.262 | P | 0.200 | 0.273  |
| TOV  | 2005 | 280 | 17 | 49 | 40.322 | P | 0.200 | -0.315 |
| MPM  | 2005 | 280 | 17 | 49 | 41.466 | P | 0.200 | -0.303 |
| LGU  | 2005 | 280 | 17 | 49 | 42.024 | P | 0.200 | 0.054  |
| SCZ2 | 2005 | 280 | 17 | 49 | 44.815 | P | 0.200 | -0.237 |
| ARV  | 2005 | 280 | 17 | 49 | 45.105 | P | 0.200 | 0.075  |
| ISA  | 2005 | 280 | 17 | 49 | 45.682 | P | 0.200 | 0.144  |
| GRA  | 2005 | 280 | 17 | 49 | 46.125 | P | 0.200 | 0.508  |
| CWC  | 2005 | 280 | 17 | 49 | 47.181 | P | 0.200 | 0.190  |

|      |      |     |    |    |        |   |       |        |
|------|------|-----|----|----|--------|---|-------|--------|
| SBC  | 2005 | 280 | 17 | 49 | 47.273 | P | 0.200 | -0.099 |
| VES  | 2005 | 280 | 17 | 49 | 50.103 | P | 0.200 | 0.339  |
| MPP  | 2005 | 280 | 17 | 49 | 50.122 | P | 0.200 | -0.023 |
| TPH  | 2005 | 280 | 17 | 49 | 50.659 | P | 0.200 | 0.224  |
| TIN  | 2005 | 280 | 17 | 49 | 51.298 | P | 0.200 | 0.562  |
| SDP  | 2005 | 280 | 17 | 49 | 52.746 | P | 0.200 | -0.079 |
| SN16 | 2005 | 280 | 17 | 49 | 52.807 | P | 0.200 | 0.330  |
| RCT  | 2005 | 280 | 17 | 49 | 52.941 | P | 0.200 | 0.079  |
| SMM  | 2005 | 280 | 17 | 49 | 53.191 | P | 0.200 | 0.226  |
| S08C | 2005 | 280 | 17 | 49 | 53.382 | P | 0.200 | 0.456  |
| HELL | 2005 | 280 | 17 | 49 | 53.832 | P | 0.200 | 0.362  |
| SN14 | 2005 | 280 | 17 | 49 | 54.227 | P | 0.200 | -0.330 |
| SN15 | 2005 | 280 | 17 | 49 | 54.371 | P | 0.200 | 0.238  |
| SN26 | 2005 | 280 | 17 | 49 | 55.196 | P | 0.200 | 0.312  |
| SN28 | 2005 | 280 | 17 | 49 | 55.403 | P | 0.200 | 0.726  |
| SN25 | 2005 | 280 | 17 | 49 | 55.407 | P | 0.200 | 0.314  |
| PHL  | 2005 | 280 | 17 | 49 | 56.257 | P | 0.200 | -0.410 |
| SN22 | 2005 | 280 | 17 | 49 | 56.626 | P | 0.200 | -0.362 |
| SN36 | 2005 | 280 | 17 | 49 | 56.679 | P | 0.200 | 0.244  |
| SN23 | 2005 | 280 | 17 | 49 | 56.934 | P | 0.200 | 0.115  |
| MLAC | 2005 | 280 | 17 | 49 | 57.117 | P | 0.200 | -0.009 |
| SN37 | 2005 | 280 | 17 | 49 | 57.133 | P | 0.200 | 0.764  |
| SN38 | 2005 | 280 | 17 | 49 | 57.202 | P | 0.200 | 0.700  |
| SN34 | 2005 | 280 | 17 | 49 | 57.516 | P | 0.200 | 0.241  |
| T06C | 2005 | 280 | 17 | 49 | 57.746 | P | 0.200 | -1.102 |
| U05C | 2005 | 280 | 17 | 49 | 57.787 | P | 0.200 | -0.398 |
| MNV  | 2005 | 280 | 17 | 49 | 57.958 | P | 0.200 | 0.659  |
| PKD  | 2005 | 280 | 17 | 49 | 58.675 | P | 0.200 | -0.262 |
| SN48 | 2005 | 280 | 17 | 49 | 58.815 | P | 0.200 | 0.639  |
| SN47 | 2005 | 280 | 17 | 49 | 58.853 | P | 0.200 | 0.644  |
| SN44 | 2005 | 280 | 17 | 49 | 59.006 | P | 0.200 | -0.010 |
| SN45 | 2005 | 280 | 17 | 49 | 59.243 | P | 0.200 | 0.417  |
| SN43 | 2005 | 280 | 17 | 49 | 59.541 | P | 0.200 | -0.225 |
| SN52 | 2005 | 280 | 17 | 50 | 0.021  | P | 0.200 | -1.077 |
| SN53 | 2005 | 280 | 17 | 50 | 0.590  | P | 0.200 | -0.603 |
| SN57 | 2005 | 280 | 17 | 50 | 1.063  | P | 0.200 | 0.665  |
| SN51 | 2005 | 280 | 17 | 50 | 1.131  | P | 0.200 | -0.877 |
| R07C | 2005 | 280 | 17 | 50 | 1.134  | P | 0.200 | 0.647  |
| SN56 | 2005 | 280 | 17 | 50 | 1.293  | P | 0.200 | 0.540  |
| SN55 | 2005 | 280 | 17 | 50 | 1.335  | P | 0.200 | 0.111  |
| SN54 | 2005 | 280 | 17 | 50 | 1.442  | P | 0.200 | 0.042  |
| U04C | 2005 | 280 | 17 | 50 | 1.836  | P | 0.200 | -0.406 |
| SN67 | 2005 | 280 | 17 | 50 | 2.540  | P | 0.200 | 0.477  |
| SN62 | 2005 | 280 | 17 | 50 | 2.545  | P | 0.200 | -0.785 |
| SN65 | 2005 | 280 | 17 | 50 | 2.655  | P | 0.200 | -0.192 |
| SN64 | 2005 | 280 | 17 | 50 | 2.810  | P | 0.200 | -0.037 |
| S05C | 2005 | 280 | 17 | 50 | 3.305  | P | 0.200 | -0.633 |
| T05C | 2005 | 280 | 17 | 50 | 3.323  | P | 0.200 | -0.568 |
| BMN  | 2005 | 280 | 17 | 50 | 3.340  | P | 0.200 | 0.390  |
| SN66 | 2005 | 280 | 17 | 50 | 3.344  | P | 0.200 | 0.660  |
| V03C | 2005 | 280 | 17 | 50 | 3.427  | P | 0.200 | -0.034 |
| SN75 | 2005 | 280 | 17 | 50 | 4.348  | P | 0.200 | -0.103 |
| SN73 | 2005 | 280 | 17 | 50 | 4.751  | P | 0.200 | -0.348 |
| SN74 | 2005 | 280 | 17 | 50 | 5.016  | P | 0.200 | 0.119  |
| SN76 | 2005 | 280 | 17 | 50 | 5.025  | P | 0.200 | 0.524  |
| SN71 | 2005 | 280 | 17 | 50 | 5.194  | P | 0.200 | -0.524 |
| R06C | 2005 | 280 | 17 | 50 | 5.469  | P | 0.200 | 0.612  |
| SCZ  | 2005 | 280 | 17 | 50 | 5.701  | P | 0.200 | -1.188 |
| SN85 | 2005 | 280 | 17 | 50 | 6.816  | P | 0.200 | 0.285  |
| SN84 | 2005 | 280 | 17 | 50 | 6.917  | P | 0.200 | -0.019 |
| CMB  | 2005 | 280 | 17 | 50 | 7.126  | P | 0.200 | -0.418 |
| SAO  | 2005 | 280 | 17 | 50 | 7.172  | P | 0.200 | -0.720 |
| SN86 | 2005 | 280 | 17 | 50 | 7.362  | P | 0.200 | 0.542  |

|      |      |     |    |    |        |   |       |        |
|------|------|-----|----|----|--------|---|-------|--------|
| PACP | 2005 | 280 | 17 | 50 | 7.519  | P | 0.200 | -0.534 |
| SN95 | 2005 | 280 | 17 | 50 | 8.442  | P | 0.200 | 0.063  |
| R05C | 2005 | 280 | 17 | 50 | 9.839  | P | 0.200 | 0.581  |
| S04C | 2005 | 280 | 17 | 50 | 10.057 | P | 0.200 | -0.268 |
| MHC  | 2005 | 280 | 17 | 50 | 11.585 | P | 0.200 | -0.041 |
| R04C | 2005 | 280 | 17 | 50 | 12.169 | P | 0.200 | 0.620  |
| LAVA | 2005 | 280 | 17 | 50 | 13.008 | P | 0.200 | 0.143  |
| WENL | 2005 | 280 | 17 | 50 | 13.973 | P | 0.200 | 0.662  |
| P05C | 2005 | 280 | 17 | 50 | 15.345 | P | 0.200 | 0.493  |
| BDM  | 2005 | 280 | 17 | 50 | 16.105 | P | 0.200 | 0.659  |
| Q04C | 2005 | 280 | 17 | 50 | 17.236 | P | 0.200 | 0.566  |
| BRK  | 2005 | 280 | 17 | 50 | 17.391 | P | 0.200 | 0.135  |
| O05C | 2005 | 280 | 17 | 50 | 20.157 | P | 0.200 | 0.605  |
| CVS  | 2005 | 280 | 17 | 50 | 20.314 | P | 0.200 | -0.200 |
| Q03C | 2005 | 280 | 17 | 50 | 20.315 | P | 0.200 | 1.056  |
| ORV  | 2005 | 280 | 17 | 50 | 21.076 | P | 0.200 | 0.498  |
| ELFS | 2005 | 280 | 17 | 50 | 22.256 | P | 0.200 | 0.426  |
| O04C | 2005 | 280 | 17 | 50 | 22.463 | P | 0.200 | 0.237  |
| M06C | 2005 | 280 | 17 | 50 | 23.134 | P | 0.200 | -0.189 |
| HATC | 2005 | 280 | 17 | 50 | 26.445 | P | 0.200 | -0.042 |
| M05C | 2005 | 280 | 17 | 50 | 27.123 | P | 0.200 | -0.386 |
| WDC  | 2005 | 280 | 17 | 50 | 28.201 | P | 0.200 | -2.757 |
| M04C | 2005 | 280 | 17 | 50 | 32.625 | P | 0.200 | -0.449 |
| JCC  | 2005 | 280 | 17 | 50 | 39.793 | P | 0.200 | -0.054 |

|      |      |   |    |         |         |           |        |        |       |
|------|------|---|----|---------|---------|-----------|--------|--------|-------|
| 2006 | 6    | 3 | 39 | 59.7562 | 6.63500 | -82.33700 | 7.4000 | 102    | 0.007 |
| HEC  | 2006 | 6 | 3  | 47      | 52.609  | P         | 0.200  | 0.779  |       |
| TUQ  | 2006 | 6 | 3  | 47      | 52.706  | P         | 0.200  | 0.275  |       |
| BBR  | 2006 | 6 | 3  | 47      | 53.639  | P         | 0.200  | 0.899  |       |
| RRX  | 2006 | 6 | 3  | 47      | 56.445  | P         | 0.200  | 0.711  |       |
| SHO  | 2006 | 6 | 3  | 47      | 56.778  | P         | 0.200  | 0.456  |       |
| GSC  | 2006 | 6 | 3  | 47      | 57.110  | P         | 0.200  | 0.471  |       |
| BFS  | 2006 | 6 | 3  | 47      | 57.171  | P         | 0.200  | 0.362  |       |
| FMP  | 2006 | 6 | 3  | 47      | 58.530  | P         | 0.200  | 0.445  |       |
| DEC  | 2006 | 6 | 3  | 48      | 1.079   | P         | 0.200  | 0.483  |       |
| EDW2 | 2006 | 6 | 3  | 48      | 1.488   | P         | 0.200  | 0.074  |       |
| FUR  | 2006 | 6 | 3  | 48      | 2.660   | P         | 0.200  | 0.554  |       |
| LRL  | 2006 | 6 | 3  | 48      | 2.775   | P         | 0.200  | 0.467  |       |
| MPM  | 2006 | 6 | 3  | 48      | 3.952   | P         | 0.200  | 0.071  |       |
| OSI  | 2006 | 6 | 3  | 48      | 4.511   | P         | 0.200  | 0.146  |       |
| LGU  | 2006 | 6 | 3  | 48      | 4.815   | P         | 0.200  | 0.644  |       |
| SCZ2 | 2006 | 6 | 3  | 48      | 6.986   | P         | 0.200  | -0.046 |       |
| ARV  | 2006 | 6 | 3  | 48      | 7.466   | P         | 0.200  | 0.465  |       |
| ISA  | 2006 | 6 | 3  | 48      | 7.880   | P         | 0.200  | 0.416  |       |
| GRA  | 2006 | 6 | 3  | 48      | 8.009   | P         | 0.200  | 0.681  |       |
| CWC  | 2006 | 6 | 3  | 48      | 9.094   | P         | 0.200  | 0.361  |       |
| SBC  | 2006 | 6 | 3  | 48      | 9.534   | P         | 0.200  | 0.338  |       |
| TPH  | 2006 | 6 | 3  | 48      | 11.720  | P         | 0.200  | 0.100  |       |
| VES  | 2006 | 6 | 3  | 48      | 11.898  | P         | 0.200  | 0.512  |       |
| MPP  | 2006 | 6 | 3  | 48      | 12.055  | P         | 0.200  | 0.265  |       |
| TIN  | 2006 | 6 | 3  | 48      | 12.877  | P         | 0.200  | 0.744  |       |
| RCT  | 2006 | 6 | 3  | 48      | 14.140  | P         | 0.200  | -0.103 |       |
| SDP  | 2006 | 6 | 3  | 48      | 14.270  | P         | 0.200  | 0.008  |       |
| S08C | 2006 | 6 | 3  | 48      | 14.614  | P         | 0.200  | 0.486  |       |
| SMM  | 2006 | 6 | 3  | 48      | 14.907  | P         | 0.200  | 0.508  |       |
| HELL | 2006 | 6 | 3  | 48      | 15.155  | P         | 0.200  | 0.395  |       |
| SN15 | 2006 | 6 | 3  | 48      | 15.670  | P         | 0.200  | 0.364  |       |
| SN26 | 2006 | 6 | 3  | 48      | 16.240  | P         | 0.200  | 0.283  |       |
| SN28 | 2006 | 6 | 3  | 48      | 16.288  | P         | 0.200  | 0.592  |       |
| V05C | 2006 | 6 | 3  | 48      | 16.605  | P         | 0.200  | 0.493  |       |
| SN21 | 2006 | 6 | 3  | 48      | 16.735  | P         | 0.200  | -1.109 |       |
| SN22 | 2006 | 6 | 3  | 48      | 17.532  | P         | 0.200  | -0.483 |       |
| SN36 | 2006 | 6 | 3  | 48      | 17.616  | P         | 0.200  | 0.210  |       |

|      |      |   |   |    |        |   |       |        |
|------|------|---|---|----|--------|---|-------|--------|
| SN37 | 2006 | 6 | 3 | 48 | 17.837 | P | 0.200 | 0.545  |
| SN23 | 2006 | 6 | 3 | 48 | 17.842 | P | 0.200 | -0.015 |
| SN38 | 2006 | 6 | 3 | 48 | 17.896 | P | 0.200 | 0.535  |
| SN34 | 2006 | 6 | 3 | 48 | 18.355 | P | 0.200 | 0.128  |
| T06C | 2006 | 6 | 3 | 48 | 18.526 | P | 0.200 | -1.219 |
| U05C | 2006 | 6 | 3 | 48 | 18.883 | P | 0.200 | -0.317 |
| SN48 | 2006 | 6 | 3 | 48 | 19.284 | P | 0.200 | 0.363  |
| SN47 | 2006 | 6 | 3 | 48 | 19.415 | P | 0.200 | 0.429  |
| PKD  | 2006 | 6 | 3 | 48 | 19.695 | P | 0.200 | -0.243 |
| SN45 | 2006 | 6 | 3 | 48 | 19.886 | P | 0.200 | 0.221  |
| SN43 | 2006 | 6 | 3 | 48 | 20.172 | P | 0.200 | -0.392 |
| V04C | 2006 | 6 | 3 | 48 | 20.724 | P | 0.200 | 0.136  |
| SN52 | 2006 | 6 | 3 | 48 | 20.765 | P | 0.200 | -1.045 |
| SN57 | 2006 | 6 | 3 | 48 | 21.367 | P | 0.200 | 0.331  |
| SN53 | 2006 | 6 | 3 | 48 | 21.408 | P | 0.200 | -0.460 |
| R07C | 2006 | 6 | 3 | 48 | 21.539 | P | 0.200 | 0.430  |
| SN51 | 2006 | 6 | 3 | 48 | 21.876 | P | 0.200 | -0.798 |
| SN55 | 2006 | 6 | 3 | 48 | 21.899 | P | 0.200 | 0.028  |
| SN54 | 2006 | 6 | 3 | 48 | 21.913 | P | 0.200 | -0.117 |
| U04C | 2006 | 6 | 3 | 48 | 22.654 | P | 0.200 | -0.313 |
| SN62 | 2006 | 6 | 3 | 48 | 23.061 | P | 0.200 | -0.788 |
| S05C | 2006 | 6 | 3 | 48 | 24.008 | P | 0.200 | -0.447 |
| V03C | 2006 | 6 | 3 | 48 | 24.175 | P | 0.200 | 0.053  |
| S06C | 2006 | 6 | 3 | 48 | 24.197 | P | 0.200 | -0.187 |
| T05C | 2006 | 6 | 3 | 48 | 24.230 | P | 0.200 | -0.225 |
| SN73 | 2006 | 6 | 3 | 48 | 24.970 | P | 0.200 | -0.518 |
| SN76 | 2006 | 6 | 3 | 48 | 24.991 | P | 0.200 | 0.163  |
| R06C | 2006 | 6 | 3 | 48 | 25.424 | P | 0.200 | 0.295  |
| SN71 | 2006 | 6 | 3 | 48 | 25.489 | P | 0.200 | -0.594 |
| SN84 | 2006 | 6 | 3 | 48 | 26.869 | P | 0.200 | -0.289 |
| SN85 | 2006 | 6 | 3 | 48 | 26.873 | P | 0.200 | 0.112  |
| HAST | 2006 | 6 | 3 | 48 | 26.907 | P | 0.200 | -0.399 |
| CMB  | 2006 | 6 | 3 | 48 | 27.250 | P | 0.200 | -0.507 |
| SAO  | 2006 | 6 | 3 | 48 | 27.725 | P | 0.200 | -0.493 |
| PACP | 2006 | 6 | 3 | 48 | 28.086 | P | 0.200 | -0.259 |
| R05C | 2006 | 6 | 3 | 48 | 29.549 | P | 0.200 | 0.285  |
| S04C | 2006 | 6 | 3 | 48 | 30.309 | P | 0.200 | -0.087 |
| MHC  | 2006 | 6 | 3 | 48 | 31.777 | P | 0.200 | 0.135  |
| R04C | 2006 | 6 | 3 | 48 | 31.842 | P | 0.200 | 0.410  |
| LAVA | 2006 | 6 | 3 | 48 | 32.465 | P | 0.200 | -0.125 |
| BNLO | 2006 | 6 | 3 | 48 | 33.487 | P | 0.200 | -0.149 |
| WENL | 2006 | 6 | 3 | 48 | 33.707 | P | 0.200 | 0.551  |
| P05C | 2006 | 6 | 3 | 48 | 34.474 | P | 0.200 | 0.128  |
| JRSC | 2006 | 6 | 3 | 48 | 34.906 | P | 0.200 | 0.032  |
| BDM  | 2006 | 6 | 3 | 48 | 35.658 | P | 0.200 | 0.536  |
| BRIB | 2006 | 6 | 3 | 48 | 36.774 | P | 0.200 | 0.299  |
| BRK  | 2006 | 6 | 3 | 48 | 36.871 | P | 0.200 | 0.073  |
| BKS  | 2006 | 6 | 3 | 48 | 36.948 | P | 0.200 | 0.147  |
| O05C | 2006 | 6 | 3 | 48 | 38.841 | P | 0.200 | 0.237  |
| Q03C | 2006 | 6 | 3 | 48 | 39.267 | P | 0.200 | 0.677  |
| CVS  | 2006 | 6 | 3 | 48 | 39.470 | P | 0.200 | -0.325 |
| FARB | 2006 | 6 | 3 | 48 | 39.857 | P | 0.200 | -0.301 |
| ORV  | 2006 | 6 | 3 | 48 | 39.877 | P | 0.200 | 0.237  |
| O04C | 2006 | 6 | 3 | 48 | 40.752 | P | 0.200 | -0.283 |
| M06C | 2006 | 6 | 3 | 48 | 41.202 | P | 0.200 | -0.616 |
| MNRC | 2006 | 6 | 3 | 48 | 42.009 | P | 0.200 | 0.217  |
| HATC | 2006 | 6 | 3 | 48 | 44.546 | P | 0.200 | -0.375 |
| M05C | 2006 | 6 | 3 | 48 | 45.061 | P | 0.200 | -0.664 |
| HOPS | 2006 | 6 | 3 | 48 | 45.648 | P | 0.200 | 0.207  |
| WDC  | 2006 | 6 | 3 | 48 | 46.379 | P | 0.200 | -2.798 |
| GASB | 2006 | 6 | 3 | 48 | 46.753 | P | 0.200 | 0.339  |
| O02C | 2006 | 6 | 3 | 48 | 46.863 | P | 0.200 | -1.944 |
| M03C | 2006 | 6 | 3 | 48 | 48.718 | P | 0.200 | -1.330 |

|      |      |   |   |    |        |   |       |        |
|------|------|---|---|----|--------|---|-------|--------|
| P01C | 2006 | 6 | 3 | 48 | 49.062 | P | 0.200 | 0.269  |
| M04C | 2006 | 6 | 3 | 48 | 50.168 | P | 0.200 | -0.684 |
| N02C | 2006 | 6 | 3 | 48 | 53.105 | P | 0.200 | -0.853 |
| O01C | 2006 | 6 | 3 | 48 | 54.055 | P | 0.200 | 0.264  |
| DBO  | 2006 | 6 | 3 | 49 | 1.909  | P | 0.200 | -0.967 |

|      |     |    |    |         |          |           |          |    |       |
|------|-----|----|----|---------|----------|-----------|----------|----|-------|
| 2005 | 357 | 21 | 47 | 28.7171 | -1.38600 | -77.51700 | 192.9000 | 53 | 0.007 |
|------|-----|----|----|---------|----------|-----------|----------|----|-------|

|      |      |     |    |    |        |   |       |        |
|------|------|-----|----|----|--------|---|-------|--------|
| HEC  | 2005 | 357 | 21 | 56 | 12.658 | P | 0.200 | 0.486  |
| TUQ  | 2005 | 357 | 21 | 56 | 12.920 | P | 0.200 | 0.017  |
| BBR  | 2005 | 357 | 21 | 56 | 13.523 | P | 0.200 | 0.785  |
| RRX  | 2005 | 357 | 21 | 56 | 16.206 | P | 0.200 | 0.568  |
| BFS  | 2005 | 357 | 21 | 56 | 16.310 | P | 0.200 | -0.016 |
| CIA  | 2005 | 357 | 21 | 56 | 16.605 | P | 0.200 | 0.061  |
| SHO  | 2005 | 357 | 21 | 56 | 16.734 | P | 0.200 | 0.249  |
| GSC  | 2005 | 357 | 21 | 56 | 16.985 | P | 0.200 | 0.392  |
| FMP  | 2005 | 357 | 21 | 56 | 17.470 | P | 0.200 | 0.263  |
| DEC  | 2005 | 357 | 21 | 56 | 19.961 | P | 0.200 | 0.339  |
| EDW2 | 2005 | 357 | 21 | 56 | 20.493 | P | 0.200 | -0.123 |
| LRL  | 2005 | 357 | 21 | 56 | 21.959 | P | 0.200 | 0.327  |
| TPNV | 2005 | 357 | 21 | 56 | 22.082 | P | 0.200 | 0.879  |
| FUR  | 2005 | 357 | 21 | 56 | 22.242 | P | 0.200 | 0.460  |
| LGU  | 2005 | 357 | 21 | 56 | 22.906 | P | 0.200 | 0.188  |
| MPM  | 2005 | 357 | 21 | 56 | 23.070 | P | 0.200 | -0.208 |
| OSI  | 2005 | 357 | 21 | 56 | 23.103 | P | 0.200 | -0.016 |
| SCZ2 | 2005 | 357 | 21 | 56 | 25.039 | P | 0.200 | -0.134 |
| ARV  | 2005 | 357 | 21 | 56 | 25.892 | P | 0.200 | 0.277  |
| ISA  | 2005 | 357 | 21 | 56 | 26.529 | P | 0.200 | 0.252  |
| SBC  | 2005 | 357 | 21 | 56 | 27.165 | P | 0.200 | -0.116 |
| GRA  | 2005 | 357 | 21 | 56 | 27.175 | P | 0.200 | 0.570  |
| CWC  | 2005 | 357 | 21 | 56 | 27.927 | P | 0.200 | 0.247  |
| MPP  | 2005 | 357 | 21 | 56 | 29.845 | P | 0.200 | 0.072  |
| VES  | 2005 | 357 | 21 | 56 | 30.080 | P | 0.200 | 0.271  |
| TIN  | 2005 | 357 | 21 | 56 | 31.256 | P | 0.200 | 0.374  |
| RCT  | 2005 | 357 | 21 | 56 | 31.960 | P | 0.200 | -0.544 |
| SMM  | 2005 | 357 | 21 | 56 | 32.495 | P | 0.200 | 0.245  |
| HELL | 2005 | 357 | 21 | 56 | 33.109 | P | 0.200 | 0.030  |
| SN11 | 2005 | 357 | 21 | 56 | 33.409 | P | 0.200 | -0.977 |
| SN15 | 2005 | 357 | 21 | 56 | 34.081 | P | 0.200 | 0.266  |
| V05C | 2005 | 357 | 21 | 56 | 34.153 | P | 0.200 | 0.148  |
| SN26 | 2005 | 357 | 21 | 56 | 34.610 | P | 0.200 | 0.170  |
| SN25 | 2005 | 357 | 21 | 56 | 34.664 | P | 0.200 | 0.074  |
| SN28 | 2005 | 357 | 21 | 56 | 34.985 | P | 0.200 | 0.664  |
| SN22 | 2005 | 357 | 21 | 56 | 35.273 | P | 0.200 | -0.801 |
| SN23 | 2005 | 357 | 21 | 56 | 35.704 | P | 0.200 | -0.287 |
| SN36 | 2005 | 357 | 21 | 56 | 35.768 | P | 0.200 | 0.000  |
| SN37 | 2005 | 357 | 21 | 56 | 36.121 | P | 0.200 | 0.434  |
| U05C | 2005 | 357 | 21 | 56 | 36.189 | P | 0.200 | -0.655 |
| SN38 | 2005 | 357 | 21 | 56 | 36.293 | P | 0.200 | 0.486  |
| T06C | 2005 | 357 | 21 | 56 | 36.300 | P | 0.200 | -1.270 |
| SN34 | 2005 | 357 | 21 | 56 | 36.412 | P | 0.200 | 0.024  |
| MNV  | 2005 | 357 | 21 | 56 | 36.883 | P | 0.200 | 0.377  |
| PKD  | 2005 | 357 | 21 | 56 | 36.920 | P | 0.200 | -0.477 |
| SN47 | 2005 | 357 | 21 | 56 | 37.606 | P | 0.200 | 0.379  |
| SN44 | 2005 | 357 | 21 | 56 | 37.624 | P | 0.200 | -0.251 |
| SN48 | 2005 | 357 | 21 | 56 | 37.634 | P | 0.200 | 0.403  |
| SN43 | 2005 | 357 | 21 | 56 | 37.718 | P | 0.200 | -0.747 |
| SN45 | 2005 | 357 | 21 | 56 | 37.826 | P | 0.200 | 0.034  |
| RAMR | 2005 | 357 | 21 | 56 | 37.859 | P | 0.200 | 0.007  |
| V04C | 2005 | 357 | 21 | 56 | 37.860 | P | 0.200 | 0.004  |
| SN52 | 2005 | 357 | 21 | 56 | 38.420 | P | 0.200 | -1.100 |
| SN53 | 2005 | 357 | 21 | 56 | 38.820 | P | 0.200 | -0.813 |
| SN46 | 2005 | 357 | 21 | 56 | 39.116 | P | 0.200 | 1.724  |
| SN57 | 2005 | 357 | 21 | 56 | 39.482 | P | 0.200 | 0.375  |



|      |      |     |    |    |        |   |       |        |
|------|------|-----|----|----|--------|---|-------|--------|
| SN51 | 2005 | 357 | 21 | 56 | 39.495 | P | 0.200 | -0.774 |
| R07C | 2005 | 357 | 21 | 56 | 39.568 | P | 0.200 | 0.428  |
| SN55 | 2005 | 357 | 21 | 56 | 39.800 | P | 0.200 | 0.016  |
| U04C | 2005 | 357 | 21 | 56 | 39.832 | P | 0.200 | -0.353 |
| SN62 | 2005 | 357 | 21 | 56 | 40.558 | P | 0.200 | -0.840 |
| V03C | 2005 | 357 | 21 | 56 | 41.341 | P | 0.200 | 0.255  |
| T05C | 2005 | 357 | 21 | 56 | 41.415 | P | 0.200 | -0.284 |
| S05C | 2005 | 357 | 21 | 56 | 41.594 | P | 0.200 | -0.258 |
| S06C | 2005 | 357 | 21 | 56 | 41.787 | P | 0.200 | -0.205 |
| SN73 | 2005 | 357 | 21 | 56 | 42.462 | P | 0.200 | -0.480 |
| SN74 | 2005 | 357 | 21 | 56 | 42.694 | P | 0.200 | -0.123 |
| SN76 | 2005 | 357 | 21 | 56 | 42.736 | P | 0.200 | 0.196  |
| SN71 | 2005 | 357 | 21 | 56 | 42.933 | P | 0.200 | -0.473 |
| R06C | 2005 | 357 | 21 | 56 | 43.222 | P | 0.200 | 0.376  |
| HAST | 2005 | 357 | 21 | 56 | 43.787 | P | 0.200 | -0.266 |
| SN85 | 2005 | 357 | 21 | 56 | 44.122 | P | 0.200 | -0.100 |
| SN86 | 2005 | 357 | 21 | 56 | 44.860 | P | 0.200 | 0.356  |
| PACP | 2005 | 357 | 21 | 56 | 45.169 | P | 0.200 | -0.008 |
| SN95 | 2005 | 357 | 21 | 56 | 45.634 | P | 0.200 | -0.167 |
| R05C | 2005 | 357 | 21 | 56 | 46.941 | P | 0.200 | 0.356  |
| S04C | 2005 | 357 | 21 | 56 | 47.153 | P | 0.200 | 0.011  |
| MHC  | 2005 | 357 | 21 | 56 | 48.397 | P | 0.200 | 0.170  |
| R04C | 2005 | 357 | 21 | 56 | 48.808 | P | 0.200 | 0.517  |
| LAVA | 2005 | 357 | 21 | 56 | 49.306 | P | 0.200 | -0.199 |
| BNLO | 2005 | 357 | 21 | 56 | 49.647 | P | 0.200 | -0.289 |
| WENL | 2005 | 357 | 21 | 56 | 50.269 | P | 0.200 | 0.655  |
| JRSC | 2005 | 357 | 21 | 56 | 51.044 | P | 0.200 | -0.019 |
| P05C | 2005 | 357 | 21 | 56 | 51.578 | P | 0.200 | 0.380  |
| BDM  | 2005 | 357 | 21 | 56 | 52.057 | P | 0.200 | 0.566  |
| BKS  | 2005 | 357 | 21 | 56 | 52.879 | P | 0.200 | -0.063 |
| BRK  | 2005 | 357 | 21 | 56 | 52.937 | P | 0.200 | 0.023  |
| BRIB | 2005 | 357 | 21 | 56 | 52.952 | P | 0.200 | 0.278  |
| Q04C | 2005 | 357 | 21 | 56 | 53.026 | P | 0.200 | 0.370  |
| FARB | 2005 | 357 | 21 | 56 | 55.384 | P | 0.200 | -0.471 |
| CVS  | 2005 | 357 | 21 | 56 | 55.400 | P | 0.200 | -0.334 |
| Q03C | 2005 | 357 | 21 | 56 | 55.470 | P | 0.200 | 0.700  |
| O05C | 2005 | 357 | 21 | 56 | 55.517 | P | 0.200 | 0.388  |
| SUTB | 2005 | 357 | 21 | 56 | 55.756 | P | 0.200 | -0.275 |
| ORV  | 2005 | 357 | 21 | 56 | 56.361 | P | 0.200 | 0.440  |
| ELFS | 2005 | 357 | 21 | 56 | 57.209 | P | 0.200 | 0.108  |
| O04C | 2005 | 357 | 21 | 56 | 57.348 | P | 0.200 | -0.038 |
| MNRC | 2005 | 357 | 21 | 56 | 57.815 | P | 0.200 | 0.157  |
| M06C | 2005 | 357 | 21 | 56 | 58.045 | P | 0.200 | -0.219 |
| O03C | 2005 | 357 | 21 | 56 | 58.955 | P | 0.200 | -1.133 |
| HATC | 2005 | 357 | 21 | 57 | 0.712  | P | 0.200 | -0.250 |
| HOPS | 2005 | 357 | 21 | 57 | 1.060  | P | 0.200 | 0.152  |
| M05C | 2005 | 357 | 21 | 57 | 1.554  | P | 0.200 | -0.220 |
| GASB | 2005 | 357 | 21 | 57 | 2.362  | P | 0.200 | 0.381  |
| P01C | 2005 | 357 | 21 | 57 | 4.340  | P | 0.200 | 0.296  |
| M03C | 2005 | 357 | 21 | 57 | 4.556  | P | 0.200 | -1.048 |
| M04C | 2005 | 357 | 21 | 57 | 5.974  | P | 0.200 | -0.466 |
| M02C | 2005 | 357 | 21 | 57 | 7.830  | P | 0.200 | -1.400 |
| YBH  | 2005 | 357 | 21 | 57 | 8.187  | P | 0.200 | -1.710 |
| N02C | 2005 | 357 | 21 | 57 | 8.394  | P | 0.200 | -0.600 |
| JCC  | 2005 | 357 | 21 | 57 | 13.517 | P | 0.200 | 1.525  |
| I03A | 2005 | 357 | 21 | 57 | 20.287 | P | 0.200 | -0.423 |

|      |      |     |    |        |         |           |         |       |       |
|------|------|-----|----|--------|---------|-----------|---------|-------|-------|
| 2006 | 121  | 7   | 48 | 1.4482 | 8.16500 | -82.88200 | 13.0000 | 124   | 0.001 |
| TUQ  | 2006 | 121 | 7  | 55     | 41.169  | P         | 0.200   | 0.094 |       |
| HEC  | 2006 | 121 | 7  | 55     | 41.213  | P         | 0.200   | 0.656 |       |
| BBR  | 2006 | 121 | 7  | 55     | 42.411  | P         | 0.200   | 0.825 |       |
| SVD  | 2006 | 121 | 7  | 55     | 42.966  | P         | 0.200   | 1.207 |       |
| SHO  | 2006 | 121 | 7  | 55     | 45.310  | P         | 0.200   | 0.322 |       |

|      |      |     |   |    |        |   |       |        |
|------|------|-----|---|----|--------|---|-------|--------|
| BFS  | 2006 | 121 | 7 | 55 | 45.693 | P | 0.200 | -0.068 |
| GSC  | 2006 | 121 | 7 | 55 | 45.845 | P | 0.200 | 0.440  |
| CIA  | 2006 | 121 | 7 | 55 | 46.981 | P | 0.200 | 0.329  |
| MWC  | 2006 | 121 | 7 | 55 | 48.859 | P | 0.200 | 0.832  |
| CHF  | 2006 | 121 | 7 | 55 | 48.879 | P | 0.200 | 0.600  |
| PAS  | 2006 | 121 | 7 | 55 | 49.005 | P | 0.200 | 0.795  |
| DEC  | 2006 | 121 | 7 | 55 | 50.141 | P | 0.200 | 0.511  |
| VCS  | 2006 | 121 | 7 | 55 | 50.193 | P | 0.200 | 0.825  |
| DJJ  | 2006 | 121 | 7 | 55 | 50.343 | P | 0.200 | 0.594  |
| EDW2 | 2006 | 121 | 7 | 55 | 50.408 | P | 0.200 | 0.050  |
| TPNV | 2006 | 121 | 7 | 55 | 50.863 | P | 0.200 | 0.991  |
| SLA  | 2006 | 121 | 7 | 55 | 51.297 | P | 0.200 | 0.603  |
| FUR  | 2006 | 121 | 7 | 55 | 51.338 | P | 0.200 | 0.528  |
| LRL  | 2006 | 121 | 7 | 55 | 51.513 | P | 0.200 | 0.343  |
| MPM  | 2006 | 121 | 7 | 55 | 52.631 | P | 0.200 | -0.048 |
| TOV  | 2006 | 121 | 7 | 55 | 53.089 | P | 0.200 | 1.046  |
| OSI  | 2006 | 121 | 7 | 55 | 53.497 | P | 0.200 | 0.074  |
| LGU  | 2006 | 121 | 7 | 55 | 54.037 | P | 0.200 | 0.720  |
| SCZ2 | 2006 | 121 | 7 | 55 | 56.443 | P | 0.200 | 0.173  |
| ARV  | 2006 | 121 | 7 | 55 | 56.528 | P | 0.200 | 0.485  |
| GRA  | 2006 | 121 | 7 | 55 | 56.675 | P | 0.200 | 0.605  |
| ISA  | 2006 | 121 | 7 | 55 | 56.810 | P | 0.200 | 0.391  |
| CWC  | 2006 | 121 | 7 | 55 | 57.927 | P | 0.200 | 0.331  |
| S09A | 2006 | 121 | 7 | 55 | 58.609 | P | 0.200 | -0.074 |
| BAK  | 2006 | 121 | 7 | 55 | 59.394 | P | 0.200 | 0.839  |
| TPH  | 2006 | 121 | 7 | 56 | 0.275  | P | 0.200 | -0.043 |
| MPP  | 2006 | 121 | 7 | 56 | 1.213  | P | 0.200 | 0.225  |
| TIN  | 2006 | 121 | 7 | 56 | 1.748  | P | 0.200 | 0.752  |
| SN16 | 2006 | 121 | 7 | 56 | 2.945  | P | 0.200 | 0.362  |
| RCT  | 2006 | 121 | 7 | 56 | 3.279  | P | 0.200 | 0.005  |
| S08C | 2006 | 121 | 7 | 56 | 3.507  | P | 0.200 | 0.542  |
| Q09A | 2006 | 121 | 7 | 56 | 3.970  | P | 0.200 | 0.289  |
| SMM  | 2006 | 121 | 7 | 56 | 4.008  | P | 0.200 | 0.420  |
| HELL | 2006 | 121 | 7 | 56 | 4.145  | P | 0.200 | 0.404  |
| SN15 | 2006 | 121 | 7 | 56 | 4.526  | P | 0.200 | 0.327  |
| SN11 | 2006 | 121 | 7 | 56 | 4.764  | P | 0.200 | -0.523 |
| SN28 | 2006 | 121 | 7 | 56 | 5.112  | P | 0.200 | 0.609  |
| SN26 | 2006 | 121 | 7 | 56 | 5.218  | P | 0.200 | 0.399  |
| SN25 | 2006 | 121 | 7 | 56 | 5.297  | P | 0.200 | 0.203  |
| V05C | 2006 | 121 | 7 | 56 | 5.805  | P | 0.200 | 0.558  |
| SN21 | 2006 | 121 | 7 | 56 | 5.828  | P | 0.200 | -1.044 |
| R08A | 2006 | 121 | 7 | 56 | 6.540  | P | 0.200 | 0.329  |
| SN22 | 2006 | 121 | 7 | 56 | 6.646  | P | 0.200 | -0.364 |
| SN38 | 2006 | 121 | 7 | 56 | 6.738  | P | 0.200 | 0.548  |
| SN37 | 2006 | 121 | 7 | 56 | 6.862  | P | 0.200 | 0.709  |
| SN23 | 2006 | 121 | 7 | 56 | 6.931  | P | 0.200 | 0.104  |
| Q08A | 2006 | 121 | 7 | 56 | 7.477  | P | 0.200 | -0.063 |
| T06C | 2006 | 121 | 7 | 56 | 7.683  | P | 0.200 | -1.101 |
| PHL  | 2006 | 121 | 7 | 56 | 7.722  | P | 0.200 | 0.630  |
| MLAC | 2006 | 121 | 7 | 56 | 7.787  | P | 0.200 | 0.844  |
| U05C | 2006 | 121 | 7 | 56 | 7.931  | P | 0.200 | -0.396 |
| SN48 | 2006 | 121 | 7 | 56 | 8.197  | P | 0.200 | 0.434  |
| SN47 | 2006 | 121 | 7 | 56 | 8.306  | P | 0.200 | 0.450  |
| SN44 | 2006 | 121 | 7 | 56 | 8.748  | P | 0.200 | -0.062 |
| PKD  | 2006 | 121 | 7 | 56 | 8.871  | P | 0.200 | -0.268 |
| SN52 | 2006 | 121 | 7 | 56 | 9.817  | P | 0.200 | -1.023 |
| V04C | 2006 | 121 | 7 | 56 | 10.014 | P | 0.200 | 0.159  |
| O09A | 2006 | 121 | 7 | 56 | 10.075 | P | 0.200 | 0.071  |
| SN57 | 2006 | 121 | 7 | 56 | 10.279 | P | 0.200 | 0.354  |
| R07C | 2006 | 121 | 7 | 56 | 10.464 | P | 0.200 | 0.451  |
| SN53 | 2006 | 121 | 7 | 56 | 10.534 | P | 0.200 | -0.340 |
| SN54 | 2006 | 121 | 7 | 56 | 10.859 | P | 0.200 | -0.147 |
| SN55 | 2006 | 121 | 7 | 56 | 10.917 | P | 0.200 | 0.100  |

|      |      |     |   |    |        |   |       |        |
|------|------|-----|---|----|--------|---|-------|--------|
| SN51 | 2006 | 121 | 7 | 56 | 10.963 | P | 0.200 | -0.771 |
| BMN  | 2006 | 121 | 7 | 56 | 10.987 | P | 0.200 | -0.357 |
| SN67 | 2006 | 121 | 7 | 56 | 11.644 | P | 0.200 | 0.178  |
| U04C | 2006 | 121 | 7 | 56 | 11.834 | P | 0.200 | -0.342 |
| SN62 | 2006 | 121 | 7 | 56 | 12.024 | P | 0.200 | -0.863 |
| P08A | 2006 | 121 | 7 | 56 | 12.085 | P | 0.200 | -0.030 |
| Q07A | 2006 | 121 | 7 | 56 | 12.479 | P | 0.200 | 0.016  |
| S05C | 2006 | 121 | 7 | 56 | 13.123 | P | 0.200 | -0.421 |
| S06C | 2006 | 121 | 7 | 56 | 13.227 | P | 0.200 | -0.163 |
| T05C | 2006 | 121 | 7 | 56 | 13.314 | P | 0.200 | -0.298 |
| SN76 | 2006 | 121 | 7 | 56 | 13.960 | P | 0.200 | 0.189  |
| SN73 | 2006 | 121 | 7 | 56 | 13.985 | P | 0.200 | -0.531 |
| R06C | 2006 | 121 | 7 | 56 | 14.330 | P | 0.200 | 0.281  |
| SN71 | 2006 | 121 | 7 | 56 | 14.548 | P | 0.200 | -0.609 |
| O08A | 2006 | 121 | 7 | 56 | 14.983 | P | 0.200 | -0.445 |
| P07A | 2006 | 121 | 7 | 56 | 15.400 | P | 0.200 | -0.081 |
| SN85 | 2006 | 121 | 7 | 56 | 15.798 | P | 0.200 | 0.050  |
| N08A | 2006 | 121 | 7 | 56 | 16.181 | P | 0.200 | -1.311 |
| HAST | 2006 | 121 | 7 | 56 | 16.181 | P | 0.200 | -0.414 |
| SAO  | 2006 | 121 | 7 | 56 | 17.062 | P | 0.200 | -0.408 |
| O07A | 2006 | 121 | 7 | 56 | 17.407 | P | 0.200 | -0.843 |
| PACP | 2006 | 121 | 7 | 56 | 17.438 | P | 0.200 | -0.127 |
| WCN  | 2006 | 121 | 7 | 56 | 19.207 | P | 0.200 | 0.179  |
| S04C | 2006 | 121 | 7 | 56 | 19.488 | P | 0.200 | -0.112 |
| R04C | 2006 | 121 | 7 | 56 | 20.935 | P | 0.200 | 0.375  |
| MHC  | 2006 | 121 | 7 | 56 | 21.004 | P | 0.200 | 0.106  |
| LAVA | 2006 | 121 | 7 | 56 | 21.514 | P | 0.200 | -0.150 |
| O06A | 2006 | 121 | 7 | 56 | 22.509 | P | 0.200 | -0.517 |
| BNLO | 2006 | 121 | 7 | 56 | 22.841 | P | 0.200 | -0.124 |
| P05C | 2006 | 121 | 7 | 56 | 23.436 | P | 0.200 | 0.047  |
| M07A | 2006 | 121 | 7 | 56 | 23.708 | P | 0.200 | -1.620 |
| BEK  | 2006 | 121 | 7 | 56 | 24.278 | P | 0.200 | -0.210 |
| BDM  | 2006 | 121 | 7 | 56 | 24.878 | P | 0.200 | 0.516  |
| BRIB | 2006 | 121 | 7 | 56 | 26.031 | P | 0.200 | 0.279  |
| BKS  | 2006 | 121 | 7 | 56 | 26.116 | P | 0.200 | 0.026  |
| BRK  | 2006 | 121 | 7 | 56 | 26.193 | P | 0.200 | 0.098  |
| O05C | 2006 | 121 | 7 | 56 | 27.766 | P | 0.200 | 0.108  |
| Q03C | 2006 | 121 | 7 | 56 | 28.421 | P | 0.200 | 0.601  |
| SUTB | 2006 | 121 | 7 | 56 | 28.524 | P | 0.200 | -0.496 |
| CVS  | 2006 | 121 | 7 | 56 | 28.741 | P | 0.200 | -0.360 |
| ORV  | 2006 | 121 | 7 | 56 | 28.882 | P | 0.200 | 0.102  |
| ELFS | 2006 | 121 | 7 | 56 | 29.225 | P | 0.200 | -0.396 |
| O04C | 2006 | 121 | 7 | 56 | 29.535 | P | 0.200 | -0.569 |
| M06C | 2006 | 121 | 7 | 56 | 29.747 | P | 0.200 | -1.049 |
| MNRC | 2006 | 121 | 7 | 56 | 31.152 | P | 0.200 | 0.085  |
| HATC | 2006 | 121 | 7 | 56 | 33.158 | P | 0.200 | -0.850 |
| M05C | 2006 | 121 | 7 | 56 | 33.825 | P | 0.200 | -0.942 |
| O02C | 2006 | 121 | 7 | 56 | 35.792 | P | 0.200 | -2.275 |
| M03C | 2006 | 121 | 7 | 56 | 37.740 | P | 0.200 | -1.461 |
| P01C | 2006 | 121 | 7 | 56 | 38.332 | P | 0.200 | 0.193  |
| M04C | 2006 | 121 | 7 | 56 | 38.798 | P | 0.200 | -1.159 |
| L02A | 2006 | 121 | 7 | 56 | 48.248 | P | 0.200 | -1.695 |
| DBO  | 2006 | 121 | 7 | 56 | 50.764 | P | 0.200 | -1.352 |

|      |      |     |    |         |          |           |          |        |       |
|------|------|-----|----|---------|----------|-----------|----------|--------|-------|
| 2005 | 269  | 1   | 55 | 38.1736 | -5.67800 | -76.39800 | 115.0000 | 23     | 0.003 |
| HEC  | 2005 | 269 | 2  | 4       | 59.025   | P         | 0.200    | 0.418  |       |
| BBR  | 2005 | 269 | 2  | 4       | 59.496   | P         | 0.200    | 0.579  |       |
| TUQ  | 2005 | 269 | 2  | 4       | 59.517   | P         | 0.200    | 0.011  |       |
| SVD  | 2005 | 269 | 2  | 4       | 59.687   | P         | 0.200    | 0.817  |       |
| SDD  | 2005 | 269 | 2  | 4       | 59.834   | P         | 0.200    | 0.681  |       |
| RRX  | 2005 | 269 | 2  | 5       | 2.167    | P         | 0.200    | 0.309  |       |
| BFS  | 2005 | 269 | 2  | 5       | 2.243    | P         | 0.200    | -0.015 |       |
| CIA  | 2005 | 269 | 2  | 5       | 2.290    | P         | 0.200    | 0.167  |       |

|      |      |     |   |   |        |   |       |        |
|------|------|-----|---|---|--------|---|-------|--------|
| VTV  | 2005 | 269 | 2 | 5 | 2.415  | P | 0.200 | 0.364  |
| ADO  | 2005 | 269 | 2 | 5 | 3.005  | P | 0.200 | 0.572  |
| FMP  | 2005 | 269 | 2 | 5 | 3.084  | P | 0.200 | 0.199  |
| SHO  | 2005 | 269 | 2 | 5 | 3.105  | P | 0.200 | 0.096  |
| GSC  | 2005 | 269 | 2 | 5 | 3.144  | P | 0.200 | 0.233  |
| RPV  | 2005 | 269 | 2 | 5 | 3.991  | P | 0.200 | 0.515  |
| MWC  | 2005 | 269 | 2 | 5 | 4.554  | P | 0.200 | 0.512  |
| PAS  | 2005 | 269 | 2 | 5 | 4.663  | P | 0.200 | 0.560  |
| CHF  | 2005 | 269 | 2 | 5 | 4.924  | P | 0.200 | 0.587  |
| USC  | 2005 | 269 | 2 | 5 | 5.005  | P | 0.200 | 0.888  |
| DEC  | 2005 | 269 | 2 | 5 | 5.528  | P | 0.200 | 0.174  |
| VCS  | 2005 | 269 | 2 | 5 | 5.750  | P | 0.200 | 0.331  |
| DJJ  | 2005 | 269 | 2 | 5 | 5.872  | P | 0.200 | 0.518  |
| EDW2 | 2005 | 269 | 2 | 5 | 6.337  | P | 0.200 | -0.190 |
| SNCC | 2005 | 269 | 2 | 5 | 6.757  | P | 0.200 | -0.050 |
| TOV  | 2005 | 269 | 2 | 5 | 7.659  | P | 0.200 | 0.446  |
| LRL  | 2005 | 269 | 2 | 5 | 7.810  | P | 0.200 | 0.118  |
| SLA  | 2005 | 269 | 2 | 5 | 7.920  | P | 0.200 | 0.268  |
| LGU  | 2005 | 269 | 2 | 5 | 8.220  | P | 0.200 | 0.032  |
| FUR  | 2005 | 269 | 2 | 5 | 8.423  | P | 0.200 | 0.249  |
| OSI  | 2005 | 269 | 2 | 5 | 8.437  | P | 0.200 | -0.324 |
| MPM  | 2005 | 269 | 2 | 5 | 9.279  | P | 0.200 | -0.171 |
| SCZ2 | 2005 | 269 | 2 | 5 | 10.306 | P | 0.200 | -0.129 |
| ARV  | 2005 | 269 | 2 | 5 | 11.399 | P | 0.200 | 0.129  |
| ISA  | 2005 | 269 | 2 | 5 | 12.250 | P | 0.200 | 0.147  |
| SBC  | 2005 | 269 | 2 | 5 | 12.364 | P | 0.200 | -0.221 |
| GRA  | 2005 | 269 | 2 | 5 | 13.288 | P | 0.200 | 0.410  |
| CWC  | 2005 | 269 | 2 | 5 | 13.885 | P | 0.200 | 0.182  |
| BAK  | 2005 | 269 | 2 | 5 | 13.929 | P | 0.200 | 0.375  |
| MPP  | 2005 | 269 | 2 | 5 | 15.066 | P | 0.200 | -0.039 |
| VES  | 2005 | 269 | 2 | 5 | 15.530 | P | 0.200 | 0.042  |
| SDP  | 2005 | 269 | 2 | 5 | 16.726 | P | 0.200 | -0.169 |
| TIN  | 2005 | 269 | 2 | 5 | 17.165 | P | 0.200 | 0.265  |
| RCT  | 2005 | 269 | 2 | 5 | 17.554 | P | 0.200 | -0.609 |
| SMM  | 2005 | 269 | 2 | 5 | 17.759 | P | 0.200 | 0.187  |
| SN16 | 2005 | 269 | 2 | 5 | 18.611 | P | 0.200 | 0.180  |
| HELL | 2005 | 269 | 2 | 5 | 18.702 | P | 0.200 | -0.124 |
| SN11 | 2005 | 269 | 2 | 5 | 19.117 | P | 0.200 | -0.925 |
| S08C | 2005 | 269 | 2 | 5 | 19.194 | P | 0.200 | 0.321  |
| SN15 | 2005 | 269 | 2 | 5 | 19.945 | P | 0.200 | 0.200  |
| SN14 | 2005 | 269 | 2 | 5 | 20.365 | P | 0.200 | 0.321  |
| SN26 | 2005 | 269 | 2 | 5 | 20.527 | P | 0.200 | 0.112  |
| SN25 | 2005 | 269 | 2 | 5 | 20.552 | P | 0.200 | 0.069  |
| PHL  | 2005 | 269 | 2 | 5 | 20.777 | P | 0.200 | 0.254  |
| SN28 | 2005 | 269 | 2 | 5 | 20.817 | P | 0.200 | 0.406  |
| SN22 | 2005 | 269 | 2 | 5 | 20.891 | P | 0.200 | -0.861 |
| SN24 | 2005 | 269 | 2 | 5 | 21.282 | P | 0.200 | -0.058 |
| SN23 | 2005 | 269 | 2 | 5 | 21.325 | P | 0.200 | -0.394 |
| U05C | 2005 | 269 | 2 | 5 | 21.620 | P | 0.200 | -0.612 |
| SN36 | 2005 | 269 | 2 | 5 | 21.795 | P | 0.200 | 0.091  |
| SN37 | 2005 | 269 | 2 | 5 | 21.985 | P | 0.200 | 0.329  |
| T06C | 2005 | 269 | 2 | 5 | 22.015 | P | 0.200 | -1.130 |
| SN34 | 2005 | 269 | 2 | 5 | 22.147 | P | 0.200 | -0.033 |
| PKD  | 2005 | 269 | 2 | 5 | 22.184 | P | 0.200 | -0.454 |
| SN38 | 2005 | 269 | 2 | 5 | 22.227 | P | 0.200 | 0.381  |
| SN42 | 2005 | 269 | 2 | 5 | 22.741 | P | 0.200 | -1.013 |
| MNV  | 2005 | 269 | 2 | 5 | 22.794 | P | 0.200 | 0.160  |
| MLAC | 2005 | 269 | 2 | 5 | 22.835 | P | 0.200 | 0.663  |
| RAMR | 2005 | 269 | 2 | 5 | 22.889 | P | 0.200 | -0.067 |
| V04C | 2005 | 269 | 2 | 5 | 22.890 | P | 0.200 | -0.070 |
| SN44 | 2005 | 269 | 2 | 5 | 23.353 | P | 0.200 | -0.266 |
| SN46 | 2005 | 269 | 2 | 5 | 23.424 | P | 0.200 | 0.165  |
| SN48 | 2005 | 269 | 2 | 5 | 23.464 | P | 0.200 | 0.240  |

|      |      |     |   |   |        |   |       |        |
|------|------|-----|---|---|--------|---|-------|--------|
| SN47 | 2005 | 269 | 2 | 5 | 23.476 | P | 0.200 | 0.317  |
| SN43 | 2005 | 269 | 2 | 5 | 23.480 | P | 0.200 | -0.669 |
| SN45 | 2005 | 269 | 2 | 5 | 23.575 | P | 0.200 | -0.041 |
| SN52 | 2005 | 269 | 2 | 5 | 24.130 | P | 0.200 | -0.970 |
| SN53 | 2005 | 269 | 2 | 5 | 24.633 | P | 0.200 | -0.634 |
| SN51 | 2005 | 269 | 2 | 5 | 25.025 | P | 0.200 | -0.755 |
| U04C | 2005 | 269 | 2 | 5 | 25.066 | P | 0.200 | -0.311 |
| SN57 | 2005 | 269 | 2 | 5 | 25.293 | P | 0.200 | 0.305  |
| R07C | 2005 | 269 | 2 | 5 | 25.353 | P | 0.200 | 0.360  |
| SN54 | 2005 | 269 | 2 | 5 | 25.410 | P | 0.200 | -0.141 |
| SN56 | 2005 | 269 | 2 | 5 | 25.487 | P | 0.200 | 0.291  |
| SN55 | 2005 | 269 | 2 | 5 | 25.489 | P | 0.200 | -0.057 |
| SN62 | 2005 | 269 | 2 | 5 | 26.230 | P | 0.200 | -0.708 |
| V03C | 2005 | 269 | 2 | 5 | 26.352 | P | 0.200 | 0.245  |
| SN63 | 2005 | 269 | 2 | 5 | 26.530 | P | 0.200 | -0.305 |
| SN67 | 2005 | 269 | 2 | 5 | 26.610 | P | 0.200 | 0.296  |
| SN64 | 2005 | 269 | 2 | 5 | 26.685 | P | 0.200 | -0.086 |
| T05C | 2005 | 269 | 2 | 5 | 26.783 | P | 0.200 | -0.199 |
| S05C | 2005 | 269 | 2 | 5 | 27.102 | P | 0.200 | -0.176 |
| SN66 | 2005 | 269 | 2 | 5 | 27.148 | P | 0.200 | 0.371  |
| SN65 | 2005 | 269 | 2 | 5 | 27.216 | P | 0.200 | 0.339  |
| SN73 | 2005 | 269 | 2 | 5 | 28.070 | P | 0.200 | -0.400 |
| SN74 | 2005 | 269 | 2 | 5 | 28.316 | P | 0.200 | -0.094 |
| SN71 | 2005 | 269 | 2 | 5 | 28.442 | P | 0.200 | -0.394 |
| SN75 | 2005 | 269 | 2 | 5 | 28.602 | P | 0.200 | 0.449  |
| HAST | 2005 | 269 | 2 | 5 | 28.792 | P | 0.200 | -0.230 |
| R06C | 2005 | 269 | 2 | 5 | 29.015 | P | 0.200 | 0.403  |
| SCZ  | 2005 | 269 | 2 | 5 | 29.252 | P | 0.200 | 0.142  |
| SAO  | 2005 | 269 | 2 | 5 | 29.653 | P | 0.200 | -0.367 |
| SN85 | 2005 | 269 | 2 | 5 | 29.808 | P | 0.200 | -0.019 |
| SN84 | 2005 | 269 | 2 | 5 | 29.900 | P | 0.200 | -0.159 |
| CMB  | 2005 | 269 | 2 | 5 | 30.231 | P | 0.200 | -0.266 |
| PACP | 2005 | 269 | 2 | 5 | 30.265 | P | 0.200 | -0.019 |
| SN86 | 2005 | 269 | 2 | 5 | 30.450 | P | 0.200 | 0.286  |
| SN95 | 2005 | 269 | 2 | 5 | 31.187 | P | 0.200 | -0.137 |
| S04C | 2005 | 269 | 2 | 5 | 32.381 | P | 0.200 | 0.089  |
| R05C | 2005 | 269 | 2 | 5 | 32.517 | P | 0.200 | 0.329  |
| MHC  | 2005 | 269 | 2 | 5 | 33.519 | P | 0.200 | 0.245  |
| R04C | 2005 | 269 | 2 | 5 | 34.159 | P | 0.200 | 0.546  |
| BNLO | 2005 | 269 | 2 | 5 | 34.543 | P | 0.200 | -0.277 |
| LAVA | 2005 | 269 | 2 | 5 | 34.847 | P | 0.200 | -0.076 |
| WENL | 2005 | 269 | 2 | 5 | 35.282 | P | 0.200 | 0.638  |
| JRSC | 2005 | 269 | 2 | 5 | 35.997 | P | 0.200 | 0.060  |
| P05C | 2005 | 269 | 2 | 5 | 37.087 | P | 0.200 | 0.413  |
| BDM  | 2005 | 269 | 2 | 5 | 37.118 | P | 0.200 | 0.593  |
| BRIB | 2005 | 269 | 2 | 5 | 37.827 | P | 0.200 | 0.198  |
| BRK  | 2005 | 269 | 2 | 5 | 37.927 | P | 0.200 | 0.101  |
| BKS  | 2005 | 269 | 2 | 5 | 37.976 | P | 0.200 | 0.114  |
| Q04C | 2005 | 269 | 2 | 5 | 38.342 | P | 0.200 | 0.446  |
| FARB | 2005 | 269 | 2 | 5 | 40.194 | P | 0.200 | -0.345 |
| CVS  | 2005 | 269 | 2 | 5 | 40.373 | P | 0.200 | -0.255 |
| Q03C | 2005 | 269 | 2 | 5 | 40.592 | P | 0.200 | 0.768  |
| SUTB | 2005 | 269 | 2 | 5 | 40.933 | P | 0.200 | -0.250 |
| ORV  | 2005 | 269 | 2 | 5 | 41.587 | P | 0.200 | 0.421  |
| ELFS | 2005 | 269 | 2 | 5 | 42.694 | P | 0.200 | 0.083  |
| O04C | 2005 | 269 | 2 | 5 | 42.725 | P | 0.200 | -0.054 |
| MNRC | 2005 | 269 | 2 | 5 | 42.934 | P | 0.200 | 0.338  |
| M06C | 2005 | 269 | 2 | 5 | 43.666 | P | 0.200 | -0.181 |
| O03C | 2005 | 269 | 2 | 5 | 44.209 | P | 0.200 | -1.003 |
| HATC | 2005 | 269 | 2 | 5 | 45.958 | P | 0.200 | -0.317 |
| HOPS | 2005 | 269 | 2 | 5 | 46.210 | P | 0.200 | 0.536  |
| M05C | 2005 | 269 | 2 | 5 | 46.952 | P | 0.200 | -0.226 |
| GASB | 2005 | 269 | 2 | 5 | 47.259 | P | 0.200 | 0.367  |

|      |      |     |   |   |        |   |       |        |
|------|------|-----|---|---|--------|---|-------|--------|
| WDC  | 2005 | 269 | 2 | 5 | 48.046 | P | 0.200 | -1.637 |
| P01C | 2005 | 269 | 2 | 5 | 49.152 | P | 0.200 | 0.377  |
| M03C | 2005 | 269 | 2 | 5 | 49.794 | P | 0.200 | -0.970 |
| M04C | 2005 | 269 | 2 | 5 | 51.203 | P | 0.200 | -0.494 |
| M02C | 2005 | 269 | 2 | 5 | 53.081 | P | 0.200 | -1.118 |
| N02C | 2005 | 269 | 2 | 5 | 53.348 | P | 0.200 | -0.480 |
| YBH  | 2005 | 269 | 2 | 5 | 53.588 | P | 0.200 | -1.331 |
| JCC  | 2005 | 269 | 2 | 5 | 56.778 | P | 0.200 | 0.138  |
| HUMO | 2005 | 269 | 2 | 5 | 58.370 | P | 0.200 | -0.841 |
| DBO  | 2005 | 269 | 2 | 6 | 1.462  | P | 0.200 | -0.801 |
| TAKO | 2005 | 269 | 2 | 6 | 7.633  | P | 0.200 | -0.158 |

|      |     |    |    |         |         |           |         |     |       |
|------|-----|----|----|---------|---------|-----------|---------|-----|-------|
| 2006 | 291 | 21 | 15 | 50.2014 | 4.82000 | -82.65200 | 20.4000 | 234 | 0.006 |
|------|-----|----|----|---------|---------|-----------|---------|-----|-------|

|      |      |     |    |    |        |   |       |        |
|------|------|-----|----|----|--------|---|-------|--------|
| V11A | 2006 | 291 | 21 | 23 | 49.904 | P | 0.200 | 0.387  |
| HEC  | 2006 | 291 | 21 | 23 | 49.936 | P | 0.200 | 0.542  |
| TUQ  | 2006 | 291 | 21 | 23 | 50.335 | P | 0.200 | 0.148  |
| SVD  | 2006 | 291 | 21 | 23 | 50.785 | P | 0.200 | 0.657  |
| U11A | 2006 | 291 | 21 | 23 | 52.789 | P | 0.200 | 0.571  |
| RRX  | 2006 | 291 | 21 | 23 | 53.701 | P | 0.200 | 0.524  |
| VTV  | 2006 | 291 | 21 | 23 | 53.739 | P | 0.200 | 0.159  |
| CIA  | 2006 | 291 | 21 | 23 | 54.404 | P | 0.200 | 0.040  |
| SHO  | 2006 | 291 | 21 | 23 | 54.425 | P | 0.200 | 0.335  |
| GSC  | 2006 | 291 | 21 | 23 | 54.639 | P | 0.200 | 0.447  |
| RPV  | 2006 | 291 | 21 | 23 | 56.041 | P | 0.200 | 0.300  |
| MWC  | 2006 | 291 | 21 | 23 | 56.346 | P | 0.200 | 0.243  |
| PAS  | 2006 | 291 | 21 | 23 | 56.484 | P | 0.200 | 0.250  |
| CHF  | 2006 | 291 | 21 | 23 | 56.759 | P | 0.200 | 0.365  |
| VCS  | 2006 | 291 | 21 | 23 | 57.687 | P | 0.200 | 0.167  |
| U10A | 2006 | 291 | 21 | 23 | 57.886 | P | 0.200 | 0.900  |
| DEC  | 2006 | 291 | 21 | 23 | 57.998 | P | 0.200 | 0.367  |
| DJJ  | 2006 | 291 | 21 | 23 | 58.117 | P | 0.200 | 0.442  |
| EDW2 | 2006 | 291 | 21 | 23 | 58.553 | P | 0.200 | -0.089 |
| SLA  | 2006 | 291 | 21 | 23 | 59.685 | P | 0.200 | 0.216  |
| LRL  | 2006 | 291 | 21 | 24 | 0.069  | P | 0.200 | 0.357  |
| FUR  | 2006 | 291 | 21 | 24 | 0.348  | P | 0.200 | 0.492  |
| OSI  | 2006 | 291 | 21 | 24 | 1.383  | P | 0.200 | -0.016 |
| MPM  | 2006 | 291 | 21 | 24 | 1.395  | P | 0.200 | -0.048 |
| ARV  | 2006 | 291 | 21 | 24 | 4.474  | P | 0.200 | 0.357  |
| ISA  | 2006 | 291 | 21 | 24 | 5.012  | P | 0.200 | 0.252  |
| GRA  | 2006 | 291 | 21 | 24 | 5.797  | P | 0.200 | 0.716  |
| Q11A | 2006 | 291 | 21 | 24 | 6.208  | P | 0.200 | 0.447  |
| CWC  | 2006 | 291 | 21 | 24 | 6.547  | P | 0.200 | 0.291  |
| R10A | 2006 | 291 | 21 | 24 | 7.036  | P | 0.200 | 0.935  |
| S09A | 2006 | 291 | 21 | 24 | 7.981  | P | 0.200 | 0.101  |
| VES  | 2006 | 291 | 21 | 24 | 8.951  | P | 0.200 | 0.324  |
| TPH  | 2006 | 291 | 21 | 24 | 9.819  | P | 0.200 | 0.233  |
| R09A | 2006 | 291 | 21 | 24 | 9.983  | P | 0.200 | 0.312  |
| TIN  | 2006 | 291 | 21 | 24 | 10.265 | P | 0.200 | 0.520  |
| SMM  | 2006 | 291 | 21 | 24 | 11.590 | P | 0.200 | 0.236  |
| HELL | 2006 | 291 | 21 | 24 | 12.280 | P | 0.200 | 0.120  |
| S08C | 2006 | 291 | 21 | 24 | 12.291 | P | 0.200 | 0.466  |
| Q09A | 2006 | 291 | 21 | 24 | 13.521 | P | 0.200 | 0.409  |
| P10A | 2006 | 291 | 21 | 24 | 13.889 | P | 0.200 | 0.338  |
| PHL  | 2006 | 291 | 21 | 24 | 14.610 | P | 0.200 | -0.121 |
| R08A | 2006 | 291 | 21 | 24 | 15.821 | P | 0.200 | 0.534  |
| T06C | 2006 | 291 | 21 | 24 | 15.838 | P | 0.200 | -1.243 |
| MLAC | 2006 | 291 | 21 | 24 | 15.898 | P | 0.200 | 0.250  |
| SN43 | 2006 | 291 | 21 | 24 | 17.397 | P | 0.200 | -0.624 |
| PKD  | 2006 | 291 | 21 | 24 | 16.507 | P | 0.200 | -0.429 |
| Q08A | 2006 | 291 | 21 | 24 | 16.810 | P | 0.200 | 0.042  |
| R07C | 2006 | 291 | 21 | 24 | 19.160 | P | 0.200 | 0.408  |
| O09A | 2006 | 291 | 21 | 24 | 19.899 | P | 0.200 | 0.234  |
| S05C | 2006 | 291 | 21 | 24 | 21.172 | P | 0.200 | -0.569 |

|      |      |     |    |    |        |   |       |        |
|------|------|-----|----|----|--------|---|-------|--------|
| Q07A | 2006 | 291 | 21 | 24 | 21.568 | P | 0.200 | 0.128  |
| S06C | 2006 | 291 | 21 | 24 | 21.641 | P | 0.200 | -0.208 |
| R06C | 2006 | 291 | 21 | 24 | 23.147 | P | 0.200 | 0.365  |
| HAST | 2006 | 291 | 21 | 24 | 23.781 | P | 0.200 | -0.429 |
| CMB  | 2006 | 291 | 21 | 24 | 24.627 | P | 0.200 | -0.535 |
| SAO  | 2006 | 291 | 21 | 24 | 24.638 | P | 0.200 | -0.566 |
| O08A | 2006 | 291 | 21 | 24 | 24.649 | P | 0.200 | -0.202 |
| P07A | 2006 | 291 | 21 | 24 | 24.677 | P | 0.200 | 0.108  |
| PACP | 2006 | 291 | 21 | 24 | 25.023 | P | 0.200 | -0.379 |
| SN97 | 2006 | 291 | 21 | 24 | 26.294 | P | 0.200 | 0.408  |
| SNA8 | 2006 | 291 | 21 | 24 | 26.355 | P | 0.200 | 0.192  |
| SN96 | 2006 | 291 | 21 | 24 | 25.759 | P | 0.200 | 0.183  |
| SN93 | 2006 | 291 | 21 | 24 | 26.492 | P | 0.200 | -0.200 |
| SNA7 | 2006 | 291 | 21 | 24 | 27.631 | P | 0.200 | 0.378  |
| O07A | 2006 | 291 | 21 | 24 | 26.747 | P | 0.200 | -0.689 |
| SNA4 | 2006 | 291 | 21 | 24 | 27.876 | P | 0.200 | -0.096 |
| R05C | 2006 | 291 | 21 | 24 | 27.143 | P | 0.200 | 0.310  |
| SNA3 | 2006 | 291 | 21 | 24 | 28.320 | P | 0.200 | 0.053  |
| S04C | 2006 | 291 | 21 | 24 | 27.430 | P | 0.200 | -0.106 |
| WCN  | 2006 | 291 | 21 | 24 | 27.940 | P | 0.200 | 0.122  |
| SNB5 | 2006 | 291 | 21 | 24 | 29.493 | P | 0.200 | -0.039 |
| SNB3 | 2006 | 291 | 21 | 24 | 30.210 | P | 0.200 | -0.180 |
| R04C | 2006 | 291 | 21 | 24 | 29.263 | P | 0.200 | 0.489  |
| SNC4 | 2006 | 291 | 21 | 24 | 30.954 | P | 0.200 | -0.446 |
| N07B | 2006 | 291 | 21 | 24 | 29.960 | P | 0.200 | -0.855 |
| SNC7 | 2006 | 291 | 21 | 24 | 31.011 | P | 0.200 | 0.015  |
| SNC5 | 2006 | 291 | 21 | 24 | 31.072 | P | 0.200 | -0.324 |
| SND8 | 2006 | 291 | 21 | 24 | 31.678 | P | 0.200 | 0.083  |
| SND5 | 2006 | 291 | 21 | 24 | 32.325 | P | 0.200 | -0.565 |
| O06A | 2006 | 291 | 21 | 24 | 31.931 | P | 0.200 | -0.005 |
| SNC3 | 2006 | 291 | 21 | 24 | 32.091 | P | 0.200 | 0.056  |
| SND7 | 2006 | 291 | 21 | 24 | 33.254 | P | 0.200 | 0.019  |
| SND4 | 2006 | 291 | 21 | 24 | 32.711 | P | 0.200 | -0.635 |
| SNE6 | 2006 | 291 | 21 | 24 | 33.860 | P | 0.200 | 0.021  |
| BEK  | 2006 | 291 | 21 | 24 | 33.146 | P | 0.200 | -0.055 |
| SNE5 | 2006 | 291 | 21 | 24 | 34.484 | P | 0.200 | -0.398 |
| M07A | 2006 | 291 | 21 | 24 | 33.609 | P | 0.200 | -1.016 |
| SNE4 | 2006 | 291 | 21 | 24 | 34.643 | P | 0.200 | -0.425 |
| SNE7 | 2006 | 291 | 21 | 24 | 34.817 | P | 0.200 | 0.113  |
| SNE9 | 2006 | 291 | 21 | 24 | 33.896 | P | 0.200 | 0.734  |
| N06A | 2006 | 291 | 21 | 24 | 34.252 | P | 0.200 | -0.370 |
| SNF6 | 2006 | 291 | 21 | 24 | 35.794 | P | 0.200 | -0.187 |
| SNF9 | 2006 | 291 | 21 | 24 | 35.247 | P | 0.200 | 0.443  |
| O05C | 2006 | 291 | 21 | 24 | 36.545 | P | 0.200 | 0.315  |
| SUTB | 2006 | 291 | 21 | 24 | 36.817 | P | 0.200 | -0.377 |
| SNG5 | 2006 | 291 | 21 | 24 | 38.112 | P | 0.200 | -0.009 |
| ORV  | 2006 | 291 | 21 | 24 | 37.371 | P | 0.200 | 0.269  |
| L07A | 2006 | 291 | 21 | 24 | 37.906 | P | 0.200 | -0.458 |
| ELFS | 2006 | 291 | 21 | 24 | 38.475 | P | 0.200 | 0.110  |
| O04C | 2006 | 291 | 21 | 24 | 38.583 | P | 0.200 | -0.101 |
| MNRC | 2006 | 291 | 21 | 24 | 39.036 | P | 0.200 | 0.045  |
| M06C | 2006 | 291 | 21 | 24 | 39.363 | P | 0.200 | -0.329 |
| WDC  | 2006 | 291 | 21 | 24 | 43.965 | P | 0.200 | -2.667 |
| GASB | 2006 | 291 | 21 | 24 | 43.966 | P | 0.200 | 0.269  |
| L05A | 2006 | 291 | 21 | 24 | 45.017 | P | 0.200 | -0.257 |
| M04C | 2006 | 291 | 21 | 24 | 47.991 | P | 0.200 | -0.610 |
| K05A | 2006 | 291 | 21 | 24 | 48.573 | P | 0.200 | -0.093 |
| L04A | 2006 | 291 | 21 | 24 | 49.903 | P | 0.200 | -0.693 |
| N02C | 2006 | 291 | 21 | 24 | 50.658 | P | 0.200 | -0.677 |
| K04A | 2006 | 291 | 21 | 24 | 51.125 | P | 0.200 | -0.687 |
| J05A | 2006 | 291 | 21 | 24 | 52.214 | P | 0.200 | -0.441 |
| K02A | 2006 | 291 | 21 | 24 | 59.101 | P | 0.200 | -1.213 |

|      |      |     |    |         |          |           |         |        |        |
|------|------|-----|----|---------|----------|-----------|---------|--------|--------|
| 2006 | 178  | 13  | 3  | 12.8865 | 14.96000 | -94.18000 | 28.9000 | 144    | -0.008 |
| HEC  | 2006 | 178 | 13 | 9       | 2.127    | P         | 0.200   | 0.116  |        |
| BBR  | 2006 | 178 | 13 | 9       | 2.593    | P         | 0.200   | 0.181  |        |
| TUQ  | 2006 | 178 | 13 | 9       | 2.971    | P         | 0.200   | -0.283 |        |
| RRX  | 2006 | 178 | 13 | 9       | 5.998    | P         | 0.200   | -0.038 |        |
| CIA  | 2006 | 178 | 13 | 9       | 6.141    | P         | 0.200   | -0.598 |        |
| BFS  | 2006 | 178 | 13 | 9       | 6.148    | P         | 0.200   | -0.455 |        |
| FMP  | 2006 | 178 | 13 | 9       | 7.124    | P         | 0.200   | -0.396 |        |
| GSC  | 2006 | 178 | 13 | 9       | 7.397    | P         | 0.200   | 0.035  |        |
| SHO  | 2006 | 178 | 13 | 9       | 7.595    | P         | 0.200   | -0.109 |        |
| MWC  | 2006 | 178 | 13 | 9       | 8.639    | P         | 0.200   | -0.238 |        |
| PAS  | 2006 | 178 | 13 | 9       | 8.721    | P         | 0.200   | -0.305 |        |
| CHF  | 2006 | 178 | 13 | 9       | 9.069    | P         | 0.200   | -0.178 |        |
| DEC  | 2006 | 178 | 13 | 9       | 10.335   | P         | 0.200   | -0.239 |        |
| DJJ  | 2006 | 178 | 13 | 9       | 10.553   | P         | 0.200   | 0.008  |        |
| EDW2 | 2006 | 178 | 13 | 9       | 11.278   | P         | 0.200   | -0.622 |        |
| U10A | 2006 | 178 | 13 | 9       | 11.584   | P         | 0.200   | 0.477  |        |
| LRL  | 2006 | 178 | 13 | 9       | 13.277   | P         | 0.200   | -0.089 |        |
| LGU  | 2006 | 178 | 13 | 9       | 13.898   | P         | 0.200   | -0.330 |        |
| FUR  | 2006 | 178 | 13 | 9       | 14.173   | P         | 0.200   | -0.001 |        |
| OSI  | 2006 | 178 | 13 | 9       | 14.365   | P         | 0.200   | -0.403 |        |
| TPNV | 2006 | 178 | 13 | 9       | 14.603   | P         | 0.200   | 0.721  |        |
| MPM  | 2006 | 178 | 13 | 9       | 15.258   | P         | 0.200   | -0.296 |        |
| ARV  | 2006 | 178 | 13 | 9       | 17.697   | P         | 0.200   | -0.244 |        |
| ISA  | 2006 | 178 | 13 | 9       | 18.876   | P         | 0.200   | 0.020  |        |
| GRA  | 2006 | 178 | 13 | 9       | 20.433   | P         | 0.200   | 0.386  |        |
| CWC  | 2006 | 178 | 13 | 9       | 21.010   | P         | 0.200   | 0.117  |        |
| VES  | 2006 | 178 | 13 | 9       | 23.016   | P         | 0.200   | -0.123 |        |
| R10A | 2006 | 178 | 13 | 9       | 23.039   | P         | 0.200   | 0.787  |        |
| Q11A | 2006 | 178 | 13 | 9       | 23.140   | P         | 0.200   | 0.644  |        |
| S09A | 2006 | 178 | 13 | 9       | 23.485   | P         | 0.200   | -0.097 |        |
| TIN  | 2006 | 178 | 13 | 9       | 25.413   | P         | 0.200   | 0.370  |        |
| SMM  | 2006 | 178 | 13 | 9       | 26.054   | P         | 0.200   | 0.185  |        |
| R09A | 2006 | 178 | 13 | 9       | 26.063   | P         | 0.200   | 0.164  |        |
| RCT  | 2006 | 178 | 13 | 9       | 26.433   | P         | 0.200   | -0.062 |        |
| SN16 | 2006 | 178 | 13 | 9       | 27.217   | P         | 0.200   | 0.245  |        |
| S08C | 2006 | 178 | 13 | 9       | 27.862   | P         | 0.200   | 0.327  |        |
| V05C | 2006 | 178 | 13 | 9       | 28.416   | P         | 0.200   | 0.344  |        |
| SN11 | 2006 | 178 | 13 | 9       | 28.471   | P         | 0.200   | -0.501 |        |
| SN15 | 2006 | 178 | 13 | 9       | 28.817   | P         | 0.200   | 0.295  |        |
| PHL  | 2006 | 178 | 13 | 9       | 29.325   | P         | 0.200   | -0.232 |        |
| SN21 | 2006 | 178 | 13 | 9       | 29.693   | P         | 0.200   | -1.016 |        |
| SN26 | 2006 | 178 | 13 | 9       | 29.763   | P         | 0.200   | 0.284  |        |
| SN25 | 2006 | 178 | 13 | 9       | 29.789   | P         | 0.200   | 0.289  |        |
| SN28 | 2006 | 178 | 13 | 9       | 30.109   | P         | 0.200   | 0.553  |        |
| Q09A | 2006 | 178 | 13 | 9       | 30.689   | P         | 0.200   | 0.682  |        |
| SN24 | 2006 | 178 | 13 | 9       | 30.706   | P         | 0.200   | 0.153  |        |
| SN23 | 2006 | 178 | 13 | 9       | 30.921   | P         | 0.200   | -0.050 |        |
| SN36 | 2006 | 178 | 13 | 9       | 31.192   | P         | 0.200   | 0.125  |        |
| U05C | 2006 | 178 | 13 | 9       | 31.333   | P         | 0.200   | -0.368 |        |
| SN37 | 2006 | 178 | 13 | 9       | 31.657   | P         | 0.200   | 0.549  |        |
| T06C | 2006 | 178 | 13 | 9       | 31.732   | P         | 0.200   | -1.125 |        |
| P10A | 2006 | 178 | 13 | 9       | 31.779   | P         | 0.200   | 0.497  |        |
| SN34 | 2006 | 178 | 13 | 9       | 31.807   | P         | 0.200   | 0.166  |        |
| PKD  | 2006 | 178 | 13 | 9       | 31.829   | P         | 0.200   | -0.348 |        |
| SN38 | 2006 | 178 | 13 | 9       | 32.125   | P         | 0.200   | 0.688  |        |
| R08A | 2006 | 178 | 13 | 9       | 32.358   | P         | 0.200   | 0.524  |        |
| V04C | 2006 | 178 | 13 | 9       | 32.370   | P         | 0.200   | -0.253 |        |
| MNV  | 2006 | 178 | 13 | 9       | 33.086   | P         | 0.200   | 0.523  |        |
| SN44 | 2006 | 178 | 13 | 9       | 33.336   | P         | 0.200   | -0.084 |        |
| SN47 | 2006 | 178 | 13 | 9       | 33.654   | P         | 0.200   | 0.616  |        |
| SN43 | 2006 | 178 | 13 | 9       | 33.679   | P         | 0.200   | -0.415 |        |
| SN48 | 2006 | 178 | 13 | 9       | 33.878   | P         | 0.200   | 0.719  |        |



|      |      |     |    |   |        |   |       |        |
|------|------|-----|----|---|--------|---|-------|--------|
| SN52 | 2006 | 178 | 13 | 9 | 34.264 | P | 0.200 | -1.053 |
| Q08A | 2006 | 178 | 13 | 9 | 34.361 | P | 0.200 | 0.498  |
| P09A | 2006 | 178 | 13 | 9 | 34.597 | P | 0.200 | 0.469  |
| U04C | 2006 | 178 | 13 | 9 | 35.130 | P | 0.200 | -0.574 |
| SN51 | 2006 | 178 | 13 | 9 | 35.233 | P | 0.200 | -0.909 |
| SN54 | 2006 | 178 | 13 | 9 | 35.793 | P | 0.200 | -0.144 |
| SN57 | 2006 | 178 | 13 | 9 | 35.832 | P | 0.200 | 0.546  |
| SN56 | 2006 | 178 | 13 | 9 | 35.911 | P | 0.200 | 0.414  |
| SN55 | 2006 | 178 | 13 | 9 | 35.962 | P | 0.200 | 0.087  |
| R07C | 2006 | 178 | 13 | 9 | 36.102 | P | 0.200 | 0.765  |
| V03C | 2006 | 178 | 13 | 9 | 36.469 | P | 0.200 | -0.204 |
| T05C | 2006 | 178 | 13 | 9 | 37.169 | P | 0.200 | -0.534 |
| S05C | 2006 | 178 | 13 | 9 | 37.333 | P | 0.200 | -0.750 |
| SN64 | 2006 | 178 | 13 | 9 | 37.427 | P | 0.200 | -0.024 |
| SN67 | 2006 | 178 | 13 | 9 | 37.523 | P | 0.200 | 0.514  |
| SN66 | 2006 | 178 | 13 | 9 | 38.124 | P | 0.200 | 0.583  |
| S06C | 2006 | 178 | 13 | 9 | 38.410 | P | 0.200 | -0.079 |
| O09A | 2006 | 178 | 13 | 9 | 38.591 | P | 0.200 | 0.458  |
| SN73 | 2006 | 178 | 13 | 9 | 39.173 | P | 0.200 | -0.424 |
| Q07A | 2006 | 178 | 13 | 9 | 39.327 | P | 0.200 | 0.503  |
| SN71 | 2006 | 178 | 13 | 9 | 39.457 | P | 0.200 | -0.612 |
| HAST | 2006 | 178 | 13 | 9 | 39.768 | P | 0.200 | -0.557 |
| SN76 | 2006 | 178 | 13 | 9 | 39.899 | P | 0.200 | 0.460  |
| R06C | 2006 | 178 | 13 | 9 | 40.564 | P | 0.200 | 0.634  |
| SAO  | 2006 | 178 | 13 | 9 | 40.771 | P | 0.200 | -0.780 |
| PACP | 2006 | 178 | 13 | 9 | 41.327 | P | 0.200 | -0.558 |
| SN84 | 2006 | 178 | 13 | 9 | 41.507 | P | 0.200 | -0.148 |
| SN85 | 2006 | 178 | 13 | 9 | 41.670 | P | 0.200 | 0.305  |
| CMB  | 2006 | 178 | 13 | 9 | 41.752 | P | 0.200 | -0.398 |
| P07A | 2006 | 178 | 13 | 9 | 43.268 | P | 0.200 | 0.619  |
| O08A | 2006 | 178 | 13 | 9 | 43.839 | P | 0.200 | 0.236  |
| S04C | 2006 | 178 | 13 | 9 | 44.130 | P | 0.200 | -0.364 |
| R05C | 2006 | 178 | 13 | 9 | 44.907 | P | 0.200 | 0.547  |
| MHC  | 2006 | 178 | 13 | 9 | 45.625 | P | 0.200 | -0.018 |
| O07A | 2006 | 178 | 13 | 9 | 46.387 | P | 0.200 | 0.180  |
| WCN  | 2006 | 178 | 13 | 9 | 46.619 | P | 0.200 | 0.734  |
| N08A | 2006 | 178 | 13 | 9 | 46.653 | P | 0.200 | 0.284  |
| R04C | 2006 | 178 | 13 | 9 | 46.724 | P | 0.200 | 0.489  |
| BNLO | 2006 | 178 | 13 | 9 | 47.050 | P | 0.200 | -0.553 |
| WENL | 2006 | 178 | 13 | 9 | 47.783 | P | 0.200 | 0.276  |
| LAVA | 2006 | 178 | 13 | 9 | 48.018 | P | 0.200 | 0.099  |
| JRSC | 2006 | 178 | 13 | 9 | 48.915 | P | 0.200 | -0.246 |
| P06A | 2006 | 178 | 13 | 9 | 49.167 | P | 0.200 | 0.531  |
| N07B | 2006 | 178 | 13 | 9 | 50.189 | P | 0.200 | -0.151 |
| BDM  | 2006 | 178 | 13 | 9 | 50.317 | P | 0.200 | 0.466  |
| P05C | 2006 | 178 | 13 | 9 | 50.841 | P | 0.200 | 0.573  |
| O06A | 2006 | 178 | 13 | 9 | 51.318 | P | 0.200 | 0.349  |
| BRK  | 2006 | 178 | 13 | 9 | 51.620 | P | 0.200 | 0.048  |
| BRIB | 2006 | 178 | 13 | 9 | 51.636 | P | 0.200 | 0.397  |
| BKS  | 2006 | 178 | 13 | 9 | 51.741 | P | 0.200 | 0.203  |
| Q04C | 2006 | 178 | 13 | 9 | 52.273 | P | 0.200 | 0.578  |
| BEK  | 2006 | 178 | 13 | 9 | 52.468 | P | 0.200 | 0.386  |
| FARB | 2006 | 178 | 13 | 9 | 54.484 | P | 0.200 | -0.507 |
| M07A | 2006 | 178 | 13 | 9 | 54.652 | P | 0.200 | -0.248 |
| CVS  | 2006 | 178 | 13 | 9 | 54.879 | P | 0.200 | -0.222 |
| Q03C | 2006 | 178 | 13 | 9 | 55.152 | P | 0.200 | 1.065  |
| SUTB | 2006 | 178 | 13 | 9 | 55.812 | P | 0.200 | -0.096 |
| O05C | 2006 | 178 | 13 | 9 | 56.004 | P | 0.200 | 0.625  |
| MCCM | 2006 | 178 | 13 | 9 | 56.130 | P | 0.200 | -0.304 |
| ORV  | 2006 | 178 | 13 | 9 | 56.573 | P | 0.200 | 0.505  |
| MNRC | 2006 | 178 | 13 | 9 | 58.237 | P | 0.200 | 0.536  |
| O04C | 2006 | 178 | 13 | 9 | 58.529 | P | 0.200 | 0.262  |
| ELFS | 2006 | 178 | 13 | 9 | 58.778 | P | 0.200 | 0.650  |

|      |      |     |    |    |        |   |       |        |
|------|------|-----|----|----|--------|---|-------|--------|
| L07A | 2006 | 178 | 13 | 9  | 59.444 | P | 0.200 | 0.010  |
| M06C | 2006 | 178 | 13 | 10 | 0.200  | P | 0.200 | 0.133  |
| O03C | 2006 | 178 | 13 | 10 | 1.303  | P | 0.200 | 0.073  |
| HOPS | 2006 | 178 | 13 | 10 | 2.093  | P | 0.200 | 0.434  |
| HATC | 2006 | 178 | 13 | 10 | 2.796  | P | 0.200 | -0.007 |
| GASB | 2006 | 178 | 13 | 10 | 3.769  | P | 0.200 | 0.528  |
| M05C | 2006 | 178 | 13 | 10 | 4.138  | P | 0.200 | -0.101 |
| WDC  | 2006 | 178 | 13 | 10 | 4.414  | P | 0.200 | -2.586 |
| P01C | 2006 | 178 | 13 | 10 | 6.206  | P | 0.200 | 0.634  |
| L05A | 2006 | 178 | 13 | 10 | 6.620  | P | 0.200 | -0.068 |
| M03C | 2006 | 178 | 13 | 10 | 7.448  | P | 0.200 | -1.174 |
| M04C | 2006 | 178 | 13 | 10 | 9.780  | P | 0.200 | -0.256 |
| M02C | 2006 | 178 | 13 | 10 | 11.242 | P | 0.200 | -1.724 |
| N02C | 2006 | 178 | 13 | 10 | 11.761 | P | 0.200 | -0.504 |
| O01C | 2006 | 178 | 13 | 10 | 11.834 | P | 0.200 | 0.379  |
| L04A | 2006 | 178 | 13 | 10 | 11.999 | P | 0.200 | -0.471 |
| YBH  | 2006 | 178 | 13 | 10 | 12.088 | P | 0.200 | -1.951 |
| K04A | 2006 | 178 | 13 | 10 | 13.477 | P | 0.200 | -0.644 |
| J03A | 2006 | 178 | 13 | 10 | 22.536 | P | 0.200 | -1.413 |

|      |     |    |    |         |          |           |         |     |        |
|------|-----|----|----|---------|----------|-----------|---------|-----|--------|
| 2006 | 337 | 20 | 52 | 17.6303 | 13.99400 | -91.20700 | 61.2000 | 248 | -0.007 |
|------|-----|----|----|---------|----------|-----------|---------|-----|--------|

|      |      |     |    |    |        |   |       |        |
|------|------|-----|----|----|--------|---|-------|--------|
| HEC  | 2006 | 337 | 20 | 58 | 26.896 | P | 0.200 | -0.009 |
| TUQ  | 2006 | 337 | 20 | 58 | 27.599 | P | 0.200 | -0.217 |
| SVD  | 2006 | 337 | 20 | 58 | 27.884 | P | 0.200 | 0.143  |
| BBR  | 2006 | 337 | 20 | 58 | 27.898 | P | 0.200 | 0.255  |
| VTV  | 2006 | 337 | 20 | 58 | 31.029 | P | 0.200 | -0.446 |
| RRX  | 2006 | 337 | 20 | 58 | 31.101 | P | 0.200 | 0.083  |
| BFS  | 2006 | 337 | 20 | 58 | 31.312 | P | 0.200 | -0.629 |
| ADO  | 2006 | 337 | 20 | 58 | 31.750 | P | 0.200 | -0.260 |
| CIA  | 2006 | 337 | 20 | 58 | 31.880 | P | 0.200 | -0.630 |
| GSC  | 2006 | 337 | 20 | 58 | 31.986 | P | 0.200 | -0.151 |
| SHO  | 2006 | 337 | 20 | 58 | 32.032 | P | 0.200 | -0.083 |
| FMP  | 2006 | 337 | 20 | 58 | 32.727 | P | 0.200 | -0.423 |
| MWC  | 2006 | 337 | 20 | 58 | 33.859 | P | 0.200 | -0.417 |
| CHF  | 2006 | 337 | 20 | 58 | 34.241 | P | 0.200 | -0.356 |
| PASC | 2006 | 337 | 20 | 58 | 34.330 | P | 0.200 | -0.377 |
| DEC  | 2006 | 337 | 20 | 58 | 35.675 | P | 0.200 | -0.306 |
| DJJ  | 2006 | 337 | 20 | 58 | 35.867 | P | 0.200 | -0.156 |
| EDW2 | 2006 | 337 | 20 | 58 | 36.269 | P | 0.200 | -0.747 |
| SLA  | 2006 | 337 | 20 | 58 | 37.691 | P | 0.200 | -0.247 |
| LRL  | 2006 | 337 | 20 | 58 | 38.025 | P | 0.200 | -0.159 |
| TOV  | 2006 | 337 | 20 | 58 | 38.388 | P | 0.200 | -0.069 |
| FUR  | 2006 | 337 | 20 | 58 | 38.666 | P | 0.200 | 0.228  |
| OSI  | 2006 | 337 | 20 | 58 | 39.553 | P | 0.200 | -0.525 |
| LGU  | 2006 | 337 | 20 | 58 | 39.574 | P | 0.200 | -0.197 |
| MPM  | 2006 | 337 | 20 | 58 | 39.681 | P | 0.200 | -0.405 |
| ARV  | 2006 | 337 | 20 | 58 | 42.940 | P | 0.200 | -0.127 |
| ISA  | 2006 | 337 | 20 | 58 | 43.704 | P | 0.200 | -0.010 |
| GRA  | 2006 | 337 | 20 | 58 | 44.579 | P | 0.200 | 0.406  |
| CWC  | 2006 | 337 | 20 | 58 | 45.307 | P | 0.200 | -0.066 |
| Q11A | 2006 | 337 | 20 | 58 | 46.230 | P | 0.200 | 0.778  |
| R10A | 2006 | 337 | 20 | 58 | 46.467 | P | 0.200 | 0.861  |
| S09A | 2006 | 337 | 20 | 58 | 47.236 | P | 0.200 | -0.127 |
| MPP  | 2006 | 337 | 20 | 58 | 47.677 | P | 0.200 | -0.445 |
| VES  | 2006 | 337 | 20 | 58 | 48.193 | P | 0.200 | 0.210  |
| TIN  | 2006 | 337 | 20 | 58 | 49.666 | P | 0.200 | 0.391  |
| R09A | 2006 | 337 | 20 | 58 | 49.707 | P | 0.200 | 0.291  |
| SMM  | 2006 | 337 | 20 | 58 | 51.086 | P | 0.200 | 0.059  |
| RCT  | 2006 | 337 | 20 | 58 | 51.133 | P | 0.200 | -0.038 |
| S08C | 2006 | 337 | 20 | 58 | 51.962 | P | 0.200 | 0.393  |
| HELL | 2006 | 337 | 20 | 58 | 52.021 | P | 0.200 | 0.146  |
| V05C | 2006 | 337 | 20 | 58 | 53.315 | P | 0.200 | 0.316  |
| Q09A | 2006 | 337 | 20 | 58 | 54.085 | P | 0.200 | 0.799  |

|      |      |     |    |    |        |   |       |        |
|------|------|-----|----|----|--------|---|-------|--------|
| PHL  | 2006 | 337 | 20 | 58 | 54.462 | P | 0.200 | -0.267 |
| R08A | 2006 | 337 | 20 | 58 | 56.123 | P | 0.200 | 0.633  |
| U05C | 2006 | 337 | 20 | 58 | 56.159 | P | 0.200 | -0.307 |
| T06C | 2006 | 337 | 20 | 58 | 56.186 | P | 0.200 | -1.116 |
| MLAC | 2006 | 337 | 20 | 58 | 56.244 | P | 0.200 | 0.484  |
| PKD  | 2006 | 337 | 20 | 58 | 56.799 | P | 0.200 | -0.328 |
| SN43 | 2006 | 337 | 20 | 58 | 57.886 | P | 0.200 | -0.444 |
| P09A | 2006 | 337 | 20 | 58 | 57.360 | P | 0.200 | 0.289  |
| RAMR | 2006 | 337 | 20 | 58 | 57.538 | P | 0.200 | -0.190 |
| Q08A | 2006 | 337 | 20 | 58 | 57.771 | P | 0.200 | 0.512  |
| R07C | 2006 | 337 | 20 | 58 | 59.813 | P | 0.200 | 0.583  |
| V03C | 2006 | 337 | 20 | 59 | 1.507  | P | 0.200 | -0.134 |
| S05C | 2006 | 337 | 20 | 59 | 1.706  | P | 0.200 | -0.730 |
| T05C | 2006 | 337 | 20 | 59 | 1.760  | P | 0.200 | -0.514 |
| S06C | 2006 | 337 | 20 | 59 | 2.605  | P | 0.200 | 0.035  |
| Q07A | 2006 | 337 | 20 | 59 | 2.882  | P | 0.200 | 0.568  |
| R06C | 2006 | 337 | 20 | 59 | 4.335  | P | 0.200 | 0.662  |
| HAST | 2006 | 337 | 20 | 59 | 4.478  | P | 0.200 | -0.678 |
| SAO  | 2006 | 337 | 20 | 59 | 5.422  | P | 0.200 | -0.811 |
| CMB  | 2006 | 337 | 20 | 59 | 5.787  | P | 0.200 | -0.419 |
| P07A | 2006 | 337 | 20 | 59 | 6.516  | P | 0.200 | 0.652  |
| SN97 | 2006 | 337 | 20 | 59 | 7.862  | P | 0.200 | 0.764  |
| SNA8 | 2006 | 337 | 20 | 59 | 7.957  | P | 0.200 | 0.498  |
| SN96 | 2006 | 337 | 20 | 59 | 7.193  | P | 0.200 | 0.479  |
| SN93 | 2006 | 337 | 20 | 59 | 7.773  | P | 0.200 | -0.169 |
| SNA7 | 2006 | 337 | 20 | 59 | 9.408  | P | 0.200 | 0.791  |
| SNA4 | 2006 | 337 | 20 | 59 | 9.461  | P | 0.200 | 0.097  |
| S04C | 2006 | 337 | 20 | 59 | 8.519  | P | 0.200 | -0.328 |
| R05C | 2006 | 337 | 20 | 59 | 8.723  | P | 0.200 | 0.628  |
| SNA3 | 2006 | 337 | 20 | 59 | 9.825  | P | 0.200 | 0.150  |
| N08A | 2006 | 337 | 20 | 59 | 8.829  | P | 0.200 | -0.078 |
| WCN  | 2006 | 337 | 20 | 59 | 9.786  | P | 0.200 | 0.473  |
| MHC  | 2006 | 337 | 20 | 59 | 10.004 | P | 0.200 | -0.095 |
| SNB5 | 2006 | 337 | 20 | 59 | 11.519 | P | 0.200 | 0.408  |
| R04C | 2006 | 337 | 20 | 59 | 10.916 | P | 0.200 | 0.665  |
| SNB3 | 2006 | 337 | 20 | 59 | 12.201 | P | 0.200 | 0.166  |
| LAVA | 2006 | 337 | 20 | 59 | 11.779 | P | 0.200 | 0.081  |
| SNC4 | 2006 | 337 | 20 | 59 | 13.132 | P | 0.200 | -0.075 |
| SNC7 | 2006 | 337 | 20 | 59 | 13.245 | P | 0.200 | 0.461  |
| SNC5 | 2006 | 337 | 20 | 59 | 13.307 | P | 0.200 | 0.123  |
| WENL | 2006 | 337 | 20 | 59 | 12.454 | P | 0.200 | 0.603  |
| P06A | 2006 | 337 | 20 | 59 | 12.586 | P | 0.200 | 0.656  |
| N07B | 2006 | 337 | 20 | 59 | 13.045 | P | 0.200 | 0.029  |
| SND8 | 2006 | 337 | 20 | 59 | 14.096 | P | 0.200 | 0.574  |
| JRSC | 2006 | 337 | 20 | 59 | 13.655 | P | 0.200 | 0.033  |
| SND5 | 2006 | 337 | 20 | 59 | 14.840 | P | 0.200 | -0.039 |
| SNC3 | 2006 | 337 | 20 | 59 | 14.260 | P | 0.200 | 0.408  |
| O06A | 2006 | 337 | 20 | 59 | 14.464 | P | 0.200 | 0.424  |
| BDM  | 2006 | 337 | 20 | 59 | 14.709 | P | 0.200 | 0.650  |
| SND7 | 2006 | 337 | 20 | 59 | 15.712 | P | 0.200 | 0.413  |
| SND4 | 2006 | 337 | 20 | 59 | 15.101 | P | 0.200 | -0.260 |
| SNE6 | 2006 | 337 | 20 | 59 | 16.301 | P | 0.200 | 0.361  |
| BEK  | 2006 | 337 | 20 | 59 | 15.759 | P | 0.200 | 0.412  |
| BRIB | 2006 | 337 | 20 | 59 | 15.810 | P | 0.200 | 0.318  |
| SNE5 | 2006 | 337 | 20 | 59 | 16.918 | P | 0.200 | -0.169 |
| BRK  | 2006 | 337 | 20 | 59 | 15.970 | P | 0.200 | 0.123  |
| BKS  | 2006 | 337 | 20 | 59 | 15.989 | P | 0.200 | 0.168  |
| SNE4 | 2006 | 337 | 20 | 59 | 17.031 | P | 0.200 | -0.231 |
| N06A | 2006 | 337 | 20 | 59 | 17.336 | P | 0.200 | 0.212  |
| SNF6 | 2006 | 337 | 20 | 59 | 18.520 | P | 0.200 | 0.217  |
| FARB | 2006 | 337 | 20 | 59 | 18.994 | P | 0.200 | -0.391 |
| CVS  | 2006 | 337 | 20 | 59 | 19.097 | P | 0.200 | -0.112 |
| Q03C | 2006 | 337 | 20 | 59 | 19.122 | P | 0.200 | 1.088  |

|      |      |     |    |    |        |   |       |        |
|------|------|-----|----|----|--------|---|-------|--------|
| O05C | 2006 | 337 | 20 | 59 | 19.363 | P | 0.200 | 0.688  |
| SUTB | 2006 | 337 | 20 | 59 | 19.565 | P | 0.200 | -0.038 |
| SNG5 | 2006 | 337 | 20 | 59 | 21.113 | P | 0.200 | 0.439  |
| ORV  | 2006 | 337 | 20 | 59 | 20.113 | P | 0.200 | 0.530  |
| MCCM | 2006 | 337 | 20 | 59 | 20.604 | P | 0.200 | -0.040 |
| O04C | 2006 | 337 | 20 | 59 | 21.750 | P | 0.200 | 0.322  |
| MNRC | 2006 | 337 | 20 | 59 | 22.084 | P | 0.200 | 0.507  |
| M06C | 2006 | 337 | 20 | 59 | 22.966 | P | 0.200 | 0.199  |
| O03C | 2006 | 337 | 20 | 59 | 25.000 | P | 0.200 | 0.404  |
| HATC | 2006 | 337 | 20 | 59 | 25.889 | P | 0.200 | 0.105  |
| HOPS | 2006 | 337 | 20 | 59 | 26.031 | P | 0.200 | 0.510  |
| M05C | 2006 | 337 | 20 | 59 | 26.813 | P | 0.200 | -0.135 |
| WDC  | 2006 | 337 | 20 | 59 | 27.604 | P | 0.200 | -2.567 |
| GASB | 2006 | 337 | 20 | 59 | 27.661 | P | 0.200 | 0.851  |
| O02C | 2006 | 337 | 20 | 59 | 27.819 | P | 0.200 | -1.787 |
| P01C | 2006 | 337 | 20 | 59 | 29.813 | P | 0.200 | 0.553  |
| M03C | 2006 | 337 | 20 | 59 | 30.506 | P | 0.200 | -0.954 |
| M04C | 2006 | 337 | 20 | 59 | 32.491 | P | 0.200 | -0.125 |
| L04A | 2006 | 337 | 20 | 59 | 34.445 | P | 0.200 | -0.452 |
| YBH  | 2006 | 337 | 20 | 59 | 34.800 | P | 0.200 | -1.932 |
| N02C | 2006 | 337 | 20 | 59 | 35.054 | P | 0.200 | -0.327 |
| O01C | 2006 | 337 | 20 | 59 | 35.391 | P | 0.200 | 0.500  |
| JCC  | 2006 | 337 | 20 | 59 | 39.272 | P | 0.200 | 0.200  |
| HUMO | 2006 | 337 | 20 | 59 | 40.454 | P | 0.200 | -1.734 |
| L02A | 2006 | 337 | 20 | 59 | 42.195 | P | 0.200 | -1.000 |
| M01C | 2006 | 337 | 20 | 59 | 44.352 | P | 0.200 | 0.022  |
| J03A | 2006 | 337 | 20 | 59 | 44.765 | P | 0.200 | -1.172 |
| DBO  | 2006 | 337 | 20 | 59 | 45.445 | P | 0.200 | -0.660 |
| J02A | 2006 | 337 | 20 | 59 | 48.560 | P | 0.200 | -0.254 |
| K01A | 2006 | 337 | 20 | 59 | 51.185 | P | 0.200 | 0.605  |

|      |      |     |    |         |          |           |         |        |        |
|------|------|-----|----|---------|----------|-----------|---------|--------|--------|
| 2006 | 322  | 10  | 5  | 45.6292 | 11.11100 | -87.81000 | 30.1000 | 244    | -0.008 |
| HEC  | 2006 | 322 | 10 | 12      | 36.478   | P         | 0.200   | 0.371  |        |
| TUQ  | 2006 | 322 | 10 | 12      | 36.864   | P         | 0.200   | -0.040 |        |
| BBR  | 2006 | 322 | 10 | 12      | 37.451   | P         | 0.200   | 0.531  |        |
| SVD  | 2006 | 322 | 10 | 12      | 37.650   | P         | 0.200   | 0.616  |        |
| SDD  | 2006 | 322 | 10 | 12      | 37.876   | P         | 0.200   | 0.029  |        |
| VTV  | 2006 | 322 | 10 | 12      | 40.583   | P         | 0.200   | -0.080 |        |
| RRX  | 2006 | 322 | 10 | 12      | 40.619   | P         | 0.200   | 0.449  |        |
| BFS  | 2006 | 322 | 10 | 12      | 40.945   | P         | 0.200   | -0.210 |        |
| SHO  | 2006 | 322 | 10 | 12      | 41.158   | P         | 0.200   | 0.086  |        |
| GSC  | 2006 | 322 | 10 | 12      | 41.473   | P         | 0.200   | 0.263  |        |
| CIA  | 2006 | 322 | 10 | 12      | 41.513   | P         | 0.200   | -0.258 |        |
| FMP  | 2006 | 322 | 10 | 12      | 42.277   | P         | 0.200   | -0.106 |        |
| RPV  | 2006 | 322 | 10 | 12      | 43.133   | P         | 0.200   | -0.044 |        |
| MWC  | 2006 | 322 | 10 | 12      | 43.398   | P         | 0.200   | -0.047 |        |
| CHF  | 2006 | 322 | 10 | 12      | 43.863   | P         | 0.200   | 0.116  |        |
| U10A | 2006 | 322 | 10 | 12      | 44.736   | P         | 0.200   | 0.621  |        |
| DEC  | 2006 | 322 | 10 | 12      | 45.076   | P         | 0.200   | -0.030 |        |
| VCS  | 2006 | 322 | 10 | 12      | 45.105   | P         | 0.200   | 0.194  |        |
| DJJ  | 2006 | 322 | 10 | 12      | 45.378   | P         | 0.200   | 0.211  |        |
| EDW2 | 2006 | 322 | 10 | 12      | 45.837   | P         | 0.200   | -0.229 |        |
| SLA  | 2006 | 322 | 10 | 12      | 46.848   | P         | 0.200   | 0.023  |        |
| LRL  | 2006 | 322 | 10 | 12      | 47.295   | P         | 0.200   | 0.163  |        |
| FUR  | 2006 | 322 | 10 | 12      | 47.556   | P         | 0.200   | 0.352  |        |
| TOV  | 2006 | 322 | 10 | 12      | 47.593   | P         | 0.200   | 0.056  |        |
| MPM  | 2006 | 322 | 10 | 12      | 48.830   | P         | 0.200   | -0.083 |        |
| OSI  | 2006 | 322 | 10 | 12      | 48.838   | P         | 0.200   | -0.251 |        |
| LGU  | 2006 | 322 | 10 | 12      | 48.854   | P         | 0.200   | 0.033  |        |
| ISA  | 2006 | 322 | 10 | 12      | 52.852   | P         | 0.200   | 0.312  |        |
| GRA  | 2006 | 322 | 10 | 12      | 53.342   | P         | 0.200   | 0.582  |        |
| Q11A | 2006 | 322 | 10 | 12      | 53.944   | P         | 0.200   | 0.406  |        |
| CWC  | 2006 | 322 | 10 | 12      | 54.309   | P         | 0.200   | 0.255  |        |

|      |      |     |    |    |        |   |       |        |
|------|------|-----|----|----|--------|---|-------|--------|
| R10A | 2006 | 322 | 10 | 12 | 54.650 | P | 0.200 | 0.790  |
| S09A | 2006 | 322 | 10 | 12 | 55.752 | P | 0.200 | -0.001 |
| MPP  | 2006 | 322 | 10 | 12 | 56.816 | P | 0.200 | -0.113 |
| VES  | 2006 | 322 | 10 | 12 | 56.983 | P | 0.200 | 0.287  |
| TPH  | 2006 | 322 | 10 | 12 | 57.706 | P | 0.200 | 0.129  |
| R09A | 2006 | 322 | 10 | 12 | 57.927 | P | 0.200 | 0.262  |
| TIN  | 2006 | 322 | 10 | 12 | 58.398 | P | 0.200 | 0.616  |
| RCT  | 2006 | 322 | 10 | 12 | 59.801 | P | 0.200 | 0.027  |
| SMM  | 2006 | 322 | 10 | 12 | 59.970 | P | 0.200 | 0.234  |
| S08C | 2006 | 322 | 10 | 13 | 0.529  | P | 0.200 | 0.564  |
| HELL | 2006 | 322 | 10 | 13 | 0.825  | P | 0.200 | 0.419  |
| Q09A | 2006 | 322 | 10 | 13 | 1.814  | P | 0.200 | 0.465  |
| V05C | 2006 | 322 | 10 | 13 | 2.000  | P | 0.200 | 0.383  |
| P10A | 2006 | 322 | 10 | 13 | 2.224  | P | 0.200 | 0.346  |
| PHL  | 2006 | 322 | 10 | 13 | 3.201  | P | 0.200 | -0.147 |
| R08A | 2006 | 322 | 10 | 13 | 4.153  | P | 0.200 | 0.506  |
| U05C | 2006 | 322 | 10 | 13 | 4.516  | P | 0.200 | -0.432 |
| MLAC | 2006 | 322 | 10 | 13 | 4.521  | P | 0.200 | 0.458  |
| T06C | 2006 | 322 | 10 | 13 | 4.637  | P | 0.200 | -1.038 |
| P09A | 2006 | 322 | 10 | 13 | 5.108  | P | 0.200 | 0.220  |
| SN43 | 2006 | 322 | 10 | 13 | 6.410  | P | 0.200 | -0.214 |
| Q08A | 2006 | 322 | 10 | 13 | 5.556  | P | 0.200 | 0.296  |
| PKD  | 2006 | 322 | 10 | 13 | 5.635  | P | 0.200 | -0.003 |
| RAMR | 2006 | 322 | 10 | 13 | 6.288  | P | 0.200 | 0.030  |
| R07C | 2006 | 322 | 10 | 13 | 7.997  | P | 0.200 | 0.602  |
| U04C | 2006 | 322 | 10 | 13 | 8.615  | P | 0.200 | -0.297 |
| O09A | 2006 | 322 | 10 | 13 | 8.769  | P | 0.200 | 0.331  |
| S05C | 2006 | 322 | 10 | 13 | 10.254 | P | 0.200 | -0.421 |
| T05C | 2006 | 322 | 10 | 13 | 10.273 | P | 0.200 | -0.305 |
| Q07A | 2006 | 322 | 10 | 13 | 10.589 | P | 0.200 | 0.324  |
| P08A | 2006 | 322 | 10 | 13 | 10.625 | P | 0.200 | 0.334  |
| S06C | 2006 | 322 | 10 | 13 | 10.821 | P | 0.200 | 0.092  |
| R06C | 2006 | 322 | 10 | 13 | 12.263 | P | 0.200 | 0.578  |
| HAST | 2006 | 322 | 10 | 13 | 13.030 | P | 0.200 | -0.405 |
| SAO  | 2006 | 322 | 10 | 13 | 13.811 | P | 0.200 | -0.637 |
| O08A | 2006 | 322 | 10 | 13 | 13.854 | P | 0.200 | -0.071 |
| P07A | 2006 | 322 | 10 | 13 | 13.934 | P | 0.200 | 0.329  |
| CMB  | 2006 | 322 | 10 | 13 | 13.956 | P | 0.200 | -0.301 |
| PACP | 2006 | 322 | 10 | 13 | 14.376 | P | 0.200 | -0.257 |
| SN97 | 2006 | 322 | 10 | 13 | 15.678 | P | 0.200 | 0.686  |
| SNA8 | 2006 | 322 | 10 | 13 | 15.707 | P | 0.200 | 0.425  |
| SN96 | 2006 | 322 | 10 | 13 | 15.230 | P | 0.200 | 0.552  |
| N08A | 2006 | 322 | 10 | 13 | 15.727 | P | 0.200 | -0.552 |
| SN93 | 2006 | 322 | 10 | 13 | 15.888 | P | 0.200 | -0.040 |
| SNA7 | 2006 | 322 | 10 | 13 | 17.059 | P | 0.200 | 0.613  |
| SNA4 | 2006 | 322 | 10 | 13 | 17.441 | P | 0.200 | 0.173  |
| O07A | 2006 | 322 | 10 | 13 | 16.477 | P | 0.200 | -0.216 |
| R05C | 2006 | 322 | 10 | 13 | 16.543 | P | 0.200 | 0.545  |
| SNA3 | 2006 | 322 | 10 | 13 | 17.869 | P | 0.200 | 0.275  |
| S04C | 2006 | 322 | 10 | 13 | 17.058 | P | 0.200 | 0.148  |
| WCN  | 2006 | 322 | 10 | 13 | 17.563 | P | 0.200 | 0.498  |
| SNB7 | 2006 | 322 | 10 | 13 | 18.632 | P | 0.200 | 0.625  |
| SNB5 | 2006 | 322 | 10 | 13 | 19.257 | P | 0.200 | 0.331  |
| MHC  | 2006 | 322 | 10 | 13 | 18.489 | P | 0.200 | 0.330  |
| R04C | 2006 | 322 | 10 | 13 | 18.817 | P | 0.200 | 0.643  |
| SNB3 | 2006 | 322 | 10 | 13 | 20.066 | P | 0.200 | 0.186  |
| LAVA | 2006 | 322 | 10 | 13 | 19.670 | P | 0.200 | 0.157  |
| N07B | 2006 | 322 | 10 | 13 | 19.708 | P | 0.200 | -0.647 |
| SNC7 | 2006 | 322 | 10 | 13 | 20.763 | P | 0.200 | 0.283  |
| SNC4 | 2006 | 322 | 10 | 13 | 20.875 | P | 0.200 | -0.102 |
| SNC5 | 2006 | 322 | 10 | 13 | 20.921 | P | 0.200 | -0.008 |
| P06A | 2006 | 322 | 10 | 13 | 19.989 | P | 0.200 | 0.426  |
| WENL | 2006 | 322 | 10 | 13 | 20.359 | P | 0.200 | 0.530  |

|      |      |     |    |    |        |   |       |        |
|------|------|-----|----|----|--------|---|-------|--------|
| SND8 | 2006 | 322 | 10 | 13 | 21.480 | P | 0.200 | 0.349  |
| SND5 | 2006 | 322 | 10 | 13 | 22.290 | P | 0.200 | -0.266 |
| SNE9 | 2006 | 322 | 10 | 13 | 21.362 | P | 0.200 | -1.455 |
| O06A | 2006 | 322 | 10 | 13 | 21.573 | P | 0.200 | 0.048  |
| P05C | 2006 | 322 | 10 | 13 | 21.904 | P | 0.200 | 0.414  |
| SND7 | 2006 | 322 | 10 | 13 | 23.073 | P | 0.200 | 0.184  |
| SNC3 | 2006 | 322 | 10 | 13 | 22.265 | P | 0.200 | 0.624  |
| BDM  | 2006 | 322 | 10 | 13 | 22.522 | P | 0.200 | 0.570  |
| SND4 | 2006 | 322 | 10 | 13 | 22.669 | P | 0.200 | -0.386 |
| SNE6 | 2006 | 322 | 10 | 13 | 23.779 | P | 0.200 | 0.229  |
| BEK  | 2006 | 322 | 10 | 13 | 23.017 | P | 0.200 | 0.143  |
| M07A | 2006 | 322 | 10 | 13 | 23.362 | P | 0.200 | -1.106 |
| SNE5 | 2006 | 322 | 10 | 13 | 24.441 | P | 0.200 | -0.246 |
| SNE4 | 2006 | 322 | 10 | 13 | 24.576 | P | 0.200 | -0.310 |
| BRIB | 2006 | 322 | 10 | 13 | 23.644 | P | 0.200 | 0.288  |
| Q04C | 2006 | 322 | 10 | 13 | 23.706 | P | 0.200 | 0.477  |
| SNE7 | 2006 | 322 | 10 | 13 | 24.793 | P | 0.200 | 0.335  |
| BRK  | 2006 | 322 | 10 | 13 | 23.999 | P | 0.200 | 0.302  |
| N06A | 2006 | 322 | 10 | 13 | 24.110 | P | 0.200 | -0.313 |
| SNF6 | 2006 | 322 | 10 | 13 | 25.766 | P | 0.200 | -0.068 |
| O05C | 2006 | 322 | 10 | 13 | 26.545 | P | 0.200 | 0.418  |
| Q03C | 2006 | 322 | 10 | 13 | 26.599 | P | 0.200 | 0.861  |
| CVS  | 2006 | 322 | 10 | 13 | 26.689 | P | 0.200 | -0.237 |
| SUTB | 2006 | 322 | 10 | 13 | 27.014 | P | 0.200 | -0.166 |
| SNG5 | 2006 | 322 | 10 | 13 | 28.356 | P | 0.200 | 0.209  |
| ORV  | 2006 | 322 | 10 | 13 | 27.555 | P | 0.200 | 0.464  |
| L07A | 2006 | 322 | 10 | 13 | 28.071 | P | 0.200 | -0.450 |
| O04C | 2006 | 322 | 10 | 13 | 28.760 | P | 0.200 | -0.001 |
| M06C | 2006 | 322 | 10 | 13 | 29.400 | P | 0.200 | -0.478 |
| MNRC | 2006 | 322 | 10 | 13 | 29.446 | P | 0.200 | 0.291  |
| HATC | 2006 | 322 | 10 | 13 | 32.617 | P | 0.200 | -0.330 |
| M05C | 2006 | 322 | 10 | 13 | 33.198 | P | 0.200 | -0.767 |
| WDC  | 2006 | 322 | 10 | 13 | 34.397 | P | 0.200 | -2.899 |
| GASB | 2006 | 322 | 10 | 13 | 34.489 | P | 0.200 | 0.325  |
| L05A | 2006 | 322 | 10 | 13 | 35.141 | P | 0.200 | -0.738 |
| P01C | 2006 | 322 | 10 | 13 | 37.212 | P | 0.200 | 0.619  |
| M03C | 2006 | 322 | 10 | 13 | 37.235 | P | 0.200 | -1.185 |
| M04C | 2006 | 322 | 10 | 13 | 38.688 | P | 0.200 | -0.751 |
| L04A | 2006 | 322 | 10 | 13 | 40.512 | P | 0.200 | -1.090 |
| M02C | 2006 | 322 | 10 | 13 | 40.636 | P | 0.200 | -2.044 |
| YBH  | 2006 | 322 | 10 | 13 | 41.386 | P | 0.200 | -2.124 |
| K04A | 2006 | 322 | 10 | 13 | 41.851 | P | 0.200 | -1.076 |
| O01C | 2006 | 322 | 10 | 13 | 42.206 | P | 0.200 | 0.208  |
| J05A | 2006 | 322 | 10 | 13 | 43.564 | P | 0.200 | -0.326 |
| JCC  | 2006 | 322 | 10 | 13 | 45.731 | P | 0.200 | -0.242 |
| J04A | 2006 | 322 | 10 | 13 | 46.822 | P | 0.200 | -0.910 |
| I04A | 2006 | 322 | 10 | 13 | 50.095 | P | 0.200 | -1.521 |

|      |      |     |    |         |           |           |          |        |       |
|------|------|-----|----|---------|-----------|-----------|----------|--------|-------|
| 2007 | 232  | 21  | 1  | 29.3361 | -19.71500 | -66.45100 | 221.9000 | 351    | 0.011 |
| SVD  | 2007 | 232 | 21 | 12      | 29.516    | P         | 0.200    | 0.311  |       |
| HEC  | 2007 | 232 | 21 | 12      | 29.565    | P         | 0.200    | 0.317  |       |
| V11A | 2007 | 232 | 21 | 12      | 30.031    | P         | 0.200    | 0.234  |       |
| TUQ  | 2007 | 232 | 21 | 12      | 30.225    | P         | 0.200    | 0.156  |       |
| BFS  | 2007 | 232 | 21 | 12      | 31.914    | P         | 0.200    | -0.080 |       |
| RRX  | 2007 | 232 | 21 | 12      | 32.172    | P         | 0.200    | 0.314  |       |
| U11A | 2007 | 232 | 21 | 12      | 32.465    | P         | 0.200    | 0.440  |       |
| GSC  | 2007 | 232 | 21 | 12      | 33.053    | P         | 0.200    | 0.222  |       |
| SHO  | 2007 | 232 | 21 | 12      | 33.089    | P         | 0.200    | 0.140  |       |
| MWC  | 2007 | 232 | 21 | 12      | 33.452    | P         | 0.200    | 0.058  |       |
| CHF  | 2007 | 232 | 21 | 12      | 33.690    | P         | 0.200    | 0.055  |       |
| VCS  | 2007 | 232 | 21 | 12      | 34.293    | P         | 0.200    | -0.313 |       |
| DJJ  | 2007 | 232 | 21 | 12      | 34.404    | P         | 0.200    | -0.007 |       |
| DEC  | 2007 | 232 | 21 | 12      | 34.445    | P         | 0.200    | 0.030  |       |

|      |      |     |    |    |        |   |       |        |
|------|------|-----|----|----|--------|---|-------|--------|
| EDW2 | 2007 | 232 | 21 | 12 | 35.114 | P | 0.200 | -0.438 |
| T11A | 2007 | 232 | 21 | 12 | 35.115 | P | 0.200 | 0.420  |
| U10A | 2007 | 232 | 21 | 12 | 35.837 | P | 0.200 | 0.513  |
| LGU  | 2007 | 232 | 21 | 12 | 36.358 | P | 0.200 | -0.273 |
| SLA  | 2007 | 232 | 21 | 12 | 36.618 | P | 0.200 | -0.089 |
| LRL  | 2007 | 232 | 21 | 12 | 36.710 | P | 0.200 | 0.072  |
| TPNV | 2007 | 232 | 21 | 12 | 37.694 | P | 0.200 | 0.662  |
| FUR  | 2007 | 232 | 21 | 12 | 37.704 | P | 0.200 | 0.504  |
| MPM  | 2007 | 232 | 21 | 12 | 37.984 | P | 0.200 | -0.259 |
| SCZ2 | 2007 | 232 | 21 | 12 | 38.145 | P | 0.200 | -0.216 |
| S11A | 2007 | 232 | 21 | 12 | 38.850 | P | 0.200 | 0.865  |
| ARV  | 2007 | 232 | 21 | 12 | 39.647 | P | 0.200 | 0.290  |
| ISA  | 2007 | 232 | 21 | 12 | 40.412 | P | 0.200 | 0.177  |
| R11A | 2007 | 232 | 21 | 12 | 40.789 | P | 0.200 | 0.513  |
| GRA  | 2007 | 232 | 21 | 12 | 41.522 | P | 0.200 | 0.393  |
| CWC  | 2007 | 232 | 21 | 12 | 41.966 | P | 0.200 | 0.259  |
| S10A | 2007 | 232 | 21 | 12 | 42.313 | P | 0.200 | 0.337  |
| MPP  | 2007 | 232 | 21 | 12 | 42.511 | P | 0.200 | 0.118  |
| Q11A | 2007 | 232 | 21 | 12 | 42.644 | P | 0.200 | 0.375  |
| VES  | 2007 | 232 | 21 | 12 | 42.921 | P | 0.200 | -0.054 |
| R10A | 2007 | 232 | 21 | 12 | 43.216 | P | 0.200 | 0.876  |
| S09A | 2007 | 232 | 21 | 12 | 43.515 | P | 0.200 | 0.153  |
| RCT  | 2007 | 232 | 21 | 12 | 44.270 | P | 0.200 | -0.969 |
| SMM  | 2007 | 232 | 21 | 12 | 44.748 | P | 0.200 | 0.280  |
| TIN  | 2007 | 232 | 21 | 12 | 44.760 | P | 0.200 | 0.401  |
| TPH  | 2007 | 232 | 21 | 12 | 44.924 | P | 0.200 | 0.224  |
| R09A | 2007 | 232 | 21 | 12 | 44.931 | P | 0.200 | 0.081  |
| Q10A | 2007 | 232 | 21 | 12 | 45.339 | P | 0.200 | 0.601  |
| HELL | 2007 | 232 | 21 | 12 | 45.537 | P | 0.200 | -0.279 |
| V05C | 2007 | 232 | 21 | 12 | 46.221 | P | 0.200 | 0.080  |
| S08C | 2007 | 232 | 21 | 12 | 46.242 | P | 0.200 | 0.162  |
| PHL  | 2007 | 232 | 21 | 12 | 46.841 | P | 0.200 | -0.059 |
| Q09A | 2007 | 232 | 21 | 12 | 47.728 | P | 0.200 | 0.288  |
| T06C | 2007 | 232 | 21 | 12 | 48.129 | P | 0.200 | -1.191 |
| PKD  | 2007 | 232 | 21 | 12 | 48.407 | P | 0.200 | -0.307 |
| P10A | 2007 | 232 | 21 | 12 | 48.620 | P | 0.200 | 0.658  |
| R08A | 2007 | 232 | 21 | 12 | 48.891 | P | 0.200 | 0.056  |
| V04C | 2007 | 232 | 21 | 12 | 48.970 | P | 0.200 | 0.066  |
| Q08A | 2007 | 232 | 21 | 12 | 49.731 | P | 0.200 | -0.206 |
| P09A | 2007 | 232 | 21 | 12 | 49.919 | P | 0.200 | -0.084 |
| U04C | 2007 | 232 | 21 | 12 | 51.078 | P | 0.200 | 0.148  |
| R07C | 2007 | 232 | 21 | 12 | 51.499 | P | 0.200 | 0.444  |
| SN55 | 2007 | 232 | 21 | 12 | 51.579 | P | 0.200 | 0.056  |
| YO10 | 2007 | 232 | 21 | 12 | 51.811 | P | 0.200 | 0.021  |
| YO11 | 2007 | 232 | 21 | 12 | 51.826 | P | 0.200 | 0.040  |
| YO09 | 2007 | 232 | 21 | 12 | 51.829 | P | 0.200 | -0.017 |
| YO08 | 2007 | 232 | 21 | 12 | 51.953 | P | 0.200 | 0.031  |
| YO07 | 2007 | 232 | 21 | 12 | 52.097 | P | 0.200 | -0.078 |
| SN63 | 2007 | 232 | 21 | 12 | 52.307 | P | 0.200 | -0.165 |
| YO01 | 2007 | 232 | 21 | 12 | 52.326 | P | 0.200 | -0.149 |
| YO02 | 2007 | 232 | 21 | 12 | 52.367 | P | 0.200 | -0.254 |
| O09A | 2007 | 232 | 21 | 12 | 52.384 | P | 0.200 | 0.001  |
| YO03 | 2007 | 232 | 21 | 12 | 52.385 | P | 0.200 | -0.180 |
| YO06 | 2007 | 232 | 21 | 12 | 52.397 | P | 0.200 | 0.033  |
| YO04 | 2007 | 232 | 21 | 12 | 52.518 | P | 0.200 | 0.047  |
| SN64 | 2007 | 232 | 21 | 12 | 52.610 | P | 0.200 | 0.150  |
| YO05 | 2007 | 232 | 21 | 12 | 52.614 | P | 0.200 | 0.120  |
| S06C | 2007 | 232 | 21 | 12 | 53.064 | P | 0.200 | -0.051 |
| Q07A | 2007 | 232 | 21 | 12 | 53.644 | P | 0.200 | 0.415  |
| HAST | 2007 | 232 | 21 | 12 | 53.719 | P | 0.200 | -0.144 |
| P08A | 2007 | 232 | 21 | 12 | 53.726 | P | 0.200 | 0.223  |
| SAO  | 2007 | 232 | 21 | 12 | 54.477 | P | 0.200 | -0.267 |
| R06C | 2007 | 232 | 21 | 12 | 54.623 | P | 0.200 | 0.584  |

|      |      |     |    |    |        |   |       |        |
|------|------|-----|----|----|--------|---|-------|--------|
| CMB  | 2007 | 232 | 21 | 12 | 55.049 | P | 0.200 | -0.406 |
| PACP | 2007 | 232 | 21 | 12 | 55.193 | P | 0.200 | 0.188  |
| O08A | 2007 | 232 | 21 | 12 | 55.588 | P | 0.200 | -0.466 |
| SN86 | 2007 | 232 | 21 | 12 | 55.724 | P | 0.200 | 0.428  |
| P07A | 2007 | 232 | 21 | 12 | 56.026 | P | 0.200 | 0.466  |
| SN87 | 2007 | 232 | 21 | 12 | 56.029 | P | 0.200 | 0.644  |
| SN96 | 2007 | 232 | 21 | 12 | 56.161 | P | 0.200 | 0.241  |
| SN93 | 2007 | 232 | 21 | 12 | 56.457 | P | 0.200 | 0.033  |
| S04C | 2007 | 232 | 21 | 12 | 56.683 | P | 0.200 | -0.003 |
| N08A | 2007 | 232 | 21 | 12 | 56.750 | P | 0.200 | -0.924 |
| SN97 | 2007 | 232 | 21 | 12 | 56.834 | P | 0.200 | 0.545  |
| R05C | 2007 | 232 | 21 | 12 | 57.171 | P | 0.200 | 0.197  |
| SNA4 | 2007 | 232 | 21 | 12 | 57.478 | P | 0.200 | -0.109 |
| O07A | 2007 | 232 | 21 | 12 | 57.510 | P | 0.200 | -0.274 |
| SNA5 | 2007 | 232 | 21 | 12 | 57.555 | P | 0.200 | 0.195  |
| MHC  | 2007 | 232 | 21 | 12 | 57.678 | P | 0.200 | 0.196  |
| SNA3 | 2007 | 232 | 21 | 12 | 57.758 | P | 0.200 | 0.031  |
| SNB9 | 2007 | 232 | 21 | 12 | 57.957 | P | 0.200 | 0.382  |
| WCN  | 2007 | 232 | 21 | 12 | 58.251 | P | 0.200 | 0.425  |
| R04C | 2007 | 232 | 21 | 12 | 58.303 | P | 0.200 | 0.417  |
| BNLO | 2007 | 232 | 21 | 12 | 58.381 | P | 0.200 | -0.313 |
| SNB5 | 2007 | 232 | 21 | 12 | 58.712 | P | 0.200 | -0.124 |
| LAVA | 2007 | 232 | 21 | 12 | 58.796 | P | 0.200 | -0.292 |
| WENL | 2007 | 232 | 21 | 12 | 59.025 | P | 0.200 | 0.454  |
| SNB3 | 2007 | 232 | 21 | 12 | 59.085 | P | 0.200 | -0.125 |
| JRSC | 2007 | 232 | 21 | 12 | 59.472 | P | 0.200 | -0.082 |
| SNC4 | 2007 | 232 | 21 | 12 | 59.676 | P | 0.200 | -0.280 |
| SNC5 | 2007 | 232 | 21 | 12 | 59.779 | P | 0.200 | -0.347 |
| P06A | 2007 | 232 | 21 | 12 | 59.791 | P | 0.200 | 0.195  |
| N07B | 2007 | 232 | 21 | 13 | 0.015  | P | 0.200 | -0.289 |
| SNC7 | 2007 | 232 | 21 | 13 | 0.297  | P | 0.200 | 0.220  |
| SNC3 | 2007 | 232 | 21 | 13 | 0.511  | P | 0.200 | 0.069  |
| BDM  | 2007 | 232 | 21 | 13 | 0.667  | P | 0.200 | 0.474  |
| SND5 | 2007 | 232 | 21 | 13 | 0.695  | P | 0.200 | -0.452 |
| SND8 | 2007 | 232 | 21 | 13 | 0.818  | P | 0.200 | 0.247  |
| SND9 | 2007 | 232 | 21 | 13 | 0.821  | P | 0.200 | 0.388  |
| SND4 | 2007 | 232 | 21 | 13 | 0.910  | P | 0.200 | -0.491 |
| P05C | 2007 | 232 | 21 | 13 | 0.938  | P | 0.200 | 0.364  |
| O06A | 2007 | 232 | 21 | 13 | 1.009  | P | 0.200 | 0.129  |
| BKS  | 2007 | 232 | 21 | 13 | 1.136  | P | 0.200 | -0.100 |
| BRK  | 2007 | 232 | 21 | 13 | 1.165  | P | 0.200 | 0.012  |
| BRIB | 2007 | 232 | 21 | 13 | 1.188  | P | 0.200 | 0.112  |
| SND7 | 2007 | 232 | 21 | 13 | 1.791  | P | 0.200 | 0.144  |
| SNE9 | 2007 | 232 | 21 | 13 | 1.846  | P | 0.200 | 0.091  |
| SNE6 | 2007 | 232 | 21 | 13 | 2.082  | P | 0.200 | 0.095  |
| SNE4 | 2007 | 232 | 21 | 13 | 2.377  | P | 0.200 | -0.357 |
| SNE5 | 2007 | 232 | 21 | 13 | 2.462  | P | 0.200 | -0.160 |
| FARB | 2007 | 232 | 21 | 13 | 2.852  | P | 0.200 | -0.453 |
| SNF9 | 2007 | 232 | 21 | 13 | 2.919  | P | 0.200 | -0.020 |
| SNE7 | 2007 | 232 | 21 | 13 | 2.961  | P | 0.200 | 0.166  |
| N06A | 2007 | 232 | 21 | 13 | 2.967  | P | 0.200 | 0.073  |
| M07A | 2007 | 232 | 21 | 13 | 3.003  | P | 0.200 | -0.090 |
| SNF6 | 2007 | 232 | 21 | 13 | 3.138  | P | 0.200 | -0.439 |
| CVS  | 2007 | 232 | 21 | 13 | 3.158  | P | 0.200 | -0.362 |
| SNF8 | 2007 | 232 | 21 | 13 | 3.482  | P | 0.200 | 0.226  |
| Q03C | 2007 | 232 | 21 | 13 | 3.601  | P | 0.200 | 0.644  |
| SUTB | 2007 | 232 | 21 | 13 | 3.721  | P | 0.200 | -0.428 |
| O05C | 2007 | 232 | 21 | 13 | 3.869  | P | 0.200 | 0.124  |
| MCCM | 2007 | 232 | 21 | 13 | 3.995  | P | 0.200 | -0.221 |
| ORV  | 2007 | 232 | 21 | 13 | 4.461  | P | 0.200 | 0.318  |
| SNG5 | 2007 | 232 | 21 | 13 | 4.652  | P | 0.200 | -0.391 |
| SNG7 | 2007 | 232 | 21 | 13 | 4.953  | P | 0.200 | -0.176 |
| MNRC | 2007 | 232 | 21 | 13 | 5.264  | P | 0.200 | 0.086  |



|      |      |     |    |    |        |   |       |        |
|------|------|-----|----|----|--------|---|-------|--------|
| O04C | 2007 | 232 | 21 | 13 | 5.384  | P | 0.200 | -0.208 |
| ELFS | 2007 | 232 | 21 | 13 | 5.639  | P | 0.200 | 0.097  |
| L07A | 2007 | 232 | 21 | 13 | 6.193  | P | 0.200 | 0.354  |
| O03C | 2007 | 232 | 21 | 13 | 6.242  | P | 0.200 | -1.225 |
| M06C | 2007 | 232 | 21 | 13 | 6.640  | P | 0.200 | 0.108  |
| HATC | 2007 | 232 | 21 | 13 | 8.066  | P | 0.200 | -0.403 |
| M05C | 2007 | 232 | 21 | 13 | 9.082  | P | 0.200 | -0.134 |
| WDC  | 2007 | 232 | 21 | 13 | 9.167  | P | 0.200 | -1.974 |
| GASB | 2007 | 232 | 21 | 13 | 9.172  | P | 0.200 | 0.409  |
| O02C | 2007 | 232 | 21 | 13 | 9.809  | P | 0.200 | -0.818 |
| P01C | 2007 | 232 | 21 | 13 | 10.436 | P | 0.200 | 0.188  |
| L05A | 2007 | 232 | 21 | 13 | 11.021 | P | 0.200 | 0.331  |
| M03C | 2007 | 232 | 21 | 13 | 11.144 | P | 0.200 | -0.948 |
| M04C | 2007 | 232 | 21 | 13 | 12.575 | P | 0.200 | -0.349 |
| K05A | 2007 | 232 | 21 | 13 | 13.538 | P | 0.200 | 0.304  |
| L04A | 2007 | 232 | 21 | 13 | 13.927 | P | 0.200 | -0.437 |
| YBH  | 2007 | 232 | 21 | 13 | 13.943 | P | 0.200 | -1.487 |
| M02C | 2007 | 232 | 21 | 13 | 13.950 | P | 0.200 | -0.887 |
| N02C | 2007 | 232 | 21 | 13 | 14.266 | P | 0.200 | -0.244 |
| O01C | 2007 | 232 | 21 | 13 | 14.316 | P | 0.200 | 0.368  |
| K04A | 2007 | 232 | 21 | 13 | 14.974 | P | 0.200 | -0.352 |
| J05A | 2007 | 232 | 21 | 13 | 16.038 | P | 0.200 | -0.028 |
| JCC  | 2007 | 232 | 21 | 13 | 16.732 | P | 0.200 | 0.073  |
| J04A | 2007 | 232 | 21 | 13 | 18.225 | P | 0.200 | -0.241 |
| L02A | 2007 | 232 | 21 | 13 | 19.381 | P | 0.200 | -0.128 |
| I04A | 2007 | 232 | 21 | 13 | 20.166 | P | 0.200 | -0.763 |
| M01C | 2007 | 232 | 21 | 13 | 20.192 | P | 0.200 | 0.004  |
| K02A | 2007 | 232 | 21 | 13 | 20.856 | P | 0.200 | -0.286 |
| DBO  | 2007 | 232 | 21 | 13 | 21.317 | P | 0.200 | -0.058 |
| J02A | 2007 | 232 | 21 | 13 | 23.141 | P | 0.200 | 0.110  |
| I03A | 2007 | 232 | 21 | 13 | 24.004 | P | 0.200 | -0.104 |
| K01A | 2007 | 232 | 21 | 13 | 24.135 | P | 0.200 | -0.003 |

|      |      |     |    |        |          |           |          |        |        |
|------|------|-----|----|--------|----------|-----------|----------|--------|--------|
| 2007 | 204  | 22  | 30 | 9.0764 | 14.38100 | -90.95400 | 113.0000 | 340    | -0.005 |
| HEC  | 2007 | 204 | 22 | 36     | 12.595   | P         | 0.200    | 0.147  |        |
| TUQ  | 2007 | 204 | 22 | 36     | 13.056   | P         | 0.200    | -0.216 |        |
| BBR  | 2007 | 204 | 22 | 36     | 13.695   | P         | 0.200    | 0.407  |        |
| SVD  | 2007 | 204 | 22 | 36     | 13.709   | P         | 0.200    | 0.292  |        |
| RRX  | 2007 | 204 | 22 | 36     | 16.781   | P         | 0.200    | 0.188  |        |
| VTV  | 2007 | 204 | 22 | 36     | 16.864   | P         | 0.200    | -0.244 |        |
| BFS  | 2007 | 204 | 22 | 36     | 17.301   | P         | 0.200    | -0.322 |        |
| SHO  | 2007 | 204 | 22 | 36     | 17.407   | P         | 0.200    | -0.128 |        |
| ADO  | 2007 | 204 | 22 | 36     | 17.641   | P         | 0.200    | -0.007 |        |
| GSC  | 2007 | 204 | 22 | 36     | 17.708   | P         | 0.200    | 0.052  |        |
| FMP  | 2007 | 204 | 22 | 36     | 18.761   | P         | 0.200    | -0.167 |        |
| RPV  | 2007 | 204 | 22 | 36     | 19.588   | P         | 0.200    | -0.166 |        |
| MWC  | 2007 | 204 | 22 | 36     | 19.820   | P         | 0.200    | -0.168 |        |
| CHF  | 2007 | 204 | 22 | 36     | 20.187   | P         | 0.200    | -0.107 |        |
| PASC | 2007 | 204 | 22 | 36     | 20.203   | P         | 0.200    | -0.225 |        |
| U10A | 2007 | 204 | 22 | 36     | 21.072   | P         | 0.200    | 0.410  |        |
| VCS  | 2007 | 204 | 22 | 36     | 21.355   | P         | 0.200    | -0.118 |        |
| DEC  | 2007 | 204 | 22 | 36     | 21.596   | P         | 0.200    | -0.100 |        |
| DJJ  | 2007 | 204 | 22 | 36     | 21.811   | P         | 0.200    | 0.048  |        |
| EDW2 | 2007 | 204 | 22 | 36     | 22.151   | P         | 0.200    | -0.499 |        |
| SLA  | 2007 | 204 | 22 | 36     | 23.223   | P         | 0.200    | -0.198 |        |
| LRL  | 2007 | 204 | 22 | 36     | 23.673   | P         | 0.200    | -0.062 |        |
| TPNV | 2007 | 204 | 22 | 36     | 23.781   | P         | 0.200    | 0.650  |        |
| FUR  | 2007 | 204 | 22 | 36     | 24.061   | P         | 0.200    | 0.228  |        |
| S11A | 2007 | 204 | 22 | 36     | 24.964   | P         | 0.200    | 0.727  |        |
| MPM  | 2007 | 204 | 22 | 36     | 25.254   | P         | 0.200    | -0.305 |        |
| OSI  | 2007 | 204 | 22 | 36     | 25.400   | P         | 0.200    | -0.375 |        |
| LGU  | 2007 | 204 | 22 | 36     | 25.646   | P         | 0.200    | 0.103  |        |
| R11A | 2007 | 204 | 22 | 36     | 27.861   | P         | 0.200    | 0.434  |        |

|      |      |     |    |    |        |   |       |        |
|------|------|-----|----|----|--------|---|-------|--------|
| SCZ2 | 2007 | 204 | 22 | 36 | 28.290 | P | 0.200 | -0.336 |
| ARV  | 2007 | 204 | 22 | 36 | 28.733 | P | 0.200 | 0.027  |
| ISA  | 2007 | 204 | 22 | 36 | 29.420 | P | 0.200 | 0.148  |
| GRA  | 2007 | 204 | 22 | 36 | 29.994 | P | 0.200 | 0.468  |
| S10A | 2007 | 204 | 22 | 36 | 30.763 | P | 0.200 | 0.452  |
| CWC  | 2007 | 204 | 22 | 36 | 30.867 | P | 0.200 | 0.045  |
| Q11A | 2007 | 204 | 22 | 36 | 30.915 | P | 0.200 | 0.393  |
| SBC  | 2007 | 204 | 22 | 36 | 30.993 | P | 0.200 | -0.004 |
| R10A | 2007 | 204 | 22 | 36 | 31.542 | P | 0.200 | 0.778  |
| S09A | 2007 | 204 | 22 | 36 | 32.518 | P | 0.200 | -0.113 |
| MPP  | 2007 | 204 | 22 | 36 | 33.691 | P | 0.200 | -0.133 |
| VES  | 2007 | 204 | 22 | 36 | 33.767 | P | 0.200 | 0.232  |
| TPH  | 2007 | 204 | 22 | 36 | 34.589 | P | 0.200 | 0.066  |
| R09A | 2007 | 204 | 22 | 36 | 34.828 | P | 0.200 | 0.201  |
| TIN  | 2007 | 204 | 22 | 36 | 35.118 | P | 0.200 | 0.454  |
| Q10A | 2007 | 204 | 22 | 36 | 35.155 | P | 0.200 | 0.831  |
| RCT  | 2007 | 204 | 22 | 36 | 36.663 | P | 0.200 | -0.031 |
| SMM  | 2007 | 204 | 22 | 36 | 36.909 | P | 0.200 | 0.219  |
| S08C | 2007 | 204 | 22 | 36 | 37.365 | P | 0.200 | 0.451  |
| HELL | 2007 | 204 | 22 | 36 | 37.601 | P | 0.200 | 0.254  |
| Q09A | 2007 | 204 | 22 | 36 | 38.953 | P | 0.200 | 0.505  |
| V05C | 2007 | 204 | 22 | 36 | 39.022 | P | 0.200 | 0.425  |
| P10A | 2007 | 204 | 22 | 36 | 39.537 | P | 0.200 | 0.436  |
| PHL  | 2007 | 204 | 22 | 36 | 40.347 | P | 0.200 | -0.051 |
| R08A | 2007 | 204 | 22 | 36 | 41.285 | P | 0.200 | 0.552  |
| MLAC | 2007 | 204 | 22 | 36 | 41.514 | P | 0.200 | 0.397  |
| U05C | 2007 | 204 | 22 | 36 | 41.674 | P | 0.200 | -0.346 |
| T06C | 2007 | 204 | 22 | 36 | 41.712 | P | 0.200 | -1.046 |
| P09A | 2007 | 204 | 22 | 36 | 42.356 | P | 0.200 | 0.209  |
| PKD  | 2007 | 204 | 22 | 36 | 42.475 | P | 0.200 | -0.258 |
| Q08A | 2007 | 204 | 22 | 36 | 42.774 | P | 0.200 | 0.331  |
| V04C | 2007 | 204 | 22 | 36 | 43.462 | P | 0.200 | 0.077  |
| R07C | 2007 | 204 | 22 | 36 | 45.146 | P | 0.200 | 0.596  |
| SN55 | 2007 | 204 | 22 | 36 | 45.317 | P | 0.200 | 0.067  |
| U04C | 2007 | 204 | 22 | 36 | 45.689 | P | 0.200 | -0.406 |
| YO11 | 2007 | 204 | 22 | 36 | 45.715 | P | 0.200 | 0.103  |
| YO10 | 2007 | 204 | 22 | 36 | 45.740 | P | 0.200 | 0.030  |
| YO09 | 2007 | 204 | 22 | 36 | 45.881 | P | 0.200 | 0.001  |
| YO08 | 2007 | 204 | 22 | 36 | 45.987 | P | 0.200 | -0.070 |
| O09A | 2007 | 204 | 22 | 36 | 46.172 | P | 0.200 | 0.334  |
| YO07 | 2007 | 204 | 22 | 36 | 46.215 | P | 0.200 | -0.079 |
| YO06 | 2007 | 204 | 22 | 36 | 46.590 | P | 0.200 | -0.072 |
| SN64 | 2007 | 204 | 22 | 36 | 46.840 | P | 0.200 | -0.037 |
| YO03 | 2007 | 204 | 22 | 36 | 46.842 | P | 0.200 | -0.126 |
| YO04 | 2007 | 204 | 22 | 36 | 46.921 | P | 0.200 | -0.070 |
| SN63 | 2007 | 204 | 22 | 36 | 46.933 | P | 0.200 | -0.105 |
| YO01 | 2007 | 204 | 22 | 36 | 46.940 | P | 0.200 | -0.074 |
| YO05 | 2007 | 204 | 22 | 36 | 46.948 | P | 0.200 | -0.040 |
| YO02 | 2007 | 204 | 22 | 36 | 47.007 | P | 0.200 | -0.044 |
| S05C | 2007 | 204 | 22 | 36 | 47.271 | P | 0.200 | -0.627 |
| T05C | 2007 | 204 | 22 | 36 | 47.287 | P | 0.200 | -0.515 |
| V03C | 2007 | 204 | 22 | 36 | 47.301 | P | 0.200 | 0.018  |
| BMN  | 2007 | 204 | 22 | 36 | 47.602 | P | 0.200 | 0.196  |
| Q07A | 2007 | 204 | 22 | 36 | 47.918 | P | 0.200 | 0.369  |
| S06C | 2007 | 204 | 22 | 36 | 47.945 | P | 0.200 | -0.013 |
| P08A | 2007 | 204 | 22 | 36 | 48.140 | P | 0.200 | 0.486  |
| R06C | 2007 | 204 | 22 | 36 | 49.592 | P | 0.200 | 0.616  |
| HAST | 2007 | 204 | 22 | 36 | 50.194 | P | 0.200 | -0.572 |
| SAO  | 2007 | 204 | 22 | 36 | 51.144 | P | 0.200 | -0.653 |
| CMB  | 2007 | 204 | 22 | 36 | 51.184 | P | 0.200 | -0.409 |
| P07A | 2007 | 204 | 22 | 36 | 51.397 | P | 0.200 | 0.360  |
| SN86 | 2007 | 204 | 22 | 36 | 51.431 | P | 0.200 | 0.499  |
| O08A | 2007 | 204 | 22 | 36 | 51.466 | P | 0.200 | 0.018  |

|      |      |     |    |    |        |   |       |        |
|------|------|-----|----|----|--------|---|-------|--------|
| SN87 | 2007 | 204 | 22 | 36 | 51.514 | P | 0.200 | 0.689  |
| PACP | 2007 | 204 | 22 | 36 | 51.558 | P | 0.200 | -0.424 |
| SN96 | 2007 | 204 | 22 | 36 | 52.580 | P | 0.200 | 0.532  |
| SN97 | 2007 | 204 | 22 | 36 | 53.006 | P | 0.200 | 0.624  |
| SN93 | 2007 | 204 | 22 | 36 | 53.167 | P | 0.200 | -0.159 |
| N08A | 2007 | 204 | 22 | 36 | 53.758 | P | 0.200 | -0.166 |
| R05C | 2007 | 204 | 22 | 36 | 53.989 | P | 0.200 | 0.584  |
| S04C | 2007 | 204 | 22 | 36 | 54.058 | P | 0.200 | -0.270 |
| O07A | 2007 | 204 | 22 | 36 | 54.177 | P | 0.200 | -0.078 |
| SNB9 | 2007 | 204 | 22 | 36 | 54.450 | P | 0.200 | 0.433  |
| SNA7 | 2007 | 204 | 22 | 36 | 54.586 | P | 0.200 | 0.699  |
| SNA5 | 2007 | 204 | 22 | 36 | 54.702 | P | 0.200 | 0.377  |
| SNA4 | 2007 | 204 | 22 | 36 | 54.866 | P | 0.200 | 0.158  |
| WCN  | 2007 | 204 | 22 | 36 | 55.129 | P | 0.200 | 0.580  |
| SNA3 | 2007 | 204 | 22 | 36 | 55.250 | P | 0.200 | 0.212  |
| MHC  | 2007 | 204 | 22 | 36 | 55.572 | P | 0.200 | -0.036 |
| SNB6 | 2007 | 204 | 22 | 36 | 55.816 | P | 0.200 | 0.560  |
| SNB7 | 2007 | 204 | 22 | 36 | 56.102 | P | 0.200 | 0.606  |
| R04C | 2007 | 204 | 22 | 36 | 56.212 | P | 0.200 | 0.570  |
| SNB5 | 2007 | 204 | 22 | 36 | 56.741 | P | 0.200 | 0.317  |
| LAVA | 2007 | 204 | 22 | 36 | 57.117 | P | 0.200 | 0.086  |
| BNLO | 2007 | 204 | 22 | 36 | 57.456 | P | 0.200 | -0.267 |
| P06A | 2007 | 204 | 22 | 36 | 57.548 | P | 0.200 | 0.411  |
| SNB3 | 2007 | 204 | 22 | 36 | 57.569 | P | 0.200 | 0.173  |
| N07B | 2007 | 204 | 22 | 36 | 57.713 | P | 0.200 | -0.367 |
| SNC6 | 2007 | 204 | 22 | 36 | 57.812 | P | 0.200 | 0.548  |
| WENL | 2007 | 204 | 22 | 36 | 57.897 | P | 0.200 | 0.557  |
| SNC7 | 2007 | 204 | 22 | 36 | 58.463 | P | 0.200 | 0.420  |
| SNC4 | 2007 | 204 | 22 | 36 | 58.469 | P | 0.200 | -0.071 |
| SNC5 | 2007 | 204 | 22 | 36 | 58.568 | P | 0.200 | 0.076  |
| SND9 | 2007 | 204 | 22 | 36 | 59.034 | P | 0.200 | 0.495  |
| SND8 | 2007 | 204 | 22 | 36 | 59.225 | P | 0.200 | 0.481  |
| JRSC | 2007 | 204 | 22 | 36 | 59.289 | P | 0.200 | 0.140  |
| O06A | 2007 | 204 | 22 | 36 | 59.377 | P | 0.200 | 0.181  |
| P05C | 2007 | 204 | 22 | 36 | 59.582 | P | 0.200 | 0.496  |
| SNC3 | 2007 | 204 | 22 | 36 | 59.621 | P | 0.200 | 0.415  |
| SND5 | 2007 | 204 | 22 | 37 | 0.092  | P | 0.200 | -0.082 |
| BDM  | 2007 | 204 | 22 | 37 | 0.172  | P | 0.200 | 0.655  |
| SND4 | 2007 | 204 | 22 | 37 | 0.328  | P | 0.200 | -0.350 |
| BEK  | 2007 | 204 | 22 | 37 | 0.822  | P | 0.200 | 0.274  |
| SNE9 | 2007 | 204 | 22 | 37 | 0.828  | P | 0.200 | 0.331  |
| SND7 | 2007 | 204 | 22 | 37 | 0.908  | P | 0.200 | 0.370  |
| Q04C | 2007 | 204 | 22 | 37 | 1.412  | P | 0.200 | 0.563  |
| BRIB | 2007 | 204 | 22 | 37 | 1.437  | P | 0.200 | 0.476  |
| SNE6 | 2007 | 204 | 22 | 37 | 1.522  | P | 0.200 | 0.318  |
| BRK  | 2007 | 204 | 22 | 37 | 1.556  | P | 0.200 | 0.235  |
| BKS  | 2007 | 204 | 22 | 37 | 1.573  | P | 0.200 | 0.279  |
| M07A | 2007 | 204 | 22 | 37 | 1.585  | P | 0.200 | -0.765 |
| N06A | 2007 | 204 | 22 | 37 | 2.045  | P | 0.200 | -0.175 |
| SNE5 | 2007 | 204 | 22 | 37 | 2.161  | P | 0.200 | -0.204 |
| SNE4 | 2007 | 204 | 22 | 37 | 2.395  | P | 0.200 | -0.169 |
| SNF9 | 2007 | 204 | 22 | 37 | 2.512  | P | 0.200 | 0.204  |
| SNE7 | 2007 | 204 | 22 | 37 | 2.630  | P | 0.200 | 0.481  |
| SNF8 | 2007 | 204 | 22 | 37 | 3.182  | P | 0.200 | 0.327  |
| SNF6 | 2007 | 204 | 22 | 37 | 3.681  | P | 0.200 | 0.129  |
| Q03C | 2007 | 204 | 22 | 37 | 4.422  | P | 0.200 | 1.005  |
| O05C | 2007 | 204 | 22 | 37 | 4.440  | P | 0.200 | 0.556  |
| CVS  | 2007 | 204 | 22 | 37 | 4.592  | P | 0.200 | -0.043 |
| SUTB | 2007 | 204 | 22 | 37 | 4.797  | P | 0.200 | -0.122 |
| ORV  | 2007 | 204 | 22 | 37 | 5.353  | P | 0.200 | 0.498  |
| MCCM | 2007 | 204 | 22 | 37 | 6.084  | P | 0.200 | -0.024 |
| SNG5 | 2007 | 204 | 22 | 37 | 6.238  | P | 0.200 | 0.304  |
| L07A | 2007 | 204 | 22 | 37 | 6.321  | P | 0.200 | -0.265 |

|      |      |     |    |    |        |   |       |        |
|------|------|-----|----|----|--------|---|-------|--------|
| SNG7 | 2007 | 204 | 22 | 37 | 6.410  | P | 0.200 | 0.411  |
| ELFS | 2007 | 204 | 22 | 37 | 6.639  | P | 0.200 | 0.375  |
| O04C | 2007 | 204 | 22 | 37 | 6.750  | P | 0.200 | 0.137  |
| MNRC | 2007 | 204 | 22 | 37 | 7.375  | P | 0.200 | 0.424  |
| M06C | 2007 | 204 | 22 | 37 | 7.609  | P | 0.200 | -0.244 |
| HATC | 2007 | 204 | 22 | 37 | 10.907 | P | 0.200 | -0.045 |
| M05C | 2007 | 204 | 22 | 37 | 11.568 | P | 0.200 | -0.484 |
| GASB | 2007 | 204 | 22 | 37 | 12.636 | P | 0.200 | 0.504  |
| WDC  | 2007 | 204 | 22 | 37 | 12.784 | P | 0.200 | -2.614 |
| O02C | 2007 | 204 | 22 | 37 | 12.996 | P | 0.200 | -1.882 |
| L05A | 2007 | 204 | 22 | 37 | 13.638 | P | 0.200 | -0.455 |
| P01C | 2007 | 204 | 22 | 37 | 14.977 | P | 0.200 | 0.356  |
| M03C | 2007 | 204 | 22 | 37 | 15.557 | P | 0.200 | -1.049 |
| M04C | 2007 | 204 | 22 | 37 | 17.185 | P | 0.200 | -0.518 |
| K05A | 2007 | 204 | 22 | 37 | 18.013 | P | 0.200 | 0.065  |
| L04A | 2007 | 204 | 22 | 37 | 19.106 | P | 0.200 | -0.850 |
| M02C | 2007 | 204 | 22 | 37 | 19.227 | P | 0.200 | -1.753 |
| N02C | 2007 | 204 | 22 | 37 | 19.988 | P | 0.200 | -0.621 |
| YBH  | 2007 | 204 | 22 | 37 | 20.130 | P | 0.200 | -1.733 |
| K04A | 2007 | 204 | 22 | 37 | 20.482 | P | 0.200 | -0.879 |
| O01C | 2007 | 204 | 22 | 37 | 20.506 | P | 0.200 | 0.303  |
| J05A | 2007 | 204 | 22 | 37 | 22.364 | P | 0.200 | -0.080 |
| JCC  | 2007 | 204 | 22 | 37 | 24.231 | P | 0.200 | -0.101 |
| HUMO | 2007 | 204 | 22 | 37 | 25.365 | P | 0.200 | -1.872 |
| J04A | 2007 | 204 | 22 | 37 | 25.747 | P | 0.200 | -0.616 |
| M01C | 2007 | 204 | 22 | 37 | 29.270 | P | 0.200 | -0.222 |
| K02A | 2007 | 204 | 22 | 37 | 29.271 | P | 0.200 | -1.465 |
| I04A | 2007 | 204 | 22 | 37 | 29.290 | P | 0.200 | -1.131 |
| J03A | 2007 | 204 | 22 | 37 | 29.511 | P | 0.200 | -1.415 |
| DBO  | 2007 | 204 | 22 | 37 | 30.022 | P | 0.200 | -1.110 |
| J02A | 2007 | 204 | 22 | 37 | 33.277 | P | 0.200 | -0.545 |
| I03A | 2007 | 204 | 22 | 37 | 34.378 | P | 0.200 | -1.040 |
| K01A | 2007 | 204 | 22 | 37 | 35.828 | P | 0.200 | 0.169  |
| TAKO | 2007 | 204 | 22 | 37 | 38.052 | P | 0.200 | -0.104 |

|      |      |     |    |         |          |           |          |        |       |
|------|------|-----|----|---------|----------|-----------|----------|--------|-------|
| 2007 | 193  | 5   | 23 | 49.6875 | -7.93300 | -74.37900 | 152.1000 | 334    | 0.000 |
| HEC  | 2007 | 193 | 5  | 33      | 27.574   | P         | 0.200    | 0.090  |       |
| V11A | 2007 | 193 | 5  | 33      | 27.631   | P         | 0.200    | -0.274 |       |
| SVD  | 2007 | 193 | 5  | 33      | 27.933   | P         | 0.200    | 0.196  |       |
| BBR  | 2007 | 193 | 5  | 33      | 27.996   | P         | 0.200    | 0.212  |       |
| TUQ  | 2007 | 193 | 5  | 33      | 28.027   | P         | 0.200    | -0.306 |       |
| U11A | 2007 | 193 | 5  | 33      | 30.352   | P         | 0.200    | -0.031 |       |
| VTV  | 2007 | 193 | 5  | 33      | 30.510   | P         | 0.200    | -0.318 |       |
| RRX  | 2007 | 193 | 5  | 33      | 30.564   | P         | 0.200    | -0.073 |       |
| CIA  | 2007 | 193 | 5  | 33      | 30.680   | P         | 0.200    | -0.207 |       |
| BFS  | 2007 | 193 | 5  | 33      | 30.686   | P         | 0.200    | -0.340 |       |
| ADO  | 2007 | 193 | 5  | 33      | 31.086   | P         | 0.200    | -0.104 |       |
| FMP  | 2007 | 193 | 5  | 33      | 31.452   | P         | 0.200    | -0.185 |       |
| SHO  | 2007 | 193 | 5  | 33      | 31.543   | P         | 0.200    | -0.175 |       |
| GSC  | 2007 | 193 | 5  | 33      | 31.603   | P         | 0.200    | -0.051 |       |
| RPV  | 2007 | 193 | 5  | 33      | 31.987   | P         | 0.200    | -0.204 |       |
| MWC  | 2007 | 193 | 5  | 33      | 32.638   | P         | 0.200    | -0.107 |       |
| PASC | 2007 | 193 | 5  | 33      | 32.799   | P         | 0.200    | -0.238 |       |
| CHF  | 2007 | 193 | 5  | 33      | 32.898   | P         | 0.200    | -0.129 |       |
| T11A | 2007 | 193 | 5  | 33      | 33.453   | P         | 0.200    | 0.036  |       |
| VCS  | 2007 | 193 | 5  | 33      | 33.689   | P         | 0.200    | -0.394 |       |
| DEC  | 2007 | 193 | 5  | 33      | 33.815   | P         | 0.200    | -0.192 |       |
| DJJ  | 2007 | 193 | 5  | 33      | 33.911   | P         | 0.200    | -0.104 |       |
| U10A | 2007 | 193 | 5  | 33      | 34.504   | P         | 0.200    | 0.145  |       |
| EDW2 | 2007 | 193 | 5  | 33      | 34.587   | P         | 0.200    | -0.552 |       |
| SLA  | 2007 | 193 | 5  | 33      | 35.870   | P         | 0.200    | -0.349 |       |
| LRL  | 2007 | 193 | 5  | 33      | 36.067   | P         | 0.200    | -0.188 |       |
| LGU  | 2007 | 193 | 5  | 33      | 36.464   | P         | 0.200    | -0.281 |       |

|      |      |     |   |    |        |   |       |        |
|------|------|-----|---|----|--------|---|-------|--------|
| TPNV | 2007 | 193 | 5 | 33 | 36.641 | P | 0.200 | 0.304  |
| FUR  | 2007 | 193 | 5 | 33 | 36.737 | P | 0.200 | 0.038  |
| MPM  | 2007 | 193 | 5 | 33 | 37.475 | P | 0.200 | -0.491 |
| S11A | 2007 | 193 | 5 | 33 | 37.888 | P | 0.200 | 0.570  |
| SCZ2 | 2007 | 193 | 5 | 33 | 38.374 | P | 0.200 | -0.544 |
| ARV  | 2007 | 193 | 5 | 33 | 39.639 | P | 0.200 | -0.087 |
| R11A | 2007 | 193 | 5 | 33 | 40.134 | P | 0.200 | 0.227  |
| ISA  | 2007 | 193 | 5 | 33 | 40.366 | P | 0.200 | -0.181 |
| SBC  | 2007 | 193 | 5 | 33 | 40.711 | P | 0.200 | -0.296 |
| GRA  | 2007 | 193 | 5 | 33 | 41.550 | P | 0.200 | 0.288  |
| CWC  | 2007 | 193 | 5 | 33 | 42.039 | P | 0.200 | -0.042 |
| S10A | 2007 | 193 | 5 | 33 | 42.248 | P | 0.200 | 0.180  |
| Q11A | 2007 | 193 | 5 | 33 | 42.436 | P | 0.200 | 0.178  |
| R10A | 2007 | 193 | 5 | 33 | 43.110 | P | 0.200 | 0.673  |
| MPP  | 2007 | 193 | 5 | 33 | 43.139 | P | 0.200 | -0.298 |
| VES  | 2007 | 193 | 5 | 33 | 43.580 | P | 0.200 | -0.225 |
| S09A | 2007 | 193 | 5 | 33 | 43.682 | P | 0.200 | -0.104 |
| TPH  | 2007 | 193 | 5 | 33 | 45.333 | P | 0.200 | 0.017  |
| TIN  | 2007 | 193 | 5 | 33 | 45.402 | P | 0.200 | 0.249  |
| R09A | 2007 | 193 | 5 | 33 | 45.477 | P | 0.200 | 0.031  |
| RCT  | 2007 | 193 | 5 | 33 | 45.613 | P | 0.200 | -0.792 |
| Q10A | 2007 | 193 | 5 | 33 | 45.666 | P | 0.200 | 0.435  |
| SMM  | 2007 | 193 | 5 | 33 | 45.796 | P | 0.200 | -0.031 |
| HELL | 2007 | 193 | 5 | 33 | 46.787 | P | 0.200 | -0.247 |
| S08C | 2007 | 193 | 5 | 33 | 47.218 | P | 0.200 | 0.150  |
| V05C | 2007 | 193 | 5 | 33 | 47.580 | P | 0.200 | -0.051 |
| PHL  | 2007 | 193 | 5 | 33 | 48.467 | P | 0.200 | -0.232 |
| Q09A | 2007 | 193 | 5 | 33 | 48.639 | P | 0.200 | 0.179  |
| P10A | 2007 | 193 | 5 | 33 | 49.270 | P | 0.200 | 0.309  |
| T06C | 2007 | 193 | 5 | 33 | 49.654 | P | 0.200 | -1.550 |
| U05C | 2007 | 193 | 5 | 33 | 49.697 | P | 0.200 | -0.630 |
| PKD  | 2007 | 193 | 5 | 33 | 50.202 | P | 0.200 | -0.529 |
| R08A | 2007 | 193 | 5 | 33 | 50.272 | P | 0.200 | 0.084  |
| MLAC | 2007 | 193 | 5 | 33 | 50.349 | P | 0.200 | 0.091  |
| V04C | 2007 | 193 | 5 | 33 | 50.949 | P | 0.200 | -0.100 |
| Q08A | 2007 | 193 | 5 | 33 | 51.373 | P | 0.200 | -0.109 |
| P09A | 2007 | 193 | 5 | 33 | 51.373 | P | 0.200 | 0.005  |
| U04C | 2007 | 193 | 5 | 33 | 53.091 | P | 0.200 | -0.263 |
| R07C | 2007 | 193 | 5 | 33 | 53.266 | P | 0.200 | 0.295  |
| SN55 | 2007 | 193 | 5 | 33 | 53.447 | P | 0.200 | -0.074 |
| YO11 | 2007 | 193 | 5 | 33 | 53.647 | P | 0.200 | -0.166 |
| YO10 | 2007 | 193 | 5 | 33 | 53.696 | P | 0.200 | -0.163 |
| YO09 | 2007 | 193 | 5 | 33 | 53.739 | P | 0.200 | -0.214 |
| YO08 | 2007 | 193 | 5 | 33 | 53.941 | P | 0.200 | -0.120 |
| YO07 | 2007 | 193 | 5 | 33 | 54.115 | P | 0.200 | -0.197 |
| O09A | 2007 | 193 | 5 | 33 | 54.144 | P | 0.200 | -0.045 |
| V03C | 2007 | 193 | 5 | 33 | 54.255 | P | 0.200 | 0.190  |
| YO06 | 2007 | 193 | 5 | 33 | 54.409 | P | 0.200 | -0.155 |
| SN63 | 2007 | 193 | 5 | 33 | 54.447 | P | 0.200 | -0.313 |
| YO03 | 2007 | 193 | 5 | 33 | 54.502 | P | 0.200 | -0.290 |
| YO02 | 2007 | 193 | 5 | 33 | 54.546 | P | 0.200 | -0.317 |
| YO01 | 2007 | 193 | 5 | 33 | 54.563 | P | 0.200 | -0.191 |
| SN64 | 2007 | 193 | 5 | 33 | 54.602 | P | 0.200 | -0.093 |
| YO04 | 2007 | 193 | 5 | 33 | 54.635 | P | 0.200 | -0.111 |
| YO05 | 2007 | 193 | 5 | 33 | 54.674 | P | 0.200 | -0.084 |
| S05C | 2007 | 193 | 5 | 33 | 54.953 | P | 0.200 | -0.240 |
| BMN  | 2007 | 193 | 5 | 33 | 54.996 | P | 0.200 | -0.363 |
| S06C | 2007 | 193 | 5 | 33 | 55.313 | P | 0.200 | -0.187 |
| P08A | 2007 | 193 | 5 | 33 | 55.745 | P | 0.200 | 0.132  |
| HAST | 2007 | 193 | 5 | 33 | 56.697 | P | 0.200 | -0.203 |
| R06C | 2007 | 193 | 5 | 33 | 56.856 | P | 0.200 | 0.386  |
| SAO  | 2007 | 193 | 5 | 33 | 57.629 | P | 0.200 | -0.228 |
| CMB  | 2007 | 193 | 5 | 33 | 58.071 | P | 0.200 | -0.242 |

|      |      |     |   |    |        |   |       |        |
|------|------|-----|---|----|--------|---|-------|--------|
| SN98 | 2007 | 193 | 5 | 33 | 58.126 | P | 0.200 | 0.163  |
| PACP | 2007 | 193 | 5 | 33 | 58.176 | P | 0.200 | 0.069  |
| SN86 | 2007 | 193 | 5 | 33 | 58.348 | P | 0.200 | 0.368  |
| P07A | 2007 | 193 | 5 | 33 | 58.359 | P | 0.200 | 0.198  |
| SN87 | 2007 | 193 | 5 | 33 | 58.460 | P | 0.200 | 0.461  |
| SN96 | 2007 | 193 | 5 | 33 | 59.097 | P | 0.200 | 0.319  |
| SN93 | 2007 | 193 | 5 | 33 | 59.597 | P | 0.200 | 0.051  |
| SN97 | 2007 | 193 | 5 | 33 | 59.669 | P | 0.200 | 0.534  |
| N08A | 2007 | 193 | 5 | 33 | 59.897 | P | 0.200 | -0.569 |
| S04C | 2007 | 193 | 5 | 34 | 0.216  | P | 0.200 | 0.172  |
| O07A | 2007 | 193 | 5 | 34 | 0.235  | P | 0.200 | -0.476 |
| R05C | 2007 | 193 | 5 | 34 | 0.296  | P | 0.200 | 0.350  |
| SNB9 | 2007 | 193 | 5 | 34 | 0.780  | P | 0.200 | 0.244  |
| SNA4 | 2007 | 193 | 5 | 34 | 0.787  | P | 0.200 | 0.005  |
| SNA5 | 2007 | 193 | 5 | 34 | 0.830  | P | 0.200 | 0.326  |
| SNA7 | 2007 | 193 | 5 | 34 | 0.885  | P | 0.200 | 0.514  |
| SNA3 | 2007 | 193 | 5 | 34 | 1.136  | P | 0.200 | 0.144  |
| MHC  | 2007 | 193 | 5 | 34 | 1.230  | P | 0.200 | 0.232  |
| WCN  | 2007 | 193 | 5 | 34 | 1.309  | P | 0.200 | 0.427  |
| SNB6 | 2007 | 193 | 5 | 34 | 1.796  | P | 0.200 | 0.477  |
| R04C | 2007 | 193 | 5 | 34 | 1.889  | P | 0.200 | 0.593  |
| SNB7 | 2007 | 193 | 5 | 34 | 2.016  | P | 0.200 | 0.493  |
| SNB5 | 2007 | 193 | 5 | 34 | 2.293  | P | 0.200 | 0.102  |
| BNLO | 2007 | 193 | 5 | 34 | 2.305  | P | 0.200 | -0.194 |
| LAVA | 2007 | 193 | 5 | 34 | 2.479  | P | 0.200 | -0.087 |
| SNB3 | 2007 | 193 | 5 | 34 | 2.858  | P | 0.200 | 0.082  |
| WENL | 2007 | 193 | 5 | 34 | 2.938  | P | 0.200 | 0.631  |
| N07B | 2007 | 193 | 5 | 34 | 3.011  | P | 0.200 | -0.630 |
| P06A | 2007 | 193 | 5 | 34 | 3.200  | P | 0.200 | 0.292  |
| SNC6 | 2007 | 193 | 5 | 34 | 3.228  | P | 0.200 | 0.397  |
| SNC4 | 2007 | 193 | 5 | 34 | 3.459  | P | 0.200 | -0.191 |
| JRSC | 2007 | 193 | 5 | 34 | 3.612  | P | 0.200 | 0.058  |
| SNC5 | 2007 | 193 | 5 | 34 | 3.658  | P | 0.200 | -0.097 |
| SNC7 | 2007 | 193 | 5 | 34 | 3.860  | P | 0.200 | 0.305  |
| SND9 | 2007 | 193 | 5 | 34 | 4.337  | P | 0.200 | 0.385  |
| SND8 | 2007 | 193 | 5 | 34 | 4.391  | P | 0.200 | 0.279  |
| SNC3 | 2007 | 193 | 5 | 34 | 4.453  | P | 0.200 | 0.250  |
| O06A | 2007 | 193 | 5 | 34 | 4.684  | P | 0.200 | 0.224  |
| P05C | 2007 | 193 | 5 | 34 | 4.752  | P | 0.200 | 0.510  |
| BDM  | 2007 | 193 | 5 | 34 | 4.761  | P | 0.200 | 0.627  |
| SND5 | 2007 | 193 | 5 | 34 | 4.836  | P | 0.200 | -0.167 |
| SND4 | 2007 | 193 | 5 | 34 | 4.996  | P | 0.200 | -0.352 |
| BRIB | 2007 | 193 | 5 | 34 | 5.533  | P | 0.200 | 0.331  |
| BRK  | 2007 | 193 | 5 | 34 | 5.574  | P | 0.200 | 0.197  |
| BKS  | 2007 | 193 | 5 | 34 | 5.626  | P | 0.200 | 0.203  |
| BEK  | 2007 | 193 | 5 | 34 | 5.690  | P | 0.200 | 0.230  |
| SNE9 | 2007 | 193 | 5 | 34 | 5.793  | P | 0.200 | 0.298  |
| SND7 | 2007 | 193 | 5 | 34 | 5.848  | P | 0.200 | 0.392  |
| Q04C | 2007 | 193 | 5 | 34 | 5.974  | P | 0.200 | 0.529  |
| SNE6 | 2007 | 193 | 5 | 34 | 6.205  | P | 0.200 | 0.288  |
| M07A | 2007 | 193 | 5 | 34 | 6.540  | P | 0.200 | -0.394 |
| SNE5 | 2007 | 193 | 5 | 34 | 6.665  | P | 0.200 | -0.071 |
| N06A | 2007 | 193 | 5 | 34 | 6.772  | P | 0.200 | -0.039 |
| SNE4 | 2007 | 193 | 5 | 34 | 6.790  | P | 0.200 | -0.082 |
| SNF9 | 2007 | 193 | 5 | 34 | 6.995  | P | 0.200 | 0.091  |
| SNE7 | 2007 | 193 | 5 | 34 | 7.109  | P | 0.200 | 0.343  |
| SNF8 | 2007 | 193 | 5 | 34 | 7.588  | P | 0.200 | 0.286  |
| SNF6 | 2007 | 193 | 5 | 34 | 7.691  | P | 0.200 | -0.077 |
| FARB | 2007 | 193 | 5 | 34 | 7.805  | P | 0.200 | -0.213 |
| CVS  | 2007 | 193 | 5 | 34 | 7.925  | P | 0.200 | -0.171 |
| Q03C | 2007 | 193 | 5 | 34 | 8.216  | P | 0.200 | 0.899  |
| O05C | 2007 | 193 | 5 | 34 | 8.493  | P | 0.200 | 0.507  |
| SUTB | 2007 | 193 | 5 | 34 | 8.500  | P | 0.200 | -0.119 |

|      |      |     |   |    |        |   |       |        |
|------|------|-----|---|----|--------|---|-------|--------|
| MCCM | 2007 | 193 | 5 | 34 | 9.045  | P | 0.200 | 0.000  |
| ORV  | 2007 | 193 | 5 | 34 | 9.093  | P | 0.200 | 0.507  |
| SNG5 | 2007 | 193 | 5 | 34 | 9.635  | P | 0.200 | 0.081  |
| SNG7 | 2007 | 193 | 5 | 34 | 9.834  | P | 0.200 | 0.215  |
| O04C | 2007 | 193 | 5 | 34 | 10.165 | P | 0.200 | 0.035  |
| ELFS | 2007 | 193 | 5 | 34 | 10.231 | P | 0.200 | 0.260  |
| L07A | 2007 | 193 | 5 | 34 | 10.267 | P | 0.200 | 0.112  |
| MNRC | 2007 | 193 | 5 | 34 | 10.412 | P | 0.200 | 0.427  |
| M06C | 2007 | 193 | 5 | 34 | 11.185 | P | 0.200 | 0.051  |
| O03C | 2007 | 193 | 5 | 34 | 11.726 | P | 0.200 | -0.778 |
| HATC | 2007 | 193 | 5 | 34 | 13.370 | P | 0.200 | -0.146 |
| M05C | 2007 | 193 | 5 | 34 | 14.364 | P | 0.200 | -0.004 |
| GASB | 2007 | 193 | 5 | 34 | 14.785 | P | 0.200 | 0.648  |
| WDC  | 2007 | 193 | 5 | 34 | 15.006 | P | 0.200 | -1.810 |
| O02C | 2007 | 193 | 5 | 34 | 15.325 | P | 0.200 | -0.984 |
| L05A | 2007 | 193 | 5 | 34 | 16.282 | P | 0.200 | 0.288  |
| P01C | 2007 | 193 | 5 | 34 | 16.569 | P | 0.200 | 0.594  |
| M03C | 2007 | 193 | 5 | 34 | 17.099 | P | 0.200 | -0.741 |
| M04C | 2007 | 193 | 5 | 34 | 18.560 | P | 0.200 | -0.172 |
| K05A | 2007 | 193 | 5 | 34 | 19.385 | P | 0.200 | 0.434  |
| L04A | 2007 | 193 | 5 | 34 | 20.264 | P | 0.200 | -0.182 |
| M02C | 2007 | 193 | 5 | 34 | 20.373 | P | 0.200 | -0.791 |
| YBH  | 2007 | 193 | 5 | 34 | 20.595 | P | 0.200 | -1.250 |
| N02C | 2007 | 193 | 5 | 34 | 20.669 | P | 0.200 | -0.161 |
| O01C | 2007 | 193 | 5 | 34 | 21.014 | P | 0.200 | 0.677  |
| K04A | 2007 | 193 | 5 | 34 | 21.501 | P | 0.200 | -0.039 |
| J05A | 2007 | 193 | 5 | 34 | 22.585 | P | 0.200 | 0.241  |
| JCC  | 2007 | 193 | 5 | 34 | 23.953 | P | 0.200 | 0.422  |
| J04A | 2007 | 193 | 5 | 34 | 25.209 | P | 0.200 | -0.099 |
| HUMO | 2007 | 193 | 5 | 34 | 25.255 | P | 0.200 | -0.716 |
| L02A | 2007 | 193 | 5 | 34 | 26.769 | P | 0.200 | 0.013  |
| I04A | 2007 | 193 | 5 | 34 | 27.717 | P | 0.200 | -0.588 |
| M01C | 2007 | 193 | 5 | 34 | 28.133 | P | 0.200 | 0.510  |
| K02A | 2007 | 193 | 5 | 34 | 28.391 | P | 0.200 | -0.252 |
| DBO  | 2007 | 193 | 5 | 34 | 28.978 | P | 0.200 | 0.075  |
| J03A | 2007 | 193 | 5 | 34 | 29.091 | P | 0.200 | 0.329  |
| J02A | 2007 | 193 | 5 | 34 | 31.408 | P | 0.200 | 0.496  |
| I03A | 2007 | 193 | 5 | 34 | 32.017 | P | 0.200 | -0.111 |
| K01A | 2007 | 193 | 5 | 34 | 32.908 | P | 0.200 | 0.592  |
| TAKO | 2007 | 193 | 5 | 34 | 34.997 | P | 0.200 | 0.780  |

|      |      |    |    |        |         |           |        |       |       |
|------|------|----|----|--------|---------|-----------|--------|-------|-------|
| 2007 | 77   | 2  | 11 | 6.4459 | 4.58500 | -78.50200 | 8.0000 | 317   | 0.000 |
| V11A | 2007 | 77 | 2  | 19     | 31.330  | P         | 0.200  | 0.446 |       |
| HEC  | 2007 | 77 | 2  | 19     | 32.127  | P         | 0.200  | 0.661 |       |
| TUQ  | 2007 | 77 | 2  | 19     | 32.217  | P         | 0.200  | 0.355 |       |
| BBR  | 2007 | 77 | 2  | 19     | 33.371  | P         | 0.200  | 0.829 |       |
| SVD  | 2007 | 77 | 2  | 19     | 33.630  | P         | 0.200  | 0.914 |       |
| U11A | 2007 | 77 | 2  | 19     | 33.761  | P         | 0.200  | 0.522 |       |
| SDD  | 2007 | 77 | 2  | 19     | 34.360  | P         | 0.200  | 0.626 |       |
| SHO  | 2007 | 77 | 2  | 19     | 35.882  | P         | 0.200  | 0.329 |       |
| RRX  | 2007 | 77 | 2  | 19     | 35.941  | P         | 0.200  | 0.626 |       |
| VTV  | 2007 | 77 | 2  | 19     | 36.345  | P         | 0.200  | 0.411 |       |
| GSC  | 2007 | 77 | 2  | 19     | 36.560  | P         | 0.200  | 0.486 |       |
| T11A | 2007 | 77 | 2  | 19     | 36.776  | P         | 0.200  | 0.677 |       |
| ADO  | 2007 | 77 | 2  | 19     | 36.932  | P         | 0.200  | 0.509 |       |
| BFS  | 2007 | 77 | 2  | 19     | 36.989  | P         | 0.200  | 0.442 |       |
| CIA  | 2007 | 77 | 2  | 19     | 37.812  | P         | 0.200  | 0.349 |       |
| FMP  | 2007 | 77 | 2  | 19     | 38.413  | P         | 0.200  | 0.474 |       |
| U10A | 2007 | 77 | 2  | 19     | 38.746  | P         | 0.200  | 0.606 |       |
| MWC  | 2007 | 77 | 2  | 19     | 39.163  | P         | 0.200  | 0.454 |       |
| RPV  | 2007 | 77 | 2  | 19     | 39.206  | P         | 0.200  | 0.572 |       |
| CHF  | 2007 | 77 | 2  | 19     | 39.360  | P         | 0.200  | 0.418 |       |
| PASC | 2007 | 77 | 2  | 19     | 39.520  | P         | 0.200  | 0.383 |       |

|      |      |    |   |    |        |   |       |        |
|------|------|----|---|----|--------|---|-------|--------|
| USC  | 2007 | 77 | 2 | 19 | 39.949 | P | 0.200 | 0.938  |
| VCS  | 2007 | 77 | 2 | 19 | 40.310 | P | 0.200 | 0.335  |
| DEC  | 2007 | 77 | 2 | 19 | 40.620 | P | 0.200 | 0.381  |
| DJJ  | 2007 | 77 | 2 | 19 | 40.881 | P | 0.200 | 0.508  |
| TPNV | 2007 | 77 | 2 | 19 | 40.918 | P | 0.200 | 0.857  |
| EDW2 | 2007 | 77 | 2 | 19 | 41.040 | P | 0.200 | 0.163  |
| S11A | 2007 | 77 | 2 | 19 | 41.212 | P | 0.200 | 0.696  |
| FUR  | 2007 | 77 | 2 | 19 | 41.551 | P | 0.200 | 0.486  |
| LRL  | 2007 | 77 | 2 | 19 | 41.934 | P | 0.200 | 0.352  |
| MPM  | 2007 | 77 | 2 | 19 | 43.157 | P | 0.200 | 0.204  |
| R11A | 2007 | 77 | 2 | 19 | 43.417 | P | 0.200 | 0.466  |
| SNCC | 2007 | 77 | 2 | 19 | 43.500 | P | 0.200 | 0.304  |
| OSI  | 2007 | 77 | 2 | 19 | 44.081 | P | 0.200 | 0.218  |
| LGU  | 2007 | 77 | 2 | 19 | 44.171 | P | 0.200 | 0.376  |
| Q11A | 2007 | 77 | 2 | 19 | 45.606 | P | 0.200 | 0.209  |
| S10A | 2007 | 77 | 2 | 19 | 46.571 | P | 0.200 | 0.502  |
| SCZ2 | 2007 | 77 | 2 | 19 | 46.609 | P | 0.200 | -0.012 |
| GRA  | 2007 | 77 | 2 | 19 | 46.657 | P | 0.200 | 0.605  |
| ARV  | 2007 | 77 | 2 | 19 | 46.743 | P | 0.200 | 0.449  |
| R10A | 2007 | 77 | 2 | 19 | 46.858 | P | 0.200 | 0.690  |
| ISA  | 2007 | 77 | 2 | 19 | 47.249 | P | 0.200 | 0.646  |
| CWC  | 2007 | 77 | 2 | 19 | 48.005 | P | 0.200 | 0.388  |
| S09A | 2007 | 77 | 2 | 19 | 48.656 | P | 0.200 | 0.242  |
| SBC  | 2007 | 77 | 2 | 19 | 48.947 | P | 0.200 | 0.324  |
| Q10A | 2007 | 77 | 2 | 19 | 49.616 | P | 0.200 | 0.545  |
| TPH  | 2007 | 77 | 2 | 19 | 50.043 | P | 0.200 | 0.125  |
| R09A | 2007 | 77 | 2 | 19 | 50.093 | P | 0.200 | 0.207  |
| TIN  | 2007 | 77 | 2 | 19 | 51.241 | P | 0.200 | 0.471  |
| MPP  | 2007 | 77 | 2 | 19 | 51.254 | P | 0.200 | 0.190  |
| RCT  | 2007 | 77 | 2 | 19 | 52.898 | P | 0.200 | -0.190 |
| S08C | 2007 | 77 | 2 | 19 | 53.059 | P | 0.200 | 0.454  |
| Q09A | 2007 | 77 | 2 | 19 | 53.156 | P | 0.200 | 0.148  |
| P10A | 2007 | 77 | 2 | 19 | 53.221 | P | 0.200 | 0.357  |
| HELL | 2007 | 77 | 2 | 19 | 53.695 | P | 0.200 | 0.215  |
| SMM  | 2007 | 77 | 2 | 19 | 53.938 | P | 0.200 | 0.431  |
| SN14 | 2007 | 77 | 2 | 19 | 54.469 | P | 0.200 | 0.148  |
| SN12 | 2007 | 77 | 2 | 19 | 54.704 | P | 0.200 | 0.208  |
| V05C | 2007 | 77 | 2 | 19 | 55.252 | P | 0.200 | 0.216  |
| R08A | 2007 | 77 | 2 | 19 | 55.801 | P | 0.200 | 0.237  |
| P09A | 2007 | 77 | 2 | 19 | 55.924 | P | 0.200 | 0.072  |
| SN34 | 2007 | 77 | 2 | 19 | 56.722 | P | 0.200 | 0.071  |
| Q08A | 2007 | 77 | 2 | 19 | 56.728 | P | 0.200 | 0.009  |
| MLAC | 2007 | 77 | 2 | 19 | 56.812 | P | 0.200 | 0.407  |
| PHL  | 2007 | 77 | 2 | 19 | 56.940 | P | 0.200 | 0.083  |
| T06C | 2007 | 77 | 2 | 19 | 57.231 | P | 0.200 | -1.026 |
| U05C | 2007 | 77 | 2 | 19 | 57.491 | P | 0.200 | -0.429 |
| PKD  | 2007 | 77 | 2 | 19 | 58.493 | P | 0.200 | -0.257 |
| O09A | 2007 | 77 | 2 | 19 | 58.727 | P | 0.200 | -0.068 |
| SN43 | 2007 | 77 | 2 | 19 | 58.795 | P | 0.200 | -0.154 |
| V04C | 2007 | 77 | 2 | 19 | 59.590 | P | 0.200 | 0.111  |
| R07C | 2007 | 77 | 2 | 19 | 59.740 | P | 0.200 | 0.475  |
| SN55 | 2007 | 77 | 2 | 20 | 0.258  | P | 0.200 | 0.157  |
| P08A | 2007 | 77 | 2 | 20 | 0.792  | P | 0.200 | -0.176 |
| U04C | 2007 | 77 | 2 | 20 | 1.229  | P | 0.200 | -0.378 |
| Q07A | 2007 | 77 | 2 | 20 | 1.548  | P | 0.200 | 0.077  |
| SN65 | 2007 | 77 | 2 | 20 | 1.705  | P | 0.200 | 0.162  |
| SN64 | 2007 | 77 | 2 | 20 | 1.712  | P | 0.200 | 0.139  |
| SN63 | 2007 | 77 | 2 | 20 | 1.724  | P | 0.200 | -0.082 |
| S05C | 2007 | 77 | 2 | 20 | 2.377  | P | 0.200 | -0.408 |
| S06C | 2007 | 77 | 2 | 20 | 2.462  | P | 0.200 | -0.107 |
| T05C | 2007 | 77 | 2 | 20 | 2.778  | P | 0.200 | -0.135 |
| V03C | 2007 | 77 | 2 | 20 | 2.814  | P | 0.200 | -0.006 |
| SN75 | 2007 | 77 | 2 | 20 | 3.194  | P | 0.200 | 0.258  |



|      |      |    |   |    |        |   |       |        |
|------|------|----|---|----|--------|---|-------|--------|
| SN74 | 2007 | 77 | 2 | 20 | 3.342  | P | 0.200 | -0.052 |
| O08A | 2007 | 77 | 2 | 20 | 3.393  | P | 0.200 | -0.640 |
| R06C | 2007 | 77 | 2 | 20 | 3.476  | P | 0.200 | 0.390  |
| P07A | 2007 | 77 | 2 | 20 | 4.080  | P | 0.200 | -0.162 |
| SN98 | 2007 | 77 | 2 | 20 | 4.692  | P | 0.200 | 0.192  |
| SN85 | 2007 | 77 | 2 | 20 | 5.085  | P | 0.200 | 0.322  |
| SN84 | 2007 | 77 | 2 | 20 | 5.154  | P | 0.200 | -0.035 |
| N08A | 2007 | 77 | 2 | 20 | 5.247  | P | 0.200 | -0.644 |
| HAST | 2007 | 77 | 2 | 20 | 5.632  | P | 0.200 | -0.197 |
| CMB  | 2007 | 77 | 2 | 20 | 5.709  | P | 0.200 | -0.107 |
| O07A | 2007 | 77 | 2 | 20 | 6.153  | P | 0.200 | -0.618 |
| SN96 | 2007 | 77 | 2 | 20 | 6.370  | P | 0.200 | 0.412  |
| SAO  | 2007 | 77 | 2 | 20 | 6.432  | P | 0.200 | -0.193 |
| SN97 | 2007 | 77 | 2 | 20 | 6.449  | P | 0.200 | 0.384  |
| SNA8 | 2007 | 77 | 2 | 20 | 6.532  | P | 0.200 | 0.379  |
| PACP | 2007 | 77 | 2 | 20 | 6.576  | P | 0.200 | -0.104 |
| SN95 | 2007 | 77 | 2 | 20 | 6.581  | P | 0.200 | 0.108  |
| SNB9 | 2007 | 77 | 2 | 20 | 7.339  | P | 0.200 | 0.129  |
| SN93 | 2007 | 77 | 2 | 20 | 7.377  | P | 0.200 | 0.066  |
| R05C | 2007 | 77 | 2 | 20 | 7.432  | P | 0.200 | 0.340  |
| SNA7 | 2007 | 77 | 2 | 20 | 7.735  | P | 0.200 | 0.395  |
| WCN  | 2007 | 77 | 2 | 20 | 8.119  | P | 0.200 | 0.406  |
| SNA5 | 2007 | 77 | 2 | 20 | 8.202  | P | 0.200 | 0.273  |
| SNA4 | 2007 | 77 | 2 | 20 | 8.465  | P | 0.200 | 0.081  |
| S04C | 2007 | 77 | 2 | 20 | 8.718  | P | 0.200 | 0.171  |
| N07B | 2007 | 77 | 2 | 20 | 8.785  | P | 0.200 | -1.039 |
| SNA3 | 2007 | 77 | 2 | 20 | 8.938  | P | 0.200 | 0.177  |
| SNB6 | 2007 | 77 | 2 | 20 | 8.994  | P | 0.200 | 0.342  |
| SNB7 | 2007 | 77 | 2 | 20 | 9.151  | P | 0.200 | 0.389  |
| R04C | 2007 | 77 | 2 | 20 | 9.767  | P | 0.200 | 0.400  |
| P06A | 2007 | 77 | 2 | 20 | 9.877  | P | 0.200 | 0.014  |
| SNC8 | 2007 | 77 | 2 | 20 | 10.153 | P | 0.200 | 0.223  |
| MHC  | 2007 | 77 | 2 | 20 | 10.161 | P | 0.200 | 0.324  |
| LAVA | 2007 | 77 | 2 | 20 | 10.322 | P | 0.200 | -0.037 |
| SNC6 | 2007 | 77 | 2 | 20 | 10.645 | P | 0.200 | 0.265  |
| SNB3 | 2007 | 77 | 2 | 20 | 10.902 | P | 0.200 | 0.069  |
| O06A | 2007 | 77 | 2 | 20 | 10.942 | P | 0.200 | -0.456 |
| SND9 | 2007 | 77 | 2 | 20 | 11.060 | P | 0.200 | 0.016  |
| SNC7 | 2007 | 77 | 2 | 20 | 11.193 | P | 0.200 | 0.230  |
| SNC5 | 2007 | 77 | 2 | 20 | 11.392 | P | 0.200 | -0.172 |
| SNC4 | 2007 | 77 | 2 | 20 | 11.488 | P | 0.200 | -0.203 |
| SND8 | 2007 | 77 | 2 | 20 | 11.511 | P | 0.200 | 0.149  |
| BNLO | 2007 | 77 | 2 | 20 | 11.782 | P | 0.200 | -0.072 |
| WENL | 2007 | 77 | 2 | 20 | 11.828 | P | 0.200 | 0.584  |
| M07A | 2007 | 77 | 2 | 20 | 12.274 | P | 0.200 | -1.062 |
| P05C | 2007 | 77 | 2 | 20 | 12.284 | P | 0.200 | 0.356  |
| SNC3 | 2007 | 77 | 2 | 20 | 12.472 | P | 0.200 | 0.062  |
| SNE9 | 2007 | 77 | 2 | 20 | 12.621 | P | 0.200 | -0.118 |
| SND5 | 2007 | 77 | 2 | 20 | 12.870 | P | 0.200 | -0.115 |
| BEK  | 2007 | 77 | 2 | 20 | 12.924 | P | 0.200 | 0.057  |
| JRSC | 2007 | 77 | 2 | 20 | 13.049 | P | 0.200 | 0.068  |
| SND4 | 2007 | 77 | 2 | 20 | 13.059 | P | 0.200 | -0.477 |
| N06A | 2007 | 77 | 2 | 20 | 13.094 | P | 0.200 | -0.669 |
| SND7 | 2007 | 77 | 2 | 20 | 13.285 | P | 0.200 | 0.226  |
| BDM  | 2007 | 77 | 2 | 20 | 13.650 | P | 0.200 | 0.574  |
| SNE6 | 2007 | 77 | 2 | 20 | 13.893 | P | 0.200 | 0.127  |
| SNF9 | 2007 | 77 | 2 | 20 | 14.007 | P | 0.200 | -0.293 |
| Q04C | 2007 | 77 | 2 | 20 | 14.046 | P | 0.200 | 0.230  |
| SNE5 | 2007 | 77 | 2 | 20 | 14.645 | P | 0.200 | -0.237 |
| SNE7 | 2007 | 77 | 2 | 20 | 14.662 | P | 0.200 | 0.218  |
| BRIB | 2007 | 77 | 2 | 20 | 14.747 | P | 0.200 | 0.342  |
| BRK  | 2007 | 77 | 2 | 20 | 14.847 | P | 0.200 | 0.119  |
| SNE4 | 2007 | 77 | 2 | 20 | 14.898 | P | 0.200 | -0.270 |

|      |      |    |   |    |        |   |       |        |
|------|------|----|---|----|--------|---|-------|--------|
| SNF8 | 2007 | 77 | 2 | 20 | 14.920 | P | 0.200 | -0.024 |
| BKS  | 2007 | 77 | 2 | 20 | 14.926 | P | 0.200 | 0.176  |
| SNF6 | 2007 | 77 | 2 | 20 | 15.638 | P | 0.200 | -0.187 |
| O05C | 2007 | 77 | 2 | 20 | 16.023 | P | 0.200 | 0.128  |
| L07A | 2007 | 77 | 2 | 20 | 16.096 | P | 0.200 | -0.650 |
| Q03C | 2007 | 77 | 2 | 20 | 16.948 | P | 0.200 | 0.670  |
| SUTB | 2007 | 77 | 2 | 20 | 17.058 | P | 0.200 | -0.279 |
| ORV  | 2007 | 77 | 2 | 20 | 17.166 | P | 0.200 | 0.137  |
| ELFS | 2007 | 77 | 2 | 20 | 17.230 | P | 0.200 | -0.431 |
| CVS  | 2007 | 77 | 2 | 20 | 17.358 | P | 0.200 | -0.183 |
| SNG7 | 2007 | 77 | 2 | 20 | 17.634 | P | 0.200 | -0.100 |
| FARB | 2007 | 77 | 2 | 20 | 17.808 | P | 0.200 | -0.263 |
| SNG5 | 2007 | 77 | 2 | 20 | 17.821 | P | 0.200 | -0.147 |
| M06C | 2007 | 77 | 2 | 20 | 17.925 | P | 0.200 | -0.733 |
| O04C | 2007 | 77 | 2 | 20 | 17.932 | P | 0.200 | -0.249 |
| MCCM | 2007 | 77 | 2 | 20 | 18.903 | P | 0.200 | -0.048 |
| MNRC | 2007 | 77 | 2 | 20 | 19.657 | P | 0.200 | 0.307  |
| O03C | 2007 | 77 | 2 | 20 | 20.246 | P | 0.200 | -1.120 |
| HATC | 2007 | 77 | 2 | 20 | 21.207 | P | 0.200 | -0.650 |
| M05C | 2007 | 77 | 2 | 20 | 21.681 | P | 0.200 | -0.781 |
| L05A | 2007 | 77 | 2 | 20 | 23.161 | P | 0.200 | -0.663 |
| HOPS | 2007 | 77 | 2 | 20 | 23.289 | P | 0.200 | 0.402  |
| GASB | 2007 | 77 | 2 | 20 | 23.843 | P | 0.200 | 0.176  |
| WDC  | 2007 | 77 | 2 | 20 | 24.042 | P | 0.200 | -2.067 |
| O02C | 2007 | 77 | 2 | 20 | 24.954 | P | 0.200 | -0.895 |
| M03C | 2007 | 77 | 2 | 20 | 25.551 | P | 0.200 | -1.194 |
| K05A | 2007 | 77 | 2 | 20 | 26.161 | P | 0.200 | -0.693 |
| P01C | 2007 | 77 | 2 | 20 | 26.456 | P | 0.200 | 0.409  |
| M04C | 2007 | 77 | 2 | 20 | 26.574 | P | 0.200 | -0.795 |
| L04A | 2007 | 77 | 2 | 20 | 28.233 | P | 0.200 | -0.948 |
| M02C | 2007 | 77 | 2 | 20 | 29.151 | P | 0.200 | -1.551 |
| K04A | 2007 | 77 | 2 | 20 | 29.307 | P | 0.200 | -0.841 |
| YBH  | 2007 | 77 | 2 | 20 | 29.596 | P | 0.200 | -1.674 |
| J05A | 2007 | 77 | 2 | 20 | 29.840 | P | 0.200 | -0.746 |
| N02C | 2007 | 77 | 2 | 20 | 29.910 | P | 0.200 | -0.822 |
| O01C | 2007 | 77 | 2 | 20 | 30.959 | P | 0.200 | 0.195  |
| J04A | 2007 | 77 | 2 | 20 | 33.516 | P | 0.200 | -0.753 |
| JCC  | 2007 | 77 | 2 | 20 | 34.072 | P | 0.200 | -0.032 |
| HUMO | 2007 | 77 | 2 | 20 | 34.073 | P | 0.200 | -1.517 |
| L02A | 2007 | 77 | 2 | 20 | 35.969 | P | 0.200 | -0.937 |
| I04A | 2007 | 77 | 2 | 20 | 36.411 | P | 0.200 | -1.167 |
| J03A | 2007 | 77 | 2 | 20 | 37.197 | P | 0.200 | -1.189 |
| K02A | 2007 | 77 | 2 | 20 | 37.652 | P | 0.200 | -1.049 |
| DBO  | 2007 | 77 | 2 | 20 | 37.799 | P | 0.200 | -0.987 |
| M01C | 2007 | 77 | 2 | 20 | 37.877 | P | 0.200 | -0.307 |
| J02A | 2007 | 77 | 2 | 20 | 40.507 | P | 0.200 | -0.561 |
| I03A | 2007 | 77 | 2 | 20 | 41.013 | P | 0.200 | -1.071 |
| K01A | 2007 | 77 | 2 | 20 | 43.275 | P | 0.200 | 0.099  |

|      |      |     |    |         |           |           |          |        |       |
|------|------|-----|----|---------|-----------|-----------|----------|--------|-------|
| 1988 | 210  | 17  | 12 | 35.2100 | -22.35700 | -65.80500 | 286.0000 | 415    | 0.000 |
| bmd  | 1988 | 210 | 17 | 23      | 53.350    | P         | 0.200    | 0.098  |       |
| jhn  | 1988 | 210 | 17 | 23      | 54.500    | P         | 0.200    | 0.363  |       |
| mnk  | 1988 | 210 | 17 | 23      | 56.150    | P         | 0.200    | -0.203 |       |
| ndl  | 1988 | 210 | 17 | 23      | 54.690    | P         | 0.200    | 0.171  |       |
| pmt  | 1988 | 210 | 17 | 23      | 53.360    | P         | 0.200    | 0.188  |       |
| WMD  | 1988 | 210 | 17 | 23      | 55.430    | P         | 0.200    | 0.162  |       |
| bar  | 1988 | 210 | 17 | 23      | 56.150    | P         | 0.200    | -0.087 |       |
| jun  | 1988 | 210 | 17 | 23      | 55.920    | P         | 0.200    | -0.106 |       |
| twr  | 1988 | 210 | 17 | 23      | 55.170    | P         | 0.200    | 0.043  |       |
| wil  | 1988 | 210 | 17 | 23      | 54.970    | P         | 0.200    | 0.242  |       |
| CLC  | 1988 | 210 | 17 | 23      | 49.900    | P         | 0.200    | -0.249 |       |
| LRM  | 1988 | 210 | 17 | 23      | 49.250    | P         | 0.200    | -0.046 |       |
| TEJ  | 1988 | 210 | 17 | 23      | 52.040    | P         | 0.200    | 0.294  |       |

|     |      |     |    |    |        |   |       |        |
|-----|------|-----|----|----|--------|---|-------|--------|
| TOW | 1988 | 210 | 17 | 23 | 50.880 | P | 0.200 | 0.200  |
| WCH | 1988 | 210 | 17 | 23 | 52.340 | P | 0.200 | -0.038 |
| WCS | 1988 | 210 | 17 | 23 | 51.460 | P | 0.200 | -0.121 |
| WCX | 1988 | 210 | 17 | 23 | 49.520 | P | 0.200 | -0.226 |
| WHS | 1988 | 210 | 17 | 23 | 51.910 | P | 0.200 | -0.044 |
| WLH | 1988 | 210 | 17 | 23 | 54.400 | P | 0.200 | 0.192  |
| WOF | 1988 | 210 | 17 | 23 | 53.230 | P | 0.200 | 0.073  |
| WRC | 1988 | 210 | 17 | 23 | 50.700 | P | 0.200 | -0.265 |
| WSC | 1988 | 210 | 17 | 23 | 50.580 | P | 0.200 | -0.144 |
| WVP | 1988 | 210 | 17 | 23 | 51.480 | P | 0.200 | -0.122 |
| XMS | 1988 | 210 | 17 | 23 | 48.650 | P | 0.200 | 0.269  |
| BLK | 1988 | 210 | 17 | 23 | 45.490 | P | 0.200 | -0.687 |
| BMT | 1988 | 210 | 17 | 23 | 51.290 | P | 0.200 | -0.032 |
| CAL | 1988 | 210 | 17 | 23 | 48.570 | P | 0.200 | -0.331 |
| DTP | 1988 | 210 | 17 | 23 | 49.090 | P | 0.200 | 0.033  |
| JAW | 1988 | 210 | 17 | 23 | 49.850 | P | 0.200 | -0.066 |
| JFS | 1988 | 210 | 17 | 23 | 48.950 | P | 0.200 | 0.108  |
| SBK | 1988 | 210 | 17 | 23 | 47.490 | P | 0.200 | 0.012  |
| WHV | 1988 | 210 | 17 | 23 | 52.510 | P | 0.200 | 0.255  |
| WJP | 1988 | 210 | 17 | 23 | 52.020 | P | 0.200 | 0.065  |

|      |     |    |    |         |           |           |         |     |        |
|------|-----|----|----|---------|-----------|-----------|---------|-----|--------|
| 1988 | 227 | 17 | 53 | 12.3877 | -27.29800 | -71.03200 | 39.0000 | 427 | -0.006 |
|------|-----|----|----|---------|-----------|-----------|---------|-----|--------|

|     |      |     |    |   |        |   |       |        |
|-----|------|-----|----|---|--------|---|-------|--------|
| arc | 1988 | 227 | 18 | 5 | 2.460  | P | 0.200 | 0.133  |
| bkr | 1988 | 227 | 18 | 5 | 1.800  | P | 0.200 | -0.355 |
| ccr | 1988 | 227 | 18 | 5 | 5.850  | P | 0.200 | -0.238 |
| cdg | 1988 | 227 | 18 | 5 | 6.250  | P | 0.200 | -0.136 |
| jhn | 1988 | 227 | 18 | 5 | 2.900  | P | 0.200 | 0.249  |
| mnk | 1988 | 227 | 18 | 5 | 4.820  | P | 0.200 | -0.287 |
| ndl | 1988 | 227 | 18 | 5 | 3.160  | P | 0.200 | 0.030  |
| pmt | 1988 | 227 | 18 | 5 | 1.980  | P | 0.200 | 0.133  |
| WMD | 1988 | 227 | 18 | 5 | 3.980  | P | 0.200 | 0.087  |
| cou | 1988 | 227 | 18 | 5 | 3.880  | P | 0.200 | 0.089  |
| jun | 1988 | 227 | 18 | 5 | 4.730  | P | 0.200 | -0.179 |
| twr | 1988 | 227 | 18 | 5 | 3.900  | P | 0.200 | 0.009  |
| wil | 1988 | 227 | 18 | 5 | 3.530  | P | 0.200 | 0.095  |
| BLK | 1988 | 227 | 18 | 4 | 55.160 | P | 0.200 | 0.384  |
| BMT | 1988 | 227 | 18 | 4 | 59.310 | P | 0.200 | -0.102 |
| CAL | 1988 | 227 | 18 | 4 | 56.880 | P | 0.200 | -0.339 |
| DTP | 1988 | 227 | 18 | 4 | 57.470 | P | 0.200 | -0.005 |
| FLS | 1988 | 227 | 18 | 4 | 53.940 | P | 0.200 | 0.126  |
| GSC | 1988 | 227 | 18 | 4 | 54.690 | P | 0.200 | 0.145  |
| HOD | 1988 | 227 | 18 | 4 | 53.800 | P | 0.200 | -0.024 |
| JAW | 1988 | 227 | 18 | 4 | 58.200 | P | 0.200 | -0.095 |
| JFS | 1988 | 227 | 18 | 4 | 57.410 | P | 0.200 | 0.038  |
| SBK | 1988 | 227 | 18 | 4 | 55.870 | P | 0.200 | -0.044 |
| WHV | 1988 | 227 | 18 | 5 | 0.690  | P | 0.200 | 0.136  |
| WJP | 1988 | 227 | 18 | 5 | 0.180  | P | 0.200 | -0.022 |
| LRM | 1988 | 227 | 18 | 4 | 57.860 | P | 0.200 | -0.016 |
| TOW | 1988 | 227 | 18 | 4 | 59.660 | P | 0.200 | 0.253  |
| WBM | 1988 | 227 | 18 | 4 | 59.060 | P | 0.200 | 0.067  |
| WSC | 1988 | 227 | 18 | 4 | 59.220 | P | 0.200 | -0.130 |

|      |     |    |   |         |          |           |         |     |       |
|------|-----|----|---|---------|----------|-----------|---------|-----|-------|
| 1988 | 253 | 23 | 7 | 50.8432 | -7.08500 | -81.42500 | 36.0000 | 440 | 0.000 |
|------|-----|----|---|---------|----------|-----------|---------|-----|-------|

|     |      |     |    |    |        |   |       |        |
|-----|------|-----|----|----|--------|---|-------|--------|
| arc | 1988 | 253 | 23 | 17 | 19.910 | P | 0.200 | -0.033 |
| bkr | 1988 | 253 | 23 | 17 | 20.110 | P | 0.200 | 0.251  |
| bmd | 1988 | 253 | 23 | 17 | 19.300 | P | 0.200 | 0.030  |
| ccr | 1988 | 253 | 23 | 17 | 24.500 | P | 0.200 | -0.135 |
| jhn | 1988 | 253 | 23 | 17 | 20.560 | P | 0.200 | 0.119  |
| mnk | 1988 | 253 | 23 | 17 | 23.250 | P | 0.200 | -0.087 |
| pmt | 1988 | 253 | 23 | 17 | 19.270 | P | 0.200 | -0.043 |
| WMD | 1988 | 253 | 23 | 17 | 22.000 | P | 0.200 | 0.091  |
| cou | 1988 | 253 | 23 | 17 | 21.790 | P | 0.200 | 0.187  |
| jun | 1988 | 253 | 23 | 17 | 23.240 | P | 0.200 | 0.173  |

|     |      |     |    |    |        |   |       |        |
|-----|------|-----|----|----|--------|---|-------|--------|
| twr | 1988 | 253 | 23 | 17 | 21.920 | P | 0.200 | 0.063  |
| ARV | 1988 | 253 | 23 | 17 | 17.350 | P | 0.200 | -0.005 |
| BLK | 1988 | 253 | 23 | 17 | 9.599  | P | 0.200 | -0.697 |
| CAL | 1988 | 253 | 23 | 17 | 13.290 | P | 0.200 | -0.301 |
| CLC | 1988 | 253 | 23 | 17 | 15.290 | P | 0.200 | -0.237 |
| DTP | 1988 | 253 | 23 | 17 | 13.930 | P | 0.200 | 0.012  |
| ISA | 1988 | 253 | 23 | 17 | 18.710 | P | 0.200 | 0.067  |
| JAW | 1988 | 253 | 23 | 17 | 14.960 | P | 0.200 | -0.052 |
| JFS | 1988 | 253 | 23 | 17 | 13.810 | P | 0.200 | 0.139  |
| LRM | 1988 | 253 | 23 | 17 | 14.380 | P | 0.200 | 0.074  |
| SBK | 1988 | 253 | 23 | 17 | 12.230 | P | 0.200 | 0.388  |
| SRT | 1988 | 253 | 23 | 17 | 15.740 | P | 0.200 | 0.172  |
| TEJ | 1988 | 253 | 23 | 17 | 17.480 | P | 0.200 | 0.186  |
| TOW | 1988 | 253 | 23 | 17 | 16.420 | P | 0.200 | 0.236  |
| WBM | 1988 | 253 | 23 | 17 | 15.810 | P | 0.200 | 0.053  |
| WCS | 1988 | 253 | 23 | 17 | 17.150 | P | 0.200 | -0.226 |
| WJP | 1988 | 253 | 23 | 17 | 17.540 | P | 0.200 | 0.044  |
| WRC | 1988 | 253 | 23 | 17 | 16.260 | P | 0.200 | -0.282 |
| WSC | 1988 | 253 | 23 | 17 | 15.980 | P | 0.200 | -0.211 |
| WVP | 1988 | 253 | 23 | 17 | 17.130 | P | 0.200 | -0.185 |
| XMS | 1988 | 253 | 23 | 17 | 13.350 | P | 0.200 | 0.213  |

|      |      |     |    |         |          |           |         |        |       |
|------|------|-----|----|---------|----------|-----------|---------|--------|-------|
| 2005 | 295  | 20  | 34 | 40.6997 | -0.85800 | -90.95200 | 10.0000 | 29     | 0.022 |
| HEC  | 2005 | 295 | 20 | 42      | 38.494   | P         | 0.200   | 0.503  |       |
| BFS  | 2005 | 295 | 20 | 42      | 40.221   | P         | 0.200   | 0.084  |       |
| TUQ  | 2005 | 295 | 20 | 42      | 40.384   | P         | 0.200   | 0.251  |       |
| GSC  | 2005 | 295 | 20 | 42      | 43.374   | P         | 0.200   | 0.458  |       |
| SHO  | 2005 | 295 | 20 | 42      | 44.700   | P         | 0.200   | 0.374  |       |
| EDW2 | 2005 | 295 | 20 | 42      | 45.290   | P         | 0.200   | -0.137 |       |
| OSI  | 2005 | 295 | 20 | 42      | 47.038   | P         | 0.200   | 0.062  |       |
| LRL  | 2005 | 295 | 20 | 42      | 48.151   | P         | 0.200   | 0.426  |       |
| FUR  | 2005 | 295 | 20 | 42      | 50.635   | P         | 0.200   | 0.393  |       |
| MPM  | 2005 | 295 | 20 | 42      | 50.746   | P         | 0.200   | 0.169  |       |
| ARV  | 2005 | 295 | 20 | 42      | 50.807   | P         | 0.200   | 0.424  |       |
| TPNV | 2005 | 295 | 20 | 42      | 51.788   | P         | 0.200   | 0.832  |       |
| ISA  | 2005 | 295 | 20 | 42      | 52.726   | P         | 0.200   | 0.506  |       |
| MPP  | 2005 | 295 | 20 | 42      | 53.558   | P         | 0.200   | -0.041 |       |
| CWC  | 2005 | 295 | 20 | 42      | 55.774   | P         | 0.200   | 0.515  |       |
| VES  | 2005 | 295 | 20 | 42      | 55.953   | P         | 0.200   | 0.172  |       |
| GRA  | 2005 | 295 | 20 | 42      | 56.239   | P         | 0.200   | 0.583  |       |
| SMM  | 2005 | 295 | 20 | 42      | 57.040   | P         | 0.200   | 0.294  |       |
| TIN  | 2005 | 295 | 20 | 43      | 0.021    | P         | 0.200   | 0.513  |       |
| RAMR | 2005 | 295 | 20 | 43      | 2.520    | P         | 0.200   | 0.003  |       |
| PKD  | 2005 | 295 | 20 | 43      | 2.585    | P         | 0.200   | -0.222 |       |
| S08C | 2005 | 295 | 20 | 43      | 2.689    | P         | 0.200   | 0.427  |       |
| SN15 | 2005 | 295 | 20 | 43      | 2.923    | P         | 0.200   | 0.285  |       |
| SN25 | 2005 | 295 | 20 | 43      | 3.738    | P         | 0.200   | 0.253  |       |
| SN23 | 2005 | 295 | 20 | 43      | 3.863    | P         | 0.200   | -0.277 |       |
| T06C | 2005 | 295 | 20 | 43      | 3.980    | P         | 0.200   | -1.277 |       |
| SN28 | 2005 | 295 | 20 | 43      | 4.802    | P         | 0.200   | 0.318  |       |
| SN34 | 2005 | 295 | 20 | 43      | 5.134    | P         | 0.200   | 0.003  |       |
| SN36 | 2005 | 295 | 20 | 43      | 5.305    | P         | 0.200   | 0.035  |       |
| SN37 | 2005 | 295 | 20 | 43      | 5.757    | P         | 0.200   | 0.261  |       |
| SN43 | 2005 | 295 | 20 | 43      | 6.241    | P         | 0.200   | -0.802 |       |
| U04C | 2005 | 295 | 20 | 43      | 6.277    | P         | 0.200   | 0.081  |       |
| SN38 | 2005 | 295 | 20 | 43      | 6.514    | P         | 0.200   | 0.369  |       |
| SN52 | 2005 | 295 | 20 | 43      | 6.640    | P         | 0.200   | -1.124 |       |
| SN45 | 2005 | 295 | 20 | 43      | 7.105    | P         | 0.200   | 0.074  |       |
| SN51 | 2005 | 295 | 20 | 43      | 7.377    | P         | 0.200   | -0.884 |       |
| SN47 | 2005 | 295 | 20 | 43      | 7.521    | P         | 0.200   | 0.287  |       |
| SN48 | 2005 | 295 | 20 | 43      | 7.937    | P         | 0.200   | 0.278  |       |
| SN54 | 2005 | 295 | 20 | 43      | 8.864    | P         | 0.200   | -0.121 |       |
| SN62 | 2005 | 295 | 20 | 43      | 9.212    | P         | 0.200   | -0.776 |       |

|      |      |     |    |    |        |   |       |        |
|------|------|-----|----|----|--------|---|-------|--------|
| SN56 | 2005 | 295 | 20 | 43 | 9.441  | P | 0.200 | 0.343  |
| R07C | 2005 | 295 | 20 | 43 | 9.639  | P | 0.200 | 0.483  |
| SN57 | 2005 | 295 | 20 | 43 | 9.645  | P | 0.200 | 0.390  |
| SN64 | 2005 | 295 | 20 | 43 | 10.274 | P | 0.200 | -0.118 |
| S06C | 2005 | 295 | 20 | 43 | 10.942 | P | 0.200 | -0.195 |
| SN73 | 2005 | 295 | 20 | 43 | 11.374 | P | 0.200 | -0.517 |
| SN66 | 2005 | 295 | 20 | 43 | 11.405 | P | 0.200 | 0.403  |
| SN71 | 2005 | 295 | 20 | 43 | 11.426 | P | 0.200 | -0.467 |
| SN74 | 2005 | 295 | 20 | 43 | 11.888 | P | 0.200 | -0.276 |
| PACP | 2005 | 295 | 20 | 43 | 12.124 | P | 0.200 | 0.023  |
| SN76 | 2005 | 295 | 20 | 43 | 13.121 | P | 0.200 | 0.393  |
| R06C | 2005 | 295 | 20 | 43 | 13.774 | P | 0.200 | 0.381  |
| CMB  | 2005 | 295 | 20 | 43 | 13.779 | P | 0.200 | -0.419 |
| SN84 | 2005 | 295 | 20 | 43 | 13.858 | P | 0.200 | -0.168 |
| SN85 | 2005 | 295 | 20 | 43 | 14.131 | P | 0.200 | 0.067  |
| S04C | 2005 | 295 | 20 | 43 | 14.961 | P | 0.200 | 0.017  |
| SN86 | 2005 | 295 | 20 | 43 | 15.013 | P | 0.200 | 0.231  |
| SN95 | 2005 | 295 | 20 | 43 | 15.369 | P | 0.200 | -0.168 |
| MHC  | 2005 | 295 | 20 | 43 | 15.878 | P | 0.200 | 0.314  |
| R05C | 2005 | 295 | 20 | 43 | 17.315 | P | 0.200 | 0.224  |
| R04C | 2005 | 295 | 20 | 43 | 18.165 | P | 0.200 | 0.572  |
| LAVA | 2005 | 295 | 20 | 43 | 19.627 | P | 0.200 | -0.142 |
| P05C | 2005 | 295 | 20 | 43 | 22.665 | P | 0.200 | 0.220  |
| ORV  | 2005 | 295 | 20 | 43 | 27.389 | P | 0.200 | 0.185  |
| O05C | 2005 | 295 | 20 | 43 | 27.580 | P | 0.200 | 0.180  |
| MNRC | 2005 | 295 | 20 | 43 | 27.612 | P | 0.200 | 0.256  |
| O04C | 2005 | 295 | 20 | 43 | 29.937 | P | 0.200 | -0.203 |
| ELFS | 2005 | 295 | 20 | 43 | 30.590 | P | 0.200 | 0.030  |
| O03C | 2005 | 295 | 20 | 43 | 31.242 | P | 0.200 | -0.641 |
| M06C | 2005 | 295 | 20 | 43 | 32.605 | P | 0.200 | -0.250 |
| GASB | 2005 | 295 | 20 | 43 | 33.218 | P | 0.200 | 0.366  |
| P01C | 2005 | 295 | 20 | 43 | 34.478 | P | 0.200 | 0.121  |
| M03C | 2005 | 295 | 20 | 43 | 37.958 | P | 0.200 | -1.508 |
| M04C | 2005 | 295 | 20 | 43 | 40.460 | P | 0.200 | -0.875 |
| N02C | 2005 | 295 | 20 | 43 | 40.821 | P | 0.200 | -0.778 |
| YBH  | 2005 | 295 | 20 | 43 | 42.236 | P | 0.200 | -2.047 |

|      |      |     |    |         |           |           |          |        |       |
|------|------|-----|----|---------|-----------|-----------|----------|--------|-------|
| 2005 | 226  | 2   | 39 | 41.3723 | -19.78000 | -68.98000 | 113.8000 | 12     | 0.001 |
| HEC  | 2005 | 226 | 2  | 50      | 44.318    | P         | 0.200    | 0.287  |       |
| BBR  | 2005 | 226 | 2  | 50      | 44.499    | P         | 0.200    | 0.541  |       |
| TUQ  | 2005 | 226 | 2  | 50      | 45.139    | P         | 0.200    | 0.122  |       |
| CIA  | 2005 | 226 | 2  | 50      | 46.107    | P         | 0.200    | 0.127  |       |
| BFS  | 2005 | 226 | 2  | 50      | 46.546    | P         | 0.200    | -0.065 |       |
| FMP  | 2005 | 226 | 2  | 50      | 46.782    | P         | 0.200    | -0.036 |       |
| RRX  | 2005 | 226 | 2  | 50      | 46.924    | P         | 0.200    | 0.279  |       |
| GSC  | 2005 | 226 | 2  | 50      | 47.964    | P         | 0.200    | 0.240  |       |
| SHO  | 2005 | 226 | 2  | 50      | 48.159    | P         | 0.200    | 0.152  |       |
| DEC  | 2005 | 226 | 2  | 50      | 49.122    | P         | 0.200    | 0.100  |       |
| EDW2 | 2005 | 226 | 2  | 50      | 50.051    | P         | 0.200    | -0.267 |       |
| LGU  | 2005 | 226 | 2  | 50      | 51.094    | P         | 0.200    | -0.098 |       |
| OSI  | 2005 | 226 | 2  | 50      | 51.691    | P         | 0.200    | -0.272 |       |
| LRL  | 2005 | 226 | 2  | 50      | 51.699    | P         | 0.200    | 0.147  |       |
| SCZ2 | 2005 | 226 | 2  | 50      | 52.650    | P         | 0.200    | -0.241 |       |
| FUR  | 2005 | 226 | 2  | 50      | 52.802    | P         | 0.200    | 0.427  |       |
| MPM  | 2005 | 226 | 2  | 50      | 53.118    | P         | 0.200    | -0.186 |       |
| ARV  | 2005 | 226 | 2  | 50      | 54.435    | P         | 0.200    | 0.266  |       |
| SBC  | 2005 | 226 | 2  | 50      | 54.807    | P         | 0.200    | -0.055 |       |
| ISA  | 2005 | 226 | 2  | 50      | 55.385    | P         | 0.200    | 0.202  |       |
| GRA  | 2005 | 226 | 2  | 50      | 56.989    | P         | 0.200    | 0.568  |       |
| CWC  | 2005 | 226 | 2  | 50      | 57.183    | P         | 0.200    | 0.332  |       |
| MPP  | 2005 | 226 | 2  | 50      | 57.284    | P         | 0.200    | 0.142  |       |
| VES  | 2005 | 226 | 2  | 50      | 57.931    | P         | 0.200    | -0.033 |       |
| SDP  | 2005 | 226 | 2  | 50      | 58.316    | P         | 0.200    | -0.044 |       |

|      |      |     |   |    |        |   |       |        |
|------|------|-----|---|----|--------|---|-------|--------|
| RCT  | 2005 | 226 | 2 | 50 | 59.491 | P | 0.200 | -0.841 |
| SMM  | 2005 | 226 | 2 | 50 | 59.673 | P | 0.200 | 0.353  |
| TIN  | 2005 | 226 | 2 | 51 | 0.076  | P | 0.200 | 0.426  |
| TPH  | 2005 | 226 | 2 | 51 | 0.457  | P | 0.200 | 0.201  |
| SN11 | 2005 | 226 | 2 | 51 | 0.795  | P | 0.200 | -1.136 |
| SN16 | 2005 | 226 | 2 | 51 | 1.173  | P | 0.200 | 0.134  |
| V05C | 2005 | 226 | 2 | 51 | 1.381  | P | 0.200 | 0.259  |
| S08C | 2005 | 226 | 2 | 51 | 1.716  | P | 0.200 | 0.242  |
| SN15 | 2005 | 226 | 2 | 51 | 2.284  | P | 0.200 | 0.173  |
| SN22 | 2005 | 226 | 2 | 51 | 2.506  | P | 0.200 | -1.008 |
| SN26 | 2005 | 226 | 2 | 51 | 2.789  | P | 0.200 | 0.068  |
| SN25 | 2005 | 226 | 2 | 51 | 2.814  | P | 0.200 | 0.125  |
| SN23 | 2005 | 226 | 2 | 51 | 3.127  | P | 0.200 | -0.445 |
| SN28 | 2005 | 226 | 2 | 51 | 3.224  | P | 0.200 | 0.350  |
| U05C | 2005 | 226 | 2 | 51 | 3.285  | P | 0.200 | -0.233 |
| SN24 | 2005 | 226 | 2 | 51 | 3.288  | P | 0.200 | -0.035 |
| T06C | 2005 | 226 | 2 | 51 | 3.466  | P | 0.200 | -1.117 |
| PKD  | 2005 | 226 | 2 | 51 | 3.533  | P | 0.200 | -0.184 |
| SN36 | 2005 | 226 | 2 | 51 | 3.870  | P | 0.200 | 0.040  |
| RAMR | 2005 | 226 | 2 | 51 | 3.972  | P | 0.200 | 0.149  |
| V04C | 2005 | 226 | 2 | 51 | 3.972  | P | 0.200 | 0.146  |
| SN37 | 2005 | 226 | 2 | 51 | 4.141  | P | 0.200 | 0.335  |
| SN42 | 2005 | 226 | 2 | 51 | 4.268  | P | 0.200 | -0.985 |
| SN38 | 2005 | 226 | 2 | 51 | 4.395  | P | 0.200 | 0.350  |
| SN43 | 2005 | 226 | 2 | 51 | 5.025  | P | 0.200 | -0.612 |
| SN44 | 2005 | 226 | 2 | 51 | 5.047  | P | 0.200 | -0.207 |
| SN45 | 2005 | 226 | 2 | 51 | 5.367  | P | 0.200 | -0.040 |
| SN46 | 2005 | 226 | 2 | 51 | 5.433  | P | 0.200 | 0.312  |
| SN47 | 2005 | 226 | 2 | 51 | 5.500  | P | 0.200 | 0.421  |
| SN48 | 2005 | 226 | 2 | 51 | 5.502  | P | 0.200 | 0.291  |
| SN52 | 2005 | 226 | 2 | 51 | 5.557  | P | 0.200 | -0.751 |
| U04C | 2005 | 226 | 2 | 51 | 6.255  | P | 0.200 | 0.226  |
| SN53 | 2005 | 226 | 2 | 51 | 6.268  | P | 0.200 | -0.265 |
| SN51 | 2005 | 226 | 2 | 51 | 6.517  | P | 0.200 | -0.321 |
| V03C | 2005 | 226 | 2 | 51 | 6.922  | P | 0.200 | 0.484  |
| SN57 | 2005 | 226 | 2 | 51 | 7.039  | P | 0.200 | 0.413  |
| R07C | 2005 | 226 | 2 | 51 | 7.053  | P | 0.200 | 0.469  |
| SN56 | 2005 | 226 | 2 | 51 | 7.130  | P | 0.200 | 0.397  |
| SN62 | 2005 | 226 | 2 | 51 | 7.492  | P | 0.200 | -0.383 |
| SN63 | 2005 | 226 | 2 | 51 | 7.814  | P | 0.200 | -0.088 |
| T05C | 2005 | 226 | 2 | 51 | 7.993  | P | 0.200 | 0.425  |
| S05C | 2005 | 226 | 2 | 51 | 8.214  | P | 0.200 | 0.191  |
| SN67 | 2005 | 226 | 2 | 51 | 8.238  | P | 0.200 | 0.529  |
| SN66 | 2005 | 226 | 2 | 51 | 8.553  | P | 0.200 | 0.487  |
| HAST | 2005 | 226 | 2 | 51 | 9.002  | P | 0.200 | 0.032  |
| SN73 | 2005 | 226 | 2 | 51 | 9.044  | P | 0.200 | -0.186 |
| BMN  | 2005 | 226 | 2 | 51 | 9.156  | P | 0.200 | -0.334 |
| SN71 | 2005 | 226 | 2 | 51 | 9.176  | P | 0.200 | -0.244 |
| SN74 | 2005 | 226 | 2 | 51 | 9.234  | P | 0.200 | -0.040 |
| SN76 | 2005 | 226 | 2 | 51 | 9.729  | P | 0.200 | 0.394  |
| SN84 | 2005 | 226 | 2 | 51 | 10.509 | P | 0.200 | -0.143 |
| PACP | 2005 | 226 | 2 | 51 | 10.573 | P | 0.200 | 0.304  |
| SN85 | 2005 | 226 | 2 | 51 | 10.683 | P | 0.200 | 0.139  |
| CMB  | 2005 | 226 | 2 | 51 | 10.727 | P | 0.200 | -0.241 |
| SN86 | 2005 | 226 | 2 | 51 | 11.366 | P | 0.200 | 0.445  |
| SN95 | 2005 | 226 | 2 | 51 | 11.631 | P | 0.200 | -0.154 |
| S04C | 2005 | 226 | 2 | 51 | 12.231 | P | 0.200 | 0.161  |
| R05C | 2005 | 226 | 2 | 51 | 12.960 | P | 0.200 | 0.310  |
| MHC  | 2005 | 226 | 2 | 51 | 13.137 | P | 0.200 | 0.309  |
| BNLO | 2005 | 226 | 2 | 51 | 13.842 | P | 0.200 | -0.143 |
| R04C | 2005 | 226 | 2 | 51 | 13.931 | P | 0.200 | 0.483  |
| LAVA | 2005 | 226 | 2 | 51 | 14.542 | P | 0.200 | -0.217 |
| WENL | 2005 | 226 | 2 | 51 | 14.600 | P | 0.200 | 0.630  |

|      |      |     |   |    |        |   |       |        |
|------|------|-----|---|----|--------|---|-------|--------|
| JRSC | 2005 | 226 | 2 | 51 | 14.947 | P | 0.200 | 0.048  |
| BRK  | 2005 | 226 | 2 | 51 | 16.700 | P | 0.200 | 0.082  |
| BRIB | 2005 | 226 | 2 | 51 | 16.734 | P | 0.200 | 0.186  |
| P05C | 2005 | 226 | 2 | 51 | 16.815 | P | 0.200 | 0.444  |
| BKS  | 2005 | 226 | 2 | 51 | 16.822 | P | 0.200 | 0.131  |
| Q04C | 2005 | 226 | 2 | 51 | 17.547 | P | 0.200 | 0.405  |
| FARB | 2005 | 226 | 2 | 51 | 18.400 | P | 0.200 | -0.332 |
| CVS  | 2005 | 226 | 2 | 51 | 18.854 | P | 0.200 | -0.245 |
| Q03C | 2005 | 226 | 2 | 51 | 19.315 | P | 0.200 | 0.707  |
| SUTB | 2005 | 226 | 2 | 51 | 19.625 | P | 0.200 | -0.306 |
| O05C | 2005 | 226 | 2 | 51 | 19.999 | P | 0.200 | 0.293  |
| ORV  | 2005 | 226 | 2 | 51 | 20.343 | P | 0.200 | 0.336  |
| MNRC | 2005 | 226 | 2 | 51 | 21.086 | P | 0.200 | 0.206  |
| O04C | 2005 | 226 | 2 | 51 | 21.447 | P | 0.200 | -0.176 |
| ELFS | 2005 | 226 | 2 | 51 | 21.725 | P | 0.200 | 0.074  |
| O03C | 2005 | 226 | 2 | 51 | 22.475 | P | 0.200 | -0.956 |
| M06C | 2005 | 226 | 2 | 51 | 22.916 | P | 0.200 | 0.134  |
| HOPS | 2005 | 226 | 2 | 51 | 23.713 | P | 0.200 | 0.351  |
| HATC | 2005 | 226 | 2 | 51 | 24.242 | P | 0.200 | -0.381 |
| WDC  | 2005 | 226 | 2 | 51 | 25.435 | P | 0.200 | -1.802 |
| M05C | 2005 | 226 | 2 | 51 | 25.437 | P | 0.200 | -0.066 |
| M03C | 2005 | 226 | 2 | 51 | 27.475 | P | 0.200 | -0.877 |
| M02C | 2005 | 226 | 2 | 51 | 30.356 | P | 0.200 | -0.761 |
| YBH  | 2005 | 226 | 2 | 51 | 30.478 | P | 0.200 | -1.313 |
| N02C | 2005 | 226 | 2 | 51 | 30.491 | P | 0.200 | -0.170 |
| JCC  | 2005 | 226 | 2 | 51 | 33.060 | P | 0.200 | 0.242  |
| DBO  | 2005 | 226 | 2 | 51 | 38.219 | P | 0.200 | 0.155  |
| TAKO | 2005 | 226 | 2 | 51 | 42.728 | P | 0.200 | 0.099  |

|      |      |     |    |        |           |           |          |        |       |
|------|------|-----|----|--------|-----------|-----------|----------|--------|-------|
| 2005 | 252  | 11  | 26 | 7.6741 | -31.68000 | -69.13600 | 112.6000 | 19     | 0.007 |
| BBR  | 2005 | 252 | 11 | 38     | 2.777     | P         | 0.200    | 0.594  |       |
| CIA  | 2005 | 252 | 11 | 38     | 3.073     | P         | 0.200    | 0.249  |       |
| HEC  | 2005 | 252 | 11 | 38     | 3.125     | P         | 0.200    | 0.318  |       |
| FMP  | 2005 | 252 | 11 | 38     | 3.933     | P         | 0.200    | 0.111  |       |
| BFS  | 2005 | 252 | 11 | 38     | 4.140     | P         | 0.200    | -0.052 |       |
| TUQ  | 2005 | 252 | 11 | 38     | 4.358     | P         | 0.200    | 0.227  |       |
| RRX  | 2005 | 252 | 11 | 38     | 5.120     | P         | 0.200    | 0.272  |       |
| DEC  | 2005 | 252 | 11 | 38     | 6.189     | P         | 0.200    | 0.174  |       |
| GSC  | 2005 | 252 | 11 | 38     | 6.289     | P         | 0.200    | 0.171  |       |
| SHO  | 2005 | 252 | 11 | 38     | 6.790     | P         | 0.200    | -0.056 |       |
| EDW2 | 2005 | 252 | 11 | 38     | 7.354     | P         | 0.200    | -0.304 |       |
| LGU  | 2005 | 252 | 11 | 38     | 7.621     | P         | 0.200    | 0.066  |       |
| OSI  | 2005 | 252 | 11 | 38     | 8.607     | P         | 0.200    | -0.060 |       |
| SCZ2 | 2005 | 252 | 11 | 38     | 8.828     | P         | 0.200    | 0.101  |       |
| LRL  | 2005 | 252 | 11 | 38     | 9.296     | P         | 0.200    | 0.118  |       |
| MPM  | 2005 | 252 | 11 | 38     | 10.997    | P         | 0.200    | -0.148 |       |
| FUR  | 2005 | 252 | 11 | 38     | 11.102    | P         | 0.200    | 0.383  |       |
| ARV  | 2005 | 252 | 11 | 38     | 11.200    | P         | 0.200    | 0.390  |       |
| ISA  | 2005 | 252 | 11 | 38     | 12.481    | P         | 0.200    | 0.296  |       |
| MPP  | 2005 | 252 | 11 | 38     | 13.303    | P         | 0.200    | 0.353  |       |
| SDP  | 2005 | 252 | 11 | 38     | 13.822    | P         | 0.200    | 0.256  |       |
| CWC  | 2005 | 252 | 11 | 38     | 14.436    | P         | 0.200    | 0.219  |       |
| SMM  | 2005 | 252 | 11 | 38     | 15.529    | P         | 0.200    | 0.499  |       |
| SN11 | 2005 | 252 | 11 | 38     | 17.052    | P         | 0.200    | -1.226 |       |
| HELL | 2005 | 252 | 11 | 38     | 17.142    | P         | 0.200    | -0.472 |       |
| TIN  | 2005 | 252 | 11 | 38     | 17.170    | P         | 0.200    | 0.257  |       |
| V05C | 2005 | 252 | 11 | 38     | 17.307    | P         | 0.200    | 0.331  |       |
| SN16 | 2005 | 252 | 11 | 38     | 18.251    | P         | 0.200    | -0.034 |       |
| TPH  | 2005 | 252 | 11 | 38     | 18.301    | P         | 0.200    | -0.012 |       |
| SN22 | 2005 | 252 | 11 | 38     | 18.736    | P         | 0.200    | -1.126 |       |
| S08C | 2005 | 252 | 11 | 38     | 18.912    | P         | 0.200    | 0.139  |       |
| PKD  | 2005 | 252 | 11 | 38     | 19.039    | P         | 0.200    | -0.016 |       |
| SN15 | 2005 | 252 | 11 | 38     | 19.134    | P         | 0.200    | 0.024  |       |

|      |      |     |    |    |        |   |       |        |
|------|------|-----|----|----|--------|---|-------|--------|
| U05C | 2005 | 252 | 11 | 38 | 19.165 | P | 0.200 | -0.030 |
| RAMR | 2005 | 252 | 11 | 38 | 19.181 | P | 0.200 | 0.318  |
| V04C | 2005 | 252 | 11 | 38 | 19.181 | P | 0.200 | 0.315  |
| SN23 | 2005 | 252 | 11 | 38 | 19.329 | P | 0.200 | -0.710 |
| SN25 | 2005 | 252 | 11 | 38 | 19.531 | P | 0.200 | -0.050 |
| T06C | 2005 | 252 | 11 | 38 | 19.614 | P | 0.200 | -1.028 |
| SN24 | 2005 | 252 | 11 | 38 | 19.688 | P | 0.200 | -0.289 |
| SN26 | 2005 | 252 | 11 | 38 | 19.782 | P | 0.200 | 0.007  |
| SN28 | 2005 | 252 | 11 | 38 | 20.330 | P | 0.200 | 0.123  |
| SN42 | 2005 | 252 | 11 | 38 | 20.480 | P | 0.200 | -0.970 |
| SN36 | 2005 | 252 | 11 | 38 | 20.586 | P | 0.200 | -0.177 |
| SN37 | 2005 | 252 | 11 | 38 | 20.938 | P | 0.200 | 0.106  |
| SN44 | 2005 | 252 | 11 | 38 | 21.255 | P | 0.200 | -0.422 |
| SN43 | 2005 | 252 | 11 | 38 | 21.317 | P | 0.200 | -0.574 |
| SN38 | 2005 | 252 | 11 | 38 | 21.345 | P | 0.200 | 0.142  |
| U04C | 2005 | 252 | 11 | 38 | 21.695 | P | 0.200 | 0.540  |
| SN52 | 2005 | 252 | 11 | 38 | 21.732 | P | 0.200 | -0.559 |
| SN45 | 2005 | 252 | 11 | 38 | 21.886 | P | 0.200 | -0.140 |
| V03C | 2005 | 252 | 11 | 38 | 21.914 | P | 0.200 | 0.750  |
| SN46 | 2005 | 252 | 11 | 38 | 22.047 | P | 0.200 | 0.193  |
| SN47 | 2005 | 252 | 11 | 38 | 22.252 | P | 0.200 | 0.299  |
| SN53 | 2005 | 252 | 11 | 38 | 22.361 | P | 0.200 | -0.275 |
| SN48 | 2005 | 252 | 11 | 38 | 22.388 | P | 0.200 | 0.162  |
| SN51 | 2005 | 252 | 11 | 38 | 22.544 | P | 0.200 | -0.110 |
| SN62 | 2005 | 252 | 11 | 38 | 23.373 | P | 0.200 | -0.345 |
| SN56 | 2005 | 252 | 11 | 38 | 23.483 | P | 0.200 | 0.231  |
| R07C | 2005 | 252 | 11 | 38 | 23.553 | P | 0.200 | 0.350  |
| SN57 | 2005 | 252 | 11 | 38 | 23.602 | P | 0.200 | 0.300  |
| HAST | 2005 | 252 | 11 | 38 | 23.768 | P | 0.200 | 0.281  |
| S05C | 2005 | 252 | 11 | 38 | 23.776 | P | 0.200 | 0.172  |
| SN63 | 2005 | 252 | 11 | 38 | 23.807 | P | 0.200 | -0.101 |
| SN67 | 2005 | 252 | 11 | 38 | 24.608 | P | 0.200 | 0.373  |
| SN71 | 2005 | 252 | 11 | 38 | 24.639 | P | 0.200 | -0.310 |
| SN73 | 2005 | 252 | 11 | 38 | 24.745 | P | 0.200 | -0.247 |
| SN66 | 2005 | 252 | 11 | 38 | 24.821 | P | 0.200 | 0.370  |
| SAO  | 2005 | 252 | 11 | 38 | 24.825 | P | 0.200 | 0.250  |
| SN74 | 2005 | 252 | 11 | 38 | 25.032 | P | 0.200 | -0.157 |
| PACP | 2005 | 252 | 11 | 38 | 25.548 | P | 0.200 | 0.496  |
| CMB  | 2005 | 252 | 11 | 38 | 26.166 | P | 0.200 | -0.374 |
| SN84 | 2005 | 252 | 11 | 38 | 26.190 | P | 0.200 | -0.202 |
| SN85 | 2005 | 252 | 11 | 38 | 26.419 | P | 0.200 | -0.022 |
| R06C | 2005 | 252 | 11 | 38 | 26.458 | P | 0.200 | 0.489  |
| SN95 | 2005 | 252 | 11 | 38 | 27.132 | P | 0.200 | -0.325 |
| S04C | 2005 | 252 | 11 | 38 | 27.151 | P | 0.200 | 0.300  |
| SN86 | 2005 | 252 | 11 | 38 | 27.219 | P | 0.200 | 0.279  |
| MHC  | 2005 | 252 | 11 | 38 | 27.797 | P | 0.200 | 0.447  |
| BNLO | 2005 | 252 | 11 | 38 | 28.163 | P | 0.200 | 0.079  |
| R05C | 2005 | 252 | 11 | 38 | 28.554 | P | 0.200 | 0.076  |
| R04C | 2005 | 252 | 11 | 38 | 28.942 | P | 0.200 | 0.389  |
| WENL | 2005 | 252 | 11 | 38 | 29.086 | P | 0.200 | 0.682  |
| JRSC | 2005 | 252 | 11 | 38 | 29.236 | P | 0.200 | 0.298  |
| LAVA | 2005 | 252 | 11 | 38 | 29.719 | P | 0.200 | -0.340 |
| BDM  | 2005 | 252 | 11 | 38 | 30.689 | P | 0.200 | 0.634  |
| BRK  | 2005 | 252 | 11 | 38 | 31.002 | P | 0.200 | 0.323  |
| BRIB | 2005 | 252 | 11 | 38 | 31.125 | P | 0.200 | 0.392  |
| BKS  | 2005 | 252 | 11 | 38 | 31.144 | P | 0.200 | 0.372  |
| P05C | 2005 | 252 | 11 | 38 | 31.999 | P | 0.200 | 0.244  |
| FARB | 2005 | 252 | 11 | 38 | 32.106 | P | 0.200 | -0.082 |
| Q04C | 2005 | 252 | 11 | 38 | 32.282 | P | 0.200 | 0.344  |
| CVS  | 2005 | 252 | 11 | 38 | 32.929 | P | 0.200 | -0.104 |
| Q03C | 2005 | 252 | 11 | 38 | 33.648 | P | 0.200 | 0.737  |
| SUTB | 2005 | 252 | 11 | 38 | 34.006 | P | 0.200 | -0.424 |
| O05C | 2005 | 252 | 11 | 38 | 34.898 | P | 0.200 | 0.025  |



|      |      |     |    |    |        |   |       |        |
|------|------|-----|----|----|--------|---|-------|--------|
| ORV  | 2005 | 252 | 11 | 38 | 34.998 | P | 0.200 | 0.261  |
| MNRC | 2005 | 252 | 11 | 38 | 35.200 | P | 0.200 | 0.340  |
| O04C | 2005 | 252 | 11 | 38 | 36.217 | P | 0.200 | -0.438 |
| ELFS | 2005 | 252 | 11 | 38 | 36.707 | P | 0.200 | -0.263 |
| O03C | 2005 | 252 | 11 | 38 | 36.833 | P | 0.200 | -0.933 |
| HOPS | 2005 | 252 | 11 | 38 | 37.349 | P | 0.200 | 0.486  |
| M06C | 2005 | 252 | 11 | 38 | 38.214 | P | 0.200 | -0.044 |
| HATC | 2005 | 252 | 11 | 38 | 38.870 | P | 0.200 | -0.515 |
| WDC  | 2005 | 252 | 11 | 38 | 39.645 | P | 0.200 | -1.530 |
| P01C | 2005 | 252 | 11 | 38 | 39.847 | P | 0.200 | 0.433  |
| M05C | 2005 | 252 | 11 | 38 | 40.175 | P | 0.200 | -0.288 |
| M03C | 2005 | 252 | 11 | 38 | 41.778 | P | 0.200 | -0.820 |
| M04C | 2005 | 252 | 11 | 38 | 43.314 | P | 0.200 | -0.446 |
| N02C | 2005 | 252 | 11 | 38 | 44.012 | P | 0.200 | -0.031 |
| M02C | 2005 | 252 | 11 | 38 | 44.356 | P | 0.200 | -0.444 |
| YBH  | 2005 | 252 | 11 | 38 | 44.424 | P | 0.200 | -1.140 |
| HUMO | 2005 | 252 | 11 | 38 | 48.648 | P | 0.200 | -0.425 |
| DBO  | 2005 | 252 | 11 | 38 | 51.658 | P | 0.200 | 0.232  |

|      |     |    |    |         |           |           |          |    |        |
|------|-----|----|----|---------|-----------|-----------|----------|----|--------|
| 2005 | 321 | 19 | 26 | 57.0058 | -22.31900 | -67.88700 | 162.6000 | 36 | -0.001 |
|------|-----|----|----|---------|-----------|-----------|----------|----|--------|

|      |      |     |    |    |        |   |       |        |
|------|------|-----|----|----|--------|---|-------|--------|
| SDD  | 2005 | 321 | 19 | 38 | 9.467  | P | 0.200 | 0.241  |
| SVD  | 2005 | 321 | 19 | 38 | 9.906  | P | 0.200 | 0.517  |
| BBR  | 2005 | 321 | 19 | 38 | 10.051 | P | 0.200 | 0.479  |
| HEC  | 2005 | 321 | 19 | 38 | 10.084 | P | 0.200 | 0.366  |
| TUQ  | 2005 | 321 | 19 | 38 | 10.929 | P | 0.200 | 0.220  |
| CIA  | 2005 | 321 | 19 | 38 | 11.343 | P | 0.200 | -0.032 |
| BFS  | 2005 | 321 | 19 | 38 | 12.018 | P | 0.200 | -0.076 |
| VTV  | 2005 | 321 | 19 | 38 | 12.030 | P | 0.200 | -0.109 |
| FMP  | 2005 | 321 | 19 | 38 | 12.171 | P | 0.200 | -0.050 |
| RRX  | 2005 | 321 | 19 | 38 | 12.419 | P | 0.200 | 0.211  |
| ADO  | 2005 | 321 | 19 | 38 | 12.557 | P | 0.200 | 0.166  |
| RPV  | 2005 | 321 | 19 | 38 | 12.738 | P | 0.200 | 0.116  |
| PAS  | 2005 | 321 | 19 | 38 | 13.433 | P | 0.200 | 0.065  |
| MWC  | 2005 | 321 | 19 | 38 | 13.476 | P | 0.200 | 0.065  |
| GSC  | 2005 | 321 | 19 | 38 | 13.561 | P | 0.200 | 0.273  |
| CHF  | 2005 | 321 | 19 | 38 | 13.740 | P | 0.200 | 0.067  |
| SHO  | 2005 | 321 | 19 | 38 | 13.752 | P | 0.200 | 0.137  |
| USC  | 2005 | 321 | 19 | 38 | 13.890 | P | 0.200 | 0.548  |
| DEC  | 2005 | 321 | 19 | 38 | 14.321 | P | 0.200 | -0.057 |
| DJJ  | 2005 | 321 | 19 | 38 | 14.330 | P | 0.200 | -0.010 |
| VCS  | 2005 | 321 | 19 | 38 | 14.503 | P | 0.200 | -0.166 |
| SNCC | 2005 | 321 | 19 | 38 | 14.589 | P | 0.200 | -0.180 |
| EDW2 | 2005 | 321 | 19 | 38 | 15.569 | P | 0.200 | -0.141 |
| TOV  | 2005 | 321 | 19 | 38 | 15.676 | P | 0.200 | -0.054 |
| LGU  | 2005 | 321 | 19 | 38 | 16.218 | P | 0.200 | -0.225 |
| OSI  | 2005 | 321 | 19 | 38 | 16.947 | P | 0.200 | -0.302 |
| LRL  | 2005 | 321 | 19 | 38 | 17.130 | P | 0.200 | 0.174  |
| SLA  | 2005 | 321 | 19 | 38 | 17.185 | P | 0.200 | -0.004 |
| SCZ2 | 2005 | 321 | 19 | 38 | 17.627 | P | 0.200 | -0.412 |
| FUR  | 2005 | 321 | 19 | 38 | 18.249 | P | 0.200 | 0.399  |
| TPNV | 2005 | 321 | 19 | 38 | 18.535 | P | 0.200 | 0.653  |
| MPM  | 2005 | 321 | 19 | 38 | 18.791 | P | 0.200 | 0.079  |
| ARV  | 2005 | 321 | 19 | 38 | 19.638 | P | 0.200 | 0.252  |
| SBC  | 2005 | 321 | 19 | 38 | 19.894 | P | 0.200 | -0.076 |
| ISA  | 2005 | 321 | 19 | 38 | 20.765 | P | 0.200 | 0.335  |
| BAK  | 2005 | 321 | 19 | 38 | 21.472 | P | 0.200 | 0.146  |
| GRA  | 2005 | 321 | 19 | 38 | 22.208 | P | 0.200 | 0.450  |
| MPP  | 2005 | 321 | 19 | 38 | 22.277 | P | 0.200 | 0.082  |
| CWC  | 2005 | 321 | 19 | 38 | 22.375 | P | 0.200 | 0.259  |
| VES  | 2005 | 321 | 19 | 38 | 22.841 | P | 0.200 | -0.263 |
| SDP  | 2005 | 321 | 19 | 38 | 23.202 | P | 0.200 | -0.114 |
| RCT  | 2005 | 321 | 19 | 38 | 24.542 | P | 0.200 | -0.875 |
| SMM  | 2005 | 321 | 19 | 38 | 24.607 | P | 0.200 | 0.285  |

|      |      |     |    |    |        |   |       |        |
|------|------|-----|----|----|--------|---|-------|--------|
| TIN  | 2005 | 321 | 19 | 38 | 25.145 | P | 0.200 | 0.300  |
| TPH  | 2005 | 321 | 19 | 38 | 25.659 | P | 0.200 | 0.131  |
| HELL | 2005 | 321 | 19 | 38 | 25.763 | P | 0.200 | -0.326 |
| SN11 | 2005 | 321 | 19 | 38 | 25.906 | P | 0.200 | -1.055 |
| V05C | 2005 | 321 | 19 | 38 | 26.296 | P | 0.200 | 0.177  |
| PHL  | 2005 | 321 | 19 | 38 | 26.617 | P | 0.200 | -0.060 |
| S08C | 2005 | 321 | 19 | 38 | 27.010 | P | 0.200 | 0.375  |
| SN15 | 2005 | 321 | 19 | 38 | 27.273 | P | 0.200 | 0.035  |
| SN14 | 2005 | 321 | 19 | 38 | 27.325 | P | 0.200 | -0.088 |
| SN22 | 2005 | 321 | 19 | 38 | 27.587 | P | 0.200 | -0.933 |
| SN25 | 2005 | 321 | 19 | 38 | 27.879 | P | 0.200 | 0.100  |
| SN26 | 2005 | 321 | 19 | 38 | 28.024 | P | 0.200 | 0.196  |
| SN23 | 2005 | 321 | 19 | 38 | 28.074 | P | 0.200 | -0.520 |
| U05C | 2005 | 321 | 19 | 38 | 28.081 | P | 0.200 | -0.352 |
| SN28 | 2005 | 321 | 19 | 38 | 28.288 | P | 0.200 | 0.268  |
| PKD  | 2005 | 321 | 19 | 38 | 28.330 | P | 0.200 | -0.263 |
| T06C | 2005 | 321 | 19 | 38 | 28.487 | P | 0.200 | -1.044 |
| RAMR | 2005 | 321 | 19 | 38 | 28.730 | P | 0.200 | 0.070  |
| V04C | 2005 | 321 | 19 | 38 | 28.730 | P | 0.200 | 0.067  |
| SN34 | 2005 | 321 | 19 | 38 | 29.080 | P | 0.200 | -0.005 |
| SN36 | 2005 | 321 | 19 | 38 | 29.119 | P | 0.200 | 0.215  |
| SN37 | 2005 | 321 | 19 | 38 | 29.247 | P | 0.200 | 0.360  |
| MLAC | 2005 | 321 | 19 | 38 | 29.438 | P | 0.200 | 0.253  |
| SN38 | 2005 | 321 | 19 | 38 | 29.514 | P | 0.200 | 0.379  |
| SN44 | 2005 | 321 | 19 | 38 | 30.154 | P | 0.200 | -0.092 |
| MNV  | 2005 | 321 | 19 | 38 | 30.177 | P | 0.200 | 0.222  |
| SN43 | 2005 | 321 | 19 | 38 | 30.255 | P | 0.200 | -0.335 |
| SN46 | 2005 | 321 | 19 | 38 | 30.432 | P | 0.200 | 0.281  |
| SN45 | 2005 | 321 | 19 | 38 | 30.494 | P | 0.200 | 0.077  |
| SN47 | 2005 | 321 | 19 | 38 | 30.512 | P | 0.200 | 0.390  |
| SN52 | 2005 | 321 | 19 | 38 | 30.585 | P | 0.200 | -0.629 |
| SN48 | 2005 | 321 | 19 | 38 | 30.627 | P | 0.200 | 0.359  |
| U04C | 2005 | 321 | 19 | 38 | 30.983 | P | 0.200 | 0.152  |
| SN53 | 2005 | 321 | 19 | 38 | 31.158 | P | 0.200 | -0.293 |
| SN51 | 2005 | 321 | 19 | 38 | 31.361 | P | 0.200 | -0.362 |
| V03C | 2005 | 321 | 19 | 38 | 31.492 | P | 0.200 | 0.311  |
| SN54 | 2005 | 321 | 19 | 38 | 31.851 | P | 0.200 | 0.047  |
| SN57 | 2005 | 321 | 19 | 38 | 31.948 | P | 0.200 | 0.335  |
| SN55 | 2005 | 321 | 19 | 38 | 31.998 | P | 0.200 | 0.054  |
| R07C | 2005 | 321 | 19 | 38 | 32.004 | P | 0.200 | 0.436  |
| SN56 | 2005 | 321 | 19 | 38 | 32.020 | P | 0.200 | 0.316  |
| SN62 | 2005 | 321 | 19 | 38 | 32.320 | P | 0.200 | -0.413 |
| T05C | 2005 | 321 | 19 | 38 | 32.656 | P | 0.200 | 0.291  |
| S05C | 2005 | 321 | 19 | 38 | 32.755 | P | 0.200 | -0.091 |
| SN64 | 2005 | 321 | 19 | 38 | 32.871 | P | 0.200 | 0.053  |
| SN67 | 2005 | 321 | 19 | 38 | 33.106 | P | 0.200 | 0.449  |
| SN65 | 2005 | 321 | 19 | 38 | 33.179 | P | 0.200 | 0.159  |
| S06C | 2005 | 321 | 19 | 38 | 33.392 | P | 0.200 | -0.048 |
| SN66 | 2005 | 321 | 19 | 38 | 33.498 | P | 0.200 | 0.508  |
| HAST | 2005 | 321 | 19 | 38 | 33.644 | P | 0.200 | 0.003  |
| SCZ  | 2005 | 321 | 19 | 38 | 33.840 | P | 0.200 | 0.071  |
| SN73 | 2005 | 321 | 19 | 38 | 33.887 | P | 0.200 | -0.160 |
| SN71 | 2005 | 321 | 19 | 38 | 34.033 | P | 0.200 | -0.175 |
| SN74 | 2005 | 321 | 19 | 38 | 34.095 | P | 0.200 | -0.020 |
| SN75 | 2005 | 321 | 19 | 38 | 34.207 | P | 0.200 | 0.179  |
| SAO  | 2005 | 321 | 19 | 38 | 34.581 | P | 0.200 | -0.023 |
| SN76 | 2005 | 321 | 19 | 38 | 34.631 | P | 0.200 | 0.417  |
| R06C | 2005 | 321 | 19 | 38 | 35.126 | P | 0.200 | 0.578  |
| PACP | 2005 | 321 | 19 | 38 | 35.172 | P | 0.200 | 0.233  |
| SN84 | 2005 | 321 | 19 | 38 | 35.322 | P | 0.200 | -0.116 |
| CMB  | 2005 | 321 | 19 | 38 | 35.558 | P | 0.200 | -0.177 |
| SN85 | 2005 | 321 | 19 | 38 | 35.618 | P | 0.200 | 0.263  |
| SN86 | 2005 | 321 | 19 | 38 | 36.109 | P | 0.200 | 0.367  |

|      |      |     |    |    |        |   |       |        |
|------|------|-----|----|----|--------|---|-------|--------|
| SN95 | 2005 | 321 | 19 | 38 | 36.362 | P | 0.200 | -0.190 |
| S04C | 2005 | 321 | 19 | 38 | 36.990 | P | 0.200 | 0.280  |
| R05C | 2005 | 321 | 19 | 38 | 37.693 | P | 0.200 | 0.268  |
| MHC  | 2005 | 321 | 19 | 38 | 37.753 | P | 0.200 | 0.327  |
| BNLO | 2005 | 321 | 19 | 38 | 38.229 | P | 0.200 | -0.280 |
| R04C | 2005 | 321 | 19 | 38 | 38.404 | P | 0.200 | 0.309  |
| WENL | 2005 | 321 | 19 | 38 | 39.078 | P | 0.200 | 0.551  |
| LAVA | 2005 | 321 | 19 | 38 | 39.211 | P | 0.200 | -0.207 |
| JRSC | 2005 | 321 | 19 | 38 | 39.356 | P | 0.200 | -0.033 |
| BDM  | 2005 | 321 | 19 | 38 | 40.558 | P | 0.200 | 0.361  |
| BRIB | 2005 | 321 | 19 | 38 | 41.124 | P | 0.200 | 0.100  |
| BRK  | 2005 | 321 | 19 | 38 | 41.125 | P | 0.200 | 0.056  |
| BKS  | 2005 | 321 | 19 | 38 | 41.151 | P | 0.200 | -0.003 |
| P05C | 2005 | 321 | 19 | 38 | 41.363 | P | 0.200 | 0.368  |
| Q04C | 2005 | 321 | 19 | 38 | 41.804 | P | 0.200 | 0.125  |
| FARB | 2005 | 321 | 19 | 38 | 42.608 | P | 0.200 | -0.457 |
| CVS  | 2005 | 321 | 19 | 38 | 43.064 | P | 0.200 | -0.416 |
| Q03C | 2005 | 321 | 19 | 38 | 43.579 | P | 0.200 | 0.525  |
| SUTB | 2005 | 321 | 19 | 38 | 43.885 | P | 0.200 | -0.482 |
| O05C | 2005 | 321 | 19 | 38 | 44.394 | P | 0.200 | 0.170  |
| ORV  | 2005 | 321 | 19 | 38 | 44.575 | P | 0.200 | 0.106  |
| MNRC | 2005 | 321 | 19 | 38 | 45.512 | P | 0.200 | 0.284  |
| O04C | 2005 | 321 | 19 | 38 | 45.836 | P | 0.200 | -0.248 |
| ELFS | 2005 | 321 | 19 | 38 | 45.895 | P | 0.200 | -0.258 |
| O03C | 2005 | 321 | 19 | 38 | 46.837 | P | 0.200 | -0.937 |
| M06C | 2005 | 321 | 19 | 38 | 47.275 | P | 0.200 | 0.013  |
| HOPS | 2005 | 321 | 19 | 38 | 47.825 | P | 0.200 | 0.233  |
| HATC | 2005 | 321 | 19 | 38 | 48.480 | P | 0.200 | -0.510 |
| GASB | 2005 | 321 | 19 | 38 | 49.200 | P | 0.200 | 0.308  |
| M05C | 2005 | 321 | 19 | 38 | 49.628 | P | 0.200 | -0.249 |
| WDC  | 2005 | 321 | 19 | 38 | 49.718 | P | 0.200 | -1.733 |
| P01C | 2005 | 321 | 19 | 38 | 50.533 | P | 0.200 | 0.271  |
| M03C | 2005 | 321 | 19 | 38 | 51.619 | P | 0.200 | -0.958 |
| M04C | 2005 | 321 | 19 | 38 | 53.070 | P | 0.200 | -0.469 |
| N02C | 2005 | 321 | 19 | 38 | 54.432 | P | 0.200 | -0.307 |
| M02C | 2005 | 321 | 19 | 38 | 54.525 | P | 0.200 | -0.692 |
| YBH  | 2005 | 321 | 19 | 38 | 54.892 | P | 0.200 | -0.992 |
| JCC  | 2005 | 321 | 19 | 38 | 56.834 | P | 0.200 | 0.061  |
| HUMO | 2005 | 321 | 19 | 38 | 59.003 | P | 0.200 | -0.481 |
| DBO  | 2005 | 321 | 19 | 39 | 1.832  | P | 0.200 | -0.118 |
| TAKO | 2005 | 321 | 19 | 39 | 6.308  | P | 0.200 | -0.031 |

|      |      |     |    |        |           |           |         |        |        |
|------|------|-----|----|--------|-----------|-----------|---------|--------|--------|
| 2006 | 145  | 20  | 48 | 6.5892 | -18.14100 | -71.16100 | 34.8000 | 132    | -0.005 |
| SVD  | 2006 | 145 | 20 | 59     | 2.286     | P         | 0.200   | 0.399  |        |
| HEC  | 2006 | 145 | 20 | 59     | 2.395     | P         | 0.200   | 0.208  |        |
| BBR  | 2006 | 145 | 20 | 59     | 2.473     | P         | 0.200   | 0.411  |        |
| TUQ  | 2006 | 145 | 20 | 59     | 3.147     | P         | 0.200   | -0.104 |        |
| CIA  | 2006 | 145 | 20 | 59     | 4.125     | P         | 0.200   | 0.047  |        |
| BFS  | 2006 | 145 | 20 | 59     | 4.588     | P         | 0.200   | -0.204 |        |
| VTV  | 2006 | 145 | 20 | 59     | 4.592     | P         | 0.200   | -0.233 |        |
| RRX  | 2006 | 145 | 20 | 59     | 4.971     | P         | 0.200   | 0.097  |        |
| RPV  | 2006 | 145 | 20 | 59     | 5.349     | P         | 0.200   | -0.061 |        |
| GSC  | 2006 | 145 | 20 | 59     | 6.125     | P         | 0.200   | 0.113  |        |
| MWC  | 2006 | 145 | 20 | 59     | 6.256     | P         | 0.200   | 0.039  |        |
| PAS  | 2006 | 145 | 20 | 59     | 6.277     | P         | 0.200   | 0.086  |        |
| SHO  | 2006 | 145 | 20 | 59     | 6.390     | P         | 0.200   | 0.013  |        |
| CHF  | 2006 | 145 | 20 | 59     | 6.538     | P         | 0.200   | 0.035  |        |
| DJJ  | 2006 | 145 | 20 | 59     | 7.144     | P         | 0.200   | -0.079 |        |
| VCS  | 2006 | 145 | 20 | 59     | 7.314     | P         | 0.200   | -0.228 |        |
| DEC  | 2006 | 145 | 20 | 59     | 7.336     | P         | 0.200   | 0.062  |        |
| EDW2 | 2006 | 145 | 20 | 59     | 8.197     | P         | 0.200   | -0.464 |        |
| TOV  | 2006 | 145 | 20 | 59     | 8.607     | P         | 0.200   | -0.129 |        |
| LGU  | 2006 | 145 | 20 | 59     | 9.209     | P         | 0.200   | -0.290 |        |

|      |      |     |    |    |        |   |       |        |
|------|------|-----|----|----|--------|---|-------|--------|
| OSI  | 2006 | 145 | 20 | 59 | 9.962  | P | 0.200 | -0.359 |
| LRL  | 2006 | 145 | 20 | 59 | 9.977  | P | 0.200 | 0.006  |
| SLA  | 2006 | 145 | 20 | 59 | 10.084 | P | 0.200 | -0.115 |
| MPM  | 2006 | 145 | 20 | 59 | 11.439 | P | 0.200 | -0.380 |
| TPNV | 2006 | 145 | 20 | 59 | 11.560 | P | 0.200 | 0.643  |
| ARV  | 2006 | 145 | 20 | 59 | 12.761 | P | 0.200 | 0.128  |
| ISA  | 2006 | 145 | 20 | 59 | 13.824 | P | 0.200 | 0.104  |
| BAK  | 2006 | 145 | 20 | 59 | 14.776 | P | 0.200 | 0.073  |
| CWC  | 2006 | 145 | 20 | 59 | 15.632 | P | 0.200 | 0.138  |
| MPP  | 2006 | 145 | 20 | 59 | 15.770 | P | 0.200 | 0.097  |
| VES  | 2006 | 145 | 20 | 59 | 16.564 | P | 0.200 | -0.027 |
| S09A | 2006 | 145 | 20 | 59 | 17.684 | P | 0.200 | 0.037  |
| RCT  | 2006 | 145 | 20 | 59 | 18.226 | P | 0.200 | -0.826 |
| SMM  | 2006 | 145 | 20 | 59 | 18.305 | P | 0.200 | 0.364  |
| TIN  | 2006 | 145 | 20 | 59 | 18.755 | P | 0.200 | 0.334  |
| TPH  | 2006 | 145 | 20 | 59 | 19.297 | P | 0.200 | 0.162  |
| SN11 | 2006 | 145 | 20 | 59 | 19.561 | P | 0.200 | -1.187 |
| HELL | 2006 | 145 | 20 | 59 | 19.584 | P | 0.200 | -0.199 |
| V05C | 2006 | 145 | 20 | 59 | 20.002 | P | 0.200 | 0.170  |
| SN16 | 2006 | 145 | 20 | 59 | 20.062 | P | 0.200 | 0.186  |
| SN21 | 2006 | 145 | 20 | 59 | 20.425 | P | 0.200 | -1.541 |
| S08C | 2006 | 145 | 20 | 59 | 20.526 | P | 0.200 | 0.198  |
| PHL  | 2006 | 145 | 20 | 59 | 20.544 | P | 0.200 | 0.085  |
| SN15 | 2006 | 145 | 20 | 59 | 21.141 | P | 0.200 | 0.177  |
| SN25 | 2006 | 145 | 20 | 59 | 21.596 | P | 0.200 | 0.025  |
| SN26 | 2006 | 145 | 20 | 59 | 21.692 | P | 0.200 | 0.063  |
| SN23 | 2006 | 145 | 20 | 59 | 21.913 | P | 0.200 | -0.547 |
| U05C | 2006 | 145 | 20 | 59 | 22.065 | P | 0.200 | -0.293 |
| PKD  | 2006 | 145 | 20 | 59 | 22.236 | P | 0.200 | -0.281 |
| SN28 | 2006 | 145 | 20 | 59 | 22.260 | P | 0.200 | 0.442  |
| T06C | 2006 | 145 | 20 | 59 | 22.278 | P | 0.200 | -1.222 |
| Q09A | 2006 | 145 | 20 | 59 | 22.533 | P | 0.200 | 0.310  |
| SN36 | 2006 | 145 | 20 | 59 | 22.558 | P | 0.200 | -0.216 |
| V04C | 2006 | 145 | 20 | 59 | 22.755 | P | 0.200 | 0.154  |
| SN37 | 2006 | 145 | 20 | 59 | 22.996 | P | 0.200 | 0.232  |
| SN38 | 2006 | 145 | 20 | 59 | 23.328 | P | 0.200 | 0.299  |
| MLAC | 2006 | 145 | 20 | 59 | 23.462 | P | 0.200 | 0.376  |
| R08A | 2006 | 145 | 20 | 59 | 23.541 | P | 0.200 | 0.080  |
| SN44 | 2006 | 145 | 20 | 59 | 23.709 | P | 0.200 | -0.518 |
| MNV  | 2006 | 145 | 20 | 59 | 23.997 | P | 0.200 | 0.097  |
| SN46 | 2006 | 145 | 20 | 59 | 24.364 | P | 0.200 | 0.258  |
| SN47 | 2006 | 145 | 20 | 59 | 24.403 | P | 0.200 | 0.314  |
| SN48 | 2006 | 145 | 20 | 59 | 24.426 | P | 0.200 | 0.187  |
| SN52 | 2006 | 145 | 20 | 59 | 24.441 | P | 0.200 | -0.851 |
| Q08A | 2006 | 145 | 20 | 59 | 24.544 | P | 0.200 | -0.240 |
| P09A | 2006 | 145 | 20 | 59 | 25.039 | P | 0.200 | -0.059 |
| U04C | 2006 | 145 | 20 | 59 | 25.108 | P | 0.200 | 0.175  |
| SN51 | 2006 | 145 | 20 | 59 | 25.359 | P | 0.200 | -0.472 |
| V03C | 2006 | 145 | 20 | 59 | 25.813 | P | 0.200 | 0.482  |
| SN54 | 2006 | 145 | 20 | 59 | 25.929 | P | 0.200 | 0.026  |
| SN57 | 2006 | 145 | 20 | 59 | 26.045 | P | 0.200 | 0.364  |
| SN55 | 2006 | 145 | 20 | 59 | 26.068 | P | 0.200 | 0.044  |
| R07C | 2006 | 145 | 20 | 59 | 26.106 | P | 0.200 | 0.467  |
| SN64 | 2006 | 145 | 20 | 59 | 27.120 | P | 0.200 | 0.137  |
| SN67 | 2006 | 145 | 20 | 59 | 27.237 | P | 0.200 | 0.433  |
| SN65 | 2006 | 145 | 20 | 59 | 27.377 | P | 0.200 | 0.200  |
| S06C | 2006 | 145 | 20 | 59 | 27.598 | P | 0.200 | -0.057 |
| SN66 | 2006 | 145 | 20 | 59 | 27.650 | P | 0.200 | 0.490  |
| O09A | 2006 | 145 | 20 | 59 | 27.730 | P | 0.200 | -0.007 |
| HAST | 2006 | 145 | 20 | 59 | 27.992 | P | 0.200 | 0.034  |
| SN73 | 2006 | 145 | 20 | 59 | 28.147 | P | 0.200 | -0.183 |
| SN71 | 2006 | 145 | 20 | 59 | 28.174 | P | 0.200 | -0.340 |
| Q07A | 2006 | 145 | 20 | 59 | 28.501 | P | 0.200 | 0.352  |

|      |      |     |    |    |        |   |       |        |
|------|------|-----|----|----|--------|---|-------|--------|
| BMN  | 2006 | 145 | 20 | 59 | 28.518 | P | 0.200 | -0.323 |
| SN76 | 2006 | 145 | 20 | 59 | 28.777 | P | 0.200 | 0.302  |
| SAO  | 2006 | 145 | 20 | 59 | 28.844 | P | 0.200 | -0.136 |
| P08A | 2006 | 145 | 20 | 59 | 28.913 | P | 0.200 | 0.207  |
| R06C | 2006 | 145 | 20 | 59 | 29.399 | P | 0.200 | 0.559  |
| PACP | 2006 | 145 | 20 | 59 | 29.596 | P | 0.200 | 0.261  |
| SN84 | 2006 | 145 | 20 | 59 | 29.728 | P | 0.200 | -0.087 |
| CMB  | 2006 | 145 | 20 | 59 | 29.896 | P | 0.200 | -0.234 |
| O08A | 2006 | 145 | 20 | 59 | 31.191 | P | 0.200 | -0.339 |
| P07A | 2006 | 145 | 20 | 59 | 31.199 | P | 0.200 | 0.430  |
| S04C | 2006 | 145 | 20 | 59 | 31.397 | P | 0.200 | 0.161  |
| R05C | 2006 | 145 | 20 | 59 | 32.176 | P | 0.200 | 0.262  |
| MHC  | 2006 | 145 | 20 | 59 | 32.357 | P | 0.200 | 0.363  |
| N08A | 2006 | 145 | 20 | 59 | 32.416 | P | 0.200 | -0.964 |
| O07A | 2006 | 145 | 20 | 59 | 32.902 | P | 0.200 | -0.354 |
| BNLO | 2006 | 145 | 20 | 59 | 33.031 | P | 0.200 | -0.139 |
| R04C | 2006 | 145 | 20 | 59 | 33.246 | P | 0.200 | 0.534  |
| WCN  | 2006 | 145 | 20 | 59 | 33.486 | P | 0.200 | 0.486  |
| WENL | 2006 | 145 | 20 | 59 | 33.733 | P | 0.200 | 0.530  |
| LAVA | 2006 | 145 | 20 | 59 | 33.880 | P | 0.200 | -0.221 |
| JRSC | 2006 | 145 | 20 | 59 | 34.242 | P | 0.200 | 0.099  |
| P06A | 2006 | 145 | 20 | 59 | 35.099 | P | 0.200 | 0.188  |
| BDM  | 2006 | 145 | 20 | 59 | 35.675 | P | 0.200 | 0.697  |
| N07B | 2006 | 145 | 20 | 59 | 35.782 | P | 0.200 | -0.255 |
| BRK  | 2006 | 145 | 20 | 59 | 36.181 | P | 0.200 | 0.239  |
| BKS  | 2006 | 145 | 20 | 59 | 36.200 | P | 0.200 | 0.188  |
| BRIB | 2006 | 145 | 20 | 59 | 36.211 | P | 0.200 | 0.348  |
| P05C | 2006 | 145 | 20 | 59 | 36.244 | P | 0.200 | 0.454  |
| Q04C | 2006 | 145 | 20 | 59 | 37.013 | P | 0.200 | 0.462  |
| BEK  | 2006 | 145 | 20 | 59 | 37.334 | P | 0.200 | 0.220  |
| FARB | 2006 | 145 | 20 | 59 | 37.828 | P | 0.200 | -0.276 |
| CVS  | 2006 | 145 | 20 | 59 | 38.340 | P | 0.200 | -0.180 |
| Q03C | 2006 | 145 | 20 | 59 | 38.807 | P | 0.200 | 0.767  |
| M07A | 2006 | 145 | 20 | 59 | 38.897 | P | 0.200 | -0.209 |
| MCCM | 2006 | 145 | 20 | 59 | 39.041 | P | 0.200 | -0.148 |
| SUTB | 2006 | 145 | 20 | 59 | 39.154 | P | 0.200 | -0.288 |
| O05C | 2006 | 145 | 20 | 59 | 39.631 | P | 0.200 | 0.347  |
| ORV  | 2006 | 145 | 20 | 59 | 40.003 | P | 0.200 | 0.438  |
| MNRC | 2006 | 145 | 20 | 59 | 40.767 | P | 0.200 | 0.361  |
| ELFS | 2006 | 145 | 20 | 59 | 41.464 | P | 0.200 | 0.120  |
| M06C | 2006 | 145 | 20 | 59 | 42.696 | P | 0.200 | 0.131  |
| HOPS | 2006 | 145 | 20 | 59 | 43.380 | P | 0.200 | 0.400  |
| HATC | 2006 | 145 | 20 | 59 | 44.136 | P | 0.200 | -0.281 |
| GASB | 2006 | 145 | 20 | 59 | 44.925 | P | 0.200 | 0.578  |
| M05C | 2006 | 145 | 20 | 59 | 45.306 | P | 0.200 | -0.072 |
| WDC  | 2006 | 145 | 20 | 59 | 45.337 | P | 0.200 | -1.745 |
| O02C | 2006 | 145 | 20 | 59 | 45.736 | P | 0.200 | -0.707 |
| P01C | 2006 | 145 | 20 | 59 | 46.177 | P | 0.200 | 0.354  |
| M03C | 2006 | 145 | 20 | 59 | 47.366 | P | 0.200 | -0.919 |
| M04C | 2006 | 145 | 20 | 59 | 49.036 | P | 0.200 | -0.277 |
| M02C | 2006 | 145 | 20 | 59 | 50.288 | P | 0.200 | -0.862 |
| O01C | 2006 | 145 | 20 | 59 | 50.335 | P | 0.200 | 0.487  |
| YBH  | 2006 | 145 | 20 | 59 | 50.460 | P | 0.200 | -1.410 |
| N02C | 2006 | 145 | 20 | 59 | 50.512 | P | 0.200 | -0.114 |
| JCC  | 2006 | 145 | 20 | 59 | 53.052 | P | 0.200 | 0.202  |
| L02A | 2006 | 145 | 20 | 59 | 56.259 | P | 0.200 | 0.042  |
| DBO  | 2006 | 145 | 20 | 59 | 58.511 | P | 0.200 | 0.056  |
| J02A | 2006 | 145 | 21 | 0  | 0.617  | P | 0.200 | 0.372  |
| I03A | 2006 | 145 | 21 | 0  | 1.707  | P | 0.200 | 0.159  |

|      |      |     |   |         |           |           |          |       |        |
|------|------|-----|---|---------|-----------|-----------|----------|-------|--------|
| 2006 | 178  | 2   | 7 | 34.6606 | -22.76200 | -68.69500 | 115.0000 | 142   | -0.004 |
| HEC  | 2006 | 178 | 2 | 18      | 52.134    | P         | 0.200    | 0.301 |        |
| BBR  | 2006 | 178 | 2 | 18      | 52.183    | P         | 0.200    | 0.565 |        |

|      |      |     |   |    |        |   |       |        |
|------|------|-----|---|----|--------|---|-------|--------|
| V11A | 2006 | 178 | 2 | 18 | 52.919 | P | 0.200 | 0.083  |
| TUQ  | 2006 | 178 | 2 | 18 | 53.046 | P | 0.200 | 0.156  |
| VTV  | 2006 | 178 | 2 | 18 | 53.372 | P | 0.200 | -0.817 |
| CIA  | 2006 | 178 | 2 | 18 | 53.399 | P | 0.200 | 0.111  |
| BFS  | 2006 | 178 | 2 | 18 | 54.020 | P | 0.200 | -0.086 |
| RRX  | 2006 | 178 | 2 | 18 | 54.549 | P | 0.200 | 0.253  |
| PAS  | 2006 | 178 | 2 | 18 | 55.411 | P | 0.200 | 0.059  |
| MWC  | 2006 | 178 | 2 | 18 | 55.514 | P | 0.200 | 0.104  |
| GSC  | 2006 | 178 | 2 | 18 | 55.634 | P | 0.200 | 0.212  |
| U11A | 2006 | 178 | 2 | 18 | 55.658 | P | 0.200 | 0.431  |
| VCS  | 2006 | 178 | 2 | 18 | 55.710 | P | 0.200 | -0.977 |
| CHF  | 2006 | 178 | 2 | 18 | 55.789 | P | 0.200 | 0.111  |
| SHO  | 2006 | 178 | 2 | 18 | 55.944 | P | 0.200 | 0.129  |
| DJJ  | 2006 | 178 | 2 | 18 | 56.395 | P | 0.200 | 0.082  |
| DEC  | 2006 | 178 | 2 | 18 | 56.452 | P | 0.200 | 0.085  |
| TOV  | 2006 | 178 | 2 | 18 | 56.983 | P | 0.200 | -0.703 |
| EDW2 | 2006 | 178 | 2 | 18 | 57.465 | P | 0.200 | -0.291 |
| LGU  | 2006 | 178 | 2 | 18 | 58.263 | P | 0.200 | -0.126 |
| U10A | 2006 | 178 | 2 | 18 | 58.758 | P | 0.200 | 0.448  |
| OSI  | 2006 | 178 | 2 | 18 | 59.045 | P | 0.200 | -0.199 |
| LRL  | 2006 | 178 | 2 | 18 | 59.136 | P | 0.200 | 0.075  |
| FUR  | 2006 | 178 | 2 | 19 | 0.415  | P | 0.200 | 0.353  |
| MPM  | 2006 | 178 | 2 | 19 | 0.651  | P | 0.200 | -0.220 |
| TPNV | 2006 | 178 | 2 | 19 | 0.762  | P | 0.200 | 0.607  |
| ARV  | 2006 | 178 | 2 | 19 | 1.776  | P | 0.200 | 0.346  |
| ISA  | 2006 | 178 | 2 | 19 | 2.759  | P | 0.200 | 0.221  |
| GRA  | 2006 | 178 | 2 | 19 | 4.399  | P | 0.200 | 0.385  |
| CWC  | 2006 | 178 | 2 | 19 | 4.597  | P | 0.200 | 0.296  |
| VES  | 2006 | 178 | 2 | 19 | 5.130  | P | 0.200 | -0.079 |
| Q11A | 2006 | 178 | 2 | 19 | 6.287  | P | 0.200 | 0.299  |
| R10A | 2006 | 178 | 2 | 19 | 6.538  | P | 0.200 | 0.755  |
| S09A | 2006 | 178 | 2 | 19 | 6.549  | P | 0.200 | 0.091  |
| RCT  | 2006 | 178 | 2 | 19 | 6.563  | P | 0.200 | -0.989 |
| SMM  | 2006 | 178 | 2 | 19 | 6.773  | P | 0.200 | 0.417  |
| TIN  | 2006 | 178 | 2 | 19 | 7.461  | P | 0.200 | 0.386  |
| SN11 | 2006 | 178 | 2 | 19 | 7.958  | P | 0.200 | -1.163 |
| R09A | 2006 | 178 | 2 | 19 | 8.120  | P | 0.200 | 0.010  |
| V05C | 2006 | 178 | 2 | 19 | 8.411  | P | 0.200 | 0.213  |
| SN16 | 2006 | 178 | 2 | 19 | 8.504  | P | 0.200 | 0.043  |
| PHL  | 2006 | 178 | 2 | 19 | 8.775  | P | 0.200 | 0.076  |
| SN21 | 2006 | 178 | 2 | 19 | 8.790  | P | 0.200 | -1.472 |
| S08C | 2006 | 178 | 2 | 19 | 9.064  | P | 0.200 | 0.161  |
| SN15 | 2006 | 178 | 2 | 19 | 9.545  | P | 0.200 | 0.074  |
| SN22 | 2006 | 178 | 2 | 19 | 9.712  | P | 0.200 | -0.998 |
| SN25 | 2006 | 178 | 2 | 19 | 10.054 | P | 0.200 | 0.035  |
| SN23 | 2006 | 178 | 2 | 19 | 10.164 | P | 0.200 | -0.637 |
| U05C | 2006 | 178 | 2 | 19 | 10.228 | P | 0.200 | -0.314 |
| SN26 | 2006 | 178 | 2 | 19 | 10.273 | P | 0.200 | 0.182  |
| PKD  | 2006 | 178 | 2 | 19 | 10.483 | P | 0.200 | -0.180 |
| SN24 | 2006 | 178 | 2 | 19 | 10.524 | P | 0.200 | -0.069 |
| T06C | 2006 | 178 | 2 | 19 | 10.601 | P | 0.200 | -1.108 |
| SN28 | 2006 | 178 | 2 | 19 | 10.624 | P | 0.200 | 0.306  |
| V04C | 2006 | 178 | 2 | 19 | 10.847 | P | 0.200 | 0.151  |
| Q09A | 2006 | 178 | 2 | 19 | 10.980 | P | 0.200 | 0.176  |
| MLAC | 2006 | 178 | 2 | 19 | 10.980 | P | 0.200 | -0.460 |
| SN36 | 2006 | 178 | 2 | 19 | 11.172 | P | 0.200 | -0.002 |
| SN34 | 2006 | 178 | 2 | 19 | 11.196 | P | 0.200 | -0.118 |
| SN38 | 2006 | 178 | 2 | 19 | 11.755 | P | 0.200 | 0.312  |
| R08A | 2006 | 178 | 2 | 19 | 11.930 | P | 0.200 | 0.028  |
| P10A | 2006 | 178 | 2 | 19 | 12.156 | P | 0.200 | 0.478  |
| SN43 | 2006 | 178 | 2 | 19 | 12.209 | P | 0.200 | -0.600 |
| MNV  | 2006 | 178 | 2 | 19 | 12.405 | P | 0.200 | 0.112  |
| SN47 | 2006 | 178 | 2 | 19 | 12.736 | P | 0.200 | 0.326  |

|      |      |     |   |    |        |   |       |        |
|------|------|-----|---|----|--------|---|-------|--------|
| SN52 | 2006 | 178 | 2 | 19 | 12.773 | P | 0.200 | -0.635 |
| SN48 | 2006 | 178 | 2 | 19 | 12.821 | P | 0.200 | 0.247  |
| Q08A | 2006 | 178 | 2 | 19 | 12.927 | P | 0.200 | -0.224 |
| U04C | 2006 | 178 | 2 | 19 | 13.162 | P | 0.200 | 0.244  |
| P09A | 2006 | 178 | 2 | 19 | 13.343 | P | 0.200 | -0.209 |
| SN51 | 2006 | 178 | 2 | 19 | 13.634 | P | 0.200 | -0.268 |
| V03C | 2006 | 178 | 2 | 19 | 13.780 | P | 0.200 | 0.555  |
| SN54 | 2006 | 178 | 2 | 19 | 14.030 | P | 0.200 | -0.009 |
| SN57 | 2006 | 178 | 2 | 19 | 14.277 | P | 0.200 | 0.382  |
| SN56 | 2006 | 178 | 2 | 19 | 14.278 | P | 0.200 | 0.309  |
| SN55 | 2006 | 178 | 2 | 19 | 14.295 | P | 0.200 | 0.101  |
| R07C | 2006 | 178 | 2 | 19 | 14.326 | P | 0.200 | 0.479  |
| SN65 | 2006 | 178 | 2 | 19 | 14.779 | P | 0.200 | -0.497 |
| T05C | 2006 | 178 | 2 | 19 | 14.982 | P | 0.200 | 0.489  |
| SN64 | 2006 | 178 | 2 | 19 | 15.156 | P | 0.200 | 0.095  |
| S05C | 2006 | 178 | 2 | 19 | 15.177 | P | 0.200 | 0.156  |
| SN67 | 2006 | 178 | 2 | 19 | 15.440 | P | 0.200 | 0.499  |
| S06C | 2006 | 178 | 2 | 19 | 15.622 | P | 0.200 | -0.055 |
| SN66 | 2006 | 178 | 2 | 19 | 15.717 | P | 0.200 | 0.451  |
| O09A | 2006 | 178 | 2 | 19 | 15.783 | P | 0.200 | -0.250 |
| HAST | 2006 | 178 | 2 | 19 | 15.803 | P | 0.200 | 0.099  |
| SN73 | 2006 | 178 | 2 | 19 | 16.054 | P | 0.200 | -0.217 |
| SN71 | 2006 | 178 | 2 | 19 | 16.127 | P | 0.200 | -0.282 |
| SAO  | 2006 | 178 | 2 | 19 | 16.578 | P | 0.200 | -0.122 |
| Q07A | 2006 | 178 | 2 | 19 | 16.723 | P | 0.200 | 0.467  |
| SN76 | 2006 | 178 | 2 | 19 | 16.809 | P | 0.200 | 0.311  |
| PACP | 2006 | 178 | 2 | 19 | 17.389 | P | 0.200 | 0.324  |
| R06C | 2006 | 178 | 2 | 19 | 17.419 | P | 0.200 | 0.571  |
| SN84 | 2006 | 178 | 2 | 19 | 17.565 | P | 0.200 | -0.123 |
| CMB  | 2006 | 178 | 2 | 19 | 17.684 | P | 0.200 | -0.283 |
| O08A | 2006 | 178 | 2 | 19 | 19.060 | P | 0.200 | -0.482 |
| S04C | 2006 | 178 | 2 | 19 | 19.096 | P | 0.200 | 0.222  |
| P07A | 2006 | 178 | 2 | 19 | 19.176 | P | 0.200 | 0.438  |
| MHC  | 2006 | 178 | 2 | 19 | 19.837 | P | 0.200 | 0.271  |
| R05C | 2006 | 178 | 2 | 19 | 19.981 | P | 0.200 | 0.263  |
| N08A | 2006 | 178 | 2 | 19 | 20.334 | P | 0.200 | -0.961 |
| BNLO | 2006 | 178 | 2 | 19 | 20.432 | P | 0.200 | -0.191 |
| R04C | 2006 | 178 | 2 | 19 | 20.781 | P | 0.200 | 0.450  |
| O07A | 2006 | 178 | 2 | 19 | 20.803 | P | 0.200 | -0.301 |
| WCN  | 2006 | 178 | 2 | 19 | 21.217 | P | 0.200 | 0.441  |
| WENL | 2006 | 178 | 2 | 19 | 21.281 | P | 0.200 | 0.596  |
| LAVA | 2006 | 178 | 2 | 19 | 21.433 | P | 0.200 | -0.260 |
| JRSC | 2006 | 178 | 2 | 19 | 21.629 | P | 0.200 | 0.115  |
| P06A | 2006 | 178 | 2 | 19 | 22.766 | P | 0.200 | 0.174  |
| BDM  | 2006 | 178 | 2 | 19 | 22.835 | P | 0.200 | 0.459  |
| BRK  | 2006 | 178 | 2 | 19 | 23.385 | P | 0.200 | 0.146  |
| N07B | 2006 | 178 | 2 | 19 | 23.426 | P | 0.200 | -0.304 |
| BRIB | 2006 | 178 | 2 | 19 | 23.441 | P | 0.200 | 0.241  |
| BKS  | 2006 | 178 | 2 | 19 | 23.462 | P | 0.200 | 0.145  |
| P05C | 2006 | 178 | 2 | 19 | 23.732 | P | 0.200 | 0.410  |
| Q04C | 2006 | 178 | 2 | 19 | 24.265 | P | 0.200 | 0.316  |
| BEK  | 2006 | 178 | 2 | 19 | 24.784 | P | 0.200 | 0.169  |
| FARB | 2006 | 178 | 2 | 19 | 24.985 | P | 0.200 | -0.216 |
| CVS  | 2006 | 178 | 2 | 19 | 25.356 | P | 0.200 | -0.333 |
| Q03C | 2006 | 178 | 2 | 19 | 25.957 | P | 0.200 | 0.665  |
| MCCM | 2006 | 178 | 2 | 19 | 26.113 | P | 0.200 | -0.132 |
| SUTB | 2006 | 178 | 2 | 19 | 26.265 | P | 0.200 | -0.395 |
| M07A | 2006 | 178 | 2 | 19 | 26.456 | P | 0.200 | -0.164 |
| O05C | 2006 | 178 | 2 | 19 | 26.806 | P | 0.200 | 0.207  |
| ORV  | 2006 | 178 | 2 | 19 | 27.088 | P | 0.200 | 0.290  |
| MNRC | 2006 | 178 | 2 | 19 | 27.697 | P | 0.200 | 0.214  |
| O04C | 2006 | 178 | 2 | 19 | 28.220 | P | 0.200 | -0.263 |
| ELFS | 2006 | 178 | 2 | 19 | 28.563 | P | 0.200 | -0.026 |

|      |      |     |   |    |        |   |       |        |
|------|------|-----|---|----|--------|---|-------|--------|
| L07A | 2006 | 178 | 2 | 19 | 29.747 | P | 0.200 | 0.287  |
| M06C | 2006 | 178 | 2 | 19 | 29.794 | P | 0.200 | 0.044  |
| HOPS | 2006 | 178 | 2 | 19 | 30.203 | P | 0.200 | 0.364  |
| HATC | 2006 | 178 | 2 | 19 | 30.992 | P | 0.200 | -0.423 |
| GASB | 2006 | 178 | 2 | 19 | 31.639 | P | 0.200 | 0.448  |
| WDC  | 2006 | 178 | 2 | 19 | 32.133 | P | 0.200 | -1.686 |
| M05C | 2006 | 178 | 2 | 19 | 32.240 | P | 0.200 | -0.106 |
| O02C | 2006 | 178 | 2 | 19 | 32.535 | P | 0.200 | -0.645 |
| P01C | 2006 | 178 | 2 | 19 | 32.891 | P | 0.200 | 0.367  |
| M03C | 2006 | 178 | 2 | 19 | 34.098 | P | 0.200 | -0.912 |
| L05A | 2006 | 178 | 2 | 19 | 34.239 | P | 0.200 | 0.208  |
| M04C | 2006 | 178 | 2 | 19 | 35.645 | P | 0.200 | -0.375 |
| O01C | 2006 | 178 | 2 | 19 | 36.692 | P | 0.200 | 0.400  |
| M02C | 2006 | 178 | 2 | 19 | 36.993 | P | 0.200 | -0.651 |
| N02C | 2006 | 178 | 2 | 19 | 36.996 | P | 0.200 | -0.114 |
| L04A | 2006 | 178 | 2 | 19 | 37.173 | P | 0.200 | -0.351 |
| K04A | 2006 | 178 | 2 | 19 | 38.295 | P | 0.200 | -0.318 |
| JCC  | 2006 | 178 | 2 | 19 | 39.179 | P | 0.200 | 0.052  |
| L02A | 2006 | 178 | 2 | 19 | 42.359 | P | 0.200 | -0.003 |
| DBO  | 2006 | 178 | 2 | 19 | 44.669 | P | 0.200 | 0.168  |

|      |     |    |   |         |           |           |         |     |        |
|------|-----|----|---|---------|-----------|-----------|---------|-----|--------|
| 2006 | 217 | 14 | 3 | 43.7303 | -33.13100 | -68.70700 | 22.0000 | 205 | -0.001 |
|------|-----|----|---|---------|-----------|-----------|---------|-----|--------|

|      |      |     |    |    |        |   |       |        |
|------|------|-----|----|----|--------|---|-------|--------|
| SVD  | 2006 | 217 | 14 | 15 | 56.381 | P | 0.200 | 0.431  |
| BBR  | 2006 | 217 | 14 | 15 | 56.829 | P | 0.200 | 0.544  |
| CIA  | 2006 | 217 | 14 | 15 | 57.022 | P | 0.200 | 0.197  |
| HEC  | 2006 | 217 | 14 | 15 | 57.308 | P | 0.200 | 0.361  |
| FMP  | 2006 | 217 | 14 | 15 | 57.987 | P | 0.200 | 0.156  |
| BFS  | 2006 | 217 | 14 | 15 | 58.184 | P | 0.200 | -0.060 |
| RPV  | 2006 | 217 | 14 | 15 | 58.375 | P | 0.200 | 0.235  |
| TUQ  | 2006 | 217 | 14 | 15 | 58.556 | P | 0.200 | 0.272  |
| V11A | 2006 | 217 | 14 | 15 | 58.616 | P | 0.200 | 0.053  |
| RRX  | 2006 | 217 | 14 | 15 | 59.151 | P | 0.200 | 0.212  |
| PAS  | 2006 | 217 | 14 | 15 | 59.251 | P | 0.200 | 0.136  |
| MWC  | 2006 | 217 | 14 | 15 | 59.438 | P | 0.200 | 0.170  |
| CHF  | 2006 | 217 | 14 | 15 | 59.791 | P | 0.200 | 0.243  |
| DJJ  | 2006 | 217 | 14 | 15 | 59.978 | P | 0.200 | 0.101  |
| DEC  | 2006 | 217 | 14 | 16 | 0.279  | P | 0.200 | 0.266  |
| GSC  | 2006 | 217 | 14 | 16 | 0.324  | P | 0.200 | 0.113  |
| VCS  | 2006 | 217 | 14 | 16 | 0.402  | P | 0.200 | -0.118 |
| SHO  | 2006 | 217 | 14 | 16 | 0.899  | P | 0.200 | -0.068 |
| TOV  | 2006 | 217 | 14 | 16 | 1.054  | P | 0.200 | 0.070  |
| U11A | 2006 | 217 | 14 | 16 | 1.265  | P | 0.200 | 0.267  |
| EDW2 | 2006 | 217 | 14 | 16 | 1.407  | P | 0.200 | -0.271 |
| LGU  | 2006 | 217 | 14 | 16 | 1.505  | P | 0.200 | 0.004  |
| OSI  | 2006 | 217 | 14 | 16 | 2.609  | P | 0.200 | -0.026 |
| SCZ2 | 2006 | 217 | 14 | 16 | 2.869  | P | 0.200 | 0.234  |
| LRL  | 2006 | 217 | 14 | 16 | 3.310  | P | 0.200 | 0.107  |
| U10A | 2006 | 217 | 14 | 16 | 3.713  | P | 0.200 | 0.287  |
| SLA  | 2006 | 217 | 14 | 16 | 3.742  | P | 0.200 | -0.032 |
| SBC  | 2006 | 217 | 14 | 16 | 4.892  | P | 0.200 | 0.305  |
| MPM  | 2006 | 217 | 14 | 16 | 5.061  | P | 0.200 | -0.107 |
| FUR  | 2006 | 217 | 14 | 16 | 5.151  | P | 0.200 | 0.383  |
| ARV  | 2006 | 217 | 14 | 16 | 5.183  | P | 0.200 | 0.440  |
| TPNV | 2006 | 217 | 14 | 16 | 5.704  | P | 0.200 | 0.433  |
| ISA  | 2006 | 217 | 14 | 16 | 6.429  | P | 0.200 | 0.296  |
| MPP  | 2006 | 217 | 14 | 16 | 7.263  | P | 0.200 | 0.454  |
| BAK  | 2006 | 217 | 14 | 16 | 7.640  | P | 0.200 | 1.111  |
| VES  | 2006 | 217 | 14 | 16 | 8.277  | P | 0.200 | -0.116 |
| CWC  | 2006 | 217 | 14 | 16 | 8.345  | P | 0.200 | 0.170  |
| GRA  | 2006 | 217 | 14 | 16 | 8.678  | P | 0.200 | 0.307  |
| SMM  | 2006 | 217 | 14 | 16 | 9.365  | P | 0.200 | 0.498  |
| SN11 | 2006 | 217 | 14 | 16 | 10.859 | P | 0.200 | -1.281 |
| SN21 | 2006 | 217 | 14 | 16 | 11.703 | P | 0.200 | -1.451 |



|      |      |     |    |    |        |   |       |        |
|------|------|-----|----|----|--------|---|-------|--------|
| S09A | 2006 | 217 | 14 | 16 | 10.948 | P | 0.200 | 0.067  |
| PHL  | 2006 | 217 | 14 | 16 | 11.034 | P | 0.200 | 0.180  |
| HELL | 2006 | 217 | 14 | 16 | 11.072 | P | 0.200 | -0.428 |
| V05C | 2006 | 217 | 14 | 16 | 11.188 | P | 0.200 | 0.377  |
| TIN  | 2006 | 217 | 14 | 16 | 11.249 | P | 0.200 | 0.403  |
| R10A | 2006 | 217 | 14 | 16 | 11.270 | P | 0.200 | 0.473  |
| Q11A | 2006 | 217 | 14 | 16 | 11.451 | P | 0.200 | 0.055  |
| SN22 | 2006 | 217 | 14 | 16 | 12.530 | P | 0.200 | -1.184 |
| SN23 | 2006 | 217 | 14 | 16 | 13.181 | P | 0.200 | -0.716 |
| TPH  | 2006 | 217 | 14 | 16 | 12.324 | P | 0.200 | 0.032  |
| SN24 | 2006 | 217 | 14 | 16 | 13.404 | P | 0.200 | -0.448 |
| R09A | 2006 | 217 | 14 | 16 | 12.444 | P | 0.200 | -0.182 |
| S08C | 2006 | 217 | 14 | 16 | 12.733 | P | 0.200 | 0.031  |
| PKD  | 2006 | 217 | 14 | 16 | 12.868 | P | 0.200 | 0.029  |
| RAMR | 2006 | 217 | 14 | 16 | 12.890 | P | 0.200 | 0.262  |
| SN34 | 2006 | 217 | 14 | 16 | 14.263 | P | 0.200 | -0.247 |
| T06C | 2006 | 217 | 14 | 16 | 13.381 | P | 0.200 | -1.080 |
| SN44 | 2006 | 217 | 14 | 16 | 15.042 | P | 0.200 | -0.479 |
| SN43 | 2006 | 217 | 14 | 16 | 15.241 | P | 0.200 | -0.474 |
| SN52 | 2006 | 217 | 14 | 16 | 15.582 | P | 0.200 | -0.511 |
| SN45 | 2006 | 217 | 14 | 16 | 15.682 | P | 0.200 | -0.194 |
| Q09A | 2006 | 217 | 14 | 16 | 15.194 | P | 0.200 | -0.006 |
| SN51 | 2006 | 217 | 14 | 16 | 16.378 | P | 0.200 | -0.061 |
| U04C | 2006 | 217 | 14 | 16 | 15.494 | P | 0.200 | 0.590  |
| R08A | 2006 | 217 | 14 | 16 | 15.611 | P | 0.200 | -0.124 |
| V03C | 2006 | 217 | 14 | 16 | 15.686 | P | 0.200 | 0.798  |
| SN54 | 2006 | 217 | 14 | 16 | 16.990 | P | 0.200 | 0.064  |
| SN55 | 2006 | 217 | 14 | 16 | 17.273 | P | 0.200 | 0.068  |
| SN56 | 2006 | 217 | 14 | 16 | 17.314 | P | 0.200 | 0.230  |
| P10A | 2006 | 217 | 14 | 16 | 16.423 | P | 0.200 | -0.065 |
| Q08A | 2006 | 217 | 14 | 16 | 16.798 | P | 0.200 | -0.262 |
| SN64 | 2006 | 217 | 14 | 16 | 18.025 | P | 0.200 | 0.162  |
| T05C | 2006 | 217 | 14 | 16 | 17.352 | P | 0.200 | 0.761  |
| SN71 | 2006 | 217 | 14 | 16 | 18.439 | P | 0.200 | -0.271 |
| R07C | 2006 | 217 | 14 | 16 | 17.441 | P | 0.200 | 0.400  |
| HAST | 2006 | 217 | 14 | 16 | 17.457 | P | 0.200 | 0.275  |
| P09A | 2006 | 217 | 14 | 16 | 17.481 | P | 0.200 | -0.474 |
| SN73 | 2006 | 217 | 14 | 16 | 18.512 | P | 0.200 | -0.252 |
| S05C | 2006 | 217 | 14 | 16 | 17.588 | P | 0.200 | 0.219  |
| SN74 | 2006 | 217 | 14 | 16 | 18.808 | P | 0.200 | -0.168 |
| SN65 | 2006 | 217 | 14 | 16 | 18.136 | P | 0.200 | -0.032 |
| S06C | 2006 | 217 | 14 | 16 | 18.205 | P | 0.200 | -0.138 |
| SAO  | 2006 | 217 | 14 | 16 | 18.318 | P | 0.200 | 0.048  |
| SN84 | 2006 | 217 | 14 | 16 | 19.847 | P | 0.200 | -0.306 |
| PACP | 2006 | 217 | 14 | 16 | 19.195 | P | 0.200 | 0.440  |
| SN85 | 2006 | 217 | 14 | 16 | 20.236 | P | 0.200 | 0.020  |
| SN76 | 2006 | 217 | 14 | 16 | 19.658 | P | 0.200 | 0.272  |
| O09A | 2006 | 217 | 14 | 16 | 19.737 | P | 0.200 | -0.595 |
| Q07A | 2006 | 217 | 14 | 16 | 19.966 | P | 0.200 | 0.378  |
| CMB  | 2006 | 217 | 14 | 16 | 20.008 | P | 0.200 | -0.281 |
| R06C | 2006 | 217 | 14 | 16 | 20.255 | P | 0.200 | 0.481  |
| BMN  | 2006 | 217 | 14 | 16 | 20.516 | P | 0.200 | -0.808 |
| P08A | 2006 | 217 | 14 | 16 | 20.654 | P | 0.200 | 0.018  |
| S04C | 2006 | 217 | 14 | 16 | 20.836 | P | 0.200 | 0.296  |
| SNA4 | 2006 | 217 | 14 | 16 | 22.170 | P | 0.200 | -0.242 |
| SN97 | 2006 | 217 | 14 | 16 | 22.171 | P | 0.200 | 0.390  |
| SN93 | 2006 | 217 | 14 | 16 | 21.206 | P | 0.200 | 0.162  |
| SN96 | 2006 | 217 | 14 | 16 | 21.271 | P | 0.200 | 0.134  |
| SNA3 | 2006 | 217 | 14 | 16 | 22.372 | P | 0.200 | 0.010  |
| SNA5 | 2006 | 217 | 14 | 16 | 22.408 | P | 0.200 | 0.046  |
| MHC  | 2006 | 217 | 14 | 16 | 21.462 | P | 0.200 | 0.447  |
| BNLO | 2006 | 217 | 14 | 16 | 21.643 | P | 0.200 | -0.069 |
| SNA7 | 2006 | 217 | 14 | 16 | 23.135 | P | 0.200 | 0.249  |

|      |      |     |    |    |        |   |       |        |
|------|------|-----|----|----|--------|---|-------|--------|
| P07A | 2006 | 217 | 14 | 16 | 22.239 | P | 0.200 | 0.259  |
| R05C | 2006 | 217 | 14 | 16 | 22.303 | P | 0.200 | 0.071  |
| SNB6 | 2006 | 217 | 14 | 16 | 23.352 | P | 0.200 | 0.121  |
| R04C | 2006 | 217 | 14 | 16 | 22.591 | P | 0.200 | 0.345  |
| O08A | 2006 | 217 | 14 | 16 | 22.644 | P | 0.200 | -0.569 |
| WENL | 2006 | 217 | 14 | 16 | 22.788 | P | 0.200 | 0.733  |
| SNC4 | 2006 | 217 | 14 | 16 | 24.193 | P | 0.200 | -0.258 |
| LAVA | 2006 | 217 | 14 | 16 | 23.421 | P | 0.200 | -0.344 |
| WCN  | 2006 | 217 | 14 | 16 | 23.782 | P | 0.200 | 0.307  |
| SNC3 | 2006 | 217 | 14 | 16 | 24.784 | P | 0.200 | 0.050  |
| N08A | 2006 | 217 | 14 | 16 | 24.093 | P | 0.200 | -0.865 |
| O07A | 2006 | 217 | 14 | 16 | 24.189 | P | 0.200 | -0.150 |
| BDM  | 2006 | 217 | 14 | 16 | 24.227 | P | 0.200 | 0.530  |
| SND5 | 2006 | 217 | 14 | 16 | 25.256 | P | 0.200 | -0.482 |
| BRK  | 2006 | 217 | 14 | 16 | 24.513 | P | 0.200 | 0.221  |
| BRIB | 2006 | 217 | 14 | 16 | 24.593 | P | 0.200 | 0.239  |
| BKS  | 2006 | 217 | 14 | 16 | 24.607 | P | 0.200 | 0.218  |
| P06A | 2006 | 217 | 14 | 16 | 25.276 | P | 0.200 | 0.060  |
| SNE4 | 2006 | 217 | 14 | 16 | 26.644 | P | 0.200 | -0.392 |
| P05C | 2006 | 217 | 14 | 16 | 25.647 | P | 0.200 | 0.185  |
| FARB | 2006 | 217 | 14 | 16 | 25.714 | P | 0.200 | -0.046 |
| Q04C | 2006 | 217 | 14 | 16 | 25.885 | P | 0.200 | 0.279  |
| O06A | 2006 | 217 | 14 | 16 | 26.591 | P | 0.200 | -0.027 |
| N07B | 2006 | 217 | 14 | 16 | 26.659 | P | 0.200 | -0.195 |
| BEK  | 2006 | 217 | 14 | 16 | 26.890 | P | 0.200 | -0.018 |
| MCCM | 2006 | 217 | 14 | 16 | 27.036 | P | 0.200 | 0.155  |
| Q03C | 2006 | 217 | 14 | 16 | 27.159 | P | 0.200 | 0.626  |
| SUTB | 2006 | 217 | 14 | 16 | 27.560 | P | 0.200 | -0.486 |
| O05C | 2006 | 217 | 14 | 16 | 28.441 | P | 0.200 | -0.094 |
| ORV  | 2006 | 217 | 14 | 16 | 28.510 | P | 0.200 | 0.150  |
| N06A | 2006 | 217 | 14 | 16 | 28.629 | P | 0.200 | -0.097 |
| MNRC | 2006 | 217 | 14 | 16 | 28.712 | P | 0.200 | 0.281  |
| M07A | 2006 | 217 | 14 | 16 | 29.398 | P | 0.200 | -0.177 |
| O04C | 2006 | 217 | 14 | 16 | 29.820 | P | 0.200 | -0.460 |
| O03C | 2006 | 217 | 14 | 16 | 30.368 | P | 0.200 | -0.951 |
| ELFS | 2006 | 217 | 14 | 16 | 30.475 | P | 0.200 | -0.142 |
| HOPS | 2006 | 217 | 14 | 16 | 30.791 | P | 0.200 | 0.419  |
| M06C | 2006 | 217 | 14 | 16 | 31.869 | P | 0.200 | -0.005 |
| GASB | 2006 | 217 | 14 | 16 | 32.550 | P | 0.200 | 0.615  |
| L07A | 2006 | 217 | 14 | 16 | 32.559 | P | 0.200 | 0.330  |
| HATC | 2006 | 217 | 14 | 16 | 32.567 | P | 0.200 | -0.372 |
| WDC  | 2006 | 217 | 14 | 16 | 33.280 | P | 0.200 | -1.379 |
| P01C | 2006 | 217 | 14 | 16 | 33.296 | P | 0.200 | 0.417  |
| O02C | 2006 | 217 | 14 | 16 | 33.535 | P | 0.200 | -0.332 |
| M05C | 2006 | 217 | 14 | 16 | 33.730 | P | 0.200 | -0.288 |
| M03C | 2006 | 217 | 14 | 16 | 35.283 | P | 0.200 | -0.813 |
| L05A | 2006 | 217 | 14 | 16 | 35.975 | P | 0.200 | 0.109  |
| M04C | 2006 | 217 | 14 | 16 | 36.883 | P | 0.200 | -0.388 |
| N02C | 2006 | 217 | 14 | 16 | 37.358 | P | 0.200 | -0.122 |
| M02C | 2006 | 217 | 14 | 16 | 37.777 | P | 0.200 | -0.488 |
| L04A | 2006 | 217 | 14 | 16 | 38.264 | P | 0.200 | -0.445 |
| K04A | 2006 | 217 | 14 | 16 | 39.613 | P | 0.200 | -0.259 |
| J05A | 2006 | 217 | 14 | 16 | 41.017 | P | 0.200 | -0.093 |
| K02A | 2006 | 217 | 14 | 16 | 44.455 | P | 0.200 | 0.077  |
| I03A | 2006 | 217 | 14 | 16 | 47.642 | P | 0.200 | -0.155 |

|      |      |     |    |         |           |           |         |        |        |
|------|------|-----|----|---------|-----------|-----------|---------|--------|--------|
| 2006 | 197  | 11  | 42 | 41.7866 | -28.71500 | -72.54300 | 10.0000 | 148    | -0.008 |
| SDD  | 2006 | 197 | 11 | 54      | 25.387    | P         | 0.200   | 0.587  |        |
| BBR  | 2006 | 197 | 11 | 54      | 26.425    | P         | 0.200   | 0.574  |        |
| CIA  | 2006 | 197 | 11 | 54      | 26.698    | P         | 0.200   | 0.232  |        |
| HEC  | 2006 | 197 | 11 | 54      | 26.858    | P         | 0.200   | 0.292  |        |
| FMP  | 2006 | 197 | 11 | 54      | 27.529    | P         | 0.200   | -0.010 |        |
| BFS  | 2006 | 197 | 11 | 54      | 27.990    | P         | 0.200   | 0.016  |        |

|      |      |     |    |    |        |   |       |        |
|------|------|-----|----|----|--------|---|-------|--------|
| RPV  | 2006 | 197 | 11 | 54 | 28.202 | P | 0.200 | 0.315  |
| TUQ  | 2006 | 197 | 11 | 54 | 28.218 | P | 0.200 | 0.201  |
| V11A | 2006 | 197 | 11 | 54 | 28.461 | P | 0.200 | 0.139  |
| ADO  | 2006 | 197 | 11 | 54 | 28.682 | P | 0.200 | 0.161  |
| RRX  | 2006 | 197 | 11 | 54 | 28.911 | P | 0.200 | 0.198  |
| PAS  | 2006 | 197 | 11 | 54 | 29.048 | P | 0.200 | 0.113  |
| MWC  | 2006 | 197 | 11 | 54 | 29.283 | P | 0.200 | 0.201  |
| CHF  | 2006 | 197 | 11 | 54 | 29.612 | P | 0.200 | 0.219  |
| DJJ  | 2006 | 197 | 11 | 54 | 29.879 | P | 0.200 | 0.133  |
| DEC  | 2006 | 197 | 11 | 54 | 30.047 | P | 0.200 | 0.147  |
| GSC  | 2006 | 197 | 11 | 54 | 30.330 | P | 0.200 | 0.257  |
| SHO  | 2006 | 197 | 11 | 54 | 30.939 | P | 0.200 | 0.022  |
| TOV  | 2006 | 197 | 11 | 54 | 31.058 | P | 0.200 | 0.106  |
| U11A | 2006 | 197 | 11 | 54 | 31.148 | P | 0.200 | 0.219  |
| EDW2 | 2006 | 197 | 11 | 54 | 31.393 | P | 0.200 | -0.291 |
| LGU  | 2006 | 197 | 11 | 54 | 31.453 | P | 0.200 | -0.057 |
| OSI  | 2006 | 197 | 11 | 54 | 32.630 | P | 0.200 | -0.080 |
| SCZ2 | 2006 | 197 | 11 | 54 | 32.771 | P | 0.200 | 0.007  |
| LRL  | 2006 | 197 | 11 | 54 | 33.516 | P | 0.200 | 0.183  |
| U10A | 2006 | 197 | 11 | 54 | 33.837 | P | 0.200 | 0.285  |
| SBC  | 2006 | 197 | 11 | 54 | 34.848 | P | 0.200 | -0.021 |
| FUR  | 2006 | 197 | 11 | 54 | 35.303 | P | 0.200 | 0.247  |
| ARV  | 2006 | 197 | 11 | 54 | 35.339 | P | 0.200 | 0.305  |
| MPM  | 2006 | 197 | 11 | 54 | 35.462 | P | 0.200 | 0.019  |
| TPNV | 2006 | 197 | 11 | 54 | 36.140 | P | 0.200 | 0.556  |
| ISA  | 2006 | 197 | 11 | 54 | 36.822 | P | 0.200 | 0.311  |
| BAK  | 2006 | 197 | 11 | 54 | 37.478 | P | 0.200 | 0.528  |
| MPP  | 2006 | 197 | 11 | 54 | 37.529 | P | 0.200 | 0.269  |
| SDP  | 2006 | 197 | 11 | 54 | 37.970 | P | 0.200 | 0.080  |
| VES  | 2006 | 197 | 11 | 54 | 38.767 | P | 0.200 | -0.185 |
| CWC  | 2006 | 197 | 11 | 54 | 39.000 | P | 0.200 | 0.301  |
| GRA  | 2006 | 197 | 11 | 54 | 39.262 | P | 0.200 | 0.339  |
| SMM  | 2006 | 197 | 11 | 54 | 39.906 | P | 0.200 | 0.427  |
| RCT  | 2006 | 197 | 11 | 54 | 40.531 | P | 0.200 | -0.846 |
| PHL  | 2006 | 197 | 11 | 54 | 41.737 | P | 0.200 | 0.121  |
| S09A | 2006 | 197 | 11 | 54 | 41.797 | P | 0.200 | 0.143  |
| HELL | 2006 | 197 | 11 | 54 | 41.915 | P | 0.200 | -0.407 |
| TIN  | 2006 | 197 | 11 | 54 | 41.939 | P | 0.200 | 0.336  |
| V05C | 2006 | 197 | 11 | 54 | 41.978 | P | 0.200 | 0.413  |
| SN11 | 2006 | 197 | 11 | 54 | 42.074 | P | 0.200 | -0.967 |
| R10A | 2006 | 197 | 11 | 54 | 42.076 | P | 0.200 | 0.496  |
| Q11A | 2006 | 197 | 11 | 54 | 42.478 | P | 0.200 | 0.229  |
| SN21 | 2006 | 197 | 11 | 54 | 42.804 | P | 0.200 | -1.328 |
| SN16 | 2006 | 197 | 11 | 54 | 43.212 | P | 0.200 | 0.133  |
| R09A | 2006 | 197 | 11 | 54 | 43.537 | P | 0.200 | -0.006 |
| V04C | 2006 | 197 | 11 | 54 | 43.692 | P | 0.200 | 0.144  |
| SN22 | 2006 | 197 | 11 | 54 | 43.758 | P | 0.200 | -0.954 |
| PKD  | 2006 | 197 | 11 | 54 | 43.785 | P | 0.200 | 0.006  |
| S08C | 2006 | 197 | 11 | 54 | 43.806 | P | 0.200 | 0.206  |
| U05C | 2006 | 197 | 11 | 54 | 43.855 | P | 0.200 | -0.123 |
| SN15 | 2006 | 197 | 11 | 54 | 43.923 | P | 0.200 | -0.003 |
| SN23 | 2006 | 197 | 11 | 54 | 44.462 | P | 0.200 | -0.437 |
| SN25 | 2006 | 197 | 11 | 54 | 44.509 | P | 0.200 | 0.069  |
| SN24 | 2006 | 197 | 11 | 54 | 44.682 | P | 0.200 | -0.174 |
| T06C | 2006 | 197 | 11 | 54 | 44.687 | P | 0.200 | -0.853 |
| SN26 | 2006 | 197 | 11 | 54 | 44.793 | P | 0.200 | 0.120  |
| SN34 | 2006 | 197 | 11 | 54 | 45.397 | P | 0.200 | -0.173 |
| SN36 | 2006 | 197 | 11 | 54 | 45.704 | P | 0.200 | -0.012 |
| SN37 | 2006 | 197 | 11 | 54 | 46.132 | P | 0.200 | 0.331  |
| MLAC | 2006 | 197 | 11 | 54 | 46.310 | P | 0.200 | 0.444  |
| SN44 | 2006 | 197 | 11 | 54 | 46.410 | P | 0.200 | -0.254 |
| Q09A | 2006 | 197 | 11 | 54 | 46.415 | P | 0.200 | 0.070  |
| SN43 | 2006 | 197 | 11 | 54 | 46.427 | P | 0.200 | -0.451 |

|      |      |     |    |    |        |   |       |        |
|------|------|-----|----|----|--------|---|-------|--------|
| SN38 | 2006 | 197 | 11 | 54 | 46.432 | P | 0.200 | 0.213  |
| U04C | 2006 | 197 | 11 | 54 | 46.500 | P | 0.200 | 0.454  |
| V03C | 2006 | 197 | 11 | 54 | 46.646 | P | 0.200 | 0.610  |
| SN52 | 2006 | 197 | 11 | 54 | 46.770 | P | 0.200 | -0.534 |
| R08A | 2006 | 197 | 11 | 54 | 46.856 | P | 0.200 | -0.038 |
| SN45 | 2006 | 197 | 11 | 54 | 47.016 | P | 0.200 | -0.003 |
| SN47 | 2006 | 197 | 11 | 54 | 47.371 | P | 0.200 | 0.375  |
| SN51 | 2006 | 197 | 11 | 54 | 47.443 | P | 0.200 | -0.233 |
| SN48 | 2006 | 197 | 11 | 54 | 47.540 | P | 0.200 | 0.242  |
| P10A | 2006 | 197 | 11 | 54 | 47.878 | P | 0.200 | 0.114  |
| SN54 | 2006 | 197 | 11 | 54 | 48.137 | P | 0.200 | -0.063 |
| Q08A | 2006 | 197 | 11 | 54 | 48.181 | P | 0.200 | -0.185 |
| T05C | 2006 | 197 | 11 | 54 | 48.398 | P | 0.200 | 0.540  |
| SN55 | 2006 | 197 | 11 | 54 | 48.477 | P | 0.200 | 0.002  |
| SN56 | 2006 | 197 | 11 | 54 | 48.663 | P | 0.200 | 0.311  |
| R07C | 2006 | 197 | 11 | 54 | 48.701 | P | 0.200 | 0.375  |
| S05C | 2006 | 197 | 11 | 54 | 48.745 | P | 0.200 | 0.046  |
| SN57 | 2006 | 197 | 11 | 54 | 48.755 | P | 0.200 | 0.320  |
| HAST | 2006 | 197 | 11 | 54 | 48.757 | P | 0.200 | 0.244  |
| P09A | 2006 | 197 | 11 | 54 | 48.943 | P | 0.200 | -0.389 |
| SN64 | 2006 | 197 | 11 | 54 | 49.294 | P | 0.200 | 0.083  |
| S06C | 2006 | 197 | 11 | 54 | 49.625 | P | 0.200 | -0.106 |
| SAO  | 2006 | 197 | 11 | 54 | 49.857 | P | 0.200 | 0.176  |
| SN65 | 2006 | 197 | 11 | 54 | 49.869 | P | 0.200 | 0.349  |
| SN67 | 2006 | 197 | 11 | 54 | 49.879 | P | 0.200 | 0.440  |
| SN71 | 2006 | 197 | 11 | 54 | 49.957 | P | 0.200 | -0.201 |
| SN73 | 2006 | 197 | 11 | 54 | 50.072 | P | 0.200 | -0.136 |
| SN66 | 2006 | 197 | 11 | 54 | 50.089 | P | 0.200 | 0.439  |
| PACP | 2006 | 197 | 11 | 54 | 50.521 | P | 0.200 | 0.306  |
| SN76 | 2006 | 197 | 11 | 54 | 51.109 | P | 0.200 | 0.247  |
| Q07A | 2006 | 197 | 11 | 54 | 51.307 | P | 0.200 | 0.197  |
| SN84 | 2006 | 197 | 11 | 54 | 51.471 | P | 0.200 | -0.235 |
| O09A | 2006 | 197 | 11 | 54 | 51.524 | P | 0.200 | -0.418 |
| CMB  | 2006 | 197 | 11 | 54 | 51.647 | P | 0.200 | -0.205 |
| R06C | 2006 | 197 | 11 | 54 | 51.695 | P | 0.200 | 0.401  |
| SN85 | 2006 | 197 | 11 | 54 | 51.859 | P | 0.200 | 0.092  |
| P08A | 2006 | 197 | 11 | 54 | 52.051 | P | 0.200 | -0.201 |
| S04C | 2006 | 197 | 11 | 54 | 52.426 | P | 0.200 | 0.274  |
| MHC  | 2006 | 197 | 11 | 54 | 53.075 | P | 0.200 | 0.426  |
| BNLO | 2006 | 197 | 11 | 54 | 53.319 | P | 0.200 | -0.092 |
| P07A | 2006 | 197 | 11 | 54 | 53.897 | P | 0.200 | 0.183  |
| R05C | 2006 | 197 | 11 | 54 | 54.087 | P | 0.200 | 0.154  |
| R04C | 2006 | 197 | 11 | 54 | 54.375 | P | 0.200 | 0.357  |
| WENL | 2006 | 197 | 11 | 54 | 54.414 | P | 0.200 | 0.606  |
| O08A | 2006 | 197 | 11 | 54 | 54.458 | P | 0.200 | -0.595 |
| JRSC | 2006 | 197 | 11 | 54 | 54.581 | P | 0.200 | 0.224  |
| LAVA | 2006 | 197 | 11 | 54 | 55.368 | P | 0.200 | -0.267 |
| WCN  | 2006 | 197 | 11 | 54 | 55.641 | P | 0.200 | 0.329  |
| BDM  | 2006 | 197 | 11 | 54 | 56.080 | P | 0.200 | 0.505  |
| O07A | 2006 | 197 | 11 | 54 | 56.152 | P | 0.200 | -0.115 |
| N08A | 2006 | 197 | 11 | 54 | 56.220 | P | 0.200 | -0.732 |
| BRK  | 2006 | 197 | 11 | 54 | 56.434 | P | 0.200 | 0.196  |
| BRIB | 2006 | 197 | 11 | 54 | 56.502 | P | 0.200 | 0.223  |
| BKS  | 2006 | 197 | 11 | 54 | 56.573 | P | 0.200 | 0.253  |
| P06A | 2006 | 197 | 11 | 54 | 57.189 | P | 0.200 | 0.009  |
| FARB | 2006 | 197 | 11 | 54 | 57.610 | P | 0.200 | -0.219 |
| P05C | 2006 | 197 | 11 | 54 | 57.690 | P | 0.200 | 0.217  |
| Q04C | 2006 | 197 | 11 | 54 | 57.851 | P | 0.200 | 0.211  |
| CVS  | 2006 | 197 | 11 | 54 | 58.627 | P | 0.200 | -0.130 |
| N07B | 2006 | 197 | 11 | 54 | 58.652 | P | 0.200 | -0.364 |
| O06A | 2006 | 197 | 11 | 54 | 58.802 | P | 0.200 | 0.047  |
| BEK  | 2006 | 197 | 11 | 54 | 59.064 | P | 0.200 | 0.011  |
| MCCM | 2006 | 197 | 11 | 54 | 59.090 | P | 0.200 | 0.019  |

|      |      |     |    |    |        |   |       |        |
|------|------|-----|----|----|--------|---|-------|--------|
| Q03C | 2006 | 197 | 11 | 54 | 59.407 | P | 0.200 | 0.755  |
| SUTB | 2006 | 197 | 11 | 54 | 59.850 | P | 0.200 | -0.450 |
| ORV  | 2006 | 197 | 11 | 55 | 0.743  | P | 0.200 | 0.079  |
| O05C | 2006 | 197 | 11 | 55 | 0.827  | P | 0.200 | -0.020 |
| N06A | 2006 | 197 | 11 | 55 | 0.998  | P | 0.200 | -0.064 |
| MNRC | 2006 | 197 | 11 | 55 | 1.096  | P | 0.200 | 0.355  |
| M07A | 2006 | 197 | 11 | 55 | 1.708  | P | 0.200 | -0.292 |
| O04C | 2006 | 197 | 11 | 55 | 2.276  | P | 0.200 | -0.473 |
| O03C | 2006 | 197 | 11 | 55 | 2.687  | P | 0.200 | -1.222 |
| ELFS | 2006 | 197 | 11 | 55 | 2.803  | P | 0.200 | -0.298 |
| HOPS | 2006 | 197 | 11 | 55 | 3.277  | P | 0.200 | 0.403  |
| M06C | 2006 | 197 | 11 | 55 | 4.352  | P | 0.200 | -0.174 |
| HATC | 2006 | 197 | 11 | 55 | 5.035  | P | 0.200 | -0.636 |
| GASB | 2006 | 197 | 11 | 55 | 5.070  | P | 0.200 | 0.492  |
| L07A | 2006 | 197 | 11 | 55 | 5.091  | P | 0.200 | 0.172  |
| WDC  | 2006 | 197 | 11 | 55 | 5.966  | P | 0.200 | -1.590 |
| P01C | 2006 | 197 | 11 | 55 | 6.059  | P | 0.200 | 0.455  |
| O02C | 2006 | 197 | 11 | 55 | 6.197  | P | 0.200 | -0.502 |
| M05C | 2006 | 197 | 11 | 55 | 6.415  | P | 0.200 | -0.458 |
| M03C | 2006 | 197 | 11 | 55 | 8.152  | P | 0.200 | -0.974 |
| L05A | 2006 | 197 | 11 | 55 | 8.828  | P | 0.200 | -0.049 |
| O01C | 2006 | 197 | 11 | 55 | 9.826  | P | 0.200 | 0.439  |
| M04C | 2006 | 197 | 11 | 55 | 9.905  | P | 0.200 | -0.507 |
| N02C | 2006 | 197 | 11 | 55 | 10.442 | P | 0.200 | -0.186 |
| M02C | 2006 | 197 | 11 | 55 | 10.937 | P | 0.200 | -0.571 |
| L04A | 2006 | 197 | 11 | 55 | 11.320 | P | 0.200 | -0.676 |
| YBH  | 2006 | 197 | 11 | 55 | 11.486 | P | 0.200 | -0.872 |
| JCC  | 2006 | 197 | 11 | 55 | 12.486 | P | 0.200 | 0.129  |
| K04A | 2006 | 197 | 11 | 55 | 12.721 | P | 0.200 | -0.539 |
| HUMO | 2006 | 197 | 11 | 55 | 15.551 | P | 0.200 | -0.595 |
| L02A | 2006 | 197 | 11 | 55 | 16.074 | P | 0.200 | -0.064 |
| M01C | 2006 | 197 | 11 | 55 | 16.332 | P | 0.200 | -0.053 |
| K02A | 2006 | 197 | 11 | 55 | 17.966 | P | 0.200 | -0.172 |
| J03A | 2006 | 197 | 11 | 55 | 18.522 | P | 0.200 | -0.417 |
| DBO  | 2006 | 197 | 11 | 55 | 18.538 | P | 0.200 | -0.151 |
| J02A | 2006 | 197 | 11 | 55 | 20.245 | P | 0.200 | -0.043 |
| K01A | 2006 | 197 | 11 | 55 | 20.720 | P | 0.200 | 0.092  |
| I03A | 2006 | 197 | 11 | 55 | 21.514 | P | 0.200 | -0.302 |

|      |      |     |    |         |           |           |          |        |       |
|------|------|-----|----|---------|-----------|-----------|----------|--------|-------|
| 2006 | 273  | 16  | 26 | 57.0534 | -15.58800 | -73.15900 | 106.6000 | 225    | 0.003 |
| SVD  | 2006 | 273 | 16 | 37      | 24.300    | P         | 0.200    | 0.201  |       |
| HEC  | 2006 | 273 | 16 | 37      | 24.452    | P         | 0.200    | 0.071  |       |
| BBR  | 2006 | 273 | 16 | 37      | 24.533    | P         | 0.200    | 0.266  |       |
| V11A | 2006 | 273 | 16 | 37      | 25.087    | P         | 0.200    | -0.273 |       |
| TUQ  | 2006 | 273 | 16 | 37      | 25.283    | P         | 0.200    | -0.204 |       |
| CIA  | 2006 | 273 | 16 | 37      | 26.139    | P         | 0.200    | -0.248 |       |
| BFS  | 2006 | 273 | 16 | 37      | 26.696    | P         | 0.200    | -0.388 |       |
| VTV  | 2006 | 273 | 16 | 37      | 26.795    | P         | 0.200    | -0.316 |       |
| RRX  | 2006 | 273 | 16 | 37      | 27.170    | P         | 0.200    | 0.009  |       |
| ADO  | 2006 | 273 | 16 | 37      | 27.310    | P         | 0.200    | -0.102 |       |
| U11A | 2006 | 273 | 16 | 37      | 27.760    | P         | 0.200    | -0.152 |       |
| GSC  | 2006 | 273 | 16 | 37      | 28.255    | P         | 0.200    | -0.069 |       |
| SHO  | 2006 | 273 | 16 | 37      | 28.434    | P         | 0.200    | -0.281 |       |
| PAS  | 2006 | 273 | 16 | 37      | 28.444    | P         | 0.200    | -0.109 |       |
| MWC  | 2006 | 273 | 16 | 37      | 28.467    | P         | 0.200    | -0.106 |       |
| CHF  | 2006 | 273 | 16 | 37      | 28.808    | P         | 0.200    | -0.061 |       |
| DEC  | 2006 | 273 | 16 | 37      | 29.489    | P         | 0.200    | -0.182 |       |
| DJJ  | 2006 | 273 | 16 | 37      | 29.496    | P         | 0.200    | -0.113 |       |
| VCS  | 2006 | 273 | 16 | 37      | 29.565    | P         | 0.200    | -0.367 |       |
| EDW2 | 2006 | 273 | 16 | 37      | 30.580    | P         | 0.200    | -0.497 |       |
| TOV  | 2006 | 273 | 16 | 37      | 31.017    | P         | 0.200    | -0.163 |       |
| U10A | 2006 | 273 | 16 | 37      | 31.545    | P         | 0.200    | 0.179  |       |
| SLA  | 2006 | 273 | 16 | 37      | 32.304    | P         | 0.200    | -0.347 |       |

|      |      |     |    |    |        |   |       |        |
|------|------|-----|----|----|--------|---|-------|--------|
| LRL  | 2006 | 273 | 16 | 37 | 32.344 | P | 0.200 | -0.082 |
| OSI  | 2006 | 273 | 16 | 37 | 32.363 | P | 0.200 | -0.445 |
| SCZ2 | 2006 | 273 | 16 | 37 | 33.266 | P | 0.200 | -0.530 |
| FUR  | 2006 | 273 | 16 | 37 | 33.390 | P | 0.200 | -0.008 |
| MPM  | 2006 | 273 | 16 | 37 | 33.857 | P | 0.200 | -0.459 |
| ARV  | 2006 | 273 | 16 | 37 | 35.238 | P | 0.200 | 0.030  |
| ISA  | 2006 | 273 | 16 | 37 | 36.220 | P | 0.200 | -0.077 |
| GRA  | 2006 | 273 | 16 | 37 | 38.111 | P | 0.200 | 0.382  |
| MPP  | 2006 | 273 | 16 | 37 | 38.156 | P | 0.200 | -0.202 |
| CWC  | 2006 | 273 | 16 | 37 | 38.178 | P | 0.200 | 0.053  |
| VES  | 2006 | 273 | 16 | 37 | 39.015 | P | 0.200 | -0.261 |
| Q11A | 2006 | 273 | 16 | 37 | 39.783 | P | 0.200 | 0.110  |
| R10A | 2006 | 273 | 16 | 37 | 40.174 | P | 0.200 | 0.663  |
| S09A | 2006 | 273 | 16 | 37 | 40.301 | P | 0.200 | -0.058 |
| SMM  | 2006 | 273 | 16 | 37 | 40.767 | P | 0.200 | 0.061  |
| RCT  | 2006 | 273 | 16 | 37 | 40.857 | P | 0.200 | -0.969 |
| TIN  | 2006 | 273 | 16 | 37 | 41.403 | P | 0.200 | 0.232  |
| TPH  | 2006 | 273 | 16 | 37 | 41.914 | P | 0.200 | 0.009  |
| R09A | 2006 | 273 | 16 | 37 | 42.141 | P | 0.200 | 0.007  |
| HELL | 2006 | 273 | 16 | 37 | 42.234 | P | 0.200 | -0.357 |
| V05C | 2006 | 273 | 16 | 37 | 42.718 | P | 0.200 | 0.075  |
| PHL  | 2006 | 273 | 16 | 37 | 43.195 | P | 0.200 | -0.111 |
| S08C | 2006 | 273 | 16 | 37 | 43.277 | P | 0.200 | 0.146  |
| PKD  | 2006 | 273 | 16 | 37 | 45.050 | P | 0.200 | -0.363 |
| Q09A | 2006 | 273 | 16 | 37 | 45.107 | P | 0.200 | 0.027  |
| T06C | 2006 | 273 | 16 | 37 | 45.109 | P | 0.200 | -1.303 |
| RAMR | 2006 | 273 | 16 | 37 | 45.478 | P | 0.200 | -0.025 |
| SN43 | 2006 | 273 | 16 | 37 | 46.797 | P | 0.200 | -0.743 |
| MLAC | 2006 | 273 | 16 | 37 | 46.064 | P | 0.200 | 0.095  |
| R08A | 2006 | 273 | 16 | 37 | 46.403 | P | 0.200 | 0.064  |
| Q08A | 2006 | 273 | 16 | 37 | 47.659 | P | 0.200 | -0.068 |
| U04C | 2006 | 273 | 16 | 37 | 47.855 | P | 0.200 | -0.060 |
| P09A | 2006 | 273 | 16 | 37 | 47.916 | P | 0.200 | -0.134 |
| SN55 | 2006 | 273 | 16 | 37 | 49.016 | P | 0.200 | 0.012  |
| V03C | 2006 | 273 | 16 | 37 | 48.683 | P | 0.200 | 0.343  |
| R07C | 2006 | 273 | 16 | 37 | 48.996 | P | 0.200 | 0.384  |
| T05C | 2006 | 273 | 16 | 37 | 49.779 | P | 0.200 | 0.182  |
| S05C | 2006 | 273 | 16 | 37 | 50.008 | P | 0.200 | -0.101 |
| S06C | 2006 | 273 | 16 | 37 | 50.612 | P | 0.200 | -0.101 |
| O09A | 2006 | 273 | 16 | 37 | 50.657 | P | 0.200 | -0.155 |
| HAST | 2006 | 273 | 16 | 37 | 51.050 | P | 0.200 | -0.009 |
| Q07A | 2006 | 273 | 16 | 37 | 51.481 | P | 0.200 | 0.249  |
| BMN  | 2006 | 273 | 16 | 37 | 51.539 | P | 0.200 | -0.421 |
| P08A | 2006 | 273 | 16 | 37 | 51.818 | P | 0.200 | 0.021  |
| SAO  | 2006 | 273 | 16 | 37 | 52.032 | P | 0.200 | -0.080 |
| R06C | 2006 | 273 | 16 | 37 | 52.449 | P | 0.200 | 0.521  |
| PACP | 2006 | 273 | 16 | 37 | 52.740 | P | 0.200 | 0.265  |
| CMB  | 2006 | 273 | 16 | 37 | 53.000 | P | 0.200 | -0.265 |
| SN97 | 2006 | 273 | 16 | 37 | 54.945 | P | 0.200 | 0.528  |
| P07A | 2006 | 273 | 16 | 37 | 54.224 | P | 0.200 | 0.299  |
| O08A | 2006 | 273 | 16 | 37 | 54.243 | P | 0.200 | -0.477 |
| SNA8 | 2006 | 273 | 16 | 37 | 55.246 | P | 0.200 | 0.395  |
| SN96 | 2006 | 273 | 16 | 37 | 54.284 | P | 0.200 | 0.374  |
| SN93 | 2006 | 273 | 16 | 37 | 54.472 | P | 0.200 | 0.113  |
| S04C | 2006 | 273 | 16 | 37 | 54.608 | P | 0.200 | 0.174  |
| SNA4 | 2006 | 273 | 16 | 37 | 55.722 | P | 0.200 | 0.035  |
| SNA3 | 2006 | 273 | 16 | 37 | 55.923 | P | 0.200 | 0.123  |
| SNA7 | 2006 | 273 | 16 | 37 | 56.175 | P | 0.200 | 0.543  |
| R05C | 2006 | 273 | 16 | 37 | 55.428 | P | 0.200 | 0.338  |
| MHC  | 2006 | 273 | 16 | 37 | 55.641 | P | 0.200 | 0.432  |
| SNB5 | 2006 | 273 | 16 | 37 | 57.043 | P | 0.200 | -0.076 |
| O07A | 2006 | 273 | 16 | 37 | 56.167 | P | 0.200 | -0.335 |
| SNB7 | 2006 | 273 | 16 | 37 | 57.176 | P | 0.200 | 0.541  |

|      |      |     |    |    |        |   |       |        |
|------|------|-----|----|----|--------|---|-------|--------|
| N08A | 2006 | 273 | 16 | 37 | 56.191 | P | 0.200 | -0.432 |
| BNLO | 2006 | 273 | 16 | 37 | 56.313 | P | 0.200 | -0.118 |
| R04C | 2006 | 273 | 16 | 37 | 56.500 | P | 0.200 | 0.549  |
| SNB3 | 2006 | 273 | 16 | 37 | 57.512 | P | 0.200 | 0.073  |
| WCN  | 2006 | 273 | 16 | 37 | 56.781 | P | 0.200 | 0.564  |
| SNC6 | 2006 | 273 | 16 | 37 | 58.082 | P | 0.200 | 0.297  |
| SNC4 | 2006 | 273 | 16 | 37 | 58.103 | P | 0.200 | -0.242 |
| WENL | 2006 | 273 | 16 | 37 | 57.116 | P | 0.200 | 0.642  |
| LAVA | 2006 | 273 | 16 | 37 | 57.225 | P | 0.200 | -0.150 |
| SNC5 | 2006 | 273 | 16 | 37 | 58.363 | P | 0.200 | -0.204 |
| JRSC | 2006 | 273 | 16 | 37 | 57.665 | P | 0.200 | 0.211  |
| SNC7 | 2006 | 273 | 16 | 37 | 58.865 | P | 0.200 | 0.271  |
| SND8 | 2006 | 273 | 16 | 37 | 59.441 | P | 0.200 | 0.193  |
| P06A | 2006 | 273 | 16 | 37 | 58.465 | P | 0.200 | 0.260  |
| SND5 | 2006 | 273 | 16 | 37 | 59.560 | P | 0.200 | -0.165 |
| BDM  | 2006 | 273 | 16 | 37 | 58.864 | P | 0.200 | 0.565  |
| N07B | 2006 | 273 | 16 | 37 | 58.899 | P | 0.200 | -0.495 |
| SNC3 | 2006 | 273 | 16 | 37 | 59.261 | P | 0.200 | 0.466  |
| BRIB | 2006 | 273 | 16 | 37 | 59.485 | P | 0.200 | 0.256  |
| BRK  | 2006 | 273 | 16 | 37 | 59.514 | P | 0.200 | 0.194  |
| SND4 | 2006 | 273 | 16 | 37 | 59.540 | P | 0.200 | -0.409 |
| P05C | 2006 | 273 | 16 | 37 | 59.594 | P | 0.200 | 0.457  |
| BKS  | 2006 | 273 | 16 | 37 | 59.630 | P | 0.200 | 0.249  |
| SND7 | 2006 | 273 | 16 | 38 | 0.771  | P | 0.200 | 0.387  |
| SNE6 | 2006 | 273 | 16 | 38 | 0.887  | P | 0.200 | 0.181  |
| SNE4 | 2006 | 273 | 16 | 38 | 1.206  | P | 0.200 | -0.209 |
| SNE5 | 2006 | 273 | 16 | 38 | 1.233  | P | 0.200 | -0.133 |
| O06A | 2006 | 273 | 16 | 38 | 0.247  | P | 0.200 | 0.462  |
| Q04C | 2006 | 273 | 16 | 38 | 0.250  | P | 0.200 | 0.318  |
| BEK  | 2006 | 273 | 16 | 38 | 0.732  | P | 0.200 | 0.219  |
| SNE7 | 2006 | 273 | 16 | 38 | 2.021  | P | 0.200 | 0.361  |
| SNF6 | 2006 | 273 | 16 | 38 | 2.259  | P | 0.200 | -0.195 |
| FARB | 2006 | 273 | 16 | 38 | 1.292  | P | 0.200 | -0.273 |
| CVS  | 2006 | 273 | 16 | 38 | 1.808  | P | 0.200 | -0.183 |
| N06A | 2006 | 273 | 16 | 38 | 2.191  | P | 0.200 | 0.053  |
| M07A | 2006 | 273 | 16 | 38 | 2.278  | P | 0.200 | -0.315 |
| Q03C | 2006 | 273 | 16 | 38 | 2.301  | P | 0.200 | 0.823  |
| MCCM | 2006 | 273 | 16 | 38 | 2.642  | P | 0.200 | -0.054 |
| SUTB | 2006 | 273 | 16 | 38 | 2.644  | P | 0.200 | -0.287 |
| SNG5 | 2006 | 273 | 16 | 38 | 3.989  | P | 0.200 | -0.054 |
| O05C | 2006 | 273 | 16 | 38 | 3.211  | P | 0.200 | 0.444  |
| ORV  | 2006 | 273 | 16 | 38 | 3.451  | P | 0.200 | 0.394  |
| MNRC | 2006 | 273 | 16 | 38 | 4.399  | P | 0.200 | 0.461  |
| O04C | 2006 | 273 | 16 | 38 | 4.762  | P | 0.200 | -0.074 |
| ELFS | 2006 | 273 | 16 | 38 | 5.063  | P | 0.200 | 0.188  |
| L07A | 2006 | 273 | 16 | 38 | 5.917  | P | 0.200 | 0.192  |
| M06C | 2006 | 273 | 16 | 38 | 6.349  | P | 0.200 | 0.188  |
| HOPS | 2006 | 273 | 16 | 38 | 7.060  | P | 0.200 | 0.455  |
| HATC | 2006 | 273 | 16 | 38 | 7.801  | P | 0.200 | -0.261 |
| GASB | 2006 | 273 | 16 | 38 | 8.592  | P | 0.200 | 0.594  |
| M05C | 2006 | 273 | 16 | 38 | 8.960  | P | 0.200 | -0.103 |
| WDC  | 2006 | 273 | 16 | 38 | 9.003  | P | 0.200 | -1.825 |
| O02C | 2006 | 273 | 16 | 38 | 9.530  | P | 0.200 | -0.640 |
| P01C | 2006 | 273 | 16 | 38 | 9.902  | P | 0.200 | 0.376  |
| L05A | 2006 | 273 | 16 | 38 | 11.181 | P | 0.200 | 0.325  |
| M03C | 2006 | 273 | 16 | 38 | 11.275 | P | 0.200 | -0.809 |
| M04C | 2006 | 273 | 16 | 38 | 12.932 | P | 0.200 | -0.205 |
| K05A | 2006 | 273 | 16 | 38 | 14.101 | P | 0.200 | 0.312  |
| M02C | 2006 | 273 | 16 | 38 | 14.303 | P | 0.200 | -0.739 |
| O01C | 2006 | 273 | 16 | 38 | 14.309 | P | 0.200 | 0.614  |
| N02C | 2006 | 273 | 16 | 38 | 14.407 | P | 0.200 | -0.089 |
| L04A | 2006 | 273 | 16 | 38 | 14.517 | P | 0.200 | -0.292 |
| YBH  | 2006 | 273 | 16 | 38 | 14.604 | P | 0.200 | -1.193 |

|      |      |     |    |    |        |   |       |        |
|------|------|-----|----|----|--------|---|-------|--------|
| K04A | 2006 | 273 | 16 | 38 | 15.831 | P | 0.200 | -0.146 |
| J05A | 2006 | 273 | 16 | 38 | 17.086 | P | 0.200 | 0.085  |
| JCC  | 2006 | 273 | 16 | 38 | 17.140 | P | 0.200 | 0.320  |
| L02A | 2006 | 273 | 16 | 38 | 20.421 | P | 0.200 | 0.110  |
| M01C | 2006 | 273 | 16 | 38 | 21.279 | P | 0.200 | 0.335  |
| K02A | 2006 | 273 | 16 | 38 | 22.159 | P | 0.200 | -0.104 |
| DBO  | 2006 | 273 | 16 | 38 | 22.814 | P | 0.200 | 0.172  |
| J02A | 2006 | 273 | 16 | 38 | 24.995 | P | 0.200 | 0.488  |

|      |     |    |    |         |           |           |          |     |       |
|------|-----|----|----|---------|-----------|-----------|----------|-----|-------|
| 2006 | 311 | 13 | 25 | 37.1493 | -21.72900 | -68.20400 | 121.3000 | 239 | 0.014 |
|------|-----|----|----|---------|-----------|-----------|----------|-----|-------|

|      |      |     |    |    |        |   |       |        |
|------|------|-----|----|----|--------|---|-------|--------|
| SVD  | 2006 | 311 | 13 | 36 | 50.687 | P | 0.200 | 0.323  |
| HEC  | 2006 | 311 | 13 | 36 | 51.002 | P | 0.200 | 0.324  |
| BBR  | 2006 | 311 | 13 | 36 | 51.029 | P | 0.200 | 0.486  |
| V11A | 2006 | 311 | 13 | 36 | 51.709 | P | 0.200 | 0.151  |
| TUQ  | 2006 | 311 | 13 | 36 | 51.847 | P | 0.200 | 0.178  |
| CIA  | 2006 | 311 | 13 | 36 | 52.368 | P | 0.200 | -0.024 |
| BFS  | 2006 | 311 | 13 | 36 | 52.429 | P | 0.200 | -0.673 |
| VTV  | 2006 | 311 | 13 | 36 | 52.936 | P | 0.200 | -0.204 |
| FMP  | 2006 | 311 | 13 | 36 | 53.149 | P | 0.200 | -0.091 |
| RRX  | 2006 | 311 | 13 | 36 | 53.468 | P | 0.200 | 0.270  |
| ADO  | 2006 | 311 | 13 | 36 | 53.567 | P | 0.200 | 0.174  |
| RPV  | 2006 | 311 | 13 | 36 | 53.622 | P | 0.200 | -0.024 |
| U11A | 2006 | 311 | 13 | 36 | 54.316 | P | 0.200 | 0.395  |
| MWC  | 2006 | 311 | 13 | 36 | 54.506 | P | 0.200 | 0.076  |
| SHO  | 2006 | 311 | 13 | 36 | 54.700 | P | 0.200 | 0.102  |
| CHF  | 2006 | 311 | 13 | 36 | 54.722 | P | 0.200 | 0.029  |
| DJJ  | 2006 | 311 | 13 | 36 | 55.376 | P | 0.200 | 0.006  |
| DEC  | 2006 | 311 | 13 | 36 | 55.415 | P | 0.200 | 0.005  |
| VCS  | 2006 | 311 | 13 | 36 | 55.443 | P | 0.200 | -0.247 |
| SNCC | 2006 | 311 | 13 | 36 | 55.564 | P | 0.200 | -0.261 |
| EDW2 | 2006 | 311 | 13 | 36 | 56.365 | P | 0.200 | -0.369 |
| LGU  | 2006 | 311 | 13 | 36 | 57.293 | P | 0.200 | -0.197 |
| OSI  | 2006 | 311 | 13 | 36 | 57.969 | P | 0.200 | -0.319 |
| LRL  | 2006 | 311 | 13 | 36 | 58.078 | P | 0.200 | 0.100  |
| SLA  | 2006 | 311 | 13 | 36 | 58.127 | P | 0.200 | -0.073 |
| SCZ2 | 2006 | 311 | 13 | 36 | 58.926 | P | 0.200 | -0.185 |
| FUR  | 2006 | 311 | 13 | 36 | 59.290 | P | 0.200 | 0.425  |
| MPM  | 2006 | 311 | 13 | 36 | 59.497 | P | 0.200 | -0.246 |
| ARV  | 2006 | 311 | 13 | 37 | 0.779  | P | 0.200 | 0.320  |
| SBC  | 2006 | 311 | 13 | 37 | 0.958  | P | 0.200 | -0.108 |
| ISA  | 2006 | 311 | 13 | 37 | 1.604  | P | 0.200 | 0.092  |
| GRA  | 2006 | 311 | 13 | 37 | 3.188  | P | 0.200 | 0.359  |
| MPP  | 2006 | 311 | 13 | 37 | 3.457  | P | 0.200 | 0.144  |
| CWC  | 2006 | 311 | 13 | 37 | 3.470  | P | 0.200 | 0.273  |
| VES  | 2006 | 311 | 13 | 37 | 4.114  | P | 0.200 | -0.098 |
| Q11A | 2006 | 311 | 13 | 37 | 5.008  | P | 0.200 | 0.429  |
| R10A | 2006 | 311 | 13 | 37 | 5.283  | P | 0.200 | 0.834  |
| S09A | 2006 | 311 | 13 | 37 | 5.342  | P | 0.200 | 0.120  |
| RCT  | 2006 | 311 | 13 | 37 | 5.584  | P | 0.200 | -0.961 |
| TIN  | 2006 | 311 | 13 | 37 | 6.364  | P | 0.200 | 0.414  |
| TPH  | 2006 | 311 | 13 | 37 | 6.767  | P | 0.200 | 0.141  |
| HELL | 2006 | 311 | 13 | 37 | 6.906  | P | 0.200 | -0.316 |
| R09A | 2006 | 311 | 13 | 37 | 6.927  | P | 0.200 | 0.087  |
| V05C | 2006 | 311 | 13 | 37 | 7.356  | P | 0.200 | 0.088  |
| PHL  | 2006 | 311 | 13 | 37 | 7.845  | P | 0.200 | 0.001  |
| S08C | 2006 | 311 | 13 | 37 | 7.891  | P | 0.200 | 0.132  |
| U05C | 2006 | 311 | 13 | 37 | 9.215  | P | 0.200 | -0.391 |
| PKD  | 2006 | 311 | 13 | 37 | 9.473  | P | 0.200 | -0.298 |
| T06C | 2006 | 311 | 13 | 37 | 9.520  | P | 0.200 | -1.176 |
| Q09A | 2006 | 311 | 13 | 37 | 9.769  | P | 0.200 | 0.252  |
| RAMR | 2006 | 311 | 13 | 37 | 9.929  | P | 0.200 | 0.084  |
| SN43 | 2006 | 311 | 13 | 37 | 11.090 | P | 0.200 | -0.673 |
| MLAC | 2006 | 311 | 13 | 37 | 10.652 | P | 0.200 | 0.319  |



|      |      |     |    |    |        |   |       |        |
|------|------|-----|----|----|--------|---|-------|--------|
| R08A | 2006 | 311 | 13 | 37 | 10.761 | P | 0.200 | 0.063  |
| P10A | 2006 | 311 | 13 | 37 | 10.856 | P | 0.200 | 0.562  |
| Q08A | 2006 | 311 | 13 | 37 | 11.721 | P | 0.200 | -0.199 |
| P09A | 2006 | 311 | 13 | 37 | 12.147 | P | 0.200 | -0.077 |
| U04C | 2006 | 311 | 13 | 37 | 12.197 | P | 0.200 | 0.167  |
| V03C | 2006 | 311 | 13 | 37 | 12.868 | P | 0.200 | 0.469  |
| R07C | 2006 | 311 | 13 | 37 | 13.140 | P | 0.200 | 0.402  |
| T05C | 2006 | 311 | 13 | 37 | 13.930 | P | 0.200 | 0.354  |
| O09A | 2006 | 311 | 13 | 37 | 14.565 | P | 0.200 | -0.132 |
| S06C | 2006 | 311 | 13 | 37 | 14.607 | P | 0.200 | -0.039 |
| HAST | 2006 | 311 | 13 | 37 | 14.844 | P | 0.200 | -0.039 |
| Q07A | 2006 | 311 | 13 | 37 | 15.579 | P | 0.200 | 0.481  |
| SAO  | 2006 | 311 | 13 | 37 | 15.640 | P | 0.200 | -0.206 |
| P08A | 2006 | 311 | 13 | 37 | 15.949 | P | 0.200 | 0.330  |
| R06C | 2006 | 311 | 13 | 37 | 16.343 | P | 0.200 | 0.588  |
| PACP | 2006 | 311 | 13 | 37 | 16.426 | P | 0.200 | 0.247  |
| CMB  | 2006 | 311 | 13 | 37 | 16.601 | P | 0.200 | -0.356 |
| SN97 | 2006 | 311 | 13 | 37 | 18.561 | P | 0.200 | 0.556  |
| SN96 | 2006 | 311 | 13 | 37 | 17.743 | P | 0.200 | 0.196  |
| SNA8 | 2006 | 311 | 13 | 37 | 18.821 | P | 0.200 | 0.413  |
| O08A | 2006 | 311 | 13 | 37 | 17.858 | P | 0.200 | -0.399 |
| SN93 | 2006 | 311 | 13 | 37 | 17.954 | P | 0.200 | 0.052  |
| SNA4 | 2006 | 311 | 13 | 37 | 19.001 | P | 0.200 | -0.150 |
| P07A | 2006 | 311 | 13 | 37 | 18.010 | P | 0.200 | 0.472  |
| S04C | 2006 | 311 | 13 | 37 | 18.109 | P | 0.200 | 0.157  |
| SNA3 | 2006 | 311 | 13 | 37 | 19.285 | P | 0.200 | 0.038  |
| SNA7 | 2006 | 311 | 13 | 37 | 19.485 | P | 0.200 | 0.345  |
| R05C | 2006 | 311 | 13 | 37 | 18.842 | P | 0.200 | 0.198  |
| MHC  | 2006 | 311 | 13 | 37 | 18.982 | P | 0.200 | 0.307  |
| N08A | 2006 | 311 | 13 | 37 | 19.110 | P | 0.200 | -0.877 |
| SNB7 | 2006 | 311 | 13 | 37 | 20.432 | P | 0.200 | 0.414  |
| BNLO | 2006 | 311 | 13 | 37 | 19.527 | P | 0.200 | -0.252 |
| O07A | 2006 | 311 | 13 | 37 | 19.659 | P | 0.200 | -0.212 |
| SNB3 | 2006 | 311 | 13 | 37 | 20.710 | P | 0.200 | -0.010 |
| R04C | 2006 | 311 | 13 | 37 | 19.777 | P | 0.200 | 0.434  |
| WCN  | 2006 | 311 | 13 | 37 | 20.126 | P | 0.200 | 0.477  |
| SNC4 | 2006 | 311 | 13 | 37 | 21.211 | P | 0.200 | -0.314 |
| WENL | 2006 | 311 | 13 | 37 | 20.370 | P | 0.200 | 0.579  |
| LAVA | 2006 | 311 | 13 | 37 | 20.390 | P | 0.200 | -0.285 |
| SNC5 | 2006 | 311 | 13 | 37 | 21.424 | P | 0.200 | -0.344 |
| SNC3 | 2006 | 311 | 13 | 37 | 21.637 | P | 0.200 | -0.329 |
| JRSC | 2006 | 311 | 13 | 37 | 20.664 | P | 0.200 | -0.012 |
| SNC7 | 2006 | 311 | 13 | 37 | 22.043 | P | 0.200 | 0.227  |
| SND5 | 2006 | 311 | 13 | 37 | 22.398 | P | 0.200 | -0.384 |
| SND8 | 2006 | 311 | 13 | 37 | 22.597 | P | 0.200 | 0.201  |
| P06A | 2006 | 311 | 13 | 37 | 21.618 | P | 0.200 | 0.155  |
| BDM  | 2006 | 311 | 13 | 37 | 21.964 | P | 0.200 | 0.479  |
| N07B | 2006 | 311 | 13 | 37 | 22.262 | P | 0.200 | -0.233 |
| SNE9 | 2006 | 311 | 13 | 37 | 23.399 | P | 0.200 | -0.249 |
| BRK  | 2006 | 311 | 13 | 37 | 22.447 | P | 0.200 | 0.071  |
| BRIB | 2006 | 311 | 13 | 37 | 22.493 | P | 0.200 | 0.170  |
| SND4 | 2006 | 311 | 13 | 37 | 22.503 | P | 0.200 | -0.487 |
| BKS  | 2006 | 311 | 13 | 37 | 22.521 | P | 0.200 | 0.061  |
| SND7 | 2006 | 311 | 13 | 37 | 23.569 | P | 0.200 | 0.153  |
| P05C | 2006 | 311 | 13 | 37 | 22.653 | P | 0.200 | 0.381  |
| SNE6 | 2006 | 311 | 13 | 37 | 23.749 | P | 0.200 | 0.048  |
| SNE4 | 2006 | 311 | 13 | 37 | 23.986 | P | 0.200 | -0.351 |
| O06A | 2006 | 311 | 13 | 37 | 23.034 | P | 0.200 | 0.186  |
| SNE5 | 2006 | 311 | 13 | 37 | 24.172 | P | 0.200 | -0.102 |
| Q04C | 2006 | 311 | 13 | 37 | 23.313 | P | 0.200 | 0.338  |
| BEK  | 2006 | 311 | 13 | 37 | 23.710 | P | 0.200 | 0.197  |
| SNF6 | 2006 | 311 | 13 | 37 | 24.962 | P | 0.200 | -0.329 |
| FARB | 2006 | 311 | 13 | 37 | 24.059 | P | 0.200 | -0.344 |

|      |      |     |    |    |        |   |       |        |
|------|------|-----|----|----|--------|---|-------|--------|
| CVS  | 2006 | 311 | 13 | 37 | 24.457 | P | 0.200 | -0.353 |
| SNF9 | 2006 | 311 | 13 | 37 | 24.773 | P | 0.200 | -0.070 |
| Q03C | 2006 | 311 | 13 | 37 | 25.011 | P | 0.200 | 0.642  |
| N06A | 2006 | 311 | 13 | 37 | 25.096 | P | 0.200 | 0.130  |
| SUTB | 2006 | 311 | 13 | 37 | 25.274 | P | 0.200 | -0.417 |
| M07A | 2006 | 311 | 13 | 37 | 25.281 | P | 0.200 | -0.085 |
| MCCM | 2006 | 311 | 13 | 37 | 25.304 | P | 0.200 | -0.108 |
| SNG5 | 2006 | 311 | 13 | 37 | 26.479 | P | 0.200 | -0.238 |
| O05C | 2006 | 311 | 13 | 37 | 25.767 | P | 0.200 | 0.229  |
| ORV  | 2006 | 311 | 13 | 37 | 26.111 | P | 0.200 | 0.319  |
| MNRC | 2006 | 311 | 13 | 37 | 26.769 | P | 0.200 | 0.192  |
| O04C | 2006 | 311 | 13 | 37 | 27.177 | P | 0.200 | -0.242 |
| ELFS | 2006 | 311 | 13 | 37 | 27.531 | P | 0.200 | 0.045  |
| O03C | 2006 | 311 | 13 | 37 | 27.958 | P | 0.200 | -1.184 |
| L07A | 2006 | 311 | 13 | 37 | 28.658 | P | 0.200 | 0.463  |
| M06C | 2006 | 311 | 13 | 37 | 28.769 | P | 0.200 | 0.168  |
| HOPS | 2006 | 311 | 13 | 37 | 29.314 | P | 0.200 | 0.338  |
| HATC | 2006 | 311 | 13 | 37 | 30.002 | P | 0.200 | -0.347 |
| GASB | 2006 | 311 | 13 | 37 | 30.692 | P | 0.200 | 0.420  |
| WDC  | 2006 | 311 | 13 | 37 | 31.079 | P | 0.200 | -1.763 |
| M05C | 2006 | 311 | 13 | 37 | 31.155 | P | 0.200 | -0.078 |
| O02C | 2006 | 311 | 13 | 37 | 31.567 | P | 0.200 | -0.663 |
| P01C | 2006 | 311 | 13 | 37 | 31.946 | P | 0.200 | 0.293  |
| M03C | 2006 | 311 | 13 | 37 | 33.083 | P | 0.200 | -0.885 |
| L05A | 2006 | 311 | 13 | 37 | 33.153 | P | 0.200 | 0.290  |
| M04C | 2006 | 311 | 13 | 37 | 34.638 | P | 0.200 | -0.301 |
| O01C | 2006 | 311 | 13 | 37 | 35.796 | P | 0.200 | 0.368  |
| K05A | 2006 | 311 | 13 | 37 | 35.930 | P | 0.200 | 0.401  |
| M02C | 2006 | 311 | 13 | 37 | 35.973 | P | 0.200 | -0.677 |
| N02C | 2006 | 311 | 13 | 37 | 36.032 | P | 0.200 | -0.139 |
| YBH  | 2006 | 311 | 13 | 37 | 36.044 | P | 0.200 | -1.275 |
| L04A | 2006 | 311 | 13 | 37 | 36.153 | P | 0.200 | -0.276 |
| K04A | 2006 | 311 | 13 | 37 | 37.245 | P | 0.200 | -0.239 |
| JCC  | 2006 | 311 | 13 | 37 | 38.414 | P | 0.200 | 0.178  |
| J05A | 2006 | 311 | 13 | 37 | 38.433 | P | 0.200 | 0.028  |
| L02A | 2006 | 311 | 13 | 37 | 41.504 | P | 0.200 | 0.122  |
| K02A | 2006 | 311 | 13 | 37 | 43.099 | P | 0.200 | -0.036 |
| DBO  | 2006 | 311 | 13 | 37 | 43.649 | P | 0.200 | 0.199  |
| I03A | 2006 | 311 | 13 | 37 | 46.428 | P | 0.200 | 0.096  |

|      |     |    |    |         |           |           |         |     |       |
|------|-----|----|----|---------|-----------|-----------|---------|-----|-------|
| 2006 | 324 | 14 | 38 | 29.2053 | -17.66400 | -70.22800 | 39.1000 | 246 | 0.004 |
|------|-----|----|----|---------|-----------|-----------|---------|-----|-------|

|      |      |     |    |    |        |   |       |        |
|------|------|-----|----|----|--------|---|-------|--------|
| SDD  | 2006 | 324 | 14 | 49 | 25.574 | P | 0.200 | 0.303  |
| SVD  | 2006 | 324 | 14 | 49 | 25.608 | P | 0.200 | 0.288  |
| HEC  | 2006 | 324 | 14 | 49 | 25.655 | P | 0.200 | 0.153  |
| BBR  | 2006 | 324 | 14 | 49 | 25.870 | P | 0.200 | 0.401  |
| V11A | 2006 | 324 | 14 | 49 | 26.267 | P | 0.200 | -0.040 |
| TUQ  | 2006 | 324 | 14 | 49 | 26.426 | P | 0.200 | -0.067 |
| CIA  | 2006 | 324 | 14 | 49 | 27.685 | P | 0.200 | 0.033  |
| VTV  | 2006 | 324 | 14 | 49 | 27.932 | P | 0.200 | -0.293 |
| BFS  | 2006 | 324 | 14 | 49 | 28.027 | P | 0.200 | -0.213 |
| RRX  | 2006 | 324 | 14 | 49 | 28.363 | P | 0.200 | 0.136  |
| FMP  | 2006 | 324 | 14 | 49 | 28.366 | P | 0.200 | -0.124 |
| ADO  | 2006 | 324 | 14 | 49 | 28.541 | P | 0.200 | 0.031  |
| U11A | 2006 | 324 | 14 | 49 | 28.955 | P | 0.200 | 0.216  |
| GSC  | 2006 | 324 | 14 | 49 | 29.416 | P | 0.200 | 0.108  |
| SHO  | 2006 | 324 | 14 | 49 | 29.595 | P | 0.200 | 0.005  |
| MWC  | 2006 | 324 | 14 | 49 | 29.717 | P | 0.200 | 0.029  |
| PASC | 2006 | 324 | 14 | 49 | 29.849 | P | 0.200 | -0.056 |
| CHF  | 2006 | 324 | 14 | 49 | 29.987 | P | 0.200 | 0.021  |
| DJJ  | 2006 | 324 | 14 | 49 | 30.687 | P | 0.200 | -0.034 |
| VCS  | 2006 | 324 | 14 | 49 | 30.753 | P | 0.200 | -0.237 |
| DEC  | 2006 | 324 | 14 | 49 | 30.759 | P | 0.200 | -0.003 |
| SNCC | 2006 | 324 | 14 | 49 | 31.144 | P | 0.200 | -0.267 |

|      |      |     |    |    |        |   |       |        |
|------|------|-----|----|----|--------|---|-------|--------|
| EDW2 | 2006 | 324 | 14 | 49 | 31.641 | P | 0.200 | -0.423 |
| TOV  | 2006 | 324 | 14 | 49 | 32.163 | P | 0.200 | -0.089 |
| LGU  | 2006 | 324 | 14 | 49 | 32.832 | P | 0.200 | -0.198 |
| SLA  | 2006 | 324 | 14 | 49 | 33.294 | P | 0.200 | -0.173 |
| LRL  | 2006 | 324 | 14 | 49 | 33.297 | P | 0.200 | -0.005 |
| OSI  | 2006 | 324 | 14 | 49 | 33.419 | P | 0.200 | -0.371 |
| FUR  | 2006 | 324 | 14 | 49 | 34.429 | P | 0.200 | 0.322  |
| MPM  | 2006 | 324 | 14 | 49 | 34.745 | P | 0.200 | -0.336 |
| ARV  | 2006 | 324 | 14 | 49 | 36.224 | P | 0.200 | 0.163  |
| SBC  | 2006 | 324 | 14 | 49 | 36.624 | P | 0.200 | -0.208 |
| ISA  | 2006 | 324 | 14 | 49 | 37.118 | P | 0.200 | 0.048  |
| GRA  | 2006 | 324 | 14 | 49 | 38.691 | P | 0.200 | 0.415  |
| CWC  | 2006 | 324 | 14 | 49 | 38.983 | P | 0.200 | 0.234  |
| MPP  | 2006 | 324 | 14 | 49 | 39.204 | P | 0.200 | 0.037  |
| VES  | 2006 | 324 | 14 | 49 | 39.922 | P | 0.200 | -0.025 |
| Q11A | 2006 | 324 | 14 | 49 | 40.180 | P | 0.200 | 0.294  |
| R10A | 2006 | 324 | 14 | 49 | 40.619 | P | 0.200 | 0.798  |
| S09A | 2006 | 324 | 14 | 49 | 40.771 | P | 0.200 | 0.034  |
| RCT  | 2006 | 324 | 14 | 49 | 41.498 | P | 0.200 | -0.888 |
| SMM  | 2006 | 324 | 14 | 49 | 41.656 | P | 0.200 | 0.250  |
| TIN  | 2006 | 324 | 14 | 49 | 42.007 | P | 0.200 | 0.374  |
| TPH  | 2006 | 324 | 14 | 49 | 42.303 | P | 0.200 | 0.100  |
| R09A | 2006 | 324 | 14 | 49 | 42.450 | P | 0.200 | 0.047  |
| HELL | 2006 | 324 | 14 | 49 | 42.910 | P | 0.200 | -0.167 |
| V05C | 2006 | 324 | 14 | 49 | 43.447 | P | 0.200 | 0.209  |
| S08C | 2006 | 324 | 14 | 49 | 43.734 | P | 0.200 | 0.231  |
| PHL  | 2006 | 324 | 14 | 49 | 43.913 | P | 0.200 | -0.031 |
| U05C | 2006 | 324 | 14 | 49 | 45.376 | P | 0.200 | -0.354 |
| Q09A | 2006 | 324 | 14 | 49 | 45.419 | P | 0.200 | 0.201  |
| T06C | 2006 | 324 | 14 | 49 | 45.556 | P | 0.200 | -1.232 |
| PKD  | 2006 | 324 | 14 | 49 | 45.703 | P | 0.200 | -0.239 |
| SN43 | 2006 | 324 | 14 | 49 | 47.071 | P | 0.200 | -0.767 |
| RAMR | 2006 | 324 | 14 | 49 | 46.116 | P | 0.200 | 0.044  |
| MLAC | 2006 | 324 | 14 | 49 | 46.491 | P | 0.200 | 0.215  |
| P10A | 2006 | 324 | 14 | 49 | 46.515 | P | 0.200 | 0.568  |
| R08A | 2006 | 324 | 14 | 49 | 46.568 | P | 0.200 | 0.026  |
| Q08A | 2006 | 324 | 14 | 49 | 47.616 | P | 0.200 | -0.194 |
| P09A | 2006 | 324 | 14 | 49 | 47.909 | P | 0.200 | -0.112 |
| U04C | 2006 | 324 | 14 | 49 | 48.397 | P | 0.200 | 0.072  |
| R07C | 2006 | 324 | 14 | 49 | 49.153 | P | 0.200 | 0.369  |
| V03C | 2006 | 324 | 14 | 49 | 49.254 | P | 0.200 | 0.477  |
| T05C | 2006 | 324 | 14 | 49 | 50.216 | P | 0.200 | 0.323  |
| S05C | 2006 | 324 | 14 | 49 | 50.476 | P | 0.200 | 0.139  |
| O09A | 2006 | 324 | 14 | 49 | 50.499 | P | 0.200 | -0.117 |
| S06C | 2006 | 324 | 14 | 49 | 50.802 | P | 0.200 | -0.064 |
| BMN  | 2006 | 324 | 14 | 49 | 51.266 | P | 0.200 | -0.433 |
| HAST | 2006 | 324 | 14 | 49 | 51.363 | P | 0.200 | -0.027 |
| Q07A | 2006 | 324 | 14 | 49 | 51.560 | P | 0.200 | 0.337  |
| P08A | 2006 | 324 | 14 | 49 | 51.869 | P | 0.200 | 0.201  |
| SAO  | 2006 | 324 | 14 | 49 | 52.225 | P | 0.200 | -0.151 |
| R06C | 2006 | 324 | 14 | 49 | 52.526 | P | 0.200 | 0.551  |
| PACP | 2006 | 324 | 14 | 49 | 52.946 | P | 0.200 | 0.251  |
| CMB  | 2006 | 324 | 14 | 49 | 52.962 | P | 0.200 | -0.389 |
| SN97 | 2006 | 324 | 14 | 49 | 54.980 | P | 0.200 | 0.601  |
| O08A | 2006 | 324 | 14 | 49 | 53.998 | P | 0.200 | -0.454 |
| P07A | 2006 | 324 | 14 | 49 | 54.158 | P | 0.200 | 0.375  |
| SN96 | 2006 | 324 | 14 | 49 | 54.175 | P | 0.200 | 0.247  |
| SNA8 | 2006 | 324 | 14 | 49 | 55.181 | P | 0.200 | 0.415  |
| SN93 | 2006 | 324 | 14 | 49 | 54.489 | P | 0.200 | 0.091  |
| SNA4 | 2006 | 324 | 14 | 49 | 55.617 | P | 0.200 | -0.042 |
| S04C | 2006 | 324 | 14 | 49 | 54.754 | P | 0.200 | 0.201  |
| SNA3 | 2006 | 324 | 14 | 49 | 55.881 | P | 0.200 | 0.096  |
| SNA7 | 2006 | 324 | 14 | 49 | 56.007 | P | 0.200 | 0.460  |

|      |      |     |    |    |        |   |       |        |
|------|------|-----|----|----|--------|---|-------|--------|
| R05C | 2006 | 324 | 14 | 49 | 55.316 | P | 0.200 | 0.254  |
| MHC  | 2006 | 324 | 14 | 49 | 55.642 | P | 0.200 | 0.307  |
| O07A | 2006 | 324 | 14 | 49 | 55.806 | P | 0.200 | -0.411 |
| SNB5 | 2006 | 324 | 14 | 49 | 56.963 | P | 0.200 | -0.052 |
| SNB7 | 2006 | 324 | 14 | 49 | 56.978 | P | 0.200 | 0.467  |
| SNB3 | 2006 | 324 | 14 | 49 | 57.406 | P | 0.200 | 0.049  |
| BNLO | 2006 | 324 | 14 | 49 | 56.408 | P | 0.200 | -0.145 |
| R04C | 2006 | 324 | 14 | 49 | 56.416 | P | 0.200 | 0.478  |
| WCN  | 2006 | 324 | 14 | 49 | 56.607 | P | 0.200 | 0.533  |
| SNC4 | 2006 | 324 | 14 | 49 | 57.937 | P | 0.200 | -0.254 |
| LAVA | 2006 | 324 | 14 | 49 | 57.097 | P | 0.200 | -0.178 |
| SNC5 | 2006 | 324 | 14 | 49 | 58.223 | P | 0.200 | -0.176 |
| WENL | 2006 | 324 | 14 | 49 | 57.247 | P | 0.200 | 0.721  |
| SNC7 | 2006 | 324 | 14 | 49 | 58.639 | P | 0.200 | 0.251  |
| JRSC | 2006 | 324 | 14 | 49 | 57.647 | P | 0.200 | 0.141  |
| P06A | 2006 | 324 | 14 | 49 | 58.094 | P | 0.200 | 0.133  |
| SND5 | 2006 | 324 | 14 | 49 | 59.118 | P | 0.200 | -0.375 |
| SND8 | 2006 | 324 | 14 | 49 | 59.202 | P | 0.200 | 0.228  |
| N07B | 2006 | 324 | 14 | 49 | 58.537 | P | 0.200 | -0.410 |
| BDM  | 2006 | 324 | 14 | 49 | 58.813 | P | 0.200 | 0.543  |
| SNC3 | 2006 | 324 | 14 | 49 | 58.907 | P | 0.200 | 0.251  |
| SNE9 | 2006 | 324 | 14 | 49 | 59.953 | P | 0.200 | -0.329 |
| SND7 | 2006 | 324 | 14 | 50 | 0.311  | P | 0.200 | 0.220  |
| P05C | 2006 | 324 | 14 | 49 | 59.355 | P | 0.200 | 0.446  |
| SND4 | 2006 | 324 | 14 | 49 | 59.363 | P | 0.200 | -0.367 |
| BRK  | 2006 | 324 | 14 | 49 | 59.444 | P | 0.200 | 0.187  |
| BRIB | 2006 | 324 | 14 | 49 | 59.465 | P | 0.200 | 0.292  |
| BKS  | 2006 | 324 | 14 | 49 | 59.512 | P | 0.200 | 0.179  |
| SNE6 | 2006 | 324 | 14 | 50 | 0.538  | P | 0.200 | 0.119  |
| SNE4 | 2006 | 324 | 14 | 50 | 0.821  | P | 0.200 | -0.322 |
| SNE5 | 2006 | 324 | 14 | 50 | 0.980  | P | 0.200 | -0.087 |
| Q04C | 2006 | 324 | 14 | 50 | 0.200  | P | 0.200 | 0.453  |
| BEK  | 2006 | 324 | 14 | 50 | 0.333  | P | 0.200 | 0.163  |
| SNF6 | 2006 | 324 | 14 | 50 | 1.895  | P | 0.200 | -0.214 |
| FARB | 2006 | 324 | 14 | 50 | 1.238  | P | 0.200 | -0.237 |
| CVS  | 2006 | 324 | 14 | 50 | 1.518  | P | 0.200 | -0.288 |
| N06A | 2006 | 324 | 14 | 50 | 1.678  | P | 0.200 | 0.046  |
| M07A | 2006 | 324 | 14 | 50 | 1.759  | P | 0.200 | -0.222 |
| Q03C | 2006 | 324 | 14 | 50 | 1.990  | P | 0.200 | 0.713  |
| SUTB | 2006 | 324 | 14 | 50 | 2.273  | P | 0.200 | -0.353 |
| SNG5 | 2006 | 324 | 14 | 50 | 3.480  | P | 0.200 | -0.169 |
| O05C | 2006 | 324 | 14 | 50 | 2.697  | P | 0.200 | 0.334  |
| ORV  | 2006 | 324 | 14 | 50 | 3.081  | P | 0.200 | 0.381  |
| MNRC | 2006 | 324 | 14 | 50 | 3.895  | P | 0.200 | 0.252  |
| O04C | 2006 | 324 | 14 | 50 | 4.155  | P | 0.200 | -0.190 |
| ELFS | 2006 | 324 | 14 | 50 | 4.364  | P | 0.200 | 0.013  |
| O03C | 2006 | 324 | 14 | 50 | 5.131  | P | 0.200 | -1.122 |
| L07A | 2006 | 324 | 14 | 50 | 5.237  | P | 0.200 | 0.274  |
| M06C | 2006 | 324 | 14 | 50 | 5.584  | P | 0.200 | 0.071  |
| HOPS | 2006 | 324 | 14 | 50 | 6.674  | P | 0.200 | 0.438  |
| HATC | 2006 | 324 | 14 | 50 | 7.101  | P | 0.200 | -0.335 |
| GASB | 2006 | 324 | 14 | 50 | 7.995  | P | 0.200 | 0.471  |
| M05C | 2006 | 324 | 14 | 50 | 8.210  | P | 0.200 | -0.124 |
| WDC  | 2006 | 324 | 14 | 50 | 8.368  | P | 0.200 | -1.803 |
| O02C | 2006 | 324 | 14 | 50 | 8.812  | P | 0.200 | -0.758 |
| P01C | 2006 | 324 | 14 | 50 | 9.439  | P | 0.200 | 0.399  |
| L05A | 2006 | 324 | 14 | 50 | 10.295 | P | 0.200 | 0.302  |
| M03C | 2006 | 324 | 14 | 50 | 10.369 | P | 0.200 | -0.929 |
| M04C | 2006 | 324 | 14 | 50 | 11.933 | P | 0.200 | -0.328 |
| K05A | 2006 | 324 | 14 | 50 | 13.102 | P | 0.200 | 0.326  |
| M02C | 2006 | 324 | 14 | 50 | 13.311 | P | 0.200 | -0.866 |
| YBH  | 2006 | 324 | 14 | 50 | 13.447 | P | 0.200 | -1.414 |
| O01C | 2006 | 324 | 14 | 50 | 13.506 | P | 0.200 | 0.482  |

|      |      |     |    |    |        |   |       |        |
|------|------|-----|----|----|--------|---|-------|--------|
| L04A | 2006 | 324 | 14 | 50 | 13.524 | P | 0.200 | -0.318 |
| N02C | 2006 | 324 | 14 | 50 | 13.552 | P | 0.200 | -0.166 |
| K04A | 2006 | 324 | 14 | 50 | 14.649 | P | 0.200 | -0.272 |
| J05A | 2006 | 324 | 14 | 50 | 15.733 | P | 0.200 | -0.096 |
| JCC  | 2006 | 324 | 14 | 50 | 16.171 | P | 0.200 | 0.195  |
| J04A | 2006 | 324 | 14 | 50 | 18.158 | P | 0.200 | -0.174 |
| L02A | 2006 | 324 | 14 | 50 | 19.245 | P | 0.200 | 0.032  |
| I04A | 2006 | 324 | 14 | 50 | 20.473 | P | 0.200 | -0.556 |
| K02A | 2006 | 324 | 14 | 50 | 20.856 | P | 0.200 | -0.186 |
| DBO  | 2006 | 324 | 14 | 50 | 21.401 | P | 0.200 | 0.050  |
| J02A | 2006 | 324 | 14 | 50 | 23.450 | P | 0.200 | 0.318  |

|      |     |    |    |         |           |           |         |     |        |
|------|-----|----|----|---------|-----------|-----------|---------|-----|--------|
| 2006 | 293 | 10 | 48 | 56.5475 | -13.45700 | -76.67700 | 23.0000 | 236 | -0.001 |
|------|-----|----|----|---------|-----------|-----------|---------|-----|--------|

|      |      |     |    |    |        |   |       |        |
|------|------|-----|----|----|--------|---|-------|--------|
| SDD  | 2006 | 293 | 10 | 59 | 7.653  | P | 0.200 | -0.028 |
| SVD  | 2006 | 293 | 10 | 59 | 8.244  | P | 0.200 | 0.309  |
| BBR  | 2006 | 293 | 10 | 59 | 8.564  | P | 0.200 | 0.423  |
| HEC  | 2006 | 293 | 10 | 59 | 8.629  | P | 0.200 | 0.227  |
| V11A | 2006 | 293 | 10 | 59 | 9.652  | P | 0.200 | -0.012 |
| TUQ  | 2006 | 293 | 10 | 59 | 9.790  | P | 0.200 | 0.100  |
| CIA  | 2006 | 293 | 10 | 59 | 9.974  | P | 0.200 | -0.134 |
| BFS  | 2006 | 293 | 10 | 59 | 10.533 | P | 0.200 | -0.487 |
| VTV  | 2006 | 293 | 10 | 59 | 10.960 | P | 0.200 | -0.166 |
| FMP  | 2006 | 293 | 10 | 59 | 11.000 | P | 0.200 | -0.084 |
| RRX  | 2006 | 293 | 10 | 59 | 11.314 | P | 0.200 | 0.073  |
| ADO  | 2006 | 293 | 10 | 59 | 11.481 | P | 0.200 | 0.054  |
| RPV  | 2006 | 293 | 10 | 59 | 11.597 | P | 0.200 | 0.005  |
| PAS  | 2006 | 293 | 10 | 59 | 12.449 | P | 0.200 | -0.053 |
| MWC  | 2006 | 293 | 10 | 59 | 12.485 | P | 0.200 | -0.048 |
| U11A | 2006 | 293 | 10 | 59 | 12.527 | P | 0.200 | 0.117  |
| GSC  | 2006 | 293 | 10 | 59 | 12.729 | P | 0.200 | 0.199  |
| USC  | 2006 | 293 | 10 | 59 | 12.825 | P | 0.200 | 0.401  |
| CHF  | 2006 | 293 | 10 | 59 | 12.910 | P | 0.200 | 0.048  |
| SHO  | 2006 | 293 | 10 | 59 | 13.124 | P | 0.200 | 0.026  |
| DJJ  | 2006 | 293 | 10 | 59 | 13.564 | P | 0.200 | -0.003 |
| DEC  | 2006 | 293 | 10 | 59 | 13.594 | P | 0.200 | -0.073 |
| VCS  | 2006 | 293 | 10 | 59 | 13.724 | P | 0.200 | -0.251 |
| SNCC | 2006 | 293 | 10 | 59 | 13.778 | P | 0.200 | -0.247 |
| EDW2 | 2006 | 293 | 10 | 59 | 14.859 | P | 0.200 | -0.395 |
| TOV  | 2006 | 293 | 10 | 59 | 14.987 | P | 0.200 | -0.214 |
| LGU  | 2006 | 293 | 10 | 59 | 15.778 | P | 0.200 | -0.214 |
| U10A | 2006 | 293 | 10 | 59 | 16.168 | P | 0.200 | 0.243  |
| OSI  | 2006 | 293 | 10 | 59 | 16.622 | P | 0.200 | -0.324 |
| LRL  | 2006 | 293 | 10 | 59 | 16.797 | P | 0.200 | 0.027  |
| SLA  | 2006 | 293 | 10 | 59 | 16.963 | P | 0.200 | -0.141 |
| SCZ2 | 2006 | 293 | 10 | 59 | 17.469 | P | 0.200 | -0.375 |
| FUR  | 2006 | 293 | 10 | 59 | 18.165 | P | 0.200 | 0.147  |
| MPM  | 2006 | 293 | 10 | 59 | 18.739 | P | 0.200 | -0.101 |
| ARV  | 2006 | 293 | 10 | 59 | 19.525 | P | 0.200 | -0.007 |
| SBC  | 2006 | 293 | 10 | 59 | 19.976 | P | 0.200 | -0.123 |
| ISA  | 2006 | 293 | 10 | 59 | 20.901 | P | 0.200 | 0.131  |
| BAK  | 2006 | 293 | 10 | 59 | 21.801 | P | 0.200 | 0.051  |
| MPP  | 2006 | 293 | 10 | 59 | 22.613 | P | 0.200 | -0.088 |
| GRA  | 2006 | 293 | 10 | 59 | 22.851 | P | 0.200 | 0.301  |
| CWC  | 2006 | 293 | 10 | 59 | 22.984 | P | 0.200 | 0.171  |
| VES  | 2006 | 293 | 10 | 59 | 23.609 | P | 0.200 | -0.244 |
| SMM  | 2006 | 293 | 10 | 59 | 25.278 | P | 0.200 | 0.078  |
| R10A | 2006 | 293 | 10 | 59 | 25.344 | P | 0.200 | 0.620  |
| Q11A | 2006 | 293 | 10 | 59 | 25.366 | P | 0.200 | 0.319  |
| S09A | 2006 | 293 | 10 | 59 | 25.531 | P | 0.200 | 0.106  |
| RCT  | 2006 | 293 | 10 | 59 | 25.767 | P | 0.200 | -0.790 |
| TIN  | 2006 | 293 | 10 | 59 | 26.327 | P | 0.200 | 0.253  |
| TPH  | 2006 | 293 | 10 | 59 | 27.064 | P | 0.200 | -0.021 |
| V05C | 2006 | 293 | 10 | 59 | 27.397 | P | 0.200 | 0.104  |

|      |      |     |    |    |        |   |       |        |
|------|------|-----|----|----|--------|---|-------|--------|
| R09A | 2006 | 293 | 10 | 59 | 27.438 | P | 0.200 | 0.077  |
| PHL  | 2006 | 293 | 10 | 59 | 27.644 | P | 0.200 | -0.225 |
| S08C | 2006 | 293 | 10 | 59 | 28.396 | P | 0.200 | 0.219  |
| U05C | 2006 | 293 | 10 | 59 | 29.620 | P | 0.200 | -0.479 |
| PKD  | 2006 | 293 | 10 | 59 | 29.868 | P | 0.200 | -0.297 |
| RAMR | 2006 | 293 | 10 | 59 | 30.183 | P | 0.200 | -0.002 |
| T06C | 2006 | 293 | 10 | 59 | 30.341 | P | 0.200 | -1.099 |
| SN43 | 2006 | 293 | 10 | 59 | 32.242 | P | 0.200 | -0.443 |
| MLAC | 2006 | 293 | 10 | 59 | 31.278 | P | 0.200 | 0.151  |
| R08A | 2006 | 293 | 10 | 59 | 31.755 | P | 0.200 | 0.071  |
| P10A | 2006 | 293 | 10 | 59 | 31.944 | P | 0.200 | 0.295  |
| U04C | 2006 | 293 | 10 | 59 | 32.831 | P | 0.200 | -0.007 |
| V03C | 2006 | 293 | 10 | 59 | 33.298 | P | 0.200 | 0.095  |
| Q08A | 2006 | 293 | 10 | 59 | 33.373 | P | 0.200 | 0.131  |
| P09A | 2006 | 293 | 10 | 59 | 33.671 | P | 0.200 | -0.077 |
| R07C | 2006 | 293 | 10 | 59 | 34.230 | P | 0.200 | 0.286  |
| T05C | 2006 | 293 | 10 | 59 | 34.714 | P | 0.200 | 0.039  |
| S05C | 2006 | 293 | 10 | 59 | 35.056 | P | 0.200 | -0.240 |
| S06C | 2006 | 293 | 10 | 59 | 35.893 | P | 0.200 | -0.130 |
| HAST | 2006 | 293 | 10 | 59 | 35.964 | P | 0.200 | -0.105 |
| O09A | 2006 | 293 | 10 | 59 | 36.679 | P | 0.200 | -0.046 |
| Q07A | 2006 | 293 | 10 | 59 | 37.031 | P | 0.200 | 0.213  |
| SAO  | 2006 | 293 | 10 | 59 | 37.253 | P | 0.200 | 0.033  |
| P08A | 2006 | 293 | 10 | 59 | 37.526 | P | 0.200 | -0.070 |
| BMN  | 2006 | 293 | 10 | 59 | 37.653 | P | 0.200 | -0.310 |
| PACP | 2006 | 293 | 10 | 59 | 37.723 | P | 0.200 | 0.072  |
| R06C | 2006 | 293 | 10 | 59 | 37.909 | P | 0.200 | 0.472  |
| CMB  | 2006 | 293 | 10 | 59 | 38.577 | P | 0.200 | -0.109 |
| SN97 | 2006 | 293 | 10 | 59 | 40.528 | P | 0.200 | 0.480  |
| SN96 | 2006 | 293 | 10 | 59 | 39.726 | P | 0.200 | 0.274  |
| SNA8 | 2006 | 293 | 10 | 59 | 40.908 | P | 0.200 | 0.338  |
| P07A | 2006 | 293 | 10 | 59 | 39.933 | P | 0.200 | 0.192  |
| SN93 | 2006 | 293 | 10 | 59 | 40.007 | P | 0.200 | 0.159  |
| S04C | 2006 | 293 | 10 | 59 | 40.053 | P | 0.200 | 0.271  |
| O08A | 2006 | 293 | 10 | 59 | 40.260 | P | 0.200 | -0.475 |
| SNA4 | 2006 | 293 | 10 | 59 | 41.264 | P | 0.200 | -0.015 |
| SNA3 | 2006 | 293 | 10 | 59 | 41.492 | P | 0.200 | 0.123  |
| SNA7 | 2006 | 293 | 10 | 59 | 41.830 | P | 0.200 | 0.503  |
| MHC  | 2006 | 293 | 10 | 59 | 40.865 | P | 0.200 | 0.334  |
| R05C | 2006 | 293 | 10 | 59 | 40.998 | P | 0.200 | 0.286  |
| BNLO | 2006 | 293 | 10 | 59 | 41.476 | P | 0.200 | -0.264 |
| SNB5 | 2006 | 293 | 10 | 59 | 42.795 | P | 0.200 | -0.026 |
| SNB7 | 2006 | 293 | 10 | 59 | 42.816 | P | 0.200 | 0.435  |
| SNB3 | 2006 | 293 | 10 | 59 | 43.114 | P | 0.200 | 0.028  |
| N08A | 2006 | 293 | 10 | 59 | 42.475 | P | 0.200 | -0.342 |
| WENL | 2006 | 293 | 10 | 59 | 42.491 | P | 0.200 | 0.589  |
| WCN  | 2006 | 293 | 10 | 59 | 42.573 | P | 0.200 | 0.553  |
| JRSC | 2006 | 293 | 10 | 59 | 42.871 | P | 0.200 | 0.006  |
| SNC4 | 2006 | 293 | 10 | 59 | 43.945 | P | 0.200 | -0.137 |
| LAVA | 2006 | 293 | 10 | 59 | 43.018 | P | 0.200 | -0.056 |
| SNC5 | 2006 | 293 | 10 | 59 | 44.246 | P | 0.200 | -0.110 |
| SNC7 | 2006 | 293 | 10 | 59 | 44.661 | P | 0.200 | 0.226  |
| BDM  | 2006 | 293 | 10 | 59 | 44.355 | P | 0.200 | 0.510  |
| SND5 | 2006 | 293 | 10 | 59 | 45.363 | P | 0.200 | -0.208 |
| P06A | 2006 | 293 | 10 | 59 | 44.393 | P | 0.200 | 0.271  |
| SND8 | 2006 | 293 | 10 | 59 | 45.435 | P | 0.200 | 0.247  |
| BRIB | 2006 | 293 | 10 | 59 | 44.944 | P | 0.200 | 0.163  |
| BRK  | 2006 | 293 | 10 | 59 | 44.970 | P | 0.200 | 0.094  |
| BKS  | 2006 | 293 | 10 | 59 | 45.084 | P | 0.200 | 0.154  |
| N07B | 2006 | 293 | 10 | 59 | 45.233 | P | 0.200 | -0.395 |
| SND4 | 2006 | 293 | 10 | 59 | 45.462 | P | 0.200 | -0.307 |
| SND7 | 2006 | 293 | 10 | 59 | 46.735 | P | 0.200 | 0.388  |
| SNE6 | 2006 | 293 | 10 | 59 | 46.775 | P | 0.200 | 0.135  |

|      |      |     |    |    |        |   |       |        |
|------|------|-----|----|----|--------|---|-------|--------|
| Q04C | 2006 | 293 | 10 | 59 | 45.927 | P | 0.200 | 0.220  |
| O06A | 2006 | 293 | 10 | 59 | 46.032 | P | 0.200 | 0.162  |
| SNE5 | 2006 | 293 | 10 | 59 | 47.117 | P | 0.200 | -0.175 |
| SNE4 | 2006 | 293 | 10 | 59 | 47.159 | P | 0.200 | -0.142 |
| BEK  | 2006 | 293 | 10 | 59 | 46.808 | P | 0.200 | 0.271  |
| FARB | 2006 | 293 | 10 | 59 | 46.872 | P | 0.200 | -0.270 |
| SNF6 | 2006 | 293 | 10 | 59 | 48.385 | P | 0.200 | -0.080 |
| CVS  | 2006 | 293 | 10 | 59 | 47.482 | P | 0.200 | -0.220 |
| Q03C | 2006 | 293 | 10 | 59 | 47.922 | P | 0.200 | 0.677  |
| MCCM | 2006 | 293 | 10 | 59 | 48.298 | P | 0.200 | -0.101 |
| N06A | 2006 | 293 | 10 | 59 | 48.422 | P | 0.200 | 0.008  |
| SUTB | 2006 | 293 | 10 | 59 | 48.635 | P | 0.200 | -0.220 |
| M07A | 2006 | 293 | 10 | 59 | 48.731 | P | 0.200 | -0.305 |
| SNG5 | 2006 | 293 | 10 | 59 | 50.014 | P | 0.200 | -0.090 |
| O05C | 2006 | 293 | 10 | 59 | 49.264 | P | 0.200 | 0.397  |
| ORV  | 2006 | 293 | 10 | 59 | 49.370 | P | 0.200 | 0.294  |
| MNRC | 2006 | 293 | 10 | 59 | 50.240 | P | 0.200 | 0.421  |
| O04C | 2006 | 293 | 10 | 59 | 50.996 | P | 0.200 | -0.059 |
| ELFS | 2006 | 293 | 10 | 59 | 51.166 | P | 0.200 | -0.003 |
| O03C | 2006 | 293 | 10 | 59 | 52.054 | P | 0.200 | -0.892 |
| L07A | 2006 | 293 | 10 | 59 | 52.494 | P | 0.200 | 0.109  |
| M06C | 2006 | 293 | 10 | 59 | 52.678 | P | 0.200 | 0.055  |
| HOPS | 2006 | 293 | 10 | 59 | 53.001 | P | 0.200 | 0.415  |
| HATC | 2006 | 293 | 10 | 59 | 54.178 | P | 0.200 | -0.296 |
| GASB | 2006 | 293 | 10 | 59 | 54.606 | P | 0.200 | 0.454  |
| M05C | 2006 | 293 | 10 | 59 | 55.441 | P | 0.200 | -0.199 |
| WDC  | 2006 | 293 | 10 | 59 | 55.797 | P | 0.200 | -1.462 |
| O02C | 2006 | 293 | 10 | 59 | 55.967 | P | 0.200 | -0.538 |
| P01C | 2006 | 293 | 10 | 59 | 56.070 | P | 0.200 | 0.384  |
| L05A | 2006 | 293 | 10 | 59 | 57.817 | P | 0.200 | 0.188  |
| M04C | 2006 | 293 | 10 | 59 | 59.557 | P | 0.200 | -0.348 |
| O01C | 2006 | 293 | 11 | 0  | 0.636  | P | 0.200 | 0.517  |
| N02C | 2006 | 293 | 11 | 0  | 0.849  | P | 0.200 | -0.232 |
| M02C | 2006 | 293 | 11 | 0  | 1.036  | P | 0.200 | -0.750 |
| K05A | 2006 | 293 | 11 | 0  | 1.067  | P | 0.200 | 0.266  |
| L04A | 2006 | 293 | 11 | 0  | 1.374  | P | 0.200 | -0.348 |
| YBH  | 2006 | 293 | 11 | 0  | 1.834  | P | 0.200 | -0.807 |
| K04A | 2006 | 293 | 11 | 0  | 2.720  | P | 0.200 | -0.297 |
| JCC  | 2006 | 293 | 11 | 0  | 3.851  | P | 0.200 | 0.361  |
| J05A | 2006 | 293 | 11 | 0  | 4.313  | P | 0.200 | 0.083  |
| HUMO | 2006 | 293 | 11 | 0  | 6.452  | P | 0.200 | -0.516 |
| L02A | 2006 | 293 | 11 | 0  | 7.266  | P | 0.200 | -0.086 |
| M01C | 2006 | 293 | 11 | 0  | 8.174  | P | 0.200 | 0.239  |
| K02A | 2006 | 293 | 11 | 0  | 9.341  | P | 0.200 | -0.149 |
| DBO  | 2006 | 293 | 11 | 0  | 9.789  | P | 0.200 | -0.165 |
| J03A | 2006 | 293 | 11 | 0  | 9.789  | P | 0.200 | -0.242 |
| J02A | 2006 | 293 | 11 | 0  | 12.227 | P | 0.200 | 0.285  |
| K01A | 2006 | 293 | 11 | 0  | 13.258 | P | 0.200 | 0.418  |
| I03A | 2006 | 293 | 11 | 0  | 13.393 | P | 0.200 | -0.078 |

|      |      |     |    |         |           |           |          |        |       |
|------|------|-----|----|---------|-----------|-----------|----------|--------|-------|
| 2006 | 255  | 13  | 30 | 56.4115 | -28.94400 | -68.89800 | 114.0000 | 216    | 0.004 |
| SVD  | 2006 | 255 | 13 | 42      | 39.977    | P         | 0.200    | 0.401  |       |
| BBR  | 2006 | 255 | 13 | 42      | 40.478    | P         | 0.200    | 0.609  |       |
| HEC  | 2006 | 255 | 13 | 42      | 40.711    | P         | 0.200    | 0.331  |       |
| CIA  | 2006 | 255 | 13 | 42      | 40.976    | P         | 0.200    | 0.160  |       |
| FMP  | 2006 | 255 | 13 | 42      | 41.859    | P         | 0.200    | 0.069  |       |
| TUQ  | 2006 | 255 | 13 | 42      | 41.917    | P         | 0.200    | 0.289  |       |
| BFS  | 2006 | 255 | 13 | 42      | 41.935    | P         | 0.200    | -0.103 |       |
| V11A | 2006 | 255 | 13 | 42      | 41.961    | P         | 0.200    | 0.168  |       |
| VTV  | 2006 | 255 | 13 | 42      | 42.148    | P         | 0.200    | -0.136 |       |
| RRX  | 2006 | 255 | 13 | 42      | 42.884    | P         | 0.200    | 0.330  |       |
| PAS  | 2006 | 255 | 13 | 42      | 43.192    | P         | 0.200    | 0.146  |       |
| MWC  | 2006 | 255 | 13 | 42      | 43.299    | P         | 0.200    | 0.136  |       |

|      |      |     |    |    |        |   |       |        |
|------|------|-----|----|----|--------|---|-------|--------|
| CHF  | 2006 | 255 | 13 | 42 | 43.644 | P | 0.200 | 0.206  |
| SNCC | 2006 | 255 | 13 | 42 | 43.709 | P | 0.200 | 0.060  |
| DJJ  | 2006 | 255 | 13 | 42 | 43.996 | P | 0.200 | 0.116  |
| GSC  | 2006 | 255 | 13 | 42 | 44.016 | P | 0.200 | 0.237  |
| VCS  | 2006 | 255 | 13 | 42 | 44.183 | P | 0.200 | -0.245 |
| DEC  | 2006 | 255 | 13 | 42 | 44.216 | P | 0.200 | 0.228  |
| SHO  | 2006 | 255 | 13 | 42 | 44.469 | P | 0.200 | 0.059  |
| U11A | 2006 | 255 | 13 | 42 | 44.671 | P | 0.200 | 0.446  |
| TOV  | 2006 | 255 | 13 | 42 | 45.174 | P | 0.200 | 0.088  |
| EDW2 | 2006 | 255 | 13 | 42 | 45.210 | P | 0.200 | -0.355 |
| LGU  | 2006 | 255 | 13 | 42 | 45.642 | P | 0.200 | -0.027 |
| OSI  | 2006 | 255 | 13 | 42 | 46.656 | P | 0.200 | -0.055 |
| SCZ2 | 2006 | 255 | 13 | 42 | 47.112 | P | 0.200 | 0.146  |
| LRL  | 2006 | 255 | 13 | 42 | 47.191 | P | 0.200 | 0.168  |
| SLA  | 2006 | 255 | 13 | 42 | 47.428 | P | 0.200 | -0.062 |
| MPM  | 2006 | 255 | 13 | 42 | 48.756 | P | 0.200 | -0.192 |
| FUR  | 2006 | 255 | 13 | 42 | 48.795 | P | 0.200 | 0.391  |
| SBC  | 2006 | 255 | 13 | 42 | 49.108 | P | 0.200 | 0.162  |
| ARV  | 2006 | 255 | 13 | 42 | 49.216 | P | 0.200 | 0.347  |
| ISA  | 2006 | 255 | 13 | 42 | 50.426 | P | 0.200 | 0.253  |
| MPP  | 2006 | 255 | 13 | 42 | 51.559 | P | 0.200 | 0.363  |
| CWC  | 2006 | 255 | 13 | 42 | 52.357 | P | 0.200 | 0.235  |
| GRA  | 2006 | 255 | 13 | 42 | 52.522 | P | 0.200 | 0.370  |
| VES  | 2006 | 255 | 13 | 42 | 52.540 | P | 0.200 | -0.048 |
| SMM  | 2006 | 255 | 13 | 42 | 53.764 | P | 0.200 | 0.456  |
| RCT  | 2006 | 255 | 13 | 42 | 53.873 | P | 0.200 | -1.018 |
| S09A | 2006 | 255 | 13 | 42 | 54.686 | P | 0.200 | 0.033  |
| R10A | 2006 | 255 | 13 | 42 | 54.952 | P | 0.200 | 0.588  |
| Q11A | 2006 | 255 | 13 | 42 | 55.004 | P | 0.200 | 0.175  |
| TIN  | 2006 | 255 | 13 | 42 | 55.170 | P | 0.200 | 0.322  |
| HELL | 2006 | 255 | 13 | 42 | 55.288 | P | 0.200 | -0.407 |
| V05C | 2006 | 255 | 13 | 42 | 55.520 | P | 0.200 | 0.293  |
| PHL  | 2006 | 255 | 13 | 42 | 55.633 | P | 0.200 | 0.202  |
| TPH  | 2006 | 255 | 13 | 42 | 56.128 | P | 0.200 | 0.056  |
| R09A | 2006 | 255 | 13 | 42 | 56.317 | P | 0.200 | -0.059 |
| S08C | 2006 | 255 | 13 | 42 | 56.854 | P | 0.200 | 0.153  |
| U05C | 2006 | 255 | 13 | 42 | 57.265 | P | 0.200 | -0.220 |
| PKD  | 2006 | 255 | 13 | 42 | 57.322 | P | 0.200 | -0.094 |
| RAMR | 2006 | 255 | 13 | 42 | 57.578 | P | 0.200 | 0.289  |
| T06C | 2006 | 255 | 13 | 42 | 57.787 | P | 0.200 | -1.062 |
| SN43 | 2006 | 255 | 13 | 42 | 59.450 | P | 0.200 | -0.615 |
| Q09A | 2006 | 255 | 13 | 42 | 59.027 | P | 0.200 | 0.013  |
| MLAC | 2006 | 255 | 13 | 42 | 59.196 | P | 0.200 | 0.232  |
| R08A | 2006 | 255 | 13 | 42 | 59.652 | P | 0.200 | -0.102 |
| U04C | 2006 | 255 | 13 | 42 | 59.969 | P | 0.200 | 0.394  |
| V03C | 2006 | 255 | 13 | 43 | 0.326  | P | 0.200 | 0.649  |
| P10A | 2006 | 255 | 13 | 43 | 0.475  | P | 0.200 | 0.305  |
| SN55 | 2006 | 255 | 13 | 43 | 1.508  | P | 0.200 | -0.019 |
| Q08A | 2006 | 255 | 13 | 43 | 0.720  | P | 0.200 | -0.346 |
| P09A | 2006 | 255 | 13 | 43 | 1.344  | P | 0.200 | -0.446 |
| R07C | 2006 | 255 | 13 | 43 | 1.560  | P | 0.200 | 0.263  |
| T05C | 2006 | 255 | 13 | 43 | 1.808  | P | 0.200 | 0.575  |
| S05C | 2006 | 255 | 13 | 43 | 2.114  | P | 0.200 | 0.187  |
| HAST | 2006 | 255 | 13 | 43 | 2.236  | P | 0.200 | 0.183  |
| S06C | 2006 | 255 | 13 | 43 | 2.673  | P | 0.200 | -0.119 |
| SAO  | 2006 | 255 | 13 | 43 | 3.124  | P | 0.200 | 0.014  |
| O09A | 2006 | 255 | 13 | 43 | 3.898  | P | 0.200 | -0.322 |
| PACP | 2006 | 255 | 13 | 43 | 3.963  | P | 0.200 | 0.406  |
| Q07A | 2006 | 255 | 13 | 43 | 4.110  | P | 0.200 | 0.295  |
| CMB  | 2006 | 255 | 13 | 43 | 4.416  | P | 0.200 | -0.461 |
| R06C | 2006 | 255 | 13 | 43 | 4.643  | P | 0.200 | 0.496  |
| P08A | 2006 | 255 | 13 | 43 | 4.854  | P | 0.200 | 0.137  |
| S04C | 2006 | 255 | 13 | 43 | 5.623  | P | 0.200 | 0.265  |



|      |      |     |    |    |        |   |       |        |
|------|------|-----|----|----|--------|---|-------|--------|
| SN97 | 2006 | 255 | 13 | 43 | 6.657  | P | 0.200 | 0.406  |
| SN93 | 2006 | 255 | 13 | 43 | 5.722  | P | 0.200 | 0.020  |
| SN96 | 2006 | 255 | 13 | 43 | 5.756  | P | 0.200 | 0.102  |
| SNA4 | 2006 | 255 | 13 | 43 | 6.778  | P | 0.200 | -0.269 |
| SNA8 | 2006 | 255 | 13 | 43 | 6.930  | P | 0.200 | 0.159  |
| SNA3 | 2006 | 255 | 13 | 43 | 6.970  | P | 0.200 | -0.073 |
| BMN  | 2006 | 255 | 13 | 43 | 6.100  | P | 0.200 | 0.861  |
| MHC  | 2006 | 255 | 13 | 43 | 6.277  | P | 0.200 | 0.362  |
| SNA7 | 2006 | 255 | 13 | 43 | 7.550  | P | 0.200 | 0.177  |
| P07A | 2006 | 255 | 13 | 43 | 6.628  | P | 0.200 | 0.374  |
| BNLO | 2006 | 255 | 13 | 43 | 6.691  | P | 0.200 | -0.055 |
| O08A | 2006 | 255 | 13 | 43 | 6.792  | P | 0.200 | -0.552 |
| R05C | 2006 | 255 | 13 | 43 | 6.853  | P | 0.200 | 0.091  |
| SNB5 | 2006 | 255 | 13 | 43 | 8.091  | P | 0.200 | -0.279 |
| SNB3 | 2006 | 255 | 13 | 43 | 8.272  | P | 0.200 | -0.104 |
| SNB7 | 2006 | 255 | 13 | 43 | 8.375  | P | 0.200 | 0.266  |
| R04C | 2006 | 255 | 13 | 43 | 7.393  | P | 0.200 | 0.402  |
| WENL | 2006 | 255 | 13 | 43 | 7.535  | P | 0.200 | 0.545  |
| JRSC | 2006 | 255 | 13 | 43 | 7.774  | P | 0.200 | 0.161  |
| SNC4 | 2006 | 255 | 13 | 43 | 8.813  | P | 0.200 | -0.389 |
| SNC5 | 2006 | 255 | 13 | 43 | 8.981  | P | 0.200 | -0.583 |
| SNC6 | 2006 | 255 | 13 | 43 | 9.016  | P | 0.200 | 0.031  |
| LAVA | 2006 | 255 | 13 | 43 | 8.036  | P | 0.200 | -0.427 |
| N08A | 2006 | 255 | 13 | 43 | 8.062  | P | 0.200 | -1.040 |
| WCN  | 2006 | 255 | 13 | 43 | 8.122  | P | 0.200 | 0.172  |
| SNC3 | 2006 | 255 | 13 | 43 | 9.161  | P | 0.200 | -0.379 |
| O07A | 2006 | 255 | 13 | 43 | 8.253  | P | 0.200 | -0.373 |
| SNC7 | 2006 | 255 | 13 | 43 | 9.890  | P | 0.200 | 0.072  |
| SND5 | 2006 | 255 | 13 | 43 | 9.981  | P | 0.200 | -0.514 |
| BDM  | 2006 | 255 | 13 | 43 | 9.257  | P | 0.200 | 0.594  |
| SND8 | 2006 | 255 | 13 | 43 | 10.539 | P | 0.200 | 0.047  |
| BRK  | 2006 | 255 | 13 | 43 | 9.641  | P | 0.200 | 0.285  |
| BRIB | 2006 | 255 | 13 | 43 | 9.644  | P | 0.200 | 0.263  |
| BKS  | 2006 | 255 | 13 | 43 | 9.678  | P | 0.200 | 0.232  |
| P06A | 2006 | 255 | 13 | 43 | 9.765  | P | 0.200 | 0.044  |
| SND4 | 2006 | 255 | 13 | 43 | 9.962  | P | 0.200 | -0.625 |
| P05C | 2006 | 255 | 13 | 43 | 10.245 | P | 0.200 | 0.103  |
| SNE6 | 2006 | 255 | 13 | 43 | 11.289 | P | 0.200 | -0.193 |
| SND7 | 2006 | 255 | 13 | 43 | 11.344 | P | 0.200 | 0.017  |
| SNE4 | 2006 | 255 | 13 | 43 | 11.374 | P | 0.200 | -0.511 |
| SNE5 | 2006 | 255 | 13 | 43 | 11.706 | P | 0.200 | -0.194 |
| Q04C | 2006 | 255 | 13 | 43 | 10.760 | P | 0.200 | 0.298  |
| FARB | 2006 | 255 | 13 | 43 | 10.878 | P | 0.200 | -0.129 |
| N07B | 2006 | 255 | 13 | 43 | 10.977 | P | 0.200 | -0.226 |
| O06A | 2006 | 255 | 13 | 43 | 11.334 | P | 0.200 | 0.193  |
| SNE7 | 2006 | 255 | 13 | 43 | 12.424 | P | 0.200 | -0.041 |
| SNF6 | 2006 | 255 | 13 | 43 | 12.497 | P | 0.200 | -0.471 |
| CVS  | 2006 | 255 | 13 | 43 | 11.549 | P | 0.200 | -0.191 |
| BEK  | 2006 | 255 | 13 | 43 | 11.549 | P | 0.200 | 0.004  |
| SNE9 | 2006 | 255 | 13 | 43 | 11.675 | P | 0.200 | -0.094 |
| MCCM | 2006 | 255 | 13 | 43 | 12.125 | P | 0.200 | 0.017  |
| Q03C | 2006 | 255 | 13 | 43 | 12.189 | P | 0.200 | 0.646  |
| SUTB | 2006 | 255 | 13 | 43 | 12.503 | P | 0.200 | -0.510 |
| SNF9 | 2006 | 255 | 13 | 43 | 12.657 | P | 0.200 | -0.219 |
| SNG5 | 2006 | 255 | 13 | 43 | 13.811 | P | 0.200 | -0.387 |
| N06A | 2006 | 255 | 13 | 43 | 13.211 | P | 0.200 | -0.060 |
| O05C | 2006 | 255 | 13 | 43 | 13.248 | P | 0.200 | -0.063 |
| ORV  | 2006 | 255 | 13 | 43 | 13.496 | P | 0.200 | 0.228  |
| MNRC | 2006 | 255 | 13 | 43 | 13.812 | P | 0.200 | 0.255  |
| M07A | 2006 | 255 | 13 | 43 | 13.914 | P | 0.200 | -0.086 |
| O04C | 2006 | 255 | 13 | 43 | 14.746 | P | 0.200 | -0.373 |
| O03C | 2006 | 255 | 13 | 43 | 15.221 | P | 0.200 | -1.176 |
| ELFS | 2006 | 255 | 13 | 43 | 15.229 | P | 0.200 | -0.148 |

|      |      |     |    |    |        |   |       |        |
|------|------|-----|----|----|--------|---|-------|--------|
| HOPS | 2006 | 255 | 13 | 43 | 16.267 | P | 0.200 | 0.600  |
| M06C | 2006 | 255 | 13 | 43 | 16.601 | P | 0.200 | -0.025 |
| L07A | 2006 | 255 | 13 | 43 | 17.070 | P | 0.200 | 0.312  |
| HATC | 2006 | 255 | 13 | 43 | 17.471 | P | 0.200 | -0.449 |
| GASB | 2006 | 255 | 13 | 43 | 17.663 | P | 0.200 | 0.481  |
| WDC  | 2006 | 255 | 13 | 43 | 18.291 | P | 0.200 | -1.611 |
| O02C | 2006 | 255 | 13 | 43 | 18.641 | P | 0.200 | -0.512 |
| P01C | 2006 | 255 | 13 | 43 | 18.663 | P | 0.200 | 0.391  |
| M03C | 2006 | 255 | 13 | 43 | 20.422 | P | 0.200 | -0.836 |
| L05A | 2006 | 255 | 13 | 43 | 20.896 | P | 0.200 | 0.134  |
| M04C | 2006 | 255 | 13 | 43 | 21.976 | P | 0.200 | -0.413 |
| O01C | 2006 | 255 | 13 | 43 | 22.395 | P | 0.200 | 0.526  |
| N02C | 2006 | 255 | 13 | 43 | 22.763 | P | 0.200 | -0.145 |
| M02C | 2006 | 255 | 13 | 43 | 23.040 | P | 0.200 | -0.574 |
| YBH  | 2006 | 255 | 13 | 43 | 23.092 | P | 0.200 | -1.273 |
| L04A | 2006 | 255 | 13 | 43 | 23.333 | P | 0.200 | -0.527 |
| K05A | 2006 | 255 | 13 | 43 | 23.462 | P | 0.200 | 0.043  |
| K04A | 2006 | 255 | 13 | 43 | 24.659 | P | 0.200 | -0.344 |
| JCC  | 2006 | 255 | 13 | 43 | 24.869 | P | 0.200 | 0.227  |
| J05A | 2006 | 255 | 13 | 43 | 26.024 | P | 0.200 | -0.130 |
| L02A | 2006 | 255 | 13 | 43 | 28.072 | P | 0.200 | 0.019  |
| DBO  | 2006 | 255 | 13 | 43 | 30.491 | P | 0.200 | 0.185  |
| J02A | 2006 | 255 | 13 | 43 | 31.971 | P | 0.200 | 0.144  |
| K01A | 2006 | 255 | 13 | 43 | 32.408 | P | 0.200 | 0.076  |
| I03A | 2006 | 255 | 13 | 43 | 33.206 | P | 0.200 | 0.032  |

|      |     |   |    |         |           |           |          |     |        |
|------|-----|---|----|---------|-----------|-----------|----------|-----|--------|
| 2006 | 265 | 2 | 32 | 26.6271 | -26.86800 | -63.14900 | 598.3000 | 219 | -0.006 |
|------|-----|---|----|---------|-----------|-----------|----------|-----|--------|

|      |      |     |   |    |        |   |       |        |
|------|------|-----|---|----|--------|---|-------|--------|
| SDD  | 2006 | 265 | 2 | 43 | 31.575 | P | 0.200 | 0.360  |
| SVD  | 2006 | 265 | 2 | 43 | 31.634 | P | 0.200 | 0.282  |
| HEC  | 2006 | 265 | 2 | 43 | 31.968 | P | 0.200 | 0.319  |
| BBR  | 2006 | 265 | 2 | 43 | 32.027 | P | 0.200 | 0.487  |
| V11A | 2006 | 265 | 2 | 43 | 32.585 | P | 0.200 | 0.199  |
| TUQ  | 2006 | 265 | 2 | 43 | 32.731 | P | 0.200 | 0.233  |
| CIA  | 2006 | 265 | 2 | 43 | 33.125 | P | 0.200 | -0.025 |
| VTV  | 2006 | 265 | 2 | 43 | 33.573 | P | 0.200 | -0.248 |
| BFS  | 2006 | 265 | 2 | 43 | 33.579 | P | 0.200 | -0.218 |
| FMP  | 2006 | 265 | 2 | 43 | 33.768 | P | 0.200 | -0.158 |
| RRX  | 2006 | 265 | 2 | 43 | 34.094 | P | 0.200 | 0.218  |
| ADO  | 2006 | 265 | 2 | 43 | 34.116 | P | 0.200 | 0.078  |
| RPV  | 2006 | 265 | 2 | 43 | 34.280 | P | 0.200 | 0.030  |
| PAS  | 2006 | 265 | 2 | 43 | 34.841 | P | 0.200 | -0.074 |
| U11A | 2006 | 265 | 2 | 43 | 34.914 | P | 0.200 | 0.422  |
| MWC  | 2006 | 265 | 2 | 43 | 34.944 | P | 0.200 | -0.027 |
| GSC  | 2006 | 265 | 2 | 43 | 35.013 | P | 0.200 | 0.157  |
| SHO  | 2006 | 265 | 2 | 43 | 35.018 | P | 0.200 | -0.050 |
| CHF  | 2006 | 265 | 2 | 43 | 35.173 | P | 0.200 | -0.015 |
| USC  | 2006 | 265 | 2 | 43 | 35.359 | P | 0.200 | 0.455  |
| VCS  | 2006 | 265 | 2 | 43 | 35.685 | P | 0.200 | -0.414 |
| DJJ  | 2006 | 265 | 2 | 43 | 35.797 | P | 0.200 | 0.002  |
| DEC  | 2006 | 265 | 2 | 43 | 35.821 | P | 0.200 | 0.002  |
| SNCC | 2006 | 265 | 2 | 43 | 35.948 | P | 0.200 | -0.207 |
| EDW2 | 2006 | 265 | 2 | 43 | 36.576 | P | 0.200 | -0.416 |
| TOV  | 2006 | 265 | 2 | 43 | 36.882 | P | 0.200 | -0.128 |
| LGU  | 2006 | 265 | 2 | 43 | 37.350 | P | 0.200 | -0.304 |
| U10A | 2006 | 265 | 2 | 43 | 37.732 | P | 0.200 | 0.439  |
| OSI  | 2006 | 265 | 2 | 43 | 38.044 | P | 0.200 | -0.339 |
| LRL  | 2006 | 265 | 2 | 43 | 38.137 | P | 0.200 | 0.046  |
| SLA  | 2006 | 265 | 2 | 43 | 38.150 | P | 0.200 | -0.128 |
| SCZ2 | 2006 | 265 | 2 | 43 | 38.933 | P | 0.200 | -0.125 |
| FUR  | 2006 | 265 | 2 | 43 | 39.249 | P | 0.200 | 0.429  |
| MPM  | 2006 | 265 | 2 | 43 | 39.507 | P | 0.200 | -0.155 |
| ARV  | 2006 | 265 | 2 | 43 | 40.575 | P | 0.200 | 0.330  |
| SBC  | 2006 | 265 | 2 | 43 | 40.783 | P | 0.200 | -0.011 |

|      |      |     |   |    |        |   |       |        |
|------|------|-----|---|----|--------|---|-------|--------|
| ISA  | 2006 | 265 | 2 | 43 | 41.400 | P | 0.200 | 0.193  |
| GRA  | 2006 | 265 | 2 | 43 | 42.690 | P | 0.200 | 0.355  |
| CWC  | 2006 | 265 | 2 | 43 | 42.958 | P | 0.200 | 0.264  |
| MPP  | 2006 | 265 | 2 | 43 | 43.039 | P | 0.200 | 0.252  |
| VES  | 2006 | 265 | 2 | 43 | 43.322 | P | 0.200 | -0.260 |
| Q11A | 2006 | 265 | 2 | 43 | 44.061 | P | 0.200 | 0.271  |
| R10A | 2006 | 265 | 2 | 43 | 44.390 | P | 0.200 | 0.682  |
| RCT  | 2006 | 265 | 2 | 43 | 44.510 | P | 0.200 | -1.139 |
| S09A | 2006 | 265 | 2 | 43 | 44.538 | P | 0.200 | 0.119  |
| SMM  | 2006 | 265 | 2 | 43 | 45.019 | P | 0.200 | 0.347  |
| TIN  | 2006 | 265 | 2 | 43 | 45.397 | P | 0.200 | 0.315  |
| R09A | 2006 | 265 | 2 | 43 | 45.772 | P | 0.200 | -0.066 |
| HELL | 2006 | 265 | 2 | 43 | 45.798 | P | 0.200 | -0.407 |
| V05C | 2006 | 265 | 2 | 43 | 46.358 | P | 0.200 | 0.080  |
| PHL  | 2006 | 265 | 2 | 43 | 46.828 | P | 0.200 | 0.030  |
| S08C | 2006 | 265 | 2 | 43 | 46.831 | P | 0.200 | 0.133  |
| U05C | 2006 | 265 | 2 | 43 | 47.961 | P | 0.200 | -0.328 |
| PKD  | 2006 | 265 | 2 | 43 | 48.217 | P | 0.200 | -0.262 |
| T06C | 2006 | 265 | 2 | 43 | 48.229 | P | 0.200 | -1.022 |
| Q09A | 2006 | 265 | 2 | 43 | 48.274 | P | 0.200 | 0.101  |
| SN43 | 2006 | 265 | 2 | 43 | 49.600 | P | 0.200 | -0.621 |
| RAMR | 2006 | 265 | 2 | 43 | 48.670 | P | 0.200 | 0.111  |
| P10A | 2006 | 265 | 2 | 43 | 49.118 | P | 0.200 | 0.304  |
| R08A | 2006 | 265 | 2 | 43 | 49.211 | P | 0.200 | -0.064 |
| MLAC | 2006 | 265 | 2 | 43 | 49.217 | P | 0.200 | 0.264  |
| Q08A | 2006 | 265 | 2 | 43 | 49.985 | P | 0.200 | -0.294 |
| P09A | 2006 | 265 | 2 | 43 | 50.153 | P | 0.200 | -0.397 |
| SN55 | 2006 | 265 | 2 | 43 | 51.441 | P | 0.200 | 0.010  |
| U04C | 2006 | 265 | 2 | 43 | 50.703 | P | 0.200 | 0.288  |
| V03C | 2006 | 265 | 2 | 43 | 51.231 | P | 0.200 | 0.493  |
| R07C | 2006 | 265 | 2 | 43 | 51.403 | P | 0.200 | 0.355  |
| T05C | 2006 | 265 | 2 | 43 | 52.292 | P | 0.200 | 0.522  |
| S05C | 2006 | 265 | 2 | 43 | 52.324 | P | 0.200 | 0.133  |
| O09A | 2006 | 265 | 2 | 43 | 52.439 | P | 0.200 | -0.227 |
| S06C | 2006 | 265 | 2 | 43 | 52.652 | P | 0.200 | -0.090 |
| BMN  | 2006 | 265 | 2 | 43 | 52.658 | P | 0.200 | -0.894 |
| HAST | 2006 | 265 | 2 | 43 | 52.862 | P | 0.200 | -0.074 |
| Q07A | 2006 | 265 | 2 | 43 | 53.475 | P | 0.200 | 0.391  |
| SAO  | 2006 | 265 | 2 | 43 | 53.638 | P | 0.200 | -0.150 |
| R06C | 2006 | 265 | 2 | 43 | 54.292 | P | 0.200 | 0.595  |
| PACP | 2006 | 265 | 2 | 43 | 54.333 | P | 0.200 | 0.257  |
| CMB  | 2006 | 265 | 2 | 43 | 54.411 | P | 0.200 | -0.362 |
| SN97 | 2006 | 265 | 2 | 43 | 56.137 | P | 0.200 | 0.450  |
| O08A | 2006 | 265 | 2 | 43 | 55.279 | P | 0.200 | -0.557 |
| SNA8 | 2006 | 265 | 2 | 43 | 56.339 | P | 0.200 | 0.303  |
| SNA4 | 2006 | 265 | 2 | 43 | 56.485 | P | 0.200 | -0.222 |
| SN96 | 2006 | 265 | 2 | 43 | 55.535 | P | 0.200 | 0.247  |
| SN93 | 2006 | 265 | 2 | 43 | 55.622 | P | 0.200 | 0.058  |
| P07A | 2006 | 265 | 2 | 43 | 55.634 | P | 0.200 | 0.417  |
| S04C | 2006 | 265 | 2 | 43 | 55.727 | P | 0.200 | 0.105  |
| SNA3 | 2006 | 265 | 2 | 43 | 56.755 | P | 0.200 | -0.025 |
| SNA7 | 2006 | 265 | 2 | 43 | 56.982 | P | 0.200 | 0.254  |
| R05C | 2006 | 265 | 2 | 43 | 56.363 | P | 0.200 | 0.087  |
| N08A | 2006 | 265 | 2 | 43 | 56.490 | P | 0.200 | -0.837 |
| MHC  | 2006 | 265 | 2 | 43 | 56.492 | P | 0.200 | 0.203  |
| SNB5 | 2006 | 265 | 2 | 43 | 57.720 | P | 0.200 | -0.130 |
| SNB7 | 2006 | 265 | 2 | 43 | 57.807 | P | 0.200 | 0.364  |
| SNB3 | 2006 | 265 | 2 | 43 | 57.931 | P | 0.200 | -0.113 |
| BNLO | 2006 | 265 | 2 | 43 | 57.006 | P | 0.200 | -0.257 |
| O07A | 2006 | 265 | 2 | 43 | 57.081 | P | 0.200 | -0.172 |
| R04C | 2006 | 265 | 2 | 43 | 57.213 | P | 0.200 | 0.396  |
| SNC4 | 2006 | 265 | 2 | 43 | 58.413 | P | 0.200 | -0.307 |
| WCN  | 2006 | 265 | 2 | 43 | 57.486 | P | 0.200 | 0.372  |

|      |      |     |   |    |        |   |       |        |
|------|------|-----|---|----|--------|---|-------|--------|
| SNC5 | 2006 | 265 | 2 | 43 | 58.520 | P | 0.200 | -0.435 |
| SNC6 | 2006 | 265 | 2 | 43 | 58.552 | P | 0.200 | 0.218  |
| WENL | 2006 | 265 | 2 | 43 | 57.656 | P | 0.200 | 0.434  |
| LAVA | 2006 | 265 | 2 | 43 | 57.673 | P | 0.200 | -0.331 |
| JRSC | 2006 | 265 | 2 | 43 | 58.044 | P | 0.200 | 0.051  |
| SNC7 | 2006 | 265 | 2 | 43 | 59.198 | P | 0.200 | 0.166  |
| SND5 | 2006 | 265 | 2 | 43 | 59.389 | P | 0.200 | -0.439 |
| SND8 | 2006 | 265 | 2 | 43 | 59.703 | P | 0.200 | 0.189  |
| P06A | 2006 | 265 | 2 | 43 | 58.839 | P | 0.200 | 0.125  |
| SNC3 | 2006 | 265 | 2 | 43 | 58.956 | P | 0.200 | -0.185 |
| BDM  | 2006 | 265 | 2 | 43 | 59.203 | P | 0.200 | 0.488  |
| N07B | 2006 | 265 | 2 | 43 | 59.283 | P | 0.200 | -0.242 |
| SND7 | 2006 | 265 | 2 | 44 | 0.493  | P | 0.200 | 0.093  |
| SND4 | 2006 | 265 | 2 | 43 | 59.521 | P | 0.200 | -0.490 |
| SNE6 | 2006 | 265 | 2 | 44 | 0.585  | P | 0.200 | -0.061 |
| BRK  | 2006 | 265 | 2 | 43 | 59.601 | P | 0.200 | 0.123  |
| BRIB | 2006 | 265 | 2 | 43 | 59.623 | P | 0.200 | 0.153  |
| BKS  | 2006 | 265 | 2 | 43 | 59.636 | P | 0.200 | 0.056  |
| P05C | 2006 | 265 | 2 | 43 | 59.675 | P | 0.200 | 0.283  |
| SNE4 | 2006 | 265 | 2 | 44 | 0.831  | P | 0.200 | -0.389 |
| SNE5 | 2006 | 265 | 2 | 44 | 1.022  | P | 0.200 | -0.109 |
| O06A | 2006 | 265 | 2 | 44 | 0.038  | P | 0.200 | 0.184  |
| Q04C | 2006 | 265 | 2 | 44 | 0.390  | P | 0.200 | 0.381  |
| SNE7 | 2006 | 265 | 2 | 44 | 1.483  | P | 0.200 | 0.040  |
| SNE9 | 2006 | 265 | 2 | 44 | 0.529  | P | 0.200 | -0.069 |
| BEK  | 2006 | 265 | 2 | 44 | 0.552  | P | 0.200 | 0.089  |
| SNF6 | 2006 | 265 | 2 | 44 | 1.595  | P | 0.200 | -0.449 |
| FARB | 2006 | 265 | 2 | 44 | 0.914  | P | 0.200 | -0.344 |
| CVS  | 2006 | 265 | 2 | 44 | 1.403  | P | 0.200 | -0.205 |
| SNF9 | 2006 | 265 | 2 | 44 | 1.540  | P | 0.200 | -0.086 |
| N06A | 2006 | 265 | 2 | 44 | 1.647  | P | 0.200 | -0.025 |
| SNG5 | 2006 | 265 | 2 | 44 | 2.814  | P | 0.200 | -0.444 |
| Q03C | 2006 | 265 | 2 | 44 | 1.913  | P | 0.200 | 0.684  |
| SUTB | 2006 | 265 | 2 | 44 | 1.987  | P | 0.200 | -0.382 |
| M07A | 2006 | 265 | 2 | 44 | 2.006  | P | 0.200 | 0.007  |
| MCCM | 2006 | 265 | 2 | 44 | 2.007  | P | 0.200 | -0.089 |
| O05C | 2006 | 265 | 2 | 44 | 2.233  | P | 0.200 | 0.037  |
| ORV  | 2006 | 265 | 2 | 44 | 2.687  | P | 0.200 | 0.271  |
| MNRC | 2006 | 265 | 2 | 44 | 3.371  | P | 0.200 | 0.245  |
| O04C | 2006 | 265 | 2 | 44 | 3.548  | P | 0.200 | -0.292 |
| ELFS | 2006 | 265 | 2 | 44 | 3.846  | P | 0.200 | -0.062 |
| O03C | 2006 | 265 | 2 | 44 | 4.304  | P | 0.200 | -1.030 |
| L07A | 2006 | 265 | 2 | 44 | 4.941  | P | 0.200 | 0.500  |
| M06C | 2006 | 265 | 2 | 44 | 4.990  | P | 0.200 | 0.164  |
| HOPS | 2006 | 265 | 2 | 44 | 5.694  | P | 0.200 | 0.487  |
| HATC | 2006 | 265 | 2 | 44 | 6.085  | P | 0.200 | -0.307 |
| GASB | 2006 | 265 | 2 | 44 | 6.919  | P | 0.200 | 0.571  |
| M05C | 2006 | 265 | 2 | 44 | 6.997  | P | 0.200 | -0.122 |
| WDC  | 2006 | 265 | 2 | 44 | 7.055  | P | 0.200 | -1.510 |
| O02C | 2006 | 265 | 2 | 44 | 7.679  | P | 0.200 | -0.348 |
| P01C | 2006 | 265 | 2 | 44 | 8.003  | P | 0.200 | 0.443  |
| M03C | 2006 | 265 | 2 | 44 | 8.853  | P | 0.200 | -0.669 |
| L05A | 2006 | 265 | 2 | 44 | 8.880  | P | 0.200 | 0.338  |
| M04C | 2006 | 265 | 2 | 44 | 10.179 | P | 0.200 | -0.193 |
| K05A | 2006 | 265 | 2 | 44 | 11.065 | P | 0.200 | 0.207  |
| YBH  | 2006 | 265 | 2 | 44 | 11.348 | P | 0.200 | -1.100 |
| L04A | 2006 | 265 | 2 | 44 | 11.399 | P | 0.200 | -0.260 |
| O01C | 2006 | 265 | 2 | 44 | 11.473 | P | 0.200 | 0.642  |
| M02C | 2006 | 265 | 2 | 44 | 11.473 | P | 0.200 | -0.407 |
| N02C | 2006 | 265 | 2 | 44 | 11.563 | P | 0.200 | 0.064  |
| K04A | 2006 | 265 | 2 | 44 | 12.399 | P | 0.200 | -0.180 |
| J05A | 2006 | 265 | 2 | 44 | 13.248 | P | 0.200 | -0.110 |
| JCC  | 2006 | 265 | 2 | 44 | 13.681 | P | 0.200 | 0.406  |

|      |      |     |   |    |        |   |       |        |
|------|------|-----|---|----|--------|---|-------|--------|
| L02A | 2006 | 265 | 2 | 44 | 16.228 | P | 0.200 | 0.206  |
| M01C | 2006 | 265 | 2 | 44 | 16.774 | P | 0.200 | 0.234  |
| DBO  | 2006 | 265 | 2 | 44 | 18.003 | P | 0.200 | 0.186  |
| J02A | 2006 | 265 | 2 | 44 | 19.436 | P | 0.200 | 0.151  |
| I03A | 2006 | 265 | 2 | 44 | 20.191 | P | 0.200 | -0.161 |
| K01A | 2006 | 265 | 2 | 44 | 20.376 | P | 0.200 | 0.235  |
| TAKO | 2006 | 265 | 2 | 44 | 21.853 | P | 0.200 | 0.080  |

|      |     |   |    |         |           |           |          |     |        |
|------|-----|---|----|---------|-----------|-----------|----------|-----|--------|
| 2006 | 317 | 1 | 26 | 35.8614 | -26.04100 | -63.22100 | 551.8000 | 241 | -0.001 |
|------|-----|---|----|---------|-----------|-----------|----------|-----|--------|

|      |      |     |   |    |        |   |       |        |
|------|------|-----|---|----|--------|---|-------|--------|
| SDD  | 2006 | 317 | 1 | 37 | 41.483 | P | 0.200 | 0.383  |
| SVD  | 2006 | 317 | 1 | 37 | 41.609 | P | 0.200 | 0.403  |
| HEC  | 2006 | 317 | 1 | 37 | 41.849 | P | 0.200 | 0.390  |
| BBR  | 2006 | 317 | 1 | 37 | 41.941 | P | 0.200 | 0.559  |
| V11A | 2006 | 317 | 1 | 37 | 42.419 | P | 0.200 | 0.275  |
| TUQ  | 2006 | 317 | 1 | 37 | 42.592 | P | 0.200 | 0.305  |
| BFS  | 2006 | 317 | 1 | 37 | 42.893 | P | 0.200 | -0.795 |
| CIA  | 2006 | 317 | 1 | 37 | 43.084 | P | 0.200 | -0.007 |
| FMP  | 2006 | 317 | 1 | 37 | 43.721 | P | 0.200 | -0.139 |
| RRX  | 2006 | 317 | 1 | 37 | 43.970 | P | 0.200 | 0.236  |
| ADO  | 2006 | 317 | 1 | 37 | 44.068 | P | 0.200 | 0.148  |
| RPV  | 2006 | 317 | 1 | 37 | 44.191 | P | 0.200 | -0.001 |
| U11A | 2006 | 317 | 1 | 37 | 44.705 | P | 0.200 | 0.446  |
| GSC  | 2006 | 317 | 1 | 37 | 44.882 | P | 0.200 | 0.179  |
| MWC  | 2006 | 317 | 1 | 37 | 44.885 | P | 0.200 | -0.006 |
| SHO  | 2006 | 317 | 1 | 37 | 44.959 | P | 0.200 | 0.072  |
| PASC | 2006 | 317 | 1 | 37 | 44.965 | P | 0.200 | -0.092 |
| CHF  | 2006 | 317 | 1 | 37 | 45.163 | P | 0.200 | 0.054  |
| USC  | 2006 | 317 | 1 | 37 | 45.314 | P | 0.200 | 0.474  |
| DJJ  | 2006 | 317 | 1 | 37 | 45.715 | P | 0.200 | -0.026 |
| DEC  | 2006 | 317 | 1 | 37 | 45.732 | P | 0.200 | -0.022 |
| VCS  | 2006 | 317 | 1 | 37 | 45.734 | P | 0.200 | -0.290 |
| EDW2 | 2006 | 317 | 1 | 37 | 46.569 | P | 0.200 | -0.337 |
| LGU  | 2006 | 317 | 1 | 37 | 47.409 | P | 0.200 | -0.230 |
| U10A | 2006 | 317 | 1 | 37 | 47.635 | P | 0.200 | 0.519  |
| OSI  | 2006 | 317 | 1 | 37 | 48.035 | P | 0.200 | -0.314 |
| SLA  | 2006 | 317 | 1 | 37 | 48.109 | P | 0.200 | -0.051 |
| LRL  | 2006 | 317 | 1 | 37 | 48.117 | P | 0.200 | 0.125  |
| SCZ2 | 2006 | 317 | 1 | 37 | 48.881 | P | 0.200 | -0.202 |
| FUR  | 2006 | 317 | 1 | 37 | 49.138 | P | 0.200 | 0.460  |
| MPM  | 2006 | 317 | 1 | 37 | 49.432 | P | 0.200 | -0.129 |
| ARV  | 2006 | 317 | 1 | 37 | 50.579 | P | 0.200 | 0.351  |
| SBC  | 2006 | 317 | 1 | 37 | 50.741 | P | 0.200 | -0.088 |
| ISA  | 2006 | 317 | 1 | 37 | 51.436 | P | 0.200 | 0.273  |
| GRA  | 2006 | 317 | 1 | 37 | 52.671 | P | 0.200 | 0.434  |
| CWC  | 2006 | 317 | 1 | 37 | 52.878 | P | 0.200 | 0.239  |
| MPP  | 2006 | 317 | 1 | 37 | 53.058 | P | 0.200 | 0.223  |
| VES  | 2006 | 317 | 1 | 37 | 53.302 | P | 0.200 | -0.284 |
| Q11A | 2006 | 317 | 1 | 37 | 53.965 | P | 0.200 | 0.347  |
| R10A | 2006 | 317 | 1 | 37 | 54.274 | P | 0.200 | 0.705  |
| S09A | 2006 | 317 | 1 | 37 | 54.472 | P | 0.200 | 0.141  |
| RCT  | 2006 | 317 | 1 | 37 | 54.507 | P | 0.200 | -1.164 |
| SMM  | 2006 | 317 | 1 | 37 | 55.055 | P | 0.200 | 0.321  |
| TIN  | 2006 | 317 | 1 | 37 | 55.386 | P | 0.200 | 0.334  |
| R09A | 2006 | 317 | 1 | 37 | 55.706 | P | 0.200 | -0.042 |
| TPH  | 2006 | 317 | 1 | 37 | 55.729 | P | 0.200 | 0.157  |
| HELL | 2006 | 317 | 1 | 37 | 55.784 | P | 0.200 | -0.443 |
| V05C | 2006 | 317 | 1 | 37 | 56.443 | P | 0.200 | 0.095  |
| S08C | 2006 | 317 | 1 | 37 | 56.873 | P | 0.200 | 0.199  |
| PHL  | 2006 | 317 | 1 | 37 | 56.951 | P | 0.200 | 0.047  |
| U05C | 2006 | 317 | 1 | 37 | 58.065 | P | 0.200 | -0.308 |
| T06C | 2006 | 317 | 1 | 37 | 58.212 | P | 0.200 | -1.102 |
| Q09A | 2006 | 317 | 1 | 37 | 58.274 | P | 0.200 | 0.173  |
| PKD  | 2006 | 317 | 1 | 37 | 58.294 | P | 0.200 | -0.291 |

|      |      |     |   |    |        |   |       |        |
|------|------|-----|---|----|--------|---|-------|--------|
| SN43 | 2006 | 317 | 1 | 37 | 59.723 | P | 0.200 | -0.546 |
| RAMR | 2006 | 317 | 1 | 37 | 58.816 | P | 0.200 | 0.132  |
| P10A | 2006 | 317 | 1 | 37 | 59.088 | P | 0.200 | 0.376  |
| R08A | 2006 | 317 | 1 | 37 | 59.160 | P | 0.200 | -0.090 |
| MLAC | 2006 | 317 | 1 | 37 | 59.252 | P | 0.200 | 0.288  |
| Q08A | 2006 | 317 | 1 | 37 | 59.980 | P | 0.200 | -0.273 |
| P09A | 2006 | 317 | 1 | 38 | 0.112  | P | 0.200 | -0.372 |
| U04C | 2006 | 317 | 1 | 38 | 0.848  | P | 0.200 | 0.304  |
| V03C | 2006 | 317 | 1 | 38 | 1.303  | P | 0.200 | 0.411  |
| R07C | 2006 | 317 | 1 | 38 | 1.456  | P | 0.200 | 0.375  |
| T05C | 2006 | 317 | 1 | 38 | 2.384  | P | 0.200 | 0.488  |
| S05C | 2006 | 317 | 1 | 38 | 2.398  | P | 0.200 | 0.102  |
| O09A | 2006 | 317 | 1 | 38 | 2.409  | P | 0.200 | -0.209 |
| S06C | 2006 | 317 | 1 | 38 | 2.701  | P | 0.200 | -0.122 |
| HAST | 2006 | 317 | 1 | 38 | 3.105  | P | 0.200 | -0.002 |
| BMN  | 2006 | 317 | 1 | 38 | 3.183  | P | 0.200 | -0.324 |
| Q07A | 2006 | 317 | 1 | 38 | 3.523  | P | 0.200 | 0.411  |
| P08A | 2006 | 317 | 1 | 38 | 3.609  | P | 0.200 | 0.099  |
| SAO  | 2006 | 317 | 1 | 38 | 3.826  | P | 0.200 | -0.127 |
| R06C | 2006 | 317 | 1 | 38 | 4.324  | P | 0.200 | 0.571  |
| PACP | 2006 | 317 | 1 | 38 | 4.513  | P | 0.200 | 0.282  |
| CMB  | 2006 | 317 | 1 | 38 | 4.594  | P | 0.200 | -0.284 |
| SN97 | 2006 | 317 | 1 | 38 | 6.243  | P | 0.200 | 0.484  |
| O08A | 2006 | 317 | 1 | 38 | 5.306  | P | 0.200 | -0.526 |
| SNA8 | 2006 | 317 | 1 | 38 | 6.436  | P | 0.200 | 0.337  |
| SN96 | 2006 | 317 | 1 | 38 | 5.601  | P | 0.200 | 0.225  |
| SNA4 | 2006 | 317 | 1 | 38 | 6.633  | P | 0.200 | -0.190 |
| P07A | 2006 | 317 | 1 | 38 | 5.644  | P | 0.200 | 0.397  |
| SN93 | 2006 | 317 | 1 | 38 | 5.769  | P | 0.200 | 0.087  |
| SNA3 | 2006 | 317 | 1 | 38 | 6.862  | P | 0.200 | -0.046 |
| S04C | 2006 | 317 | 1 | 38 | 5.964  | P | 0.200 | 0.185  |
| SNA7 | 2006 | 317 | 1 | 38 | 7.146  | P | 0.200 | 0.336  |
| R05C | 2006 | 317 | 1 | 38 | 6.485  | P | 0.200 | 0.120  |
| N08A | 2006 | 317 | 1 | 38 | 6.677  | P | 0.200 | -0.657 |
| MHC  | 2006 | 317 | 1 | 38 | 6.697  | P | 0.200 | 0.232  |
| SNB5 | 2006 | 317 | 1 | 38 | 7.825  | P | 0.200 | -0.153 |
| SNB7 | 2006 | 317 | 1 | 38 | 7.889  | P | 0.200 | 0.343  |
| O07A | 2006 | 317 | 1 | 38 | 7.101  | P | 0.200 | -0.192 |
| SNB3 | 2006 | 317 | 1 | 38 | 8.112  | P | 0.200 | -0.087 |
| BNLO | 2006 | 317 | 1 | 38 | 7.244  | P | 0.200 | -0.232 |
| R04C | 2006 | 317 | 1 | 38 | 7.284  | P | 0.200 | 0.323  |
| SNC4 | 2006 | 317 | 1 | 38 | 8.549  | P | 0.200 | -0.328 |
| WCN  | 2006 | 317 | 1 | 38 | 7.647  | P | 0.200 | 0.452  |
| SNC5 | 2006 | 317 | 1 | 38 | 8.796  | P | 0.200 | -0.302 |
| LAVA | 2006 | 317 | 1 | 38 | 7.840  | P | 0.200 | -0.303 |
| WENL | 2006 | 317 | 1 | 38 | 7.923  | P | 0.200 | 0.507  |
| JRSC | 2006 | 317 | 1 | 38 | 8.191  | P | 0.200 | -0.027 |
| SNC7 | 2006 | 317 | 1 | 38 | 9.304  | P | 0.200 | 0.144  |
| SND5 | 2006 | 317 | 1 | 38 | 9.636  | P | 0.200 | -0.349 |
| SND8 | 2006 | 317 | 1 | 38 | 9.807  | P | 0.200 | 0.173  |
| P06A | 2006 | 317 | 1 | 38 | 8.869  | P | 0.200 | 0.054  |
| N07B | 2006 | 317 | 1 | 38 | 9.332  | P | 0.200 | -0.252 |
| BDM  | 2006 | 317 | 1 | 38 | 9.385  | P | 0.200 | 0.467  |
| SND7 | 2006 | 317 | 1 | 38 | 10.678 | P | 0.200 | 0.142  |
| SND4 | 2006 | 317 | 1 | 38 | 9.682  | P | 0.200 | -0.499 |
| SNE6 | 2006 | 317 | 1 | 38 | 10.736 | P | 0.200 | -0.067 |
| BRK  | 2006 | 317 | 1 | 38 | 9.764  | P | 0.200 | 0.061  |
| BRIB | 2006 | 317 | 1 | 38 | 9.778  | P | 0.200 | 0.089  |
| BKS  | 2006 | 317 | 1 | 38 | 9.846  | P | 0.200 | 0.043  |
| P05C | 2006 | 317 | 1 | 38 | 9.898  | P | 0.200 | 0.366  |
| O06A | 2006 | 317 | 1 | 38 | 10.081 | P | 0.200 | 0.124  |
| SNE5 | 2006 | 317 | 1 | 38 | 11.097 | P | 0.200 | -0.216 |
| SNE4 | 2006 | 317 | 1 | 38 | 11.116 | P | 0.200 | -0.289 |

|      |      |     |   |    |        |   |       |        |
|------|------|-----|---|----|--------|---|-------|--------|
| Q04C | 2006 | 317 | 1 | 38 | 10.462 | P | 0.200 | 0.277  |
| BEK  | 2006 | 317 | 1 | 38 | 10.677 | P | 0.200 | 0.081  |
| SNF6 | 2006 | 317 | 1 | 38 | 11.825 | P | 0.200 | -0.402 |
| FARB | 2006 | 317 | 1 | 38 | 11.136 | P | 0.200 | -0.399 |
| CVS  | 2006 | 317 | 1 | 38 | 11.600 | P | 0.200 | -0.269 |
| SNF9 | 2006 | 317 | 1 | 38 | 11.682 | P | 0.200 | -0.089 |
| N06A | 2006 | 317 | 1 | 38 | 11.766 | P | 0.200 | -0.035 |
| SNG5 | 2006 | 317 | 1 | 38 | 13.026 | P | 0.200 | -0.466 |
| Q03C | 2006 | 317 | 1 | 38 | 12.082 | P | 0.200 | 0.633  |
| M07A | 2006 | 317 | 1 | 38 | 12.097 | P | 0.200 | 0.001  |
| SUTB | 2006 | 317 | 1 | 38 | 12.157 | P | 0.200 | -0.444 |
| MCCM | 2006 | 317 | 1 | 38 | 12.233 | P | 0.200 | -0.161 |
| O05C | 2006 | 317 | 1 | 38 | 12.408 | P | 0.200 | 0.026  |
| ORV  | 2006 | 317 | 1 | 38 | 12.843 | P | 0.200 | 0.203  |
| MNRC | 2006 | 317 | 1 | 38 | 13.629 | P | 0.200 | 0.224  |
| O04C | 2006 | 317 | 1 | 38 | 13.741 | P | 0.200 | -0.314 |
| ELFS | 2006 | 317 | 1 | 38 | 13.973 | P | 0.200 | -0.129 |
| O03C | 2006 | 317 | 1 | 38 | 14.544 | P | 0.200 | -1.047 |
| L07A | 2006 | 317 | 1 | 38 | 15.007 | P | 0.200 | 0.430  |
| M06C | 2006 | 317 | 1 | 38 | 15.106 | P | 0.200 | 0.092  |
| HOPS | 2006 | 317 | 1 | 38 | 15.936 | P | 0.200 | 0.416  |
| HATC | 2006 | 317 | 1 | 38 | 16.246 | P | 0.200 | -0.381 |
| GASB | 2006 | 317 | 1 | 38 | 17.141 | P | 0.200 | 0.497  |
| M05C | 2006 | 317 | 1 | 38 | 17.142 | P | 0.200 | -0.204 |
| WDC  | 2006 | 317 | 1 | 38 | 17.261 | P | 0.200 | -1.604 |
| O02C | 2006 | 317 | 1 | 38 | 17.899 | P | 0.200 | -0.440 |
| P01C | 2006 | 317 | 1 | 38 | 18.303 | P | 0.200 | 0.412  |
| L05A | 2006 | 317 | 1 | 38 | 19.008 | P | 0.200 | 0.243  |
| M03C | 2006 | 317 | 1 | 38 | 19.036 | P | 0.200 | -0.772 |
| M04C | 2006 | 317 | 1 | 38 | 20.346 | P | 0.200 | -0.292 |
| K05A | 2006 | 317 | 1 | 38 | 21.339 | P | 0.200 | 0.259  |
| YBH  | 2006 | 317 | 1 | 38 | 21.546 | P | 0.200 | -1.182 |
| L04A | 2006 | 317 | 1 | 38 | 21.563 | P | 0.200 | -0.345 |
| M02C | 2006 | 317 | 1 | 38 | 21.681 | P | 0.200 | -0.489 |
| O01C | 2006 | 317 | 1 | 38 | 21.783 | P | 0.200 | 0.599  |
| N02C | 2006 | 317 | 1 | 38 | 21.794 | P | 0.200 | -0.023 |
| K04A | 2006 | 317 | 1 | 38 | 22.653 | P | 0.200 | -0.162 |
| J05A | 2006 | 317 | 1 | 38 | 23.578 | P | 0.200 | 0.009  |
| JCC  | 2006 | 317 | 1 | 38 | 23.988 | P | 0.200 | 0.376  |
| HUMO | 2006 | 317 | 1 | 38 | 25.437 | P | 0.200 | -0.466 |
| J04A | 2006 | 317 | 1 | 38 | 25.524 | P | 0.200 | -0.088 |
| L02A | 2006 | 317 | 1 | 38 | 26.549 | P | 0.200 | 0.213  |
| M01C | 2006 | 317 | 1 | 38 | 27.167 | P | 0.200 | 0.287  |
| I04A | 2006 | 317 | 1 | 38 | 27.301 | P | 0.200 | -0.516 |
| J03A | 2006 | 317 | 1 | 38 | 27.851 | P | 0.200 | -0.269 |
| K02A | 2006 | 317 | 1 | 38 | 27.924 | P | 0.200 | 0.062  |
| DBO  | 2006 | 317 | 1 | 38 | 28.347 | P | 0.200 | 0.237  |
| J02A | 2006 | 317 | 1 | 38 | 29.836 | P | 0.200 | 0.273  |
| I03A | 2006 | 317 | 1 | 38 | 30.572 | P | 0.200 | -0.035 |

|      |      |    |    |         |           |           |         |        |       |
|------|------|----|----|---------|-----------|-----------|---------|--------|-------|
| 2007 | 61   | 13 | 7  | 32.8155 | -30.88200 | -71.19300 | 48.3000 | 312    | 0.003 |
| SDD  | 2007 | 61 | 13 | 19      | 24.582    | P         | 0.200   | 0.385  |       |
| SVD  | 2007 | 61 | 13 | 19      | 25.216    | P         | 0.200   | 0.295  |       |
| BBR  | 2007 | 61 | 13 | 19      | 25.826    | P         | 0.200   | 0.562  |       |
| CIA  | 2007 | 61 | 13 | 19      | 25.964    | P         | 0.200   | 0.162  |       |
| HEC  | 2007 | 61 | 13 | 19      | 26.208    | P         | 0.200   | 0.234  |       |
| FMP  | 2007 | 61 | 13 | 19      | 26.824    | P         | 0.200   | -0.021 |       |
| BFS  | 2007 | 61 | 13 | 19      | 27.152    | P         | 0.200   | -0.129 |       |
| VTV  | 2007 | 61 | 13 | 19      | 27.477    | P         | 0.200   | -0.169 |       |
| TUQ  | 2007 | 61 | 13 | 19      | 27.488    | P         | 0.200   | 0.091  |       |
| V11A | 2007 | 61 | 13 | 19      | 27.733    | P         | 0.200   | 0.028  |       |
| ADO  | 2007 | 61 | 13 | 19      | 27.983    | P         | 0.200   | 0.152  |       |
| RRX  | 2007 | 61 | 13 | 19      | 28.275    | P         | 0.200   | 0.239  |       |

|      |      |    |    |    |        |   |       |        |
|------|------|----|----|----|--------|---|-------|--------|
| PASC | 2007 | 61 | 13 | 19 | 28.444 | P | 0.200 | 0.039  |
| MWC  | 2007 | 61 | 13 | 19 | 28.446 | P | 0.200 | 0.098  |
| CHF  | 2007 | 61 | 13 | 19 | 28.766 | P | 0.200 | 0.119  |
| DJJ  | 2007 | 61 | 13 | 19 | 29.155 | P | 0.200 | 0.178  |
| DEC  | 2007 | 61 | 13 | 19 | 29.272 | P | 0.200 | 0.143  |
| VCS  | 2007 | 61 | 13 | 19 | 29.415 | P | 0.200 | -0.248 |
| GSC  | 2007 | 61 | 13 | 19 | 29.462 | P | 0.200 | 0.091  |
| SHO  | 2007 | 61 | 13 | 19 | 30.156 | P | 0.200 | -0.049 |
| U11A | 2007 | 61 | 13 | 19 | 30.446 | P | 0.200 | 0.205  |
| EDW2 | 2007 | 61 | 13 | 19 | 30.483 | P | 0.200 | -0.397 |
| LGU  | 2007 | 61 | 13 | 19 | 30.650 | P | 0.200 | -0.025 |
| OSI  | 2007 | 61 | 13 | 19 | 31.711 | P | 0.200 | -0.157 |
| SCZ2 | 2007 | 61 | 13 | 19 | 31.807 | P | 0.200 | -0.053 |
| LRL  | 2007 | 61 | 13 | 19 | 32.519 | P | 0.200 | 0.020  |
| SLA  | 2007 | 61 | 13 | 19 | 33.093 | P | 0.200 | -0.015 |
| T11A | 2007 | 61 | 13 | 19 | 33.649 | P | 0.200 | 0.271  |
| SBC  | 2007 | 61 | 13 | 19 | 33.871 | P | 0.200 | -0.038 |
| MPM  | 2007 | 61 | 13 | 19 | 34.414 | P | 0.200 | -0.143 |
| ARV  | 2007 | 61 | 13 | 19 | 34.494 | P | 0.200 | 0.395  |
| FUR  | 2007 | 61 | 13 | 19 | 34.525 | P | 0.200 | 0.340  |
| TPNV | 2007 | 61 | 13 | 19 | 35.218 | P | 0.200 | 0.492  |
| ISA  | 2007 | 61 | 13 | 19 | 35.755 | P | 0.200 | 0.208  |
| MPP  | 2007 | 61 | 13 | 19 | 36.537 | P | 0.200 | 0.310  |
| CWC  | 2007 | 61 | 13 | 19 | 37.882 | P | 0.200 | 0.180  |
| GRA  | 2007 | 61 | 13 | 19 | 38.305 | P | 0.200 | 0.369  |
| SMM  | 2007 | 61 | 13 | 19 | 38.789 | P | 0.200 | 0.407  |
| RCT  | 2007 | 61 | 13 | 19 | 39.188 | P | 0.200 | -1.071 |
| R11A | 2007 | 61 | 13 | 19 | 39.332 | P | 0.200 | 0.255  |
| S10A | 2007 | 61 | 13 | 19 | 39.788 | P | 0.200 | -0.012 |
| PHL  | 2007 | 61 | 13 | 19 | 40.588 | P | 0.200 | 0.154  |
| S09A | 2007 | 61 | 13 | 19 | 40.658 | P | 0.200 | 0.077  |
| HELL | 2007 | 61 | 13 | 19 | 40.702 | P | 0.200 | -0.464 |
| V05C | 2007 | 61 | 13 | 19 | 40.756 | P | 0.200 | 0.346  |
| TIN  | 2007 | 61 | 13 | 19 | 40.823 | P | 0.200 | 0.317  |
| R10A | 2007 | 61 | 13 | 19 | 41.062 | P | 0.200 | 0.534  |
| Q11A | 2007 | 61 | 13 | 19 | 41.305 | P | 0.200 | 0.123  |
| SN12 | 2007 | 61 | 13 | 19 | 41.743 | P | 0.200 | -0.445 |
| TPH  | 2007 | 61 | 13 | 19 | 42.106 | P | 0.200 | 0.048  |
| R09A | 2007 | 61 | 13 | 19 | 42.346 | P | 0.200 | -0.064 |
| PKD  | 2007 | 61 | 13 | 19 | 42.472 | P | 0.200 | -0.053 |
| V04C | 2007 | 61 | 13 | 19 | 42.474 | P | 0.200 | 0.182  |
| SN14 | 2007 | 61 | 13 | 19 | 42.492 | P | 0.200 | -0.282 |
| U05C | 2007 | 61 | 13 | 19 | 42.549 | P | 0.200 | -0.172 |
| S08C | 2007 | 61 | 13 | 19 | 42.589 | P | 0.200 | 0.150  |
| T06C | 2007 | 61 | 13 | 19 | 43.198 | P | 0.200 | -1.073 |
| Q10A | 2007 | 61 | 13 | 19 | 43.302 | P | 0.200 | 0.272  |
| SN34 | 2007 | 61 | 13 | 19 | 43.938 | P | 0.200 | -0.385 |
| SN43 | 2007 | 61 | 13 | 19 | 44.914 | P | 0.200 | -0.662 |
| Q09A | 2007 | 61 | 13 | 19 | 45.079 | P | 0.200 | -0.045 |
| U04C | 2007 | 61 | 13 | 19 | 45.156 | P | 0.200 | 0.450  |
| V03C | 2007 | 61 | 13 | 19 | 45.385 | P | 0.200 | 0.712  |
| R08A | 2007 | 61 | 13 | 19 | 45.533 | P | 0.200 | -0.108 |
| Q08A | 2007 | 61 | 13 | 19 | 46.708 | P | 0.200 | -0.350 |
| P10A | 2007 | 61 | 13 | 19 | 46.809 | P | 0.200 | 0.294  |
| T05C | 2007 | 61 | 13 | 19 | 47.104 | P | 0.200 | 0.619  |
| SN55 | 2007 | 61 | 13 | 19 | 47.123 | P | 0.200 | -0.013 |
| HAST | 2007 | 61 | 13 | 19 | 47.212 | P | 0.200 | 0.135  |
| R07C | 2007 | 61 | 13 | 19 | 47.303 | P | 0.200 | 0.307  |
| S05C | 2007 | 61 | 13 | 19 | 47.488 | P | 0.200 | 0.179  |
| P09A | 2007 | 61 | 13 | 19 | 47.561 | P | 0.200 | -0.457 |
| SN64 | 2007 | 61 | 13 | 19 | 47.954 | P | 0.200 | 0.121  |
| S06C | 2007 | 61 | 13 | 19 | 48.209 | P | 0.200 | -0.126 |
| SN65 | 2007 | 61 | 13 | 19 | 48.284 | P | 0.200 | 0.137  |



|      |      |    |    |    |        |   |       |        |
|------|------|----|----|----|--------|---|-------|--------|
| SAO  | 2007 | 61 | 13 | 19 | 48.431 | P | 0.200 | 0.211  |
| SN74 | 2007 | 61 | 13 | 19 | 48.790 | P | 0.200 | -0.206 |
| SN75 | 2007 | 61 | 13 | 19 | 49.071 | P | 0.200 | -0.013 |
| PACP | 2007 | 61 | 13 | 19 | 49.086 | P | 0.200 | 0.352  |
| CMB  | 2007 | 61 | 13 | 19 | 49.897 | P | 0.200 | -0.468 |
| Q07A | 2007 | 61 | 13 | 19 | 49.974 | P | 0.200 | 0.291  |
| SN84 | 2007 | 61 | 13 | 19 | 49.984 | P | 0.200 | -0.246 |
| O09A | 2007 | 61 | 13 | 19 | 50.049 | P | 0.200 | -0.486 |
| SN85 | 2007 | 61 | 13 | 19 | 50.186 | P | 0.200 | -0.110 |
| R06C | 2007 | 61 | 13 | 19 | 50.343 | P | 0.200 | 0.493  |
| P08A | 2007 | 61 | 13 | 19 | 50.847 | P | 0.200 | 0.026  |
| S04C | 2007 | 61 | 13 | 19 | 50.875 | P | 0.200 | 0.250  |
| SN95 | 2007 | 61 | 13 | 19 | 50.959 | P | 0.200 | -0.370 |
| SN93 | 2007 | 61 | 13 | 19 | 51.190 | P | 0.200 | 0.016  |
| SN96 | 2007 | 61 | 13 | 19 | 51.310 | P | 0.200 | 0.046  |
| MHC  | 2007 | 61 | 13 | 19 | 51.505 | P | 0.200 | 0.408  |
| SN98 | 2007 | 61 | 13 | 19 | 51.567 | P | 0.200 | 0.176  |
| BNLO | 2007 | 61 | 13 | 19 | 51.806 | P | 0.200 | -0.014 |
| SN97 | 2007 | 61 | 13 | 19 | 52.300 | P | 0.200 | 0.353  |
| SNA4 | 2007 | 61 | 13 | 19 | 52.313 | P | 0.200 | -0.284 |
| R05C | 2007 | 61 | 13 | 19 | 52.438 | P | 0.200 | 0.036  |
| SNA3 | 2007 | 61 | 13 | 19 | 52.460 | P | 0.200 | -0.085 |
| SNA5 | 2007 | 61 | 13 | 19 | 52.557 | P | 0.200 | 0.000  |
| P07A | 2007 | 61 | 13 | 19 | 52.623 | P | 0.200 | 0.411  |
| SNA8 | 2007 | 61 | 13 | 19 | 52.749 | P | 0.200 | 0.203  |
| R04C | 2007 | 61 | 13 | 19 | 52.779 | P | 0.200 | 0.345  |
| WENL | 2007 | 61 | 13 | 19 | 52.844 | P | 0.200 | 0.640  |
| JRSC | 2007 | 61 | 13 | 19 | 52.976 | P | 0.200 | 0.259  |
| O08A | 2007 | 61 | 13 | 19 | 53.012 | P | 0.200 | -0.508 |
| SNA7 | 2007 | 61 | 13 | 19 | 53.311 | P | 0.200 | 0.211  |
| SNB6 | 2007 | 61 | 13 | 19 | 53.390 | P | 0.200 | -0.068 |
| LAVA | 2007 | 61 | 13 | 19 | 53.632 | P | 0.200 | -0.381 |
| SNB5 | 2007 | 61 | 13 | 19 | 53.678 | P | 0.200 | -0.293 |
| SNB3 | 2007 | 61 | 13 | 19 | 53.750 | P | 0.200 | -0.112 |
| SNB9 | 2007 | 61 | 13 | 19 | 53.754 | P | 0.200 | 0.123  |
| WCN  | 2007 | 61 | 13 | 19 | 54.051 | P | 0.200 | 0.315  |
| SNB7 | 2007 | 61 | 13 | 19 | 54.055 | P | 0.200 | 0.259  |
| SNC4 | 2007 | 61 | 13 | 19 | 54.343 | P | 0.200 | -0.399 |
| O07A | 2007 | 61 | 13 | 19 | 54.495 | P | 0.200 | -0.186 |
| BDM  | 2007 | 61 | 13 | 19 | 54.507 | P | 0.200 | 0.590  |
| N08A | 2007 | 61 | 13 | 19 | 54.557 | P | 0.200 | -0.796 |
| SNC6 | 2007 | 61 | 13 | 19 | 54.656 | P | 0.200 | 0.023  |
| SNC5 | 2007 | 61 | 13 | 19 | 54.669 | P | 0.200 | -0.481 |
| BRK  | 2007 | 61 | 13 | 19 | 54.770 | P | 0.200 | 0.236  |
| BRIB | 2007 | 61 | 13 | 19 | 54.796 | P | 0.200 | 0.200  |
| BKS  | 2007 | 61 | 13 | 19 | 54.862 | P | 0.200 | 0.238  |
| SNC3 | 2007 | 61 | 13 | 19 | 54.982 | P | 0.200 | -0.038 |
| SNC8 | 2007 | 61 | 13 | 19 | 55.446 | P | 0.200 | 0.244  |
| SNC7 | 2007 | 61 | 13 | 19 | 55.527 | P | 0.200 | 0.007  |
| SND5 | 2007 | 61 | 13 | 19 | 55.570 | P | 0.200 | -0.517 |
| P06A | 2007 | 61 | 13 | 19 | 55.581 | P | 0.200 | 0.027  |
| SND4 | 2007 | 61 | 13 | 19 | 55.591 | P | 0.200 | -0.533 |
| FARB | 2007 | 61 | 13 | 19 | 55.822 | P | 0.200 | -0.232 |
| P05C | 2007 | 61 | 13 | 19 | 55.899 | P | 0.200 | 0.100  |
| Q04C | 2007 | 61 | 13 | 19 | 56.177 | P | 0.200 | 0.245  |
| SND8 | 2007 | 61 | 13 | 19 | 56.303 | P | 0.200 | 0.034  |
| SND9 | 2007 | 61 | 13 | 19 | 56.534 | P | 0.200 | 0.195  |
| CVS  | 2007 | 61 | 13 | 19 | 56.730 | P | 0.200 | -0.246 |
| SNE6 | 2007 | 61 | 13 | 19 | 56.935 | P | 0.200 | -0.198 |
| SNE4 | 2007 | 61 | 13 | 19 | 56.960 | P | 0.200 | -0.469 |
| SND7 | 2007 | 61 | 13 | 19 | 57.054 | P | 0.200 | 0.018  |
| N07B | 2007 | 61 | 13 | 19 | 57.098 | P | 0.200 | -0.228 |
| O06A | 2007 | 61 | 13 | 19 | 57.186 | P | 0.200 | 0.133  |

|      |      |    |    |    |        |   |       |        |
|------|------|----|----|----|--------|---|-------|--------|
| SNE5 | 2007 | 61 | 13 | 19 | 57.242 | P | 0.200 | -0.256 |
| MCCM | 2007 | 61 | 13 | 19 | 57.263 | P | 0.200 | 0.016  |
| BEK  | 2007 | 61 | 13 | 19 | 57.327 | P | 0.200 | -0.008 |
| SNE9 | 2007 | 61 | 13 | 19 | 57.552 | P | 0.200 | -0.051 |
| Q03C | 2007 | 61 | 13 | 19 | 57.581 | P | 0.200 | 0.693  |
| SUTB | 2007 | 61 | 13 | 19 | 57.975 | P | 0.200 | -0.511 |
| SNF6 | 2007 | 61 | 13 | 19 | 58.141 | P | 0.200 | -0.467 |
| SNF9 | 2007 | 61 | 13 | 19 | 58.479 | P | 0.200 | -0.227 |
| SNF8 | 2007 | 61 | 13 | 19 | 58.647 | P | 0.200 | -0.110 |
| ORV  | 2007 | 61 | 13 | 19 | 59.061 | P | 0.200 | 0.222  |
| O05C | 2007 | 61 | 13 | 19 | 59.061 | P | 0.200 | 0.032  |
| MNRC | 2007 | 61 | 13 | 19 | 59.134 | P | 0.200 | 0.250  |
| N06A | 2007 | 61 | 13 | 19 | 59.251 | P | 0.200 | -0.026 |
| SNG5 | 2007 | 61 | 13 | 19 | 59.499 | P | 0.200 | -0.299 |
| SNG7 | 2007 | 61 | 13 | 20 | 0.066  | P | 0.200 | -0.224 |
| M07A | 2007 | 61 | 13 | 20 | 0.094  | P | 0.200 | -0.097 |
| O04C | 2007 | 61 | 13 | 20 | 0.441  | P | 0.200 | -0.425 |
| ELFS | 2007 | 61 | 13 | 20 | 1.021  | P | 0.200 | -0.206 |
| HOPS | 2007 | 61 | 13 | 20 | 1.521  | P | 0.200 | 0.597  |
| M06C | 2007 | 61 | 13 | 20 | 2.618  | P | 0.200 | 0.021  |
| HATC | 2007 | 61 | 13 | 20 | 3.140  | P | 0.200 | -0.545 |
| GASB | 2007 | 61 | 13 | 20 | 3.175  | P | 0.200 | 0.594  |
| L07A | 2007 | 61 | 13 | 20 | 3.418  | P | 0.200 | 0.408  |
| WDC  | 2007 | 61 | 13 | 20 | 3.976  | P | 0.200 | -1.500 |
| P01C | 2007 | 61 | 13 | 20 | 4.060  | P | 0.200 | 0.497  |
| O02C | 2007 | 61 | 13 | 20 | 4.378  | P | 0.200 | -0.261 |
| M05C | 2007 | 61 | 13 | 20 | 4.585  | P | 0.200 | -0.268 |
| M03C | 2007 | 61 | 13 | 20 | 6.223  | P | 0.200 | -0.797 |
| L05A | 2007 | 61 | 13 | 20 | 6.940  | P | 0.200 | 0.128  |
| O01C | 2007 | 61 | 13 | 20 | 7.838  | P | 0.200 | 0.625  |
| M04C | 2007 | 61 | 13 | 20 | 7.843  | P | 0.200 | -0.426 |
| N02C | 2007 | 61 | 13 | 20 | 8.434  | P | 0.200 | -0.007 |
| M02C | 2007 | 61 | 13 | 20 | 8.861  | P | 0.200 | -0.422 |
| L04A | 2007 | 61 | 13 | 20 | 9.302  | P | 0.200 | -0.480 |
| K05A | 2007 | 61 | 13 | 20 | 9.648  | P | 0.200 | 0.087  |
| JCC  | 2007 | 61 | 13 | 20 | 10.394 | P | 0.200 | 0.329  |
| K04A | 2007 | 61 | 13 | 20 | 10.714 | P | 0.200 | -0.297 |
| J05A | 2007 | 61 | 13 | 20 | 12.191 | P | 0.200 | -0.133 |
| J04A | 2007 | 61 | 13 | 20 | 13.905 | P | 0.200 | -0.210 |
| L02A | 2007 | 61 | 13 | 20 | 13.907 | P | 0.200 | 0.156  |
| M01C | 2007 | 61 | 13 | 20 | 14.142 | P | 0.200 | 0.168  |
| I04A | 2007 | 61 | 13 | 20 | 15.851 | P | 0.200 | -0.680 |
| J03A | 2007 | 61 | 13 | 20 | 16.096 | P | 0.200 | -0.352 |
| DBO  | 2007 | 61 | 13 | 20 | 16.415 | P | 0.200 | 0.217  |
| J02A | 2007 | 61 | 13 | 20 | 17.942 | P | 0.200 | 0.236  |
| I03A | 2007 | 61 | 13 | 20 | 19.255 | P | 0.200 | 0.066  |

|      |     |    |    |         |           |           |          |     |        |
|------|-----|----|----|---------|-----------|-----------|----------|-----|--------|
| 2007 | 145 | 17 | 47 | 32.0228 | -24.22200 | -67.02700 | 180.5000 | 328 | -0.001 |
|------|-----|----|----|---------|-----------|-----------|----------|-----|--------|

|      |      |     |    |    |        |   |       |        |
|------|------|-----|----|----|--------|---|-------|--------|
| SVD  | 2007 | 145 | 17 | 58 | 54.120 | P | 0.200 | 0.412  |
| HEC  | 2007 | 145 | 17 | 58 | 54.505 | P | 0.200 | 0.411  |
| V11A | 2007 | 145 | 17 | 58 | 55.221 | P | 0.200 | 0.186  |
| TUQ  | 2007 | 145 | 17 | 58 | 55.365 | P | 0.200 | 0.259  |
| CIA  | 2007 | 145 | 17 | 58 | 55.620 | P | 0.200 | 0.063  |
| BFS  | 2007 | 145 | 17 | 58 | 56.252 | P | 0.200 | -0.079 |
| FMP  | 2007 | 145 | 17 | 58 | 56.400 | P | 0.200 | -0.008 |
| RRX  | 2007 | 145 | 17 | 58 | 56.754 | P | 0.200 | 0.256  |
| ADO  | 2007 | 145 | 17 | 58 | 56.804 | P | 0.200 | 0.164  |
| RPV  | 2007 | 145 | 17 | 58 | 56.851 | P | 0.200 | 0.063  |
| MWC  | 2007 | 145 | 17 | 58 | 57.710 | P | 0.200 | 0.109  |
| U11A | 2007 | 145 | 17 | 58 | 57.778 | P | 0.200 | 0.426  |
| PASC | 2007 | 145 | 17 | 58 | 57.793 | P | 0.200 | 0.024  |
| GSC  | 2007 | 145 | 17 | 58 | 57.846 | P | 0.200 | 0.264  |
| CHF  | 2007 | 145 | 17 | 58 | 57.973 | P | 0.200 | 0.117  |

|      |      |     |    |    |        |   |       |        |
|------|------|-----|----|----|--------|---|-------|--------|
| SHO  | 2007 | 145 | 17 | 58 | 58.066 | P | 0.200 | 0.132  |
| DJJ  | 2007 | 145 | 17 | 58 | 58.568 | P | 0.200 | 0.092  |
| VCS  | 2007 | 145 | 17 | 58 | 58.615 | P | 0.200 | -0.225 |
| DEC  | 2007 | 145 | 17 | 58 | 58.617 | P | 0.200 | 0.084  |
| SNCC | 2007 | 145 | 17 | 58 | 58.725 | P | 0.200 | -0.082 |
| LGU  | 2007 | 145 | 17 | 59 | 0.326  | P | 0.200 | -0.165 |
| T11A | 2007 | 145 | 17 | 59 | 0.601  | P | 0.200 | 0.456  |
| U10A | 2007 | 145 | 17 | 59 | 0.850  | P | 0.200 | 0.502  |
| OSI  | 2007 | 145 | 17 | 59 | 1.075  | P | 0.200 | -0.247 |
| LRL  | 2007 | 145 | 17 | 59 | 1.295  | P | 0.200 | 0.182  |
| SLA  | 2007 | 145 | 17 | 59 | 1.425  | P | 0.200 | 0.059  |
| SCZ2 | 2007 | 145 | 17 | 59 | 1.815  | P | 0.200 | -0.202 |
| FUR  | 2007 | 145 | 17 | 59 | 2.455  | P | 0.200 | 0.408  |
| TPNV | 2007 | 145 | 17 | 59 | 2.784  | P | 0.200 | 0.664  |
| MPM  | 2007 | 145 | 17 | 59 | 2.796  | P | 0.200 | -0.065 |
| ARV  | 2007 | 145 | 17 | 59 | 3.826  | P | 0.200 | 0.400  |
| SBC  | 2007 | 145 | 17 | 59 | 3.851  | P | 0.200 | -0.080 |
| S11A | 2007 | 145 | 17 | 59 | 4.258  | P | 0.200 | 0.961  |
| MPP  | 2007 | 145 | 17 | 59 | 6.300  | P | 0.200 | 0.169  |
| GRA  | 2007 | 145 | 17 | 59 | 6.421  | P | 0.200 | 0.534  |
| CWC  | 2007 | 145 | 17 | 59 | 6.485  | P | 0.200 | 0.300  |
| VES  | 2007 | 145 | 17 | 59 | 7.009  | P | 0.200 | -0.073 |
| S10A | 2007 | 145 | 17 | 59 | 7.335  | P | 0.200 | 0.276  |
| Q11A | 2007 | 145 | 17 | 59 | 8.073  | P | 0.200 | 0.359  |
| R10A | 2007 | 145 | 17 | 59 | 8.307  | P | 0.200 | 0.766  |
| RCT  | 2007 | 145 | 17 | 59 | 8.364  | P | 0.200 | -0.993 |
| S09A | 2007 | 145 | 17 | 59 | 8.427  | P | 0.200 | 0.199  |
| SMM  | 2007 | 145 | 17 | 59 | 8.536  | P | 0.200 | 0.320  |
| TIN  | 2007 | 145 | 17 | 59 | 9.249  | P | 0.200 | 0.387  |
| HELL | 2007 | 145 | 17 | 59 | 9.692  | P | 0.200 | -0.344 |
| TPH  | 2007 | 145 | 17 | 59 | 9.818  | P | 0.200 | 0.214  |
| R09A | 2007 | 145 | 17 | 59 | 9.935  | P | 0.200 | 0.111  |
| V05C | 2007 | 145 | 17 | 59 | 10.159 | P | 0.200 | 0.165  |
| Q10A | 2007 | 145 | 17 | 59 | 10.493 | P | 0.200 | 0.544  |
| PHL  | 2007 | 145 | 17 | 59 | 10.521 | P | 0.200 | 0.024  |
| S08C | 2007 | 145 | 17 | 59 | 10.944 | P | 0.200 | 0.306  |
| SN14 | 2007 | 145 | 17 | 59 | 11.258 | P | 0.200 | -0.105 |
| PKD  | 2007 | 145 | 17 | 59 | 12.208 | P | 0.200 | -0.180 |
| T06C | 2007 | 145 | 17 | 59 | 12.263 | P | 0.200 | -1.103 |
| V04C | 2007 | 145 | 17 | 59 | 12.531 | P | 0.200 | 0.096  |
| Q09A | 2007 | 145 | 17 | 59 | 12.599 | P | 0.200 | 0.174  |
| SN34 | 2007 | 145 | 17 | 59 | 12.813 | P | 0.200 | -0.163 |
| MLAC | 2007 | 145 | 17 | 59 | 13.334 | P | 0.200 | 0.239  |
| R08A | 2007 | 145 | 17 | 59 | 13.544 | P | 0.200 | 0.029  |
| P10A | 2007 | 145 | 17 | 59 | 13.763 | P | 0.200 | 0.535  |
| SN43 | 2007 | 145 | 17 | 59 | 13.835 | P | 0.200 | -0.595 |
| Q08A | 2007 | 145 | 17 | 59 | 14.532 | P | 0.200 | -0.167 |
| U04C | 2007 | 145 | 17 | 59 | 14.809 | P | 0.200 | 0.256  |
| P09A | 2007 | 145 | 17 | 59 | 14.858 | P | 0.200 | -0.209 |
| V03C | 2007 | 145 | 17 | 59 | 15.327 | P | 0.200 | 0.462  |
| R07C | 2007 | 145 | 17 | 59 | 15.846 | P | 0.200 | 0.438  |
| SN63 | 2007 | 145 | 17 | 59 | 16.339 | P | 0.200 | -0.219 |
| T05C | 2007 | 145 | 17 | 59 | 16.568 | P | 0.200 | 0.494  |
| S05C | 2007 | 145 | 17 | 59 | 16.685 | P | 0.200 | 0.106  |
| SN64 | 2007 | 145 | 17 | 59 | 16.705 | P | 0.200 | 0.095  |
| S06C | 2007 | 145 | 17 | 59 | 17.100 | P | 0.200 | -0.105 |
| O09A | 2007 | 145 | 17 | 59 | 17.252 | P | 0.200 | -0.202 |
| SN74 | 2007 | 145 | 17 | 59 | 17.738 | P | 0.200 | -0.128 |
| SN75 | 2007 | 145 | 17 | 59 | 17.912 | P | 0.200 | 0.116  |
| BMN  | 2007 | 145 | 17 | 59 | 18.032 | P | 0.200 | -0.416 |
| Q07A | 2007 | 145 | 17 | 59 | 18.143 | P | 0.200 | 0.412  |
| SAO  | 2007 | 145 | 17 | 59 | 18.157 | P | 0.200 | -0.077 |
| P08A | 2007 | 145 | 17 | 59 | 18.401 | P | 0.200 | 0.115  |

|      |      |     |    |    |        |   |       |        |
|------|------|-----|----|----|--------|---|-------|--------|
| PACP | 2007 | 145 | 17 | 59 | 18.851 | P | 0.200 | 0.281  |
| R06C | 2007 | 145 | 17 | 59 | 18.893 | P | 0.200 | 0.572  |
| SN84 | 2007 | 145 | 17 | 59 | 18.978 | P | 0.200 | -0.168 |
| CMB  | 2007 | 145 | 17 | 59 | 19.142 | P | 0.200 | -0.277 |
| SN85 | 2007 | 145 | 17 | 59 | 19.147 | P | 0.200 | 0.066  |
| SN98 | 2007 | 145 | 17 | 59 | 19.978 | P | 0.200 | 0.268  |
| SN95 | 2007 | 145 | 17 | 59 | 19.995 | P | 0.200 | -0.243 |
| SN87 | 2007 | 145 | 17 | 59 | 20.167 | P | 0.200 | 0.528  |
| SN96 | 2007 | 145 | 17 | 59 | 20.252 | P | 0.200 | 0.228  |
| SN93 | 2007 | 145 | 17 | 59 | 20.349 | P | 0.200 | 0.030  |
| O08A | 2007 | 145 | 17 | 59 | 20.386 | P | 0.200 | -0.482 |
| S04C | 2007 | 145 | 17 | 59 | 20.438 | P | 0.200 | 0.131  |
| P07A | 2007 | 145 | 17 | 59 | 20.452 | P | 0.200 | 0.352  |
| SN97 | 2007 | 145 | 17 | 59 | 20.977 | P | 0.200 | 0.477  |
| SNA8 | 2007 | 145 | 17 | 59 | 21.243 | P | 0.200 | 0.338  |
| MHC  | 2007 | 145 | 17 | 59 | 21.270 | P | 0.200 | 0.280  |
| R05C | 2007 | 145 | 17 | 59 | 21.274 | P | 0.200 | 0.171  |
| SNA4 | 2007 | 145 | 17 | 59 | 21.376 | P | 0.200 | -0.188 |
| SNA5 | 2007 | 145 | 17 | 59 | 21.578 | P | 0.200 | 0.175  |
| SNA3 | 2007 | 145 | 17 | 59 | 21.593 | P | 0.200 | -0.046 |
| N08A | 2007 | 145 | 17 | 59 | 21.788 | P | 0.200 | -0.760 |
| BNLO | 2007 | 145 | 17 | 59 | 21.841 | P | 0.200 | -0.184 |
| SNA7 | 2007 | 145 | 17 | 59 | 21.968 | P | 0.200 | 0.354  |
| R04C | 2007 | 145 | 17 | 59 | 22.008 | P | 0.200 | 0.309  |
| O07A | 2007 | 145 | 17 | 59 | 22.090 | P | 0.200 | -0.304 |
| SNB9 | 2007 | 145 | 17 | 59 | 22.163 | P | 0.200 | 0.255  |
| SNB6 | 2007 | 145 | 17 | 59 | 22.308 | P | 0.200 | 0.105  |
| WCN  | 2007 | 145 | 17 | 59 | 22.554 | P | 0.200 | 0.448  |
| WENL | 2007 | 145 | 17 | 59 | 22.616 | P | 0.200 | 0.545  |
| SNB5 | 2007 | 145 | 17 | 59 | 22.640 | P | 0.200 | -0.206 |
| LAVA | 2007 | 145 | 17 | 59 | 22.710 | P | 0.200 | -0.316 |
| SNB7 | 2007 | 145 | 17 | 59 | 22.769 | P | 0.200 | 0.332  |
| JRSC | 2007 | 145 | 17 | 59 | 22.846 | P | 0.200 | -0.040 |
| SNB3 | 2007 | 145 | 17 | 59 | 22.955 | P | 0.200 | -0.096 |
| SNC4 | 2007 | 145 | 17 | 59 | 23.438 | P | 0.200 | -0.385 |
| SNC6 | 2007 | 145 | 17 | 59 | 23.552 | P | 0.200 | 0.137  |
| SNC5 | 2007 | 145 | 17 | 59 | 23.767 | P | 0.200 | -0.313 |
| P06A | 2007 | 145 | 17 | 59 | 23.937 | P | 0.200 | 0.066  |
| BDM  | 2007 | 145 | 17 | 59 | 24.015 | P | 0.200 | 0.303  |
| SNC8 | 2007 | 145 | 17 | 59 | 24.079 | P | 0.200 | 0.415  |
| SNC3 | 2007 | 145 | 17 | 59 | 24.186 | P | 0.200 | -0.053 |
| SNC7 | 2007 | 145 | 17 | 59 | 24.318 | P | 0.200 | 0.144  |
| BRK  | 2007 | 145 | 17 | 59 | 24.587 | P | 0.200 | 0.052  |
| BRIB | 2007 | 145 | 17 | 59 | 24.598 | P | 0.200 | 0.087  |
| BKS  | 2007 | 145 | 17 | 59 | 24.616 | P | 0.200 | -0.012 |
| SND5 | 2007 | 145 | 17 | 59 | 24.647 | P | 0.200 | -0.405 |
| SND4 | 2007 | 145 | 17 | 59 | 24.727 | P | 0.200 | -0.503 |
| P05C | 2007 | 145 | 17 | 59 | 24.894 | P | 0.200 | 0.311  |
| SND8 | 2007 | 145 | 17 | 59 | 24.917 | P | 0.200 | 0.173  |
| SND9 | 2007 | 145 | 17 | 59 | 24.948 | P | 0.200 | 0.274  |
| O06A | 2007 | 145 | 17 | 59 | 25.367 | P | 0.200 | 0.171  |
| Q04C | 2007 | 145 | 17 | 59 | 25.421 | P | 0.200 | 0.217  |
| SND7 | 2007 | 145 | 17 | 59 | 25.786 | P | 0.200 | 0.086  |
| SNE6 | 2007 | 145 | 17 | 59 | 25.886 | P | 0.200 | -0.065 |
| BEK  | 2007 | 145 | 17 | 59 | 25.938 | P | 0.200 | 0.126  |
| SNE9 | 2007 | 145 | 17 | 59 | 25.988 | P | 0.200 | 0.027  |
| FARB | 2007 | 145 | 17 | 59 | 26.037 | P | 0.200 | -0.413 |
| SNE4 | 2007 | 145 | 17 | 59 | 26.113 | P | 0.200 | -0.431 |
| SNE5 | 2007 | 145 | 17 | 59 | 26.216 | P | 0.200 | -0.272 |
| CVS  | 2007 | 145 | 17 | 59 | 26.527 | P | 0.200 | -0.370 |
| SNE7 | 2007 | 145 | 17 | 59 | 26.883 | P | 0.200 | 0.043  |
| SNF9 | 2007 | 145 | 17 | 59 | 26.965 | P | 0.200 | -0.135 |
| SNF6 | 2007 | 145 | 17 | 59 | 27.041 | P | 0.200 | -0.452 |

|      |      |     |    |    |        |   |       |        |
|------|------|-----|----|----|--------|---|-------|--------|
| Q03C | 2007 | 145 | 17 | 59 | 27.081 | P | 0.200 | 0.575  |
| MCCM | 2007 | 145 | 17 | 59 | 27.219 | P | 0.200 | -0.224 |
| N06A | 2007 | 145 | 17 | 59 | 27.269 | P | 0.200 | 0.014  |
| SUTB | 2007 | 145 | 17 | 59 | 27.330 | P | 0.200 | -0.489 |
| SNF8 | 2007 | 145 | 17 | 59 | 27.344 | P | 0.200 | 0.014  |
| M07A | 2007 | 145 | 17 | 59 | 27.539 | P | 0.200 | -0.156 |
| O05C | 2007 | 145 | 17 | 59 | 27.797 | P | 0.200 | 0.061  |
| ORV  | 2007 | 145 | 17 | 59 | 28.085 | P | 0.200 | 0.155  |
| SNG5 | 2007 | 145 | 17 | 59 | 28.434 | P | 0.200 | -0.409 |
| SNG7 | 2007 | 145 | 17 | 59 | 28.723 | P | 0.200 | -0.341 |
| MNRC | 2007 | 145 | 17 | 59 | 28.748 | P | 0.200 | 0.128  |
| O04C | 2007 | 145 | 17 | 59 | 29.147 | P | 0.200 | -0.415 |
| ELFS | 2007 | 145 | 17 | 59 | 29.479 | P | 0.200 | -0.168 |
| M06C | 2007 | 145 | 17 | 59 | 30.647 | P | 0.200 | -0.108 |
| L07A | 2007 | 145 | 17 | 59 | 30.773 | P | 0.200 | 0.333  |
| HATC | 2007 | 145 | 17 | 59 | 31.866 | P | 0.200 | -0.524 |
| GASB | 2007 | 145 | 17 | 59 | 32.510 | P | 0.200 | 0.298  |
| WDC  | 2007 | 145 | 17 | 59 | 32.944 | P | 0.200 | -1.789 |
| M05C | 2007 | 145 | 17 | 59 | 33.015 | P | 0.200 | -0.247 |
| O02C | 2007 | 145 | 17 | 59 | 33.429 | P | 0.200 | -0.685 |
| P01C | 2007 | 145 | 17 | 59 | 33.728 | P | 0.200 | 0.214  |
| M03C | 2007 | 145 | 17 | 59 | 34.900 | P | 0.200 | -0.965 |
| L05A | 2007 | 145 | 17 | 59 | 34.991 | P | 0.200 | 0.112  |
| M04C | 2007 | 145 | 17 | 59 | 36.299 | P | 0.200 | -0.529 |
| O01C | 2007 | 145 | 17 | 59 | 37.493 | P | 0.200 | 0.345  |
| K05A | 2007 | 145 | 17 | 59 | 37.538 | P | 0.200 | 0.079  |
| N02C | 2007 | 145 | 17 | 59 | 37.653 | P | 0.200 | -0.271 |
| M02C | 2007 | 145 | 17 | 59 | 37.663 | P | 0.200 | -0.752 |
| L04A | 2007 | 145 | 17 | 59 | 37.717 | P | 0.200 | -0.555 |
| YBH  | 2007 | 145 | 17 | 59 | 37.774 | P | 0.200 | -1.300 |
| K04A | 2007 | 145 | 17 | 59 | 38.839 | P | 0.200 | -0.469 |
| JCC  | 2007 | 145 | 17 | 59 | 39.918 | P | 0.200 | 0.057  |
| J05A | 2007 | 145 | 17 | 59 | 39.979 | P | 0.200 | -0.249 |
| HUMO | 2007 | 145 | 17 | 59 | 41.897 | P | 0.200 | -0.677 |
| J04A | 2007 | 145 | 17 | 59 | 42.029 | P | 0.200 | -0.353 |
| L02A | 2007 | 145 | 17 | 59 | 42.853 | P | 0.200 | -0.094 |
| M01C | 2007 | 145 | 17 | 59 | 43.596 | P | 0.200 | 0.133  |
| I04A | 2007 | 145 | 17 | 59 | 43.975 | P | 0.200 | -0.819 |
| K02A | 2007 | 145 | 17 | 59 | 44.456 | P | 0.200 | -0.196 |
| J03A | 2007 | 145 | 17 | 59 | 44.857 | P | 0.200 | -0.169 |
| DBO  | 2007 | 145 | 17 | 59 | 45.009 | P | 0.200 | 0.034  |
| J02A | 2007 | 145 | 17 | 59 | 46.613 | P | 0.200 | 0.043  |
| K01A | 2007 | 145 | 17 | 59 | 47.528 | P | 0.200 | 0.126  |
| I03A | 2007 | 145 | 17 | 59 | 47.548 | P | 0.200 | -0.220 |

|      |      |     |    |         |           |           |         |       |        |
|------|------|-----|----|---------|-----------|-----------|---------|-------|--------|
| 2007 | 227  | 23  | 40 | 58.9247 | -13.38600 | -76.60300 | 39.0000 | 347   | -0.001 |
| SVD  | 2007 | 227 | 23 | 51      | 8.669     | P         | 0.200   | 0.581 |        |
| BBR  | 2007 | 227 | 23 | 51      | 8.886     | P         | 0.200   | 0.598 |        |
| HEC  | 2007 | 227 | 23 | 51      | 8.941     | P         | 0.200   | 0.402 |        |
| TUQ  | 2007 | 227 | 23 | 51      | 9.992     | P         | 0.200   | 0.174 |        |
| V11A | 2007 | 227 | 23 | 51      | 9.996     | P         | 0.200   | 0.214 |        |
| CIA  | 2007 | 227 | 23 | 51      | 10.364    | P         | 0.200   | 0.089 |        |
| BFS  | 2007 | 227 | 23 | 51      | 11.209    | P         | 0.200   | 0.033 |        |
| VTV  | 2007 | 227 | 23 | 51      | 11.281    | P         | 0.200   | 0.005 |        |
| FMP  | 2007 | 227 | 23 | 51      | 11.336    | P         | 0.200   | 0.089 |        |
| RRX  | 2007 | 227 | 23 | 51      | 11.679    | P         | 0.200   | 0.294 |        |
| ADO  | 2007 | 227 | 23 | 51      | 11.802    | P         | 0.200   | 0.223 |        |
| RPV  | 2007 | 227 | 23 | 51      | 11.883    | P         | 0.200   | 0.122 |        |
| U11A | 2007 | 227 | 23 | 51      | 12.714    | P         | 0.200   | 0.182 |        |
| MWC  | 2007 | 227 | 23 | 51      | 12.914    | P         | 0.200   | 0.218 |        |
| PASC | 2007 | 227 | 23 | 51      | 12.941    | P         | 0.200   | 0.051 |        |
| GSC  | 2007 | 227 | 23 | 51      | 12.987    | P         | 0.200   | 0.315 |        |
| USC  | 2007 | 227 | 23 | 51      | 13.208    | P         | 0.200   | 0.619 |        |

|      |      |     |    |    |        |   |       |        |
|------|------|-----|----|----|--------|---|-------|--------|
| SHO  | 2007 | 227 | 23 | 51 | 13.272 | P | 0.200 | 0.040  |
| CHF  | 2007 | 227 | 23 | 51 | 13.287 | P | 0.200 | 0.263  |
| DJJ  | 2007 | 227 | 23 | 51 | 13.896 | P | 0.200 | 0.162  |
| DEC  | 2007 | 227 | 23 | 51 | 13.973 | P | 0.200 | 0.140  |
| VCS  | 2007 | 227 | 23 | 51 | 14.150 | P | 0.200 | 0.014  |
| EDW2 | 2007 | 227 | 23 | 51 | 15.279 | P | 0.200 | -0.130 |
| LGU  | 2007 | 227 | 23 | 51 | 16.112 | P | 0.200 | -0.048 |
| T11A | 2007 | 227 | 23 | 51 | 16.343 | P | 0.200 | 0.398  |
| U10A | 2007 | 227 | 23 | 51 | 16.411 | P | 0.200 | 0.359  |
| OSI  | 2007 | 227 | 23 | 51 | 16.999 | P | 0.200 | -0.108 |
| LRL  | 2007 | 227 | 23 | 51 | 17.108 | P | 0.200 | 0.195  |
| SLA  | 2007 | 227 | 23 | 51 | 17.217 | P | 0.200 | -0.024 |
| SCZ2 | 2007 | 227 | 23 | 51 | 17.758 | P | 0.200 | -0.257 |
| FUR  | 2007 | 227 | 23 | 51 | 18.310 | P | 0.200 | 0.166  |
| TPNV | 2007 | 227 | 23 | 51 | 18.786 | P | 0.200 | 0.534  |
| MPM  | 2007 | 227 | 23 | 51 | 19.042 | P | 0.200 | 0.067  |
| ARV  | 2007 | 227 | 23 | 51 | 19.896 | P | 0.200 | 0.207  |
| SBC  | 2007 | 227 | 23 | 51 | 20.210 | P | 0.200 | -0.059 |
| S11A | 2007 | 227 | 23 | 51 | 20.323 | P | 0.200 | 0.586  |
| ISA  | 2007 | 227 | 23 | 51 | 21.164 | P | 0.200 | 0.242  |
| MPP  | 2007 | 227 | 23 | 51 | 22.892 | P | 0.200 | 0.019  |
| R11A | 2007 | 227 | 23 | 51 | 22.989 | P | 0.200 | 0.332  |
| GRA  | 2007 | 227 | 23 | 51 | 22.992 | P | 0.200 | 0.309  |
| CWC  | 2007 | 227 | 23 | 51 | 23.185 | P | 0.200 | 0.230  |
| VES  | 2007 | 227 | 23 | 51 | 23.922 | P | 0.200 | -0.087 |
| S10A | 2007 | 227 | 23 | 51 | 24.389 | P | 0.200 | 0.189  |
| Q11A | 2007 | 227 | 23 | 51 | 25.377 | P | 0.200 | 0.228  |
| R10A | 2007 | 227 | 23 | 51 | 25.415 | P | 0.200 | 0.579  |
| SMM  | 2007 | 227 | 23 | 51 | 25.553 | P | 0.200 | 0.186  |
| S09A | 2007 | 227 | 23 | 51 | 25.612 | P | 0.200 | 0.063  |
| RCT  | 2007 | 227 | 23 | 51 | 25.976 | P | 0.200 | -0.730 |
| TIN  | 2007 | 227 | 23 | 51 | 26.471 | P | 0.200 | 0.262  |
| TPH  | 2007 | 227 | 23 | 51 | 27.142 | P | 0.200 | -0.059 |
| HELL | 2007 | 227 | 23 | 51 | 27.401 | P | 0.200 | -0.176 |
| R09A | 2007 | 227 | 23 | 51 | 27.563 | P | 0.200 | 0.088  |
| V05C | 2007 | 227 | 23 | 51 | 27.664 | P | 0.200 | 0.216  |
| PHL  | 2007 | 227 | 23 | 51 | 28.019 | P | 0.200 | -0.015 |
| Q10A | 2007 | 227 | 23 | 51 | 28.210 | P | 0.200 | 0.452  |
| S08C | 2007 | 227 | 23 | 51 | 28.585 | P | 0.200 | 0.280  |
| U05C | 2007 | 227 | 23 | 51 | 29.782 | P | 0.200 | -0.470 |
| PKD  | 2007 | 227 | 23 | 51 | 30.087 | P | 0.200 | -0.237 |
| V04C | 2007 | 227 | 23 | 51 | 30.407 | P | 0.200 | 0.054  |
| T06C | 2007 | 227 | 23 | 51 | 30.544 | P | 0.200 | -1.038 |
| Q09A | 2007 | 227 | 23 | 51 | 30.785 | P | 0.200 | 0.145  |
| MLAC | 2007 | 227 | 23 | 51 | 31.469 | P | 0.200 | 0.211  |
| R08A | 2007 | 227 | 23 | 51 | 31.884 | P | 0.200 | 0.081  |
| P10A | 2007 | 227 | 23 | 51 | 31.950 | P | 0.200 | 0.206  |
| U04C | 2007 | 227 | 23 | 51 | 32.946 | P | 0.200 | -0.043 |
| Q08A | 2007 | 227 | 23 | 51 | 33.395 | P | 0.200 | 0.042  |
| V03C | 2007 | 227 | 23 | 51 | 33.619 | P | 0.200 | 0.258  |
| P09A | 2007 | 227 | 23 | 51 | 33.682 | P | 0.200 | -0.164 |
| SN55 | 2007 | 227 | 23 | 51 | 34.393 | P | 0.200 | -0.010 |
| R07C | 2007 | 227 | 23 | 51 | 34.417 | P | 0.200 | 0.351  |
| YO10 | 2007 | 227 | 23 | 51 | 34.585 | P | 0.200 | -0.122 |
| YO11 | 2007 | 227 | 23 | 51 | 34.613 | P | 0.200 | -0.062 |
| YO09 | 2007 | 227 | 23 | 51 | 34.687 | P | 0.200 | -0.056 |
| YO08 | 2007 | 227 | 23 | 51 | 34.767 | P | 0.200 | -0.058 |
| YO07 | 2007 | 227 | 23 | 51 | 34.928 | P | 0.200 | -0.154 |
| SN63 | 2007 | 227 | 23 | 51 | 35.076 | P | 0.200 | -0.310 |
| YO01 | 2007 | 227 | 23 | 51 | 35.163 | P | 0.200 | -0.241 |
| YO06 | 2007 | 227 | 23 | 51 | 35.221 | P | 0.200 | -0.109 |
| S05C | 2007 | 227 | 23 | 51 | 35.257 | P | 0.200 | -0.177 |
| YO02 | 2007 | 227 | 23 | 51 | 35.266 | P | 0.200 | -0.264 |

|      |      |     |    |    |        |   |       |        |
|------|------|-----|----|----|--------|---|-------|--------|
| YO03 | 2007 | 227 | 23 | 51 | 35.290 | P | 0.200 | -0.189 |
| YO04 | 2007 | 227 | 23 | 51 | 35.394 | P | 0.200 | -0.050 |
| YO05 | 2007 | 227 | 23 | 51 | 35.450 | P | 0.200 | -0.024 |
| SN64 | 2007 | 227 | 23 | 51 | 35.456 | P | 0.200 | 0.011  |
| S06C | 2007 | 227 | 23 | 51 | 36.035 | P | 0.200 | -0.118 |
| HAST | 2007 | 227 | 23 | 51 | 36.232 | P | 0.200 | 0.007  |
| O09A | 2007 | 227 | 23 | 51 | 36.583 | P | 0.200 | -0.233 |
| Q07A | 2007 | 227 | 23 | 51 | 37.107 | P | 0.200 | 0.174  |
| SAO  | 2007 | 227 | 23 | 51 | 37.316 | P | 0.200 | -0.056 |
| P08A | 2007 | 227 | 23 | 51 | 37.590 | P | 0.200 | -0.108 |
| PACP | 2007 | 227 | 23 | 51 | 37.882 | P | 0.200 | 0.084  |
| R06C | 2007 | 227 | 23 | 51 | 38.042 | P | 0.200 | 0.484  |
| CMB  | 2007 | 227 | 23 | 51 | 38.721 | P | 0.200 | -0.095 |
| SN86 | 2007 | 227 | 23 | 51 | 39.221 | P | 0.200 | 0.327  |
| SN98 | 2007 | 227 | 23 | 51 | 39.422 | P | 0.200 | 0.213  |
| SN87 | 2007 | 227 | 23 | 51 | 39.486 | P | 0.200 | 0.417  |
| SN96 | 2007 | 227 | 23 | 51 | 39.862 | P | 0.200 | 0.288  |
| P07A | 2007 | 227 | 23 | 51 | 39.953 | P | 0.200 | 0.109  |
| SN93 | 2007 | 227 | 23 | 51 | 40.100 | P | 0.200 | 0.127  |
| S04C | 2007 | 227 | 23 | 51 | 40.157 | P | 0.200 | 0.238  |
| O08A | 2007 | 227 | 23 | 51 | 40.268 | P | 0.200 | -0.557 |
| SN97 | 2007 | 227 | 23 | 51 | 40.660 | P | 0.200 | 0.497  |
| MHC  | 2007 | 227 | 23 | 51 | 41.022 | P | 0.200 | 0.352  |
| R05C | 2007 | 227 | 23 | 51 | 41.132 | P | 0.200 | 0.302  |
| SNA4 | 2007 | 227 | 23 | 51 | 41.403 | P | 0.200 | 0.005  |
| SNA5 | 2007 | 227 | 23 | 51 | 41.488 | P | 0.200 | 0.242  |
| SNA3 | 2007 | 227 | 23 | 51 | 41.633 | P | 0.200 | 0.142  |
| BNLO | 2007 | 227 | 23 | 51 | 41.688 | P | 0.200 | -0.196 |
| SNA7 | 2007 | 227 | 23 | 51 | 41.861 | P | 0.200 | 0.423  |
| R04C | 2007 | 227 | 23 | 51 | 42.042 | P | 0.200 | 0.411  |
| SNB9 | 2007 | 227 | 23 | 51 | 42.062 | P | 0.200 | 0.200  |
| O07A | 2007 | 227 | 23 | 51 | 42.297 | P | 0.200 | -0.316 |
| SNB6 | 2007 | 227 | 23 | 51 | 42.469 | P | 0.200 | 0.277  |
| N08A | 2007 | 227 | 23 | 51 | 42.477 | P | 0.200 | -0.421 |
| WENL | 2007 | 227 | 23 | 51 | 42.645 | P | 0.200 | 0.609  |
| WCN  | 2007 | 227 | 23 | 51 | 42.650 | P | 0.200 | 0.525  |
| SNB5 | 2007 | 227 | 23 | 51 | 42.930 | P | 0.200 | -0.004 |
| SNB7 | 2007 | 227 | 23 | 51 | 42.947 | P | 0.200 | 0.456  |
| JRSC | 2007 | 227 | 23 | 51 | 43.080 | P | 0.200 | 0.078  |
| LAVA | 2007 | 227 | 23 | 51 | 43.104 | P | 0.200 | -0.086 |
| SNB3 | 2007 | 227 | 23 | 51 | 43.254 | P | 0.200 | 0.049  |
| SNC6 | 2007 | 227 | 23 | 51 | 43.943 | P | 0.200 | 0.273  |
| SNC4 | 2007 | 227 | 23 | 51 | 44.081 | P | 0.200 | -0.117 |
| SNC5 | 2007 | 227 | 23 | 51 | 44.330 | P | 0.200 | -0.138 |
| BDM  | 2007 | 227 | 23 | 51 | 44.406 | P | 0.200 | 0.431  |
| P06A | 2007 | 227 | 23 | 51 | 44.416 | P | 0.200 | 0.193  |
| SNC3 | 2007 | 227 | 23 | 51 | 44.718 | P | 0.200 | 0.094  |
| SNC7 | 2007 | 227 | 23 | 51 | 44.740 | P | 0.200 | 0.197  |
| BRIB | 2007 | 227 | 23 | 51 | 45.046 | P | 0.200 | 0.132  |
| BRK  | 2007 | 227 | 23 | 51 | 45.123 | P | 0.200 | 0.113  |
| N07B | 2007 | 227 | 23 | 51 | 45.139 | P | 0.200 | -0.575 |
| BKS  | 2007 | 227 | 23 | 51 | 45.188 | P | 0.200 | 0.125  |
| P05C | 2007 | 227 | 23 | 51 | 45.485 | P | 0.200 | 0.383  |
| SND5 | 2007 | 227 | 23 | 51 | 45.496 | P | 0.200 | -0.188 |
| SND9 | 2007 | 227 | 23 | 51 | 45.508 | P | 0.200 | 0.245  |
| SND8 | 2007 | 227 | 23 | 51 | 45.510 | P | 0.200 | 0.219  |
| SND4 | 2007 | 227 | 23 | 51 | 45.598 | P | 0.200 | -0.287 |
| O06A | 2007 | 227 | 23 | 51 | 46.049 | P | 0.200 | 0.083  |
| Q04C | 2007 | 227 | 23 | 51 | 46.066 | P | 0.200 | 0.240  |
| SND7 | 2007 | 227 | 23 | 51 | 46.712 | P | 0.200 | 0.257  |
| SNE6 | 2007 | 227 | 23 | 51 | 46.804 | P | 0.200 | 0.054  |
| BEK  | 2007 | 227 | 23 | 51 | 46.830 | P | 0.200 | 0.190  |
| SNE9 | 2007 | 227 | 23 | 51 | 46.960 | P | 0.200 | 0.164  |

|      |      |     |    |    |        |   |       |        |
|------|------|-----|----|----|--------|---|-------|--------|
| FARB | 2007 | 227 | 23 | 51 | 46.981 | P | 0.200 | -0.301 |
| SNE5 | 2007 | 227 | 23 | 51 | 47.149 | P | 0.200 | -0.257 |
| SNE4 | 2007 | 227 | 23 | 51 | 47.193 | P | 0.200 | -0.224 |
| CVS  | 2007 | 227 | 23 | 51 | 47.631 | P | 0.200 | -0.202 |
| SNE7 | 2007 | 227 | 23 | 51 | 47.980 | P | 0.200 | 0.195  |
| Q03C | 2007 | 227 | 23 | 51 | 48.016 | P | 0.200 | 0.645  |
| SNF9 | 2007 | 227 | 23 | 51 | 48.080 | P | 0.200 | -0.108 |
| SNF6 | 2007 | 227 | 23 | 51 | 48.313 | P | 0.200 | -0.264 |
| MCCM | 2007 | 227 | 23 | 51 | 48.400 | P | 0.200 | -0.135 |
| N06A | 2007 | 227 | 23 | 51 | 48.433 | P | 0.200 | -0.073 |
| SNF8 | 2007 | 227 | 23 | 51 | 48.513 | P | 0.200 | 0.102  |
| SUTB | 2007 | 227 | 23 | 51 | 48.621 | P | 0.200 | -0.354 |
| M07A | 2007 | 227 | 23 | 51 | 48.632 | P | 0.200 | -0.489 |
| O05C | 2007 | 227 | 23 | 51 | 49.238 | P | 0.200 | 0.262  |
| ORV  | 2007 | 227 | 23 | 51 | 49.401 | P | 0.200 | 0.211  |
| SNG5 | 2007 | 227 | 23 | 51 | 50.043 | P | 0.200 | -0.175 |
| MNRC | 2007 | 227 | 23 | 51 | 50.283 | P | 0.200 | 0.337  |
| SNG7 | 2007 | 227 | 23 | 51 | 50.527 | P | 0.200 | -0.027 |
| O04C | 2007 | 227 | 23 | 51 | 51.017 | P | 0.200 | -0.142 |
| ELFS | 2007 | 227 | 23 | 51 | 51.182 | P | 0.200 | -0.084 |
| O03C | 2007 | 227 | 23 | 51 | 52.132 | P | 0.200 | -0.921 |
| L07A | 2007 | 227 | 23 | 51 | 52.389 | P | 0.200 | -0.071 |
| M06C | 2007 | 227 | 23 | 51 | 52.587 | P | 0.200 | -0.124 |
| HATC | 2007 | 227 | 23 | 51 | 54.045 | P | 0.200 | -0.525 |
| GASB | 2007 | 227 | 23 | 51 | 54.591 | P | 0.200 | 0.325  |
| M05C | 2007 | 227 | 23 | 51 | 55.350 | P | 0.200 | -0.380 |
| WDC  | 2007 | 227 | 23 | 51 | 55.621 | P | 0.200 | -1.748 |
| O02C | 2007 | 227 | 23 | 51 | 55.947 | P | 0.200 | -0.671 |
| P01C | 2007 | 227 | 23 | 51 | 56.109 | P | 0.200 | 0.302  |
| L05A | 2007 | 227 | 23 | 51 | 57.618 | P | 0.200 | -0.099 |
| M03C | 2007 | 227 | 23 | 51 | 57.771 | P | 0.200 | -1.035 |
| M04C | 2007 | 227 | 23 | 51 | 59.415 | P | 0.200 | -0.586 |
| O01C | 2007 | 227 | 23 | 52 | 0.620  | P | 0.200 | 0.378  |
| K05A | 2007 | 227 | 23 | 52 | 0.812  | P | 0.200 | -0.071 |
| N02C | 2007 | 227 | 23 | 52 | 0.824  | P | 0.200 | -0.368 |
| M02C | 2007 | 227 | 23 | 52 | 0.953  | P | 0.200 | -0.935 |
| L04A | 2007 | 227 | 23 | 52 | 1.179  | P | 0.200 | -0.633 |
| YBH  | 2007 | 227 | 23 | 52 | 1.746  | P | 0.200 | -0.994 |
| K04A | 2007 | 227 | 23 | 52 | 2.569  | P | 0.200 | -0.535 |
| JCC  | 2007 | 227 | 23 | 52 | 3.728  | P | 0.200 | 0.124  |
| J05A | 2007 | 227 | 23 | 52 | 4.103  | P | 0.200 | -0.204 |
| HUMO | 2007 | 227 | 23 | 52 | 6.406  | P | 0.200 | -0.650 |
| J04A | 2007 | 227 | 23 | 52 | 6.432  | P | 0.200 | -0.480 |
| L02A | 2007 | 227 | 23 | 52 | 7.177  | P | 0.200 | -0.270 |
| M01C | 2007 | 227 | 23 | 52 | 8.090  | P | 0.200 | 0.056  |
| I04A | 2007 | 227 | 23 | 52 | 9.098  | P | 0.200 | -0.861 |
| K02A | 2007 | 227 | 23 | 52 | 9.195  | P | 0.200 | -0.384 |
| J03A | 2007 | 227 | 23 | 52 | 9.535  | P | 0.200 | -0.579 |
| DBO  | 2007 | 227 | 23 | 52 | 9.589  | P | 0.200 | -0.452 |
| J02A | 2007 | 227 | 23 | 52 | 12.025 | P | 0.200 | -0.002 |
| I03A | 2007 | 227 | 23 | 52 | 13.084 | P | 0.200 | -0.465 |
| K01A | 2007 | 227 | 23 | 52 | 13.115 | P | 0.200 | 0.182  |
| TAKO | 2007 | 227 | 23 | 52 | 15.200 | P | 0.200 | -0.077 |

|      |      |     |    |         |         |            |         |        |       |
|------|------|-----|----|---------|---------|------------|---------|--------|-------|
| 1988 | 268  | 3   | 22 | 26.6259 | 2.30200 | -101.43600 | 10.0000 | 453    | 0.000 |
| ccr  | 1988 | 268 | 3  | 29      | 42.700  | P          | 0.200   | 0.269  |       |
| mnk  | 1988 | 268 | 3  | 29      | 41.150  | P          | 0.200   | 0.292  |       |
| DTP  | 1988 | 268 | 3  | 29      | 28.770  | P          | 0.200   | -0.427 |       |
| CLC  | 1988 | 268 | 3  | 29      | 32.310  | P          | 0.200   | -0.136 |       |
| LRM  | 1988 | 268 | 3  | 29      | 30.210  | P          | 0.200   | -0.062 |       |
| SRT  | 1988 | 268 | 3  | 29      | 32.200  | P          | 0.200   | 0.193  |       |
| TOW  | 1988 | 268 | 3  | 29      | 33.180  | P          | 0.200   | 0.271  |       |
| WBS  | 1988 | 268 | 3  | 29      | 32.140  | P          | 0.200   | -0.270 |       |



|     |      |     |   |    |        |   |       |        |
|-----|------|-----|---|----|--------|---|-------|--------|
| WCS | 1988 | 268 | 3 | 29 | 34.730 | P | 0.200 | 0.103  |
| WOF | 1988 | 268 | 3 | 29 | 34.250 | P | 0.200 | 0.080  |
| WRC | 1988 | 268 | 3 | 29 | 33.660 | P | 0.200 | -0.096 |
| WSH | 1988 | 268 | 3 | 29 | 30.410 | P | 0.200 | -0.409 |
| XMS | 1988 | 268 | 3 | 29 | 29.690 | P | 0.200 | 0.191  |

|      |     |   |    |         |           |           |         |     |        |
|------|-----|---|----|---------|-----------|-----------|---------|-----|--------|
| 1988 | 217 | 6 | 18 | 46.9147 | -42.69300 | -85.89500 | 10.0000 | 420 | -0.005 |
|------|-----|---|----|---------|-----------|-----------|---------|-----|--------|

|     |      |     |   |    |        |   |       |        |
|-----|------|-----|---|----|--------|---|-------|--------|
| arc | 1988 | 217 | 6 | 31 | 16.220 | P | 0.200 | 0.195  |
| bmd | 1988 | 217 | 6 | 31 | 15.480 | P | 0.200 | 0.045  |
| jhn | 1988 | 217 | 6 | 31 | 16.200 | P | 0.200 | 0.180  |
| pmt | 1988 | 217 | 6 | 31 | 15.990 | P | 0.200 | 0.236  |
| WMD | 1988 | 217 | 6 | 31 | 17.480 | P | 0.200 | 0.129  |
| cou | 1988 | 217 | 6 | 31 | 17.710 | P | 0.200 | -0.028 |
| jun | 1988 | 217 | 6 | 31 | 18.460 | P | 0.200 | -0.353 |
| twr | 1988 | 217 | 6 | 31 | 17.580 | P | 0.200 | -0.094 |
| BLK | 1988 | 217 | 6 | 31 | 9.730  | P | 0.200 | 0.157  |
| BMT | 1988 | 217 | 6 | 31 | 12.200 | P | 0.200 | -0.103 |
| CAL | 1988 | 217 | 6 | 31 | 10.610 | P | 0.200 | -0.407 |
| CLC | 1988 | 217 | 6 | 31 | 13.470 | P | 0.200 | -0.140 |
| DTP | 1988 | 217 | 6 | 31 | 11.470 | P | 0.200 | 0.021  |
| FLS | 1988 | 217 | 6 | 31 | 8.740  | P | 0.200 | -0.062 |
| GSC | 1988 | 217 | 6 | 31 | 10.240 | P | 0.200 | 0.173  |
| HOD | 1988 | 217 | 6 | 31 | 8.170  | P | 0.200 | -0.290 |
| ISA | 1988 | 217 | 6 | 31 | 14.530 | P | 0.200 | 0.071  |
| JAW | 1988 | 217 | 6 | 31 | 11.880 | P | 0.200 | -0.160 |
| JFS | 1988 | 217 | 6 | 31 | 11.790 | P | 0.200 | 0.133  |
| LRM | 1988 | 217 | 6 | 31 | 12.190 | P | 0.200 | -0.001 |
| SBK | 1988 | 217 | 6 | 31 | 10.030 | P | 0.200 | -0.165 |
| SRT | 1988 | 217 | 6 | 31 | 13.400 | P | 0.200 | 0.120  |
| TEJ | 1988 | 217 | 6 | 31 | 13.000 | P | 0.200 | 0.383  |
| TOW | 1988 | 217 | 6 | 31 | 14.080 | P | 0.200 | 0.249  |
| WBM | 1988 | 217 | 6 | 31 | 13.150 | P | 0.200 | 0.040  |
| WBS | 1988 | 217 | 6 | 31 | 13.330 | P | 0.200 | -0.195 |
| WCH | 1988 | 217 | 6 | 31 | 14.990 | P | 0.200 | -0.048 |
| WCS | 1988 | 217 | 6 | 31 | 15.000 | P | 0.200 | 0.056  |
| WCX | 1988 | 217 | 6 | 31 | 12.820 | P | 0.200 | -0.271 |
| WHS | 1988 | 217 | 6 | 31 | 15.390 | P | 0.200 | -0.009 |
| WHV | 1988 | 217 | 6 | 31 | 13.870 | P | 0.200 | 0.159  |
| WJP | 1988 | 217 | 6 | 31 | 13.450 | P | 0.200 | 0.107  |
| WLH | 1988 | 217 | 6 | 31 | 16.800 | P | 0.200 | 0.110  |
| WOF | 1988 | 217 | 6 | 31 | 14.260 | P | 0.200 | -0.043 |
| WRC | 1988 | 217 | 6 | 31 | 14.270 | P | 0.200 | -0.169 |
| WSC | 1988 | 217 | 6 | 31 | 13.350 | P | 0.200 | -0.171 |
| WVP | 1988 | 217 | 6 | 31 | 14.730 | P | 0.200 | -0.043 |
| XMS | 1988 | 217 | 6 | 31 | 12.110 | P | 0.200 | 0.189  |

|      |     |    |    |         |           |           |         |     |        |
|------|-----|----|----|---------|-----------|-----------|---------|-----|--------|
| 1988 | 234 | 13 | 51 | 45.2581 | -42.87700 | -85.83900 | 10.0000 | 429 | -0.008 |
|------|-----|----|----|---------|-----------|-----------|---------|-----|--------|

|     |      |     |    |   |        |   |       |        |
|-----|------|-----|----|---|--------|---|-------|--------|
| arc | 1988 | 234 | 14 | 4 | 15.410 | P | 0.200 | 0.108  |
| bkr | 1988 | 234 | 14 | 4 | 14.990 | P | 0.200 | 0.222  |
| bmd | 1988 | 234 | 14 | 4 | 14.720 | P | 0.200 | 0.005  |
| ccr | 1988 | 234 | 14 | 4 | 18.270 | P | 0.200 | -0.537 |
| jhn | 1988 | 234 | 14 | 4 | 15.400 | P | 0.200 | 0.103  |
| ndl | 1988 | 234 | 14 | 4 | 15.880 | P | 0.200 | -0.046 |
| pmt | 1988 | 234 | 14 | 4 | 15.160 | P | 0.200 | 0.128  |
| WMD | 1988 | 234 | 14 | 4 | 16.610 | P | 0.200 | -0.015 |
| BLK | 1988 | 234 | 14 | 4 | 9.089  | P | 0.200 | 0.223  |
| BMT | 1988 | 234 | 14 | 4 | 11.470 | P | 0.200 | -0.113 |
| CLC | 1988 | 234 | 14 | 4 | 12.690 | P | 0.200 | -0.204 |
| DTP | 1988 | 234 | 14 | 4 | 10.720 | P | 0.200 | -0.014 |
| FLS | 1988 | 234 | 14 | 4 | 8.054  | P | 0.200 | -0.045 |
| GSC | 1988 | 234 | 14 | 4 | 9.569  | P | 0.200 | 0.210  |
| ISA | 1988 | 234 | 14 | 4 | 13.890 | P | 0.200 | 0.152  |
| JAW | 1988 | 234 | 14 | 4 | 11.160 | P | 0.200 | -0.163 |

|     |      |     |    |   |        |   |       |        |
|-----|------|-----|----|---|--------|---|-------|--------|
| LRM | 1988 | 234 | 14 | 4 | 11.400 | P | 0.200 | -0.075 |
| SRT | 1988 | 234 | 14 | 4 | 12.630 | P | 0.200 | 0.066  |
| TOW | 1988 | 234 | 14 | 4 | 13.300 | P | 0.200 | 0.186  |
| WBM | 1988 | 234 | 14 | 4 | 12.400 | P | 0.200 | 0.006  |
| WJP | 1988 | 234 | 14 | 4 | 12.510 | P | 0.200 | -0.116 |
| WSC | 1988 | 234 | 14 | 4 | 12.570 | P | 0.200 | -0.235 |
| XMS | 1988 | 234 | 14 | 4 | 11.360 | P | 0.200 | 0.152  |

|      |     |    |   |         |          |            |         |    |        |
|------|-----|----|---|---------|----------|------------|---------|----|--------|
| 2005 | 236 | 17 | 7 | 47.7261 | 10.07800 | -103.54800 | 10.0000 | 15 | -0.013 |
|------|-----|----|---|---------|----------|------------|---------|----|--------|

|      |      |     |    |    |        |   |       |        |
|------|------|-----|----|----|--------|---|-------|--------|
| HEC  | 2005 | 236 | 17 | 13 | 32.075 | P | 0.200 | -0.191 |
| TUQ  | 2005 | 236 | 17 | 13 | 35.591 | P | 0.200 | -0.049 |
| GSC  | 2005 | 236 | 17 | 13 | 37.536 | P | 0.200 | -0.053 |
| EDW2 | 2005 | 236 | 17 | 13 | 37.942 | P | 0.200 | -0.800 |
| SHO  | 2005 | 236 | 17 | 13 | 40.288 | P | 0.200 | -0.046 |
| LRL  | 2005 | 236 | 17 | 13 | 42.006 | P | 0.200 | -0.132 |
| ARV  | 2005 | 236 | 17 | 13 | 43.341 | P | 0.200 | -0.351 |
| MPP  | 2005 | 236 | 17 | 13 | 45.660 | P | 0.200 | -0.524 |
| MPM  | 2005 | 236 | 17 | 13 | 45.977 | P | 0.200 | -0.051 |
| ISA  | 2005 | 236 | 17 | 13 | 46.400 | P | 0.200 | -0.111 |
| SMM  | 2005 | 236 | 17 | 13 | 49.820 | P | 0.200 | -0.057 |
| V05C | 2005 | 236 | 17 | 13 | 53.986 | P | 0.200 | 0.443  |
| V04C | 2005 | 236 | 17 | 13 | 55.637 | P | 0.200 | -0.256 |
| PKD  | 2005 | 236 | 17 | 13 | 56.400 | P | 0.200 | -0.345 |
| SN11 | 2005 | 236 | 17 | 13 | 56.562 | P | 0.200 | -0.719 |
| TIN  | 2005 | 236 | 17 | 13 | 56.711 | P | 0.200 | 0.603  |
| SN16 | 2005 | 236 | 17 | 13 | 59.020 | P | 0.200 | 0.448  |
| SN22 | 2005 | 236 | 17 | 13 | 59.124 | P | 0.200 | -0.812 |
| SN15 | 2005 | 236 | 17 | 13 | 59.827 | P | 0.200 | 0.405  |
| T06C | 2005 | 236 | 17 | 13 | 59.908 | P | 0.200 | -1.170 |
| S08C | 2005 | 236 | 17 | 14 | 0.074  | P | 0.200 | 0.465  |
| SN23 | 2005 | 236 | 17 | 14 | 0.230  | P | 0.200 | -0.122 |
| SN25 | 2005 | 236 | 17 | 14 | 0.619  | P | 0.200 | 0.284  |
| U04C | 2005 | 236 | 17 | 14 | 0.707  | P | 0.200 | -0.002 |
| SN24 | 2005 | 236 | 17 | 14 | 0.779  | P | 0.200 | 0.081  |
| SN42 | 2005 | 236 | 17 | 14 | 1.501  | P | 0.200 | -1.094 |
| SN36 | 2005 | 236 | 17 | 14 | 2.933  | P | 0.200 | 0.281  |
| SN43 | 2005 | 236 | 17 | 14 | 2.999  | P | 0.200 | -0.624 |
| SN52 | 2005 | 236 | 17 | 14 | 3.003  | P | 0.200 | -1.061 |
| SN44 | 2005 | 236 | 17 | 14 | 3.253  | P | 0.200 | -0.231 |
| SN51 | 2005 | 236 | 17 | 14 | 3.509  | P | 0.200 | -0.845 |
| SN37 | 2005 | 236 | 17 | 14 | 3.651  | P | 0.200 | 0.490  |
| SN53 | 2005 | 236 | 17 | 14 | 4.307  | P | 0.200 | -0.630 |
| SN45 | 2005 | 236 | 17 | 14 | 4.320  | P | 0.200 | 0.128  |
| SN38 | 2005 | 236 | 17 | 14 | 4.689  | P | 0.200 | 0.402  |
| SN47 | 2005 | 236 | 17 | 14 | 5.584  | P | 0.200 | 0.517  |
| SN62 | 2005 | 236 | 17 | 14 | 5.790  | P | 0.200 | -0.826 |
| SN48 | 2005 | 236 | 17 | 14 | 6.443  | P | 0.200 | 0.567  |
| SN63 | 2005 | 236 | 17 | 14 | 6.553  | P | 0.200 | -0.538 |
| PACP | 2005 | 236 | 17 | 14 | 7.056  | P | 0.200 | -0.385 |
| SN56 | 2005 | 236 | 17 | 14 | 7.131  | P | 0.200 | 0.463  |
| R07C | 2005 | 236 | 17 | 14 | 7.621  | P | 0.200 | 0.616  |
| SN57 | 2005 | 236 | 17 | 14 | 7.804  | P | 0.200 | 0.591  |
| SN71 | 2005 | 236 | 17 | 14 | 7.996  | P | 0.200 | -0.498 |
| SN73 | 2005 | 236 | 17 | 14 | 8.233  | P | 0.200 | -0.630 |
| SN74 | 2005 | 236 | 17 | 14 | 9.172  | P | 0.200 | -0.314 |
| SN66 | 2005 | 236 | 17 | 14 | 9.398  | P | 0.200 | 0.537  |
| SN67 | 2005 | 236 | 17 | 14 | 9.543  | P | 0.200 | 0.687  |
| CMB  | 2005 | 236 | 17 | 14 | 11.123 | P | 0.200 | -0.265 |
| SN84 | 2005 | 236 | 17 | 14 | 11.232 | P | 0.200 | -0.263 |
| SN76 | 2005 | 236 | 17 | 14 | 11.279 | P | 0.200 | 0.503  |
| R06C | 2005 | 236 | 17 | 14 | 12.369 | P | 0.200 | 0.615  |
| SN95 | 2005 | 236 | 17 | 14 | 13.084 | P | 0.200 | -0.156 |
| SN86 | 2005 | 236 | 17 | 14 | 13.257 | P | 0.200 | 0.347  |

|      |      |     |    |    |        |   |       |        |
|------|------|-----|----|----|--------|---|-------|--------|
| R04C | 2005 | 236 | 17 | 14 | 15.580 | P | 0.200 | 0.614  |
| R05C | 2005 | 236 | 17 | 14 | 15.789 | P | 0.200 | 0.340  |
| LAVA | 2005 | 236 | 17 | 14 | 18.044 | P | 0.200 | 0.052  |
| P05C | 2005 | 236 | 17 | 14 | 22.202 | P | 0.200 | 0.612  |
| ORV  | 2005 | 236 | 17 | 14 | 27.140 | P | 0.200 | 0.658  |
| O05C | 2005 | 236 | 17 | 14 | 28.418 | P | 0.200 | 0.878  |
| O04C | 2005 | 236 | 17 | 14 | 31.393 | P | 0.200 | 0.636  |
| M06C | 2005 | 236 | 17 | 14 | 35.873 | P | 0.200 | 0.720  |
| M05C | 2005 | 236 | 17 | 14 | 38.792 | P | 0.200 | 0.256  |
| N02C | 2005 | 236 | 17 | 14 | 42.453 | P | 0.200 | 0.017  |
| M04C | 2005 | 236 | 17 | 14 | 43.986 | P | 0.200 | -0.103 |

|      |      |     |    |         |           |            |         |        |        |
|------|------|-----|----|---------|-----------|------------|---------|--------|--------|
| 2005 | 172  | 10  | 43 | 30.2603 | -36.15500 | -100.95900 | 10.0000 | 3      | -0.003 |
| CIA  | 2005 | 172 | 10 | 54      | 48.187    | P          | 0.200   | -0.257 |        |
| BBR  | 2005 | 172 | 10 | 54      | 51.935    | P          | 0.200   | 0.097  |        |
| BFS  | 2005 | 172 | 10 | 54      | 52.371    | P          | 0.200   | -0.161 |        |
| LGU  | 2005 | 172 | 10 | 54      | 53.233    | P          | 0.200   | -0.154 |        |
| DEC  | 2005 | 172 | 10 | 54      | 53.337    | P          | 0.200   | 0.091  |        |
| HEC  | 2005 | 172 | 10 | 54      | 54.378    | P          | 0.200   | -0.021 |        |
| EDW2 | 2005 | 172 | 10 | 54      | 56.142    | P          | 0.200   | -0.443 |        |
| GSC  | 2005 | 172 | 10 | 54      | 57.687    | P          | 0.200   | 0.009  |        |
| ARV  | 2005 | 172 | 10 | 54      | 58.880    | P          | 0.200   | 0.059  |        |
| MPP  | 2005 | 172 | 10 | 54      | 59.136    | P          | 0.200   | 0.117  |        |
| LRL  | 2005 | 172 | 10 | 54      | 59.709    | P          | 0.200   | 0.094  |        |
| SHO  | 2005 | 172 | 10 | 55      | 0.151     | P          | 0.200   | -0.210 |        |
| SMM  | 2005 | 172 | 10 | 55      | 1.841     | P          | 0.200   | 0.277  |        |
| ISA  | 2005 | 172 | 10 | 55      | 1.846     | P          | 0.200   | 0.166  |        |
| MPM  | 2005 | 172 | 10 | 55      | 2.791     | P          | 0.200   | -0.100 |        |
| FUR  | 2005 | 172 | 10 | 55      | 4.326     | P          | 0.200   | 0.176  |        |
| V04C | 2005 | 172 | 10 | 55      | 4.721     | P          | 0.200   | 0.072  |        |
| V05C | 2005 | 172 | 10 | 55      | 5.235     | P          | 0.200   | 0.643  |        |
| RCT  | 2005 | 172 | 10 | 55      | 5.467     | P          | 0.200   | -0.723 |        |
| CWC  | 2005 | 172 | 10 | 55      | 5.835     | P          | 0.200   | 0.164  |        |
| PKD  | 2005 | 172 | 10 | 55      | 5.961     | P          | 0.200   | 0.054  |        |
| SN11 | 2005 | 172 | 10 | 55      | 7.158     | P          | 0.200   | -1.131 |        |
| HELL | 2005 | 172 | 10 | 55      | 7.500     | P          | 0.200   | -0.557 |        |
| U05C | 2005 | 172 | 10 | 55      | 7.592     | P          | 0.200   | 0.231  |        |
| SN21 | 2005 | 172 | 10 | 55      | 8.080     | P          | 0.200   | -1.167 |        |
| TIN  | 2005 | 172 | 10 | 55      | 9.413     | P          | 0.200   | 0.214  |        |
| T06C | 2005 | 172 | 10 | 55      | 9.760     | P          | 0.200   | -0.838 |        |
| HAST | 2005 | 172 | 10 | 55      | 9.935     | P          | 0.200   | 0.280  |        |
| SN42 | 2005 | 172 | 10 | 55      | 11.128    | P          | 0.200   | -0.858 |        |
| SAO  | 2005 | 172 | 10 | 55      | 11.664    | P          | 0.200   | 0.122  |        |
| T05C | 2005 | 172 | 10 | 55      | 11.964    | P          | 0.200   | 0.766  |        |
| SN52 | 2005 | 172 | 10 | 55      | 12.250    | P          | 0.200   | -0.395 |        |
| SN51 | 2005 | 172 | 10 | 55      | 12.606    | P          | 0.200   | 0.092  |        |
| SN26 | 2005 | 172 | 10 | 55      | 12.696    | P          | 0.200   | 0.188  |        |
| PACP | 2005 | 172 | 10 | 55      | 13.089    | P          | 0.200   | 0.343  |        |
| SN28 | 2005 | 172 | 10 | 55      | 14.026    | P          | 0.200   | 0.083  |        |
| SN62 | 2005 | 172 | 10 | 55      | 14.088    | P          | 0.200   | -0.163 |        |
| SN37 | 2005 | 172 | 10 | 55      | 14.122    | P          | 0.200   | 0.195  |        |
| BNLO | 2005 | 172 | 10 | 55      | 14.658    | P          | 0.200   | -0.093 |        |
| SN71 | 2005 | 172 | 10 | 55      | 14.829    | P          | 0.200   | -0.160 |        |
| SN38 | 2005 | 172 | 10 | 55      | 15.202    | P          | 0.200   | 0.252  |        |
| SN47 | 2005 | 172 | 10 | 55      | 15.483    | P          | 0.200   | 0.445  |        |
| S04C | 2005 | 172 | 10 | 55      | 15.913    | P          | 0.200   | 0.521  |        |
| JRSC | 2005 | 172 | 10 | 55      | 16.130    | P          | 0.200   | 0.142  |        |
| SN48 | 2005 | 172 | 10 | 55      | 16.284    | P          | 0.200   | 0.401  |        |
| SN57 | 2005 | 172 | 10 | 55      | 16.757    | P          | 0.200   | 0.475  |        |
| CMB  | 2005 | 172 | 10 | 55      | 17.155    | P          | 0.200   | -0.128 |        |
| SN67 | 2005 | 172 | 10 | 55      | 17.731    | P          | 0.200   | 0.558  |        |
| BDM  | 2005 | 172 | 10 | 55      | 19.209    | P          | 0.200   | 0.601  |        |
| CVS  | 2005 | 172 | 10 | 55      | 21.354    | P          | 0.200   | -0.144 |        |

|      |      |     |    |    |        |   |       |        |
|------|------|-----|----|----|--------|---|-------|--------|
| LAVA | 2005 | 172 | 10 | 55 | 21.451 | P | 0.200 | -0.088 |
| Q04C | 2005 | 172 | 10 | 55 | 23.145 | P | 0.200 | 0.423  |
| P05C | 2005 | 172 | 10 | 55 | 24.537 | P | 0.200 | 0.179  |
| MNRC | 2005 | 172 | 10 | 55 | 24.881 | P | 0.200 | 0.562  |
| SUTB | 2005 | 172 | 10 | 55 | 24.947 | P | 0.200 | -0.360 |
| HOPS | 2005 | 172 | 10 | 55 | 26.177 | P | 0.200 | 0.471  |
| BMN  | 2005 | 172 | 10 | 55 | 26.477 | P | 0.200 | -0.173 |
| ORV  | 2005 | 172 | 10 | 55 | 27.020 | P | 0.200 | 0.409  |
| O05C | 2005 | 172 | 10 | 55 | 28.525 | P | 0.200 | 0.264  |
| O03C | 2005 | 172 | 10 | 55 | 29.172 | P | 0.200 | -0.504 |
| O04C | 2005 | 172 | 10 | 55 | 30.320 | P | 0.200 | -0.001 |
| ELFS | 2005 | 172 | 10 | 55 | 31.673 | P | 0.200 | 0.027  |
| WDC  | 2005 | 172 | 10 | 55 | 32.710 | P | 0.200 | -0.689 |
| HATC | 2005 | 172 | 10 | 55 | 33.323 | P | 0.200 | -0.090 |
| JCC  | 2005 | 172 | 10 | 55 | 36.700 | P | 0.200 | 0.144  |
| YBH  | 2005 | 172 | 10 | 55 | 38.914 | P | 0.200 | -0.743 |
| HUMO | 2005 | 172 | 10 | 55 | 44.261 | P | 0.200 | -0.059 |

|      |     |   |    |         |           |           |         |   |       |
|------|-----|---|----|---------|-----------|-----------|---------|---|-------|
| 2005 | 191 | 4 | 46 | 32.3554 | -36.31000 | -97.26400 | 10.0000 | 6 | 0.002 |
|------|-----|---|----|---------|-----------|-----------|---------|---|-------|

|      |      |     |   |    |        |   |       |        |
|------|------|-----|---|----|--------|---|-------|--------|
| CIA  | 2005 | 191 | 4 | 57 | 56.367 | P | 0.200 | -0.314 |
| SVD  | 2005 | 191 | 4 | 57 | 58.800 | P | 0.200 | 0.019  |
| BBR  | 2005 | 191 | 4 | 57 | 59.838 | P | 0.200 | 0.240  |
| BFS  | 2005 | 191 | 4 | 58 | 0.198  | P | 0.200 | -0.281 |
| PAS  | 2005 | 191 | 4 | 58 | 0.382  | P | 0.200 | -0.125 |
| DJJ  | 2005 | 191 | 4 | 58 | 0.665  | P | 0.200 | -0.170 |
| MWC  | 2005 | 191 | 4 | 58 | 0.741  | P | 0.200 | -0.242 |
| VTV  | 2005 | 191 | 4 | 58 | 1.251  | P | 0.200 | -0.540 |
| CHF  | 2005 | 191 | 4 | 58 | 1.264  | P | 0.200 | -0.211 |
| DEC  | 2005 | 191 | 4 | 58 | 1.315  | P | 0.200 | -0.034 |
| LGU  | 2005 | 191 | 4 | 58 | 1.398  | P | 0.200 | -0.266 |
| HEC  | 2005 | 191 | 4 | 58 | 2.064  | P | 0.200 | 0.106  |
| VCS  | 2005 | 191 | 4 | 58 | 2.144  | P | 0.200 | -0.408 |
| OSI  | 2005 | 191 | 4 | 58 | 3.968  | P | 0.200 | -0.079 |
| EDW2 | 2005 | 191 | 4 | 58 | 4.047  | P | 0.200 | -0.461 |
| TUQ  | 2005 | 191 | 4 | 58 | 5.010  | P | 0.200 | 0.196  |
| GSC  | 2005 | 191 | 4 | 58 | 5.362  | P | 0.200 | 0.084  |
| ARV  | 2005 | 191 | 4 | 58 | 7.131  | P | 0.200 | 0.237  |
| LRL  | 2005 | 191 | 4 | 58 | 7.354  | P | 0.200 | -0.023 |
| SHO  | 2005 | 191 | 4 | 58 | 7.722  | P | 0.200 | -0.017 |
| ISA  | 2005 | 191 | 4 | 58 | 9.687  | P | 0.200 | 0.095  |
| MPM  | 2005 | 191 | 4 | 58 | 10.359 | P | 0.200 | -0.163 |
| VES  | 2005 | 191 | 4 | 58 | 11.149 | P | 0.200 | -0.219 |
| FUR  | 2005 | 191 | 4 | 58 | 11.598 | P | 0.200 | 0.012  |
| V04C | 2005 | 191 | 4 | 58 | 13.123 | P | 0.200 | 0.046  |
| V05C | 2005 | 191 | 4 | 58 | 13.298 | P | 0.200 | 0.512  |
| RCT  | 2005 | 191 | 4 | 58 | 13.373 | P | 0.200 | -0.796 |
| CWC  | 2005 | 191 | 4 | 58 | 13.474 | P | 0.200 | 0.105  |
| PKD  | 2005 | 191 | 4 | 58 | 14.044 | P | 0.200 | -0.171 |
| SN11 | 2005 | 191 | 4 | 58 | 15.067 | P | 0.200 | -1.151 |
| HELL | 2005 | 191 | 4 | 58 | 15.402 | P | 0.200 | -0.520 |
| GRA  | 2005 | 191 | 4 | 58 | 15.724 | P | 0.200 | 0.408  |
| U05C | 2005 | 191 | 4 | 58 | 15.775 | P | 0.200 | 0.253  |
| T06C | 2005 | 191 | 4 | 58 | 17.702 | P | 0.200 | -0.853 |
| SN23 | 2005 | 191 | 4 | 58 | 18.028 | P | 0.200 | -0.740 |
| HAST | 2005 | 191 | 4 | 58 | 18.248 | P | 0.200 | 0.153  |
| SN42 | 2005 | 191 | 4 | 58 | 19.106 | P | 0.200 | -0.782 |
| SN26 | 2005 | 191 | 4 | 58 | 19.852 | P | 0.200 | -0.275 |
| SAO  | 2005 | 191 | 4 | 58 | 20.143 | P | 0.200 | 0.242  |
| SN52 | 2005 | 191 | 4 | 58 | 20.161 | P | 0.200 | -0.412 |
| SN51 | 2005 | 191 | 4 | 58 | 20.380 | P | 0.200 | -0.128 |
| SN53 | 2005 | 191 | 4 | 58 | 21.231 | P | 0.200 | -0.160 |
| PACP | 2005 | 191 | 4 | 58 | 21.396 | P | 0.200 | 0.375  |
| S05C | 2005 | 191 | 4 | 58 | 21.423 | P | 0.200 | 0.147  |

|      |      |     |   |    |        |   |       |        |
|------|------|-----|---|----|--------|---|-------|--------|
| TPH  | 2005 | 191 | 4 | 58 | 21.429 | P | 0.200 | 0.356  |
| SN28 | 2005 | 191 | 4 | 58 | 21.566 | P | 0.200 | 0.116  |
| SN37 | 2005 | 191 | 4 | 58 | 21.803 | P | 0.200 | 0.293  |
| SN62 | 2005 | 191 | 4 | 58 | 22.098 | P | 0.200 | -0.075 |
| SN38 | 2005 | 191 | 4 | 58 | 22.810 | P | 0.200 | 0.342  |
| SN47 | 2005 | 191 | 4 | 58 | 22.978 | P | 0.200 | 0.343  |
| SN71 | 2005 | 191 | 4 | 58 | 23.010 | P | 0.200 | 0.020  |
| BNLO | 2005 | 191 | 4 | 58 | 23.116 | P | 0.200 | -0.067 |
| SN48 | 2005 | 191 | 4 | 58 | 23.766 | P | 0.200 | 0.347  |
| S04C | 2005 | 191 | 4 | 58 | 24.046 | P | 0.200 | 0.452  |
| SN57 | 2005 | 191 | 4 | 58 | 24.274 | P | 0.200 | 0.358  |
| JRSC | 2005 | 191 | 4 | 58 | 24.705 | P | 0.200 | 0.318  |
| CMB  | 2005 | 191 | 4 | 58 | 25.220 | P | 0.200 | -0.005 |
| SN67 | 2005 | 191 | 4 | 58 | 25.264 | P | 0.200 | 0.436  |
| WENL | 2005 | 191 | 4 | 58 | 25.663 | P | 0.200 | 0.880  |
| FARB | 2005 | 191 | 4 | 58 | 27.238 | P | 0.200 | -0.051 |
| R04C | 2005 | 191 | 4 | 58 | 27.287 | P | 0.200 | 0.332  |
| LAVA | 2005 | 191 | 4 | 58 | 29.370 | P | 0.200 | -0.052 |
| CVS  | 2005 | 191 | 4 | 58 | 29.860 | P | 0.200 | 0.088  |
| Q04C | 2005 | 191 | 4 | 58 | 30.970 | P | 0.200 | 0.267  |
| Q03C | 2005 | 191 | 4 | 58 | 31.537 | P | 0.200 | 0.922  |
| P05C | 2005 | 191 | 4 | 58 | 32.494 | P | 0.200 | 0.361  |
| SUTB | 2005 | 191 | 4 | 58 | 32.884 | P | 0.200 | -0.435 |
| BMN  | 2005 | 191 | 4 | 58 | 33.424 | P | 0.200 | -0.188 |
| HOPS | 2005 | 191 | 4 | 58 | 34.585 | P | 0.200 | 0.600  |
| ORV  | 2005 | 191 | 4 | 58 | 34.952 | P | 0.200 | 0.435  |
| O05C | 2005 | 191 | 4 | 58 | 36.237 | P | 0.200 | 0.245  |
| O04C | 2005 | 191 | 4 | 58 | 37.806 | P | 0.200 | -0.221 |
| WDC  | 2005 | 191 | 4 | 58 | 40.610 | P | 0.200 | -0.712 |
| HATC | 2005 | 191 | 4 | 58 | 40.997 | P | 0.200 | -0.110 |
| M06C | 2005 | 191 | 4 | 58 | 41.858 | P | 0.200 | 0.164  |
| JCC  | 2005 | 191 | 4 | 58 | 45.062 | P | 0.200 | 0.383  |
| HUMO | 2005 | 191 | 4 | 58 | 52.151 | P | 0.200 | 0.167  |

|      |    |    |    |        |           |            |         |     |       |
|------|----|----|----|--------|-----------|------------|---------|-----|-------|
| 2006 | 18 | 23 | 43 | 7.2156 | -36.41100 | -100.49600 | 10.0000 | 105 | 0.004 |
|------|----|----|----|--------|-----------|------------|---------|-----|-------|

|      |      |    |    |    |        |   |       |        |
|------|------|----|----|----|--------|---|-------|--------|
| CIA  | 2006 | 18 | 23 | 54 | 27.139 | P | 0.200 | -0.355 |
| BFS  | 2006 | 18 | 23 | 54 | 31.230 | P | 0.200 | -0.304 |
| LGU  | 2006 | 18 | 23 | 54 | 32.125 | P | 0.200 | -0.299 |
| DEC  | 2006 | 18 | 23 | 54 | 32.410 | P | 0.200 | 0.146  |
| HEC  | 2006 | 18 | 23 | 54 | 33.240 | P | 0.200 | -0.120 |
| OSI  | 2006 | 18 | 23 | 54 | 34.728 | P | 0.200 | -0.211 |
| EDW2 | 2006 | 18 | 23 | 54 | 35.187 | P | 0.200 | -0.390 |
| TUQ  | 2006 | 18 | 23 | 54 | 36.388 | P | 0.200 | 0.010  |
| GSC  | 2006 | 18 | 23 | 54 | 36.544 | P | 0.200 | -0.091 |
| ARV  | 2006 | 18 | 23 | 54 | 37.933 | P | 0.200 | 0.110  |
| MPP  | 2006 | 18 | 23 | 54 | 38.017 | P | 0.200 | -0.030 |
| SHO  | 2006 | 18 | 23 | 54 | 39.178 | P | 0.200 | -0.106 |
| ISA  | 2006 | 18 | 23 | 54 | 40.775 | P | 0.200 | 0.121  |
| SMM  | 2006 | 18 | 23 | 54 | 40.811 | P | 0.200 | 0.232  |
| MPM  | 2006 | 18 | 23 | 54 | 41.638 | P | 0.200 | -0.196 |
| VES  | 2006 | 18 | 23 | 54 | 42.039 | P | 0.200 | -0.290 |
| FUR  | 2006 | 18 | 23 | 54 | 43.196 | P | 0.200 | 0.126  |
| V05C | 2006 | 18 | 23 | 54 | 44.134 | P | 0.200 | 0.543  |
| RCT  | 2006 | 18 | 23 | 54 | 44.240 | P | 0.200 | -0.922 |
| PKD  | 2006 | 18 | 23 | 54 | 44.868 | P | 0.200 | -0.045 |
| HELL | 2006 | 18 | 23 | 54 | 46.406 | P | 0.200 | -0.606 |
| SN21 | 2006 | 18 | 23 | 54 | 46.891 | P | 0.200 | -1.313 |
| GRA  | 2006 | 18 | 23 | 54 | 47.033 | P | 0.200 | 0.277  |
| U04C | 2006 | 18 | 23 | 54 | 48.055 | P | 0.200 | 0.652  |
| SN22 | 2006 | 18 | 23 | 54 | 48.205 | P | 0.200 | -1.098 |
| TIN  | 2006 | 18 | 23 | 54 | 48.342 | P | 0.200 | 0.216  |
| T06C | 2006 | 18 | 23 | 54 | 48.668 | P | 0.200 | -0.888 |
| HAST | 2006 | 18 | 23 | 54 | 48.844 | P | 0.200 | 0.180  |

|      |      |    |    |    |        |   |       |        |
|------|------|----|----|----|--------|---|-------|--------|
| SN23 | 2006 | 18 | 23 | 54 | 49.250 | P | 0.200 | -0.626 |
| SN15 | 2006 | 18 | 23 | 54 | 50.019 | P | 0.200 | -0.097 |
| PACP | 2006 | 18 | 23 | 54 | 50.473 | P | 0.200 | -1.255 |
| SN25 | 2006 | 18 | 23 | 54 | 50.543 | P | 0.200 | -0.052 |
| SN34 | 2006 | 18 | 23 | 54 | 50.644 | P | 0.200 | -0.532 |
| SAO  | 2006 | 18 | 23 | 54 | 50.657 | P | 0.200 | 0.118  |
| T05C | 2006 | 18 | 23 | 54 | 50.892 | P | 0.200 | 0.717  |
| S08C | 2006 | 18 | 23 | 54 | 51.047 | P | 0.200 | 0.285  |
| SN52 | 2006 | 18 | 23 | 54 | 51.199 | P | 0.200 | -0.393 |
| SN51 | 2006 | 18 | 23 | 54 | 51.512 | P | 0.200 | 0.044  |
| SN44 | 2006 | 18 | 23 | 54 | 51.558 | P | 0.200 | -0.456 |
| SN26 | 2006 | 18 | 23 | 54 | 51.563 | P | 0.200 | 0.139  |
| S05C | 2006 | 18 | 23 | 54 | 52.317 | P | 0.200 | 0.112  |
| SN36 | 2006 | 18 | 23 | 54 | 52.363 | P | 0.200 | 0.007  |
| TPH  | 2006 | 18 | 23 | 54 | 52.884 | P | 0.200 | 0.217  |
| SN62 | 2006 | 18 | 23 | 54 | 53.032 | P | 0.200 | -0.158 |
| SN37 | 2006 | 18 | 23 | 54 | 53.032 | P | 0.200 | 0.198  |
| SN54 | 2006 | 18 | 23 | 54 | 53.733 | P | 0.200 | 0.189  |
| SN71 | 2006 | 18 | 23 | 54 | 53.828 | P | 0.200 | -0.109 |
| SN38 | 2006 | 18 | 23 | 54 | 54.102 | P | 0.200 | 0.256  |
| SN55 | 2006 | 18 | 23 | 54 | 54.354 | P | 0.200 | 0.098  |
| SN47 | 2006 | 18 | 23 | 54 | 54.392 | P | 0.200 | 0.448  |
| SN73 | 2006 | 18 | 23 | 54 | 54.698 | P | 0.200 | 0.010  |
| S04C | 2006 | 18 | 23 | 54 | 54.731 | P | 0.200 | 0.374  |
| S06C | 2006 | 18 | 23 | 54 | 54.842 | P | 0.200 | 0.135  |
| SN48 | 2006 | 18 | 23 | 54 | 55.133 | P | 0.200 | 0.356  |
| R07C | 2006 | 18 | 23 | 54 | 55.360 | P | 0.200 | 0.451  |
| MNV  | 2006 | 18 | 23 | 54 | 55.870 | P | 0.200 | 0.160  |
| CMB  | 2006 | 18 | 23 | 54 | 56.190 | P | 0.200 | -0.024 |
| SN76 | 2006 | 18 | 23 | 54 | 57.250 | P | 0.200 | 0.212  |
| BDM  | 2006 | 18 | 23 | 54 | 58.271 | P | 0.200 | 0.702  |
| R06C | 2006 | 18 | 23 | 54 | 58.299 | P | 0.200 | 0.523  |
| R04C | 2006 | 18 | 23 | 54 | 58.338 | P | 0.200 | 0.463  |
| R05C | 2006 | 18 | 23 | 54 | 59.871 | P | 0.200 | 0.179  |
| LAVA | 2006 | 18 | 23 | 55 | 0.418  | P | 0.200 | -0.040 |
| Q04C | 2006 | 18 | 23 | 55 | 1.969  | P | 0.200 | 0.324  |
| P05C | 2006 | 18 | 23 | 55 | 3.534  | P | 0.200 | 0.287  |
| SUTB | 2006 | 18 | 23 | 55 | 4.065  | P | 0.200 | -0.151 |
| BMN  | 2006 | 18 | 23 | 55 | 5.330  | P | 0.200 | -0.117 |
| ORV  | 2006 | 18 | 23 | 55 | 5.922  | P | 0.200 | 0.415  |
| BEK  | 2006 | 18 | 23 | 55 | 6.232  | P | 0.200 | 0.224  |
| O05C | 2006 | 18 | 23 | 55 | 7.455  | P | 0.200 | 0.308  |
| O04C | 2006 | 18 | 23 | 55 | 9.191  | P | 0.200 | 0.002  |
| O02C | 2006 | 18 | 23 | 55 | 11.171 | P | 0.200 | 0.584  |
| WDC  | 2006 | 18 | 23 | 55 | 11.642 | P | 0.200 | -0.637 |
| HATC | 2006 | 18 | 23 | 55 | 12.282 | P | 0.200 | 0.016  |
| M06C | 2006 | 18 | 23 | 55 | 13.400 | P | 0.200 | 0.337  |
| M05C | 2006 | 18 | 23 | 55 | 14.673 | P | 0.200 | 0.012  |
| N02C | 2006 | 18 | 23 | 55 | 14.967 | P | 0.200 | 0.270  |
| M02C | 2006 | 18 | 23 | 55 | 17.156 | P | 0.200 | 0.178  |
| M04C | 2006 | 18 | 23 | 55 | 17.766 | P | 0.200 | -0.048 |

|      |      |     |    |         |         |           |         |        |        |
|------|------|-----|----|---------|---------|-----------|---------|--------|--------|
| 2006 | 121  | 20  | 13 | 29.8753 | 2.20500 | -99.03500 | 10.0000 | 125    | -0.013 |
| HEC  | 2006 | 121 | 20 | 20      | 33.159  | P         | 0.200   | 0.054  |        |
| BFS  | 2006 | 121 | 20 | 20      | 33.532  | P         | 0.200   | -0.187 |        |
| DJJ  | 2006 | 121 | 20 | 20      | 35.656  | P         | 0.200   | -0.100 |        |
| TUQ  | 2006 | 121 | 20 | 20      | 36.191  | P         | 0.200   | 0.042  |        |
| DEC  | 2006 | 121 | 20 | 20      | 36.227  | P         | 0.200   | -0.024 |        |
| LGU  | 2006 | 121 | 20 | 20      | 38.091  | P         | 0.200   | -0.002 |        |
| GSC  | 2006 | 121 | 20 | 20      | 38.286  | P         | 0.200   | 0.089  |        |
| EDW2 | 2006 | 121 | 20 | 20      | 39.004  | P         | 0.200   | -0.509 |        |
| SHO  | 2006 | 121 | 20 | 20      | 40.663  | P         | 0.200   | 0.043  |        |
| LRL  | 2006 | 121 | 20 | 20      | 42.753  | P         | 0.200   | 0.110  |        |

|      |      |     |    |    |        |   |       |        |
|------|------|-----|----|----|--------|---|-------|--------|
| ARV  | 2006 | 121 | 20 | 20 | 44.363 | P | 0.200 | 0.093  |
| MPM  | 2006 | 121 | 20 | 20 | 46.241 | P | 0.200 | -0.013 |
| MPP  | 2006 | 121 | 20 | 20 | 46.393 | P | 0.200 | -0.334 |
| ISA  | 2006 | 121 | 20 | 20 | 46.961 | P | 0.200 | 0.075  |
| FUR  | 2006 | 121 | 20 | 20 | 46.964 | P | 0.200 | 0.209  |
| TPNV | 2006 | 121 | 20 | 20 | 48.837 | P | 0.200 | 0.463  |
| VES  | 2006 | 121 | 20 | 20 | 50.295 | P | 0.200 | -0.023 |
| SMM  | 2006 | 121 | 20 | 20 | 50.347 | P | 0.200 | 0.133  |
| CWC  | 2006 | 121 | 20 | 20 | 51.324 | P | 0.200 | 0.350  |
| GRA  | 2006 | 121 | 20 | 20 | 52.913 | P | 0.200 | 0.522  |
| V05C | 2006 | 121 | 20 | 20 | 54.189 | P | 0.200 | 0.529  |
| HELL | 2006 | 121 | 20 | 20 | 56.109 | P | 0.200 | 0.083  |
| TIN  | 2006 | 121 | 20 | 20 | 56.240 | P | 0.200 | 0.440  |
| SN11 | 2006 | 121 | 20 | 20 | 56.248 | P | 0.200 | -0.815 |
| PKD  | 2006 | 121 | 20 | 20 | 56.462 | P | 0.200 | -0.263 |
| V04C | 2006 | 121 | 20 | 20 | 57.067 | P | 0.200 | 1.126  |
| S09A | 2006 | 121 | 20 | 20 | 57.330 | P | 0.200 | 0.082  |
| SN21 | 2006 | 121 | 20 | 20 | 57.430 | P | 0.200 | -1.194 |
| SN16 | 2006 | 121 | 20 | 20 | 58.290 | P | 0.200 | 0.186  |
| SN22 | 2006 | 121 | 20 | 20 | 58.649 | P | 0.200 | -0.923 |
| SN15 | 2006 | 121 | 20 | 20 | 59.171 | P | 0.200 | 0.193  |
| S08C | 2006 | 121 | 20 | 20 | 59.366 | P | 0.200 | 0.307  |
| T06C | 2006 | 121 | 20 | 20 | 59.447 | P | 0.200 | -1.229 |
| SN23 | 2006 | 121 | 20 | 20 | 59.561 | P | 0.200 | -0.385 |
| TPH  | 2006 | 121 | 20 | 20 | 59.971 | P | 0.200 | 0.179  |
| SN25 | 2006 | 121 | 20 | 21 | 0.014  | P | 0.200 | 0.178  |
| V03C | 2006 | 121 | 20 | 21 | 0.175  | P | 0.200 | 0.219  |
| U04C | 2006 | 121 | 20 | 21 | 0.491  | P | 0.200 | 0.054  |
| SN26 | 2006 | 121 | 20 | 21 | 0.867  | P | 0.200 | 0.337  |
| SN28 | 2006 | 121 | 20 | 21 | 2.106  | P | 0.200 | 0.411  |
| SN52 | 2006 | 121 | 20 | 21 | 2.161  | P | 0.200 | -1.318 |
| SN37 | 2006 | 121 | 20 | 21 | 2.655  | P | 0.200 | 0.229  |
| SN51 | 2006 | 121 | 20 | 21 | 2.883  | P | 0.200 | -0.902 |
| HAST | 2006 | 121 | 20 | 21 | 3.691  | P | 0.200 | -0.015 |
| SN38 | 2006 | 121 | 20 | 21 | 3.719  | P | 0.200 | 0.293  |
| SN47 | 2006 | 121 | 20 | 21 | 4.439  | P | 0.200 | 0.214  |
| S05C | 2006 | 121 | 20 | 21 | 4.625  | P | 0.200 | -0.686 |
| SN62 | 2006 | 121 | 20 | 21 | 4.899  | P | 0.200 | -0.980 |
| R08A | 2006 | 121 | 20 | 21 | 4.971  | P | 0.200 | 0.255  |
| SN48 | 2006 | 121 | 20 | 21 | 5.200  | P | 0.200 | 0.255  |
| Q09A | 2006 | 121 | 20 | 21 | 5.654  | P | 0.200 | 0.413  |
| R07C | 2006 | 121 | 20 | 21 | 6.449  | P | 0.200 | 0.360  |
| PACP | 2006 | 121 | 20 | 21 | 6.601  | P | 0.200 | -0.195 |
| SN57 | 2006 | 121 | 20 | 21 | 6.755  | P | 0.200 | 0.476  |
| S06C | 2006 | 121 | 20 | 21 | 6.916  | P | 0.200 | -0.500 |
| SN71 | 2006 | 121 | 20 | 21 | 7.076  | P | 0.200 | -0.611 |
| SN73 | 2006 | 121 | 20 | 21 | 7.307  | P | 0.200 | -0.695 |
| Q08A | 2006 | 121 | 20 | 21 | 8.016  | P | 0.200 | 0.298  |
| SN67 | 2006 | 121 | 20 | 21 | 8.306  | P | 0.200 | 0.475  |
| SN76 | 2006 | 121 | 20 | 21 | 10.021 | P | 0.200 | 0.324  |
| S04C | 2006 | 121 | 20 | 21 | 10.245 | P | 0.200 | 0.085  |
| P09A | 2006 | 121 | 20 | 21 | 10.334 | P | 0.200 | -0.013 |
| SN85 | 2006 | 121 | 20 | 21 | 10.677 | P | 0.200 | -0.067 |
| MHC  | 2006 | 121 | 20 | 21 | 10.755 | P | 0.200 | 0.308  |
| R06C | 2006 | 121 | 20 | 21 | 10.926 | P | 0.200 | 0.341  |
| P08A | 2006 | 121 | 20 | 21 | 14.203 | P | 0.200 | 0.110  |
| R04C | 2006 | 121 | 20 | 21 | 14.414 | P | 0.200 | 0.633  |
| O09A | 2006 | 121 | 20 | 21 | 14.915 | P | 0.200 | 0.009  |
| BDM  | 2006 | 121 | 20 | 21 | 15.836 | P | 0.200 | 0.540  |
| P07A | 2006 | 121 | 20 | 21 | 16.182 | P | 0.200 | 0.556  |
| LAVA | 2006 | 121 | 20 | 21 | 16.539 | P | 0.200 | -0.029 |
| BMN  | 2006 | 121 | 20 | 21 | 16.601 | P | 0.200 | -0.188 |
| WCN  | 2006 | 121 | 20 | 21 | 17.486 | P | 0.200 | 0.420  |

|      |      |     |    |    |        |   |       |        |
|------|------|-----|----|----|--------|---|-------|--------|
| O08A | 2006 | 121 | 20 | 21 | 18.535 | P | 0.200 | -0.257 |
| CVS  | 2006 | 121 | 20 | 21 | 19.774 | P | 0.200 | -0.296 |
| O07A | 2006 | 121 | 20 | 21 | 19.820 | P | 0.200 | -0.142 |
| Q04C | 2006 | 121 | 20 | 21 | 19.844 | P | 0.200 | 0.506  |
| P05C | 2006 | 121 | 20 | 21 | 20.258 | P | 0.200 | 0.396  |
| Q03C | 2006 | 121 | 20 | 21 | 21.308 | P | 0.200 | 0.953  |
| N08A | 2006 | 121 | 20 | 21 | 21.917 | P | 0.200 | -0.212 |
| BEK  | 2006 | 121 | 20 | 21 | 23.164 | P | 0.200 | 0.290  |
| SUTB | 2006 | 121 | 20 | 21 | 23.285 | P | 0.200 | -0.078 |
| O06A | 2006 | 121 | 20 | 21 | 23.404 | P | 0.200 | 0.322  |
| MNRC | 2006 | 121 | 20 | 21 | 24.073 | P | 0.200 | 0.525  |
| ORV  | 2006 | 121 | 20 | 21 | 24.891 | P | 0.200 | 0.401  |
| O05C | 2006 | 121 | 20 | 21 | 25.913 | P | 0.200 | 0.514  |
| O04C | 2006 | 121 | 20 | 21 | 28.762 | P | 0.200 | 0.363  |
| M07A | 2006 | 121 | 20 | 21 | 29.390 | P | 0.200 | -0.122 |
| ELFS | 2006 | 121 | 20 | 21 | 29.784 | P | 0.200 | 0.486  |
| P01C | 2006 | 121 | 20 | 21 | 31.362 | P | 0.200 | 0.540  |
| M06C | 2006 | 121 | 20 | 21 | 32.664 | P | 0.200 | 0.345  |
| M05C | 2006 | 121 | 20 | 21 | 35.383 | P | 0.200 | -0.173 |
| M03C | 2006 | 121 | 20 | 21 | 37.110 | P | 0.200 | -1.138 |
| N02C | 2006 | 121 | 20 | 21 | 39.251 | P | 0.200 | -0.227 |
| M04C | 2006 | 121 | 20 | 21 | 40.196 | P | 0.200 | -0.588 |
| M02C | 2006 | 121 | 20 | 21 | 40.630 | P | 0.200 | -0.956 |
| YBH  | 2006 | 121 | 20 | 21 | 41.716 | P | 0.200 | -1.588 |
| L02A | 2006 | 121 | 20 | 21 | 48.748 | P | 0.200 | -0.214 |
| DBO  | 2006 | 121 | 20 | 21 | 53.576 | P | 0.200 | -0.425 |
| J02A | 2006 | 121 | 20 | 21 | 56.646 | P | 0.200 | 0.069  |
| I03A | 2006 | 121 | 20 | 21 | 59.362 | P | 0.200 | -0.198 |

|      |      |     |    |         |           |            |         |        |       |
|------|------|-----|----|---------|-----------|------------|---------|--------|-------|
| 2006 | 349  | 23  | 57 | 11.5582 | -35.32700 | -105.74500 | 10.0000 | 251    | 0.004 |
| DJJ  | 2006 | 350 | 0  | 8       | 23.440    | P          | 0.200   | -0.228 |       |
| BFS  | 2006 | 350 | 0  | 8       | 23.543    | P          | 0.200   | -0.246 |       |
| LGU  | 2006 | 350 | 0  | 8       | 23.855    | P          | 0.200   | -0.351 |       |
| MWC  | 2006 | 350 | 0  | 8       | 24.019    | P          | 0.200   | -0.084 |       |
| DEC  | 2006 | 350 | 0  | 8       | 24.258    | P          | 0.200   | -0.045 |       |
| CHF  | 2006 | 350 | 0  | 8       | 24.698    | P          | 0.200   | 0.063  |       |
| VCS  | 2006 | 350 | 0  | 8       | 25.434    | P          | 0.200   | -0.262 |       |
| HEC  | 2006 | 350 | 0  | 8       | 26.172    | P          | 0.200   | -0.007 |       |
| OSI  | 2006 | 350 | 0  | 8       | 26.391    | P          | 0.200   | -0.553 |       |
| EDW2 | 2006 | 350 | 0  | 8       | 27.494    | P          | 0.200   | -0.380 |       |
| GSC  | 2006 | 350 | 0  | 8       | 29.378    | P          | 0.200   | -0.024 |       |
| MPP  | 2006 | 350 | 0  | 8       | 29.510    | P          | 0.200   | -0.276 |       |
| TUQ  | 2006 | 350 | 0  | 8       | 29.538    | P          | 0.200   | 0.054  |       |
| ARV  | 2006 | 350 | 0  | 8       | 29.888    | P          | 0.200   | -0.036 |       |
| LRL  | 2006 | 350 | 0  | 8       | 31.174    | P          | 0.200   | 0.049  |       |
| V11A | 2006 | 350 | 0  | 8       | 31.531    | P          | 0.200   | 0.113  |       |
| SHO  | 2006 | 350 | 0  | 8       | 32.265    | P          | 0.200   | -0.121 |       |
| SMM  | 2006 | 350 | 0  | 8       | 32.357    | P          | 0.200   | -0.013 |       |
| ISA  | 2006 | 350 | 0  | 8       | 33.118    | P          | 0.200   | 0.126  |       |
| SLA  | 2006 | 350 | 0  | 8       | 33.269    | P          | 0.200   | -0.004 |       |
| VES  | 2006 | 350 | 0  | 8       | 34.190    | P          | 0.200   | -0.322 |       |
| MPM  | 2006 | 350 | 0  | 8       | 34.428    | P          | 0.200   | -0.139 |       |
| U11A | 2006 | 350 | 0  | 8       | 35.019    | P          | 0.200   | 0.064  |       |
| FUR  | 2006 | 350 | 0  | 8       | 36.274    | P          | 0.200   | 0.179  |       |
| PKD  | 2006 | 350 | 0  | 8       | 36.415    | P          | 0.200   | -0.274 |       |
| RCT  | 2006 | 350 | 0  | 8       | 36.457    | P          | 0.200   | -0.950 |       |
| HELL | 2006 | 350 | 0  | 8       | 38.729    | P          | 0.200   | -0.707 |       |
| GRA  | 2006 | 350 | 0  | 8       | 40.025    | P          | 0.200   | 0.284  |       |
| HAST | 2006 | 350 | 0  | 8       | 40.119    | P          | 0.200   | -0.149 |       |
| T06C | 2006 | 350 | 0  | 8       | 40.921    | P          | 0.200   | -0.936 |       |
| TIN  | 2006 | 350 | 0  | 8       | 41.089    | P          | 0.200   | 0.211  |       |
| T05C | 2006 | 350 | 0  | 8       | 42.743    | P          | 0.200   | 0.574  |       |
| SN43 | 2006 | 350 | 0  | 8       | 43.894    | P          | 0.200   | -0.375 |       |



|      |      |     |   |   |        |   |       |        |
|------|------|-----|---|---|--------|---|-------|--------|
| PACP | 2006 | 350 | 0 | 8 | 43.632 | P | 0.200 | 0.055  |
| S08C | 2006 | 350 | 0 | 8 | 43.964 | P | 0.200 | 0.345  |
| S09A | 2006 | 350 | 0 | 8 | 44.140 | P | 0.200 | 0.236  |
| MLAC | 2006 | 350 | 0 | 8 | 44.848 | P | 0.200 | 0.047  |
| MHC  | 2006 | 350 | 0 | 8 | 46.115 | P | 0.200 | 0.175  |
| S04C | 2006 | 350 | 0 | 8 | 46.657 | P | 0.200 | 0.327  |
| R10A | 2006 | 350 | 0 | 8 | 46.858 | P | 0.200 | 0.332  |
| R09A | 2006 | 350 | 0 | 8 | 46.993 | P | 0.200 | 0.131  |
| S06C | 2006 | 350 | 0 | 8 | 47.220 | P | 0.200 | 0.045  |
| CMB  | 2006 | 350 | 0 | 8 | 48.407 | P | 0.200 | -0.153 |
| R08A | 2006 | 350 | 0 | 8 | 48.441 | P | 0.200 | 0.068  |
| SN93 | 2006 | 350 | 0 | 8 | 49.591 | P | 0.200 | 0.352  |
| Q11A | 2006 | 350 | 0 | 8 | 49.666 | P | 0.200 | 0.390  |
| SNA3 | 2006 | 350 | 0 | 8 | 51.042 | P | 0.200 | 0.217  |
| Q09A | 2006 | 350 | 0 | 8 | 50.779 | P | 0.200 | 0.464  |
| SNB3 | 2006 | 350 | 0 | 8 | 51.933 | P | 0.200 | -0.052 |
| SN96 | 2006 | 350 | 0 | 8 | 50.972 | P | 0.200 | 0.115  |
| R06C | 2006 | 350 | 0 | 8 | 50.994 | P | 0.200 | 0.483  |
| Q08A | 2006 | 350 | 0 | 8 | 51.065 | P | 0.200 | 0.055  |
| SN97 | 2006 | 350 | 0 | 8 | 52.886 | P | 0.200 | 0.401  |
| SNB5 | 2006 | 350 | 0 | 8 | 53.074 | P | 0.200 | -0.257 |
| R05C | 2006 | 350 | 0 | 8 | 52.338 | P | 0.200 | 0.052  |
| SNC4 | 2006 | 350 | 0 | 8 | 53.349 | P | 0.200 | -0.116 |
| LAVA | 2006 | 350 | 0 | 8 | 52.770 | P | 0.200 | -0.120 |
| Q07A | 2006 | 350 | 0 | 8 | 52.831 | P | 0.200 | 0.655  |
| SNC5 | 2006 | 350 | 0 | 8 | 54.111 | P | 0.200 | -0.380 |
| SNA8 | 2006 | 350 | 0 | 8 | 54.168 | P | 0.200 | 0.232  |
| SND5 | 2006 | 350 | 0 | 8 | 55.013 | P | 0.200 | -0.413 |
| Q04C | 2006 | 350 | 0 | 8 | 54.124 | P | 0.200 | 0.191  |
| P09A | 2006 | 350 | 0 | 8 | 54.223 | P | 0.200 | -0.218 |
| SND4 | 2006 | 350 | 0 | 8 | 54.423 | P | 0.200 | -0.415 |
| P10A | 2006 | 350 | 0 | 8 | 54.479 | P | 0.200 | 0.172  |
| SNC7 | 2006 | 350 | 0 | 8 | 55.915 | P | 0.200 | -0.060 |
| WCN  | 2006 | 350 | 0 | 8 | 55.410 | P | 0.200 | 0.199  |
| SNE5 | 2006 | 350 | 0 | 8 | 56.445 | P | 0.200 | -0.399 |
| SNE6 | 2006 | 350 | 0 | 8 | 56.811 | P | 0.200 | -0.331 |
| P05C | 2006 | 350 | 0 | 8 | 55.956 | P | 0.200 | 0.096  |
| SUTB | 2006 | 350 | 0 | 8 | 56.063 | P | 0.200 | -0.446 |
| SND8 | 2006 | 350 | 0 | 8 | 57.683 | P | 0.200 | 0.111  |
| SND7 | 2006 | 350 | 0 | 8 | 57.819 | P | 0.200 | 0.095  |
| SNF6 | 2006 | 350 | 0 | 8 | 58.328 | P | 0.200 | -0.172 |
| P06A | 2006 | 350 | 0 | 8 | 57.643 | P | 0.200 | 0.213  |
| O09A | 2006 | 350 | 0 | 8 | 57.989 | P | 0.200 | 0.134  |
| SNG5 | 2006 | 350 | 0 | 8 | 59.112 | P | 0.200 | -0.007 |
| ORV  | 2006 | 350 | 0 | 8 | 58.127 | P | 0.200 | 0.158  |
| BEK  | 2006 | 350 | 0 | 8 | 58.859 | P | 0.200 | 0.019  |
| BMN  | 2006 | 350 | 0 | 8 | 59.227 | P | 0.200 | -0.023 |
| O07A | 2006 | 350 | 0 | 8 | 59.451 | P | 0.200 | 0.323  |
| O05C | 2006 | 350 | 0 | 8 | 59.961 | P | 0.200 | 0.118  |
| O06A | 2006 | 350 | 0 | 9 | 0.183  | P | 0.200 | 0.250  |
| GASB | 2006 | 350 | 0 | 9 | 0.885  | P | 0.200 | 0.962  |
| O04C | 2006 | 350 | 0 | 9 | 1.793  | P | 0.200 | -0.131 |
| N08A | 2006 | 350 | 0 | 9 | 2.101  | P | 0.200 | 0.087  |
| N07B | 2006 | 350 | 0 | 9 | 2.906  | P | 0.200 | 0.345  |
| O02C | 2006 | 350 | 0 | 9 | 3.015  | P | 0.200 | 0.135  |
| N06A | 2006 | 350 | 0 | 9 | 3.360  | P | 0.200 | 0.227  |
| ELFS | 2006 | 350 | 0 | 9 | 3.394  | P | 0.200 | -0.009 |
| WDC  | 2006 | 350 | 0 | 9 | 3.901  | P | 0.200 | -0.822 |
| HATC | 2006 | 350 | 0 | 9 | 4.814  | P | 0.200 | -0.235 |
| M06C | 2006 | 350 | 0 | 9 | 6.372  | P | 0.200 | 0.180  |
| M07A | 2006 | 350 | 0 | 9 | 6.563  | P | 0.200 | 0.412  |
| N02C | 2006 | 350 | 0 | 9 | 6.958  | P | 0.200 | -0.057 |
| M03C | 2006 | 350 | 0 | 9 | 7.488  | P | 0.200 | -0.691 |

|      |      |     |   |   |        |   |       |        |
|------|------|-----|---|---|--------|---|-------|--------|
| M05C | 2006 | 350 | 0 | 9 | 7.518  | P | 0.200 | -0.135 |
| M02C | 2006 | 350 | 0 | 9 | 9.402  | P | 0.200 | -0.153 |
| L07A | 2006 | 350 | 0 | 9 | 10.532 | P | 0.200 | 0.833  |
| L05A | 2006 | 350 | 0 | 9 | 11.549 | P | 0.200 | 0.318  |
| L04A | 2006 | 350 | 0 | 9 | 12.499 | P | 0.200 | -0.341 |
| K04A | 2006 | 350 | 0 | 9 | 14.834 | P | 0.200 | -0.175 |
| K05A | 2006 | 350 | 0 | 9 | 15.234 | P | 0.200 | 0.235  |
| J05A | 2006 | 350 | 0 | 9 | 18.244 | P | 0.200 | 0.088  |

|      |     |   |   |         |         |            |         |     |       |
|------|-----|---|---|---------|---------|------------|---------|-----|-------|
| 2006 | 284 | 6 | 0 | 49.5270 | 8.40500 | -103.16500 | 10.0000 | 231 | 0.002 |
|------|-----|---|---|---------|---------|------------|---------|-----|-------|

|      |      |     |   |   |        |   |       |        |
|------|------|-----|---|---|--------|---|-------|--------|
| HEC  | 2006 | 284 | 6 | 6 | 48.890 | P | 0.200 | -0.160 |
| VTV  | 2006 | 284 | 6 | 6 | 49.733 | P | 0.200 | -0.735 |
| ADO  | 2006 | 284 | 6 | 6 | 50.184 | P | 0.200 | -0.503 |
| VCS  | 2006 | 284 | 6 | 6 | 52.317 | P | 0.200 | -0.542 |
| TUQ  | 2006 | 284 | 6 | 6 | 52.578 | P | 0.200 | 0.120  |
| V11A | 2006 | 284 | 6 | 6 | 54.045 | P | 0.200 | 0.037  |
| GSC  | 2006 | 284 | 6 | 6 | 54.241 | P | 0.200 | -0.080 |
| EDW2 | 2006 | 284 | 6 | 6 | 54.422 | P | 0.200 | -0.927 |
| OSI  | 2006 | 284 | 6 | 6 | 55.627 | P | 0.200 | -0.396 |
| SHO  | 2006 | 284 | 6 | 6 | 57.031 | P | 0.200 | -0.071 |
| U11A | 2006 | 284 | 6 | 6 | 58.696 | P | 0.200 | 0.095  |
| ARV  | 2006 | 284 | 6 | 6 | 59.776 | P | 0.200 | -0.422 |
| SLA  | 2006 | 284 | 6 | 7 | 0.557  | P | 0.200 | 0.068  |
| MPP  | 2006 | 284 | 6 | 7 | 1.623  | P | 0.200 | -0.952 |
| BAK  | 2006 | 284 | 6 | 7 | 2.253  | P | 0.200 | -0.730 |
| MPM  | 2006 | 284 | 6 | 7 | 2.556  | P | 0.200 | -0.126 |
| ISA  | 2006 | 284 | 6 | 7 | 2.930  | P | 0.200 | -0.138 |
| FUR  | 2006 | 284 | 6 | 7 | 3.448  | P | 0.200 | -0.009 |
| SMM  | 2006 | 284 | 6 | 7 | 5.822  | P | 0.200 | -0.424 |
| VES  | 2006 | 284 | 6 | 7 | 6.090  | P | 0.200 | -0.488 |
| PHL  | 2006 | 284 | 6 | 7 | 8.371  | P | 0.200 | -0.818 |
| V05C | 2006 | 284 | 6 | 7 | 10.061 | P | 0.200 | 0.125  |
| GRA  | 2006 | 284 | 6 | 7 | 10.072 | P | 0.200 | 0.772  |
| RCT  | 2006 | 284 | 6 | 7 | 10.160 | P | 0.200 | -0.440 |
| RAMR | 2006 | 284 | 6 | 7 | 11.442 | P | 0.200 | -0.725 |
| PKD  | 2006 | 284 | 6 | 7 | 12.403 | P | 0.200 | -0.661 |
| HELL | 2006 | 284 | 6 | 7 | 12.615 | P | 0.200 | -0.073 |
| TIN  | 2006 | 284 | 6 | 7 | 13.115 | P | 0.200 | 0.437  |
| U05C | 2006 | 284 | 6 | 7 | 14.204 | P | 0.200 | 0.046  |
| S09A | 2006 | 284 | 6 | 7 | 14.845 | P | 0.200 | 0.281  |
| V03C | 2006 | 284 | 6 | 7 | 16.204 | P | 0.200 | -0.186 |
| S08C | 2006 | 284 | 6 | 7 | 16.628 | P | 0.200 | 0.464  |
| U04C | 2006 | 284 | 6 | 7 | 16.741 | P | 0.200 | -0.253 |
| R10A | 2006 | 284 | 6 | 7 | 16.747 | P | 0.200 | 0.548  |
| TPH  | 2006 | 284 | 6 | 7 | 17.580 | P | 0.200 | 0.279  |
| SN43 | 2006 | 284 | 6 | 7 | 19.281 | P | 0.200 | -0.788 |
| R09A | 2006 | 284 | 6 | 7 | 18.305 | P | 0.200 | 0.145  |
| Q11A | 2006 | 284 | 6 | 7 | 19.271 | P | 0.200 | 0.480  |
| MLAC | 2006 | 284 | 6 | 7 | 19.488 | P | 0.200 | 0.214  |
| HAST | 2006 | 284 | 6 | 7 | 19.866 | P | 0.200 | -0.475 |
| T05C | 2006 | 284 | 6 | 7 | 20.035 | P | 0.200 | -0.297 |
| S05C | 2006 | 284 | 6 | 7 | 21.479 | P | 0.200 | -0.838 |
| SN55 | 2006 | 284 | 6 | 7 | 22.745 | P | 0.200 | -0.300 |
| SAO  | 2006 | 284 | 6 | 7 | 21.876 | P | 0.200 | -0.613 |
| R08A | 2006 | 284 | 6 | 7 | 22.601 | P | 0.200 | 0.302  |
| PACP | 2006 | 284 | 6 | 7 | 23.192 | P | 0.200 | -0.501 |
| S06C | 2006 | 284 | 6 | 7 | 24.236 | P | 0.200 | -0.452 |
| Q08A | 2006 | 284 | 6 | 7 | 26.045 | P | 0.200 | 0.439  |
| S04C | 2006 | 284 | 6 | 7 | 26.979 | P | 0.200 | -0.323 |
| CMB  | 2006 | 284 | 6 | 7 | 27.307 | P | 0.200 | -0.451 |
| BNLO | 2006 | 284 | 6 | 7 | 27.405 | P | 0.200 | -0.789 |
| MHC  | 2006 | 284 | 6 | 7 | 27.484 | P | 0.200 | -0.037 |
| P10A | 2006 | 284 | 6 | 7 | 28.119 | P | 0.200 | 0.864  |

|      |      |     |   |   |        |   |       |        |
|------|------|-----|---|---|--------|---|-------|--------|
| R06C | 2006 | 284 | 6 | 7 | 28.788 | P | 0.200 | 0.579  |
| P09A | 2006 | 284 | 6 | 7 | 28.943 | P | 0.200 | 0.228  |
| SN93 | 2006 | 284 | 6 | 7 | 29.271 | P | 0.200 | -0.050 |
| JRSC | 2006 | 284 | 6 | 7 | 29.595 | P | 0.200 | -0.565 |
| WENL | 2006 | 284 | 6 | 7 | 30.088 | P | 0.200 | 0.309  |
| SN96 | 2006 | 284 | 6 | 7 | 30.185 | P | 0.200 | 0.291  |
| SNA3 | 2006 | 284 | 6 | 7 | 31.637 | P | 0.200 | 0.161  |
| SNA4 | 2006 | 284 | 6 | 7 | 31.685 | P | 0.200 | -0.081 |
| SN97 | 2006 | 284 | 6 | 7 | 32.050 | P | 0.200 | 0.494  |
| R04C | 2006 | 284 | 6 | 7 | 31.554 | P | 0.200 | 0.278  |
| R05C | 2006 | 284 | 6 | 7 | 31.993 | P | 0.200 | 0.156  |
| SNA8 | 2006 | 284 | 6 | 7 | 33.609 | P | 0.200 | 0.539  |
| SNB3 | 2006 | 284 | 6 | 7 | 33.777 | P | 0.200 | 0.128  |
| P08A | 2006 | 284 | 6 | 7 | 32.844 | P | 0.200 | 0.415  |
| SNA7 | 2006 | 284 | 6 | 7 | 33.992 | P | 0.200 | 0.572  |
| BRK  | 2006 | 284 | 6 | 7 | 33.204 | P | 0.200 | -0.351 |
| BKS  | 2006 | 284 | 6 | 7 | 33.473 | P | 0.200 | -0.051 |
| O09A | 2006 | 284 | 6 | 7 | 33.729 | P | 0.200 | 0.110  |
| LAVA | 2006 | 284 | 6 | 7 | 34.230 | P | 0.200 | -0.075 |
| P07A | 2006 | 284 | 6 | 7 | 34.427 | P | 0.200 | 0.604  |
| SNC4 | 2006 | 284 | 6 | 7 | 35.669 | P | 0.200 | 0.067  |
| SNC5 | 2006 | 284 | 6 | 7 | 36.280 | P | 0.200 | -0.100 |
| WCN  | 2006 | 284 | 6 | 7 | 35.667 | P | 0.200 | 0.572  |
| SNC3 | 2006 | 284 | 6 | 7 | 36.253 | P | 0.200 | 0.736  |
| SNC7 | 2006 | 284 | 6 | 7 | 37.764 | P | 0.200 | 0.359  |
| SND5 | 2006 | 284 | 6 | 7 | 37.880 | P | 0.200 | -0.239 |
| CVS  | 2006 | 284 | 6 | 7 | 37.162 | P | 0.200 | -0.541 |
| MCCM | 2006 | 284 | 6 | 7 | 37.416 | P | 0.200 | -0.569 |
| SND4 | 2006 | 284 | 6 | 7 | 37.589 | P | 0.200 | -0.208 |
| Q04C | 2006 | 284 | 6 | 7 | 37.603 | P | 0.200 | 0.453  |
| SND8 | 2006 | 284 | 6 | 7 | 39.593 | P | 0.200 | 0.356  |
| O07A | 2006 | 284 | 6 | 7 | 38.620 | P | 0.200 | 0.107  |
| SNE4 | 2006 | 284 | 6 | 7 | 39.774 | P | 0.200 | -0.120 |
| P06A | 2006 | 284 | 6 | 7 | 38.809 | P | 0.200 | 0.513  |
| Q03C | 2006 | 284 | 6 | 7 | 38.901 | P | 0.200 | 0.797  |
| SNE5 | 2006 | 284 | 6 | 7 | 40.136 | P | 0.200 | -0.233 |
| SNE6 | 2006 | 284 | 6 | 7 | 40.260 | P | 0.200 | 0.260  |
| SND7 | 2006 | 284 | 6 | 7 | 40.752 | P | 0.200 | 0.518  |
| N08A | 2006 | 284 | 6 | 7 | 41.136 | P | 0.200 | 0.028  |
| SUTB | 2006 | 284 | 6 | 7 | 41.219 | P | 0.200 | -0.176 |
| SNF6 | 2006 | 284 | 6 | 7 | 42.359 | P | 0.200 | -0.017 |
| SNE7 | 2006 | 284 | 6 | 7 | 42.597 | P | 0.200 | 0.561  |
| BEK  | 2006 | 284 | 6 | 7 | 41.601 | P | 0.200 | 0.381  |
| MNRC | 2006 | 284 | 6 | 7 | 41.825 | P | 0.200 | 0.364  |
| O06A | 2006 | 284 | 6 | 7 | 41.915 | P | 0.200 | 0.321  |
| ORV  | 2006 | 284 | 6 | 7 | 43.082 | P | 0.200 | 0.389  |
| N07B | 2006 | 284 | 6 | 7 | 43.613 | P | 0.200 | 0.096  |
| SNG5 | 2006 | 284 | 6 | 7 | 44.718 | P | 0.200 | 0.572  |
| O05C | 2006 | 284 | 6 | 7 | 44.406 | P | 0.200 | 0.611  |
| HOPS | 2006 | 284 | 6 | 7 | 44.854 | P | 0.200 | 0.217  |
| N06A | 2006 | 284 | 6 | 7 | 46.407 | P | 0.200 | 0.458  |
| O04C | 2006 | 284 | 6 | 7 | 47.305 | P | 0.200 | 0.318  |
| O03C | 2006 | 284 | 6 | 7 | 47.827 | P | 0.200 | -0.049 |
| ELFS | 2006 | 284 | 6 | 7 | 48.639 | P | 0.200 | 0.600  |
| M07A | 2006 | 284 | 6 | 7 | 48.887 | P | 0.200 | 0.139  |
| GASB | 2006 | 284 | 6 | 7 | 48.944 | P | 0.200 | 0.889  |
| P01C | 2006 | 284 | 6 | 7 | 49.595 | P | 0.200 | 0.503  |
| HATC | 2006 | 284 | 6 | 7 | 51.948 | P | 0.200 | 0.148  |
| M06C | 2006 | 284 | 6 | 7 | 51.954 | P | 0.200 | 0.548  |
| WDC  | 2006 | 284 | 6 | 7 | 52.262 | P | 0.200 | -1.573 |
| L07A | 2006 | 284 | 6 | 7 | 54.505 | P | 0.200 | 0.503  |
| M05C | 2006 | 284 | 6 | 7 | 54.658 | P | 0.200 | -0.062 |
| O01C | 2006 | 284 | 6 | 7 | 56.041 | P | 0.200 | 0.509  |

|      |      |     |   |   |        |   |       |        |
|------|------|-----|---|---|--------|---|-------|--------|
| M03C | 2006 | 284 | 6 | 7 | 56.309 | P | 0.200 | -1.065 |
| N02C | 2006 | 284 | 6 | 7 | 58.177 | P | 0.200 | -0.263 |
| L05A | 2006 | 284 | 6 | 7 | 59.256 | P | 0.200 | 0.434  |
| M04C | 2006 | 284 | 6 | 7 | 59.820 | P | 0.200 | -0.389 |
| M02C | 2006 | 284 | 6 | 7 | 59.929 | P | 0.200 | -0.907 |
| L04A | 2006 | 284 | 6 | 8 | 2.824  | P | 0.200 | -0.353 |
| K05A | 2006 | 284 | 6 | 8 | 4.335  | P | 0.200 | 0.250  |
| K04A | 2006 | 284 | 6 | 8 | 5.578  | P | 0.200 | -0.216 |
| M01C | 2006 | 284 | 6 | 8 | 8.507  | P | 0.200 | 0.065  |
| L02A | 2006 | 284 | 6 | 8 | 8.612  | P | 0.200 | -0.047 |
| J05A | 2006 | 284 | 6 | 8 | 9.323  | P | 0.200 | 0.175  |
| K02A | 2006 | 284 | 6 | 8 | 12.300 | P | 0.200 | -0.388 |
| DBO  | 2006 | 284 | 6 | 8 | 14.103 | P | 0.200 | -0.120 |
| K01A | 2006 | 284 | 6 | 8 | 16.159 | P | 0.200 | -0.078 |
| J02A | 2006 | 284 | 6 | 8 | 17.178 | P | 0.200 | 0.235  |
| I03A | 2006 | 284 | 6 | 8 | 20.226 | P | 0.200 | -0.024 |

|      |     |    |    |         |          |            |         |     |       |
|------|-----|----|----|---------|----------|------------|---------|-----|-------|
| 2006 | 323 | 18 | 57 | 34.4860 | -4.52100 | -104.83200 | 10.0000 | 245 | 0.003 |
|------|-----|----|----|---------|----------|------------|---------|-----|-------|

|      |      |     |    |   |        |   |       |        |
|------|------|-----|----|---|--------|---|-------|--------|
| VTV  | 2006 | 323 | 19 | 5 | 14.202 | P | 0.200 | -0.312 |
| HEC  | 2006 | 323 | 19 | 5 | 14.316 | P | 0.200 | -0.169 |
| DEC  | 2006 | 323 | 19 | 5 | 14.468 | P | 0.200 | 0.131  |
| CHF  | 2006 | 323 | 19 | 5 | 14.546 | P | 0.200 | 0.202  |
| ADO  | 2006 | 323 | 19 | 5 | 14.709 | P | 0.200 | 0.130  |
| VCS  | 2006 | 323 | 19 | 5 | 15.774 | P | 0.200 | -0.037 |
| RRX  | 2006 | 323 | 19 | 5 | 15.872 | P | 0.200 | -0.308 |
| EDW2 | 2006 | 323 | 19 | 5 | 17.950 | P | 0.200 | -0.543 |
| OSI  | 2006 | 323 | 19 | 5 | 17.992 | P | 0.200 | -0.100 |
| TUQ  | 2006 | 323 | 19 | 5 | 18.358 | P | 0.200 | 0.005  |
| GSC  | 2006 | 323 | 19 | 5 | 19.141 | P | 0.200 | 0.000  |
| V11A | 2006 | 323 | 19 | 5 | 20.544 | P | 0.200 | 0.071  |
| ARV  | 2006 | 323 | 19 | 5 | 22.318 | P | 0.200 | 0.136  |
| LRL  | 2006 | 323 | 19 | 5 | 22.410 | P | 0.200 | 0.050  |
| SHO  | 2006 | 323 | 19 | 5 | 22.529 | P | 0.200 | -0.017 |
| MPP  | 2006 | 323 | 19 | 5 | 22.874 | P | 0.200 | -0.250 |
| SLA  | 2006 | 323 | 19 | 5 | 24.872 | P | 0.200 | 0.230  |
| U11A | 2006 | 323 | 19 | 5 | 25.206 | P | 0.200 | 0.144  |
| ISA  | 2006 | 323 | 19 | 5 | 25.664 | P | 0.200 | 0.038  |
| MPM  | 2006 | 323 | 19 | 5 | 26.450 | P | 0.200 | -0.111 |
| SMM  | 2006 | 323 | 19 | 5 | 26.699 | P | 0.200 | 0.073  |
| U10A | 2006 | 323 | 19 | 5 | 27.138 | P | 0.200 | 0.313  |
| VES  | 2006 | 323 | 19 | 5 | 28.109 | P | 0.200 | -0.249 |
| FUR  | 2006 | 323 | 19 | 5 | 28.209 | P | 0.200 | 0.120  |
| PHL  | 2006 | 323 | 19 | 5 | 28.383 | P | 0.200 | -0.470 |
| CWC  | 2006 | 323 | 19 | 5 | 30.812 | P | 0.200 | 0.155  |
| V05C | 2006 | 323 | 19 | 5 | 31.009 | P | 0.200 | 0.425  |
| RAMR | 2006 | 323 | 19 | 5 | 31.191 | P | 0.200 | -0.239 |
| RCT  | 2006 | 323 | 19 | 5 | 31.598 | P | 0.200 | -0.618 |
| PKD  | 2006 | 323 | 19 | 5 | 32.374 | P | 0.200 | -0.497 |
| GRA  | 2006 | 323 | 19 | 5 | 33.707 | P | 0.200 | 0.436  |
| HELL | 2006 | 323 | 19 | 5 | 34.359 | P | 0.200 | -0.224 |
| TIN  | 2006 | 323 | 19 | 5 | 35.819 | P | 0.200 | 0.222  |
| U04C | 2006 | 323 | 19 | 5 | 36.743 | P | 0.200 | 0.275  |
| T06C | 2006 | 323 | 19 | 5 | 37.371 | P | 0.200 | -1.126 |
| HAST | 2006 | 323 | 19 | 5 | 38.409 | P | 0.200 | -0.340 |
| S09A | 2006 | 323 | 19 | 5 | 38.852 | P | 0.200 | 0.223  |
| S08C | 2006 | 323 | 19 | 5 | 39.322 | P | 0.200 | 0.217  |
| SN43 | 2006 | 323 | 19 | 5 | 40.480 | P | 0.200 | -0.880 |
| T05C | 2006 | 323 | 19 | 5 | 40.252 | P | 0.200 | 0.220  |
| SAO  | 2006 | 323 | 19 | 5 | 40.778 | P | 0.200 | -0.332 |
| MLAC | 2006 | 323 | 19 | 5 | 41.548 | P | 0.200 | 0.181  |
| TPH  | 2006 | 323 | 19 | 5 | 41.578 | P | 0.200 | 0.273  |
| R10A | 2006 | 323 | 19 | 5 | 41.646 | P | 0.200 | 0.410  |
| S05C | 2006 | 323 | 19 | 5 | 41.935 | P | 0.200 | -0.583 |

|      |      |     |    |   |        |   |       |        |
|------|------|-----|----|---|--------|---|-------|--------|
| PACP | 2006 | 323 | 19 | 5 | 42.347 | P | 0.200 | -0.229 |
| R09A | 2006 | 323 | 19 | 5 | 42.395 | P | 0.200 | 0.076  |
| Q11A | 2006 | 323 | 19 | 5 | 44.913 | P | 0.200 | 0.542  |
| S06C | 2006 | 323 | 19 | 5 | 45.265 | P | 0.200 | -0.235 |
| R08A | 2006 | 323 | 19 | 5 | 45.267 | P | 0.200 | -0.001 |
| BNLO | 2006 | 323 | 19 | 5 | 45.430 | P | 0.200 | -0.516 |
| R07C | 2006 | 323 | 19 | 5 | 45.554 | P | 0.200 | 0.252  |
| MHC  | 2006 | 323 | 19 | 5 | 46.155 | P | 0.200 | 0.177  |
| S04C | 2006 | 323 | 19 | 5 | 46.185 | P | 0.200 | -0.001 |
| Q09A | 2006 | 323 | 19 | 5 | 47.579 | P | 0.200 | 0.497  |
| JRSC | 2006 | 323 | 19 | 5 | 47.626 | P | 0.200 | -0.156 |
| CMB  | 2006 | 323 | 19 | 5 | 47.657 | P | 0.200 | -0.283 |
| WENL | 2006 | 323 | 19 | 5 | 48.640 | P | 0.200 | 0.556  |
| Q08A | 2006 | 323 | 19 | 5 | 48.826 | P | 0.200 | 0.187  |
| SN93 | 2006 | 323 | 19 | 5 | 49.345 | P | 0.200 | 0.177  |
| R06C | 2006 | 323 | 19 | 5 | 50.026 | P | 0.200 | 0.533  |
| SNA3 | 2006 | 323 | 19 | 5 | 51.530 | P | 0.200 | 0.272  |
| SN96 | 2006 | 323 | 19 | 5 | 50.654 | P | 0.200 | 0.197  |
| SNA4 | 2006 | 323 | 19 | 5 | 51.744 | P | 0.200 | -0.031 |
| R04C | 2006 | 323 | 19 | 5 | 51.110 | P | 0.200 | 0.399  |
| BRK  | 2006 | 323 | 19 | 5 | 51.121 | P | 0.200 | -0.134 |
| BKS  | 2006 | 323 | 19 | 5 | 51.224 | P | 0.200 | -0.020 |
| BDM  | 2006 | 323 | 19 | 5 | 51.225 | P | 0.200 | 0.304  |
| BRIB | 2006 | 323 | 19 | 5 | 51.512 | P | 0.200 | 0.081  |
| Q07A | 2006 | 323 | 19 | 5 | 51.541 | P | 0.200 | 0.466  |
| FARB | 2006 | 323 | 19 | 5 | 51.646 | P | 0.200 | -0.481 |
| SN97 | 2006 | 323 | 19 | 5 | 52.886 | P | 0.200 | 0.495  |
| P10A | 2006 | 323 | 19 | 5 | 52.114 | P | 0.200 | 0.375  |
| SNB3 | 2006 | 323 | 19 | 5 | 53.168 | P | 0.200 | 0.125  |
| P09A | 2006 | 323 | 19 | 5 | 52.290 | P | 0.200 | -0.228 |
| R05C | 2006 | 323 | 19 | 5 | 52.460 | P | 0.200 | 0.081  |
| SNB5 | 2006 | 323 | 19 | 5 | 54.204 | P | 0.200 | -0.081 |
| SNC3 | 2006 | 323 | 19 | 5 | 54.238 | P | 0.200 | -0.457 |
| SNA8 | 2006 | 323 | 19 | 5 | 54.560 | P | 0.200 | 0.431  |
| SNA7 | 2006 | 323 | 19 | 5 | 54.654 | P | 0.200 | 0.476  |
| LAVA | 2006 | 323 | 19 | 5 | 53.881 | P | 0.200 | -0.116 |
| SNC4 | 2006 | 323 | 19 | 5 | 55.058 | P | 0.200 | 0.036  |
| SNB7 | 2006 | 323 | 19 | 5 | 55.456 | P | 0.200 | 0.475  |
| CVS  | 2006 | 323 | 19 | 5 | 54.926 | P | 0.200 | -0.277 |
| SNC5 | 2006 | 323 | 19 | 5 | 55.954 | P | 0.200 | -0.099 |
| P08A | 2006 | 323 | 19 | 5 | 55.331 | P | 0.200 | 0.187  |
| SND5 | 2006 | 323 | 19 | 5 | 57.232 | P | 0.200 | -0.307 |
| P07A | 2006 | 323 | 19 | 5 | 56.290 | P | 0.200 | 0.637  |
| WCN  | 2006 | 323 | 19 | 5 | 56.313 | P | 0.200 | 0.357  |
| Q04C | 2006 | 323 | 19 | 5 | 56.414 | P | 0.200 | 0.345  |
| SNC7 | 2006 | 323 | 19 | 5 | 57.661 | P | 0.200 | 0.117  |
| O09A | 2006 | 323 | 19 | 5 | 56.844 | P | 0.200 | -0.306 |
| SND4 | 2006 | 323 | 19 | 5 | 56.905 | P | 0.200 | -0.049 |
| Q03C | 2006 | 323 | 19 | 5 | 57.006 | P | 0.200 | 0.786  |
| SNE4 | 2006 | 323 | 19 | 5 | 58.719 | P | 0.200 | -0.155 |
| P05C | 2006 | 323 | 19 | 5 | 58.074 | P | 0.200 | 0.361  |
| SNE5 | 2006 | 323 | 19 | 5 | 59.399 | P | 0.200 | -0.135 |
| SNE6 | 2006 | 323 | 19 | 5 | 59.548 | P | 0.200 | 0.007  |
| BMN  | 2006 | 323 | 19 | 5 | 58.667 | P | 0.200 | -0.397 |
| SND8 | 2006 | 323 | 19 | 5 | 59.700 | P | 0.200 | 0.174  |
| SND7 | 2006 | 323 | 19 | 6 | 0.200  | P | 0.200 | 0.106  |
| P06A | 2006 | 323 | 19 | 5 | 59.243 | P | 0.200 | 0.280  |
| MNRC | 2006 | 323 | 19 | 5 | 59.452 | P | 0.200 | 0.424  |
| SUTB | 2006 | 323 | 19 | 5 | 59.576 | P | 0.200 | -0.229 |
| O07A | 2006 | 323 | 19 | 6 | 0.425  | P | 0.200 | 0.177  |
| SNF6 | 2006 | 323 | 19 | 6 | 1.442  | P | 0.200 | -0.170 |
| SNE9 | 2006 | 323 | 19 | 6 | 1.958  | P | 0.200 | -0.131 |
| BEK  | 2006 | 323 | 19 | 6 | 1.528  | P | 0.200 | 0.223  |

|      |      |     |    |   |        |   |       |        |
|------|------|-----|----|---|--------|---|-------|--------|
| ORV  | 2006 | 323 | 19 | 6 | 1.782  | P | 0.200 | 0.338  |
| HOPS | 2006 | 323 | 19 | 6 | 1.795  | P | 0.200 | 0.377  |
| SNG5 | 2006 | 323 | 19 | 6 | 3.080  | P | 0.200 | 0.167  |
| O06A | 2006 | 323 | 19 | 6 | 2.459  | P | 0.200 | 0.192  |
| N08A | 2006 | 323 | 19 | 6 | 3.534  | P | 0.200 | 0.035  |
| O05C | 2006 | 323 | 19 | 6 | 3.573  | P | 0.200 | 0.328  |
| N07B | 2006 | 323 | 19 | 6 | 5.076  | P | 0.200 | 0.092  |
| O03C | 2006 | 323 | 19 | 6 | 5.576  | P | 0.200 | -0.406 |
| P01C | 2006 | 323 | 19 | 6 | 5.843  | P | 0.200 | 0.242  |
| O04C | 2006 | 323 | 19 | 6 | 6.342  | P | 0.200 | 0.183  |
| GASB | 2006 | 323 | 19 | 6 | 6.368  | P | 0.200 | 1.064  |
| N06A | 2006 | 323 | 19 | 6 | 6.740  | P | 0.200 | 0.241  |
| O02C | 2006 | 323 | 19 | 6 | 8.993  | P | 0.200 | -0.168 |
| WDC  | 2006 | 323 | 19 | 6 | 9.942  | P | 0.200 | -1.374 |
| M07A | 2006 | 323 | 19 | 6 | 10.085 | P | 0.200 | 0.208  |
| HATC | 2006 | 323 | 19 | 6 | 10.154 | P | 0.200 | -0.375 |
| M06C | 2006 | 323 | 19 | 6 | 11.298 | P | 0.200 | 0.122  |
| M05C | 2006 | 323 | 19 | 6 | 13.394 | P | 0.200 | -0.343 |
| M03C | 2006 | 323 | 19 | 6 | 14.321 | P | 0.200 | -1.001 |
| N02C | 2006 | 323 | 19 | 6 | 14.907 | P | 0.200 | -0.159 |
| L07A | 2006 | 323 | 19 | 6 | 15.259 | P | 0.200 | 0.473  |
| M02C | 2006 | 323 | 19 | 6 | 17.507 | P | 0.200 | -0.419 |
| M04C | 2006 | 323 | 19 | 6 | 17.884 | P | 0.200 | -0.543 |
| L05A | 2006 | 323 | 19 | 6 | 18.204 | P | 0.200 | 0.148  |
| YBH  | 2006 | 323 | 19 | 6 | 18.704 | P | 0.200 | -1.253 |
| L04A | 2006 | 323 | 19 | 6 | 20.824 | P | 0.200 | -0.430 |
| K05A | 2006 | 323 | 19 | 6 | 23.170 | P | 0.200 | 0.052  |
| K04A | 2006 | 323 | 19 | 6 | 23.571 | P | 0.200 | -0.391 |
| L02A | 2006 | 323 | 19 | 6 | 24.850 | P | 0.200 | -0.010 |
| J05A | 2006 | 323 | 19 | 6 | 27.528 | P | 0.200 | -0.162 |
| K02A | 2006 | 323 | 19 | 6 | 28.656 | P | 0.200 | -0.313 |
| J04A | 2006 | 323 | 19 | 6 | 28.837 | P | 0.200 | -0.355 |

|      |      |     |    |         |           |            |         |        |       |
|------|------|-----|----|---------|-----------|------------|---------|--------|-------|
| 2007 | 146  | 2   | 44 | 47.6554 | -35.92800 | -103.09700 | 10.0000 | 329    | 0.004 |
| SVD  | 2007 | 146 | 2  | 56      | 4.610     | P          | 0.200   | -0.014 |       |
| BFS  | 2007 | 146 | 2  | 56      | 5.883     | P          | 0.200   | -0.241 |       |
| DJJ  | 2007 | 146 | 2  | 56      | 5.929     | P          | 0.200   | -0.230 |       |
| PASC | 2007 | 146 | 2  | 56      | 6.061     | P          | 0.200   | -0.073 |       |
| MWC  | 2007 | 146 | 2  | 56      | 6.428     | P          | 0.200   | -0.068 |       |
| LGU  | 2007 | 146 | 2  | 56      | 6.545     | P          | 0.200   | -0.238 |       |
| CHF  | 2007 | 146 | 2  | 56      | 7.038     | P          | 0.200   | 0.021  |       |
| VTV  | 2007 | 146 | 2  | 56      | 7.232     | P          | 0.200   | -0.405 |       |
| VCS  | 2007 | 146 | 2  | 56      | 7.821     | P          | 0.200   | -0.264 |       |
| HEC  | 2007 | 146 | 2  | 56      | 8.170     | P          | 0.200   | -0.054 |       |
| OSI  | 2007 | 146 | 2  | 56      | 9.062     | P          | 0.200   | -0.344 |       |
| EDW2 | 2007 | 146 | 2  | 56      | 9.664     | P          | 0.200   | -0.522 |       |
| TUQ  | 2007 | 146 | 2  | 56      | 11.401    | P          | 0.200   | 0.020  |       |
| GSC  | 2007 | 146 | 2  | 56      | 11.453    | P          | 0.200   | -0.010 |       |
| MPP  | 2007 | 146 | 2  | 56      | 12.372    | P          | 0.200   | -0.018 |       |
| V11A | 2007 | 146 | 2  | 56      | 13.168    | P          | 0.200   | -0.022 |       |
| LRL  | 2007 | 146 | 2  | 56      | 13.273    | P          | 0.200   | -0.031 |       |
| SHO  | 2007 | 146 | 2  | 56      | 14.036    | P          | 0.200   | -0.254 |       |
| SMM  | 2007 | 146 | 2  | 56      | 15.094    | P          | 0.200   | 0.142  |       |
| SLA  | 2007 | 146 | 2  | 56      | 15.256    | P          | 0.200   | -0.089 |       |
| PHL  | 2007 | 146 | 2  | 56      | 15.944    | P          | 0.200   | -0.281 |       |
| MPM  | 2007 | 146 | 2  | 56      | 16.429    | P          | 0.200   | -0.227 |       |
| U11A | 2007 | 146 | 2  | 56      | 16.587    | P          | 0.200   | -0.081 |       |
| VES  | 2007 | 146 | 2  | 56      | 16.670    | P          | 0.200   | -0.227 |       |
| FUR  | 2007 | 146 | 2  | 56      | 18.078    | P          | 0.200   | 0.041  |       |
| V05C | 2007 | 146 | 2  | 56      | 18.550    | P          | 0.200   | 0.512  |       |
| RCT  | 2007 | 146 | 2  | 56      | 18.904    | P          | 0.200   | -0.854 |       |
| PKD  | 2007 | 146 | 2  | 56      | 19.154    | P          | 0.200   | -0.126 |       |
| CWC  | 2007 | 146 | 2  | 56      | 19.430    | P          | 0.200   | 0.029  |       |

|      |      |     |   |    |        |   |       |        |
|------|------|-----|---|----|--------|---|-------|--------|
| TPNV | 2007 | 146 | 2 | 56 | 20.787 | P | 0.200 | 0.385  |
| HELL | 2007 | 146 | 2 | 56 | 20.998 | P | 0.200 | -0.688 |
| T11A | 2007 | 146 | 2 | 56 | 21.431 | P | 0.200 | 0.086  |
| GRA  | 2007 | 146 | 2 | 56 | 21.900 | P | 0.200 | 0.194  |
| U04C | 2007 | 146 | 2 | 56 | 22.361 | P | 0.200 | 0.564  |
| TIN  | 2007 | 146 | 2 | 56 | 23.041 | P | 0.200 | 0.084  |
| T06C | 2007 | 146 | 2 | 56 | 23.253 | P | 0.200 | -0.917 |
| SN14 | 2007 | 146 | 2 | 56 | 23.890 | P | 0.200 | -0.536 |
| S11A | 2007 | 146 | 2 | 56 | 24.487 | P | 0.200 | 0.517  |
| SAO  | 2007 | 146 | 2 | 56 | 24.725 | P | 0.200 | -0.161 |
| T05C | 2007 | 146 | 2 | 56 | 25.331 | P | 0.200 | 0.685  |
| SN34 | 2007 | 146 | 2 | 56 | 25.415 | P | 0.200 | -0.516 |
| S08C | 2007 | 146 | 2 | 56 | 25.856 | P | 0.200 | 0.210  |
| S09A | 2007 | 146 | 2 | 56 | 25.962 | P | 0.200 | 0.200  |
| SN43 | 2007 | 146 | 2 | 56 | 25.993 | P | 0.200 | -0.515 |
| S10A | 2007 | 146 | 2 | 56 | 26.212 | P | 0.200 | -0.186 |
| PACP | 2007 | 146 | 2 | 56 | 26.294 | P | 0.200 | 0.162  |
| MLAC | 2007 | 146 | 2 | 56 | 26.975 | P | 0.200 | 0.055  |
| TPH  | 2007 | 146 | 2 | 56 | 27.944 | P | 0.200 | 0.181  |
| R11A | 2007 | 146 | 2 | 56 | 28.113 | P | 0.200 | 0.113  |
| R10A | 2007 | 146 | 2 | 56 | 28.426 | P | 0.200 | 0.243  |
| SN63 | 2007 | 146 | 2 | 56 | 28.581 | P | 0.200 | 0.007  |
| R09A | 2007 | 146 | 2 | 56 | 28.684 | P | 0.200 | 0.044  |
| MHC  | 2007 | 146 | 2 | 56 | 28.834 | P | 0.200 | 0.329  |
| S04C | 2007 | 146 | 2 | 56 | 29.211 | P | 0.200 | 0.383  |
| SN64 | 2007 | 146 | 2 | 56 | 29.353 | P | 0.200 | 0.113  |
| S06C | 2007 | 146 | 2 | 56 | 29.465 | P | 0.200 | 0.051  |
| SN74 | 2007 | 146 | 2 | 56 | 30.034 | P | 0.200 | -0.102 |
| R07C | 2007 | 146 | 2 | 56 | 30.118 | P | 0.200 | 0.369  |
| R08A | 2007 | 146 | 2 | 56 | 30.225 | P | 0.200 | -0.080 |
| CMB  | 2007 | 146 | 2 | 56 | 30.711 | P | 0.200 | -0.158 |
| SN75 | 2007 | 146 | 2 | 56 | 30.862 | P | 0.200 | 0.043  |
| Q11A | 2007 | 146 | 2 | 56 | 31.026 | P | 0.200 | 0.254  |
| Q10A | 2007 | 146 | 2 | 56 | 31.281 | P | 0.200 | -0.012 |
| SN93 | 2007 | 146 | 2 | 56 | 31.960 | P | 0.200 | 0.400  |
| SN95 | 2007 | 146 | 2 | 56 | 32.316 | P | 0.200 | -0.176 |
| Q09A | 2007 | 146 | 2 | 56 | 32.322 | P | 0.200 | 0.273  |
| Q08A | 2007 | 146 | 2 | 56 | 32.715 | P | 0.200 | -0.128 |
| R06C | 2007 | 146 | 2 | 56 | 33.104 | P | 0.200 | 0.487  |
| SN96 | 2007 | 146 | 2 | 56 | 33.122 | P | 0.200 | 0.074  |
| SN86 | 2007 | 146 | 2 | 56 | 33.215 | P | 0.200 | 0.228  |
| SNA3 | 2007 | 146 | 2 | 56 | 33.397 | P | 0.200 | 0.267  |
| SNA4 | 2007 | 146 | 2 | 56 | 33.461 | P | 0.200 | -0.211 |
| SNA5 | 2007 | 146 | 2 | 56 | 34.252 | P | 0.200 | 0.074  |
| SN87 | 2007 | 146 | 2 | 56 | 34.303 | P | 0.200 | 0.428  |
| SNB3 | 2007 | 146 | 2 | 56 | 34.305 | P | 0.200 | 0.000  |
| R05C | 2007 | 146 | 2 | 56 | 34.565 | P | 0.200 | 0.096  |
| Q07A | 2007 | 146 | 2 | 56 | 34.599 | P | 0.200 | 0.462  |
| LAVA | 2007 | 146 | 2 | 56 | 34.982 | P | 0.200 | -0.167 |
| SN98 | 2007 | 146 | 2 | 56 | 35.055 | P | 0.200 | 0.230  |
| SN97 | 2007 | 146 | 2 | 56 | 35.062 | P | 0.200 | 0.452  |
| SNB5 | 2007 | 146 | 2 | 56 | 35.350 | P | 0.200 | -0.203 |
| SNC3 | 2007 | 146 | 2 | 56 | 35.512 | P | 0.200 | 0.127  |
| SNB6 | 2007 | 146 | 2 | 56 | 35.617 | P | 0.200 | 0.068  |
| SNC4 | 2007 | 146 | 2 | 56 | 35.679 | P | 0.200 | -0.058 |
| P10A | 2007 | 146 | 2 | 56 | 35.829 | P | 0.200 | -0.014 |
| SNA8 | 2007 | 146 | 2 | 56 | 36.181 | P | 0.200 | 0.189  |
| SNA7 | 2007 | 146 | 2 | 56 | 36.203 | P | 0.200 | 0.258  |
| SNC5 | 2007 | 146 | 2 | 56 | 36.241 | P | 0.200 | -0.478 |
| Q04C | 2007 | 146 | 2 | 56 | 36.513 | P | 0.200 | 0.253  |
| SNB7 | 2007 | 146 | 2 | 56 | 36.569 | P | 0.200 | 0.240  |
| SND4 | 2007 | 146 | 2 | 56 | 36.709 | P | 0.200 | -0.407 |
| SNC6 | 2007 | 146 | 2 | 56 | 36.809 | P | 0.200 | 0.079  |

|      |      |     |   |    |        |   |       |        |
|------|------|-----|---|----|--------|---|-------|--------|
| SND5 | 2007 | 146 | 2 | 56 | 37.247 | P | 0.200 | -0.406 |
| SNB9 | 2007 | 146 | 2 | 56 | 37.516 | P | 0.200 | 0.040  |
| WCN  | 2007 | 146 | 2 | 56 | 37.519 | P | 0.200 | 0.256  |
| P08A | 2007 | 146 | 2 | 56 | 37.673 | P | 0.200 | 0.080  |
| SNC7 | 2007 | 146 | 2 | 56 | 38.010 | P | 0.200 | -0.105 |
| MNRC | 2007 | 146 | 2 | 56 | 38.036 | P | 0.200 | 0.280  |
| SNE4 | 2007 | 146 | 2 | 56 | 38.043 | P | 0.200 | -0.420 |
| P05C | 2007 | 146 | 2 | 56 | 38.133 | P | 0.200 | 0.102  |
| SUTB | 2007 | 146 | 2 | 56 | 38.407 | P | 0.200 | -0.443 |
| SNE5 | 2007 | 146 | 2 | 56 | 38.786 | P | 0.200 | -0.291 |
| SNC8 | 2007 | 146 | 2 | 56 | 39.002 | P | 0.200 | 0.429  |
| SNE6 | 2007 | 146 | 2 | 56 | 39.048 | P | 0.200 | -0.276 |
| O09A | 2007 | 146 | 2 | 56 | 39.337 | P | 0.200 | -0.102 |
| P06A | 2007 | 146 | 2 | 56 | 39.627 | P | 0.200 | 0.164  |
| SND8 | 2007 | 146 | 2 | 56 | 39.764 | P | 0.200 | 0.110  |
| SND7 | 2007 | 146 | 2 | 56 | 39.901 | P | 0.200 | 0.048  |
| ORV  | 2007 | 146 | 2 | 56 | 40.441 | P | 0.200 | 0.210  |
| SNF6 | 2007 | 146 | 2 | 56 | 40.473 | P | 0.200 | -0.227 |
| BMN  | 2007 | 146 | 2 | 56 | 40.550 | P | 0.200 | -0.264 |
| SND9 | 2007 | 146 | 2 | 56 | 40.745 | P | 0.200 | 0.404  |
| O08A | 2007 | 146 | 2 | 56 | 40.760 | P | 0.200 | -0.310 |
| BEK  | 2007 | 146 | 2 | 56 | 40.982 | P | 0.200 | 0.078  |
| O07A | 2007 | 146 | 2 | 56 | 41.187 | P | 0.200 | 0.238  |
| SNE7 | 2007 | 146 | 2 | 56 | 41.223 | P | 0.200 | 0.157  |
| SNG5 | 2007 | 146 | 2 | 56 | 41.360 | P | 0.200 | -0.001 |
| SNE9 | 2007 | 146 | 2 | 56 | 41.811 | P | 0.200 | 0.177  |
| O06A | 2007 | 146 | 2 | 56 | 42.099 | P | 0.200 | 0.210  |
| O05C | 2007 | 146 | 2 | 56 | 42.147 | P | 0.200 | 0.170  |
| SNF8 | 2007 | 146 | 2 | 56 | 42.315 | P | 0.200 | 0.232  |
| P01C | 2007 | 146 | 2 | 56 | 42.406 | P | 0.200 | 0.268  |
| SNF9 | 2007 | 146 | 2 | 56 | 42.573 | P | 0.200 | -0.118 |
| O03C | 2007 | 146 | 2 | 56 | 42.628 | P | 0.200 | -0.632 |
| GASB | 2007 | 146 | 2 | 56 | 43.394 | P | 0.200 | 1.061  |
| N08A | 2007 | 146 | 2 | 56 | 43.463 | P | 0.200 | -0.205 |
| O04C | 2007 | 146 | 2 | 56 | 43.906 | P | 0.200 | -0.133 |
| N07B | 2007 | 146 | 2 | 56 | 44.633 | P | 0.200 | 0.305  |
| N06A | 2007 | 146 | 2 | 56 | 45.206 | P | 0.200 | 0.196  |
| O02C | 2007 | 146 | 2 | 56 | 45.366 | P | 0.200 | 0.151  |
| ELFS | 2007 | 146 | 2 | 56 | 45.374 | P | 0.200 | -0.044 |
| WDC  | 2007 | 146 | 2 | 56 | 46.118 | P | 0.200 | -0.861 |
| HATC | 2007 | 146 | 2 | 56 | 46.864 | P | 0.200 | -0.273 |
| M07A | 2007 | 146 | 2 | 56 | 48.096 | P | 0.200 | 0.230  |
| M06C | 2007 | 146 | 2 | 56 | 48.197 | P | 0.200 | 0.085  |
| N02C | 2007 | 146 | 2 | 56 | 49.387 | P | 0.200 | 0.040  |
| M05C | 2007 | 146 | 2 | 56 | 49.510 | P | 0.200 | -0.130 |
| M03C | 2007 | 146 | 2 | 56 | 49.713 | P | 0.200 | -0.591 |
| JCC  | 2007 | 146 | 2 | 56 | 49.983 | P | 0.200 | -0.035 |
| M02C | 2007 | 146 | 2 | 56 | 51.652 | P | 0.200 | -0.103 |
| L07A | 2007 | 146 | 2 | 56 | 51.964 | P | 0.200 | 0.591  |
| YBH  | 2007 | 146 | 2 | 56 | 52.415 | P | 0.200 | -0.922 |
| M04C | 2007 | 146 | 2 | 56 | 52.526 | P | 0.200 | -0.228 |
| L05A | 2007 | 146 | 2 | 56 | 53.317 | P | 0.200 | 0.230  |
| L04A | 2007 | 146 | 2 | 56 | 54.482 | P | 0.200 | -0.331 |
| K04A | 2007 | 146 | 2 | 56 | 56.642 | P | 0.200 | -0.274 |
| K05A | 2007 | 146 | 2 | 56 | 56.977 | P | 0.200 | 0.188  |
| HUMO | 2007 | 146 | 2 | 56 | 57.820 | P | 0.200 | -0.247 |
| L02A | 2007 | 146 | 2 | 56 | 58.023 | P | 0.200 | 1.545  |
| K02A | 2007 | 146 | 2 | 56 | 59.430 | P | 0.200 | -0.128 |
| J05A | 2007 | 146 | 2 | 56 | 59.959 | P | 0.200 | 0.044  |
| J04A | 2007 | 146 | 2 | 57 | 0.370  | P | 0.200 | -0.176 |
| DBO  | 2007 | 146 | 2 | 57 | 1.106  | P | 0.200 | 0.105  |
| J03A | 2007 | 146 | 2 | 57 | 2.141  | P | 0.200 | 0.145  |
| J02A | 2007 | 146 | 2 | 57 | 2.422  | P | 0.200 | -0.081 |



|      |      |     |    |         |           |            |         |        |     |        |
|------|------|-----|----|---------|-----------|------------|---------|--------|-----|--------|
| I04A | 2007 | 146 | 2  | 57      | 2.907     | P          | 0.200   | -0.548 |     |        |
| 2007 | 165  | 13  | 37 | 42.8934 | -36.20800 | -100.15200 | 10.0000 |        | 331 | -0.006 |
| CIA  | 2007 | 165 | 13 | 49      | 2.089     | P          | 0.200   | -0.370 |     |        |
| FMP  | 2007 | 165 | 13 | 49      | 3.882     | P          | 0.200   | -0.277 |     |        |
| RPV  | 2007 | 165 | 13 | 49      | 4.256     | P          | 0.200   | -0.157 |     |        |
| SVD  | 2007 | 165 | 13 | 49      | 4.844     | P          | 0.200   | -0.044 |     |        |
| BBR  | 2007 | 165 | 13 | 49      | 5.683     | P          | 0.200   | -0.064 |     |        |
| BFS  | 2007 | 165 | 13 | 49      | 6.157     | P          | 0.200   | -0.321 |     |        |
| PASC | 2007 | 165 | 13 | 49      | 6.541     | P          | 0.200   | -0.051 |     |        |
| DJJ  | 2007 | 165 | 13 | 49      | 6.567     | P          | 0.200   | -0.106 |     |        |
| MWC  | 2007 | 165 | 13 | 49      | 6.828     | P          | 0.200   | -0.092 |     |        |
| LGU  | 2007 | 165 | 13 | 49      | 7.094     | P          | 0.200   | -0.314 |     |        |
| DEC  | 2007 | 165 | 13 | 49      | 7.257     | P          | 0.200   | 0.032  |     |        |
| SCZ2 | 2007 | 165 | 13 | 49      | 7.280     | P          | 0.200   | -0.227 |     |        |
| CHF  | 2007 | 165 | 13 | 49      | 7.369     | P          | 0.200   | -0.057 |     |        |
| VTV  | 2007 | 165 | 13 | 49      | 7.407     | P          | 0.200   | -0.482 |     |        |
| HEC  | 2007 | 165 | 13 | 49      | 8.178     | P          | 0.200   | -0.087 |     |        |
| VCS  | 2007 | 165 | 13 | 49      | 8.201     | P          | 0.200   | -0.292 |     |        |
| OSI  | 2007 | 165 | 13 | 49      | 9.586     | P          | 0.200   | -0.325 |     |        |
| EDW2 | 2007 | 165 | 13 | 49      | 10.024    | P          | 0.200   | -0.504 |     |        |
| TUQ  | 2007 | 165 | 13 | 49      | 11.315    | P          | 0.200   | 0.042  |     |        |
| GSC  | 2007 | 165 | 13 | 49      | 11.446    | P          | 0.200   | -0.107 |     |        |
| ARV  | 2007 | 165 | 13 | 49      | 12.894    | P          | 0.200   | 0.095  |     |        |
| V11A | 2007 | 165 | 13 | 49      | 12.898    | P          | 0.200   | -0.046 |     |        |
| LRL  | 2007 | 165 | 13 | 49      | 13.456    | P          | 0.200   | -0.070 |     |        |
| SHO  | 2007 | 165 | 13 | 49      | 13.916    | P          | 0.200   | -0.272 |     |        |
| SLA  | 2007 | 165 | 13 | 49      | 15.270    | P          | 0.200   | -0.160 |     |        |
| SMM  | 2007 | 165 | 13 | 49      | 15.805    | P          | 0.200   | 0.217  |     |        |
| U11A | 2007 | 165 | 13 | 49      | 16.347    | P          | 0.200   | -0.015 |     |        |
| MPM  | 2007 | 165 | 13 | 49      | 16.510    | P          | 0.200   | -0.262 |     |        |
| PHL  | 2007 | 165 | 13 | 49      | 16.788    | P          | 0.200   | -0.176 |     |        |
| VES  | 2007 | 165 | 13 | 49      | 17.007    | P          | 0.200   | -0.309 |     |        |
| FUR  | 2007 | 165 | 13 | 49      | 18.052    | P          | 0.200   | 0.060  |     |        |
| V05C | 2007 | 165 | 13 | 49      | 19.126    | P          | 0.200   | 0.526  |     |        |
| RCT  | 2007 | 165 | 13 | 49      | 19.212    | P          | 0.200   | -0.940 |     |        |
| CWC  | 2007 | 165 | 13 | 49      | 19.571    | P          | 0.200   | 0.002  |     |        |
| PKD  | 2007 | 165 | 13 | 49      | 19.828    | P          | 0.200   | -0.112 |     |        |
| TPNV | 2007 | 165 | 13 | 49      | 20.598    | P          | 0.200   | 0.408  |     |        |
| T11A | 2007 | 165 | 13 | 49      | 21.079    | P          | 0.200   | 0.162  |     |        |
| HELL | 2007 | 165 | 13 | 49      | 21.322    | P          | 0.200   | -0.669 |     |        |
| GRA  | 2007 | 165 | 13 | 49      | 21.853    | P          | 0.200   | 0.160  |     |        |
| U04C | 2007 | 165 | 13 | 49      | 23.070    | P          | 0.200   | 0.634  |     |        |
| TIN  | 2007 | 165 | 13 | 49      | 23.186    | P          | 0.200   | 0.101  |     |        |
| T06C | 2007 | 165 | 13 | 49      | 23.603    | P          | 0.200   | -0.951 |     |        |
| HAST | 2007 | 165 | 13 | 49      | 23.831    | P          | 0.200   | 0.113  |     |        |
| SAO  | 2007 | 165 | 13 | 49      | 25.640    | P          | 0.200   | 0.051  |     |        |
| S09A | 2007 | 165 | 13 | 49      | 25.759    | P          | 0.200   | 0.119  |     |        |
| S10A | 2007 | 165 | 13 | 49      | 25.880    | P          | 0.200   | -0.262 |     |        |
| S08C | 2007 | 165 | 13 | 49      | 25.890    | P          | 0.200   | 0.170  |     |        |
| MLAC | 2007 | 165 | 13 | 49      | 27.054    | P          | 0.200   | -0.029 |     |        |
| PACP | 2007 | 165 | 13 | 49      | 27.101    | P          | 0.200   | 0.327  |     |        |
| S05C | 2007 | 165 | 13 | 49      | 27.218    | P          | 0.200   | -0.003 |     |        |
| R11A | 2007 | 165 | 13 | 49      | 27.613    | P          | 0.200   | 0.091  |     |        |
| TPH  | 2007 | 165 | 13 | 49      | 27.752    | P          | 0.200   | 0.150  |     |        |
| R10A | 2007 | 165 | 13 | 49      | 28.104    | P          | 0.200   | 0.277  |     |        |
| R09A | 2007 | 165 | 13 | 49      | 28.449    | P          | 0.200   | 0.014  |     |        |
| BNLO | 2007 | 165 | 13 | 49      | 28.654    | P          | 0.200   | -0.157 |     |        |
| SN63 | 2007 | 165 | 13 | 49      | 28.859    | P          | 0.200   | -0.018 |     |        |
| SN55 | 2007 | 165 | 13 | 49      | 29.278    | P          | 0.200   | 0.034  |     |        |
| SN64 | 2007 | 165 | 13 | 49      | 29.587    | P          | 0.200   | 0.083  |     |        |
| MHC  | 2007 | 165 | 13 | 49      | 29.654    | P          | 0.200   | 0.497  |     |        |
| S06C | 2007 | 165 | 13 | 49      | 29.680    | P          | 0.200   | -0.030 |     |        |

|      |      |     |    |    |        |   |       |        |
|------|------|-----|----|----|--------|---|-------|--------|
| S04C | 2007 | 165 | 13 | 49 | 29.759 | P | 0.200 | 0.359  |
| R08A | 2007 | 165 | 13 | 49 | 30.150 | P | 0.200 | -0.112 |
| R07C | 2007 | 165 | 13 | 49 | 30.227 | P | 0.200 | 0.337  |
| Q11A | 2007 | 165 | 13 | 49 | 30.487 | P | 0.200 | 0.242  |
| Q10A | 2007 | 165 | 13 | 49 | 30.920 | P | 0.200 | 0.018  |
| SN75 | 2007 | 165 | 13 | 49 | 30.972 | P | 0.200 | -0.089 |
| CMB  | 2007 | 165 | 13 | 49 | 31.042 | P | 0.200 | -0.193 |
| WENL | 2007 | 165 | 13 | 49 | 31.178 | P | 0.200 | 0.640  |
| Q09A | 2007 | 165 | 13 | 49 | 32.040 | P | 0.200 | 0.246  |
| SN93 | 2007 | 165 | 13 | 49 | 32.262 | P | 0.200 | 0.325  |
| Q08A | 2007 | 165 | 13 | 49 | 32.553 | P | 0.200 | -0.147 |
| BRK  | 2007 | 165 | 13 | 49 | 32.775 | P | 0.200 | 0.160  |
| BDM  | 2007 | 165 | 13 | 49 | 33.113 | P | 0.200 | 0.486  |
| R06C | 2007 | 165 | 13 | 49 | 33.176 | P | 0.200 | 0.408  |
| SN86 | 2007 | 165 | 13 | 49 | 33.348 | P | 0.200 | 0.155  |
| R04C | 2007 | 165 | 13 | 49 | 33.355 | P | 0.200 | 0.447  |
| SN96 | 2007 | 165 | 13 | 49 | 33.394 | P | 0.200 | 0.099  |
| SNA3 | 2007 | 165 | 13 | 49 | 33.686 | P | 0.200 | 0.182  |
| SNA4 | 2007 | 165 | 13 | 49 | 33.808 | P | 0.200 | -0.198 |
| SN87 | 2007 | 165 | 13 | 49 | 34.482 | P | 0.200 | 0.446  |
| SNA5 | 2007 | 165 | 13 | 49 | 34.499 | P | 0.200 | 0.047  |
| Q07A | 2007 | 165 | 13 | 49 | 34.520 | P | 0.200 | 0.383  |
| SNB3 | 2007 | 165 | 13 | 49 | 34.765 | P | 0.200 | 0.071  |
| R05C | 2007 | 165 | 13 | 49 | 34.765 | P | 0.200 | 0.063  |
| SN98 | 2007 | 165 | 13 | 49 | 35.125 | P | 0.200 | 0.196  |
| SN97 | 2007 | 165 | 13 | 49 | 35.207 | P | 0.200 | 0.424  |
| P09A | 2007 | 165 | 13 | 49 | 35.264 | P | 0.200 | -0.496 |
| CVS  | 2007 | 165 | 13 | 49 | 35.268 | P | 0.200 | -0.262 |
| LAVA | 2007 | 165 | 13 | 49 | 35.279 | P | 0.200 | -0.208 |
| P10A | 2007 | 165 | 13 | 49 | 35.296 | P | 0.200 | -0.080 |
| SNB5 | 2007 | 165 | 13 | 49 | 35.607 | P | 0.200 | -0.245 |
| SNB6 | 2007 | 165 | 13 | 49 | 35.824 | P | 0.200 | 0.036  |
| SNC3 | 2007 | 165 | 13 | 49 | 35.935 | P | 0.200 | 0.133  |
| SNC4 | 2007 | 165 | 13 | 49 | 35.947 | P | 0.200 | -0.143 |
| SNA8 | 2007 | 165 | 13 | 49 | 36.259 | P | 0.200 | 0.154  |
| SNA7 | 2007 | 165 | 13 | 49 | 36.387 | P | 0.200 | 0.264  |
| SNC5 | 2007 | 165 | 13 | 49 | 36.606 | P | 0.200 | -0.413 |
| SNB7 | 2007 | 165 | 13 | 49 | 36.738 | P | 0.200 | 0.206  |
| Q04C | 2007 | 165 | 13 | 49 | 36.997 | P | 0.200 | 0.307  |
| SNC6 | 2007 | 165 | 13 | 49 | 37.072 | P | 0.200 | 0.094  |
| SND4 | 2007 | 165 | 13 | 49 | 37.136 | P | 0.200 | -0.336 |
| P08A | 2007 | 165 | 13 | 49 | 37.492 | P | 0.200 | 0.097  |
| SND5 | 2007 | 165 | 13 | 49 | 37.568 | P | 0.200 | -0.392 |
| WCN  | 2007 | 165 | 13 | 49 | 37.596 | P | 0.200 | 0.217  |
| SNB9 | 2007 | 165 | 13 | 49 | 37.661 | P | 0.200 | 0.103  |
| P07A | 2007 | 165 | 13 | 49 | 37.912 | P | 0.200 | 0.460  |
| SNC7 | 2007 | 165 | 13 | 49 | 38.233 | P | 0.200 | -0.094 |
| SNE4 | 2007 | 165 | 13 | 49 | 38.421 | P | 0.200 | -0.409 |
| P05C | 2007 | 165 | 13 | 49 | 38.441 | P | 0.200 | 0.169  |
| MNRC | 2007 | 165 | 13 | 49 | 38.724 | P | 0.200 | 0.398  |
| SUTB | 2007 | 165 | 13 | 49 | 38.852 | P | 0.200 | -0.420 |
| O09A | 2007 | 165 | 13 | 49 | 38.912 | P | 0.200 | -0.129 |
| SNE5 | 2007 | 165 | 13 | 49 | 39.118 | P | 0.200 | -0.264 |
| SNE6 | 2007 | 165 | 13 | 49 | 39.271 | P | 0.200 | -0.296 |
| P06A | 2007 | 165 | 13 | 49 | 39.631 | P | 0.200 | 0.081  |
| SND8 | 2007 | 165 | 13 | 49 | 39.871 | P | 0.200 | 0.083  |
| BMN  | 2007 | 165 | 13 | 49 | 40.052 | P | 0.200 | -0.333 |
| SND7 | 2007 | 165 | 13 | 49 | 40.065 | P | 0.200 | 0.022  |
| O08A | 2007 | 165 | 13 | 49 | 40.424 | P | 0.200 | -0.387 |
| SND9 | 2007 | 165 | 13 | 49 | 40.798 | P | 0.200 | 0.384  |
| SNF6 | 2007 | 165 | 13 | 49 | 40.806 | P | 0.200 | -0.150 |
| ORV  | 2007 | 165 | 13 | 49 | 40.852 | P | 0.200 | 0.302  |
| O07A | 2007 | 165 | 13 | 49 | 40.977 | P | 0.200 | 0.171  |

|      |      |     |    |    |        |   |       |        |
|------|------|-----|----|----|--------|---|-------|--------|
| BEK  | 2007 | 165 | 13 | 49 | 41.083 | P | 0.200 | 0.063  |
| SNE7 | 2007 | 165 | 13 | 49 | 41.385 | P | 0.200 | 0.132  |
| SNG5 | 2007 | 165 | 13 | 49 | 41.703 | P | 0.200 | 0.012  |
| SNE9 | 2007 | 165 | 13 | 49 | 41.867 | P | 0.200 | 0.158  |
| O05C | 2007 | 165 | 13 | 49 | 42.270 | P | 0.200 | 0.095  |
| SNF8 | 2007 | 165 | 13 | 49 | 42.441 | P | 0.200 | 0.215  |
| SNF9 | 2007 | 165 | 13 | 49 | 42.642 | P | 0.200 | -0.149 |
| O03C | 2007 | 165 | 13 | 49 | 43.160 | P | 0.200 | -0.475 |
| N08A | 2007 | 165 | 13 | 49 | 43.170 | P | 0.200 | -0.188 |
| P01C | 2007 | 165 | 13 | 49 | 43.195 | P | 0.200 | 0.431  |
| SNG7 | 2007 | 165 | 13 | 49 | 43.211 | P | 0.200 | -0.061 |
| GASB | 2007 | 165 | 13 | 49 | 43.920 | P | 0.200 | 1.077  |
| O04C | 2007 | 165 | 13 | 49 | 44.060 | P | 0.200 | -0.166 |
| N07B | 2007 | 165 | 13 | 49 | 44.366 | P | 0.200 | 0.215  |
| N06A | 2007 | 165 | 13 | 49 | 45.023 | P | 0.200 | 0.065  |
| ELFS | 2007 | 165 | 13 | 49 | 45.488 | P | 0.200 | -0.036 |
| O02C | 2007 | 165 | 13 | 49 | 45.882 | P | 0.200 | 0.216  |
| WDC  | 2007 | 165 | 13 | 49 | 46.547 | P | 0.200 | -0.804 |
| HATC | 2007 | 165 | 13 | 49 | 47.110 | P | 0.200 | -0.202 |
| M07A | 2007 | 165 | 13 | 49 | 47.840 | P | 0.200 | 0.201  |
| M06C | 2007 | 165 | 13 | 49 | 48.204 | P | 0.200 | 0.123  |
| M05C | 2007 | 165 | 13 | 49 | 49.543 | P | 0.200 | -0.151 |
| N02C | 2007 | 165 | 13 | 49 | 49.840 | P | 0.200 | 0.055  |
| M03C | 2007 | 165 | 13 | 49 | 49.943 | P | 0.200 | -0.567 |
| L07A | 2007 | 165 | 13 | 49 | 51.660 | P | 0.200 | 0.561  |
| M02C | 2007 | 165 | 13 | 49 | 52.017 | P | 0.200 | -0.042 |
| M04C | 2007 | 165 | 13 | 49 | 52.703 | P | 0.200 | -0.167 |
| YBH  | 2007 | 165 | 13 | 49 | 52.767 | P | 0.200 | -0.803 |
| L05A | 2007 | 165 | 13 | 49 | 53.172 | P | 0.200 | 0.152  |
| L04A | 2007 | 165 | 13 | 49 | 54.616 | P | 0.200 | -0.255 |
| K04A | 2007 | 165 | 13 | 49 | 56.700 | P | 0.200 | -0.199 |
| L02A | 2007 | 165 | 13 | 49 | 56.938 | P | 0.200 | 0.170  |
| K05A | 2007 | 165 | 13 | 49 | 56.958 | P | 0.200 | 0.313  |
| HUMO | 2007 | 165 | 13 | 49 | 58.142 | P | 0.200 | -0.072 |
| J05A | 2007 | 165 | 13 | 49 | 59.819 | P | 0.200 | 0.062  |
| K02A | 2007 | 165 | 13 | 49 | 59.850 | P | 0.200 | 0.085  |
| J04A | 2007 | 165 | 13 | 50 | 0.450  | P | 0.200 | -0.053 |
| DBO  | 2007 | 165 | 13 | 50 | 1.400  | P | 0.200 | 0.274  |
| J03A | 2007 | 165 | 13 | 50 | 2.266  | P | 0.200 | 0.208  |
| J02A | 2007 | 165 | 13 | 50 | 2.876  | P | 0.200 | 0.235  |
| I04A | 2007 | 165 | 13 | 50 | 2.958  | P | 0.200 | -0.426 |
| I03A | 2007 | 165 | 13 | 50 | 5.406  | P | 0.200 | 0.069  |

|      |     |    |    |         |          |            |         |     |        |
|------|-----|----|----|---------|----------|------------|---------|-----|--------|
| 2007 | 216 | 14 | 24 | 51.3495 | -4.79700 | -105.40600 | 10.0000 | 344 | -0.001 |
|------|-----|----|----|---------|----------|------------|---------|-----|--------|

|      |      |     |    |    |        |   |       |        |
|------|------|-----|----|----|--------|---|-------|--------|
| DEC  | 2007 | 216 | 14 | 32 | 31.855 | P | 0.200 | -0.128 |
| VTV  | 2007 | 216 | 14 | 32 | 31.961 | P | 0.200 | -0.324 |
| CHF  | 2007 | 216 | 14 | 32 | 31.970 | P | 0.200 | -0.058 |
| HEC  | 2007 | 216 | 14 | 32 | 32.243 | P | 0.200 | -0.135 |
| VCS  | 2007 | 216 | 14 | 32 | 33.294 | P | 0.200 | -0.207 |
| EDW2 | 2007 | 216 | 14 | 32 | 35.550 | P | 0.200 | -0.655 |
| SBC  | 2007 | 216 | 14 | 32 | 36.382 | P | 0.200 | -0.338 |
| TUQ  | 2007 | 216 | 14 | 32 | 36.598 | P | 0.200 | 0.282  |
| GSC  | 2007 | 216 | 14 | 32 | 36.983 | P | 0.200 | -0.020 |
| V11A | 2007 | 216 | 14 | 32 | 38.697 | P | 0.200 | 0.208  |
| ARV  | 2007 | 216 | 14 | 32 | 39.738 | P | 0.200 | -0.072 |
| LRL  | 2007 | 216 | 14 | 32 | 40.065 | P | 0.200 | -0.066 |
| MPP  | 2007 | 216 | 14 | 32 | 40.132 | P | 0.200 | -0.510 |
| SHO  | 2007 | 216 | 14 | 32 | 40.646 | P | 0.200 | 0.163  |
| SLA  | 2007 | 216 | 14 | 32 | 42.633 | P | 0.200 | 0.170  |
| ISA  | 2007 | 216 | 14 | 32 | 43.393 | P | 0.200 | 0.075  |
| U11A | 2007 | 216 | 14 | 32 | 43.430 | P | 0.200 | 0.327  |
| SMM  | 2007 | 216 | 14 | 32 | 43.907 | P | 0.200 | -0.243 |
| MPM  | 2007 | 216 | 14 | 32 | 44.395 | P | 0.200 | 0.021  |

|      |      |     |    |    |        |   |       |        |
|------|------|-----|----|----|--------|---|-------|--------|
| U10A | 2007 | 216 | 14 | 32 | 45.113 | P | 0.200 | 0.348  |
| VES  | 2007 | 216 | 14 | 32 | 45.532 | P | 0.200 | -0.465 |
| FUR  | 2007 | 216 | 14 | 32 | 46.082 | P | 0.200 | 0.108  |
| V04C | 2007 | 216 | 14 | 32 | 48.276 | P | 0.200 | -0.607 |
| V05C | 2007 | 216 | 14 | 32 | 48.301 | P | 0.200 | 0.159  |
| CWC  | 2007 | 216 | 14 | 32 | 48.610 | P | 0.200 | 0.183  |
| RCT  | 2007 | 216 | 14 | 32 | 49.124 | P | 0.200 | -0.734 |
| TPNV | 2007 | 216 | 14 | 32 | 49.498 | P | 0.200 | 0.803  |
| PKD  | 2007 | 216 | 14 | 32 | 49.656 | P | 0.200 | -0.716 |
| T11A | 2007 | 216 | 14 | 32 | 49.838 | P | 0.200 | 0.477  |
| GRA  | 2007 | 216 | 14 | 32 | 51.696 | P | 0.200 | 0.573  |
| HELL | 2007 | 216 | 14 | 32 | 51.972 | P | 0.200 | -0.286 |
| V03C | 2007 | 216 | 14 | 32 | 52.283 | P | 0.200 | -0.328 |
| TIN  | 2007 | 216 | 14 | 32 | 53.574 | P | 0.200 | 0.202  |
| U04C | 2007 | 216 | 14 | 32 | 53.971 | P | 0.200 | 0.018  |
| S11A | 2007 | 216 | 14 | 32 | 54.002 | P | 0.200 | 0.755  |
| T06C | 2007 | 216 | 14 | 32 | 54.930 | P | 0.200 | -1.187 |
| HAST | 2007 | 216 | 14 | 32 | 55.763 | P | 0.200 | -0.406 |
| S09A | 2007 | 216 | 14 | 32 | 56.877 | P | 0.200 | 0.361  |
| S10A | 2007 | 216 | 14 | 32 | 57.111 | P | 0.200 | 0.147  |
| S08C | 2007 | 216 | 14 | 32 | 57.248 | P | 0.200 | 0.349  |
| T05C | 2007 | 216 | 14 | 32 | 57.513 | P | 0.200 | -0.050 |
| SAO  | 2007 | 216 | 14 | 32 | 58.060 | P | 0.200 | -0.494 |
| R11A | 2007 | 216 | 14 | 32 | 59.063 | P | 0.200 | 0.484  |
| MLAC | 2007 | 216 | 14 | 32 | 59.114 | P | 0.200 | 0.016  |
| S05C | 2007 | 216 | 14 | 32 | 59.597 | P | 0.200 | -0.504 |
| TPH  | 2007 | 216 | 14 | 32 | 59.612 | P | 0.200 | 0.408  |
| PACP | 2007 | 216 | 14 | 32 | 59.755 | P | 0.200 | -0.289 |
| R10A | 2007 | 216 | 14 | 32 | 59.775 | P | 0.200 | 0.546  |
| R09A | 2007 | 216 | 14 | 33 | 0.599  | P | 0.200 | 0.358  |
| SN63 | 2007 | 216 | 14 | 33 | 1.513  | P | 0.200 | -0.504 |
| YO01 | 2007 | 216 | 14 | 33 | 1.673  | P | 0.200 | -0.511 |
| YO09 | 2007 | 216 | 14 | 33 | 1.732  | P | 0.200 | -0.375 |
| YO08 | 2007 | 216 | 14 | 33 | 1.867  | P | 0.200 | -0.218 |
| YO02 | 2007 | 216 | 14 | 33 | 1.882  | P | 0.200 | -0.471 |
| YO03 | 2007 | 216 | 14 | 33 | 1.944  | P | 0.200 | -0.479 |
| YO10 | 2007 | 216 | 14 | 33 | 1.946  | P | 0.200 | -0.389 |
| YO07 | 2007 | 216 | 14 | 33 | 1.994  | P | 0.200 | -0.360 |
| SN55 | 2007 | 216 | 14 | 33 | 1.999  | P | 0.200 | -0.201 |
| YO11 | 2007 | 216 | 14 | 33 | 2.110  | P | 0.200 | -0.317 |
| YO04 | 2007 | 216 | 14 | 33 | 2.227  | P | 0.200 | -0.273 |
| YO05 | 2007 | 216 | 14 | 33 | 2.323  | P | 0.200 | -0.319 |
| YO06 | 2007 | 216 | 14 | 33 | 2.347  | P | 0.200 | -0.317 |
| SN64 | 2007 | 216 | 14 | 33 | 2.475  | P | 0.200 | -0.305 |
| BNLO | 2007 | 216 | 14 | 33 | 2.661  | P | 0.200 | -0.678 |
| S06C | 2007 | 216 | 14 | 33 | 2.845  | P | 0.200 | -0.294 |
| Q11A | 2007 | 216 | 14 | 33 | 3.116  | P | 0.200 | 0.673  |
| R07C | 2007 | 216 | 14 | 33 | 3.265  | P | 0.200 | 0.232  |
| R08A | 2007 | 216 | 14 | 33 | 3.276  | P | 0.200 | 0.188  |
| MHC  | 2007 | 216 | 14 | 33 | 3.445  | P | 0.200 | 0.018  |
| S04C | 2007 | 216 | 14 | 33 | 3.662  | P | 0.200 | -0.015 |
| Q10A | 2007 | 216 | 14 | 33 | 4.115  | P | 0.200 | 0.562  |
| CMB  | 2007 | 216 | 14 | 33 | 5.192  | P | 0.200 | -0.350 |
| Q09A | 2007 | 216 | 14 | 33 | 5.588  | P | 0.200 | 0.585  |
| WENL | 2007 | 216 | 14 | 33 | 5.882  | P | 0.200 | 0.340  |
| SN93 | 2007 | 216 | 14 | 33 | 6.815  | P | 0.200 | 0.062  |
| Q08A | 2007 | 216 | 14 | 33 | 6.817  | P | 0.200 | 0.318  |
| R06C | 2007 | 216 | 14 | 33 | 7.616  | P | 0.200 | 0.416  |
| SN86 | 2007 | 216 | 14 | 33 | 8.105  | P | 0.200 | 0.244  |
| BRK  | 2007 | 216 | 14 | 33 | 8.379  | P | 0.200 | -0.302 |
| SN96 | 2007 | 216 | 14 | 33 | 8.388  | P | 0.200 | 0.282  |
| BDM  | 2007 | 216 | 14 | 33 | 8.522  | P | 0.200 | 0.134  |
| R04C | 2007 | 216 | 14 | 33 | 8.553  | P | 0.200 | 0.284  |

|      |      |     |    |    |        |   |       |        |
|------|------|-----|----|----|--------|---|-------|--------|
| SNA3 | 2007 | 216 | 14 | 33 | 9.049  | P | 0.200 | 0.203  |
| SN87 | 2007 | 216 | 14 | 33 | 9.242  | P | 0.200 | 0.365  |
| SNA4 | 2007 | 216 | 14 | 33 | 9.284  | P | 0.200 | -0.101 |
| Q07A | 2007 | 216 | 14 | 33 | 9.353  | P | 0.200 | 0.499  |
| SNA5 | 2007 | 216 | 14 | 33 | 10.100 | P | 0.200 | 0.166  |
| R05C | 2007 | 216 | 14 | 33 | 10.149 | P | 0.200 | 0.114  |
| P10A | 2007 | 216 | 14 | 33 | 10.209 | P | 0.200 | 0.459  |
| SN98 | 2007 | 216 | 14 | 33 | 10.342 | P | 0.200 | 0.260  |
| P09A | 2007 | 216 | 14 | 33 | 10.472 | P | 0.200 | 0.007  |
| SN97 | 2007 | 216 | 14 | 33 | 10.553 | P | 0.200 | 0.482  |
| SNB3 | 2007 | 216 | 14 | 33 | 10.719 | P | 0.200 | 0.107  |
| LAVA | 2007 | 216 | 14 | 33 | 11.462 | P | 0.200 | -0.129 |
| SNB5 | 2007 | 216 | 14 | 33 | 11.855 | P | 0.200 | -0.046 |
| SNB6 | 2007 | 216 | 14 | 33 | 11.903 | P | 0.200 | 0.191  |
| MCCM | 2007 | 216 | 14 | 33 | 11.922 | P | 0.200 | -0.347 |
| CVS  | 2007 | 216 | 14 | 33 | 12.138 | P | 0.200 | -0.490 |
| SNC3 | 2007 | 216 | 14 | 33 | 12.326 | P | 0.200 | 0.074  |
| SNC4 | 2007 | 216 | 14 | 33 | 12.625 | P | 0.200 | 0.018  |
| SNB7 | 2007 | 216 | 14 | 33 | 12.951 | P | 0.200 | 0.313  |
| SNC5 | 2007 | 216 | 14 | 33 | 13.495 | P | 0.200 | -0.162 |
| P08A | 2007 | 216 | 14 | 33 | 13.533 | P | 0.200 | 0.522  |
| SNC6 | 2007 | 216 | 14 | 33 | 13.754 | P | 0.200 | 0.291  |
| Q04C | 2007 | 216 | 14 | 33 | 13.892 | P | 0.200 | 0.277  |
| P07A | 2007 | 216 | 14 | 33 | 14.015 | P | 0.200 | 0.569  |
| SNB9 | 2007 | 216 | 14 | 33 | 14.089 | P | 0.200 | 0.327  |
| WCN  | 2007 | 216 | 14 | 33 | 14.102 | P | 0.200 | 0.439  |
| Q03C | 2007 | 216 | 14 | 33 | 14.269 | P | 0.200 | 0.570  |
| SND4 | 2007 | 216 | 14 | 33 | 14.459 | P | 0.200 | -0.069 |
| SND5 | 2007 | 216 | 14 | 33 | 14.813 | P | 0.200 | -0.325 |
| O09A | 2007 | 216 | 14 | 33 | 15.187 | P | 0.200 | 0.074  |
| SNC7 | 2007 | 216 | 14 | 33 | 15.345 | P | 0.200 | 0.152  |
| P05C | 2007 | 216 | 14 | 33 | 15.688 | P | 0.200 | 0.342  |
| SNE4 | 2007 | 216 | 14 | 33 | 16.265 | P | 0.200 | -0.179 |
| SNE5 | 2007 | 216 | 14 | 33 | 16.868 | P | 0.200 | -0.258 |
| SUTB | 2007 | 216 | 14 | 33 | 16.935 | P | 0.200 | -0.392 |
| BMN  | 2007 | 216 | 14 | 33 | 16.963 | P | 0.200 | -0.072 |
| P06A | 2007 | 216 | 14 | 33 | 16.983 | P | 0.200 | 0.308  |
| SNE6 | 2007 | 216 | 14 | 33 | 17.048 | P | 0.200 | -0.113 |
| SND8 | 2007 | 216 | 14 | 33 | 17.411 | P | 0.200 | 0.205  |
| SND7 | 2007 | 216 | 14 | 33 | 18.029 | P | 0.200 | 0.287  |
| SND9 | 2007 | 216 | 14 | 33 | 18.300 | P | 0.200 | 0.353  |
| O07A | 2007 | 216 | 14 | 33 | 18.369 | P | 0.200 | 0.303  |
| SNF6 | 2007 | 216 | 14 | 33 | 19.028 | P | 0.200 | -0.186 |
| BEK  | 2007 | 216 | 14 | 33 | 19.234 | P | 0.200 | 0.257  |
| ORV  | 2007 | 216 | 14 | 33 | 19.278 | P | 0.200 | 0.266  |
| SNE7 | 2007 | 216 | 14 | 33 | 19.640 | P | 0.200 | 0.248  |
| SNE9 | 2007 | 216 | 14 | 33 | 20.135 | P | 0.200 | 0.356  |
| O06A | 2007 | 216 | 14 | 33 | 20.271 | P | 0.200 | 0.278  |
| SNG5 | 2007 | 216 | 14 | 33 | 20.630 | P | 0.200 | 0.150  |
| SNF8 | 2007 | 216 | 14 | 33 | 21.095 | P | 0.200 | 0.369  |
| O05C | 2007 | 216 | 14 | 33 | 21.134 | P | 0.200 | 0.261  |
| N08A | 2007 | 216 | 14 | 33 | 21.510 | P | 0.200 | 0.120  |
| SNF9 | 2007 | 216 | 14 | 33 | 21.566 | P | 0.200 | 0.151  |
| SNG7 | 2007 | 216 | 14 | 33 | 22.665 | P | 0.200 | 0.189  |
| N07B | 2007 | 216 | 14 | 33 | 23.030 | P | 0.200 | 0.228  |
| GASB | 2007 | 216 | 14 | 33 | 23.665 | P | 0.200 | 0.902  |
| O04C | 2007 | 216 | 14 | 33 | 23.902 | P | 0.200 | 0.116  |
| N06A | 2007 | 216 | 14 | 33 | 24.620 | P | 0.200 | 0.371  |
| ELFS | 2007 | 216 | 14 | 33 | 25.600 | P | 0.200 | 0.285  |
| O02C | 2007 | 216 | 14 | 33 | 26.556 | P | 0.200 | -0.083 |
| WDC  | 2007 | 216 | 14 | 33 | 27.491 | P | 0.200 | -1.338 |
| HATC | 2007 | 216 | 14 | 33 | 27.851 | P | 0.200 | -0.296 |
| M07A | 2007 | 216 | 14 | 33 | 28.090 | P | 0.200 | 0.386  |

|      |      |     |    |    |        |   |       |        |
|------|------|-----|----|----|--------|---|-------|--------|
| M06C | 2007 | 216 | 14 | 33 | 29.090 | P | 0.200 | 0.209  |
| M05C | 2007 | 216 | 14 | 33 | 31.036 | P | 0.200 | -0.360 |
| M03C | 2007 | 216 | 14 | 33 | 31.882 | P | 0.200 | -1.017 |
| N02C | 2007 | 216 | 14 | 33 | 32.305 | P | 0.200 | -0.223 |
| L07A | 2007 | 216 | 14 | 33 | 33.318 | P | 0.200 | 0.704  |
| JCC  | 2007 | 216 | 14 | 33 | 34.030 | P | 0.200 | -0.058 |
| M02C | 2007 | 216 | 14 | 33 | 35.064 | P | 0.200 | -0.390 |
| M04C | 2007 | 216 | 14 | 33 | 35.586 | P | 0.200 | -0.465 |
| L05A | 2007 | 216 | 14 | 33 | 35.944 | P | 0.200 | 0.182  |
| YBH  | 2007 | 216 | 14 | 33 | 36.436 | P | 0.200 | -1.070 |
| L04A | 2007 | 216 | 14 | 33 | 38.436 | P | 0.200 | -0.444 |
| K05A | 2007 | 216 | 14 | 33 | 40.928 | P | 0.200 | 0.084  |
| K04A | 2007 | 216 | 14 | 33 | 41.310 | P | 0.200 | -0.309 |
| M01C | 2007 | 216 | 14 | 33 | 41.556 | P | 0.200 | 0.010  |
| L02A | 2007 | 216 | 14 | 33 | 42.230 | P | 0.200 | -0.123 |
| HUMO | 2007 | 216 | 14 | 33 | 43.576 | P | 0.200 | -0.461 |
| J05A | 2007 | 216 | 14 | 33 | 45.476 | P | 0.200 | 0.068  |
| K02A | 2007 | 216 | 14 | 33 | 46.268 | P | 0.200 | -0.233 |
| J04A | 2007 | 216 | 14 | 33 | 46.568 | P | 0.200 | -0.277 |
| DBO  | 2007 | 216 | 14 | 33 | 48.320 | P | 0.200 | 0.039  |
| J03A | 2007 | 216 | 14 | 33 | 49.224 | P | 0.200 | -0.221 |
| I04A | 2007 | 216 | 14 | 33 | 50.463 | P | 0.200 | -0.672 |
| TAKO | 2007 | 216 | 14 | 33 | 54.367 | P | 0.200 | 0.027  |

|      |      |     |    |         |           |            |         |        |       |
|------|------|-----|----|---------|-----------|------------|---------|--------|-------|
| 1988 | 212  | 2   | 45 | 15.9801 | -24.42300 | -116.11500 | 10.0000 | 417    | 0.000 |
| arc  | 1988 | 212 | 2  | 55      | 23.750    | P          | 0.200   | 0.020  |       |
| bmd  | 1988 | 212 | 2  | 55      | 22.880    | P          | 0.200   | 0.083  |       |
| jhn  | 1988 | 212 | 2  | 55      | 23.300    | P          | 0.200   | -0.009 |       |
| mnk  | 1988 | 212 | 2  | 55      | 26.720    | P          | 0.200   | -0.154 |       |
| WMD  | 1988 | 212 | 2  | 55      | 25.120    | P          | 0.200   | 0.009  |       |
| jun  | 1988 | 212 | 2  | 55      | 27.610    | P          | 0.200   | -0.072 |       |
| twr  | 1988 | 212 | 2  | 55      | 26.150    | P          | 0.200   | 0.125  |       |
| BLK  | 1988 | 212 | 2  | 55      | 17.130    | P          | 0.200   | 0.226  |       |
| BMT  | 1988 | 212 | 2  | 55      | 17.600    | P          | 0.200   | -0.068 |       |
| DTP  | 1988 | 212 | 2  | 55      | 18.070    | P          | 0.200   | -0.137 |       |
| ISA  | 1988 | 212 | 2  | 55      | 21.250    | P          | 0.200   | 0.074  |       |
| WJP  | 1988 | 212 | 2  | 55      | 19.730    | P          | 0.200   | 0.287  |       |
| CLC  | 1988 | 212 | 2  | 55      | 21.840    | P          | 0.200   | -0.191 |       |
| LRM  | 1988 | 212 | 2  | 55      | 19.700    | P          | 0.200   | 0.044  |       |
| TEJ  | 1988 | 212 | 2  | 55      | 18.200    | P          | 0.200   | 0.053  |       |
| TOW  | 1988 | 212 | 2  | 55      | 22.050    | P          | 0.200   | 0.066  |       |
| WCH  | 1988 | 212 | 2  | 55      | 22.830    | P          | 0.200   | -0.018 |       |
| WCS  | 1988 | 212 | 2  | 55      | 23.580    | P          | 0.200   | 0.025  |       |
| WCX  | 1988 | 212 | 2  | 55      | 20.590    | P          | 0.200   | -0.692 |       |
| WHS  | 1988 | 212 | 2  | 55      | 24.290    | P          | 0.200   | 0.146  |       |
| WOF  | 1988 | 212 | 2  | 55      | 20.450    | P          | 0.200   | 0.017  |       |
| WRC  | 1988 | 212 | 2  | 55      | 22.950    | P          | 0.200   | -0.028 |       |
| WVP  | 1988 | 212 | 2  | 55      | 23.050    | P          | 0.200   | -0.014 |       |
| XMS  | 1988 | 212 | 2  | 55      | 20.120    | P          | 0.200   | 0.208  |       |

|      |      |     |    |         |           |            |         |        |        |
|------|------|-----|----|---------|-----------|------------|---------|--------|--------|
| 1988 | 223  | 11  | 46 | 49.2196 | -28.15200 | -112.67000 | 10.0000 | 423    | -0.003 |
| arc  | 1988 | 223 | 11 | 57      | 23.250    | P          | 0.200   | 0.089  |        |
| bmd  | 1988 | 223 | 11 | 57      | 22.280    | P          | 0.200   | 0.008  |        |
| ccr  | 1988 | 223 | 11 | 57      | 27.000    | P          | 0.200   | -0.291 |        |
| jhn  | 1988 | 223 | 11 | 57      | 22.800    | P          | 0.200   | -0.006 |        |
| pmt  | 1988 | 223 | 11 | 57      | 23.130    | P          | 0.200   | 0.047  |        |
| WMD  | 1988 | 223 | 11 | 57      | 24.500    | P          | 0.200   | -0.043 |        |
| cou  | 1988 | 223 | 11 | 57      | 25.790    | P          | 0.200   | 0.233  |        |
| jun  | 1988 | 223 | 11 | 57      | 26.880    | P          | 0.200   | -0.068 |        |
| twr  | 1988 | 223 | 11 | 57      | 25.480    | P          | 0.200   | 0.114  |        |
| wil  | 1988 | 223 | 11 | 57      | 24.800    | P          | 0.200   | 0.159  |        |
| BLK  | 1988 | 223 | 11 | 57      | 16.460    | P          | 0.200   | 0.189  |        |
| BMT  | 1988 | 223 | 11 | 57      | 17.200    | P          | 0.200   | -0.260 |        |

|     |      |     |    |    |        |   |       |        |
|-----|------|-----|----|----|--------|---|-------|--------|
| DTP | 1988 | 223 | 11 | 57 | 17.540 | P | 0.200 | -0.180 |
| FLS | 1988 | 223 | 11 | 57 | 15.410 | P | 0.200 | -0.072 |
| GSC | 1988 | 223 | 11 | 57 | 17.920 | P | 0.200 | 0.329  |
| HOD | 1988 | 223 | 11 | 57 | 14.360 | P | 0.200 | -0.309 |
| ISA | 1988 | 223 | 11 | 57 | 20.760 | P | 0.200 | 0.000  |
| JAW | 1988 | 223 | 11 | 57 | 18.050 | P | 0.200 | -0.147 |
| JFS | 1988 | 223 | 11 | 57 | 18.350 | P | 0.200 | 0.040  |
| SBK | 1988 | 223 | 11 | 57 | 16.250 | P | 0.200 | -0.198 |
| WHV | 1988 | 223 | 11 | 57 | 19.800 | P | 0.200 | 0.099  |
| WJP | 1988 | 223 | 11 | 57 | 19.380 | P | 0.200 | 0.269  |

|      |      |     |    |        |           |            |         |        |        |
|------|------|-----|----|--------|-----------|------------|---------|--------|--------|
| 2005 | 356  | 12  | 20 | 6.1926 | -54.71900 | -135.86800 | 10.0000 | 51     | -0.001 |
| PAS  | 2005 | 356 | 12 | 33     | 3.531     | P          | 0.200   | -0.641 |        |
| MWC  | 2005 | 356 | 12 | 33     | 4.303     | P          | 0.200   | -0.590 |        |
| SVD  | 2005 | 356 | 12 | 33     | 4.437     | P          | 0.200   | -0.487 |        |
| DEC  | 2005 | 356 | 12 | 33     | 4.504     | P          | 0.200   | -0.047 |        |
| BFS  | 2005 | 356 | 12 | 33     | 5.047     | P          | 0.200   | -0.070 |        |
| VCS  | 2005 | 356 | 12 | 33     | 5.053     | P          | 0.200   | -0.829 |        |
| BBR  | 2005 | 356 | 12 | 33     | 6.126     | P          | 0.200   | 0.204  |        |
| MPP  | 2005 | 356 | 12 | 33     | 6.919     | P          | 0.200   | 0.206  |        |
| EDW2 | 2005 | 356 | 12 | 33     | 7.553     | P          | 0.200   | -0.181 |        |
| ARV  | 2005 | 356 | 12 | 33     | 8.175     | P          | 0.200   | 0.055  |        |
| SMM  | 2005 | 356 | 12 | 33     | 8.759     | P          | 0.200   | 0.286  |        |
| HEC  | 2005 | 356 | 12 | 33     | 8.936     | P          | 0.200   | 0.249  |        |
| GSC  | 2005 | 356 | 12 | 33     | 10.692    | P          | 0.200   | 0.185  |        |
| LRL  | 2005 | 356 | 12 | 33     | 10.740    | P          | 0.200   | 0.078  |        |
| VES  | 2005 | 356 | 12 | 33     | 11.021    | P          | 0.200   | -0.235 |        |
| ISA  | 2005 | 356 | 12 | 33     | 11.099    | P          | 0.200   | 0.098  |        |
| PKD  | 2005 | 356 | 12 | 33     | 11.175    | P          | 0.200   | 0.252  |        |
| V05C | 2005 | 356 | 12 | 33     | 11.739    | P          | 0.200   | 0.780  |        |
| TUQ  | 2005 | 356 | 12 | 33     | 12.141    | P          | 0.200   | 0.306  |        |
| SLA  | 2005 | 356 | 12 | 33     | 12.231    | P          | 0.200   | -0.762 |        |
| RCT  | 2005 | 356 | 12 | 33     | 12.586    | P          | 0.200   | -0.758 |        |
| HAST | 2005 | 356 | 12 | 33     | 12.695    | P          | 0.200   | 0.350  |        |
| SCZ  | 2005 | 356 | 12 | 33     | 12.829    | P          | 0.200   | -0.449 |        |
| U04C | 2005 | 356 | 12 | 33     | 13.495    | P          | 0.200   | 0.846  |        |
| SHO  | 2005 | 356 | 12 | 33     | 13.582    | P          | 0.200   | 0.023  |        |
| MPM  | 2005 | 356 | 12 | 33     | 13.598    | P          | 0.200   | 0.030  |        |
| SN11 | 2005 | 356 | 12 | 33     | 14.085    | P          | 0.200   | -0.839 |        |
| SAO  | 2005 | 356 | 12 | 33     | 14.368    | P          | 0.200   | 0.184  |        |
| HELL | 2005 | 356 | 12 | 33     | 14.625    | P          | 0.200   | -0.683 |        |
| CWC  | 2005 | 356 | 12 | 33     | 14.936    | P          | 0.200   | -0.061 |        |
| FUR  | 2005 | 356 | 12 | 33     | 15.831    | P          | 0.200   | 0.330  |        |
| PACP | 2005 | 356 | 12 | 33     | 15.910    | P          | 0.200   | 0.480  |        |
| SN22 | 2005 | 356 | 12 | 33     | 15.968    | P          | 0.200   | -0.692 |        |
| T06C | 2005 | 356 | 12 | 33     | 15.994    | P          | 0.200   | -0.309 |        |
| SN14 | 2005 | 356 | 12 | 33     | 16.613    | P          | 0.200   | -1.228 |        |
| SN23 | 2005 | 356 | 12 | 33     | 16.769    | P          | 0.200   | -0.648 |        |
| MHC  | 2005 | 356 | 12 | 33     | 17.191    | P          | 0.200   | 0.310  |        |
| S05C | 2005 | 356 | 12 | 33     | 17.424    | P          | 0.200   | 0.007  |        |
| SN51 | 2005 | 356 | 12 | 33     | 17.507    | P          | 0.200   | 0.395  |        |
| TIN  | 2005 | 356 | 12 | 33     | 17.620    | P          | 0.200   | 0.103  |        |
| SN52 | 2005 | 356 | 12 | 33     | 17.705    | P          | 0.200   | -0.018 |        |
| GRA  | 2005 | 356 | 12 | 33     | 17.826    | P          | 0.200   | 0.102  |        |
| S04C | 2005 | 356 | 12 | 33     | 17.949    | P          | 0.200   | 0.367  |        |
| SN71 | 2005 | 356 | 12 | 33     | 18.325    | P          | 0.200   | -0.259 |        |
| SN15 | 2005 | 356 | 12 | 33     | 18.449    | P          | 0.200   | 0.010  |        |
| SN62 | 2005 | 356 | 12 | 33     | 18.508    | P          | 0.200   | -0.260 |        |
| SN25 | 2005 | 356 | 12 | 33     | 18.550    | P          | 0.200   | -0.230 |        |
| SN34 | 2005 | 356 | 12 | 33     | 18.623    | P          | 0.200   | -0.102 |        |
| SN43 | 2005 | 356 | 12 | 33     | 18.718    | P          | 0.200   | 0.259  |        |
| SN53 | 2005 | 356 | 12 | 33     | 18.813    | P          | 0.200   | 0.111  |        |
| TPNV | 2005 | 356 | 12 | 33     | 18.887    | P          | 0.200   | 0.552  |        |

|      |      |     |    |    |        |   |       |        |
|------|------|-----|----|----|--------|---|-------|--------|
| SN44 | 2005 | 356 | 12 | 33 | 19.137 | P | 0.200 | 0.231  |
| SN73 | 2005 | 356 | 12 | 33 | 19.762 | P | 0.200 | 0.001  |
| SN26 | 2005 | 356 | 12 | 33 | 19.847 | P | 0.200 | 0.140  |
| SN54 | 2005 | 356 | 12 | 33 | 20.163 | P | 0.200 | 0.298  |
| S06C | 2005 | 356 | 12 | 33 | 20.177 | P | 0.200 | -0.143 |
| SN45 | 2005 | 356 | 12 | 33 | 20.180 | P | 0.200 | 0.158  |
| SN36 | 2005 | 356 | 12 | 33 | 20.400 | P | 0.200 | 0.167  |
| CMB  | 2005 | 356 | 12 | 33 | 20.513 | P | 0.200 | -0.006 |
| SN55 | 2005 | 356 | 12 | 33 | 20.970 | P | 0.200 | 0.204  |
| SN75 | 2005 | 356 | 12 | 33 | 21.030 | P | 0.200 | -0.693 |
| SN37 | 2005 | 356 | 12 | 33 | 21.267 | P | 0.200 | 0.432  |
| SN28 | 2005 | 356 | 12 | 33 | 21.720 | P | 0.200 | 0.331  |
| SN47 | 2005 | 356 | 12 | 33 | 21.789 | P | 0.200 | 0.311  |
| SN38 | 2005 | 356 | 12 | 33 | 22.295 | P | 0.200 | 0.383  |
| SN57 | 2005 | 356 | 12 | 33 | 22.481 | P | 0.200 | 0.466  |
| SN48 | 2005 | 356 | 12 | 33 | 22.498 | P | 0.200 | 0.072  |
| SN76 | 2005 | 356 | 12 | 33 | 22.790 | P | 0.200 | 0.015  |
| SN86 | 2005 | 356 | 12 | 33 | 23.262 | P | 0.200 | 0.026  |
| LAVA | 2005 | 356 | 12 | 33 | 23.378 | P | 0.200 | -0.141 |
| MNV  | 2005 | 356 | 12 | 33 | 23.887 | P | 0.200 | 0.181  |
| R06C | 2005 | 356 | 12 | 33 | 23.903 | P | 0.200 | 0.529  |
| SUTB | 2005 | 356 | 12 | 33 | 24.625 | P | 0.200 | -0.500 |
| P05C | 2005 | 356 | 12 | 33 | 26.117 | P | 0.200 | -0.001 |
| ORV  | 2005 | 356 | 12 | 33 | 26.834 | P | 0.200 | 0.136  |
| GASB | 2005 | 356 | 12 | 33 | 27.448 | P | 0.200 | 0.866  |
| O04C | 2005 | 356 | 12 | 33 | 30.128 | P | 0.200 | -0.242 |

|      |     |    |   |         |           |            |         |   |        |
|------|-----|----|---|---------|-----------|------------|---------|---|--------|
| 2005 | 192 | 12 | 1 | 36.4023 | -23.81800 | -111.68000 | 10.0000 | 8 | -0.002 |
|------|-----|----|---|---------|-----------|------------|---------|---|--------|

|      |      |     |    |    |        |   |       |        |
|------|------|-----|----|----|--------|---|-------|--------|
| FMP  | 2005 | 192 | 12 | 11 | 25.787 | P | 0.200 | -0.121 |
| LGU  | 2005 | 192 | 12 | 11 | 29.127 | P | 0.200 | -0.101 |
| BFS  | 2005 | 192 | 12 | 11 | 29.215 | P | 0.200 | -0.044 |
| BBR  | 2005 | 192 | 12 | 11 | 29.480 | P | 0.200 | 0.438  |
| SBC  | 2005 | 192 | 12 | 11 | 32.013 | P | 0.200 | -0.004 |
| OSI  | 2005 | 192 | 12 | 11 | 32.263 | P | 0.200 | -0.244 |
| HEC  | 2005 | 192 | 12 | 11 | 32.860 | P | 0.200 | 0.290  |
| RRX  | 2005 | 192 | 12 | 11 | 33.179 | P | 0.200 | -0.025 |
| EDW2 | 2005 | 192 | 12 | 11 | 33.534 | P | 0.200 | -0.337 |
| MPP  | 2005 | 192 | 12 | 11 | 35.274 | P | 0.200 | -0.146 |
| ARV  | 2005 | 192 | 12 | 11 | 36.019 | P | 0.200 | 0.049  |
| GSC  | 2005 | 192 | 12 | 11 | 36.270 | P | 0.200 | 0.189  |
| TUQ  | 2005 | 192 | 12 | 11 | 37.011 | P | 0.200 | 0.436  |
| LRL  | 2005 | 192 | 12 | 11 | 37.851 | P | 0.200 | 0.091  |
| SMM  | 2005 | 192 | 12 | 11 | 38.491 | P | 0.200 | 0.127  |
| ISA  | 2005 | 192 | 12 | 11 | 39.831 | P | 0.200 | 0.223  |
| SHO  | 2005 | 192 | 12 | 11 | 40.012 | P | 0.200 | 0.197  |
| VES  | 2005 | 192 | 12 | 11 | 40.891 | P | 0.200 | -0.296 |
| V04C | 2005 | 192 | 12 | 11 | 41.266 | P | 0.200 | -0.140 |
| MPM  | 2005 | 192 | 12 | 11 | 41.844 | P | 0.200 | 0.047  |
| V05C | 2005 | 192 | 12 | 11 | 42.519 | P | 0.200 | 0.470  |
| PKD  | 2005 | 192 | 12 | 11 | 42.906 | P | 0.200 | -0.295 |
| RCT  | 2005 | 192 | 12 | 11 | 43.614 | P | 0.200 | -0.847 |
| FUR  | 2005 | 192 | 12 | 11 | 44.233 | P | 0.200 | 0.345  |
| V03C | 2005 | 192 | 12 | 11 | 44.367 | P | 0.200 | 0.125  |
| CWC  | 2005 | 192 | 12 | 11 | 45.059 | P | 0.200 | 0.353  |
| U05C | 2005 | 192 | 12 | 11 | 45.424 | P | 0.200 | 0.115  |
| SN11 | 2005 | 192 | 12 | 11 | 45.977 | P | 0.200 | -1.045 |
| HELL | 2005 | 192 | 12 | 11 | 46.383 | P | 0.200 | -0.526 |
| HAST | 2005 | 192 | 12 | 11 | 46.991 | P | 0.200 | -0.056 |
| GRA  | 2005 | 192 | 12 | 11 | 48.497 | P | 0.200 | 0.632  |
| T06C | 2005 | 192 | 12 | 11 | 48.604 | P | 0.200 | -0.903 |
| TIN  | 2005 | 192 | 12 | 11 | 49.211 | P | 0.200 | 0.330  |
| SAO  | 2005 | 192 | 12 | 11 | 49.304 | P | 0.200 | -0.105 |
| SN23 | 2005 | 192 | 12 | 11 | 49.408 | P | 0.200 | -0.791 |



|      |      |     |    |    |        |   |       |        |
|------|------|-----|----|----|--------|---|-------|--------|
| T05C | 2005 | 192 | 12 | 11 | 50.013 | P | 0.200 | 0.451  |
| SN42 | 2005 | 192 | 12 | 11 | 50.406 | P | 0.200 | -0.805 |
| PACP | 2005 | 192 | 12 | 11 | 51.075 | P | 0.200 | 0.083  |
| SN51 | 2005 | 192 | 12 | 11 | 51.431 | P | 0.200 | -0.106 |
| SN52 | 2005 | 192 | 12 | 11 | 51.435 | P | 0.200 | -0.451 |
| S05C | 2005 | 192 | 12 | 11 | 52.177 | P | 0.200 | -0.107 |
| BNLO | 2005 | 192 | 12 | 11 | 52.309 | P | 0.200 | -0.480 |
| SN26 | 2005 | 192 | 12 | 11 | 52.807 | P | 0.200 | 0.185  |
| SN53 | 2005 | 192 | 12 | 11 | 52.919 | P | 0.200 | -0.130 |
| SN62 | 2005 | 192 | 12 | 11 | 53.475 | P | 0.200 | -0.231 |
| SN71 | 2005 | 192 | 12 | 11 | 54.210 | P | 0.200 | -0.124 |
| JRSC | 2005 | 192 | 12 | 11 | 54.280 | P | 0.200 | -0.057 |
| S04C | 2005 | 192 | 12 | 11 | 54.515 | P | 0.200 | 0.289  |
| SN37 | 2005 | 192 | 12 | 11 | 54.534 | P | 0.200 | 0.215  |
| SN28 | 2005 | 192 | 12 | 11 | 54.868 | P | 0.200 | 0.297  |
| TPH  | 2005 | 192 | 12 | 11 | 55.675 | P | 0.200 | 0.547  |
| WENL | 2005 | 192 | 12 | 11 | 55.796 | P | 0.200 | 0.501  |
| SN47 | 2005 | 192 | 12 | 11 | 55.896 | P | 0.200 | 0.359  |
| SN38 | 2005 | 192 | 12 | 11 | 55.975 | P | 0.200 | 0.292  |
| CMB  | 2005 | 192 | 12 | 11 | 56.999 | P | 0.200 | -0.066 |
| SN48 | 2005 | 192 | 12 | 11 | 57.143 | P | 0.200 | 0.474  |
| SN57 | 2005 | 192 | 12 | 11 | 57.345 | P | 0.200 | 0.519  |
| SN67 | 2005 | 192 | 12 | 11 | 58.447 | P | 0.200 | 0.655  |
| R04C | 2005 | 192 | 12 | 11 | 59.035 | P | 0.200 | 0.237  |
| CVS  | 2005 | 192 | 12 | 12 | 0.539  | P | 0.200 | -0.331 |
| LAVA | 2005 | 192 | 12 | 12 | 1.942  | P | 0.200 | -0.080 |
| Q03C | 2005 | 192 | 12 | 12 | 3.036  | P | 0.200 | 0.690  |
| Q04C | 2005 | 192 | 12 | 12 | 3.191  | P | 0.200 | 0.127  |
| MNRC | 2005 | 192 | 12 | 12 | 4.649  | P | 0.200 | 0.298  |
| SUTB | 2005 | 192 | 12 | 12 | 5.503  | P | 0.200 | -0.434 |
| P05C | 2005 | 192 | 12 | 12 | 5.716  | P | 0.200 | 0.185  |
| HOPS | 2005 | 192 | 12 | 12 | 5.879  | P | 0.200 | 0.214  |
| ORV  | 2005 | 192 | 12 | 12 | 7.908  | P | 0.200 | 0.129  |
| O05C | 2005 | 192 | 12 | 12 | 10.352 | P | 0.200 | 0.244  |
| O03C | 2005 | 192 | 12 | 12 | 10.743 | P | 0.200 | -0.417 |
| O04C | 2005 | 192 | 12 | 12 | 12.502 | P | 0.200 | -0.001 |
| ELFS | 2005 | 192 | 12 | 12 | 14.384 | P | 0.200 | 0.079  |
| WDC  | 2005 | 192 | 12 | 12 | 14.599 | P | 0.200 | -0.760 |
| HATC | 2005 | 192 | 12 | 12 | 15.848 | P | 0.200 | -0.180 |
| M06C | 2005 | 192 | 12 | 12 | 17.802 | P | 0.200 | 0.097  |
| JCC  | 2005 | 192 | 12 | 12 | 18.438 | P | 0.200 | 0.063  |
| YBH  | 2005 | 192 | 12 | 12 | 22.208 | P | 0.200 | -0.753 |
| HUMO | 2005 | 192 | 12 | 12 | 28.363 | P | 0.200 | -0.207 |
| DBO  | 2005 | 192 | 12 | 12 | 32.101 | P | 0.200 | 0.062  |

|      |      |     |    |         |           |            |         |        |        |
|------|------|-----|----|---------|-----------|------------|---------|--------|--------|
| 2006 | 144  | 0   | 32 | 34.0921 | -27.56500 | -112.79300 | 10.0000 | 131    | -0.012 |
| CHF  | 2006 | 144 | 0  | 42      | 52.731    | P          | 0.200   | 0.100  |        |
| HEC  | 2006 | 144 | 0  | 42      | 55.383    | P          | 0.200   | 0.142  |        |
| EDW2 | 2006 | 144 | 0  | 42      | 55.821    | P          | 0.200   | -0.440 |        |
| MPP  | 2006 | 144 | 0  | 42      | 57.329    | P          | 0.200   | -0.142 |        |
| GSC  | 2006 | 144 | 0  | 42      | 58.749    | P          | 0.200   | 0.203  |        |
| TUQ  | 2006 | 144 | 0  | 42      | 59.593    | P          | 0.200   | 0.435  |        |
| LRL  | 2006 | 144 | 0  | 43      | 0.044     | P          | 0.200   | 0.003  |        |
| SHO  | 2006 | 144 | 0  | 43      | 2.473     | P          | 0.200   | 0.247  |        |
| VES  | 2006 | 144 | 0  | 43      | 2.806     | P          | 0.200   | -0.317 |        |
| V04C | 2006 | 144 | 0  | 43      | 2.897     | P          | 0.200   | -0.169 |        |
| MPM  | 2006 | 144 | 0  | 43      | 3.976     | P          | 0.200   | 0.016  |        |
| V05C | 2006 | 144 | 0  | 43      | 4.280     | P          | 0.200   | 0.447  |        |
| PKD  | 2006 | 144 | 0  | 43      | 4.530     | P          | 0.200   | -0.315 |        |
| RCT  | 2006 | 144 | 0  | 43      | 5.391     | P          | 0.200   | -0.881 |        |
| FUR  | 2006 | 144 | 0  | 43      | 6.361     | P          | 0.200   | 0.310  |        |
| CWC  | 2006 | 144 | 0  | 43      | 6.901     | P          | 0.200   | 0.200  |        |
| U05C | 2006 | 144 | 0  | 43      | 6.987     | P          | 0.200   | 0.031  |        |

|      |      |     |   |    |        |   |       |        |
|------|------|-----|---|----|--------|---|-------|--------|
| SN11 | 2006 | 144 | 0 | 43 | 7.499  | P | 0.200 | -1.234 |
| HELL | 2006 | 144 | 0 | 43 | 7.909  | P | 0.200 | -0.780 |
| U04C | 2006 | 144 | 0 | 43 | 8.072  | P | 0.200 | 0.450  |
| HAST | 2006 | 144 | 0 | 43 | 8.321  | P | 0.200 | -0.095 |
| SN21 | 2006 | 144 | 0 | 43 | 8.454  | P | 0.200 | -1.241 |
| TPNV | 2006 | 144 | 0 | 43 | 9.957  | P | 0.200 | 0.797  |
| T06C | 2006 | 144 | 0 | 43 | 10.133 | P | 0.200 | -0.957 |
| GRA  | 2006 | 144 | 0 | 43 | 10.316 | P | 0.200 | 0.485  |
| SAO  | 2006 | 144 | 0 | 43 | 10.416 | P | 0.200 | -0.308 |
| TIN  | 2006 | 144 | 0 | 43 | 10.879 | P | 0.200 | 0.181  |
| SN23 | 2006 | 144 | 0 | 43 | 10.895 | P | 0.200 | -0.946 |
| SN15 | 2006 | 144 | 0 | 43 | 12.465 | P | 0.200 | -0.134 |
| SN25 | 2006 | 144 | 0 | 43 | 12.794 | P | 0.200 | -0.331 |
| SN16 | 2006 | 144 | 0 | 43 | 12.861 | P | 0.200 | 0.103  |
| SN51 | 2006 | 144 | 0 | 43 | 12.892 | P | 0.200 | -0.081 |
| SN52 | 2006 | 144 | 0 | 43 | 12.917 | P | 0.200 | -0.442 |
| S05C | 2006 | 144 | 0 | 43 | 13.418 | P | 0.200 | -0.249 |
| BNLO | 2006 | 144 | 0 | 43 | 13.455 | P | 0.200 | -0.407 |
| SN44 | 2006 | 144 | 0 | 43 | 13.767 | P | 0.200 | -0.505 |
| S08C | 2006 | 144 | 0 | 43 | 14.136 | P | 0.200 | 0.386  |
| SN26 | 2006 | 144 | 0 | 43 | 14.407 | P | 0.200 | 0.141  |
| MHC  | 2006 | 144 | 0 | 43 | 14.930 | P | 0.200 | 0.164  |
| S09A | 2006 | 144 | 0 | 43 | 14.984 | P | 0.200 | 0.407  |
| SN36 | 2006 | 144 | 0 | 43 | 15.056 | P | 0.200 | -0.136 |
| SN71 | 2006 | 144 | 0 | 43 | 15.319 | P | 0.200 | -0.300 |
| S04C | 2006 | 144 | 0 | 43 | 15.588 | P | 0.200 | 0.198  |
| SN54 | 2006 | 144 | 0 | 43 | 15.917 | P | 0.200 | 0.013  |
| SN37 | 2006 | 144 | 0 | 43 | 15.966 | P | 0.200 | 0.067  |
| SN28 | 2006 | 144 | 0 | 43 | 16.391 | P | 0.200 | 0.200  |
| SN73 | 2006 | 144 | 0 | 43 | 16.542 | P | 0.200 | -0.191 |
| SN55 | 2006 | 144 | 0 | 43 | 16.888 | P | 0.200 | 0.050  |
| SN64 | 2006 | 144 | 0 | 43 | 16.977 | P | 0.200 | 0.081  |
| SN47 | 2006 | 144 | 0 | 43 | 17.258 | P | 0.200 | 0.208  |
| SN38 | 2006 | 144 | 0 | 43 | 17.480 | P | 0.200 | 0.242  |
| CMB  | 2006 | 144 | 0 | 43 | 18.120 | P | 0.200 | -0.150 |
| BRK  | 2006 | 144 | 0 | 43 | 18.314 | P | 0.200 | -0.090 |
| R07C | 2006 | 144 | 0 | 43 | 18.323 | P | 0.200 | 0.412  |
| SN48 | 2006 | 144 | 0 | 43 | 18.537 | P | 0.200 | 0.369  |
| BRIB | 2006 | 144 | 0 | 43 | 18.614 | P | 0.200 | -0.151 |
| SN57 | 2006 | 144 | 0 | 43 | 18.679 | P | 0.200 | 0.423  |
| SN84 | 2006 | 144 | 0 | 43 | 18.744 | P | 0.200 | -0.227 |
| SN66 | 2006 | 144 | 0 | 43 | 19.217 | P | 0.200 | 0.468  |
| R08A | 2006 | 144 | 0 | 43 | 19.274 | P | 0.200 | 0.175  |
| SN67 | 2006 | 144 | 0 | 43 | 19.668 | P | 0.200 | 0.504  |
| MNV  | 2006 | 144 | 0 | 43 | 19.732 | P | 0.200 | 0.152  |
| SN76 | 2006 | 144 | 0 | 43 | 20.176 | P | 0.200 | 0.198  |
| R06C | 2006 | 144 | 0 | 43 | 21.316 | P | 0.200 | 0.410  |
| Q08A | 2006 | 144 | 0 | 43 | 22.265 | P | 0.200 | 0.058  |
| Q09A | 2006 | 144 | 0 | 43 | 22.496 | P | 0.200 | 0.738  |
| R05C | 2006 | 144 | 0 | 43 | 22.629 | P | 0.200 | 0.051  |
| LAVA | 2006 | 144 | 0 | 43 | 22.834 | P | 0.200 | -0.180 |
| Q07A | 2006 | 144 | 0 | 43 | 23.569 | P | 0.200 | 0.475  |
| Q04C | 2006 | 144 | 0 | 43 | 23.953 | P | 0.200 | 0.023  |
| WCN  | 2006 | 144 | 0 | 43 | 26.180 | P | 0.200 | 0.133  |
| P09A | 2006 | 144 | 0 | 43 | 26.343 | P | 0.200 | -0.026 |
| P05C | 2006 | 144 | 0 | 43 | 26.454 | P | 0.200 | 0.028  |
| P07A | 2006 | 144 | 0 | 43 | 27.518 | P | 0.200 | 0.581  |
| P08A | 2006 | 144 | 0 | 43 | 27.867 | P | 0.200 | 0.338  |
| ORV  | 2006 | 144 | 0 | 43 | 28.486 | P | 0.200 | 0.022  |
| P06A | 2006 | 144 | 0 | 43 | 28.633 | P | 0.200 | 0.175  |
| BEK  | 2006 | 144 | 0 | 43 | 29.837 | P | 0.200 | -0.063 |
| O09A | 2006 | 144 | 0 | 43 | 30.361 | P | 0.200 | 0.162  |
| O05C | 2006 | 144 | 0 | 43 | 30.885 | P | 0.200 | 0.102  |

|      |      |     |   |    |        |   |       |        |
|------|------|-----|---|----|--------|---|-------|--------|
| GASB | 2006 | 144 | 0 | 43 | 31.027 | P | 0.200 | 0.905  |
| O07A | 2006 | 144 | 0 | 43 | 31.119 | P | 0.200 | 0.248  |
| O06A | 2006 | 144 | 0 | 43 | 31.440 | P | 0.200 | 0.069  |
| O04C | 2006 | 144 | 0 | 43 | 33.024 | P | 0.200 | -0.047 |
| O02C | 2006 | 144 | 0 | 43 | 33.621 | P | 0.200 | 0.166  |
| N08A | 2006 | 144 | 0 | 43 | 34.703 | P | 0.200 | 0.266  |
| WDC  | 2006 | 144 | 0 | 43 | 34.766 | P | 0.200 | -0.856 |
| N07B | 2006 | 144 | 0 | 43 | 34.923 | P | 0.200 | 0.231  |
| N02C | 2006 | 144 | 0 | 43 | 37.855 | P | 0.200 | -0.034 |
| M06C | 2006 | 144 | 0 | 43 | 38.066 | P | 0.200 | -0.091 |
| M07A | 2006 | 144 | 0 | 43 | 38.791 | P | 0.200 | 0.154  |
| M03C | 2006 | 144 | 0 | 43 | 38.918 | P | 0.200 | -0.802 |
| M05C | 2006 | 144 | 0 | 43 | 39.029 | P | 0.200 | -0.514 |
| M02C | 2006 | 144 | 0 | 43 | 40.879 | P | 0.200 | -0.115 |
| M04C | 2006 | 144 | 0 | 43 | 42.325 | P | 0.200 | -0.395 |

|      |      |     |    |         |           |            |         |        |       |
|------|------|-----|----|---------|-----------|------------|---------|--------|-------|
| 2006 | 279  | 16  | 25 | 30.5789 | -50.10500 | -114.59800 | 10.0000 | 228    | 0.005 |
| SVD  | 2006 | 279 | 16 | 38      | 0.223     | P          | 0.200   | 0.339  |       |
| BFS  | 2006 | 279 | 16 | 38      | 0.466     | P          | 0.200   | -0.216 |       |
| MWC  | 2006 | 279 | 16 | 38      | 0.801     | P          | 0.200   | 0.059  |       |
| CHF  | 2006 | 279 | 16 | 38      | 1.250     | P          | 0.200   | 0.077  |       |
| VCS  | 2006 | 279 | 16 | 38      | 1.822     | P          | 0.200   | -0.158 |       |
| HEC  | 2006 | 279 | 16 | 38      | 3.692     | P          | 0.200   | 0.231  |       |
| EDW2 | 2006 | 279 | 16 | 38      | 3.748     | P          | 0.200   | -0.143 |       |
| MPP  | 2006 | 279 | 16 | 38      | 4.246     | P          | 0.200   | -0.144 |       |
| ARV  | 2006 | 279 | 16 | 38      | 5.022     | P          | 0.200   | -0.047 |       |
| GSC  | 2006 | 279 | 16 | 38      | 6.095     | P          | 0.200   | 0.209  |       |
| TUQ  | 2006 | 279 | 16 | 38      | 6.840     | P          | 0.200   | 0.341  |       |
| PHL  | 2006 | 279 | 16 | 38      | 6.914     | P          | 0.200   | -0.192 |       |
| LRL  | 2006 | 279 | 16 | 38      | 6.934     | P          | 0.200   | 0.124  |       |
| ISA  | 2006 | 279 | 16 | 38      | 8.016     | P          | 0.200   | 0.110  |       |
| V11A | 2006 | 279 | 16 | 38      | 8.562     | P          | 0.200   | 0.187  |       |
| SHO  | 2006 | 279 | 16 | 38      | 8.661     | P          | 0.200   | -0.040 |       |
| SLA  | 2006 | 279 | 16 | 38      | 9.018     | P          | 0.200   | 0.095  |       |
| PKD  | 2006 | 279 | 16 | 38      | 9.664     | P          | 0.200   | -0.054 |       |
| MPM  | 2006 | 279 | 16 | 38      | 9.917     | P          | 0.200   | 0.090  |       |
| FUR  | 2006 | 279 | 16 | 38      | 11.803    | P          | 0.200   | 0.403  |       |
| CWC  | 2006 | 279 | 16 | 38      | 11.875    | P          | 0.200   | 0.070  |       |
| U10A | 2006 | 279 | 16 | 38      | 11.922    | P          | 0.200   | 0.557  |       |
| HAST | 2006 | 279 | 16 | 38      | 12.123    | P          | 0.200   | 0.005  |       |
| U04C | 2006 | 279 | 16 | 38      | 12.124    | P          | 0.200   | 0.396  |       |
| HELL | 2006 | 279 | 16 | 38      | 12.160    | P          | 0.200   | -0.853 |       |
| GRA  | 2006 | 279 | 16 | 38      | 14.534    | P          | 0.200   | 0.320  |       |
| PACP | 2006 | 279 | 16 | 38      | 15.242    | P          | 0.200   | 0.115  |       |
| BNLO | 2006 | 279 | 16 | 38      | 15.652    | P          | 0.200   | -0.402 |       |
| SN43 | 2006 | 279 | 16 | 38      | 16.683    | P          | 0.200   | -0.118 |       |
| S08C | 2006 | 279 | 16 | 38      | 17.259    | P          | 0.200   | 0.238  |       |
| S04C | 2006 | 279 | 16 | 38      | 17.472    | P          | 0.200   | 0.053  |       |
| MLAC | 2006 | 279 | 16 | 38      | 17.790    | P          | 0.200   | 0.172  |       |
| S09A | 2006 | 279 | 16 | 38      | 17.954    | P          | 0.200   | 0.198  |       |
| S06C | 2006 | 279 | 16 | 38      | 18.732    | P          | 0.200   | -0.318 |       |
| CMB  | 2006 | 279 | 16 | 38      | 19.577    | P          | 0.200   | -0.228 |       |
| TPH  | 2006 | 279 | 16 | 38      | 19.814    | P          | 0.200   | 0.376  |       |
| R07C | 2006 | 279 | 16 | 38      | 20.249    | P          | 0.200   | 0.360  |       |
| SN93 | 2006 | 279 | 16 | 38      | 20.387    | P          | 0.200   | 0.172  |       |
| SNA3 | 2006 | 279 | 16 | 38      | 21.593    | P          | 0.200   | 0.113  |       |
| R09A | 2006 | 279 | 16 | 38      | 20.626    | P          | 0.200   | 0.325  |       |
| R10A | 2006 | 279 | 16 | 38      | 20.690    | P          | 0.200   | 0.259  |       |
| SNA4 | 2006 | 279 | 16 | 38      | 21.960    | P          | 0.200   | -0.120 |       |
| R08A | 2006 | 279 | 16 | 38      | 21.019    | P          | 0.200   | 0.060  |       |
| SNB3 | 2006 | 279 | 16 | 38      | 22.258    | P          | 0.200   | -0.098 |       |
| SN96 | 2006 | 279 | 16 | 38      | 22.020    | P          | 0.200   | 0.010  |       |
| R06C | 2006 | 279 | 16 | 38      | 22.317    | P          | 0.200   | 0.349  |       |

|      |      |     |    |    |        |   |       |        |
|------|------|-----|----|----|--------|---|-------|--------|
| SNC4 | 2006 | 279 | 16 | 38 | 23.388 | P | 0.200 | -0.152 |
| SN97 | 2006 | 279 | 16 | 38 | 23.634 | P | 0.200 | 0.190  |
| LAVA | 2006 | 279 | 16 | 38 | 22.898 | P | 0.200 | -0.294 |
| R05C | 2006 | 279 | 16 | 38 | 23.045 | P | 0.200 | -0.080 |
| SNC5 | 2006 | 279 | 16 | 38 | 24.177 | P | 0.200 | -0.361 |
| Q08A | 2006 | 279 | 16 | 38 | 23.198 | P | 0.200 | -0.044 |
| Q11A | 2006 | 279 | 16 | 38 | 23.273 | P | 0.200 | 0.270  |
| Q09A | 2006 | 279 | 16 | 38 | 23.333 | P | 0.200 | 0.318  |
| SND5 | 2006 | 279 | 16 | 38 | 24.699 | P | 0.200 | -0.489 |
| SNC6 | 2006 | 279 | 16 | 38 | 24.742 | P | 0.200 | -0.031 |
| SNA8 | 2006 | 279 | 16 | 38 | 24.936 | P | 0.200 | 0.212  |
| SND4 | 2006 | 279 | 16 | 38 | 24.079 | P | 0.200 | -0.544 |
| SNE4 | 2006 | 279 | 16 | 38 | 25.305 | P | 0.200 | -0.296 |
| SNE5 | 2006 | 279 | 16 | 38 | 25.892 | P | 0.200 | -0.411 |
| SNC7 | 2006 | 279 | 16 | 38 | 25.978 | P | 0.200 | -0.012 |
| SUTB | 2006 | 279 | 16 | 38 | 25.095 | P | 0.200 | -0.567 |
| SNE6 | 2006 | 279 | 16 | 38 | 26.451 | P | 0.200 | -0.312 |
| WCN  | 2006 | 279 | 16 | 38 | 25.977 | P | 0.200 | 0.287  |
| P09A | 2006 | 279 | 16 | 38 | 26.237 | P | 0.200 | -0.188 |
| SND8 | 2006 | 279 | 16 | 38 | 27.404 | P | 0.200 | 0.018  |
| SNF6 | 2006 | 279 | 16 | 38 | 27.411 | P | 0.200 | -0.320 |
| SND7 | 2006 | 279 | 16 | 38 | 27.417 | P | 0.200 | 0.094  |
| SNG5 | 2006 | 279 | 16 | 38 | 27.751 | P | 0.200 | -0.192 |
| P10A | 2006 | 279 | 16 | 38 | 26.797 | P | 0.200 | 0.069  |
| ORV  | 2006 | 279 | 16 | 38 | 27.229 | P | 0.200 | 0.198  |
| SNE7 | 2006 | 279 | 16 | 38 | 28.285 | P | 0.200 | -0.005 |
| O05C | 2006 | 279 | 16 | 38 | 28.819 | P | 0.200 | -0.098 |
| GASB | 2006 | 279 | 16 | 38 | 28.961 | P | 0.200 | 1.004  |
| SNE9 | 2006 | 279 | 16 | 38 | 29.238 | P | 0.200 | 0.036  |
| O09A | 2006 | 279 | 16 | 38 | 29.323 | P | 0.200 | 0.105  |
| O07A | 2006 | 279 | 16 | 38 | 29.665 | P | 0.200 | 0.207  |
| SNF9 | 2006 | 279 | 16 | 38 | 29.709 | P | 0.200 | -0.173 |
| O06A | 2006 | 279 | 16 | 38 | 29.711 | P | 0.200 | 0.112  |
| O04C | 2006 | 279 | 16 | 38 | 30.222 | P | 0.200 | -0.347 |
| O02C | 2006 | 279 | 16 | 38 | 30.703 | P | 0.200 | 0.250  |
| WDC  | 2006 | 279 | 16 | 38 | 31.389 | P | 0.200 | -0.721 |
| N06A | 2006 | 279 | 16 | 38 | 32.217 | P | 0.200 | -0.044 |
| N08A | 2006 | 279 | 16 | 38 | 32.325 | P | 0.200 | 0.135  |
| N07B | 2006 | 279 | 16 | 38 | 32.349 | P | 0.200 | 0.129  |
| N02C | 2006 | 279 | 16 | 38 | 33.705 | P | 0.200 | 0.088  |
| M06C | 2006 | 279 | 16 | 38 | 34.466 | P | 0.200 | -0.026 |
| M03C | 2006 | 279 | 16 | 38 | 34.614 | P | 0.200 | -0.714 |
| M05C | 2006 | 279 | 16 | 38 | 34.990 | P | 0.200 | -0.391 |
| M07A | 2006 | 279 | 16 | 38 | 35.248 | P | 0.200 | 0.101  |
| M02C | 2006 | 279 | 16 | 38 | 35.980 | P | 0.200 | -0.068 |
| M04C | 2006 | 279 | 16 | 38 | 37.323 | P | 0.200 | -0.281 |
| L07A | 2006 | 279 | 16 | 38 | 38.585 | P | 0.200 | 0.512  |
| L05A | 2006 | 279 | 16 | 38 | 38.630 | P | 0.200 | -0.015 |
| L04A | 2006 | 279 | 16 | 38 | 38.890 | P | 0.200 | -0.496 |
| K05A | 2006 | 279 | 16 | 38 | 41.859 | P | 0.200 | 0.068  |
| K02A | 2006 | 279 | 16 | 38 | 42.489 | P | 0.200 | -0.001 |
| J05A | 2006 | 279 | 16 | 38 | 44.249 | P | 0.200 | -0.066 |
| J03A | 2006 | 279 | 16 | 38 | 45.032 | P | 0.200 | 0.055  |

|      |      |     |    |        |           |            |         |        |        |
|------|------|-----|----|--------|-----------|------------|---------|--------|--------|
| 2006 | 334  | 23  | 38 | 9.3675 | -29.76100 | -111.95800 | 10.0000 | 247    | -0.010 |
| SVD  | 2006 | 334 | 23 | 48     | 41.086    | P          | 0.200   | 0.244  |        |
| DJJ  | 2006 | 334 | 23 | 48     | 41.257    | P          | 0.200   | -0.327 |        |
| BFS  | 2006 | 334 | 23 | 48     | 41.780    | P          | 0.200   | -0.298 |        |
| MWC  | 2006 | 334 | 23 | 48     | 42.096    | P          | 0.200   | -0.157 |        |
| CHF  | 2006 | 334 | 23 | 48     | 42.795    | P          | 0.200   | -0.053 |        |
| VTV  | 2006 | 334 | 23 | 48     | 43.666    | P          | 0.200   | -0.320 |        |
| VCS  | 2006 | 334 | 23 | 48     | 43.675    | P          | 0.200   | -0.263 |        |
| OSI  | 2006 | 334 | 23 | 48     | 44.629    | P          | 0.200   | -0.421 |        |

|      |      |     |    |    |        |   |       |        |
|------|------|-----|----|----|--------|---|-------|--------|
| HEC  | 2006 | 334 | 23 | 48 | 45.431 | P | 0.200 | 0.141  |
| EDW2 | 2006 | 334 | 23 | 48 | 45.891 | P | 0.200 | -0.494 |
| MPP  | 2006 | 334 | 23 | 48 | 47.315 | P | 0.200 | -0.342 |
| ARV  | 2006 | 334 | 23 | 48 | 48.061 | P | 0.200 | -0.198 |
| GSC  | 2006 | 334 | 23 | 48 | 48.693 | P | 0.200 | 0.142  |
| TUQ  | 2006 | 334 | 23 | 48 | 49.467 | P | 0.200 | 0.374  |
| LRL  | 2006 | 334 | 23 | 48 | 49.999 | P | 0.200 | -0.058 |
| ISA  | 2006 | 334 | 23 | 48 | 51.652 | P | 0.200 | -0.081 |
| V11A | 2006 | 334 | 23 | 48 | 52.009 | P | 0.200 | 0.594  |
| SHO  | 2006 | 334 | 23 | 48 | 52.239 | P | 0.200 | 0.144  |
| SLA  | 2006 | 334 | 23 | 48 | 52.605 | P | 0.200 | 0.015  |
| VES  | 2006 | 334 | 23 | 48 | 52.605 | P | 0.200 | -0.532 |
| MPM  | 2006 | 334 | 23 | 48 | 53.874 | P | 0.200 | -0.002 |
| PKD  | 2006 | 334 | 23 | 48 | 54.406 | P | 0.200 | -0.484 |
| RCT  | 2006 | 334 | 23 | 48 | 55.216 | P | 0.200 | -1.000 |
| U11A | 2006 | 334 | 23 | 48 | 55.704 | P | 0.200 | 0.451  |
| U10A | 2006 | 334 | 23 | 48 | 56.096 | P | 0.200 | 0.563  |
| CWC  | 2006 | 334 | 23 | 48 | 56.710 | P | 0.200 | 0.133  |
| HELL | 2006 | 334 | 23 | 48 | 57.762 | P | 0.200 | -0.791 |
| U04C | 2006 | 334 | 23 | 48 | 57.883 | P | 0.200 | 0.286  |
| HAST | 2006 | 334 | 23 | 48 | 58.095 | P | 0.200 | -0.311 |
| T06C | 2006 | 334 | 23 | 48 | 59.954 | P | 0.200 | -0.967 |
| GRA  | 2006 | 334 | 23 | 49 | 0.100  | P | 0.200 | 0.517  |
| SAO  | 2006 | 334 | 23 | 49 | 0.223  | P | 0.200 | -0.424 |
| TIN  | 2006 | 334 | 23 | 49 | 0.739  | P | 0.200 | 0.267  |
| PACP | 2006 | 334 | 23 | 49 | 2.179  | P | 0.200 | 0.029  |
| SN43 | 2006 | 334 | 23 | 49 | 3.266  | P | 0.200 | -0.356 |
| BNLO | 2006 | 334 | 23 | 49 | 3.163  | P | 0.200 | -0.570 |
| S05C | 2006 | 334 | 23 | 49 | 3.248  | P | 0.200 | -0.208 |
| S08C | 2006 | 334 | 23 | 49 | 3.818  | P | 0.200 | 0.371  |
| MLAC | 2006 | 334 | 23 | 49 | 4.548  | P | 0.200 | 0.076  |
| S09A | 2006 | 334 | 23 | 49 | 4.589  | P | 0.200 | 0.402  |
| S04C | 2006 | 334 | 23 | 49 | 5.266  | P | 0.200 | 0.092  |
| S06C | 2006 | 334 | 23 | 49 | 6.679  | P | 0.200 | 0.026  |
| TPH  | 2006 | 334 | 23 | 49 | 6.841  | P | 0.200 | 0.444  |
| CMB  | 2006 | 334 | 23 | 49 | 7.834  | P | 0.200 | -0.111 |
| BRK  | 2006 | 334 | 23 | 49 | 7.846  | P | 0.200 | -0.296 |
| R09A | 2006 | 334 | 23 | 49 | 7.960  | P | 0.200 | 0.504  |
| R07C | 2006 | 334 | 23 | 49 | 7.988  | P | 0.200 | 0.460  |
| R10A | 2006 | 334 | 23 | 49 | 8.074  | P | 0.200 | 0.627  |
| BRIB | 2006 | 334 | 23 | 49 | 8.437  | P | 0.200 | -0.058 |
| BDM  | 2006 | 334 | 23 | 49 | 8.723  | P | 0.200 | 0.308  |
| R08A | 2006 | 334 | 23 | 49 | 8.760  | P | 0.200 | 0.113  |
| SN93 | 2006 | 334 | 23 | 49 | 8.967  | P | 0.200 | 0.327  |
| R04C | 2006 | 334 | 23 | 49 | 9.598  | P | 0.200 | 0.097  |
| SNA3 | 2006 | 334 | 23 | 49 | 10.662 | P | 0.200 | 0.359  |
| SNA4 | 2006 | 334 | 23 | 49 | 10.831 | P | 0.200 | -0.173 |
| SNB3 | 2006 | 334 | 23 | 49 | 11.419 | P | 0.200 | -0.067 |
| SN96 | 2006 | 334 | 23 | 49 | 10.791 | P | 0.200 | 0.184  |
| R06C | 2006 | 334 | 23 | 49 | 10.920 | P | 0.200 | 0.458  |
| CVS  | 2006 | 334 | 23 | 49 | 10.967 | P | 0.200 | -0.346 |
| Q11A | 2006 | 334 | 23 | 49 | 11.446 | P | 0.200 | 0.730  |
| SN97 | 2006 | 334 | 23 | 49 | 12.807 | P | 0.200 | 0.339  |
| SNB5 | 2006 | 334 | 23 | 49 | 12.838 | P | 0.200 | -0.256 |
| Q08A | 2006 | 334 | 23 | 49 | 11.908 | P | 0.200 | 0.262  |
| Q09A | 2006 | 334 | 23 | 49 | 11.912 | P | 0.200 | 0.738  |
| SNC4 | 2006 | 334 | 23 | 49 | 13.054 | P | 0.200 | -0.084 |
| R05C | 2006 | 334 | 23 | 49 | 12.170 | P | 0.200 | 0.051  |
| LAVA | 2006 | 334 | 23 | 49 | 12.434 | P | 0.200 | -0.126 |
| SNC5 | 2006 | 334 | 23 | 49 | 13.819 | P | 0.200 | -0.486 |
| SNA7 | 2006 | 334 | 23 | 49 | 14.289 | P | 0.200 | 0.416  |
| Q03C | 2006 | 334 | 23 | 49 | 13.426 | P | 0.200 | 0.699  |
| SNA8 | 2006 | 334 | 23 | 49 | 14.455 | P | 0.200 | 0.319  |

|      |      |     |    |    |        |   |       |        |
|------|------|-----|----|----|--------|---|-------|--------|
| Q04C | 2006 | 334 | 23 | 49 | 13.503 | P | 0.200 | 0.030  |
| SND5 | 2006 | 334 | 23 | 49 | 14.812 | P | 0.200 | -0.477 |
| SND4 | 2006 | 334 | 23 | 49 | 14.269 | P | 0.200 | -0.285 |
| SNE4 | 2006 | 334 | 23 | 49 | 15.564 | P | 0.200 | -0.373 |
| MNRC | 2006 | 334 | 23 | 49 | 14.672 | P | 0.200 | 0.092  |
| SNC7 | 2006 | 334 | 23 | 49 | 15.985 | P | 0.200 | -0.072 |
| SNE5 | 2006 | 334 | 23 | 49 | 16.282 | P | 0.200 | -0.478 |
| SUTB | 2006 | 334 | 23 | 49 | 15.645 | P | 0.200 | -0.511 |
| P09A | 2006 | 334 | 23 | 49 | 15.687 | P | 0.200 | 0.021  |
| SNE6 | 2006 | 334 | 23 | 49 | 16.739 | P | 0.200 | -0.452 |
| HOPS | 2006 | 334 | 23 | 49 | 15.748 | P | 0.200 | 0.009  |
| WCN  | 2006 | 334 | 23 | 49 | 15.810 | P | 0.200 | 0.335  |
| P05C | 2006 | 334 | 23 | 49 | 15.957 | P | 0.200 | 0.077  |
| SND8 | 2006 | 334 | 23 | 49 | 17.882 | P | 0.200 | 0.001  |
| SND7 | 2006 | 334 | 23 | 49 | 17.903 | P | 0.200 | -0.021 |
| SNF6 | 2006 | 334 | 23 | 49 | 18.199 | P | 0.200 | -0.372 |
| P06A | 2006 | 334 | 23 | 49 | 17.953 | P | 0.200 | 0.118  |
| ORV  | 2006 | 334 | 23 | 49 | 17.965 | P | 0.200 | 0.073  |
| SNG5 | 2006 | 334 | 23 | 49 | 19.034 | P | 0.200 | -0.061 |
| SNE7 | 2006 | 334 | 23 | 49 | 19.338 | P | 0.200 | 0.170  |
| P01C | 2006 | 334 | 23 | 49 | 19.009 | P | 0.200 | 0.021  |
| BEK  | 2006 | 334 | 23 | 49 | 19.237 | P | 0.200 | -0.014 |
| O09A | 2006 | 334 | 23 | 49 | 19.653 | P | 0.200 | 0.262  |
| O05C | 2006 | 334 | 23 | 49 | 20.282 | P | 0.200 | 0.145  |
| GASB | 2006 | 334 | 23 | 49 | 20.460 | P | 0.200 | 0.903  |
| O07A | 2006 | 334 | 23 | 49 | 20.525 | P | 0.200 | 0.395  |
| O08A | 2006 | 334 | 23 | 49 | 20.755 | P | 0.200 | 0.100  |
| O06A | 2006 | 334 | 23 | 49 | 20.825 | P | 0.200 | 0.166  |
| O04C | 2006 | 334 | 23 | 49 | 22.214 | P | 0.200 | -0.149 |
| O02C | 2006 | 334 | 23 | 49 | 22.965 | P | 0.200 | 0.161  |
| N08A | 2006 | 334 | 23 | 49 | 23.978 | P | 0.200 | 0.417  |
| WDC  | 2006 | 334 | 23 | 49 | 24.037 | P | 0.200 | -0.859 |
| ELFS | 2006 | 334 | 23 | 49 | 24.175 | P | 0.200 | 0.082  |
| N07B | 2006 | 334 | 23 | 49 | 24.277 | P | 0.200 | 0.431  |
| N06A | 2006 | 334 | 23 | 49 | 24.412 | P | 0.200 | 0.247  |
| HATC | 2006 | 334 | 23 | 49 | 25.407 | P | 0.200 | -0.237 |
| N02C | 2006 | 334 | 23 | 49 | 27.144 | P | 0.200 | -0.002 |
| JCC  | 2006 | 334 | 23 | 49 | 27.433 | P | 0.200 | -0.144 |
| M06C | 2006 | 334 | 23 | 49 | 27.440 | P | 0.200 | 0.151  |
| M07A | 2006 | 334 | 23 | 49 | 28.098 | P | 0.200 | 0.390  |
| M03C | 2006 | 334 | 23 | 49 | 28.113 | P | 0.200 | -0.766 |
| M05C | 2006 | 334 | 23 | 49 | 28.341 | P | 0.200 | -0.322 |
| M02C | 2006 | 334 | 23 | 49 | 30.015 | P | 0.200 | -0.120 |
| M04C | 2006 | 334 | 23 | 49 | 31.527 | P | 0.200 | -0.250 |
| L07A | 2006 | 334 | 23 | 49 | 32.302 | P | 0.200 | 0.754  |
| L04A | 2006 | 334 | 23 | 49 | 33.580 | P | 0.200 | -0.490 |
| M01C | 2006 | 334 | 23 | 49 | 33.780 | P | 0.200 | 0.005  |
| K04A | 2006 | 334 | 23 | 49 | 36.295 | P | 0.200 | -0.227 |
| HUMO | 2006 | 334 | 23 | 49 | 37.084 | P | 0.200 | -0.165 |
| K05A | 2006 | 334 | 23 | 49 | 37.116 | P | 0.200 | 0.336  |
| K02A | 2006 | 334 | 23 | 49 | 38.574 | P | 0.200 | -0.105 |
| J05A | 2006 | 334 | 23 | 49 | 40.244 | P | 0.200 | 0.086  |
| J04A | 2006 | 334 | 23 | 49 | 40.262 | P | 0.200 | -0.214 |
| J03A | 2006 | 334 | 23 | 49 | 41.679 | P | 0.200 | -0.023 |
| I04A | 2006 | 334 | 23 | 49 | 43.221 | P | 0.200 | -0.433 |

|      |      |    |    |        |           |            |         |        |       |
|------|------|----|----|--------|-----------|------------|---------|--------|-------|
| 2007 | 45   | 1  | 29 | 7.7092 | -29.59000 | -112.05100 | 10.0000 | 310    | 0.004 |
| SVD  | 2007 | 45 | 1  | 39     | 38.299    | P          | 0.200   | 0.283  |       |
| LGU  | 2007 | 45 | 1  | 39     | 38.502    | P          | 0.200   | -0.581 |       |
| BFS  | 2007 | 45 | 1  | 39     | 38.992    | P          | 0.200   | -0.259 |       |
| BBR  | 2007 | 45 | 1  | 39     | 39.341    | P          | 0.200   | 0.218  |       |
| MWC  | 2007 | 45 | 1  | 39     | 39.355    | P          | 0.200   | -0.068 |       |
| DEC  | 2007 | 45 | 1  | 39     | 39.506    | P          | 0.200   | -0.011 |       |

|      |      |    |   |    |        |   |       |        |
|------|------|----|---|----|--------|---|-------|--------|
| CHF  | 2007 | 45 | 1 | 39 | 40.056 | P | 0.200 | 0.036  |
| VCS  | 2007 | 45 | 1 | 39 | 40.837 | P | 0.200 | -0.275 |
| ADO  | 2007 | 45 | 1 | 39 | 41.019 | P | 0.200 | -0.122 |
| OSI  | 2007 | 45 | 1 | 39 | 41.740 | P | 0.200 | -0.483 |
| HEC  | 2007 | 45 | 1 | 39 | 42.609 | P | 0.200 | 0.128  |
| RRX  | 2007 | 45 | 1 | 39 | 42.834 | P | 0.200 | -0.195 |
| EDW2 | 2007 | 45 | 1 | 39 | 43.059 | P | 0.200 | -0.507 |
| MPP  | 2007 | 45 | 1 | 39 | 44.474 | P | 0.200 | -0.355 |
| ARV  | 2007 | 45 | 1 | 39 | 45.278 | P | 0.200 | -0.162 |
| GSC  | 2007 | 45 | 1 | 39 | 45.824 | P | 0.200 | 0.079  |
| TUQ  | 2007 | 45 | 1 | 39 | 46.606 | P | 0.200 | 0.311  |
| LRL  | 2007 | 45 | 1 | 39 | 47.227 | P | 0.200 | -0.022 |
| SMM  | 2007 | 45 | 1 | 39 | 47.496 | P | 0.200 | -0.091 |
| ISA  | 2007 | 45 | 1 | 39 | 48.879 | P | 0.200 | -0.045 |
| V11A | 2007 | 45 | 1 | 39 | 49.156 | P | 0.200 | 0.530  |
| SHO  | 2007 | 45 | 1 | 39 | 49.381 | P | 0.200 | 0.079  |
| VES  | 2007 | 45 | 1 | 39 | 49.731 | P | 0.200 | -0.594 |
| SLA  | 2007 | 45 | 1 | 39 | 49.841 | P | 0.200 | 0.051  |
| MPM  | 2007 | 45 | 1 | 39 | 51.061 | P | 0.200 | -0.014 |
| V05C | 2007 | 45 | 1 | 39 | 51.425 | P | 0.200 | 0.365  |
| PKD  | 2007 | 45 | 1 | 39 | 51.727 | P | 0.200 | -0.346 |
| RCT  | 2007 | 45 | 1 | 39 | 52.448 | P | 0.200 | -0.962 |
| U11A | 2007 | 45 | 1 | 39 | 52.810 | P | 0.200 | 0.341  |
| FUR  | 2007 | 45 | 1 | 39 | 53.308 | P | 0.200 | 0.237  |
| CWC  | 2007 | 45 | 1 | 39 | 53.899 | P | 0.200 | 0.120  |
| U05C | 2007 | 45 | 1 | 39 | 54.113 | P | 0.200 | 0.010  |
| HELL | 2007 | 45 | 1 | 39 | 55.001 | P | 0.200 | -0.752 |
| U04C | 2007 | 45 | 1 | 39 | 55.159 | P | 0.200 | 0.375  |
| HAST | 2007 | 45 | 1 | 39 | 55.418 | P | 0.200 | -0.173 |
| SN12 | 2007 | 45 | 1 | 39 | 56.586 | P | 0.200 | -0.695 |
| T06C | 2007 | 45 | 1 | 39 | 57.193 | P | 0.200 | -0.930 |
| GRA  | 2007 | 45 | 1 | 39 | 57.201 | P | 0.200 | 0.404  |
| SAO  | 2007 | 45 | 1 | 39 | 57.602 | P | 0.200 | -0.236 |
| TIN  | 2007 | 45 | 1 | 39 | 57.886 | P | 0.200 | 0.203  |
| SN14 | 2007 | 45 | 1 | 39 | 58.471 | P | 0.200 | -0.421 |
| PACP | 2007 | 45 | 1 | 39 | 59.312 | P | 0.200 | -0.034 |
| SN34 | 2007 | 45 | 1 | 39 | 59.972 | P | 0.200 | -0.492 |
| SN43 | 2007 | 45 | 1 | 40 | 0.462  | P | 0.200 | -0.370 |
| S05C | 2007 | 45 | 1 | 40 | 0.540  | P | 0.200 | -0.122 |
| S08C | 2007 | 45 | 1 | 40 | 1.022  | P | 0.200 | 0.357  |
| S11A | 2007 | 45 | 1 | 40 | 1.106  | P | 0.200 | 0.760  |
| MLAC | 2007 | 45 | 1 | 40 | 1.650  | P | 0.200 | -0.041 |
| MHC  | 2007 | 45 | 1 | 40 | 1.879  | P | 0.200 | 0.088  |
| S04C | 2007 | 45 | 1 | 40 | 2.455  | P | 0.200 | 0.077  |
| S10A | 2007 | 45 | 1 | 40 | 2.753  | P | 0.200 | 0.238  |
| SN63 | 2007 | 45 | 1 | 40 | 2.908  | P | 0.200 | -0.036 |
| SN55 | 2007 | 45 | 1 | 40 | 3.750  | P | 0.200 | 0.025  |
| S06C | 2007 | 45 | 1 | 40 | 3.880  | P | 0.200 | 0.011  |
| SN64 | 2007 | 45 | 1 | 40 | 3.900  | P | 0.200 | 0.111  |
| TPH  | 2007 | 45 | 1 | 40 | 4.058  | P | 0.200 | 0.431  |
| SN74 | 2007 | 45 | 1 | 40 | 4.581  | P | 0.200 | -0.039 |
| SN65 | 2007 | 45 | 1 | 40 | 4.871  | P | 0.200 | 0.229  |
| CMB  | 2007 | 45 | 1 | 40 | 5.035  | P | 0.200 | -0.123 |
| R09A | 2007 | 45 | 1 | 40 | 5.080  | P | 0.200 | 0.391  |
| R07C | 2007 | 45 | 1 | 40 | 5.195  | P | 0.200 | 0.445  |
| R10A | 2007 | 45 | 1 | 40 | 5.298  | P | 0.200 | 0.612  |
| SN75 | 2007 | 45 | 1 | 40 | 5.612  | P | 0.200 | 0.096  |
| SN84 | 2007 | 45 | 1 | 40 | 5.634  | P | 0.200 | -0.194 |
| R08A | 2007 | 45 | 1 | 40 | 5.925  | P | 0.200 | 0.051  |
| SN93 | 2007 | 45 | 1 | 40 | 6.168  | P | 0.200 | 0.315  |
| SN85 | 2007 | 45 | 1 | 40 | 6.669  | P | 0.200 | 0.102  |
| R04C | 2007 | 45 | 1 | 40 | 6.849  | P | 0.200 | 0.133  |
| SN95 | 2007 | 45 | 1 | 40 | 6.854  | P | 0.200 | -0.188 |

|      |      |    |   |    |        |   |       |        |
|------|------|----|---|----|--------|---|-------|--------|
| SNA3 | 2007 | 45 | 1 | 40 | 7.816  | P | 0.200 | 0.296  |
| SN96 | 2007 | 45 | 1 | 40 | 7.999  | P | 0.200 | 0.169  |
| SN86 | 2007 | 45 | 1 | 40 | 8.061  | P | 0.200 | 0.190  |
| R06C | 2007 | 45 | 1 | 40 | 8.082  | P | 0.200 | 0.396  |
| SNA4 | 2007 | 45 | 1 | 40 | 8.088  | P | 0.200 | -0.137 |
| Q10A | 2007 | 45 | 1 | 40 | 8.437  | P | 0.200 | 0.381  |
| Q11A | 2007 | 45 | 1 | 40 | 8.482  | P | 0.200 | 0.516  |
| SNB3 | 2007 | 45 | 1 | 40 | 8.575  | P | 0.200 | -0.134 |
| SNA5 | 2007 | 45 | 1 | 40 | 8.917  | P | 0.200 | -0.032 |
| Q08A | 2007 | 45 | 1 | 40 | 9.031  | P | 0.200 | 0.144  |
| Q09A | 2007 | 45 | 1 | 40 | 9.089  | P | 0.200 | 0.673  |
| R05C | 2007 | 45 | 1 | 40 | 9.382  | P | 0.200 | 0.033  |
| LAVA | 2007 | 45 | 1 | 40 | 9.594  | P | 0.200 | -0.192 |
| SNC3 | 2007 | 45 | 1 | 40 | 9.741  | P | 0.200 | -0.040 |
| SNB5 | 2007 | 45 | 1 | 40 | 9.999  | P | 0.200 | -0.322 |
| SN97 | 2007 | 45 | 1 | 40 | 10.021 | P | 0.200 | 0.321  |
| SNC4 | 2007 | 45 | 1 | 40 | 10.264 | P | 0.200 | -0.100 |
| Q07A | 2007 | 45 | 1 | 40 | 10.301 | P | 0.200 | 0.517  |
| SN98 | 2007 | 45 | 1 | 40 | 10.312 | P | 0.200 | 0.169  |
| SNB6 | 2007 | 45 | 1 | 40 | 10.572 | P | 0.200 | 0.087  |
| Q04C | 2007 | 45 | 1 | 40 | 10.711 | P | 0.200 | 0.016  |
| SNC5 | 2007 | 45 | 1 | 40 | 11.033 | P | 0.200 | -0.495 |
| SNA7 | 2007 | 45 | 1 | 40 | 11.456 | P | 0.200 | 0.352  |
| SND4 | 2007 | 45 | 1 | 40 | 11.481 | P | 0.200 | -0.295 |
| SNB7 | 2007 | 45 | 1 | 40 | 11.536 | P | 0.200 | 0.100  |
| SNA8 | 2007 | 45 | 1 | 40 | 11.674 | P | 0.200 | 0.308  |
| SNC6 | 2007 | 45 | 1 | 40 | 11.816 | P | 0.200 | 0.096  |
| MNRC | 2007 | 45 | 1 | 40 | 11.927 | P | 0.200 | 0.131  |
| SND5 | 2007 | 45 | 1 | 40 | 11.977 | P | 0.200 | -0.537 |
| SNE4 | 2007 | 45 | 1 | 40 | 12.778 | P | 0.200 | -0.383 |
| SUTB | 2007 | 45 | 1 | 40 | 12.807 | P | 0.200 | -0.572 |
| P09A | 2007 | 45 | 1 | 40 | 12.824 | P | 0.200 | -0.089 |
| SNC7 | 2007 | 45 | 1 | 40 | 13.154 | P | 0.200 | -0.131 |
| P05C | 2007 | 45 | 1 | 40 | 13.174 | P | 0.200 | 0.067  |
| SNB9 | 2007 | 45 | 1 | 40 | 13.190 | P | 0.200 | 0.177  |
| SNE5 | 2007 | 45 | 1 | 40 | 13.499 | P | 0.200 | -0.488 |
| SNE6 | 2007 | 45 | 1 | 40 | 14.009 | P | 0.200 | -0.415 |
| P07A | 2007 | 45 | 1 | 40 | 14.108 | P | 0.200 | 0.567  |
| SNC8 | 2007 | 45 | 1 | 40 | 14.153 | P | 0.200 | 0.130  |
| P08A | 2007 | 45 | 1 | 40 | 14.409 | P | 0.200 | 0.320  |
| SND8 | 2007 | 45 | 1 | 40 | 15.106 | P | 0.200 | -0.014 |
| SND7 | 2007 | 45 | 1 | 40 | 15.126 | P | 0.200 | -0.035 |
| ORV  | 2007 | 45 | 1 | 40 | 15.133 | P | 0.200 | 0.008  |
| P06A | 2007 | 45 | 1 | 40 | 15.229 | P | 0.200 | 0.153  |
| SNF6 | 2007 | 45 | 1 | 40 | 15.420 | P | 0.200 | -0.387 |
| P01C | 2007 | 45 | 1 | 40 | 16.121 | P | 0.200 | -0.093 |
| SNG5 | 2007 | 45 | 1 | 40 | 16.204 | P | 0.200 | -0.126 |
| SND9 | 2007 | 45 | 1 | 40 | 16.298 | P | 0.200 | 0.257  |
| SNE7 | 2007 | 45 | 1 | 40 | 16.512 | P | 0.200 | 0.105  |
| O09A | 2007 | 45 | 1 | 40 | 16.748 | P | 0.200 | 0.098  |
| O05C | 2007 | 45 | 1 | 40 | 17.458 | P | 0.200 | 0.083  |
| SNE9 | 2007 | 45 | 1 | 40 | 17.471 | P | 0.200 | 0.091  |
| O07A | 2007 | 45 | 1 | 40 | 17.662 | P | 0.200 | 0.283  |
| GASB | 2007 | 45 | 1 | 40 | 17.726 | P | 0.200 | 0.939  |
| SNF8 | 2007 | 45 | 1 | 40 | 17.775 | P | 0.200 | 0.156  |
| O03C | 2007 | 45 | 1 | 40 | 17.865 | P | 0.200 | -0.368 |
| O08A | 2007 | 45 | 1 | 40 | 17.896 | P | 0.200 | -0.013 |
| O06A | 2007 | 45 | 1 | 40 | 18.008 | P | 0.200 | 0.104  |
| SNG7 | 2007 | 45 | 1 | 40 | 18.277 | P | 0.200 | -0.192 |
| SNF9 | 2007 | 45 | 1 | 40 | 18.350 | P | 0.200 | -0.096 |
| O04C | 2007 | 45 | 1 | 40 | 19.394 | P | 0.200 | -0.212 |
| O02C | 2007 | 45 | 1 | 40 | 20.137 | P | 0.200 | 0.095  |
| O01C | 2007 | 45 | 1 | 40 | 21.032 | P | 0.200 | 0.395  |



|      |      |    |   |    |        |   |       |        |
|------|------|----|---|----|--------|---|-------|--------|
| N08A | 2007 | 45 | 1 | 40 | 21.127 | P | 0.200 | 0.302  |
| ELFS | 2007 | 45 | 1 | 40 | 21.361 | P | 0.200 | 0.016  |
| N07B | 2007 | 45 | 1 | 40 | 21.422 | P | 0.200 | 0.315  |
| N06A | 2007 | 45 | 1 | 40 | 21.553 | P | 0.200 | 0.130  |
| HATC | 2007 | 45 | 1 | 40 | 22.592 | P | 0.200 | -0.301 |
| N02C | 2007 | 45 | 1 | 40 | 24.375 | P | 0.200 | -0.012 |
| M06C | 2007 | 45 | 1 | 40 | 24.584 | P | 0.200 | 0.039  |
| M07A | 2007 | 45 | 1 | 40 | 25.250 | P | 0.200 | 0.280  |
| M03C | 2007 | 45 | 1 | 40 | 25.304 | P | 0.200 | -0.829 |
| M05C | 2007 | 45 | 1 | 40 | 25.585 | P | 0.200 | -0.336 |
| M02C | 2007 | 45 | 1 | 40 | 27.255 | P | 0.200 | -0.136 |
| YBH  | 2007 | 45 | 1 | 40 | 28.458 | P | 0.200 | -0.809 |
| M04C | 2007 | 45 | 1 | 40 | 28.726 | P | 0.200 | -0.315 |
| L07A | 2007 | 45 | 1 | 40 | 29.463 | P | 0.200 | 0.639  |
| L05A | 2007 | 45 | 1 | 40 | 30.083 | P | 0.200 | 0.140  |
| L04A | 2007 | 45 | 1 | 40 | 30.833 | P | 0.200 | -0.505 |
| M01C | 2007 | 45 | 1 | 40 | 30.873 | P | 0.200 | -0.159 |
| L02A | 2007 | 45 | 1 | 40 | 32.353 | P | 0.200 | -0.026 |
| K04A | 2007 | 45 | 1 | 40 | 33.506 | P | 0.200 | -0.289 |
| HUMO | 2007 | 45 | 1 | 40 | 34.241 | P | 0.200 | -0.278 |
| K05A | 2007 | 45 | 1 | 40 | 34.331 | P | 0.200 | 0.274  |
| K02A | 2007 | 45 | 1 | 40 | 35.731 | P | 0.200 | -0.219 |
| J05A | 2007 | 45 | 1 | 40 | 37.416 | P | 0.200 | -0.026 |
| J04A | 2007 | 45 | 1 | 40 | 37.530 | P | 0.200 | -0.228 |
| DBO  | 2007 | 45 | 1 | 40 | 37.739 | P | 0.200 | 0.002  |
| J03A | 2007 | 45 | 1 | 40 | 38.996 | P | 0.200 | 0.013  |
| J02A | 2007 | 45 | 1 | 40 | 39.319 | P | 0.200 | 0.012  |
| I04A | 2007 | 45 | 1 | 40 | 40.346 | P | 0.200 | -0.597 |
| I03A | 2007 | 45 | 1 | 40 | 42.492 | P | 0.200 | -0.145 |
| TAKO | 2007 | 45 | 1 | 40 | 43.643 | P | 0.200 | 1.718  |

|      |      |     |    |         |           |            |         |        |       |
|------|------|-----|----|---------|-----------|------------|---------|--------|-------|
| 2007 | 103  | 18  | 24 | 19.9251 | -35.05100 | -108.83600 | 10.0000 | 323    | 0.002 |
| CIA  | 2007 | 103 | 18 | 35      | 22.689    | P          | 0.200   | -0.562 |       |
| SVD  | 2007 | 103 | 18 | 35      | 26.946    | P          | 0.200   | 0.238  |       |
| SCZ2 | 2007 | 103 | 18 | 35      | 27.292    | P          | 0.200   | -0.518 |       |
| DJJ  | 2007 | 103 | 18 | 35      | 27.535    | P          | 0.200   | -0.135 |       |
| LGU  | 2007 | 103 | 18 | 35      | 27.666    | P          | 0.200   | -0.419 |       |
| BFS  | 2007 | 103 | 18 | 35      | 27.676    | P          | 0.200   | -0.305 |       |
| PASC | 2007 | 103 | 18 | 35      | 27.684    | P          | 0.200   | -0.086 |       |
| BBR  | 2007 | 103 | 18 | 35      | 27.738    | P          | 0.200   | 0.021  |       |
| MWC  | 2007 | 103 | 18 | 35      | 28.162    | P          | 0.200   | -0.054 |       |
| DEC  | 2007 | 103 | 18 | 35      | 28.293    | P          | 0.200   | -0.053 |       |
| CHF  | 2007 | 103 | 18 | 35      | 28.758    | P          | 0.200   | -0.004 |       |
| VTV  | 2007 | 103 | 18 | 35      | 29.320    | P          | 0.200   | -0.372 |       |
| VCS  | 2007 | 103 | 18 | 35      | 29.538    | P          | 0.200   | -0.264 |       |
| HEC  | 2007 | 103 | 18 | 35      | 30.850    | P          | 0.200   | 0.132  |       |
| RRX  | 2007 | 103 | 18 | 35      | 31.173    | P          | 0.200   | -0.194 |       |
| EDW2 | 2007 | 103 | 18 | 35      | 31.613    | P          | 0.200   | -0.445 |       |
| MPP  | 2007 | 103 | 18 | 35      | 33.291    | P          | 0.200   | -0.289 |       |
| ARV  | 2007 | 103 | 18 | 35      | 33.851    | P          | 0.200   | -0.090 |       |
| GSC  | 2007 | 103 | 18 | 35      | 33.942    | P          | 0.200   | 0.075  |       |
| TUQ  | 2007 | 103 | 18 | 35      | 34.206    | P          | 0.200   | 0.031  |       |
| LRL  | 2007 | 103 | 18 | 35      | 35.415    | P          | 0.200   | -0.005 |       |
| SMM  | 2007 | 103 | 18 | 35      | 36.144    | P          | 0.200   | -0.030 |       |
| V11A | 2007 | 103 | 18 | 35      | 36.388    | P          | 0.200   | 0.148  |       |
| SHO  | 2007 | 103 | 18 | 35      | 36.894    | P          | 0.200   | -0.153 |       |
| PHL  | 2007 | 103 | 18 | 35      | 36.918    | P          | 0.200   | -0.338 |       |
| ISA  | 2007 | 103 | 18 | 35      | 37.159    | P          | 0.200   | 0.018  |       |
| VES  | 2007 | 103 | 18 | 35      | 38.120    | P          | 0.200   | -0.440 |       |
| V04C | 2007 | 103 | 18 | 35      | 38.609    | P          | 0.200   | -0.311 |       |
| MPM  | 2007 | 103 | 18 | 35      | 38.912    | P          | 0.200   | -0.056 |       |
| V05C | 2007 | 103 | 18 | 35      | 39.711    | P          | 0.200   | 0.303  |       |
| U11A | 2007 | 103 | 18 | 35      | 39.830    | P          | 0.200   | -0.008 |       |

|      |      |     |    |    |        |   |       |        |
|------|------|-----|----|----|--------|---|-------|--------|
| PKD  | 2007 | 103 | 18 | 35 | 40.107 | P | 0.200 | -0.339 |
| U10A | 2007 | 103 | 18 | 35 | 40.590 | P | 0.200 | 0.292  |
| FUR  | 2007 | 103 | 18 | 35 | 40.874 | P | 0.200 | 0.205  |
| CWC  | 2007 | 103 | 18 | 35 | 41.673 | P | 0.200 | 0.085  |
| U05C | 2007 | 103 | 18 | 35 | 42.415 | P | 0.200 | 0.176  |
| HELL | 2007 | 103 | 18 | 35 | 42.854 | P | 0.200 | -0.719 |
| U04C | 2007 | 103 | 18 | 35 | 43.428 | P | 0.200 | 0.443  |
| HAST | 2007 | 103 | 18 | 35 | 43.709 | P | 0.200 | -0.154 |
| TPNV | 2007 | 103 | 18 | 35 | 43.902 | P | 0.200 | 0.546  |
| SN12 | 2007 | 103 | 18 | 35 | 44.338 | P | 0.200 | -0.660 |
| GRA  | 2007 | 103 | 18 | 35 | 44.667 | P | 0.200 | 0.418  |
| T11A | 2007 | 103 | 18 | 35 | 44.880 | P | 0.200 | 0.164  |
| T06C | 2007 | 103 | 18 | 35 | 44.991 | P | 0.200 | -0.901 |
| TIN  | 2007 | 103 | 18 | 35 | 45.409 | P | 0.200 | 0.187  |
| SAO  | 2007 | 103 | 18 | 35 | 45.811 | P | 0.200 | -0.127 |
| SN14 | 2007 | 103 | 18 | 35 | 46.084 | P | 0.200 | -0.402 |
| T05C | 2007 | 103 | 18 | 35 | 46.510 | P | 0.200 | 0.504  |
| PACP | 2007 | 103 | 18 | 35 | 47.443 | P | 0.200 | 0.137  |
| SN34 | 2007 | 103 | 18 | 35 | 47.462 | P | 0.200 | -0.510 |
| S11A | 2007 | 103 | 18 | 35 | 47.764 | P | 0.200 | 0.533  |
| SN43 | 2007 | 103 | 18 | 35 | 48.048 | P | 0.200 | -0.340 |
| S08C | 2007 | 103 | 18 | 35 | 48.338 | P | 0.200 | 0.330  |
| S05C | 2007 | 103 | 18 | 35 | 48.410 | P | 0.200 | 0.048  |
| BNLO | 2007 | 103 | 18 | 35 | 48.457 | P | 0.200 | -0.467 |
| S09A | 2007 | 103 | 18 | 35 | 48.723 | P | 0.200 | 0.208  |
| MLAC | 2007 | 103 | 18 | 35 | 49.052 | P | 0.200 | -0.019 |
| S10A | 2007 | 103 | 18 | 35 | 49.436 | P | 0.200 | 0.014  |
| MHC  | 2007 | 103 | 18 | 35 | 49.844 | P | 0.200 | 0.203  |
| S04C | 2007 | 103 | 18 | 35 | 50.264 | P | 0.200 | 0.152  |
| JRSC | 2007 | 103 | 18 | 35 | 50.294 | P | 0.200 | 0.054  |
| SN63 | 2007 | 103 | 18 | 35 | 50.445 | P | 0.200 | 0.035  |
| SN55 | 2007 | 103 | 18 | 35 | 51.107 | P | 0.200 | 0.045  |
| SN64 | 2007 | 103 | 18 | 35 | 51.353 | P | 0.200 | 0.188  |
| WENL | 2007 | 103 | 18 | 35 | 51.468 | P | 0.200 | 0.410  |
| R11A | 2007 | 103 | 18 | 35 | 51.675 | P | 0.200 | 0.233  |
| R10A | 2007 | 103 | 18 | 35 | 51.772 | P | 0.200 | 0.392  |
| R09A | 2007 | 103 | 18 | 35 | 51.800 | P | 0.200 | 0.255  |
| SN74 | 2007 | 103 | 18 | 35 | 51.965 | P | 0.200 | -0.020 |
| SN65 | 2007 | 103 | 18 | 35 | 52.195 | P | 0.200 | 0.244  |
| R07C | 2007 | 103 | 18 | 35 | 52.420 | P | 0.200 | 0.478  |
| CMB  | 2007 | 103 | 18 | 35 | 52.450 | P | 0.200 | -0.118 |
| SN75 | 2007 | 103 | 18 | 35 | 52.853 | P | 0.200 | 0.064  |
| R08A | 2007 | 103 | 18 | 35 | 52.854 | P | 0.200 | 0.011  |
| BRK  | 2007 | 103 | 18 | 35 | 52.919 | P | 0.200 | -0.082 |
| SN84 | 2007 | 103 | 18 | 35 | 52.966 | P | 0.200 | -0.177 |
| BRIB | 2007 | 103 | 18 | 35 | 53.230 | P | 0.200 | -0.107 |
| BDM  | 2007 | 103 | 18 | 35 | 53.525 | P | 0.200 | 0.317  |
| SN93 | 2007 | 103 | 18 | 35 | 53.555 | P | 0.200 | 0.335  |
| SN85 | 2007 | 103 | 18 | 35 | 53.870 | P | 0.200 | 0.071  |
| SN95 | 2007 | 103 | 18 | 35 | 54.118 | P | 0.200 | -0.185 |
| R04C | 2007 | 103 | 18 | 35 | 54.225 | P | 0.200 | 0.155  |
| Q11A | 2007 | 103 | 18 | 35 | 54.552 | P | 0.200 | 0.255  |
| Q10A | 2007 | 103 | 18 | 35 | 54.592 | P | 0.200 | 0.056  |
| SNA3 | 2007 | 103 | 18 | 35 | 55.110 | P | 0.200 | 0.310  |
| SN96 | 2007 | 103 | 18 | 35 | 55.125 | P | 0.200 | 0.143  |
| R06C | 2007 | 103 | 18 | 35 | 55.214 | P | 0.200 | 0.471  |
| SNA4 | 2007 | 103 | 18 | 35 | 55.258 | P | 0.200 | -0.171 |
| Q09A | 2007 | 103 | 18 | 35 | 55.465 | P | 0.200 | 0.447  |
| CVS  | 2007 | 103 | 18 | 35 | 55.547 | P | 0.200 | -0.448 |
| Q08A | 2007 | 103 | 18 | 35 | 55.607 | P | 0.200 | 0.027  |
| SNB3 | 2007 | 103 | 18 | 35 | 55.918 | P | 0.200 | -0.022 |
| SNA5 | 2007 | 103 | 18 | 35 | 56.100 | P | 0.200 | 0.046  |
| R05C | 2007 | 103 | 18 | 35 | 56.458 | P | 0.200 | 0.039  |

|      |      |     |    |    |        |   |       |        |
|------|------|-----|----|----|--------|---|-------|--------|
| LAVA | 2007 | 103 | 18 | 35 | 56.721 | P | 0.200 | -0.182 |
| SNC3 | 2007 | 103 | 18 | 35 | 56.991 | P | 0.200 | 0.020  |
| SN97 | 2007 | 103 | 18 | 35 | 57.017 | P | 0.200 | 0.335  |
| Q07A | 2007 | 103 | 18 | 35 | 57.163 | P | 0.200 | 0.594  |
| SNC4 | 2007 | 103 | 18 | 35 | 57.372 | P | 0.200 | -0.082 |
| SNB6 | 2007 | 103 | 18 | 35 | 57.539 | P | 0.200 | 0.050  |
| Q03C | 2007 | 103 | 18 | 35 | 57.941 | P | 0.200 | 0.702  |
| Q04C | 2007 | 103 | 18 | 35 | 57.967 | P | 0.200 | 0.134  |
| SNC5 | 2007 | 103 | 18 | 35 | 58.088 | P | 0.200 | -0.443 |
| SNA7 | 2007 | 103 | 18 | 35 | 58.373 | P | 0.200 | 0.347  |
| SNB7 | 2007 | 103 | 18 | 35 | 58.464 | P | 0.200 | 0.115  |
| SNA8 | 2007 | 103 | 18 | 35 | 58.466 | P | 0.200 | 0.271  |
| SND4 | 2007 | 103 | 18 | 35 | 58.525 | P | 0.200 | -0.287 |
| SNC6 | 2007 | 103 | 18 | 35 | 58.763 | P | 0.200 | 0.107  |
| P09A | 2007 | 103 | 18 | 35 | 58.876 | P | 0.200 | -0.329 |
| SND5 | 2007 | 103 | 18 | 35 | 59.025 | P | 0.200 | -0.428 |
| MNRC | 2007 | 103 | 18 | 35 | 59.214 | P | 0.200 | 0.202  |
| WCN  | 2007 | 103 | 18 | 35 | 59.749 | P | 0.200 | 0.288  |
| SNE4 | 2007 | 103 | 18 | 35 | 59.799 | P | 0.200 | -0.331 |
| SNB9 | 2007 | 103 | 18 | 35 | 59.912 | P | 0.200 | 0.178  |
| SUTB | 2007 | 103 | 18 | 35 | 59.924 | P | 0.200 | -0.465 |
| SNC7 | 2007 | 103 | 18 | 36 | 0.039  | P | 0.200 | -0.072 |
| P05C | 2007 | 103 | 18 | 36 | 0.089  | P | 0.200 | 0.128  |
| SNE5 | 2007 | 103 | 18 | 36 | 0.485  | P | 0.200 | -0.370 |
| P08A | 2007 | 103 | 18 | 36 | 0.684  | P | 0.200 | 0.235  |
| P07A | 2007 | 103 | 18 | 36 | 0.811  | P | 0.200 | 0.748  |
| SNE6 | 2007 | 103 | 18 | 36 | 0.869  | P | 0.200 | -0.353 |
| SNC8 | 2007 | 103 | 18 | 36 | 0.927  | P | 0.200 | 0.196  |
| P06A | 2007 | 103 | 18 | 36 | 1.843  | P | 0.200 | 0.152  |
| SND8 | 2007 | 103 | 18 | 36 | 1.871  | P | 0.200 | 0.097  |
| SND7 | 2007 | 103 | 18 | 36 | 1.940  | P | 0.200 | 0.080  |
| ORV  | 2007 | 103 | 18 | 36 | 2.124  | P | 0.200 | 0.179  |
| SNF6 | 2007 | 103 | 18 | 36 | 2.313  | P | 0.200 | -0.238 |
| O09A | 2007 | 103 | 18 | 36 | 2.684  | P | 0.200 | 0.016  |
| SND9 | 2007 | 103 | 18 | 36 | 2.908  | P | 0.200 | 0.329  |
| BEK  | 2007 | 103 | 18 | 36 | 3.094  | P | 0.200 | 0.043  |
| SNG5 | 2007 | 103 | 18 | 36 | 3.123  | P | 0.200 | 0.038  |
| SNE7 | 2007 | 103 | 18 | 36 | 3.210  | P | 0.200 | 0.152  |
| P01C | 2007 | 103 | 18 | 36 | 3.407  | P | 0.200 | 0.166  |
| O08A | 2007 | 103 | 18 | 36 | 3.966  | P | 0.200 | -0.039 |
| SNE9 | 2007 | 103 | 18 | 36 | 4.012  | P | 0.200 | 0.150  |
| O05C | 2007 | 103 | 18 | 36 | 4.105  | P | 0.200 | 0.146  |
| SNF8 | 2007 | 103 | 18 | 36 | 4.371  | P | 0.200 | 0.212  |
| O03C | 2007 | 103 | 18 | 36 | 4.452  | P | 0.200 | -0.448 |
| O06A | 2007 | 103 | 18 | 36 | 4.494  | P | 0.200 | 0.228  |
| SNF9 | 2007 | 103 | 18 | 36 | 4.743  | P | 0.200 | -0.137 |
| SNG7 | 2007 | 103 | 18 | 36 | 4.933  | P | 0.200 | -0.075 |
| O04C | 2007 | 103 | 18 | 36 | 5.895  | P | 0.200 | -0.153 |
| N08A | 2007 | 103 | 18 | 36 | 6.774  | P | 0.200 | 0.070  |
| O02C | 2007 | 103 | 18 | 36 | 6.806  | P | 0.200 | 0.114  |
| N07B | 2007 | 103 | 18 | 36 | 7.378  | P | 0.200 | 0.280  |
| ELFS | 2007 | 103 | 18 | 36 | 7.690  | P | 0.200 | 0.077  |
| N06A | 2007 | 103 | 18 | 36 | 7.725  | P | 0.200 | 0.205  |
| WDC  | 2007 | 103 | 18 | 36 | 7.829  | P | 0.200 | -0.770 |
| O01C | 2007 | 103 | 18 | 36 | 7.892  | P | 0.200 | 0.501  |
| HATC | 2007 | 103 | 18 | 36 | 8.903  | P | 0.200 | -0.246 |
| M06C | 2007 | 103 | 18 | 36 | 10.670 | P | 0.200 | 0.159  |
| N02C | 2007 | 103 | 18 | 36 | 10.785 | P | 0.200 | -0.009 |
| M07A | 2007 | 103 | 18 | 36 | 11.006 | P | 0.200 | 0.301  |
| JCC  | 2007 | 103 | 18 | 36 | 11.172 | P | 0.200 | -0.096 |
| M03C | 2007 | 103 | 18 | 36 | 11.513 | P | 0.200 | -0.719 |
| M05C | 2007 | 103 | 18 | 36 | 11.667 | P | 0.200 | -0.214 |
| M02C | 2007 | 103 | 18 | 36 | 13.418 | P | 0.200 | -0.074 |

|      |      |     |    |    |        |   |       |        |
|------|------|-----|----|----|--------|---|-------|--------|
| YBH  | 2007 | 103 | 18 | 36 | 14.504 | P | 0.200 | -0.697 |
| M04C | 2007 | 103 | 18 | 36 | 14.677 | P | 0.200 | -0.201 |
| L07A | 2007 | 103 | 18 | 36 | 15.004 | P | 0.200 | 0.708  |
| L05A | 2007 | 103 | 18 | 36 | 15.720 | P | 0.200 | 0.143  |
| L04A | 2007 | 103 | 18 | 36 | 16.709 | P | 0.200 | -0.297 |
| M01C | 2007 | 103 | 18 | 36 | 16.963 | P | 0.200 | -0.048 |
| L02A | 2007 | 103 | 18 | 36 | 18.116 | P | 0.200 | -0.070 |
| K04A | 2007 | 103 | 18 | 36 | 19.016 | P | 0.200 | -0.239 |
| K05A | 2007 | 103 | 18 | 36 | 19.613 | P | 0.200 | 0.220  |
| HUMO | 2007 | 103 | 18 | 36 | 19.951 | P | 0.200 | -0.130 |
| K02A | 2007 | 103 | 18 | 36 | 21.404 | P | 0.200 | -0.059 |
| J05A | 2007 | 103 | 18 | 36 | 22.574 | P | 0.200 | 0.015  |
| J04A | 2007 | 103 | 18 | 36 | 22.783 | P | 0.200 | -0.169 |
| DBO  | 2007 | 103 | 18 | 36 | 23.183 | P | 0.200 | 0.117  |
| J03A | 2007 | 103 | 18 | 36 | 24.203 | P | 0.200 | 0.028  |
| J02A | 2007 | 103 | 18 | 36 | 24.420 | P | 0.200 | -0.117 |
| I04A | 2007 | 103 | 18 | 36 | 25.317 | P | 0.200 | -0.583 |

|      |     |    |    |        |           |            |          |     |       |
|------|-----|----|----|--------|-----------|------------|----------|-----|-------|
| 1988 | 191 | 15 | 11 | 0.1647 | -29.82200 | -179.06300 | 272.0000 | 409 | 0.004 |
|------|-----|----|----|--------|-----------|------------|----------|-----|-------|

|     |      |     |    |    |        |   |       |        |
|-----|------|-----|----|----|--------|---|-------|--------|
| bmd | 1988 | 191 | 15 | 23 | 14.100 | P | 0.200 | 0.091  |
| jhn | 1988 | 191 | 15 | 23 | 13.050 | P | 0.200 | -0.549 |
| ndl | 1988 | 191 | 15 | 23 | 13.630 | P | 0.200 | -0.504 |
| WMD | 1988 | 191 | 15 | 23 | 13.770 | P | 0.200 | -0.652 |
| cha | 1988 | 191 | 15 | 23 | 15.090 | P | 0.200 | -0.508 |
| cou | 1988 | 191 | 15 | 23 | 15.400 | P | 0.200 | -0.170 |
| jun | 1988 | 191 | 15 | 23 | 15.520 | P | 0.200 | -0.500 |
| twr | 1988 | 191 | 15 | 23 | 14.800 | P | 0.200 | -0.442 |
| BMT | 1988 | 191 | 15 | 23 | 10.990 | P | 0.200 | 0.349  |
| BNP | 1988 | 191 | 15 | 23 | 20.460 | P | 0.200 | 0.136  |
| CLC | 1988 | 191 | 15 | 23 | 15.820 | P | 0.200 | 0.032  |
| FRI | 1988 | 191 | 15 | 23 | 12.960 | P | 0.200 | -0.277 |
| GSC | 1988 | 191 | 15 | 23 | 16.760 | P | 0.200 | 0.259  |
| ISA | 1988 | 191 | 15 | 23 | 12.980 | P | 0.200 | 0.369  |
| LRM | 1988 | 191 | 15 | 23 | 14.570 | P | 0.200 | 0.195  |
| SRT | 1988 | 191 | 15 | 23 | 15.190 | P | 0.200 | 0.241  |
| TOW | 1988 | 191 | 15 | 23 | 15.680 | P | 0.200 | 0.438  |
| WAS | 1988 | 191 | 15 | 23 | 12.850 | P | 0.200 | -0.081 |
| WBS | 1988 | 191 | 15 | 23 | 13.470 | P | 0.200 | 0.020  |
| WCH | 1988 | 191 | 15 | 23 | 14.920 | P | 0.200 | 0.017  |
| WCX | 1988 | 191 | 15 | 23 | 15.370 | P | 0.200 | -0.067 |
| WHF | 1988 | 191 | 15 | 23 | 13.320 | P | 0.200 | 0.274  |
| WHS | 1988 | 191 | 15 | 23 | 16.200 | P | 0.200 | -0.143 |
| WHV | 1988 | 191 | 15 | 23 | 12.330 | P | 0.200 | 0.284  |
| WJP | 1988 | 191 | 15 | 23 | 12.160 | P | 0.200 | 0.209  |
| WMF | 1988 | 191 | 15 | 23 | 16.020 | P | 0.200 | 0.098  |
| WOF | 1988 | 191 | 15 | 23 | 11.710 | P | 0.200 | -0.057 |
| WOR | 1988 | 191 | 15 | 23 | 13.500 | P | 0.200 | -0.033 |
| WRC | 1988 | 191 | 15 | 23 | 16.300 | P | 0.200 | 0.395  |
| WSC | 1988 | 191 | 15 | 23 | 14.470 | P | 0.200 | -0.042 |
| WSH | 1988 | 191 | 15 | 23 | 15.370 | P | 0.200 | -0.134 |
| WVP | 1988 | 191 | 15 | 23 | 15.820 | P | 0.200 | 0.333  |
| XMS | 1988 | 191 | 15 | 23 | 15.750 | P | 0.200 | 0.173  |
| ARV | 1988 | 191 | 15 | 23 | 9.798  | P | 0.200 | 0.083  |
| TJR | 1988 | 191 | 15 | 23 | 9.612  | P | 0.200 | -0.237 |
| WCS | 1988 | 191 | 15 | 23 | 16.260 | P | 0.200 | 0.285  |
| WLH | 1988 | 191 | 15 | 23 | 14.760 | P | 0.200 | -0.068 |
| BLK | 1988 | 191 | 15 | 23 | 14.990 | P | 0.200 | 0.365  |
| CAL | 1988 | 191 | 15 | 23 | 12.580 | P | 0.200 | 0.122  |
| FLS | 1988 | 191 | 15 | 23 | 14.820 | P | 0.200 | -0.043 |
| HOD | 1988 | 191 | 15 | 23 | 13.670 | P | 0.200 | -0.254 |
| SBK | 1988 | 191 | 15 | 23 | 13.690 | P | 0.200 | -0.005 |

|      |     |   |    |         |           |            |         |     |        |
|------|-----|---|----|---------|-----------|------------|---------|-----|--------|
| 2006 | 121 | 2 | 24 | 42.2429 | -28.45800 | -176.85201 | 37.2000 | 123 | -0.009 |
|------|-----|---|----|---------|-----------|------------|---------|-----|--------|

|      |      |     |   |    |        |   |       |        |
|------|------|-----|---|----|--------|---|-------|--------|
| CIA  | 2006 | 121 | 2 | 37 | 1.972  | P | 0.200 | -0.656 |
| LGU  | 2006 | 121 | 2 | 37 | 2.320  | P | 0.200 | -0.499 |
| HAST | 2006 | 121 | 2 | 37 | 3.011  | P | 0.200 | 0.264  |
| MPP  | 2006 | 121 | 2 | 37 | 3.528  | P | 0.200 | 0.358  |
| DJJ  | 2006 | 121 | 2 | 37 | 4.369  | P | 0.200 | -0.281 |
| SMM  | 2006 | 121 | 2 | 37 | 4.377  | P | 0.200 | 0.369  |
| PKD  | 2006 | 121 | 2 | 37 | 4.378  | P | 0.200 | 0.088  |
| SAO  | 2006 | 121 | 2 | 37 | 4.497  | P | 0.200 | -0.030 |
| OSI  | 2006 | 121 | 2 | 37 | 5.629  | P | 0.200 | -0.102 |
| U04C | 2006 | 121 | 2 | 37 | 5.695  | P | 0.200 | 0.649  |
| BRK  | 2006 | 121 | 2 | 37 | 6.060  | P | 0.200 | 0.225  |
| PACP | 2006 | 121 | 2 | 37 | 6.281  | P | 0.200 | 0.397  |
| MHC  | 2006 | 121 | 2 | 37 | 6.346  | P | 0.200 | 0.216  |
| CHF  | 2006 | 121 | 2 | 37 | 6.551  | P | 0.200 | -0.387 |
| ARV  | 2006 | 121 | 2 | 37 | 6.723  | P | 0.200 | -0.071 |
| P01C | 2006 | 121 | 2 | 37 | 7.218  | P | 0.200 | -1.254 |
| BFS  | 2006 | 121 | 2 | 37 | 7.407  | P | 0.200 | -0.364 |
| BDM  | 2006 | 121 | 2 | 37 | 7.642  | P | 0.200 | 0.408  |
| S04C | 2006 | 121 | 2 | 37 | 7.694  | P | 0.200 | 0.279  |
| T05C | 2006 | 121 | 2 | 37 | 7.919  | P | 0.200 | 0.616  |
| VES  | 2006 | 121 | 2 | 37 | 8.139  | P | 0.200 | -0.225 |
| EDW2 | 2006 | 121 | 2 | 37 | 8.772  | P | 0.200 | 0.038  |
| MNRC | 2006 | 121 | 2 | 37 | 9.636  | P | 0.200 | 0.671  |
| S05C | 2006 | 121 | 2 | 37 | 9.639  | P | 0.200 | -0.195 |
| SN21 | 2006 | 121 | 2 | 37 | 10.086 | P | 0.200 | -0.372 |
| ISA  | 2006 | 121 | 2 | 37 | 10.122 | P | 0.200 | 0.280  |
| SN71 | 2006 | 121 | 2 | 37 | 10.130 | P | 0.200 | -0.306 |
| SN11 | 2006 | 121 | 2 | 37 | 10.183 | P | 0.200 | -0.342 |
| T06C | 2006 | 121 | 2 | 37 | 10.281 | P | 0.200 | -0.321 |
| SN51 | 2006 | 121 | 2 | 37 | 10.525 | P | 0.200 | 0.314  |
| BBR  | 2006 | 121 | 2 | 37 | 10.536 | P | 0.200 | 0.089  |
| R04C | 2006 | 121 | 2 | 37 | 10.633 | P | 0.200 | -0.351 |
| SN52 | 2006 | 121 | 2 | 37 | 11.000 | P | 0.200 | -0.394 |
| HELL | 2006 | 121 | 2 | 37 | 11.139 | P | 0.200 | -0.508 |
| SN62 | 2006 | 121 | 2 | 37 | 11.319 | P | 0.200 | -0.388 |
| SN22 | 2006 | 121 | 2 | 37 | 11.583 | P | 0.200 | -0.205 |
| SUTB | 2006 | 121 | 2 | 37 | 11.610 | P | 0.200 | -0.453 |
| LRL  | 2006 | 121 | 2 | 37 | 11.866 | P | 0.200 | 0.136  |
| SN73 | 2006 | 121 | 2 | 37 | 12.051 | P | 0.200 | -0.090 |
| SN53 | 2006 | 121 | 2 | 37 | 12.189 | P | 0.200 | -0.318 |
| SN23 | 2006 | 121 | 2 | 37 | 12.596 | P | 0.200 | -0.178 |
| S06C | 2006 | 121 | 2 | 37 | 12.915 | P | 0.200 | -0.381 |
| LAVA | 2006 | 121 | 2 | 37 | 13.298 | P | 0.200 | -0.045 |
| O02C | 2006 | 121 | 2 | 37 | 13.382 | P | 0.200 | 0.763  |
| SN54 | 2006 | 121 | 2 | 37 | 13.560 | P | 0.200 | -0.233 |
| SN44 | 2006 | 121 | 2 | 37 | 13.561 | P | 0.200 | -0.038 |
| N02C | 2006 | 121 | 2 | 37 | 13.696 | P | 0.200 | 0.359  |
| CWC  | 2006 | 121 | 2 | 37 | 13.741 | P | 0.200 | -0.164 |
| ORV  | 2006 | 121 | 2 | 37 | 13.781 | P | 0.200 | -0.144 |
| HEC  | 2006 | 121 | 2 | 37 | 13.818 | P | 0.200 | -0.007 |
| O03C | 2006 | 121 | 2 | 37 | 13.831 | P | 0.200 | 0.042  |
| GSC  | 2006 | 121 | 2 | 37 | 13.960 | P | 0.200 | 0.051  |
| SN85 | 2006 | 121 | 2 | 37 | 13.965 | P | 0.200 | -0.334 |
| MPM  | 2006 | 121 | 2 | 37 | 14.445 | P | 0.200 | 0.133  |
| WDC  | 2006 | 121 | 2 | 37 | 14.709 | P | 0.200 | 0.171  |
| SN55 | 2006 | 121 | 2 | 37 | 14.766 | P | 0.200 | -0.199 |
| SN25 | 2006 | 121 | 2 | 37 | 15.042 | P | 0.200 | -0.005 |
| SN15 | 2006 | 121 | 2 | 37 | 15.186 | P | 0.200 | 0.201  |
| TIN  | 2006 | 121 | 2 | 37 | 15.301 | P | 0.200 | 0.011  |
| SN76 | 2006 | 121 | 2 | 37 | 15.693 | P | 0.200 | -0.268 |
| P05C | 2006 | 121 | 2 | 37 | 15.775 | P | 0.200 | 0.103  |
| SN16 | 2006 | 121 | 2 | 37 | 16.343 | P | 0.200 | 0.015  |
| R07C | 2006 | 121 | 2 | 37 | 16.442 | P | 0.200 | 0.090  |

|      |      |     |   |    |        |   |       |        |
|------|------|-----|---|----|--------|---|-------|--------|
| R06C | 2006 | 121 | 2 | 37 | 16.708 | P | 0.200 | 0.243  |
| SN67 | 2006 | 121 | 2 | 37 | 16.738 | P | 0.200 | 0.160  |
| SN57 | 2006 | 121 | 2 | 37 | 16.855 | P | 0.200 | 0.195  |
| O05C | 2006 | 121 | 2 | 37 | 16.936 | P | 0.200 | 0.059  |
| SN47 | 2006 | 121 | 2 | 37 | 17.010 | P | 0.200 | 0.062  |
| SN37 | 2006 | 121 | 2 | 37 | 17.062 | P | 0.200 | 0.139  |
| M02C | 2006 | 121 | 2 | 37 | 17.290 | P | 0.200 | 0.757  |
| S08C | 2006 | 121 | 2 | 37 | 17.328 | P | 0.200 | 0.283  |
| SHO  | 2006 | 121 | 2 | 37 | 17.356 | P | 0.200 | -0.106 |
| TUQ  | 2006 | 121 | 2 | 37 | 17.377 | P | 0.200 | 0.187  |
| FUR  | 2006 | 121 | 2 | 37 | 17.416 | P | 0.200 | 0.213  |
| O04C | 2006 | 121 | 2 | 37 | 17.681 | P | 0.200 | -0.022 |
| SN48 | 2006 | 121 | 2 | 37 | 17.826 | P | 0.200 | -0.209 |
| GRA  | 2006 | 121 | 2 | 37 | 17.945 | P | 0.200 | 0.349  |
| M03C | 2006 | 121 | 2 | 37 | 18.076 | P | 0.200 | -0.178 |
| SN38 | 2006 | 121 | 2 | 37 | 18.141 | P | 0.200 | -0.016 |
| BEK  | 2006 | 121 | 2 | 37 | 18.165 | P | 0.200 | -0.248 |
| WCN  | 2006 | 121 | 2 | 37 | 18.270 | P | 0.200 | 0.129  |
| YBH  | 2006 | 121 | 2 | 37 | 18.492 | P | 0.200 | 0.401  |
| HATC | 2006 | 121 | 2 | 37 | 18.539 | P | 0.200 | 0.056  |
| SN28 | 2006 | 121 | 2 | 37 | 18.559 | P | 0.200 | 0.306  |
| R08A | 2006 | 121 | 2 | 37 | 19.570 | P | 0.200 | -0.236 |
| ELFS | 2006 | 121 | 2 | 37 | 19.861 | P | 0.200 | 0.108  |
| S09A | 2006 | 121 | 2 | 37 | 20.043 | P | 0.200 | -0.381 |
| O06A | 2006 | 121 | 2 | 37 | 20.524 | P | 0.200 | -0.239 |
| M04C | 2006 | 121 | 2 | 37 | 20.854 | P | 0.200 | 0.270  |
| M05C | 2006 | 121 | 2 | 37 | 21.064 | P | 0.200 | -0.058 |
| HUMO | 2006 | 121 | 2 | 37 | 21.115 | P | 0.200 | 0.622  |
| TPNV | 2006 | 121 | 2 | 37 | 21.189 | P | 0.200 | 0.286  |
| P07A | 2006 | 121 | 2 | 37 | 21.391 | P | 0.200 | -0.025 |
| TPH  | 2006 | 121 | 2 | 37 | 21.412 | P | 0.200 | -0.158 |
| Q08A | 2006 | 121 | 2 | 37 | 21.615 | P | 0.200 | -0.390 |
| J02A | 2006 | 121 | 2 | 37 | 21.812 | P | 0.200 | 0.439  |
| DBO  | 2006 | 121 | 2 | 37 | 21.893 | P | 0.200 | 0.404  |
| M06C | 2006 | 121 | 2 | 37 | 22.385 | P | 0.200 | 0.010  |
| O07A | 2006 | 121 | 2 | 37 | 23.031 | P | 0.200 | -0.429 |
| J03A | 2006 | 121 | 2 | 37 | 23.607 | P | 0.200 | 0.783  |
| Q09A | 2006 | 121 | 2 | 37 | 23.870 | P | 0.200 | -0.092 |
| P08A | 2006 | 121 | 2 | 37 | 24.299 | P | 0.200 | 0.058  |
| N07B | 2006 | 121 | 2 | 37 | 24.801 | P | 0.200 | -0.229 |
| O08A | 2006 | 121 | 2 | 37 | 25.716 | P | 0.200 | -0.122 |
| P09A | 2006 | 121 | 2 | 37 | 26.165 | P | 0.200 | -0.157 |
| M07A | 2006 | 121 | 2 | 37 | 26.500 | P | 0.200 | -0.037 |
| N08A | 2006 | 121 | 2 | 37 | 27.159 | P | 0.200 | -0.180 |
| O09A | 2006 | 121 | 2 | 37 | 27.980 | P | 0.200 | -0.053 |
| BMN  | 2006 | 121 | 2 | 37 | 28.599 | P | 0.200 | -0.179 |

|      |      |     |   |         |           |            |         |        |       |
|------|------|-----|---|---------|-----------|------------|---------|--------|-------|
| 2005 | 306  | 3   | 9 | 19.2121 | -30.39000 | -178.16901 | 36.0000 | 32     | 0.003 |
| SNCC | 2005 | 306 | 3 | 21      | 46.738    | P          | 0.200   | 0.139  |       |
| SCZ2 | 2005 | 306 | 3 | 21      | 48.777    | P          | 0.200   | 0.141  |       |
| CIA  | 2005 | 306 | 3 | 21      | 50.222    | P          | 0.200   | -0.520 |       |
| SBC  | 2005 | 306 | 3 | 21      | 50.288    | P          | 0.200   | 0.258  |       |
| LGU  | 2005 | 306 | 3 | 21      | 50.555    | P          | 0.200   | -0.410 |       |
| V04C | 2005 | 306 | 3 | 21      | 50.685    | P          | 0.200   | 0.134  |       |
| HAST | 2005 | 306 | 3 | 21      | 51.224    | P          | 0.200   | 0.209  |       |
| PHL  | 2005 | 306 | 3 | 21      | 51.317    | P          | 0.200   | 0.578  |       |
| FARB | 2005 | 306 | 3 | 21      | 51.392    | P          | 0.200   | 0.097  |       |
| MPP  | 2005 | 306 | 3 | 21      | 51.650    | P          | 0.200   | 0.308  |       |
| BNLO | 2005 | 306 | 3 | 21      | 51.803    | P          | 0.200   | -0.052 |       |
| FMP  | 2005 | 306 | 3 | 21      | 51.872    | P          | 0.200   | -0.090 |       |
| TOV  | 2005 | 306 | 3 | 21      | 52.017    | P          | 0.200   | 0.298  |       |
| RPV  | 2005 | 306 | 3 | 21      | 52.082    | P          | 0.200   | 0.236  |       |
| JRSC | 2005 | 306 | 3 | 21      | 52.511    | P          | 0.200   | 0.055  |       |

|      |      |     |   |    |        |   |       |        |
|------|------|-----|---|----|--------|---|-------|--------|
| SMM  | 2005 | 306 | 3 | 21 | 52.588 | P | 0.200 | 0.406  |
| PKD  | 2005 | 306 | 3 | 21 | 52.605 | P | 0.200 | 0.134  |
| SAO  | 2005 | 306 | 3 | 21 | 52.724 | P | 0.200 | -0.028 |
| DJJ  | 2005 | 306 | 3 | 21 | 52.973 | P | 0.200 | 0.272  |
| DEC  | 2005 | 306 | 3 | 21 | 53.129 | P | 0.200 | -0.440 |
| U04C | 2005 | 306 | 3 | 21 | 53.816 | P | 0.200 | 0.608  |
| PAS  | 2005 | 306 | 3 | 21 | 53.932 | P | 0.200 | 0.221  |
| BRK  | 2005 | 306 | 3 | 21 | 54.121 | P | 0.200 | 0.072  |
| BKS  | 2005 | 306 | 3 | 21 | 54.251 | P | 0.200 | 0.036  |
| PACP | 2005 | 306 | 3 | 21 | 54.307 | P | 0.200 | 0.240  |
| MHC  | 2005 | 306 | 3 | 21 | 54.384 | P | 0.200 | 0.050  |
| BRIB | 2005 | 306 | 3 | 21 | 54.633 | P | 0.200 | 0.148  |
| MWC  | 2005 | 306 | 3 | 21 | 54.775 | P | 0.200 | 0.154  |
| ARV  | 2005 | 306 | 3 | 21 | 54.850 | P | 0.200 | 0.033  |
| WENL | 2005 | 306 | 3 | 21 | 54.871 | P | 0.200 | 0.299  |
| CVS  | 2005 | 306 | 3 | 21 | 54.900 | P | 0.200 | -0.407 |
| V05C | 2005 | 306 | 3 | 21 | 54.969 | P | 0.200 | 0.817  |
| CHF  | 2005 | 306 | 3 | 21 | 55.183 | P | 0.200 | 0.269  |
| VCS  | 2005 | 306 | 3 | 21 | 55.342 | P | 0.200 | 0.304  |
| BFS  | 2005 | 306 | 3 | 21 | 55.548 | P | 0.200 | -0.167 |
| U05C | 2005 | 306 | 3 | 21 | 55.601 | P | 0.200 | 0.609  |
| BDM  | 2005 | 306 | 3 | 21 | 55.652 | P | 0.200 | 0.257  |
| S04C | 2005 | 306 | 3 | 21 | 55.681 | P | 0.200 | 0.121  |
| HOPS | 2005 | 306 | 3 | 21 | 55.712 | P | 0.200 | 0.031  |
| T05C | 2005 | 306 | 3 | 21 | 55.982 | P | 0.200 | 0.554  |
| VES  | 2005 | 306 | 3 | 21 | 56.095 | P | 0.200 | -0.284 |
| P01C | 2005 | 306 | 3 | 21 | 56.747 | P | 0.200 | 0.090  |
| EDW2 | 2005 | 306 | 3 | 21 | 56.812 | P | 0.200 | 0.137  |
| RCT  | 2005 | 306 | 3 | 21 | 56.856 | P | 0.200 | -0.695 |
| MNRC | 2005 | 306 | 3 | 21 | 57.476 | P | 0.200 | 0.357  |
| SVD  | 2005 | 306 | 3 | 21 | 57.739 | P | 0.200 | 0.639  |
| ISA  | 2005 | 306 | 3 | 21 | 58.017 | P | 0.200 | 0.223  |
| VTV  | 2005 | 306 | 3 | 21 | 58.039 | P | 0.200 | 0.344  |
| SN71 | 2005 | 306 | 3 | 21 | 58.049 | P | 0.200 | -0.422 |
| SN11 | 2005 | 306 | 3 | 21 | 58.051 | P | 0.200 | -0.447 |
| Q03C | 2005 | 306 | 3 | 21 | 58.207 | P | 0.200 | 0.944  |
| T06C | 2005 | 306 | 3 | 21 | 58.222 | P | 0.200 | -0.387 |
| SN51 | 2005 | 306 | 3 | 21 | 58.337 | P | 0.200 | 0.102  |
| R04C | 2005 | 306 | 3 | 21 | 58.461 | P | 0.200 | -0.553 |
| BBR  | 2005 | 306 | 3 | 21 | 58.531 | P | 0.200 | 0.223  |
| SN52 | 2005 | 306 | 3 | 21 | 58.875 | P | 0.200 | -0.500 |
| HELL | 2005 | 306 | 3 | 21 | 59.024 | P | 0.200 | -0.564 |
| SN62 | 2005 | 306 | 3 | 21 | 59.146 | P | 0.200 | -0.551 |
| SUTB | 2005 | 306 | 3 | 21 | 59.394 | P | 0.200 | -0.721 |
| Q04C | 2005 | 306 | 3 | 21 | 59.395 | P | 0.200 | -0.308 |
| SN22 | 2005 | 306 | 3 | 21 | 59.432 | P | 0.200 | -0.319 |
| CMB  | 2005 | 306 | 3 | 21 | 59.648 | P | 0.200 | -0.304 |
| RRX  | 2005 | 306 | 3 | 21 | 59.699 | P | 0.200 | -0.014 |
| LRL  | 2005 | 306 | 3 | 21 | 59.724 | P | 0.200 | 0.130  |
| SN73 | 2005 | 306 | 3 | 21 | 59.820 | P | 0.200 | -0.293 |
| GASB | 2005 | 306 | 3 | 21 | 59.895 | P | 0.200 | 0.881  |
| SN53 | 2005 | 306 | 3 | 21 | 59.982 | P | 0.200 | -0.480 |
| SN84 | 2005 | 306 | 3 | 22 | 0.415  | P | 0.200 | -0.840 |
| SN23 | 2005 | 306 | 3 | 22 | 0.467  | P | 0.200 | -0.239 |
| SN43 | 2005 | 306 | 3 | 22 | 0.491  | P | 0.200 | -0.260 |
| S06C | 2005 | 306 | 3 | 22 | 0.695  | P | 0.200 | -0.550 |
| SN95 | 2005 | 306 | 3 | 22 | 0.951  | P | 0.200 | -0.592 |
| LAVA | 2005 | 306 | 3 | 22 | 1.052  | P | 0.200 | -0.254 |
| SN54 | 2005 | 306 | 3 | 22 | 1.410  | P | 0.200 | -0.297 |
| N02C | 2005 | 306 | 3 | 22 | 1.429  | P | 0.200 | 0.042  |
| SN44 | 2005 | 306 | 3 | 22 | 1.453  | P | 0.200 | -0.046 |
| ORV  | 2005 | 306 | 3 | 22 | 1.542  | P | 0.200 | -0.366 |
| SN64 | 2005 | 306 | 3 | 22 | 1.554  | P | 0.200 | -0.217 |

|      |      |     |   |    |       |   |       |        |
|------|------|-----|---|----|-------|---|-------|--------|
| O03C | 2005 | 306 | 3 | 22 | 1.558 | P | 0.200 | -0.223 |
| CWC  | 2005 | 306 | 3 | 22 | 1.572 | P | 0.200 | -0.176 |
| HEC  | 2005 | 306 | 3 | 22 | 1.643 | P | 0.200 | 0.088  |
| GSC  | 2005 | 306 | 3 | 22 | 1.813 | P | 0.200 | 0.140  |
| SN85 | 2005 | 306 | 3 | 22 | 1.815 | P | 0.200 | -0.398 |
| SN34 | 2005 | 306 | 3 | 22 | 2.060 | P | 0.200 | 0.079  |
| SN14 | 2005 | 306 | 3 | 22 | 2.269 | P | 0.200 | 0.261  |
| MPM  | 2005 | 306 | 3 | 22 | 2.327 | P | 0.200 | 0.225  |
| WDC  | 2005 | 306 | 3 | 22 | 2.527 | P | 0.200 | -0.002 |
| SN55 | 2005 | 306 | 3 | 22 | 2.575 | P | 0.200 | -0.272 |
| SN75 | 2005 | 306 | 3 | 22 | 2.617 | P | 0.200 | -0.054 |
| SLA  | 2005 | 306 | 3 | 22 | 2.702 | P | 0.200 | 0.442  |
| SN65 | 2005 | 306 | 3 | 22 | 2.868 | P | 0.200 | 0.057  |
| SN15 | 2005 | 306 | 3 | 22 | 2.905 | P | 0.200 | 0.080  |
| SN25 | 2005 | 306 | 3 | 22 | 2.917 | P | 0.200 | 0.023  |
| R05C | 2005 | 306 | 3 | 22 | 3.085 | P | 0.200 | -0.204 |
| TIN  | 2005 | 306 | 3 | 22 | 3.089 | P | 0.200 | -0.021 |
| SN86 | 2005 | 306 | 3 | 22 | 3.239 | P | 0.200 | -0.201 |
| P05C | 2005 | 306 | 3 | 22 | 3.445 | P | 0.200 | -0.122 |
| SN56 | 2005 | 306 | 3 | 22 | 3.479 | P | 0.200 | -0.072 |
| SN66 | 2005 | 306 | 3 | 22 | 3.613 | P | 0.200 | -0.088 |
| SN46 | 2005 | 306 | 3 | 22 | 3.665 | P | 0.200 | -0.142 |
| MLAC | 2005 | 306 | 3 | 22 | 3.860 | P | 0.200 | 0.621  |
| SN36 | 2005 | 306 | 3 | 22 | 4.057 | P | 0.200 | 0.057  |
| SN26 | 2005 | 306 | 3 | 22 | 4.250 | P | 0.200 | 0.277  |
| SN67 | 2005 | 306 | 3 | 22 | 4.373 | P | 0.200 | -0.014 |
| SN57 | 2005 | 306 | 3 | 22 | 4.479 | P | 0.200 | 0.021  |
| O05C | 2005 | 306 | 3 | 22 | 4.516 | P | 0.200 | -0.209 |
| SN47 | 2005 | 306 | 3 | 22 | 4.618 | P | 0.200 | -0.115 |
| SN37 | 2005 | 306 | 3 | 22 | 4.712 | P | 0.200 | 0.014  |
| SHO  | 2005 | 306 | 3 | 22 | 5.016 | P | 0.200 | -0.063 |
| TUQ  | 2005 | 306 | 3 | 22 | 5.027 | P | 0.200 | 0.225  |
| M02C | 2005 | 306 | 3 | 22 | 5.039 | P | 0.200 | 0.589  |
| FUR  | 2005 | 306 | 3 | 22 | 5.159 | P | 0.200 | 0.300  |
| O04C | 2005 | 306 | 3 | 22 | 5.289 | P | 0.200 | -0.240 |
| SN48 | 2005 | 306 | 3 | 22 | 5.439 | P | 0.200 | -0.331 |
| GRA  | 2005 | 306 | 3 | 22 | 5.659 | P | 0.200 | 0.385  |
| SN38 | 2005 | 306 | 3 | 22 | 5.737 | P | 0.200 | -0.125 |
| M03C | 2005 | 306 | 3 | 22 | 5.748 | P | 0.200 | -0.351 |
| HATC | 2005 | 306 | 3 | 22 | 6.134 | P | 0.200 | -0.165 |
| SN28 | 2005 | 306 | 3 | 22 | 6.143 | P | 0.200 | 0.193  |
| MNV  | 2005 | 306 | 3 | 22 | 7.434 | P | 0.200 | -0.082 |
| M04C | 2005 | 306 | 3 | 22 | 8.330 | P | 0.200 | 0.008  |
| M05C | 2005 | 306 | 3 | 22 | 8.608 | P | 0.200 | -0.217 |
| HUMO | 2005 | 306 | 3 | 22 | 8.720 | P | 0.200 | 0.453  |
| TPH  | 2005 | 306 | 3 | 22 | 8.951 | P | 0.200 | -0.147 |
| M06C | 2005 | 306 | 3 | 22 | 9.921 | P | 0.200 | -0.087 |

|      |      |     |    |         |           |            |          |        |        |
|------|------|-----|----|---------|-----------|------------|----------|--------|--------|
| 2006 | 136  | 10  | 39 | 26.6118 | -31.77900 | -179.31300 | 151.6000 | 128    | -0.005 |
| SNCC | 2006 | 136 | 10 | 51      | 48.987    | P          | 0.200    | 0.088  |        |
| SDP  | 2006 | 136 | 10 | 51      | 50.517    | P          | 0.200    | 0.098  |        |
| SCZ2 | 2006 | 136 | 10 | 51      | 50.876    | P          | 0.200    | -0.007 |        |
| SBC  | 2006 | 136 | 10 | 51      | 52.356    | P          | 0.200    | 0.104  |        |
| CIA  | 2006 | 136 | 10 | 51      | 52.381    | P          | 0.200    | -0.522 |        |
| LGU  | 2006 | 136 | 10 | 51      | 52.727    | P          | 0.200    | -0.420 |        |
| V04C | 2006 | 136 | 10 | 51      | 52.917    | P          | 0.200    | 0.129  |        |
| V03C | 2006 | 136 | 10 | 51      | 53.263    | P          | 0.200    | 0.409  |        |
| HAST | 2006 | 136 | 10 | 51      | 53.402    | P          | 0.200    | 0.148  |        |
| FARB | 2006 | 136 | 10 | 51      | 53.483    | P          | 0.200    | -0.064 |        |
| MPP  | 2006 | 136 | 10 | 51      | 53.834    | P          | 0.200    | 0.304  |        |
| BNLO | 2006 | 136 | 10 | 51      | 53.917    | P          | 0.200    | -0.167 |        |
| FMP  | 2006 | 136 | 10 | 51      | 54.033    | P          | 0.200    | -0.057 |        |
| SMM  | 2006 | 136 | 10 | 51      | 54.596    | P          | 0.200    | 0.249  |        |



|      |      |     |    |    |        |   |       |        |
|------|------|-----|----|----|--------|---|-------|--------|
| JRSC | 2006 | 136 | 10 | 51 | 54.646 | P | 0.200 | -0.018 |
| DJJ  | 2006 | 136 | 10 | 51 | 54.662 | P | 0.200 | -0.154 |
| PKD  | 2006 | 136 | 10 | 51 | 54.709 | P | 0.200 | 0.060  |
| SAO  | 2006 | 136 | 10 | 51 | 54.832 | P | 0.200 | -0.111 |
| MCCM | 2006 | 136 | 10 | 51 | 55.205 | P | 0.200 | -0.149 |
| DEC  | 2006 | 136 | 10 | 51 | 55.334 | P | 0.200 | -0.311 |
| OSI  | 2006 | 136 | 10 | 51 | 55.748 | P | 0.200 | -0.138 |
| U04C | 2006 | 136 | 10 | 51 | 55.949 | P | 0.200 | 0.584  |
| BRK  | 2006 | 136 | 10 | 51 | 56.147 | P | 0.200 | -0.050 |
| PACP | 2006 | 136 | 10 | 51 | 56.422 | P | 0.200 | 0.225  |
| BKS  | 2006 | 136 | 10 | 51 | 56.423 | P | 0.200 | 0.057  |
| MWC  | 2006 | 136 | 10 | 51 | 56.444 | P | 0.200 | -0.212 |
| MHC  | 2006 | 136 | 10 | 51 | 56.451 | P | 0.200 | -0.018 |
| BRIB | 2006 | 136 | 10 | 51 | 56.738 | P | 0.200 | 0.135  |
| CHF  | 2006 | 136 | 10 | 51 | 56.834 | P | 0.200 | -0.099 |
| V05C | 2006 | 136 | 10 | 51 | 56.847 | P | 0.200 | 0.600  |
| WENL | 2006 | 136 | 10 | 51 | 56.916 | P | 0.200 | 0.225  |
| ARV  | 2006 | 136 | 10 | 51 | 56.971 | P | 0.200 | 0.116  |
| CVS  | 2006 | 136 | 10 | 51 | 56.987 | P | 0.200 | -0.427 |
| U05C | 2006 | 136 | 10 | 51 | 57.500 | P | 0.200 | 0.440  |
| BFS  | 2006 | 136 | 10 | 51 | 57.659 | P | 0.200 | -0.030 |
| S04C | 2006 | 136 | 10 | 51 | 57.738 | P | 0.200 | 0.100  |
| BDM  | 2006 | 136 | 10 | 51 | 57.767 | P | 0.200 | 0.284  |
| HOPS | 2006 | 136 | 10 | 51 | 57.936 | P | 0.200 | 0.163  |
| VES  | 2006 | 136 | 10 | 51 | 58.067 | P | 0.200 | -0.293 |
| EDW2 | 2006 | 136 | 10 | 51 | 58.748 | P | 0.200 | 0.124  |
| RCT  | 2006 | 136 | 10 | 51 | 58.796 | P | 0.200 | -0.702 |
| P01C | 2006 | 136 | 10 | 51 | 58.890 | P | 0.200 | 0.170  |
| S05C | 2006 | 136 | 10 | 51 | 59.480 | P | 0.200 | -0.363 |
| ADO  | 2006 | 136 | 10 | 51 | 59.487 | P | 0.200 | 0.036  |
| MNRC | 2006 | 136 | 10 | 51 | 59.492 | P | 0.200 | 0.346  |
| SN21 | 2006 | 136 | 10 | 51 | 59.937 | P | 0.200 | -0.434 |
| ISA  | 2006 | 136 | 10 | 51 | 59.981 | P | 0.200 | 0.264  |
| SN11 | 2006 | 136 | 10 | 52 | 0.008  | P | 0.200 | -0.404 |
| SN71 | 2006 | 136 | 10 | 52 | 0.031  | P | 0.200 | -0.376 |
| Q03C | 2006 | 136 | 10 | 52 | 0.056  | P | 0.200 | 0.782  |
| O01C | 2006 | 136 | 10 | 52 | 0.110  | P | 0.200 | 0.436  |
| T06C | 2006 | 136 | 10 | 52 | 0.192  | P | 0.200 | -0.346 |
| SN51 | 2006 | 136 | 10 | 52 | 0.272  | P | 0.200 | 0.094  |
| BBR  | 2006 | 136 | 10 | 52 | 0.440  | P | 0.200 | 0.280  |
| R04C | 2006 | 136 | 10 | 52 | 0.635  | P | 0.200 | -0.310 |
| SN52 | 2006 | 136 | 10 | 52 | 0.873  | P | 0.200 | -0.407 |
| HELL | 2006 | 136 | 10 | 52 | 1.000  | P | 0.200 | -0.469 |
| SN62 | 2006 | 136 | 10 | 52 | 1.091  | P | 0.200 | -0.503 |
| SUTB | 2006 | 136 | 10 | 52 | 1.354  | P | 0.200 | -0.681 |
| Q04C | 2006 | 136 | 10 | 52 | 1.554  | P | 0.200 | -0.071 |
| RRX  | 2006 | 136 | 10 | 52 | 1.611  | P | 0.200 | 0.081  |
| CMB  | 2006 | 136 | 10 | 52 | 1.639  | P | 0.200 | -0.216 |
| JCC  | 2006 | 136 | 10 | 52 | 1.707  | P | 0.200 | 0.287  |
| LRL  | 2006 | 136 | 10 | 52 | 1.712  | P | 0.200 | 0.276  |
| SN73 | 2006 | 136 | 10 | 52 | 1.753  | P | 0.200 | -0.256 |
| GASB | 2006 | 136 | 10 | 52 | 1.849  | P | 0.200 | 0.868  |
| SN23 | 2006 | 136 | 10 | 52 | 2.323  | P | 0.200 | -0.251 |
| SN84 | 2006 | 136 | 10 | 52 | 2.474  | P | 0.200 | -0.644 |
| S06C | 2006 | 136 | 10 | 52 | 2.650  | P | 0.200 | -0.450 |
| LAVA | 2006 | 136 | 10 | 52 | 2.964  | P | 0.200 | -0.208 |
| O02C | 2006 | 136 | 10 | 52 | 3.038  | P | 0.200 | 0.438  |
| SN54 | 2006 | 136 | 10 | 52 | 3.348  | P | 0.200 | -0.188 |
| SN64 | 2006 | 136 | 10 | 52 | 3.394  | P | 0.200 | -0.212 |
| O03C | 2006 | 136 | 10 | 52 | 3.426  | P | 0.200 | -0.218 |
| SN44 | 2006 | 136 | 10 | 52 | 3.438  | P | 0.200 | 0.101  |
| HEC  | 2006 | 136 | 10 | 52 | 3.541  | P | 0.200 | 0.235  |
| ORV  | 2006 | 136 | 10 | 52 | 3.554  | P | 0.200 | -0.214 |

|      |      |     |    |    |        |   |       |        |
|------|------|-----|----|----|--------|---|-------|--------|
| N02C | 2006 | 136 | 10 | 52 | 3.572  | P | 0.200 | 0.291  |
| CWC  | 2006 | 136 | 10 | 52 | 3.576  | P | 0.200 | 0.020  |
| GSC  | 2006 | 136 | 10 | 52 | 3.676  | P | 0.200 | 0.241  |
| SN85 | 2006 | 136 | 10 | 52 | 3.701  | P | 0.200 | -0.340 |
| MPM  | 2006 | 136 | 10 | 52 | 4.206  | P | 0.200 | 0.331  |
| WDC  | 2006 | 136 | 10 | 52 | 4.340  | P | 0.200 | -0.042 |
| SN55 | 2006 | 136 | 10 | 52 | 4.441  | P | 0.200 | -0.203 |
| SN25 | 2006 | 136 | 10 | 52 | 4.668  | P | 0.200 | -0.007 |
| SN15 | 2006 | 136 | 10 | 52 | 4.853  | P | 0.200 | 0.249  |
| TIN  | 2006 | 136 | 10 | 52 | 4.924  | P | 0.200 | 0.057  |
| P05C | 2006 | 136 | 10 | 52 | 5.370  | P | 0.200 | 0.000  |
| SN76 | 2006 | 136 | 10 | 52 | 5.376  | P | 0.200 | -0.223 |
| SN66 | 2006 | 136 | 10 | 52 | 5.417  | P | 0.200 | -0.057 |
| SN46 | 2006 | 136 | 10 | 52 | 5.609  | P | 0.200 | 0.025  |
| R07C | 2006 | 136 | 10 | 52 | 5.875  | P | 0.200 | -0.064 |
| SN16 | 2006 | 136 | 10 | 52 | 5.926  | P | 0.200 | 0.050  |
| SN26 | 2006 | 136 | 10 | 52 | 6.029  | P | 0.200 | 0.300  |
| R06C | 2006 | 136 | 10 | 52 | 6.154  | P | 0.200 | 0.095  |
| SN67 | 2006 | 136 | 10 | 52 | 6.262  | P | 0.200 | 0.109  |
| SN57 | 2006 | 136 | 10 | 52 | 6.263  | P | 0.200 | 0.042  |
| SN47 | 2006 | 136 | 10 | 52 | 6.495  | P | 0.200 | 0.006  |
| O05C | 2006 | 136 | 10 | 52 | 6.527  | P | 0.200 | 0.007  |
| SN37 | 2006 | 136 | 10 | 52 | 6.535  | P | 0.200 | 0.089  |
| SHO  | 2006 | 136 | 10 | 52 | 6.821  | P | 0.200 | 0.056  |
| S08C | 2006 | 136 | 10 | 52 | 6.822  | P | 0.200 | 0.283  |
| TUQ  | 2006 | 136 | 10 | 52 | 6.874  | P | 0.200 | 0.396  |
| M02C | 2006 | 136 | 10 | 52 | 6.875  | P | 0.200 | 0.606  |
| FUR  | 2006 | 136 | 10 | 52 | 6.882  | P | 0.200 | 0.323  |
| O04C | 2006 | 136 | 10 | 52 | 7.144  | P | 0.200 | -0.176 |
| GRA  | 2006 | 136 | 10 | 52 | 7.295  | P | 0.200 | 0.303  |
| SN48 | 2006 | 136 | 10 | 52 | 7.300  | P | 0.200 | -0.214 |
| K01A | 2006 | 136 | 10 | 52 | 7.407  | P | 0.200 | 0.596  |
| M03C | 2006 | 136 | 10 | 52 | 7.459  | P | 0.200 | -0.432 |
| L02A | 2006 | 136 | 10 | 52 | 7.464  | P | 0.200 | 0.466  |
| SN38 | 2006 | 136 | 10 | 52 | 7.592  | P | 0.200 | -0.008 |
| BEK  | 2006 | 136 | 10 | 52 | 7.671  | P | 0.200 | -0.304 |
| WCN  | 2006 | 136 | 10 | 52 | 7.754  | P | 0.200 | 0.083  |
| HATC | 2006 | 136 | 10 | 52 | 7.836  | P | 0.200 | -0.244 |
| SN28 | 2006 | 136 | 10 | 52 | 7.843  | P | 0.200 | 0.157  |
| YBH  | 2006 | 136 | 10 | 52 | 8.044  | P | 0.200 | 0.311  |
| P06A | 2006 | 136 | 10 | 52 | 8.373  | P | 0.200 | -0.131 |
| Q07A | 2006 | 136 | 10 | 52 | 8.929  | P | 0.200 | -0.021 |
| R08A | 2006 | 136 | 10 | 52 | 8.985  | P | 0.200 | -0.178 |
| MNV  | 2006 | 136 | 10 | 52 | 9.118  | P | 0.200 | -0.113 |
| ELFS | 2006 | 136 | 10 | 52 | 9.166  | P | 0.200 | -0.082 |
| S09A | 2006 | 136 | 10 | 52 | 9.723  | P | 0.200 | 0.047  |
| O06A | 2006 | 136 | 10 | 52 | 9.846  | P | 0.200 | -0.312 |
| M04C | 2006 | 136 | 10 | 52 | 10.110 | P | 0.200 | 0.033  |
| M05C | 2006 | 136 | 10 | 52 | 10.328 | P | 0.200 | -0.237 |
| HUMO | 2006 | 136 | 10 | 52 | 10.409 | P | 0.200 | 0.374  |
| TPH  | 2006 | 136 | 10 | 52 | 10.602 | P | 0.200 | -0.169 |
| P07A | 2006 | 136 | 10 | 52 | 10.641 | P | 0.200 | -0.101 |
| Q08A | 2006 | 136 | 10 | 52 | 10.988 | P | 0.200 | -0.264 |
| DBO  | 2006 | 136 | 10 | 52 | 11.099 | P | 0.200 | 0.131  |
| J02A | 2006 | 136 | 10 | 52 | 11.123 | P | 0.200 | 0.257  |
| M06C | 2006 | 136 | 10 | 52 | 11.621 | P | 0.200 | -0.108 |
| O07A | 2006 | 136 | 10 | 52 | 12.259 | P | 0.200 | -0.462 |
| J03A | 2006 | 136 | 10 | 52 | 12.841 | P | 0.200 | 0.601  |
| Q09A | 2006 | 136 | 10 | 52 | 13.030 | P | 0.200 | -0.061 |
| P08A | 2006 | 136 | 10 | 52 | 13.361 | P | 0.200 | -0.078 |
| I03A | 2006 | 136 | 10 | 52 | 13.717 | P | 0.200 | 0.073  |
| N07B | 2006 | 136 | 10 | 52 | 14.039 | P | 0.200 | -0.190 |
| O08A | 2006 | 136 | 10 | 52 | 14.898 | P | 0.200 | -0.081 |

|      |      |     |    |    |        |   |       |        |
|------|------|-----|----|----|--------|---|-------|--------|
| P09A | 2006 | 136 | 10 | 52 | 15.178 | P | 0.200 | -0.221 |
| M07A | 2006 | 136 | 10 | 52 | 15.669 | P | 0.200 | -0.043 |
| N08A | 2006 | 136 | 10 | 52 | 16.413 | P | 0.200 | -0.041 |
| O09A | 2006 | 136 | 10 | 52 | 17.121 | P | 0.200 | 0.039  |

|      |     |    |    |         |           |            |         |     |       |
|------|-----|----|----|---------|-----------|------------|---------|-----|-------|
| 2006 | 281 | 13 | 50 | 25.3425 | -23.55400 | -175.27100 | 10.0000 | 229 | 0.001 |
|------|-----|----|----|---------|-----------|------------|---------|-----|-------|

|      |      |     |    |   |        |   |       |        |
|------|------|-----|----|---|--------|---|-------|--------|
| SNCC | 2006 | 281 | 14 | 2 | 21.577 | P | 0.200 | 0.108  |
| SCZ2 | 2006 | 281 | 14 | 2 | 23.508 | P | 0.200 | -0.047 |
| SBC  | 2006 | 281 | 14 | 2 | 24.991 | P | 0.200 | 0.053  |
| RAMR | 2006 | 281 | 14 | 2 | 25.229 | P | 0.200 | 0.115  |
| FARB | 2006 | 281 | 14 | 2 | 25.368 | P | 0.200 | 0.074  |
| V03C | 2006 | 281 | 14 | 2 | 25.421 | P | 0.200 | 0.327  |
| PHL  | 2006 | 281 | 14 | 2 | 25.524 | P | 0.200 | 0.105  |
| CIA  | 2006 | 281 | 14 | 2 | 25.719 | P | 0.200 | -0.433 |
| HAST | 2006 | 281 | 14 | 2 | 25.736 | P | 0.200 | 0.332  |
| BNLO | 2006 | 281 | 14 | 2 | 26.077 | P | 0.200 | -0.029 |
| TOV  | 2006 | 281 | 14 | 2 | 26.658 | P | 0.200 | -0.391 |
| MPP  | 2006 | 281 | 14 | 2 | 26.669 | P | 0.200 | 0.363  |
| JRSC | 2006 | 281 | 14 | 2 | 26.959 | P | 0.200 | 0.222  |
| RPV  | 2006 | 281 | 14 | 2 | 27.023 | P | 0.200 | -0.288 |
| FMP  | 2006 | 281 | 14 | 2 | 27.262 | P | 0.200 | -0.226 |
| SMM  | 2006 | 281 | 14 | 2 | 27.334 | P | 0.200 | 0.231  |
| SAO  | 2006 | 281 | 14 | 2 | 27.340 | P | 0.200 | 0.090  |
| PKD  | 2006 | 281 | 14 | 2 | 27.349 | P | 0.200 | 0.100  |
| MCCM | 2006 | 281 | 14 | 2 | 27.360 | P | 0.200 | 0.028  |
| DJJ  | 2006 | 281 | 14 | 2 | 27.932 | P | 0.200 | -0.270 |
| BRK  | 2006 | 281 | 14 | 2 | 28.502 | P | 0.200 | 0.097  |
| U04C | 2006 | 281 | 14 | 2 | 28.620 | P | 0.200 | 0.659  |
| BKS  | 2006 | 281 | 14 | 2 | 28.744 | P | 0.200 | 0.167  |
| PACP | 2006 | 281 | 14 | 2 | 28.898 | P | 0.200 | 0.216  |
| OSI  | 2006 | 281 | 14 | 2 | 28.976 | P | 0.200 | -0.227 |
| DEC  | 2006 | 281 | 14 | 2 | 29.014 | P | 0.200 | -0.131 |
| MHC  | 2006 | 281 | 14 | 2 | 29.030 | P | 0.200 | 0.188  |
| PAS  | 2006 | 281 | 14 | 2 | 29.182 | P | 0.200 | -0.163 |
| SDD  | 2006 | 281 | 14 | 2 | 29.186 | P | 0.200 | 0.072  |
| BRIB | 2006 | 281 | 14 | 2 | 29.219 | P | 0.200 | 0.326  |
| CVS  | 2006 | 281 | 14 | 2 | 29.392 | P | 0.200 | -0.263 |
| WENL | 2006 | 281 | 14 | 2 | 29.420 | P | 0.200 | 0.314  |
| V05C | 2006 | 281 | 14 | 2 | 29.792 | P | 0.200 | 0.592  |
| HOPS | 2006 | 281 | 14 | 2 | 29.984 | P | 0.200 | 0.066  |
| MWC  | 2006 | 281 | 14 | 2 | 30.037 | P | 0.200 | -0.278 |
| U05C | 2006 | 281 | 14 | 2 | 30.399 | P | 0.200 | 0.370  |
| ARV  | 2006 | 281 | 14 | 2 | 30.412 | P | 0.200 | 0.130  |
| S04C | 2006 | 281 | 14 | 2 | 30.445 | P | 0.200 | 0.208  |
| BDM  | 2006 | 281 | 14 | 2 | 30.518 | P | 0.200 | 0.582  |
| CHF  | 2006 | 281 | 14 | 2 | 30.523 | P | 0.200 | -0.134 |
| VCS  | 2006 | 281 | 14 | 2 | 30.657 | P | 0.200 | -0.072 |
| T05C | 2006 | 281 | 14 | 2 | 30.675 | P | 0.200 | 0.394  |
| P01C | 2006 | 281 | 14 | 2 | 31.015 | P | 0.200 | 0.124  |
| BFS  | 2006 | 281 | 14 | 2 | 31.252 | P | 0.200 | -0.350 |
| VES  | 2006 | 281 | 14 | 2 | 31.388 | P | 0.200 | -0.409 |
| O01C | 2006 | 281 | 14 | 2 | 32.080 | P | 0.200 | 0.244  |
| MNRC | 2006 | 281 | 14 | 2 | 32.085 | P | 0.200 | 0.498  |
| RCT  | 2006 | 281 | 14 | 2 | 32.345 | P | 0.200 | -0.615 |
| EDW2 | 2006 | 281 | 14 | 2 | 32.432 | P | 0.200 | -0.056 |
| S05C | 2006 | 281 | 14 | 2 | 32.598 | P | 0.200 | -0.373 |
| Q03C | 2006 | 281 | 14 | 2 | 32.796 | P | 0.200 | 0.925  |
| SVD  | 2006 | 281 | 14 | 2 | 33.146 | P | 0.200 | -0.084 |
| ADO  | 2006 | 281 | 14 | 2 | 33.335 | P | 0.200 | -0.227 |
| VTV  | 2006 | 281 | 14 | 2 | 33.585 | P | 0.200 | -0.189 |
| ISA  | 2006 | 281 | 14 | 2 | 33.615 | P | 0.200 | 0.140  |
| R04C | 2006 | 281 | 14 | 2 | 33.786 | P | 0.200 | -0.237 |
| SNB3 | 2006 | 281 | 14 | 2 | 34.887 | P | 0.200 | -0.248 |

|      |      |     |    |   |        |   |       |        |
|------|------|-----|----|---|--------|---|-------|--------|
| JCC  | 2006 | 281 | 14 | 2 | 34.119 | P | 0.200 | 0.394  |
| SUTB | 2006 | 281 | 14 | 2 | 34.304 | P | 0.200 | -0.621 |
| GASB | 2006 | 281 | 14 | 2 | 34.360 | P | 0.200 | 0.814  |
| Q04C | 2006 | 281 | 14 | 2 | 34.497 | P | 0.200 | -0.126 |
| SNA3 | 2006 | 281 | 14 | 2 | 35.503 | P | 0.200 | 0.230  |
| BBR  | 2006 | 281 | 14 | 2 | 34.538 | P | 0.200 | 0.003  |
| HELL | 2006 | 281 | 14 | 2 | 34.671 | P | 0.200 | -0.489 |
| SN93 | 2006 | 281 | 14 | 2 | 34.932 | P | 0.200 | 0.190  |
| CMB  | 2006 | 281 | 14 | 2 | 35.021 | P | 0.200 | -0.124 |
| SNC4 | 2006 | 281 | 14 | 2 | 36.026 | P | 0.200 | -0.075 |
| SNE4 | 2006 | 281 | 14 | 2 | 36.100 | P | 0.200 | -0.110 |
| SN43 | 2006 | 281 | 14 | 2 | 36.152 | P | 0.200 | -0.075 |
| SNA4 | 2006 | 281 | 14 | 2 | 36.377 | P | 0.200 | 0.062  |
| RRX  | 2006 | 281 | 14 | 2 | 35.539 | P | 0.200 | -0.435 |
| LRL  | 2006 | 281 | 14 | 2 | 35.716 | P | 0.200 | 0.099  |
| O02C | 2006 | 281 | 14 | 2 | 35.837 | P | 0.200 | 0.552  |
| SND4 | 2006 | 281 | 14 | 2 | 36.000 | P | 0.200 | -0.199 |
| SND5 | 2006 | 281 | 14 | 2 | 37.100 | P | 0.200 | -0.274 |
| SNC5 | 2006 | 281 | 14 | 2 | 37.175 | P | 0.200 | -0.291 |
| SNE5 | 2006 | 281 | 14 | 2 | 37.195 | P | 0.200 | -0.324 |
| N02C | 2006 | 281 | 14 | 2 | 36.235 | P | 0.200 | 0.288  |
| SNG5 | 2006 | 281 | 14 | 2 | 37.251 | P | 0.200 | -0.142 |
| S06C | 2006 | 281 | 14 | 2 | 36.279 | P | 0.200 | -0.347 |
| LAVA | 2006 | 281 | 14 | 2 | 36.415 | P | 0.200 | -0.069 |
| ORV  | 2006 | 281 | 14 | 2 | 36.750 | P | 0.200 | -0.154 |
| WDC  | 2006 | 281 | 14 | 2 | 37.342 | P | 0.200 | 0.005  |
| SN55 | 2006 | 281 | 14 | 2 | 38.345 | P | 0.200 | -0.116 |
| SNC6 | 2006 | 281 | 14 | 2 | 38.592 | P | 0.200 | -0.122 |
| SNE6 | 2006 | 281 | 14 | 2 | 38.661 | P | 0.200 | -0.267 |
| M01C | 2006 | 281 | 14 | 2 | 37.712 | P | 0.200 | 0.565  |
| SNF6 | 2006 | 281 | 14 | 2 | 38.714 | P | 0.200 | -0.117 |
| CWC  | 2006 | 281 | 14 | 2 | 37.718 | P | 0.200 | 0.018  |
| HEC  | 2006 | 281 | 14 | 2 | 37.946 | P | 0.200 | -0.191 |
| SN96 | 2006 | 281 | 14 | 2 | 37.956 | P | 0.200 | -0.163 |
| GSC  | 2006 | 281 | 14 | 2 | 38.049 | P | 0.200 | -0.028 |
| SLA  | 2006 | 281 | 14 | 2 | 38.293 | P | 0.200 | -0.207 |
| MPM  | 2006 | 281 | 14 | 2 | 38.394 | P | 0.200 | 0.107  |
| R05C | 2006 | 281 | 14 | 2 | 38.637 | P | 0.200 | -0.107 |
| SNC7 | 2006 | 281 | 14 | 2 | 39.819 | P | 0.200 | 0.056  |
| SN97 | 2006 | 281 | 14 | 2 | 39.907 | P | 0.200 | -0.034 |
| TIN  | 2006 | 281 | 14 | 2 | 39.221 | P | 0.200 | 0.135  |
| SND7 | 2006 | 281 | 14 | 2 | 40.309 | P | 0.200 | 0.188  |
| MLAC | 2006 | 281 | 14 | 2 | 39.414 | P | 0.200 | 0.362  |
| SNE7 | 2006 | 281 | 14 | 2 | 40.457 | P | 0.200 | 0.048  |
| SNA7 | 2006 | 281 | 14 | 2 | 40.508 | P | 0.200 | 0.128  |
| M02C | 2006 | 281 | 14 | 2 | 39.840 | P | 0.200 | 0.486  |
| R07C | 2006 | 281 | 14 | 2 | 39.931 | P | 0.200 | -0.027 |
| R06C | 2006 | 281 | 14 | 2 | 40.056 | P | 0.200 | 0.066  |
| K01A | 2006 | 281 | 14 | 2 | 40.126 | P | 0.200 | 0.486  |
| O05C | 2006 | 281 | 14 | 2 | 40.279 | P | 0.200 | 0.186  |
| SND8 | 2006 | 281 | 14 | 2 | 41.385 | P | 0.200 | 0.079  |
| SNA8 | 2006 | 281 | 14 | 2 | 41.482 | P | 0.200 | 0.012  |
| L02A | 2006 | 281 | 14 | 2 | 40.540 | P | 0.200 | 0.584  |
| O04C | 2006 | 281 | 14 | 2 | 40.815 | P | 0.200 | -0.104 |
| M03C | 2006 | 281 | 14 | 2 | 40.973 | P | 0.200 | -0.294 |
| S08C | 2006 | 281 | 14 | 2 | 41.250 | P | 0.200 | 0.349  |
| HATC | 2006 | 281 | 14 | 2 | 41.371 | P | 0.200 | -0.261 |
| YBH  | 2006 | 281 | 14 | 2 | 41.531 | P | 0.200 | 0.530  |
| FUR  | 2006 | 281 | 14 | 2 | 41.546 | P | 0.200 | 0.125  |
| BEK  | 2006 | 281 | 14 | 2 | 41.567 | P | 0.200 | -0.214 |
| SHO  | 2006 | 281 | 14 | 2 | 41.602 | P | 0.200 | -0.235 |
| TUQ  | 2006 | 281 | 14 | 2 | 41.620 | P | 0.200 | -0.045 |
| GRA  | 2006 | 281 | 14 | 2 | 41.793 | P | 0.200 | 0.116  |

|      |      |     |    |   |        |   |       |        |
|------|------|-----|----|---|--------|---|-------|--------|
| WCN  | 2006 | 281 | 14 | 2 | 41.798 | P | 0.200 | 0.152  |
| P06A | 2006 | 281 | 14 | 2 | 42.443 | P | 0.200 | -0.055 |
| K02A | 2006 | 281 | 14 | 2 | 42.525 | P | 0.200 | 0.150  |
| ELFS | 2006 | 281 | 14 | 2 | 43.036 | P | 0.200 | -0.066 |
| Q07A | 2006 | 281 | 14 | 2 | 43.253 | P | 0.200 | -0.074 |
| U10A | 2006 | 281 | 14 | 2 | 43.486 | P | 0.200 | 0.167  |
| R08A | 2006 | 281 | 14 | 2 | 43.527 | P | 0.200 | -0.221 |
| M04C | 2006 | 281 | 14 | 2 | 43.798 | P | 0.200 | 0.044  |
| O06A | 2006 | 281 | 14 | 2 | 44.118 | P | 0.200 | -0.219 |
| M05C | 2006 | 281 | 14 | 2 | 44.255 | P | 0.200 | -0.180 |
| J02A | 2006 | 281 | 14 | 2 | 44.300 | P | 0.200 | 0.023  |
| DBO  | 2006 | 281 | 14 | 2 | 44.434 | P | 0.200 | -0.009 |
| S09A | 2006 | 281 | 14 | 2 | 44.484 | P | 0.200 | -0.115 |
| L04A | 2006 | 281 | 14 | 2 | 44.726 | P | 0.200 | -0.295 |
| V11A | 2006 | 281 | 14 | 2 | 44.735 | P | 0.200 | 0.166  |
| P07A | 2006 | 281 | 14 | 2 | 45.058 | P | 0.200 | -0.142 |
| Q08A | 2006 | 281 | 14 | 2 | 45.769 | P | 0.200 | -0.251 |
| M06C | 2006 | 281 | 14 | 2 | 45.804 | P | 0.200 | -0.069 |
| N06A | 2006 | 281 | 14 | 2 | 46.024 | P | 0.200 | -0.253 |
| J03A | 2006 | 281 | 14 | 2 | 46.365 | P | 0.200 | 0.460  |
| R09A | 2006 | 281 | 14 | 2 | 46.748 | P | 0.200 | -0.110 |
| U11A | 2006 | 281 | 14 | 2 | 46.779 | P | 0.200 | 0.193  |
| K04A | 2006 | 281 | 14 | 2 | 46.868 | P | 0.200 | -0.177 |
| O07A | 2006 | 281 | 14 | 2 | 46.965 | P | 0.200 | -0.356 |
| I03A | 2006 | 281 | 14 | 2 | 47.343 | P | 0.200 | -0.004 |
| L05A | 2006 | 281 | 14 | 2 | 47.693 | P | 0.200 | -0.182 |
| P08A | 2006 | 281 | 14 | 2 | 48.035 | P | 0.200 | -0.267 |
| Q09A | 2006 | 281 | 14 | 2 | 48.062 | P | 0.200 | -0.175 |
| N07B | 2006 | 281 | 14 | 2 | 48.732 | P | 0.200 | -0.194 |
| R10A | 2006 | 281 | 14 | 2 | 49.481 | P | 0.200 | -0.013 |
| O08A | 2006 | 281 | 14 | 2 | 49.901 | P | 0.200 | -0.031 |
| K05A | 2006 | 281 | 14 | 2 | 49.942 | P | 0.200 | 0.012  |
| M07A | 2006 | 281 | 14 | 2 | 50.252 | P | 0.200 | -0.189 |
| P09A | 2006 | 281 | 14 | 2 | 50.349 | P | 0.200 | -0.317 |
| J05A | 2006 | 281 | 14 | 2 | 50.635 | P | 0.200 | -0.161 |
| N08A | 2006 | 281 | 14 | 2 | 51.413 | P | 0.200 | -0.089 |
| L07A | 2006 | 281 | 14 | 2 | 52.044 | P | 0.200 | 0.014  |
| O09A | 2006 | 281 | 14 | 2 | 52.268 | P | 0.200 | -0.172 |
| P10A | 2006 | 281 | 14 | 2 | 52.721 | P | 0.200 | -0.452 |
| Q11A | 2006 | 281 | 14 | 2 | 53.146 | P | 0.200 | -0.143 |

|      |      |     |   |         |           |            |         |        |       |
|------|------|-----|---|---------|-----------|------------|---------|--------|-------|
| 2007 | 199  | 0   | 7 | 35.2046 | -26.29500 | -177.73801 | 10.0000 | 339    | 0.001 |
| SCZ2 | 2007 | 199 | 0 | 19      | 52.533    | P          | 0.200   | 0.096  |       |
| SBC  | 2007 | 199 | 0 | 19      | 53.916    | P          | 0.200   | 0.135  |       |
| V04C | 2007 | 199 | 0 | 19      | 54.231    | P          | 0.200   | 0.250  |       |
| FARB | 2007 | 199 | 0 | 19      | 54.284    | P          | 0.200   | 0.115  |       |
| PHL  | 2007 | 199 | 0 | 19      | 54.404    | P          | 0.200   | 0.144  |       |
| CIA  | 2007 | 199 | 0 | 19      | 54.442    | P          | 0.200   | -0.449 |       |
| V03C | 2007 | 199 | 0 | 19      | 54.476    | P          | 0.200   | 0.520  |       |
| LGU  | 2007 | 199 | 0 | 19      | 54.623    | P          | 0.200   | -0.288 |       |
| HAST | 2007 | 199 | 0 | 19      | 54.635    | P          | 0.200   | 0.369  |       |
| BNLO | 2007 | 199 | 0 | 19      | 55.007    | P          | 0.200   | 0.063  |       |
| MPP  | 2007 | 199 | 0 | 19      | 55.545    | P          | 0.200   | 0.456  |       |
| RPV  | 2007 | 199 | 0 | 19      | 55.748    | P          | 0.200   | -0.250 |       |
| JRSC | 2007 | 199 | 0 | 19      | 55.752    | P          | 0.200   | 0.213  |       |
| FMP  | 2007 | 199 | 0 | 19      | 55.969    | P          | 0.200   | -0.184 |       |
| MCCM | 2007 | 199 | 0 | 19      | 56.128    | P          | 0.200   | 0.028  |       |
| PKD  | 2007 | 199 | 0 | 19      | 56.194    | P          | 0.200   | 0.197  |       |
| SAO  | 2007 | 199 | 0 | 19      | 56.209    | P          | 0.200   | 0.175  |       |
| SMM  | 2007 | 199 | 0 | 19      | 56.230    | P          | 0.200   | 0.366  |       |
| DJJ  | 2007 | 199 | 0 | 19      | 56.666    | P          | 0.200   | -0.170 |       |
| BRK  | 2007 | 199 | 0 | 19      | 57.268    | P          | 0.200   | 0.137  |       |
| U04C | 2007 | 199 | 0 | 19      | 57.390    | P          | 0.200   | 0.705  |       |

|      |      |     |   |    |        |   |       |        |
|------|------|-----|---|----|--------|---|-------|--------|
| DEC  | 2007 | 199 | 0 | 19 | 57.454 | P | 0.200 | -0.282 |
| BKS  | 2007 | 199 | 0 | 19 | 57.505 | P | 0.200 | 0.200  |
| MHC  | 2007 | 199 | 0 | 19 | 57.735 | P | 0.200 | 0.174  |
| PACP | 2007 | 199 | 0 | 19 | 57.749 | P | 0.200 | 0.353  |
| PASC | 2007 | 199 | 0 | 19 | 57.783 | P | 0.200 | -0.309 |
| OSI  | 2007 | 199 | 0 | 19 | 57.788 | P | 0.200 | -0.045 |
| CVS  | 2007 | 199 | 0 | 19 | 58.056 | P | 0.200 | -0.280 |
| BRIB | 2007 | 199 | 0 | 19 | 58.059 | P | 0.200 | 0.465  |
| WENL | 2007 | 199 | 0 | 19 | 58.296 | P | 0.200 | 0.505  |
| V05C | 2007 | 199 | 0 | 19 | 58.535 | P | 0.200 | 0.682  |
| MWC  | 2007 | 199 | 0 | 19 | 58.578 | P | 0.200 | -0.288 |
| CHF  | 2007 | 199 | 0 | 19 | 58.942 | P | 0.200 | -0.230 |
| ARV  | 2007 | 199 | 0 | 19 | 58.970 | P | 0.200 | 0.133  |
| BDM  | 2007 | 199 | 0 | 19 | 59.155 | P | 0.200 | 0.572  |
| S04C | 2007 | 199 | 0 | 19 | 59.170 | P | 0.200 | 0.294  |
| VCS  | 2007 | 199 | 0 | 19 | 59.173 | P | 0.200 | -0.083 |
| U05C | 2007 | 199 | 0 | 19 | 59.257 | P | 0.200 | 0.614  |
| T05C | 2007 | 199 | 0 | 19 | 59.590 | P | 0.200 | 0.676  |
| P01C | 2007 | 199 | 0 | 19 | 59.812 | P | 0.200 | 0.316  |
| BFS  | 2007 | 199 | 0 | 19 | 59.913 | P | 0.200 | -0.155 |
| VES  | 2007 | 199 | 0 | 20 | 0.086  | P | 0.200 | -0.217 |
| MNRC | 2007 | 199 | 0 | 20 | 0.701  | P | 0.200 | 0.533  |
| O01C | 2007 | 199 | 0 | 20 | 0.822  | P | 0.200 | 0.433  |
| RCT  | 2007 | 199 | 0 | 20 | 0.850  | P | 0.200 | -0.571 |
| EDW2 | 2007 | 199 | 0 | 20 | 1.018  | P | 0.200 | 0.099  |
| S05C | 2007 | 199 | 0 | 20 | 1.178  | P | 0.200 | -0.284 |
| Q03C | 2007 | 199 | 0 | 20 | 1.387  | P | 0.200 | 0.970  |
| SVD  | 2007 | 199 | 0 | 20 | 1.715  | P | 0.200 | 0.110  |
| ADO  | 2007 | 199 | 0 | 20 | 1.909  | P | 0.200 | -0.032 |
| VTV  | 2007 | 199 | 0 | 20 | 2.037  | P | 0.200 | -0.084 |
| ISA  | 2007 | 199 | 0 | 20 | 2.127  | P | 0.200 | 0.248  |
| T06C | 2007 | 199 | 0 | 20 | 2.140  | P | 0.200 | -0.198 |
| R04C | 2007 | 199 | 0 | 20 | 2.266  | P | 0.200 | -0.182 |
| JCC  | 2007 | 199 | 0 | 20 | 2.510  | P | 0.200 | 0.338  |
| SUTB | 2007 | 199 | 0 | 20 | 2.752  | P | 0.200 | -0.583 |
| Q04C | 2007 | 199 | 0 | 20 | 2.948  | P | 0.200 | -0.075 |
| BBR  | 2007 | 199 | 0 | 20 | 2.951  | P | 0.200 | 0.099  |
| GASB | 2007 | 199 | 0 | 20 | 2.976  | P | 0.200 | 0.962  |
| HELL | 2007 | 199 | 0 | 20 | 3.077  | P | 0.200 | -0.443 |
| SNC3 | 2007 | 199 | 0 | 20 | 3.230  | P | 0.200 | 0.052  |
| SNB3 | 2007 | 199 | 0 | 20 | 3.273  | P | 0.200 | -0.259 |
| CMB  | 2007 | 199 | 0 | 20 | 3.346  | P | 0.200 | -0.176 |
| SN93 | 2007 | 199 | 0 | 20 | 3.474  | P | 0.200 | 0.344  |
| SNA3 | 2007 | 199 | 0 | 20 | 3.874  | P | 0.200 | 0.228  |
| RRX  | 2007 | 199 | 0 | 20 | 4.132  | P | 0.200 | -0.091 |
| LRL  | 2007 | 199 | 0 | 20 | 4.155  | P | 0.200 | 0.246  |
| O02C | 2007 | 199 | 0 | 20 | 4.217  | P | 0.200 | 0.539  |
| SN63 | 2007 | 199 | 0 | 20 | 4.293  | P | 0.200 | -0.243 |
| SNC4 | 2007 | 199 | 0 | 20 | 4.355  | P | 0.200 | -0.081 |
| SND4 | 2007 | 199 | 0 | 20 | 4.432  | P | 0.200 | -0.119 |
| YO01 | 2007 | 199 | 0 | 20 | 4.459  | P | 0.200 | -0.171 |
| SNE4 | 2007 | 199 | 0 | 20 | 4.475  | P | 0.200 | -0.075 |
| S06C | 2007 | 199 | 0 | 20 | 4.537  | P | 0.200 | -0.420 |
| N02C | 2007 | 199 | 0 | 20 | 4.569  | P | 0.200 | 0.278  |
| SNA4 | 2007 | 199 | 0 | 20 | 4.598  | P | 0.200 | -0.046 |
| YO02 | 2007 | 199 | 0 | 20 | 4.609  | P | 0.200 | -0.302 |
| LAVA | 2007 | 199 | 0 | 20 | 4.675  | P | 0.200 | -0.129 |
| YO03 | 2007 | 199 | 0 | 20 | 4.740  | P | 0.200 | -0.258 |
| O03C | 2007 | 199 | 0 | 20 | 4.838  | P | 0.200 | -0.142 |
| YO04 | 2007 | 199 | 0 | 20 | 4.909  | P | 0.200 | -0.346 |
| ORV  | 2007 | 199 | 0 | 20 | 4.993  | P | 0.200 | -0.223 |
| YO05 | 2007 | 199 | 0 | 20 | 5.135  | P | 0.200 | -0.277 |
| SNC5 | 2007 | 199 | 0 | 20 | 5.290  | P | 0.200 | -0.457 |

|      |      |     |   |    |        |   |       |        |
|------|------|-----|---|----|--------|---|-------|--------|
| SND5 | 2007 | 199 | 0 | 20 | 5.315  | P | 0.200 | -0.334 |
| SN64 | 2007 | 199 | 0 | 20 | 5.402  | P | 0.200 | -0.147 |
| SNG5 | 2007 | 199 | 0 | 20 | 5.418  | P | 0.200 | -0.260 |
| YO07 | 2007 | 199 | 0 | 20 | 5.440  | P | 0.200 | -0.150 |
| SNB5 | 2007 | 199 | 0 | 20 | 5.469  | P | 0.200 | -0.300 |
| YO06 | 2007 | 199 | 0 | 20 | 5.504  | P | 0.200 | -0.088 |
| SNE5 | 2007 | 199 | 0 | 20 | 5.564  | P | 0.200 | -0.247 |
| YO08 | 2007 | 199 | 0 | 20 | 5.574  | P | 0.200 | -0.222 |
| SNA5 | 2007 | 199 | 0 | 20 | 5.643  | P | 0.200 | -0.303 |
| WDC  | 2007 | 199 | 0 | 20 | 5.707  | P | 0.200 | 0.086  |
| YO09 | 2007 | 199 | 0 | 20 | 5.788  | P | 0.200 | -0.160 |
| CWC  | 2007 | 199 | 0 | 20 | 5.888  | P | 0.200 | -0.051 |
| YO10 | 2007 | 199 | 0 | 20 | 6.052  | P | 0.200 | -0.090 |
| M01C | 2007 | 199 | 0 | 20 | 6.062  | P | 0.200 | 0.651  |
| SN96 | 2007 | 199 | 0 | 20 | 6.147  | P | 0.200 | -0.236 |
| YO11 | 2007 | 199 | 0 | 20 | 6.300  | P | 0.200 | -0.123 |
| HEC  | 2007 | 199 | 0 | 20 | 6.316  | P | 0.200 | 0.051  |
| GSC  | 2007 | 199 | 0 | 20 | 6.345  | P | 0.200 | 0.103  |
| SN55 | 2007 | 199 | 0 | 20 | 6.513  | P | 0.200 | -0.194 |
| SLA  | 2007 | 199 | 0 | 20 | 6.596  | P | 0.200 | -0.078 |
| MPM  | 2007 | 199 | 0 | 20 | 6.612  | P | 0.200 | 0.144  |
| SNB6 | 2007 | 199 | 0 | 20 | 6.720  | P | 0.200 | -0.176 |
| SNC6 | 2007 | 199 | 0 | 20 | 6.748  | P | 0.200 | -0.186 |
| R05C | 2007 | 199 | 0 | 20 | 6.794  | P | 0.200 | -0.171 |
| SNF6 | 2007 | 199 | 0 | 20 | 6.868  | P | 0.200 | -0.186 |
| SNE6 | 2007 | 199 | 0 | 20 | 6.911  | P | 0.200 | -0.244 |
| SN86 | 2007 | 199 | 0 | 20 | 7.066  | P | 0.200 | -0.115 |
| P05C | 2007 | 199 | 0 | 20 | 7.183  | P | 0.200 | 0.059  |
| TIN  | 2007 | 199 | 0 | 20 | 7.274  | P | 0.200 | 0.012  |
| MLAC | 2007 | 199 | 0 | 20 | 7.484  | P | 0.200 | 0.249  |
| SNB7 | 2007 | 199 | 0 | 20 | 7.700  | P | 0.200 | -0.178 |
| SNC7 | 2007 | 199 | 0 | 20 | 7.922  | P | 0.200 | -0.007 |
| SNG7 | 2007 | 199 | 0 | 20 | 8.004  | P | 0.200 | -0.219 |
| R07C | 2007 | 199 | 0 | 20 | 8.064  | P | 0.200 | -0.049 |
| SN97 | 2007 | 199 | 0 | 20 | 8.100  | P | 0.200 | 0.007  |
| M02C | 2007 | 199 | 0 | 20 | 8.196  | P | 0.200 | 0.675  |
| R06C | 2007 | 199 | 0 | 20 | 8.238  | P | 0.200 | 0.107  |
| O05C | 2007 | 199 | 0 | 20 | 8.254  | P | 0.200 | 0.029  |
| SND7 | 2007 | 199 | 0 | 20 | 8.388  | P | 0.200 | 0.131  |
| K01A | 2007 | 199 | 0 | 20 | 8.427  | P | 0.200 | 0.672  |
| SN87 | 2007 | 199 | 0 | 20 | 8.470  | P | 0.200 | 0.063  |
| SNE7 | 2007 | 199 | 0 | 20 | 8.477  | P | 0.200 | -0.066 |
| SNA7 | 2007 | 199 | 0 | 20 | 8.533  | P | 0.200 | 0.011  |
| L02A | 2007 | 199 | 0 | 20 | 8.603  | P | 0.200 | 0.510  |
| O04C | 2007 | 199 | 0 | 20 | 8.901  | P | 0.200 | -0.107 |
| M03C | 2007 | 199 | 0 | 20 | 8.991  | P | 0.200 | -0.363 |
| S08C | 2007 | 199 | 0 | 20 | 9.272  | P | 0.200 | 0.292  |
| SNF8 | 2007 | 199 | 0 | 20 | 9.319  | P | 0.200 | -0.270 |
| SND8 | 2007 | 199 | 0 | 20 | 9.402  | P | 0.200 | 0.021  |
| HATC | 2007 | 199 | 0 | 20 | 9.474  | P | 0.200 | -0.231 |
| YBH  | 2007 | 199 | 0 | 20 | 9.499  | P | 0.200 | 0.424  |
| BEK  | 2007 | 199 | 0 | 20 | 9.617  | P | 0.200 | -0.226 |
| FUR  | 2007 | 199 | 0 | 20 | 9.634  | P | 0.200 | 0.223  |
| SHO  | 2007 | 199 | 0 | 20 | 9.659  | P | 0.200 | -0.145 |
| WCN  | 2007 | 199 | 0 | 20 | 9.748  | P | 0.200 | 0.047  |
| TUQ  | 2007 | 199 | 0 | 20 | 9.774  | P | 0.200 | 0.152  |
| GRA  | 2007 | 199 | 0 | 20 | 9.795  | P | 0.200 | 0.116  |
| SNF9 | 2007 | 199 | 0 | 20 | 10.280 | P | 0.200 | -0.300 |
| SNB9 | 2007 | 199 | 0 | 20 | 10.423 | P | 0.200 | -0.056 |
| P06A | 2007 | 199 | 0 | 20 | 10.500 | P | 0.200 | -0.018 |
| SNE9 | 2007 | 199 | 0 | 20 | 10.631 | P | 0.200 | -0.326 |
| K02A | 2007 | 199 | 0 | 20 | 10.699 | P | 0.200 | 0.344  |
| SND9 | 2007 | 199 | 0 | 20 | 10.803 | P | 0.200 | 0.021  |

|      |      |     |   |    |        |   |       |        |
|------|------|-----|---|----|--------|---|-------|--------|
| ELFS | 2007 | 199 | 0 | 20 | 11.010 | P | 0.200 | -0.067 |
| Q07A | 2007 | 199 | 0 | 20 | 11.303 | P | 0.200 | 0.026  |
| R08A | 2007 | 199 | 0 | 20 | 11.401 | P | 0.200 | -0.273 |
| U10A | 2007 | 199 | 0 | 20 | 11.579 | P | 0.200 | 0.363  |
| M04C | 2007 | 199 | 0 | 20 | 11.776 | P | 0.200 | 0.093  |
| HUMO | 2007 | 199 | 0 | 20 | 11.789 | P | 0.200 | 0.403  |
| O06A | 2007 | 199 | 0 | 20 | 11.978 | P | 0.200 | -0.271 |
| M05C | 2007 | 199 | 0 | 20 | 12.108 | P | 0.200 | -0.241 |
| S09A | 2007 | 199 | 0 | 20 | 12.348 | P | 0.200 | -0.115 |
| J02A | 2007 | 199 | 0 | 20 | 12.414 | P | 0.200 | 0.267  |
| TAKO | 2007 | 199 | 0 | 20 | 12.425 | P | 0.200 | 0.260  |
| DBO  | 2007 | 199 | 0 | 20 | 12.502 | P | 0.200 | 0.180  |
| V11A | 2007 | 199 | 0 | 20 | 12.686 | P | 0.200 | 0.318  |
| L04A | 2007 | 199 | 0 | 20 | 12.737 | P | 0.200 | -0.148 |
| P07A | 2007 | 199 | 0 | 20 | 12.871 | P | 0.200 | -0.201 |
| TPH  | 2007 | 199 | 0 | 20 | 13.338 | P | 0.200 | -0.237 |
| TPNV | 2007 | 199 | 0 | 20 | 13.348 | P | 0.200 | 0.206  |
| Q08A | 2007 | 199 | 0 | 20 | 13.480 | P | 0.200 | -0.358 |
| M06C | 2007 | 199 | 0 | 20 | 13.582 | P | 0.200 | -0.120 |
| N06A | 2007 | 199 | 0 | 20 | 13.833 | P | 0.200 | -0.258 |
| J03A | 2007 | 199 | 0 | 20 | 14.194 | P | 0.200 | 0.506  |
| R09A | 2007 | 199 | 0 | 20 | 14.405 | P | 0.200 | -0.217 |
| U11A | 2007 | 199 | 0 | 20 | 14.540 | P | 0.200 | 0.239  |
| O07A | 2007 | 199 | 0 | 20 | 14.621 | P | 0.200 | -0.464 |
| K04A | 2007 | 199 | 0 | 20 | 14.621 | P | 0.200 | -0.184 |
| S10A | 2007 | 199 | 0 | 20 | 14.943 | P | 0.200 | -0.167 |
| I03A | 2007 | 199 | 0 | 20 | 15.044 | P | 0.200 | -0.017 |
| L05A | 2007 | 199 | 0 | 20 | 15.471 | P | 0.200 | -0.148 |
| Q09A | 2007 | 199 | 0 | 20 | 15.697 | P | 0.200 | -0.224 |
| J04A | 2007 | 199 | 0 | 20 | 15.774 | P | 0.200 | -0.147 |
| P08A | 2007 | 199 | 0 | 20 | 15.837 | P | 0.200 | -0.173 |
| I04A | 2007 | 199 | 0 | 20 | 16.306 | P | 0.200 | -0.357 |
| N07B | 2007 | 199 | 0 | 20 | 16.398 | P | 0.200 | -0.195 |
| S11A | 2007 | 199 | 0 | 20 | 16.708 | P | 0.200 | -0.059 |
| R10A | 2007 | 199 | 0 | 20 | 16.994 | P | 0.200 | -0.116 |
| O08A | 2007 | 199 | 0 | 20 | 17.367 | P | 0.200 | -0.187 |
| K05A | 2007 | 199 | 0 | 20 | 17.504 | P | 0.200 | -0.047 |
| T11A | 2007 | 199 | 0 | 20 | 17.589 | P | 0.200 | 0.356  |
| M07A | 2007 | 199 | 0 | 20 | 17.844 | P | 0.200 | -0.199 |
| P09A | 2007 | 199 | 0 | 20 | 17.864 | P | 0.200 | -0.374 |
| Q10A | 2007 | 199 | 0 | 20 | 18.314 | P | 0.200 | -0.008 |
| J05A | 2007 | 199 | 0 | 20 | 18.440 | P | 0.200 | 0.070  |
| N08A | 2007 | 199 | 0 | 20 | 18.944 | P | 0.200 | -0.097 |
| R11A | 2007 | 199 | 0 | 20 | 19.249 | P | 0.200 | -0.213 |
| L07A | 2007 | 199 | 0 | 20 | 19.601 | P | 0.200 | 0.043  |
| O09A | 2007 | 199 | 0 | 20 | 19.742 | P | 0.200 | -0.181 |
| P10A | 2007 | 199 | 0 | 20 | 20.058 | P | 0.200 | -0.567 |
| Q11A | 2007 | 199 | 0 | 20 | 20.508 | P | 0.200 | -0.212 |

|      |      |     |    |         |           |            |          |        |       |
|------|------|-----|----|---------|-----------|------------|----------|--------|-------|
| 1988 | 260  | 2   | 16 | 21.0670 | -20.46900 | -178.44501 | 570.0000 | 449    | 0.000 |
| arc  | 1988 | 260 | 2  | 27      | 31.780    | P          | 0.200    | 0.169  |       |
| bkr  | 1988 | 260 | 2  | 27      | 30.630    | P          | 0.200    | 0.160  |       |
| bmd  | 1988 | 260 | 2  | 27      | 30.740    | P          | 0.200    | -0.563 |       |
| ccr  | 1988 | 260 | 2  | 27      | 32.010    | P          | 0.200    | 0.195  |       |
| cdg  | 1988 | 260 | 2  | 27      | 32.720    | P          | 0.200    | 0.135  |       |
| jhn  | 1988 | 260 | 2  | 27      | 30.500    | P          | 0.200    | -0.249 |       |
| mnk  | 1988 | 260 | 2  | 27      | 31.960    | P          | 0.200    | -0.017 |       |
| ndl  | 1988 | 260 | 2  | 27      | 31.120    | P          | 0.200    | -0.185 |       |
| WMD  | 1988 | 260 | 2  | 27      | 31.200    | P          | 0.200    | -0.304 |       |
| cou  | 1988 | 260 | 2  | 27      | 33.030    | P          | 0.200    | 0.224  |       |
| jun  | 1988 | 260 | 2  | 27      | 33.570    | P          | 0.200    | 0.434  |       |

|      |     |    |    |        |           |            |         |     |       |
|------|-----|----|----|--------|-----------|------------|---------|-----|-------|
| 1988 | 198 | 16 | 55 | 1.7431 | -27.25600 | -176.82100 | 30.0000 | 411 | 0.005 |
|------|-----|----|----|--------|-----------|------------|---------|-----|-------|



|     |      |     |    |   |        |   |       |        |
|-----|------|-----|----|---|--------|---|-------|--------|
| arc | 1988 | 198 | 17 | 7 | 27.630 | P | 0.200 | -0.073 |
| jhn | 1988 | 198 | 17 | 7 | 26.400 | P | 0.200 | -0.494 |
| mnk | 1988 | 198 | 17 | 7 | 27.970 | P | 0.200 | -0.355 |
| pmt | 1988 | 198 | 17 | 7 | 28.150 | P | 0.200 | -0.011 |
| WMD | 1988 | 198 | 17 | 7 | 27.190 | P | 0.200 | -0.564 |
| twr | 1988 | 198 | 17 | 7 | 28.370 | P | 0.200 | -0.279 |
| BNP | 1988 | 198 | 17 | 7 | 34.250 | P | 0.200 | 0.164  |
| CLC | 1988 | 198 | 17 | 7 | 29.270 | P | 0.200 | -0.017 |
| GSC | 1988 | 198 | 17 | 7 | 30.250 | P | 0.200 | 0.169  |
| LRM | 1988 | 198 | 17 | 7 | 27.820 | P | 0.200 | 0.029  |
| TOW | 1988 | 198 | 17 | 7 | 29.050 | P | 0.200 | 0.351  |
| WAS | 1988 | 198 | 17 | 7 | 26.050 | P | 0.200 | -0.122 |
| WBS | 1988 | 198 | 17 | 7 | 26.470 | P | 0.200 | -0.291 |
| WCS | 1988 | 198 | 17 | 7 | 29.600 | P | 0.200 | 0.128  |
| WCX | 1988 | 198 | 17 | 7 | 28.670 | P | 0.200 | -0.244 |
| WHF | 1988 | 198 | 17 | 7 | 26.600 | P | 0.200 | 0.256  |
| WHS | 1988 | 198 | 17 | 7 | 29.820 | P | 0.200 | -0.030 |
| WHV | 1988 | 198 | 17 | 7 | 25.550 | P | 0.200 | 0.285  |
| WJP | 1988 | 198 | 17 | 7 | 25.340 | P | 0.200 | 0.182  |
| WOF | 1988 | 198 | 17 | 7 | 24.940 | P | 0.200 | 0.001  |
| WOR | 1988 | 198 | 17 | 7 | 26.850 | P | 0.200 | -0.001 |
| WRC | 1988 | 198 | 17 | 7 | 29.800 | P | 0.200 | 0.378  |
| WVP | 1988 | 198 | 17 | 7 | 29.330 | P | 0.200 | 0.364  |
| XMS | 1988 | 198 | 17 | 7 | 29.130 | P | 0.200 | 0.051  |
| BLK | 1988 | 198 | 17 | 7 | 28.200 | P | 0.200 | 0.123  |
| CAL | 1988 | 198 | 17 | 7 | 25.820 | P | 0.200 | 0.091  |
| FLS | 1988 | 198 | 17 | 7 | 28.210 | P | 0.200 | -0.126 |
| HOD | 1988 | 198 | 17 | 7 | 26.840 | P | 0.200 | -0.469 |
| SRT | 1988 | 198 | 17 | 7 | 28.660 | P | 0.200 | 0.271  |
| WBM | 1988 | 198 | 17 | 7 | 27.760 | P | 0.200 | 0.127  |
| WCH | 1988 | 198 | 17 | 7 | 28.410 | P | 0.200 | 0.116  |
| WLH | 1988 | 198 | 17 | 7 | 28.220 | P | 0.200 | -0.009 |

|      |     |    |    |         |           |            |         |     |       |
|------|-----|----|----|---------|-----------|------------|---------|-----|-------|
| 1988 | 240 | 16 | 30 | 21.9310 | -15.87500 | -172.08000 | 55.0000 | 432 | 0.006 |
|------|-----|----|----|---------|-----------|------------|---------|-----|-------|

|     |      |     |    |    |        |   |       |        |
|-----|------|-----|----|----|--------|---|-------|--------|
| arc | 1988 | 240 | 16 | 41 | 42.700 | P | 0.200 | -0.032 |
| bkr | 1988 | 240 | 16 | 41 | 41.450 | P | 0.200 | 0.045  |
| bmd | 1988 | 240 | 16 | 41 | 42.550 | P | 0.200 | 0.203  |
| ccr | 1988 | 240 | 16 | 41 | 43.100 | P | 0.200 | 0.042  |
| ndl | 1988 | 240 | 16 | 41 | 42.050 | P | 0.200 | -0.346 |
| pmt | 1988 | 240 | 16 | 41 | 43.350 | P | 0.200 | 0.046  |
| WMD | 1988 | 240 | 16 | 41 | 42.100 | P | 0.200 | -0.472 |
| cou | 1988 | 240 | 16 | 41 | 44.200 | P | 0.200 | 0.079  |
| jun | 1988 | 240 | 16 | 41 | 44.400 | P | 0.200 | -0.098 |
| BLK | 1988 | 240 | 16 | 41 | 43.940 | P | 0.200 | 0.097  |
| BMT | 1988 | 240 | 16 | 41 | 38.590 | P | 0.200 | 0.135  |
| CAL | 1988 | 240 | 16 | 41 | 40.990 | P | 0.200 | 0.083  |
| DTP | 1988 | 240 | 16 | 41 | 41.980 | P | 0.200 | 0.098  |
| FLS | 1988 | 240 | 16 | 41 | 43.950 | P | 0.200 | -0.277 |
| GSC | 1988 | 240 | 16 | 41 | 46.200 | P | 0.200 | 0.014  |
| HOD | 1988 | 240 | 16 | 41 | 42.570 | P | 0.200 | -0.422 |
| ISA | 1988 | 240 | 16 | 41 | 41.030 | P | 0.200 | 0.304  |
| JFS | 1988 | 240 | 16 | 41 | 43.130 | P | 0.200 | 0.229  |
| WJP | 1988 | 240 | 16 | 41 | 40.240 | P | 0.200 | 0.272  |

|      |     |   |    |         |           |            |          |     |       |
|------|-----|---|----|---------|-----------|------------|----------|-----|-------|
| 1988 | 188 | 1 | 10 | 54.0293 | -17.68300 | -178.87700 | 545.0000 | 407 | 0.003 |
|------|-----|---|----|---------|-----------|------------|----------|-----|-------|

|     |      |     |   |    |        |   |       |        |
|-----|------|-----|---|----|--------|---|-------|--------|
| mnk | 1988 | 188 | 1 | 21 | 58.050 | P | 0.200 | -0.356 |
| ndl | 1988 | 188 | 1 | 21 | 57.300 | P | 0.200 | -0.498 |
| bar | 1988 | 188 | 1 | 21 | 58.700 | P | 0.200 | -0.276 |
| cha | 1988 | 188 | 1 | 21 | 58.830 | P | 0.200 | -0.362 |
| cou | 1988 | 188 | 1 | 21 | 59.200 | P | 0.200 | -0.106 |
| jun | 1988 | 188 | 1 | 21 | 59.300 | P | 0.200 | -0.281 |
| twr | 1988 | 188 | 1 | 21 | 58.520 | P | 0.200 | -0.340 |
| BMT | 1988 | 188 | 1 | 21 | 54.770 | P | 0.200 | 0.292  |

|     |      |     |   |    |        |   |       |        |
|-----|------|-----|---|----|--------|---|-------|--------|
| BNP | 1988 | 188 | 1 | 22 | 3.950  | P | 0.200 | 0.271  |
| CLC | 1988 | 188 | 1 | 22 | 0.200  | P | 0.200 | 0.041  |
| ISA | 1988 | 188 | 1 | 21 | 56.700 | P | 0.200 | 0.308  |
| LRM | 1988 | 188 | 1 | 21 | 58.850 | P | 0.200 | 0.025  |
| WAS | 1988 | 188 | 1 | 21 | 56.430 | P | 0.200 | -0.177 |
| WBS | 1988 | 188 | 1 | 21 | 57.580 | P | 0.200 | 0.074  |
| WCH | 1988 | 188 | 1 | 21 | 58.910 | P | 0.200 | 0.013  |
| WCS | 1988 | 188 | 1 | 22 | 0.440  | P | 0.200 | 0.281  |
| WHF | 1988 | 188 | 1 | 21 | 57.150 | P | 0.200 | 0.212  |
| WHV | 1988 | 188 | 1 | 21 | 56.100 | P | 0.200 | 0.262  |
| WJP | 1988 | 188 | 1 | 21 | 56.000 | P | 0.200 | 0.197  |
| WMF | 1988 | 188 | 1 | 22 | 0.280  | P | 0.200 | 0.216  |
| WOF | 1988 | 188 | 1 | 21 | 55.370 | P | 0.200 | -0.016 |
| WOR | 1988 | 188 | 1 | 21 | 57.450 | P | 0.200 | -0.006 |
| WRC | 1988 | 188 | 1 | 22 | 0.610  | P | 0.200 | 0.387  |
| WSH | 1988 | 188 | 1 | 21 | 59.810 | P | 0.200 | -0.217 |
| WVP | 1988 | 188 | 1 | 22 | 0.030  | P | 0.200 | 0.347  |
| XMS | 1988 | 188 | 1 | 22 | 0.360  | P | 0.200 | 0.119  |
| ARV | 1988 | 188 | 1 | 21 | 53.400 | P | 0.200 | -0.020 |
| BLK | 1988 | 188 | 1 | 21 | 59.750 | P | 0.200 | 0.225  |
| CAL | 1988 | 188 | 1 | 21 | 56.870 | P | 0.200 | 0.090  |
| DTP | 1988 | 188 | 1 | 21 | 57.540 | P | 0.200 | -0.094 |
| FLS | 1988 | 188 | 1 | 21 | 59.750 | P | 0.200 | -0.179 |
| GSC | 1988 | 188 | 1 | 22 | 1.670  | P | 0.200 | 0.039  |
| HOD | 1988 | 188 | 1 | 21 | 58.470 | P | 0.200 | -0.379 |
| SBK | 1988 | 188 | 1 | 21 | 58.210 | P | 0.200 | -0.077 |
| SRT | 1988 | 188 | 1 | 21 | 59.390 | P | 0.200 | 0.138  |
| TJR | 1988 | 188 | 1 | 21 | 53.300 | P | 0.200 | -0.288 |
| TOW | 1988 | 188 | 1 | 21 | 59.900 | P | 0.200 | 0.412  |
| WHS | 1988 | 188 | 1 | 22 | 0.570  | P | 0.200 | 0.064  |
| WLH | 1988 | 188 | 1 | 21 | 58.450 | P | 0.200 | -0.171 |
| WSC | 1988 | 188 | 1 | 21 | 58.580 | P | 0.200 | -0.170 |

|      |      |     |    |         |           |            |        |        |       |
|------|------|-----|----|---------|-----------|------------|--------|--------|-------|
| 2005 | 287  | 18  | 58 | 10.2381 | -18.31200 | -172.43401 | 0.9000 | 27     | 0.003 |
| CIA  | 2005 | 287 | 19 | 9       | 40.362    | P          | 0.200  | -0.404 |       |
| LGU  | 2005 | 287 | 19 | 9       | 40.402    | P          | 0.200  | -0.194 |       |
| SCZ  | 2005 | 287 | 19 | 9       | 41.090    | P          | 0.200  | 0.530  |       |
| SAO  | 2005 | 287 | 19 | 9       | 41.266    | P          | 0.200  | 0.022  |       |
| PKD  | 2005 | 287 | 19 | 9       | 41.545    | P          | 0.200  | 0.121  |       |
| TOV  | 2005 | 287 | 19 | 9       | 41.633    | P          | 0.200  | 0.023  |       |
| SMM  | 2005 | 287 | 19 | 9       | 41.682    | P          | 0.200  | 0.299  |       |
| RPV  | 2005 | 287 | 19 | 9       | 42.006    | P          | 0.200  | 0.041  |       |
| BRK  | 2005 | 287 | 19 | 9       | 42.490    | P          | 0.200  | 0.164  |       |
| DJJ  | 2005 | 287 | 19 | 9       | 42.836    | P          | 0.200  | -0.047 |       |
| U04C | 2005 | 287 | 19 | 9       | 42.846    | P          | 0.200  | 0.722  |       |
| BRIB | 2005 | 287 | 19 | 9       | 43.101    | P          | 0.200  | 0.248  |       |
| MHC  | 2005 | 287 | 19 | 9       | 43.126    | P          | 0.200  | 0.274  |       |
| PACP | 2005 | 287 | 19 | 9       | 43.207    | P          | 0.200  | 0.435  |       |
| CVS  | 2005 | 287 | 19 | 9       | 43.354    | P          | 0.200  | -0.225 |       |
| WENL | 2005 | 287 | 19 | 9       | 43.578    | P          | 0.200  | 0.430  |       |
| OSI  | 2005 | 287 | 19 | 9       | 43.790    | P          | 0.200  | -0.039 |       |
| PAS  | 2005 | 287 | 19 | 9       | 43.995    | P          | 0.200  | -0.150 |       |
| V05C | 2005 | 287 | 19 | 9       | 44.400    | P          | 0.200  | 0.816  |       |
| S04C | 2005 | 287 | 19 | 9       | 44.574    | P          | 0.200  | 0.192  |       |
| ARV  | 2005 | 287 | 19 | 9       | 44.800    | P          | 0.200  | -0.160 |       |
| MWC  | 2005 | 287 | 19 | 9       | 44.900    | P          | 0.200  | -0.268 |       |
| CHF  | 2005 | 287 | 19 | 9       | 45.210    | P          | 0.200  | -0.326 |       |
| VCS  | 2005 | 287 | 19 | 9       | 45.327    | P          | 0.200  | -0.259 |       |
| BFS  | 2005 | 287 | 19 | 9       | 46.114    | P          | 0.200  | -0.487 |       |
| VES  | 2005 | 287 | 19 | 9       | 46.230    | P          | 0.200  | -0.243 |       |
| RCT  | 2005 | 287 | 19 | 9       | 47.095    | P          | 0.200  | -0.542 |       |
| S05C | 2005 | 287 | 19 | 9       | 47.134    | P          | 0.200  | -0.304 |       |
| SN71 | 2005 | 287 | 19 | 9       | 47.752    | P          | 0.200  | -0.319 |       |

|      |      |     |    |   |        |   |       |        |
|------|------|-----|----|---|--------|---|-------|--------|
| R04C | 2005 | 287 | 19 | 9 | 48.025 | P | 0.200 | -0.422 |
| SN51 | 2005 | 287 | 19 | 9 | 48.227 | P | 0.200 | 0.242  |
| T06C | 2005 | 287 | 19 | 9 | 48.256 | P | 0.200 | -0.257 |
| SN11 | 2005 | 287 | 19 | 9 | 48.354 | P | 0.200 | -0.326 |
| ISA  | 2005 | 287 | 19 | 9 | 48.500 | P | 0.200 | 0.159  |
| SVD  | 2005 | 287 | 19 | 9 | 48.502 | P | 0.200 | 0.084  |
| SUTB | 2005 | 287 | 19 | 9 | 48.649 | P | 0.200 | -0.589 |
| GASB | 2005 | 287 | 19 | 9 | 48.749 | P | 0.200 | 1.089  |
| VTV  | 2005 | 287 | 19 | 9 | 48.803 | P | 0.200 | -0.124 |
| Q04C | 2005 | 287 | 19 | 9 | 48.848 | P | 0.200 | -0.154 |
| SN52 | 2005 | 287 | 19 | 9 | 48.935 | P | 0.200 | -0.407 |
| SN62 | 2005 | 287 | 19 | 9 | 49.241 | P | 0.200 | -0.346 |
| HELL | 2005 | 287 | 19 | 9 | 49.452 | P | 0.200 | -0.524 |
| SN22 | 2005 | 287 | 19 | 9 | 49.693 | P | 0.200 | -0.257 |
| CMB  | 2005 | 287 | 19 | 9 | 49.702 | P | 0.200 | -0.003 |
| SN73 | 2005 | 287 | 19 | 9 | 49.962 | P | 0.200 | -0.048 |
| N02C | 2005 | 287 | 19 | 9 | 50.294 | P | 0.200 | 0.167  |
| SN84 | 2005 | 287 | 19 | 9 | 50.549 | P | 0.200 | -0.689 |
| LRL  | 2005 | 287 | 19 | 9 | 50.661 | P | 0.200 | -0.086 |
| SN23 | 2005 | 287 | 19 | 9 | 50.930 | P | 0.200 | -0.107 |
| SN43 | 2005 | 287 | 19 | 9 | 50.934 | P | 0.200 | -0.058 |
| SN74 | 2005 | 287 | 19 | 9 | 50.993 | P | 0.200 | -0.270 |
| LAVA | 2005 | 287 | 19 | 9 | 51.006 | P | 0.200 | -0.046 |
| O03C | 2005 | 287 | 19 | 9 | 51.012 | P | 0.200 | -0.061 |
| S06C | 2005 | 287 | 19 | 9 | 51.014 | P | 0.200 | -0.314 |
| SN95 | 2005 | 287 | 19 | 9 | 51.018 | P | 0.200 | -0.474 |
| ORV  | 2005 | 287 | 19 | 9 | 51.148 | P | 0.200 | -0.213 |
| WDC  | 2005 | 287 | 19 | 9 | 51.777 | P | 0.200 | 0.084  |
| SN54 | 2005 | 287 | 19 | 9 | 51.893 | P | 0.200 | -0.134 |
| SN64 | 2005 | 287 | 19 | 9 | 51.926 | P | 0.200 | -0.110 |
| SN44 | 2005 | 287 | 19 | 9 | 52.040 | P | 0.200 | 0.105  |
| SN34 | 2005 | 287 | 19 | 9 | 52.633 | P | 0.200 | 0.121  |
| CWC  | 2005 | 287 | 19 | 9 | 52.694 | P | 0.200 | -0.102 |
| SN75 | 2005 | 287 | 19 | 9 | 52.796 | P | 0.200 | -0.161 |
| SN14 | 2005 | 287 | 19 | 9 | 52.892 | P | 0.200 | 0.173  |
| SN65 | 2005 | 287 | 19 | 9 | 53.197 | P | 0.200 | -0.009 |
| GSC  | 2005 | 287 | 19 | 9 | 53.291 | P | 0.200 | -0.213 |
| HEC  | 2005 | 287 | 19 | 9 | 53.309 | P | 0.200 | -0.373 |
| SN45 | 2005 | 287 | 19 | 9 | 53.348 | P | 0.200 | -0.108 |
| R05C | 2005 | 287 | 19 | 9 | 53.385 | P | 0.200 | -0.135 |
| MPM  | 2005 | 287 | 19 | 9 | 53.681 | P | 0.200 | 0.125  |
| SN86 | 2005 | 287 | 19 | 9 | 53.719 | P | 0.200 | -0.082 |
| P05C | 2005 | 287 | 19 | 9 | 53.725 | P | 0.200 | 0.090  |
| SN25 | 2005 | 287 | 19 | 9 | 53.771 | P | 0.200 | 0.031  |
| SLA  | 2005 | 287 | 19 | 9 | 53.831 | P | 0.200 | 0.027  |
| SN15 | 2005 | 287 | 19 | 9 | 53.967 | P | 0.200 | 0.244  |
| SN76 | 2005 | 287 | 19 | 9 | 53.982 | P | 0.200 | -0.372 |
| SN56 | 2005 | 287 | 19 | 9 | 54.172 | P | 0.200 | -0.050 |
| SN66 | 2005 | 287 | 19 | 9 | 54.244 | P | 0.200 | -0.062 |
| TIN  | 2005 | 287 | 19 | 9 | 54.380 | P | 0.200 | 0.157  |
| M02C | 2005 | 287 | 19 | 9 | 54.408 | P | 0.200 | 0.616  |
| SN46 | 2005 | 287 | 19 | 9 | 54.555 | P | 0.200 | -0.034 |
| R07C | 2005 | 287 | 19 | 9 | 55.018 | P | 0.200 | 0.052  |
| O05C | 2005 | 287 | 19 | 9 | 55.089 | P | 0.200 | 0.261  |
| R06C | 2005 | 287 | 19 | 9 | 55.180 | P | 0.200 | 0.241  |
| SN67 | 2005 | 287 | 19 | 9 | 55.296 | P | 0.200 | 0.094  |
| SN26 | 2005 | 287 | 19 | 9 | 55.403 | P | 0.200 | 0.340  |
| SN57 | 2005 | 287 | 19 | 9 | 55.546 | P | 0.200 | 0.186  |
| SN16 | 2005 | 287 | 19 | 9 | 55.569 | P | 0.200 | 0.289  |
| M03C | 2005 | 287 | 19 | 9 | 55.682 | P | 0.200 | -0.207 |
| O04C | 2005 | 287 | 19 | 9 | 55.692 | P | 0.200 | 0.019  |
| SN47 | 2005 | 287 | 19 | 9 | 55.867 | P | 0.200 | 0.129  |
| YBH  | 2005 | 287 | 19 | 9 | 55.917 | P | 0.200 | 0.356  |

|      |      |     |    |    |        |   |       |        |
|------|------|-----|----|----|--------|---|-------|--------|
| SN37 | 2005 | 287 | 19 | 9  | 56.052 | P | 0.200 | 0.225  |
| HATC | 2005 | 287 | 19 | 9  | 56.383 | P | 0.200 | 0.022  |
| S08C | 2005 | 287 | 19 | 9  | 56.544 | P | 0.200 | 0.419  |
| SN48 | 2005 | 287 | 19 | 9  | 56.940 | P | 0.200 | -0.053 |
| FUR  | 2005 | 287 | 19 | 9  | 57.057 | P | 0.200 | 0.087  |
| SHO  | 2005 | 287 | 19 | 9  | 57.204 | P | 0.200 | -0.334 |
| TUQ  | 2005 | 287 | 19 | 9  | 57.298 | P | 0.200 | -0.141 |
| SN38 | 2005 | 287 | 19 | 9  | 57.362 | P | 0.200 | 0.110  |
| GRA  | 2005 | 287 | 19 | 9  | 57.595 | P | 0.200 | 0.484  |
| SN28 | 2005 | 287 | 19 | 9  | 57.822 | P | 0.200 | 0.398  |
| HUMO | 2005 | 287 | 19 | 9  | 58.524 | P | 0.200 | 0.414  |
| M04C | 2005 | 287 | 19 | 9  | 58.801 | P | 0.200 | 0.221  |
| MNV  | 2005 | 287 | 19 | 9  | 59.246 | P | 0.200 | 0.061  |
| M05C | 2005 | 287 | 19 | 9  | 59.325 | P | 0.200 | -0.051 |
| M06C | 2005 | 287 | 19 | 10 | 1.195  | P | 0.200 | 0.206  |
| TPH  | 2005 | 287 | 19 | 10 | 1.432  | P | 0.200 | 0.029  |

|      |    |    |    |         |           |           |         |     |        |
|------|----|----|----|---------|-----------|-----------|---------|-----|--------|
| 2006 | 20 | 17 | 51 | 53.5080 | -22.39900 | 173.96700 | 10.0000 | 107 | -0.007 |
|------|----|----|----|---------|-----------|-----------|---------|-----|--------|

|      |      |    |    |   |        |   |       |        |
|------|------|----|----|---|--------|---|-------|--------|
| BNLO | 2006 | 20 | 18 | 4 | 26.068 | P | 0.200 | 0.003  |
| HAST | 2006 | 20 | 18 | 4 | 26.312 | P | 0.200 | 0.251  |
| V04C | 2006 | 20 | 18 | 4 | 26.691 | P | 0.200 | 0.229  |
| SAO  | 2006 | 20 | 18 | 4 | 27.595 | P | 0.200 | 0.014  |
| BKS  | 2006 | 20 | 18 | 4 | 28.032 | P | 0.200 | 0.129  |
| CVS  | 2006 | 20 | 18 | 4 | 28.205 | P | 0.200 | -0.336 |
| LGU  | 2006 | 20 | 18 | 4 | 28.337 | P | 0.200 | -0.485 |
| BRIB | 2006 | 20 | 18 | 4 | 28.426 | P | 0.200 | 0.265  |
| PKD  | 2006 | 20 | 18 | 4 | 28.455 | P | 0.200 | 0.139  |
| MPP  | 2006 | 20 | 18 | 4 | 28.657 | P | 0.200 | 0.336  |
| MHC  | 2006 | 20 | 18 | 4 | 28.772 | P | 0.200 | 0.120  |
| P01C | 2006 | 20 | 18 | 4 | 28.826 | P | 0.200 | 0.109  |
| CIA  | 2006 | 20 | 18 | 4 | 28.882 | P | 0.200 | -0.541 |
| SMM  | 2006 | 20 | 18 | 4 | 29.051 | P | 0.200 | 0.310  |
| PACP | 2006 | 20 | 18 | 4 | 29.100 | P | 0.200 | 0.291  |
| WENL | 2006 | 20 | 18 | 4 | 29.112 | P | 0.200 | 0.426  |
| U04C | 2006 | 20 | 18 | 4 | 29.255 | P | 0.200 | 0.584  |
| BDM  | 2006 | 20 | 18 | 4 | 29.465 | P | 0.200 | 0.264  |
| O01C | 2006 | 20 | 18 | 4 | 29.510 | P | 0.200 | 0.477  |
| S04C | 2006 | 20 | 18 | 4 | 30.065 | P | 0.200 | 0.146  |
| MNRC | 2006 | 20 | 18 | 4 | 30.439 | P | 0.200 | 0.430  |
| V05C | 2006 | 20 | 18 | 4 | 31.083 | P | 0.200 | 0.725  |
| T05C | 2006 | 20 | 18 | 4 | 31.154 | P | 0.200 | 0.628  |
| OSI  | 2006 | 20 | 18 | 4 | 31.303 | P | 0.200 | -0.162 |
| U05C | 2006 | 20 | 18 | 4 | 31.380 | P | 0.200 | 0.600  |
| Q03C | 2006 | 20 | 18 | 4 | 31.545 | P | 0.200 | 1.011  |
| ARV  | 2006 | 20 | 18 | 4 | 31.950 | P | 0.200 | -0.144 |
| GASB | 2006 | 20 | 18 | 4 | 32.271 | P | 0.200 | 0.981  |
| S05C | 2006 | 20 | 18 | 4 | 32.452 | P | 0.200 | -0.393 |
| SUTB | 2006 | 20 | 18 | 4 | 32.509 | P | 0.200 | -0.604 |
| VES  | 2006 | 20 | 18 | 4 | 32.514 | P | 0.200 | -0.477 |
| R04C | 2006 | 20 | 18 | 4 | 32.630 | P | 0.200 | -0.453 |
| N02C | 2006 | 20 | 18 | 4 | 32.787 | P | 0.200 | 0.172  |
| SN71 | 2006 | 20 | 18 | 4 | 32.840 | P | 0.200 | -0.357 |
| Q04C | 2006 | 20 | 18 | 4 | 32.965 | P | 0.200 | -0.192 |
| O02C | 2006 | 20 | 18 | 4 | 33.094 | P | 0.200 | 0.543  |
| SN51 | 2006 | 20 | 18 | 4 | 33.509 | P | 0.200 | 0.122  |
| T06C | 2006 | 20 | 18 | 4 | 33.679 | P | 0.200 | -0.402 |
| BFS  | 2006 | 20 | 18 | 4 | 33.682 | P | 0.200 | -0.476 |
| SN21 | 2006 | 20 | 18 | 4 | 33.699 | P | 0.200 | -0.486 |
| SN52 | 2006 | 20 | 18 | 4 | 34.103 | P | 0.200 | -0.475 |
| O03C | 2006 | 20 | 18 | 4 | 34.122 | P | 0.200 | -0.044 |
| SN62 | 2006 | 20 | 18 | 4 | 34.216 | P | 0.200 | -0.419 |
| CMB  | 2006 | 20 | 18 | 4 | 34.234 | P | 0.200 | -0.180 |
| EDW2 | 2006 | 20 | 18 | 4 | 34.374 | P | 0.200 | -0.117 |

|      |      |    |    |   |        |   |       |        |
|------|------|----|----|---|--------|---|-------|--------|
| WDC  | 2006 | 20 | 18 | 4 | 34.429 | P | 0.200 | 0.122  |
| ORV  | 2006 | 20 | 18 | 4 | 34.599 | P | 0.200 | -0.217 |
| SN73 | 2006 | 20 | 18 | 4 | 34.630 | P | 0.200 | -0.224 |
| ISA  | 2006 | 20 | 18 | 4 | 34.796 | P | 0.200 | -0.018 |
| SN22 | 2006 | 20 | 18 | 4 | 35.003 | P | 0.200 | -0.396 |
| LAVA | 2006 | 20 | 18 | 4 | 35.045 | P | 0.200 | -0.088 |
| HELL | 2006 | 20 | 18 | 4 | 35.132 | P | 0.200 | -0.510 |
| SN53 | 2006 | 20 | 18 | 4 | 35.211 | P | 0.200 | -0.405 |
| S06C | 2006 | 20 | 18 | 4 | 35.645 | P | 0.200 | -0.431 |
| SN23 | 2006 | 20 | 18 | 4 | 36.130 | P | 0.200 | -0.208 |
| M02C | 2006 | 20 | 18 | 4 | 36.157 | P | 0.200 | 0.579  |
| SN85 | 2006 | 20 | 18 | 4 | 36.452 | P | 0.200 | -0.274 |
| SN54 | 2006 | 20 | 18 | 4 | 36.521 | P | 0.200 | -0.271 |
| BBR  | 2006 | 20 | 18 | 4 | 36.775 | P | 0.200 | -0.259 |
| SN44 | 2006 | 20 | 18 | 4 | 36.833 | P | 0.200 | -0.050 |
| LRL  | 2006 | 20 | 18 | 4 | 36.995 | P | 0.200 | -0.138 |
| P05C | 2006 | 20 | 18 | 4 | 37.264 | P | 0.200 | 0.136  |
| YBH  | 2006 | 20 | 18 | 4 | 37.375 | P | 0.200 | 0.416  |
| R05C | 2006 | 20 | 18 | 4 | 37.396 | P | 0.200 | -0.070 |
| M03C | 2006 | 20 | 18 | 4 | 37.511 | P | 0.200 | -0.163 |
| SN34 | 2006 | 20 | 18 | 4 | 37.517 | P | 0.200 | 0.011  |
| RRX  | 2006 | 20 | 18 | 4 | 37.611 | P | 0.200 | -0.343 |
| SN55 | 2006 | 20 | 18 | 4 | 37.630 | P | 0.200 | -0.305 |
| O05C | 2006 | 20 | 18 | 4 | 37.873 | P | 0.200 | 0.183  |
| CWC  | 2006 | 20 | 18 | 4 | 38.138 | P | 0.200 | -0.252 |
| SN76 | 2006 | 20 | 18 | 4 | 38.177 | P | 0.200 | -0.304 |
| O04C | 2006 | 20 | 18 | 4 | 38.294 | P | 0.200 | 0.064  |
| HATC | 2006 | 20 | 18 | 4 | 38.502 | P | 0.200 | 0.015  |
| SN15 | 2006 | 20 | 18 | 4 | 38.861 | P | 0.200 | 0.208  |
| HUMO | 2006 | 20 | 18 | 4 | 38.938 | P | 0.200 | 0.296  |
| TIN  | 2006 | 20 | 18 | 4 | 39.121 | P | 0.200 | -0.133 |
| R06C | 2006 | 20 | 18 | 4 | 39.242 | P | 0.200 | 0.352  |
| R07C | 2006 | 20 | 18 | 4 | 39.294 | P | 0.200 | 0.053  |
| BEK  | 2006 | 20 | 18 | 4 | 39.323 | P | 0.200 | -0.175 |
| MPM  | 2006 | 20 | 18 | 4 | 39.380 | P | 0.200 | 0.091  |
| GSC  | 2006 | 20 | 18 | 4 | 39.553 | P | 0.200 | -0.169 |
| SN36 | 2006 | 20 | 18 | 4 | 39.624 | P | 0.200 | 0.084  |
| HEC  | 2006 | 20 | 18 | 4 | 39.726 | P | 0.200 | -0.404 |
| M04C | 2006 | 20 | 18 | 4 | 39.878 | P | 0.200 | 0.141  |
| SN26 | 2006 | 20 | 18 | 4 | 39.915 | P | 0.200 | 0.251  |
| SN47 | 2006 | 20 | 18 | 4 | 39.950 | P | 0.200 | -0.072 |
| SN16 | 2006 | 20 | 18 | 4 | 40.124 | P | 0.200 | 0.081  |
| SN37 | 2006 | 20 | 18 | 4 | 40.288 | P | 0.200 | 0.076  |
| ELFS | 2006 | 20 | 18 | 4 | 40.431 | P | 0.200 | 0.271  |
| SN48 | 2006 | 20 | 18 | 4 | 40.823 | P | 0.200 | -0.208 |
| M05C | 2006 | 20 | 18 | 4 | 40.892 | P | 0.200 | 0.048  |
| S08C | 2006 | 20 | 18 | 4 | 40.969 | P | 0.200 | 0.258  |
| SN38 | 2006 | 20 | 18 | 4 | 41.242 | P | 0.200 | -0.093 |
| SN28 | 2006 | 20 | 18 | 4 | 41.690 | P | 0.200 | 0.097  |
| GRA  | 2006 | 20 | 18 | 4 | 42.070 | P | 0.200 | 0.185  |
| FUR  | 2006 | 20 | 18 | 4 | 42.104 | P | 0.200 | 0.051  |
| SHO  | 2006 | 20 | 18 | 4 | 42.560 | P | 0.200 | -0.375 |
| M06C | 2006 | 20 | 18 | 4 | 42.752 | P | 0.200 | 0.297  |
| MNV  | 2006 | 20 | 18 | 4 | 42.766 | P | 0.200 | -0.033 |
| TUQ  | 2006 | 20 | 18 | 4 | 42.949 | P | 0.200 | -0.172 |
| TPH  | 2006 | 20 | 18 | 4 | 44.873 | P | 0.200 | -0.172 |

|      |      |     |    |         |           |            |         |        |       |
|------|------|-----|----|---------|-----------|------------|---------|--------|-------|
| 2005 | 328  | 10  | 46 | 39.2268 | -24.27300 | -176.31300 | 35.0000 | 40     | 0.001 |
| SBC  | 2005 | 328 | 10 | 58      | 41.644    | P          | 0.200   | 0.094  |       |
| V04C | 2005 | 328 | 10 | 58      | 41.798    | P          | 0.200   | 0.109  |       |
| RAMR | 2005 | 328 | 10 | 58      | 41.798    | P          | 0.200   | 0.112  |       |
| FARB | 2005 | 328 | 10 | 58      | 41.817    | P          | 0.200   | 0.025  |       |
| CIA  | 2005 | 328 | 10 | 58      | 41.877    | P          | 0.200   | -0.886 |       |

|      |      |     |    |    |        |   |       |        |
|------|------|-----|----|----|--------|---|-------|--------|
| V03C | 2005 | 328 | 10 | 58 | 42.128 | P | 0.200 | 0.478  |
| LGU  | 2005 | 328 | 10 | 58 | 42.215 | P | 0.200 | -0.527 |
| HAST | 2005 | 328 | 10 | 58 | 42.228 | P | 0.200 | 0.277  |
| BNLO | 2005 | 328 | 10 | 58 | 42.538 | P | 0.200 | -0.073 |
| MPP  | 2005 | 328 | 10 | 58 | 43.093 | P | 0.200 | 0.211  |
| JRSC | 2005 | 328 | 10 | 58 | 43.400 | P | 0.200 | 0.173  |
| FMP  | 2005 | 328 | 10 | 58 | 43.642 | P | 0.200 | -0.420 |
| SAO  | 2005 | 328 | 10 | 58 | 43.709 | P | 0.200 | -0.050 |
| PKD  | 2005 | 328 | 10 | 58 | 43.879 | P | 0.200 | 0.108  |
| SMM  | 2005 | 328 | 10 | 58 | 43.936 | P | 0.200 | 0.286  |
| BRK  | 2005 | 328 | 10 | 58 | 44.906 | P | 0.200 | 0.045  |
| DEC  | 2005 | 328 | 10 | 58 | 45.007 | P | 0.200 | -0.681 |
| U04C | 2005 | 328 | 10 | 58 | 45.079 | P | 0.200 | 0.611  |
| BKS  | 2005 | 328 | 10 | 58 | 45.197 | P | 0.200 | 0.162  |
| MHC  | 2005 | 328 | 10 | 58 | 45.451 | P | 0.200 | 0.141  |
| PACP | 2005 | 328 | 10 | 58 | 45.530 | P | 0.200 | 0.367  |
| OSI  | 2005 | 328 | 10 | 58 | 45.564 | P | 0.200 | -0.176 |
| BRIB | 2005 | 328 | 10 | 58 | 45.665 | P | 0.200 | 0.329  |
| CVS  | 2005 | 328 | 10 | 58 | 45.715 | P | 0.200 | -0.370 |
| WENL | 2005 | 328 | 10 | 58 | 45.923 | P | 0.200 | 0.359  |
| V05C | 2005 | 328 | 10 | 58 | 46.447 | P | 0.200 | 0.742  |
| HOPS | 2005 | 328 | 10 | 58 | 46.478 | P | 0.200 | 0.156  |
| ARV  | 2005 | 328 | 10 | 58 | 46.518 | P | 0.200 | -0.273 |
| BDM  | 2005 | 328 | 10 | 58 | 46.699 | P | 0.200 | 0.325  |
| S04C | 2005 | 328 | 10 | 58 | 46.839 | P | 0.200 | 0.151  |
| U05C | 2005 | 328 | 10 | 58 | 46.929 | P | 0.200 | 0.413  |
| T05C | 2005 | 328 | 10 | 58 | 47.287 | P | 0.200 | 0.538  |
| P01C | 2005 | 328 | 10 | 58 | 47.430 | P | 0.200 | 0.164  |
| BFS  | 2005 | 328 | 10 | 58 | 47.610 | P | 0.200 | -0.502 |
| VES  | 2005 | 328 | 10 | 58 | 47.904 | P | 0.200 | -0.360 |
| MNRC | 2005 | 328 | 10 | 58 | 48.414 | P | 0.200 | 0.441  |
| EDW2 | 2005 | 328 | 10 | 58 | 48.762 | P | 0.200 | -0.204 |
| S05C | 2005 | 328 | 10 | 58 | 49.058 | P | 0.200 | -0.325 |
| Q03C | 2005 | 328 | 10 | 58 | 49.328 | P | 0.200 | 1.071  |
| SN71 | 2005 | 328 | 10 | 58 | 49.583 | P | 0.200 | -0.386 |
| T06C | 2005 | 328 | 10 | 58 | 49.920 | P | 0.200 | -0.393 |
| SN11 | 2005 | 328 | 10 | 58 | 49.983 | P | 0.200 | -0.388 |
| R04C | 2005 | 328 | 10 | 58 | 50.002 | P | 0.200 | -0.387 |
| ISA  | 2005 | 328 | 10 | 58 | 50.014 | P | 0.200 | 0.094  |
| SN51 | 2005 | 328 | 10 | 58 | 50.070 | P | 0.200 | 0.231  |
| JCC  | 2005 | 328 | 10 | 58 | 50.194 | P | 0.200 | 0.192  |
| SN52 | 2005 | 328 | 10 | 58 | 50.663 | P | 0.200 | -0.424 |
| SUTB | 2005 | 328 | 10 | 58 | 50.727 | P | 0.200 | -0.523 |
| BBR  | 2005 | 328 | 10 | 58 | 50.803 | P | 0.200 | -0.196 |
| GASB | 2005 | 328 | 10 | 58 | 50.835 | P | 0.200 | 0.961  |
| Q04C | 2005 | 328 | 10 | 58 | 50.885 | P | 0.200 | -0.078 |
| SN62 | 2005 | 328 | 10 | 58 | 50.932 | P | 0.200 | -0.415 |
| HELL | 2005 | 328 | 10 | 58 | 51.020 | P | 0.200 | -0.542 |
| SN22 | 2005 | 328 | 10 | 58 | 51.321 | P | 0.200 | -0.280 |
| CMB  | 2005 | 328 | 10 | 58 | 51.330 | P | 0.200 | -0.175 |
| SN73 | 2005 | 328 | 10 | 58 | 51.688 | P | 0.200 | -0.071 |
| SN53 | 2005 | 328 | 10 | 58 | 51.893 | P | 0.200 | -0.342 |
| LRL  | 2005 | 328 | 10 | 58 | 52.036 | P | 0.200 | -0.005 |
| RRX  | 2005 | 328 | 10 | 58 | 52.065 | P | 0.200 | -0.337 |
| SN84 | 2005 | 328 | 10 | 58 | 52.206 | P | 0.200 | -0.715 |
| N02C | 2005 | 328 | 10 | 58 | 52.334 | P | 0.200 | 0.133  |
| SN23 | 2005 | 328 | 10 | 58 | 52.375 | P | 0.200 | -0.249 |
| SN43 | 2005 | 328 | 10 | 58 | 52.418 | P | 0.200 | -0.182 |
| S06C | 2005 | 328 | 10 | 58 | 52.625 | P | 0.200 | -0.353 |
| SN95 | 2005 | 328 | 10 | 58 | 52.671 | P | 0.200 | -0.511 |
| LAVA | 2005 | 328 | 10 | 58 | 52.782 | P | 0.200 | -0.027 |
| O03C | 2005 | 328 | 10 | 58 | 52.962 | P | 0.200 | 0.009  |
| ORV  | 2005 | 328 | 10 | 58 | 52.985 | P | 0.200 | -0.214 |

|      |      |     |    |    |        |   |       |        |
|------|------|-----|----|----|--------|---|-------|--------|
| SN54 | 2005 | 328 | 10 | 58 | 53.361 | P | 0.200 | -0.210 |
| SN64 | 2005 | 328 | 10 | 58 | 53.365 | P | 0.200 | -0.238 |
| SN44 | 2005 | 328 | 10 | 58 | 53.474 | P | 0.200 | 0.028  |
| SN85 | 2005 | 328 | 10 | 58 | 53.602 | P | 0.200 | -0.369 |
| WDC  | 2005 | 328 | 10 | 58 | 53.683 | P | 0.200 | 0.089  |
| SN34 | 2005 | 328 | 10 | 58 | 54.008 | P | 0.200 | 0.024  |
| HEC  | 2005 | 328 | 10 | 58 | 54.239 | P | 0.200 | -0.296 |
| GSC  | 2005 | 328 | 10 | 58 | 54.335 | P | 0.200 | -0.138 |
| SN55 | 2005 | 328 | 10 | 58 | 54.518 | P | 0.200 | -0.279 |
| MPM  | 2005 | 328 | 10 | 58 | 54.713 | P | 0.200 | 0.047  |
| SN45 | 2005 | 328 | 10 | 58 | 54.713 | P | 0.200 | -0.138 |
| R05C | 2005 | 328 | 10 | 58 | 54.929 | P | 0.200 | -0.117 |
| SN25 | 2005 | 328 | 10 | 58 | 55.063 | P | 0.200 | 0.007  |
| SN86 | 2005 | 328 | 10 | 58 | 55.215 | P | 0.200 | -0.061 |
| P05C | 2005 | 328 | 10 | 58 | 55.309 | P | 0.200 | 0.110  |
| TIN  | 2005 | 328 | 10 | 58 | 55.353 | P | 0.200 | -0.073 |
| SN76 | 2005 | 328 | 10 | 58 | 55.451 | P | 0.200 | -0.300 |
| SN56 | 2005 | 328 | 10 | 58 | 55.553 | P | 0.200 | -0.029 |
| SN66 | 2005 | 328 | 10 | 58 | 55.591 | P | 0.200 | -0.089 |
| SN46 | 2005 | 328 | 10 | 58 | 55.877 | P | 0.200 | -0.036 |
| M02C | 2005 | 328 | 10 | 58 | 56.274 | P | 0.200 | 0.731  |
| R07C | 2005 | 328 | 10 | 58 | 56.274 | P | 0.200 | 0.012  |
| SN36 | 2005 | 328 | 10 | 58 | 56.315 | P | 0.200 | 0.093  |
| O05C | 2005 | 328 | 10 | 58 | 56.557 | P | 0.200 | 0.232  |
| SN67 | 2005 | 328 | 10 | 58 | 56.595 | P | 0.200 | 0.117  |
| SN57 | 2005 | 328 | 10 | 58 | 56.759 | P | 0.200 | 0.158  |
| SN47 | 2005 | 328 | 10 | 58 | 57.077 | P | 0.200 | 0.136  |
| SN37 | 2005 | 328 | 10 | 58 | 57.128 | P | 0.200 | 0.150  |
| O04C | 2005 | 328 | 10 | 58 | 57.170 | P | 0.200 | 0.041  |
| M03C | 2005 | 328 | 10 | 58 | 57.389 | P | 0.200 | -0.049 |
| S08C | 2005 | 328 | 10 | 58 | 57.446 | P | 0.200 | 0.242  |
| YBH  | 2005 | 328 | 10 | 58 | 57.580 | P | 0.200 | 0.424  |
| HATC | 2005 | 328 | 10 | 58 | 57.750 | P | 0.200 | -0.064 |
| FUR  | 2005 | 328 | 10 | 58 | 57.803 | P | 0.200 | 0.074  |
| SN48 | 2005 | 328 | 10 | 58 | 57.990 | P | 0.200 | -0.084 |
| TUQ  | 2005 | 328 | 10 | 58 | 57.998 | P | 0.200 | -0.002 |
| GRA  | 2005 | 328 | 10 | 58 | 58.236 | P | 0.200 | 0.267  |
| SN38 | 2005 | 328 | 10 | 58 | 58.260 | P | 0.200 | -0.005 |
| SN28 | 2005 | 328 | 10 | 58 | 58.680 | P | 0.200 | 0.278  |
| ELFS | 2005 | 328 | 10 | 58 | 59.502 | P | 0.200 | 0.242  |
| MNV  | 2005 | 328 | 10 | 58 | 59.979 | P | 0.200 | -0.051 |
| HUMO | 2005 | 328 | 10 | 58 | 59.991 | P | 0.200 | 0.472  |
| M04C | 2005 | 328 | 10 | 59 | 0.061  | P | 0.200 | 0.209  |
| M05C | 2005 | 328 | 10 | 59 | 0.477  | P | 0.200 | -0.065 |
| TAKO | 2005 | 328 | 10 | 59 | 0.641  | P | 0.200 | 0.330  |
| DBO  | 2005 | 328 | 10 | 59 | 0.732  | P | 0.200 | 0.247  |
| TPNV | 2005 | 328 | 10 | 59 | 1.835  | P | 0.200 | 0.254  |
| TPH  | 2005 | 328 | 10 | 59 | 1.934  | P | 0.200 | -0.035 |
| M06C | 2005 | 328 | 10 | 59 | 2.011  | P | 0.200 | 0.038  |
| I03A | 2005 | 328 | 10 | 59 | 3.516  | P | 0.200 | 0.200  |

2005 278 10 7 22.4287 -20.53500 -174.27699 15.0000

25

0.000

|      |      |     |    |    |       |   |       |        |
|------|------|-----|----|----|-------|---|-------|--------|
| SDP  | 2005 | 278 | 10 | 19 | 3.203 | P | 0.200 | 0.155  |
| SCZ2 | 2005 | 278 | 10 | 19 | 4.060 | P | 0.200 | -0.042 |
| FARB | 2005 | 278 | 10 | 19 | 5.265 | P | 0.200 | 0.000  |
| SBC  | 2005 | 278 | 10 | 19 | 5.384 | P | 0.200 | -0.070 |
| V04C | 2005 | 278 | 10 | 19 | 5.562 | P | 0.200 | 0.137  |
| RAMR | 2005 | 278 | 10 | 19 | 5.563 | P | 0.200 | 0.140  |
| V03C | 2005 | 278 | 10 | 19 | 5.793 | P | 0.200 | 0.444  |
| HAST | 2005 | 278 | 10 | 19 | 5.958 | P | 0.200 | 0.352  |
| BNLO | 2005 | 278 | 10 | 19 | 6.208 | P | 0.200 | 0.001  |
| CIA  | 2005 | 278 | 10 | 19 | 6.324 | P | 0.200 | -0.602 |
| LGU  | 2005 | 278 | 10 | 19 | 6.346 | P | 0.200 | -0.445 |

|      |      |     |    |    |        |   |       |        |
|------|------|-----|----|----|--------|---|-------|--------|
| JRSC | 2005 | 278 | 10 | 19 | 6.939  | P | 0.200 | 0.093  |
| MPP  | 2005 | 278 | 10 | 19 | 7.000  | P | 0.200 | 0.178  |
| SAO  | 2005 | 278 | 10 | 19 | 7.459  | P | 0.200 | -0.020 |
| PKD  | 2005 | 278 | 10 | 19 | 7.709  | P | 0.200 | 0.081  |
| SMM  | 2005 | 278 | 10 | 19 | 7.738  | P | 0.200 | 0.155  |
| FMP  | 2005 | 278 | 10 | 19 | 7.995  | P | 0.200 | -0.300 |
| BRK  | 2005 | 278 | 10 | 19 | 8.601  | P | 0.200 | 0.072  |
| U04C | 2005 | 278 | 10 | 19 | 8.895  | P | 0.200 | 0.576  |
| BKS  | 2005 | 278 | 10 | 19 | 8.898  | P | 0.200 | 0.191  |
| MHC  | 2005 | 278 | 10 | 19 | 9.224  | P | 0.200 | 0.177  |
| PACP | 2005 | 278 | 10 | 19 | 9.248  | P | 0.200 | 0.289  |
| CVS  | 2005 | 278 | 10 | 19 | 9.328  | P | 0.200 | -0.422 |
| BRIB | 2005 | 278 | 10 | 19 | 9.342  | P | 0.200 | 0.306  |
| DEC  | 2005 | 278 | 10 | 19 | 9.344  | P | 0.200 | -0.611 |
| OSI  | 2005 | 278 | 10 | 19 | 9.729  | P | 0.200 | -0.193 |
| WENL | 2005 | 278 | 10 | 19 | 9.755  | P | 0.200 | 0.434  |
| HOPS | 2005 | 278 | 10 | 19 | 10.091 | P | 0.200 | 0.140  |
| V05C | 2005 | 278 | 10 | 19 | 10.380 | P | 0.200 | 0.669  |
| BDM  | 2005 | 278 | 10 | 19 | 10.398 | P | 0.200 | 0.259  |
| S04C | 2005 | 278 | 10 | 19 | 10.658 | P | 0.200 | 0.146  |
| U05C | 2005 | 278 | 10 | 19 | 10.907 | P | 0.200 | 0.390  |
| P01C | 2005 | 278 | 10 | 19 | 11.154 | P | 0.200 | 0.255  |
| T05C | 2005 | 278 | 10 | 19 | 11.192 | P | 0.200 | 0.527  |
| MNRC | 2005 | 278 | 10 | 19 | 12.054 | P | 0.200 | 0.333  |
| BFS  | 2005 | 278 | 10 | 19 | 12.175 | P | 0.200 | -0.381 |
| VES  | 2005 | 278 | 10 | 19 | 12.192 | P | 0.200 | -0.284 |
| RCT  | 2005 | 278 | 10 | 19 | 12.879 | P | 0.200 | -0.738 |
| Q03C | 2005 | 278 | 10 | 19 | 13.032 | P | 0.200 | 0.953  |
| S05C | 2005 | 278 | 10 | 19 | 13.100 | P | 0.200 | -0.346 |
| EDW2 | 2005 | 278 | 10 | 19 | 13.243 | P | 0.200 | -0.135 |
| SN71 | 2005 | 278 | 10 | 19 | 13.642 | P | 0.200 | -0.416 |
| JCC  | 2005 | 278 | 10 | 19 | 14.026 | P | 0.200 | 0.325  |
| R04C | 2005 | 278 | 10 | 19 | 14.060 | P | 0.200 | -0.369 |
| SN51 | 2005 | 278 | 10 | 19 | 14.167 | P | 0.200 | 0.207  |
| T06C | 2005 | 278 | 10 | 19 | 14.175 | P | 0.200 | -0.308 |
| SN11 | 2005 | 278 | 10 | 19 | 14.203 | P | 0.200 | -0.422 |
| ISA  | 2005 | 278 | 10 | 19 | 14.440 | P | 0.200 | 0.164  |
| GASB | 2005 | 278 | 10 | 19 | 14.525 | P | 0.200 | 0.838  |
| SUTB | 2005 | 278 | 10 | 19 | 14.567 | P | 0.200 | -0.636 |
| Q04C | 2005 | 278 | 10 | 19 | 14.815 | P | 0.200 | -0.152 |
| SN52 | 2005 | 278 | 10 | 19 | 14.880 | P | 0.200 | -0.401 |
| SN62 | 2005 | 278 | 10 | 19 | 15.082 | P | 0.200 | -0.438 |
| BBR  | 2005 | 278 | 10 | 19 | 15.317 | P | 0.200 | -0.320 |
| HELL | 2005 | 278 | 10 | 19 | 15.361 | P | 0.200 | -0.519 |
| CMB  | 2005 | 278 | 10 | 19 | 15.491 | P | 0.200 | -0.149 |
| SN22 | 2005 | 278 | 10 | 19 | 15.562 | P | 0.200 | -0.302 |
| SN73 | 2005 | 278 | 10 | 19 | 15.739 | P | 0.200 | -0.199 |
| SN53 | 2005 | 278 | 10 | 19 | 16.114 | P | 0.200 | -0.372 |
| N02C | 2005 | 278 | 10 | 19 | 16.222 | P | 0.200 | 0.166  |
| SN84 | 2005 | 278 | 10 | 19 | 16.440 | P | 0.200 | -0.688 |
| LRL  | 2005 | 278 | 10 | 19 | 16.551 | P | 0.200 | -0.040 |
| RRX  | 2005 | 278 | 10 | 19 | 16.707 | P | 0.200 | -0.370 |
| SN23 | 2005 | 278 | 10 | 19 | 16.715 | P | 0.200 | -0.213 |
| SN43 | 2005 | 278 | 10 | 19 | 16.724 | P | 0.200 | -0.162 |
| LAVA | 2005 | 278 | 10 | 19 | 16.851 | P | 0.200 | -0.102 |
| SN74 | 2005 | 278 | 10 | 19 | 16.875 | P | 0.200 | -0.279 |
| SN95 | 2005 | 278 | 10 | 19 | 16.901 | P | 0.200 | -0.487 |
| O03C | 2005 | 278 | 10 | 19 | 16.955 | P | 0.200 | -0.013 |
| ORV  | 2005 | 278 | 10 | 19 | 17.085 | P | 0.200 | -0.176 |
| WDC  | 2005 | 278 | 10 | 19 | 17.600 | P | 0.200 | 0.025  |
| SN54 | 2005 | 278 | 10 | 19 | 17.697 | P | 0.200 | -0.188 |
| SN64 | 2005 | 278 | 10 | 19 | 17.784 | P | 0.200 | -0.114 |
| SN44 | 2005 | 278 | 10 | 19 | 17.840 | P | 0.200 | 0.051  |



|      |      |     |    |    |        |   |       |        |
|------|------|-----|----|----|--------|---|-------|--------|
| SN85 | 2005 | 278 | 10 | 19 | 17.898 | P | 0.200 | -0.343 |
| SN24 | 2005 | 278 | 10 | 19 | 18.300 | P | 0.200 | 0.161  |
| CWC  | 2005 | 278 | 10 | 19 | 18.441 | P | 0.200 | -0.155 |
| SN34 | 2005 | 278 | 10 | 19 | 18.516 | P | 0.200 | 0.159  |
| SN55 | 2005 | 278 | 10 | 19 | 18.965 | P | 0.200 | -0.197 |
| HEC  | 2005 | 278 | 10 | 19 | 19.053 | P | 0.200 | -0.316 |
| GSC  | 2005 | 278 | 10 | 19 | 19.112 | P | 0.200 | -0.104 |
| R05C | 2005 | 278 | 10 | 19 | 19.148 | P | 0.200 | -0.179 |
| SN45 | 2005 | 278 | 10 | 19 | 19.198 | P | 0.200 | -0.051 |
| MPM  | 2005 | 278 | 10 | 19 | 19.430 | P | 0.200 | 0.131  |
| SN25 | 2005 | 278 | 10 | 19 | 19.455 | P | 0.200 | -0.063 |
| SN86 | 2005 | 278 | 10 | 19 | 19.521 | P | 0.200 | -0.077 |
| P05C | 2005 | 278 | 10 | 19 | 19.580 | P | 0.200 | 0.143  |
| SN15 | 2005 | 278 | 10 | 19 | 19.796 | P | 0.200 | 0.300  |
| SN76 | 2005 | 278 | 10 | 19 | 19.861 | P | 0.200 | -0.260 |
| SN66 | 2005 | 278 | 10 | 19 | 19.971 | P | 0.200 | -0.107 |
| TIN  | 2005 | 278 | 10 | 19 | 19.981 | P | 0.200 | 0.015  |
| SN56 | 2005 | 278 | 10 | 19 | 20.000 | P | 0.200 | 0.004  |
| M02C | 2005 | 278 | 10 | 19 | 20.150 | P | 0.200 | 0.566  |
| SN46 | 2005 | 278 | 10 | 19 | 20.418 | P | 0.200 | 0.065  |
| R07C | 2005 | 278 | 10 | 19 | 20.765 | P | 0.200 | 0.054  |
| O05C | 2005 | 278 | 10 | 19 | 20.797 | P | 0.200 | 0.214  |
| SN36 | 2005 | 278 | 10 | 19 | 20.908 | P | 0.200 | 0.176  |
| R06C | 2005 | 278 | 10 | 19 | 20.930 | P | 0.200 | 0.239  |
| SN67 | 2005 | 278 | 10 | 19 | 20.983 | P | 0.200 | 0.043  |
| SN16 | 2005 | 278 | 10 | 19 | 21.140 | P | 0.200 | 0.132  |
| SN57 | 2005 | 278 | 10 | 19 | 21.275 | P | 0.200 | 0.185  |
| M03C | 2005 | 278 | 10 | 19 | 21.404 | P | 0.200 | -0.212 |
| O04C | 2005 | 278 | 10 | 19 | 21.422 | P | 0.200 | 0.020  |
| SN47 | 2005 | 278 | 10 | 19 | 21.582 | P | 0.200 | 0.126  |
| YBH  | 2005 | 278 | 10 | 19 | 21.691 | P | 0.200 | 0.401  |
| SN37 | 2005 | 278 | 10 | 19 | 21.710 | P | 0.200 | 0.178  |
| HATC | 2005 | 278 | 10 | 19 | 22.090 | P | 0.200 | 0.017  |
| S08C | 2005 | 278 | 10 | 19 | 22.186 | P | 0.200 | 0.364  |
| SN48 | 2005 | 278 | 10 | 19 | 22.609 | P | 0.200 | -0.061 |
| FUR  | 2005 | 278 | 10 | 19 | 22.718 | P | 0.200 | 0.138  |
| SHO  | 2005 | 278 | 10 | 19 | 22.834 | P | 0.200 | -0.278 |
| TUQ  | 2005 | 278 | 10 | 19 | 22.918 | P | 0.200 | -0.088 |
| SN38 | 2005 | 278 | 10 | 19 | 22.965 | P | 0.200 | 0.054  |
| GRA  | 2005 | 278 | 10 | 19 | 23.075 | P | 0.200 | 0.328  |
| SN28 | 2005 | 278 | 10 | 19 | 23.366 | P | 0.200 | 0.294  |
| ELFS | 2005 | 278 | 10 | 19 | 23.927 | P | 0.200 | 0.260  |
| HUMO | 2005 | 278 | 10 | 19 | 24.194 | P | 0.200 | 0.455  |
| M04C | 2005 | 278 | 10 | 19 | 24.416 | P | 0.200 | 0.225  |
| MNV  | 2005 | 278 | 10 | 19 | 24.777 | P | 0.200 | 0.015  |
| M05C | 2005 | 278 | 10 | 19 | 24.918 | P | 0.200 | -0.049 |
| DBO  | 2005 | 278 | 10 | 19 | 24.963 | P | 0.200 | 0.214  |
| M06C | 2005 | 278 | 10 | 19 | 26.677 | P | 0.200 | 0.159  |
| TPH  | 2005 | 278 | 10 | 19 | 26.871 | P | 0.200 | -0.014 |
| BMN  | 2005 | 278 | 10 | 19 | 34.340 | P | 0.200 | -0.085 |

|      |      |     |    |        |           |            |         |        |       |
|------|------|-----|----|--------|-----------|------------|---------|--------|-------|
| 2005 | 347  | 3   | 16 | 6.0095 | -15.26500 | -178.57100 | 10.0000 | 46     | 0.000 |
| FARB | 2005 | 347 | 3  | 27     | 42.316    | P          | 0.200   | -0.252 |       |
| SDP  | 2005 | 347 | 3  | 27     | 42.847    | P          | 0.200   | -0.042 |       |
| BNLO | 2005 | 347 | 3  | 27     | 44.155    | P          | 0.200   | 0.052  |       |
| HAST | 2005 | 347 | 3  | 27     | 44.314    | P          | 0.200   | 0.199  |       |
| V03C | 2005 | 347 | 3  | 27     | 44.455    | P          | 0.200   | 0.286  |       |
| JRSC | 2005 | 347 | 3  | 27     | 44.528    | P          | 0.200   | -0.062 |       |
| SCZ2 | 2005 | 347 | 3  | 27     | 44.577    | P          | 0.200   | -0.010 |       |
| V04C | 2005 | 347 | 3  | 27     | 44.659    | P          | 0.200   | 0.079  |       |
| RAMR | 2005 | 347 | 3  | 27     | 44.659    | P          | 0.200   | 0.081  |       |
| SBC  | 2005 | 347 | 3  | 27     | 45.733    | P          | 0.200   | 0.095  |       |
| SAO  | 2005 | 347 | 3  | 27     | 45.866    | P          | 0.200   | 0.024  |       |

|      |      |     |   |    |        |   |       |        |
|------|------|-----|---|----|--------|---|-------|--------|
| BRK  | 2005 | 347 | 3 | 27 | 46.053 | P | 0.200 | 0.019  |
| BKS  | 2005 | 347 | 3 | 27 | 46.308 | P | 0.200 | 0.082  |
| CVS  | 2005 | 347 | 3 | 27 | 46.528 | P | 0.200 | -0.420 |
| HOPS | 2005 | 347 | 3 | 27 | 46.551 | P | 0.200 | -0.054 |
| BRIB | 2005 | 347 | 3 | 27 | 46.814 | P | 0.200 | 0.255  |
| PKD  | 2005 | 347 | 3 | 27 | 46.868 | P | 0.200 | 0.128  |
| MPP  | 2005 | 347 | 3 | 27 | 47.126 | P | 0.200 | 0.364  |
| LGU  | 2005 | 347 | 3 | 27 | 47.157 | P | 0.200 | -0.227 |
| MHC  | 2005 | 347 | 3 | 27 | 47.220 | P | 0.200 | 0.183  |
| P01C | 2005 | 347 | 3 | 27 | 47.391 | P | 0.200 | 0.158  |
| SMM  | 2005 | 347 | 3 | 27 | 47.474 | P | 0.200 | 0.252  |
| PACP | 2005 | 347 | 3 | 27 | 47.493 | P | 0.200 | 0.234  |
| WENL | 2005 | 347 | 3 | 27 | 47.520 | P | 0.200 | 0.365  |
| U04C | 2005 | 347 | 3 | 27 | 47.602 | P | 0.200 | 0.460  |
| CIA  | 2005 | 347 | 3 | 27 | 47.848 | P | 0.200 | -0.285 |
| O01C | 2005 | 347 | 3 | 27 | 48.023 | P | 0.200 | 0.374  |
| BDM  | 2005 | 347 | 3 | 27 | 48.511 | P | 0.200 | 0.756  |
| S04C | 2005 | 347 | 3 | 27 | 48.843 | P | 0.200 | 0.306  |
| MNRC | 2005 | 347 | 3 | 27 | 49.108 | P | 0.200 | 0.434  |
| FMP  | 2005 | 347 | 3 | 27 | 49.141 | P | 0.200 | -0.262 |
| JCC  | 2005 | 347 | 3 | 27 | 49.544 | P | 0.200 | 0.383  |
| V05C | 2005 | 347 | 3 | 27 | 49.563 | P | 0.200 | 0.463  |
| T05C | 2005 | 347 | 3 | 27 | 49.771 | P | 0.200 | 0.537  |
| Q03C | 2005 | 347 | 3 | 27 | 50.064 | P | 0.200 | 0.750  |
| U05C | 2005 | 347 | 3 | 27 | 50.171 | P | 0.200 | 0.579  |
| OSI  | 2005 | 347 | 3 | 27 | 50.240 | P | 0.200 | -0.146 |
| DEC  | 2005 | 347 | 3 | 27 | 50.634 | P | 0.200 | -0.124 |
| GASB | 2005 | 347 | 3 | 27 | 50.766 | P | 0.200 | 0.582  |
| ARV  | 2005 | 347 | 3 | 27 | 51.454 | P | 0.200 | 0.273  |
| SUTB | 2005 | 347 | 3 | 27 | 51.504 | P | 0.200 | -0.743 |
| S05C | 2005 | 347 | 3 | 27 | 51.531 | P | 0.200 | -0.397 |
| VES  | 2005 | 347 | 3 | 27 | 51.831 | P | 0.200 | -0.339 |
| R04C | 2005 | 347 | 3 | 27 | 52.023 | P | 0.200 | -0.224 |
| SN71 | 2005 | 347 | 3 | 27 | 52.049 | P | 0.200 | -0.313 |
| N02C | 2005 | 347 | 3 | 27 | 52.116 | P | 0.200 | 0.321  |
| Q04C | 2005 | 347 | 3 | 27 | 52.238 | P | 0.200 | -0.103 |
| RCT  | 2005 | 347 | 3 | 27 | 52.373 | P | 0.200 | -0.647 |
| SN51 | 2005 | 347 | 3 | 27 | 52.492 | P | 0.200 | -0.096 |
| T06C | 2005 | 347 | 3 | 27 | 53.099 | P | 0.200 | -0.246 |
| SN11 | 2005 | 347 | 3 | 27 | 53.323 | P | 0.200 | -0.487 |
| O03C | 2005 | 347 | 3 | 27 | 53.347 | P | 0.200 | -0.206 |
| BFS  | 2005 | 347 | 3 | 27 | 53.454 | P | 0.200 | -0.145 |
| SN62 | 2005 | 347 | 3 | 27 | 53.510 | P | 0.200 | -0.481 |
| SN52 | 2005 | 347 | 3 | 27 | 53.648 | P | 0.200 | -0.293 |
| CMB  | 2005 | 347 | 3 | 27 | 53.713 | P | 0.200 | -0.046 |
| WDC  | 2005 | 347 | 3 | 27 | 53.739 | P | 0.200 | 0.023  |
| SN73 | 2005 | 347 | 3 | 27 | 53.963 | P | 0.200 | -0.290 |
| EDW2 | 2005 | 347 | 3 | 27 | 54.014 | P | 0.200 | 0.058  |
| ORV  | 2005 | 347 | 3 | 27 | 54.027 | P | 0.200 | -0.199 |
| ISA  | 2005 | 347 | 3 | 27 | 54.386 | P | 0.200 | 0.108  |
| LAVA | 2005 | 347 | 3 | 27 | 54.447 | P | 0.200 | -0.146 |
| SN22 | 2005 | 347 | 3 | 27 | 54.508 | P | 0.200 | -0.351 |
| HELL | 2005 | 347 | 3 | 27 | 54.742 | P | 0.200 | -0.427 |
| SN53 | 2005 | 347 | 3 | 27 | 54.847 | P | 0.200 | -0.255 |
| SN95 | 2005 | 347 | 3 | 27 | 54.976 | P | 0.200 | -0.432 |
| S06C | 2005 | 347 | 3 | 27 | 55.137 | P | 0.200 | -0.464 |
| SN74 | 2005 | 347 | 3 | 27 | 55.184 | P | 0.200 | -0.266 |
| SN43 | 2005 | 347 | 3 | 27 | 55.574 | P | 0.200 | -0.047 |
| SN23 | 2005 | 347 | 3 | 27 | 55.756 | P | 0.200 | -0.148 |
| M02C | 2005 | 347 | 3 | 27 | 55.815 | P | 0.200 | 0.570  |
| SN85 | 2005 | 347 | 3 | 27 | 56.203 | P | 0.200 | -0.181 |
| SN64 | 2005 | 347 | 3 | 27 | 56.253 | P | 0.200 | -0.097 |
| SN54 | 2005 | 347 | 3 | 27 | 56.328 | P | 0.200 | -0.120 |

|      |      |     |   |    |        |   |       |        |
|------|------|-----|---|----|--------|---|-------|--------|
| SN44 | 2005 | 347 | 3 | 27 | 56.720 | P | 0.200 | 0.142  |
| P05C | 2005 | 347 | 3 | 27 | 56.865 | P | 0.200 | -0.027 |
| BBR  | 2005 | 347 | 3 | 27 | 56.881 | P | 0.200 | -0.012 |
| R05C | 2005 | 347 | 3 | 27 | 57.108 | P | 0.200 | -0.130 |
| LRL  | 2005 | 347 | 3 | 27 | 57.213 | P | 0.200 | 0.242  |
| YBH  | 2005 | 347 | 3 | 27 | 57.263 | P | 0.200 | 0.410  |
| SN34 | 2005 | 347 | 3 | 27 | 57.276 | P | 0.200 | 0.033  |
| M03C | 2005 | 347 | 3 | 27 | 57.291 | P | 0.200 | -0.299 |
| SN86 | 2005 | 347 | 3 | 27 | 57.628 | P | 0.200 | -0.070 |
| SN55 | 2005 | 347 | 3 | 27 | 57.638 | P | 0.200 | -0.099 |
| O05C | 2005 | 347 | 3 | 27 | 57.663 | P | 0.200 | 0.068  |
| RRX  | 2005 | 347 | 3 | 27 | 57.668 | P | 0.200 | -0.313 |
| SN45 | 2005 | 347 | 3 | 27 | 58.106 | P | 0.200 | 0.092  |
| O04C | 2005 | 347 | 3 | 27 | 58.114 | P | 0.200 | -0.098 |
| HATC | 2005 | 347 | 3 | 27 | 58.172 | P | 0.200 | -0.328 |
| SN76 | 2005 | 347 | 3 | 27 | 58.335 | P | 0.200 | -0.061 |
| CWC  | 2005 | 347 | 3 | 27 | 58.421 | P | 0.200 | 0.104  |
| SN25 | 2005 | 347 | 3 | 27 | 58.706 | P | 0.200 | 0.124  |
| SN15 | 2005 | 347 | 3 | 27 | 58.773 | P | 0.200 | 0.146  |
| R06C | 2005 | 347 | 3 | 27 | 58.948 | P | 0.200 | 0.043  |
| SN46 | 2005 | 347 | 3 | 27 | 59.140 | P | 0.200 | 0.014  |
| HUMO | 2005 | 347 | 3 | 27 | 59.154 | P | 0.200 | 0.320  |
| R07C | 2005 | 347 | 3 | 27 | 59.185 | P | 0.200 | -0.091 |
| TIN  | 2005 | 347 | 3 | 27 | 59.298 | P | 0.200 | -0.038 |
| DBO  | 2005 | 347 | 3 | 27 | 59.506 | P | 0.200 | -0.032 |
| SN57 | 2005 | 347 | 3 | 27 | 59.647 | P | 0.200 | -0.026 |
| MPM  | 2005 | 347 | 3 | 27 | 59.707 | P | 0.200 | 0.272  |
| SN36 | 2005 | 347 | 3 | 27 | 59.817 | P | 0.200 | 0.163  |
| SN26 | 2005 | 347 | 3 | 27 | 59.901 | P | 0.200 | 0.079  |
| GSC  | 2005 | 347 | 3 | 28 | 0.011  | P | 0.200 | 0.019  |
| M04C | 2005 | 347 | 3 | 28 | 0.134  | P | 0.200 | 0.082  |
| SN47 | 2005 | 347 | 3 | 28 | 0.167  | P | 0.200 | -0.014 |
| HEC  | 2005 | 347 | 3 | 28 | 0.355  | P | 0.200 | -0.169 |
| ELFS | 2005 | 347 | 3 | 28 | 0.411  | P | 0.200 | -0.038 |
| SN37 | 2005 | 347 | 3 | 28 | 0.538  | P | 0.200 | 0.117  |
| M05C | 2005 | 347 | 3 | 28 | 1.121  | P | 0.200 | -0.145 |
| SN48 | 2005 | 347 | 3 | 28 | 1.209  | P | 0.200 | -0.150 |
| SN38 | 2005 | 347 | 3 | 28 | 1.894  | P | 0.200 | 0.143  |
| I03A | 2005 | 347 | 3 | 28 | 2.127  | P | 0.200 | 0.015  |
| SN28 | 2005 | 347 | 3 | 28 | 2.138  | P | 0.200 | 0.094  |
| GRA  | 2005 | 347 | 3 | 28 | 2.513  | P | 0.200 | 0.081  |
| FUR  | 2005 | 347 | 3 | 28 | 2.843  | P | 0.200 | 0.133  |
| M06C | 2005 | 347 | 3 | 28 | 3.137  | P | 0.200 | 0.003  |
| MNV  | 2005 | 347 | 3 | 28 | 3.287  | P | 0.200 | -0.176 |
| SHO  | 2005 | 347 | 3 | 28 | 3.493  | P | 0.200 | -0.224 |
| TUQ  | 2005 | 347 | 3 | 28 | 3.882  | P | 0.200 | -0.089 |
| TPH  | 2005 | 347 | 3 | 28 | 5.917  | P | 0.200 | -0.177 |
| TPNV | 2005 | 347 | 3 | 28 | 6.831  | P | 0.200 | 0.104  |

|      |      |     |    |         |           |            |          |        |        |
|------|------|-----|----|---------|-----------|------------|----------|--------|--------|
| 2006 | 153  | 7   | 31 | 37.2831 | -20.83700 | -178.70100 | 591.6000 | 135    | -0.006 |
| FARB | 2006 | 153 | 7  | 42      | 37.097    | P          | 0.200    | 0.027  |        |
| SCZ2 | 2006 | 153 | 7  | 42      | 37.279    | P          | 0.200    | 0.036  |        |
| BNLO | 2006 | 153 | 7  | 42      | 38.121    | P          | 0.200    | -0.073 |        |
| HAST | 2006 | 153 | 7  | 42      | 38.155    | P          | 0.200    | 0.273  |        |
| V04C | 2006 | 153 | 7  | 42      | 38.182    | P          | 0.200    | 0.206  |        |
| V03C | 2006 | 153 | 7  | 42      | 38.327    | P          | 0.200    | 0.572  |        |
| JRSC | 2006 | 153 | 7  | 42      | 38.777    | P          | 0.200    | 0.070  |        |
| MCCM | 2006 | 153 | 7  | 42      | 38.853    | P          | 0.200    | -0.061 |        |
| LGU  | 2006 | 153 | 7  | 42      | 39.367    | P          | 0.200    | -0.411 |        |
| SAO  | 2006 | 153 | 7  | 42      | 39.499    | P          | 0.200    | -0.055 |        |
| CIA  | 2006 | 153 | 7  | 42      | 39.566    | P          | 0.200    | -0.570 |        |
| MPP  | 2006 | 153 | 7  | 42      | 39.871    | P          | 0.200    | 0.313  |        |
| PKD  | 2006 | 153 | 7  | 42      | 40.032    | P          | 0.200    | 0.066  |        |

|      |      |     |   |    |        |   |       |        |
|------|------|-----|---|----|--------|---|-------|--------|
| BRK  | 2006 | 153 | 7 | 42 | 40.211 | P | 0.200 | 0.055  |
| SMM  | 2006 | 153 | 7 | 42 | 40.484 | P | 0.200 | 0.338  |
| BKS  | 2006 | 153 | 7 | 42 | 40.503 | P | 0.200 | 0.163  |
| CVS  | 2006 | 153 | 7 | 42 | 40.829 | P | 0.200 | -0.356 |
| BRIB | 2006 | 153 | 7 | 42 | 40.917 | P | 0.200 | 0.290  |
| MHC  | 2006 | 153 | 7 | 42 | 40.969 | P | 0.200 | 0.102  |
| FMP  | 2006 | 153 | 7 | 42 | 41.020 | P | 0.200 | -0.320 |
| U04C | 2006 | 153 | 7 | 42 | 41.101 | P | 0.200 | 0.613  |
| PACP | 2006 | 153 | 7 | 42 | 41.209 | P | 0.200 | 0.327  |
| HOPS | 2006 | 153 | 7 | 42 | 41.241 | P | 0.200 | 0.121  |
| WENL | 2006 | 153 | 7 | 42 | 41.377 | P | 0.200 | 0.365  |
| DJJ  | 2006 | 153 | 7 | 42 | 41.404 | P | 0.200 | -0.448 |
| BDM  | 2006 | 153 | 7 | 42 | 41.971 | P | 0.200 | 0.290  |
| P01C | 2006 | 153 | 7 | 42 | 41.996 | P | 0.200 | 0.134  |
| DEC  | 2006 | 153 | 7 | 42 | 42.123 | P | 0.200 | -0.622 |
| S04C | 2006 | 153 | 7 | 42 | 42.383 | P | 0.200 | 0.171  |
| OSI  | 2006 | 153 | 7 | 42 | 42.554 | P | 0.200 | -0.074 |
| V05C | 2006 | 153 | 7 | 42 | 42.747 | P | 0.200 | 0.751  |
| U05C | 2006 | 153 | 7 | 42 | 43.032 | P | 0.200 | 0.430  |
| O01C | 2006 | 153 | 7 | 42 | 43.083 | P | 0.200 | 0.599  |
| T05C | 2006 | 153 | 7 | 42 | 43.125 | P | 0.200 | 0.553  |
| MNRC | 2006 | 153 | 7 | 42 | 43.292 | P | 0.200 | 0.404  |
| ARV  | 2006 | 153 | 7 | 42 | 43.303 | P | 0.200 | -0.161 |
| MWC  | 2006 | 153 | 7 | 42 | 43.420 | P | 0.200 | -0.524 |
| CHF  | 2006 | 153 | 7 | 42 | 43.757 | P | 0.200 | -0.476 |
| VES  | 2006 | 153 | 7 | 42 | 44.246 | P | 0.200 | -0.402 |
| Q03C | 2006 | 153 | 7 | 42 | 44.292 | P | 0.200 | 0.985  |
| S05C | 2006 | 153 | 7 | 42 | 44.720 | P | 0.200 | -0.370 |
| BFS  | 2006 | 153 | 7 | 42 | 44.792 | P | 0.200 | -0.449 |
| RCT  | 2006 | 153 | 7 | 42 | 44.938 | P | 0.200 | -0.663 |
| SN71 | 2006 | 153 | 7 | 42 | 45.130 | P | 0.200 | -0.427 |
| GASB | 2006 | 153 | 7 | 42 | 45.413 | P | 0.200 | 0.917  |
| SUTB | 2006 | 153 | 7 | 42 | 45.610 | P | 0.200 | -0.522 |
| SN21 | 2006 | 153 | 7 | 42 | 45.768 | P | 0.200 | -0.455 |
| EDW2 | 2006 | 153 | 7 | 42 | 45.770 | P | 0.200 | -0.042 |
| SN51 | 2006 | 153 | 7 | 42 | 45.793 | P | 0.200 | 0.191  |
| T06C | 2006 | 153 | 7 | 42 | 45.870 | P | 0.200 | -0.332 |
| Q04C | 2006 | 153 | 7 | 42 | 45.900 | P | 0.200 | -0.118 |
| SN11 | 2006 | 153 | 7 | 42 | 45.985 | P | 0.200 | -0.433 |
| SN52 | 2006 | 153 | 7 | 42 | 46.379 | P | 0.200 | -0.460 |
| ISA  | 2006 | 153 | 7 | 42 | 46.532 | P | 0.200 | 0.104  |
| N02C | 2006 | 153 | 7 | 42 | 46.596 | P | 0.200 | 0.245  |
| O02C | 2006 | 153 | 7 | 42 | 46.663 | P | 0.200 | 0.667  |
| CMB  | 2006 | 153 | 7 | 42 | 46.688 | P | 0.200 | -0.264 |
| HELL | 2006 | 153 | 7 | 42 | 47.059 | P | 0.200 | -0.582 |
| SN73 | 2006 | 153 | 7 | 42 | 47.100 | P | 0.200 | -0.205 |
| SN22 | 2006 | 153 | 7 | 42 | 47.254 | P | 0.200 | -0.277 |
| SN84 | 2006 | 153 | 7 | 42 | 47.647 | P | 0.200 | -0.698 |
| O03C | 2006 | 153 | 7 | 42 | 47.653 | P | 0.200 | 0.125  |
| ORV  | 2006 | 153 | 7 | 42 | 47.838 | P | 0.200 | -0.144 |
| LAVA | 2006 | 153 | 7 | 42 | 47.897 | P | 0.200 | -0.063 |
| BBR  | 2006 | 153 | 7 | 42 | 48.041 | P | 0.200 | -0.137 |
| WDC  | 2006 | 153 | 7 | 42 | 48.117 | P | 0.200 | 0.198  |
| S06C | 2006 | 153 | 7 | 42 | 48.144 | P | 0.200 | -0.403 |
| SN23 | 2006 | 153 | 7 | 42 | 48.232 | P | 0.200 | -0.288 |
| LRL  | 2006 | 153 | 7 | 42 | 48.696 | P | 0.200 | -0.005 |
| SN85 | 2006 | 153 | 7 | 42 | 49.017 | P | 0.200 | -0.350 |
| SN54 | 2006 | 153 | 7 | 42 | 49.017 | P | 0.200 | -0.199 |
| SN44 | 2006 | 153 | 7 | 42 | 49.138 | P | 0.200 | -0.067 |
| RRX  | 2006 | 153 | 7 | 42 | 49.163 | P | 0.200 | -0.177 |
| CWC  | 2006 | 153 | 7 | 42 | 50.055 | P | 0.200 | -0.278 |
| SN55 | 2006 | 153 | 7 | 42 | 50.141 | P | 0.200 | -0.274 |
| L02A | 2006 | 153 | 7 | 42 | 50.174 | P | 0.200 | 0.384  |

|      |      |     |   |    |        |   |       |        |
|------|------|-----|---|----|--------|---|-------|--------|
| P05C | 2006 | 153 | 7 | 42 | 50.347 | P | 0.200 | 0.167  |
| M02C | 2006 | 153 | 7 | 42 | 50.352 | P | 0.200 | 0.802  |
| SN76 | 2006 | 153 | 7 | 42 | 50.883 | P | 0.200 | -0.286 |
| SN25 | 2006 | 153 | 7 | 42 | 50.885 | P | 0.200 | -0.034 |
| SN66 | 2006 | 153 | 7 | 42 | 51.006 | P | 0.200 | -0.175 |
| MPM  | 2006 | 153 | 7 | 42 | 51.074 | P | 0.200 | -0.040 |
| GSC  | 2006 | 153 | 7 | 42 | 51.088 | P | 0.200 | -0.188 |
| SN15 | 2006 | 153 | 7 | 42 | 51.097 | P | 0.200 | 0.178  |
| O05C | 2006 | 153 | 7 | 42 | 51.184 | P | 0.200 | 0.153  |
| HEC  | 2006 | 153 | 7 | 42 | 51.259 | P | 0.200 | -0.280 |
| TIN  | 2006 | 153 | 7 | 42 | 51.381 | P | 0.200 | -0.062 |
| M03C | 2006 | 153 | 7 | 42 | 51.541 | P | 0.200 | -0.037 |
| SN46 | 2006 | 153 | 7 | 42 | 51.577 | P | 0.200 | -0.023 |
| YBH  | 2006 | 153 | 7 | 42 | 51.614 | P | 0.200 | 0.543  |
| R07C | 2006 | 153 | 7 | 42 | 51.850 | P | 0.200 | 0.025  |
| O04C | 2006 | 153 | 7 | 42 | 51.857 | P | 0.200 | 0.146  |
| R06C | 2006 | 153 | 7 | 42 | 51.917 | P | 0.200 | 0.277  |
| SN36 | 2006 | 153 | 7 | 42 | 51.976 | P | 0.200 | 0.011  |
| SN67 | 2006 | 153 | 7 | 42 | 52.042 | P | 0.200 | 0.078  |
| SN16 | 2006 | 153 | 7 | 42 | 52.255 | P | 0.200 | -0.091 |
| SN57 | 2006 | 153 | 7 | 42 | 52.323 | P | 0.200 | 0.173  |
| SN26 | 2006 | 153 | 7 | 42 | 52.328 | P | 0.200 | 0.279  |
| HATC | 2006 | 153 | 7 | 42 | 52.328 | P | 0.200 | 0.141  |
| K02A | 2006 | 153 | 7 | 42 | 52.420 | P | 0.200 | 0.463  |
| SN47 | 2006 | 153 | 7 | 42 | 52.523 | P | 0.200 | -0.049 |
| BEK  | 2006 | 153 | 7 | 42 | 52.648 | P | 0.200 | -0.148 |
| SN37 | 2006 | 153 | 7 | 42 | 52.700 | P | 0.200 | 0.010  |
| WCN  | 2006 | 153 | 7 | 42 | 53.107 | P | 0.200 | 0.166  |
| S08C | 2006 | 153 | 7 | 42 | 53.218 | P | 0.200 | 0.150  |
| SN48 | 2006 | 153 | 7 | 42 | 53.435 | P | 0.200 | -0.228 |
| HUMO | 2006 | 153 | 7 | 42 | 53.713 | P | 0.200 | 0.575  |
| SN38 | 2006 | 153 | 7 | 42 | 53.766 | P | 0.200 | -0.152 |
| P06A | 2006 | 153 | 7 | 42 | 53.782 | P | 0.200 | 0.147  |
| FUR  | 2006 | 153 | 7 | 42 | 53.967 | P | 0.200 | -0.119 |
| J02A | 2006 | 153 | 7 | 42 | 53.996 | P | 0.200 | 0.390  |
| ELFS | 2006 | 153 | 7 | 42 | 54.076 | P | 0.200 | 0.295  |
| GRA  | 2006 | 153 | 7 | 42 | 54.163 | P | 0.200 | 0.077  |
| M04C | 2006 | 153 | 7 | 42 | 54.177 | P | 0.200 | 0.315  |
| SN28 | 2006 | 153 | 7 | 42 | 54.210 | P | 0.200 | 0.085  |
| DBO  | 2006 | 153 | 7 | 42 | 54.257 | P | 0.200 | 0.346  |
| SHO  | 2006 | 153 | 7 | 42 | 54.289 | P | 0.200 | -0.486 |
| TUQ  | 2006 | 153 | 7 | 42 | 54.621 | P | 0.200 | -0.193 |
| M05C | 2006 | 153 | 7 | 42 | 54.858 | P | 0.200 | 0.083  |
| L04A | 2006 | 153 | 7 | 42 | 55.139 | P | 0.200 | 0.172  |
| O06A | 2006 | 153 | 7 | 42 | 55.205 | P | 0.200 | -0.053 |
| R08A | 2006 | 153 | 7 | 42 | 55.329 | P | 0.200 | -0.202 |
| MNV  | 2006 | 153 | 7 | 42 | 55.418 | P | 0.200 | -0.145 |
| J03A | 2006 | 153 | 7 | 42 | 56.059 | P | 0.200 | 0.783  |
| S09A | 2006 | 153 | 7 | 42 | 56.192 | P | 0.200 | -0.510 |
| P07A | 2006 | 153 | 7 | 42 | 56.412 | P | 0.200 | -0.024 |
| M06C | 2006 | 153 | 7 | 42 | 56.466 | P | 0.200 | 0.148  |
| I03A | 2006 | 153 | 7 | 42 | 56.622 | P | 0.200 | 0.173  |
| K04A | 2006 | 153 | 7 | 42 | 56.964 | P | 0.200 | 0.142  |
| Q08A | 2006 | 153 | 7 | 42 | 57.209 | P | 0.200 | -0.378 |
| TPH  | 2006 | 153 | 7 | 42 | 57.435 | P | 0.200 | -0.281 |
| TPNV | 2006 | 153 | 7 | 42 | 57.674 | P | 0.200 | -0.142 |
| O07A | 2006 | 153 | 7 | 42 | 57.907 | P | 0.200 | -0.386 |
| P08A | 2006 | 153 | 7 | 42 | 59.514 | P | 0.200 | 0.002  |
| N07B | 2006 | 153 | 7 | 42 | 59.560 | P | 0.200 | -0.084 |
| Q09A | 2006 | 153 | 7 | 42 | 59.695 | P | 0.200 | -0.164 |
| O08A | 2006 | 153 | 7 | 43 | 0.826  | P | 0.200 | -0.073 |
| M07A | 2006 | 153 | 7 | 43 | 1.017  | P | 0.200 | 0.124  |
| P09A | 2006 | 153 | 7 | 43 | 1.730  | P | 0.200 | -0.251 |

|      |      |     |   |    |       |   |       |        |
|------|------|-----|---|----|-------|---|-------|--------|
| N08A | 2006 | 153 | 7 | 43 | 2.136 | P | 0.200 | -0.125 |
| O09A | 2006 | 153 | 7 | 43 | 3.440 | P | 0.200 | -0.063 |

|      |     |   |    |         |           |            |          |     |        |
|------|-----|---|----|---------|-----------|------------|----------|-----|--------|
| 2006 | 178 | 2 | 59 | 16.4039 | -19.86500 | -178.28700 | 569.9000 | 143 | -0.006 |
|------|-----|---|----|---------|-----------|------------|----------|-----|--------|

|      |      |     |   |    |        |   |       |        |
|------|------|-----|---|----|--------|---|-------|--------|
| SNCC | 2006 | 178 | 3 | 10 | 11.567 | P | 0.200 | 0.168  |
| SDP  | 2006 | 178 | 3 | 10 | 11.995 | P | 0.200 | 0.081  |
| FARB | 2006 | 178 | 3 | 10 | 12.738 | P | 0.200 | -0.066 |
| SCZ2 | 2006 | 178 | 3 | 10 | 13.145 | P | 0.200 | -0.008 |
| BNLO | 2006 | 178 | 3 | 10 | 13.856 | P | 0.200 | -0.113 |
| HAST | 2006 | 178 | 3 | 10 | 13.919 | P | 0.200 | 0.233  |
| V04C | 2006 | 178 | 3 | 10 | 13.931 | P | 0.200 | 0.114  |
| V03C | 2006 | 178 | 3 | 10 | 14.056 | P | 0.200 | 0.480  |
| PHL  | 2006 | 178 | 3 | 10 | 14.218 | P | 0.200 | -0.042 |
| SBC  | 2006 | 178 | 3 | 10 | 14.419 | P | 0.200 | 0.115  |
| JRSC | 2006 | 178 | 3 | 10 | 14.513 | P | 0.200 | 0.024  |
| MCCM | 2006 | 178 | 3 | 10 | 14.562 | P | 0.200 | -0.108 |
| SAO  | 2006 | 178 | 3 | 10 | 15.277 | P | 0.200 | -0.106 |
| LGU  | 2006 | 178 | 3 | 10 | 15.277 | P | 0.200 | -0.452 |
| CIA  | 2006 | 178 | 3 | 10 | 15.617 | P | 0.200 | -0.511 |
| PKD  | 2006 | 178 | 3 | 10 | 15.909 | P | 0.200 | 0.069  |
| BRK  | 2006 | 178 | 3 | 10 | 15.956 | P | 0.200 | 0.002  |
| BKS  | 2006 | 178 | 3 | 10 | 16.201 | P | 0.200 | 0.064  |
| SMM  | 2006 | 178 | 3 | 10 | 16.240 | P | 0.200 | 0.187  |
| CVS  | 2006 | 178 | 3 | 10 | 16.522 | P | 0.200 | -0.451 |
| BRIB | 2006 | 178 | 3 | 10 | 16.670 | P | 0.200 | 0.243  |
| MHC  | 2006 | 178 | 3 | 10 | 16.745 | P | 0.200 | 0.057  |
| U04C | 2006 | 178 | 3 | 10 | 16.918 | P | 0.200 | 0.563  |
| HOPS | 2006 | 178 | 3 | 10 | 16.959 | P | 0.200 | 0.069  |
| PACP | 2006 | 178 | 3 | 10 | 17.003 | P | 0.200 | 0.274  |
| WENL | 2006 | 178 | 3 | 10 | 17.101 | P | 0.200 | 0.263  |
| FMP  | 2006 | 178 | 3 | 10 | 17.133 | P | 0.200 | -0.217 |
| DJJ  | 2006 | 178 | 3 | 10 | 17.458 | P | 0.200 | -0.400 |
| BDM  | 2006 | 178 | 3 | 10 | 17.745 | P | 0.200 | 0.242  |
| P01C | 2006 | 178 | 3 | 10 | 17.759 | P | 0.200 | 0.131  |
| S04C | 2006 | 178 | 3 | 10 | 18.134 | P | 0.200 | 0.073  |
| DEC  | 2006 | 178 | 3 | 10 | 18.188 | P | 0.200 | -0.574 |
| OSI  | 2006 | 178 | 3 | 10 | 18.544 | P | 0.200 | -0.072 |
| PAS  | 2006 | 178 | 3 | 10 | 18.571 | P | 0.200 | -0.454 |
| V05C | 2006 | 178 | 3 | 10 | 18.618 | P | 0.200 | 0.702  |
| O01C | 2006 | 178 | 3 | 10 | 18.634 | P | 0.200 | 0.398  |
| T05C | 2006 | 178 | 3 | 10 | 18.910 | P | 0.200 | 0.456  |
| U05C | 2006 | 178 | 3 | 10 | 18.945 | P | 0.200 | 0.427  |
| MNRC | 2006 | 178 | 3 | 10 | 19.049 | P | 0.200 | 0.354  |
| ARV  | 2006 | 178 | 3 | 10 | 19.291 | P | 0.200 | -0.161 |
| MWC  | 2006 | 178 | 3 | 10 | 19.504 | P | 0.200 | -0.478 |
| CHF  | 2006 | 178 | 3 | 10 | 19.795 | P | 0.200 | -0.473 |
| Q03C | 2006 | 178 | 3 | 10 | 20.071 | P | 0.200 | 0.936  |
| JCC  | 2006 | 178 | 3 | 10 | 20.076 | P | 0.200 | 0.256  |
| VES  | 2006 | 178 | 3 | 10 | 20.225 | P | 0.200 | -0.396 |
| S05C | 2006 | 178 | 3 | 10 | 20.586 | P | 0.200 | -0.415 |
| BFS  | 2006 | 178 | 3 | 10 | 20.957 | P | 0.200 | -0.341 |
| SN71 | 2006 | 178 | 3 | 10 | 20.996 | P | 0.200 | -0.467 |
| R04C | 2006 | 178 | 3 | 10 | 21.064 | P | 0.200 | -0.524 |
| GASB | 2006 | 178 | 3 | 10 | 21.221 | P | 0.200 | 0.921  |
| SUTB | 2006 | 178 | 3 | 10 | 21.368 | P | 0.200 | -0.615 |
| Q04C | 2006 | 178 | 3 | 10 | 21.676 | P | 0.200 | -0.209 |
| SN51 | 2006 | 178 | 3 | 10 | 21.677 | P | 0.200 | 0.149  |
| SN21 | 2006 | 178 | 3 | 10 | 21.731 | P | 0.200 | -0.456 |
| EDW2 | 2006 | 178 | 3 | 10 | 21.816 | P | 0.200 | -0.036 |
| T06C | 2006 | 178 | 3 | 10 | 21.823 | P | 0.200 | -0.320 |
| SN11 | 2006 | 178 | 3 | 10 | 22.011 | P | 0.200 | -0.377 |
| O02C | 2006 | 178 | 3 | 10 | 22.330 | P | 0.200 | 0.532  |
| SN52 | 2006 | 178 | 3 | 10 | 22.331 | P | 0.200 | -0.459 |

|      |      |     |   |    |        |   |       |        |
|------|------|-----|---|----|--------|---|-------|--------|
| N02C | 2006 | 178 | 3 | 10 | 22.349 | P | 0.200 | 0.206  |
| ISA  | 2006 | 178 | 3 | 10 | 22.552 | P | 0.200 | 0.110  |
| CMB  | 2006 | 178 | 3 | 10 | 22.564 | P | 0.200 | -0.306 |
| SN73 | 2006 | 178 | 3 | 10 | 23.040 | P | 0.200 | -0.201 |
| O03C | 2006 | 178 | 3 | 10 | 23.364 | P | 0.200 | -0.017 |
| M01C | 2006 | 178 | 3 | 10 | 23.410 | P | 0.200 | 0.586  |
| SN84 | 2006 | 178 | 3 | 10 | 23.541 | P | 0.200 | -0.746 |
| ORV  | 2006 | 178 | 3 | 10 | 23.573 | P | 0.200 | -0.284 |
| LAVA | 2006 | 178 | 3 | 10 | 23.814 | P | 0.200 | -0.057 |
| WDC  | 2006 | 178 | 3 | 10 | 23.861 | P | 0.200 | 0.103  |
| S06C | 2006 | 178 | 3 | 10 | 24.054 | P | 0.200 | -0.442 |
| SN43 | 2006 | 178 | 3 | 10 | 24.119 | P | 0.200 | -0.216 |
| BBR  | 2006 | 178 | 3 | 10 | 24.210 | P | 0.200 | -0.084 |
| SN23 | 2006 | 178 | 3 | 10 | 24.272 | P | 0.200 | -0.228 |
| LRL  | 2006 | 178 | 3 | 10 | 24.821 | P | 0.200 | 0.050  |
| SN85 | 2006 | 178 | 3 | 10 | 24.927 | P | 0.200 | -0.394 |
| SN64 | 2006 | 178 | 3 | 10 | 24.934 | P | 0.200 | -0.219 |
| SN54 | 2006 | 178 | 3 | 10 | 24.947 | P | 0.200 | -0.244 |
| SN44 | 2006 | 178 | 3 | 10 | 25.130 | P | 0.200 | -0.060 |
| RRX  | 2006 | 178 | 3 | 10 | 25.282 | P | 0.200 | -0.167 |
| K01A | 2006 | 178 | 3 | 10 | 25.562 | P | 0.200 | 0.654  |
| SN24 | 2006 | 178 | 3 | 10 | 25.666 | P | 0.200 | 0.051  |
| SN34 | 2006 | 178 | 3 | 10 | 25.789 | P | 0.200 | 0.003  |
| M02C | 2006 | 178 | 3 | 10 | 26.050 | P | 0.200 | 0.660  |
| SN55 | 2006 | 178 | 3 | 10 | 26.086 | P | 0.200 | -0.318 |
| L02A | 2006 | 178 | 3 | 10 | 26.099 | P | 0.200 | 0.498  |
| CWC  | 2006 | 178 | 3 | 10 | 26.114 | P | 0.200 | -0.268 |
| R05C | 2006 | 178 | 3 | 10 | 26.144 | P | 0.200 | -0.091 |
| P05C | 2006 | 178 | 3 | 10 | 26.235 | P | 0.200 | 0.126  |
| SN76 | 2006 | 178 | 3 | 10 | 26.875 | P | 0.200 | -0.280 |
| SN25 | 2006 | 178 | 3 | 10 | 26.915 | P | 0.200 | -0.031 |
| SN66 | 2006 | 178 | 3 | 10 | 27.006 | P | 0.200 | -0.169 |
| SN56 | 2006 | 178 | 3 | 10 | 27.116 | P | 0.200 | -0.063 |
| O05C | 2006 | 178 | 3 | 10 | 27.118 | P | 0.200 | 0.160  |
| SN15 | 2006 | 178 | 3 | 10 | 27.133 | P | 0.200 | 0.189  |
| MPM  | 2006 | 178 | 3 | 10 | 27.271 | P | 0.200 | 0.070  |
| GSC  | 2006 | 178 | 3 | 10 | 27.275 | P | 0.200 | -0.134 |
| M03C | 2006 | 178 | 3 | 10 | 27.332 | P | 0.200 | -0.124 |
| YBH  | 2006 | 178 | 3 | 10 | 27.381 | P | 0.200 | 0.449  |
| TIN  | 2006 | 178 | 3 | 10 | 27.439 | P | 0.200 | -0.055 |
| HEC  | 2006 | 178 | 3 | 10 | 27.477 | P | 0.200 | -0.224 |
| O04C | 2006 | 178 | 3 | 10 | 27.739 | P | 0.200 | 0.104  |
| R06C | 2006 | 178 | 3 | 10 | 27.867 | P | 0.200 | 0.236  |
| R07C | 2006 | 178 | 3 | 10 | 27.869 | P | 0.200 | 0.037  |
| SN67 | 2006 | 178 | 3 | 10 | 28.058 | P | 0.200 | 0.085  |
| SN36 | 2006 | 178 | 3 | 10 | 28.065 | P | 0.200 | 0.068  |
| HATC | 2006 | 178 | 3 | 10 | 28.099 | P | 0.200 | 0.002  |
| K02A | 2006 | 178 | 3 | 10 | 28.173 | P | 0.200 | 0.373  |
| SN57 | 2006 | 178 | 3 | 10 | 28.299 | P | 0.200 | 0.131  |
| SN16 | 2006 | 178 | 3 | 10 | 28.467 | P | 0.200 | 0.071  |
| SN47 | 2006 | 178 | 3 | 10 | 28.612 | P | 0.200 | 0.013  |
| BEK  | 2006 | 178 | 3 | 10 | 28.617 | P | 0.200 | -0.136 |
| SN37 | 2006 | 178 | 3 | 10 | 28.799 | P | 0.200 | 0.061  |
| WCN  | 2006 | 178 | 3 | 10 | 29.153 | P | 0.200 | 0.226  |
| S08C | 2006 | 178 | 3 | 10 | 29.438 | P | 0.200 | 0.309  |
| HUMO | 2006 | 178 | 3 | 10 | 29.443 | P | 0.200 | 0.435  |
| SN48 | 2006 | 178 | 3 | 10 | 29.540 | P | 0.200 | -0.169 |
| P06A | 2006 | 178 | 3 | 10 | 29.727 | P | 0.200 | 0.107  |
| J02A | 2006 | 178 | 3 | 10 | 29.765 | P | 0.200 | 0.299  |
| SN38 | 2006 | 178 | 3 | 10 | 29.933 | P | 0.200 | -0.046 |
| M04C | 2006 | 178 | 3 | 10 | 30.001 | P | 0.200 | 0.221  |
| DBO  | 2006 | 178 | 3 | 10 | 30.038 | P | 0.200 | 0.252  |
| ELFS | 2006 | 178 | 3 | 10 | 30.040 | P | 0.200 | 0.305  |

|      |      |     |   |    |        |   |       |        |
|------|------|-----|---|----|--------|---|-------|--------|
| FUR  | 2006 | 178 | 3 | 10 | 30.265 | P | 0.200 | 0.035  |
| GRA  | 2006 | 178 | 3 | 10 | 30.382 | P | 0.200 | 0.182  |
| SN28 | 2006 | 178 | 3 | 10 | 30.388 | P | 0.200 | 0.192  |
| SHO  | 2006 | 178 | 3 | 10 | 30.623 | P | 0.200 | -0.335 |
| M05C | 2006 | 178 | 3 | 10 | 30.715 | P | 0.200 | -0.011 |
| TUQ  | 2006 | 178 | 3 | 10 | 30.826 | P | 0.200 | -0.188 |
| L04A | 2006 | 178 | 3 | 10 | 30.973 | P | 0.200 | 0.079  |
| O06A | 2006 | 178 | 3 | 10 | 31.217 | P | 0.200 | -0.054 |
| R08A | 2006 | 178 | 3 | 10 | 31.469 | P | 0.200 | -0.147 |
| MNV  | 2006 | 178 | 3 | 10 | 31.557 | P | 0.200 | -0.088 |
| J03A | 2006 | 178 | 3 | 10 | 31.866 | P | 0.200 | 0.689  |
| I03A | 2006 | 178 | 3 | 10 | 32.431 | P | 0.200 | 0.081  |
| M06C | 2006 | 178 | 3 | 10 | 32.462 | P | 0.200 | 0.146  |
| S09A | 2006 | 178 | 3 | 10 | 32.483 | P | 0.200 | -0.356 |
| P07A | 2006 | 178 | 3 | 10 | 32.623 | P | 0.200 | 0.134  |
| K04A | 2006 | 178 | 3 | 10 | 32.821 | P | 0.200 | 0.044  |
| Q08A | 2006 | 178 | 3 | 10 | 33.371 | P | 0.200 | -0.320 |
| V11A | 2006 | 178 | 3 | 10 | 33.764 | P | 0.200 | -0.009 |
| TPNV | 2006 | 178 | 3 | 10 | 34.023 | P | 0.200 | 0.010  |
| O07A | 2006 | 178 | 3 | 10 | 34.033 | P | 0.200 | -0.333 |
| L05A | 2006 | 178 | 3 | 10 | 34.180 | P | 0.200 | 0.243  |
| R09A | 2006 | 178 | 3 | 10 | 34.699 | P | 0.200 | -0.196 |
| U11A | 2006 | 178 | 3 | 10 | 35.512 | P | 0.200 | -0.038 |
| N07B | 2006 | 178 | 3 | 10 | 35.693 | P | 0.200 | -0.030 |
| P08A | 2006 | 178 | 3 | 10 | 35.732 | P | 0.200 | 0.109  |
| Q09A | 2006 | 178 | 3 | 10 | 35.907 | P | 0.200 | -0.110 |
| O08A | 2006 | 178 | 3 | 10 | 37.000 | P | 0.200 | -0.017 |
| M07A | 2006 | 178 | 3 | 10 | 37.051 | P | 0.200 | 0.074  |
| P09A | 2006 | 178 | 3 | 10 | 37.907 | P | 0.200 | -0.244 |
| N08A | 2006 | 178 | 3 | 10 | 38.371 | P | 0.200 | -0.018 |
| L07A | 2006 | 178 | 3 | 10 | 38.630 | P | 0.200 | 0.323  |
| O09A | 2006 | 178 | 3 | 10 | 39.623 | P | 0.200 | -0.058 |
| P10A | 2006 | 178 | 3 | 10 | 40.423 | P | 0.200 | -0.276 |
| Q11A | 2006 | 178 | 3 | 10 | 40.943 | P | 0.200 | -0.269 |

|      |      |     |    |         |           |            |         |        |       |
|------|------|-----|----|---------|-----------|------------|---------|--------|-------|
| 2006 | 188  | 7   | 26 | 11.5510 | -15.24400 | -173.61000 | 35.0000 | 146    | 0.001 |
| SNCC | 2006 | 188 | 7  | 37      | 23.943    | P          | 0.200   | 0.270  |       |
| SDP  | 2006 | 188 | 7  | 37      | 24.148    | P          | 0.200   | -0.053 |       |
| FARB | 2006 | 188 | 7  | 37      | 25.249    | P          | 0.200   | -0.065 |       |
| SCZ2 | 2006 | 188 | 7  | 37      | 25.636    | P          | 0.200   | -0.019 |       |
| V04C | 2006 | 188 | 7  | 37      | 26.432    | P          | 0.200   | 0.063  |       |
| BNLO | 2006 | 188 | 7  | 37      | 26.561    | P          | 0.200   | -0.021 |       |
| HAST | 2006 | 188 | 7  | 37      | 26.577    | P          | 0.200   | 0.330  |       |
| V03C | 2006 | 188 | 7  | 37      | 26.701    | P          | 0.200   | 0.566  |       |
| PHL  | 2006 | 188 | 7  | 37      | 26.924    | P          | 0.200   | 0.053  |       |
| SBC  | 2006 | 188 | 7  | 37      | 27.085    | P          | 0.200   | 0.170  |       |
| JRSC | 2006 | 188 | 7  | 37      | 27.157    | P          | 0.200   | -0.035 |       |
| MCCM | 2006 | 188 | 7  | 37      | 27.268    | P          | 0.200   | -0.177 |       |
| SAO  | 2006 | 188 | 7  | 37      | 28.132    | P          | 0.200   | -0.006 |       |
| LGU  | 2006 | 188 | 7  | 37      | 28.225    | P          | 0.200   | -0.308 |       |
| CIA  | 2006 | 188 | 7  | 37      | 28.528    | P          | 0.200   | -0.464 |       |
| MPP  | 2006 | 188 | 7  | 37      | 28.572    | P          | 0.200   | 0.345  |       |
| PKD  | 2006 | 188 | 7  | 37      | 28.776    | P          | 0.200   | 0.101  |       |
| BRK  | 2006 | 188 | 7  | 37      | 28.842    | P          | 0.200   | -0.003 |       |
| SMM  | 2006 | 188 | 7  | 37      | 29.106    | P          | 0.200   | 0.227  |       |
| BKS  | 2006 | 188 | 7  | 37      | 29.198    | P          | 0.200   | 0.168  |       |
| CVS  | 2006 | 188 | 7  | 37      | 29.583    | P          | 0.200   | -0.388 |       |
| BRIB | 2006 | 188 | 7  | 37      | 29.720    | P          | 0.200   | 0.327  |       |
| MHC  | 2006 | 188 | 7  | 37      | 29.758    | P          | 0.200   | 0.162  |       |
| U04C | 2006 | 188 | 7  | 37      | 29.795    | P          | 0.200   | 0.544  |       |
| RPV  | 2006 | 188 | 7  | 37      | 29.901    | P          | 0.200   | -0.221 |       |
| PACP | 2006 | 188 | 7  | 37      | 29.926    | P          | 0.200   | 0.263  |       |
| HOPS | 2006 | 188 | 7  | 37      | 29.967    | P          | 0.200   | 0.021  |       |



|      |      |     |   |    |        |   |       |        |
|------|------|-----|---|----|--------|---|-------|--------|
| WENL | 2006 | 188 | 7 | 37 | 30.235 | P | 0.200 | 0.400  |
| FMP  | 2006 | 188 | 7 | 37 | 30.258 | P | 0.200 | -0.126 |
| DJJ  | 2006 | 188 | 7 | 37 | 30.693 | P | 0.200 | -0.268 |
| P01C | 2006 | 188 | 7 | 37 | 30.881 | P | 0.200 | 0.088  |
| BDM  | 2006 | 188 | 7 | 37 | 31.126 | P | 0.200 | 0.537  |
| S04C | 2006 | 188 | 7 | 37 | 31.347 | P | 0.200 | 0.187  |
| DEC  | 2006 | 188 | 7 | 37 | 31.481 | P | 0.200 | -0.485 |
| OSI  | 2006 | 188 | 7 | 37 | 31.583 | P | 0.200 | -0.155 |
| V05C | 2006 | 188 | 7 | 37 | 31.637 | P | 0.200 | 0.645  |
| O01C | 2006 | 188 | 7 | 37 | 31.936 | P | 0.200 | 0.408  |
| PAS  | 2006 | 188 | 7 | 37 | 31.955 | P | 0.200 | -0.310 |
| U05C | 2006 | 188 | 7 | 37 | 32.000 | P | 0.200 | 0.317  |
| T05C | 2006 | 188 | 7 | 37 | 32.148 | P | 0.200 | 0.568  |
| MNRC | 2006 | 188 | 7 | 37 | 32.351 | P | 0.200 | 0.420  |
| ARV  | 2006 | 188 | 7 | 37 | 32.567 | P | 0.200 | -0.179 |
| MWC  | 2006 | 188 | 7 | 37 | 32.768 | P | 0.200 | -0.534 |
| CHF  | 2006 | 188 | 7 | 37 | 33.212 | P | 0.200 | -0.447 |
| Q03C | 2006 | 188 | 7 | 37 | 33.334 | P | 0.200 | 0.886  |
| VES  | 2006 | 188 | 7 | 37 | 33.599 | P | 0.200 | -0.456 |
| JCC  | 2006 | 188 | 7 | 37 | 33.721 | P | 0.200 | 0.372  |
| S05C | 2006 | 188 | 7 | 37 | 34.102 | P | 0.200 | -0.362 |
| RCT  | 2006 | 188 | 7 | 37 | 34.391 | P | 0.200 | -0.709 |
| BFS  | 2006 | 188 | 7 | 37 | 34.415 | P | 0.200 | -0.407 |
| GASB | 2006 | 188 | 7 | 37 | 34.563 | P | 0.200 | 0.772  |
| SN71 | 2006 | 188 | 7 | 37 | 34.602 | P | 0.200 | -0.431 |
| R04C | 2006 | 188 | 7 | 37 | 34.802 | P | 0.200 | -0.389 |
| SUTB | 2006 | 188 | 7 | 37 | 34.982 | P | 0.200 | -0.646 |
| SN51 | 2006 | 188 | 7 | 37 | 35.171 | P | 0.200 | 0.086  |
| Q04C | 2006 | 188 | 7 | 37 | 35.333 | P | 0.200 | -0.219 |
| EDW2 | 2006 | 188 | 7 | 37 | 35.339 | P | 0.200 | -0.112 |
| SN21 | 2006 | 188 | 7 | 37 | 35.341 | P | 0.200 | -0.464 |
| T06C | 2006 | 188 | 7 | 37 | 35.420 | P | 0.200 | -0.310 |
| SN11 | 2006 | 188 | 7 | 37 | 35.611 | P | 0.200 | -0.450 |
| O02C | 2006 | 188 | 7 | 37 | 36.032 | P | 0.200 | 0.540  |
| N02C | 2006 | 188 | 7 | 37 | 36.108 | P | 0.200 | 0.155  |
| ISA  | 2006 | 188 | 7 | 37 | 36.136 | P | 0.200 | 0.042  |
| SN52 | 2006 | 188 | 7 | 37 | 36.166 | P | 0.200 | -0.315 |
| CMB  | 2006 | 188 | 7 | 37 | 36.487 | P | 0.200 | -0.116 |
| ADO  | 2006 | 188 | 7 | 37 | 36.647 | P | 0.200 | -0.204 |
| SN73 | 2006 | 188 | 7 | 37 | 36.792 | P | 0.200 | -0.212 |
| SN22 | 2006 | 188 | 7 | 37 | 36.882 | P | 0.200 | -0.367 |
| HELL | 2006 | 188 | 7 | 37 | 36.924 | P | 0.200 | -0.491 |
| O03C | 2006 | 188 | 7 | 37 | 37.221 | P | 0.200 | -0.076 |
| M01C | 2006 | 188 | 7 | 37 | 37.367 | P | 0.200 | 0.533  |
| SN84 | 2006 | 188 | 7 | 37 | 37.464 | P | 0.200 | -0.700 |
| ORV  | 2006 | 188 | 7 | 37 | 37.540 | P | 0.200 | -0.219 |
| LAVA | 2006 | 188 | 7 | 37 | 37.592 | P | 0.200 | -0.164 |
| WDC  | 2006 | 188 | 7 | 37 | 37.790 | P | 0.200 | 0.063  |
| S06C | 2006 | 188 | 7 | 37 | 37.940 | P | 0.200 | -0.433 |
| BBR  | 2006 | 188 | 7 | 37 | 37.978 | P | 0.200 | -0.191 |
| SN43 | 2006 | 188 | 7 | 37 | 38.023 | P | 0.200 | -0.173 |
| SN23 | 2006 | 188 | 7 | 37 | 38.179 | P | 0.200 | -0.164 |
| LRL  | 2006 | 188 | 7 | 37 | 38.702 | P | 0.200 | -0.020 |
| SN64 | 2006 | 188 | 7 | 37 | 38.949 | P | 0.200 | -0.173 |
| SN85 | 2006 | 188 | 7 | 37 | 38.983 | P | 0.200 | -0.356 |
| SN54 | 2006 | 188 | 7 | 37 | 39.017 | P | 0.200 | -0.149 |
| RRX  | 2006 | 188 | 7 | 37 | 39.071 | P | 0.200 | -0.436 |
| SN44 | 2006 | 188 | 7 | 37 | 39.156 | P | 0.200 | -0.022 |
| SN24 | 2006 | 188 | 7 | 37 | 39.689 | P | 0.200 | 0.035  |
| SN34 | 2006 | 188 | 7 | 37 | 39.815 | P | 0.200 | 0.008  |
| K01A | 2006 | 188 | 7 | 37 | 39.821 | P | 0.200 | 0.553  |
| R05C | 2006 | 188 | 7 | 37 | 40.171 | P | 0.200 | -0.196 |
| M02C | 2006 | 188 | 7 | 37 | 40.238 | P | 0.200 | 0.604  |

|      |      |     |   |    |        |   |       |        |
|------|------|-----|---|----|--------|---|-------|--------|
| L02A | 2006 | 188 | 7 | 37 | 40.285 | P | 0.200 | 0.373  |
| SN55 | 2006 | 188 | 7 | 37 | 40.289 | P | 0.200 | -0.209 |
| CWC  | 2006 | 188 | 7 | 37 | 40.362 | P | 0.200 | -0.112 |
| SN76 | 2006 | 188 | 7 | 37 | 41.096 | P | 0.200 | -0.272 |
| SN25 | 2006 | 188 | 7 | 37 | 41.134 | P | 0.200 | 0.019  |
| SN15 | 2006 | 188 | 7 | 37 | 41.317 | P | 0.200 | 0.180  |
| SN66 | 2006 | 188 | 7 | 37 | 41.326 | P | 0.200 | -0.068 |
| SN56 | 2006 | 188 | 7 | 37 | 41.327 | P | 0.200 | -0.058 |
| O05C | 2006 | 188 | 7 | 37 | 41.441 | P | 0.200 | 0.158  |
| GSC  | 2006 | 188 | 7 | 37 | 41.501 | P | 0.200 | -0.182 |
| MPM  | 2006 | 188 | 7 | 37 | 41.547 | P | 0.200 | 0.114  |
| HEC  | 2006 | 188 | 7 | 37 | 41.664 | P | 0.200 | -0.387 |
| M03C | 2006 | 188 | 7 | 37 | 41.682 | P | 0.200 | -0.208 |
| TIN  | 2006 | 188 | 7 | 37 | 41.750 | P | 0.200 | 0.003  |
| YBH  | 2006 | 188 | 7 | 37 | 41.830 | P | 0.200 | 0.449  |
| O04C | 2006 | 188 | 7 | 37 | 42.053 | P | 0.200 | 0.005  |
| R07C | 2006 | 188 | 7 | 37 | 42.077 | P | 0.200 | -0.050 |
| R06C | 2006 | 188 | 7 | 37 | 42.078 | P | 0.200 | 0.128  |
| SN67 | 2006 | 188 | 7 | 37 | 42.300 | P | 0.200 | -0.024 |
| SN36 | 2006 | 188 | 7 | 37 | 42.485 | P | 0.200 | 0.161  |
| HATC | 2006 | 188 | 7 | 37 | 42.489 | P | 0.200 | -0.081 |
| SN57 | 2006 | 188 | 7 | 37 | 42.563 | P | 0.200 | 0.023  |
| SN26 | 2006 | 188 | 7 | 37 | 42.623 | P | 0.200 | 0.175  |
| K02A | 2006 | 188 | 7 | 37 | 42.791 | P | 0.200 | 0.324  |
| SN16 | 2006 | 188 | 7 | 37 | 42.879 | P | 0.200 | 0.136  |
| SN47 | 2006 | 188 | 7 | 37 | 42.962 | P | 0.200 | -0.020 |
| BEK  | 2006 | 188 | 7 | 37 | 43.069 | P | 0.200 | -0.171 |
| SN37 | 2006 | 188 | 7 | 37 | 43.265 | P | 0.200 | 0.114  |
| WCN  | 2006 | 188 | 7 | 37 | 43.508 | P | 0.200 | 0.067  |
| S08C | 2006 | 188 | 7 | 37 | 43.943 | P | 0.200 | 0.346  |
| SN48 | 2006 | 188 | 7 | 37 | 44.087 | P | 0.200 | -0.161 |
| HUMO | 2006 | 188 | 7 | 37 | 44.168 | P | 0.200 | 0.418  |
| P06A | 2006 | 188 | 7 | 37 | 44.283 | P | 0.200 | 0.066  |
| ELFS | 2006 | 188 | 7 | 37 | 44.572 | P | 0.200 | 0.157  |
| SN38 | 2006 | 188 | 7 | 37 | 44.623 | P | 0.200 | 0.044  |
| J02A | 2006 | 188 | 7 | 37 | 44.645 | P | 0.200 | 0.261  |
| M04C | 2006 | 188 | 7 | 37 | 44.738 | P | 0.200 | 0.173  |
| DBO  | 2006 | 188 | 7 | 37 | 44.859 | P | 0.200 | 0.161  |
| FUR  | 2006 | 188 | 7 | 37 | 44.923 | P | 0.200 | 0.020  |
| GRA  | 2006 | 188 | 7 | 37 | 45.005 | P | 0.200 | 0.169  |
| SHO  | 2006 | 188 | 7 | 37 | 45.302 | P | 0.200 | -0.395 |
| M05C | 2006 | 188 | 7 | 37 | 45.517 | P | 0.200 | -0.052 |
| TUQ  | 2006 | 188 | 7 | 37 | 45.562 | P | 0.200 | -0.203 |
| Q07A | 2006 | 188 | 7 | 37 | 45.669 | P | 0.200 | 0.035  |
| L04A | 2006 | 188 | 7 | 37 | 45.822 | P | 0.200 | -0.022 |
| O06A | 2006 | 188 | 7 | 37 | 46.056 | P | 0.200 | -0.057 |
| R08A | 2006 | 188 | 7 | 37 | 46.330 | P | 0.200 | -0.108 |
| J03A | 2006 | 188 | 7 | 37 | 46.904 | P | 0.200 | 0.586  |
| U10A | 2006 | 188 | 7 | 37 | 47.265 | P | 0.200 | 0.171  |
| M06C | 2006 | 188 | 7 | 37 | 47.447 | P | 0.200 | 0.091  |
| P07A | 2006 | 188 | 7 | 37 | 47.530 | P | 0.200 | 0.087  |
| S09A | 2006 | 188 | 7 | 37 | 47.639 | P | 0.200 | -0.179 |
| I03A | 2006 | 188 | 7 | 37 | 47.806 | P | 0.200 | 0.145  |
| K04A | 2006 | 188 | 7 | 37 | 48.031 | P | 0.200 | 0.044  |
| Q08A | 2006 | 188 | 7 | 37 | 48.557 | P | 0.200 | -0.214 |
| V11A | 2006 | 188 | 7 | 37 | 48.918 | P | 0.200 | 0.018  |
| TPNV | 2006 | 188 | 7 | 37 | 49.233 | P | 0.200 | 0.087  |
| L05A | 2006 | 188 | 7 | 37 | 49.356 | P | 0.200 | 0.155  |
| O07A | 2006 | 188 | 7 | 37 | 49.401 | P | 0.200 | -0.186 |
| R09A | 2006 | 188 | 7 | 37 | 50.015 | P | 0.200 | -0.111 |
| U11A | 2006 | 188 | 7 | 37 | 50.886 | P | 0.200 | -0.003 |
| P08A | 2006 | 188 | 7 | 37 | 50.987 | P | 0.200 | 0.014  |
| Q09A | 2006 | 188 | 7 | 37 | 51.453 | P | 0.200 | 0.026  |

|      |      |     |   |    |        |   |       |        |
|------|------|-----|---|----|--------|---|-------|--------|
| O08A | 2006 | 188 | 7 | 37 | 52.665 | P | 0.200 | 0.070  |
| M07A | 2006 | 188 | 7 | 37 | 52.670 | P | 0.200 | 0.070  |
| R10A | 2006 | 188 | 7 | 37 | 53.365 | P | 0.200 | 0.218  |
| P09A | 2006 | 188 | 7 | 37 | 53.749 | P | 0.200 | -0.109 |
| N08A | 2006 | 188 | 7 | 37 | 54.297 | P | 0.200 | 0.124  |
| L07A | 2006 | 188 | 7 | 37 | 54.456 | P | 0.200 | 0.323  |
| O09A | 2006 | 188 | 7 | 37 | 55.687 | P | 0.200 | 0.076  |
| P10A | 2006 | 188 | 7 | 37 | 56.378 | P | 0.200 | -0.314 |
| Q11A | 2006 | 188 | 7 | 37 | 57.206 | P | 0.200 | -0.057 |

|      |      |     |    |         |           |            |         |        |       |
|------|------|-----|----|---------|-----------|------------|---------|--------|-------|
| 2006 | 271  | 6   | 22 | 10.1389 | -16.59200 | -172.03300 | 28.0000 | 221    | 0.012 |
| SNCC | 2006 | 271 | 6  | 33      | 22.568    | P          | 0.200   | 0.238  |       |
| SCZ2 | 2006 | 271 | 6  | 33      | 24.466    | P          | 0.200   | -0.004 |       |
| RAMR | 2006 | 271 | 6  | 33      | 25.748    | P          | 0.200   | 0.132  |       |
| HAST | 2006 | 271 | 6  | 33      | 25.954    | P          | 0.200   | 0.246  |       |
| SBC  | 2006 | 271 | 6  | 33      | 26.008    | P          | 0.200   | 0.178  |       |
| V03C | 2006 | 271 | 6  | 33      | 26.077    | P          | 0.200   | 0.584  |       |
| PHL  | 2006 | 271 | 6  | 33      | 26.113    | P          | 0.200   | 0.072  |       |
| BNLO | 2006 | 271 | 6  | 33      | 26.290    | P          | 0.200   | 0.041  |       |
| CIA  | 2006 | 271 | 6  | 33      | 26.922    | P          | 0.200   | -0.656 |       |
| JRSC | 2006 | 271 | 6  | 33      | 27.041    | P          | 0.200   | 0.134  |       |
| MCCM | 2006 | 271 | 6  | 33      | 27.304    | P          | 0.200   | -0.063 |       |
| MPP  | 2006 | 271 | 6  | 33      | 27.489    | P          | 0.200   | 0.260  |       |
| SAO  | 2006 | 271 | 6  | 33      | 27.666    | P          | 0.200   | 0.011  |       |
| PKD  | 2006 | 271 | 6  | 33      | 28.064    | P          | 0.200   | 0.118  |       |
| SMM  | 2006 | 271 | 6  | 33      | 28.120    | P          | 0.200   | 0.149  |       |
| TOV  | 2006 | 271 | 6  | 33      | 28.128    | P          | 0.200   | -0.233 |       |
| RPV  | 2006 | 271 | 6  | 33      | 28.509    | P          | 0.200   | -0.259 |       |
| BRK  | 2006 | 271 | 6  | 33      | 28.761    | P          | 0.200   | 0.113  |       |
| FMP  | 2006 | 271 | 6  | 33      | 28.800    | P          | 0.200   | -0.209 |       |
| BKS  | 2006 | 271 | 6  | 33      | 29.065    | P          | 0.200   | 0.238  |       |
| U04C | 2006 | 271 | 6  | 33      | 29.235    | P          | 0.200   | 0.613  |       |
| DJJ  | 2006 | 271 | 6  | 33      | 29.375    | P          | 0.200   | -0.302 |       |
| MHC  | 2006 | 271 | 6  | 33      | 29.465    | P          | 0.200   | 0.226  |       |
| PACP | 2006 | 271 | 6  | 33      | 29.486    | P          | 0.200   | 0.282  |       |
| BRIB | 2006 | 271 | 6  | 33      | 29.535    | P          | 0.200   | 0.350  |       |
| CVS  | 2006 | 271 | 6  | 33      | 29.606    | P          | 0.200   | -0.272 |       |
| WENL | 2006 | 271 | 6  | 33      | 29.954    | P          | 0.200   | 0.422  |       |
| HOPS | 2006 | 271 | 6  | 33      | 30.220    | P          | 0.200   | 0.189  |       |
| DEC  | 2006 | 271 | 6  | 33      | 30.280    | P          | 0.200   | -0.421 |       |
| OSI  | 2006 | 271 | 6  | 33      | 30.338    | P          | 0.200   | -0.237 |       |
| USC  | 2006 | 271 | 6  | 33      | 30.352    | P          | 0.200   | 0.358  |       |
| PAS  | 2006 | 271 | 6  | 33      | 30.617    | P          | 0.200   | -0.354 |       |
| V05C | 2006 | 271 | 6  | 33      | 30.793    | P          | 0.200   | 0.613  |       |
| SDD  | 2006 | 271 | 6  | 33      | 30.973    | P          | 0.200   | 0.033  |       |
| S04C | 2006 | 271 | 6  | 33      | 30.999    | P          | 0.200   | 0.198  |       |
| BDM  | 2006 | 271 | 6  | 33      | 31.015    | P          | 0.200   | 0.655  |       |
| P01C | 2006 | 271 | 6  | 33      | 31.144    | P          | 0.200   | 0.155  |       |
| U05C | 2006 | 271 | 6  | 33      | 31.514    | P          | 0.200   | 0.529  |       |
| MWC  | 2006 | 271 | 6  | 33      | 31.534    | P          | 0.200   | -0.464 |       |
| T05C | 2006 | 271 | 6  | 33      | 31.621    | P          | 0.200   | 0.585  |       |
| ARV  | 2006 | 271 | 6  | 33      | 31.678    | P          | 0.200   | -0.013 |       |
| CHF  | 2006 | 271 | 6  | 33      | 31.996    | P          | 0.200   | -0.379 |       |
| VCS  | 2006 | 271 | 6  | 33      | 32.149    | P          | 0.200   | -0.256 |       |
| MNRC | 2006 | 271 | 6  | 33      | 32.313    | P          | 0.200   | 0.385  |       |
| O01C | 2006 | 271 | 6  | 33      | 32.364    | P          | 0.200   | 0.478  |       |
| VES  | 2006 | 271 | 6  | 33      | 32.718    | P          | 0.200   | -0.437 |       |
| BFS  | 2006 | 271 | 6  | 33      | 33.096    | P          | 0.200   | -0.388 |       |
| Q03C | 2006 | 271 | 6  | 33      | 33.257    | P          | 0.200   | 0.900  |       |
| S05C | 2006 | 271 | 6  | 33      | 33.620    | P          | 0.200   | -0.340 |       |
| RCT  | 2006 | 271 | 6  | 33      | 33.710    | P          | 0.200   | -0.586 |       |
| EDW2 | 2006 | 271 | 6  | 33      | 34.123    | P          | 0.200   | -0.141 |       |
| JCC  | 2006 | 271 | 6  | 33      | 34.233    | P          | 0.200   | 0.384  |       |

|      |      |     |   |    |        |   |       |        |
|------|------|-----|---|----|--------|---|-------|--------|
| R04C | 2006 | 271 | 6 | 33 | 34.643 | P | 0.200 | -0.276 |
| SNB3 | 2006 | 271 | 6 | 33 | 35.676 | P | 0.200 | -0.356 |
| GASB | 2006 | 271 | 6 | 33 | 34.786 | P | 0.200 | 0.840  |
| T06C | 2006 | 271 | 6 | 33 | 34.813 | P | 0.200 | -0.299 |
| SUTB | 2006 | 271 | 6 | 33 | 34.981 | P | 0.200 | -0.627 |
| ISA  | 2006 | 271 | 6 | 33 | 35.211 | P | 0.200 | 0.107  |
| ADO  | 2006 | 271 | 6 | 33 | 35.215 | P | 0.200 | -0.342 |
| SVD  | 2006 | 271 | 6 | 33 | 35.253 | P | 0.200 | -0.108 |
| Q04C | 2006 | 271 | 6 | 33 | 35.321 | P | 0.200 | -0.103 |
| VTV  | 2006 | 271 | 6 | 33 | 35.416 | P | 0.200 | -0.427 |
| SNA3 | 2006 | 271 | 6 | 33 | 36.432 | P | 0.200 | 0.150  |
| SNE4 | 2006 | 271 | 6 | 33 | 36.964 | P | 0.200 | -0.138 |
| SNC4 | 2006 | 271 | 6 | 33 | 37.036 | P | 0.200 | -0.070 |
| SN93 | 2006 | 271 | 6 | 33 | 36.117 | P | 0.200 | 0.348  |
| CMB  | 2006 | 271 | 6 | 33 | 36.181 | P | 0.200 | -0.053 |
| HELL | 2006 | 271 | 6 | 33 | 36.189 | P | 0.200 | -0.476 |
| O02C | 2006 | 271 | 6 | 33 | 36.249 | P | 0.200 | 0.496  |
| SNA4 | 2006 | 271 | 6 | 33 | 37.354 | P | 0.200 | -0.071 |
| SN43 | 2006 | 271 | 6 | 33 | 37.515 | P | 0.200 | -0.109 |
| N02C | 2006 | 271 | 6 | 33 | 36.588 | P | 0.200 | 0.220  |
| BBR  | 2006 | 271 | 6 | 33 | 36.594 | P | 0.200 | -0.173 |
| SND4 | 2006 | 271 | 6 | 33 | 37.001 | P | 0.200 | -0.110 |
| SNG5 | 2006 | 271 | 6 | 33 | 38.037 | P | 0.200 | -0.271 |
| SND5 | 2006 | 271 | 6 | 33 | 38.084 | P | 0.200 | -0.367 |
| SNC5 | 2006 | 271 | 6 | 33 | 38.103 | P | 0.200 | -0.477 |
| SNE5 | 2006 | 271 | 6 | 33 | 38.217 | P | 0.200 | -0.287 |
| SNB5 | 2006 | 271 | 6 | 33 | 38.337 | P | 0.200 | -0.318 |
| O03C | 2006 | 271 | 6 | 33 | 37.376 | P | 0.200 | -0.065 |
| LAVA | 2006 | 271 | 6 | 33 | 37.398 | P | 0.200 | -0.153 |
| S06C | 2006 | 271 | 6 | 33 | 37.452 | P | 0.200 | -0.462 |
| ORV  | 2006 | 271 | 6 | 33 | 37.563 | P | 0.200 | -0.215 |
| LRL  | 2006 | 271 | 6 | 33 | 37.567 | P | 0.200 | -0.047 |
| RRX  | 2006 | 271 | 6 | 33 | 37.760 | P | 0.200 | -0.474 |
| WDC  | 2006 | 271 | 6 | 33 | 38.045 | P | 0.200 | 0.029  |
| M01C | 2006 | 271 | 6 | 33 | 38.151 | P | 0.200 | 0.643  |
| SN55 | 2006 | 271 | 6 | 33 | 39.748 | P | 0.200 | -0.240 |
| SNC6 | 2006 | 271 | 6 | 33 | 39.755 | P | 0.200 | -0.209 |
| SNF6 | 2006 | 271 | 6 | 33 | 39.775 | P | 0.200 | -0.140 |
| SNE6 | 2006 | 271 | 6 | 33 | 39.836 | P | 0.200 | -0.219 |
| SN96 | 2006 | 271 | 6 | 33 | 39.143 | P | 0.200 | -0.278 |
| CWC  | 2006 | 271 | 6 | 33 | 39.491 | P | 0.200 | -0.099 |
| SNB7 | 2006 | 271 | 6 | 33 | 40.780 | P | 0.200 | -0.285 |
| R05C | 2006 | 271 | 6 | 33 | 39.949 | P | 0.200 | -0.136 |
| SNC7 | 2006 | 271 | 6 | 33 | 41.057 | P | 0.200 | -0.015 |
| P05C | 2006 | 271 | 6 | 33 | 40.134 | P | 0.200 | -0.015 |
| HEC  | 2006 | 271 | 6 | 33 | 40.234 | P | 0.200 | -0.470 |
| GSC  | 2006 | 271 | 6 | 33 | 40.251 | P | 0.200 | -0.210 |
| SN97 | 2006 | 271 | 6 | 33 | 41.355 | P | 0.200 | -0.061 |
| SLA  | 2006 | 271 | 6 | 33 | 40.476 | P | 0.200 | -0.220 |
| MPM  | 2006 | 271 | 6 | 33 | 40.500 | P | 0.200 | 0.073  |
| SND7 | 2006 | 271 | 6 | 33 | 41.577 | P | 0.200 | 0.165  |
| K01A | 2006 | 271 | 6 | 33 | 40.692 | P | 0.200 | 0.569  |
| M02C | 2006 | 271 | 6 | 33 | 40.709 | P | 0.200 | 0.616  |
| SNE7 | 2006 | 271 | 6 | 33 | 41.752 | P | 0.200 | 0.082  |
| SNA7 | 2006 | 271 | 6 | 33 | 41.903 | P | 0.200 | 0.064  |
| TIN  | 2006 | 271 | 6 | 33 | 41.004 | P | 0.200 | 0.016  |
| MLAC | 2006 | 271 | 6 | 33 | 41.052 | P | 0.200 | 0.278  |
| L02A | 2006 | 271 | 6 | 33 | 41.108 | P | 0.200 | 0.542  |
| O05C | 2006 | 271 | 6 | 33 | 41.520 | P | 0.200 | 0.211  |
| R07C | 2006 | 271 | 6 | 33 | 41.594 | P | 0.200 | -0.040 |
| R06C | 2006 | 271 | 6 | 33 | 41.611 | P | 0.200 | 0.040  |
| SND8 | 2006 | 271 | 6 | 33 | 42.757 | P | 0.200 | 0.011  |
| M03C | 2006 | 271 | 6 | 33 | 41.954 | P | 0.200 | -0.296 |

|      |      |     |   |    |        |   |       |        |
|------|------|-----|---|----|--------|---|-------|--------|
| O04C | 2006 | 271 | 6 | 33 | 42.059 | P | 0.200 | -0.080 |
| SNA8 | 2006 | 271 | 6 | 33 | 43.119 | P | 0.200 | 0.038  |
| YBH  | 2006 | 271 | 6 | 33 | 42.389 | P | 0.200 | 0.508  |
| HATC | 2006 | 271 | 6 | 33 | 42.566 | P | 0.200 | -0.215 |
| BEK  | 2006 | 271 | 6 | 33 | 42.974 | P | 0.200 | -0.214 |
| S08C | 2006 | 271 | 6 | 33 | 43.221 | P | 0.200 | 0.318  |
| WCN  | 2006 | 271 | 6 | 33 | 43.356 | P | 0.200 | 0.131  |
| K02A | 2006 | 271 | 6 | 33 | 43.596 | P | 0.200 | 0.385  |
| FUR  | 2006 | 271 | 6 | 33 | 43.841 | P | 0.200 | -0.066 |
| P06A | 2006 | 271 | 6 | 33 | 44.059 | P | 0.200 | -0.016 |
| SHO  | 2006 | 271 | 6 | 33 | 44.065 | P | 0.200 | -0.477 |
| GRA  | 2006 | 271 | 6 | 33 | 44.166 | P | 0.200 | 0.184  |
| TUQ  | 2006 | 271 | 6 | 33 | 44.208 | P | 0.200 | -0.290 |
| ELFS | 2006 | 271 | 6 | 33 | 44.590 | P | 0.200 | 0.067  |
| SNF9 | 2006 | 271 | 6 | 33 | 44.782 | P | 0.200 | 0.735  |
| M04C | 2006 | 271 | 6 | 33 | 45.111 | P | 0.200 | 0.130  |
| Q07A | 2006 | 271 | 6 | 33 | 45.210 | P | 0.200 | -0.053 |
| J02A | 2006 | 271 | 6 | 33 | 45.550 | P | 0.200 | 0.322  |
| DBO  | 2006 | 271 | 6 | 33 | 45.691 | P | 0.200 | 0.223  |
| M05C | 2006 | 271 | 6 | 33 | 45.749 | P | 0.200 | -0.091 |
| R08A | 2006 | 271 | 6 | 33 | 45.751 | P | 0.200 | -0.142 |
| O06A | 2006 | 271 | 6 | 33 | 46.007 | P | 0.200 | -0.045 |
| U10A | 2006 | 271 | 6 | 33 | 46.127 | P | 0.200 | 0.093  |
| L04A | 2006 | 271 | 6 | 33 | 46.262 | P | 0.200 | -0.066 |
| S09A | 2006 | 271 | 6 | 33 | 46.866 | P | 0.200 | -0.213 |
| P07A | 2006 | 271 | 6 | 33 | 47.232 | P | 0.200 | 0.046  |
| M06C | 2006 | 271 | 6 | 33 | 47.535 | P | 0.200 | 0.000  |
| V11A | 2006 | 271 | 6 | 33 | 47.645 | P | 0.200 | -0.020 |
| J03A | 2006 | 271 | 6 | 33 | 47.694 | P | 0.200 | 0.594  |
| N06A | 2006 | 271 | 6 | 33 | 48.025 | P | 0.200 | -0.088 |
| TPH  | 2006 | 271 | 6 | 33 | 48.110 | P | 0.200 | -0.181 |
| Q08A | 2006 | 271 | 6 | 33 | 48.149 | P | 0.200 | -0.162 |
| K04A | 2006 | 271 | 6 | 33 | 48.522 | P | 0.200 | 0.001  |
| I03A | 2006 | 271 | 6 | 33 | 48.620 | P | 0.200 | 0.046  |
| O07A | 2006 | 271 | 6 | 33 | 49.206 | P | 0.200 | -0.221 |
| R09A | 2006 | 271 | 6 | 33 | 49.319 | P | 0.200 | -0.144 |
| L05A | 2006 | 271 | 6 | 33 | 49.616 | P | 0.200 | 0.066  |
| U11A | 2006 | 271 | 6 | 33 | 49.666 | P | 0.200 | -0.092 |
| P08A | 2006 | 271 | 6 | 33 | 50.686 | P | 0.200 | 0.025  |
| Q09A | 2006 | 271 | 6 | 33 | 50.820 | P | 0.200 | -0.062 |
| N07B | 2006 | 271 | 6 | 33 | 51.050 | P | 0.200 | -0.074 |
| K05A | 2006 | 271 | 6 | 33 | 51.900 | P | 0.200 | 0.148  |
| R10A | 2006 | 271 | 6 | 33 | 52.457 | P | 0.200 | 0.027  |
| O08A | 2006 | 271 | 6 | 33 | 52.473 | P | 0.200 | 0.085  |
| M07A | 2006 | 271 | 6 | 33 | 52.657 | P | 0.200 | -0.022 |
| J05A | 2006 | 271 | 6 | 33 | 52.795 | P | 0.200 | 0.166  |
| P09A | 2006 | 271 | 6 | 33 | 53.186 | P | 0.200 | -0.244 |
| N08A | 2006 | 271 | 6 | 33 | 54.084 | P | 0.200 | 0.030  |
| L07A | 2006 | 271 | 6 | 33 | 54.511 | P | 0.200 | 0.184  |
| O09A | 2006 | 271 | 6 | 33 | 55.284 | P | 0.200 | -0.013 |
| P10A | 2006 | 271 | 6 | 33 | 55.765 | P | 0.200 | -0.460 |
| BMN  | 2006 | 271 | 6 | 33 | 55.904 | P | 0.200 | -0.197 |
| Q11A | 2006 | 271 | 6 | 33 | 56.439 | P | 0.200 | -0.149 |

|      |      |    |    |         |           |            |         |        |       |
|------|------|----|----|---------|-----------|------------|---------|--------|-------|
| 2007 | 36   | 10 | 16 | 23.0273 | -20.67800 | -175.48700 | 15.0000 | 308    | 0.002 |
| SNCC | 2007 | 36 | 10 | 28      | 8.032     | P          | 0.200   | 0.191  |       |
| SCZ2 | 2007 | 36 | 10 | 28      | 9.926     | P          | 0.200   | 0.064  |       |
| FARB | 2007 | 36 | 10 | 28      | 10.618    | P          | 0.200   | -0.040 |       |
| V04C | 2007 | 36 | 10 | 28      | 11.173    | P          | 0.200   | 0.144  |       |
| SBC  | 2007 | 36 | 10 | 28      | 11.357    | P          | 0.200   | 0.188  |       |
| V03C | 2007 | 36 | 10 | 28      | 11.416    | P          | 0.200   | 0.507  |       |
| HAST | 2007 | 36 | 10 | 28      | 11.445    | P          | 0.200   | 0.313  |       |
| PHL  | 2007 | 36 | 10 | 28      | 11.499    | P          | 0.200   | 0.088  |       |

|      |      |    |    |    |        |   |       |        |
|------|------|----|----|----|--------|---|-------|--------|
| BNLO | 2007 | 36 | 10 | 28 | 11.519 | P | 0.200 | -0.138 |
| LGU  | 2007 | 36 | 10 | 28 | 12.247 | P | 0.200 | -0.285 |
| CIA  | 2007 | 36 | 10 | 28 | 12.287 | P | 0.200 | -0.443 |
| JRSC | 2007 | 36 | 10 | 28 | 12.323 | P | 0.200 | 0.056  |
| MCCM | 2007 | 36 | 10 | 28 | 12.563 | P | 0.200 | -0.138 |
| MPP  | 2007 | 36 | 10 | 28 | 12.830 | P | 0.200 | 0.338  |
| SAO  | 2007 | 36 | 10 | 28 | 12.897 | P | 0.200 | -0.076 |
| TOV  | 2007 | 36 | 10 | 28 | 13.329 | P | 0.200 | -0.158 |
| PKD  | 2007 | 36 | 10 | 28 | 13.338 | P | 0.200 | 0.139  |
| SMM  | 2007 | 36 | 10 | 28 | 13.477 | P | 0.200 | 0.265  |
| BRK  | 2007 | 36 | 10 | 28 | 13.938 | P | 0.200 | 0.029  |
| FMP  | 2007 | 36 | 10 | 28 | 14.027 | P | 0.200 | -0.040 |
| BKS  | 2007 | 36 | 10 | 28 | 14.185 | P | 0.200 | 0.098  |
| DJJ  | 2007 | 36 | 10 | 28 | 14.531 | P | 0.200 | -0.186 |
| U04C | 2007 | 36 | 10 | 28 | 14.533 | P | 0.200 | 0.686  |
| MHC  | 2007 | 36 | 10 | 28 | 14.615 | P | 0.200 | 0.131  |
| CVS  | 2007 | 36 | 10 | 28 | 14.617 | P | 0.200 | -0.473 |
| BRIB | 2007 | 36 | 10 | 28 | 14.675 | P | 0.200 | 0.263  |
| PACP | 2007 | 36 | 10 | 28 | 14.722 | P | 0.200 | 0.296  |
| WENL | 2007 | 36 | 10 | 28 | 15.068 | P | 0.200 | 0.338  |
| HOPS | 2007 | 36 | 10 | 28 | 15.263 | P | 0.200 | 0.046  |
| DEC  | 2007 | 36 | 10 | 28 | 15.274 | P | 0.200 | -0.407 |
| OSI  | 2007 | 36 | 10 | 28 | 15.578 | P | 0.200 | -0.039 |
| PASC | 2007 | 36 | 10 | 28 | 15.658 | P | 0.200 | -0.426 |
| USC  | 2007 | 36 | 10 | 28 | 15.674 | P | 0.200 | 0.678  |
| BDM  | 2007 | 36 | 10 | 28 | 15.828 | P | 0.200 | 0.313  |
| P01C | 2007 | 36 | 10 | 28 | 16.076 | P | 0.200 | -0.046 |
| S04C | 2007 | 36 | 10 | 28 | 16.083 | P | 0.200 | 0.145  |
| V05C | 2007 | 36 | 10 | 28 | 16.114 | P | 0.200 | 0.824  |
| SDD  | 2007 | 36 | 10 | 28 | 16.243 | P | 0.200 | 0.398  |
| ARV  | 2007 | 36 | 10 | 28 | 16.502 | P | 0.200 | -0.153 |
| MWC  | 2007 | 36 | 10 | 28 | 16.555 | P | 0.200 | -0.361 |
| U05C | 2007 | 36 | 10 | 28 | 16.646 | P | 0.200 | 0.592  |
| T05C | 2007 | 36 | 10 | 28 | 16.777 | P | 0.200 | 0.630  |
| CHF  | 2007 | 36 | 10 | 28 | 16.888 | P | 0.200 | -0.370 |
| VCS  | 2007 | 36 | 10 | 28 | 16.991 | P | 0.200 | -0.297 |
| O01C | 2007 | 36 | 10 | 28 | 17.277 | P | 0.200 | 0.323  |
| MNRC | 2007 | 36 | 10 | 28 | 17.290 | P | 0.200 | 0.281  |
| VES  | 2007 | 36 | 10 | 28 | 17.723 | P | 0.200 | -0.330 |
| BFS  | 2007 | 36 | 10 | 28 | 18.049 | P | 0.200 | -0.225 |
| Q03C | 2007 | 36 | 10 | 28 | 18.294 | P | 0.200 | 0.904  |
| S05C | 2007 | 36 | 10 | 28 | 18.489 | P | 0.200 | -0.391 |
| RCT  | 2007 | 36 | 10 | 28 | 18.516 | P | 0.200 | -0.628 |
| JCC  | 2007 | 36 | 10 | 28 | 18.908 | P | 0.200 | 0.132  |
| EDW2 | 2007 | 36 | 10 | 28 | 19.058 | P | 0.200 | 0.024  |
| R04C | 2007 | 36 | 10 | 28 | 19.259 | P | 0.200 | -0.505 |
| T06C | 2007 | 36 | 10 | 28 | 19.646 | P | 0.200 | -0.297 |
| GASB | 2007 | 36 | 10 | 28 | 19.732 | P | 0.200 | 0.846  |
| SUTB | 2007 | 36 | 10 | 28 | 19.819 | P | 0.200 | -0.629 |
| ISA  | 2007 | 36 | 10 | 28 | 20.035 | P | 0.200 | 0.176  |
| SVD  | 2007 | 36 | 10 | 28 | 20.066 | P | 0.200 | 0.056  |
| Q04C | 2007 | 36 | 10 | 28 | 20.107 | P | 0.200 | -0.137 |
| ADO  | 2007 | 36 | 10 | 28 | 20.300 | P | 0.200 | 0.070  |
| SNC3 | 2007 | 36 | 10 | 28 | 20.386 | P | 0.200 | -0.053 |
| SNB3 | 2007 | 36 | 10 | 28 | 20.634 | P | 0.200 | -0.204 |
| HELL | 2007 | 36 | 10 | 28 | 20.860 | P | 0.200 | -0.510 |
| CMB  | 2007 | 36 | 10 | 28 | 20.862 | P | 0.200 | -0.137 |
| SN93 | 2007 | 36 | 10 | 28 | 20.875 | P | 0.200 | 0.320  |
| O02C | 2007 | 36 | 10 | 28 | 20.977 | P | 0.200 | 0.400  |
| N02C | 2007 | 36 | 10 | 28 | 21.208 | P | 0.200 | 0.075  |
| SNA3 | 2007 | 36 | 10 | 28 | 21.214 | P | 0.200 | 0.167  |
| BBR  | 2007 | 36 | 10 | 28 | 21.380 | P | 0.200 | 0.039  |
| SNC4 | 2007 | 36 | 10 | 28 | 21.568 | P | 0.200 | -0.253 |

|      |      |    |    |    |        |   |       |        |
|------|------|----|----|----|--------|---|-------|--------|
| SNE4 | 2007 | 36 | 10 | 28 | 21.598 | P | 0.200 | -0.230 |
| SND4 | 2007 | 36 | 10 | 28 | 21.641 | P | 0.200 | -0.210 |
| SN84 | 2007 | 36 | 10 | 28 | 21.799 | P | 0.200 | -0.679 |
| SN63 | 2007 | 36 | 10 | 28 | 21.887 | P | 0.200 | -0.308 |
| SN12 | 2007 | 36 | 10 | 28 | 21.927 | P | 0.200 | -0.205 |
| SNA4 | 2007 | 36 | 10 | 28 | 21.965 | P | 0.200 | -0.159 |
| O03C | 2007 | 36 | 10 | 28 | 21.980 | P | 0.200 | -0.156 |
| LAVA | 2007 | 36 | 10 | 28 | 22.101 | P | 0.200 | -0.144 |
| ORV  | 2007 | 36 | 10 | 28 | 22.106 | P | 0.200 | -0.368 |
| S06C | 2007 | 36 | 10 | 28 | 22.182 | P | 0.200 | -0.414 |
| SN43 | 2007 | 36 | 10 | 28 | 22.203 | P | 0.200 | -0.100 |
| SN95 | 2007 | 36 | 10 | 28 | 22.242 | P | 0.200 | -0.479 |
| RRX  | 2007 | 36 | 10 | 28 | 22.512 | P | 0.200 | -0.209 |
| SNG5 | 2007 | 36 | 10 | 28 | 22.595 | P | 0.200 | -0.366 |
| SNC5 | 2007 | 36 | 10 | 28 | 22.595 | P | 0.200 | -0.621 |
| SND5 | 2007 | 36 | 10 | 28 | 22.629 | P | 0.200 | -0.459 |
| M01C | 2007 | 36 | 10 | 28 | 22.662 | P | 0.200 | 0.498  |
| WDC  | 2007 | 36 | 10 | 28 | 22.664 | P | 0.200 | -0.022 |
| SNE5 | 2007 | 36 | 10 | 28 | 22.871 | P | 0.200 | -0.292 |
| SNB5 | 2007 | 36 | 10 | 28 | 22.874 | P | 0.200 | -0.413 |
| SN64 | 2007 | 36 | 10 | 28 | 23.119 | P | 0.200 | -0.156 |
| SNA5 | 2007 | 36 | 10 | 28 | 23.153 | P | 0.200 | -0.357 |
| SN85 | 2007 | 36 | 10 | 28 | 23.195 | P | 0.200 | -0.388 |
| SN75 | 2007 | 36 | 10 | 28 | 23.781 | P | 0.200 | -0.372 |
| SN96 | 2007 | 36 | 10 | 28 | 23.790 | P | 0.200 | -0.233 |
| SN34 | 2007 | 36 | 10 | 28 | 23.945 | P | 0.200 | 0.164  |
| CWC  | 2007 | 36 | 10 | 28 | 24.007 | P | 0.200 | -0.104 |
| SN14 | 2007 | 36 | 10 | 28 | 24.015 | P | 0.200 | 0.022  |
| SN65 | 2007 | 36 | 10 | 28 | 24.197 | P | 0.200 | -0.202 |
| SNC6 | 2007 | 36 | 10 | 28 | 24.314 | P | 0.200 | -0.206 |
| SNF6 | 2007 | 36 | 10 | 28 | 24.341 | P | 0.200 | -0.145 |
| SNE6 | 2007 | 36 | 10 | 28 | 24.343 | P | 0.200 | -0.282 |
| SN55 | 2007 | 36 | 10 | 28 | 24.348 | P | 0.200 | -0.195 |
| SNB6 | 2007 | 36 | 10 | 28 | 24.431 | P | 0.200 | -0.087 |
| R05C | 2007 | 36 | 10 | 28 | 24.452 | P | 0.200 | -0.182 |
| HEC  | 2007 | 36 | 10 | 28 | 24.854 | P | 0.200 | -0.164 |
| GSC  | 2007 | 36 | 10 | 28 | 24.875 | P | 0.200 | 0.042  |
| SN86 | 2007 | 36 | 10 | 28 | 24.895 | P | 0.200 | -0.030 |
| K01A | 2007 | 36 | 10 | 28 | 25.049 | P | 0.200 | 0.468  |
| MPM  | 2007 | 36 | 10 | 28 | 25.077 | P | 0.200 | 0.229  |
| M02C | 2007 | 36 | 10 | 28 | 25.081 | P | 0.200 | 0.466  |
| SLA  | 2007 | 36 | 10 | 28 | 25.128 | P | 0.200 | 0.027  |
| SNB7 | 2007 | 36 | 10 | 28 | 25.372 | P | 0.200 | -0.187 |
| L02A | 2007 | 36 | 10 | 28 | 25.428 | P | 0.200 | 0.373  |
| SNG7 | 2007 | 36 | 10 | 28 | 25.460 | P | 0.200 | -0.212 |
| MLAC | 2007 | 36 | 10 | 28 | 25.527 | P | 0.200 | 0.280  |
| TIN  | 2007 | 36 | 10 | 28 | 25.538 | P | 0.200 | 0.116  |
| SNC7 | 2007 | 36 | 10 | 28 | 25.594 | P | 0.200 | 0.036  |
| SN97 | 2007 | 36 | 10 | 28 | 25.868 | P | 0.200 | -0.009 |
| O05C | 2007 | 36 | 10 | 28 | 25.877 | P | 0.200 | 0.116  |
| SND7 | 2007 | 36 | 10 | 28 | 25.985 | P | 0.200 | 0.116  |
| R07C | 2007 | 36 | 10 | 28 | 26.076 | P | 0.200 | 0.007  |
| SNE7 | 2007 | 36 | 10 | 28 | 26.100 | P | 0.200 | -0.020 |
| R06C | 2007 | 36 | 10 | 28 | 26.250 | P | 0.200 | 0.245  |
| SNA7 | 2007 | 36 | 10 | 28 | 26.342 | P | 0.200 | 0.061  |
| M03C | 2007 | 36 | 10 | 28 | 26.401 | P | 0.200 | -0.256 |
| O04C | 2007 | 36 | 10 | 28 | 26.517 | P | 0.200 | -0.028 |
| YBH  | 2007 | 36 | 10 | 28 | 26.590 | P | 0.200 | 0.309  |
| HATC | 2007 | 36 | 10 | 28 | 27.035 | P | 0.200 | -0.125 |
| SNF8 | 2007 | 36 | 10 | 28 | 27.045 | P | 0.200 | -0.168 |
| SND8 | 2007 | 36 | 10 | 28 | 27.126 | P | 0.200 | 0.014  |
| SNC8 | 2007 | 36 | 10 | 28 | 27.328 | P | 0.200 | -0.116 |
| SN98 | 2007 | 36 | 10 | 28 | 27.338 | P | 0.200 | -0.106 |

|      |      |    |    |    |        |   |       |        |
|------|------|----|----|----|--------|---|-------|--------|
| BEK  | 2007 | 36 | 10 | 28 | 27.373 | P | 0.200 | -0.172 |
| SNA8 | 2007 | 36 | 10 | 28 | 27.516 | P | 0.200 | 0.093  |
| S08C | 2007 | 36 | 10 | 28 | 27.649 | P | 0.200 | 0.424  |
| K02A | 2007 | 36 | 10 | 28 | 27.722 | P | 0.200 | 0.237  |
| WCN  | 2007 | 36 | 10 | 28 | 27.743 | P | 0.200 | 0.185  |
| SNF9 | 2007 | 36 | 10 | 28 | 28.115 | P | 0.200 | -0.211 |
| FUR  | 2007 | 36 | 10 | 28 | 28.269 | P | 0.200 | 0.202  |
| P06A | 2007 | 36 | 10 | 28 | 28.443 | P | 0.200 | 0.082  |
| SNB9 | 2007 | 36 | 10 | 28 | 28.484 | P | 0.200 | 0.082  |
| SNE9 | 2007 | 36 | 10 | 28 | 28.518 | P | 0.200 | -0.214 |
| GRA  | 2007 | 36 | 10 | 28 | 28.530 | P | 0.200 | 0.342  |
| SHO  | 2007 | 36 | 10 | 28 | 28.532 | P | 0.200 | -0.116 |
| TUQ  | 2007 | 36 | 10 | 28 | 28.656 | P | 0.200 | 0.075  |
| SND9 | 2007 | 36 | 10 | 28 | 28.725 | P | 0.200 | 0.118  |
| ELFS | 2007 | 36 | 10 | 28 | 28.892 | P | 0.200 | 0.120  |
| HUMO | 2007 | 36 | 10 | 28 | 29.054 | P | 0.200 | 0.414  |
| M04C | 2007 | 36 | 10 | 28 | 29.263 | P | 0.200 | 0.084  |
| J02A | 2007 | 36 | 10 | 28 | 29.574 | P | 0.200 | 0.220  |
| Q07A | 2007 | 36 | 10 | 28 | 29.645 | P | 0.200 | 0.208  |
| DBO  | 2007 | 36 | 10 | 28 | 29.770 | P | 0.200 | 0.176  |
| M05C | 2007 | 36 | 10 | 28 | 29.859 | P | 0.200 | -0.139 |
| R08A | 2007 | 36 | 10 | 28 | 29.935 | P | 0.200 | -0.084 |
| O06A | 2007 | 36 | 10 | 28 | 30.059 | P | 0.200 | -0.138 |
| L04A | 2007 | 36 | 10 | 28 | 30.321 | P | 0.200 | -0.109 |
| U10A | 2007 | 36 | 10 | 28 | 30.565 | P | 0.200 | 0.501  |
| S09A | 2007 | 36 | 10 | 28 | 30.898 | P | 0.200 | -0.195 |
| P07A | 2007 | 36 | 10 | 28 | 31.403 | P | 0.200 | 0.149  |
| M06C | 2007 | 36 | 10 | 28 | 31.584 | P | 0.200 | 0.010  |
| J03A | 2007 | 36 | 10 | 28 | 31.646 | P | 0.200 | 0.551  |
| V11A | 2007 | 36 | 10 | 28 | 31.732 | P | 0.200 | 0.196  |
| N06A | 2007 | 36 | 10 | 28 | 31.989 | P | 0.200 | -0.124 |
| Q08A | 2007 | 36 | 10 | 28 | 32.130 | P | 0.200 | -0.156 |
| TPH  | 2007 | 36 | 10 | 28 | 32.220 | P | 0.200 | -0.013 |
| K04A | 2007 | 36 | 10 | 28 | 32.381 | P | 0.200 | -0.088 |
| I03A | 2007 | 36 | 10 | 28 | 32.462 | P | 0.200 | -0.004 |
| O07A | 2007 | 36 | 10 | 28 | 33.082 | P | 0.200 | -0.260 |
| R09A | 2007 | 36 | 10 | 28 | 33.357 | P | 0.200 | 0.023  |
| J04A | 2007 | 36 | 10 | 28 | 33.520 | P | 0.200 | -0.051 |
| L05A | 2007 | 36 | 10 | 28 | 33.631 | P | 0.200 | 0.167  |
| U11A | 2007 | 36 | 10 | 28 | 33.738 | P | 0.200 | 0.232  |
| S10A | 2007 | 36 | 10 | 28 | 33.893 | P | 0.200 | -0.082 |
| I04A | 2007 | 36 | 10 | 28 | 34.007 | P | 0.200 | -0.322 |
| P08A | 2007 | 36 | 10 | 28 | 34.622 | P | 0.200 | 0.132  |
| N07B | 2007 | 36 | 10 | 28 | 34.803 | P | 0.200 | -0.108 |
| Q09A | 2007 | 36 | 10 | 28 | 34.814 | P | 0.200 | 0.162  |
| K05A | 2007 | 36 | 10 | 28 | 35.601 | P | 0.200 | 0.103  |
| S11A | 2007 | 36 | 10 | 28 | 35.999 | P | 0.200 | 0.077  |
| O08A | 2007 | 36 | 10 | 28 | 36.093 | P | 0.200 | 0.003  |
| J05A | 2007 | 36 | 10 | 28 | 36.320 | P | 0.200 | 0.022  |
| M07A | 2007 | 36 | 10 | 28 | 36.361 | P | 0.200 | -0.009 |
| R10A | 2007 | 36 | 10 | 28 | 36.481 | P | 0.200 | 0.383  |
| P09A | 2007 | 36 | 10 | 28 | 36.966 | P | 0.200 | -0.080 |
| N08A | 2007 | 36 | 10 | 28 | 37.686 | P | 0.200 | 0.044  |
| L07A | 2007 | 36 | 10 | 28 | 38.200 | P | 0.200 | 0.294  |
| O09A | 2007 | 36 | 10 | 28 | 38.842 | P | 0.200 | 0.053  |
| BMN  | 2007 | 36 | 10 | 28 | 39.512 | P | 0.200 | -0.036 |
| P10A | 2007 | 36 | 10 | 28 | 39.558 | P | 0.200 | -0.114 |
| Q11A | 2007 | 36 | 10 | 28 | 40.029 | P | 0.200 | 0.045  |

2007 214 15 11 44.0872 -21.55500 -179.36099 617.7000

343

0.010

|      |      |     |    |    |        |   |       |       |
|------|------|-----|----|----|--------|---|-------|-------|
| FARB | 2007 | 214 | 15 | 22 | 46.741 | P | 0.200 | 0.132 |
| SCZ2 | 2007 | 214 | 15 | 22 | 46.848 | P | 0.200 | 0.095 |
| V04C | 2007 | 214 | 15 | 22 | 47.705 | P | 0.200 | 0.211 |



|      |      |     |    |    |        |   |       |        |
|------|------|-----|----|----|--------|---|-------|--------|
| BNLO | 2007 | 214 | 15 | 22 | 47.748 | P | 0.200 | 0.029  |
| HAST | 2007 | 214 | 15 | 22 | 47.783 | P | 0.200 | 0.379  |
| V03C | 2007 | 214 | 15 | 22 | 47.904 | P | 0.200 | 0.626  |
| PHL  | 2007 | 214 | 15 | 22 | 47.964 | P | 0.200 | 0.054  |
| SBC  | 2007 | 214 | 15 | 22 | 48.109 | P | 0.200 | 0.208  |
| JRSC | 2007 | 214 | 15 | 22 | 48.445 | P | 0.200 | 0.219  |
| MCCM | 2007 | 214 | 15 | 22 | 48.469 | P | 0.200 | 0.037  |
| LGU  | 2007 | 214 | 15 | 22 | 48.898 | P | 0.200 | -0.365 |
| CIA  | 2007 | 214 | 15 | 22 | 49.034 | P | 0.200 | -0.574 |
| SAO  | 2007 | 214 | 15 | 22 | 49.154 | P | 0.200 | 0.092  |
| MPP  | 2007 | 214 | 15 | 22 | 49.415 | P | 0.200 | 0.362  |
| PKD  | 2007 | 214 | 15 | 22 | 49.624 | P | 0.200 | 0.164  |
| BRK  | 2007 | 214 | 15 | 22 | 49.858 | P | 0.200 | 0.200  |
| SMM  | 2007 | 214 | 15 | 22 | 49.971 | P | 0.200 | 0.333  |
| BKS  | 2007 | 214 | 15 | 22 | 50.099 | P | 0.200 | 0.254  |
| RPV  | 2007 | 214 | 15 | 22 | 50.368 | P | 0.200 | -0.227 |
| CVS  | 2007 | 214 | 15 | 22 | 50.464 | P | 0.200 | -0.214 |
| FMP  | 2007 | 214 | 15 | 22 | 50.520 | P | 0.200 | -0.277 |
| BRIB | 2007 | 214 | 15 | 22 | 50.556 | P | 0.200 | 0.433  |
| MHC  | 2007 | 214 | 15 | 22 | 50.608 | P | 0.200 | 0.243  |
| U04C | 2007 | 214 | 15 | 22 | 50.688 | P | 0.200 | 0.707  |
| PACP | 2007 | 214 | 15 | 22 | 50.795 | P | 0.200 | 0.418  |
| DJJ  | 2007 | 214 | 15 | 22 | 50.948 | P | 0.200 | -0.358 |
| WENL | 2007 | 214 | 15 | 22 | 51.009 | P | 0.200 | 0.504  |
| P01C | 2007 | 214 | 15 | 22 | 51.619 | P | 0.200 | 0.274  |
| BDM  | 2007 | 214 | 15 | 22 | 51.644 | P | 0.200 | 0.480  |
| DEC  | 2007 | 214 | 15 | 22 | 51.655 | P | 0.200 | -0.534 |
| S04C | 2007 | 214 | 15 | 22 | 51.949 | P | 0.200 | 0.262  |
| PASC | 2007 | 214 | 15 | 22 | 51.988 | P | 0.200 | -0.606 |
| OSI  | 2007 | 214 | 15 | 22 | 51.996 | P | 0.200 | -0.084 |
| V05C | 2007 | 214 | 15 | 22 | 52.206 | P | 0.200 | 0.742  |
| U05C | 2007 | 214 | 15 | 22 | 52.583 | P | 0.200 | 0.520  |
| T05C | 2007 | 214 | 15 | 22 | 52.633 | P | 0.200 | 0.593  |
| ARV  | 2007 | 214 | 15 | 22 | 52.781 | P | 0.200 | -0.119 |
| MWC  | 2007 | 214 | 15 | 22 | 52.886 | P | 0.200 | -0.485 |
| MNRC | 2007 | 214 | 15 | 22 | 52.950 | P | 0.200 | 0.597  |
| CHF  | 2007 | 214 | 15 | 22 | 53.167 | P | 0.200 | -0.488 |
| VCS  | 2007 | 214 | 15 | 22 | 53.279 | P | 0.200 | -0.372 |
| VES  | 2007 | 214 | 15 | 22 | 53.709 | P | 0.200 | -0.360 |
| Q03C | 2007 | 214 | 15 | 22 | 53.840 | P | 0.200 | 1.076  |
| BFS  | 2007 | 214 | 15 | 22 | 54.234 | P | 0.200 | -0.406 |
| RCT  | 2007 | 214 | 15 | 22 | 54.241 | P | 0.200 | -0.769 |
| S05C | 2007 | 214 | 15 | 22 | 54.288 | P | 0.200 | -0.225 |
| GASB | 2007 | 214 | 15 | 22 | 55.045 | P | 0.200 | 1.103  |
| EDW2 | 2007 | 214 | 15 | 22 | 55.157 | P | 0.200 | -0.049 |
| SUTB | 2007 | 214 | 15 | 22 | 55.167 | P | 0.200 | -0.377 |
| T06C | 2007 | 214 | 15 | 22 | 55.268 | P | 0.200 | -0.340 |
| Q04C | 2007 | 214 | 15 | 22 | 55.454 | P | 0.200 | 0.025  |
| SNC3 | 2007 | 214 | 15 | 22 | 55.660 | P | 0.200 | 0.009  |
| SNB3 | 2007 | 214 | 15 | 22 | 55.833 | P | 0.200 | -0.253 |
| ISA  | 2007 | 214 | 15 | 22 | 55.866 | P | 0.200 | 0.050  |
| N02C | 2007 | 214 | 15 | 22 | 56.097 | P | 0.200 | 0.339  |
| O02C | 2007 | 214 | 15 | 22 | 56.172 | P | 0.200 | 0.754  |
| SVD  | 2007 | 214 | 15 | 22 | 56.175 | P | 0.200 | -0.127 |
| CMB  | 2007 | 214 | 15 | 22 | 56.178 | P | 0.200 | -0.167 |
| VTV  | 2007 | 214 | 15 | 22 | 56.249 | P | 0.200 | -0.385 |
| SN93 | 2007 | 214 | 15 | 22 | 56.280 | P | 0.200 | 0.393  |
| HELL | 2007 | 214 | 15 | 22 | 56.382 | P | 0.200 | -0.639 |
| SNA3 | 2007 | 214 | 15 | 22 | 56.590 | P | 0.200 | 0.288  |
| SNC4 | 2007 | 214 | 15 | 22 | 56.736 | P | 0.200 | -0.183 |
| SND4 | 2007 | 214 | 15 | 22 | 56.766 | P | 0.200 | -0.153 |
| SNE4 | 2007 | 214 | 15 | 22 | 56.868 | P | 0.200 | 0.034  |
| O03C | 2007 | 214 | 15 | 22 | 57.083 | P | 0.200 | 0.169  |

|      |      |     |    |    |        |   |       |        |
|------|------|-----|----|----|--------|---|-------|--------|
| SNA4 | 2007 | 214 | 15 | 22 | 57.158 | P | 0.200 | -0.132 |
| LAVA | 2007 | 214 | 15 | 22 | 57.221 | P | 0.200 | -0.121 |
| SN63 | 2007 | 214 | 15 | 22 | 57.226 | P | 0.200 | -0.330 |
| ORV  | 2007 | 214 | 15 | 22 | 57.263 | P | 0.200 | -0.104 |
| YO01 | 2007 | 214 | 15 | 22 | 57.336 | P | 0.200 | -0.313 |
| BBR  | 2007 | 214 | 15 | 22 | 57.385 | P | 0.200 | -0.141 |
| S06C | 2007 | 214 | 15 | 22 | 57.511 | P | 0.200 | -0.408 |
| YO02 | 2007 | 214 | 15 | 22 | 57.533 | P | 0.200 | -0.399 |
| WDC  | 2007 | 214 | 15 | 22 | 57.593 | P | 0.200 | 0.291  |
| YO03 | 2007 | 214 | 15 | 22 | 57.664 | P | 0.200 | -0.345 |
| SNG5 | 2007 | 214 | 15 | 22 | 57.685 | P | 0.200 | -0.095 |
| SNC5 | 2007 | 214 | 15 | 22 | 57.701 | P | 0.200 | -0.497 |
| SND5 | 2007 | 214 | 15 | 22 | 57.795 | P | 0.200 | -0.235 |
| YO04 | 2007 | 214 | 15 | 22 | 57.827 | P | 0.200 | -0.429 |
| SNB5 | 2007 | 214 | 15 | 22 | 57.976 | P | 0.200 | -0.332 |
| LRL  | 2007 | 214 | 15 | 22 | 57.990 | P | 0.200 | -0.057 |
| SNE5 | 2007 | 214 | 15 | 22 | 57.995 | P | 0.200 | -0.076 |
| YO05 | 2007 | 214 | 15 | 22 | 58.051 | P | 0.200 | -0.357 |
| SN64 | 2007 | 214 | 15 | 22 | 58.367 | P | 0.200 | -0.181 |
| YO06 | 2007 | 214 | 15 | 22 | 58.379 | P | 0.200 | -0.228 |
| SNA5 | 2007 | 214 | 15 | 22 | 58.397 | P | 0.200 | -0.181 |
| YO07 | 2007 | 214 | 15 | 22 | 58.432 | P | 0.200 | -0.185 |
| YO08 | 2007 | 214 | 15 | 22 | 58.525 | P | 0.200 | -0.301 |
| YO09 | 2007 | 214 | 15 | 22 | 58.745 | P | 0.200 | -0.238 |
| SN96 | 2007 | 214 | 15 | 22 | 58.903 | P | 0.200 | -0.215 |
| YO10 | 2007 | 214 | 15 | 22 | 59.057 | P | 0.200 | -0.126 |
| SNF6 | 2007 | 214 | 15 | 22 | 59.174 | P | 0.200 | -0.076 |
| YO11 | 2007 | 214 | 15 | 22 | 59.252 | P | 0.200 | -0.212 |
| SNE6 | 2007 | 214 | 15 | 22 | 59.271 | P | 0.200 | -0.173 |
| CWC  | 2007 | 214 | 15 | 22 | 59.283 | P | 0.200 | -0.381 |
| SNB6 | 2007 | 214 | 15 | 22 | 59.311 | P | 0.200 | -0.162 |
| SN55 | 2007 | 214 | 15 | 22 | 59.478 | P | 0.200 | -0.281 |
| R05C | 2007 | 214 | 15 | 22 | 59.524 | P | 0.200 | -0.103 |
| L02A | 2007 | 214 | 15 | 22 | 59.665 | P | 0.200 | 0.525  |
| P05C | 2007 | 214 | 15 | 22 | 59.688 | P | 0.200 | 0.166  |
| M02C | 2007 | 214 | 15 | 22 | 59.749 | P | 0.200 | 0.843  |
| SN86 | 2007 | 214 | 15 | 22 | 59.907 | P | 0.200 | -0.045 |
| SNG7 | 2007 | 214 | 15 | 23 | 0.121  | P | 0.200 | -0.146 |
| SNB7 | 2007 | 214 | 15 | 23 | 0.310  | P | 0.200 | -0.103 |
| MPM  | 2007 | 214 | 15 | 23 | 0.333  | P | 0.200 | -0.091 |
| GSC  | 2007 | 214 | 15 | 23 | 0.385  | P | 0.200 | -0.189 |
| SLA  | 2007 | 214 | 15 | 23 | 0.457  | P | 0.200 | -0.256 |
| SNC7 | 2007 | 214 | 15 | 23 | 0.462  | P | 0.200 | 0.110  |
| O05C | 2007 | 214 | 15 | 23 | 0.509  | P | 0.200 | 0.152  |
| HEC  | 2007 | 214 | 15 | 23 | 0.596  | P | 0.200 | -0.232 |
| TIN  | 2007 | 214 | 15 | 23 | 0.642  | P | 0.200 | -0.115 |
| MLAC | 2007 | 214 | 15 | 23 | 0.664  | P | 0.200 | 0.201  |
| SND7 | 2007 | 214 | 15 | 23 | 0.703  | P | 0.200 | 0.143  |
| SNE7 | 2007 | 214 | 15 | 23 | 0.814  | P | 0.200 | 0.046  |
| SN97 | 2007 | 214 | 15 | 23 | 0.895  | P | 0.200 | 0.122  |
| M03C | 2007 | 214 | 15 | 23 | 0.909  | P | 0.200 | 0.006  |
| YBH  | 2007 | 214 | 15 | 23 | 0.986  | P | 0.200 | 0.585  |
| R07C | 2007 | 214 | 15 | 23 | 1.112  | P | 0.200 | -0.029 |
| O04C | 2007 | 214 | 15 | 23 | 1.172  | P | 0.200 | 0.142  |
| SNA7 | 2007 | 214 | 15 | 23 | 1.201  | P | 0.200 | 0.071  |
| R06C | 2007 | 214 | 15 | 23 | 1.232  | P | 0.200 | 0.270  |
| SN87 | 2007 | 214 | 15 | 23 | 1.387  | P | 0.200 | 0.223  |
| HATC | 2007 | 214 | 15 | 23 | 1.637  | P | 0.200 | 0.136  |
| SNF8 | 2007 | 214 | 15 | 23 | 1.658  | P | 0.200 | -0.107 |
| K02A | 2007 | 214 | 15 | 23 | 1.771  | P | 0.200 | 0.503  |
| SND8 | 2007 | 214 | 15 | 23 | 1.870  | P | 0.200 | 0.134  |
| BEK  | 2007 | 214 | 15 | 23 | 1.949  | P | 0.200 | -0.157 |
| SN98 | 2007 | 214 | 15 | 23 | 2.096  | P | 0.200 | -0.130 |

|      |      |     |    |    |        |   |       |        |
|------|------|-----|----|----|--------|---|-------|--------|
| WCN  | 2007 | 214 | 15 | 23 | 2.402  | P | 0.200 | 0.158  |
| S08C | 2007 | 214 | 15 | 23 | 2.507  | P | 0.200 | 0.143  |
| SNF9 | 2007 | 214 | 15 | 23 | 2.613  | P | 0.200 | -0.137 |
| SNE9 | 2007 | 214 | 15 | 23 | 2.996  | P | 0.200 | -0.211 |
| P06A | 2007 | 214 | 15 | 23 | 3.018  | P | 0.200 | 0.092  |
| HUMO | 2007 | 214 | 15 | 23 | 3.049  | P | 0.200 | 0.617  |
| SNB9 | 2007 | 214 | 15 | 23 | 3.088  | P | 0.200 | 0.057  |
| FUR  | 2007 | 214 | 15 | 23 | 3.223  | P | 0.200 | -0.118 |
| SND9 | 2007 | 214 | 15 | 23 | 3.257  | P | 0.200 | 0.143  |
| ELFS | 2007 | 214 | 15 | 23 | 3.409  | P | 0.200 | 0.345  |
| GRA  | 2007 | 214 | 15 | 23 | 3.478  | P | 0.200 | 0.123  |
| M04C | 2007 | 214 | 15 | 23 | 3.505  | P | 0.200 | 0.362  |
| SHO  | 2007 | 214 | 15 | 23 | 3.633  | P | 0.200 | -0.388 |
| TUQ  | 2007 | 214 | 15 | 23 | 3.862  | P | 0.200 | -0.191 |
| M05C | 2007 | 214 | 15 | 23 | 4.125  | P | 0.200 | 0.082  |
| Q07A | 2007 | 214 | 15 | 23 | 4.230  | P | 0.200 | 0.139  |
| L04A | 2007 | 214 | 15 | 23 | 4.400  | P | 0.200 | 0.169  |
| O06A | 2007 | 214 | 15 | 23 | 4.415  | P | 0.200 | -0.104 |
| R08A | 2007 | 214 | 15 | 23 | 4.580  | P | 0.200 | -0.203 |
| J03A | 2007 | 214 | 15 | 23 | 5.306  | P | 0.200 | 0.781  |
| U10A | 2007 | 214 | 15 | 23 | 5.371  | P | 0.200 | 0.128  |
| S09A | 2007 | 214 | 15 | 23 | 5.470  | P | 0.200 | -0.468 |
| P07A | 2007 | 214 | 15 | 23 | 5.703  | P | 0.200 | 0.021  |
| M06C | 2007 | 214 | 15 | 23 | 5.759  | P | 0.200 | 0.192  |
| I03A | 2007 | 214 | 15 | 23 | 5.850  | P | 0.200 | 0.161  |
| N06A | 2007 | 214 | 15 | 23 | 6.150  | P | 0.200 | -0.046 |
| K04A | 2007 | 214 | 15 | 23 | 6.196  | P | 0.200 | 0.130  |
| Q08A | 2007 | 214 | 15 | 23 | 6.380  | P | 0.200 | -0.439 |
| V11A | 2007 | 214 | 15 | 23 | 6.667  | P | 0.200 | -0.074 |
| TPH  | 2007 | 214 | 15 | 23 | 6.700  | P | 0.200 | -0.241 |
| TPNV | 2007 | 214 | 15 | 23 | 6.930  | P | 0.200 | -0.099 |
| J04A | 2007 | 214 | 15 | 23 | 7.169  | P | 0.200 | 0.218  |
| O07A | 2007 | 214 | 15 | 23 | 7.221  | P | 0.200 | -0.294 |
| I04A | 2007 | 214 | 15 | 23 | 7.307  | P | 0.200 | -0.201 |
| L05A | 2007 | 214 | 15 | 23 | 7.553  | P | 0.200 | 0.367  |
| R09A | 2007 | 214 | 15 | 23 | 7.640  | P | 0.200 | -0.306 |
| S10A | 2007 | 214 | 15 | 23 | 8.256  | P | 0.200 | -0.360 |
| U11A | 2007 | 214 | 15 | 23 | 8.434  | P | 0.200 | -0.043 |
| P08A | 2007 | 214 | 15 | 23 | 8.759  | P | 0.200 | 0.047  |
| N07B | 2007 | 214 | 15 | 23 | 8.803  | P | 0.200 | -0.038 |
| Q09A | 2007 | 214 | 15 | 23 | 8.879  | P | 0.200 | -0.164 |
| K05A | 2007 | 214 | 15 | 23 | 9.294  | P | 0.200 | 0.368  |
| J05A | 2007 | 214 | 15 | 23 | 9.825  | P | 0.200 | 0.289  |
| O08A | 2007 | 214 | 15 | 23 | 10.100 | P | 0.200 | 0.023  |
| M07A | 2007 | 214 | 15 | 23 | 10.193 | P | 0.200 | 0.121  |
| S11A | 2007 | 214 | 15 | 23 | 10.246 | P | 0.200 | -0.248 |
| R10A | 2007 | 214 | 15 | 23 | 10.539 | P | 0.200 | 0.007  |
| P09A | 2007 | 214 | 15 | 23 | 10.884 | P | 0.200 | -0.256 |
| T11A | 2007 | 214 | 15 | 23 | 11.290 | P | 0.200 | 0.121  |
| N08A | 2007 | 214 | 15 | 23 | 11.338 | P | 0.200 | -0.079 |
| Q10A | 2007 | 214 | 15 | 23 | 11.676 | P | 0.200 | 0.100  |
| L07A | 2007 | 214 | 15 | 23 | 11.747 | P | 0.200 | 0.367  |
| O09A | 2007 | 214 | 15 | 23 | 12.620 | P | 0.200 | -0.016 |
| R11A | 2007 | 214 | 15 | 23 | 12.688 | P | 0.200 | -0.295 |
| BMN  | 2007 | 214 | 15 | 23 | 13.138 | P | 0.200 | -0.160 |
| P10A | 2007 | 214 | 15 | 23 | 13.215 | P | 0.200 | -0.388 |
| Q11A | 2007 | 214 | 15 | 23 | 13.830 | P | 0.200 | -0.234 |

2007 238 12 37 31.2665 -17.45700 -174.33501 127.4000

353

0.001

|      |      |     |    |    |        |   |       |        |
|------|------|-----|----|----|--------|---|-------|--------|
| SNCC | 2007 | 238 | 12 | 48 | 43.698 | P | 0.200 | -1.482 |
| SCZ2 | 2007 | 238 | 12 | 48 | 47.158 | P | 0.200 | -0.008 |
| FARB | 2007 | 238 | 12 | 48 | 47.262 | P | 0.200 | -0.057 |
| V04C | 2007 | 238 | 12 | 48 | 48.147 | P | 0.200 | 0.075  |

|      |      |     |    |    |        |   |       |        |
|------|------|-----|----|----|--------|---|-------|--------|
| HAST | 2007 | 238 | 12 | 48 | 48.291 | P | 0.200 | 0.247  |
| BNLO | 2007 | 238 | 12 | 48 | 48.358 | P | 0.200 | -0.106 |
| V03C | 2007 | 238 | 12 | 48 | 48.371 | P | 0.200 | 0.487  |
| SBC  | 2007 | 238 | 12 | 48 | 48.567 | P | 0.200 | 0.131  |
| PHL  | 2007 | 238 | 12 | 48 | 48.588 | P | 0.200 | 0.071  |
| JRSC | 2007 | 238 | 12 | 48 | 49.155 | P | 0.200 | 0.086  |
| MCCM | 2007 | 238 | 12 | 48 | 49.343 | P | 0.200 | -0.056 |
| LGU  | 2007 | 238 | 12 | 48 | 49.494 | P | 0.200 | -0.440 |
| CIA  | 2007 | 238 | 12 | 48 | 49.732 | P | 0.200 | -0.549 |
| SAO  | 2007 | 238 | 12 | 48 | 49.869 | P | 0.200 | -0.042 |
| MPP  | 2007 | 238 | 12 | 48 | 49.916 | P | 0.200 | 0.166  |
| PKD  | 2007 | 238 | 12 | 48 | 50.429 | P | 0.200 | 0.125  |
| SMM  | 2007 | 238 | 12 | 48 | 50.676 | P | 0.200 | 0.247  |
| BRK  | 2007 | 238 | 12 | 48 | 50.777 | P | 0.200 | 0.065  |
| BKS  | 2007 | 238 | 12 | 48 | 51.028 | P | 0.200 | 0.135  |
| RPV  | 2007 | 238 | 12 | 48 | 51.153 | P | 0.200 | -0.254 |
| FMP  | 2007 | 238 | 12 | 48 | 51.390 | P | 0.200 | -0.253 |
| CVS  | 2007 | 238 | 12 | 48 | 51.482 | P | 0.200 | -0.372 |
| MHC  | 2007 | 238 | 12 | 48 | 51.509 | P | 0.200 | 0.126  |
| U04C | 2007 | 238 | 12 | 48 | 51.530 | P | 0.200 | 0.619  |
| BRIB | 2007 | 238 | 12 | 48 | 51.585 | P | 0.200 | 0.347  |
| PACP | 2007 | 238 | 12 | 48 | 51.729 | P | 0.200 | 0.329  |
| DJJ  | 2007 | 238 | 12 | 48 | 51.953 | P | 0.200 | -0.298 |
| WENL | 2007 | 238 | 12 | 48 | 51.996 | P | 0.200 | 0.373  |
| BDM  | 2007 | 238 | 12 | 48 | 52.693 | P | 0.200 | 0.306  |
| DEC  | 2007 | 238 | 12 | 48 | 52.719 | P | 0.200 | -0.522 |
| P01C | 2007 | 238 | 12 | 48 | 52.870 | P | 0.200 | 0.100  |
| USC  | 2007 | 238 | 12 | 48 | 53.083 | P | 0.200 | 0.515  |
| S04C | 2007 | 238 | 12 | 48 | 53.090 | P | 0.200 | 0.197  |
| PASC | 2007 | 238 | 12 | 48 | 53.135 | P | 0.200 | -0.540 |
| V05C | 2007 | 238 | 12 | 48 | 53.231 | P | 0.200 | 0.712  |
| SDD  | 2007 | 238 | 12 | 48 | 53.741 | P | 0.200 | 0.180  |
| T05C | 2007 | 238 | 12 | 48 | 53.750 | P | 0.200 | 0.526  |
| U05C | 2007 | 238 | 12 | 48 | 53.772 | P | 0.200 | 0.530  |
| ARV  | 2007 | 238 | 12 | 48 | 53.885 | P | 0.200 | -0.220 |
| O01C | 2007 | 238 | 12 | 48 | 54.014 | P | 0.200 | 0.467  |
| MWC  | 2007 | 238 | 12 | 48 | 54.057 | P | 0.200 | -0.480 |
| BAK  | 2007 | 238 | 12 | 48 | 54.158 | P | 0.200 | 0.385  |
| MNRC | 2007 | 238 | 12 | 48 | 54.174 | P | 0.200 | 0.375  |
| CHF  | 2007 | 238 | 12 | 48 | 54.345 | P | 0.200 | -0.536 |
| VCS  | 2007 | 238 | 12 | 48 | 54.477 | P | 0.200 | -0.408 |
| VES  | 2007 | 238 | 12 | 48 | 55.053 | P | 0.200 | -0.394 |
| Q03C | 2007 | 238 | 12 | 48 | 55.199 | P | 0.200 | 0.946  |
| BFS  | 2007 | 238 | 12 | 48 | 55.583 | P | 0.200 | -0.392 |
| JCC  | 2007 | 238 | 12 | 48 | 55.643 | P | 0.200 | 0.271  |
| S05C | 2007 | 238 | 12 | 48 | 55.685 | P | 0.200 | -0.357 |
| RCT  | 2007 | 238 | 12 | 48 | 55.864 | P | 0.200 | -0.647 |
| R04C | 2007 | 238 | 12 | 48 | 56.356 | P | 0.200 | -0.475 |
| GASB | 2007 | 238 | 12 | 48 | 56.545 | P | 0.200 | 0.879  |
| EDW2 | 2007 | 238 | 12 | 48 | 56.564 | P | 0.200 | -0.093 |
| SUTB | 2007 | 238 | 12 | 48 | 56.735 | P | 0.200 | -0.642 |
| T06C | 2007 | 238 | 12 | 48 | 56.857 | P | 0.200 | -0.353 |
| Q04C | 2007 | 238 | 12 | 48 | 57.037 | P | 0.200 | -0.201 |
| SNC3 | 2007 | 238 | 12 | 48 | 57.345 | P | 0.200 | -0.121 |
| SNB3 | 2007 | 238 | 12 | 48 | 57.578 | P | 0.200 | -0.315 |
| SVD  | 2007 | 238 | 12 | 48 | 57.667 | P | 0.200 | -0.162 |
| ADO  | 2007 | 238 | 12 | 48 | 57.774 | P | 0.200 | -0.193 |
| O02C | 2007 | 238 | 12 | 48 | 57.899 | P | 0.200 | 0.542  |
| VTV  | 2007 | 238 | 12 | 48 | 57.915 | P | 0.200 | -0.324 |
| SN93 | 2007 | 238 | 12 | 48 | 57.982 | P | 0.200 | 0.302  |
| CMB  | 2007 | 238 | 12 | 48 | 58.008 | P | 0.200 | -0.149 |
| N02C | 2007 | 238 | 12 | 48 | 58.019 | P | 0.200 | 0.168  |
| HELL | 2007 | 238 | 12 | 48 | 58.252 | P | 0.200 | -0.531 |

|      |      |     |    |    |        |   |       |        |
|------|------|-----|----|----|--------|---|-------|--------|
| SNA3 | 2007 | 238 | 12 | 48 | 58.306 | P | 0.200 | 0.153  |
| SNE4 | 2007 | 238 | 12 | 48 | 58.595 | P | 0.200 | -0.241 |
| SND4 | 2007 | 238 | 12 | 48 | 58.665 | P | 0.200 | -0.212 |
| SNC4 | 2007 | 238 | 12 | 48 | 58.727 | P | 0.200 | -0.166 |
| O03C | 2007 | 238 | 12 | 48 | 58.979 | P | 0.200 | -0.063 |
| BBR  | 2007 | 238 | 12 | 48 | 59.014 | P | 0.200 | -0.180 |
| SNA4 | 2007 | 238 | 12 | 48 | 59.093 | P | 0.200 | -0.170 |
| ORV  | 2007 | 238 | 12 | 48 | 59.185 | P | 0.200 | -0.266 |
| SN63 | 2007 | 238 | 12 | 48 | 59.188 | P | 0.200 | -0.271 |
| LAVA | 2007 | 238 | 12 | 48 | 59.246 | P | 0.200 | -0.103 |
| YO01 | 2007 | 238 | 12 | 48 | 59.370 | P | 0.200 | -0.198 |
| M01C | 2007 | 238 | 12 | 48 | 59.389 | P | 0.200 | 0.596  |
| S06C | 2007 | 238 | 12 | 48 | 59.427 | P | 0.200 | -0.423 |
| YO02 | 2007 | 238 | 12 | 48 | 59.587 | P | 0.200 | -0.272 |
| WDC  | 2007 | 238 | 12 | 48 | 59.598 | P | 0.200 | 0.074  |
| SNG5 | 2007 | 238 | 12 | 48 | 59.675 | P | 0.200 | -0.275 |
| SNC5 | 2007 | 238 | 12 | 48 | 59.696 | P | 0.200 | -0.631 |
| SND5 | 2007 | 238 | 12 | 48 | 59.701 | P | 0.200 | -0.470 |
| YO03 | 2007 | 238 | 12 | 48 | 59.734 | P | 0.200 | -0.226 |
| LRL  | 2007 | 238 | 12 | 48 | 59.817 | P | 0.200 | -0.049 |
| SNE5 | 2007 | 238 | 12 | 48 | 59.907 | P | 0.200 | -0.291 |
| YO04 | 2007 | 238 | 12 | 49 | 0.019  | P | 0.200 | -0.200 |
| SNB5 | 2007 | 238 | 12 | 49 | 0.058  | P | 0.200 | -0.369 |
| YO05 | 2007 | 238 | 12 | 49 | 0.209  | P | 0.200 | -0.187 |
| RRX  | 2007 | 238 | 12 | 49 | 0.220  | P | 0.200 | -0.322 |
| SNA5 | 2007 | 238 | 12 | 49 | 0.373  | P | 0.200 | -0.318 |
| SN64 | 2007 | 238 | 12 | 49 | 0.403  | P | 0.200 | -0.169 |
| YO06 | 2007 | 238 | 12 | 49 | 0.521  | P | 0.200 | -0.115 |
| YO07 | 2007 | 238 | 12 | 49 | 0.572  | P | 0.200 | -0.074 |
| YO08 | 2007 | 238 | 12 | 49 | 0.675  | P | 0.200 | -0.172 |
| YO09 | 2007 | 238 | 12 | 49 | 0.915  | P | 0.200 | -0.132 |
| SN96 | 2007 | 238 | 12 | 49 | 0.959  | P | 0.200 | -0.283 |
| YO10 | 2007 | 238 | 12 | 49 | 1.217  | P | 0.200 | -0.064 |
| SNF6 | 2007 | 238 | 12 | 49 | 1.449  | P | 0.200 | -0.104 |
| SNC6 | 2007 | 238 | 12 | 49 | 1.469  | P | 0.200 | -0.220 |
| YO11 | 2007 | 238 | 12 | 49 | 1.488  | P | 0.200 | -0.087 |
| SNE6 | 2007 | 238 | 12 | 49 | 1.489  | P | 0.200 | -0.235 |
| SNB6 | 2007 | 238 | 12 | 49 | 1.568  | P | 0.200 | -0.149 |
| CWC  | 2007 | 238 | 12 | 49 | 1.584  | P | 0.200 | -0.110 |
| R05C | 2007 | 238 | 12 | 49 | 1.670  | P | 0.200 | -0.192 |
| SN55 | 2007 | 238 | 12 | 49 | 1.691  | P | 0.200 | -0.210 |
| K01A | 2007 | 238 | 12 | 49 | 1.830  | P | 0.200 | 0.607  |
| P05C | 2007 | 238 | 12 | 49 | 1.861  | P | 0.200 | 0.027  |
| M02C | 2007 | 238 | 12 | 49 | 1.999  | P | 0.200 | 0.556  |
| SN86 | 2007 | 238 | 12 | 49 | 2.159  | P | 0.200 | -0.042 |
| L02A | 2007 | 238 | 12 | 49 | 2.211  | P | 0.200 | 0.422  |
| HEC  | 2007 | 238 | 12 | 49 | 2.547  | P | 0.200 | -0.430 |
| GSC  | 2007 | 238 | 12 | 49 | 2.564  | P | 0.200 | -0.129 |
| SNG7 | 2007 | 238 | 12 | 49 | 2.568  | P | 0.200 | -0.162 |
| MPM  | 2007 | 238 | 12 | 49 | 2.673  | P | 0.200 | 0.119  |
| SNB7 | 2007 | 238 | 12 | 49 | 2.684  | P | 0.200 | -0.098 |
| SLA  | 2007 | 238 | 12 | 49 | 2.766  | P | 0.200 | -0.077 |
| SNC7 | 2007 | 238 | 12 | 49 | 2.770  | P | 0.200 | 0.025  |
| MLAC | 2007 | 238 | 12 | 49 | 2.912  | P | 0.200 | 0.215  |
| TIN  | 2007 | 238 | 12 | 49 | 3.037  | P | 0.200 | 0.054  |
| O05C | 2007 | 238 | 12 | 49 | 3.076  | P | 0.200 | 0.207  |
| SND7 | 2007 | 238 | 12 | 49 | 3.185  | P | 0.200 | 0.158  |
| SN97 | 2007 | 238 | 12 | 49 | 3.188  | P | 0.200 | 0.029  |
| SNE7 | 2007 | 238 | 12 | 49 | 3.330  | P | 0.200 | 0.069  |
| M03C | 2007 | 238 | 12 | 49 | 3.390  | P | 0.200 | -0.212 |
| R07C | 2007 | 238 | 12 | 49 | 3.476  | P | 0.200 | 0.000  |
| R06C | 2007 | 238 | 12 | 49 | 3.531  | P | 0.200 | 0.183  |
| YBH  | 2007 | 238 | 12 | 49 | 3.550  | P | 0.200 | 0.398  |

|      |      |     |    |    |        |   |       |        |
|------|------|-----|----|----|--------|---|-------|--------|
| O04C | 2007 | 238 | 12 | 49 | 3.648  | P | 0.200 | 0.013  |
| SN87 | 2007 | 238 | 12 | 49 | 3.746  | P | 0.200 | 0.194  |
| SNF8 | 2007 | 238 | 12 | 49 | 4.195  | P | 0.200 | -0.179 |
| HATC | 2007 | 238 | 12 | 49 | 4.219  | P | 0.200 | 0.015  |
| SND8 | 2007 | 238 | 12 | 49 | 4.390  | P | 0.200 | 0.051  |
| BEK  | 2007 | 238 | 12 | 49 | 4.570  | P | 0.200 | -0.176 |
| K02A | 2007 | 238 | 12 | 49 | 4.611  | P | 0.200 | 0.324  |
| SN98 | 2007 | 238 | 12 | 49 | 4.733  | P | 0.200 | -0.069 |
| WCN  | 2007 | 238 | 12 | 49 | 5.085  | P | 0.200 | 0.220  |
| S08C | 2007 | 238 | 12 | 49 | 5.211  | P | 0.200 | 0.405  |
| SNF9 | 2007 | 238 | 12 | 49 | 5.415  | P | 0.200 | -0.126 |
| P06A | 2007 | 238 | 12 | 49 | 5.818  | P | 0.200 | 0.164  |
| SNE9 | 2007 | 238 | 12 | 49 | 5.851  | P | 0.200 | -0.125 |
| SNB9 | 2007 | 238 | 12 | 49 | 5.907  | P | 0.200 | 0.166  |
| HUMO | 2007 | 238 | 12 | 49 | 5.971  | P | 0.200 | 0.459  |
| FUR  | 2007 | 238 | 12 | 49 | 5.986  | P | 0.200 | 0.078  |
| SND9 | 2007 | 238 | 12 | 49 | 6.135  | P | 0.200 | 0.255  |
| ELFS | 2007 | 238 | 12 | 49 | 6.198  | P | 0.200 | 0.256  |
| GRA  | 2007 | 238 | 12 | 49 | 6.247  | P | 0.200 | 0.318  |
| SHO  | 2007 | 238 | 12 | 49 | 6.270  | P | 0.200 | -0.346 |
| TAKO | 2007 | 238 | 12 | 49 | 6.360  | P | 0.200 | 0.317  |
| M04C | 2007 | 238 | 12 | 49 | 6.425  | P | 0.200 | 0.219  |
| J02A | 2007 | 238 | 12 | 49 | 6.488  | P | 0.200 | 0.303  |
| TUQ  | 2007 | 238 | 12 | 49 | 6.521  | P | 0.200 | -0.102 |
| DBO  | 2007 | 238 | 12 | 49 | 6.721  | P | 0.200 | 0.251  |
| M05C | 2007 | 238 | 12 | 49 | 7.072  | P | 0.200 | -0.062 |
| Q07A | 2007 | 238 | 12 | 49 | 7.104  | P | 0.200 | 0.181  |
| L04A | 2007 | 238 | 12 | 49 | 7.495  | P | 0.200 | 0.021  |
| O06A | 2007 | 238 | 12 | 49 | 7.511  | P | 0.200 | -0.013 |
| R08A | 2007 | 238 | 12 | 49 | 7.568  | P | 0.200 | -0.058 |
| U10A | 2007 | 238 | 12 | 49 | 8.338  | P | 0.200 | 0.326  |
| S09A | 2007 | 238 | 12 | 49 | 8.594  | P | 0.200 | -0.266 |
| J03A | 2007 | 238 | 12 | 49 | 8.710  | P | 0.200 | 0.687  |
| P07A | 2007 | 238 | 12 | 49 | 8.910  | P | 0.200 | 0.189  |
| M06C | 2007 | 238 | 12 | 49 | 8.958  | P | 0.200 | 0.142  |
| N06A | 2007 | 238 | 12 | 49 | 9.410  | P | 0.200 | -0.043 |
| I03A | 2007 | 238 | 12 | 49 | 9.465  | P | 0.200 | 0.092  |
| K04A | 2007 | 238 | 12 | 49 | 9.555  | P | 0.200 | -0.003 |
| V11A | 2007 | 238 | 12 | 49 | 9.790  | P | 0.200 | 0.131  |
| Q08A | 2007 | 238 | 12 | 49 | 9.802  | P | 0.200 | -0.110 |
| TPH  | 2007 | 238 | 12 | 49 | 9.969  | P | 0.200 | -0.031 |
| TPNV | 2007 | 238 | 12 | 49 | 10.237 | P | 0.200 | 0.205  |
| O07A | 2007 | 238 | 12 | 49 | 10.657 | P | 0.200 | -0.174 |
| J04A | 2007 | 238 | 12 | 49 | 10.667 | P | 0.200 | 0.039  |
| L05A | 2007 | 238 | 12 | 49 | 10.929 | P | 0.200 | 0.262  |
| R09A | 2007 | 238 | 12 | 49 | 11.135 | P | 0.200 | 0.007  |
| I04A | 2007 | 238 | 12 | 49 | 11.189 | P | 0.200 | -0.178 |
| U11A | 2007 | 238 | 12 | 49 | 11.748 | P | 0.200 | 0.121  |
| S10A | 2007 | 238 | 12 | 49 | 11.761 | P | 0.200 | -0.095 |
| P08A | 2007 | 238 | 12 | 49 | 12.382 | P | 0.200 | 0.279  |
| N07B | 2007 | 238 | 12 | 49 | 12.430 | P | 0.200 | 0.039  |
| Q09A | 2007 | 238 | 12 | 49 | 12.527 | P | 0.200 | 0.106  |
| K05A | 2007 | 238 | 12 | 49 | 13.023 | P | 0.200 | 0.301  |
| J05A | 2007 | 238 | 12 | 49 | 13.664 | P | 0.200 | 0.163  |
| O08A | 2007 | 238 | 12 | 49 | 13.803 | P | 0.200 | 0.086  |
| M07A | 2007 | 238 | 12 | 49 | 13.973 | P | 0.200 | 0.127  |
| S11A | 2007 | 238 | 12 | 49 | 14.031 | P | 0.200 | 0.061  |
| R10A | 2007 | 238 | 12 | 49 | 14.357 | P | 0.200 | 0.328  |
| P09A | 2007 | 238 | 12 | 49 | 14.798 | P | 0.200 | -0.050 |
| T11A | 2007 | 238 | 12 | 49 | 15.034 | P | 0.200 | 0.321  |
| N08A | 2007 | 238 | 12 | 49 | 15.364 | P | 0.200 | 0.075  |
| Q10A | 2007 | 238 | 12 | 49 | 15.472 | P | 0.200 | 0.194  |
| L07A | 2007 | 238 | 12 | 49 | 15.756 | P | 0.200 | 0.373  |

|      |      |     |    |    |        |   |       |        |
|------|------|-----|----|----|--------|---|-------|--------|
| O09A | 2007 | 238 | 12 | 49 | 16.677 | P | 0.200 | 0.085  |
| R11A | 2007 | 238 | 12 | 49 | 16.716 | P | 0.200 | -0.098 |
| BMN  | 2007 | 238 | 12 | 49 | 17.297 | P | 0.200 | -0.054 |
| P10A | 2007 | 238 | 12 | 49 | 17.417 | P | 0.200 | -0.169 |
| Q11A | 2007 | 238 | 12 | 49 | 18.032 | P | 0.200 | -0.009 |

|      |     |    |    |         |           |           |          |     |       |
|------|-----|----|----|---------|-----------|-----------|----------|-----|-------|
| 1988 | 223 | 13 | 11 | 22.0374 | -14.88200 | 167.30000 | 134.0000 | 424 | 0.002 |
|------|-----|----|----|---------|-----------|-----------|----------|-----|-------|

|     |      |     |    |    |        |   |       |        |
|-----|------|-----|----|----|--------|---|-------|--------|
| arc | 1988 | 223 | 13 | 23 | 49.680 | P | 0.200 | -0.381 |
| bmd | 1988 | 223 | 13 | 23 | 50.000 | P | 0.200 | 0.095  |
| ccr | 1988 | 223 | 13 | 23 | 49.420 | P | 0.200 | -0.017 |
| jhn | 1988 | 223 | 13 | 23 | 48.500 | P | 0.200 | -0.694 |
| pmt | 1988 | 223 | 13 | 23 | 50.280 | P | 0.200 | -0.306 |
| WMD | 1988 | 223 | 13 | 23 | 49.060 | P | 0.200 | -0.602 |
| cou | 1988 | 223 | 13 | 23 | 50.670 | P | 0.200 | -0.153 |
| jun | 1988 | 223 | 13 | 23 | 50.930 | P | 0.200 | 0.083  |
| twr | 1988 | 223 | 13 | 23 | 50.000 | P | 0.200 | -0.378 |
| wil | 1988 | 223 | 13 | 23 | 49.770 | P | 0.200 | -0.379 |
| BMT | 1988 | 223 | 13 | 23 | 47.670 | P | 0.200 | 0.367  |
| BNP | 1988 | 223 | 13 | 23 | 53.480 | P | 0.200 | 0.012  |
| CLC | 1988 | 223 | 13 | 23 | 52.320 | P | 0.200 | 0.069  |
| DTP | 1988 | 223 | 13 | 23 | 50.570 | P | 0.200 | 0.234  |
| FRI | 1988 | 223 | 13 | 23 | 46.280 | P | 0.200 | -0.250 |
| GSC | 1988 | 223 | 13 | 23 | 54.300 | P | 0.200 | 0.012  |
| ISA | 1988 | 223 | 13 | 23 | 48.770 | P | 0.200 | 0.093  |
| JFS | 1988 | 223 | 13 | 23 | 51.460 | P | 0.200 | 0.282  |
| SRT | 1988 | 223 | 13 | 23 | 51.800 | P | 0.200 | 0.321  |
| TEJ | 1988 | 223 | 13 | 23 | 47.200 | P | 0.200 | 0.065  |
| TOW | 1988 | 223 | 13 | 23 | 52.120 | P | 0.200 | 0.532  |
| WAS | 1988 | 223 | 13 | 23 | 48.460 | P | 0.200 | -0.351 |
| WBS | 1988 | 223 | 13 | 23 | 50.080 | P | 0.200 | 0.173  |
| WCH | 1988 | 223 | 13 | 23 | 50.790 | P | 0.200 | -0.136 |
| WCS | 1988 | 223 | 13 | 23 | 52.250 | P | 0.200 | 0.229  |
| WHF | 1988 | 223 | 13 | 23 | 49.220 | P | 0.200 | 0.011  |
| WHS | 1988 | 223 | 13 | 23 | 52.280 | P | 0.200 | -0.008 |
| WHV | 1988 | 223 | 13 | 23 | 48.520 | P | 0.200 | 0.242  |
| WJP | 1988 | 223 | 13 | 23 | 48.620 | P | 0.200 | 0.280  |
| WLH | 1988 | 223 | 13 | 23 | 50.110 | P | 0.200 | -0.277 |
| WMF | 1988 | 223 | 13 | 23 | 51.930 | P | 0.200 | 0.074  |
| WOF | 1988 | 223 | 13 | 23 | 47.680 | P | 0.200 | -0.107 |
| WOR | 1988 | 223 | 13 | 23 | 49.700 | P | 0.200 | 0.022  |
| WRC | 1988 | 223 | 13 | 23 | 52.470 | P | 0.200 | 0.290  |
| WRV | 1988 | 223 | 13 | 23 | 51.590 | P | 0.200 | 0.039  |
| WSC | 1988 | 223 | 13 | 23 | 51.040 | P | 0.200 | 0.060  |
| WVP | 1988 | 223 | 13 | 23 | 51.930 | P | 0.200 | 0.284  |
| WWP | 1988 | 223 | 13 | 23 | 50.410 | P | 0.200 | 0.064  |
| XMS | 1988 | 223 | 13 | 23 | 52.920 | P | 0.200 | 0.282  |
| BLK | 1988 | 223 | 13 | 23 | 52.620 | P | 0.200 | 0.218  |
| CAL | 1988 | 223 | 13 | 23 | 49.710 | P | 0.200 | 0.078  |
| FLS | 1988 | 223 | 13 | 23 | 52.800 | P | 0.200 | -0.119 |
| HOD | 1988 | 223 | 13 | 23 | 51.650 | P | 0.200 | -0.354 |
| JAW | 1988 | 223 | 13 | 23 | 49.810 | P | 0.200 | 0.041  |
| SBK | 1988 | 223 | 13 | 23 | 51.130 | P | 0.200 | -0.041 |

|      |     |    |   |         |           |           |          |     |       |
|------|-----|----|---|---------|-----------|-----------|----------|-----|-------|
| 1988 | 184 | 10 | 1 | 31.5098 | -14.29500 | 167.18800 | 156.0000 | 404 | 0.002 |
|------|-----|----|---|---------|-----------|-----------|----------|-----|-------|

|     |      |     |    |    |        |   |       |        |
|-----|------|-----|----|----|--------|---|-------|--------|
| arc | 1988 | 184 | 10 | 13 | 55.300 | P | 0.200 | -0.353 |
| bla | 1988 | 184 | 10 | 13 | 55.670 | P | 0.200 | -0.365 |
| bmd | 1988 | 184 | 10 | 13 | 55.300 | P | 0.200 | -0.201 |
| jhn | 1988 | 184 | 10 | 13 | 54.100 | P | 0.200 | -0.678 |
| mnk | 1988 | 184 | 10 | 13 | 55.350 | P | 0.200 | -0.023 |
| bar | 1988 | 184 | 10 | 13 | 55.700 | P | 0.200 | -0.190 |
| cha | 1988 | 184 | 10 | 13 | 55.800 | P | 0.200 | -0.361 |
| cou | 1988 | 184 | 10 | 13 | 56.300 | P | 0.200 | -0.100 |
| jun | 1988 | 184 | 10 | 13 | 56.150 | P | 0.200 | -0.261 |

|     |      |     |    |    |        |   |       |        |
|-----|------|-----|----|----|--------|---|-------|--------|
| twr | 1988 | 184 | 10 | 13 | 55.650 | P | 0.200 | -0.300 |
| wil | 1988 | 184 | 10 | 13 | 55.300 | P | 0.200 | -0.426 |
| BMT | 1988 | 184 | 10 | 13 | 53.270 | P | 0.200 | 0.356  |
| BNP | 1988 | 184 | 10 | 13 | 59.100 | P | 0.200 | 0.101  |
| CAL | 1988 | 184 | 10 | 13 | 55.370 | P | 0.200 | 0.107  |
| CLC | 1988 | 184 | 10 | 13 | 57.980 | P | 0.200 | 0.114  |
| FRI | 1988 | 184 | 10 | 13 | 51.830 | P | 0.200 | -0.217 |
| GSC | 1988 | 184 | 10 | 14 | 0.070  | P | 0.200 | 0.116  |
| ISA | 1988 | 184 | 10 | 13 | 54.480 | P | 0.200 | 0.205  |
| LRM | 1988 | 184 | 10 | 13 | 57.080 | P | 0.200 | 0.130  |
| SRT | 1988 | 184 | 10 | 13 | 57.450 | P | 0.200 | 0.358  |
| TOW | 1988 | 184 | 10 | 13 | 57.730 | P | 0.200 | 0.533  |
| WAS | 1988 | 184 | 10 | 13 | 54.070 | P | 0.200 | -0.333 |
| WBS | 1988 | 184 | 10 | 13 | 55.760 | P | 0.200 | 0.243  |
| WCH | 1988 | 184 | 10 | 13 | 56.420 | P | 0.200 | -0.105 |
| WCS | 1988 | 184 | 10 | 13 | 57.850 | P | 0.200 | 0.227  |
| WCX | 1988 | 184 | 10 | 13 | 57.630 | P | 0.200 | -0.031 |
| WHF | 1988 | 184 | 10 | 13 | 54.820 | P | 0.200 | 0.009  |
| WHS | 1988 | 184 | 10 | 13 | 57.880 | P | 0.200 | -0.005 |
| WHV | 1988 | 184 | 10 | 13 | 54.160 | P | 0.200 | 0.283  |
| WJP | 1988 | 184 | 10 | 13 | 54.270 | P | 0.200 | 0.326  |
| WLH | 1988 | 184 | 10 | 13 | 55.700 | P | 0.200 | -0.272 |
| WMF | 1988 | 184 | 10 | 13 | 57.610 | P | 0.200 | 0.156  |
| WOF | 1988 | 184 | 10 | 13 | 53.250 | P | 0.200 | -0.129 |
| WOR | 1988 | 184 | 10 | 13 | 55.310 | P | 0.200 | 0.027  |
| WRC | 1988 | 184 | 10 | 13 | 58.110 | P | 0.200 | 0.319  |
| WSC | 1988 | 184 | 10 | 13 | 56.680 | P | 0.200 | 0.090  |
| WSH | 1988 | 184 | 10 | 13 | 57.890 | P | 0.200 | -0.043 |
| WVP | 1988 | 184 | 10 | 13 | 57.530 | P | 0.200 | 0.280  |
| WWP | 1988 | 184 | 10 | 13 | 56.050 | P | 0.200 | 0.099  |
| XMS | 1988 | 184 | 10 | 13 | 58.520 | P | 0.200 | 0.248  |
| BLK | 1988 | 184 | 10 | 13 | 58.300 | P | 0.200 | 0.246  |
| DTP | 1988 | 184 | 10 | 13 | 56.300 | P | 0.200 | 0.333  |
| FLS | 1988 | 184 | 10 | 13 | 58.480 | P | 0.200 | -0.102 |
| HOD | 1988 | 184 | 10 | 13 | 57.340 | P | 0.200 | -0.317 |
| JFS | 1988 | 184 | 10 | 13 | 56.750 | P | 0.200 | -0.057 |
| SBK | 1988 | 184 | 10 | 13 | 56.770 | P | 0.200 | -0.037 |

|      |      |     |    |         |           |           |         |        |       |
|------|------|-----|----|---------|-----------|-----------|---------|--------|-------|
| 2005 | 348  | 6   | 45 | 42.3553 | -14.59600 | 167.92799 | 10.0000 | 47     | 0.003 |
| FARB | 2005 | 348 | 6  | 58      | 7.714     | P         | 0.200   | -0.166 |       |
| P01C | 2005 | 348 | 6  | 58      | 10.582    | P         | 0.200   | 0.051  |       |
| HAST | 2005 | 348 | 6  | 58      | 10.874    | P         | 0.200   | 0.142  |       |
| CVS  | 2005 | 348 | 6  | 58      | 11.032    | P         | 0.200   | -0.430 |       |
| SAO  | 2005 | 348 | 6  | 58      | 11.987    | P         | 0.200   | -0.039 |       |
| MHC  | 2005 | 348 | 6  | 58      | 12.719    | P         | 0.200   | 0.126  |       |
| MNRC | 2005 | 348 | 6  | 58      | 13.002    | P         | 0.200   | 0.423  |       |
| PACP | 2005 | 348 | 6  | 58      | 13.417    | P         | 0.200   | 0.261  |       |
| N02C | 2005 | 348 | 6  | 58      | 13.798    | P         | 0.200   | 0.266  |       |
| PKD  | 2005 | 348 | 6  | 58      | 13.812    | P         | 0.200   | 0.119  |       |
| S04C | 2005 | 348 | 6  | 58      | 14.014    | P         | 0.200   | 0.147  |       |
| GASB | 2005 | 348 | 6  | 58      | 14.147    | P         | 0.200   | 0.900  |       |
| U04C | 2005 | 348 | 6  | 58      | 14.372    | P         | 0.200   | 0.683  |       |
| MPP  | 2005 | 348 | 6  | 58      | 14.997    | P         | 0.200   | 0.245  |       |
| SMM  | 2005 | 348 | 6  | 58      | 15.064    | P         | 0.200   | 0.298  |       |
| SUTB | 2005 | 348 | 6  | 58      | 15.083    | P         | 0.200   | -0.615 |       |
| WDC  | 2005 | 348 | 6  | 58      | 15.749    | P         | 0.200   | 0.053  |       |
| Q04C | 2005 | 348 | 6  | 58      | 15.961    | P         | 0.200   | -0.203 |       |
| R04C | 2005 | 348 | 6  | 58      | 16.244    | P         | 0.200   | -0.432 |       |
| S05C | 2005 | 348 | 6  | 58      | 16.929    | P         | 0.200   | -0.344 |       |
| M02C | 2005 | 348 | 6  | 58      | 16.967    | P         | 0.200   | 0.652  |       |
| ORV  | 2005 | 348 | 6  | 58      | 17.007    | P         | 0.200   | -0.257 |       |
| SN71 | 2005 | 348 | 6  | 58      | 17.080    | P         | 0.200   | -0.315 |       |
| YBH  | 2005 | 348 | 6  | 58      | 17.968    | P         | 0.200   | 0.441  |       |



|      |      |     |   |    |        |   |       |        |
|------|------|-----|---|----|--------|---|-------|--------|
| SN51 | 2005 | 348 | 6 | 58 | 18.098 | P | 0.200 | 0.122  |
| CMB  | 2005 | 348 | 6 | 58 | 18.103 | P | 0.200 | -0.230 |
| LAVA | 2005 | 348 | 6 | 58 | 18.333 | P | 0.200 | -0.098 |
| OSI  | 2005 | 348 | 6 | 58 | 18.517 | P | 0.200 | 0.089  |
| VES  | 2005 | 348 | 6 | 58 | 18.557 | P | 0.200 | -0.386 |
| SN62 | 2005 | 348 | 6 | 58 | 18.586 | P | 0.200 | -0.420 |
| M03C | 2005 | 348 | 6 | 58 | 18.629 | P | 0.200 | -0.098 |
| DEC  | 2005 | 348 | 6 | 58 | 18.656 | P | 0.200 | -0.424 |
| ARV  | 2005 | 348 | 6 | 58 | 18.701 | P | 0.200 | 0.013  |
| T06C | 2005 | 348 | 6 | 58 | 18.717 | P | 0.200 | -0.240 |
| HUMO | 2005 | 348 | 6 | 58 | 18.771 | P | 0.200 | 0.247  |
| SN73 | 2005 | 348 | 6 | 58 | 18.796 | P | 0.200 | -0.225 |
| SN52 | 2005 | 348 | 6 | 58 | 18.813 | P | 0.200 | -0.375 |
| SN95 | 2005 | 348 | 6 | 58 | 19.214 | P | 0.200 | -0.431 |
| SN11 | 2005 | 348 | 6 | 58 | 19.405 | P | 0.200 | -0.301 |
| SN53 | 2005 | 348 | 6 | 58 | 19.799 | P | 0.200 | -0.362 |
| S06C | 2005 | 348 | 6 | 58 | 19.862 | P | 0.200 | -0.430 |
| HATC | 2005 | 348 | 6 | 58 | 20.073 | P | 0.200 | -0.028 |
| SN22 | 2005 | 348 | 6 | 58 | 20.108 | P | 0.200 | -0.303 |
| O05C | 2005 | 348 | 6 | 58 | 20.168 | P | 0.200 | 0.077  |
| P05C | 2005 | 348 | 6 | 58 | 20.371 | P | 0.200 | 0.243  |
| O04C | 2005 | 348 | 6 | 58 | 20.386 | P | 0.200 | 0.027  |
| SN85 | 2005 | 348 | 6 | 58 | 20.399 | P | 0.200 | -0.226 |
| SN43 | 2005 | 348 | 6 | 58 | 20.605 | P | 0.200 | -0.150 |
| HELL | 2005 | 348 | 6 | 58 | 20.639 | P | 0.200 | -0.384 |
| M04C | 2005 | 348 | 6 | 58 | 20.825 | P | 0.200 | 0.244  |
| R05C | 2005 | 348 | 6 | 58 | 21.009 | P | 0.200 | -0.015 |
| SN23 | 2005 | 348 | 6 | 58 | 21.105 | P | 0.200 | -0.199 |
| SN54 | 2005 | 348 | 6 | 58 | 21.108 | P | 0.200 | -0.125 |
| ISA  | 2005 | 348 | 6 | 58 | 21.273 | P | 0.200 | 0.156  |
| BFS  | 2005 | 348 | 6 | 58 | 21.421 | P | 0.200 | -0.340 |
| SN44 | 2005 | 348 | 6 | 58 | 21.518 | P | 0.200 | -0.075 |
| SN86 | 2005 | 348 | 6 | 58 | 21.671 | P | 0.200 | -0.013 |
| EDW2 | 2005 | 348 | 6 | 58 | 21.680 | P | 0.200 | 0.153  |
| SN55 | 2005 | 348 | 6 | 58 | 22.129 | P | 0.200 | -0.207 |
| M05C | 2005 | 348 | 6 | 58 | 22.182 | P | 0.200 | -0.056 |
| SN34 | 2005 | 348 | 6 | 58 | 22.254 | P | 0.200 | -0.075 |
| SN76 | 2005 | 348 | 6 | 58 | 22.326 | P | 0.200 | -0.149 |
| ELFS | 2005 | 348 | 6 | 58 | 22.411 | P | 0.200 | 0.217  |
| SN45 | 2005 | 348 | 6 | 58 | 22.619 | P | 0.200 | -0.144 |
| R06C | 2005 | 348 | 6 | 58 | 23.102 | P | 0.200 | 0.304  |
| SN25 | 2005 | 348 | 6 | 58 | 23.651 | P | 0.200 | 0.021  |
| SN46 | 2005 | 348 | 6 | 58 | 23.760 | P | 0.200 | 0.013  |
| R07C | 2005 | 348 | 6 | 58 | 23.798 | P | 0.200 | 0.210  |
| SN15 | 2005 | 348 | 6 | 58 | 24.087 | P | 0.200 | 0.361  |
| LRL  | 2005 | 348 | 6 | 58 | 24.115 | P | 0.200 | 0.280  |
| CWC  | 2005 | 348 | 6 | 58 | 24.184 | P | 0.200 | -0.034 |
| SN57 | 2005 | 348 | 6 | 58 | 24.236 | P | 0.200 | 0.321  |
| M06C | 2005 | 348 | 6 | 58 | 24.406 | P | 0.200 | 0.186  |
| SN36 | 2005 | 348 | 6 | 58 | 24.449 | P | 0.200 | 0.114  |
| SN47 | 2005 | 348 | 6 | 58 | 24.491 | P | 0.200 | -0.060 |
| BBR  | 2005 | 348 | 6 | 58 | 24.627 | P | 0.200 | -0.209 |
| TIN  | 2005 | 348 | 6 | 58 | 24.781 | P | 0.200 | 0.172  |
| SN26 | 2005 | 348 | 6 | 58 | 24.824 | P | 0.200 | 0.231  |
| SN37 | 2005 | 348 | 6 | 58 | 25.157 | P | 0.200 | 0.221  |
| RRX  | 2005 | 348 | 6 | 58 | 25.289 | P | 0.200 | 0.023  |
| SN48 | 2005 | 348 | 6 | 58 | 25.397 | P | 0.200 | -0.098 |
| MPM  | 2005 | 348 | 6 | 58 | 25.846 | P | 0.200 | 0.238  |
| SN38 | 2005 | 348 | 6 | 58 | 25.922 | P | 0.200 | -0.069 |
| SN28 | 2005 | 348 | 6 | 58 | 26.546 | P | 0.200 | 0.152  |
| GSC  | 2005 | 348 | 6 | 58 | 26.933 | P | 0.200 | 0.104  |
| MNV  | 2005 | 348 | 6 | 58 | 27.264 | P | 0.200 | 0.027  |
| HEC  | 2005 | 348 | 6 | 58 | 27.647 | P | 0.200 | -0.053 |

|      |      |     |   |    |        |   |       |        |
|------|------|-----|---|----|--------|---|-------|--------|
| GRA  | 2005 | 348 | 6 | 58 | 27.823 | P | 0.200 | 0.240  |
| FUR  | 2005 | 348 | 6 | 58 | 28.597 | P | 0.200 | 0.286  |
| SHO  | 2005 | 348 | 6 | 58 | 29.592 | P | 0.200 | -0.160 |
| TPH  | 2005 | 348 | 6 | 58 | 30.085 | P | 0.200 | 0.022  |
| TUQ  | 2005 | 348 | 6 | 58 | 30.368 | P | 0.200 | -0.034 |
| TPNV | 2005 | 348 | 6 | 58 | 31.756 | P | 0.200 | 0.101  |

|      |     |    |    |         |           |           |         |    |        |
|------|-----|----|----|---------|-----------|-----------|---------|----|--------|
| 2005 | 268 | 12 | 55 | 45.4949 | -17.51500 | 167.80099 | 30.0000 | 22 | -0.001 |
|------|-----|----|----|---------|-----------|-----------|---------|----|--------|

|      |      |     |    |   |        |   |       |        |
|------|------|-----|----|---|--------|---|-------|--------|
| BNLO | 2005 | 268 | 13 | 8 | 19.912 | P | 0.200 | -0.161 |
| JRSC | 2005 | 268 | 13 | 8 | 20.422 | P | 0.200 | 0.103  |
| HAST | 2005 | 268 | 13 | 8 | 20.887 | P | 0.200 | 0.227  |
| BRK  | 2005 | 268 | 13 | 8 | 21.266 | P | 0.200 | -0.009 |
| CVS  | 2005 | 268 | 13 | 8 | 21.355 | P | 0.200 | -0.401 |
| BKS  | 2005 | 268 | 13 | 8 | 21.461 | P | 0.200 | -0.011 |
| BRIB | 2005 | 268 | 13 | 8 | 21.998 | P | 0.200 | 0.299  |
| SAO  | 2005 | 268 | 13 | 8 | 22.022 | P | 0.200 | 0.049  |
| SCZ2 | 2005 | 268 | 13 | 8 | 22.536 | P | 0.200 | -0.272 |
| MHC  | 2005 | 268 | 13 | 8 | 22.848 | P | 0.200 | 0.209  |
| BDM  | 2005 | 268 | 13 | 8 | 22.976 | P | 0.200 | 0.188  |
| MNRC | 2005 | 268 | 13 | 8 | 23.224 | P | 0.200 | 0.311  |
| PACP | 2005 | 268 | 13 | 8 | 23.400 | P | 0.200 | 0.304  |
| SBC  | 2005 | 268 | 13 | 8 | 23.541 | P | 0.200 | 0.088  |
| PKD  | 2005 | 268 | 13 | 8 | 23.599 | P | 0.200 | 0.221  |
| U04C | 2005 | 268 | 13 | 8 | 24.097 | P | 0.200 | 0.637  |
| S04C | 2005 | 268 | 13 | 8 | 24.156 | P | 0.200 | 0.284  |
| MPP  | 2005 | 268 | 13 | 8 | 24.335 | P | 0.200 | 0.148  |
| Q03C | 2005 | 268 | 13 | 8 | 24.419 | P | 0.200 | 0.742  |
| GASB | 2005 | 268 | 13 | 8 | 24.438 | P | 0.200 | 0.745  |
| N02C | 2005 | 268 | 13 | 8 | 24.441 | P | 0.200 | 0.259  |
| LGU  | 2005 | 268 | 13 | 8 | 24.978 | P | 0.200 | -0.290 |
| SUTB | 2005 | 268 | 13 | 8 | 25.277 | P | 0.200 | -0.680 |
| T05C | 2005 | 268 | 13 | 8 | 25.593 | P | 0.200 | 0.617  |
| CIA  | 2005 | 268 | 13 | 8 | 25.818 | P | 0.200 | -0.596 |
| Q04C | 2005 | 268 | 13 | 8 | 26.148 | P | 0.200 | -0.172 |
| WDC  | 2005 | 268 | 13 | 8 | 26.192 | P | 0.200 | -0.013 |
| R04C | 2005 | 268 | 13 | 8 | 26.447 | P | 0.200 | -0.245 |
| S05C | 2005 | 268 | 13 | 8 | 26.734 | P | 0.200 | -0.367 |
| SN71 | 2005 | 268 | 13 | 8 | 26.929 | P | 0.200 | -0.328 |
| ORV  | 2005 | 268 | 13 | 8 | 27.232 | P | 0.200 | -0.284 |
| M02C | 2005 | 268 | 13 | 8 | 27.481 | P | 0.200 | 0.539  |
| OSI  | 2005 | 268 | 13 | 8 | 27.535 | P | 0.200 | -0.138 |
| SN51 | 2005 | 268 | 13 | 8 | 27.796 | P | 0.200 | 0.061  |
| VES  | 2005 | 268 | 13 | 8 | 27.880 | P | 0.200 | -0.498 |
| ARV  | 2005 | 268 | 13 | 8 | 28.098 | P | 0.200 | 0.117  |
| CMB  | 2005 | 268 | 13 | 8 | 28.138 | P | 0.200 | -0.088 |
| RCT  | 2005 | 268 | 13 | 8 | 28.225 | P | 0.200 | -0.597 |
| LAVA | 2005 | 268 | 13 | 8 | 28.300 | P | 0.200 | -0.161 |
| T06C | 2005 | 268 | 13 | 8 | 28.426 | P | 0.200 | -0.206 |
| YBH  | 2005 | 268 | 13 | 8 | 28.433 | P | 0.200 | 0.284  |
| SN62 | 2005 | 268 | 13 | 8 | 28.458 | P | 0.200 | -0.332 |
| SN73 | 2005 | 268 | 13 | 8 | 28.610 | P | 0.200 | -0.239 |
| SN52 | 2005 | 268 | 13 | 8 | 28.676 | P | 0.200 | -0.239 |
| SN11 | 2005 | 268 | 13 | 8 | 28.909 | P | 0.200 | -0.349 |
| M03C | 2005 | 268 | 13 | 8 | 29.005 | P | 0.200 | -0.223 |
| SN84 | 2005 | 268 | 13 | 8 | 29.059 | P | 0.200 | -0.484 |
| SN95 | 2005 | 268 | 13 | 8 | 29.102 | P | 0.200 | -0.453 |
| SN42 | 2005 | 268 | 13 | 8 | 29.407 | P | 0.200 | -0.130 |
| SN53 | 2005 | 268 | 13 | 8 | 29.501 | P | 0.200 | -0.381 |
| SN63 | 2005 | 268 | 13 | 8 | 29.510 | P | 0.200 | -0.369 |
| HUMO | 2005 | 268 | 13 | 8 | 29.540 | P | 0.200 | 0.276  |
| SN74 | 2005 | 268 | 13 | 8 | 29.603 | P | 0.200 | -0.239 |
| SN22 | 2005 | 268 | 13 | 8 | 29.701 | P | 0.200 | -0.323 |
| HELL | 2005 | 268 | 13 | 8 | 30.133 | P | 0.200 | -0.404 |

|      |      |     |    |   |        |   |       |        |
|------|------|-----|----|---|--------|---|-------|--------|
| SN85 | 2005 | 268 | 13 | 8 | 30.223 | P | 0.200 | -0.249 |
| P05C | 2005 | 268 | 13 | 8 | 30.258 | P | 0.200 | 0.077  |
| SN43 | 2005 | 268 | 13 | 8 | 30.309 | P | 0.200 | -0.127 |
| HATC | 2005 | 268 | 13 | 8 | 30.389 | P | 0.200 | -0.056 |
| O04C | 2005 | 268 | 13 | 8 | 30.493 | P | 0.200 | -0.094 |
| BFS  | 2005 | 268 | 13 | 8 | 30.542 | P | 0.200 | -0.215 |
| ISA  | 2005 | 268 | 13 | 8 | 30.608 | P | 0.200 | 0.194  |
| EDW2 | 2005 | 268 | 13 | 8 | 30.688 | P | 0.200 | 0.041  |
| SN64 | 2005 | 268 | 13 | 8 | 30.690 | P | 0.200 | -0.083 |
| SN23 | 2005 | 268 | 13 | 8 | 30.728 | P | 0.200 | -0.175 |
| SN54 | 2005 | 268 | 13 | 8 | 30.796 | P | 0.200 | -0.153 |
| R05C | 2005 | 268 | 13 | 8 | 30.941 | P | 0.200 | 0.011  |
| M04C | 2005 | 268 | 13 | 8 | 31.177 | P | 0.200 | 0.116  |
| SN44 | 2005 | 268 | 13 | 8 | 31.237 | P | 0.200 | 0.006  |
| SN86 | 2005 | 268 | 13 | 8 | 31.532 | P | 0.200 | 0.010  |
| SN55 | 2005 | 268 | 13 | 8 | 31.842 | P | 0.200 | -0.187 |
| SN34 | 2005 | 268 | 13 | 8 | 31.969 | P | 0.200 | 0.042  |
| SN24 | 2005 | 268 | 13 | 8 | 32.066 | P | 0.200 | 0.155  |
| SN45 | 2005 | 268 | 13 | 8 | 32.364 | P | 0.200 | -0.015 |
| SN66 | 2005 | 268 | 13 | 8 | 32.447 | P | 0.200 | -0.022 |
| M05C | 2005 | 268 | 13 | 8 | 32.471 | P | 0.200 | -0.073 |
| ELFS | 2005 | 268 | 13 | 8 | 32.617 | P | 0.200 | 0.250  |
| SN56 | 2005 | 268 | 13 | 8 | 32.732 | P | 0.200 | 0.022  |
| R06C | 2005 | 268 | 13 | 8 | 32.843 | P | 0.200 | 0.286  |
| LRL  | 2005 | 268 | 13 | 8 | 33.167 | P | 0.200 | 0.218  |
| SN46 | 2005 | 268 | 13 | 8 | 33.277 | P | 0.200 | -0.062 |
| SN25 | 2005 | 268 | 13 | 8 | 33.291 | P | 0.200 | 0.152  |
| R07C | 2005 | 268 | 13 | 8 | 33.320 | P | 0.200 | 0.084  |
| SN67 | 2005 | 268 | 13 | 8 | 33.351 | P | 0.200 | 0.152  |
| SN15 | 2005 | 268 | 13 | 8 | 33.498 | P | 0.200 | 0.292  |
| CWC  | 2005 | 268 | 13 | 8 | 33.512 | P | 0.200 | -0.010 |
| SN57 | 2005 | 268 | 13 | 8 | 33.697 | P | 0.200 | 0.168  |
| BBR  | 2005 | 268 | 13 | 8 | 33.698 | P | 0.200 | 0.026  |
| SN36 | 2005 | 268 | 13 | 8 | 34.056 | P | 0.200 | 0.210  |
| SN47 | 2005 | 268 | 13 | 8 | 34.091 | P | 0.200 | -0.034 |
| TIN  | 2005 | 268 | 13 | 8 | 34.097 | P | 0.200 | 0.099  |
| RRX  | 2005 | 268 | 13 | 8 | 34.141 | P | 0.200 | -0.047 |
| SN26 | 2005 | 268 | 13 | 8 | 34.389 | P | 0.200 | 0.329  |
| M06C | 2005 | 268 | 13 | 8 | 34.453 | P | 0.200 | 0.076  |
| SN37 | 2005 | 268 | 13 | 8 | 34.556 | P | 0.200 | 0.103  |
| SN16 | 2005 | 268 | 13 | 8 | 34.717 | P | 0.200 | 0.132  |
| MPM  | 2005 | 268 | 13 | 8 | 34.968 | P | 0.200 | 0.225  |
| SN48 | 2005 | 268 | 13 | 8 | 34.980 | P | 0.200 | -0.067 |
| SN38 | 2005 | 268 | 13 | 8 | 35.555 | P | 0.200 | 0.085  |
| S08C | 2005 | 268 | 13 | 8 | 35.586 | P | 0.200 | 0.372  |
| GSC  | 2005 | 268 | 13 | 8 | 35.795 | P | 0.200 | 0.045  |
| SN28 | 2005 | 268 | 13 | 8 | 35.978 | P | 0.200 | 0.148  |
| HEC  | 2005 | 268 | 13 | 8 | 36.469 | P | 0.200 | -0.016 |
| MNV  | 2005 | 268 | 13 | 8 | 36.797 | P | 0.200 | 0.070  |
| GRA  | 2005 | 268 | 13 | 8 | 37.070 | P | 0.200 | 0.286  |
| FUR  | 2005 | 268 | 13 | 8 | 37.650 | P | 0.200 | 0.282  |
| SHO  | 2005 | 268 | 13 | 8 | 38.486 | P | 0.200 | -0.168 |
| TUQ  | 2005 | 268 | 13 | 8 | 39.252 | P | 0.200 | 0.067  |

|      |      |     |   |         |           |           |         |        |       |
|------|------|-----|---|---------|-----------|-----------|---------|--------|-------|
| 2005 | 223  | 9   | 8 | 47.7764 | -22.67700 | 169.50900 | 10.0000 | 11     | 0.001 |
| BNLO | 2005 | 223 | 9 | 21      | 36.262    | P         | 0.200   | 0.099  |       |
| JRSC | 2005 | 223 | 9 | 21      | 36.664    | P         | 0.200   | 0.173  |       |
| HAST | 2005 | 223 | 9 | 21      | 36.696    | P         | 0.200   | 0.342  |       |
| SCZ2 | 2005 | 223 | 9 | 21      | 37.030    | P         | 0.200   | -0.187 |       |
| V03C | 2005 | 223 | 9 | 21      | 37.057    | P         | 0.200   | 0.588  |       |
| V04C | 2005 | 223 | 9 | 21      | 37.104    | P         | 0.200   | 0.175  |       |
| RAMR | 2005 | 223 | 9 | 21      | 37.105    | P         | 0.200   | 0.179  |       |
| BRK  | 2005 | 223 | 9 | 21      | 37.638    | P         | 0.200   | 0.057  |       |

|      |      |     |   |    |        |   |       |        |
|------|------|-----|---|----|--------|---|-------|--------|
| SAO  | 2005 | 223 | 9 | 21 | 37.850 | P | 0.200 | 0.106  |
| BRIB | 2005 | 223 | 9 | 21 | 38.348 | P | 0.200 | 0.361  |
| MHC  | 2005 | 223 | 9 | 21 | 38.841 | P | 0.200 | 0.211  |
| PKD  | 2005 | 223 | 9 | 21 | 38.927 | P | 0.200 | 0.281  |
| WENL | 2005 | 223 | 9 | 21 | 38.947 | P | 0.200 | 0.360  |
| PACP | 2005 | 223 | 9 | 21 | 39.146 | P | 0.200 | 0.276  |
| LGU  | 2005 | 223 | 9 | 21 | 39.187 | P | 0.200 | -0.389 |
| MPP  | 2005 | 223 | 9 | 21 | 39.344 | P | 0.200 | 0.434  |
| SMM  | 2005 | 223 | 9 | 21 | 39.520 | P | 0.200 | 0.299  |
| U04C | 2005 | 223 | 9 | 21 | 39.564 | P | 0.200 | 0.678  |
| JCC  | 2005 | 223 | 9 | 21 | 39.568 | P | 0.200 | 0.270  |
| CIA  | 2005 | 223 | 9 | 21 | 39.875 | P | 0.200 | -0.443 |
| S04C | 2005 | 223 | 9 | 21 | 39.999 | P | 0.200 | 0.190  |
| MNRC | 2005 | 223 | 9 | 21 | 40.110 | P | 0.200 | 0.571  |
| FMP  | 2005 | 223 | 9 | 21 | 41.037 | P | 0.200 | -0.245 |
| V05C | 2005 | 223 | 9 | 21 | 41.412 | P | 0.200 | 0.781  |
| U05C | 2005 | 223 | 9 | 21 | 41.631 | P | 0.200 | 0.706  |
| SUTB | 2005 | 223 | 9 | 21 | 41.813 | P | 0.200 | -0.660 |
| N02C | 2005 | 223 | 9 | 21 | 41.816 | P | 0.200 | 0.269  |
| OSI  | 2005 | 223 | 9 | 21 | 41.902 | P | 0.200 | -0.121 |
| DEC  | 2005 | 223 | 9 | 21 | 41.913 | P | 0.200 | -0.406 |
| S05C | 2005 | 223 | 9 | 21 | 42.348 | P | 0.200 | -0.345 |
| R04C | 2005 | 223 | 9 | 21 | 42.484 | P | 0.200 | -0.203 |
| ARV  | 2005 | 223 | 9 | 21 | 42.551 | P | 0.200 | 0.059  |
| Q04C | 2005 | 223 | 9 | 21 | 42.616 | P | 0.200 | 0.009  |
| SN71 | 2005 | 223 | 9 | 21 | 42.698 | P | 0.200 | -0.256 |
| VES  | 2005 | 223 | 9 | 21 | 42.819 | P | 0.200 | -0.376 |
| O03C | 2005 | 223 | 9 | 21 | 43.193 | P | 0.200 | -0.099 |
| WDC  | 2005 | 223 | 9 | 21 | 43.342 | P | 0.200 | 0.062  |
| RCT  | 2005 | 223 | 9 | 21 | 43.348 | P | 0.200 | -0.479 |
| SN51 | 2005 | 223 | 9 | 21 | 43.411 | P | 0.200 | 0.181  |
| T06C | 2005 | 223 | 9 | 21 | 43.779 | P | 0.200 | -0.198 |
| ORV  | 2005 | 223 | 9 | 21 | 43.879 | P | 0.200 | -0.174 |
| CMB  | 2005 | 223 | 9 | 21 | 43.917 | P | 0.200 | -0.122 |
| SN11 | 2005 | 223 | 9 | 21 | 43.971 | P | 0.200 | -0.402 |
| SN62 | 2005 | 223 | 9 | 21 | 44.059 | P | 0.200 | -0.317 |
| SN52 | 2005 | 223 | 9 | 21 | 44.107 | P | 0.200 | -0.272 |
| SN73 | 2005 | 223 | 9 | 21 | 44.358 | P | 0.200 | -0.168 |
| BFS  | 2005 | 223 | 9 | 21 | 44.381 | P | 0.200 | -0.321 |
| LAVA | 2005 | 223 | 9 | 21 | 44.527 | P | 0.200 | -0.038 |
| SN42 | 2005 | 223 | 9 | 21 | 44.802 | P | 0.200 | -0.105 |
| SN84 | 2005 | 223 | 9 | 21 | 44.866 | P | 0.200 | -0.461 |
| EDW2 | 2005 | 223 | 9 | 21 | 44.915 | P | 0.200 | 0.041  |
| SN95 | 2005 | 223 | 9 | 21 | 44.937 | P | 0.200 | -0.476 |
| SN22 | 2005 | 223 | 9 | 21 | 44.973 | P | 0.200 | -0.294 |
| SN53 | 2005 | 223 | 9 | 21 | 45.002 | P | 0.200 | -0.353 |
| ISA  | 2005 | 223 | 9 | 21 | 45.099 | P | 0.200 | 0.089  |
| SN63 | 2005 | 223 | 9 | 21 | 45.156 | P | 0.200 | -0.291 |
| SN74 | 2005 | 223 | 9 | 21 | 45.209 | P | 0.200 | -0.305 |
| SN43 | 2005 | 223 | 9 | 21 | 45.737 | P | 0.200 | -0.090 |
| YBH  | 2005 | 223 | 9 | 21 | 45.928 | P | 0.200 | 0.371  |
| SN23 | 2005 | 223 | 9 | 21 | 46.005 | P | 0.200 | -0.148 |
| SN85 | 2005 | 223 | 9 | 21 | 46.028 | P | 0.200 | -0.216 |
| M03C | 2005 | 223 | 9 | 21 | 46.084 | P | 0.200 | -0.305 |
| P05C | 2005 | 223 | 9 | 21 | 46.570 | P | 0.200 | 0.184  |
| SN44 | 2005 | 223 | 9 | 21 | 46.650 | P | 0.200 | 0.055  |
| R05C | 2005 | 223 | 9 | 21 | 46.803 | P | 0.200 | -0.059 |
| O05C | 2005 | 223 | 9 | 21 | 46.896 | P | 0.200 | 0.140  |
| O04C | 2005 | 223 | 9 | 21 | 47.217 | P | 0.200 | 0.009  |
| HUMO | 2005 | 223 | 9 | 21 | 47.229 | P | 0.200 | 0.244  |
| HATC | 2005 | 223 | 9 | 21 | 47.240 | P | 0.200 | -0.078 |
| SN24 | 2005 | 223 | 9 | 21 | 47.294 | P | 0.200 | 0.159  |
| SN86 | 2005 | 223 | 9 | 21 | 47.322 | P | 0.200 | -0.007 |

|      |      |     |   |    |        |   |       |        |
|------|------|-----|---|----|--------|---|-------|--------|
| DBO  | 2005 | 223 | 9 | 21 | 47.393 | P | 0.200 | 0.023  |
| BBR  | 2005 | 223 | 9 | 21 | 47.396 | P | 0.200 | -0.108 |
| LRL  | 2005 | 223 | 9 | 21 | 47.435 | P | 0.200 | 0.119  |
| SN45 | 2005 | 223 | 9 | 21 | 47.746 | P | 0.200 | -0.035 |
| SN76 | 2005 | 223 | 9 | 21 | 47.755 | P | 0.200 | -0.196 |
| RRX  | 2005 | 223 | 9 | 21 | 48.018 | P | 0.200 | -0.229 |
| SN66 | 2005 | 223 | 9 | 21 | 48.043 | P | 0.200 | -0.042 |
| CWC  | 2005 | 223 | 9 | 21 | 48.184 | P | 0.200 | -0.142 |
| SN56 | 2005 | 223 | 9 | 21 | 48.226 | P | 0.200 | 0.003  |
| SN25 | 2005 | 223 | 9 | 21 | 48.392 | P | 0.200 | 0.034  |
| M04C | 2005 | 223 | 9 | 21 | 48.545 | P | 0.200 | 0.252  |
| R06C | 2005 | 223 | 9 | 21 | 48.571 | P | 0.200 | 0.262  |
| SN46 | 2005 | 223 | 9 | 21 | 48.706 | P | 0.200 | -0.043 |
| R07C | 2005 | 223 | 9 | 21 | 48.778 | P | 0.200 | 0.013  |
| SN67 | 2005 | 223 | 9 | 21 | 48.892 | P | 0.200 | 0.099  |
| TIN  | 2005 | 223 | 9 | 21 | 49.054 | P | 0.200 | 0.024  |
| SN57 | 2005 | 223 | 9 | 21 | 49.207 | P | 0.200 | 0.157  |
| ELFS | 2005 | 223 | 9 | 21 | 49.210 | P | 0.200 | 0.186  |
| SN36 | 2005 | 223 | 9 | 21 | 49.253 | P | 0.200 | 0.097  |
| M05C | 2005 | 223 | 9 | 21 | 49.423 | P | 0.200 | -0.081 |
| MPM  | 2005 | 223 | 9 | 21 | 49.447 | P | 0.200 | 0.158  |
| SN47 | 2005 | 223 | 9 | 21 | 49.502 | P | 0.200 | -0.058 |
| SN16 | 2005 | 223 | 9 | 21 | 49.778 | P | 0.200 | 0.049  |
| SN37 | 2005 | 223 | 9 | 21 | 49.828 | P | 0.200 | 0.037  |
| GSC  | 2005 | 223 | 9 | 21 | 49.885 | P | 0.200 | -0.013 |
| HEC  | 2005 | 223 | 9 | 21 | 50.256 | P | 0.200 | -0.132 |
| SN48 | 2005 | 223 | 9 | 21 | 50.322 | P | 0.200 | -0.183 |
| S08C | 2005 | 223 | 9 | 21 | 50.732 | P | 0.200 | 0.376  |
| SN38 | 2005 | 223 | 9 | 21 | 50.819 | P | 0.200 | -0.014 |
| SN28 | 2005 | 223 | 9 | 21 | 51.154 | P | 0.200 | 0.032  |
| M06C | 2005 | 223 | 9 | 21 | 51.281 | P | 0.200 | 0.128  |
| GRA  | 2005 | 223 | 9 | 21 | 51.747 | P | 0.200 | 0.122  |
| FUR  | 2005 | 223 | 9 | 21 | 52.054 | P | 0.200 | 0.135  |
| SHO  | 2005 | 223 | 9 | 21 | 52.638 | P | 0.200 | -0.290 |
| TUQ  | 2005 | 223 | 9 | 21 | 53.180 | P | 0.200 | -0.038 |
| TPH  | 2005 | 223 | 9 | 21 | 54.402 | P | 0.200 | -0.146 |
| BMN  | 2005 | 223 | 9 | 21 | 59.330 | P | 0.200 | -0.157 |

|      |      |    |    |         |           |           |         |        |        |
|------|------|----|----|---------|-----------|-----------|---------|--------|--------|
| 2006 | 97   | 8  | 30 | 45.4244 | -16.53700 | 176.98100 | 22.4000 | 116    | -0.006 |
| FARB | 2006 | 97 | 8  | 42      | 42.054    | P         | 0.200   | -0.047 |        |
| SDP  | 2006 | 97 | 8  | 42      | 43.164    | P         | 0.200   | -0.038 |        |
| SNCC | 2006 | 97 | 8  | 42      | 43.663    | P         | 0.200   | 0.142  |        |
| BNLO | 2006 | 97 | 8  | 42      | 43.708    | P         | 0.200   | -0.040 |        |
| MCCM | 2006 | 97 | 8  | 42      | 43.709    | P         | 0.200   | -0.155 |        |
| HAST | 2006 | 97 | 8  | 42      | 44.202    | P         | 0.200   | 0.248  |        |
| JRSC | 2006 | 97 | 8  | 42      | 44.243    | P         | 0.200   | 0.079  |        |
| V04C | 2006 | 97 | 8  | 42      | 44.619    | P         | 0.200   | 0.034  |        |
| V03C | 2006 | 97 | 8  | 42      | 44.680    | P         | 0.200   | 0.586  |        |
| SCZ2 | 2006 | 97 | 8  | 42      | 44.761    | P         | 0.200   | -0.206 |        |
| BRK  | 2006 | 97 | 8  | 42      | 45.458    | P         | 0.200   | 0.014  |        |
| SAO  | 2006 | 97 | 8  | 42      | 45.604    | P         | 0.200   | 0.059  |        |
| CVS  | 2006 | 97 | 8  | 42      | 45.738    | P         | 0.200   | -0.472 |        |
| BKS  | 2006 | 97 | 8  | 42      | 45.760    | P         | 0.200   | 0.116  |        |
| HOPS | 2006 | 97 | 8  | 42      | 45.790    | P         | 0.200   | 0.092  |        |
| SBC  | 2006 | 97 | 8  | 42      | 45.936    | P         | 0.200   | 0.052  |        |
| BRIB | 2006 | 97 | 8  | 42      | 46.142    | P         | 0.200   | 0.213  |        |
| P01C | 2006 | 97 | 8  | 42      | 46.235    | P         | 0.200   | 0.053  |        |
| MHC  | 2006 | 97 | 8  | 42      | 46.744    | P         | 0.200   | 0.186  |        |
| O01C | 2006 | 97 | 8  | 42      | 46.816    | P         | 0.200   | 0.418  |        |
| PKD  | 2006 | 97 | 8  | 42      | 46.836    | P         | 0.200   | 0.237  |        |
| WENL | 2006 | 97 | 8  | 42      | 46.860    | P         | 0.200   | 0.259  |        |
| MPP  | 2006 | 97 | 8  | 42      | 46.997    | P         | 0.200   | 0.117  |        |
| PACP | 2006 | 97 | 8  | 42      | 47.091    | P         | 0.200   | 0.229  |        |

|      |      |    |   |    |        |   |       |        |
|------|------|----|---|----|--------|---|-------|--------|
| LGU  | 2006 | 97 | 8 | 42 | 47.225 | P | 0.200 | -0.417 |
| BDM  | 2006 | 97 | 8 | 42 | 47.499 | P | 0.200 | 0.410  |
| U04C | 2006 | 97 | 8 | 42 | 47.510 | P | 0.200 | 0.611  |
| JCC  | 2006 | 97 | 8 | 42 | 47.959 | P | 0.200 | 0.282  |
| CIA  | 2006 | 97 | 8 | 42 | 48.092 | P | 0.200 | -0.423 |
| S04C | 2006 | 97 | 8 | 42 | 48.127 | P | 0.200 | 0.160  |
| MNRC | 2006 | 97 | 8 | 42 | 48.131 | P | 0.200 | 0.389  |
| Q03C | 2006 | 97 | 8 | 42 | 49.232 | P | 0.200 | 0.811  |
| T05C | 2006 | 97 | 8 | 42 | 49.238 | P | 0.200 | 0.443  |
| FMP  | 2006 | 97 | 8 | 42 | 49.271 | P | 0.200 | -0.400 |
| V05C | 2006 | 97 | 8 | 42 | 49.428 | P | 0.200 | 0.526  |
| U05C | 2006 | 97 | 8 | 42 | 49.808 | P | 0.200 | 0.540  |
| OSI  | 2006 | 97 | 8 | 42 | 50.299 | P | 0.200 | -0.146 |
| SUTB | 2006 | 97 | 8 | 42 | 50.392 | P | 0.200 | -0.741 |
| DEC  | 2006 | 97 | 8 | 42 | 50.400 | P | 0.200 | -0.462 |
| N02C | 2006 | 97 | 8 | 42 | 50.474 | P | 0.200 | 0.228  |
| O02C | 2006 | 97 | 8 | 42 | 50.696 | P | 0.200 | 0.416  |
| S05C | 2006 | 97 | 8 | 42 | 50.906 | P | 0.200 | -0.393 |
| R04C | 2006 | 97 | 8 | 42 | 51.109 | P | 0.200 | -0.267 |
| ARV  | 2006 | 97 | 8 | 42 | 51.115 | P | 0.200 | 0.039  |
| Q04C | 2006 | 97 | 8 | 42 | 51.171 | P | 0.200 | -0.145 |
| SN71 | 2006 | 97 | 8 | 42 | 51.384 | P | 0.200 | -0.250 |
| VES  | 2006 | 97 | 8 | 42 | 51.398 | P | 0.200 | -0.477 |
| SN51 | 2006 | 97 | 8 | 42 | 51.967 | P | 0.200 | 0.022  |
| RCT  | 2006 | 97 | 8 | 42 | 52.010 | P | 0.200 | -0.587 |
| O03C | 2006 | 97 | 8 | 42 | 52.090 | P | 0.200 | -0.098 |
| WDC  | 2006 | 97 | 8 | 42 | 52.271 | P | 0.200 | 0.067  |
| K01A | 2006 | 97 | 8 | 42 | 52.501 | P | 0.200 | 0.528  |
| SN21 | 2006 | 97 | 8 | 42 | 52.502 | P | 0.200 | -0.444 |
| T06C | 2006 | 97 | 8 | 42 | 52.513 | P | 0.200 | -0.239 |
| ORV  | 2006 | 97 | 8 | 42 | 52.725 | P | 0.200 | -0.247 |
| SN11 | 2006 | 97 | 8 | 42 | 52.789 | P | 0.200 | -0.477 |
| CMB  | 2006 | 97 | 8 | 42 | 52.864 | P | 0.200 | -0.031 |
| SN62 | 2006 | 97 | 8 | 42 | 52.917 | P | 0.200 | -0.322 |
| SN52 | 2006 | 97 | 8 | 42 | 52.964 | P | 0.200 | -0.286 |
| SN73 | 2006 | 97 | 8 | 42 | 53.154 | P | 0.200 | -0.278 |
| BFS  | 2006 | 97 | 8 | 42 | 53.325 | P | 0.200 | -0.284 |
| L02A | 2006 | 97 | 8 | 42 | 53.536 | P | 0.200 | 0.376  |
| LAVA | 2006 | 97 | 8 | 42 | 53.542 | P | 0.200 | 0.012  |
| EDW2 | 2006 | 97 | 8 | 42 | 53.735 | P | 0.200 | -0.078 |
| SN22 | 2006 | 97 | 8 | 42 | 53.878 | P | 0.200 | -0.348 |
| ISA  | 2006 | 97 | 8 | 42 | 54.027 | P | 0.200 | 0.071  |
| M02C | 2006 | 97 | 8 | 42 | 54.033 | P | 0.200 | 0.573  |
| SN53 | 2006 | 97 | 8 | 42 | 54.039 | P | 0.200 | -0.304 |
| HELL | 2006 | 97 | 8 | 42 | 54.228 | P | 0.200 | -0.374 |
| S06C | 2006 | 97 | 8 | 42 | 54.277 | P | 0.200 | -0.467 |
| YBH  | 2006 | 97 | 8 | 42 | 55.399 | P | 0.200 | 0.464  |
| M03C | 2006 | 97 | 8 | 42 | 55.442 | P | 0.200 | -0.340 |
| SN54 | 2006 | 97 | 8 | 42 | 55.477 | P | 0.200 | -0.117 |
| P05C | 2006 | 97 | 8 | 42 | 55.659 | P | 0.200 | 0.024  |
| SN44 | 2006 | 97 | 8 | 42 | 55.869 | P | 0.200 | 0.102  |
| O05C | 2006 | 97 | 8 | 42 | 56.262 | P | 0.200 | 0.131  |
| O04C | 2006 | 97 | 8 | 42 | 56.555 | P | 0.200 | -0.095 |
| LRL  | 2006 | 97 | 8 | 42 | 56.600 | P | 0.200 | 0.000  |
| HATC | 2006 | 97 | 8 | 42 | 56.626 | P | 0.200 | -0.166 |
| BBR  | 2006 | 97 | 8 | 42 | 56.631 | P | 0.200 | -0.157 |
| SN55 | 2006 | 97 | 8 | 42 | 56.668 | P | 0.200 | -0.151 |
| J02A | 2006 | 97 | 8 | 42 | 56.824 | P | 0.200 | 0.188  |
| HUMO | 2006 | 97 | 8 | 42 | 56.944 | P | 0.200 | 0.316  |
| DBO  | 2006 | 97 | 8 | 42 | 57.182 | P | 0.200 | 0.033  |
| SN76 | 2006 | 97 | 8 | 42 | 57.226 | P | 0.200 | -0.098 |
| RRX  | 2006 | 97 | 8 | 42 | 57.292 | P | 0.200 | -0.394 |
| CWC  | 2006 | 97 | 8 | 42 | 57.560 | P | 0.200 | -0.132 |

|      |      |    |   |    |        |   |       |        |
|------|------|----|---|----|--------|---|-------|--------|
| SN25 | 2006 | 97 | 8 | 42 | 57.779 | P | 0.200 | 0.030  |
| R06C | 2006 | 97 | 8 | 42 | 57.928 | P | 0.200 | 0.158  |
| SN15 | 2006 | 97 | 8 | 42 | 58.060 | P | 0.200 | 0.264  |
| SN46 | 2006 | 97 | 8 | 42 | 58.099 | P | 0.200 | -0.077 |
| M04C | 2006 | 97 | 8 | 42 | 58.132 | P | 0.200 | 0.101  |
| R07C | 2006 | 97 | 8 | 42 | 58.261 | P | 0.200 | 0.021  |
| SN67 | 2006 | 97 | 8 | 42 | 58.348 | P | 0.200 | 0.035  |
| TIN  | 2006 | 97 | 8 | 42 | 58.559 | P | 0.200 | 0.024  |
| SN57 | 2006 | 97 | 8 | 42 | 58.645 | P | 0.200 | 0.044  |
| ELFS | 2006 | 97 | 8 | 42 | 58.815 | P | 0.200 | 0.076  |
| WCN  | 2006 | 97 | 8 | 42 | 58.940 | P | 0.200 | 0.251  |
| J03A | 2006 | 97 | 8 | 42 | 58.969 | P | 0.200 | 0.420  |
| MPM  | 2006 | 97 | 8 | 42 | 58.984 | P | 0.200 | 0.143  |
| SN26 | 2006 | 97 | 8 | 42 | 59.077 | P | 0.200 | 0.201  |
| SN47 | 2006 | 97 | 8 | 42 | 59.140 | P | 0.200 | 0.000  |
| M05C | 2006 | 97 | 8 | 42 | 59.256 | P | 0.200 | -0.080 |
| SN16 | 2006 | 97 | 8 | 42 | 59.418 | P | 0.200 | 0.110  |
| SN37 | 2006 | 97 | 8 | 42 | 59.442 | P | 0.200 | 0.028  |
| I03A | 2006 | 97 | 8 | 42 | 59.445 | P | 0.200 | 0.022  |
| GSC  | 2006 | 97 | 8 | 42 | 59.524 | P | 0.200 | -0.025 |
| HEC  | 2006 | 97 | 8 | 42 | 59.841 | P | 0.200 | -0.302 |
| SN48 | 2006 | 97 | 8 | 43 | 0.049  | P | 0.200 | -0.188 |
| S08C | 2006 | 97 | 8 | 43 | 0.359  | P | 0.200 | 0.311  |
| O06A | 2006 | 97 | 8 | 43 | 0.577  | P | 0.200 | -0.144 |
| SN38 | 2006 | 97 | 8 | 43 | 0.646  | P | 0.200 | 0.006  |
| SN28 | 2006 | 97 | 8 | 43 | 1.016  | P | 0.200 | 0.060  |
| Q07A | 2006 | 97 | 8 | 43 | 1.126  | P | 0.200 | 0.056  |
| M06C | 2006 | 97 | 8 | 43 | 1.213  | P | 0.200 | -0.002 |
| GRA  | 2006 | 97 | 8 | 43 | 1.726  | P | 0.200 | 0.193  |
| FUR  | 2006 | 97 | 8 | 43 | 2.001  | P | 0.200 | 0.086  |
| R08A | 2006 | 97 | 8 | 43 | 2.096  | P | 0.200 | -0.123 |
| MNV  | 2006 | 97 | 8 | 43 | 2.189  | P | 0.200 | -0.022 |
| P07A | 2006 | 97 | 8 | 43 | 2.387  | P | 0.200 | -0.036 |
| SHO  | 2006 | 97 | 8 | 43 | 2.691  | P | 0.200 | -0.325 |
| TUQ  | 2006 | 97 | 8 | 43 | 3.169  | P | 0.200 | -0.186 |
| O07A | 2006 | 97 | 8 | 43 | 3.881  | P | 0.200 | -0.206 |
| Q08A | 2006 | 97 | 8 | 43 | 3.963  | P | 0.200 | -0.188 |
| N07A | 2006 | 97 | 8 | 43 | 5.176  | P | 0.200 | -0.004 |
| P08A | 2006 | 97 | 8 | 43 | 5.631  | P | 0.200 | -0.106 |
| TPNV | 2006 | 97 | 8 | 43 | 5.701  | P | 0.200 | 0.019  |
| M07A | 2006 | 97 | 8 | 43 | 6.136  | P | 0.200 | -0.061 |
| O08A | 2006 | 97 | 8 | 43 | 6.966  | P | 0.200 | 0.050  |
| N08A | 2006 | 97 | 8 | 43 | 8.172  | P | 0.200 | 0.064  |

|      |      |     |    |         |           |           |          |        |       |
|------|------|-----|----|---------|-----------|-----------|----------|--------|-------|
| 2006 | 219  | 22  | 18 | 54.5966 | -15.77700 | 167.79900 | 140.6000 | 206    | 0.001 |
| FARB | 2006 | 219 | 22 | 31      | 8.297     | P         | 0.200    | -0.271 |       |
| MCCM | 2006 | 219 | 22 | 31      | 9.592     | P         | 0.200    | -0.376 |       |
| BNLO | 2006 | 219 | 22 | 31      | 10.447    | P         | 0.200    | -0.103 |       |
| JRSC | 2006 | 219 | 22 | 31      | 10.830    | P         | 0.200    | 0.065  |       |
| HOPS | 2006 | 219 | 22 | 31      | 11.132    | P         | 0.200    | -0.023 |       |
| O01C | 2006 | 219 | 22 | 31      | 11.372    | P         | 0.200    | 0.364  |       |
| P01C | 2006 | 219 | 22 | 31      | 11.379    | P         | 0.200    | 0.098  |       |
| HAST | 2006 | 219 | 22 | 31      | 11.482    | P         | 0.200    | 0.234  |       |
| BRK  | 2006 | 219 | 22 | 31      | 11.636    | P         | 0.200    | -0.046 |       |
| CVS  | 2006 | 219 | 22 | 31      | 11.673    | P         | 0.200    | -0.441 |       |
| SDP  | 2006 | 219 | 22 | 31      | 11.716    | P         | 0.200    | 0.003  |       |
| BKS  | 2006 | 219 | 22 | 31      | 11.883    | P         | 0.200    | 0.001  |       |
| JCC  | 2006 | 219 | 22 | 31      | 11.997    | P         | 0.200    | 0.218  |       |
| BRIB | 2006 | 219 | 22 | 31      | 12.273    | P         | 0.200    | 0.159  |       |
| V03C | 2006 | 219 | 22 | 31      | 12.296    | P         | 0.200    | 0.660  |       |
| SAO  | 2006 | 219 | 22 | 31      | 12.533    | P         | 0.200    | 0.003  |       |
| RAMR | 2006 | 219 | 22 | 31      | 12.624    | P         | 0.200    | 0.284  |       |
| SNCC | 2006 | 219 | 22 | 31      | 13.019    | P         | 0.200    | 0.182  |       |

|      |      |     |    |    |        |   |       |        |
|------|------|-----|----|----|--------|---|-------|--------|
| WENL | 2006 | 219 | 22 | 31 | 13.273 | P | 0.200 | 0.295  |
| MHC  | 2006 | 219 | 22 | 31 | 13.308 | P | 0.200 | 0.170  |
| PHL  | 2006 | 219 | 22 | 31 | 13.325 | P | 0.200 | 0.224  |
| BDM  | 2006 | 219 | 22 | 31 | 13.520 | P | 0.200 | 0.298  |
| MNRC | 2006 | 219 | 22 | 31 | 13.552 | P | 0.200 | 0.319  |
| SCZ2 | 2006 | 219 | 22 | 31 | 13.636 | P | 0.200 | -0.115 |
| M01C | 2006 | 219 | 22 | 31 | 13.911 | P | 0.200 | 0.313  |
| PACP | 2006 | 219 | 22 | 31 | 13.914 | P | 0.200 | 0.266  |
| PKD  | 2006 | 219 | 22 | 31 | 14.308 | P | 0.200 | 0.224  |
| N02C | 2006 | 219 | 22 | 31 | 14.513 | P | 0.200 | 0.219  |
| S04C | 2006 | 219 | 22 | 31 | 14.527 | P | 0.200 | 0.142  |
| SBC  | 2006 | 219 | 22 | 31 | 14.545 | P | 0.200 | 0.197  |
| GASB | 2006 | 219 | 22 | 31 | 14.638 | P | 0.200 | 0.706  |
| U04C | 2006 | 219 | 22 | 31 | 14.803 | P | 0.200 | 0.688  |
| Q03C | 2006 | 219 | 22 | 31 | 14.898 | P | 0.200 | 0.850  |
| K01A | 2006 | 219 | 22 | 31 | 15.002 | P | 0.200 | 0.458  |
| O02C | 2006 | 219 | 22 | 31 | 15.196 | P | 0.200 | 0.400  |
| MPP  | 2006 | 219 | 22 | 31 | 15.241 | P | 0.200 | 0.201  |
| SMM  | 2006 | 219 | 22 | 31 | 15.339 | P | 0.200 | 0.248  |
| SUTB | 2006 | 219 | 22 | 31 | 15.529 | P | 0.200 | -0.770 |
| LGU  | 2006 | 219 | 22 | 31 | 15.910 | P | 0.200 | -0.327 |
| T05C | 2006 | 219 | 22 | 31 | 16.113 | P | 0.200 | 0.532  |
| SNC3 | 2006 | 219 | 22 | 31 | 17.169 | P | 0.200 | 0.045  |
| WDC  | 2006 | 219 | 22 | 31 | 16.390 | P | 0.200 | 0.004  |
| SN71 | 2006 | 219 | 22 | 31 | 17.461 | P | 0.200 | -0.373 |
| L02A | 2006 | 219 | 22 | 31 | 16.507 | P | 0.200 | 0.298  |
| SNE4 | 2006 | 219 | 22 | 31 | 17.571 | P | 0.200 | -0.137 |
| Q04C | 2006 | 219 | 22 | 31 | 16.611 | P | 0.200 | -0.109 |
| O03C | 2006 | 219 | 22 | 31 | 16.713 | P | 0.200 | -0.060 |
| R04C | 2006 | 219 | 22 | 31 | 16.790 | P | 0.200 | -0.387 |
| TOV  | 2006 | 219 | 22 | 31 | 16.928 | P | 0.200 | -0.221 |
| V05C | 2006 | 219 | 22 | 31 | 17.008 | P | 0.200 | 0.678  |
| CIA  | 2006 | 219 | 22 | 31 | 17.114 | P | 0.200 | -0.372 |
| SNC4 | 2006 | 219 | 22 | 31 | 18.223 | P | 0.200 | -0.154 |
| S05C | 2006 | 219 | 22 | 31 | 17.295 | P | 0.200 | -0.396 |
| SNA3 | 2006 | 219 | 22 | 31 | 18.491 | P | 0.200 | 0.216  |
| M02C | 2006 | 219 | 22 | 31 | 17.550 | P | 0.200 | 0.502  |
| ORV  | 2006 | 219 | 22 | 31 | 17.585 | P | 0.200 | -0.268 |
| SND5 | 2006 | 219 | 22 | 31 | 18.779 | P | 0.200 | -0.355 |
| RPV  | 2006 | 219 | 22 | 31 | 17.883 | P | 0.200 | -0.240 |
| K02A | 2006 | 219 | 22 | 31 | 17.892 | P | 0.200 | 0.108  |
| SNA4 | 2006 | 219 | 22 | 31 | 19.089 | P | 0.200 | -0.109 |
| SN73 | 2006 | 219 | 22 | 31 | 19.106 | P | 0.200 | -0.334 |
| FMP  | 2006 | 219 | 22 | 31 | 18.194 | P | 0.200 | -0.199 |
| DJJ  | 2006 | 219 | 22 | 31 | 18.263 | P | 0.200 | -0.173 |
| SN93 | 2006 | 219 | 22 | 31 | 18.455 | P | 0.200 | 0.287  |
| YBH  | 2006 | 219 | 22 | 31 | 18.545 | P | 0.200 | 0.291  |
| SN84 | 2006 | 219 | 22 | 31 | 19.580 | P | 0.200 | -0.521 |
| OSI  | 2006 | 219 | 22 | 31 | 18.600 | P | 0.200 | -0.016 |
| CMB  | 2006 | 219 | 22 | 31 | 18.644 | P | 0.200 | -0.136 |
| J02A | 2006 | 219 | 22 | 31 | 18.708 | P | 0.200 | -0.029 |
| VES  | 2006 | 219 | 22 | 31 | 18.764 | P | 0.200 | -0.439 |
| LAVA | 2006 | 219 | 22 | 31 | 18.824 | P | 0.200 | -0.108 |
| DEC  | 2006 | 219 | 22 | 31 | 18.940 | P | 0.200 | -0.276 |
| T06C | 2006 | 219 | 22 | 31 | 19.017 | P | 0.200 | -0.299 |
| M03C | 2006 | 219 | 22 | 31 | 19.047 | P | 0.200 | -0.361 |
| ARV  | 2006 | 219 | 22 | 31 | 19.061 | P | 0.200 | 0.167  |
| SNA5 | 2006 | 219 | 22 | 31 | 20.098 | P | 0.200 | -0.309 |
| SN74 | 2006 | 219 | 22 | 31 | 20.106 | P | 0.200 | -0.329 |
| USC  | 2006 | 219 | 22 | 31 | 19.237 | P | 0.200 | 0.385  |
| DBO  | 2006 | 219 | 22 | 31 | 19.341 | P | 0.200 | -0.092 |
| PAS  | 2006 | 219 | 22 | 31 | 19.358 | P | 0.200 | -0.244 |
| SN43 | 2006 | 219 | 22 | 31 | 20.896 | P | 0.200 | -0.207 |



|      |      |     |    |    |        |   |       |        |
|------|------|-----|----|----|--------|---|-------|--------|
| SNB6 | 2006 | 219 | 22 | 31 | 20.929 | P | 0.200 | -0.142 |
| MWC  | 2006 | 219 | 22 | 31 | 20.119 | P | 0.200 | -0.377 |
| S06C | 2006 | 219 | 22 | 31 | 20.200 | P | 0.200 | -0.485 |
| SN64 | 2006 | 219 | 22 | 31 | 21.232 | P | 0.200 | -0.160 |
| SN54 | 2006 | 219 | 22 | 31 | 21.410 | P | 0.200 | -0.177 |
| CHF  | 2006 | 219 | 22 | 31 | 20.440 | P | 0.200 | -0.243 |
| SN23 | 2006 | 219 | 22 | 31 | 21.463 | P | 0.200 | -0.153 |
| HATC | 2006 | 219 | 22 | 31 | 20.473 | P | 0.200 | -0.237 |
| P05C | 2006 | 219 | 22 | 31 | 20.664 | P | 0.200 | 0.040  |
| O05C | 2006 | 219 | 22 | 31 | 20.703 | P | 0.200 | 0.072  |
| O04C | 2006 | 219 | 22 | 31 | 20.843 | P | 0.200 | -0.075 |
| I03A | 2006 | 219 | 22 | 31 | 20.899 | P | 0.200 | -0.141 |
| HELL | 2006 | 219 | 22 | 31 | 20.916 | P | 0.200 | -0.389 |
| SN96 | 2006 | 219 | 22 | 31 | 20.964 | P | 0.200 | -0.224 |
| J03A | 2006 | 219 | 22 | 31 | 20.971 | P | 0.200 | 0.360  |
| M04C | 2006 | 219 | 22 | 31 | 21.326 | P | 0.200 | 0.088  |
| R05C | 2006 | 219 | 22 | 31 | 21.388 | P | 0.200 | -0.071 |
| ISA  | 2006 | 219 | 22 | 31 | 21.418 | P | 0.200 | 0.110  |
| SN55 | 2006 | 219 | 22 | 31 | 22.467 | P | 0.200 | -0.212 |
| SND8 | 2006 | 219 | 22 | 31 | 22.505 | P | 0.200 | -0.042 |
| SN97 | 2006 | 219 | 22 | 31 | 22.578 | P | 0.200 | 0.007  |
| BFS  | 2006 | 219 | 22 | 31 | 21.590 | P | 0.200 | -0.238 |
| SN34 | 2006 | 219 | 22 | 31 | 22.654 | P | 0.200 | 0.019  |
| SN24 | 2006 | 219 | 22 | 31 | 22.717 | P | 0.200 | 0.069  |
| SNA7 | 2006 | 219 | 22 | 31 | 22.751 | P | 0.200 | 0.052  |
| EDW2 | 2006 | 219 | 22 | 31 | 21.754 | P | 0.200 | 0.109  |
| L04A | 2006 | 219 | 22 | 31 | 21.755 | P | 0.200 | -0.173 |
| SN45 | 2006 | 219 | 22 | 31 | 23.077 | P | 0.200 | 0.004  |
| SN56 | 2006 | 219 | 22 | 31 | 23.367 | P | 0.200 | -0.012 |
| BEK  | 2006 | 219 | 22 | 31 | 22.419 | P | 0.200 | -0.219 |
| M05C | 2006 | 219 | 22 | 31 | 22.611 | P | 0.200 | -0.211 |
| SN76 | 2006 | 219 | 22 | 31 | 22.693 | P | 0.200 | -0.149 |
| ELFS | 2006 | 219 | 22 | 31 | 22.739 | P | 0.200 | 0.011  |
| K04A | 2006 | 219 | 22 | 31 | 23.110 | P | 0.200 | -0.250 |
| ADO  | 2006 | 219 | 22 | 31 | 23.179 | P | 0.200 | -0.121 |
| R06C | 2006 | 219 | 22 | 31 | 23.315 | P | 0.200 | 0.145  |
| SVD  | 2006 | 219 | 22 | 31 | 23.738 | P | 0.200 | 0.003  |
| WCN  | 2006 | 219 | 22 | 31 | 23.786 | P | 0.200 | 0.234  |
| P06A | 2006 | 219 | 22 | 31 | 23.818 | P | 0.200 | 0.016  |
| R07C | 2006 | 219 | 22 | 31 | 23.958 | P | 0.200 | 0.049  |
| LRL  | 2006 | 219 | 22 | 31 | 24.120 | P | 0.200 | 0.175  |
| CWC  | 2006 | 219 | 22 | 31 | 24.305 | P | 0.200 | -0.096 |
| M06C | 2006 | 219 | 22 | 31 | 24.657 | P | 0.200 | -0.076 |
| BBR  | 2006 | 219 | 22 | 31 | 24.712 | P | 0.200 | -0.128 |
| O06A | 2006 | 219 | 22 | 31 | 24.776 | P | 0.200 | -0.167 |
| TIN  | 2006 | 219 | 22 | 31 | 24.928 | P | 0.200 | 0.105  |
| RRX  | 2006 | 219 | 22 | 31 | 25.145 | P | 0.200 | -0.140 |
| L05A | 2006 | 219 | 22 | 31 | 25.276 | P | 0.200 | -0.053 |
| N06A | 2006 | 219 | 22 | 31 | 25.851 | P | 0.200 | -0.156 |
| MPM  | 2006 | 219 | 22 | 31 | 25.934 | P | 0.200 | 0.227  |
| Q07A | 2006 | 219 | 22 | 31 | 26.140 | P | 0.200 | 0.083  |
| SLA  | 2006 | 219 | 22 | 31 | 26.176 | P | 0.200 | -0.013 |
| J05A | 2006 | 219 | 22 | 31 | 26.309 | P | 0.200 | 0.013  |
| S08C | 2006 | 219 | 22 | 31 | 26.333 | P | 0.200 | 0.316  |
| GSC  | 2006 | 219 | 22 | 31 | 26.871 | P | 0.200 | 0.042  |
| P07A | 2006 | 219 | 22 | 31 | 26.911 | P | 0.200 | -0.047 |
| R08A | 2006 | 219 | 22 | 31 | 27.424 | P | 0.200 | -0.068 |
| HEC  | 2006 | 219 | 22 | 31 | 27.516 | P | 0.200 | -0.114 |
| GRA  | 2006 | 219 | 22 | 31 | 27.858 | P | 0.200 | 0.190  |
| O07A | 2006 | 219 | 22 | 31 | 27.935 | P | 0.200 | -0.212 |
| FUR  | 2006 | 219 | 22 | 31 | 28.464 | P | 0.200 | 0.135  |
| N07B | 2006 | 219 | 22 | 31 | 28.852 | P | 0.200 | 0.029  |
| Q08A | 2006 | 219 | 22 | 31 | 28.930 | P | 0.200 | -0.093 |

|      |      |     |    |    |        |   |       |        |
|------|------|-----|----|----|--------|---|-------|--------|
| M07A | 2006 | 219 | 22 | 31 | 29.412 | P | 0.200 | 0.032  |
| S09A | 2006 | 219 | 22 | 31 | 29.417 | P | 0.200 | -0.127 |
| SHO  | 2006 | 219 | 22 | 31 | 29.534 | P | 0.200 | -0.163 |
| TPH  | 2006 | 219 | 22 | 31 | 30.031 | P | 0.200 | -0.131 |
| P08A | 2006 | 219 | 22 | 31 | 30.107 | P | 0.200 | 0.088  |
| L07A | 2006 | 219 | 22 | 31 | 30.226 | P | 0.200 | 0.240  |
| TUQ  | 2006 | 219 | 22 | 31 | 30.264 | P | 0.200 | -0.028 |
| U10A | 2006 | 219 | 22 | 31 | 30.667 | P | 0.200 | 0.321  |
| R09A | 2006 | 219 | 22 | 31 | 30.883 | P | 0.200 | -0.140 |
| O08A | 2006 | 219 | 22 | 31 | 30.915 | P | 0.200 | 0.120  |
| Q09A | 2006 | 219 | 22 | 31 | 31.482 | P | 0.200 | -0.019 |
| TPNV | 2006 | 219 | 22 | 31 | 31.689 | P | 0.200 | 0.056  |
| N08A | 2006 | 219 | 22 | 31 | 31.808 | P | 0.200 | 0.198  |
| P09A | 2006 | 219 | 22 | 31 | 32.711 | P | 0.200 | -0.122 |
| V11A | 2006 | 219 | 22 | 31 | 32.789 | P | 0.200 | 0.159  |
| R10A | 2006 | 219 | 22 | 31 | 33.855 | P | 0.200 | 0.161  |
| O09A | 2006 | 219 | 22 | 31 | 33.907 | P | 0.200 | 0.206  |
| U11A | 2006 | 219 | 22 | 31 | 34.011 | P | 0.200 | 0.272  |
| P10A | 2006 | 219 | 22 | 31 | 35.093 | P | 0.200 | -0.270 |
| Q11A | 2006 | 219 | 22 | 31 | 36.838 | P | 0.200 | 0.030  |

|      |     |    |   |         |           |           |          |     |       |
|------|-----|----|---|---------|-----------|-----------|----------|-----|-------|
| 2006 | 276 | 18 | 3 | 15.6107 | -18.86900 | 169.00301 | 171.4000 | 227 | 0.001 |
|------|-----|----|---|---------|-----------|-----------|----------|-----|-------|

|      |      |     |    |    |        |   |       |        |
|------|------|-----|----|----|--------|---|-------|--------|
| FARB | 2006 | 276 | 18 | 15 | 31.989 | P | 0.200 | -0.090 |
| MCCM | 2006 | 276 | 18 | 15 | 33.301 | P | 0.200 | -0.238 |
| BNLO | 2006 | 276 | 18 | 15 | 33.792 | P | 0.200 | -0.028 |
| JRSC | 2006 | 276 | 18 | 15 | 34.190 | P | 0.200 | 0.089  |
| HAST | 2006 | 276 | 18 | 15 | 34.527 | P | 0.200 | 0.259  |
| SNCC | 2006 | 276 | 18 | 15 | 34.834 | P | 0.200 | -0.047 |
| HOPS | 2006 | 276 | 18 | 15 | 35.035 | P | 0.200 | 0.097  |
| V03C | 2006 | 276 | 18 | 15 | 35.067 | P | 0.200 | 0.545  |
| BRK  | 2006 | 276 | 18 | 15 | 35.142 | P | 0.200 | 0.022  |
| RAMR | 2006 | 276 | 18 | 15 | 35.307 | P | 0.200 | 0.203  |
| CVS  | 2006 | 276 | 18 | 15 | 35.353 | P | 0.200 | -0.319 |
| P01C | 2006 | 276 | 18 | 15 | 35.365 | P | 0.200 | 0.166  |
| BKS  | 2006 | 276 | 18 | 15 | 35.435 | P | 0.200 | 0.121  |
| SAO  | 2006 | 276 | 18 | 15 | 35.589 | P | 0.200 | -0.028 |
| O01C | 2006 | 276 | 18 | 15 | 35.661 | P | 0.200 | 0.530  |
| SCZ2 | 2006 | 276 | 18 | 15 | 35.731 | P | 0.200 | -0.239 |
| BRIB | 2006 | 276 | 18 | 15 | 35.820 | P | 0.200 | 0.281  |
| PHL  | 2006 | 276 | 18 | 15 | 35.910 | P | 0.200 | 0.142  |
| JCC  | 2006 | 276 | 18 | 15 | 36.343 | P | 0.200 | 0.285  |
| MHC  | 2006 | 276 | 18 | 15 | 36.510 | P | 0.200 | 0.139  |
| SBC  | 2006 | 276 | 18 | 15 | 36.647 | P | 0.200 | -0.043 |
| WENL | 2006 | 276 | 18 | 15 | 36.649 | P | 0.200 | 0.367  |
| BDM  | 2006 | 276 | 18 | 15 | 36.978 | P | 0.200 | 0.369  |
| PACP | 2006 | 276 | 18 | 15 | 36.993 | P | 0.200 | 0.240  |
| PKD  | 2006 | 276 | 18 | 15 | 37.004 | P | 0.200 | 0.146  |
| MNRC | 2006 | 276 | 18 | 15 | 37.282 | P | 0.200 | 0.385  |
| U04C | 2006 | 276 | 18 | 15 | 37.622 | P | 0.200 | 0.624  |
| MPP  | 2006 | 276 | 18 | 15 | 37.654 | P | 0.200 | 0.181  |
| S04C | 2006 | 276 | 18 | 15 | 37.811 | P | 0.200 | 0.207  |
| SMM  | 2006 | 276 | 18 | 15 | 37.869 | P | 0.200 | 0.214  |
| Q03C | 2006 | 276 | 18 | 15 | 38.511 | P | 0.200 | 0.921  |
| M01C | 2006 | 276 | 18 | 15 | 38.652 | P | 0.200 | 0.578  |
| GASB | 2006 | 276 | 18 | 15 | 38.707 | P | 0.200 | 0.926  |
| N02C | 2006 | 276 | 18 | 15 | 38.739 | P | 0.200 | 0.288  |
| TOV  | 2006 | 276 | 18 | 15 | 38.830 | P | 0.200 | -0.448 |
| CIA  | 2006 | 276 | 18 | 15 | 38.843 | P | 0.200 | -0.568 |
| T05C | 2006 | 276 | 18 | 15 | 39.171 | P | 0.200 | 0.592  |
| SUTB | 2006 | 276 | 18 | 15 | 39.313 | P | 0.200 | -0.600 |
| O02C | 2006 | 276 | 18 | 15 | 39.371 | P | 0.200 | 0.614  |
| K01A | 2006 | 276 | 18 | 15 | 39.659 | P | 0.200 | 0.430  |
| V05C | 2006 | 276 | 18 | 15 | 39.686 | P | 0.200 | 0.690  |

|      |      |     |    |    |        |   |       |        |
|------|------|-----|----|----|--------|---|-------|--------|
| U05C | 2006 | 276 | 18 | 15 | 39.730 | P | 0.200 | 0.553  |
| SNB3 | 2006 | 276 | 18 | 15 | 40.878 | P | 0.200 | -0.265 |
| FMP  | 2006 | 276 | 18 | 15 | 39.917 | P | 0.200 | -0.440 |
| DJJ  | 2006 | 276 | 18 | 15 | 39.992 | P | 0.200 | -0.510 |
| R04C | 2006 | 276 | 18 | 15 | 40.098 | P | 0.200 | -0.354 |
| Q04C | 2006 | 276 | 18 | 15 | 40.103 | P | 0.200 | -0.089 |
| SNE4 | 2006 | 276 | 18 | 15 | 41.174 | P | 0.200 | -0.076 |
| S05C | 2006 | 276 | 18 | 15 | 40.429 | P | 0.200 | -0.291 |
| WDC  | 2006 | 276 | 18 | 15 | 40.491 | P | 0.200 | 0.118  |
| SNG5 | 2006 | 276 | 18 | 15 | 41.494 | P | 0.200 | -0.254 |
| SNC4 | 2006 | 276 | 18 | 15 | 41.535 | P | 0.200 | -0.231 |
| O03C | 2006 | 276 | 18 | 15 | 40.573 | P | 0.200 | 0.005  |
| OSI  | 2006 | 276 | 18 | 15 | 40.628 | P | 0.200 | -0.210 |
| DEC  | 2006 | 276 | 18 | 15 | 40.676 | P | 0.200 | -0.609 |
| SNA3 | 2006 | 276 | 18 | 15 | 41.777 | P | 0.200 | 0.224  |
| L02A | 2006 | 276 | 18 | 15 | 40.954 | P | 0.200 | 0.302  |
| VES  | 2006 | 276 | 18 | 15 | 41.090 | P | 0.200 | -0.631 |
| PAS  | 2006 | 276 | 18 | 15 | 41.093 | P | 0.200 | -0.535 |
| ARV  | 2006 | 276 | 18 | 15 | 41.156 | P | 0.200 | -0.060 |
| SND5 | 2006 | 276 | 18 | 15 | 42.244 | P | 0.200 | -0.339 |
| SNE5 | 2006 | 276 | 18 | 15 | 42.248 | P | 0.200 | -0.136 |
| ORV  | 2006 | 276 | 18 | 15 | 41.269 | P | 0.200 | -0.216 |
| SND4 | 2006 | 276 | 18 | 15 | 41.321 | P | 0.200 | -0.205 |
| SNA4 | 2006 | 276 | 18 | 15 | 42.412 | P | 0.200 | -0.051 |
| SNC5 | 2006 | 276 | 18 | 15 | 42.419 | P | 0.200 | -0.473 |
| RCT  | 2006 | 276 | 18 | 15 | 41.551 | P | 0.200 | -0.687 |
| SN93 | 2006 | 276 | 18 | 15 | 41.682 | P | 0.200 | 0.311  |
| CMB  | 2006 | 276 | 18 | 15 | 41.758 | P | 0.200 | -0.181 |
| T06C | 2006 | 276 | 18 | 15 | 41.772 | P | 0.200 | -0.402 |
| M02C | 2006 | 276 | 18 | 15 | 41.838 | P | 0.200 | 0.619  |
| SNB5 | 2006 | 276 | 18 | 15 | 42.888 | P | 0.200 | -0.298 |
| MWC  | 2006 | 276 | 18 | 15 | 41.947 | P | 0.200 | -0.564 |
| LAVA | 2006 | 276 | 18 | 15 | 42.079 | P | 0.200 | -0.193 |
| SNF6 | 2006 | 276 | 18 | 15 | 43.176 | P | 0.200 | -0.156 |
| CHF  | 2006 | 276 | 18 | 15 | 42.183 | P | 0.200 | -0.524 |
| VCS  | 2006 | 276 | 18 | 15 | 42.210 | P | 0.200 | -0.341 |
| SNE6 | 2006 | 276 | 18 | 15 | 43.484 | P | 0.200 | -0.234 |
| K02A | 2006 | 276 | 18 | 15 | 42.506 | P | 0.200 | 0.227  |
| SN43 | 2006 | 276 | 18 | 15 | 43.780 | P | 0.200 | -0.192 |
| YBH  | 2006 | 276 | 18 | 15 | 42.905 | P | 0.200 | 0.462  |
| SNC6 | 2006 | 276 | 18 | 15 | 43.993 | P | 0.200 | -0.114 |
| BFS  | 2006 | 276 | 18 | 15 | 43.148 | P | 0.200 | -0.630 |
| S06C | 2006 | 276 | 18 | 15 | 43.235 | P | 0.200 | -0.485 |
| M03C | 2006 | 276 | 18 | 15 | 43.324 | P | 0.200 | -0.105 |
| HELL | 2006 | 276 | 18 | 15 | 43.433 | P | 0.200 | -0.520 |
| J02A | 2006 | 276 | 18 | 15 | 43.573 | P | 0.200 | 0.225  |
| ISA  | 2006 | 276 | 18 | 15 | 43.645 | P | 0.200 | -0.027 |
| EDW2 | 2006 | 276 | 18 | 15 | 43.696 | P | 0.200 | -0.071 |
| SNE7 | 2006 | 276 | 18 | 15 | 44.763 | P | 0.200 | -0.008 |
| SND7 | 2006 | 276 | 18 | 15 | 44.875 | P | 0.200 | 0.106  |
| SNB7 | 2006 | 276 | 18 | 15 | 44.933 | P | 0.200 | -0.213 |
| SNC7 | 2006 | 276 | 18 | 15 | 45.027 | P | 0.200 | 0.201  |
| DBO  | 2006 | 276 | 18 | 15 | 44.058 | P | 0.200 | 0.119  |
| P05C | 2006 | 276 | 18 | 15 | 44.185 | P | 0.200 | 0.164  |
| SN96 | 2006 | 276 | 18 | 15 | 44.188 | P | 0.200 | -0.172 |
| O05C | 2006 | 276 | 18 | 15 | 44.342 | P | 0.200 | 0.138  |
| SN55 | 2006 | 276 | 18 | 15 | 45.408 | P | 0.200 | -0.203 |
| HATC | 2006 | 276 | 18 | 15 | 44.553 | P | 0.200 | 0.022  |
| R05C | 2006 | 276 | 18 | 15 | 44.608 | P | 0.200 | -0.059 |
| O04C | 2006 | 276 | 18 | 15 | 44.623 | P | 0.200 | 0.048  |
| SN97 | 2006 | 276 | 18 | 15 | 45.819 | P | 0.200 | 0.070  |
| SNA7 | 2006 | 276 | 18 | 15 | 45.993 | P | 0.200 | 0.060  |
| ADO  | 2006 | 276 | 18 | 15 | 45.011 | P | 0.200 | -0.266 |

|      |      |     |    |    |        |   |       |        |
|------|------|-----|----|----|--------|---|-------|--------|
| VTV  | 2006 | 276 | 18 | 15 | 45.048 | P | 0.200 | -0.450 |
| SND8 | 2006 | 276 | 18 | 15 | 46.068 | P | 0.200 | 0.130  |
| SVD  | 2006 | 276 | 18 | 15 | 45.376 | P | 0.200 | -0.180 |
| M04C | 2006 | 276 | 18 | 15 | 45.479 | P | 0.200 | 0.204  |
| J03A | 2006 | 276 | 18 | 15 | 45.623 | P | 0.200 | 0.520  |
| I03A | 2006 | 276 | 18 | 15 | 45.696 | P | 0.200 | 0.016  |
| BEK  | 2006 | 276 | 18 | 15 | 45.942 | P | 0.200 | -0.156 |
| L04A | 2006 | 276 | 18 | 15 | 46.081 | P | 0.200 | 0.051  |
| SNA8 | 2006 | 276 | 18 | 15 | 47.086 | P | 0.200 | 0.157  |
| BBR  | 2006 | 276 | 18 | 15 | 46.259 | P | 0.200 | -0.404 |
| R06C | 2006 | 276 | 18 | 15 | 46.495 | P | 0.200 | 0.267  |
| M05C | 2006 | 276 | 18 | 15 | 46.625 | P | 0.200 | -0.040 |
| ELFS | 2006 | 276 | 18 | 15 | 46.656 | P | 0.200 | 0.278  |
| CWC  | 2006 | 276 | 18 | 15 | 46.669 | P | 0.200 | -0.185 |
| MLAC | 2006 | 276 | 18 | 15 | 46.810 | P | 0.200 | 0.230  |
| R07C | 2006 | 276 | 18 | 15 | 46.843 | P | 0.200 | 0.010  |
| RRX  | 2006 | 276 | 18 | 15 | 46.935 | P | 0.200 | -0.326 |
| WCN  | 2006 | 276 | 18 | 15 | 47.110 | P | 0.200 | 0.308  |
| P06A | 2006 | 276 | 18 | 15 | 47.335 | P | 0.200 | 0.181  |
| TIN  | 2006 | 276 | 18 | 15 | 47.440 | P | 0.200 | 0.024  |
| K04A | 2006 | 276 | 18 | 15 | 47.533 | P | 0.200 | 0.015  |
| MPM  | 2006 | 276 | 18 | 15 | 48.041 | P | 0.200 | 0.042  |
| SLA  | 2006 | 276 | 18 | 15 | 48.272 | P | 0.200 | -0.156 |
| O06A | 2006 | 276 | 18 | 15 | 48.328 | P | 0.200 | -0.040 |
| M06C | 2006 | 276 | 18 | 15 | 48.546 | P | 0.200 | 0.098  |
| GSC  | 2006 | 276 | 18 | 15 | 48.681 | P | 0.200 | -0.185 |
| S08C | 2006 | 276 | 18 | 15 | 48.931 | P | 0.200 | 0.247  |
| Q07A | 2006 | 276 | 18 | 15 | 49.216 | P | 0.200 | 0.111  |
| HEC  | 2006 | 276 | 18 | 15 | 49.268 | P | 0.200 | -0.243 |
| L05A | 2006 | 276 | 18 | 15 | 49.473 | P | 0.200 | 0.214  |
| N06A | 2006 | 276 | 18 | 15 | 49.520 | P | 0.200 | -0.029 |
| GRA  | 2006 | 276 | 18 | 15 | 50.154 | P | 0.200 | 0.012  |
| R08A | 2006 | 276 | 18 | 15 | 50.194 | P | 0.200 | -0.151 |
| P07A | 2006 | 276 | 18 | 15 | 50.222 | P | 0.200 | 0.067  |
| FUR  | 2006 | 276 | 18 | 15 | 50.637 | P | 0.200 | 0.019  |
| K05A | 2006 | 276 | 18 | 15 | 50.686 | P | 0.200 | 0.269  |
| J05A | 2006 | 276 | 18 | 15 | 50.741 | P | 0.200 | 0.235  |
| O07A | 2006 | 276 | 18 | 15 | 51.373 | P | 0.200 | -0.089 |
| Q08A | 2006 | 276 | 18 | 15 | 51.689 | P | 0.200 | -0.275 |
| S09A | 2006 | 276 | 18 | 15 | 51.854 | P | 0.200 | -0.289 |
| TUQ  | 2006 | 276 | 18 | 15 | 52.056 | P | 0.200 | -0.198 |
| N07B | 2006 | 276 | 18 | 15 | 52.378 | P | 0.200 | 0.110  |
| TPH  | 2006 | 276 | 18 | 15 | 52.694 | P | 0.200 | -0.150 |
| U10A | 2006 | 276 | 18 | 15 | 52.822 | P | 0.200 | 0.240  |
| M07A | 2006 | 276 | 18 | 15 | 53.135 | P | 0.200 | 0.158  |
| P08A | 2006 | 276 | 18 | 15 | 53.259 | P | 0.200 | 0.110  |
| R09A | 2006 | 276 | 18 | 15 | 53.466 | P | 0.200 | -0.254 |
| L07A | 2006 | 276 | 18 | 15 | 54.046 | P | 0.200 | 0.316  |
| O08A | 2006 | 276 | 18 | 15 | 54.201 | P | 0.200 | 0.165  |
| Q09A | 2006 | 276 | 18 | 15 | 54.305 | P | 0.200 | -0.028 |
| V11A | 2006 | 276 | 18 | 15 | 54.470 | P | 0.200 | -0.166 |
| N08A | 2006 | 276 | 18 | 15 | 55.044 | P | 0.200 | 0.084  |
| P09A | 2006 | 276 | 18 | 15 | 55.684 | P | 0.200 | -0.144 |
| U11A | 2006 | 276 | 18 | 15 | 55.969 | P | 0.200 | 0.083  |
| R10A | 2006 | 276 | 18 | 15 | 56.419 | P | 0.200 | 0.077  |
| O09A | 2006 | 276 | 18 | 15 | 56.918 | P | 0.200 | 0.096  |
| BMN  | 2006 | 276 | 18 | 15 | 57.274 | P | 0.200 | -0.015 |
| P10A | 2006 | 276 | 18 | 15 | 58.064 | P | 0.200 | -0.249 |
| Q11A | 2006 | 276 | 18 | 15 | 59.411 | P | 0.200 | -0.097 |

|      |      |    |    |        |           |           |         |        |
|------|------|----|----|--------|-----------|-----------|---------|--------|
| 2007 | 84   | 0  | 40 | 2.8313 | -20.61700 | 169.35699 | 34.0000 |        |
| FARB | 2007 | 84 | 0  | 52     | 39.765    | P         | 0.200   | -0.064 |
| MCCM | 2007 | 84 | 0  | 52     | 41.213    | P         | 0.200   | -0.110 |

319 0.001

|      |      |    |   |    |        |   |       |        |
|------|------|----|---|----|--------|---|-------|--------|
| BNLO | 2007 | 84 | 0 | 52 | 41.503 | P | 0.200 | 0.045  |
| JRSC | 2007 | 84 | 0 | 52 | 41.882 | P | 0.200 | 0.119  |
| SNCC | 2007 | 84 | 0 | 52 | 41.997 | P | 0.200 | 0.074  |
| HAST | 2007 | 84 | 0 | 52 | 42.118 | P | 0.200 | 0.334  |
| V03C | 2007 | 84 | 0 | 52 | 42.597 | P | 0.200 | 0.619  |
| V04C | 2007 | 84 | 0 | 52 | 42.721 | P | 0.200 | 0.214  |
| BRK  | 2007 | 84 | 0 | 52 | 42.832 | P | 0.200 | -0.003 |
| SCZ2 | 2007 | 84 | 0 | 52 | 42.883 | P | 0.200 | -0.211 |
| HOPS | 2007 | 84 | 0 | 52 | 42.991 | P | 0.200 | 0.169  |
| CVS  | 2007 | 84 | 0 | 52 | 43.102 | P | 0.200 | -0.359 |
| BKS  | 2007 | 84 | 0 | 52 | 43.123 | P | 0.200 | 0.095  |
| SAO  | 2007 | 84 | 0 | 52 | 43.210 | P | 0.200 | 0.041  |
| PHL  | 2007 | 84 | 0 | 52 | 43.327 | P | 0.200 | 0.207  |
| P01C | 2007 | 84 | 0 | 52 | 43.334 | P | 0.200 | 0.187  |
| BRIB | 2007 | 84 | 0 | 52 | 43.506 | P | 0.200 | 0.248  |
| O01C | 2007 | 84 | 0 | 52 | 43.676 | P | 0.200 | 0.503  |
| SBC  | 2007 | 84 | 0 | 52 | 43.953 | P | 0.200 | 0.073  |
| MHC  | 2007 | 84 | 0 | 52 | 44.152 | P | 0.200 | 0.153  |
| WENL | 2007 | 84 | 0 | 52 | 44.276 | P | 0.200 | 0.348  |
| JCC  | 2007 | 84 | 0 | 52 | 44.432 | P | 0.200 | 0.260  |
| PACP | 2007 | 84 | 0 | 52 | 44.575 | P | 0.200 | 0.267  |
| BDM  | 2007 | 84 | 0 | 52 | 44.745 | P | 0.200 | 0.445  |
| MPP  | 2007 | 84 | 0 | 52 | 45.012 | P | 0.200 | 0.312  |
| LGU  | 2007 | 84 | 0 | 52 | 45.063 | P | 0.200 | -0.442 |
| U04C | 2007 | 84 | 0 | 52 | 45.102 | P | 0.200 | 0.657  |
| MNRC | 2007 | 84 | 0 | 52 | 45.178 | P | 0.200 | 0.459  |
| SMM  | 2007 | 84 | 0 | 52 | 45.184 | P | 0.200 | 0.246  |
| S04C | 2007 | 84 | 0 | 52 | 45.392 | P | 0.200 | 0.180  |
| CIA  | 2007 | 84 | 0 | 52 | 45.839 | P | 0.200 | -0.551 |
| Q03C | 2007 | 84 | 0 | 52 | 46.350 | P | 0.200 | 0.998  |
| T05C | 2007 | 84 | 0 | 52 | 46.542 | P | 0.200 | 0.467  |
| GASB | 2007 | 84 | 0 | 52 | 46.591 | P | 0.200 | 0.913  |
| RPV  | 2007 | 84 | 0 | 52 | 46.709 | P | 0.200 | -0.415 |
| N02C | 2007 | 84 | 0 | 52 | 46.813 | P | 0.200 | 0.304  |
| M01C | 2007 | 84 | 0 | 52 | 46.823 | P | 0.200 | 0.546  |
| V05C | 2007 | 84 | 0 | 52 | 46.946 | P | 0.200 | 0.613  |
| FMP  | 2007 | 84 | 0 | 52 | 46.983 | P | 0.200 | -0.371 |
| SUTB | 2007 | 84 | 0 | 52 | 47.026 | P | 0.200 | -0.689 |
| U05C | 2007 | 84 | 0 | 52 | 47.151 | P | 0.200 | 0.578  |
| O02C | 2007 | 84 | 0 | 52 | 47.250 | P | 0.200 | 0.530  |
| DJJ  | 2007 | 84 | 0 | 52 | 47.260 | P | 0.200 | -0.296 |
| R04C | 2007 | 84 | 0 | 52 | 47.807 | P | 0.200 | -0.283 |
| Q04C | 2007 | 84 | 0 | 52 | 47.849 | P | 0.200 | -0.073 |
| DEC  | 2007 | 84 | 0 | 52 | 47.851 | P | 0.200 | -0.482 |
| S05C | 2007 | 84 | 0 | 52 | 47.858 | P | 0.200 | -0.366 |
| OSI  | 2007 | 84 | 0 | 52 | 47.868 | P | 0.200 | -0.090 |
| K01A | 2007 | 84 | 0 | 52 | 48.075 | P | 0.200 | 0.548  |
| USC  | 2007 | 84 | 0 | 52 | 48.266 | P | 0.200 | 0.370  |
| SNC3 | 2007 | 84 | 0 | 52 | 48.323 | P | 0.200 | 0.076  |
| PASC | 2007 | 84 | 0 | 52 | 48.345 | P | 0.200 | -0.447 |
| WDC  | 2007 | 84 | 0 | 52 | 48.377 | P | 0.200 | 0.039  |
| ARV  | 2007 | 84 | 0 | 52 | 48.406 | P | 0.200 | 0.025  |
| O03C | 2007 | 84 | 0 | 52 | 48.470 | P | 0.200 | 0.026  |
| SNB3 | 2007 | 84 | 0 | 52 | 48.619 | P | 0.200 | -0.193 |
| SNE4 | 2007 | 84 | 0 | 52 | 48.903 | P | 0.200 | -0.098 |
| RCT  | 2007 | 84 | 0 | 52 | 48.951 | P | 0.200 | -0.598 |
| MWC  | 2007 | 84 | 0 | 52 | 49.000 | P | 0.200 | -0.535 |
| SND4 | 2007 | 84 | 0 | 52 | 49.119 | P | 0.200 | -0.132 |
| ORV  | 2007 | 84 | 0 | 52 | 49.139 | P | 0.200 | -0.141 |
| SDD  | 2007 | 84 | 0 | 52 | 49.224 | P | 0.200 | 0.080  |
| SN93 | 2007 | 84 | 0 | 52 | 49.257 | P | 0.200 | 0.297  |
| T06C | 2007 | 84 | 0 | 52 | 49.274 | P | 0.200 | -0.319 |
| CHF  | 2007 | 84 | 0 | 52 | 49.297 | P | 0.200 | -0.430 |

|      |      |    |   |    |        |   |       |        |
|------|------|----|---|----|--------|---|-------|--------|
| L02A | 2007 | 84 | 0 | 52 | 49.300 | P | 0.200 | 0.475  |
| VCS  | 2007 | 84 | 0 | 52 | 49.345 | P | 0.200 | -0.249 |
| SNC4 | 2007 | 84 | 0 | 52 | 49.351 | P | 0.200 | -0.090 |
| SNG5 | 2007 | 84 | 0 | 52 | 49.381 | P | 0.200 | -0.170 |
| CMB  | 2007 | 84 | 0 | 52 | 49.408 | P | 0.200 | -0.095 |
| SNA3 | 2007 | 84 | 0 | 52 | 49.482 | P | 0.200 | 0.306  |
| M02C | 2007 | 84 | 0 | 52 | 49.866 | P | 0.200 | 0.602  |
| LAVA | 2007 | 84 | 0 | 52 | 49.872 | P | 0.200 | -0.058 |
| SNE5 | 2007 | 84 | 0 | 52 | 49.979 | P | 0.200 | -0.150 |
| SND5 | 2007 | 84 | 0 | 52 | 49.992 | P | 0.200 | -0.292 |
| SNA4 | 2007 | 84 | 0 | 52 | 50.017 | P | 0.200 | -0.063 |
| SNC5 | 2007 | 84 | 0 | 52 | 50.189 | P | 0.200 | -0.380 |
| SN84 | 2007 | 84 | 0 | 52 | 50.265 | P | 0.200 | -0.527 |
| BFS  | 2007 | 84 | 0 | 52 | 50.329 | P | 0.200 | -0.438 |
| SN95 | 2007 | 84 | 0 | 52 | 50.461 | P | 0.200 | -0.393 |
| SN63 | 2007 | 84 | 0 | 52 | 50.724 | P | 0.200 | -0.257 |
| SN74 | 2007 | 84 | 0 | 52 | 50.741 | P | 0.200 | -0.275 |
| K02A | 2007 | 84 | 0 | 52 | 50.746 | P | 0.200 | 0.269  |
| EDW2 | 2007 | 84 | 0 | 52 | 50.817 | P | 0.200 | -0.033 |
| HELL | 2007 | 84 | 0 | 52 | 50.859 | P | 0.200 | -0.433 |
| YBH  | 2007 | 84 | 0 | 52 | 50.904 | P | 0.200 | 0.404  |
| SNF6 | 2007 | 84 | 0 | 52 | 50.932 | P | 0.200 | -0.166 |
| ISA  | 2007 | 84 | 0 | 52 | 50.980 | P | 0.200 | 0.113  |
| SNA5 | 2007 | 84 | 0 | 52 | 51.060 | P | 0.200 | -0.212 |
| M03C | 2007 | 84 | 0 | 52 | 51.144 | P | 0.200 | -0.269 |
| SN43 | 2007 | 84 | 0 | 52 | 51.260 | P | 0.200 | -0.156 |
| SNE6 | 2007 | 84 | 0 | 52 | 51.305 | P | 0.200 | -0.148 |
| SN85 | 2007 | 84 | 0 | 52 | 51.480 | P | 0.200 | -0.233 |
| SNG7 | 2007 | 84 | 0 | 52 | 51.543 | P | 0.200 | -0.225 |
| SNC6 | 2007 | 84 | 0 | 52 | 51.652 | P | 0.200 | -0.128 |
| SN64 | 2007 | 84 | 0 | 52 | 51.763 | P | 0.200 | -0.108 |
| SN96 | 2007 | 84 | 0 | 52 | 51.811 | P | 0.200 | -0.140 |
| J02A | 2007 | 84 | 0 | 52 | 51.820 | P | 0.200 | 0.213  |
| P05C | 2007 | 84 | 0 | 52 | 51.874 | P | 0.200 | 0.158  |
| SNB6 | 2007 | 84 | 0 | 52 | 51.942 | P | 0.200 | -0.039 |
| ADO  | 2007 | 84 | 0 | 52 | 52.063 | P | 0.200 | -0.233 |
| HUMO | 2007 | 84 | 0 | 52 | 52.113 | P | 0.200 | 0.280  |
| SN75 | 2007 | 84 | 0 | 52 | 52.121 | P | 0.200 | -0.337 |
| O05C | 2007 | 84 | 0 | 52 | 52.165 | P | 0.200 | 0.172  |
| VTV  | 2007 | 84 | 0 | 52 | 52.196 | P | 0.200 | -0.313 |
| DBO  | 2007 | 84 | 0 | 52 | 52.214 | P | 0.200 | 0.058  |
| R05C | 2007 | 84 | 0 | 52 | 52.255 | P | 0.200 | -0.029 |
| HATC | 2007 | 84 | 0 | 52 | 52.291 | P | 0.200 | -0.141 |
| SVD  | 2007 | 84 | 0 | 52 | 52.360 | P | 0.200 | -0.150 |
| O04C | 2007 | 84 | 0 | 52 | 52.440 | P | 0.200 | 0.036  |
| SNE7 | 2007 | 84 | 0 | 52 | 52.608 | P | 0.200 | 0.075  |
| SND7 | 2007 | 84 | 0 | 52 | 52.644 | P | 0.200 | 0.145  |
| SNC7 | 2007 | 84 | 0 | 52 | 52.654 | P | 0.200 | 0.129  |
| SN65 | 2007 | 84 | 0 | 52 | 52.658 | P | 0.200 | -0.172 |
| SNB7 | 2007 | 84 | 0 | 52 | 52.720 | P | 0.200 | -0.081 |
| SN34 | 2007 | 84 | 0 | 52 | 52.861 | P | 0.200 | 0.005  |
| SN55 | 2007 | 84 | 0 | 52 | 52.928 | P | 0.200 | -0.165 |
| SNF8 | 2007 | 84 | 0 | 52 | 53.249 | P | 0.200 | -0.152 |
| LRL  | 2007 | 84 | 0 | 52 | 53.348 | P | 0.200 | 0.093  |
| SN97 | 2007 | 84 | 0 | 52 | 53.362 | P | 0.200 | 0.001  |
| SN14 | 2007 | 84 | 0 | 52 | 53.379 | P | 0.200 | 0.068  |
| M04C | 2007 | 84 | 0 | 52 | 53.431 | P | 0.200 | 0.135  |
| BBR  | 2007 | 84 | 0 | 52 | 53.500 | P | 0.200 | -0.123 |
| BEK  | 2007 | 84 | 0 | 52 | 53.673 | P | 0.200 | -0.180 |
| SNA7 | 2007 | 84 | 0 | 52 | 53.711 | P | 0.200 | 0.143  |
| SND8 | 2007 | 84 | 0 | 52 | 53.720 | P | 0.200 | 0.059  |
| J03A | 2007 | 84 | 0 | 52 | 53.835 | P | 0.200 | 0.505  |
| I03A | 2007 | 84 | 0 | 52 | 53.880 | P | 0.200 | -0.102 |

|      |      |    |   |    |        |   |       |        |
|------|------|----|---|----|--------|---|-------|--------|
| RRX  | 2007 | 84 | 0 | 52 | 53.999 | P | 0.200 | -0.288 |
| CWC  | 2007 | 84 | 0 | 52 | 54.015 | P | 0.200 | -0.106 |
| R06C | 2007 | 84 | 0 | 52 | 54.038 | P | 0.200 | 0.248  |
| L04A | 2007 | 84 | 0 | 52 | 54.072 | P | 0.200 | -0.011 |
| SNC8 | 2007 | 84 | 0 | 52 | 54.114 | P | 0.200 | -0.084 |
| SNF9 | 2007 | 84 | 0 | 52 | 54.147 | P | 0.200 | -0.115 |
| MLAC | 2007 | 84 | 0 | 52 | 54.276 | P | 0.200 | 0.262  |
| ELFS | 2007 | 84 | 0 | 52 | 54.332 | P | 0.200 | 0.112  |
| R07C | 2007 | 84 | 0 | 52 | 54.368 | P | 0.200 | 0.047  |
| M05C | 2007 | 84 | 0 | 52 | 54.447 | P | 0.200 | -0.156 |
| SN98 | 2007 | 84 | 0 | 52 | 54.657 | P | 0.200 | -0.101 |
| SNE9 | 2007 | 84 | 0 | 52 | 54.665 | P | 0.200 | -0.187 |
| SNA8 | 2007 | 84 | 0 | 52 | 54.697 | P | 0.200 | 0.140  |
| WCN  | 2007 | 84 | 0 | 52 | 54.750 | P | 0.200 | 0.288  |
| TIN  | 2007 | 84 | 0 | 52 | 54.760 | P | 0.200 | 0.013  |
| P06A | 2007 | 84 | 0 | 52 | 54.921 | P | 0.200 | 0.066  |
| SND9 | 2007 | 84 | 0 | 52 | 54.941 | P | 0.200 | 0.020  |
| MPM  | 2007 | 84 | 0 | 52 | 55.313 | P | 0.200 | 0.134  |
| SNB9 | 2007 | 84 | 0 | 52 | 55.355 | P | 0.200 | 0.136  |
| K04A | 2007 | 84 | 0 | 52 | 55.507 | P | 0.200 | -0.094 |
| I04A | 2007 | 84 | 0 | 52 | 55.745 | P | 0.200 | -0.343 |
| GSC  | 2007 | 84 | 0 | 52 | 55.833 | P | 0.200 | -0.088 |
| J04A | 2007 | 84 | 0 | 52 | 55.861 | P | 0.200 | -0.110 |
| O06A | 2007 | 84 | 0 | 52 | 56.010 | P | 0.200 | -0.093 |
| HEC  | 2007 | 84 | 0 | 52 | 56.341 | P | 0.200 | -0.157 |
| S08C | 2007 | 84 | 0 | 52 | 56.346 | P | 0.200 | 0.291  |
| M06C | 2007 | 84 | 0 | 52 | 56.416 | P | 0.200 | 0.095  |
| Q07A | 2007 | 84 | 0 | 52 | 56.717 | P | 0.200 | 0.051  |
| N06A | 2007 | 84 | 0 | 52 | 57.261 | P | 0.200 | -0.089 |
| L05A | 2007 | 84 | 0 | 52 | 57.295 | P | 0.200 | 0.054  |
| GRA  | 2007 | 84 | 0 | 52 | 57.522 | P | 0.200 | 0.090  |
| R08A | 2007 | 84 | 0 | 52 | 57.697 | P | 0.200 | -0.126 |
| P07A | 2007 | 84 | 0 | 52 | 57.790 | P | 0.200 | 0.000  |
| FUR  | 2007 | 84 | 0 | 52 | 57.871 | P | 0.200 | 0.048  |
| SHO  | 2007 | 84 | 0 | 52 | 58.558 | P | 0.200 | -0.365 |
| K05A | 2007 | 84 | 0 | 52 | 58.577 | P | 0.200 | 0.101  |
| J05A | 2007 | 84 | 0 | 52 | 58.703 | P | 0.200 | 0.066  |
| TUQ  | 2007 | 84 | 0 | 52 | 59.126 | P | 0.200 | -0.173 |
| Q08A | 2007 | 84 | 0 | 52 | 59.287 | P | 0.200 | -0.205 |
| S09A | 2007 | 84 | 0 | 52 | 59.294 | P | 0.200 | -0.214 |
| U10A | 2007 | 84 | 0 | 52 | 59.923 | P | 0.200 | 0.162  |
| N07B | 2007 | 84 | 0 | 53 | 0.028  | P | 0.200 | -0.011 |
| P08A | 2007 | 84 | 0 | 53 | 0.802  | P | 0.200 | 0.030  |
| M07A | 2007 | 84 | 0 | 53 | 0.807  | P | 0.200 | -0.008 |
| R09A | 2007 | 84 | 0 | 53 | 0.904  | P | 0.200 | -0.228 |
| TPNV | 2007 | 84 | 0 | 53 | 1.159  | P | 0.200 | -0.031 |
| V11A | 2007 | 84 | 0 | 53 | 1.661  | P | 0.200 | -0.043 |
| Q09A | 2007 | 84 | 0 | 53 | 1.712  | P | 0.200 | -0.096 |
| L07A | 2007 | 84 | 0 | 53 | 1.789  | P | 0.200 | 0.149  |
| O08A | 2007 | 84 | 0 | 53 | 1.860  | P | 0.200 | 0.145  |
| S10A | 2007 | 84 | 0 | 53 | 1.926  | P | 0.200 | -0.134 |
| N08A | 2007 | 84 | 0 | 53 | 2.803  | P | 0.200 | 0.113  |
| U11A | 2007 | 84 | 0 | 53 | 3.123  | P | 0.200 | 0.107  |
| P09A | 2007 | 84 | 0 | 53 | 3.166  | P | 0.200 | -0.219 |
| R10A | 2007 | 84 | 0 | 53 | 3.674  | P | 0.200 | -0.052 |
| S11A | 2007 | 84 | 0 | 53 | 3.969  | P | 0.200 | -0.210 |
| Q10A | 2007 | 84 | 0 | 53 | 4.481  | P | 0.200 | 0.081  |
| O09A | 2007 | 84 | 0 | 53 | 4.517  | P | 0.200 | 0.067  |
| T11A | 2007 | 84 | 0 | 53 | 5.276  | P | 0.200 | 0.112  |
| P10A | 2007 | 84 | 0 | 53 | 5.521  | P | 0.200 | -0.331 |
| R11A | 2007 | 84 | 0 | 53 | 6.043  | P | 0.200 | -0.138 |
| Q11A | 2007 | 84 | 0 | 53 | 6.796  | P | 0.200 | -0.129 |

|      |      |     |      |        |          |            |        |     |        |
|------|------|-----|------|--------|----------|------------|--------|-----|--------|
| 2007 | 226  | 5   | 38   | 8.0818 | 19.34600 | -155.06599 | 9.7000 | 346 | -0.006 |
| FARB | 2007 | 226 | 5 44 | 45.529 | P        | 0.200      | -0.747 |     |        |
| MCCM | 2007 | 226 | 5 44 | 47.951 | P        | 0.200      | -0.741 |     |        |
| BNLO | 2007 | 226 | 5 44 | 48.856 | P        | 0.200      | -0.866 |     |        |
| JRSC | 2007 | 226 | 5 44 | 49.458 | P        | 0.200      | -0.639 |     |        |
| HAST | 2007 | 226 | 5 44 | 50.819 | P        | 0.200      | -0.476 |     |        |
| P01C | 2007 | 226 | 5 44 | 50.859 | P        | 0.200      | -0.091 |     |        |
| BRK  | 2007 | 226 | 5 44 | 51.140 | P        | 0.200      | -0.445 |     |        |
| CVS  | 2007 | 226 | 5 44 | 51.340 | P        | 0.200      | -0.749 |     |        |
| BKS  | 2007 | 226 | 5 44 | 51.458 | P        | 0.200      | -0.368 |     |        |
| BRIB | 2007 | 226 | 5 44 | 52.282 | P        | 0.200      | -0.142 |     |        |
| SAO  | 2007 | 226 | 5 44 | 52.722 | P        | 0.200      | -0.504 |     |        |
| V04C | 2007 | 226 | 5 44 | 53.159 | P        | 0.200      | -0.484 |     |        |
| MHC  | 2007 | 226 | 5 44 | 53.836 | P        | 0.200      | -0.080 |     |        |
| WENL | 2007 | 226 | 5 44 | 53.996 | P        | 0.200      | 0.089  |     |        |
| BDM  | 2007 | 226 | 5 44 | 54.345 | P        | 0.200      | 0.026  |     |        |
| MNRC | 2007 | 226 | 5 44 | 54.487 | P        | 0.200      | 0.399  |     |        |
| PHL  | 2007 | 226 | 5 44 | 54.827 | P        | 0.200      | -0.336 |     |        |
| PACP | 2007 | 226 | 5 44 | 55.028 | P        | 0.200      | -0.056 |     |        |
| GASB | 2007 | 226 | 5 44 | 56.236 | P        | 0.200      | 0.760  |     |        |
| S04C | 2007 | 226 | 5 44 | 56.373 | P        | 0.200      | 0.133  |     |        |
| Q03C | 2007 | 226 | 5 44 | 56.412 | P        | 0.200      | 0.663  |     |        |
| PKD  | 2007 | 226 | 5 44 | 56.417 | P        | 0.200      | -0.198 |     |        |
| U04C | 2007 | 226 | 5 44 | 56.505 | P        | 0.200      | 0.153  |     |        |
| N02C | 2007 | 226 | 5 44 | 57.044 | P        | 0.200      | 0.415  |     |        |
| O02C | 2007 | 226 | 5 44 | 57.711 | P        | 0.200      | 0.671  |     |        |
| SMM  | 2007 | 226 | 5 44 | 58.550 | P        | 0.200      | -0.108 |     |        |
| MPP  | 2007 | 226 | 5 44 | 58.664 | P        | 0.200      | -0.262 |     |        |
| SUTB | 2007 | 226 | 5 44 | 58.862 | P        | 0.200      | -0.532 |     |        |
| T05C | 2007 | 226 | 5 44 | 59.073 | P        | 0.200      | 0.526  |     |        |
| Q04C | 2007 | 226 | 5 44 | 59.953 | P        | 0.200      | -0.438 |     |        |
| WDC  | 2007 | 226 | 5 45 | 0.360  | P        | 0.200      | 0.327  |     |        |
| R04C | 2007 | 226 | 5 45 | 0.626  | P        | 0.200      | -0.599 |     |        |
| SNC3 | 2007 | 226 | 5 45 | 0.686  | P        | 0.200      | -0.394 |     |        |
| LGU  | 2007 | 226 | 5 45 | 1.014  | P        | 0.200      | -0.884 |     |        |
| S05C | 2007 | 226 | 5 45 | 1.468  | P        | 0.200      | -0.692 |     |        |
| SNB3 | 2007 | 226 | 5 45 | 1.666  | P        | 0.200      | -0.273 |     |        |
| SNE4 | 2007 | 226 | 5 45 | 1.897  | P        | 0.200      | -0.161 |     |        |
| ORV  | 2007 | 226 | 5 45 | 2.023  | P        | 0.200      | -0.166 |     |        |
| SNG5 | 2007 | 226 | 5 45 | 2.468  | P        | 0.200      | -0.276 |     |        |
| M02C | 2007 | 226 | 5 45 | 2.493  | P        | 0.200      | 0.894  |     |        |
| SND4 | 2007 | 226 | 5 45 | 2.516  | P        | 0.200      | 0.074  |     |        |
| SNA3 | 2007 | 226 | 5 45 | 3.058  | P        | 0.200      | -0.016 |     |        |
| SNC4 | 2007 | 226 | 5 45 | 3.151  | P        | 0.200      | -0.013 |     |        |
| SN93 | 2007 | 226 | 5 45 | 3.200  | P        | 0.200      | 0.220  |     |        |
| SNE5 | 2007 | 226 | 5 45 | 3.739  | P        | 0.200      | -0.044 |     |        |
| CMB  | 2007 | 226 | 5 45 | 3.982  | P        | 0.200      | -0.010 |     |        |
| LAVA | 2007 | 226 | 5 45 | 4.125  | P        | 0.200      | -0.010 |     |        |
| SND5 | 2007 | 226 | 5 45 | 4.169  | P        | 0.200      | -0.318 |     |        |
| CIA  | 2007 | 226 | 5 45 | 4.178  | P        | 0.200      | -0.757 |     |        |
| K02A | 2007 | 226 | 5 45 | 4.445  | P        | 0.200      | 0.502  |     |        |
| BAK  | 2007 | 226 | 5 45 | 4.445  | P        | 0.200      | -0.115 |     |        |
| SNA4 | 2007 | 226 | 5 45 | 4.536  | P        | 0.200      | -0.093 |     |        |
| SNC5 | 2007 | 226 | 5 45 | 4.624  | P        | 0.200      | -0.458 |     |        |
| YBH  | 2007 | 226 | 5 45 | 4.723  | P        | 0.200      | 0.869  |     |        |
| T06C | 2007 | 226 | 5 45 | 4.827  | P        | 0.200      | -0.300 |     |        |
| RPV  | 2007 | 226 | 5 45 | 5.164  | P        | 0.200      | -0.508 |     |        |
| VES  | 2007 | 226 | 5 45 | 5.210  | P        | 0.200      | -0.700 |     |        |
| ARV  | 2007 | 226 | 5 45 | 5.341  | P        | 0.200      | -0.579 |     |        |
| SNB5 | 2007 | 226 | 5 45 | 5.438  | P        | 0.200      | -0.280 |     |        |
| SNF6 | 2007 | 226 | 5 45 | 5.439  | P        | 0.200      | 0.024  |     |        |
| DJJ  | 2007 | 226 | 5 45 | 5.453  | P        | 0.200      | -0.633 |     |        |
| RCT  | 2007 | 226 | 5 45 | 5.458  | P        | 0.200      | -0.751 |     |        |



|      |      |     |   |    |        |   |       |        |
|------|------|-----|---|----|--------|---|-------|--------|
| M03C | 2007 | 226 | 5 | 45 | 5.607  | P | 0.200 | 0.276  |
| SNE6 | 2007 | 226 | 5 | 45 | 5.986  | P | 0.200 | -0.131 |
| SNA5 | 2007 | 226 | 5 | 45 | 6.247  | P | 0.200 | -0.236 |
| SN63 | 2007 | 226 | 5 | 45 | 6.504  | P | 0.200 | -0.382 |
| DEC  | 2007 | 226 | 5 | 45 | 6.610  | P | 0.200 | -0.667 |
| S06C | 2007 | 226 | 5 | 45 | 6.630  | P | 0.200 | -0.432 |
| SNG7 | 2007 | 226 | 5 | 45 | 6.670  | P | 0.200 | 0.288  |
| YO01 | 2007 | 226 | 5 | 45 | 6.740  | P | 0.200 | -0.331 |
| HUMO | 2007 | 226 | 5 | 45 | 6.769  | P | 0.200 | 0.627  |
| SNC6 | 2007 | 226 | 5 | 45 | 6.940  | P | 0.200 | -0.202 |
| P05C | 2007 | 226 | 5 | 45 | 6.962  | P | 0.200 | -0.023 |
| YO02 | 2007 | 226 | 5 | 45 | 7.017  | P | 0.200 | -0.408 |
| YO03 | 2007 | 226 | 5 | 45 | 7.228  | P | 0.200 | -0.390 |
| DBO  | 2007 | 226 | 5 | 45 | 7.443  | P | 0.200 | 0.545  |
| HATC | 2007 | 226 | 5 | 45 | 7.495  | P | 0.200 | 0.133  |
| YO04 | 2007 | 226 | 5 | 45 | 7.563  | P | 0.200 | -0.253 |
| SNB6 | 2007 | 226 | 5 | 45 | 7.573  | P | 0.200 | -0.130 |
| O05C | 2007 | 226 | 5 | 45 | 7.691  | P | 0.200 | 0.446  |
| SN96 | 2007 | 226 | 5 | 45 | 7.704  | P | 0.200 | -0.110 |
| YO05 | 2007 | 226 | 5 | 45 | 7.802  | P | 0.200 | -0.229 |
| O04C | 2007 | 226 | 5 | 45 | 7.909  | P | 0.200 | 0.217  |
| SN64 | 2007 | 226 | 5 | 45 | 8.202  | P | 0.200 | -0.169 |
| HELL | 2007 | 226 | 5 | 45 | 8.282  | P | 0.200 | -0.545 |
| SNE7 | 2007 | 226 | 5 | 45 | 8.290  | P | 0.200 | 0.159  |
| R05C | 2007 | 226 | 5 | 45 | 8.291  | P | 0.200 | -0.090 |
| YO06 | 2007 | 226 | 5 | 45 | 8.411  | P | 0.200 | -0.145 |
| SND7 | 2007 | 226 | 5 | 45 | 8.429  | P | 0.200 | 0.168  |
| SNC7 | 2007 | 226 | 5 | 45 | 8.436  | P | 0.200 | 0.026  |
| YO07 | 2007 | 226 | 5 | 45 | 8.517  | P | 0.200 | -0.175 |
| MWC  | 2007 | 226 | 5 | 45 | 8.629  | P | 0.200 | -0.686 |
| VCS  | 2007 | 226 | 5 | 45 | 8.748  | P | 0.200 | -0.551 |
| SNB7 | 2007 | 226 | 5 | 45 | 8.763  | P | 0.200 | -0.228 |
| YO08 | 2007 | 226 | 5 | 45 | 8.816  | P | 0.200 | -0.068 |
| CHF  | 2007 | 226 | 5 | 45 | 8.992  | P | 0.200 | -0.772 |
| YO09 | 2007 | 226 | 5 | 45 | 9.173  | P | 0.200 | -0.057 |
| SNF8 | 2007 | 226 | 5 | 45 | 9.363  | P | 0.200 | -0.001 |
| SN86 | 2007 | 226 | 5 | 45 | 9.422  | P | 0.200 | 0.009  |
| M04C | 2007 | 226 | 5 | 45 | 9.514  | P | 0.200 | 0.559  |
| ISA  | 2007 | 226 | 5 | 45 | 9.552  | P | 0.200 | -0.167 |
| YO10 | 2007 | 226 | 5 | 45 | 9.675  | P | 0.200 | 0.001  |
| YO11 | 2007 | 226 | 5 | 45 | 10.086 | P | 0.200 | 0.034  |
| J03A | 2007 | 226 | 5 | 45 | 10.110 | P | 0.200 | 0.773  |
| BEK  | 2007 | 226 | 5 | 45 | 10.434 | P | 0.200 | 0.010  |
| SN97 | 2007 | 226 | 5 | 45 | 10.452 | P | 0.200 | 0.118  |
| SN55 | 2007 | 226 | 5 | 45 | 10.530 | P | 0.200 | 0.008  |
| SND8 | 2007 | 226 | 5 | 45 | 10.581 | P | 0.200 | 0.131  |
| L04A | 2007 | 226 | 5 | 45 | 10.632 | P | 0.200 | 0.313  |
| EDW2 | 2007 | 226 | 5 | 45 | 10.639 | P | 0.200 | -0.433 |
| SNA7 | 2007 | 226 | 5 | 45 | 10.708 | P | 0.200 | 0.210  |
| I03A | 2007 | 226 | 5 | 45 | 11.050 | P | 0.200 | 0.588  |
| BFS  | 2007 | 226 | 5 | 45 | 11.095 | P | 0.200 | -0.894 |
| SNF9 | 2007 | 226 | 5 | 45 | 11.169 | P | 0.200 | -0.073 |
| ELFS | 2007 | 226 | 5 | 45 | 11.365 | P | 0.200 | 0.460  |
| SN87 | 2007 | 226 | 5 | 45 | 11.439 | P | 0.200 | 0.166  |
| M05C | 2007 | 226 | 5 | 45 | 11.461 | P | 0.200 | 0.203  |
| R06C | 2007 | 226 | 5 | 45 | 11.827 | P | 0.200 | 0.290  |
| SNE9 | 2007 | 226 | 5 | 45 | 12.012 | P | 0.200 | -0.070 |
| WCN  | 2007 | 226 | 5 | 45 | 12.229 | P | 0.200 | 0.066  |
| SND9 | 2007 | 226 | 5 | 45 | 12.681 | P | 0.200 | 0.246  |
| P06A | 2007 | 226 | 5 | 45 | 12.692 | P | 0.200 | 0.137  |
| R07C | 2007 | 226 | 5 | 45 | 12.911 | P | 0.200 | 0.165  |
| SN98 | 2007 | 226 | 5 | 45 | 12.998 | P | 0.200 | -0.026 |
| MLAC | 2007 | 226 | 5 | 45 | 13.082 | P | 0.200 | 0.291  |

|      |      |     |   |    |        |   |       |        |
|------|------|-----|---|----|--------|---|-------|--------|
| K04A | 2007 | 226 | 5 | 45 | 13.533 | P | 0.200 | 0.519  |
| SNB9 | 2007 | 226 | 5 | 45 | 13.574 | P | 0.200 | 0.121  |
| J04A | 2007 | 226 | 5 | 45 | 14.040 | P | 0.200 | 0.393  |
| VTV  | 2007 | 226 | 5 | 45 | 14.424 | P | 0.200 | -0.428 |
| LRL  | 2007 | 226 | 5 | 45 | 14.425 | P | 0.200 | -0.173 |
| CWC  | 2007 | 226 | 5 | 45 | 14.427 | P | 0.200 | 0.020  |
| I04A | 2007 | 226 | 5 | 45 | 14.610 | P | 0.200 | 0.335  |
| O06A | 2007 | 226 | 5 | 45 | 14.793 | P | 0.200 | 0.164  |
| M06C | 2007 | 226 | 5 | 45 | 14.953 | P | 0.200 | 0.405  |
| TIN  | 2007 | 226 | 5 | 45 | 15.287 | P | 0.200 | 0.351  |
| SVD  | 2007 | 226 | 5 | 45 | 15.402 | P | 0.200 | -0.081 |
| L05A | 2007 | 226 | 5 | 45 | 16.514 | P | 0.200 | 0.730  |
| N06A | 2007 | 226 | 5 | 45 | 16.810 | P | 0.200 | 0.186  |
| Q07A | 2007 | 226 | 5 | 45 | 16.857 | P | 0.200 | 0.089  |
| BBR  | 2007 | 226 | 5 | 45 | 17.031 | P | 0.200 | -0.157 |
| S08C | 2007 | 226 | 5 | 45 | 17.340 | P | 0.200 | 0.527  |
| RRX  | 2007 | 226 | 5 | 45 | 17.403 | P | 0.200 | -0.344 |
| MPM  | 2007 | 226 | 5 | 45 | 17.494 | P | 0.200 | 0.194  |
| SLA  | 2007 | 226 | 5 | 45 | 18.247 | P | 0.200 | 0.041  |
| P07A | 2007 | 226 | 5 | 45 | 18.622 | P | 0.200 | 0.501  |
| K05A | 2007 | 226 | 5 | 45 | 18.886 | P | 0.200 | 0.747  |
| J05A | 2007 | 226 | 5 | 45 | 19.267 | P | 0.200 | 0.744  |
| R08A | 2007 | 226 | 5 | 45 | 19.324 | P | 0.200 | -0.090 |
| GSC  | 2007 | 226 | 5 | 45 | 19.918 | P | 0.200 | -0.149 |
| O07A | 2007 | 226 | 5 | 45 | 20.535 | P | 0.200 | 0.254  |
| GRA  | 2007 | 226 | 5 | 45 | 20.950 | P | 0.200 | 0.567  |
| HEC  | 2007 | 226 | 5 | 45 | 21.717 | P | 0.200 | -0.405 |
| Q08A | 2007 | 226 | 5 | 45 | 21.868 | P | 0.200 | -0.061 |
| N07B | 2007 | 226 | 5 | 45 | 22.123 | P | 0.200 | 0.373  |
| FUR  | 2007 | 226 | 5 | 45 | 22.488 | P | 0.200 | 0.317  |
| M07A | 2007 | 226 | 5 | 45 | 23.243 | P | 0.200 | 0.434  |
| S09A | 2007 | 226 | 5 | 45 | 23.325 | P | 0.200 | 0.036  |
| P08A | 2007 | 226 | 5 | 45 | 24.060 | P | 0.200 | 0.472  |
| TPH  | 2007 | 226 | 5 | 45 | 24.340 | P | 0.200 | 0.096  |
| SHO  | 2007 | 226 | 5 | 45 | 24.569 | P | 0.200 | -0.258 |
| L07A | 2007 | 226 | 5 | 45 | 24.813 | P | 0.200 | 0.728  |
| O08A | 2007 | 226 | 5 | 45 | 25.507 | P | 0.200 | 0.393  |
| R09A | 2007 | 226 | 5 | 45 | 25.688 | P | 0.200 | -0.004 |
| TUQ  | 2007 | 226 | 5 | 45 | 26.137 | P | 0.200 | -0.181 |
| U10A | 2007 | 226 | 5 | 45 | 26.154 | P | 0.200 | 0.456  |
| Q09A | 2007 | 226 | 5 | 45 | 26.822 | P | 0.200 | 0.246  |
| N08A | 2007 | 226 | 5 | 45 | 27.089 | P | 0.200 | 0.390  |
| TPNV | 2007 | 226 | 5 | 45 | 27.834 | P | 0.200 | 0.289  |
| S10A | 2007 | 226 | 5 | 45 | 27.888 | P | 0.200 | 0.052  |
| P09A | 2007 | 226 | 5 | 45 | 28.970 | P | 0.200 | 0.109  |
| V11A | 2007 | 226 | 5 | 45 | 30.607 | P | 0.200 | 0.286  |
| O09A | 2007 | 226 | 5 | 45 | 30.882 | P | 0.200 | 0.440  |
| R10A | 2007 | 226 | 5 | 45 | 30.991 | P | 0.200 | 0.447  |
| Q10A | 2007 | 226 | 5 | 45 | 31.577 | P | 0.200 | 0.092  |
| U11A | 2007 | 226 | 5 | 45 | 32.331 | P | 0.200 | 0.398  |
| S11A | 2007 | 226 | 5 | 45 | 32.595 | P | 0.200 | 0.201  |
| P10A | 2007 | 226 | 5 | 45 | 33.470 | P | 0.200 | 0.287  |
| T11A | 2007 | 226 | 5 | 45 | 35.090 | P | 0.200 | 0.249  |
| R11A | 2007 | 226 | 5 | 45 | 35.480 | P | 0.200 | 0.203  |
| Q11A | 2007 | 226 | 5 | 45 | 36.391 | P | 0.200 | 0.407  |

|      |      |     |    |         |           |           |         |       |       |
|------|------|-----|----|---------|-----------|-----------|---------|-------|-------|
| 2007 | 208  | 14  | 46 | 27.8567 | -21.45900 | 170.93900 | 10.0000 | 341   | 0.001 |
| FARB | 2007 | 208 | 14 | 59      | 6.020     | P         | 0.200   | 0.059 |       |
| MCCM | 2007 | 208 | 14 | 59      | 7.527     | P         | 0.200   | 0.018 |       |
| BNLO | 2007 | 208 | 14 | 59      | 7.604     | P         | 0.200   | 0.113 |       |
| HAST | 2007 | 208 | 14 | 59      | 8.049     | P         | 0.200   | 0.357 |       |
| JRSC | 2007 | 208 | 14 | 59      | 8.074     | P         | 0.200   | 0.243 |       |
| V03C | 2007 | 208 | 14 | 59      | 8.318     | P         | 0.200   | 0.497 |       |

|      |      |     |    |    |        |   |       |        |
|------|------|-----|----|----|--------|---|-------|--------|
| SCZ2 | 2007 | 208 | 14 | 59 | 8.484  | P | 0.200 | -0.130 |
| V04C | 2007 | 208 | 14 | 59 | 8.529  | P | 0.200 | 0.240  |
| PHL  | 2007 | 208 | 14 | 59 | 9.046  | P | 0.200 | 0.183  |
| BRK  | 2007 | 208 | 14 | 59 | 9.091  | P | 0.200 | 0.131  |
| BKS  | 2007 | 208 | 14 | 59 | 9.382  | P | 0.200 | 0.228  |
| SAO  | 2007 | 208 | 14 | 59 | 9.391  | P | 0.200 | 0.270  |
| CVS  | 2007 | 208 | 14 | 59 | 9.434  | P | 0.200 | -0.226 |
| SBC  | 2007 | 208 | 14 | 59 | 9.569  | P | 0.200 | 0.100  |
| P01C | 2007 | 208 | 14 | 59 | 9.799  | P | 0.200 | 0.270  |
| BRIB | 2007 | 208 | 14 | 59 | 9.819  | P | 0.200 | 0.422  |
| O01C | 2007 | 208 | 14 | 59 | 10.249 | P | 0.200 | 0.582  |
| MHC  | 2007 | 208 | 14 | 59 | 10.371 | P | 0.200 | 0.328  |
| PKD  | 2007 | 208 | 14 | 59 | 10.373 | P | 0.200 | 0.296  |
| WENL | 2007 | 208 | 14 | 59 | 10.439 | P | 0.200 | 0.424  |
| LGU  | 2007 | 208 | 14 | 59 | 10.527 | P | 0.200 | -0.525 |
| PACP | 2007 | 208 | 14 | 59 | 10.690 | P | 0.200 | 0.394  |
| MPP  | 2007 | 208 | 14 | 59 | 10.747 | P | 0.200 | 0.386  |
| BDM  | 2007 | 208 | 14 | 59 | 11.008 | P | 0.200 | 0.566  |
| U04C | 2007 | 208 | 14 | 59 | 11.015 | P | 0.200 | 0.680  |
| SMM  | 2007 | 208 | 14 | 59 | 11.033 | P | 0.200 | 0.363  |
| CIA  | 2007 | 208 | 14 | 59 | 11.199 | P | 0.200 | -0.631 |
| JCC  | 2007 | 208 | 14 | 59 | 11.308 | P | 0.200 | 0.534  |
| S04C | 2007 | 208 | 14 | 59 | 11.532 | P | 0.200 | 0.250  |
| MNRC | 2007 | 208 | 14 | 59 | 11.637 | P | 0.200 | 0.631  |
| RPV  | 2007 | 208 | 14 | 59 | 12.125 | P | 0.200 | -0.485 |
| FMP  | 2007 | 208 | 14 | 59 | 12.396 | P | 0.200 | -0.444 |
| Q03C | 2007 | 208 | 14 | 59 | 12.567 | P | 0.200 | 0.965  |
| T05C | 2007 | 208 | 14 | 59 | 12.635 | P | 0.200 | 0.582  |
| DJJ  | 2007 | 208 | 14 | 59 | 12.684 | P | 0.200 | -0.416 |
| V05C | 2007 | 208 | 14 | 59 | 12.881 | P | 0.200 | 0.732  |
| GASB | 2007 | 208 | 14 | 59 | 13.070 | P | 0.200 | 0.980  |
| U05C | 2007 | 208 | 14 | 59 | 13.109 | P | 0.200 | 0.652  |
| OSI  | 2007 | 208 | 14 | 59 | 13.369 | P | 0.200 | -0.209 |
| DEC  | 2007 | 208 | 14 | 59 | 13.450 | P | 0.200 | -0.456 |
| SUTB | 2007 | 208 | 14 | 59 | 13.487 | P | 0.200 | -0.551 |
| N02C | 2007 | 208 | 14 | 59 | 13.529 | P | 0.200 | 0.432  |
| M01C | 2007 | 208 | 14 | 59 | 13.655 | P | 0.200 | 0.623  |
| O02C | 2007 | 208 | 14 | 59 | 13.812 | P | 0.200 | 0.603  |
| S05C | 2007 | 208 | 14 | 59 | 13.925 | P | 0.200 | -0.339 |
| R04C | 2007 | 208 | 14 | 59 | 14.065 | P | 0.200 | -0.205 |
| ARV  | 2007 | 208 | 14 | 59 | 14.087 | P | 0.200 | 0.008  |
| Q04C | 2007 | 208 | 14 | 59 | 14.097 | P | 0.200 | -0.092 |
| VES  | 2007 | 208 | 14 | 59 | 14.319 | P | 0.200 | -0.477 |
| MWC  | 2007 | 208 | 14 | 59 | 14.547 | P | 0.200 | -0.560 |
| SNC3 | 2007 | 208 | 14 | 59 | 14.650 | P | 0.200 | 0.151  |
| CHF  | 2007 | 208 | 14 | 59 | 14.809 | P | 0.200 | -0.512 |
| O03C | 2007 | 208 | 14 | 59 | 14.897 | P | 0.200 | 0.005  |
| RCT  | 2007 | 208 | 14 | 59 | 14.906 | P | 0.200 | -0.538 |
| VCS  | 2007 | 208 | 14 | 59 | 14.929 | P | 0.200 | -0.288 |
| SNB3 | 2007 | 208 | 14 | 59 | 14.973 | P | 0.200 | -0.072 |
| WDC  | 2007 | 208 | 14 | 59 | 15.047 | P | 0.200 | 0.171  |
| K01A | 2007 | 208 | 14 | 59 | 15.056 | P | 0.200 | 0.625  |
| SNE4 | 2007 | 208 | 14 | 59 | 15.308 | P | 0.200 | -0.036 |
| T06C | 2007 | 208 | 14 | 59 | 15.385 | P | 0.200 | -0.205 |
| SND4 | 2007 | 208 | 14 | 59 | 15.393 | P | 0.200 | -0.166 |
| ORV  | 2007 | 208 | 14 | 59 | 15.492 | P | 0.200 | -0.172 |
| SN93 | 2007 | 208 | 14 | 59 | 15.496 | P | 0.200 | 0.368  |
| CMB  | 2007 | 208 | 14 | 59 | 15.575 | P | 0.200 | -0.082 |
| SNC4 | 2007 | 208 | 14 | 59 | 15.643 | P | 0.200 | -0.074 |
| SNA3 | 2007 | 208 | 14 | 59 | 15.704 | P | 0.200 | 0.322  |
| SNG5 | 2007 | 208 | 14 | 59 | 15.756 | P | 0.200 | -0.213 |
| BFS  | 2007 | 208 | 14 | 59 | 15.922 | P | 0.200 | -0.434 |
| L02A | 2007 | 208 | 14 | 59 | 16.116 | P | 0.200 | 0.498  |

|      |      |     |    |    |        |   |       |        |
|------|------|-----|----|----|--------|---|-------|--------|
| SNA4 | 2007 | 208 | 14 | 59 | 16.301 | P | 0.200 | -0.005 |
| SND5 | 2007 | 208 | 14 | 59 | 16.330 | P | 0.200 | -0.280 |
| SNE5 | 2007 | 208 | 14 | 59 | 16.349 | P | 0.200 | -0.145 |
| SNC5 | 2007 | 208 | 14 | 59 | 16.400 | P | 0.200 | -0.476 |
| EDW2 | 2007 | 208 | 14 | 59 | 16.454 | P | 0.200 | -0.072 |
| M02C | 2007 | 208 | 14 | 59 | 16.556 | P | 0.200 | 0.619  |
| ISA  | 2007 | 208 | 14 | 59 | 16.632 | P | 0.200 | -0.025 |
| HELL | 2007 | 208 | 14 | 59 | 16.759 | P | 0.200 | -0.474 |
| SN63 | 2007 | 208 | 14 | 59 | 16.834 | P | 0.200 | -0.253 |
| S06C | 2007 | 208 | 14 | 59 | 16.917 | P | 0.200 | -0.440 |
| SNB5 | 2007 | 208 | 14 | 59 | 16.956 | P | 0.200 | -0.153 |
| YO01 | 2007 | 208 | 14 | 59 | 16.977 | P | 0.200 | -0.189 |
| YO02 | 2007 | 208 | 14 | 59 | 17.110 | P | 0.200 | -0.323 |
| SNA5 | 2007 | 208 | 14 | 59 | 17.256 | P | 0.200 | -0.257 |
| SNF6 | 2007 | 208 | 14 | 59 | 17.289 | P | 0.200 | -0.213 |
| YO03 | 2007 | 208 | 14 | 59 | 17.331 | P | 0.200 | -0.164 |
| YO04 | 2007 | 208 | 14 | 59 | 17.475 | P | 0.200 | -0.249 |
| ADO  | 2007 | 208 | 14 | 59 | 17.543 | P | 0.200 | -0.384 |
| SNE6 | 2007 | 208 | 14 | 59 | 17.627 | P | 0.200 | -0.197 |
| YO05 | 2007 | 208 | 14 | 59 | 17.637 | P | 0.200 | -0.229 |
| YBH  | 2007 | 208 | 14 | 59 | 17.683 | P | 0.200 | 0.458  |
| VTV  | 2007 | 208 | 14 | 59 | 17.725 | P | 0.200 | -0.407 |
| SN64 | 2007 | 208 | 14 | 59 | 17.787 | P | 0.200 | -0.207 |
| SVD  | 2007 | 208 | 14 | 59 | 17.873 | P | 0.200 | -0.201 |
| M03C | 2007 | 208 | 14 | 59 | 17.893 | P | 0.200 | -0.168 |
| YO07 | 2007 | 208 | 14 | 59 | 17.936 | P | 0.200 | -0.155 |
| YO06 | 2007 | 208 | 14 | 59 | 17.959 | P | 0.200 | -0.101 |
| SNG7 | 2007 | 208 | 14 | 59 | 18.008 | P | 0.200 | -0.220 |
| SNC6 | 2007 | 208 | 14 | 59 | 18.011 | P | 0.200 | -0.068 |
| SN96 | 2007 | 208 | 14 | 59 | 18.026 | P | 0.200 | -0.135 |
| YO08 | 2007 | 208 | 14 | 59 | 18.133 | P | 0.200 | -0.172 |
| P05C | 2007 | 208 | 14 | 59 | 18.215 | P | 0.200 | 0.170  |
| YO09 | 2007 | 208 | 14 | 59 | 18.248 | P | 0.200 | -0.210 |
| SNB6 | 2007 | 208 | 14 | 59 | 18.268 | P | 0.200 | 0.014  |
| TAKO | 2007 | 208 | 14 | 59 | 18.375 | P | 0.200 | 0.268  |
| R05C | 2007 | 208 | 14 | 59 | 18.502 | P | 0.200 | -0.019 |
| YO10 | 2007 | 208 | 14 | 59 | 18.536 | P | 0.200 | -0.099 |
| O05C | 2007 | 208 | 14 | 59 | 18.552 | P | 0.200 | 0.133  |
| YO11 | 2007 | 208 | 14 | 59 | 18.816 | P | 0.200 | -0.088 |
| J02A | 2007 | 208 | 14 | 59 | 18.842 | P | 0.200 | 0.270  |
| O04C | 2007 | 208 | 14 | 59 | 18.879 | P | 0.200 | 0.000  |
| BBR  | 2007 | 208 | 14 | 59 | 18.880 | P | 0.200 | -0.315 |
| HATC | 2007 | 208 | 14 | 59 | 18.907 | P | 0.200 | -0.087 |
| SNB7 | 2007 | 208 | 14 | 59 | 18.914 | P | 0.200 | -0.169 |
| SNE7 | 2007 | 208 | 14 | 59 | 18.967 | P | 0.200 | 0.030  |
| SN86 | 2007 | 208 | 14 | 59 | 18.975 | P | 0.200 | -0.014 |
| SNC7 | 2007 | 208 | 14 | 59 | 18.990 | P | 0.200 | 0.138  |
| SN55 | 2007 | 208 | 14 | 59 | 18.994 | P | 0.200 | -0.211 |
| LRL  | 2007 | 208 | 14 | 59 | 19.005 | P | 0.200 | 0.008  |
| SND7 | 2007 | 208 | 14 | 59 | 19.026 | P | 0.200 | 0.159  |
| HUMO | 2007 | 208 | 14 | 59 | 19.064 | P | 0.200 | 0.390  |
| DBO  | 2007 | 208 | 14 | 59 | 19.241 | P | 0.200 | 0.166  |
| RRX  | 2007 | 208 | 14 | 59 | 19.559 | P | 0.200 | -0.384 |
| SNF8 | 2007 | 208 | 14 | 59 | 19.633 | P | 0.200 | -0.190 |
| SN97 | 2007 | 208 | 14 | 59 | 19.663 | P | 0.200 | 0.060  |
| CWC  | 2007 | 208 | 14 | 59 | 19.807 | P | 0.200 | -0.196 |
| SNA7 | 2007 | 208 | 14 | 59 | 19.990 | P | 0.200 | 0.151  |
| SND8 | 2007 | 208 | 14 | 59 | 20.092 | P | 0.200 | 0.068  |
| BEK  | 2007 | 208 | 14 | 59 | 20.128 | P | 0.200 | -0.122 |
| M04C | 2007 | 208 | 14 | 59 | 20.134 | P | 0.200 | 0.147  |
| R06C | 2007 | 208 | 14 | 59 | 20.290 | P | 0.200 | 0.304  |
| SN87 | 2007 | 208 | 14 | 59 | 20.291 | P | 0.200 | 0.209  |
| MLAC | 2007 | 208 | 14 | 59 | 20.343 | P | 0.200 | 0.270  |

|      |      |     |    |    |        |   |       |        |
|------|------|-----|----|----|--------|---|-------|--------|
| R07C | 2007 | 208 | 14 | 59 | 20.451 | P | 0.200 | 0.003  |
| SNF9 | 2007 | 208 | 14 | 59 | 20.493 | P | 0.200 | -0.202 |
| TIN  | 2007 | 208 | 14 | 59 | 20.685 | P | 0.200 | -0.031 |
| L04A | 2007 | 208 | 14 | 59 | 20.777 | P | 0.200 | -0.052 |
| J03A | 2007 | 208 | 14 | 59 | 20.832 | P | 0.200 | 0.567  |
| SN98 | 2007 | 208 | 14 | 59 | 20.908 | P | 0.200 | -0.089 |
| SNE9 | 2007 | 208 | 14 | 59 | 21.034 | P | 0.200 | -0.231 |
| MPM  | 2007 | 208 | 14 | 59 | 21.038 | P | 0.200 | 0.045  |
| I03A | 2007 | 208 | 14 | 59 | 21.116 | P | 0.200 | 0.107  |
| M05C | 2007 | 208 | 14 | 59 | 21.120 | P | 0.200 | -0.093 |
| SLA  | 2007 | 208 | 14 | 59 | 21.162 | P | 0.200 | -0.214 |
| P06A | 2007 | 208 | 14 | 59 | 21.185 | P | 0.200 | -0.028 |
| SND9 | 2007 | 208 | 14 | 59 | 21.378 | P | 0.200 | 0.082  |
| GSC  | 2007 | 208 | 14 | 59 | 21.441 | P | 0.200 | -0.174 |
| SNB9 | 2007 | 208 | 14 | 59 | 21.618 | P | 0.200 | 0.097  |
| HEC  | 2007 | 208 | 14 | 59 | 21.726 | P | 0.200 | -0.392 |
| S08C | 2007 | 208 | 14 | 59 | 22.325 | P | 0.200 | 0.259  |
| O06A | 2007 | 208 | 14 | 59 | 22.333 | P | 0.200 | -0.180 |
| K04A | 2007 | 208 | 14 | 59 | 22.360 | P | 0.200 | -0.034 |
| I04A | 2007 | 208 | 14 | 59 | 22.722 | P | 0.200 | -0.328 |
| J04A | 2007 | 208 | 14 | 59 | 22.807 | P | 0.200 | -0.049 |
| Q07A | 2007 | 208 | 14 | 59 | 22.849 | P | 0.200 | -0.032 |
| M06C | 2007 | 208 | 14 | 59 | 22.994 | P | 0.200 | 0.112  |
| GRA  | 2007 | 208 | 14 | 59 | 23.361 | P | 0.200 | 0.005  |
| FUR  | 2007 | 208 | 14 | 59 | 23.677 | P | 0.200 | 0.018  |
| N06A | 2007 | 208 | 14 | 59 | 23.707 | P | 0.200 | -0.119 |
| L05A | 2007 | 208 | 14 | 59 | 23.991 | P | 0.200 | 0.057  |
| P07A | 2007 | 208 | 14 | 59 | 24.150 | P | 0.200 | 0.061  |
| SHO  | 2007 | 208 | 14 | 59 | 24.224 | P | 0.200 | -0.453 |
| TUQ  | 2007 | 208 | 14 | 59 | 24.724 | P | 0.200 | -0.251 |
| S09A | 2007 | 208 | 14 | 59 | 25.319 | P | 0.200 | -0.191 |
| O07A | 2007 | 208 | 14 | 59 | 25.342 | P | 0.200 | -0.197 |
| Q08A | 2007 | 208 | 14 | 59 | 25.378 | P | 0.200 | -0.289 |
| K05A | 2007 | 208 | 14 | 59 | 25.460 | P | 0.200 | 0.217  |
| J05A | 2007 | 208 | 14 | 59 | 25.569 | P | 0.200 | 0.085  |
| U10A | 2007 | 208 | 14 | 59 | 25.855 | P | 0.200 | 0.277  |
| N07B | 2007 | 208 | 14 | 59 | 26.495 | P | 0.200 | 0.002  |
| TPNV | 2007 | 208 | 14 | 59 | 26.954 | P | 0.200 | -0.118 |
| R09A | 2007 | 208 | 14 | 59 | 26.987 | P | 0.200 | -0.216 |
| P08A | 2007 | 208 | 14 | 59 | 27.102 | P | 0.200 | 0.044  |
| V11A | 2007 | 208 | 14 | 59 | 27.293 | P | 0.200 | -0.130 |
| M07A | 2007 | 208 | 14 | 59 | 27.357 | P | 0.200 | 0.009  |
| S10A | 2007 | 208 | 14 | 59 | 27.854 | P | 0.200 | -0.227 |
| Q09A | 2007 | 208 | 14 | 59 | 27.873 | P | 0.200 | -0.085 |
| L07A | 2007 | 208 | 14 | 59 | 28.524 | P | 0.200 | 0.257  |
| U11A | 2007 | 208 | 14 | 59 | 28.825 | P | 0.200 | 0.012  |
| N08A | 2007 | 208 | 14 | 59 | 29.139 | P | 0.200 | 0.022  |
| P09A | 2007 | 208 | 14 | 59 | 29.363 | P | 0.200 | -0.253 |
| S11A | 2007 | 208 | 14 | 59 | 29.833 | P | 0.200 | -0.294 |
| Q10A | 2007 | 208 | 14 | 59 | 30.462 | P | 0.200 | -0.053 |
| O09A | 2007 | 208 | 14 | 59 | 30.792 | P | 0.200 | 0.035  |
| T11A | 2007 | 208 | 14 | 59 | 31.123 | P | 0.200 | 0.081  |
| P10A | 2007 | 208 | 14 | 59 | 31.802 | P | 0.200 | -0.268 |
| R11A | 2007 | 208 | 14 | 59 | 31.987 | P | 0.200 | -0.226 |
| Q11A | 2007 | 208 | 14 | 59 | 32.754 | P | 0.200 | -0.261 |

|      |      |     |    |         |           |           |        |        |       |
|------|------|-----|----|---------|-----------|-----------|--------|--------|-------|
| 2007 | 196  | 9   | 27 | 34.9169 | -15.38300 | 168.59700 | 8.0000 | 335    | 0.001 |
| FARB | 2007 | 196 | 9  | 40      | 0.822     | P         | 0.200  | -0.147 |       |
| MCCM | 2007 | 196 | 9  | 40      | 2.154     | P         | 0.200  | -0.246 |       |
| BNLO | 2007 | 196 | 9  | 40      | 2.945     | P         | 0.200  | -0.028 |       |
| JRSC | 2007 | 196 | 9  | 40      | 3.289     | P         | 0.200  | 0.086  |       |
| P01C | 2007 | 196 | 9  | 40      | 3.895     | P         | 0.200  | 0.120  |       |
| O01C | 2007 | 196 | 9  | 40      | 3.901     | P         | 0.200  | 0.383  |       |

|      |      |     |   |    |        |   |       |        |
|------|------|-----|---|----|--------|---|-------|--------|
| HAST | 2007 | 196 | 9 | 40 | 3.978  | P | 0.200 | 0.308  |
| BRK  | 2007 | 196 | 9 | 40 | 4.072  | P | 0.200 | -0.081 |
| CVS  | 2007 | 196 | 9 | 40 | 4.125  | P | 0.200 | -0.464 |
| BKS  | 2007 | 196 | 9 | 40 | 4.371  | P | 0.200 | 0.021  |
| V03C | 2007 | 196 | 9 | 40 | 4.593  | P | 0.200 | 0.525  |
| JCC  | 2007 | 196 | 9 | 40 | 4.658  | P | 0.200 | 0.336  |
| BRIB | 2007 | 196 | 9 | 40 | 4.769  | P | 0.200 | 0.173  |
| V04C | 2007 | 196 | 9 | 40 | 4.974  | P | 0.200 | 0.193  |
| SAO  | 2007 | 196 | 9 | 40 | 5.108  | P | 0.200 | 0.117  |
| MHC  | 2007 | 196 | 9 | 40 | 5.753  | P | 0.200 | 0.137  |
| WENL | 2007 | 196 | 9 | 40 | 5.778  | P | 0.200 | 0.308  |
| PHL  | 2007 | 196 | 9 | 40 | 5.786  | P | 0.200 | 0.234  |
| SCZ2 | 2007 | 196 | 9 | 40 | 6.036  | P | 0.200 | -0.159 |
| BDM  | 2007 | 196 | 9 | 40 | 6.187  | P | 0.200 | 0.464  |
| MNRC | 2007 | 196 | 9 | 40 | 6.188  | P | 0.200 | 0.437  |
| PACP | 2007 | 196 | 9 | 40 | 6.364  | P | 0.200 | 0.229  |
| M01C | 2007 | 196 | 9 | 40 | 6.634  | P | 0.200 | 0.427  |
| PKD  | 2007 | 196 | 9 | 40 | 6.798  | P | 0.200 | 0.237  |
| SBC  | 2007 | 196 | 9 | 40 | 6.912  | P | 0.200 | 0.111  |
| S04C | 2007 | 196 | 9 | 40 | 7.052  | P | 0.200 | 0.160  |
| N02C | 2007 | 196 | 9 | 40 | 7.166  | P | 0.200 | 0.285  |
| GASB | 2007 | 196 | 9 | 40 | 7.204  | P | 0.200 | 0.717  |
| U04C | 2007 | 196 | 9 | 40 | 7.250  | P | 0.200 | 0.649  |
| Q03C | 2007 | 196 | 9 | 40 | 7.446  | P | 0.200 | 0.865  |
| K01A | 2007 | 196 | 9 | 40 | 7.669  | P | 0.200 | 0.473  |
| MPP  | 2007 | 196 | 9 | 40 | 7.825  | P | 0.200 | 0.311  |
| O02C | 2007 | 196 | 9 | 40 | 7.839  | P | 0.200 | 0.467  |
| SMM  | 2007 | 196 | 9 | 40 | 7.932  | P | 0.200 | 0.363  |
| SUTB | 2007 | 196 | 9 | 40 | 8.125  | P | 0.200 | -0.748 |
| LGU  | 2007 | 196 | 9 | 40 | 8.406  | P | 0.200 | -0.308 |
| T05C | 2007 | 196 | 9 | 40 | 8.697  | P | 0.200 | 0.597  |
| WDC  | 2007 | 196 | 9 | 40 | 9.072  | P | 0.200 | 0.074  |
| Q04C | 2007 | 196 | 9 | 40 | 9.209  | P | 0.200 | -0.088 |
| O03C | 2007 | 196 | 9 | 40 | 9.239  | P | 0.200 | -0.137 |
| L02A | 2007 | 196 | 9 | 40 | 9.278  | P | 0.200 | 0.418  |
| R04C | 2007 | 196 | 9 | 40 | 9.432  | P | 0.200 | -0.316 |
| V05C | 2007 | 196 | 9 | 40 | 9.537  | P | 0.200 | 0.693  |
| U05C | 2007 | 196 | 9 | 40 | 9.612  | P | 0.200 | 0.687  |
| CIA  | 2007 | 196 | 9 | 40 | 9.621  | P | 0.200 | -0.353 |
| SNC3 | 2007 | 196 | 9 | 40 | 9.770  | P | 0.200 | 0.064  |
| S05C | 2007 | 196 | 9 | 40 | 9.875  | P | 0.200 | -0.379 |
| SNB3 | 2007 | 196 | 9 | 40 | 10.162 | P | 0.200 | -0.203 |
| SNE4 | 2007 | 196 | 9 | 40 | 10.193 | P | 0.200 | -0.117 |
| ORV  | 2007 | 196 | 9 | 40 | 10.216 | P | 0.200 | -0.238 |
| M02C | 2007 | 196 | 9 | 40 | 10.264 | P | 0.200 | 0.575  |
| RPV  | 2007 | 196 | 9 | 40 | 10.306 | P | 0.200 | -0.318 |
| SNG5 | 2007 | 196 | 9 | 40 | 10.416 | P | 0.200 | -0.290 |
| SND4 | 2007 | 196 | 9 | 40 | 10.506 | P | 0.200 | -0.133 |
| K02A | 2007 | 196 | 9 | 40 | 10.657 | P | 0.200 | 0.180  |
| FMP  | 2007 | 196 | 9 | 40 | 10.673 | P | 0.200 | -0.230 |
| DJJ  | 2007 | 196 | 9 | 40 | 10.749 | P | 0.200 | -0.208 |
| SNC4 | 2007 | 196 | 9 | 40 | 10.847 | P | 0.200 | -0.130 |
| TAKO | 2007 | 196 | 9 | 40 | 10.856 | P | 0.200 | 0.151  |
| SNA3 | 2007 | 196 | 9 | 40 | 11.053 | P | 0.200 | 0.190  |
| SN93 | 2007 | 196 | 9 | 40 | 11.061 | P | 0.200 | 0.307  |
| OSI  | 2007 | 196 | 9 | 40 | 11.143 | P | 0.200 | 0.003  |
| SNE5 | 2007 | 196 | 9 | 40 | 11.248 | P | 0.200 | -0.208 |
| VES  | 2007 | 196 | 9 | 40 | 11.294 | P | 0.200 | -0.471 |
| CMB  | 2007 | 196 | 9 | 40 | 11.307 | P | 0.200 | -0.063 |
| YBH  | 2007 | 196 | 9 | 40 | 11.337 | P | 0.200 | 0.413  |
| LAVA | 2007 | 196 | 9 | 40 | 11.405 | P | 0.200 | -0.130 |
| SND5 | 2007 | 196 | 9 | 40 | 11.423 | P | 0.200 | -0.330 |
| DEC  | 2007 | 196 | 9 | 40 | 11.442 | P | 0.200 | -0.308 |

|      |      |     |   |    |        |   |       |        |
|------|------|-----|---|----|--------|---|-------|--------|
| J02A | 2007 | 196 | 9 | 40 | 11.556 | P | 0.200 | 0.095  |
| RCT  | 2007 | 196 | 9 | 40 | 11.604 | P | 0.200 | -0.567 |
| ARV  | 2007 | 196 | 9 | 40 | 11.622 | P | 0.200 | 0.186  |
| T06C | 2007 | 196 | 9 | 40 | 11.667 | P | 0.200 | -0.224 |
| SNC5 | 2007 | 196 | 9 | 40 | 11.711 | P | 0.200 | -0.417 |
| SNA4 | 2007 | 196 | 9 | 40 | 11.718 | P | 0.200 | -0.086 |
| USC  | 2007 | 196 | 9 | 40 | 11.731 | P | 0.200 | 0.351  |
| M03C | 2007 | 196 | 9 | 40 | 11.793 | P | 0.200 | -0.284 |
| PASC | 2007 | 196 | 9 | 40 | 11.855 | P | 0.200 | -0.410 |
| DBO  | 2007 | 196 | 9 | 40 | 12.191 | P | 0.200 | 0.034  |
| SNF6 | 2007 | 196 | 9 | 40 | 12.212 | P | 0.200 | -0.197 |
| SNB5 | 2007 | 196 | 9 | 40 | 12.255 | P | 0.200 | -0.232 |
| HUMO | 2007 | 196 | 9 | 40 | 12.265 | P | 0.200 | 0.265  |
| MWC  | 2007 | 196 | 9 | 40 | 12.638 | P | 0.200 | -0.404 |
| SNE6 | 2007 | 196 | 9 | 40 | 12.654 | P | 0.200 | -0.208 |
| SNG7 | 2007 | 196 | 9 | 40 | 12.662 | P | 0.200 | -0.281 |
| SNA5 | 2007 | 196 | 9 | 40 | 12.747 | P | 0.200 | -0.288 |
| SN63 | 2007 | 196 | 9 | 40 | 12.825 | P | 0.200 | -0.280 |
| S06C | 2007 | 196 | 9 | 40 | 12.838 | P | 0.200 | -0.467 |
| VCS  | 2007 | 196 | 9 | 40 | 12.948 | P | 0.200 | -0.078 |
| CHF  | 2007 | 196 | 9 | 40 | 12.967 | P | 0.200 | -0.277 |
| YO01 | 2007 | 196 | 9 | 40 | 13.016 | P | 0.200 | -0.171 |
| YO02 | 2007 | 196 | 9 | 40 | 13.150 | P | 0.200 | -0.300 |
| HATC | 2007 | 196 | 9 | 40 | 13.230 | P | 0.200 | -0.165 |
| YO03 | 2007 | 196 | 9 | 40 | 13.274 | P | 0.200 | -0.243 |
| SNC6 | 2007 | 196 | 9 | 40 | 13.300 | P | 0.200 | -0.109 |
| P05C | 2007 | 196 | 9 | 40 | 13.333 | P | 0.200 | 0.061  |
| O05C | 2007 | 196 | 9 | 40 | 13.442 | P | 0.200 | 0.145  |
| HELL | 2007 | 196 | 9 | 40 | 13.494 | P | 0.200 | -0.414 |
| YO04 | 2007 | 196 | 9 | 40 | 13.515 | P | 0.200 | -0.214 |
| O04C | 2007 | 196 | 9 | 40 | 13.543 | P | 0.200 | -0.052 |
| SN96 | 2007 | 196 | 9 | 40 | 13.622 | P | 0.200 | -0.198 |
| YO05 | 2007 | 196 | 9 | 40 | 13.627 | P | 0.200 | -0.256 |
| SNB6 | 2007 | 196 | 9 | 40 | 13.646 | P | 0.200 | -0.068 |
| J03A | 2007 | 196 | 9 | 40 | 13.801 | P | 0.200 | 0.427  |
| I03A | 2007 | 196 | 9 | 40 | 13.802 | P | 0.200 | -0.019 |
| SN64 | 2007 | 196 | 9 | 40 | 13.832 | P | 0.200 | -0.188 |
| SNE7 | 2007 | 196 | 9 | 40 | 13.929 | P | 0.200 | 0.000  |
| YO06 | 2007 | 196 | 9 | 40 | 13.970 | P | 0.200 | -0.134 |
| ISA  | 2007 | 196 | 9 | 40 | 13.980 | P | 0.200 | 0.076  |
| M04C | 2007 | 196 | 9 | 40 | 14.019 | P | 0.200 | 0.062  |
| YO07 | 2007 | 196 | 9 | 40 | 14.022 | P | 0.200 | -0.137 |
| R05C | 2007 | 196 | 9 | 40 | 14.107 | P | 0.200 | 0.001  |
| BFS  | 2007 | 196 | 9 | 40 | 14.138 | P | 0.200 | -0.276 |
| SND7 | 2007 | 196 | 9 | 40 | 14.145 | P | 0.200 | 0.153  |
| SNC7 | 2007 | 196 | 9 | 40 | 14.228 | P | 0.200 | 0.104  |
| YO08 | 2007 | 196 | 9 | 40 | 14.234 | P | 0.200 | -0.139 |
| EDW2 | 2007 | 196 | 9 | 40 | 14.360 | P | 0.200 | 0.125  |
| SNB7 | 2007 | 196 | 9 | 40 | 14.371 | P | 0.200 | -0.155 |
| YO09 | 2007 | 196 | 9 | 40 | 14.461 | P | 0.200 | -0.088 |
| L04A | 2007 | 196 | 9 | 40 | 14.471 | P | 0.200 | -0.204 |
| SNF8 | 2007 | 196 | 9 | 40 | 14.500 | P | 0.200 | -0.279 |
| YO10 | 2007 | 196 | 9 | 40 | 14.705 | P | 0.200 | -0.034 |
| SN86 | 2007 | 196 | 9 | 40 | 14.744 | P | 0.200 | 0.005  |
| YO11 | 2007 | 196 | 9 | 40 | 14.938 | P | 0.200 | -0.071 |
| BEK  | 2007 | 196 | 9 | 40 | 15.138 | P | 0.200 | -0.193 |
| SN55 | 2007 | 196 | 9 | 40 | 15.190 | P | 0.200 | -0.142 |
| SN97 | 2007 | 196 | 9 | 40 | 15.272 | P | 0.200 | 0.030  |
| SND8 | 2007 | 196 | 9 | 40 | 15.321 | P | 0.200 | 0.081  |
| M05C | 2007 | 196 | 9 | 40 | 15.422 | P | 0.200 | -0.137 |
| SNF9 | 2007 | 196 | 9 | 40 | 15.434 | P | 0.200 | -0.238 |
| SNA7 | 2007 | 196 | 9 | 40 | 15.500 | P | 0.200 | 0.118  |
| ELFS | 2007 | 196 | 9 | 40 | 15.530 | P | 0.200 | 0.081  |

|      |      |     |   |    |        |   |       |        |
|------|------|-----|---|----|--------|---|-------|--------|
| ADO  | 2007 | 196 | 9 | 40 | 15.762 | P | 0.200 | -0.150 |
| I04A | 2007 | 196 | 9 | 40 | 15.843 | P | 0.200 | -0.390 |
| VTV  | 2007 | 196 | 9 | 40 | 15.924 | P | 0.200 | -0.248 |
| SN87 | 2007 | 196 | 9 | 40 | 15.959 | P | 0.200 | 0.129  |
| K04A | 2007 | 196 | 9 | 40 | 16.017 | P | 0.200 | -0.129 |
| R06C | 2007 | 196 | 9 | 40 | 16.068 | P | 0.200 | 0.218  |
| J04A | 2007 | 196 | 9 | 40 | 16.146 | P | 0.200 | -0.130 |
| SNE9 | 2007 | 196 | 9 | 40 | 16.146 | P | 0.200 | -0.205 |
| SVD  | 2007 | 196 | 9 | 40 | 16.276 | P | 0.200 | -0.071 |
| SND9 | 2007 | 196 | 9 | 40 | 16.517 | P | 0.200 | 0.002  |
| P06A | 2007 | 196 | 9 | 40 | 16.562 | P | 0.200 | 0.042  |
| WCN  | 2007 | 196 | 9 | 40 | 16.565 | P | 0.200 | 0.311  |
| R07C | 2007 | 196 | 9 | 40 | 16.667 | P | 0.200 | 0.073  |
| MLAC | 2007 | 196 | 9 | 40 | 16.694 | P | 0.200 | 0.228  |
| SN98 | 2007 | 196 | 9 | 40 | 16.707 | P | 0.200 | -0.023 |
| LRL  | 2007 | 196 | 9 | 40 | 16.736 | P | 0.200 | 0.147  |
| CWC  | 2007 | 196 | 9 | 40 | 16.994 | P | 0.200 | -0.070 |
| SNB9 | 2007 | 196 | 9 | 40 | 17.155 | P | 0.200 | 0.117  |
| BBR  | 2007 | 196 | 9 | 40 | 17.379 | P | 0.200 | -0.092 |
| M06C | 2007 | 196 | 9 | 40 | 17.513 | P | 0.200 | 0.005  |
| O06A | 2007 | 196 | 9 | 40 | 17.563 | P | 0.200 | -0.135 |
| TIN  | 2007 | 196 | 9 | 40 | 17.595 | P | 0.200 | 0.085  |
| RRX  | 2007 | 196 | 9 | 40 | 17.794 | P | 0.200 | -0.165 |
| L05A | 2007 | 196 | 9 | 40 | 18.166 | P | 0.200 | 0.033  |
| MPM  | 2007 | 196 | 9 | 40 | 18.660 | P | 0.200 | 0.253  |
| N06A | 2007 | 196 | 9 | 40 | 18.733 | P | 0.200 | -0.078 |
| SLA  | 2007 | 196 | 9 | 40 | 18.863 | P | 0.200 | -0.036 |
| Q07A | 2007 | 196 | 9 | 40 | 18.884 | P | 0.200 | 0.056  |
| S08C | 2007 | 196 | 9 | 40 | 19.038 | P | 0.200 | 0.290  |
| J05A | 2007 | 196 | 9 | 40 | 19.264 | P | 0.200 | 0.085  |
| K05A | 2007 | 196 | 9 | 40 | 19.291 | P | 0.200 | 0.072  |
| GSC  | 2007 | 196 | 9 | 40 | 19.519 | P | 0.200 | -0.025 |
| P07A | 2007 | 196 | 9 | 40 | 19.792 | P | 0.200 | 0.024  |
| HEC  | 2007 | 196 | 9 | 40 | 20.183 | P | 0.200 | -0.185 |
| R08A | 2007 | 196 | 9 | 40 | 20.195 | P | 0.200 | -0.101 |
| GRA  | 2007 | 196 | 9 | 40 | 20.560 | P | 0.200 | 0.106  |
| O07A | 2007 | 196 | 9 | 40 | 20.810 | P | 0.200 | -0.192 |
| FUR  | 2007 | 196 | 9 | 40 | 21.229 | P | 0.200 | 0.104  |
| Q08A | 2007 | 196 | 9 | 40 | 21.698 | P | 0.200 | -0.175 |
| N07B | 2007 | 196 | 9 | 40 | 21.760 | P | 0.200 | 0.050  |
| S09A | 2007 | 196 | 9 | 40 | 22.223 | P | 0.200 | -0.163 |
| SHO  | 2007 | 196 | 9 | 40 | 22.265 | P | 0.200 | -0.247 |
| M07A | 2007 | 196 | 9 | 40 | 22.293 | P | 0.200 | 0.000  |
| P08A | 2007 | 196 | 9 | 40 | 22.961 | P | 0.200 | 0.054  |
| TUQ  | 2007 | 196 | 9 | 40 | 23.046 | P | 0.200 | -0.069 |
| L07A | 2007 | 196 | 9 | 40 | 23.182 | P | 0.200 | 0.253  |
| U10A | 2007 | 196 | 9 | 40 | 23.467 | P | 0.200 | 0.285  |
| R09A | 2007 | 196 | 9 | 40 | 23.771 | P | 0.200 | -0.126 |
| O08A | 2007 | 196 | 9 | 40 | 23.792 | P | 0.200 | 0.082  |
| Q09A | 2007 | 196 | 9 | 40 | 24.388 | P | 0.200 | -0.010 |
| TPNV | 2007 | 196 | 9 | 40 | 24.462 | P | 0.200 | -0.032 |
| N08A | 2007 | 196 | 9 | 40 | 24.656 | P | 0.200 | 0.109  |
| S10A | 2007 | 196 | 9 | 40 | 24.927 | P | 0.200 | -0.089 |
| V11A | 2007 | 196 | 9 | 40 | 25.507 | P | 0.200 | 0.013  |
| P09A | 2007 | 196 | 9 | 40 | 25.645 | P | 0.200 | -0.115 |
| R10A | 2007 | 196 | 9 | 40 | 26.722 | P | 0.200 | 0.115  |
| O09A | 2007 | 196 | 9 | 40 | 26.811 | P | 0.200 | 0.155  |
| U11A | 2007 | 196 | 9 | 40 | 26.848 | P | 0.200 | 0.225  |
| Q10A | 2007 | 196 | 9 | 40 | 27.203 | P | 0.200 | 0.069  |
| S11A | 2007 | 196 | 9 | 40 | 27.257 | P | 0.200 | -0.107 |
| P10A | 2007 | 196 | 9 | 40 | 28.149 | P | 0.200 | -0.161 |
| T11A | 2007 | 196 | 9 | 40 | 28.779 | P | 0.200 | 0.229  |
| R11A | 2007 | 196 | 9 | 40 | 29.147 | P | 0.200 | -0.026 |



|      |      |     |    |         |           |   |           |         |     |       |
|------|------|-----|----|---------|-----------|---|-----------|---------|-----|-------|
| Q11A | 2007 | 196 | 9  | 40      | 29.739    | P | 0.200     | -0.010  |     |       |
| 1988 | 223  | 4   | 38 | 28.1078 | -10.21300 |   | 160.77000 | 38.0000 | 422 | 0.002 |
| arc  | 1988 | 223 | 4  | 51      | 17.550    | P | 0.200     | -0.453  |     |       |
| bmd  | 1988 | 223 | 4  | 51      | 17.500    | P | 0.200     | -0.417  |     |       |
| ccr  | 1988 | 223 | 4  | 51      | 16.920    | P | 0.200     | -0.039  |     |       |
| jhn  | 1988 | 223 | 4  | 51      | 16.400    | P | 0.200     | -0.729  |     |       |
| pmt  | 1988 | 223 | 4  | 51      | 17.600    | P | 0.200     | -0.916  |     |       |
| WMD  | 1988 | 223 | 4  | 51      | 17.520    | P | 0.200     | 0.072   |     |       |
| cou  | 1988 | 223 | 4  | 51      | 18.500    | P | 0.200     | -0.019  |     |       |
| jun  | 1988 | 223 | 4  | 51      | 18.200    | P | 0.200     | -0.188  |     |       |
| twr  | 1988 | 223 | 4  | 51      | 17.750    | P | 0.200     | -0.318  |     |       |
| wil  | 1988 | 223 | 4  | 51      | 17.570    | P | 0.200     | -0.341  |     |       |
| BNP  | 1988 | 223 | 4  | 51      | 20.150    | P | 0.200     | -0.002  |     |       |
| CLC  | 1988 | 223 | 4  | 51      | 20.400    | P | 0.200     | 0.078   |     |       |
| DTP  | 1988 | 223 | 4  | 51      | 19.180    | P | 0.200     | 0.418   |     |       |
| FRI  | 1988 | 223 | 4  | 51      | 13.600    | P | 0.200     | -0.170  |     |       |
| GSC  | 1988 | 223 | 4  | 51      | 22.700    | P | 0.200     | -0.040  |     |       |
| ISA  | 1988 | 223 | 4  | 51      | 16.900    | P | 0.200     | 0.077   |     |       |
| JAW  | 1988 | 223 | 4  | 51      | 18.500    | P | 0.200     | 0.361   |     |       |
| JFS  | 1988 | 223 | 4  | 51      | 19.750    | P | 0.200     | 0.185   |     |       |
| SRT  | 1988 | 223 | 4  | 51      | 20.000    | P | 0.200     | 0.380   |     |       |
| TEJ  | 1988 | 223 | 4  | 51      | 15.900    | P | 0.200     | 0.329   |     |       |
| TOW  | 1988 | 223 | 4  | 51      | 20.050    | P | 0.200     | 0.395   |     |       |
| WAS  | 1988 | 223 | 4  | 51      | 16.600    | P | 0.200     | -0.302  |     |       |
| WBS  | 1988 | 223 | 4  | 51      | 18.300    | P | 0.200     | 0.173   |     |       |
| WCH  | 1988 | 223 | 4  | 51      | 18.800    | P | 0.200     | -0.127  |     |       |
| WCS  | 1988 | 223 | 4  | 51      | 20.000    | P | 0.200     | 0.054   |     |       |
| WHF  | 1988 | 223 | 4  | 51      | 17.320    | P | 0.200     | -0.036  |     |       |
| WHS  | 1988 | 223 | 4  | 51      | 20.150    | P | 0.200     | -0.005  |     |       |
| WHV  | 1988 | 223 | 4  | 51      | 16.750    | P | 0.200     | 0.219   |     |       |
| WJP  | 1988 | 223 | 4  | 51      | 16.950    | P | 0.200     | 0.320   |     |       |
| WLH  | 1988 | 223 | 4  | 51      | 17.950    | P | 0.200     | -0.281  |     |       |
| WMF  | 1988 | 223 | 4  | 51      | 19.900    | P | 0.200     | 0.156   |     |       |
| WOF  | 1988 | 223 | 4  | 51      | 16.000    | P | 0.200     | 0.003   |     |       |
| WOR  | 1988 | 223 | 4  | 51      | 17.700    | P | 0.200     | -0.103  |     |       |
| WSC  | 1988 | 223 | 4  | 51      | 19.200    | P | 0.200     | 0.084   |     |       |
| WVP  | 1988 | 223 | 4  | 51      | 19.800    | P | 0.200     | 0.169   |     |       |
| XMS  | 1988 | 223 | 4  | 51      | 21.180    | P | 0.200     | 0.292   |     |       |
| BLK  | 1988 | 223 | 4  | 51      | 21.390    | P | 0.200     | 0.443   |     |       |
| BMT  | 1988 | 223 | 4  | 51      | 16.250    | P | 0.200     | 0.460   |     |       |
| FLS  | 1988 | 223 | 4  | 51      | 21.580    | P | 0.200     | 0.033   |     |       |
| HOD  | 1988 | 223 | 4  | 51      | 20.480    | P | 0.200     | -0.214  |     |       |
| 1988 | 205  | 15  | 17 | 12.9661 | -6.55000  |   | 152.76801 | 34.0000 | 413 | 0.001 |
| bmd  | 1988 | 205 | 15 | 30      | 22.630    | P | 0.200     | -0.482  |     |       |
| mnk  | 1988 | 205 | 15 | 30      | 21.820    | P | 0.200     | -0.431  |     |       |
| ndl  | 1988 | 205 | 15 | 30      | 21.800    | P | 0.200     | -0.713  |     |       |
| pmt  | 1988 | 205 | 15 | 30      | 23.090    | P | 0.200     | -0.545  |     |       |
| bar  | 1988 | 205 | 15 | 30      | 22.400    | P | 0.200     | -0.334  |     |       |
| jun  | 1988 | 205 | 15 | 30      | 22.820    | P | 0.200     | -0.325  |     |       |
| twr  | 1988 | 205 | 15 | 30      | 22.570    | P | 0.200     | -0.397  |     |       |
| BMT  | 1988 | 205 | 15 | 30      | 22.080    | P | 0.200     | 0.618   |     |       |
| CLC  | 1988 | 205 | 15 | 30      | 25.570    | P | 0.200     | -0.010  |     |       |
| DTP  | 1988 | 205 | 15 | 30      | 24.830    | P | 0.200     | 0.467   |     |       |
| FRI  | 1988 | 205 | 15 | 30      | 17.850    | P | 0.200     | -0.404  |     |       |
| GSC  | 1988 | 205 | 15 | 30      | 28.500    | P | 0.200     | 0.205   |     |       |
| ISA  | 1988 | 205 | 15 | 30      | 22.050    | P | 0.200     | -0.106  |     |       |
| JAW  | 1988 | 205 | 15 | 30      | 23.990    | P | 0.200     | 0.311   |     |       |
| LRM  | 1988 | 205 | 15 | 30      | 25.350    | P | 0.200     | 0.251   |     |       |
| TEJ  | 1988 | 205 | 15 | 30      | 21.490    | P | 0.200     | 0.311   |     |       |
| WBS  | 1988 | 205 | 15 | 30      | 23.680    | P | 0.200     | 0.155   |     |       |
| WCH  | 1988 | 205 | 15 | 30      | 23.800    | P | 0.200     | -0.317  |     |       |

|     |      |     |    |    |        |   |       |        |
|-----|------|-----|----|----|--------|---|-------|--------|
| WCS | 1988 | 205 | 15 | 30 | 25.130 | P | 0.200 | 0.065  |
| WHS | 1988 | 205 | 15 | 30 | 25.180 | P | 0.200 | -0.032 |
| WHV | 1988 | 205 | 15 | 30 | 22.000 | P | 0.200 | 0.016  |
| WMF | 1988 | 205 | 15 | 30 | 24.840 | P | 0.200 | 0.021  |
| WOF | 1988 | 205 | 15 | 30 | 21.150 | P | 0.200 | -0.250 |
| WOR | 1988 | 205 | 15 | 30 | 22.900 | P | 0.200 | -0.220 |
| WRC | 1988 | 205 | 15 | 30 | 25.500 | P | 0.200 | 0.143  |
| WRV | 1988 | 205 | 15 | 30 | 24.480 | P | 0.200 | -0.120 |
| WSC | 1988 | 205 | 15 | 30 | 24.450 | P | 0.200 | 0.012  |
| WVP | 1988 | 205 | 15 | 30 | 24.900 | P | 0.200 | 0.089  |
| XMS | 1988 | 205 | 15 | 30 | 26.620 | P | 0.200 | 0.322  |
| BLK | 1988 | 205 | 15 | 30 | 27.020 | P | 0.200 | 0.381  |
| FLS | 1988 | 205 | 15 | 30 | 27.440 | P | 0.200 | 0.134  |
| HOD | 1988 | 205 | 15 | 30 | 26.470 | P | 0.200 | -0.055 |
| SBK | 1988 | 205 | 15 | 30 | 25.580 | P | 0.200 | 0.202  |
| SRT | 1988 | 205 | 15 | 30 | 25.200 | P | 0.200 | 0.252  |
| TOW | 1988 | 205 | 15 | 30 | 25.220 | P | 0.200 | 0.310  |
| WBM | 1988 | 205 | 15 | 30 | 24.590 | P | 0.200 | 0.195  |
| WJP | 1988 | 205 | 15 | 30 | 22.380 | P | 0.200 | 0.280  |

|      |      |     |    |         |          |           |         |        |       |
|------|------|-----|----|---------|----------|-----------|---------|--------|-------|
| 2005 | 252  | 7   | 26 | 43.6168 | -4.53900 | 153.47400 | 90.0000 | 18     | 0.000 |
| JCC  | 2005 | 252 | 7  | 39      | 20.980   | P         | 0.200   | 0.637  |       |
| FARB | 2005 | 252 | 7  | 39      | 21.630   | P         | 0.200   | -0.419 |       |
| P01C | 2005 | 252 | 7  | 39      | 22.319   | P         | 0.200   | 0.319  |       |
| TAKO | 2005 | 252 | 7  | 39      | 22.485   | P         | 0.200   | 0.351  |       |
| HOPS | 2005 | 252 | 7  | 39      | 22.780   | P         | 0.200   | 0.092  |       |
| N02C | 2005 | 252 | 7  | 39      | 23.659   | P         | 0.200   | 0.691  |       |
| CVS  | 2005 | 252 | 7  | 39      | 24.129   | P         | 0.200   | -0.501 |       |
| JRSC | 2005 | 252 | 7  | 39      | 24.787   | P         | 0.200   | -0.006 |       |
| BNLO | 2005 | 252 | 7  | 39      | 24.824   | P         | 0.200   | -0.123 |       |
| BRK  | 2005 | 252 | 7  | 39      | 24.828   | P         | 0.200   | -0.184 |       |
| BKS  | 2005 | 252 | 7  | 39      | 25.073   | P         | 0.200   | -0.062 |       |
| MNRC | 2005 | 252 | 7  | 39      | 25.353   | P         | 0.200   | 0.344  |       |
| BRIB | 2005 | 252 | 7  | 39      | 25.357   | P         | 0.200   | 0.034  |       |
| M02C | 2005 | 252 | 7  | 39      | 25.714   | P         | 0.200   | 0.740  |       |
| WDC  | 2005 | 252 | 7  | 39      | 25.719   | P         | 0.200   | 0.189  |       |
| HUMO | 2005 | 252 | 7  | 39      | 25.868   | P         | 0.200   | 0.509  |       |
| YBH  | 2005 | 252 | 7  | 39      | 26.275   | P         | 0.200   | 0.567  |       |
| BDM  | 2005 | 252 | 7  | 39      | 26.831   | P         | 0.200   | 0.394  |       |
| WENL | 2005 | 252 | 7  | 39      | 26.846   | P         | 0.200   | 0.130  |       |
| O03C | 2005 | 252 | 7  | 39      | 26.937   | P         | 0.200   | 0.019  |       |
| SUTB | 2005 | 252 | 7  | 39      | 26.985   | P         | 0.200   | -0.573 |       |
| Q03C | 2005 | 252 | 7  | 39      | 27.020   | P         | 0.200   | 0.797  |       |
| HAST | 2005 | 252 | 7  | 39      | 27.084   | P         | 0.200   | 0.229  |       |
| MHC  | 2005 | 252 | 7  | 39      | 27.264   | P         | 0.200   | 0.014  |       |
| SAO  | 2005 | 252 | 7  | 39      | 27.436   | P         | 0.200   | -0.082 |       |
| M03C | 2005 | 252 | 7  | 39      | 27.555   | P         | 0.200   | -0.025 |       |
| V03C | 2005 | 252 | 7  | 39      | 28.276   | P         | 0.200   | 0.437  |       |
| PACP | 2005 | 252 | 7  | 39      | 28.505   | P         | 0.200   | 0.196  |       |
| S04C | 2005 | 252 | 7  | 39      | 28.517   | P         | 0.200   | 0.203  |       |
| ORV  | 2005 | 252 | 7  | 39      | 28.542   | P         | 0.200   | -0.176 |       |
| Q04C | 2005 | 252 | 7  | 39      | 28.650   | P         | 0.200   | -0.001 |       |
| M04C | 2005 | 252 | 7  | 39      | 28.881   | P         | 0.200   | 0.129  |       |
| V04C | 2005 | 252 | 7  | 39      | 29.358   | P         | 0.200   | 0.305  |       |
| RAMR | 2005 | 252 | 7  | 39      | 29.358   | P         | 0.200   | 0.308  |       |
| HATC | 2005 | 252 | 7  | 39      | 29.566   | P         | 0.200   | -0.087 |       |
| R04C | 2005 | 252 | 7  | 39      | 29.747   | P         | 0.200   | -0.299 |       |
| SDP  | 2005 | 252 | 7  | 39      | 30.178   | P         | 0.200   | 0.088  |       |
| U04C | 2005 | 252 | 7  | 39      | 30.303   | P         | 0.200   | 0.475  |       |
| PKD  | 2005 | 252 | 7  | 39      | 30.600   | P         | 0.200   | 0.184  |       |
| O04C | 2005 | 252 | 7  | 39      | 30.675   | P         | 0.200   | -0.044 |       |
| LAVA | 2005 | 252 | 7  | 39      | 30.915   | P         | 0.200   | -0.153 |       |
| M05C | 2005 | 252 | 7  | 39      | 31.059   | P         | 0.200   | -0.028 |       |

|      |      |     |   |    |        |   |       |        |
|------|------|-----|---|----|--------|---|-------|--------|
| O05C | 2005 | 252 | 7 | 39 | 31.188 | P | 0.200 | 0.246  |
| SN71 | 2005 | 252 | 7 | 39 | 31.240 | P | 0.200 | -0.420 |
| S05C | 2005 | 252 | 7 | 39 | 31.420 | P | 0.200 | -0.502 |
| CMB  | 2005 | 252 | 7 | 39 | 31.943 | P | 0.200 | -0.040 |
| P05C | 2005 | 252 | 7 | 39 | 32.113 | P | 0.200 | 0.121  |
| ELFS | 2005 | 252 | 7 | 39 | 32.241 | P | 0.200 | 0.125  |
| SN95 | 2005 | 252 | 7 | 39 | 32.524 | P | 0.200 | -0.321 |
| SN84 | 2005 | 252 | 7 | 39 | 32.626 | P | 0.200 | -0.537 |
| SN73 | 2005 | 252 | 7 | 39 | 32.647 | P | 0.200 | -0.344 |
| U05C | 2005 | 252 | 7 | 39 | 32.666 | P | 0.200 | 0.487  |
| SMM  | 2005 | 252 | 7 | 39 | 32.708 | P | 0.200 | 0.361  |
| SN51 | 2005 | 252 | 7 | 39 | 32.727 | P | 0.200 | -0.038 |
| SN62 | 2005 | 252 | 7 | 39 | 32.780 | P | 0.200 | -0.529 |
| SCZ2 | 2005 | 252 | 7 | 39 | 32.884 | P | 0.200 | -0.183 |
| SBC  | 2005 | 252 | 7 | 39 | 33.128 | P | 0.200 | 0.208  |
| MPP  | 2005 | 252 | 7 | 39 | 33.254 | P | 0.200 | 0.255  |
| M06C | 2005 | 252 | 7 | 39 | 33.359 | P | 0.200 | 0.038  |
| V05C | 2005 | 252 | 7 | 39 | 33.364 | P | 0.200 | 0.605  |
| SNCC | 2005 | 252 | 7 | 39 | 33.431 | P | 0.200 | 0.206  |
| SN52 | 2005 | 252 | 7 | 39 | 33.515 | P | 0.200 | -0.311 |
| SN74 | 2005 | 252 | 7 | 39 | 33.529 | P | 0.200 | -0.281 |
| SN85 | 2005 | 252 | 7 | 39 | 33.737 | P | 0.200 | -0.204 |
| T06C | 2005 | 252 | 7 | 39 | 33.754 | P | 0.200 | -0.336 |
| R05C | 2005 | 252 | 7 | 39 | 33.840 | P | 0.200 | 0.127  |
| SN63 | 2005 | 252 | 7 | 39 | 33.867 | P | 0.200 | -0.371 |
| SN53 | 2005 | 252 | 7 | 39 | 34.206 | P | 0.200 | -0.394 |
| SN42 | 2005 | 252 | 7 | 39 | 34.392 | P | 0.200 | -0.262 |
| SN86 | 2005 | 252 | 7 | 39 | 34.715 | P | 0.200 | 0.029  |
| SN11 | 2005 | 252 | 7 | 39 | 34.788 | P | 0.200 | -0.554 |
| RCT  | 2005 | 252 | 7 | 39 | 34.823 | P | 0.200 | -0.582 |
| LGU  | 2005 | 252 | 7 | 39 | 35.016 | P | 0.200 | -0.302 |
| SN22 | 2005 | 252 | 7 | 39 | 35.093 | P | 0.200 | -0.443 |
| SN43 | 2005 | 252 | 7 | 39 | 35.110 | P | 0.200 | -0.239 |
| SN44 | 2005 | 252 | 7 | 39 | 35.952 | P | 0.200 | -0.102 |
| R06C | 2005 | 252 | 7 | 39 | 36.016 | P | 0.200 | 0.229  |
| SN23 | 2005 | 252 | 7 | 39 | 36.030 | P | 0.200 | -0.228 |
| HELL | 2005 | 252 | 7 | 39 | 36.151 | P | 0.200 | -0.470 |
| SN66 | 2005 | 252 | 7 | 39 | 36.266 | P | 0.200 | 0.036  |
| ARV  | 2005 | 252 | 7 | 39 | 36.684 | P | 0.200 | 0.127  |
| SN45 | 2005 | 252 | 7 | 39 | 36.897 | P | 0.200 | -0.019 |
| SN56 | 2005 | 252 | 7 | 39 | 36.903 | P | 0.200 | 0.058  |
| OSI  | 2005 | 252 | 7 | 39 | 36.980 | P | 0.200 | 0.029  |
| SN67 | 2005 | 252 | 7 | 39 | 37.011 | P | 0.200 | 0.101  |
| SN24 | 2005 | 252 | 7 | 39 | 37.134 | P | 0.200 | -0.013 |
| R07C | 2005 | 252 | 7 | 39 | 37.246 | P | 0.200 | 0.024  |
| CIA  | 2005 | 252 | 7 | 39 | 37.286 | P | 0.200 | -0.307 |
| SN57 | 2005 | 252 | 7 | 39 | 37.610 | P | 0.200 | 0.141  |
| SN46 | 2005 | 252 | 7 | 39 | 37.699 | P | 0.200 | -0.062 |
| FMP  | 2005 | 252 | 7 | 39 | 37.867 | P | 0.200 | -0.173 |
| DEC  | 2005 | 252 | 7 | 39 | 37.872 | P | 0.200 | -0.288 |
| ISA  | 2005 | 252 | 7 | 39 | 38.087 | P | 0.200 | -0.085 |
| SN25 | 2005 | 252 | 7 | 39 | 38.300 | P | 0.200 | 0.027  |
| SN47 | 2005 | 252 | 7 | 39 | 38.307 | P | 0.200 | -0.047 |
| SN36 | 2005 | 252 | 7 | 39 | 38.639 | P | 0.200 | 0.096  |
| SN15 | 2005 | 252 | 7 | 39 | 38.653 | P | 0.200 | 0.146  |
| SN48 | 2005 | 252 | 7 | 39 | 38.951 | P | 0.200 | -0.061 |
| SN37 | 2005 | 252 | 7 | 39 | 38.961 | P | 0.200 | 0.020  |
| SN26 | 2005 | 252 | 7 | 39 | 39.077 | P | 0.200 | 0.115  |
| SN38 | 2005 | 252 | 7 | 39 | 39.601 | P | 0.200 | -0.106 |
| TIN  | 2005 | 252 | 7 | 39 | 39.724 | P | 0.200 | 0.002  |
| EDW2 | 2005 | 252 | 7 | 39 | 39.898 | P | 0.200 | 0.196  |
| SN16 | 2005 | 252 | 7 | 39 | 39.942 | P | 0.200 | 0.122  |
| CWC  | 2005 | 252 | 7 | 39 | 40.099 | P | 0.200 | -0.054 |

|      |      |     |   |    |        |   |       |        |
|------|------|-----|---|----|--------|---|-------|--------|
| SN28 | 2005 | 252 | 7 | 39 | 40.303 | P | 0.200 | 0.020  |
| S08C | 2005 | 252 | 7 | 39 | 40.556 | P | 0.200 | 0.228  |
| BFS  | 2005 | 252 | 7 | 39 | 40.689 | P | 0.200 | -0.145 |
| LRL  | 2005 | 252 | 7 | 39 | 41.287 | P | 0.200 | 0.104  |
| MPM  | 2005 | 252 | 7 | 39 | 42.258 | P | 0.200 | 0.118  |
| GRA  | 2005 | 252 | 7 | 39 | 42.777 | P | 0.200 | 0.024  |
| TPH  | 2005 | 252 | 7 | 39 | 43.453 | P | 0.200 | -0.342 |
| RRX  | 2005 | 252 | 7 | 39 | 43.460 | P | 0.200 | 0.072  |
| BBR  | 2005 | 252 | 7 | 39 | 43.651 | P | 0.200 | -0.220 |
| FUR  | 2005 | 252 | 7 | 39 | 44.360 | P | 0.200 | 0.068  |
| GSC  | 2005 | 252 | 7 | 39 | 44.412 | P | 0.200 | 0.023  |
| HEC  | 2005 | 252 | 7 | 39 | 45.789 | P | 0.200 | -0.158 |
| SHO  | 2005 | 252 | 7 | 39 | 46.219 | P | 0.200 | -0.272 |
| TUQ  | 2005 | 252 | 7 | 39 | 47.599 | P | 0.200 | -0.208 |

|      |      |     |    |         |          |           |         |        |       |
|------|------|-----|----|---------|----------|-----------|---------|--------|-------|
| 2005 | 345  | 14  | 20 | 44.4785 | -6.56800 | 152.19501 | 10.0000 | 44     | 0.006 |
| JCC  | 2005 | 345 | 14 | 33      | 42.647   | P         | 0.200   | 0.370  |       |
| O01C | 2005 | 345 | 14 | 33      | 43.041   | P         | 0.200   | 0.532  |       |
| FARB | 2005 | 345 | 14 | 33      | 43.520   | P         | 0.200   | -0.234 |       |
| P01C | 2005 | 345 | 14 | 33      | 43.974   | P         | 0.200   | 0.159  |       |
| TAKO | 2005 | 345 | 14 | 33      | 44.065   | P         | 0.200   | -0.118 |       |
| HOPS | 2005 | 345 | 14 | 33      | 44.444   | P         | 0.200   | -0.022 |       |
| N02C | 2005 | 345 | 14 | 33      | 45.126   | P         | 0.200   | 0.282  |       |
| CVS  | 2005 | 345 | 14 | 33      | 45.870   | P         | 0.200   | -0.466 |       |
| JRSC | 2005 | 345 | 14 | 33      | 46.312   | P         | 0.200   | -0.113 |       |
| DBO  | 2005 | 345 | 14 | 33      | 46.322   | P         | 0.200   | -0.358 |       |
| BRK  | 2005 | 345 | 14 | 33      | 46.331   | P         | 0.200   | -0.337 |       |
| I03A | 2005 | 345 | 14 | 33      | 46.497   | P         | 0.200   | -0.517 |       |
| BNLO | 2005 | 345 | 14 | 33      | 46.529   | P         | 0.200   | -0.032 |       |
| BKS  | 2005 | 345 | 14 | 33      | 46.625   | P         | 0.200   | -0.169 |       |
| GASB | 2005 | 345 | 14 | 33      | 46.957   | P         | 0.200   | 0.663  |       |
| MNRC | 2005 | 345 | 14 | 33      | 47.073   | P         | 0.200   | 0.334  |       |
| M02C | 2005 | 345 | 14 | 33      | 47.130   | P         | 0.200   | 0.288  |       |
| BRIB | 2005 | 345 | 14 | 33      | 47.157   | P         | 0.200   | 0.177  |       |
| HUMO | 2005 | 345 | 14 | 33      | 47.192   | P         | 0.200   | -0.100 |       |
| WDC  | 2005 | 345 | 14 | 33      | 47.280   | P         | 0.200   | -0.065 |       |
| YBH  | 2005 | 345 | 14 | 33      | 47.649   | P         | 0.200   | 0.063  |       |
| O03C | 2005 | 345 | 14 | 33      | 48.343   | P         | 0.200   | -0.333 |       |
| BDM  | 2005 | 345 | 14 | 33      | 48.417   | P         | 0.200   | 0.336  |       |
| WENL | 2005 | 345 | 14 | 33      | 48.457   | P         | 0.200   | 0.124  |       |
| SUTB | 2005 | 345 | 14 | 33      | 48.588   | P         | 0.200   | -0.683 |       |
| HAST | 2005 | 345 | 14 | 33      | 48.659   | P         | 0.200   | 0.271  |       |
| Q03C | 2005 | 345 | 14 | 33      | 48.703   | P         | 0.200   | 0.789  |       |
| M03C | 2005 | 345 | 14 | 33      | 48.929   | P         | 0.200   | -0.478 |       |
| MHC  | 2005 | 345 | 14 | 33      | 48.953   | P         | 0.200   | 0.104  |       |
| SAO  | 2005 | 345 | 14 | 33      | 49.079   | P         | 0.200   | 0.010  |       |
| S04C | 2005 | 345 | 14 | 33      | 50.000   | P         | 0.200   | 0.092  |       |
| V03C | 2005 | 345 | 14 | 33      | 50.011   | P         | 0.200   | 0.680  |       |
| ORV  | 2005 | 345 | 14 | 33      | 50.049   | P         | 0.200   | -0.384 |       |
| PACP | 2005 | 345 | 14 | 33      | 50.055   | P         | 0.200   | 0.189  |       |
| Q04C | 2005 | 345 | 14 | 33      | 50.213   | P         | 0.200   | -0.111 |       |
| M04C | 2005 | 345 | 14 | 33      | 50.414   | P         | 0.200   | -0.177 |       |
| HATC | 2005 | 345 | 14 | 33      | 51.036   | P         | 0.200   | -0.402 |       |
| V04C | 2005 | 345 | 14 | 33      | 51.049   | P         | 0.200   | 0.541  |       |
| RAMR | 2005 | 345 | 14 | 33      | 51.049   | P         | 0.200   | 0.543  |       |
| R04C | 2005 | 345 | 14 | 33      | 51.155   | P         | 0.200   | -0.514 |       |
| U04C | 2005 | 345 | 14 | 33      | 51.837   | P         | 0.200   | 0.508  |       |
| PKD  | 2005 | 345 | 14 | 33      | 52.146   | P         | 0.200   | 0.269  |       |
| O04C | 2005 | 345 | 14 | 33      | 52.204   | P         | 0.200   | -0.256 |       |
| M05C | 2005 | 345 | 14 | 33      | 52.393   | P         | 0.200   | -0.490 |       |
| T05C | 2005 | 345 | 14 | 33      | 52.489   | P         | 0.200   | 0.518  |       |
| LAVA | 2005 | 345 | 14 | 33      | 52.493   | P         | 0.200   | -0.221 |       |
| O05C | 2005 | 345 | 14 | 33      | 52.540   | P         | 0.200   | -0.118 |       |

|      |      |     |    |    |        |   |       |        |
|------|------|-----|----|----|--------|---|-------|--------|
| SN71 | 2005 | 345 | 14 | 33 | 52.787 | P | 0.200 | -0.438 |
| S05C | 2005 | 345 | 14 | 33 | 53.046 | P | 0.200 | -0.417 |
| CMB  | 2005 | 345 | 14 | 33 | 53.414 | P | 0.200 | -0.157 |
| P05C | 2005 | 345 | 14 | 33 | 53.666 | P | 0.200 | 0.009  |
| ELFS | 2005 | 345 | 14 | 33 | 53.820 | P | 0.200 | -0.035 |
| SN95 | 2005 | 345 | 14 | 33 | 54.057 | P | 0.200 | -0.386 |
| SN73 | 2005 | 345 | 14 | 33 | 54.194 | P | 0.200 | -0.357 |
| U05C | 2005 | 345 | 14 | 33 | 54.269 | P | 0.200 | 0.619  |
| SN51 | 2005 | 345 | 14 | 33 | 54.336 | P | 0.200 | 0.052  |
| SN62 | 2005 | 345 | 14 | 33 | 54.357 | P | 0.200 | -0.488 |
| SMM  | 2005 | 345 | 14 | 33 | 54.387 | P | 0.200 | 0.640  |
| SCZ2 | 2005 | 345 | 14 | 33 | 54.653 | P | 0.200 | 0.308  |
| M06C | 2005 | 345 | 14 | 33 | 54.857 | P | 0.200 | -0.221 |
| SN52 | 2005 | 345 | 14 | 33 | 54.869 | P | 0.200 | -0.474 |
| SBC  | 2005 | 345 | 14 | 33 | 54.983 | P | 0.200 | 0.743  |
| V05C | 2005 | 345 | 14 | 33 | 55.076 | P | 0.200 | 0.892  |
| SN85 | 2005 | 345 | 14 | 33 | 55.205 | P | 0.200 | -0.312 |
| S06C | 2005 | 345 | 14 | 33 | 55.224 | P | 0.200 | -0.483 |
| R05C | 2005 | 345 | 14 | 33 | 55.237 | P | 0.200 | -0.084 |
| T06C | 2005 | 345 | 14 | 33 | 55.282 | P | 0.200 | -0.299 |
| SN53 | 2005 | 345 | 14 | 33 | 55.766 | P | 0.200 | -0.352 |
| SN64 | 2005 | 345 | 14 | 33 | 56.245 | P | 0.200 | -0.259 |
| SN11 | 2005 | 345 | 14 | 33 | 56.331 | P | 0.200 | -0.472 |
| SN86 | 2005 | 345 | 14 | 33 | 56.339 | P | 0.200 | 0.068  |
| RCT  | 2005 | 345 | 14 | 33 | 56.437 | P | 0.200 | -0.404 |
| SN43 | 2005 | 345 | 14 | 33 | 56.556 | P | 0.200 | -0.302 |
| SN22 | 2005 | 345 | 14 | 33 | 56.608 | P | 0.200 | -0.411 |
| LGU  | 2005 | 345 | 14 | 33 | 56.669 | P | 0.200 | 0.080  |
| VES  | 2005 | 345 | 14 | 33 | 56.698 | P | 0.200 | -0.481 |
| SN54 | 2005 | 345 | 14 | 33 | 56.716 | P | 0.200 | -0.163 |
| SN76 | 2005 | 345 | 14 | 33 | 57.124 | P | 0.200 | -0.102 |
| SN44 | 2005 | 345 | 14 | 33 | 57.395 | P | 0.200 | -0.172 |
| SN23 | 2005 | 345 | 14 | 33 | 57.497 | P | 0.200 | -0.251 |
| SN55 | 2005 | 345 | 14 | 33 | 57.587 | P | 0.200 | -0.151 |
| R06C | 2005 | 345 | 14 | 33 | 57.678 | P | 0.200 | 0.311  |
| HELL | 2005 | 345 | 14 | 33 | 57.732 | P | 0.200 | -0.342 |
| ARV  | 2005 | 345 | 14 | 33 | 58.151 | P | 0.200 | 0.255  |
| SN34 | 2005 | 345 | 14 | 33 | 58.227 | P | 0.200 | -0.208 |
| SN45 | 2005 | 345 | 14 | 33 | 58.394 | P | 0.200 | -0.041 |
| OSI  | 2005 | 345 | 14 | 33 | 58.657 | P | 0.200 | 0.401  |
| R07C | 2005 | 345 | 14 | 33 | 58.817 | P | 0.200 | 0.056  |
| CIA  | 2005 | 345 | 14 | 33 | 59.061 | P | 0.200 | 0.267  |
| SN57 | 2005 | 345 | 14 | 33 | 59.131 | P | 0.200 | 0.120  |
| SN46 | 2005 | 345 | 14 | 33 | 59.196 | P | 0.200 | -0.087 |
| DEC  | 2005 | 345 | 14 | 33 | 59.457 | P | 0.200 | 0.053  |
| FMP  | 2005 | 345 | 14 | 33 | 59.711 | P | 0.200 | 0.456  |
| SN25 | 2005 | 345 | 14 | 33 | 59.713 | P | 0.200 | -0.035 |
| SN47 | 2005 | 345 | 14 | 33 | 59.759 | P | 0.200 | -0.109 |
| SN15 | 2005 | 345 | 14 | 34 | 0.107  | P | 0.200 | 0.140  |
| SN36 | 2005 | 345 | 14 | 34 | 0.120  | P | 0.200 | 0.081  |
| SN48 | 2005 | 345 | 14 | 34 | 0.409  | P | 0.200 | -0.117 |
| SN37 | 2005 | 345 | 14 | 34 | 0.447  | P | 0.200 | 0.015  |
| SN26 | 2005 | 345 | 14 | 34 | 0.496  | P | 0.200 | 0.055  |
| SN38 | 2005 | 345 | 14 | 34 | 1.045  | P | 0.200 | -0.159 |
| TIN  | 2005 | 345 | 14 | 34 | 1.200  | P | 0.200 | 0.052  |
| EDW2 | 2005 | 345 | 14 | 34 | 1.467  | P | 0.200 | 0.491  |
| CWC  | 2005 | 345 | 14 | 34 | 1.479  | P | 0.200 | -0.059 |
| SN28 | 2005 | 345 | 14 | 34 | 1.830  | P | 0.200 | 0.062  |
| MNV  | 2005 | 345 | 14 | 34 | 1.926  | P | 0.200 | -0.019 |
| BFS  | 2005 | 345 | 14 | 34 | 2.198  | P | 0.200 | 0.150  |
| LRL  | 2005 | 345 | 14 | 34 | 2.787  | P | 0.200 | 0.297  |
| MPM  | 2005 | 345 | 14 | 34 | 3.741  | P | 0.200 | 0.256  |
| GRA  | 2005 | 345 | 14 | 34 | 4.319  | P | 0.200 | 0.156  |

|      |      |     |    |    |       |   |       |        |
|------|------|-----|----|----|-------|---|-------|--------|
| RRX  | 2005 | 345 | 14 | 34 | 4.842 | P | 0.200 | 0.204  |
| BBR  | 2005 | 345 | 14 | 34 | 5.035 | P | 0.200 | -0.038 |
| TPH  | 2005 | 345 | 14 | 34 | 5.059 | P | 0.200 | -0.206 |
| FUR  | 2005 | 345 | 14 | 34 | 5.847 | P | 0.200 | 0.202  |
| GSC  | 2005 | 345 | 14 | 34 | 5.968 | P | 0.200 | 0.306  |
| HEC  | 2005 | 345 | 14 | 34 | 7.341 | P | 0.200 | 0.175  |
| SHO  | 2005 | 345 | 14 | 34 | 7.694 | P | 0.200 | -0.093 |
| TPNV | 2005 | 345 | 14 | 34 | 8.353 | P | 0.200 | -0.007 |
| TUQ  | 2005 | 345 | 14 | 34 | 9.127 | P | 0.200 | 0.076  |

|      |     |    |    |         |          |           |         |    |       |
|------|-----|----|----|---------|----------|-----------|---------|----|-------|
| 2005 | 272 | 15 | 50 | 24.9675 | -5.43700 | 151.84000 | 25.0000 | 24 | 0.004 |
|------|-----|----|----|---------|----------|-----------|---------|----|-------|

|      |      |     |    |   |        |   |       |        |
|------|------|-----|----|---|--------|---|-------|--------|
| JCC  | 2005 | 272 | 16 | 3 | 18.549 | P | 0.200 | 0.359  |
| FARB | 2005 | 272 | 16 | 3 | 19.613 | P | 0.200 | -0.342 |
| TAKO | 2005 | 272 | 16 | 3 | 19.870 | P | 0.200 | 0.028  |
| P01C | 2005 | 272 | 16 | 3 | 20.006 | P | 0.200 | 0.151  |
| HOPS | 2005 | 272 | 16 | 3 | 20.472 | P | 0.200 | -0.082 |
| N02C | 2005 | 272 | 16 | 3 | 21.241 | P | 0.200 | 0.471  |
| CVS  | 2005 | 272 | 16 | 3 | 22.016 | P | 0.200 | -0.477 |
| DBO  | 2005 | 272 | 16 | 3 | 22.245 | P | 0.200 | -0.179 |
| BRK  | 2005 | 272 | 16 | 3 | 22.572 | P | 0.200 | -0.306 |
| JRSC | 2005 | 272 | 16 | 3 | 22.594 | P | 0.200 | -0.079 |
| BNLO | 2005 | 272 | 16 | 3 | 22.787 | P | 0.200 | -0.046 |
| BKS  | 2005 | 272 | 16 | 3 | 22.966 | P | 0.200 | -0.032 |
| GASB | 2005 | 272 | 16 | 3 | 22.985 | P | 0.200 | 0.645  |
| M02C | 2005 | 272 | 16 | 3 | 23.156 | P | 0.200 | 0.417  |
| BRIB | 2005 | 272 | 16 | 3 | 23.196 | P | 0.200 | 0.011  |
| HUMO | 2005 | 272 | 16 | 3 | 23.213 | P | 0.200 | 0.133  |
| MNRC | 2005 | 272 | 16 | 3 | 23.222 | P | 0.200 | 0.367  |
| WDC  | 2005 | 272 | 16 | 3 | 23.381 | P | 0.200 | 0.067  |
| YBH  | 2005 | 272 | 16 | 3 | 23.698 | P | 0.200 | 0.242  |
| O03C | 2005 | 272 | 16 | 3 | 24.453 | P | 0.200 | -0.250 |
| WENL | 2005 | 272 | 16 | 3 | 24.628 | P | 0.200 | 0.058  |
| BDM  | 2005 | 272 | 16 | 3 | 24.657 | P | 0.200 | 0.370  |
| SUTB | 2005 | 272 | 16 | 3 | 24.668 | P | 0.200 | -0.694 |
| Q03C | 2005 | 272 | 16 | 3 | 24.781 | P | 0.200 | 0.722  |
| M03C | 2005 | 272 | 16 | 3 | 24.976 | P | 0.200 | -0.343 |
| HAST | 2005 | 272 | 16 | 3 | 25.043 | P | 0.200 | 0.306  |
| MHC  | 2005 | 272 | 16 | 3 | 25.200 | P | 0.200 | 0.091  |
| SAO  | 2005 | 272 | 16 | 3 | 25.481 | P | 0.200 | 0.101  |
| SCZ  | 2005 | 272 | 16 | 3 | 25.701 | P | 0.200 | 0.343  |
| S04C | 2005 | 272 | 16 | 3 | 26.038 | P | 0.200 | -0.119 |
| ORV  | 2005 | 272 | 16 | 3 | 26.155 | P | 0.200 | -0.346 |
| M04C | 2005 | 272 | 16 | 3 | 26.323 | P | 0.200 | -0.140 |
| V03C | 2005 | 272 | 16 | 3 | 26.332 | P | 0.200 | 0.616  |
| PACP | 2005 | 272 | 16 | 3 | 26.337 | P | 0.200 | 0.178  |
| Q04C | 2005 | 272 | 16 | 3 | 26.433 | P | 0.200 | -0.021 |
| HATC | 2005 | 272 | 16 | 3 | 27.184 | P | 0.200 | -0.207 |
| V04C | 2005 | 272 | 16 | 3 | 27.310 | P | 0.200 | 0.387  |
| RAMR | 2005 | 272 | 16 | 3 | 27.311 | P | 0.200 | 0.390  |
| R04C | 2005 | 272 | 16 | 3 | 27.333 | P | 0.200 | -0.522 |
| U04C | 2005 | 272 | 16 | 3 | 28.185 | P | 0.200 | 0.502  |
| SDP  | 2005 | 272 | 16 | 3 | 28.290 | P | 0.200 | 0.315  |
| O04C | 2005 | 272 | 16 | 3 | 28.300 | P | 0.200 | -0.166 |
| PHL  | 2005 | 272 | 16 | 3 | 28.468 | P | 0.200 | 0.436  |
| PKD  | 2005 | 272 | 16 | 3 | 28.534 | P | 0.200 | 0.260  |
| LAVA | 2005 | 272 | 16 | 3 | 28.630 | P | 0.200 | -0.229 |
| T05C | 2005 | 272 | 16 | 3 | 28.841 | P | 0.200 | 0.565  |
| SN71 | 2005 | 272 | 16 | 3 | 28.977 | P | 0.200 | -0.497 |
| S05C | 2005 | 272 | 16 | 3 | 29.313 | P | 0.200 | -0.423 |
| CMB  | 2005 | 272 | 16 | 3 | 29.669 | P | 0.200 | -0.113 |
| P05C | 2005 | 272 | 16 | 3 | 29.707 | P | 0.200 | -0.050 |
| ELFS | 2005 | 272 | 16 | 3 | 29.795 | P | 0.200 | -0.043 |
| SN95 | 2005 | 272 | 16 | 3 | 30.188 | P | 0.200 | -0.439 |

|      |      |     |    |   |        |   |       |        |
|------|------|-----|----|---|--------|---|-------|--------|
| SN84 | 2005 | 272 | 16 | 3 | 30.292 | P | 0.200 | -0.651 |
| SN73 | 2005 | 272 | 16 | 3 | 30.421 | P | 0.200 | -0.363 |
| U05C | 2005 | 272 | 16 | 3 | 30.528 | P | 0.200 | 0.514  |
| SN62 | 2005 | 272 | 16 | 3 | 30.557 | P | 0.200 | -0.544 |
| SN51 | 2005 | 272 | 16 | 3 | 30.564 | P | 0.200 | -0.005 |
| SMM  | 2005 | 272 | 16 | 3 | 30.739 | P | 0.200 | 0.537  |
| SCZ2 | 2005 | 272 | 16 | 3 | 31.079 | P | 0.200 | 0.151  |
| SN74 | 2005 | 272 | 16 | 3 | 31.144 | P | 0.200 | -0.451 |
| SBC  | 2005 | 272 | 16 | 3 | 31.217 | P | 0.200 | 0.439  |
| V05C | 2005 | 272 | 16 | 3 | 31.230 | P | 0.200 | 0.639  |
| SN52 | 2005 | 272 | 16 | 3 | 31.243 | P | 0.200 | -0.378 |
| MPP  | 2005 | 272 | 16 | 3 | 31.338 | P | 0.200 | 0.484  |
| R05C | 2005 | 272 | 16 | 3 | 31.438 | P | 0.200 | -0.039 |
| SN85 | 2005 | 272 | 16 | 3 | 31.494 | P | 0.200 | -0.220 |
| T06C | 2005 | 272 | 16 | 3 | 31.587 | P | 0.200 | -0.303 |
| SN63 | 2005 | 272 | 16 | 3 | 31.635 | P | 0.200 | -0.390 |
| SNCC | 2005 | 272 | 16 | 3 | 31.784 | P | 0.200 | 0.683  |
| SN53 | 2005 | 272 | 16 | 3 | 31.876 | P | 0.200 | -0.514 |
| SN42 | 2005 | 272 | 16 | 3 | 32.216 | P | 0.200 | -0.233 |
| SN86 | 2005 | 272 | 16 | 3 | 32.462 | P | 0.200 | 0.010  |
| SN64 | 2005 | 272 | 16 | 3 | 32.475 | P | 0.200 | -0.270 |
| SN75 | 2005 | 272 | 16 | 3 | 32.505 | P | 0.200 | -0.276 |
| SN11 | 2005 | 272 | 16 | 3 | 32.568 | P | 0.200 | -0.579 |
| RCT  | 2005 | 272 | 16 | 3 | 32.710 | P | 0.200 | -0.505 |
| SN22 | 2005 | 272 | 16 | 3 | 32.867 | P | 0.200 | -0.465 |
| SN43 | 2005 | 272 | 16 | 3 | 32.878 | P | 0.200 | -0.263 |
| SN54 | 2005 | 272 | 16 | 3 | 32.909 | P | 0.200 | -0.224 |
| VES  | 2005 | 272 | 16 | 3 | 33.114 | P | 0.200 | -0.492 |
| LGU  | 2005 | 272 | 16 | 3 | 33.192 | P | 0.200 | 0.023  |
| SN65 | 2005 | 272 | 16 | 3 | 33.224 | P | 0.200 | -0.208 |
| SN76 | 2005 | 272 | 16 | 3 | 33.362 | P | 0.200 | -0.057 |
| R06C | 2005 | 272 | 16 | 3 | 33.703 | P | 0.200 | 0.151  |
| SN55 | 2005 | 272 | 16 | 3 | 33.720 | P | 0.200 | -0.251 |
| SN23 | 2005 | 272 | 16 | 3 | 33.748 | P | 0.200 | -0.305 |
| SN44 | 2005 | 272 | 16 | 3 | 33.811 | P | 0.200 | -0.030 |
| SN66 | 2005 | 272 | 16 | 3 | 33.959 | P | 0.200 | -0.040 |
| HELL | 2005 | 272 | 16 | 3 | 34.024 | P | 0.200 | -0.396 |
| TOV  | 2005 | 272 | 16 | 3 | 34.243 | P | 0.200 | 0.183  |
| SN34 | 2005 | 272 | 16 | 3 | 34.506 | P | 0.200 | -0.215 |
| SN56 | 2005 | 272 | 16 | 3 | 34.598 | P | 0.200 | -0.018 |
| SN67 | 2005 | 272 | 16 | 3 | 34.646 | P | 0.200 | -0.025 |
| SN45 | 2005 | 272 | 16 | 3 | 34.647 | P | 0.200 | -0.045 |
| SN24 | 2005 | 272 | 16 | 3 | 34.842 | P | 0.200 | -0.090 |
| R07C | 2005 | 272 | 16 | 3 | 34.985 | P | 0.200 | -0.004 |
| OSI  | 2005 | 272 | 16 | 3 | 35.038 | P | 0.200 | 0.254  |
| SN57 | 2005 | 272 | 16 | 3 | 35.295 | P | 0.200 | 0.066  |
| SN46 | 2005 | 272 | 16 | 3 | 35.492 | P | 0.200 | -0.039 |
| CIA  | 2005 | 272 | 16 | 3 | 35.555 | P | 0.200 | 0.118  |
| DJJ  | 2005 | 272 | 16 | 3 | 35.561 | P | 0.200 | 0.182  |
| SN14 | 2005 | 272 | 16 | 3 | 35.662 | P | 0.200 | -0.047 |
| MLAC | 2005 | 272 | 16 | 3 | 35.722 | P | 0.200 | 0.155  |
| RPV  | 2005 | 272 | 16 | 3 | 35.819 | P | 0.200 | 0.238  |
| ISA  | 2005 | 272 | 16 | 3 | 35.868 | P | 0.200 | -0.108 |
| DEC  | 2005 | 272 | 16 | 3 | 35.925 | P | 0.200 | -0.062 |
| SN25 | 2005 | 272 | 16 | 3 | 35.949 | P | 0.200 | -0.095 |
| SN47 | 2005 | 272 | 16 | 3 | 36.040 | P | 0.200 | -0.075 |
| FMP  | 2005 | 272 | 16 | 3 | 36.078 | P | 0.200 | 0.205  |
| SN15 | 2005 | 272 | 16 | 3 | 36.352 | P | 0.200 | 0.074  |
| SN36 | 2005 | 272 | 16 | 3 | 36.379 | P | 0.200 | 0.074  |
| SN48 | 2005 | 272 | 16 | 3 | 36.575 | P | 0.200 | -0.184 |
| PAS  | 2005 | 272 | 16 | 3 | 36.603 | P | 0.200 | 0.069  |
| SN37 | 2005 | 272 | 16 | 3 | 36.694 | P | 0.200 | -0.001 |
| SN26 | 2005 | 272 | 16 | 3 | 36.766 | P | 0.200 | 0.044  |

|      |      |     |    |   |        |   |       |        |
|------|------|-----|----|---|--------|---|-------|--------|
| VCS  | 2005 | 272 | 16 | 3 | 37.275 | P | 0.200 | 0.371  |
| MWC  | 2005 | 272 | 16 | 3 | 37.358 | P | 0.200 | 0.068  |
| SN38 | 2005 | 272 | 16 | 3 | 37.374 | P | 0.200 | -0.076 |
| TIN  | 2005 | 272 | 16 | 3 | 37.519 | P | 0.200 | 0.032  |
| CHF  | 2005 | 272 | 16 | 3 | 37.520 | P | 0.200 | 0.145  |
| CWC  | 2005 | 272 | 16 | 3 | 37.704 | P | 0.200 | -0.223 |
| SN16 | 2005 | 272 | 16 | 3 | 37.780 | P | 0.200 | 0.201  |
| EDW2 | 2005 | 272 | 16 | 3 | 37.832 | P | 0.200 | 0.326  |
| SN28 | 2005 | 272 | 16 | 3 | 38.026 | P | 0.200 | 0.001  |
| MNV  | 2005 | 272 | 16 | 3 | 38.074 | P | 0.200 | -0.089 |
| S08C | 2005 | 272 | 16 | 3 | 38.289 | P | 0.200 | 0.208  |
| BFS  | 2005 | 272 | 16 | 3 | 38.625 | P | 0.200 | -0.017 |
| LRL  | 2005 | 272 | 16 | 3 | 39.102 | P | 0.200 | 0.131  |
| ADO  | 2005 | 272 | 16 | 3 | 39.676 | P | 0.200 | 0.041  |
| MPM  | 2005 | 272 | 16 | 3 | 40.107 | P | 0.200 | 0.191  |
| GRA  | 2005 | 272 | 16 | 3 | 40.553 | P | 0.200 | 0.044  |
| SLA  | 2005 | 272 | 16 | 3 | 40.665 | P | 0.200 | 0.058  |
| SVD  | 2005 | 272 | 16 | 3 | 41.001 | P | 0.200 | 0.259  |
| RRX  | 2005 | 272 | 16 | 3 | 41.269 | P | 0.200 | 0.092  |
| BBR  | 2005 | 272 | 16 | 3 | 41.619 | P | 0.200 | -0.052 |
| FUR  | 2005 | 272 | 16 | 3 | 42.185 | P | 0.200 | 0.140  |
| GSC  | 2005 | 272 | 16 | 3 | 42.309 | P | 0.200 | 0.146  |
| HEC  | 2005 | 272 | 16 | 3 | 43.681 | P | 0.200 | -0.034 |
| SHO  | 2005 | 272 | 16 | 3 | 44.040 | P | 0.200 | -0.199 |
| TUQ  | 2005 | 272 | 16 | 3 | 45.568 | P | 0.200 | 0.016  |

|      |     |   |    |        |          |           |         |     |        |
|------|-----|---|----|--------|----------|-----------|---------|-----|--------|
| 2006 | 148 | 3 | 12 | 9.5547 | -5.72400 | 151.13300 | 34.0000 | 133 | -0.003 |
|------|-----|---|----|--------|----------|-----------|---------|-----|--------|

|      |      |     |   |    |        |   |       |        |
|------|------|-----|---|----|--------|---|-------|--------|
| K01A | 2006 | 148 | 3 | 25 | 4.618  | P | 0.200 | 0.151  |
| JCC  | 2006 | 148 | 3 | 25 | 5.013  | P | 0.200 | 0.165  |
| M01C | 2006 | 148 | 3 | 25 | 5.338  | P | 0.200 | 0.311  |
| O01C | 2006 | 148 | 3 | 25 | 5.532  | P | 0.200 | 0.376  |
| P01C | 2006 | 148 | 3 | 25 | 6.590  | P | 0.200 | 0.057  |
| FARB | 2006 | 148 | 3 | 25 | 6.627  | P | 0.200 | -0.038 |
| MCCM | 2006 | 148 | 3 | 25 | 7.172  | P | 0.200 | -0.223 |
| HOPS | 2006 | 148 | 3 | 25 | 7.212  | P | 0.200 | -0.024 |
| L02A | 2006 | 148 | 3 | 25 | 7.213  | P | 0.200 | -0.011 |
| N02C | 2006 | 148 | 3 | 25 | 7.645  | P | 0.200 | 0.232  |
| J02A | 2006 | 148 | 3 | 25 | 7.679  | P | 0.200 | -0.222 |
| DBO  | 2006 | 148 | 3 | 25 | 8.694  | P | 0.200 | -0.314 |
| CVS  | 2006 | 148 | 3 | 25 | 8.761  | P | 0.200 | -0.413 |
| I03A | 2006 | 148 | 3 | 25 | 8.975  | P | 0.200 | -0.273 |
| JRSC | 2006 | 148 | 3 | 25 | 9.254  | P | 0.200 | -0.114 |
| BRK  | 2006 | 148 | 3 | 25 | 9.273  | P | 0.200 | -0.291 |
| O02C | 2006 | 148 | 3 | 25 | 9.441  | P | 0.200 | 0.456  |
| BNLO | 2006 | 148 | 3 | 25 | 9.450  | P | 0.200 | -0.081 |
| HUMO | 2006 | 148 | 3 | 25 | 9.621  | P | 0.200 | -0.053 |
| GASB | 2006 | 148 | 3 | 25 | 9.656  | P | 0.200 | 0.660  |
| BKS  | 2006 | 148 | 3 | 25 | 9.666  | P | 0.200 | -0.016 |
| M02C | 2006 | 148 | 3 | 25 | 9.691  | P | 0.200 | 0.332  |
| MNRC | 2006 | 148 | 3 | 25 | 9.756  | P | 0.200 | 0.231  |
| J03A | 2006 | 148 | 3 | 25 | 9.925  | P | 0.200 | 0.062  |
| WDC  | 2006 | 148 | 3 | 25 | 9.930  | P | 0.200 | -0.017 |
| BRIB | 2006 | 148 | 3 | 25 | 9.944  | P | 0.200 | 0.076  |
| YBH  | 2006 | 148 | 3 | 25 | 10.174 | P | 0.200 | 0.106  |
| BDM  | 2006 | 148 | 3 | 25 | 11.002 | P | 0.200 | 0.032  |
| O03C | 2006 | 148 | 3 | 25 | 11.108 | P | 0.200 | -0.240 |
| WENL | 2006 | 148 | 3 | 25 | 11.377 | P | 0.200 | 0.120  |
| SUTB | 2006 | 148 | 3 | 25 | 11.386 | P | 0.200 | -0.636 |
| Q03C | 2006 | 148 | 3 | 25 | 11.514 | P | 0.200 | 0.784  |
| M03C | 2006 | 148 | 3 | 25 | 11.556 | P | 0.200 | -0.384 |
| HAST | 2006 | 148 | 3 | 25 | 11.711 | P | 0.200 | 0.266  |
| MHC  | 2006 | 148 | 3 | 25 | 11.903 | P | 0.200 | 0.102  |
| SAO  | 2006 | 148 | 3 | 25 | 12.183 | P | 0.200 | 0.102  |



|       |      |     |   |    |        |   |       |        |
|-------|------|-----|---|----|--------|---|-------|--------|
| ORV   | 2006 | 148 | 3 | 25 | 12.713 | P | 0.200 | -0.441 |
| L04A  | 2006 | 148 | 3 | 25 | 12.809 | P | 0.200 | -0.335 |
| S04C  | 2006 | 148 | 3 | 25 | 12.933 | P | 0.200 | 0.087  |
| M04C  | 2006 | 148 | 3 | 25 | 12.938 | P | 0.200 | -0.132 |
| Q04C  | 2006 | 148 | 3 | 25 | 13.054 | P | 0.200 | -0.064 |
| PACP  | 2006 | 148 | 3 | 25 | 13.091 | P | 0.200 | 0.236  |
| V03C  | 2006 | 148 | 3 | 25 | 13.153 | P | 0.200 | 0.724  |
| K04A  | 2006 | 148 | 3 | 25 | 13.572 | P | 0.200 | -0.330 |
| HATC  | 2006 | 148 | 3 | 25 | 13.766 | P | 0.200 | -0.248 |
| R04C  | 2006 | 148 | 3 | 25 | 14.061 | P | 0.200 | -0.460 |
| V04C  | 2006 | 148 | 3 | 25 | 14.182 | P | 0.200 | 0.548  |
| O04C  | 2006 | 148 | 3 | 25 | 14.888 | P | 0.200 | -0.200 |
| U04C  | 2006 | 148 | 3 | 25 | 14.944 | P | 0.200 | 0.563  |
| M05C  | 2006 | 148 | 3 | 25 | 15.015 | P | 0.200 | -0.386 |
| O05C  | 2006 | 148 | 3 | 25 | 15.214 | P | 0.200 | -0.108 |
| LAVA  | 2006 | 148 | 3 | 25 | 15.296 | P | 0.200 | -0.212 |
| PKD   | 2006 | 148 | 3 | 25 | 15.297 | P | 0.200 | 0.325  |
| SN71  | 2006 | 148 | 3 | 25 | 15.710 | P | 0.200 | -0.429 |
| S05C  | 2006 | 148 | 3 | 25 | 16.050 | P | 0.200 | -0.351 |
| CMB   | 2006 | 148 | 3 | 25 | 16.344 | P | 0.200 | -0.092 |
| P05C  | 2006 | 148 | 3 | 25 | 16.411 | P | 0.200 | 0.021  |
| ELFS  | 2006 | 148 | 3 | 25 | 16.524 | P | 0.200 | 0.079  |
| SN84  | 2006 | 148 | 3 | 25 | 17.013 | P | 0.200 | -0.581 |
| BEK   | 2006 | 148 | 3 | 25 | 17.087 | P | 0.200 | -0.451 |
| SN73  | 2006 | 148 | 3 | 25 | 17.097 | P | 0.200 | -0.345 |
| U05C  | 2006 | 148 | 3 | 25 | 17.280 | P | 0.200 | 0.585  |
| SN51  | 2006 | 148 | 3 | 25 | 17.350 | P | 0.200 | 0.115  |
| M06C  | 2006 | 148 | 3 | 25 | 17.450 | P | 0.200 | -0.159 |
| SMM   | 2006 | 148 | 3 | 25 | 17.456 | P | 0.200 | 0.558  |
| SN52  | 2006 | 148 | 3 | 25 | 17.825 | P | 0.200 | -0.458 |
| SCZ2  | 2006 | 148 | 3 | 25 | 17.860 | P | 0.200 | 0.221  |
| SN85  | 2006 | 148 | 3 | 25 | 18.111 | P | 0.200 | -0.251 |
| S06C  | 2006 | 148 | 3 | 25 | 18.123 | P | 0.200 | -0.465 |
| V05C  | 2006 | 148 | 3 | 25 | 18.137 | P | 0.200 | 0.862  |
| R05C  | 2006 | 148 | 3 | 25 | 18.148 | P | 0.200 | 0.032  |
| SBC   | 2006 | 148 | 3 | 25 | 18.193 | P | 0.200 | 0.708  |
| T06C  | 2006 | 148 | 3 | 25 | 18.274 | P | 0.200 | -0.283 |
| SNCC  | 2006 | 148 | 3 | 25 | 18.425 | P | 0.200 | 0.603  |
| SN21  | 2006 | 148 | 3 | 25 | 18.615 | P | 0.200 | -0.572 |
| P06A  | 2006 | 148 | 3 | 25 | 19.030 | P | 0.200 | 0.052  |
| SN64  | 2006 | 148 | 3 | 25 | 19.196 | P | 0.200 | -0.203 |
| O06A  | 2006 | 148 | 3 | 25 | 19.224 | P | 0.200 | -0.226 |
| SN11  | 2006 | 148 | 3 | 25 | 19.355 | P | 0.200 | -0.463 |
| RCT   | 2006 | 148 | 3 | 25 | 19.503 | P | 0.200 | -0.391 |
| WCN   | 2006 | 148 | 3 | 25 | 19.579 | P | 0.200 | 0.212  |
| SN54  | 2006 | 148 | 3 | 25 | 19.631 | P | 0.200 | -0.157 |
| VES   | 2006 | 148 | 3 | 25 | 19.713 | P | 0.200 | -0.581 |
| LGU   | 2006 | 148 | 3 | 25 | 19.916 | P | 0.200 | 0.040  |
| SN76  | 2006 | 148 | 3 | 25 | 19.972 | P | 0.200 | -0.092 |
| SN44  | 2006 | 148 | 3 | 25 | 20.385 | P | 0.200 | -0.118 |
| R06C  | 2006 | 148 | 3 | 25 | 20.410 | P | 0.200 | 0.216  |
| SN23  | 2006 | 148 | 3 | 25 | 20.427 | P | 0.200 | -0.293 |
| SN55  | 2006 | 148 | 3 | 25 | 20.487 | P | 0.200 | -0.138 |
| SN66  | 2006 | 148 | 3 | 25 | 20.622 | P | 0.200 | -0.028 |
| HELLL | 2006 | 148 | 3 | 25 | 20.709 | P | 0.200 | -0.387 |
| ARV   | 2006 | 148 | 3 | 25 | 21.292 | P | 0.200 | 0.207  |
| SN67  | 2006 | 148 | 3 | 25 | 21.355 | P | 0.200 | 0.032  |
| R07C  | 2006 | 148 | 3 | 25 | 21.746 | P | 0.200 | 0.100  |
| OSI   | 2006 | 148 | 3 | 25 | 21.851 | P | 0.200 | 0.359  |
| SN57  | 2006 | 148 | 3 | 25 | 22.004 | P | 0.200 | 0.118  |
| M07A  | 2006 | 148 | 3 | 25 | 22.063 | P | 0.200 | -0.136 |
| SN46  | 2006 | 148 | 3 | 25 | 22.157 | P | 0.200 | -0.036 |
| DJJ   | 2006 | 148 | 3 | 25 | 22.228 | P | 0.200 | 0.130  |

|      |      |     |   |    |        |   |       |        |
|------|------|-----|---|----|--------|---|-------|--------|
| CIA  | 2006 | 148 | 3 | 25 | 22.280 | P | 0.200 | 0.118  |
| N07B | 2006 | 148 | 3 | 25 | 22.535 | P | 0.200 | -0.082 |
| O07A | 2006 | 148 | 3 | 25 | 22.544 | P | 0.200 | -0.271 |
| ISA  | 2006 | 148 | 3 | 25 | 22.563 | P | 0.200 | -0.107 |
| Q07A | 2006 | 148 | 3 | 25 | 22.608 | P | 0.200 | 0.023  |
| SN25 | 2006 | 148 | 3 | 25 | 22.619 | P | 0.200 | -0.095 |
| P07A | 2006 | 148 | 3 | 25 | 22.632 | P | 0.200 | 0.058  |
| SN47 | 2006 | 148 | 3 | 25 | 22.650 | P | 0.200 | -0.127 |
| DEC  | 2006 | 148 | 3 | 25 | 22.739 | P | 0.200 | 0.039  |
| SN36 | 2006 | 148 | 3 | 25 | 22.993 | P | 0.200 | 0.023  |
| FMP  | 2006 | 148 | 3 | 25 | 23.049 | P | 0.200 | 0.454  |
| SN15 | 2006 | 148 | 3 | 25 | 23.172 | P | 0.200 | 0.224  |
| SN48 | 2006 | 148 | 3 | 25 | 23.280 | P | 0.200 | -0.133 |
| SN37 | 2006 | 148 | 3 | 25 | 23.355 | P | 0.200 | 0.001  |
| SN26 | 2006 | 148 | 3 | 25 | 23.480 | P | 0.200 | 0.095  |
| SN38 | 2006 | 148 | 3 | 25 | 23.929 | P | 0.200 | -0.173 |
| MWC  | 2006 | 148 | 3 | 25 | 24.019 | P | 0.200 | 0.020  |
| CHF  | 2006 | 148 | 3 | 25 | 24.179 | P | 0.200 | 0.102  |
| TIN  | 2006 | 148 | 3 | 25 | 24.289 | P | 0.200 | 0.139  |
| SN16 | 2006 | 148 | 3 | 25 | 24.396 | P | 0.200 | 0.156  |
| CWC  | 2006 | 148 | 3 | 25 | 24.483 | P | 0.200 | -0.114 |
| SN28 | 2006 | 148 | 3 | 25 | 24.681 | P | 0.200 | 0.010  |
| MNV  | 2006 | 148 | 3 | 25 | 24.770 | P | 0.200 | -0.030 |
| R08A | 2006 | 148 | 3 | 25 | 24.860 | P | 0.200 | -0.041 |
| S08C | 2006 | 148 | 3 | 25 | 24.951 | P | 0.200 | 0.214  |
| BFS  | 2006 | 148 | 3 | 25 | 25.381 | P | 0.200 | 0.048  |
| O08A | 2006 | 148 | 3 | 25 | 25.503 | P | 0.200 | 0.077  |
| N08A | 2006 | 148 | 3 | 25 | 25.578 | P | 0.200 | 0.062  |
| Q08A | 2006 | 148 | 3 | 25 | 25.593 | P | 0.200 | -0.170 |
| P08A | 2006 | 148 | 3 | 25 | 25.629 | P | 0.200 | 0.169  |
| LRL  | 2006 | 148 | 3 | 25 | 25.991 | P | 0.200 | 0.347  |
| ADO  | 2006 | 148 | 3 | 25 | 26.475 | P | 0.200 | 0.157  |
| MPM  | 2006 | 148 | 3 | 25 | 26.734 | P | 0.200 | 0.161  |
| GRA  | 2006 | 148 | 3 | 25 | 27.213 | P | 0.200 | 0.063  |
| S09A | 2006 | 148 | 3 | 25 | 27.934 | P | 0.200 | -0.099 |
| TPH  | 2006 | 148 | 3 | 25 | 27.939 | P | 0.200 | -0.206 |
| RRX  | 2006 | 148 | 3 | 25 | 28.107 | P | 0.200 | 0.261  |
| BBR  | 2006 | 148 | 3 | 25 | 28.213 | P | 0.200 | -0.136 |
| Q09A | 2006 | 148 | 3 | 25 | 28.443 | P | 0.200 | 0.044  |
| BMN  | 2006 | 148 | 3 | 25 | 28.531 | P | 0.200 | -0.140 |
| P09A | 2006 | 148 | 3 | 25 | 28.533 | P | 0.200 | -0.168 |
| O09A | 2006 | 148 | 3 | 25 | 28.820 | P | 0.200 | 0.155  |
| FUR  | 2006 | 148 | 3 | 25 | 28.896 | P | 0.200 | 0.202  |
| GSC  | 2006 | 148 | 3 | 25 | 29.038 | P | 0.200 | 0.210  |
| HEC  | 2006 | 148 | 3 | 25 | 30.558 | P | 0.200 | 0.173  |
| SHO  | 2006 | 148 | 3 | 25 | 30.799 | P | 0.200 | -0.091 |
| TPNV | 2006 | 148 | 3 | 25 | 31.299 | P | 0.200 | -0.058 |
| TUQ  | 2006 | 148 | 3 | 25 | 32.229 | P | 0.200 | 0.031  |

|      |      |     |    |        |           |           |         |        |       |
|------|------|-----|----|--------|-----------|-----------|---------|--------|-------|
| 2006 | 240  | 14  | 24 | 7.9219 | -10.75600 | 165.05701 | 16.7000 | 211    | 0.008 |
| P01C | 2006 | 240 | 14 | 36     | 32.378    | P         | 0.200   | 0.110  |       |
| HOPS | 2006 | 240 | 14 | 36     | 32.536    | P         | 0.200   | 0.134  |       |
| BNLO | 2006 | 240 | 14 | 36     | 32.678    | P         | 0.200   | -0.082 |       |
| JRSC | 2006 | 240 | 14 | 36     | 32.883    | P         | 0.200   | 0.019  |       |
| CVS  | 2006 | 240 | 14 | 36     | 33.340    | P         | 0.200   | -0.417 |       |
| BRK  | 2006 | 240 | 14 | 36     | 33.492    | P         | 0.200   | -0.097 |       |
| BKS  | 2006 | 240 | 14 | 36     | 33.744    | P         | 0.200   | -0.039 |       |
| HAST | 2006 | 240 | 14 | 36     | 34.170    | P         | 0.200   | 0.240  |       |
| SAO  | 2006 | 240 | 14 | 36     | 34.991    | P         | 0.200   | -0.076 |       |
| MNRC | 2006 | 240 | 14 | 36     | 35.060    | P         | 0.200   | 0.380  |       |
| N02C | 2006 | 240 | 14 | 36     | 35.095    | P         | 0.200   | 0.332  |       |
| MHC  | 2006 | 240 | 14 | 36     | 35.481    | P         | 0.200   | 0.096  |       |
| GASB | 2006 | 240 | 14 | 36     | 35.971    | P         | 0.200   | 0.960  |       |

|      |      |     |    |    |        |   |       |        |
|------|------|-----|----|----|--------|---|-------|--------|
| O02C | 2006 | 240 | 14 | 36 | 36.307 | P | 0.200 | 0.674  |
| PACP | 2006 | 240 | 14 | 36 | 36.360 | P | 0.200 | 0.229  |
| PHL  | 2006 | 240 | 14 | 36 | 36.411 | P | 0.200 | -0.003 |
| S04C | 2006 | 240 | 14 | 36 | 36.809 | P | 0.200 | 0.159  |
| SUTB | 2006 | 240 | 14 | 36 | 37.157 | P | 0.200 | -0.604 |
| PKD  | 2006 | 240 | 14 | 36 | 37.369 | P | 0.200 | 0.184  |
| WDC  | 2006 | 240 | 14 | 36 | 37.406 | P | 0.200 | 0.264  |
| U04C | 2006 | 240 | 14 | 36 | 37.633 | P | 0.200 | 0.626  |
| SNC3 | 2006 | 240 | 14 | 36 | 38.846 | P | 0.200 | -0.092 |
| M02C | 2006 | 240 | 14 | 36 | 38.077 | P | 0.200 | 0.650  |
| SNG5 | 2006 | 240 | 14 | 36 | 39.122 | P | 0.200 | -0.299 |
| SNE4 | 2006 | 240 | 14 | 36 | 39.149 | P | 0.200 | -0.116 |
| SNC4 | 2006 | 240 | 14 | 36 | 39.848 | P | 0.200 | -0.357 |
| ORV  | 2006 | 240 | 14 | 36 | 38.950 | P | 0.200 | -0.305 |
| MPP  | 2006 | 240 | 14 | 36 | 38.962 | P | 0.200 | 0.194  |
| YBH  | 2006 | 240 | 14 | 36 | 38.977 | P | 0.200 | 0.429  |
| SNE5 | 2006 | 240 | 14 | 36 | 40.269 | P | 0.200 | -0.110 |
| SND4 | 2006 | 240 | 14 | 36 | 39.484 | P | 0.200 | -0.235 |
| SNA3 | 2006 | 240 | 14 | 36 | 40.509 | P | 0.200 | 0.181  |
| SND5 | 2006 | 240 | 14 | 36 | 40.520 | P | 0.200 | -0.306 |
| SNC5 | 2006 | 240 | 14 | 36 | 40.814 | P | 0.200 | -0.479 |
| S05C | 2006 | 240 | 14 | 36 | 39.922 | P | 0.200 | -0.332 |
| M03C | 2006 | 240 | 14 | 36 | 39.945 | P | 0.200 | -0.039 |
| SNA4 | 2006 | 240 | 14 | 36 | 41.099 | P | 0.200 | -0.141 |
| SNF6 | 2006 | 240 | 14 | 36 | 41.111 | P | 0.200 | -0.098 |
| SNG7 | 2006 | 240 | 14 | 36 | 41.353 | P | 0.200 | -0.192 |
| SNB5 | 2006 | 240 | 14 | 36 | 41.481 | P | 0.200 | -0.290 |
| SNE6 | 2006 | 240 | 14 | 36 | 41.636 | P | 0.200 | -0.157 |
| LAVA | 2006 | 240 | 14 | 36 | 40.684 | P | 0.200 | -0.150 |
| SN93 | 2006 | 240 | 14 | 36 | 40.690 | P | 0.200 | 0.330  |
| CMB  | 2006 | 240 | 14 | 36 | 40.776 | P | 0.200 | -0.266 |
| SNA5 | 2006 | 240 | 14 | 36 | 42.198 | P | 0.200 | -0.239 |
| HATC | 2006 | 240 | 14 | 36 | 41.655 | P | 0.200 | 0.039  |
| SNE7 | 2006 | 240 | 14 | 36 | 42.687 | P | 0.200 | -0.048 |
| T06C | 2006 | 240 | 14 | 36 | 41.771 | P | 0.200 | -0.368 |
| SNB6 | 2006 | 240 | 14 | 36 | 42.846 | P | 0.200 | -0.183 |
| M04C | 2006 | 240 | 14 | 36 | 41.898 | P | 0.200 | 0.199  |
| O05C | 2006 | 240 | 14 | 36 | 42.094 | P | 0.200 | 0.085  |
| O04C | 2006 | 240 | 14 | 36 | 42.205 | P | 0.200 | 0.076  |
| VES  | 2006 | 240 | 14 | 36 | 42.239 | P | 0.200 | -0.425 |
| L04A | 2006 | 240 | 14 | 36 | 42.268 | P | 0.200 | 0.032  |
| SNF8 | 2006 | 240 | 14 | 36 | 43.377 | P | 0.200 | -0.129 |
| SNC7 | 2006 | 240 | 14 | 36 | 43.462 | P | 0.200 | 0.242  |
| P05C | 2006 | 240 | 14 | 36 | 42.535 | P | 0.200 | 0.182  |
| SN43 | 2006 | 240 | 14 | 36 | 43.583 | P | 0.200 | -0.245 |
| S06C | 2006 | 240 | 14 | 36 | 42.664 | P | 0.200 | -0.458 |
| SNB7 | 2006 | 240 | 14 | 36 | 43.713 | P | 0.200 | -0.054 |
| ARV  | 2006 | 240 | 14 | 36 | 42.741 | P | 0.200 | 0.010  |
| OSI  | 2006 | 240 | 14 | 36 | 42.771 | P | 0.200 | 0.105  |
| SN96 | 2006 | 240 | 14 | 36 | 43.145 | P | 0.200 | -0.197 |
| SND8 | 2006 | 240 | 14 | 36 | 44.330 | P | 0.200 | 0.121  |
| R05C | 2006 | 240 | 14 | 36 | 43.471 | P | 0.200 | -0.053 |
| M05C | 2006 | 240 | 14 | 36 | 43.511 | P | 0.200 | -0.108 |
| SNE9 | 2006 | 240 | 14 | 36 | 44.593 | P | 0.200 | -0.552 |
| K04A | 2006 | 240 | 14 | 36 | 43.603 | P | 0.200 | 0.065  |
| SN97 | 2006 | 240 | 14 | 36 | 44.781 | P | 0.200 | 0.124  |
| SNA7 | 2006 | 240 | 14 | 36 | 44.804 | P | 0.200 | 0.121  |
| HELL | 2006 | 240 | 14 | 36 | 43.905 | P | 0.200 | -0.522 |
| SNC8 | 2006 | 240 | 14 | 36 | 44.978 | P | 0.200 | 0.053  |
| BEK  | 2006 | 240 | 14 | 36 | 44.027 | P | 0.200 | -0.149 |
| SN55 | 2006 | 240 | 14 | 36 | 45.049 | P | 0.200 | -0.195 |
| SNF9 | 2006 | 240 | 14 | 36 | 44.075 | P | 0.200 | -0.304 |
| ELFS | 2006 | 240 | 14 | 36 | 44.221 | P | 0.200 | 0.318  |

|      |      |     |    |    |        |   |       |        |
|------|------|-----|----|----|--------|---|-------|--------|
| SN24 | 2006 | 240 | 14 | 36 | 45.522 | P | 0.200 | -0.027 |
| MWC  | 2006 | 240 | 14 | 36 | 44.543 | P | 0.200 | -0.302 |
| VCS  | 2006 | 240 | 14 | 36 | 44.572 | P | 0.200 | -0.133 |
| CHF  | 2006 | 240 | 14 | 36 | 44.674 | P | 0.200 | -0.348 |
| ISA  | 2006 | 240 | 14 | 36 | 44.847 | P | 0.200 | -0.130 |
| SNA8 | 2006 | 240 | 14 | 36 | 45.964 | P | 0.200 | 0.199  |
| WCN  | 2006 | 240 | 14 | 36 | 45.658 | P | 0.200 | 0.202  |
| R06C | 2006 | 240 | 14 | 36 | 45.714 | P | 0.200 | 0.261  |
| P06A | 2006 | 240 | 14 | 36 | 45.762 | P | 0.200 | 0.242  |
| EDW2 | 2006 | 240 | 14 | 36 | 45.763 | P | 0.200 | 0.007  |
| BFS  | 2006 | 240 | 14 | 36 | 45.840 | P | 0.200 | -0.428 |
| M06C | 2006 | 240 | 14 | 36 | 45.885 | P | 0.200 | 0.142  |
| L05A | 2006 | 240 | 14 | 36 | 46.157 | P | 0.200 | 0.236  |
| O06A | 2006 | 240 | 14 | 36 | 46.506 | P | 0.200 | 0.003  |
| J05A | 2006 | 240 | 14 | 36 | 46.548 | P | 0.200 | 0.188  |
| R07C | 2006 | 240 | 14 | 36 | 46.624 | P | 0.200 | 0.175  |
| MLAC | 2006 | 240 | 14 | 36 | 46.844 | P | 0.200 | 0.267  |
| K05A | 2006 | 240 | 14 | 36 | 46.976 | P | 0.200 | 0.276  |
| N06A | 2006 | 240 | 14 | 36 | 47.315 | P | 0.200 | -0.028 |
| CWC  | 2006 | 240 | 14 | 36 | 47.556 | P | 0.200 | -0.257 |
| LRL  | 2006 | 240 | 14 | 36 | 48.001 | P | 0.200 | 0.140  |
| TIN  | 2006 | 240 | 14 | 36 | 48.100 | P | 0.200 | 0.137  |
| SVD  | 2006 | 240 | 14 | 36 | 48.214 | P | 0.200 | -0.113 |
| Q07A | 2006 | 240 | 14 | 36 | 48.492 | P | 0.200 | 0.135  |
| P07A | 2006 | 240 | 14 | 36 | 49.167 | P | 0.200 | 0.181  |
| S08C | 2006 | 240 | 14 | 36 | 49.347 | P | 0.200 | 0.320  |
| MPM  | 2006 | 240 | 14 | 36 | 49.482 | P | 0.200 | 0.052  |
| O07A | 2006 | 240 | 14 | 36 | 49.812 | P | 0.200 | -0.138 |
| SLA  | 2006 | 240 | 14 | 36 | 49.940 | P | 0.200 | -0.069 |
| R08A | 2006 | 240 | 14 | 36 | 50.128 | P | 0.200 | -0.040 |
| N07B | 2006 | 240 | 14 | 36 | 50.525 | P | 0.200 | 0.138  |
| M07A | 2006 | 240 | 14 | 36 | 50.861 | P | 0.200 | 0.195  |
| GSC  | 2006 | 240 | 14 | 36 | 50.934 | P | 0.200 | -0.093 |
| GRA  | 2006 | 240 | 14 | 36 | 51.117 | P | 0.200 | 0.062  |
| L07A | 2006 | 240 | 14 | 36 | 51.352 | P | 0.200 | 0.354  |
| Q08A | 2006 | 240 | 14 | 36 | 51.380 | P | 0.200 | -0.169 |
| HEC  | 2006 | 240 | 14 | 36 | 51.878 | P | 0.200 | -0.245 |
| FUR  | 2006 | 240 | 14 | 36 | 52.249 | P | 0.200 | 0.185  |
| S09A | 2006 | 240 | 14 | 36 | 52.522 | P | 0.200 | -0.168 |
| TPH  | 2006 | 240 | 14 | 36 | 52.998 | P | 0.200 | -0.166 |
| N08A | 2006 | 240 | 14 | 36 | 53.473 | P | 0.200 | 0.115  |
| SHO  | 2006 | 240 | 14 | 36 | 53.474 | P | 0.200 | -0.288 |
| R09A | 2006 | 240 | 14 | 36 | 53.717 | P | 0.200 | -0.261 |
| Q09A | 2006 | 240 | 14 | 36 | 54.357 | P | 0.200 | 0.134  |
| TUQ  | 2006 | 240 | 14 | 36 | 54.413 | P | 0.200 | -0.222 |
| P09A | 2006 | 240 | 14 | 36 | 55.154 | P | 0.200 | -0.121 |
| O09A | 2006 | 240 | 14 | 36 | 56.191 | P | 0.200 | 0.290  |
| BMN  | 2006 | 240 | 14 | 36 | 56.328 | P | 0.200 | 0.147  |
| R10A | 2006 | 240 | 14 | 36 | 57.055 | P | 0.200 | 0.266  |
| Q11A | 2006 | 240 | 14 | 37 | 0.007  | P | 0.200 | 0.249  |

|      |      |     |    |         |          |            |         |        |        |
|------|------|-----|----|---------|----------|------------|---------|--------|--------|
| 2006 | 288  | 17  | 14 | 13.8249 | 20.12900 | -155.98300 | 18.9000 | 233    | -0.022 |
| FARB | 2006 | 288 | 17 | 20      | 51.591   | P          | 0.200   | -0.591 |        |
| MCCM | 2006 | 288 | 17 | 20      | 53.892   | P          | 0.200   | -0.582 |        |
| BNLO | 2006 | 288 | 17 | 20      | 54.957   | P          | 0.200   | -0.904 |        |
| JRSC | 2006 | 288 | 17 | 20      | 55.673   | P          | 0.200   | -0.472 |        |
| HOPS | 2006 | 288 | 17 | 20      | 56.075   | P          | 0.200   | -0.068 |        |
| BRK  | 2006 | 288 | 17 | 20      | 57.066   | P          | 0.200   | -0.433 |        |
| CVS  | 2006 | 288 | 17 | 20      | 57.111   | P          | 0.200   | -0.733 |        |
| HAST | 2006 | 288 | 17 | 20      | 57.338   | P          | 0.200   | -0.359 |        |
| BKS  | 2006 | 288 | 17 | 20      | 57.436   | P          | 0.200   | -0.308 |        |
| BRIB | 2006 | 288 | 17 | 20      | 58.255   | P          | 0.200   | -0.073 |        |
| SAO  | 2006 | 288 | 17 | 20      | 58.989   | P          | 0.200   | -0.536 |        |

|      |      |     |    |    |        |   |       |        |
|------|------|-----|----|----|--------|---|-------|--------|
| MHC  | 2006 | 288 | 17 | 20 | 59.918 | P | 0.200 | -0.114 |
| RAMR | 2006 | 288 | 17 | 20 | 59.947 | P | 0.200 | -0.368 |
| MNRC | 2006 | 288 | 17 | 21 | 0.006  | P | 0.200 | 0.320  |
| WENL | 2006 | 288 | 17 | 21 | 0.038  | P | 0.200 | 0.105  |
| PACP | 2006 | 288 | 17 | 21 | 1.335  | P | 0.200 | 0.010  |
| PHL  | 2006 | 288 | 17 | 21 | 1.602  | P | 0.200 | -0.323 |
| GASB | 2006 | 288 | 17 | 21 | 1.659  | P | 0.200 | 0.822  |
| N02C | 2006 | 288 | 17 | 21 | 2.231  | P | 0.200 | 0.626  |
| S04C | 2006 | 288 | 17 | 21 | 2.483  | P | 0.200 | 0.148  |
| PKD  | 2006 | 288 | 17 | 21 | 3.036  | P | 0.200 | -0.177 |
| O02C | 2006 | 288 | 17 | 21 | 3.080  | P | 0.200 | 0.836  |
| SNCC | 2006 | 288 | 17 | 21 | 3.717  | P | 0.200 | -0.480 |
| SCZ2 | 2006 | 288 | 17 | 21 | 4.025  | P | 0.200 | -0.948 |
| SUTB | 2006 | 288 | 17 | 21 | 4.441  | P | 0.200 | -0.519 |
| SBC  | 2006 | 288 | 17 | 21 | 4.966  | P | 0.200 | -0.299 |
| SMM  | 2006 | 288 | 17 | 21 | 5.335  | P | 0.200 | -0.130 |
| Q04C | 2006 | 288 | 17 | 21 | 5.728  | P | 0.200 | -0.374 |
| WDC  | 2006 | 288 | 17 | 21 | 5.742  | P | 0.200 | 0.584  |
| O03C | 2006 | 288 | 17 | 21 | 6.454  | P | 0.200 | 0.482  |
| SNB3 | 2006 | 288 | 17 | 21 | 7.551  | P | 0.200 | -0.208 |
| SNE4 | 2006 | 288 | 17 | 21 | 7.563  | P | 0.200 | -0.100 |
| R04C | 2006 | 288 | 17 | 21 | 6.752  | P | 0.200 | -0.386 |
| SNG5 | 2006 | 288 | 17 | 21 | 8.134  | P | 0.200 | -0.064 |
| M02C | 2006 | 288 | 17 | 21 | 7.521  | P | 0.200 | 1.048  |
| U05C | 2006 | 288 | 17 | 21 | 7.538  | P | 0.200 | 0.488  |
| ORV  | 2006 | 288 | 17 | 21 | 7.687  | P | 0.200 | 0.005  |
| S05C | 2006 | 288 | 17 | 21 | 7.698  | P | 0.200 | -0.674 |
| SNA3 | 2006 | 288 | 17 | 21 | 8.966  | P | 0.200 | -0.004 |
| SNC4 | 2006 | 288 | 17 | 21 | 9.009  | P | 0.200 | 0.100  |
| SND4 | 2006 | 288 | 17 | 21 | 8.252  | P | 0.200 | 0.136  |
| SNE5 | 2006 | 288 | 17 | 21 | 9.279  | P | 0.200 | -0.079 |
| SND5 | 2006 | 288 | 17 | 21 | 9.882  | P | 0.200 | -0.260 |
| SN93 | 2006 | 288 | 17 | 21 | 9.181  | P | 0.200 | 0.231  |
| SNC5 | 2006 | 288 | 17 | 21 | 10.448 | P | 0.200 | -0.353 |
| SNA4 | 2006 | 288 | 17 | 21 | 10.474 | P | 0.200 | -0.030 |
| YBH  | 2006 | 288 | 17 | 21 | 9.774  | P | 0.200 | 1.121  |
| LAVA | 2006 | 288 | 17 | 21 | 9.926  | P | 0.200 | -0.002 |
| CMB  | 2006 | 288 | 17 | 21 | 10.012 | P | 0.200 | -0.001 |
| SNF6 | 2006 | 288 | 17 | 21 | 11.253 | P | 0.200 | 0.326  |
| SNB5 | 2006 | 288 | 17 | 21 | 11.282 | P | 0.200 | -0.217 |
| SNE6 | 2006 | 288 | 17 | 21 | 11.727 | P | 0.200 | 0.027  |
| T06C | 2006 | 288 | 17 | 21 | 11.145 | P | 0.200 | -0.336 |
| HUMO | 2006 | 288 | 17 | 21 | 11.513 | P | 0.200 | 0.829  |
| CIA  | 2006 | 288 | 17 | 21 | 11.535 | P | 0.200 | -0.831 |
| VES  | 2006 | 288 | 17 | 21 | 11.995 | P | 0.200 | -0.631 |
| OSI  | 2006 | 288 | 17 | 21 | 12.230 | P | 0.200 | -0.374 |
| RCT  | 2006 | 288 | 17 | 21 | 12.253 | P | 0.200 | -0.532 |
| ARV  | 2006 | 288 | 17 | 21 | 12.291 | P | 0.200 | -0.562 |
| RPV  | 2006 | 288 | 17 | 21 | 12.574 | P | 0.200 | -0.435 |
| DJJ  | 2006 | 288 | 17 | 21 | 12.709 | P | 0.200 | -0.612 |
| S06C | 2006 | 288 | 17 | 21 | 12.792 | P | 0.200 | -0.370 |
| SNE7 | 2006 | 288 | 17 | 21 | 14.002 | P | 0.200 | 0.372  |
| SN43 | 2006 | 288 | 17 | 21 | 14.033 | P | 0.200 | -0.247 |
| SND7 | 2006 | 288 | 17 | 21 | 14.053 | P | 0.200 | 0.227  |
| FMP  | 2006 | 288 | 17 | 21 | 13.234 | P | 0.200 | -0.511 |
| SNC7 | 2006 | 288 | 17 | 21 | 14.260 | P | 0.200 | 0.193  |
| O05C | 2006 | 288 | 17 | 21 | 13.293 | P | 0.200 | 0.609  |
| O04C | 2006 | 288 | 17 | 21 | 13.298 | P | 0.200 | 0.276  |
| SNB7 | 2006 | 288 | 17 | 21 | 14.627 | P | 0.200 | -0.107 |
| DEC  | 2006 | 288 | 17 | 21 | 13.679 | P | 0.200 | -0.795 |
| SN96 | 2006 | 288 | 17 | 21 | 13.687 | P | 0.200 | -0.041 |
| R05C | 2006 | 288 | 17 | 21 | 14.258 | P | 0.200 | 0.029  |
| M04C | 2006 | 288 | 17 | 21 | 14.540 | P | 0.200 | 0.721  |

|      |      |     |    |    |        |   |       |        |
|------|------|-----|----|----|--------|---|-------|--------|
| PAS  | 2006 | 288 | 17 | 21 | 14.597 | P | 0.200 | -0.755 |
| J03A | 2006 | 288 | 17 | 21 | 14.656 | P | 0.200 | 0.983  |
| HELL | 2006 | 288 | 17 | 21 | 14.835 | P | 0.200 | -0.469 |
| SND8 | 2006 | 288 | 17 | 21 | 16.226 | P | 0.200 | 0.204  |
| SN97 | 2006 | 288 | 17 | 21 | 16.309 | P | 0.200 | 0.140  |
| SNA7 | 2006 | 288 | 17 | 21 | 16.404 | P | 0.200 | 0.126  |
| L04A | 2006 | 288 | 17 | 21 | 15.499 | P | 0.200 | 0.424  |
| MWC  | 2006 | 288 | 17 | 21 | 15.717 | P | 0.200 | -0.805 |
| VCS  | 2006 | 288 | 17 | 21 | 15.811 | P | 0.200 | -0.623 |
| BEK  | 2006 | 288 | 17 | 21 | 16.009 | P | 0.200 | 0.084  |
| CHF  | 2006 | 288 | 17 | 21 | 16.100 | P | 0.200 | -0.842 |
| ISA  | 2006 | 288 | 17 | 21 | 16.319 | P | 0.200 | -0.189 |
| M05C | 2006 | 288 | 17 | 21 | 16.764 | P | 0.200 | 0.463  |
| ELFS | 2006 | 288 | 17 | 21 | 16.805 | P | 0.200 | 0.624  |
| SNA8 | 2006 | 288 | 17 | 21 | 18.334 | P | 0.200 | 0.105  |
| SDD  | 2006 | 288 | 17 | 21 | 17.594 | P | 0.200 | -0.210 |
| EDW2 | 2006 | 288 | 17 | 21 | 17.747 | P | 0.200 | -0.350 |
| R06C | 2006 | 288 | 17 | 21 | 17.890 | P | 0.200 | 0.413  |
| WCN  | 2006 | 288 | 17 | 21 | 18.005 | P | 0.200 | 0.140  |
| BFS  | 2006 | 288 | 17 | 21 | 18.094 | P | 0.200 | -1.113 |
| K04A | 2006 | 288 | 17 | 21 | 18.251 | P | 0.200 | 0.576  |
| P06A | 2006 | 288 | 17 | 21 | 18.404 | P | 0.200 | 0.253  |
| R07C | 2006 | 288 | 17 | 21 | 19.170 | P | 0.200 | 0.343  |
| M06C | 2006 | 288 | 17 | 21 | 20.158 | P | 0.200 | 0.473  |
| O06A | 2006 | 288 | 17 | 21 | 20.330 | P | 0.200 | 0.231  |
| CWC  | 2006 | 288 | 17 | 21 | 20.998 | P | 0.200 | -0.005 |
| ADO  | 2006 | 288 | 17 | 21 | 21.165 | P | 0.200 | -0.118 |
| LRL  | 2006 | 288 | 17 | 21 | 21.280 | P | 0.200 | -0.204 |
| VTV  | 2006 | 288 | 17 | 21 | 21.546 | P | 0.200 | -0.457 |
| TIN  | 2006 | 288 | 17 | 21 | 21.830 | P | 0.200 | 0.472  |
| N06A | 2006 | 288 | 17 | 21 | 22.290 | P | 0.200 | 0.354  |
| SVD  | 2006 | 288 | 17 | 21 | 22.707 | P | 0.200 | -0.057 |
| Q07A | 2006 | 288 | 17 | 21 | 22.800 | P | 0.200 | 0.147  |
| S08C | 2006 | 288 | 17 | 21 | 23.716 | P | 0.200 | 0.588  |
| K05A | 2006 | 288 | 17 | 21 | 23.806 | P | 0.200 | 0.951  |
| J05A | 2006 | 288 | 17 | 21 | 24.012 | P | 0.200 | 0.946  |
| MPM  | 2006 | 288 | 17 | 21 | 24.248 | P | 0.200 | 0.210  |
| BBR  | 2006 | 288 | 17 | 21 | 24.249 | P | 0.200 | -0.188 |
| RRX  | 2006 | 288 | 17 | 21 | 24.451 | P | 0.200 | -0.374 |
| SLA  | 2006 | 288 | 17 | 21 | 25.057 | P | 0.200 | 0.061  |
| R08A | 2006 | 288 | 17 | 21 | 25.372 | P | 0.200 | -0.126 |
| O07A | 2006 | 288 | 17 | 21 | 26.146 | P | 0.200 | 0.319  |
| GSC  | 2006 | 288 | 17 | 21 | 26.857 | P | 0.200 | -0.178 |
| GRA  | 2006 | 288 | 17 | 21 | 27.256 | P | 0.200 | 0.386  |
| N07B | 2006 | 288 | 17 | 21 | 27.563 | P | 0.200 | 0.435  |
| Q08A | 2006 | 288 | 17 | 21 | 27.840 | P | 0.200 | -0.040 |
| M07A | 2006 | 288 | 17 | 21 | 28.508 | P | 0.200 | 0.494  |
| HEC  | 2006 | 288 | 17 | 21 | 28.850 | P | 0.200 | -0.383 |
| FUR  | 2006 | 288 | 17 | 21 | 29.010 | P | 0.200 | 0.188  |
| S09A | 2006 | 288 | 17 | 21 | 29.492 | P | 0.200 | -0.093 |
| L07A | 2006 | 288 | 17 | 21 | 29.902 | P | 0.200 | 0.791  |
| TPH  | 2006 | 288 | 17 | 21 | 30.463 | P | 0.200 | 0.014  |
| O08A | 2006 | 288 | 17 | 21 | 31.136 | P | 0.200 | 0.453  |
| SHO  | 2006 | 288 | 17 | 21 | 31.367 | P | 0.200 | -0.284 |
| R09A | 2006 | 288 | 17 | 21 | 31.876 | P | 0.200 | 0.013  |
| N08A | 2006 | 288 | 17 | 21 | 32.691 | P | 0.200 | 0.554  |
| Q09A | 2006 | 288 | 17 | 21 | 32.846 | P | 0.200 | 0.261  |
| TUQ  | 2006 | 288 | 17 | 21 | 33.072 | P | 0.200 | -0.207 |
| P09A | 2006 | 288 | 17 | 21 | 34.809 | P | 0.200 | 0.126  |
| O09A | 2006 | 288 | 17 | 21 | 36.657 | P | 0.200 | 0.554  |
| V11A | 2006 | 288 | 17 | 21 | 37.302 | P | 0.200 | 0.106  |
| U11A | 2006 | 288 | 17 | 21 | 39.025 | P | 0.200 | 0.369  |
| P10A | 2006 | 288 | 17 | 21 | 39.281 | P | 0.200 | 0.255  |

|      |      |     |    |         |          |            |         |        |     |       |
|------|------|-----|----|---------|----------|------------|---------|--------|-----|-------|
| Q11A | 2006 | 288 | 17 | 21      | 42.395   | P          | 0.200   | 0.328  |     |       |
| 2006 | 288  | 17  | 7  | 51.9504 | 19.87800 | -155.93500 | 38.9000 |        | 232 | 0.000 |
| FARB | 2006 | 288 | 17 | 14      | 28.057   | P          | 0.200   | -0.745 |     |       |
| MCCM | 2006 | 288 | 17 | 14      | 30.328   | P          | 0.200   | -0.784 |     |       |
| BNLO | 2006 | 288 | 17 | 14      | 31.621   | P          | 0.200   | -0.811 |     |       |
| JRSC | 2006 | 288 | 17 | 14      | 32.154   | P          | 0.200   | -0.580 |     |       |
| HOPS | 2006 | 288 | 17 | 14      | 32.709   | P          | 0.200   | -0.124 |     |       |
| BRK  | 2006 | 288 | 17 | 14      | 33.671   | P          | 0.200   | -0.440 |     |       |
| CVS  | 2006 | 288 | 17 | 14      | 33.745   | P          | 0.200   | -0.740 |     |       |
| HAST | 2006 | 288 | 17 | 14      | 33.747   | P          | 0.200   | -0.466 |     |       |
| BKS  | 2006 | 288 | 17 | 14      | 33.990   | P          | 0.200   | -0.365 |     |       |
| BRIB | 2006 | 288 | 17 | 14      | 34.709   | P          | 0.200   | -0.230 |     |       |
| V03C | 2006 | 288 | 17 | 14      | 35.148   | P          | 0.200   | -0.130 |     |       |
| SAO  | 2006 | 288 | 17 | 14      | 35.515   | P          | 0.200   | -0.542 |     |       |
| RAMR | 2006 | 288 | 17 | 14      | 36.398   | P          | 0.200   | -0.366 |     |       |
| MHC  | 2006 | 288 | 17 | 14      | 36.480   | P          | 0.200   | -0.115 |     |       |
| WENL | 2006 | 288 | 17 | 14      | 36.517   | P          | 0.200   | 0.003  |     |       |
| MNRC | 2006 | 288 | 17 | 14      | 36.667   | P          | 0.200   | 0.315  |     |       |
| BDM  | 2006 | 288 | 17 | 14      | 36.780   | P          | 0.200   | -0.061 |     |       |
| PACP | 2006 | 288 | 17 | 14      | 37.720   | P          | 0.200   | -0.138 |     |       |
| PHL  | 2006 | 288 | 17 | 14      | 38.032   | P          | 0.200   | -0.317 |     |       |
| GASB | 2006 | 288 | 17 | 14      | 38.314   | P          | 0.200   | 0.777  |     |       |
| Q03C | 2006 | 288 | 17 | 14      | 38.776   | P          | 0.200   | 0.683  |     |       |
| N02C | 2006 | 288 | 17 | 14      | 38.855   | P          | 0.200   | 0.482  |     |       |
| S04C | 2006 | 288 | 17 | 14      | 38.994   | P          | 0.200   | 0.104  |     |       |
| PKD  | 2006 | 288 | 17 | 14      | 39.495   | P          | 0.200   | -0.176 |     |       |
| O02C | 2006 | 288 | 17 | 14      | 39.661   | P          | 0.200   | 0.691  |     |       |
| SNCC | 2006 | 288 | 17 | 14      | 40.200   | P          | 0.200   | -0.282 |     |       |
| SCZ2 | 2006 | 288 | 17 | 14      | 40.553   | P          | 0.200   | -0.756 |     |       |
| SUTB | 2006 | 288 | 17 | 14      | 41.100   | P          | 0.200   | -0.522 |     |       |
| SBC  | 2006 | 288 | 17 | 14      | 41.372   | P          | 0.200   | -0.253 |     |       |
| SMM  | 2006 | 288 | 17 | 14      | 41.847   | P          | 0.200   | -0.033 |     |       |
| T05C | 2006 | 288 | 17 | 14      | 41.871   | P          | 0.200   | 0.498  |     |       |
| MPP  | 2006 | 288 | 17 | 14      | 42.066   | P          | 0.200   | -0.190 |     |       |
| WDC  | 2006 | 288 | 17 | 14      | 42.233   | P          | 0.200   | 0.332  |     |       |
| Q04C | 2006 | 288 | 17 | 14      | 42.308   | P          | 0.200   | -0.430 |     |       |
| O03C | 2006 | 288 | 17 | 14      | 42.956   | P          | 0.200   | 0.277  |     |       |
| SNB3 | 2006 | 288 | 17 | 14      | 44.107   | P          | 0.200   | -0.269 |     |       |
| SNE4 | 2006 | 288 | 17 | 14      | 44.160   | P          | 0.200   | -0.157 |     |       |
| R04C | 2006 | 288 | 17 | 14      | 43.191   | P          | 0.200   | -0.545 |     |       |
| SNG5 | 2006 | 288 | 17 | 14      | 44.759   | P          | 0.200   | -0.122 |     |       |
| U05C | 2006 | 288 | 17 | 14      | 43.858   | P          | 0.200   | 0.330  |     |       |
| M02C | 2006 | 288 | 17 | 14      | 44.006   | P          | 0.200   | 0.741  |     |       |
| S05C | 2006 | 288 | 17 | 14      | 44.226   | P          | 0.200   | -0.685 |     |       |
| ORV  | 2006 | 288 | 17 | 14      | 44.253   | P          | 0.200   | -0.107 |     |       |
| V05C | 2006 | 288 | 17 | 14      | 44.287   | P          | 0.200   | 0.514  |     |       |
| SNC4 | 2006 | 288 | 17 | 14      | 45.528   | P          | 0.200   | -0.010 |     |       |
| SNA3 | 2006 | 288 | 17 | 14      | 45.655   | P          | 0.200   | 0.084  |     |       |
| SND4 | 2006 | 288 | 17 | 14      | 44.786   | P          | 0.200   | 0.026  |     |       |
| SNE5 | 2006 | 288 | 17 | 14      | 45.929   | P          | 0.200   | -0.091 |     |       |
| SND5 | 2006 | 288 | 17 | 14      | 46.466   | P          | 0.200   | -0.320 |     |       |
| SN93 | 2006 | 288 | 17 | 14      | 45.756   | P          | 0.200   | 0.219  |     |       |
| SNA4 | 2006 | 288 | 17 | 14      | 47.014   | P          | 0.200   | -0.091 |     |       |
| SNC5 | 2006 | 288 | 17 | 14      | 47.069   | P          | 0.200   | -0.360 |     |       |
| YBH  | 2006 | 288 | 17 | 14      | 46.370   | P          | 0.200   | 0.913  |     |       |
| TOV  | 2006 | 288 | 17 | 14      | 46.505   | P          | 0.200   | -0.692 |     |       |
| LAVA | 2006 | 288 | 17 | 14      | 46.535   | P          | 0.200   | -0.010 |     |       |
| CMB  | 2006 | 288 | 17 | 14      | 46.626   | P          | 0.200   | 0.041  |     |       |
| SNF6 | 2006 | 288 | 17 | 14      | 47.715   | P          | 0.200   | 0.121  |     |       |
| SNB5 | 2006 | 288 | 17 | 14      | 47.839   | P          | 0.200   | -0.275 |     |       |
| SNE6 | 2006 | 288 | 17 | 14      | 48.323   | P          | 0.200   | -0.030 |     |       |
| T06C | 2006 | 288 | 17 | 14      | 47.640   | P          | 0.200   | -0.343 |     |       |

|      |      |     |    |    |        |   |       |        |
|------|------|-----|----|----|--------|---|-------|--------|
| CIA  | 2006 | 288 | 17 | 14 | 48.003 | P | 0.200 | -0.643 |
| HUMO | 2006 | 288 | 17 | 14 | 48.100 | P | 0.200 | 0.573  |
| VES  | 2006 | 288 | 17 | 14 | 48.464 | P | 0.200 | -0.589 |
| RCT  | 2006 | 288 | 17 | 14 | 48.600 | P | 0.200 | -0.640 |
| OSI  | 2006 | 288 | 17 | 14 | 48.624 | P | 0.200 | -0.331 |
| DBO  | 2006 | 288 | 17 | 14 | 48.638 | P | 0.200 | 0.499  |
| ARV  | 2006 | 288 | 17 | 14 | 48.816 | P | 0.200 | -0.415 |
| RPV  | 2006 | 288 | 17 | 14 | 48.912 | P | 0.200 | -0.393 |
| DJJ  | 2006 | 288 | 17 | 14 | 49.068 | P | 0.200 | -0.569 |
| S06C | 2006 | 288 | 17 | 14 | 49.285 | P | 0.200 | -0.425 |
| HATC | 2006 | 288 | 17 | 14 | 49.387 | P | 0.200 | 0.137  |
| SNE7 | 2006 | 288 | 17 | 14 | 50.509 | P | 0.200 | 0.220  |
| FMP  | 2006 | 288 | 17 | 14 | 49.567 | P | 0.200 | -0.468 |
| SN43 | 2006 | 288 | 17 | 14 | 50.593 | P | 0.200 | -0.203 |
| SND7 | 2006 | 288 | 17 | 14 | 50.698 | P | 0.200 | 0.226  |
| SNC7 | 2006 | 288 | 17 | 14 | 50.735 | P | 0.200 | 0.038  |
| O04C | 2006 | 288 | 17 | 14 | 49.788 | P | 0.200 | 0.074  |
| O05C | 2006 | 288 | 17 | 14 | 49.862 | P | 0.200 | 0.505  |
| SNB7 | 2006 | 288 | 17 | 14 | 51.134 | P | 0.200 | -0.213 |
| SN96 | 2006 | 288 | 17 | 14 | 50.164 | P | 0.200 | -0.146 |
| DEC  | 2006 | 288 | 17 | 14 | 50.195 | P | 0.200 | -0.598 |
| R05C | 2006 | 288 | 17 | 14 | 50.697 | P | 0.200 | -0.125 |
| USC  | 2006 | 288 | 17 | 14 | 50.708 | P | 0.200 | 0.132  |
| PAS  | 2006 | 288 | 17 | 14 | 51.103 | P | 0.200 | -0.563 |
| M04C | 2006 | 288 | 17 | 14 | 51.213 | P | 0.200 | 0.619  |
| HELL | 2006 | 288 | 17 | 14 | 51.246 | P | 0.200 | -0.527 |
| J03A | 2006 | 288 | 17 | 14 | 51.322 | P | 0.200 | 0.781  |
| SN97 | 2006 | 288 | 17 | 14 | 52.846 | P | 0.200 | 0.084  |
| SND8 | 2006 | 288 | 17 | 14 | 52.862 | P | 0.200 | 0.197  |
| SNA7 | 2006 | 288 | 17 | 14 | 53.053 | P | 0.200 | 0.173  |
| I03A | 2006 | 288 | 17 | 14 | 52.056 | P | 0.200 | 0.545  |
| MWC  | 2006 | 288 | 17 | 14 | 52.175 | P | 0.200 | -0.662 |
| L04A | 2006 | 288 | 17 | 14 | 52.239 | P | 0.200 | 0.374  |
| VCS  | 2006 | 288 | 17 | 14 | 52.284 | P | 0.200 | -0.480 |
| CHF  | 2006 | 288 | 17 | 14 | 52.564 | P | 0.200 | -0.698 |
| BEK  | 2006 | 288 | 17 | 14 | 52.609 | P | 0.200 | 0.029  |
| ISA  | 2006 | 288 | 17 | 14 | 52.764 | P | 0.200 | -0.149 |
| ELFS | 2006 | 288 | 17 | 14 | 53.298 | P | 0.200 | 0.422  |
| M05C | 2006 | 288 | 17 | 14 | 53.451 | P | 0.200 | 0.410  |
| SNA8 | 2006 | 288 | 17 | 14 | 54.779 | P | 0.200 | -0.052 |
| SDD  | 2006 | 288 | 17 | 14 | 53.906 | P | 0.200 | -0.170 |
| EDW2 | 2006 | 288 | 17 | 14 | 54.139 | P | 0.200 | -0.313 |
| R06C | 2006 | 288 | 17 | 14 | 54.303 | P | 0.200 | 0.254  |
| WCN  | 2006 | 288 | 17 | 14 | 54.514 | P | 0.200 | 0.035  |
| BFS  | 2006 | 288 | 17 | 14 | 54.545 | P | 0.200 | -0.974 |
| K04A | 2006 | 288 | 17 | 14 | 54.854 | P | 0.200 | 0.373  |
| P06A | 2006 | 288 | 17 | 14 | 54.884 | P | 0.200 | 0.095  |
| SNB9 | 2006 | 288 | 17 | 14 | 55.939 | P | 0.200 | 0.168  |
| R07C | 2006 | 288 | 17 | 14 | 55.553 | P | 0.200 | 0.183  |
| MLAC | 2006 | 288 | 17 | 14 | 55.986 | P | 0.200 | 0.453  |
| M06C | 2006 | 288 | 17 | 14 | 56.820 | P | 0.200 | 0.415  |
| O06A | 2006 | 288 | 17 | 14 | 56.980 | P | 0.200 | 0.223  |
| CWC  | 2006 | 288 | 17 | 14 | 57.375 | P | 0.200 | -0.064 |
| ADO  | 2006 | 288 | 17 | 14 | 57.478 | P | 0.200 | -0.127 |
| LRL  | 2006 | 288 | 17 | 14 | 57.698 | P | 0.200 | -0.160 |
| VTV  | 2006 | 288 | 17 | 14 | 58.007 | P | 0.200 | -0.314 |
| L05A | 2006 | 288 | 17 | 14 | 58.171 | P | 0.200 | 0.733  |
| TIN  | 2006 | 288 | 17 | 14 | 58.242 | P | 0.200 | 0.415  |
| N06A | 2006 | 288 | 17 | 14 | 58.866 | P | 0.200 | 0.246  |
| SVD  | 2006 | 288 | 17 | 14 | 59.038 | P | 0.200 | -0.016 |
| Q07A | 2006 | 288 | 17 | 14 | 59.218 | P | 0.200 | -0.005 |
| S08C | 2006 | 288 | 17 | 15 | 0.098  | P | 0.200 | 0.484  |
| K05A | 2006 | 288 | 17 | 15 | 0.390  | P | 0.200 | 0.750  |



|      |      |     |    |    |        |   |       |        |
|------|------|-----|----|----|--------|---|-------|--------|
| J05A | 2006 | 288 | 17 | 15 | 0.576  | P | 0.200 | 0.694  |
| MPM  | 2006 | 288 | 17 | 15 | 0.592  | P | 0.200 | 0.154  |
| BBR  | 2006 | 288 | 17 | 15 | 0.686  | P | 0.200 | -0.042 |
| RRX  | 2006 | 288 | 17 | 15 | 0.872  | P | 0.200 | -0.280 |
| P07A | 2006 | 288 | 17 | 15 | 0.995  | P | 0.200 | 0.563  |
| SLA  | 2006 | 288 | 17 | 15 | 1.487  | P | 0.200 | 0.104  |
| R08A | 2006 | 288 | 17 | 15 | 1.895  | P | 0.200 | -0.131 |
| O07A | 2006 | 288 | 17 | 15 | 2.720  | P | 0.200 | 0.262  |
| GSC  | 2006 | 288 | 17 | 15 | 3.247  | P | 0.200 | -0.137 |
| GRA  | 2006 | 288 | 17 | 15 | 3.794  | P | 0.200 | 0.478  |
| N07B | 2006 | 288 | 17 | 15 | 4.217  | P | 0.200 | 0.428  |
| Q08A | 2006 | 288 | 17 | 15 | 4.332  | P | 0.200 | -0.099 |
| M07A | 2006 | 288 | 17 | 15 | 5.193  | P | 0.200 | 0.487  |
| HEC  | 2006 | 288 | 17 | 15 | 5.205  | P | 0.200 | -0.341 |
| FUR  | 2006 | 288 | 17 | 15 | 5.511  | P | 0.200 | 0.280  |
| S09A | 2006 | 288 | 17 | 15 | 6.063  | P | 0.200 | -0.003 |
| P08A | 2006 | 288 | 17 | 15 | 6.335  | P | 0.200 | 0.432  |
| L07A | 2006 | 288 | 17 | 15 | 6.567  | P | 0.200 | 0.732  |
| TPH  | 2006 | 288 | 17 | 15 | 6.952  | P | 0.200 | 0.006  |
| O08A | 2006 | 288 | 17 | 15 | 7.648  | P | 0.200 | 0.347  |
| SHO  | 2006 | 288 | 17 | 15 | 7.827  | P | 0.200 | -0.191 |
| R09A | 2006 | 288 | 17 | 15 | 8.369  | P | 0.200 | 0.005  |
| U10A | 2006 | 288 | 17 | 15 | 9.199  | P | 0.200 | 0.421  |
| Q09A | 2006 | 288 | 17 | 15 | 9.269  | P | 0.200 | 0.153  |
| N08A | 2006 | 288 | 17 | 15 | 9.274  | P | 0.200 | 0.499  |
| TUQ  | 2006 | 288 | 17 | 15 | 9.450  | P | 0.200 | -0.166 |
| P09A | 2006 | 288 | 17 | 15 | 11.313 | P | 0.200 | 0.067  |
| O09A | 2006 | 288 | 17 | 15 | 13.090 | P | 0.200 | 0.392  |
| BMN  | 2006 | 288 | 17 | 15 | 13.556 | P | 0.200 | 0.302  |
| R10A | 2006 | 288 | 17 | 15 | 13.584 | P | 0.200 | 0.353  |
| V11A | 2006 | 288 | 17 | 15 | 13.791 | P | 0.200 | 0.240  |
| U11A | 2006 | 288 | 17 | 15 | 15.392 | P | 0.200 | 0.352  |
| P10A | 2006 | 288 | 17 | 15 | 15.672 | P | 0.200 | 0.088  |
| Q11A | 2006 | 288 | 17 | 15 | 18.833 | P | 0.200 | 0.266  |

|      |      |     |    |         |          |           |         |        |       |
|------|------|-----|----|---------|----------|-----------|---------|--------|-------|
| 2006 | 244  | 10  | 18 | 52.3802 | -6.75900 | 155.51199 | 38.0000 | 212    | 0.001 |
| JCC  | 2006 | 244 | 10 | 31      | 35.175   | P         | 0.200   | 0.315  |       |
| K01A | 2006 | 244 | 10 | 31      | 35.298   | P         | 0.200   | 0.215  |       |
| O01C | 2006 | 244 | 10 | 31      | 35.341   | P         | 0.200   | 0.366  |       |
| FARB | 2006 | 244 | 10 | 31      | 35.482   | P         | 0.200   | -0.291 |       |
| M01C | 2006 | 244 | 10 | 31      | 35.826   | P         | 0.200   | 0.460  |       |
| P01C | 2006 | 244 | 10 | 31      | 36.318   | P         | 0.200   | 0.140  |       |
| MCCM | 2006 | 244 | 10 | 31      | 36.318   | P         | 0.200   | -0.333 |       |
| HOPS | 2006 | 244 | 10 | 31      | 36.707   | P         | 0.200   | -0.023 |       |
| N02C | 2006 | 244 | 10 | 31      | 37.744   | P         | 0.200   | 0.265  |       |
| L02A | 2006 | 244 | 10 | 31      | 38.019   | P         | 0.200   | 0.328  |       |
| CVS  | 2006 | 244 | 10 | 31      | 38.036   | P         | 0.200   | -0.477 |       |
| JRSC | 2006 | 244 | 10 | 31      | 38.358   | P         | 0.200   | -0.063 |       |
| BNLO | 2006 | 244 | 10 | 31      | 38.427   | P         | 0.200   | -0.092 |       |
| BRK  | 2006 | 244 | 10 | 31      | 38.515   | P         | 0.200   | -0.236 |       |
| BKS  | 2006 | 244 | 10 | 31      | 38.761   | P         | 0.200   | -0.134 |       |
| J02A | 2006 | 244 | 10 | 31      | 38.768   | P         | 0.200   | 0.037  |       |
| BRIB | 2006 | 244 | 10 | 31      | 39.304   | P         | 0.200   | 0.219  |       |
| O02C | 2006 | 244 | 10 | 31      | 39.308   | P         | 0.200   | 0.451  |       |
| MNRC | 2006 | 244 | 10 | 31      | 39.392   | P         | 0.200   | 0.389  |       |
| GASB | 2006 | 244 | 10 | 31      | 39.417   | P         | 0.200   | 0.713  |       |
| DBO  | 2006 | 244 | 10 | 31      | 39.663   | P         | 0.200   | -0.109 |       |
| WDC  | 2006 | 244 | 10 | 31      | 40.028   | P         | 0.200   | 0.068  |       |
| M02C | 2006 | 244 | 10 | 31      | 40.130   | P         | 0.200   | 0.529  |       |
| I03A | 2006 | 244 | 10 | 31      | 40.263   | P         | 0.200   | -0.025 |       |
| WENL | 2006 | 244 | 10 | 31      | 40.513   | P         | 0.200   | 0.122  |       |
| HAST | 2006 | 244 | 10 | 31      | 40.546   | P         | 0.200   | 0.321  |       |
| BDM  | 2006 | 244 | 10 | 31      | 40.582   | P         | 0.200   | 0.385  |       |

|      |      |     |    |    |        |   |       |        |
|------|------|-----|----|----|--------|---|-------|--------|
| YBH  | 2006 | 244 | 10 | 31 | 40.722 | P | 0.200 | 0.305  |
| Q03C | 2006 | 244 | 10 | 31 | 40.941 | P | 0.200 | 0.789  |
| SUTB | 2006 | 244 | 10 | 31 | 40.948 | P | 0.200 | -0.697 |
| MHC  | 2006 | 244 | 10 | 31 | 40.961 | P | 0.200 | 0.094  |
| J03A | 2006 | 244 | 10 | 31 | 40.978 | P | 0.200 | 0.272  |
| O03C | 2006 | 244 | 10 | 31 | 40.993 | P | 0.200 | -0.184 |
| SAO  | 2006 | 244 | 10 | 31 | 41.030 | P | 0.200 | 0.037  |
| SNG5 | 2006 | 244 | 10 | 31 | 42.564 | P | 0.200 | -0.294 |
| M03C | 2006 | 244 | 10 | 31 | 41.776 | P | 0.200 | -0.391 |
| V03C | 2006 | 244 | 10 | 31 | 41.793 | P | 0.200 | 0.675  |
| SNE4 | 2006 | 244 | 10 | 31 | 43.028 | P | 0.200 | -0.047 |
| S04C | 2006 | 244 | 10 | 31 | 42.049 | P | 0.200 | 0.092  |
| PACP | 2006 | 244 | 10 | 31 | 42.064 | P | 0.200 | 0.227  |
| SNC3 | 2006 | 244 | 10 | 31 | 43.307 | P | 0.200 | 0.119  |
| Q04C | 2006 | 244 | 10 | 31 | 42.560 | P | 0.200 | -0.063 |
| ORV  | 2006 | 244 | 10 | 31 | 42.579 | P | 0.200 | -0.282 |
| RAMR | 2006 | 244 | 10 | 31 | 42.676 | P | 0.200 | 0.431  |
| SNE5 | 2006 | 244 | 10 | 31 | 43.852 | P | 0.200 | -0.209 |
| SNC4 | 2006 | 244 | 10 | 31 | 44.155 | P | 0.200 | -0.171 |
| SNF6 | 2006 | 244 | 10 | 31 | 44.284 | P | 0.200 | -0.339 |
| L04A | 2006 | 244 | 10 | 31 | 43.310 | P | 0.200 | -0.337 |
| M04C | 2006 | 244 | 10 | 31 | 43.320 | P | 0.200 | -0.126 |
| SND5 | 2006 | 244 | 10 | 31 | 44.384 | P | 0.200 | -0.275 |
| R04C | 2006 | 244 | 10 | 31 | 43.507 | P | 0.200 | -0.364 |
| SND4 | 2006 | 244 | 10 | 31 | 43.609 | P | 0.200 | -0.080 |
| PHL  | 2006 | 244 | 10 | 31 | 43.680 | P | 0.200 | 0.377  |
| U04C | 2006 | 244 | 10 | 31 | 43.747 | P | 0.200 | 0.556  |
| SNC5 | 2006 | 244 | 10 | 31 | 44.846 | P | 0.200 | -0.381 |
| HATC | 2006 | 244 | 10 | 31 | 43.861 | P | 0.200 | -0.257 |
| SNA3 | 2006 | 244 | 10 | 31 | 44.925 | P | 0.200 | 0.134  |
| PKD  | 2006 | 244 | 10 | 31 | 43.940 | P | 0.200 | 0.268  |
| SNE6 | 2006 | 244 | 10 | 31 | 45.103 | P | 0.200 | -0.252 |
| K04A | 2006 | 244 | 10 | 31 | 44.210 | P | 0.200 | -0.338 |
| T05C | 2006 | 244 | 10 | 31 | 44.499 | P | 0.200 | 0.565  |
| SNA4 | 2006 | 244 | 10 | 31 | 45.543 | P | 0.200 | -0.045 |
| SNB5 | 2006 | 244 | 10 | 31 | 45.600 | P | 0.200 | -0.240 |
| O04C | 2006 | 244 | 10 | 31 | 44.842 | P | 0.200 | -0.201 |
| LAVA | 2006 | 244 | 10 | 31 | 44.843 | P | 0.200 | -0.165 |
| SNE7 | 2006 | 244 | 10 | 31 | 45.867 | P | 0.200 | -0.127 |
| S05C | 2006 | 244 | 10 | 31 | 45.148 | P | 0.200 | -0.371 |
| O05C | 2006 | 244 | 10 | 31 | 45.213 | P | 0.200 | 0.033  |
| SN93 | 2006 | 244 | 10 | 31 | 45.283 | P | 0.200 | 0.249  |
| M05C | 2006 | 244 | 10 | 31 | 45.330 | P | 0.200 | -0.338 |
| SNA5 | 2006 | 244 | 10 | 31 | 46.450 | P | 0.200 | -0.215 |
| CMB  | 2006 | 244 | 10 | 31 | 45.689 | P | 0.200 | -0.060 |
| SCZ2 | 2006 | 244 | 10 | 31 | 45.788 | P | 0.200 | -0.044 |
| SMM  | 2006 | 244 | 10 | 31 | 45.887 | P | 0.200 | 0.436  |
| SNB6 | 2006 | 244 | 10 | 31 | 46.942 | P | 0.200 | -0.106 |
| SNC7 | 2006 | 244 | 10 | 31 | 46.965 | P | 0.200 | 0.079  |
| U05C | 2006 | 244 | 10 | 31 | 46.095 | P | 0.200 | 0.567  |
| P05C | 2006 | 244 | 10 | 31 | 46.122 | P | 0.200 | 0.060  |
| SBC  | 2006 | 244 | 10 | 31 | 46.141 | P | 0.200 | 0.335  |
| SNCC | 2006 | 244 | 10 | 31 | 46.203 | P | 0.200 | 0.389  |
| MPP  | 2006 | 244 | 10 | 31 | 46.427 | P | 0.200 | 0.439  |
| SNB7 | 2006 | 244 | 10 | 31 | 47.458 | P | 0.200 | -0.156 |
| ELFS | 2006 | 244 | 10 | 31 | 46.473 | P | 0.200 | -0.039 |
| SND8 | 2006 | 244 | 10 | 31 | 47.488 | P | 0.200 | -0.094 |
| J05A | 2006 | 244 | 10 | 31 | 46.708 | P | 0.200 | -0.059 |
| V05C | 2006 | 244 | 10 | 31 | 46.775 | P | 0.200 | 0.779  |
| BEK  | 2006 | 244 | 10 | 31 | 47.070 | P | 0.200 | -0.312 |
| L05A | 2006 | 244 | 10 | 31 | 47.126 | P | 0.200 | -0.213 |
| T06C | 2006 | 244 | 10 | 31 | 47.340 | P | 0.200 | -0.262 |
| K05A | 2006 | 244 | 10 | 31 | 47.433 | P | 0.200 | -0.122 |

|      |      |     |    |    |        |   |       |        |
|------|------|-----|----|----|--------|---|-------|--------|
| S06C | 2006 | 244 | 10 | 31 | 47.436 | P | 0.200 | -0.449 |
| SN96 | 2006 | 244 | 10 | 31 | 47.553 | P | 0.200 | -0.090 |
| R05C | 2006 | 244 | 10 | 31 | 47.644 | P | 0.200 | 0.007  |
| SNA7 | 2006 | 244 | 10 | 31 | 48.657 | P | 0.200 | 0.142  |
| M06C | 2006 | 244 | 10 | 31 | 47.679 | P | 0.200 | -0.172 |
| SN97 | 2006 | 244 | 10 | 31 | 48.688 | P | 0.200 | 0.038  |
| SN43 | 2006 | 244 | 10 | 31 | 48.742 | P | 0.200 | -0.213 |
| LGU  | 2006 | 244 | 10 | 31 | 47.942 | P | 0.200 | -0.190 |
| RCT  | 2006 | 244 | 10 | 31 | 48.282 | P | 0.200 | -0.478 |
| VES  | 2006 | 244 | 10 | 31 | 48.466 | P | 0.200 | -0.545 |
| SNA8 | 2006 | 244 | 10 | 31 | 49.665 | P | 0.200 | 0.130  |
| SN55 | 2006 | 244 | 10 | 31 | 49.761 | P | 0.200 | -0.170 |
| P06A | 2006 | 244 | 10 | 31 | 48.765 | P | 0.200 | -0.034 |
| TOV  | 2006 | 244 | 10 | 31 | 48.960 | P | 0.200 | -0.073 |
| O06A | 2006 | 244 | 10 | 31 | 49.104 | P | 0.200 | -0.300 |
| WCN  | 2006 | 244 | 10 | 31 | 49.257 | P | 0.200 | 0.195  |
| N06A | 2006 | 244 | 10 | 31 | 49.535 | P | 0.200 | -0.240 |
| HELL | 2006 | 244 | 10 | 31 | 49.648 | P | 0.200 | -0.407 |
| SN24 | 2006 | 244 | 10 | 31 | 50.676 | P | 0.200 | -0.041 |
| ARV  | 2006 | 244 | 10 | 31 | 49.853 | P | 0.200 | 0.245  |
| R06C | 2006 | 244 | 10 | 31 | 49.916 | P | 0.200 | 0.250  |
| CIA  | 2006 | 244 | 10 | 31 | 50.034 | P | 0.200 | -0.204 |
| OSI  | 2006 | 244 | 10 | 31 | 50.075 | P | 0.200 | 0.182  |
| DJJ  | 2006 | 244 | 10 | 31 | 50.271 | P | 0.200 | -0.082 |
| RPV  | 2006 | 244 | 10 | 31 | 50.386 | P | 0.200 | -0.081 |
| FMP  | 2006 | 244 | 10 | 31 | 50.739 | P | 0.200 | -0.020 |
| DEC  | 2006 | 244 | 10 | 31 | 50.825 | P | 0.200 | -0.165 |
| R07C | 2006 | 244 | 10 | 31 | 50.986 | P | 0.200 | -0.001 |
| ISA  | 2006 | 244 | 10 | 31 | 51.282 | P | 0.200 | -0.067 |
| USC  | 2006 | 244 | 10 | 31 | 51.359 | P | 0.200 | 0.461  |
| PAS  | 2006 | 244 | 10 | 31 | 51.378 | P | 0.200 | -0.133 |
| MLAC | 2006 | 244 | 10 | 31 | 51.552 | P | 0.200 | 0.106  |
| MWC  | 2006 | 244 | 10 | 31 | 52.054 | P | 0.200 | -0.240 |
| Q07A | 2006 | 244 | 10 | 31 | 52.097 | P | 0.200 | -0.080 |
| VCS  | 2006 | 244 | 10 | 31 | 52.137 | P | 0.200 | 0.170  |
| M07A | 2006 | 244 | 10 | 31 | 52.265 | P | 0.200 | -0.244 |
| CHF  | 2006 | 244 | 10 | 31 | 52.294 | P | 0.200 | -0.104 |
| P07A | 2006 | 244 | 10 | 31 | 52.344 | P | 0.200 | 0.013  |
| L07A | 2006 | 244 | 10 | 31 | 52.355 | P | 0.200 | -0.014 |
| O07A | 2006 | 244 | 10 | 31 | 52.438 | P | 0.200 | -0.328 |
| N07B | 2006 | 244 | 10 | 31 | 52.509 | P | 0.200 | -0.228 |
| EDW2 | 2006 | 244 | 10 | 31 | 52.949 | P | 0.200 | 0.270  |
| TIN  | 2006 | 244 | 10 | 31 | 53.301 | P | 0.200 | 0.080  |
| SDD  | 2006 | 244 | 10 | 31 | 53.361 | P | 0.200 | 0.305  |
| CWC  | 2006 | 244 | 10 | 31 | 53.426 | P | 0.200 | -0.086 |
| BFS  | 2006 | 244 | 10 | 31 | 53.481 | P | 0.200 | -0.170 |
| S08C | 2006 | 244 | 10 | 31 | 54.190 | P | 0.200 | 0.257  |
| R08A | 2006 | 244 | 10 | 31 | 54.242 | P | 0.200 | -0.117 |
| LRL  | 2006 | 244 | 10 | 31 | 54.478 | P | 0.200 | 0.180  |
| ADO  | 2006 | 244 | 10 | 31 | 54.665 | P | 0.200 | -0.068 |
| VTV  | 2006 | 244 | 10 | 31 | 54.915 | P | 0.200 | -0.088 |
| Q08A | 2006 | 244 | 10 | 31 | 55.177 | P | 0.200 | -0.180 |
| O08A | 2006 | 244 | 10 | 31 | 55.397 | P | 0.200 | -0.042 |
| P08A | 2006 | 244 | 10 | 31 | 55.500 | P | 0.200 | 0.193  |
| MPM  | 2006 | 244 | 10 | 31 | 55.536 | P | 0.200 | 0.142  |
| N08A | 2006 | 244 | 10 | 31 | 55.567 | P | 0.200 | -0.097 |
| SVD  | 2006 | 244 | 10 | 31 | 55.782 | P | 0.200 | 0.052  |
| SLA  | 2006 | 244 | 10 | 31 | 56.053 | P | 0.200 | -0.002 |
| GRA  | 2006 | 244 | 10 | 31 | 56.330 | P | 0.200 | 0.084  |
| RRX  | 2006 | 244 | 10 | 31 | 56.399 | P | 0.200 | 0.033  |
| BBR  | 2006 | 244 | 10 | 31 | 56.492 | P | 0.200 | -0.198 |
| S09A | 2006 | 244 | 10 | 31 | 57.159 | P | 0.200 | -0.160 |
| TPH  | 2006 | 244 | 10 | 31 | 57.214 | P | 0.200 | -0.312 |

|      |      |     |    |    |        |   |       |        |
|------|------|-----|----|----|--------|---|-------|--------|
| GSC  | 2006 | 244 | 10 | 31 | 57.502 | P | 0.200 | 0.037  |
| FUR  | 2006 | 244 | 10 | 31 | 57.779 | P | 0.200 | 0.141  |
| Q09A | 2006 | 244 | 10 | 31 | 57.886 | P | 0.200 | -0.115 |
| R09A | 2006 | 244 | 10 | 31 | 57.999 | P | 0.200 | -0.180 |
| P09A | 2006 | 244 | 10 | 31 | 58.284 | P | 0.200 | -0.214 |
| O09A | 2006 | 244 | 10 | 31 | 58.650 | P | 0.200 | 0.000  |
| HEC  | 2006 | 244 | 10 | 31 | 58.860 | P | 0.200 | -0.024 |
| SHO  | 2006 | 244 | 10 | 31 | 59.495 | P | 0.200 | -0.200 |
| U10A | 2006 | 244 | 10 | 32 | 0.017  | P | 0.200 | 0.318  |
| P10A | 2006 | 244 | 10 | 32 | 0.701  | P | 0.200 | -0.316 |
| TUQ  | 2006 | 244 | 10 | 32 | 0.712  | P | 0.200 | -0.183 |
| R10A | 2006 | 244 | 10 | 32 | 1.089  | P | 0.200 | 0.149  |
| V11A | 2006 | 244 | 10 | 32 | 2.894  | P | 0.200 | 0.040  |
| Q11A | 2006 | 244 | 10 | 32 | 3.479  | P | 0.200 | -0.025 |
| U11A | 2006 | 244 | 10 | 32 | 3.598  | P | 0.200 | 0.354  |

|      |      |     |    |         |          |           |          |        |       |
|------|------|-----|----|---------|----------|-----------|----------|--------|-------|
| 2007 | 111  | 7   | 12 | 48.3346 | -3.54800 | 151.26601 | 407.4000 | 325    | 0.012 |
| K01A | 2007 | 111 | 7  | 24      | 54.660   | P         | 0.200    | 0.306  |       |
| JCC  | 2007 | 111 | 7  | 24      | 55.256   | P         | 0.200    | 0.276  |       |
| M01C | 2007 | 111 | 7  | 24      | 55.452   | P         | 0.200    | 0.420  |       |
| O01C | 2007 | 111 | 7  | 24      | 55.813   | P         | 0.200    | 0.437  |       |
| P01C | 2007 | 111 | 7  | 24      | 56.713   | P         | 0.200    | -0.132 |       |
| L02A | 2007 | 111 | 7  | 24      | 57.397   | P         | 0.200    | 0.199  |       |
| HOPS | 2007 | 111 | 7  | 24      | 57.500   | P         | 0.200    | -0.120 |       |
| N02C | 2007 | 111 | 7  | 24      | 57.748   | P         | 0.200    | 0.191  |       |
| J02A | 2007 | 111 | 7  | 24      | 57.818   | P         | 0.200    | 0.079  |       |
| K02A | 2007 | 111 | 7  | 24      | 57.870   | P         | 0.200    | 0.063  |       |
| DBO  | 2007 | 111 | 7  | 24      | 58.817   | P         | 0.200    | -0.060 |       |
| I03A | 2007 | 111 | 7  | 24      | 58.947   | P         | 0.200    | -0.064 |       |
| CVS  | 2007 | 111 | 7  | 24      | 59.141   | P         | 0.200    | -0.499 |       |
| O02C | 2007 | 111 | 7  | 24      | 59.732   | P         | 0.200    | 0.515  |       |
| HUMO | 2007 | 111 | 7  | 24      | 59.759   | P         | 0.200    | 0.157  |       |
| BRK  | 2007 | 111 | 7  | 24      | 59.817   | P         | 0.200    | -0.290 |       |
| M02C | 2007 | 111 | 7  | 24      | 59.879   | P         | 0.200    | 0.439  |       |
| BNLO | 2007 | 111 | 7  | 24      | 59.944   | P         | 0.200    | -0.220 |       |
| GASB | 2007 | 111 | 7  | 24      | 59.964   | P         | 0.200    | 0.662  |       |
| J03A | 2007 | 111 | 7  | 25      | 0.021    | P         | 0.200    | 0.314  |       |
| BKS  | 2007 | 111 | 7  | 25      | 0.061    | P         | 0.200    | -0.150 |       |
| WDC  | 2007 | 111 | 7  | 25      | 0.223    | P         | 0.200    | 0.095  |       |
| YBH  | 2007 | 111 | 7  | 25      | 0.322    | P         | 0.200    | 0.214  |       |
| BRIB | 2007 | 111 | 7  | 25      | 0.434    | P         | 0.200    | 0.037  |       |
| I04A | 2007 | 111 | 7  | 25      | 1.402    | P         | 0.200    | -0.482 |       |
| O03C | 2007 | 111 | 7  | 25      | 1.481    | P         | 0.200    | -0.135 |       |
| SUTB | 2007 | 111 | 7  | 25      | 1.810    | P         | 0.200    | -0.566 |       |
| M03C | 2007 | 111 | 7  | 25      | 1.818    | P         | 0.200    | -0.217 |       |
| WENL | 2007 | 111 | 7  | 25      | 1.910    | P         | 0.200    | 0.077  |       |
| Q03C | 2007 | 111 | 7  | 25      | 1.912    | P         | 0.200    | 0.740  |       |
| MHC  | 2007 | 111 | 7  | 25      | 2.375    | P         | 0.200    | -0.031 |       |
| HAST | 2007 | 111 | 7  | 25      | 2.411    | P         | 0.200    | 0.225  |       |
| SAO  | 2007 | 111 | 7  | 25      | 2.733    | P         | 0.200    | -0.029 |       |
| J04A | 2007 | 111 | 7  | 25      | 2.789    | P         | 0.200    | -0.121 |       |
| SNG5 | 2007 | 111 | 7  | 25      | 2.914    | P         | 0.200    | -0.475 |       |
| ORV  | 2007 | 111 | 7  | 25      | 3.049    | P         | 0.200    | -0.433 |       |
| L04A | 2007 | 111 | 7  | 25      | 3.064    | P         | 0.200    | -0.066 |       |
| M04C | 2007 | 111 | 7  | 25      | 3.141    | P         | 0.200    | 0.027  |       |
| Q04C | 2007 | 111 | 7  | 25      | 3.333    | P         | 0.200    | -0.202 |       |
| S04C | 2007 | 111 | 7  | 25      | 3.437    | P         | 0.200    | 0.000  |       |
| PACP | 2007 | 111 | 7  | 25      | 3.711    | P         | 0.200    | 0.203  |       |
| K04A | 2007 | 111 | 7  | 25      | 3.725    | P         | 0.200    | -0.113 |       |
| SNE4 | 2007 | 111 | 7  | 25      | 3.732    | P         | 0.200    | -0.066 |       |
| V03C | 2007 | 111 | 7  | 25      | 3.855    | P         | 0.200    | 0.639  |       |
| HATC | 2007 | 111 | 7  | 25      | 4.143    | P         | 0.200    | -0.032 |       |
| SNC3 | 2007 | 111 | 7  | 25      | 4.284    | P         | 0.200    | 0.138  |       |

|      |      |     |   |    |       |   |       |        |
|------|------|-----|---|----|-------|---|-------|--------|
| SND4 | 2007 | 111 | 7 | 25 | 4.395 | P | 0.200 | -0.110 |
| R04C | 2007 | 111 | 7 | 25 | 4.470 | P | 0.200 | -0.551 |
| SNE5 | 2007 | 111 | 7 | 25 | 4.540 | P | 0.200 | -0.195 |
| SNG7 | 2007 | 111 | 7 | 25 | 4.756 | P | 0.200 | -0.274 |
| SNF6 | 2007 | 111 | 7 | 25 | 4.896 | P | 0.200 | -0.260 |
| V04C | 2007 | 111 | 7 | 25 | 4.941 | P | 0.200 | 0.463  |
| SNB3 | 2007 | 111 | 7 | 25 | 4.974 | P | 0.200 | -0.060 |
| SNC4 | 2007 | 111 | 7 | 25 | 5.018 | P | 0.200 | -0.217 |
| SND5 | 2007 | 111 | 7 | 25 | 5.100 | P | 0.200 | -0.328 |
| M05C | 2007 | 111 | 7 | 25 | 5.229 | P | 0.200 | -0.277 |
| O04C | 2007 | 111 | 7 | 25 | 5.282 | P | 0.200 | -0.053 |
| O05C | 2007 | 111 | 7 | 25 | 5.504 | P | 0.200 | -0.111 |
| SNE6 | 2007 | 111 | 7 | 25 | 5.598 | P | 0.200 | -0.385 |
| U04C | 2007 | 111 | 7 | 25 | 5.655 | P | 0.200 | 0.519  |
| SNC5 | 2007 | 111 | 7 | 25 | 5.681 | P | 0.200 | -0.364 |
| LAVA | 2007 | 111 | 7 | 25 | 5.742 | P | 0.200 | -0.217 |
| PHL  | 2007 | 111 | 7 | 25 | 5.832 | P | 0.200 | 0.211  |
| J05A | 2007 | 111 | 7 | 25 | 5.835 | P | 0.200 | 0.065  |
| PKD  | 2007 | 111 | 7 | 25 | 5.967 | P | 0.200 | 0.173  |
| T05C | 2007 | 111 | 7 | 25 | 6.081 | P | 0.200 | 0.436  |
| SNA3 | 2007 | 111 | 7 | 25 | 6.081 | P | 0.200 | 0.194  |
| SNE7 | 2007 | 111 | 7 | 25 | 6.323 | P | 0.200 | -0.153 |
| SN93 | 2007 | 111 | 7 | 25 | 6.535 | P | 0.200 | 0.307  |
| SNA4 | 2007 | 111 | 7 | 25 | 6.547 | P | 0.200 | -0.085 |
| S05C | 2007 | 111 | 7 | 25 | 6.585 | P | 0.200 | -0.447 |
| SNF8 | 2007 | 111 | 7 | 25 | 6.644 | P | 0.200 | -0.345 |
| CMB  | 2007 | 111 | 7 | 25 | 6.738 | P | 0.200 | -0.242 |
| SND7 | 2007 | 111 | 7 | 25 | 6.803 | P | 0.200 | -0.126 |
| ELFS | 2007 | 111 | 7 | 25 | 6.834 | P | 0.200 | 0.178  |
| P05C | 2007 | 111 | 7 | 25 | 6.889 | P | 0.200 | 0.116  |
| L05A | 2007 | 111 | 7 | 25 | 6.980 | P | 0.200 | 0.115  |
| K05A | 2007 | 111 | 7 | 25 | 6.998 | P | 0.200 | 0.205  |
| SNC6 | 2007 | 111 | 7 | 25 | 7.228 | P | 0.200 | -0.042 |
| SNF9 | 2007 | 111 | 7 | 25 | 7.305 | P | 0.200 | -0.339 |
| SN95 | 2007 | 111 | 7 | 25 | 7.412 | P | 0.200 | -0.362 |
| SNA5 | 2007 | 111 | 7 | 25 | 7.443 | P | 0.200 | -0.209 |
| SN84 | 2007 | 111 | 7 | 25 | 7.543 | P | 0.200 | -0.581 |
| BEK  | 2007 | 111 | 7 | 25 | 7.546 | P | 0.200 | -0.302 |
| SNC7 | 2007 | 111 | 7 | 25 | 7.674 | P | 0.200 | 0.081  |
| SNB6 | 2007 | 111 | 7 | 25 | 7.831 | P | 0.200 | -0.105 |
| M06C | 2007 | 111 | 7 | 25 | 7.839 | P | 0.200 | 0.086  |
| U05C | 2007 | 111 | 7 | 25 | 8.001 | P | 0.200 | 0.539  |
| SND8 | 2007 | 111 | 7 | 25 | 8.154 | P | 0.200 | 0.013  |
| SMM  | 2007 | 111 | 7 | 25 | 8.216 | P | 0.200 | 0.414  |
| SNE9 | 2007 | 111 | 7 | 25 | 8.295 | P | 0.200 | -0.260 |
| SN74 | 2007 | 111 | 7 | 25 | 8.420 | P | 0.200 | -0.387 |
| R05C | 2007 | 111 | 7 | 25 | 8.508 | P | 0.200 | -0.067 |
| SN85 | 2007 | 111 | 7 | 25 | 8.573 | P | 0.200 | -0.306 |
| SN96 | 2007 | 111 | 7 | 25 | 8.662 | P | 0.200 | -0.015 |
| T06C | 2007 | 111 | 7 | 25 | 8.809 | P | 0.200 | -0.430 |
| SN63 | 2007 | 111 | 7 | 25 | 8.850 | P | 0.200 | -0.423 |
| SCZ2 | 2007 | 111 | 7 | 25 | 8.855 | P | 0.200 | 0.124  |
| V05C | 2007 | 111 | 7 | 25 | 8.873 | P | 0.200 | 0.767  |
| MPP  | 2007 | 111 | 7 | 25 | 8.929 | P | 0.200 | 0.407  |
| SNC8 | 2007 | 111 | 7 | 25 | 9.053 | P | 0.200 | 0.043  |
| SND9 | 2007 | 111 | 7 | 25 | 9.115 | P | 0.200 | 0.034  |
| P06A | 2007 | 111 | 7 | 25 | 9.466 | P | 0.200 | 0.156  |
| SNCC | 2007 | 111 | 7 | 25 | 9.525 | P | 0.200 | 0.504  |
| SNA7 | 2007 | 111 | 7 | 25 | 9.591 | P | 0.200 | 0.281  |
| O06A | 2007 | 111 | 7 | 25 | 9.650 | P | 0.200 | -0.075 |
| SN97 | 2007 | 111 | 7 | 25 | 9.704 | P | 0.200 | 0.170  |
| SN75 | 2007 | 111 | 7 | 25 | 9.710 | P | 0.200 | -0.254 |
| SN64 | 2007 | 111 | 7 | 25 | 9.719 | P | 0.200 | -0.257 |

|      |      |     |   |    |        |   |       |        |
|------|------|-----|---|----|--------|---|-------|--------|
| N06A | 2007 | 111 | 7 | 25 | 9.734  | P | 0.200 | -0.125 |
| SN43 | 2007 | 111 | 7 | 25 | 10.089 | P | 0.200 | -0.349 |
| WCN  | 2007 | 111 | 7 | 25 | 10.115 | P | 0.200 | 0.360  |
| SN65 | 2007 | 111 | 7 | 25 | 10.398 | P | 0.200 | -0.237 |
| VES  | 2007 | 111 | 7 | 25 | 10.410 | P | 0.200 | -0.730 |
| SNA8 | 2007 | 111 | 7 | 25 | 10.559 | P | 0.200 | 0.240  |
| SNB9 | 2007 | 111 | 7 | 25 | 10.616 | P | 0.200 | 0.218  |
| LGU  | 2007 | 111 | 7 | 25 | 10.800 | P | 0.200 | -0.155 |
| R06C | 2007 | 111 | 7 | 25 | 10.999 | P | 0.200 | 0.315  |
| SN55 | 2007 | 111 | 7 | 25 | 11.011 | P | 0.200 | -0.180 |
| HELL | 2007 | 111 | 7 | 25 | 11.244 | P | 0.200 | -0.580 |
| SN12 | 2007 | 111 | 7 | 25 | 11.437 | P | 0.200 | -0.414 |
| BAK  | 2007 | 111 | 7 | 25 | 11.463 | P | 0.200 | 0.511  |
| SN34 | 2007 | 111 | 7 | 25 | 11.770 | P | 0.200 | -0.252 |
| ARV  | 2007 | 111 | 7 | 25 | 12.088 | P | 0.200 | 0.064  |
| L07A | 2007 | 111 | 7 | 25 | 12.165 | P | 0.200 | 0.236  |
| R07C | 2007 | 111 | 7 | 25 | 12.295 | P | 0.200 | 0.105  |
| M07A | 2007 | 111 | 7 | 25 | 12.341 | P | 0.200 | 0.025  |
| OSI  | 2007 | 111 | 7 | 25 | 12.818 | P | 0.200 | 0.327  |
| SN14 | 2007 | 111 | 7 | 25 | 12.863 | P | 0.200 | -0.184 |
| N07B | 2007 | 111 | 7 | 25 | 12.891 | P | 0.200 | 0.073  |
| ISA  | 2007 | 111 | 7 | 25 | 13.089 | P | 0.200 | -0.445 |
| DJJ  | 2007 | 111 | 7 | 25 | 13.117 | P | 0.200 | -0.055 |
| P07A | 2007 | 111 | 7 | 25 | 13.145 | P | 0.200 | 0.217  |
| CIA  | 2007 | 111 | 7 | 25 | 13.268 | P | 0.200 | -0.063 |
| RPV  | 2007 | 111 | 7 | 25 | 13.530 | P | 0.200 | 0.106  |
| DEC  | 2007 | 111 | 7 | 25 | 13.558 | P | 0.200 | -0.203 |
| FMP  | 2007 | 111 | 7 | 25 | 13.843 | P | 0.200 | 0.125  |
| PASC | 2007 | 111 | 7 | 25 | 14.153 | P | 0.200 | -0.167 |
| USC  | 2007 | 111 | 7 | 25 | 14.388 | P | 0.200 | 0.629  |
| VCS  | 2007 | 111 | 7 | 25 | 14.823 | P | 0.200 | 0.182  |
| TIN  | 2007 | 111 | 7 | 25 | 14.830 | P | 0.200 | -0.009 |
| MWC  | 2007 | 111 | 7 | 25 | 14.944 | P | 0.200 | -0.120 |
| CHF  | 2007 | 111 | 7 | 25 | 15.039 | P | 0.200 | -0.095 |
| CWC  | 2007 | 111 | 7 | 25 | 15.057 | P | 0.200 | -0.303 |
| EDW2 | 2007 | 111 | 7 | 25 | 15.369 | P | 0.200 | 0.196  |
| R08A | 2007 | 111 | 7 | 25 | 15.382 | P | 0.200 | -0.031 |
| S08C | 2007 | 111 | 7 | 25 | 15.484 | P | 0.200 | 0.118  |
| O08A | 2007 | 111 | 7 | 25 | 15.877 | P | 0.200 | 0.179  |
| N08A | 2007 | 111 | 7 | 25 | 15.891 | P | 0.200 | 0.162  |
| Q08A | 2007 | 111 | 7 | 25 | 16.151 | P | 0.200 | -0.064 |
| P08A | 2007 | 111 | 7 | 25 | 16.179 | P | 0.200 | 0.378  |
| BFS  | 2007 | 111 | 7 | 25 | 16.257 | P | 0.200 | -0.137 |
| SDD  | 2007 | 111 | 7 | 25 | 16.617 | P | 0.200 | 0.538  |
| LRL  | 2007 | 111 | 7 | 25 | 16.647 | P | 0.200 | 0.109  |
| ADO  | 2007 | 111 | 7 | 25 | 17.359 | P | 0.200 | 0.026  |
| VTV  | 2007 | 111 | 7 | 25 | 17.402 | P | 0.200 | -0.196 |
| MPM  | 2007 | 111 | 7 | 25 | 17.414 | P | 0.200 | 0.021  |
| GRA  | 2007 | 111 | 7 | 25 | 17.769 | P | 0.200 | -0.070 |
| SVD  | 2007 | 111 | 7 | 25 | 18.398 | P | 0.200 | -0.108 |
| S09A | 2007 | 111 | 7 | 25 | 18.494 | P | 0.200 | -0.139 |
| RRX  | 2007 | 111 | 7 | 25 | 18.899 | P | 0.200 | 0.073  |
| P09A | 2007 | 111 | 7 | 25 | 18.959 | P | 0.200 | -0.114 |
| Q09A | 2007 | 111 | 7 | 25 | 19.010 | P | 0.200 | 0.152  |
| BBR  | 2007 | 111 | 7 | 25 | 19.040 | P | 0.200 | -0.379 |
| R09A | 2007 | 111 | 7 | 25 | 19.067 | P | 0.200 | -0.200 |
| O09A | 2007 | 111 | 7 | 25 | 19.318 | P | 0.200 | 0.362  |
| FUR  | 2007 | 111 | 7 | 25 | 19.525 | P | 0.200 | 0.062  |
| GSC  | 2007 | 111 | 7 | 25 | 19.723 | P | 0.200 | -0.026 |
| S10A | 2007 | 111 | 7 | 25 | 20.983 | P | 0.200 | 0.031  |
| HEC  | 2007 | 111 | 7 | 25 | 21.260 | P | 0.200 | -0.115 |
| SHO  | 2007 | 111 | 7 | 25 | 21.407 | P | 0.200 | -0.325 |
| Q10A | 2007 | 111 | 7 | 25 | 21.876 | P | 0.200 | 0.159  |

|      |      |     |   |    |        |   |       |        |
|------|------|-----|---|----|--------|---|-------|--------|
| TPNV | 2007 | 111 | 7 | 25 | 21.917 | P | 0.200 | -0.147 |
| U10A | 2007 | 111 | 7 | 25 | 21.918 | P | 0.200 | 0.413  |
| R10A | 2007 | 111 | 7 | 25 | 22.418 | P | 0.200 | 0.409  |
| TUQ  | 2007 | 111 | 7 | 25 | 22.901 | P | 0.200 | -0.198 |
| S11A | 2007 | 111 | 7 | 25 | 23.940 | P | 0.200 | 0.066  |
| R11A | 2007 | 111 | 7 | 25 | 24.567 | P | 0.200 | 0.076  |
| V11A | 2007 | 111 | 7 | 25 | 24.849 | P | 0.200 | -0.045 |
| U11A | 2007 | 111 | 7 | 25 | 25.312 | P | 0.200 | 0.309  |
| T11A | 2007 | 111 | 7 | 25 | 25.752 | P | 0.200 | 0.058  |

|      |    |   |    |         |          |           |         |     |       |
|------|----|---|----|---------|----------|-----------|---------|-----|-------|
| 2007 | 94 | 0 | 39 | 44.7728 | -7.14100 | 156.04700 | 10.0000 | 320 | 0.009 |
|------|----|---|----|---------|----------|-----------|---------|-----|-------|

|      |      |    |   |    |        |   |       |        |
|------|------|----|---|----|--------|---|-------|--------|
| JCC  | 2007 | 94 | 0 | 52 | 30.956 | P | 0.200 | 0.220  |
| FARB | 2007 | 94 | 0 | 52 | 31.197 | P | 0.200 | -0.283 |
| O01C | 2007 | 94 | 0 | 52 | 31.336 | P | 0.200 | 0.521  |
| M01C | 2007 | 94 | 0 | 52 | 31.766 | P | 0.200 | 0.466  |
| P01C | 2007 | 94 | 0 | 52 | 32.132 | P | 0.200 | 0.149  |
| N02C | 2007 | 94 | 0 | 52 | 33.686 | P | 0.200 | 0.317  |
| CVS  | 2007 | 94 | 0 | 52 | 33.946 | P | 0.200 | -0.330 |
| L02A | 2007 | 94 | 0 | 52 | 33.983 | P | 0.200 | 0.333  |
| BNLO | 2007 | 94 | 0 | 52 | 34.222 | P | 0.200 | 0.002  |
| BRK  | 2007 | 94 | 0 | 52 | 34.300 | P | 0.200 | -0.193 |
| JRSC | 2007 | 94 | 0 | 52 | 34.318 | P | 0.200 | 0.182  |
| BKS  | 2007 | 94 | 0 | 52 | 34.596 | P | 0.200 | -0.044 |
| K02A | 2007 | 94 | 0 | 52 | 34.658 | P | 0.200 | 0.112  |
| J02A | 2007 | 94 | 0 | 52 | 34.998 | P | 0.200 | 0.234  |
| BRIB | 2007 | 94 | 0 | 52 | 35.042 | P | 0.200 | 0.210  |
| MNRC | 2007 | 94 | 0 | 52 | 35.081 | P | 0.200 | 0.285  |
| O02C | 2007 | 94 | 0 | 52 | 35.167 | P | 0.200 | 0.445  |
| GASB | 2007 | 94 | 0 | 52 | 35.397 | P | 0.200 | 0.858  |
| M02C | 2007 | 94 | 0 | 52 | 35.854 | P | 0.200 | 0.325  |
| DBO  | 2007 | 94 | 0 | 52 | 35.879 | P | 0.200 | 0.086  |
| WDC  | 2007 | 94 | 0 | 52 | 35.909 | P | 0.200 | 0.063  |
| BDM  | 2007 | 94 | 0 | 52 | 36.273 | P | 0.200 | 0.330  |
| HAST | 2007 | 94 | 0 | 52 | 36.304 | P | 0.200 | 0.414  |
| WENL | 2007 | 94 | 0 | 52 | 36.337 | P | 0.200 | 0.217  |
| I03A | 2007 | 94 | 0 | 52 | 36.376 | P | 0.200 | 0.021  |
| HUMO | 2007 | 94 | 0 | 52 | 36.474 | P | 0.200 | 0.187  |
| YBH  | 2007 | 94 | 0 | 52 | 36.614 | P | 0.200 | 0.253  |
| MHC  | 2007 | 94 | 0 | 52 | 36.720 | P | 0.200 | 0.136  |
| SAO  | 2007 | 94 | 0 | 52 | 36.808 | P | 0.200 | 0.129  |
| SUTB | 2007 | 94 | 0 | 52 | 36.856 | P | 0.200 | -0.602 |
| O03C | 2007 | 94 | 0 | 52 | 36.993 | P | 0.200 | -0.035 |
| J03A | 2007 | 94 | 0 | 52 | 37.008 | P | 0.200 | 0.270  |
| M03C | 2007 | 94 | 0 | 52 | 37.744 | P | 0.200 | -0.343 |
| PACP | 2007 | 94 | 0 | 52 | 37.806 | P | 0.200 | 0.274  |
| S04C | 2007 | 94 | 0 | 52 | 37.817 | P | 0.200 | 0.139  |
| V04C | 2007 | 94 | 0 | 52 | 38.346 | P | 0.200 | 0.472  |
| SNG5 | 2007 | 94 | 0 | 52 | 38.348 | P | 0.200 | -0.347 |
| Q04C | 2007 | 94 | 0 | 52 | 38.398 | P | 0.200 | -0.015 |
| ORV  | 2007 | 94 | 0 | 52 | 38.405 | P | 0.200 | -0.282 |
| I04A | 2007 | 94 | 0 | 52 | 38.594 | P | 0.200 | -0.538 |
| SNE4 | 2007 | 94 | 0 | 52 | 38.937 | P | 0.200 | 0.048  |
| R04C | 2007 | 94 | 0 | 52 | 39.165 | P | 0.200 | -0.467 |
| SNC3 | 2007 | 94 | 0 | 52 | 39.187 | P | 0.200 | 0.215  |
| PHL  | 2007 | 94 | 0 | 52 | 39.339 | P | 0.200 | 0.420  |
| L04A | 2007 | 94 | 0 | 52 | 39.375 | P | 0.200 | -0.237 |
| M04C | 2007 | 94 | 0 | 52 | 39.413 | P | 0.200 | 0.022  |
| U04C | 2007 | 94 | 0 | 52 | 39.506 | P | 0.200 | 0.654  |
| SND4 | 2007 | 94 | 0 | 52 | 39.507 | P | 0.200 | 0.015  |
| J04A | 2007 | 94 | 0 | 52 | 39.513 | P | 0.200 | -0.375 |
| SNB3 | 2007 | 94 | 0 | 52 | 39.613 | P | 0.200 | -0.193 |
| PKD  | 2007 | 94 | 0 | 52 | 39.627 | P | 0.200 | 0.320  |
| SNE5 | 2007 | 94 | 0 | 52 | 39.818 | P | 0.200 | -0.063 |

|      |      |    |   |    |        |   |       |        |
|------|------|----|---|----|--------|---|-------|--------|
| SNC4 | 2007 | 94 | 0 | 52 | 39.943 | P | 0.200 | -0.175 |
| HATC | 2007 | 94 | 0 | 52 | 39.953 | P | 0.200 | -0.062 |
| T05C | 2007 | 94 | 0 | 52 | 40.186 | P | 0.200 | 0.560  |
| SND5 | 2007 | 94 | 0 | 52 | 40.191 | P | 0.200 | -0.276 |
| SNF6 | 2007 | 94 | 0 | 52 | 40.217 | P | 0.200 | -0.244 |
| SNG7 | 2007 | 94 | 0 | 52 | 40.231 | P | 0.200 | -0.270 |
| K04A | 2007 | 94 | 0 | 52 | 40.247 | P | 0.200 | -0.292 |
| LAVA | 2007 | 94 | 0 | 52 | 40.676 | P | 0.200 | -0.114 |
| SNA3 | 2007 | 94 | 0 | 52 | 40.789 | P | 0.200 | 0.231  |
| SNC5 | 2007 | 94 | 0 | 52 | 40.794 | P | 0.200 | -0.234 |
| O04C | 2007 | 94 | 0 | 52 | 40.857 | P | 0.200 | -0.052 |
| SNE6 | 2007 | 94 | 0 | 52 | 40.875 | P | 0.200 | -0.306 |
| S05C | 2007 | 94 | 0 | 52 | 40.908 | P | 0.200 | -0.323 |
| O05C | 2007 | 94 | 0 | 52 | 41.010 | P | 0.200 | -0.017 |
| SN93 | 2007 | 94 | 0 | 52 | 41.135 | P | 0.200 | 0.347  |
| M05C | 2007 | 94 | 0 | 52 | 41.201 | P | 0.200 | -0.383 |
| SCZ2 | 2007 | 94 | 0 | 52 | 41.326 | P | 0.200 | -0.044 |
| SNA4 | 2007 | 94 | 0 | 52 | 41.363 | P | 0.200 | 0.005  |
| CMB  | 2007 | 94 | 0 | 52 | 41.435 | P | 0.200 | -0.060 |
| SMM  | 2007 | 94 | 0 | 52 | 41.442 | P | 0.200 | 0.382  |
| SNE7 | 2007 | 94 | 0 | 52 | 41.806 | P | 0.200 | -0.028 |
| U05C | 2007 | 94 | 0 | 52 | 41.902 | P | 0.200 | 0.714  |
| MPP  | 2007 | 94 | 0 | 52 | 42.010 | P | 0.200 | 0.437  |
| P05C | 2007 | 94 | 0 | 52 | 42.034 | P | 0.200 | 0.163  |
| SNF8 | 2007 | 94 | 0 | 52 | 42.076 | P | 0.200 | -0.375 |
| SND7 | 2007 | 94 | 0 | 52 | 42.151 | P | 0.200 | -0.032 |
| SN95 | 2007 | 94 | 0 | 52 | 42.202 | P | 0.200 | -0.245 |
| SN84 | 2007 | 94 | 0 | 52 | 42.250 | P | 0.200 | -0.447 |
| SNA5 | 2007 | 94 | 0 | 52 | 42.278 | P | 0.200 | -0.158 |
| SNC6 | 2007 | 94 | 0 | 52 | 42.323 | P | 0.200 | 0.061  |
| J05A | 2007 | 94 | 0 | 52 | 42.529 | P | 0.200 | -0.257 |
| SNF9 | 2007 | 94 | 0 | 52 | 42.819 | P | 0.200 | -0.350 |
| SNC7 | 2007 | 94 | 0 | 52 | 42.827 | P | 0.200 | 0.135  |
| BEK  | 2007 | 94 | 0 | 52 | 42.911 | P | 0.200 | -0.304 |
| L05A | 2007 | 94 | 0 | 52 | 43.032 | P | 0.200 | -0.261 |
| SN74 | 2007 | 94 | 0 | 52 | 43.050 | P | 0.200 | -0.232 |
| T06C | 2007 | 94 | 0 | 52 | 43.082 | P | 0.200 | -0.207 |
| K05A | 2007 | 94 | 0 | 52 | 43.325 | P | 0.200 | -0.219 |
| SN85 | 2007 | 94 | 0 | 52 | 43.345 | P | 0.200 | -0.164 |
| SN63 | 2007 | 94 | 0 | 52 | 43.358 | P | 0.200 | -0.284 |
| SND8 | 2007 | 94 | 0 | 52 | 43.368 | P | 0.200 | -0.035 |
| SN96 | 2007 | 94 | 0 | 52 | 43.421 | P | 0.200 | 0.015  |
| LGU  | 2007 | 94 | 0 | 52 | 43.436 | P | 0.200 | -0.234 |
| SNB7 | 2007 | 94 | 0 | 52 | 43.457 | P | 0.200 | 0.050  |
| R05C | 2007 | 94 | 0 | 52 | 43.524 | P | 0.200 | 0.113  |
| M06C | 2007 | 94 | 0 | 52 | 43.690 | P | 0.200 | -0.068 |
| SNE9 | 2007 | 94 | 0 | 52 | 43.837 | P | 0.200 | -0.190 |
| RCT  | 2007 | 94 | 0 | 52 | 43.988 | P | 0.200 | -0.427 |
| VES  | 2007 | 94 | 0 | 52 | 44.048 | P | 0.200 | -0.592 |
| SN64 | 2007 | 94 | 0 | 52 | 44.345 | P | 0.200 | -0.064 |
| SN75 | 2007 | 94 | 0 | 52 | 44.358 | P | 0.200 | -0.184 |
| SN97 | 2007 | 94 | 0 | 52 | 44.423 | P | 0.200 | -0.008 |
| SND9 | 2007 | 94 | 0 | 52 | 44.463 | P | 0.200 | 0.011  |
| SNA7 | 2007 | 94 | 0 | 52 | 44.553 | P | 0.200 | 0.244  |
| SN43 | 2007 | 94 | 0 | 52 | 44.605 | P | 0.200 | -0.056 |
| P06A | 2007 | 94 | 0 | 52 | 44.745 | P | 0.200 | 0.117  |
| SN65 | 2007 | 94 | 0 | 52 | 45.040 | P | 0.200 | -0.125 |
| O06A | 2007 | 94 | 0 | 52 | 45.060 | P | 0.200 | -0.199 |
| WCN  | 2007 | 94 | 0 | 52 | 45.218 | P | 0.200 | 0.349  |
| ARV  | 2007 | 94 | 0 | 52 | 45.349 | P | 0.200 | 0.147  |
| CIA  | 2007 | 94 | 0 | 52 | 45.393 | P | 0.200 | -0.355 |
| HELL | 2007 | 94 | 0 | 52 | 45.424 | P | 0.200 | -0.306 |
| N06A | 2007 | 94 | 0 | 52 | 45.471 | P | 0.200 | -0.188 |



|      |      |    |   |    |        |   |       |        |
|------|------|----|---|----|--------|---|-------|--------|
| SNA8 | 2007 | 94 | 0 | 52 | 45.615 | P | 0.200 | 0.283  |
| SN55 | 2007 | 94 | 0 | 52 | 45.648 | P | 0.200 | -0.020 |
| SN12 | 2007 | 94 | 0 | 52 | 45.725 | P | 0.200 | -0.138 |
| DJJ  | 2007 | 94 | 0 | 52 | 45.765 | P | 0.200 | -0.132 |
| OSI  | 2007 | 94 | 0 | 52 | 45.795 | P | 0.200 | 0.331  |
| R06C | 2007 | 94 | 0 | 52 | 45.837 | P | 0.200 | 0.403  |
| SN98 | 2007 | 94 | 0 | 52 | 45.847 | P | 0.200 | 0.047  |
| SNB9 | 2007 | 94 | 0 | 52 | 45.847 | P | 0.200 | 0.286  |
| RPV  | 2007 | 94 | 0 | 52 | 45.862 | P | 0.200 | -0.132 |
| SN34 | 2007 | 94 | 0 | 52 | 46.181 | P | 0.200 | -0.067 |
| FMP  | 2007 | 94 | 0 | 52 | 46.314 | P | 0.200 | 0.029  |
| DEC  | 2007 | 94 | 0 | 52 | 46.327 | P | 0.200 | -0.212 |
| R07C | 2007 | 94 | 0 | 52 | 46.883 | P | 0.200 | 0.152  |
| ISA  | 2007 | 94 | 0 | 52 | 46.955 | P | 0.200 | -0.013 |
| SN14 | 2007 | 94 | 0 | 52 | 47.160 | P | 0.200 | -0.002 |
| MLAC | 2007 | 94 | 0 | 52 | 47.476 | P | 0.200 | 0.311  |
| MWC  | 2007 | 94 | 0 | 52 | 47.554 | P | 0.200 | -0.286 |
| VCS  | 2007 | 94 | 0 | 52 | 47.601 | P | 0.200 | 0.076  |
| CHF  | 2007 | 94 | 0 | 52 | 47.750 | P | 0.200 | -0.197 |
| Q07A | 2007 | 94 | 0 | 52 | 48.038 | P | 0.200 | 0.076  |
| M07A | 2007 | 94 | 0 | 52 | 48.183 | P | 0.200 | -0.239 |
| L07A | 2007 | 94 | 0 | 52 | 48.356 | P | 0.200 | 0.044  |
| P07A | 2007 | 94 | 0 | 52 | 48.366 | P | 0.200 | 0.220  |
| EDW2 | 2007 | 94 | 0 | 52 | 48.482 | P | 0.200 | 0.226  |
| N07B | 2007 | 94 | 0 | 52 | 48.496 | P | 0.200 | -0.119 |
| BFS  | 2007 | 94 | 0 | 52 | 48.933 | P | 0.200 | -0.263 |
| TIN  | 2007 | 94 | 0 | 52 | 48.995 | P | 0.200 | 0.087  |
| CWC  | 2007 | 94 | 0 | 52 | 49.089 | P | 0.200 | -0.080 |
| S08C | 2007 | 94 | 0 | 52 | 49.957 | P | 0.200 | 0.316  |
| R08A | 2007 | 94 | 0 | 52 | 50.052 | P | 0.200 | -0.060 |
| LRL  | 2007 | 94 | 0 | 52 | 50.142 | P | 0.200 | 0.239  |
| ADO  | 2007 | 94 | 0 | 52 | 50.232 | P | 0.200 | -0.062 |
| VTV  | 2007 | 94 | 0 | 52 | 50.333 | P | 0.200 | -0.230 |
| Q08A | 2007 | 94 | 0 | 52 | 51.012 | P | 0.200 | -0.122 |
| P08A | 2007 | 94 | 0 | 52 | 51.129 | P | 0.200 | 0.000  |
| MPM  | 2007 | 94 | 0 | 52 | 51.129 | P | 0.200 | 0.099  |
| SVD  | 2007 | 94 | 0 | 52 | 51.326 | P | 0.200 | 0.057  |
| O08A | 2007 | 94 | 0 | 52 | 51.356 | P | 0.200 | 0.066  |
| N08A | 2007 | 94 | 0 | 52 | 51.502 | P | 0.200 | -0.042 |
| RRX  | 2007 | 94 | 0 | 52 | 51.932 | P | 0.200 | -0.020 |
| GRA  | 2007 | 94 | 0 | 52 | 52.020 | P | 0.200 | 0.085  |
| S09A | 2007 | 94 | 0 | 52 | 52.886 | P | 0.200 | -0.162 |
| GSC  | 2007 | 94 | 0 | 52 | 53.156 | P | 0.200 | 0.081  |
| FUR  | 2007 | 94 | 0 | 52 | 53.342 | P | 0.200 | 0.035  |
| R09A | 2007 | 94 | 0 | 52 | 53.702 | P | 0.200 | -0.238 |
| Q09A | 2007 | 94 | 0 | 52 | 53.870 | P | 0.200 | 0.079  |
| P09A | 2007 | 94 | 0 | 52 | 54.154 | P | 0.200 | -0.171 |
| HEC  | 2007 | 94 | 0 | 52 | 54.341 | P | 0.200 | -0.134 |
| O09A | 2007 | 94 | 0 | 52 | 54.551 | P | 0.200 | 0.045  |
| SHO  | 2007 | 94 | 0 | 52 | 54.930 | P | 0.200 | -0.409 |
| S10A | 2007 | 94 | 0 | 52 | 55.431 | P | 0.200 | -0.051 |
| U10A | 2007 | 94 | 0 | 52 | 55.728 | P | 0.200 | 0.358  |
| TPNV | 2007 | 94 | 0 | 52 | 56.024 | P | 0.200 | -0.114 |
| TUQ  | 2007 | 94 | 0 | 52 | 56.273 | P | 0.200 | -0.242 |
| P10A | 2007 | 94 | 0 | 52 | 56.624 | P | 0.200 | -0.223 |
| Q10A | 2007 | 94 | 0 | 52 | 56.748 | P | 0.200 | 0.102  |
| R10A | 2007 | 94 | 0 | 52 | 56.993 | P | 0.200 | 0.290  |
| S11A | 2007 | 94 | 0 | 52 | 58.135 | P | 0.200 | -0.145 |
| V11A | 2007 | 94 | 0 | 52 | 58.424 | P | 0.200 | -0.065 |
| U11A | 2007 | 94 | 0 | 52 | 59.157 | P | 0.200 | 0.253  |
| R11A | 2007 | 94 | 0 | 52 | 59.243 | P | 0.200 | -0.015 |
| Q11A | 2007 | 94 | 0 | 52 | 59.261 | P | 0.200 | -0.026 |
| T11A | 2007 | 94 | 0 | 53 | 0.081  | P | 0.200 | 0.125  |

|      |      |     |    |         |           |           |         |        |       |
|------|------|-----|----|---------|-----------|-----------|---------|--------|-------|
| 2007 | 224  | 12  | 5  | 20.2649 | -11.37800 | 166.27299 | 42.0000 | 345    | 0.001 |
| FARB | 2007 | 224 | 12 | 17      | 36.315    | P         | 0.200   | -0.192 |       |
| MCCM | 2007 | 224 | 12 | 17      | 37.462    | P         | 0.200   | -0.355 |       |
| O01C | 2007 | 224 | 12 | 17      | 38.660    | P         | 0.200   | 0.605  |       |
| P01C | 2007 | 224 | 12 | 17      | 38.767    | P         | 0.200   | 0.141  |       |
| BNLO | 2007 | 224 | 12 | 17      | 38.781    | P         | 0.200   | -0.058 |       |
| JRSC | 2007 | 224 | 12 | 17      | 38.919    | P         | 0.200   | -0.051 |       |
| JCC  | 2007 | 224 | 12 | 17      | 39.003    | P         | 0.200   | 0.408  |       |
| CVS  | 2007 | 224 | 12 | 17      | 39.639    | P         | 0.200   | -0.336 |       |
| BRK  | 2007 | 224 | 12 | 17      | 39.684    | P         | 0.200   | -0.062 |       |
| BKS  | 2007 | 224 | 12 | 17      | 39.986    | P         | 0.200   | 0.044  |       |
| HAST | 2007 | 224 | 12 | 17      | 40.184    | P         | 0.200   | 0.277  |       |
| BRIB | 2007 | 224 | 12 | 17      | 40.234    | P         | 0.200   | 0.053  |       |
| M01C | 2007 | 224 | 12 | 17      | 40.877    | P         | 0.200   | 0.763  |       |
| SAO  | 2007 | 224 | 12 | 17      | 41.049    | P         | 0.200   | -0.049 |       |
| V03C | 2007 | 224 | 12 | 17      | 41.183    | P         | 0.200   | 0.684  |       |
| MNRC | 2007 | 224 | 12 | 17      | 41.271    | P         | 0.200   | 0.313  |       |
| K01A | 2007 | 224 | 12 | 17      | 41.441    | P         | 0.200   | 0.697  |       |
| WENL | 2007 | 224 | 12 | 17      | 41.514    | P         | 0.200   | 0.277  |       |
| MHC  | 2007 | 224 | 12 | 17      | 41.557    | P         | 0.200   | 0.073  |       |
| V04C | 2007 | 224 | 12 | 17      | 41.563    | P         | 0.200   | 0.181  |       |
| BDM  | 2007 | 224 | 12 | 17      | 41.589    | P         | 0.200   | 0.234  |       |
| N02C | 2007 | 224 | 12 | 17      | 41.693    | P         | 0.200   | 0.415  |       |
| GASB | 2007 | 224 | 12 | 17      | 42.276    | P         | 0.200   | 0.890  |       |
| PACP | 2007 | 224 | 12 | 17      | 42.445    | P         | 0.200   | 0.255  |       |
| PHL  | 2007 | 224 | 12 | 17      | 42.509    | P         | 0.200   | 0.223  |       |
| O02C | 2007 | 224 | 12 | 17      | 42.674    | P         | 0.200   | 0.601  |       |
| Q03C | 2007 | 224 | 12 | 17      | 42.788    | P         | 0.200   | 0.835  |       |
| S04C | 2007 | 224 | 12 | 17      | 42.903    | P         | 0.200   | 0.143  |       |
| L02A | 2007 | 224 | 12 | 17      | 43.268    | P         | 0.200   | 0.492  |       |
| SCZ2 | 2007 | 224 | 12 | 17      | 43.315    | P         | 0.200   | -0.294 |       |
| PKD  | 2007 | 224 | 12 | 17      | 43.329    | P         | 0.200   | 0.216  |       |
| SUTB | 2007 | 224 | 12 | 17      | 43.405    | P         | 0.200   | -0.671 |       |
| U04C | 2007 | 224 | 12 | 17      | 43.643    | P         | 0.200   | 0.659  |       |
| WDC  | 2007 | 224 | 12 | 17      | 43.818    | P         | 0.200   | 0.197  |       |
| SBC  | 2007 | 224 | 12 | 17      | 44.166    | P         | 0.200   | 0.155  |       |
| Q04C | 2007 | 224 | 12 | 17      | 44.492    | P         | 0.200   | -0.220 |       |
| TAKO | 2007 | 224 | 12 | 17      | 44.559    | P         | 0.200   | 0.529  |       |
| K02A | 2007 | 224 | 12 | 17      | 44.624    | P         | 0.200   | 0.389  |       |
| SMM  | 2007 | 224 | 12 | 17      | 44.627    | P         | 0.200   | 0.194  |       |
| M02C | 2007 | 224 | 12 | 17      | 44.687    | P         | 0.200   | 0.686  |       |
| MPP  | 2007 | 224 | 12 | 17      | 44.751    | P         | 0.200   | 0.181  |       |
| T05C | 2007 | 224 | 12 | 17      | 44.819    | P         | 0.200   | 0.537  |       |
| R04C | 2007 | 224 | 12 | 17      | 44.987    | P         | 0.200   | -0.462 |       |
| SNC3 | 2007 | 224 | 12 | 17      | 45.230    | P         | 0.200   | 0.042  |       |
| J02A | 2007 | 224 | 12 | 17      | 45.370    | P         | 0.200   | 0.365  |       |
| ORV  | 2007 | 224 | 12 | 17      | 45.385    | P         | 0.200   | -0.214 |       |
| SNE4 | 2007 | 224 | 12 | 17      | 45.446    | P         | 0.200   | -0.137 |       |
| SNG5 | 2007 | 224 | 12 | 17      | 45.475    | P         | 0.200   | -0.317 |       |
| YBH  | 2007 | 224 | 12 | 17      | 45.625    | P         | 0.200   | 0.470  |       |
| SNB3 | 2007 | 224 | 12 | 17      | 45.704    | P         | 0.200   | -0.218 |       |
| LGU  | 2007 | 224 | 12 | 17      | 45.730    | P         | 0.200   | -0.415 |       |
| SND4 | 2007 | 224 | 12 | 17      | 45.856    | P         | 0.200   | -0.152 |       |
| S05C | 2007 | 224 | 12 | 17      | 45.896    | P         | 0.200   | -0.446 |       |
| DBO  | 2007 | 224 | 12 | 17      | 45.992    | P         | 0.200   | 0.154  |       |
| V05C | 2007 | 224 | 12 | 17      | 46.098    | P         | 0.200   | 0.583  |       |
| HUMO | 2007 | 224 | 12 | 17      | 46.279    | P         | 0.200   | 0.394  |       |
| SNC4 | 2007 | 224 | 12 | 17      | 46.298    | P         | 0.200   | -0.169 |       |
| M03C | 2007 | 224 | 12 | 17      | 46.384    | P         | 0.200   | -0.157 |       |
| SNE5 | 2007 | 224 | 12 | 17      | 46.582    | P         | 0.200   | -0.126 |       |
| SNA3 | 2007 | 224 | 12 | 17      | 46.654    | P         | 0.200   | 0.118  |       |
| SND5 | 2007 | 224 | 12 | 17      | 46.809    | P         | 0.200   | -0.318 |       |

|      |      |     |    |    |        |   |       |        |
|------|------|-----|----|----|--------|---|-------|--------|
| SN93 | 2007 | 224 | 12 | 17 | 46.857 | P | 0.200 | 0.313  |
| LAVA | 2007 | 224 | 12 | 17 | 46.872 | P | 0.200 | -0.214 |
| CMB  | 2007 | 224 | 12 | 17 | 47.029 | P | 0.200 | -0.182 |
| SNC5 | 2007 | 224 | 12 | 17 | 47.133 | P | 0.200 | -0.450 |
| CIA  | 2007 | 224 | 12 | 17 | 47.148 | P | 0.200 | -0.607 |
| SNA4 | 2007 | 224 | 12 | 17 | 47.356 | P | 0.200 | -0.106 |
| I03A | 2007 | 224 | 12 | 17 | 47.380 | P | 0.200 | 0.168  |
| SNF6 | 2007 | 224 | 12 | 17 | 47.408 | P | 0.200 | -0.169 |
| SNG7 | 2007 | 224 | 12 | 17 | 47.750 | P | 0.200 | -0.204 |
| SNB5 | 2007 | 224 | 12 | 17 | 47.778 | P | 0.200 | -0.255 |
| T06C | 2007 | 224 | 12 | 17 | 47.855 | P | 0.200 | -0.336 |
| SNE6 | 2007 | 224 | 12 | 17 | 47.908 | P | 0.200 | -0.227 |
| RPV  | 2007 | 224 | 12 | 17 | 47.960 | P | 0.200 | -0.330 |
| HATC | 2007 | 224 | 12 | 17 | 48.035 | P | 0.200 | -0.084 |
| DJJ  | 2007 | 224 | 12 | 17 | 48.063 | P | 0.200 | -0.426 |
| VES  | 2007 | 224 | 12 | 17 | 48.090 | P | 0.200 | -0.496 |
| BAK  | 2007 | 224 | 12 | 17 | 48.129 | P | 0.200 | 0.355  |
| RCT  | 2007 | 224 | 12 | 17 | 48.211 | P | 0.200 | -0.579 |
| OSI  | 2007 | 224 | 12 | 17 | 48.334 | P | 0.200 | -0.111 |
| FMP  | 2007 | 224 | 12 | 17 | 48.353 | P | 0.200 | -0.245 |
| SNA5 | 2007 | 224 | 12 | 17 | 48.421 | P | 0.200 | -0.258 |
| O05C | 2007 | 224 | 12 | 17 | 48.522 | P | 0.200 | 0.119  |
| O04C | 2007 | 224 | 12 | 17 | 48.575 | P | 0.200 | 0.011  |
| M04C | 2007 | 224 | 12 | 17 | 48.593 | P | 0.200 | 0.281  |
| ARV  | 2007 | 224 | 12 | 17 | 48.662 | P | 0.200 | 0.095  |
| P05C | 2007 | 224 | 12 | 17 | 48.736 | P | 0.200 | 0.069  |
| SN63 | 2007 | 224 | 12 | 17 | 48.748 | P | 0.200 | -0.409 |
| S06C | 2007 | 224 | 12 | 17 | 48.749 | P | 0.200 | -0.530 |
| SNC6 | 2007 | 224 | 12 | 17 | 48.799 | P | 0.200 | -0.087 |
| DEC  | 2007 | 224 | 12 | 17 | 48.819 | P | 0.200 | -0.431 |
| L04A | 2007 | 224 | 12 | 17 | 48.859 | P | 0.200 | -0.037 |
| YO01 | 2007 | 224 | 12 | 17 | 48.983 | P | 0.200 | -0.252 |
| SNE7 | 2007 | 224 | 12 | 17 | 49.046 | P | 0.200 | -0.070 |
| YO02 | 2007 | 224 | 12 | 17 | 49.113 | P | 0.200 | -0.367 |
| SNB6 | 2007 | 224 | 12 | 17 | 49.146 | P | 0.200 | -0.152 |
| PASC | 2007 | 224 | 12 | 17 | 49.233 | P | 0.200 | -0.573 |
| YO03 | 2007 | 224 | 12 | 17 | 49.236 | P | 0.200 | -0.309 |
| USC  | 2007 | 224 | 12 | 17 | 49.301 | P | 0.200 | 0.328  |
| SN96 | 2007 | 224 | 12 | 17 | 49.348 | P | 0.200 | -0.215 |
| SND7 | 2007 | 224 | 12 | 17 | 49.394 | P | 0.200 | 0.114  |
| YO04 | 2007 | 224 | 12 | 17 | 49.519 | P | 0.200 | -0.231 |
| I04A | 2007 | 224 | 12 | 17 | 49.628 | P | 0.200 | -0.228 |
| YO05 | 2007 | 224 | 12 | 17 | 49.628 | P | 0.200 | -0.273 |
| SNF8 | 2007 | 224 | 12 | 17 | 49.658 | P | 0.200 | -0.252 |
| R05C | 2007 | 224 | 12 | 17 | 49.700 | P | 0.200 | -0.071 |
| SNC7 | 2007 | 224 | 12 | 17 | 49.712 | P | 0.200 | 0.174  |
| SN64 | 2007 | 224 | 12 | 17 | 49.830 | P | 0.200 | -0.221 |
| SNB7 | 2007 | 224 | 12 | 17 | 49.932 | P | 0.200 | -0.123 |
| HELL | 2007 | 224 | 12 | 17 | 49.952 | P | 0.200 | -0.494 |
| YO06 | 2007 | 224 | 12 | 17 | 49.978 | P | 0.200 | -0.163 |
| YO07 | 2007 | 224 | 12 | 17 | 49.999 | P | 0.200 | -0.205 |
| M05C | 2007 | 224 | 12 | 17 | 50.051 | P | 0.200 | -0.120 |
| MWC  | 2007 | 224 | 12 | 17 | 50.065 | P | 0.200 | -0.527 |
| J04A | 2007 | 224 | 12 | 17 | 50.106 | P | 0.200 | -0.013 |
| K04A | 2007 | 224 | 12 | 17 | 50.242 | P | 0.200 | -0.005 |
| YO08 | 2007 | 224 | 12 | 17 | 50.268 | P | 0.200 | -0.153 |
| VCS  | 2007 | 224 | 12 | 17 | 50.323 | P | 0.200 | -0.153 |
| BEK  | 2007 | 224 | 12 | 17 | 50.341 | P | 0.200 | -0.216 |
| CHF  | 2007 | 224 | 12 | 17 | 50.409 | P | 0.200 | -0.365 |
| YO09 | 2007 | 224 | 12 | 17 | 50.449 | P | 0.200 | -0.161 |
| ELFS | 2007 | 224 | 12 | 17 | 50.522 | P | 0.200 | 0.149  |
| SN86 | 2007 | 224 | 12 | 17 | 50.552 | P | 0.200 | 0.030  |
| SNF9 | 2007 | 224 | 12 | 17 | 50.575 | P | 0.200 | -0.218 |

|      |      |     |    |    |        |   |       |        |
|------|------|-----|----|----|--------|---|-------|--------|
| SND8 | 2007 | 224 | 12 | 17 | 50.618 | P | 0.200 | 0.053  |
| YO10 | 2007 | 224 | 12 | 17 | 50.689 | P | 0.200 | -0.110 |
| ISA  | 2007 | 224 | 12 | 17 | 50.829 | P | 0.200 | -0.050 |
| YO11 | 2007 | 224 | 12 | 17 | 50.869 | P | 0.200 | -0.182 |
| SN97 | 2007 | 224 | 12 | 17 | 50.921 | P | 0.200 | 0.006  |
| SNA7 | 2007 | 224 | 12 | 17 | 51.117 | P | 0.200 | 0.152  |
| SN55 | 2007 | 224 | 12 | 17 | 51.232 | P | 0.200 | -0.164 |
| SNE9 | 2007 | 224 | 12 | 17 | 51.473 | P | 0.200 | -0.071 |
| EDW2 | 2007 | 224 | 12 | 17 | 51.609 | P | 0.200 | 0.041  |
| BFS  | 2007 | 224 | 12 | 17 | 51.616 | P | 0.200 | -0.397 |
| SN87 | 2007 | 224 | 12 | 17 | 51.782 | P | 0.200 | 0.210  |
| R06C | 2007 | 224 | 12 | 17 | 51.970 | P | 0.200 | 0.292  |
| P06A | 2007 | 224 | 12 | 17 | 52.001 | P | 0.200 | 0.125  |
| SND9 | 2007 | 224 | 12 | 17 | 52.039 | P | 0.200 | 0.238  |
| WCN  | 2007 | 224 | 12 | 17 | 52.154 | P | 0.200 | 0.385  |
| M06C | 2007 | 224 | 12 | 17 | 52.401 | P | 0.200 | 0.130  |
| SN98 | 2007 | 224 | 12 | 17 | 52.429 | P | 0.200 | 0.012  |
| R07C | 2007 | 224 | 12 | 17 | 52.730 | P | 0.200 | 0.107  |
| L05A | 2007 | 224 | 12 | 17 | 52.772 | P | 0.200 | 0.215  |
| SNB9 | 2007 | 224 | 12 | 17 | 52.800 | P | 0.200 | 0.248  |
| O06A | 2007 | 224 | 12 | 17 | 52.800 | P | 0.200 | -0.111 |
| MLAC | 2007 | 224 | 12 | 17 | 52.998 | P | 0.200 | 0.299  |
| VTV  | 2007 | 224 | 12 | 17 | 53.330 | P | 0.200 | -0.371 |
| J05A | 2007 | 224 | 12 | 17 | 53.407 | P | 0.200 | 0.268  |
| K05A | 2007 | 224 | 12 | 17 | 53.568 | P | 0.200 | 0.156  |
| CWC  | 2007 | 224 | 12 | 17 | 53.675 | P | 0.200 | -0.130 |
| N06A | 2007 | 224 | 12 | 17 | 53.824 | P | 0.200 | 0.003  |
| LRL  | 2007 | 224 | 12 | 17 | 53.864 | P | 0.200 | 0.119  |
| SVD  | 2007 | 224 | 12 | 17 | 53.877 | P | 0.200 | -0.187 |
| TIN  | 2007 | 224 | 12 | 17 | 54.088 | P | 0.200 | 0.064  |
| Q07A | 2007 | 224 | 12 | 17 | 54.643 | P | 0.200 | 0.021  |
| BBR  | 2007 | 224 | 12 | 17 | 55.048 | P | 0.200 | -0.113 |
| RRX  | 2007 | 224 | 12 | 17 | 55.282 | P | 0.200 | -0.129 |
| S08C | 2007 | 224 | 12 | 17 | 55.385 | P | 0.200 | 0.253  |
| P07A | 2007 | 224 | 12 | 17 | 55.435 | P | 0.200 | 0.108  |
| MPM  | 2007 | 224 | 12 | 17 | 55.610 | P | 0.200 | 0.233  |
| SLA  | 2007 | 224 | 12 | 17 | 55.900 | P | 0.200 | -0.044 |
| O07A | 2007 | 224 | 12 | 17 | 56.149 | P | 0.200 | -0.206 |
| R08A | 2007 | 224 | 12 | 17 | 56.261 | P | 0.200 | -0.113 |
| GSC  | 2007 | 224 | 12 | 17 | 56.981 | P | 0.200 | 0.092  |
| N07B | 2007 | 224 | 12 | 17 | 56.983 | P | 0.200 | 0.120  |
| GRA  | 2007 | 224 | 12 | 17 | 57.150 | P | 0.200 | 0.039  |
| M07A | 2007 | 224 | 12 | 17 | 57.288 | P | 0.200 | 0.080  |
| Q08A | 2007 | 224 | 12 | 17 | 57.720 | P | 0.200 | -0.089 |
| HEC  | 2007 | 224 | 12 | 17 | 57.728 | P | 0.200 | -0.214 |
| L07A | 2007 | 224 | 12 | 17 | 58.051 | P | 0.200 | 0.436  |
| FUR  | 2007 | 224 | 12 | 17 | 58.076 | P | 0.200 | 0.011  |
| P08A | 2007 | 224 | 12 | 17 | 58.637 | P | 0.200 | 0.099  |
| S09A | 2007 | 224 | 12 | 17 | 58.638 | P | 0.200 | -0.192 |
| TPH  | 2007 | 224 | 12 | 17 | 59.304 | P | 0.200 | -0.040 |
| O08A | 2007 | 224 | 12 | 17 | 59.367 | P | 0.200 | 0.203  |
| SHO  | 2007 | 224 | 12 | 17 | 59.396 | P | 0.200 | -0.313 |
| R09A | 2007 | 224 | 12 | 17 | 59.994 | P | 0.200 | -0.189 |
| N08A | 2007 | 224 | 12 | 18 | 0.132  | P | 0.200 | 0.292  |
| TUQ  | 2007 | 224 | 12 | 18 | 0.241  | P | 0.200 | -0.293 |
| U10A | 2007 | 224 | 12 | 18 | 0.465  | P | 0.200 | 0.276  |
| Q09A | 2007 | 224 | 12 | 18 | 0.601  | P | 0.200 | 0.111  |
| S10A | 2007 | 224 | 12 | 18 | 1.386  | P | 0.200 | -0.093 |
| TPNV | 2007 | 224 | 12 | 18 | 1.399  | P | 0.200 | 0.061  |
| P09A | 2007 | 224 | 12 | 18 | 1.485  | P | 0.200 | -0.128 |
| O09A | 2007 | 224 | 12 | 18 | 2.494  | P | 0.200 | 0.178  |
| V11A | 2007 | 224 | 12 | 18 | 2.743  | P | 0.200 | -0.099 |
| R10A | 2007 | 224 | 12 | 18 | 3.106  | P | 0.200 | 0.106  |

|      |      |     |    |    |       |   |       |        |
|------|------|-----|----|----|-------|---|-------|--------|
| Q10A | 2007 | 224 | 12 | 18 | 3.295 | P | 0.200 | -0.066 |
| S11A | 2007 | 224 | 12 | 18 | 3.884 | P | 0.200 | -0.181 |
| U11A | 2007 | 224 | 12 | 18 | 3.939 | P | 0.200 | 0.163  |
| P10A | 2007 | 224 | 12 | 18 | 4.015 | P | 0.200 | -0.225 |
| R11A | 2007 | 224 | 12 | 18 | 5.602 | P | 0.200 | -0.041 |
| T11A | 2007 | 224 | 12 | 18 | 5.658 | P | 0.200 | 0.205  |
| Q11A | 2007 | 224 | 12 | 18 | 6.017 | P | 0.200 | -0.026 |

|      |     |   |    |         |          |           |         |     |       |
|------|-----|---|----|---------|----------|-----------|---------|-----|-------|
| 2007 | 228 | 8 | 39 | 27.9406 | -9.83000 | 159.46700 | 10.0000 | 349 | 0.000 |
|------|-----|---|----|---------|----------|-----------|---------|-----|-------|

|      |      |     |   |    |        |   |       |        |
|------|------|-----|---|----|--------|---|-------|--------|
| FARB | 2007 | 228 | 8 | 52 | 9.504  | P | 0.200 | -0.384 |
| MCCM | 2007 | 228 | 8 | 52 | 10.537 | P | 0.200 | -0.412 |
| O01C | 2007 | 228 | 8 | 52 | 10.598 | P | 0.200 | 0.460  |
| JCC  | 2007 | 228 | 8 | 52 | 10.672 | P | 0.200 | 0.361  |
| P01C | 2007 | 228 | 8 | 52 | 11.193 | P | 0.200 | 0.142  |
| M01C | 2007 | 228 | 8 | 52 | 11.764 | P | 0.200 | 0.510  |
| K01A | 2007 | 228 | 8 | 52 | 12.049 | P | 0.200 | 0.684  |
| BNLO | 2007 | 228 | 8 | 52 | 12.288 | P | 0.200 | -0.152 |
| JRSC | 2007 | 228 | 8 | 52 | 12.383 | P | 0.200 | -0.063 |
| CVS  | 2007 | 228 | 8 | 52 | 12.455 | P | 0.200 | -0.482 |
| BRK  | 2007 | 228 | 8 | 52 | 12.790 | P | 0.200 | -0.183 |
| BKS  | 2007 | 228 | 8 | 52 | 13.087 | P | 0.200 | -0.054 |
| N02C | 2007 | 228 | 8 | 52 | 13.351 | P | 0.200 | 0.416  |
| BRIB | 2007 | 228 | 8 | 52 | 13.451 | P | 0.200 | 0.106  |
| MNRC | 2007 | 228 | 8 | 52 | 13.938 | P | 0.200 | 0.297  |
| HAST | 2007 | 228 | 8 | 52 | 14.017 | P | 0.200 | 0.167  |
| L02A | 2007 | 228 | 8 | 52 | 14.291 | P | 0.200 | 0.582  |
| TAKO | 2007 | 228 | 8 | 52 | 14.407 | P | 0.200 | 0.329  |
| GASB | 2007 | 228 | 8 | 52 | 14.437 | P | 0.200 | 0.770  |
| WENL | 2007 | 228 | 8 | 52 | 14.595 | P | 0.200 | 0.066  |
| O02C | 2007 | 228 | 8 | 52 | 14.598 | P | 0.200 | 0.548  |
| BDM  | 2007 | 228 | 8 | 52 | 14.701 | P | 0.200 | 0.231  |
| SAO  | 2007 | 228 | 8 | 52 | 14.710 | P | 0.200 | -0.091 |
| MHC  | 2007 | 228 | 8 | 52 | 14.978 | P | 0.200 | 0.076  |
| K02A | 2007 | 228 | 8 | 52 | 15.089 | P | 0.200 | 0.274  |
| V03C | 2007 | 228 | 8 | 52 | 15.120 | P | 0.200 | 0.519  |
| WDC  | 2007 | 228 | 8 | 52 | 15.487 | P | 0.200 | 0.149  |
| J02A | 2007 | 228 | 8 | 52 | 15.548 | P | 0.200 | 0.295  |
| Q03C | 2007 | 228 | 8 | 52 | 15.591 | P | 0.200 | 0.884  |
| SUTB | 2007 | 228 | 8 | 52 | 15.741 | P | 0.200 | -0.724 |
| PACP | 2007 | 228 | 8 | 52 | 15.798 | P | 0.200 | 0.057  |
| V04C | 2007 | 228 | 8 | 52 | 15.801 | P | 0.200 | 0.193  |
| M02C | 2007 | 228 | 8 | 52 | 15.929 | P | 0.200 | 0.627  |
| S04C | 2007 | 228 | 8 | 52 | 16.086 | P | 0.200 | 0.030  |
| O03C | 2007 | 228 | 8 | 52 | 16.354 | P | 0.200 | 0.059  |
| DBO  | 2007 | 228 | 8 | 52 | 16.381 | P | 0.200 | 0.186  |
| YBH  | 2007 | 228 | 8 | 52 | 16.707 | P | 0.200 | 0.449  |
| PHL  | 2007 | 228 | 8 | 52 | 16.712 | P | 0.200 | 0.134  |
| HUMO | 2007 | 228 | 8 | 52 | 16.935 | P | 0.200 | 0.424  |
| I03A | 2007 | 228 | 8 | 52 | 17.230 | P | 0.200 | 0.156  |
| Q04C | 2007 | 228 | 8 | 52 | 17.237 | P | 0.200 | -0.030 |
| PKD  | 2007 | 228 | 8 | 52 | 17.238 | P | 0.200 | 0.107  |
| U04C | 2007 | 228 | 8 | 52 | 17.366 | P | 0.200 | 0.543  |
| ORV  | 2007 | 228 | 8 | 52 | 17.597 | P | 0.200 | -0.188 |
| M03C | 2007 | 228 | 8 | 52 | 17.607 | P | 0.200 | -0.211 |
| SNG5 | 2007 | 228 | 8 | 52 | 17.649 | P | 0.200 | -0.217 |
| J03A | 2007 | 228 | 8 | 52 | 17.689 | P | 0.200 | 0.470  |
| SNC3 | 2007 | 228 | 8 | 52 | 17.874 | P | 0.200 | 0.092  |
| R04C | 2007 | 228 | 8 | 52 | 17.889 | P | 0.200 | -0.373 |
| SNE4 | 2007 | 228 | 8 | 52 | 17.914 | P | 0.200 | 0.020  |
| SCZ2 | 2007 | 228 | 8 | 52 | 18.151 | P | 0.200 | -0.351 |
| SND4 | 2007 | 228 | 8 | 52 | 18.310 | P | 0.200 | -0.107 |
| SNB3 | 2007 | 228 | 8 | 52 | 18.345 | P | 0.200 | -0.220 |
| SBC  | 2007 | 228 | 8 | 52 | 18.730 | P | 0.200 | 0.060  |

|      |      |     |   |    |        |   |       |        |
|------|------|-----|---|----|--------|---|-------|--------|
| SNC4 | 2007 | 228 | 8 | 52 | 18.774 | P | 0.200 | -0.182 |
| SNE5 | 2007 | 228 | 8 | 52 | 18.791 | P | 0.200 | -0.133 |
| SMM  | 2007 | 228 | 8 | 52 | 18.876 | P | 0.200 | 0.203  |
| S05C | 2007 | 228 | 8 | 52 | 19.101 | P | 0.200 | -0.446 |
| SND5 | 2007 | 228 | 8 | 52 | 19.141 | P | 0.200 | -0.282 |
| MPP  | 2007 | 228 | 8 | 52 | 19.195 | P | 0.200 | 0.172  |
| SNF6 | 2007 | 228 | 8 | 52 | 19.391 | P | 0.200 | -0.215 |
| SNA3 | 2007 | 228 | 8 | 52 | 19.401 | P | 0.200 | 0.165  |
| LAVA | 2007 | 228 | 8 | 52 | 19.468 | P | 0.200 | -0.122 |
| I04A | 2007 | 228 | 8 | 52 | 19.499 | P | 0.200 | -0.237 |
| SNG7 | 2007 | 228 | 8 | 52 | 19.506 | P | 0.200 | -0.275 |
| SNC5 | 2007 | 228 | 8 | 52 | 19.531 | P | 0.200 | -0.400 |
| HATC | 2007 | 228 | 8 | 52 | 19.534 | P | 0.200 | -0.033 |
| M04C | 2007 | 228 | 8 | 52 | 19.545 | P | 0.200 | 0.271  |
| SN93 | 2007 | 228 | 8 | 52 | 19.665 | P | 0.200 | 0.297  |
| L04A | 2007 | 228 | 8 | 52 | 19.695 | P | 0.200 | 0.055  |
| CMB  | 2007 | 228 | 8 | 52 | 19.968 | P | 0.200 | -0.080 |
| V05C | 2007 | 228 | 8 | 52 | 19.982 | P | 0.200 | 0.548  |
| SNA4 | 2007 | 228 | 8 | 52 | 20.011 | P | 0.200 | -0.060 |
| SNE6 | 2007 | 228 | 8 | 52 | 20.071 | P | 0.200 | -0.178 |
| SNB5 | 2007 | 228 | 8 | 52 | 20.202 | P | 0.200 | -0.255 |
| O04C | 2007 | 228 | 8 | 52 | 20.253 | P | 0.200 | -0.003 |
| J04A | 2007 | 228 | 8 | 52 | 20.263 | P | 0.200 | -0.025 |
| LGU  | 2007 | 228 | 8 | 52 | 20.291 | P | 0.200 | -0.556 |
| O05C | 2007 | 228 | 8 | 52 | 20.376 | P | 0.200 | 0.118  |
| K04A | 2007 | 228 | 8 | 52 | 20.764 | P | 0.200 | 0.046  |
| P05C | 2007 | 228 | 8 | 52 | 21.012 | P | 0.200 | 0.157  |
| SNA5 | 2007 | 228 | 8 | 52 | 21.018 | P | 0.200 | -0.167 |
| SNE7 | 2007 | 228 | 8 | 52 | 21.060 | P | 0.200 | 0.045  |
| T06C | 2007 | 228 | 8 | 52 | 21.092 | P | 0.200 | -0.383 |
| SNC6 | 2007 | 228 | 8 | 52 | 21.122 | P | 0.200 | -0.047 |
| M05C | 2007 | 228 | 8 | 52 | 21.259 | P | 0.200 | -0.035 |
| SNF8 | 2007 | 228 | 8 | 52 | 21.400 | P | 0.200 | -0.300 |
| SND7 | 2007 | 228 | 8 | 52 | 21.439 | P | 0.200 | 0.158  |
| SNB6 | 2007 | 228 | 8 | 52 | 21.554 | P | 0.200 | -0.103 |
| S06C | 2007 | 228 | 8 | 52 | 21.588 | P | 0.200 | -0.525 |
| SN63 | 2007 | 228 | 8 | 52 | 21.666 | P | 0.200 | -0.399 |
| VES  | 2007 | 228 | 8 | 52 | 21.744 | P | 0.200 | -0.647 |
| RCT  | 2007 | 228 | 8 | 52 | 21.746 | P | 0.200 | -0.607 |
| SNC7 | 2007 | 228 | 8 | 52 | 21.852 | P | 0.200 | 0.175  |
| YO01 | 2007 | 228 | 8 | 52 | 21.882 | P | 0.200 | -0.252 |
| ELFS | 2007 | 228 | 8 | 52 | 21.991 | P | 0.200 | 0.154  |
| YO02 | 2007 | 228 | 8 | 52 | 21.998 | P | 0.200 | -0.349 |
| SN96 | 2007 | 228 | 8 | 52 | 22.046 | P | 0.200 | -0.060 |
| CIA  | 2007 | 228 | 8 | 52 | 22.097 | P | 0.200 | -0.585 |
| YO03 | 2007 | 228 | 8 | 52 | 22.157 | P | 0.200 | -0.247 |
| BEK  | 2007 | 228 | 8 | 52 | 22.175 | P | 0.200 | -0.217 |
| R05C | 2007 | 228 | 8 | 52 | 22.229 | P | 0.200 | 0.041  |
| YO04 | 2007 | 228 | 8 | 52 | 22.271 | P | 0.200 | -0.328 |
| SNB7 | 2007 | 228 | 8 | 52 | 22.283 | P | 0.200 | -0.017 |
| SNF9 | 2007 | 228 | 8 | 52 | 22.293 | P | 0.200 | -0.164 |
| YO05 | 2007 | 228 | 8 | 52 | 22.416 | P | 0.200 | -0.325 |
| SND8 | 2007 | 228 | 8 | 52 | 22.553 | P | 0.200 | 0.055  |
| RPV  | 2007 | 228 | 8 | 52 | 22.631 | P | 0.200 | -0.410 |
| ARV  | 2007 | 228 | 8 | 52 | 22.696 | P | 0.200 | -0.007 |
| SN64 | 2007 | 228 | 8 | 52 | 22.749 | P | 0.200 | -0.117 |
| DJJ  | 2007 | 228 | 8 | 52 | 22.758 | P | 0.200 | -0.304 |
| OSI  | 2007 | 228 | 8 | 52 | 22.765 | P | 0.200 | -0.049 |
| YO06 | 2007 | 228 | 8 | 52 | 22.850 | P | 0.200 | -0.107 |
| YO07 | 2007 | 228 | 8 | 52 | 22.934 | P | 0.200 | -0.096 |
| SN86 | 2007 | 228 | 8 | 52 | 23.006 | P | 0.200 | -0.005 |
| FMP  | 2007 | 228 | 8 | 52 | 23.020 | P | 0.200 | -0.309 |
| YO08 | 2007 | 228 | 8 | 52 | 23.153 | P | 0.200 | -0.097 |

|      |      |     |   |    |        |   |       |        |
|------|------|-----|---|----|--------|---|-------|--------|
| SNE9 | 2007 | 228 | 8 | 52 | 23.200 | P | 0.200 | -0.065 |
| DEC  | 2007 | 228 | 8 | 52 | 23.267 | P | 0.200 | -0.477 |
| YO09 | 2007 | 228 | 8 | 52 | 23.273 | P | 0.200 | -0.145 |
| HELL | 2007 | 228 | 8 | 52 | 23.304 | P | 0.200 | -0.474 |
| SN97 | 2007 | 228 | 8 | 52 | 23.355 | P | 0.200 | 0.123  |
| SNA7 | 2007 | 228 | 8 | 52 | 23.407 | P | 0.200 | 0.217  |
| L05A | 2007 | 228 | 8 | 52 | 23.467 | P | 0.200 | 0.218  |
| YO10 | 2007 | 228 | 8 | 52 | 23.483 | P | 0.200 | -0.109 |
| J05A | 2007 | 228 | 8 | 52 | 23.508 | P | 0.200 | 0.321  |
| M06C | 2007 | 228 | 8 | 52 | 23.520 | P | 0.200 | 0.121  |
| YO11 | 2007 | 228 | 8 | 52 | 23.743 | P | 0.200 | -0.069 |
| PASC | 2007 | 228 | 8 | 52 | 23.746 | P | 0.200 | -0.540 |
| SND9 | 2007 | 228 | 8 | 52 | 23.752 | P | 0.200 | 0.142  |
| P06A | 2007 | 228 | 8 | 52 | 23.830 | P | 0.200 | 0.090  |
| USC  | 2007 | 228 | 8 | 52 | 23.909 | P | 0.200 | 0.341  |
| SN55 | 2007 | 228 | 8 | 52 | 24.047 | P | 0.200 | -0.095 |
| K05A | 2007 | 228 | 8 | 52 | 24.096 | P | 0.200 | 0.360  |
| SN87 | 2007 | 228 | 8 | 52 | 24.109 | P | 0.200 | 0.178  |
| WCN  | 2007 | 228 | 8 | 52 | 24.218 | P | 0.200 | 0.390  |
| R06C | 2007 | 228 | 8 | 52 | 24.410 | P | 0.200 | 0.296  |
| MWC  | 2007 | 228 | 8 | 52 | 24.428 | P | 0.200 | -0.611 |
| O06A | 2007 | 228 | 8 | 52 | 24.459 | P | 0.200 | -0.060 |
| ISA  | 2007 | 228 | 8 | 52 | 24.575 | P | 0.200 | -0.083 |
| VCS  | 2007 | 228 | 8 | 52 | 24.664 | P | 0.200 | -0.141 |
| SN98 | 2007 | 228 | 8 | 52 | 24.704 | P | 0.200 | 0.078  |
| CHF  | 2007 | 228 | 8 | 52 | 24.761 | P | 0.200 | -0.405 |
| SNB9 | 2007 | 228 | 8 | 52 | 24.862 | P | 0.200 | 0.316  |
| N06A | 2007 | 228 | 8 | 52 | 25.171 | P | 0.200 | 0.056  |
| R07C | 2007 | 228 | 8 | 52 | 25.345 | P | 0.200 | 0.096  |
| MLAC | 2007 | 228 | 8 | 52 | 25.725 | P | 0.200 | 0.203  |
| EDW2 | 2007 | 228 | 8 | 52 | 25.777 | P | 0.200 | 0.108  |
| BFS  | 2007 | 228 | 8 | 52 | 25.903 | P | 0.200 | -0.483 |
| Q07A | 2007 | 228 | 8 | 52 | 26.833 | P | 0.200 | 0.066  |
| CWC  | 2007 | 228 | 8 | 52 | 27.013 | P | 0.200 | -0.111 |
| TIN  | 2007 | 228 | 8 | 52 | 27.082 | P | 0.200 | 0.021  |
| P07A | 2007 | 228 | 8 | 52 | 27.220 | P | 0.200 | 0.057  |
| ADO  | 2007 | 228 | 8 | 52 | 27.403 | P | 0.200 | -0.192 |
| VTV  | 2007 | 228 | 8 | 52 | 27.554 | P | 0.200 | -0.306 |
| LRL  | 2007 | 228 | 8 | 52 | 27.581 | P | 0.200 | 0.070  |
| O07A | 2007 | 228 | 8 | 52 | 27.808 | P | 0.200 | -0.046 |
| S08C | 2007 | 228 | 8 | 52 | 28.193 | P | 0.200 | 0.248  |
| N07B | 2007 | 228 | 8 | 52 | 28.226 | P | 0.200 | 0.170  |
| M07A | 2007 | 228 | 8 | 52 | 28.230 | P | 0.200 | 0.136  |
| SVD  | 2007 | 228 | 8 | 52 | 28.241 | P | 0.200 | -0.173 |
| L07A | 2007 | 228 | 8 | 52 | 28.674 | P | 0.200 | 0.482  |
| R08A | 2007 | 228 | 8 | 52 | 28.725 | P | 0.200 | 0.009  |
| MPM  | 2007 | 228 | 8 | 52 | 28.959 | P | 0.200 | 0.134  |
| RRX  | 2007 | 228 | 8 | 52 | 29.151 | P | 0.200 | -0.196 |
| BBR  | 2007 | 228 | 8 | 52 | 29.157 | P | 0.200 | -0.263 |
| SLA  | 2007 | 228 | 8 | 52 | 29.406 | P | 0.200 | -0.024 |
| Q08A | 2007 | 228 | 8 | 52 | 29.805 | P | 0.200 | -0.086 |
| GRA  | 2007 | 228 | 8 | 52 | 30.164 | P | 0.200 | 0.114  |
| P08A | 2007 | 228 | 8 | 52 | 30.510 | P | 0.200 | 0.325  |
| GSC  | 2007 | 228 | 8 | 52 | 30.565 | P | 0.200 | -0.034 |
| O08A | 2007 | 228 | 8 | 52 | 30.842 | P | 0.200 | 0.315  |
| FUR  | 2007 | 228 | 8 | 52 | 31.194 | P | 0.200 | -0.017 |
| S09A | 2007 | 228 | 8 | 52 | 31.222 | P | 0.200 | -0.170 |
| N08A | 2007 | 228 | 8 | 52 | 31.305 | P | 0.200 | 0.359  |
| HEC  | 2007 | 228 | 8 | 52 | 31.530 | P | 0.200 | -0.290 |
| TPH  | 2007 | 228 | 8 | 52 | 31.564 | P | 0.200 | -0.170 |
| R09A | 2007 | 228 | 8 | 52 | 32.308 | P | 0.200 | -0.149 |
| Q09A | 2007 | 228 | 8 | 52 | 32.481 | P | 0.200 | -0.024 |
| SHO  | 2007 | 228 | 8 | 52 | 32.776 | P | 0.200 | -0.280 |

|      |      |     |    |         |          |           |          |           |
|------|------|-----|----|---------|----------|-----------|----------|-----------|
| P09A | 2007 | 228 | 8  | 52      | 33.257   | P         | 0.200    | -0.021    |
| U10A | 2007 | 228 | 8  | 52      | 33.550   | P         | 0.200    | 0.277     |
| TUQ  | 2007 | 228 | 8  | 52      | 33.806   | P         | 0.200    | -0.264    |
| S10A | 2007 | 228 | 8  | 52      | 33.867   | P         | 0.200    | -0.016    |
| O09A | 2007 | 228 | 8  | 52      | 33.966   | P         | 0.200    | 0.291     |
| BMN  | 2007 | 228 | 8  | 52      | 34.006   | P         | 0.200    | 0.151     |
| TPNV | 2007 | 228 | 8  | 52      | 34.122   | P         | 0.200    | -0.078    |
| R10A | 2007 | 228 | 8  | 52      | 35.445   | P         | 0.200    | 0.223     |
| Q10A | 2007 | 228 | 8  | 52      | 35.583   | P         | 0.200    | 0.247     |
| P10A | 2007 | 228 | 8  | 52      | 35.630   | P         | 0.200    | -0.197    |
| V11A | 2007 | 228 | 8  | 52      | 36.130   | P         | 0.200    | -0.031    |
| S11A | 2007 | 228 | 8  | 52      | 36.354   | P         | 0.200    | -0.210    |
| U11A | 2007 | 228 | 8  | 52      | 37.008   | P         | 0.200    | 0.213     |
| R11A | 2007 | 228 | 8  | 52      | 37.946   | P         | 0.200    | 0.149     |
| Q11A | 2007 | 228 | 8  | 52      | 38.033   | P         | 0.200    | 0.051     |
| T11A | 2007 | 228 | 8  | 52      | 38.301   | P         | 0.200    | 0.192     |
|      |      |     |    |         |          |           |          |           |
| 1988 | 209  | 16  | 58 | 18.4313 | 18.58300 | 145.60400 | 217.0000 | 414 0.000 |
| arc  | 1988 | 209 | 17 | 10      | 24.720   | P         | 0.200    | -0.370    |
| bmd  | 1988 | 209 | 17 | 10      | 24.880   | P         | 0.200    | -0.460    |
| jhn  | 1988 | 209 | 17 | 10      | 23.650   | P         | 0.200    | -0.585    |
| ndl  | 1988 | 209 | 17 | 10      | 23.900   | P         | 0.200    | -0.356    |
| bar  | 1988 | 209 | 17 | 10      | 23.680   | P         | 0.200    | -0.039    |
| jun  | 1988 | 209 | 17 | 10      | 23.910   | P         | 0.200    | -0.044    |
| twr  | 1988 | 209 | 17 | 10      | 24.190   | P         | 0.200    | -0.054    |
| wil  | 1988 | 209 | 17 | 10      | 24.280   | P         | 0.200    | -0.108    |
| BMT  | 1988 | 209 | 17 | 10      | 25.680   | P         | 0.200    | 0.412     |
| CAL  | 1988 | 209 | 17 | 10      | 28.160   | P         | 0.200    | 0.437     |
| CLC  | 1988 | 209 | 17 | 10      | 28.080   | P         | 0.200    | -0.026    |
| DTP  | 1988 | 209 | 17 | 10      | 28.370   | P         | 0.200    | 0.367     |
| JAW  | 1988 | 209 | 17 | 10      | 27.350   | P         | 0.200    | 0.242     |
| JFS  | 1988 | 209 | 17 | 10      | 28.980   | P         | 0.200    | 0.443     |
| LRM  | 1988 | 209 | 17 | 10      | 28.380   | P         | 0.200    | 0.098     |
| SBK  | 1988 | 209 | 17 | 10      | 29.670   | P         | 0.200    | 0.340     |
| SRT  | 1988 | 209 | 17 | 10      | 27.890   | P         | 0.200    | 0.191     |
| TEJ  | 1988 | 209 | 17 | 10      | 24.730   | P         | 0.200    | -0.001    |
| TOW  | 1988 | 209 | 17 | 10      | 27.770   | P         | 0.200    | 0.348     |
| WBM  | 1988 | 209 | 17 | 10      | 27.300   | P         | 0.200    | -0.050    |
| WBS  | 1988 | 209 | 17 | 10      | 26.240   | P         | 0.200    | -0.240    |
| WCH  | 1988 | 209 | 17 | 10      | 26.010   | P         | 0.200    | -0.370    |
| WCS  | 1988 | 209 | 17 | 10      | 27.420   | P         | 0.200    | 0.305     |
| WCX  | 1988 | 209 | 17 | 10      | 28.100   | P         | 0.200    | -0.162    |
| WHS  | 1988 | 209 | 17 | 10      | 27.360   | P         | 0.200    | 0.312     |
| WHV  | 1988 | 209 | 17 | 10      | 24.650   | P         | 0.200    | -0.416    |
| WJP  | 1988 | 209 | 17 | 10      | 25.210   | P         | 0.200    | -0.034    |
| WLH  | 1988 | 209 | 17 | 10      | 24.920   | P         | 0.200    | -0.075    |
| WOF  | 1988 | 209 | 17 | 10      | 23.690   | P         | 0.200    | -0.581    |
| WRC  | 1988 | 209 | 17 | 10      | 27.870   | P         | 0.200    | 0.231     |
| WSC  | 1988 | 209 | 17 | 10      | 26.930   | P         | 0.200    | -0.233    |
| WVP  | 1988 | 209 | 17 | 10      | 27.170   | P         | 0.200    | 0.097     |
| XMS  | 1988 | 209 | 17 | 10      | 29.730   | P         | 0.200    | 0.381     |
|      |      |     |    |         |          |           |          |           |
| 1988 | 210  | 22  | 36 | 25.7380 | 29.34700 | 142.16000 | 40.0000  | 416 0.000 |
| arc  | 1988 | 210 | 22 | 48      | 32.720   | P         | 0.200    | -0.277    |
| mnk  | 1988 | 210 | 22 | 48      | 30.910   | P         | 0.200    | 0.133     |
| pmt  | 1988 | 210 | 22 | 48      | 33.230   | P         | 0.200    | -0.272    |
| WMD  | 1988 | 210 | 22 | 48      | 31.600   | P         | 0.200    | -0.084    |
| DTP  | 1988 | 210 | 22 | 48      | 36.980   | P         | 0.200    | 0.315     |
| CLC  | 1988 | 210 | 22 | 48      | 36.120   | P         | 0.200    | -0.085    |
| WHS  | 1988 | 210 | 22 | 48      | 34.960   | P         | 0.200    | 0.095     |
| WRC  | 1988 | 210 | 22 | 48      | 35.760   | P         | 0.200    | 0.150     |
| WVP  | 1988 | 210 | 22 | 48      | 35.080   | P         | 0.200    | 0.025     |



|      |      |     |    |         |          |           |          |        |       |
|------|------|-----|----|---------|----------|-----------|----------|--------|-------|
| 1988 | 248  | 0   | 32 | 20.2515 | 22.05800 | 142.88400 | 252.0000 | 436    | 0.000 |
| arc  | 1988 | 248 | 0  | 44      | 22.830   | P         | 0.200    | -0.335 |       |
| bkr  | 1988 | 248 | 0  | 44      | 22.220   | P         | 0.200    | -0.654 |       |
| bmd  | 1988 | 248 | 0  | 44      | 23.050   | P         | 0.200    | -0.422 |       |
| ccr  | 1988 | 248 | 0  | 44      | 20.570   | P         | 0.200    | 0.189  |       |
| jhn  | 1988 | 248 | 0  | 44      | 21.800   | P         | 0.200    | -0.564 |       |
| WMD  | 1988 | 248 | 0  | 44      | 21.820   | P         | 0.200    | -0.154 |       |
| ARV  | 1988 | 248 | 0  | 44      | 22.690   | P         | 0.200    | 0.010  |       |
| BMT  | 1988 | 248 | 0  | 44      | 24.070   | P         | 0.200    | 0.365  |       |
| CAL  | 1988 | 248 | 0  | 44      | 26.580   | P         | 0.200    | 0.497  |       |
| CLC  | 1988 | 248 | 0  | 44      | 26.160   | P         | 0.200    | -0.029 |       |
| DTP  | 1988 | 248 | 0  | 44      | 26.670   | P         | 0.200    | 0.371  |       |
| ISA  | 1988 | 248 | 0  | 44      | 22.650   | P         | 0.200    | -0.391 |       |
| JFS  | 1988 | 248 | 0  | 44      | 27.210   | P         | 0.200    | 0.445  |       |
| LRM  | 1988 | 248 | 0  | 44      | 26.590   | P         | 0.200    | 0.116  |       |
| SRT  | 1988 | 248 | 0  | 44      | 26.010   | P         | 0.200    | 0.171  |       |
| TOW  | 1988 | 248 | 0  | 44      | 25.910   | P         | 0.200    | 0.378  |       |
| WBM  | 1988 | 248 | 0  | 44      | 25.490   | P         | 0.200    | -0.042 |       |
| WCH  | 1988 | 248 | 0  | 44      | 24.130   | P         | 0.200    | -0.364 |       |
| WLH  | 1988 | 248 | 0  | 44      | 22.960   | P         | 0.200    | -0.067 |       |
| WRC  | 1988 | 248 | 0  | 44      | 25.890   | P         | 0.200    | 0.208  |       |
| WSC  | 1988 | 248 | 0  | 44      | 25.100   | P         | 0.200    | -0.207 |       |
| WVP  | 1988 | 248 | 0  | 44      | 25.230   | P         | 0.200    | 0.093  |       |
| XMS  | 1988 | 248 | 0  | 44      | 27.880   | P         | 0.200    | 0.387  |       |
|      |      |     |    |         |          |           |          |        |       |
| 2005 | 360  | 13  | 48 | 2.9286  | 26.82200 | 140.64600 | 7.4000   | 55     | 0.000 |
| I03A | 2005 | 360 | 13 | 59      | 51.398   | P         | 0.200    | 0.789  |       |
| DBO  | 2005 | 360 | 13 | 59      | 53.545   | P         | 0.200    | 0.637  |       |
| HUMO | 2005 | 360 | 13 | 59      | 55.622   | P         | 0.200    | 0.572  |       |
| YBH  | 2005 | 360 | 13 | 59      | 58.701   | P         | 0.200    | 0.604  |       |
| M02C | 2005 | 360 | 13 | 59      | 59.247   | P         | 0.200    | 0.934  |       |
| M03C | 2005 | 360 | 14 | 0       | 1.467    | P         | 0.200    | -0.007 |       |
| M04C | 2005 | 360 | 14 | 0       | 1.635    | P         | 0.200    | 0.266  |       |
| GASB | 2005 | 360 | 14 | 0       | 3.848    | P         | 0.200    | 0.748  |       |
| O03C | 2005 | 360 | 14 | 0       | 4.878    | P         | 0.200    | 0.148  |       |
| M05C | 2005 | 360 | 14 | 0       | 5.097    | P         | 0.200    | 0.095  |       |
| MNRC | 2005 | 360 | 14 | 0       | 6.434    | P         | 0.200    | 0.469  |       |
| ORV  | 2005 | 360 | 14 | 0       | 7.310    | P         | 0.200    | -0.580 |       |
| O04C | 2005 | 360 | 14 | 0       | 7.755    | P         | 0.200    | 0.004  |       |
| M06C | 2005 | 360 | 14 | 0       | 8.110    | P         | 0.200    | 0.183  |       |
| BRK  | 2005 | 360 | 14 | 0       | 8.615    | P         | 0.200    | -0.264 |       |
| ELFS | 2005 | 360 | 14 | 0       | 8.685    | P         | 0.200    | 0.377  |       |
| O05C | 2005 | 360 | 14 | 0       | 9.047    | P         | 0.200    | -0.005 |       |
| Q03C | 2005 | 360 | 14 | 0       | 9.174    | P         | 0.200    | 1.186  |       |
| P05C | 2005 | 360 | 14 | 0       | 11.948   | P         | 0.200    | -0.087 |       |
| LAVA | 2005 | 360 | 14 | 0       | 12.515   | P         | 0.200    | -0.223 |       |
| R04C | 2005 | 360 | 14 | 0       | 12.661   | P         | 0.200    | -0.320 |       |
| MHC  | 2005 | 360 | 14 | 0       | 12.730   | P         | 0.200    | -0.004 |       |
| PACP | 2005 | 360 | 14 | 0       | 14.900   | P         | 0.200    | 0.093  |       |
| HAST | 2005 | 360 | 14 | 0       | 15.050   | P         | 0.200    | -0.169 |       |
| SN95 | 2005 | 360 | 14 | 0       | 15.473   | P         | 0.200    | -0.164 |       |
| R05C | 2005 | 360 | 14 | 0       | 15.597   | P         | 0.200    | 0.068  |       |
| SN71 | 2005 | 360 | 14 | 0       | 16.065   | P         | 0.200    | -0.528 |       |
| SN73 | 2005 | 360 | 14 | 0       | 17.035   | P         | 0.200    | -0.330 |       |
| S05C | 2005 | 360 | 14 | 0       | 17.109   | P         | 0.200    | -0.469 |       |
| SN86 | 2005 | 360 | 14 | 0       | 17.263   | P         | 0.200    | 0.092  |       |
| T05C | 2005 | 360 | 14 | 0       | 17.629   | P         | 0.200    | 0.275  |       |
| V03C | 2005 | 360 | 14 | 0       | 17.752   | P         | 0.200    | 0.551  |       |
| SN62 | 2005 | 360 | 14 | 0       | 17.857   | P         | 0.200    | -0.485 |       |
| S06C | 2005 | 360 | 14 | 0       | 17.985   | P         | 0.200    | -0.304 |       |
| R06C | 2005 | 360 | 14 | 0       | 18.571   | P         | 0.200    | 0.274  |       |
| U04C | 2005 | 360 | 14 | 0       | 18.636   | P         | 0.200    | 0.367  |       |
| SN76 | 2005 | 360 | 14 | 0       | 18.727   | P         | 0.200    | 0.210  |       |

|      |      |     |    |   |        |   |       |        |
|------|------|-----|----|---|--------|---|-------|--------|
| SN51 | 2005 | 360 | 14 | 0 | 18.813 | P | 0.200 | 0.055  |
| SN52 | 2005 | 360 | 14 | 0 | 19.017 | P | 0.200 | -0.531 |
| SN53 | 2005 | 360 | 14 | 0 | 19.579 | P | 0.200 | -0.368 |
| SN54 | 2005 | 360 | 14 | 0 | 19.851 | P | 0.200 | -0.225 |
| V04C | 2005 | 360 | 14 | 0 | 20.088 | P | 0.200 | 0.563  |
| RAMR | 2005 | 360 | 14 | 0 | 20.089 | P | 0.200 | 0.567  |
| PKD  | 2005 | 360 | 14 | 0 | 20.113 | P | 0.200 | -0.073 |
| T06C | 2005 | 360 | 14 | 0 | 20.427 | P | 0.200 | -0.343 |
| SN43 | 2005 | 360 | 14 | 0 | 20.739 | P | 0.200 | -0.275 |
| R07C | 2005 | 360 | 14 | 0 | 21.128 | P | 0.200 | 0.140  |
| U05C | 2005 | 360 | 14 | 0 | 21.236 | P | 0.200 | 0.526  |
| SN57 | 2005 | 360 | 14 | 0 | 21.243 | P | 0.200 | 0.278  |
| SN44 | 2005 | 360 | 14 | 0 | 21.396 | P | 0.200 | -0.027 |
| SN22 | 2005 | 360 | 14 | 0 | 21.781 | P | 0.200 | -0.459 |
| SN45 | 2005 | 360 | 14 | 0 | 21.885 | P | 0.200 | 0.144  |
| SN11 | 2005 | 360 | 14 | 0 | 22.316 | P | 0.200 | -0.604 |
| SN23 | 2005 | 360 | 14 | 0 | 22.354 | P | 0.200 | -0.304 |
| SN46 | 2005 | 360 | 14 | 0 | 22.412 | P | 0.200 | 0.122  |
| SN34 | 2005 | 360 | 14 | 0 | 22.469 | P | 0.200 | -0.185 |
| SN47 | 2005 | 360 | 14 | 0 | 22.521 | P | 0.200 | 0.086  |
| SN48 | 2005 | 360 | 14 | 0 | 22.588 | P | 0.200 | 0.051  |
| V05C | 2005 | 360 | 14 | 0 | 23.244 | P | 0.200 | 0.595  |
| MNV  | 2005 | 360 | 14 | 0 | 23.329 | P | 0.200 | 0.036  |
| SN36 | 2005 | 360 | 14 | 0 | 23.401 | P | 0.200 | 0.052  |
| SN37 | 2005 | 360 | 14 | 0 | 23.448 | P | 0.200 | 0.009  |
| SN38 | 2005 | 360 | 14 | 0 | 23.534 | P | 0.200 | 0.006  |
| RCT  | 2005 | 360 | 14 | 0 | 23.578 | P | 0.200 | -0.490 |
| HELL | 2005 | 360 | 14 | 0 | 23.847 | P | 0.200 | -0.446 |
| SN25 | 2005 | 360 | 14 | 0 | 24.078 | P | 0.200 | 0.035  |
| SMM  | 2005 | 360 | 14 | 0 | 24.119 | P | 0.200 | 0.294  |
| SN26 | 2005 | 360 | 14 | 0 | 24.262 | P | 0.200 | 0.178  |
| SN28 | 2005 | 360 | 14 | 0 | 24.681 | P | 0.200 | 0.174  |
| SN15 | 2005 | 360 | 14 | 0 | 24.716 | P | 0.200 | 0.148  |
| VES  | 2005 | 360 | 14 | 0 | 25.001 | P | 0.200 | -0.940 |
| S08C | 2005 | 360 | 14 | 0 | 25.855 | P | 0.200 | 0.154  |
| MPP  | 2005 | 360 | 14 | 0 | 25.889 | P | 0.200 | 0.213  |
| TIN  | 2005 | 360 | 14 | 0 | 26.428 | P | 0.200 | 0.018  |
| SBC  | 2005 | 360 | 14 | 0 | 27.092 | P | 0.200 | 0.157  |
| ISA  | 2005 | 360 | 14 | 0 | 27.869 | P | 0.200 | -0.793 |
| SCZ2 | 2005 | 360 | 14 | 0 | 27.917 | P | 0.200 | -0.340 |
| ARV  | 2005 | 360 | 14 | 0 | 28.338 | P | 0.200 | -0.236 |
| CWC  | 2005 | 360 | 14 | 0 | 28.434 | P | 0.200 | -0.041 |
| GRA  | 2005 | 360 | 14 | 0 | 29.685 | P | 0.200 | 0.211  |
| LGU  | 2005 | 360 | 14 | 0 | 29.760 | P | 0.200 | -0.500 |
| OSI  | 2005 | 360 | 14 | 0 | 30.479 | P | 0.200 | 0.117  |
| MPM  | 2005 | 360 | 14 | 0 | 31.542 | P | 0.200 | -0.065 |
| DEC  | 2005 | 360 | 14 | 0 | 32.163 | P | 0.200 | -0.516 |
| EDW2 | 2005 | 360 | 14 | 0 | 32.506 | P | 0.200 | 0.181  |
| FUR  | 2005 | 360 | 14 | 0 | 32.514 | P | 0.200 | 0.051  |
| TPNV | 2005 | 360 | 14 | 0 | 33.629 | P | 0.200 | -0.249 |
| FMP  | 2005 | 360 | 14 | 0 | 33.721 | P | 0.200 | -0.207 |
| CIA  | 2005 | 360 | 14 | 0 | 33.872 | P | 0.200 | -0.539 |
| BFS  | 2005 | 360 | 14 | 0 | 34.759 | P | 0.200 | -0.537 |
| SHO  | 2005 | 360 | 14 | 0 | 35.984 | P | 0.200 | -0.222 |
| RRX  | 2005 | 360 | 14 | 0 | 36.038 | P | 0.200 | 0.053  |
| BBR  | 2005 | 360 | 14 | 0 | 37.513 | P | 0.200 | -0.704 |

|      |      |    |    |         |          |           |         |       |       |
|------|------|----|----|---------|----------|-----------|---------|-------|-------|
| 2006 | 3    | 12 | 27 | 58.2591 | 13.84100 | 145.28700 | 78.2000 | 101   | 0.002 |
| HUMO | 2006 | 3  | 12 | 40      | 10.502   | P         | 0.200   | 0.373 |       |
| N02C | 2006 | 3  | 12 | 40      | 10.968   | P         | 0.200   | 0.338 |       |
| P01C | 2006 | 3  | 12 | 40      | 12.106   | P         | 0.200   | 0.182 |       |
| M02C | 2006 | 3  | 12 | 40      | 12.364   | P         | 0.200   | 0.520 |       |
| YBH  | 2006 | 3  | 12 | 40      | 12.402   | P         | 0.200   | 0.336 |       |

|      |      |   |    |    |        |   |       |        |
|------|------|---|----|----|--------|---|-------|--------|
| WDC  | 2006 | 3 | 12 | 40 | 14.078 | P | 0.200 | 0.262  |
| O02C | 2006 | 3 | 12 | 40 | 14.104 | P | 0.200 | 0.636  |
| M03C | 2006 | 3 | 12 | 40 | 14.729 | P | 0.200 | -0.132 |
| GASB | 2006 | 3 | 12 | 40 | 15.144 | P | 0.200 | 0.735  |
| M04C | 2006 | 3 | 12 | 40 | 15.342 | P | 0.200 | -0.022 |
| O03C | 2006 | 3 | 12 | 40 | 16.370 | P | 0.200 | -0.089 |
| CVS  | 2006 | 3 | 12 | 40 | 16.421 | P | 0.200 | -0.271 |
| MNRC | 2006 | 3 | 12 | 40 | 16.650 | P | 0.200 | 0.358  |
| BRK  | 2006 | 3 | 12 | 40 | 17.818 | P | 0.200 | -0.155 |
| HATC | 2006 | 3 | 12 | 40 | 17.838 | P | 0.200 | -0.031 |
| M05C | 2006 | 3 | 12 | 40 | 18.264 | P | 0.200 | -0.202 |
| ORV  | 2006 | 3 | 12 | 40 | 18.654 | P | 0.200 | -0.455 |
| BNLO | 2006 | 3 | 12 | 40 | 18.989 | P | 0.200 | -0.162 |
| O04C | 2006 | 3 | 12 | 40 | 19.916 | P | 0.200 | -0.014 |
| WENL | 2006 | 3 | 12 | 40 | 20.281 | P | 0.200 | 0.030  |
| O05C | 2006 | 3 | 12 | 40 | 20.712 | P | 0.200 | -0.058 |
| ELFS | 2006 | 3 | 12 | 40 | 21.124 | P | 0.200 | 0.253  |
| MHC  | 2006 | 3 | 12 | 40 | 21.196 | P | 0.200 | 0.000  |
| M06C | 2006 | 3 | 12 | 40 | 21.232 | P | 0.200 | 0.034  |
| S04C | 2006 | 3 | 12 | 40 | 22.093 | P | 0.200 | -0.031 |
| R04C | 2006 | 3 | 12 | 40 | 22.200 | P | 0.200 | -0.448 |
| SAO  | 2006 | 3 | 12 | 40 | 22.370 | P | 0.200 | -0.084 |
| HAST | 2006 | 3 | 12 | 40 | 22.586 | P | 0.200 | 0.084  |
| LAVA | 2006 | 3 | 12 | 40 | 22.730 | P | 0.200 | -0.234 |
| P05C | 2006 | 3 | 12 | 40 | 22.997 | P | 0.200 | 0.015  |
| PACP | 2006 | 3 | 12 | 40 | 23.071 | P | 0.200 | 0.174  |
| SN71 | 2006 | 3 | 12 | 40 | 24.966 | P | 0.200 | -0.508 |
| CMB  | 2006 | 3 | 12 | 40 | 24.972 | P | 0.200 | -0.098 |
| T05C | 2006 | 3 | 12 | 40 | 25.796 | P | 0.200 | 0.469  |
| S05C | 2006 | 3 | 12 | 40 | 25.900 | P | 0.200 | -0.225 |
| R05C | 2006 | 3 | 12 | 40 | 25.920 | P | 0.200 | 0.177  |
| U04C | 2006 | 3 | 12 | 40 | 26.041 | P | 0.200 | 0.419  |
| SN73 | 2006 | 3 | 12 | 40 | 26.174 | P | 0.200 | -0.316 |
| SN85 | 2006 | 3 | 12 | 40 | 26.678 | P | 0.200 | -0.045 |
| SN62 | 2006 | 3 | 12 | 40 | 26.862 | P | 0.200 | -0.323 |
| PKD  | 2006 | 3 | 12 | 40 | 27.074 | P | 0.200 | 0.086  |
| S06C | 2006 | 3 | 12 | 40 | 27.308 | P | 0.200 | -0.210 |
| SN51 | 2006 | 3 | 12 | 40 | 27.356 | P | 0.200 | 0.165  |
| SN52 | 2006 | 3 | 12 | 40 | 27.683 | P | 0.200 | -0.431 |
| SN76 | 2006 | 3 | 12 | 40 | 28.502 | P | 0.200 | 0.173  |
| R06C | 2006 | 3 | 12 | 40 | 28.595 | P | 0.200 | 0.307  |
| T06C | 2006 | 3 | 12 | 40 | 28.691 | P | 0.200 | -0.243 |
| U05C | 2006 | 3 | 12 | 40 | 28.705 | P | 0.200 | 0.621  |
| SN54 | 2006 | 3 | 12 | 40 | 29.112 | P | 0.200 | -0.001 |
| SN21 | 2006 | 3 | 12 | 40 | 29.366 | P | 0.200 | -0.591 |
| SN43 | 2006 | 3 | 12 | 40 | 29.459 | P | 0.200 | -0.213 |
| SN55 | 2006 | 3 | 12 | 40 | 29.621 | P | 0.200 | -0.028 |
| V05C | 2006 | 3 | 12 | 40 | 30.110 | P | 0.200 | 0.678  |
| SN22 | 2006 | 3 | 12 | 40 | 30.120 | P | 0.200 | -0.320 |
| SN44 | 2006 | 3 | 12 | 40 | 30.284 | P | 0.200 | 0.061  |
| R07C | 2006 | 3 | 12 | 40 | 30.593 | P | 0.200 | 0.097  |
| SN23 | 2006 | 3 | 12 | 40 | 30.740 | P | 0.200 | -0.258 |
| SN57 | 2006 | 3 | 12 | 40 | 30.878 | P | 0.200 | 0.283  |
| SN45 | 2006 | 3 | 12 | 40 | 30.955 | P | 0.200 | 0.192  |
| RCT  | 2006 | 3 | 12 | 40 | 31.124 | P | 0.200 | -0.314 |
| SN34 | 2006 | 3 | 12 | 40 | 31.238 | P | 0.200 | -0.077 |
| MPP  | 2006 | 3 | 12 | 40 | 31.631 | P | 0.200 | 0.302  |
| HELL | 2006 | 3 | 12 | 40 | 31.710 | P | 0.200 | -0.411 |
| SN47 | 2006 | 3 | 12 | 40 | 31.820 | P | 0.200 | -0.019 |
| VES  | 2006 | 3 | 12 | 40 | 31.902 | P | 0.200 | -0.828 |
| SN48 | 2006 | 3 | 12 | 40 | 32.224 | P | 0.200 | 0.061  |
| SN36 | 2006 | 3 | 12 | 40 | 32.497 | P | 0.200 | 0.069  |
| SN37 | 2006 | 3 | 12 | 40 | 32.760 | P | 0.200 | 0.111  |

|      |      |   |    |    |        |   |       |        |
|------|------|---|----|----|--------|---|-------|--------|
| SN38 | 2006 | 3 | 12 | 40 | 32.988 | P | 0.200 | -0.067 |
| SN26 | 2006 | 3 | 12 | 40 | 33.233 | P | 0.200 | 0.192  |
| SN15 | 2006 | 3 | 12 | 40 | 33.377 | P | 0.200 | 0.263  |
| SN28 | 2006 | 3 | 12 | 40 | 34.160 | P | 0.200 | 0.311  |
| ARV  | 2006 | 3 | 12 | 40 | 34.407 | P | 0.200 | -0.197 |
| LGU  | 2006 | 3 | 12 | 40 | 34.495 | P | 0.200 | -0.527 |
| ISA  | 2006 | 3 | 12 | 40 | 34.757 | P | 0.200 | -0.593 |
| S08C | 2006 | 3 | 12 | 40 | 34.857 | P | 0.200 | 0.279  |
| TIN  | 2006 | 3 | 12 | 40 | 34.894 | P | 0.200 | 0.176  |
| OSI  | 2006 | 3 | 12 | 40 | 35.898 | P | 0.200 | 0.117  |
| DEC  | 2006 | 3 | 12 | 40 | 37.285 | P | 0.200 | -0.398 |
| CIA  | 2006 | 3 | 12 | 40 | 37.829 | P | 0.200 | -0.579 |
| GRA  | 2006 | 3 | 12 | 40 | 38.023 | P | 0.200 | 0.225  |
| EDW2 | 2006 | 3 | 12 | 40 | 38.445 | P | 0.200 | 0.303  |
| LRL  | 2006 | 3 | 12 | 40 | 38.817 | P | 0.200 | 0.114  |
| BFS  | 2006 | 3 | 12 | 40 | 39.911 | P | 0.200 | -0.425 |
| FUR  | 2006 | 3 | 12 | 40 | 40.540 | P | 0.200 | 0.351  |
| GSC  | 2006 | 3 | 12 | 40 | 42.248 | P | 0.200 | 0.139  |
| BBR  | 2006 | 3 | 12 | 40 | 42.902 | P | 0.200 | -0.443 |
| SHO  | 2006 | 3 | 12 | 40 | 43.225 | P | 0.200 | -0.055 |
| HEC  | 2006 | 3 | 12 | 40 | 44.450 | P | 0.200 | -0.044 |
| TUQ  | 2006 | 3 | 12 | 40 | 45.370 | P | 0.200 | 0.101  |

|      |      |     |    |         |          |           |         |        |       |
|------|------|-----|----|---------|----------|-----------|---------|--------|-------|
| 2005 | 354  | 5   | 51 | 13.1940 | 12.23200 | 140.99500 | 22.8000 | 49     | 0.001 |
| HUMO | 2005 | 354 | 6  | 3       | 53.399   | P         | 0.200   | 0.318  |       |
| YBH  | 2005 | 354 | 6  | 3       | 55.303   | P         | 0.200   | 0.293  |       |
| M02C | 2005 | 354 | 6  | 3       | 55.423   | P         | 0.200   | 0.579  |       |
| WDC  | 2005 | 354 | 6  | 3       | 56.961   | P         | 0.200   | 0.175  |       |
| M03C | 2005 | 354 | 6  | 3       | 57.564   | P         | 0.200   | -0.122 |       |
| M04C | 2005 | 354 | 6  | 3       | 58.123   | P         | 0.200   | 0.045  |       |
| HATC | 2005 | 354 | 6  | 4       | 0.470    | P         | 0.200   | -0.070 |       |
| SUTB | 2005 | 354 | 6  | 4       | 0.558    | P         | 0.200   | -0.572 |       |
| M05C | 2005 | 354 | 6  | 4       | 0.881    | P         | 0.200   | -0.163 |       |
| ORV  | 2005 | 354 | 6  | 4       | 1.298    | P         | 0.200   | -0.554 |       |
| O04C | 2005 | 354 | 6  | 4       | 2.562    | P         | 0.200   | 0.054  |       |
| Q04C | 2005 | 354 | 6  | 4       | 2.970    | P         | 0.200   | 0.033  |       |
| O05C | 2005 | 354 | 6  | 4       | 3.174    | P         | 0.200   | -0.138 |       |
| ELFS | 2005 | 354 | 6  | 4       | 3.656    | P         | 0.200   | 0.323  |       |
| M06C | 2005 | 354 | 6  | 4       | 3.718    | P         | 0.200   | 0.144  |       |
| MHC  | 2005 | 354 | 6  | 4       | 4.048    | P         | 0.200   | 0.006  |       |
| R04C | 2005 | 354 | 6  | 4       | 4.876    | P         | 0.200   | -0.376 |       |
| S04C | 2005 | 354 | 6  | 4       | 4.901    | P         | 0.200   | 0.022  |       |
| LAVA | 2005 | 354 | 6  | 4       | 5.236    | P         | 0.200   | -0.269 |       |
| HAST | 2005 | 354 | 6  | 4       | 5.333    | P         | 0.200   | 0.002  |       |
| P05C | 2005 | 354 | 6  | 4       | 5.398    | P         | 0.200   | -0.060 |       |
| SCZ  | 2005 | 354 | 6  | 4       | 5.684    | P         | 0.200   | 0.119  |       |
| PACP | 2005 | 354 | 6  | 4       | 5.879    | P         | 0.200   | 0.242  |       |
| SN71 | 2005 | 354 | 6  | 4       | 7.467    | P         | 0.200   | -0.492 |       |
| V03C | 2005 | 354 | 6  | 4       | 7.470    | P         | 0.200   | 0.624  |       |
| CMB  | 2005 | 354 | 6  | 4       | 7.506    | P         | 0.200   | -0.030 |       |
| R05C | 2005 | 354 | 6  | 4       | 8.300    | P         | 0.200   | 0.194  |       |
| S05C | 2005 | 354 | 6  | 4       | 8.390    | P         | 0.200   | -0.210 |       |
| SN73 | 2005 | 354 | 6  | 4       | 8.593    | P         | 0.200   | -0.301 |       |
| U04C | 2005 | 354 | 6  | 4       | 8.676    | P         | 0.200   | 0.447  |       |
| SN85 | 2005 | 354 | 6  | 4       | 8.991    | P         | 0.200   | -0.081 |       |
| SN74 | 2005 | 354 | 6  | 4       | 9.135    | P         | 0.200   | -0.354 |       |
| SN62 | 2005 | 354 | 6  | 4       | 9.161    | P         | 0.200   | -0.417 |       |
| V04C | 2005 | 354 | 6  | 4       | 9.168    | P         | 0.200   | 0.546  |       |
| RAMR | 2005 | 354 | 6  | 4       | 9.168    | P         | 0.200   | 0.549  |       |
| S06C | 2005 | 354 | 6  | 4       | 9.608    | P         | 0.200   | -0.253 |       |
| PKD  | 2005 | 354 | 6  | 4       | 9.655    | P         | 0.200   | 0.096  |       |
| SN86 | 2005 | 354 | 6  | 4       | 9.705    | P         | 0.200   | 0.270  |       |
| SN51 | 2005 | 354 | 6  | 4       | 9.779    | P         | 0.200   | 0.175  |       |

|      |      |     |   |   |        |   |       |        |
|------|------|-----|---|---|--------|---|-------|--------|
| SN52 | 2005 | 354 | 6 | 4 | 10.042 | P | 0.200 | -0.423 |
| SN75 | 2005 | 354 | 6 | 4 | 10.245 | P | 0.200 | -0.079 |
| PHL  | 2005 | 354 | 6 | 4 | 10.483 | P | 0.200 | 0.400  |
| SN53 | 2005 | 354 | 6 | 4 | 10.681 | P | 0.200 | -0.344 |
| SN76 | 2005 | 354 | 6 | 4 | 10.703 | P | 0.200 | 0.125  |
| R06C | 2005 | 354 | 6 | 4 | 10.824 | P | 0.200 | 0.314  |
| T06C | 2005 | 354 | 6 | 4 | 11.084 | P | 0.200 | -0.200 |
| U05C | 2005 | 354 | 6 | 4 | 11.219 | P | 0.200 | 0.683  |
| SN54 | 2005 | 354 | 6 | 4 | 11.334 | P | 0.200 | -0.053 |
| SN43 | 2005 | 354 | 6 | 4 | 11.735 | P | 0.200 | -0.210 |
| SN55 | 2005 | 354 | 6 | 4 | 11.744 | P | 0.200 | -0.124 |
| SN22 | 2005 | 354 | 6 | 4 | 12.380 | P | 0.200 | -0.317 |
| SN44 | 2005 | 354 | 6 | 4 | 12.408 | P | 0.200 | -0.031 |
| SN11 | 2005 | 354 | 6 | 4 | 12.491 | P | 0.200 | -0.527 |
| V05C | 2005 | 354 | 6 | 4 | 12.632 | P | 0.200 | 0.786  |
| R07C | 2005 | 354 | 6 | 4 | 12.791 | P | 0.200 | 0.145  |
| SMM  | 2005 | 354 | 6 | 4 | 12.815 | P | 0.200 | 0.422  |
| SN45 | 2005 | 354 | 6 | 4 | 12.977 | P | 0.200 | 0.050  |
| SN23 | 2005 | 354 | 6 | 4 | 13.012 | P | 0.200 | -0.208 |
| SN57 | 2005 | 354 | 6 | 4 | 13.105 | P | 0.200 | 0.398  |
| SN34 | 2005 | 354 | 6 | 4 | 13.316 | P | 0.200 | -0.180 |
| RCT  | 2005 | 354 | 6 | 4 | 13.329 | P | 0.200 | -0.352 |
| SN46 | 2005 | 354 | 6 | 4 | 13.690 | P | 0.200 | 0.114  |
| HELL | 2005 | 354 | 6 | 4 | 13.904 | P | 0.200 | -0.401 |
| SN47 | 2005 | 354 | 6 | 4 | 13.950 | P | 0.200 | 0.030  |
| MPP  | 2005 | 354 | 6 | 4 | 14.154 | P | 0.200 | 0.417  |
| MLAC | 2005 | 354 | 6 | 4 | 14.267 | P | 0.200 | 0.325  |
| SN48 | 2005 | 354 | 6 | 4 | 14.308 | P | 0.200 | 0.111  |
| SN36 | 2005 | 354 | 6 | 4 | 14.570 | P | 0.200 | 0.075  |
| SN37 | 2005 | 354 | 6 | 4 | 14.756 | P | 0.200 | 0.067  |
| SN25 | 2005 | 354 | 6 | 4 | 14.779 | P | 0.200 | -0.015 |
| SN14 | 2005 | 354 | 6 | 4 | 14.861 | P | 0.200 | 0.034  |
| SN38 | 2005 | 354 | 6 | 4 | 15.033 | P | 0.200 | -0.002 |
| SCZ2 | 2005 | 354 | 6 | 4 | 15.059 | P | 0.200 | -0.201 |
| SN26 | 2005 | 354 | 6 | 4 | 15.226 | P | 0.200 | 0.146  |
| MNV  | 2005 | 354 | 6 | 4 | 15.287 | P | 0.200 | 0.105  |
| SN15 | 2005 | 354 | 6 | 4 | 15.356 | P | 0.200 | 0.165  |
| BAK  | 2005 | 354 | 6 | 4 | 15.837 | P | 0.200 | 0.387  |
| VES  | 2005 | 354 | 6 | 4 | 15.886 | P | 0.200 | 0.929  |
| SN28 | 2005 | 354 | 6 | 4 | 16.120 | P | 0.200 | 0.311  |
| ARV  | 2005 | 354 | 6 | 4 | 16.760 | P | 0.200 | -0.029 |
| ISA  | 2005 | 354 | 6 | 4 | 16.822 | P | 0.200 | -0.638 |
| LGU  | 2005 | 354 | 6 | 4 | 16.875 | P | 0.200 | -0.432 |
| TIN  | 2005 | 354 | 6 | 4 | 16.955 | P | 0.200 | 0.225  |
| CWC  | 2005 | 354 | 6 | 4 | 17.936 | P | 0.200 | -0.159 |
| OSI  | 2005 | 354 | 6 | 4 | 17.948 | P | 0.200 | -0.037 |
| TOV  | 2005 | 354 | 6 | 4 | 17.971 | P | 0.200 | -0.178 |
| TPH  | 2005 | 354 | 6 | 4 | 18.955 | P | 0.200 | -0.042 |
| DJJ  | 2005 | 354 | 6 | 4 | 19.079 | P | 0.200 | -0.373 |
| DEC  | 2005 | 354 | 6 | 4 | 19.436 | P | 0.200 | -0.399 |
| PAS  | 2005 | 354 | 6 | 4 | 20.267 | P | 0.200 | -0.284 |
| EDW2 | 2005 | 354 | 6 | 4 | 20.419 | P | 0.200 | 0.205  |
| VCS  | 2005 | 354 | 6 | 4 | 20.431 | P | 0.200 | 0.060  |
| MPM  | 2005 | 354 | 6 | 4 | 20.749 | P | 0.200 | 0.029  |
| LRL  | 2005 | 354 | 6 | 4 | 20.767 | P | 0.200 | 0.068  |
| MWC  | 2005 | 354 | 6 | 4 | 20.884 | P | 0.200 | -0.236 |
| SLA  | 2005 | 354 | 6 | 4 | 21.806 | P | 0.200 | 0.212  |
| BFS  | 2005 | 354 | 6 | 4 | 21.877 | P | 0.200 | -0.528 |
| FUR  | 2005 | 354 | 6 | 4 | 22.280 | P | 0.200 | 0.260  |
| ADO  | 2005 | 354 | 6 | 4 | 22.887 | P | 0.200 | 0.044  |
| VTV  | 2005 | 354 | 6 | 4 | 22.902 | P | 0.200 | -0.174 |
| RRX  | 2005 | 354 | 6 | 4 | 23.940 | P | 0.200 | 0.164  |
| TPNV | 2005 | 354 | 6 | 4 | 23.988 | P | 0.200 | 0.082  |

|      |      |     |    |         |          |           |          |            |
|------|------|-----|----|---------|----------|-----------|----------|------------|
| GSC  | 2005 | 354 | 6  | 4       | 24.056   | P         | 0.200    | 0.034      |
| SVD  | 2005 | 354 | 6  | 4       | 24.096   | P         | 0.200    | -0.531     |
| BBR  | 2005 | 354 | 6  | 4       | 24.684   | P         | 0.200    | -0.646     |
| SHO  | 2005 | 354 | 6  | 4       | 24.989   | P         | 0.200    | -0.107     |
| HEC  | 2005 | 354 | 6  | 4       | 26.188   | P         | 0.200    | -0.207     |
| TUQ  | 2005 | 354 | 6  | 4       | 27.028   | P         | 0.200    | -0.052     |
|      |      |     |    |         |          |           |          |            |
| 2006 | 48   | 2   | 13 | 30.4763 | 24.02100 | 141.48900 | 160.5000 | 113 -0.008 |
| I03A | 2006 | 48  | 2  | 25      | 7.739    | P         | 0.200    | 0.539      |
| J02A | 2006 | 48  | 2  | 25      | 7.838    | P         | 0.200    | 0.429      |
| DBO  | 2006 | 48  | 2  | 25      | 9.532    | P         | 0.200    | 0.279      |
| HUMO | 2006 | 48  | 2  | 25      | 11.703   | P         | 0.200    | 0.459      |
| O01C | 2006 | 48  | 2  | 25      | 13.580   | P         | 0.200    | 0.750      |
| N02C | 2006 | 48  | 2  | 25      | 13.845   | P         | 0.200    | 0.334      |
| YBH  | 2006 | 48  | 2  | 25      | 14.419   | P         | 0.200    | 0.389      |
| M02C | 2006 | 48  | 2  | 25      | 14.818   | P         | 0.200    | 0.674      |
| P01C | 2006 | 48  | 2  | 25      | 16.224   | P         | 0.200    | 0.099      |
| WDC  | 2006 | 48  | 2  | 25      | 17.128   | P         | 0.200    | 0.228      |
| M03C | 2006 | 48  | 2  | 25      | 17.191   | P         | 0.200    | -0.073     |
| M04C | 2006 | 48  | 2  | 25      | 17.452   | P         | 0.200    | 0.159      |
| O02C | 2006 | 48  | 2  | 25      | 17.507   | P         | 0.200    | 0.533      |
| HOPS | 2006 | 48  | 2  | 25      | 18.232   | P         | 0.200    | -0.058     |
| GASB | 2006 | 48  | 2  | 25      | 19.109   | P         | 0.200    | 0.687      |
| O03C | 2006 | 48  | 2  | 25      | 19.829   | P         | 0.200    | -0.297     |
| FARB | 2006 | 48  | 2  | 25      | 20.721   | P         | 0.200    | -0.287     |
| M05C | 2006 | 48  | 2  | 25      | 20.779   | P         | 0.200    | 0.002      |
| HATC | 2006 | 48  | 2  | 25      | 20.786   | P         | 0.200    | 0.090      |
| MNRC | 2006 | 48  | 2  | 25      | 21.366   | P         | 0.200    | 0.318      |
| CVS  | 2006 | 48  | 2  | 25      | 21.659   | P         | 0.200    | -0.285     |
| SUTB | 2006 | 48  | 2  | 25      | 22.117   | P         | 0.200    | -0.550     |
| ORV  | 2006 | 48  | 2  | 25      | 22.577   | P         | 0.200    | -0.596     |
| O04C | 2006 | 48  | 2  | 25      | 23.337   | P         | 0.200    | 0.091      |
| BRK  | 2006 | 48  | 2  | 25      | 23.455   | P         | 0.200    | -0.234     |
| BKS  | 2006 | 48  | 2  | 25      | 23.698   | P         | 0.200    | -0.021     |
| M06C | 2006 | 48  | 2  | 25      | 23.737   | P         | 0.200    | 0.073      |
| BRIB | 2006 | 48  | 2  | 25      | 23.836   | P         | 0.200    | -0.052     |
| Q03C | 2006 | 48  | 2  | 25      | 23.881   | P         | 0.200    | 0.875      |
| ELFS | 2006 | 48  | 2  | 25      | 24.198   | P         | 0.200    | 0.311      |
| O05C | 2006 | 48  | 2  | 25      | 24.424   | P         | 0.200    | -0.017     |
| JRSC | 2006 | 48  | 2  | 25      | 24.468   | P         | 0.200    | -0.306     |
| Q04C | 2006 | 48  | 2  | 25      | 24.947   | P         | 0.200    | -0.029     |
| BDM  | 2006 | 48  | 2  | 25      | 24.972   | P         | 0.200    | -0.051     |
| BNLO | 2006 | 48  | 2  | 25      | 25.391   | P         | 0.200    | -0.193     |
| WENL | 2006 | 48  | 2  | 25      | 26.185   | P         | 0.200    | -0.003     |
| BEK  | 2006 | 48  | 2  | 25      | 26.569   | P         | 0.200    | -0.462     |
| P05C | 2006 | 48  | 2  | 25      | 27.083   | P         | 0.200    | -0.152     |
| MHC  | 2006 | 48  | 2  | 25      | 27.364   | P         | 0.200    | -0.022     |
| LAVA | 2006 | 48  | 2  | 25      | 27.445   | P         | 0.200    | -0.335     |
| R04C | 2006 | 48  | 2  | 25      | 27.501   | P         | 0.200    | -0.397     |
| S04C | 2006 | 48  | 2  | 25      | 28.136   | P         | 0.200    | -0.022     |
| SAO  | 2006 | 48  | 2  | 25      | 29.031   | P         | 0.200    | -0.138     |
| PACP | 2006 | 48  | 2  | 25      | 29.488   | P         | 0.200    | 0.117      |
| HAST | 2006 | 48  | 2  | 25      | 29.563   | P         | 0.200    | -0.048     |
| CMB  | 2006 | 48  | 2  | 25      | 30.409   | P         | 0.200    | -0.132     |
| R05C | 2006 | 48  | 2  | 25      | 30.606   | P         | 0.200    | 0.043      |
| SN71 | 2006 | 48  | 2  | 25      | 30.677   | P         | 0.200    | -0.658     |
| SN73 | 2006 | 48  | 2  | 25      | 31.746   | P         | 0.200    | -0.408     |
| SN85 | 2006 | 48  | 2  | 25      | 31.856   | P         | 0.200    | -0.092     |
| V03C | 2006 | 48  | 2  | 25      | 32.061   | P         | 0.200    | 0.560      |
| T05C | 2006 | 48  | 2  | 25      | 32.432   | P         | 0.200    | 0.546      |
| SN62 | 2006 | 48  | 2  | 25      | 32.551   | P         | 0.200    | -0.508     |
| S06C | 2006 | 48  | 2  | 25      | 32.761   | P         | 0.200    | -0.330     |
| U04C | 2006 | 48  | 2  | 25      | 33.090   | P         | 0.200    | 0.430      |

|      |      |    |   |    |        |   |       |        |
|------|------|----|---|----|--------|---|-------|--------|
| SN51 | 2006 | 48 | 2 | 25 | 33.464 | P | 0.200 | 0.083  |
| R06C | 2006 | 48 | 2 | 25 | 33.474 | P | 0.200 | 0.202  |
| SN76 | 2006 | 48 | 2 | 25 | 33.536 | P | 0.200 | 0.090  |
| SN52 | 2006 | 48 | 2 | 25 | 33.742 | P | 0.200 | -0.455 |
| SN53 | 2006 | 48 | 2 | 25 | 34.251 | P | 0.200 | -0.391 |
| V04C | 2006 | 48 | 2 | 25 | 34.289 | P | 0.200 | 0.582  |
| PKD  | 2006 | 48 | 2 | 25 | 34.500 | P | 0.200 | 0.051  |
| SN54 | 2006 | 48 | 2 | 25 | 34.684 | P | 0.200 | -0.146 |
| SN55 | 2006 | 48 | 2 | 25 | 35.047 | P | 0.200 | -0.144 |
| T06C | 2006 | 48 | 2 | 25 | 35.058 | P | 0.200 | -0.262 |
| U05C | 2006 | 48 | 2 | 25 | 35.781 | P | 0.200 | 0.694  |
| R07C | 2006 | 48 | 2 | 25 | 35.857 | P | 0.200 | 0.019  |
| SN21 | 2006 | 48 | 2 | 25 | 35.945 | P | 0.200 | -0.559 |
| SN44 | 2006 | 48 | 2 | 25 | 36.062 | P | 0.200 | -0.047 |
| SN57 | 2006 | 48 | 2 | 25 | 36.136 | P | 0.200 | 0.300  |
| SN22 | 2006 | 48 | 2 | 25 | 36.461 | P | 0.200 | -0.329 |
| SN23 | 2006 | 48 | 2 | 25 | 36.965 | P | 0.200 | -0.268 |
| SN34 | 2006 | 48 | 2 | 25 | 37.054 | P | 0.200 | -0.250 |
| SN46 | 2006 | 48 | 2 | 25 | 37.154 | P | 0.200 | 0.106  |
| SN47 | 2006 | 48 | 2 | 25 | 37.267 | P | 0.200 | 0.017  |
| BMN  | 2006 | 48 | 2 | 25 | 37.307 | P | 0.200 | 0.128  |
| SN48 | 2006 | 48 | 2 | 25 | 37.485 | P | 0.200 | 0.086  |
| V05C | 2006 | 48 | 2 | 25 | 37.608 | P | 0.200 | 0.727  |
| SN36 | 2006 | 48 | 2 | 25 | 38.164 | P | 0.200 | 0.078  |
| MNV  | 2006 | 48 | 2 | 25 | 38.196 | P | 0.200 | -0.030 |
| SN37 | 2006 | 48 | 2 | 25 | 38.247 | P | 0.200 | 0.041  |
| HELL | 2006 | 48 | 2 | 25 | 38.283 | P | 0.200 | -0.470 |
| SN38 | 2006 | 48 | 2 | 25 | 38.296 | P | 0.200 | -0.064 |
| SMM  | 2006 | 48 | 2 | 25 | 38.330 | P | 0.200 | 0.424  |
| SN25 | 2006 | 48 | 2 | 25 | 38.702 | P | 0.200 | 0.015  |
| SN26 | 2006 | 48 | 2 | 25 | 38.943 | P | 0.200 | 0.151  |
| SN15 | 2006 | 48 | 2 | 25 | 39.266 | P | 0.200 | 0.081  |
| VES  | 2006 | 48 | 2 | 25 | 39.406 | P | 0.200 | -0.757 |
| SN28 | 2006 | 48 | 2 | 25 | 39.450 | P | 0.200 | 0.155  |
| MPP  | 2006 | 48 | 2 | 25 | 39.982 | P | 0.200 | 0.331  |
| SN16 | 2006 | 48 | 2 | 25 | 40.428 | P | 0.200 | 0.181  |
| S08C | 2006 | 48 | 2 | 25 | 40.513 | P | 0.200 | 0.136  |
| TIN  | 2006 | 48 | 2 | 25 | 41.064 | P | 0.200 | 0.102  |
| ISA  | 2006 | 48 | 2 | 25 | 42.072 | P | 0.200 | -0.773 |
| ARV  | 2006 | 48 | 2 | 25 | 42.395 | P | 0.200 | -0.215 |
| TPH  | 2006 | 48 | 2 | 25 | 42.401 | P | 0.200 | -0.054 |
| CWC  | 2006 | 48 | 2 | 25 | 42.649 | P | 0.200 | -0.206 |
| LGU  | 2006 | 48 | 2 | 25 | 43.438 | P | 0.200 | -0.576 |
| GRA  | 2006 | 48 | 2 | 25 | 44.298 | P | 0.200 | 0.282  |
| OSI  | 2006 | 48 | 2 | 25 | 44.395 | P | 0.200 | 0.140  |
| MPM  | 2006 | 48 | 2 | 25 | 45.899 | P | 0.200 | 0.020  |
| DEC  | 2006 | 48 | 2 | 25 | 46.031 | P | 0.200 | -0.431 |
| LRL  | 2006 | 48 | 2 | 25 | 46.249 | P | 0.200 | -0.055 |
| EDW2 | 2006 | 48 | 2 | 25 | 46.544 | P | 0.200 | 0.258  |
| FUR  | 2006 | 48 | 2 | 25 | 47.080 | P | 0.200 | 0.235  |
| CIA  | 2006 | 48 | 2 | 25 | 47.359 | P | 0.200 | -0.606 |
| BFS  | 2006 | 48 | 2 | 25 | 48.675 | P | 0.200 | -0.409 |
| GSC  | 2006 | 48 | 2 | 25 | 49.891 | P | 0.200 | 0.061  |
| RRX  | 2006 | 48 | 2 | 25 | 50.226 | P | 0.200 | 0.284  |
| SHO  | 2006 | 48 | 2 | 25 | 50.245 | P | 0.200 | -0.193 |
| BBR  | 2006 | 48 | 2 | 25 | 51.489 | P | 0.200 | -0.530 |
| HEC  | 2006 | 48 | 2 | 25 | 52.532 | P | 0.200 | -0.098 |
| TUQ  | 2006 | 48 | 2 | 25 | 52.779 | P | 0.200 | -0.003 |

|      |      |     |    |         |          |           |         |       |
|------|------|-----|----|---------|----------|-----------|---------|-------|
| 2005 | 334  | 4   | 54 | 27.6633 | 13.95300 | 146.25301 | 10.0000 |       |
| O01C | 2005 | 334 | 5  | 6       | 44.169   | P         | 0.200   | 0.912 |
| HUMO | 2005 | 334 | 5  | 6       | 44.744   | P         | 0.200   | 0.489 |
| N02C | 2005 | 334 | 5  | 6       | 45.129   | P         | 0.200   | 0.449 |

|      |      |     |   |   |        |   |       |        |
|------|------|-----|---|---|--------|---|-------|--------|
| P01C | 2005 | 334 | 5 | 6 | 46.172 | P | 0.200 | 0.243  |
| M02C | 2005 | 334 | 5 | 6 | 46.572 | P | 0.200 | 0.627  |
| YBH  | 2005 | 334 | 5 | 6 | 46.631 | P | 0.200 | 0.446  |
| WDC  | 2005 | 334 | 5 | 6 | 48.281 | P | 0.200 | 0.368  |
| M03C | 2005 | 334 | 5 | 6 | 49.031 | P | 0.200 | 0.032  |
| GASB | 2005 | 334 | 5 | 6 | 49.257 | P | 0.200 | 0.795  |
| M04C | 2005 | 334 | 5 | 6 | 49.729 | P | 0.200 | 0.191  |
| O03C | 2005 | 334 | 5 | 6 | 50.590 | P | 0.200 | 0.026  |
| CVS  | 2005 | 334 | 5 | 6 | 50.617 | P | 0.200 | -0.108 |
| MNRC | 2005 | 334 | 5 | 6 | 50.761 | P | 0.200 | 0.421  |
| BRK  | 2005 | 334 | 5 | 6 | 51.915 | P | 0.200 | -0.089 |
| SUTB | 2005 | 334 | 5 | 6 | 52.034 | P | 0.200 | -0.369 |
| BKS  | 2005 | 334 | 5 | 6 | 52.114 | P | 0.200 | 0.052  |
| HATC | 2005 | 334 | 5 | 6 | 52.170 | P | 0.200 | 0.128  |
| M05C | 2005 | 334 | 5 | 6 | 52.683 | P | 0.200 | 0.017  |
| ORV  | 2005 | 334 | 5 | 6 | 52.898 | P | 0.200 | -0.341 |
| BNLO | 2005 | 334 | 5 | 6 | 52.974 | P | 0.200 | -0.200 |
| BDM  | 2005 | 334 | 5 | 6 | 53.510 | P | 0.200 | 0.057  |
| O04C | 2005 | 334 | 5 | 6 | 54.310 | P | 0.200 | 0.203  |
| WENL | 2005 | 334 | 5 | 6 | 54.458 | P | 0.200 | 0.143  |
| Q04C | 2005 | 334 | 5 | 6 | 54.470 | P | 0.200 | 0.125  |
| O05C | 2005 | 334 | 5 | 6 | 54.908 | P | 0.200 | -0.041 |
| MHC  | 2005 | 334 | 5 | 6 | 55.225 | P | 0.200 | -0.031 |
| ELFS | 2005 | 334 | 5 | 6 | 55.500 | P | 0.200 | 0.415  |
| M06C | 2005 | 334 | 5 | 6 | 55.542 | P | 0.200 | 0.099  |
| S04C | 2005 | 334 | 5 | 6 | 56.299 | P | 0.200 | 0.091  |
| R04C | 2005 | 334 | 5 | 6 | 56.351 | P | 0.200 | -0.441 |
| SAO  | 2005 | 334 | 5 | 6 | 56.408 | P | 0.200 | -0.116 |
| HAST | 2005 | 334 | 5 | 6 | 56.600 | P | 0.200 | 0.051  |
| LAVA | 2005 | 334 | 5 | 6 | 56.907 | P | 0.200 | -0.223 |
| PACP | 2005 | 334 | 5 | 6 | 57.168 | P | 0.200 | 0.183  |
| SCZ  | 2005 | 334 | 5 | 6 | 57.213 | P | 0.200 | 0.362  |
| V03C | 2005 | 334 | 5 | 6 | 58.735 | P | 0.200 | 0.553  |
| SN71 | 2005 | 334 | 5 | 6 | 59.091 | P | 0.200 | -0.546 |
| CMB  | 2005 | 334 | 5 | 6 | 59.157 | P | 0.200 | -0.089 |
| SN95 | 2005 | 334 | 5 | 6 | 59.534 | P | 0.200 | -0.067 |
| T05C | 2005 | 334 | 5 | 6 | 59.935 | P | 0.200 | 0.478  |
| R05C | 2005 | 334 | 5 | 7 | 0.042  | P | 0.200 | 0.085  |
| S05C | 2005 | 334 | 5 | 7 | 0.073  | P | 0.200 | -0.219 |
| U04C | 2005 | 334 | 5 | 7 | 0.211  | P | 0.200 | 0.478  |
| SN73 | 2005 | 334 | 5 | 7 | 0.223  | P | 0.200 | -0.454 |
| V04C | 2005 | 334 | 5 | 7 | 0.594  | P | 0.200 | 0.534  |
| RAMR | 2005 | 334 | 5 | 7 | 0.594  | P | 0.200 | 0.537  |
| SN85 | 2005 | 334 | 5 | 7 | 0.948  | P | 0.200 | 0.018  |
| SN62 | 2005 | 334 | 5 | 7 | 0.963  | P | 0.200 | -0.416 |
| PKD  | 2005 | 334 | 5 | 7 | 1.152  | P | 0.200 | 0.044  |
| S06C | 2005 | 334 | 5 | 7 | 1.376  | P | 0.200 | -0.351 |
| SN51 | 2005 | 334 | 5 | 7 | 1.495  | P | 0.200 | 0.121  |
| SN86 | 2005 | 334 | 5 | 7 | 1.522  | P | 0.200 | 0.168  |
| SN52 | 2005 | 334 | 5 | 7 | 1.890  | P | 0.200 | -0.419 |
| PHL  | 2005 | 334 | 5 | 7 | 2.257  | P | 0.200 | 0.647  |
| SN75 | 2005 | 334 | 5 | 7 | 2.425  | P | 0.200 | 0.183  |
| SN64 | 2005 | 334 | 5 | 7 | 2.577  | P | 0.200 | -0.163 |
| SN53 | 2005 | 334 | 5 | 7 | 2.583  | P | 0.200 | -0.334 |
| SN76 | 2005 | 334 | 5 | 7 | 2.704  | P | 0.200 | 0.131  |
| T06C | 2005 | 334 | 5 | 7 | 2.798  | P | 0.200 | -0.334 |
| R06C | 2005 | 334 | 5 | 7 | 2.805  | P | 0.200 | 0.271  |
| U05C | 2005 | 334 | 5 | 7 | 2.870  | P | 0.200 | 0.631  |
| SN54 | 2005 | 334 | 5 | 7 | 3.299  | P | 0.200 | -0.042 |
| SN43 | 2005 | 334 | 5 | 7 | 3.590  | P | 0.200 | -0.298 |
| V05C | 2005 | 334 | 5 | 7 | 4.230  | P | 0.200 | 0.634  |
| SN22 | 2005 | 334 | 5 | 7 | 4.251  | P | 0.200 | -0.408 |
| SN44 | 2005 | 334 | 5 | 7 | 4.331  | P | 0.200 | -0.128 |



|      |      |     |   |   |        |   |       |        |
|------|------|-----|---|---|--------|---|-------|--------|
| SMM  | 2005 | 334 | 5 | 7 | 4.360  | P | 0.200 | 0.280  |
| SN11 | 2005 | 334 | 5 | 7 | 4.410  | P | 0.200 | -0.591 |
| SN56 | 2005 | 334 | 5 | 7 | 4.487  | P | 0.200 | -0.055 |
| R07C | 2005 | 334 | 5 | 7 | 4.818  | P | 0.200 | 0.061  |
| SN23 | 2005 | 334 | 5 | 7 | 4.832  | P | 0.200 | -0.396 |
| SN45 | 2005 | 334 | 5 | 7 | 4.969  | P | 0.200 | -0.047 |
| SN57 | 2005 | 334 | 5 | 7 | 5.160  | P | 0.200 | 0.296  |
| RCT  | 2005 | 334 | 5 | 7 | 5.197  | P | 0.200 | -0.454 |
| SN34 | 2005 | 334 | 5 | 7 | 5.296  | P | 0.200 | -0.263 |
| MPP  | 2005 | 334 | 5 | 7 | 5.637  | P | 0.200 | 0.158  |
| HELL | 2005 | 334 | 5 | 7 | 5.756  | P | 0.200 | -0.598 |
| SN46 | 2005 | 334 | 5 | 7 | 5.892  | P | 0.200 | 0.182  |
| SN47 | 2005 | 334 | 5 | 7 | 6.113  | P | 0.200 | -0.007 |
| VES  | 2005 | 334 | 5 | 7 | 6.176  | P | 0.200 | -0.767 |
| SN48 | 2005 | 334 | 5 | 7 | 6.383  | P | 0.200 | -0.080 |
| MLAC | 2005 | 334 | 5 | 7 | 6.628  | P | 0.200 | 0.528  |
| SN36 | 2005 | 334 | 5 | 7 | 6.738  | P | 0.200 | 0.025  |
| SN37 | 2005 | 334 | 5 | 7 | 6.962  | P | 0.200 | 0.021  |
| SN38 | 2005 | 334 | 5 | 7 | 7.207  | P | 0.200 | -0.166 |
| SN14 | 2005 | 334 | 5 | 7 | 7.210  | P | 0.200 | 0.234  |
| SN15 | 2005 | 334 | 5 | 7 | 7.463  | P | 0.200 | 0.068  |
| SN26 | 2005 | 334 | 5 | 7 | 7.482  | P | 0.200 | 0.144  |
| MNV  | 2005 | 334 | 5 | 7 | 7.543  | P | 0.200 | -0.043 |
| BAK  | 2005 | 334 | 5 | 7 | 7.897  | P | 0.200 | 0.488  |
| SN28 | 2005 | 334 | 5 | 7 | 8.389  | P | 0.200 | 0.214  |
| ARV  | 2005 | 334 | 5 | 7 | 8.586  | P | 0.200 | -0.240 |
| ISA  | 2005 | 334 | 5 | 7 | 8.871  | P | 0.200 | -0.732 |
| TIN  | 2005 | 334 | 5 | 7 | 9.100  | P | 0.200 | 0.087  |
| CWC  | 2005 | 334 | 5 | 7 | 10.033 | P | 0.200 | -0.340 |
| DEC  | 2005 | 334 | 5 | 7 | 11.249 | P | 0.200 | -0.695 |
| DJJ  | 2005 | 334 | 5 | 7 | 11.255 | P | 0.200 | -0.265 |
| TPH  | 2005 | 334 | 5 | 7 | 11.380 | P | 0.200 | -0.237 |
| CIA  | 2005 | 334 | 5 | 7 | 11.882 | P | 0.200 | -0.776 |
| GRA  | 2005 | 334 | 5 | 7 | 12.255 | P | 0.200 | 0.075  |
| EDW2 | 2005 | 334 | 5 | 7 | 12.449 | P | 0.200 | 0.005  |
| PAS  | 2005 | 334 | 5 | 7 | 12.516 | P | 0.200 | -0.177 |
| VCS  | 2005 | 334 | 5 | 7 | 12.710 | P | 0.200 | 0.170  |
| LRL  | 2005 | 334 | 5 | 7 | 12.957 | P | 0.200 | -0.082 |
| MPM  | 2005 | 334 | 5 | 7 | 13.071 | P | 0.200 | -0.062 |
| CHF  | 2005 | 334 | 5 | 7 | 13.154 | P | 0.200 | -0.015 |
| MWC  | 2005 | 334 | 5 | 7 | 13.164 | P | 0.200 | -0.122 |
| BFS  | 2005 | 334 | 5 | 7 | 13.999 | P | 0.200 | -0.672 |
| SLA  | 2005 | 334 | 5 | 7 | 14.414 | P | 0.200 | 0.380  |
| FUR  | 2005 | 334 | 5 | 7 | 14.721 | P | 0.200 | 0.103  |
| VTV  | 2005 | 334 | 5 | 7 | 15.463 | P | 0.200 | 0.032  |
| GSC  | 2005 | 334 | 5 | 7 | 16.469 | P | 0.200 | -0.055 |
| TPNV | 2005 | 334 | 5 | 7 | 16.537 | P | 0.200 | -0.110 |
| SVD  | 2005 | 334 | 5 | 7 | 16.668 | P | 0.200 | -0.314 |
| BBR  | 2005 | 334 | 5 | 7 | 16.997 | P | 0.200 | -0.732 |
| SHO  | 2005 | 334 | 5 | 7 | 17.489 | P | 0.200 | -0.242 |
| HEC  | 2005 | 334 | 5 | 7 | 18.586 | P | 0.200 | -0.335 |
| TUQ  | 2005 | 334 | 5 | 7 | 19.639 | P | 0.200 | -0.093 |

|      |      |     |    |         |          |           |         |       |  |
|------|------|-----|----|---------|----------|-----------|---------|-------|--|
| 2005 | 332  | 16  | 41 | 31.7567 | 20.28800 | 146.03700 | 41.0000 |       |  |
| TAKO | 2005 | 332 | 16 | 53      | 16.419   | P         | 0.200   | 0.745 |  |
| I03A | 2005 | 332 | 16 | 53      | 19.059   | P         | 0.200   | 0.533 |  |
| JCC  | 2005 | 332 | 16 | 53      | 21.088   | P         | 0.200   | 0.797 |  |
| HUMO | 2005 | 332 | 16 | 53      | 22.396   | P         | 0.200   | 0.442 |  |
| O01C | 2005 | 332 | 16 | 53      | 23.034   | P         | 0.200   | 0.868 |  |
| YBH  | 2005 | 332 | 16 | 53      | 24.930   | P         | 0.200   | 0.552 |  |
| M02C | 2005 | 332 | 16 | 53      | 25.084   | P         | 0.200   | 0.786 |  |
| P01C | 2005 | 332 | 16 | 53      | 25.510   | P         | 0.200   | 0.257 |  |
| WDC  | 2005 | 332 | 16 | 53      | 26.966   | P         | 0.200   | 0.239 |  |

|      |      |     |    |    |        |   |       |        |
|------|------|-----|----|----|--------|---|-------|--------|
| HOPS | 2005 | 332 | 16 | 53 | 27.252 | P | 0.200 | 0.009  |
| M03C | 2005 | 332 | 16 | 53 | 27.549 | P | 0.200 | 0.045  |
| M04C | 2005 | 332 | 16 | 53 | 28.063 | P | 0.200 | 0.227  |
| GASB | 2005 | 332 | 16 | 53 | 28.469 | P | 0.200 | 0.694  |
| FARB | 2005 | 332 | 16 | 53 | 28.954 | P | 0.200 | -0.453 |
| O03C | 2005 | 332 | 16 | 53 | 29.700 | P | 0.200 | -0.088 |
| CVS  | 2005 | 332 | 16 | 53 | 30.417 | P | 0.200 | -0.328 |
| MNRC | 2005 | 332 | 16 | 53 | 30.424 | P | 0.200 | 0.329  |
| HATC | 2005 | 332 | 16 | 53 | 31.014 | P | 0.200 | 0.144  |
| M05C | 2005 | 332 | 16 | 53 | 31.329 | P | 0.200 | 0.078  |
| SUTB | 2005 | 332 | 16 | 53 | 31.534 | P | 0.200 | -0.496 |
| BRK  | 2005 | 332 | 16 | 53 | 32.142 | P | 0.200 | -0.164 |
| ORV  | 2005 | 332 | 16 | 53 | 32.258 | P | 0.200 | -0.482 |
| BKS  | 2005 | 332 | 16 | 53 | 32.343 | P | 0.200 | -0.017 |
| BRIB | 2005 | 332 | 16 | 53 | 32.619 | P | 0.200 | 0.051  |
| Q03C | 2005 | 332 | 16 | 53 | 32.822 | P | 0.200 | 0.784  |
| JRSC | 2005 | 332 | 16 | 53 | 32.847 | P | 0.200 | -0.347 |
| O04C | 2005 | 332 | 16 | 53 | 33.362 | P | 0.200 | 0.095  |
| BNLO | 2005 | 332 | 16 | 53 | 33.564 | P | 0.200 | -0.340 |
| BDM  | 2005 | 332 | 16 | 53 | 33.738 | P | 0.200 | -0.044 |
| Q04C | 2005 | 332 | 16 | 53 | 34.277 | P | 0.200 | 0.027  |
| M06C | 2005 | 332 | 16 | 53 | 34.353 | P | 0.200 | 0.141  |
| O05C | 2005 | 332 | 16 | 53 | 34.370 | P | 0.200 | 0.050  |
| ELFS | 2005 | 332 | 16 | 53 | 34.538 | P | 0.200 | 0.416  |
| WENL | 2005 | 332 | 16 | 53 | 34.926 | P | 0.200 | 0.101  |
| MHC  | 2005 | 332 | 16 | 53 | 35.857 | P | 0.200 | -0.063 |
| R04C | 2005 | 332 | 16 | 53 | 36.669 | P | 0.200 | -0.367 |
| S04C | 2005 | 332 | 16 | 53 | 36.827 | P | 0.200 | -0.005 |
| P05C | 2005 | 332 | 16 | 53 | 36.896 | P | 0.200 | -0.004 |
| LAVA | 2005 | 332 | 16 | 53 | 36.932 | P | 0.200 | -0.222 |
| SAO  | 2005 | 332 | 16 | 53 | 37.373 | P | 0.200 | -0.136 |
| HAST | 2005 | 332 | 16 | 53 | 37.658 | P | 0.200 | -0.094 |
| PACP | 2005 | 332 | 16 | 53 | 38.018 | P | 0.200 | 0.158  |
| CMB  | 2005 | 332 | 16 | 53 | 39.655 | P | 0.200 | -0.027 |
| SN71 | 2005 | 332 | 16 | 53 | 39.796 | P | 0.200 | -0.490 |
| SN95 | 2005 | 332 | 16 | 53 | 39.888 | P | 0.200 | 0.003  |
| V03C | 2005 | 332 | 16 | 53 | 40.023 | P | 0.200 | 0.445  |
| R05C | 2005 | 332 | 16 | 53 | 40.270 | P | 0.200 | 0.194  |
| S05C | 2005 | 332 | 16 | 53 | 40.745 | P | 0.200 | -0.340 |
| T05C | 2005 | 332 | 16 | 53 | 40.911 | P | 0.200 | 0.459  |
| SN73 | 2005 | 332 | 16 | 53 | 40.914 | P | 0.200 | -0.347 |
| SN85 | 2005 | 332 | 16 | 53 | 41.212 | P | 0.200 | -0.078 |
| U04C | 2005 | 332 | 16 | 53 | 41.362 | P | 0.200 | 0.369  |
| SN62 | 2005 | 332 | 16 | 53 | 41.591 | P | 0.200 | -0.496 |
| SN86 | 2005 | 332 | 16 | 53 | 41.793 | P | 0.200 | 0.180  |
| S06C | 2005 | 332 | 16 | 53 | 41.965 | P | 0.200 | -0.320 |
| V04C | 2005 | 332 | 16 | 53 | 42.127 | P | 0.200 | 0.425  |
| RAMR | 2005 | 332 | 16 | 53 | 42.127 | P | 0.200 | 0.428  |
| SN51 | 2005 | 332 | 16 | 53 | 42.396 | P | 0.200 | 0.138  |
| PKD  | 2005 | 332 | 16 | 53 | 42.652 | P | 0.200 | 0.008  |
| SN52 | 2005 | 332 | 16 | 53 | 42.820 | P | 0.200 | -0.357 |
| SN76 | 2005 | 332 | 16 | 53 | 43.128 | P | 0.200 | 0.200  |
| SN64 | 2005 | 332 | 16 | 53 | 43.148 | P | 0.200 | -0.207 |
| R06C | 2005 | 332 | 16 | 53 | 43.150 | P | 0.200 | 0.319  |
| SN53 | 2005 | 332 | 16 | 53 | 43.337 | P | 0.200 | -0.377 |
| SN54 | 2005 | 332 | 16 | 53 | 43.954 | P | 0.200 | -0.083 |
| T06C | 2005 | 332 | 16 | 53 | 43.968 | P | 0.200 | -0.208 |
| SN66 | 2005 | 332 | 16 | 53 | 44.071 | P | 0.200 | 0.051  |
| U05C | 2005 | 332 | 16 | 53 | 44.204 | P | 0.200 | 0.617  |
| SN43 | 2005 | 332 | 16 | 53 | 44.519 | P | 0.200 | -0.243 |
| SN55 | 2005 | 332 | 16 | 53 | 44.521 | P | 0.200 | 0.001  |
| SDP  | 2005 | 332 | 16 | 53 | 44.957 | P | 0.200 | -0.311 |
| SN56 | 2005 | 332 | 16 | 53 | 45.204 | P | 0.200 | 0.053  |

|      |      |     |    |    |        |   |       |        |
|------|------|-----|----|----|--------|---|-------|--------|
| SN44 | 2005 | 332 | 16 | 53 | 45.335 | P | 0.200 | 0.044  |
| SN22 | 2005 | 332 | 16 | 53 | 45.356 | P | 0.200 | -0.388 |
| R07C | 2005 | 332 | 16 | 53 | 45.388 | P | 0.200 | 0.078  |
| SN11 | 2005 | 332 | 16 | 53 | 45.635 | P | 0.200 | -0.604 |
| SN57 | 2005 | 332 | 16 | 53 | 45.660 | P | 0.200 | 0.277  |
| V05C | 2005 | 332 | 16 | 53 | 45.786 | P | 0.200 | 0.559  |
| SN23 | 2005 | 332 | 16 | 53 | 46.043 | P | 0.200 | -0.221 |
| SN45 | 2005 | 332 | 16 | 53 | 46.099 | P | 0.200 | 0.321  |
| SMM  | 2005 | 332 | 16 | 53 | 46.153 | P | 0.200 | 0.158  |
| SN34 | 2005 | 332 | 16 | 53 | 46.282 | P | 0.200 | -0.190 |
| SN46 | 2005 | 332 | 16 | 53 | 46.588 | P | 0.200 | 0.157  |
| RCT  | 2005 | 332 | 16 | 53 | 46.737 | P | 0.200 | -0.379 |
| SN47 | 2005 | 332 | 16 | 53 | 46.826 | P | 0.200 | 0.067  |
| SN48 | 2005 | 332 | 16 | 53 | 47.015 | P | 0.200 | -0.008 |
| SN36 | 2005 | 332 | 16 | 53 | 47.515 | P | 0.200 | 0.006  |
| SN37 | 2005 | 332 | 16 | 53 | 47.680 | P | 0.200 | -0.011 |
| MPP  | 2005 | 332 | 16 | 53 | 47.775 | P | 0.200 | 0.147  |
| VES  | 2005 | 332 | 16 | 53 | 47.828 | P | 0.200 | -0.861 |
| SN38 | 2005 | 332 | 16 | 53 | 47.974 | P | 0.200 | -0.036 |
| SN25 | 2005 | 332 | 16 | 53 | 48.002 | P | 0.200 | 0.059  |
| MNV  | 2005 | 332 | 16 | 53 | 48.032 | P | 0.200 | -0.035 |
| SN26 | 2005 | 332 | 16 | 53 | 48.335 | P | 0.200 | 0.129  |
| SN15 | 2005 | 332 | 16 | 53 | 48.507 | P | 0.200 | 0.080  |
| SBC  | 2005 | 332 | 16 | 53 | 48.647 | P | 0.200 | 0.081  |
| SN28 | 2005 | 332 | 16 | 53 | 49.057 | P | 0.200 | 0.140  |
| S08C | 2005 | 332 | 16 | 53 | 50.000 | P | 0.200 | 0.158  |
| TIN  | 2005 | 332 | 16 | 53 | 50.250 | P | 0.200 | 0.054  |
| ARV  | 2005 | 332 | 16 | 53 | 50.690 | P | 0.200 | -0.244 |
| ISA  | 2005 | 332 | 16 | 53 | 50.826 | P | 0.200 | -0.643 |
| LGU  | 2005 | 332 | 16 | 53 | 51.162 | P | 0.200 | -0.674 |
| CWC  | 2005 | 332 | 16 | 53 | 51.719 | P | 0.200 | -0.159 |
| TPH  | 2005 | 332 | 16 | 53 | 52.154 | P | 0.200 | -0.210 |
| OSI  | 2005 | 332 | 16 | 53 | 52.311 | P | 0.200 | -0.072 |
| GRA  | 2005 | 332 | 16 | 53 | 53.571 | P | 0.200 | 0.111  |
| DEC  | 2005 | 332 | 16 | 53 | 53.906 | P | 0.200 | -0.662 |
| MPM  | 2005 | 332 | 16 | 53 | 54.761 | P | 0.200 | -0.146 |
| EDW2 | 2005 | 332 | 16 | 53 | 54.806 | P | 0.200 | 0.056  |
| LRL  | 2005 | 332 | 16 | 53 | 54.880 | P | 0.200 | -0.195 |
| CIA  | 2005 | 332 | 16 | 53 | 54.930 | P | 0.200 | -0.777 |
| FMP  | 2005 | 332 | 16 | 53 | 55.017 | P | 0.200 | -0.461 |
| FUR  | 2005 | 332 | 16 | 53 | 56.311 | P | 0.200 | 0.096  |
| BFS  | 2005 | 332 | 16 | 53 | 56.921 | P | 0.200 | -0.429 |
| TPNV | 2005 | 332 | 16 | 53 | 57.847 | P | 0.200 | -0.235 |
| GSC  | 2005 | 332 | 16 | 53 | 58.573 | P | 0.200 | -0.159 |
| RRX  | 2005 | 332 | 16 | 53 | 58.642 | P | 0.200 | 0.016  |
| SHO  | 2005 | 332 | 16 | 53 | 59.395 | P | 0.200 | -0.307 |
| HEC  | 2005 | 332 | 16 | 54 | 1.096  | P | 0.200 | -0.367 |
| BBR  | 2005 | 332 | 16 | 54 | 1.435  | P | 0.200 | 0.953  |
| TUQ  | 2005 | 332 | 16 | 54 | 1.781  | P | 0.200 | -0.196 |

|      |      |    |    |         |          |           |         |       |        |
|------|------|----|----|---------|----------|-----------|---------|-------|--------|
| 2006 | 45   | 15 | 27 | 23.9653 | 20.82100 | 146.17999 | 40.0000 | 112   | -0.007 |
| K01A | 2006 | 45 | 15 | 39      | 5.932    | P         | 0.200   | 0.589 |        |
| TAKO | 2006 | 45 | 15 | 39      | 6.086    | P         | 0.200   | 0.670 |        |
| J02A | 2006 | 45 | 15 | 39      | 8.535    | P         | 0.200   | 0.394 |        |
| I03A | 2006 | 45 | 15 | 39      | 8.882    | P         | 0.200   | 0.609 |        |
| DBO  | 2006 | 45 | 15 | 39      | 10.133   | P         | 0.200   | 0.195 |        |
| JCC  | 2006 | 45 | 15 | 39      | 10.824   | P         | 0.200   | 0.682 |        |
| HUMO | 2006 | 45 | 15 | 39      | 12.278   | P         | 0.200   | 0.528 |        |
| O01C | 2006 | 45 | 15 | 39      | 12.952   | P         | 0.200   | 0.899 |        |
| N02C | 2006 | 45 | 15 | 39      | 13.637   | P         | 0.200   | 0.479 |        |
| YBH  | 2006 | 45 | 15 | 39      | 14.751   | P         | 0.200   | 0.525 |        |
| M02C | 2006 | 45 | 15 | 39      | 14.816   | P         | 0.200   | 0.658 |        |
| P01C | 2006 | 45 | 15 | 39      | 15.364   | P         | 0.200   | 0.180 |        |

|      |      |    |    |    |        |   |       |        |
|------|------|----|----|----|--------|---|-------|--------|
| WDC  | 2006 | 45 | 15 | 39 | 16.988 | P | 0.200 | 0.364  |
| O02C | 2006 | 45 | 15 | 39 | 17.084 | P | 0.200 | 0.630  |
| HOPS | 2006 | 45 | 15 | 39 | 17.180 | P | 0.200 | -0.014 |
| M03C | 2006 | 45 | 15 | 39 | 17.349 | P | 0.200 | -0.029 |
| M04C | 2006 | 45 | 15 | 39 | 17.897 | P | 0.200 | 0.204  |
| GASB | 2006 | 45 | 15 | 39 | 18.526 | P | 0.200 | 0.823  |
| FARB | 2006 | 45 | 15 | 39 | 19.038 | P | 0.200 | -0.373 |
| O03C | 2006 | 45 | 15 | 39 | 19.554 | P | 0.200 | -0.159 |
| MNRC | 2006 | 45 | 15 | 39 | 20.417 | P | 0.200 | 0.357  |
| CVS  | 2006 | 45 | 15 | 39 | 20.432 | P | 0.200 | -0.301 |
| HATC | 2006 | 45 | 15 | 39 | 20.894 | P | 0.200 | 0.121  |
| M05C | 2006 | 45 | 15 | 39 | 21.193 | P | 0.200 | 0.056  |
| SUTB | 2006 | 45 | 15 | 39 | 21.474 | P | 0.200 | -0.518 |
| BRK  | 2006 | 45 | 15 | 39 | 22.181 | P | 0.200 | -0.135 |
| ORV  | 2006 | 45 | 15 | 39 | 22.189 | P | 0.200 | -0.506 |
| BKS  | 2006 | 45 | 15 | 39 | 22.381 | P | 0.200 | 0.009  |
| BRIB | 2006 | 45 | 15 | 39 | 22.707 | P | 0.200 | 0.128  |
| Q03C | 2006 | 45 | 15 | 39 | 22.883 | P | 0.200 | 0.864  |
| JRSC | 2006 | 45 | 15 | 39 | 22.956 | P | 0.200 | -0.270 |
| O04C | 2006 | 45 | 15 | 39 | 23.319 | P | 0.200 | 0.124  |
| BNLO | 2006 | 45 | 15 | 39 | 23.685 | P | 0.200 | -0.263 |
| BDM  | 2006 | 45 | 15 | 39 | 23.879 | P | 0.200 | 0.085  |
| Q04C | 2006 | 45 | 15 | 39 | 24.240 | P | 0.200 | 0.005  |
| M06C | 2006 | 45 | 15 | 39 | 24.284 | P | 0.200 | 0.167  |
| O05C | 2006 | 45 | 15 | 39 | 24.344 | P | 0.200 | 0.076  |
| ELFS | 2006 | 45 | 15 | 39 | 24.389 | P | 0.200 | 0.343  |
| WENL | 2006 | 45 | 15 | 39 | 24.884 | P | 0.200 | 0.029  |
| MHC  | 2006 | 45 | 15 | 39 | 25.928 | P | 0.200 | -0.037 |
| BEK  | 2006 | 45 | 15 | 39 | 26.581 | P | 0.200 | -0.359 |
| R04C | 2006 | 45 | 15 | 39 | 26.713 | P | 0.200 | -0.337 |
| S04C | 2006 | 45 | 15 | 39 | 26.847 | P | 0.200 | -0.025 |
| P05C | 2006 | 45 | 15 | 39 | 26.953 | P | 0.200 | 0.073  |
| LAVA | 2006 | 45 | 15 | 39 | 27.009 | P | 0.200 | -0.142 |
| SAO  | 2006 | 45 | 15 | 39 | 27.514 | P | 0.200 | -0.063 |
| HAST | 2006 | 45 | 15 | 39 | 27.771 | P | 0.200 | -0.061 |
| PACP | 2006 | 45 | 15 | 39 | 28.009 | P | 0.200 | 0.091  |
| CMB  | 2006 | 45 | 15 | 39 | 29.668 | P | 0.200 | -0.047 |
| SN71 | 2006 | 45 | 15 | 39 | 29.825 | P | 0.200 | -0.515 |
| V03C | 2006 | 45 | 15 | 39 | 30.107 | P | 0.200 | 0.423  |
| R05C | 2006 | 45 | 15 | 39 | 30.161 | P | 0.200 | 0.077  |
| S05C | 2006 | 45 | 15 | 39 | 30.837 | P | 0.200 | -0.314 |
| T05C | 2006 | 45 | 15 | 39 | 30.967 | P | 0.200 | 0.437  |
| SN73 | 2006 | 45 | 15 | 39 | 30.990 | P | 0.200 | -0.322 |
| SN85 | 2006 | 45 | 15 | 39 | 31.272 | P | 0.200 | -0.051 |
| U04C | 2006 | 45 | 15 | 39 | 31.488 | P | 0.200 | 0.390  |
| SN62 | 2006 | 45 | 15 | 39 | 31.779 | P | 0.200 | -0.370 |
| S06C | 2006 | 45 | 15 | 39 | 32.093 | P | 0.200 | -0.244 |
| V04C | 2006 | 45 | 15 | 39 | 32.283 | P | 0.200 | 0.451  |
| SN51 | 2006 | 45 | 15 | 39 | 32.447 | P | 0.200 | 0.115  |
| PKD  | 2006 | 45 | 15 | 39 | 32.800 | P | 0.200 | 0.035  |
| SN52 | 2006 | 45 | 15 | 39 | 32.821 | P | 0.200 | -0.427 |
| R06C | 2006 | 45 | 15 | 39 | 33.158 | P | 0.200 | 0.296  |
| SN76 | 2006 | 45 | 15 | 39 | 33.191 | P | 0.200 | 0.227  |
| SN53 | 2006 | 45 | 15 | 39 | 33.433 | P | 0.200 | -0.346 |
| T06C | 2006 | 45 | 15 | 39 | 34.034 | P | 0.200 | -0.226 |
| U05C | 2006 | 45 | 15 | 39 | 34.192 | P | 0.200 | 0.500  |
| SN55 | 2006 | 45 | 15 | 39 | 34.558 | P | 0.200 | -0.014 |
| SN21 | 2006 | 45 | 15 | 39 | 34.800 | P | 0.200 | -0.631 |
| SDP  | 2006 | 45 | 15 | 39 | 35.164 | P | 0.200 | -0.277 |
| SN44 | 2006 | 45 | 15 | 39 | 35.388 | P | 0.200 | 0.024  |
| R07C | 2006 | 45 | 15 | 39 | 35.421 | P | 0.200 | 0.058  |
| SN22 | 2006 | 45 | 15 | 39 | 35.428 | P | 0.200 | -0.403 |
| SN57 | 2006 | 45 | 15 | 39 | 35.691 | P | 0.200 | 0.257  |

|      |      |    |    |    |        |   |       |        |
|------|------|----|----|----|--------|---|-------|--------|
| V05C | 2006 | 45 | 15 | 39 | 35.998 | P | 0.200 | 0.643  |
| SN23 | 2006 | 45 | 15 | 39 | 36.063 | P | 0.200 | -0.286 |
| SMM  | 2006 | 45 | 15 | 39 | 36.387 | P | 0.200 | 0.241  |
| SN34 | 2006 | 45 | 15 | 39 | 36.393 | P | 0.200 | -0.161 |
| SN46 | 2006 | 45 | 15 | 39 | 36.686 | P | 0.200 | 0.190  |
| SN47 | 2006 | 45 | 15 | 39 | 36.818 | P | 0.200 | -0.004 |
| RCT  | 2006 | 45 | 15 | 39 | 36.841 | P | 0.200 | -0.396 |
| SN48 | 2006 | 45 | 15 | 39 | 37.152 | P | 0.200 | 0.072  |
| HELL | 2006 | 45 | 15 | 39 | 37.262 | P | 0.200 | -0.498 |
| SN36 | 2006 | 45 | 15 | 39 | 37.621 | P | 0.200 | 0.038  |
| SN37 | 2006 | 45 | 15 | 39 | 37.781 | P | 0.200 | 0.019  |
| VES  | 2006 | 45 | 15 | 39 | 37.903 | P | 0.200 | -0.933 |
| MPP  | 2006 | 45 | 15 | 39 | 37.930 | P | 0.200 | 0.128  |
| SN38 | 2006 | 45 | 15 | 39 | 38.019 | P | 0.200 | -0.057 |
| SN25 | 2006 | 45 | 15 | 39 | 38.020 | P | 0.200 | -0.008 |
| BMN  | 2006 | 45 | 15 | 39 | 38.081 | P | 0.200 | -0.001 |
| MNV  | 2006 | 45 | 15 | 39 | 38.115 | P | 0.200 | -0.007 |
| SN26 | 2006 | 45 | 15 | 39 | 38.448 | P | 0.200 | 0.159  |
| SN15 | 2006 | 45 | 15 | 39 | 38.580 | P | 0.200 | 0.059  |
| SBC  | 2006 | 45 | 15 | 39 | 38.872 | P | 0.200 | 0.113  |
| SN28 | 2006 | 45 | 15 | 39 | 39.112 | P | 0.200 | 0.121  |
| SCZ2 | 2006 | 45 | 15 | 39 | 39.336 | P | 0.200 | -0.536 |
| SN16 | 2006 | 45 | 15 | 39 | 39.808 | P | 0.200 | 0.113  |
| S08C | 2006 | 45 | 15 | 39 | 40.021 | P | 0.200 | 0.088  |
| TIN  | 2006 | 45 | 15 | 39 | 40.339 | P | 0.200 | 0.029  |
| ISA  | 2006 | 45 | 15 | 39 | 40.918 | P | 0.200 | -0.721 |
| ARV  | 2006 | 45 | 15 | 39 | 40.949 | P | 0.200 | -0.176 |
| LGU  | 2006 | 45 | 15 | 39 | 41.411 | P | 0.200 | -0.651 |
| CWC  | 2006 | 45 | 15 | 39 | 41.885 | P | 0.200 | -0.137 |
| TPH  | 2006 | 45 | 15 | 39 | 42.267 | P | 0.200 | -0.187 |
| OSI  | 2006 | 45 | 15 | 39 | 42.594 | P | 0.200 | 0.005  |
| GRA  | 2006 | 45 | 15 | 39 | 43.676 | P | 0.200 | 0.096  |
| DEC  | 2006 | 45 | 15 | 39 | 44.211 | P | 0.200 | -0.577 |
| EDW2 | 2006 | 45 | 15 | 39 | 45.090 | P | 0.200 | 0.141  |
| LRL  | 2006 | 45 | 15 | 39 | 45.143 | P | 0.200 | -0.113 |
| CIA  | 2006 | 45 | 15 | 39 | 45.319 | P | 0.200 | -0.639 |
| FMP  | 2006 | 45 | 15 | 39 | 45.344 | P | 0.200 | -0.376 |
| FUR  | 2006 | 45 | 15 | 39 | 46.397 | P | 0.200 | 0.021  |
| BFS  | 2006 | 45 | 15 | 39 | 46.987 | P | 0.200 | -0.602 |
| GSC  | 2006 | 45 | 15 | 39 | 48.808 | P | 0.200 | -0.130 |
| RRX  | 2006 | 45 | 15 | 39 | 48.841 | P | 0.200 | -0.007 |
| SHO  | 2006 | 45 | 15 | 39 | 49.613 | P | 0.200 | -0.280 |
| BBR  | 2006 | 45 | 15 | 39 | 49.961 | P | 0.200 | -0.767 |
| HEC  | 2006 | 45 | 15 | 39 | 51.408 | P | 0.200 | -0.283 |
| TUQ  | 2006 | 45 | 15 | 39 | 51.975 | P | 0.200 | -0.213 |

|      |      |    |   |         |          |           |          |       |       |
|------|------|----|---|---------|----------|-----------|----------|-------|-------|
| 2007 | 67   | 5  | 3 | 33.1653 | 29.90800 | 140.20399 | 139.6000 | 314   | 0.000 |
| I03A | 2007 | 67 | 5 | 14      | 55.447   | P         | 0.200    | 0.837 |       |
| K02A | 2007 | 67 | 5 | 14      | 57.513   | P         | 0.200    | 0.501 |       |
| DBO  | 2007 | 67 | 5 | 14      | 57.632   | P         | 0.200    | 0.479 |       |
| J03A | 2007 | 67 | 5 | 14      | 58.127   | P         | 0.200    | 0.733 |       |
| I04A | 2007 | 67 | 5 | 14      | 58.541   | P         | 0.200    | 0.101 |       |
| L02A | 2007 | 67 | 5 | 14      | 58.566   | P         | 0.200    | 0.431 |       |
| HUMO | 2007 | 67 | 5 | 14      | 59.996   | P         | 0.200    | 0.581 |       |
| JCC  | 2007 | 67 | 5 | 15      | 0.528    | P         | 0.200    | 0.653 |       |
| J04A | 2007 | 67 | 5 | 15      | 1.512    | P         | 0.200    | 0.267 |       |
| N02C | 2007 | 67 | 5 | 15      | 3.114    | P         | 0.200    | 0.406 |       |
| YBH  | 2007 | 67 | 5 | 15      | 3.311    | P         | 0.200    | 0.622 |       |
| M02C | 2007 | 67 | 5 | 15      | 3.755    | P         | 0.200    | 0.750 |       |
| K04A | 2007 | 67 | 5 | 15      | 4.469    | P         | 0.200    | 0.387 |       |
| J05A | 2007 | 67 | 5 | 15      | 4.869    | P         | 0.200    | 0.710 |       |
| L04A | 2007 | 67 | 5 | 15      | 4.978    | P         | 0.200    | 0.334 |       |
| M04C | 2007 | 67 | 5 | 15      | 6.207    | P         | 0.200    | 0.262 |       |

|      |      |    |   |    |        |   |       |        |
|------|------|----|---|----|--------|---|-------|--------|
| M03C | 2007 | 67 | 5 | 15 | 6.236  | P | 0.200 | 0.041  |
| P01C | 2007 | 67 | 5 | 15 | 6.317  | P | 0.200 | 0.224  |
| WDC  | 2007 | 67 | 5 | 15 | 6.523  | P | 0.200 | 0.294  |
| O02C | 2007 | 67 | 5 | 15 | 7.086  | P | 0.200 | 0.546  |
| K05A | 2007 | 67 | 5 | 15 | 7.609  | P | 0.200 | 0.648  |
| HOPS | 2007 | 67 | 5 | 15 | 8.438  | P | 0.200 | -0.093 |
| GASB | 2007 | 67 | 5 | 15 | 8.982  | P | 0.200 | 0.702  |
| L05A | 2007 | 67 | 5 | 15 | 9.487  | P | 0.200 | 0.433  |
| M05C | 2007 | 67 | 5 | 15 | 9.715  | P | 0.200 | 0.047  |
| HATC | 2007 | 67 | 5 | 15 | 9.981  | P | 0.200 | 0.093  |
| MCCM | 2007 | 67 | 5 | 15 | 10.958 | P | 0.200 | -0.322 |
| FARB | 2007 | 67 | 5 | 15 | 11.509 | P | 0.200 | -0.456 |
| MNRC | 2007 | 67 | 5 | 15 | 11.721 | P | 0.200 | 0.388  |
| SNG5 | 2007 | 67 | 5 | 15 | 11.893 | P | 0.200 | -0.527 |
| SUTB | 2007 | 67 | 5 | 15 | 12.159 | P | 0.200 | -0.569 |
| CVS  | 2007 | 67 | 5 | 15 | 12.165 | P | 0.200 | -0.359 |
| ORV  | 2007 | 67 | 5 | 15 | 12.430 | P | 0.200 | -0.606 |
| SNG7 | 2007 | 67 | 5 | 15 | 12.841 | P | 0.200 | -0.164 |
| M06C | 2007 | 67 | 5 | 15 | 12.852 | P | 0.200 | 0.255  |
| O04C | 2007 | 67 | 5 | 15 | 12.854 | P | 0.200 | 0.176  |
| ELFS | 2007 | 67 | 5 | 15 | 13.492 | P | 0.200 | 0.345  |
| SNF6 | 2007 | 67 | 5 | 15 | 13.883 | P | 0.200 | -0.432 |
| O05C | 2007 | 67 | 5 | 15 | 14.037 | P | 0.200 | -0.050 |
| SNE4 | 2007 | 67 | 5 | 15 | 14.204 | P | 0.200 | -0.046 |
| BRK  | 2007 | 67 | 5 | 15 | 14.269 | P | 0.200 | -0.254 |
| Q03C | 2007 | 67 | 5 | 15 | 14.312 | P | 0.200 | 0.898  |
| BKS  | 2007 | 67 | 5 | 15 | 14.510 | P | 0.200 | -0.036 |
| SNE5 | 2007 | 67 | 5 | 15 | 14.608 | P | 0.200 | -0.233 |
| BRIB | 2007 | 67 | 5 | 15 | 14.771 | P | 0.200 | 0.074  |
| SNF8 | 2007 | 67 | 5 | 15 | 15.087 | P | 0.200 | -0.166 |
| L07A | 2007 | 67 | 5 | 15 | 15.105 | P | 0.200 | 0.435  |
| SNE7 | 2007 | 67 | 5 | 15 | 15.220 | P | 0.200 | -0.159 |
| Q04C | 2007 | 67 | 5 | 15 | 15.296 | P | 0.200 | 0.042  |
| SNF9 | 2007 | 67 | 5 | 15 | 15.339 | P | 0.200 | -0.208 |
| SNE6 | 2007 | 67 | 5 | 15 | 15.346 | P | 0.200 | -0.493 |
| JRSC | 2007 | 67 | 5 | 15 | 15.394 | P | 0.200 | -0.476 |
| SND4 | 2007 | 67 | 5 | 15 | 15.452 | P | 0.200 | -0.182 |
| SND5 | 2007 | 67 | 5 | 15 | 15.783 | P | 0.200 | -0.383 |
| BDM  | 2007 | 67 | 5 | 15 | 15.878 | P | 0.200 | 0.071  |
| SND7 | 2007 | 67 | 5 | 15 | 16.163 | P | 0.200 | -0.256 |
| N06A | 2007 | 67 | 5 | 15 | 16.238 | P | 0.200 | 0.046  |
| BNLO | 2007 | 67 | 5 | 15 | 16.467 | P | 0.200 | -0.367 |
| SNC3 | 2007 | 67 | 5 | 15 | 16.692 | P | 0.200 | 0.410  |
| SNC4 | 2007 | 67 | 5 | 15 | 16.733 | P | 0.200 | -0.254 |
| SNE9 | 2007 | 67 | 5 | 15 | 16.734 | P | 0.200 | -0.156 |
| SNC5 | 2007 | 67 | 5 | 15 | 16.944 | P | 0.200 | -0.288 |
| P05C | 2007 | 67 | 5 | 15 | 17.155 | P | 0.200 | -0.071 |
| M07A | 2007 | 67 | 5 | 15 | 17.172 | P | 0.200 | 0.346  |
| WENL | 2007 | 67 | 5 | 15 | 17.172 | P | 0.200 | 0.028  |
| SND8 | 2007 | 67 | 5 | 15 | 17.502 | P | 0.200 | -0.204 |
| SNB3 | 2007 | 67 | 5 | 15 | 17.642 | P | 0.200 | 0.081  |
| O06A | 2007 | 67 | 5 | 15 | 17.735 | P | 0.200 | -0.001 |
| LAVA | 2007 | 67 | 5 | 15 | 17.774 | P | 0.200 | -0.313 |
| SNC7 | 2007 | 67 | 5 | 15 | 17.943 | P | 0.200 | -0.170 |
| R04C | 2007 | 67 | 5 | 15 | 18.111 | P | 0.200 | -0.350 |
| SND9 | 2007 | 67 | 5 | 15 | 18.226 | P | 0.200 | 0.148  |
| SNC6 | 2007 | 67 | 5 | 15 | 18.308 | P | 0.200 | -0.115 |
| MHC  | 2007 | 67 | 5 | 15 | 18.353 | P | 0.200 | -0.145 |
| SNB5 | 2007 | 67 | 5 | 15 | 18.392 | P | 0.200 | -0.227 |
| P06A | 2007 | 67 | 5 | 15 | 18.933 | P | 0.200 | 0.234  |
| SNC8 | 2007 | 67 | 5 | 15 | 18.960 | P | 0.200 | -0.051 |
| S04C | 2007 | 67 | 5 | 15 | 19.074 | P | 0.200 | -0.095 |
| SNA3 | 2007 | 67 | 5 | 15 | 19.233 | P | 0.200 | 0.156  |

|      |      |    |   |    |        |   |       |        |
|------|------|----|---|----|--------|---|-------|--------|
| SNA4 | 2007 | 67 | 5 | 15 | 19.368 | P | 0.200 | -0.136 |
| N07B | 2007 | 67 | 5 | 15 | 19.446 | P | 0.200 | 0.209  |
| SNB6 | 2007 | 67 | 5 | 15 | 19.604 | P | 0.200 | -0.149 |
| SNB7 | 2007 | 67 | 5 | 15 | 19.616 | P | 0.200 | -0.076 |
| SNA5 | 2007 | 67 | 5 | 15 | 19.877 | P | 0.200 | -0.300 |
| SAO  | 2007 | 67 | 5 | 15 | 20.332 | P | 0.200 | -0.253 |
| SN93 | 2007 | 67 | 5 | 15 | 20.490 | P | 0.200 | 0.462  |
| WCN  | 2007 | 67 | 5 | 15 | 20.571 | P | 0.200 | 0.172  |
| PACP | 2007 | 67 | 5 | 15 | 20.699 | P | 0.200 | 0.053  |
| R05C | 2007 | 67 | 5 | 15 | 20.947 | P | 0.200 | 0.067  |
| SNA7 | 2007 | 67 | 5 | 15 | 20.948 | P | 0.200 | 0.268  |
| SN95 | 2007 | 67 | 5 | 15 | 20.977 | P | 0.200 | -0.113 |
| SNB9 | 2007 | 67 | 5 | 15 | 21.022 | P | 0.200 | 0.220  |
| HAST | 2007 | 67 | 5 | 15 | 21.076 | P | 0.200 | -0.163 |
| CMB  | 2007 | 67 | 5 | 15 | 21.174 | P | 0.200 | -0.055 |
| O07A | 2007 | 67 | 5 | 15 | 21.363 | P | 0.200 | 0.121  |
| SN96 | 2007 | 67 | 5 | 15 | 21.681 | P | 0.200 | 0.037  |
| SNA8 | 2007 | 67 | 5 | 15 | 21.693 | P | 0.200 | 0.083  |
| SN84 | 2007 | 67 | 5 | 15 | 21.697 | P | 0.200 | -0.361 |
| SN97 | 2007 | 67 | 5 | 15 | 21.713 | P | 0.200 | 0.162  |
| SN85 | 2007 | 67 | 5 | 15 | 22.365 | P | 0.200 | -0.117 |
| N08A | 2007 | 67 | 5 | 15 | 22.501 | P | 0.200 | 0.230  |
| SN98 | 2007 | 67 | 5 | 15 | 22.757 | P | 0.200 | 0.174  |
| S05C | 2007 | 67 | 5 | 15 | 22.878 | P | 0.200 | -0.407 |
| SN74 | 2007 | 67 | 5 | 15 | 22.906 | P | 0.200 | -0.409 |
| P07A | 2007 | 67 | 5 | 15 | 23.155 | P | 0.200 | 0.179  |
| S06C | 2007 | 67 | 5 | 15 | 23.544 | P | 0.200 | -0.292 |
| T05C | 2007 | 67 | 5 | 15 | 23.632 | P | 0.200 | 0.433  |
| V03C | 2007 | 67 | 5 | 15 | 23.662 | P | 0.200 | 0.377  |
| R06C | 2007 | 67 | 5 | 15 | 23.846 | P | 0.200 | 0.182  |
| SN75 | 2007 | 67 | 5 | 15 | 23.853 | P | 0.200 | -0.122 |
| O08A | 2007 | 67 | 5 | 15 | 24.015 | P | 0.200 | 0.493  |
| SN63 | 2007 | 67 | 5 | 15 | 24.227 | P | 0.200 | -0.313 |
| U04C | 2007 | 67 | 5 | 15 | 24.585 | P | 0.200 | 0.344  |
| SN64 | 2007 | 67 | 5 | 15 | 24.689 | P | 0.200 | -0.174 |
| Q07A | 2007 | 67 | 5 | 15 | 24.782 | P | 0.200 | 0.085  |
| SN65 | 2007 | 67 | 5 | 15 | 24.827 | P | 0.200 | -0.177 |
| SN55 | 2007 | 67 | 5 | 15 | 25.865 | P | 0.200 | -0.052 |
| P08A | 2007 | 67 | 5 | 15 | 25.960 | P | 0.200 | 0.596  |
| V04C | 2007 | 67 | 5 | 15 | 26.134 | P | 0.200 | 0.437  |
| PKD  | 2007 | 67 | 5 | 15 | 26.163 | P | 0.200 | -0.099 |
| T06C | 2007 | 67 | 5 | 15 | 26.212 | P | 0.200 | -0.320 |
| SN43 | 2007 | 67 | 5 | 15 | 26.307 | P | 0.200 | -0.351 |
| R07C | 2007 | 67 | 5 | 15 | 26.553 | P | 0.200 | 0.115  |
| U05C | 2007 | 67 | 5 | 15 | 27.265 | P | 0.200 | 0.616  |
| PHL  | 2007 | 67 | 5 | 15 | 27.777 | P | 0.200 | 0.246  |
| O09A | 2007 | 67 | 5 | 15 | 27.780 | P | 0.200 | 0.602  |
| SN34 | 2007 | 67 | 5 | 15 | 28.028 | P | 0.200 | -0.262 |
| Q08A | 2007 | 67 | 5 | 15 | 28.268 | P | 0.200 | -0.023 |
| MLAC | 2007 | 67 | 5 | 15 | 28.667 | P | 0.200 | 0.240  |
| SN12 | 2007 | 67 | 5 | 15 | 29.000 | P | 0.200 | -0.479 |
| R08A | 2007 | 67 | 5 | 15 | 29.130 | P | 0.200 | 0.256  |
| V05C | 2007 | 67 | 5 | 15 | 29.286 | P | 0.200 | 0.565  |
| P09A | 2007 | 67 | 5 | 15 | 29.307 | P | 0.200 | 0.083  |
| HELL | 2007 | 67 | 5 | 15 | 29.539 | P | 0.200 | -0.569 |
| RCT  | 2007 | 67 | 5 | 15 | 29.577 | P | 0.200 | -0.420 |
| SN14 | 2007 | 67 | 5 | 15 | 29.818 | P | 0.200 | -0.194 |
| SMM  | 2007 | 67 | 5 | 15 | 30.260 | P | 0.200 | 0.219  |
| Q09A | 2007 | 67 | 5 | 15 | 30.976 | P | 0.200 | 0.045  |
| S08C | 2007 | 67 | 5 | 15 | 31.401 | P | 0.200 | 0.130  |
| P10A | 2007 | 67 | 5 | 15 | 31.499 | P | 0.200 | 0.048  |
| TIN  | 2007 | 67 | 5 | 15 | 32.092 | P | 0.200 | -0.013 |
| MPP  | 2007 | 67 | 5 | 15 | 32.232 | P | 0.200 | 0.245  |

|      |      |    |   |    |        |   |       |        |
|------|------|----|---|----|--------|---|-------|--------|
| TPH  | 2007 | 67 | 5 | 15 | 32.956 | P | 0.200 | -0.071 |
| R09A | 2007 | 67 | 5 | 15 | 32.994 | P | 0.200 | -0.049 |
| SBC  | 2007 | 67 | 5 | 15 | 33.547 | P | 0.200 | 0.174  |
| Q10A | 2007 | 67 | 5 | 15 | 33.717 | P | 0.200 | -0.044 |
| S09A | 2007 | 67 | 5 | 15 | 33.806 | P | 0.200 | -0.116 |
| ISA  | 2007 | 67 | 5 | 15 | 33.852 | P | 0.200 | -0.869 |
| CWC  | 2007 | 67 | 5 | 15 | 34.050 | P | 0.200 | -0.277 |
| ARV  | 2007 | 67 | 5 | 15 | 34.424 | P | 0.200 | -0.362 |
| SCZ2 | 2007 | 67 | 5 | 15 | 34.433 | P | 0.200 | -0.361 |
| GRA  | 2007 | 67 | 5 | 15 | 35.331 | P | 0.200 | 0.174  |
| S10A | 2007 | 67 | 5 | 15 | 35.606 | P | 0.200 | -0.035 |
| R10A | 2007 | 67 | 5 | 15 | 35.786 | P | 0.200 | 0.075  |
| LGU  | 2007 | 67 | 5 | 15 | 36.170 | P | 0.200 | -0.591 |
| Q11A | 2007 | 67 | 5 | 15 | 36.267 | P | 0.200 | -0.149 |
| OSI  | 2007 | 67 | 5 | 15 | 36.742 | P | 0.200 | 0.031  |
| TOV  | 2007 | 67 | 5 | 15 | 37.008 | P | 0.200 | -0.528 |
| MPM  | 2007 | 67 | 5 | 15 | 37.333 | P | 0.200 | -0.202 |
| LRL  | 2007 | 67 | 5 | 15 | 37.946 | P | 0.200 | -0.315 |
| R11A | 2007 | 67 | 5 | 15 | 38.129 | P | 0.200 | 0.225  |
| FUR  | 2007 | 67 | 5 | 15 | 38.277 | P | 0.200 | 0.027  |
| DJJ  | 2007 | 67 | 5 | 15 | 38.448 | P | 0.200 | -0.467 |
| DEC  | 2007 | 67 | 5 | 15 | 38.551 | P | 0.200 | -0.542 |
| EDW2 | 2007 | 67 | 5 | 15 | 38.618 | P | 0.200 | 0.060  |
| VCS  | 2007 | 67 | 5 | 15 | 39.231 | P | 0.200 | -0.097 |
| TPNV | 2007 | 67 | 5 | 15 | 39.297 | P | 0.200 | -0.228 |
| S11A | 2007 | 67 | 5 | 15 | 39.457 | P | 0.200 | 0.083  |
| RPV  | 2007 | 67 | 5 | 15 | 39.805 | P | 0.200 | -0.359 |
| CHF  | 2007 | 67 | 5 | 15 | 39.872 | P | 0.200 | -0.208 |
| MWC  | 2007 | 67 | 5 | 15 | 39.897 | P | 0.200 | -0.510 |
| FMP  | 2007 | 67 | 5 | 15 | 40.246 | P | 0.200 | -0.229 |
| CIA  | 2007 | 67 | 5 | 15 | 40.432 | P | 0.200 | -0.616 |
| U10A | 2007 | 67 | 5 | 15 | 40.809 | P | 0.200 | 0.425  |
| BFS  | 2007 | 67 | 5 | 15 | 41.222 | P | 0.200 | -0.454 |
| ADO  | 2007 | 67 | 5 | 15 | 41.603 | P | 0.200 | -0.097 |
| VTV  | 2007 | 67 | 5 | 15 | 41.705 | P | 0.200 | -0.197 |
| GSC  | 2007 | 67 | 5 | 15 | 41.746 | P | 0.200 | -0.096 |
| SHO  | 2007 | 67 | 5 | 15 | 41.868 | P | 0.200 | -0.248 |
| T11A | 2007 | 67 | 5 | 15 | 42.106 | P | 0.200 | -0.076 |
| RRX  | 2007 | 67 | 5 | 15 | 42.361 | P | 0.200 | 0.174  |
| SDD  | 2007 | 67 | 5 | 15 | 43.199 | P | 0.200 | -0.081 |
| SVD  | 2007 | 67 | 5 | 15 | 43.515 | P | 0.200 | -0.561 |
| BBR  | 2007 | 67 | 5 | 15 | 43.938 | P | 0.200 | -0.631 |
| U11A | 2007 | 67 | 5 | 15 | 44.183 | P | 0.200 | 0.415  |
| TUQ  | 2007 | 67 | 5 | 15 | 44.577 | P | 0.200 | -0.086 |
| HEC  | 2007 | 67 | 5 | 15 | 44.610 | P | 0.200 | -0.256 |
| V11A | 2007 | 67 | 5 | 15 | 45.218 | P | 0.200 | -0.186 |

|      |      |    |    |         |          |           |         |        |       |
|------|------|----|----|---------|----------|-----------|---------|--------|-------|
| 2007 | 30   | 21 | 37 | 46.4961 | 20.98500 | 144.69600 | 30.0000 | 305    | 0.011 |
| TAKO | 2007 | 30 | 21 | 49      | 34.503   | P         | 0.200   | -0.029 |       |
| K01A | 2007 | 30 | 21 | 49      | 35.204   | P         | 0.200   | 0.639  |       |
| J02A | 2007 | 30 | 21 | 49      | 37.700   | P         | 0.200   | 0.432  |       |
| I03A | 2007 | 30 | 21 | 49      | 37.975   | P         | 0.200   | 0.643  |       |
| M01C | 2007 | 30 | 21 | 49      | 38.079   | P         | 0.200   | 0.720  |       |
| K02A | 2007 | 30 | 21 | 49      | 38.904   | P         | 0.200   | 0.322  |       |
| DBO  | 2007 | 30 | 21 | 49      | 39.395   | P         | 0.200   | 0.325  |       |
| L02A | 2007 | 30 | 21 | 49      | 39.556   | P         | 0.200   | 0.462  |       |
| J03A | 2007 | 30 | 21 | 49      | 40.221   | P         | 0.200   | 0.635  |       |
| JCC  | 2007 | 30 | 21 | 49      | 40.224   | P         | 0.200   | 0.714  |       |
| I04A | 2007 | 30 | 21 | 49      | 40.961   | P         | 0.200   | -0.157 |       |
| HUMO | 2007 | 30 | 21 | 49      | 41.411   | P         | 0.200   | 0.512  |       |
| O01C | 2007 | 30 | 21 | 49      | 42.288   | P         | 0.200   | 0.842  |       |
| N02C | 2007 | 30 | 21 | 49      | 42.885   | P         | 0.200   | 0.425  |       |
| J04A | 2007 | 30 | 21 | 49      | 43.598   | P         | 0.200   | 0.161  |       |



|      |      |    |    |    |        |   |       |        |
|------|------|----|----|----|--------|---|-------|--------|
| YBH  | 2007 | 30 | 21 | 49 | 43.936 | P | 0.200 | 0.527  |
| M02C | 2007 | 30 | 21 | 49 | 44.088 | P | 0.200 | 0.711  |
| P01C | 2007 | 30 | 21 | 49 | 44.764 | P | 0.200 | 0.176  |
| K04A | 2007 | 30 | 21 | 49 | 46.020 | P | 0.200 | 0.255  |
| L04A | 2007 | 30 | 21 | 49 | 46.096 | P | 0.200 | 0.195  |
| WDC  | 2007 | 30 | 21 | 49 | 46.247 | P | 0.200 | 0.355  |
| O02C | 2007 | 30 | 21 | 49 | 46.441 | P | 0.200 | 0.673  |
| HOPS | 2007 | 30 | 21 | 49 | 46.593 | P | 0.200 | -0.023 |
| M03C | 2007 | 30 | 21 | 49 | 46.627 | P | 0.200 | 0.063  |
| J05A | 2007 | 30 | 21 | 49 | 47.018 | P | 0.200 | 0.482  |
| M04C | 2007 | 30 | 21 | 49 | 47.066 | P | 0.200 | 0.248  |
| GASB | 2007 | 30 | 21 | 49 | 47.715 | P | 0.200 | 0.667  |
| MCCM | 2007 | 30 | 21 | 49 | 48.417 | P | 0.200 | -0.254 |
| FARB | 2007 | 30 | 21 | 49 | 48.434 | P | 0.200 | -0.473 |
| O03C | 2007 | 30 | 21 | 49 | 48.867 | P | 0.200 | -0.108 |
| K05A | 2007 | 30 | 21 | 49 | 49.387 | P | 0.200 | 0.531  |
| CVS  | 2007 | 30 | 21 | 49 | 49.792 | P | 0.200 | -0.355 |
| MNRC | 2007 | 30 | 21 | 49 | 49.840 | P | 0.200 | 0.401  |
| HATC | 2007 | 30 | 21 | 49 | 50.156 | P | 0.200 | 0.223  |
| M05C | 2007 | 30 | 21 | 49 | 50.393 | P | 0.200 | 0.146  |
| L05A | 2007 | 30 | 21 | 49 | 50.698 | P | 0.200 | 0.370  |
| SUTB | 2007 | 30 | 21 | 49 | 50.822 | P | 0.200 | -0.471 |
| SNG5 | 2007 | 30 | 21 | 49 | 51.102 | P | 0.200 | -0.359 |
| ORV  | 2007 | 30 | 21 | 49 | 51.493 | P | 0.200 | -0.456 |
| BRK  | 2007 | 30 | 21 | 49 | 51.557 | P | 0.200 | -0.191 |
| BKS  | 2007 | 30 | 21 | 49 | 51.705 | P | 0.200 | -0.087 |
| BRIB | 2007 | 30 | 21 | 49 | 52.022 | P | 0.200 | 0.033  |
| Q03C | 2007 | 30 | 21 | 49 | 52.239 | P | 0.200 | 0.863  |
| JRSC | 2007 | 30 | 21 | 49 | 52.260 | P | 0.200 | -0.419 |
| SNG7 | 2007 | 30 | 21 | 49 | 52.369 | P | 0.200 | -0.099 |
| O04C | 2007 | 30 | 21 | 49 | 52.539 | P | 0.200 | 0.176  |
| SNE4 | 2007 | 30 | 21 | 49 | 52.907 | P | 0.200 | 0.009  |
| BNLO | 2007 | 30 | 21 | 49 | 53.002 | P | 0.200 | -0.409 |
| BDM  | 2007 | 30 | 21 | 49 | 53.019 | P | 0.200 | -0.165 |
| SNF6 | 2007 | 30 | 21 | 49 | 53.137 | P | 0.200 | -0.277 |
| M06C | 2007 | 30 | 21 | 49 | 53.346 | P | 0.200 | 0.166  |
| Q04C | 2007 | 30 | 21 | 49 | 53.483 | P | 0.200 | -0.046 |
| SNE5 | 2007 | 30 | 21 | 49 | 53.528 | P | 0.200 | -0.108 |
| ELFS | 2007 | 30 | 21 | 49 | 53.561 | P | 0.200 | 0.399  |
| O05C | 2007 | 30 | 21 | 49 | 53.576 | P | 0.200 | 0.129  |
| SND4 | 2007 | 30 | 21 | 49 | 54.007 | P | 0.200 | -0.107 |
| WENL | 2007 | 30 | 21 | 49 | 54.236 | P | 0.200 | -0.025 |
| SNE6 | 2007 | 30 | 21 | 49 | 54.360 | P | 0.200 | -0.418 |
| SNF8 | 2007 | 30 | 21 | 49 | 54.570 | P | 0.200 | -0.155 |
| SND5 | 2007 | 30 | 21 | 49 | 54.575 | P | 0.200 | -0.284 |
| SNC3 | 2007 | 30 | 21 | 49 | 54.891 | P | 0.200 | 0.424  |
| SNF9 | 2007 | 30 | 21 | 49 | 54.919 | P | 0.200 | -0.287 |
| SNC4 | 2007 | 30 | 21 | 49 | 55.210 | P | 0.200 | -0.163 |
| MHC  | 2007 | 30 | 21 | 49 | 55.289 | P | 0.200 | -0.088 |
| SND7 | 2007 | 30 | 21 | 49 | 55.409 | P | 0.200 | -0.161 |
| SNC5 | 2007 | 30 | 21 | 49 | 55.620 | P | 0.200 | -0.197 |
| BEK  | 2007 | 30 | 21 | 49 | 55.727 | P | 0.200 | -0.368 |
| SNB3 | 2007 | 30 | 21 | 49 | 55.754 | P | 0.200 | 0.090  |
| R04C | 2007 | 30 | 21 | 49 | 55.910 | P | 0.200 | -0.436 |
| LAVA | 2007 | 30 | 21 | 49 | 56.158 | P | 0.200 | -0.251 |
| S04C | 2007 | 30 | 21 | 49 | 56.172 | P | 0.200 | -0.080 |
| SNE9 | 2007 | 30 | 21 | 49 | 56.310 | P | 0.200 | -0.133 |
| N06A | 2007 | 30 | 21 | 49 | 56.476 | P | 0.200 | 0.018  |
| L07A | 2007 | 30 | 21 | 49 | 56.520 | P | 0.200 | 0.364  |
| SND8 | 2007 | 30 | 21 | 49 | 56.734 | P | 0.200 | -0.181 |
| SAO  | 2007 | 30 | 21 | 49 | 56.845 | P | 0.200 | -0.167 |
| SNB5 | 2007 | 30 | 21 | 49 | 56.884 | P | 0.200 | -0.161 |
| SNC7 | 2007 | 30 | 21 | 49 | 56.945 | P | 0.200 | -0.055 |

|      |      |    |    |    |        |   |       |        |
|------|------|----|----|----|--------|---|-------|--------|
| SNC6 | 2007 | 30 | 21 | 49 | 57.043 | P | 0.200 | -0.056 |
| HAST | 2007 | 30 | 21 | 49 | 57.183 | P | 0.200 | -0.110 |
| SNA3 | 2007 | 30 | 21 | 49 | 57.339 | P | 0.200 | 0.272  |
| PACP | 2007 | 30 | 21 | 49 | 57.412 | P | 0.200 | 0.088  |
| O06A | 2007 | 30 | 21 | 49 | 57.500 | P | 0.200 | 0.010  |
| SNA4 | 2007 | 30 | 21 | 49 | 57.615 | P | 0.200 | -0.018 |
| SND9 | 2007 | 30 | 21 | 49 | 57.655 | P | 0.200 | 0.172  |
| M07A | 2007 | 30 | 21 | 49 | 58.045 | P | 0.200 | 0.264  |
| SNC8 | 2007 | 30 | 21 | 49 | 58.117 | P | 0.200 | 0.018  |
| P06A | 2007 | 30 | 21 | 49 | 58.150 | P | 0.200 | 0.139  |
| SNB6 | 2007 | 30 | 21 | 49 | 58.194 | P | 0.200 | -0.099 |
| SNA5 | 2007 | 30 | 21 | 49 | 58.290 | P | 0.200 | -0.176 |
| SN93 | 2007 | 30 | 21 | 49 | 58.412 | P | 0.200 | 0.531  |
| SNB7 | 2007 | 30 | 21 | 49 | 58.426 | P | 0.200 | 0.049  |
| CMB  | 2007 | 30 | 21 | 49 | 58.985 | P | 0.200 | 0.008  |
| SN95 | 2007 | 30 | 21 | 49 | 59.129 | P | 0.200 | -0.014 |
| R05C | 2007 | 30 | 21 | 49 | 59.361 | P | 0.200 | 0.078  |
| V03C | 2007 | 30 | 21 | 49 | 59.565 | P | 0.200 | 0.427  |
| SN84 | 2007 | 30 | 21 | 49 | 59.614 | P | 0.200 | -0.348 |
| SNA7 | 2007 | 30 | 21 | 49 | 59.668 | P | 0.200 | 0.271  |
| WCN  | 2007 | 30 | 21 | 49 | 59.678 | P | 0.200 | 0.289  |
| N07B | 2007 | 30 | 21 | 49 | 59.707 | P | 0.200 | 0.029  |
| SN96 | 2007 | 30 | 21 | 49 | 59.951 | P | 0.200 | 0.103  |
| S05C | 2007 | 30 | 21 | 50 | 0.143  | P | 0.200 | -0.313 |
| SNB9 | 2007 | 30 | 21 | 50 | 0.161  | P | 0.200 | 0.277  |
| SN97 | 2007 | 30 | 21 | 50 | 0.323  | P | 0.200 | 0.222  |
| T05C | 2007 | 30 | 21 | 50 | 0.327  | P | 0.200 | 0.439  |
| SN85 | 2007 | 30 | 21 | 50 | 0.534  | P | 0.200 | -0.008 |
| SNA8 | 2007 | 30 | 21 | 50 | 0.596  | P | 0.200 | 0.144  |
| U04C | 2007 | 30 | 21 | 50 | 0.889  | P | 0.200 | 0.400  |
| SN86 | 2007 | 30 | 21 | 50 | 1.039  | P | 0.200 | 0.204  |
| O07A | 2007 | 30 | 21 | 50 | 1.142  | P | 0.200 | -0.014 |
| S06C | 2007 | 30 | 21 | 50 | 1.278  | P | 0.200 | -0.294 |
| SN98 | 2007 | 30 | 21 | 50 | 1.487  | P | 0.200 | 0.182  |
| V04C | 2007 | 30 | 21 | 50 | 1.733  | P | 0.200 | 0.451  |
| SN75 | 2007 | 30 | 21 | 50 | 1.832  | P | 0.200 | -0.114 |
| SN63 | 2007 | 30 | 21 | 50 | 1.880  | P | 0.200 | -0.266 |
| PKD  | 2007 | 30 | 21 | 50 | 2.155  | P | 0.200 | -0.024 |
| R06C | 2007 | 30 | 21 | 50 | 2.272  | P | 0.200 | 0.241  |
| SN64 | 2007 | 30 | 21 | 50 | 2.399  | P | 0.200 | -0.239 |
| P07A | 2007 | 30 | 21 | 50 | 2.632  | P | 0.200 | 0.294  |
| SN65 | 2007 | 30 | 21 | 50 | 2.784  | P | 0.200 | -0.139 |
| N08A | 2007 | 30 | 21 | 50 | 3.004  | P | 0.200 | 0.143  |
| PHL  | 2007 | 30 | 21 | 50 | 3.152  | P | 0.200 | 0.156  |
| T06C | 2007 | 30 | 21 | 50 | 3.210  | P | 0.200 | -0.335 |
| U05C | 2007 | 30 | 21 | 50 | 3.640  | P | 0.200 | 0.594  |
| SN55 | 2007 | 30 | 21 | 50 | 3.701  | P | 0.200 | -0.074 |
| Q07A | 2007 | 30 | 21 | 50 | 3.746  | P | 0.200 | 0.144  |
| SN43 | 2007 | 30 | 21 | 50 | 3.806  | P | 0.200 | -0.271 |
| O08A | 2007 | 30 | 21 | 50 | 3.983  | P | 0.200 | 0.261  |
| R07C | 2007 | 30 | 21 | 50 | 4.579  | P | 0.200 | 0.048  |
| V05C | 2007 | 30 | 21 | 50 | 5.305  | P | 0.200 | 0.589  |
| SN34 | 2007 | 30 | 21 | 50 | 5.544  | P | 0.200 | -0.220 |
| P08A | 2007 | 30 | 21 | 50 | 5.719  | P | 0.200 | 0.701  |
| SMM  | 2007 | 30 | 21 | 50 | 5.782  | P | 0.200 | 0.244  |
| RCT  | 2007 | 30 | 21 | 50 | 6.069  | P | 0.200 | -0.438 |
| SN12 | 2007 | 30 | 21 | 50 | 6.158  | P | 0.200 | -0.387 |
| HELL | 2007 | 30 | 21 | 50 | 6.451  | P | 0.200 | -0.537 |
| Q08A | 2007 | 30 | 21 | 50 | 7.130  | P | 0.200 | -0.110 |
| SN14 | 2007 | 30 | 21 | 50 | 7.178  | P | 0.200 | -0.158 |
| VES  | 2007 | 30 | 21 | 50 | 7.194  | P | 0.200 | -0.922 |
| MPP  | 2007 | 30 | 21 | 50 | 7.283  | P | 0.200 | 0.090  |
| R08A | 2007 | 30 | 21 | 50 | 7.566  | P | 0.200 | 0.208  |

|      |      |    |    |    |        |   |       |        |
|------|------|----|----|----|--------|---|-------|--------|
| O09A | 2007 | 30 | 21 | 50 | 7.810  | P | 0.200 | 0.375  |
| SBC  | 2007 | 30 | 21 | 50 | 8.191  | P | 0.200 | 0.027  |
| SCZ2 | 2007 | 30 | 21 | 50 | 8.770  | P | 0.200 | -0.518 |
| P09A | 2007 | 30 | 21 | 50 | 8.912  | P | 0.200 | 0.000  |
| S08C | 2007 | 30 | 21 | 50 | 9.194  | P | 0.200 | 0.150  |
| TIN  | 2007 | 30 | 21 | 50 | 9.492  | P | 0.200 | 0.036  |
| ARV  | 2007 | 30 | 21 | 50 | 10.057 | P | 0.200 | -0.360 |
| ISA  | 2007 | 30 | 21 | 50 | 10.068 | P | 0.200 | -0.813 |
| Q09A | 2007 | 30 | 21 | 50 | 10.106 | P | 0.200 | 0.067  |
| LGU  | 2007 | 30 | 21 | 50 | 10.740 | P | 0.200 | -0.699 |
| SNCC | 2007 | 30 | 21 | 50 | 10.776 | P | 0.200 | -0.483 |
| CWC  | 2007 | 30 | 21 | 50 | 10.960 | P | 0.200 | -0.229 |
| R09A | 2007 | 30 | 21 | 50 | 11.638 | P | 0.200 | -0.010 |
| TOV  | 2007 | 30 | 21 | 50 | 11.778 | P | 0.200 | -0.560 |
| S09A | 2007 | 30 | 21 | 50 | 11.982 | P | 0.200 | -0.098 |
| GRA  | 2007 | 30 | 21 | 50 | 12.762 | P | 0.200 | 0.094  |
| DJJ  | 2007 | 30 | 21 | 50 | 13.114 | P | 0.200 | -0.645 |
| DEC  | 2007 | 30 | 21 | 50 | 13.419 | P | 0.200 | -0.675 |
| MPM  | 2007 | 30 | 21 | 50 | 14.049 | P | 0.200 | -0.161 |
| S10A | 2007 | 30 | 21 | 50 | 14.075 | P | 0.200 | -0.002 |
| RPV  | 2007 | 30 | 21 | 50 | 14.133 | P | 0.200 | -0.585 |
| PASC | 2007 | 30 | 21 | 50 | 14.154 | P | 0.200 | -0.576 |
| LRL  | 2007 | 30 | 21 | 50 | 14.235 | P | 0.200 | -0.204 |
| EDW2 | 2007 | 30 | 21 | 50 | 14.288 | P | 0.200 | 0.095  |
| VCS  | 2007 | 30 | 21 | 50 | 14.341 | P | 0.200 | -0.222 |
| CIA  | 2007 | 30 | 21 | 50 | 14.525 | P | 0.200 | -0.793 |
| USC  | 2007 | 30 | 21 | 50 | 14.589 | P | 0.200 | 0.001  |
| R10A | 2007 | 30 | 21 | 50 | 14.620 | P | 0.200 | 0.132  |
| FMP  | 2007 | 30 | 21 | 50 | 14.625 | P | 0.200 | -0.424 |
| CHF  | 2007 | 30 | 21 | 50 | 14.879 | P | 0.200 | -0.371 |
| MWC  | 2007 | 30 | 21 | 50 | 14.905 | P | 0.200 | -0.550 |
| SLA  | 2007 | 30 | 21 | 50 | 15.100 | P | 0.200 | -0.101 |
| FUR  | 2007 | 30 | 21 | 50 | 15.518 | P | 0.200 | 0.081  |
| Q11A | 2007 | 30 | 21 | 50 | 15.742 | P | 0.200 | -0.037 |
| BFS  | 2007 | 30 | 21 | 50 | 16.187 | P | 0.200 | -0.651 |
| ADO  | 2007 | 30 | 21 | 50 | 16.927 | P | 0.200 | -0.222 |
| SDD  | 2007 | 30 | 21 | 50 | 17.600 | P | 0.200 | -0.293 |
| GSC  | 2007 | 30 | 21 | 50 | 17.932 | P | 0.200 | -0.132 |
| U10A | 2007 | 30 | 21 | 50 | 18.023 | P | 0.200 | 0.401  |
| RRX  | 2007 | 30 | 21 | 50 | 18.103 | P | 0.200 | 0.090  |
| SVD  | 2007 | 30 | 21 | 50 | 18.604 | P | 0.200 | -0.644 |
| SHO  | 2007 | 30 | 21 | 50 | 18.613 | P | 0.200 | -0.330 |
| BBR  | 2007 | 30 | 21 | 50 | 19.196 | P | 0.200 | -0.714 |
| HEC  | 2007 | 30 | 21 | 50 | 20.466 | P | 0.200 | -0.335 |
| TUQ  | 2007 | 30 | 21 | 50 | 21.118 | P | 0.200 | -0.112 |
| U11A | 2007 | 30 | 21 | 50 | 21.748 | P | 0.200 | 0.540  |
| V11A | 2007 | 30 | 21 | 50 | 22.395 | P | 0.200 | 0.035  |

|      |      |     |    |         |          |           |          |        |       |
|------|------|-----|----|---------|----------|-----------|----------|--------|-------|
| 1988 | 251  | 11  | 53 | 26.1871 | 30.31600 | 137.36501 | 501.0000 | 439    | 0.000 |
| arc  | 1988 | 251 | 12 | 4       | 58.930   | P         | 0.200    | -0.144 |       |
| bkr  | 1988 | 251 | 12 | 4       | 58.310   | P         | 0.200    | -0.680 |       |
| bmd  | 1988 | 251 | 12 | 4       | 59.250   | P         | 0.200    | -0.240 |       |
| ccr  | 1988 | 251 | 12 | 4       | 56.230   | P         | 0.200    | 0.195  |       |
| jhn  | 1988 | 251 | 12 | 4       | 57.900   | P         | 0.200    | -0.516 |       |
| ndl  | 1988 | 251 | 12 | 4       | 58.110   | P         | 0.200    | -0.131 |       |
| pmt  | 1988 | 251 | 12 | 4       | 59.390   | P         | 0.200    | -0.134 |       |
| WMD  | 1988 | 251 | 12 | 4       | 57.790   | P         | 0.200    | -0.092 |       |
| cou  | 1988 | 251 | 12 | 4       | 58.430   | P         | 0.200    | 0.098  |       |
| jun  | 1988 | 251 | 12 | 4       | 57.500   | P         | 0.200    | 0.073  |       |
| twr  | 1988 | 251 | 12 | 4       | 57.950   | P         | 0.200    | -0.025 |       |
| BMT  | 1988 | 251 | 12 | 5       | 0.770    | P         | 0.200    | 0.388  |       |
| BNP  | 1988 | 251 | 12 | 4       | 54.500   | P         | 0.200    | 0.528  |       |
| CAL  | 1988 | 251 | 12 | 5       | 3.100    | P         | 0.200    | 0.522  |       |

|     |      |     |    |   |        |   |       |        |
|-----|------|-----|----|---|--------|---|-------|--------|
| DTP | 1988 | 251 | 12 | 5 | 3.020  | P | 0.200 | 0.386  |
| FRI | 1988 | 251 | 12 | 4 | 51.580 | P | 0.200 | 0.150  |
| ISA | 1988 | 251 | 12 | 4 | 58.870 | P | 0.200 | -0.387 |
| JFS | 1988 | 251 | 12 | 5 | 3.450  | P | 0.200 | 0.488  |
| TEJ | 1988 | 251 | 12 | 4 | 59.850 | P | 0.200 | 0.123  |
| TOW | 1988 | 251 | 12 | 5 | 1.850  | P | 0.200 | 0.388  |
| WHV | 1988 | 251 | 12 | 4 | 59.150 | P | 0.200 | -0.562 |
| WJP | 1988 | 251 | 12 | 4 | 59.750 | P | 0.200 | -0.240 |
| WOF | 1988 | 251 | 12 | 4 | 58.360 | P | 0.200 | -0.633 |
| WVP | 1988 | 251 | 12 | 5 | 1.120  | P | 0.200 | 0.152  |
| XMS | 1988 | 251 | 12 | 5 | 3.870  | P | 0.200 | 0.394  |
| ARV | 1988 | 251 | 12 | 4 | 59.490 | P | 0.200 | 0.082  |
| CLC | 1988 | 251 | 12 | 5 | 2.050  | P | 0.200 | -0.012 |
| JAW | 1988 | 251 | 12 | 5 | 1.880  | P | 0.200 | 0.123  |
| LRM | 1988 | 251 | 12 | 5 | 2.730  | P | 0.200 | 0.141  |
| SRT | 1988 | 251 | 12 | 5 | 1.960  | P | 0.200 | 0.117  |
| TJR | 1988 | 251 | 12 | 5 | 0.010  | P | 0.200 | -0.148 |
| WBM | 1988 | 251 | 12 | 5 | 1.540  | P | 0.200 | -0.102 |
| WBS | 1988 | 251 | 12 | 5 | 0.640  | P | 0.200 | -0.304 |
| WCH | 1988 | 251 | 12 | 5 | 0.170  | P | 0.200 | -0.283 |
| WCS | 1988 | 251 | 12 | 5 | 1.240  | P | 0.200 | 0.321  |
| WLH | 1988 | 251 | 12 | 4 | 58.840 | P | 0.200 | -0.009 |
| WRC | 1988 | 251 | 12 | 5 | 1.680  | P | 0.200 | 0.217  |
| WSC | 1988 | 251 | 12 | 5 | 1.090  | P | 0.200 | -0.241 |

|      |     |    |    |         |          |           |         |    |        |
|------|-----|----|----|---------|----------|-----------|---------|----|--------|
| 2005 | 318 | 21 | 38 | 51.7222 | 38.10700 | 144.89600 | 11.0000 | 35 | -0.002 |
|------|-----|----|----|---------|----------|-----------|---------|----|--------|

|      |      |     |    |    |        |   |       |        |
|------|------|-----|----|----|--------|---|-------|--------|
| DBO  | 2005 | 318 | 21 | 49 | 41.464 | P | 0.200 | 0.461  |
| HUMO | 2005 | 318 | 21 | 49 | 44.406 | P | 0.200 | 0.710  |
| JCC  | 2005 | 318 | 21 | 49 | 45.890 | P | 0.200 | 0.738  |
| YBH  | 2005 | 318 | 21 | 49 | 48.396 | P | 0.200 | 0.766  |
| N02C | 2005 | 318 | 21 | 49 | 48.747 | P | 0.200 | 0.592  |
| M02C | 2005 | 318 | 21 | 49 | 48.994 | P | 0.200 | 0.844  |
| M04C | 2005 | 318 | 21 | 49 | 51.323 | P | 0.200 | 0.238  |
| M03C | 2005 | 318 | 21 | 49 | 51.689 | P | 0.200 | 0.083  |
| WDC  | 2005 | 318 | 21 | 49 | 52.315 | P | 0.200 | 0.285  |
| P01C | 2005 | 318 | 21 | 49 | 52.817 | P | 0.200 | 0.322  |
| M05C | 2005 | 318 | 21 | 49 | 55.300 | P | 0.200 | 0.047  |
| GASB | 2005 | 318 | 21 | 49 | 55.344 | P | 0.200 | 0.661  |
| HOPS | 2005 | 318 | 21 | 49 | 55.396 | P | 0.200 | 0.085  |
| HATC | 2005 | 318 | 21 | 49 | 55.868 | P | 0.200 | 0.105  |
| O03C | 2005 | 318 | 21 | 49 | 55.875 | P | 0.200 | -0.242 |
| M06C | 2005 | 318 | 21 | 49 | 58.660 | P | 0.200 | 0.186  |
| MNRC | 2005 | 318 | 21 | 49 | 58.759 | P | 0.200 | 0.408  |
| SUTB | 2005 | 318 | 21 | 49 | 59.047 | P | 0.200 | -0.628 |
| O04C | 2005 | 318 | 21 | 49 | 59.133 | P | 0.200 | 0.114  |
| ORV  | 2005 | 318 | 21 | 49 | 59.303 | P | 0.200 | -0.491 |
| FARB | 2005 | 318 | 21 | 49 | 59.381 | P | 0.200 | -0.359 |
| ELFS | 2005 | 318 | 21 | 49 | 59.649 | P | 0.200 | 0.281  |
| CVS  | 2005 | 318 | 21 | 49 | 59.686 | P | 0.200 | -0.256 |
| O05C | 2005 | 318 | 21 | 50 | 0.860  | P | 0.200 | 0.131  |
| Q03C | 2005 | 318 | 21 | 50 | 1.577  | P | 0.200 | 0.834  |
| BRK  | 2005 | 318 | 21 | 50 | 2.030  | P | 0.200 | -0.289 |
| BKS  | 2005 | 318 | 21 | 50 | 2.274  | P | 0.200 | -0.077 |
| Q04C | 2005 | 318 | 21 | 50 | 2.561  | P | 0.200 | -0.010 |
| BRIB | 2005 | 318 | 21 | 50 | 2.573  | P | 0.200 | 0.075  |
| JRSC | 2005 | 318 | 21 | 50 | 3.553  | P | 0.200 | -0.462 |
| BDM  | 2005 | 318 | 21 | 50 | 3.670  | P | 0.200 | 0.024  |
| P05C | 2005 | 318 | 21 | 50 | 4.371  | P | 0.200 | -0.019 |
| BNLO | 2005 | 318 | 21 | 50 | 4.791  | P | 0.200 | -0.403 |
| WENL | 2005 | 318 | 21 | 50 | 5.181  | P | 0.200 | -0.060 |
| LAVA | 2005 | 318 | 21 | 50 | 5.449  | P | 0.200 | -0.158 |
| R04C | 2005 | 318 | 21 | 50 | 6.097  | P | 0.200 | -0.191 |
| MHC  | 2005 | 318 | 21 | 50 | 6.742  | P | 0.200 | -0.068 |

|      |      |     |    |    |        |   |       |        |
|------|------|-----|----|----|--------|---|-------|--------|
| S04C | 2005 | 318 | 21 | 50 | 7.366  | P | 0.200 | -0.069 |
| R05C | 2005 | 318 | 21 | 50 | 8.716  | P | 0.200 | 0.116  |
| SN95 | 2005 | 318 | 21 | 50 | 9.019  | P | 0.200 | -0.006 |
| PACP | 2005 | 318 | 21 | 50 | 9.311  | P | 0.200 | 0.017  |
| SAO  | 2005 | 318 | 21 | 50 | 9.343  | P | 0.200 | -0.032 |
| CMB  | 2005 | 318 | 21 | 50 | 9.449  | P | 0.200 | 0.094  |
| SN84 | 2005 | 318 | 21 | 50 | 9.841  | P | 0.200 | -0.317 |
| HAST | 2005 | 318 | 21 | 50 | 10.134 | P | 0.200 | -0.146 |
| SN71 | 2005 | 318 | 21 | 50 | 10.162 | P | 0.200 | -0.453 |
| SN85 | 2005 | 318 | 21 | 50 | 10.518 | P | 0.200 | -0.020 |
| SN86 | 2005 | 318 | 21 | 50 | 10.641 | P | 0.200 | 0.136  |
| SN73 | 2005 | 318 | 21 | 50 | 11.010 | P | 0.200 | -0.282 |
| SN74 | 2005 | 318 | 21 | 50 | 11.322 | P | 0.200 | -0.238 |
| S05C | 2005 | 318 | 21 | 50 | 11.413 | P | 0.200 | -0.500 |
| R06C | 2005 | 318 | 21 | 50 | 11.941 | P | 0.200 | 0.276  |
| S06C | 2005 | 318 | 21 | 50 | 12.003 | P | 0.200 | -0.186 |
| SN62 | 2005 | 318 | 21 | 50 | 12.083 | P | 0.200 | -0.431 |
| SN76 | 2005 | 318 | 21 | 50 | 12.242 | P | 0.200 | 0.214  |
| T05C | 2005 | 318 | 21 | 50 | 12.465 | P | 0.200 | 0.396  |
| V03C | 2005 | 318 | 21 | 50 | 12.909 | P | 0.200 | 0.236  |
| SN64 | 2005 | 318 | 21 | 50 | 13.157 | P | 0.200 | -0.107 |
| SN51 | 2005 | 318 | 21 | 50 | 13.160 | P | 0.200 | -0.091 |
| SN66 | 2005 | 318 | 21 | 50 | 13.539 | P | 0.200 | 0.116  |
| SN52 | 2005 | 318 | 21 | 50 | 13.572 | P | 0.200 | -0.416 |
| U04C | 2005 | 318 | 21 | 50 | 13.782 | P | 0.200 | 0.300  |
| SN53 | 2005 | 318 | 21 | 50 | 13.893 | P | 0.200 | -0.351 |
| SN67 | 2005 | 318 | 21 | 50 | 13.947 | P | 0.200 | 0.272  |
| SN54 | 2005 | 318 | 21 | 50 | 14.078 | P | 0.200 | -0.110 |
| SN55 | 2005 | 318 | 21 | 50 | 14.497 | P | 0.200 | 0.100  |
| SN56 | 2005 | 318 | 21 | 50 | 14.966 | P | 0.200 | 0.117  |
| R07C | 2005 | 318 | 21 | 50 | 15.003 | P | 0.200 | 0.184  |
| SN57 | 2005 | 318 | 21 | 50 | 15.131 | P | 0.200 | 0.360  |
| SN43 | 2005 | 318 | 21 | 50 | 15.188 | P | 0.200 | -0.235 |
| T06C | 2005 | 318 | 21 | 50 | 15.233 | P | 0.200 | -0.315 |
| PKD  | 2005 | 318 | 21 | 50 | 15.818 | P | 0.200 | -0.042 |
| V04C | 2005 | 318 | 21 | 50 | 15.845 | P | 0.200 | 0.403  |
| RAMR | 2005 | 318 | 21 | 50 | 15.845 | P | 0.200 | 0.406  |
| SN44 | 2005 | 318 | 21 | 50 | 15.849 | P | 0.200 | 0.055  |
| SN45 | 2005 | 318 | 21 | 50 | 16.199 | P | 0.200 | 0.211  |
| SN48 | 2005 | 318 | 21 | 50 | 16.533 | P | 0.200 | 0.132  |
| U05C | 2005 | 318 | 21 | 50 | 16.579 | P | 0.200 | 0.525  |
| SN22 | 2005 | 318 | 21 | 50 | 16.649 | P | 0.200 | -0.425 |
| SN46 | 2005 | 318 | 21 | 50 | 16.663 | P | 0.200 | 0.204  |
| SN47 | 2005 | 318 | 21 | 50 | 16.665 | P | 0.200 | 0.240  |
| MNV  | 2005 | 318 | 21 | 50 | 17.051 | P | 0.200 | 0.082  |
| SN34 | 2005 | 318 | 21 | 50 | 17.072 | P | 0.200 | -0.092 |
| SN23 | 2005 | 318 | 21 | 50 | 17.139 | P | 0.200 | -0.272 |
| SN11 | 2005 | 318 | 21 | 50 | 17.449 | P | 0.200 | -0.624 |
| SN38 | 2005 | 318 | 21 | 50 | 17.784 | P | 0.200 | 0.239  |
| SN37 | 2005 | 318 | 21 | 50 | 17.788 | P | 0.200 | 0.146  |
| SN36 | 2005 | 318 | 21 | 50 | 17.850 | P | 0.200 | 0.197  |
| SN25 | 2005 | 318 | 21 | 50 | 18.631 | P | 0.200 | -0.025 |
| SN26 | 2005 | 318 | 21 | 50 | 18.751 | P | 0.200 | 0.219  |
| SN28 | 2005 | 318 | 21 | 50 | 18.971 | P | 0.200 | 0.253  |
| V05C | 2005 | 318 | 21 | 50 | 18.991 | P | 0.200 | 0.485  |
| HELL | 2005 | 318 | 21 | 50 | 19.003 | P | 0.200 | -0.504 |
| RCT  | 2005 | 318 | 21 | 50 | 19.111 | P | 0.200 | -0.500 |
| SN15 | 2005 | 318 | 21 | 50 | 19.419 | P | 0.200 | 0.123  |
| SMM  | 2005 | 318 | 21 | 50 | 20.498 | P | 0.200 | 0.294  |
| S08C | 2005 | 318 | 21 | 50 | 20.577 | P | 0.200 | 0.288  |
| SDP  | 2005 | 318 | 21 | 50 | 20.712 | P | 0.200 | -0.080 |
| VES  | 2005 | 318 | 21 | 50 | 20.970 | P | 0.200 | -0.992 |
| TIN  | 2005 | 318 | 21 | 50 | 21.471 | P | 0.200 | 0.058  |

|      |      |     |    |    |        |   |       |        |
|------|------|-----|----|----|--------|---|-------|--------|
| TPH  | 2005 | 318 | 21 | 50 | 21.650 | P | 0.200 | -0.211 |
| MPP  | 2005 | 318 | 21 | 50 | 22.771 | P | 0.200 | 0.277  |
| CWC  | 2005 | 318 | 21 | 50 | 24.003 | P | 0.200 | -0.105 |
| ISA  | 2005 | 318 | 21 | 50 | 24.324 | P | 0.200 | -0.645 |
| SBC  | 2005 | 318 | 21 | 50 | 24.436 | P | 0.200 | 0.201  |
| GRA  | 2005 | 318 | 21 | 50 | 24.954 | P | 0.200 | 0.241  |
| SCZ2 | 2005 | 318 | 21 | 50 | 25.717 | P | 0.200 | -0.289 |
| LGU  | 2005 | 318 | 21 | 50 | 27.543 | P | 0.200 | -0.459 |
| MPM  | 2005 | 318 | 21 | 50 | 27.596 | P | 0.200 | -0.123 |
| OSI  | 2005 | 318 | 21 | 50 | 27.670 | P | 0.200 | 0.017  |
| FUR  | 2005 | 318 | 21 | 50 | 28.393 | P | 0.200 | 0.086  |
| LRL  | 2005 | 318 | 21 | 50 | 28.579 | P | 0.200 | -0.248 |
| SNCC | 2005 | 318 | 21 | 50 | 28.997 | P | 0.200 | -0.148 |
| TPNV | 2005 | 318 | 21 | 50 | 29.217 | P | 0.200 | -0.158 |
| EDW2 | 2005 | 318 | 21 | 50 | 29.564 | P | 0.200 | 0.083  |
| DEC  | 2005 | 318 | 21 | 50 | 29.927 | P | 0.200 | -0.463 |
| FMP  | 2005 | 318 | 21 | 50 | 32.025 | P | 0.200 | -0.150 |
| SHO  | 2005 | 318 | 21 | 50 | 32.476 | P | 0.200 | -0.232 |
| CIA  | 2005 | 318 | 21 | 50 | 32.512 | P | 0.200 | -0.429 |
| GSC  | 2005 | 318 | 21 | 50 | 32.657 | P | 0.200 | -0.075 |
| BFS  | 2005 | 318 | 21 | 50 | 32.907 | P | 0.200 | -0.234 |
| RRX  | 2005 | 318 | 21 | 50 | 33.385 | P | 0.200 | 0.035  |
| TUQ  | 2005 | 318 | 21 | 50 | 35.496 | P | 0.200 | -0.172 |
| BBR  | 2005 | 318 | 21 | 50 | 35.671 | P | 0.200 | -0.486 |
| HEC  | 2005 | 318 | 21 | 50 | 35.968 | P | 0.200 | -0.224 |

|      |     |    |    |         |          |           |         |     |        |
|------|-----|----|----|---------|----------|-----------|---------|-----|--------|
| 2006 | 110 | 17 | 50 | 42.0832 | 34.85800 | 139.20700 | 22.6000 | 117 | -0.010 |
|------|-----|----|----|---------|----------|-----------|---------|-----|--------|

|      |      |     |    |   |        |   |       |        |
|------|------|-----|----|---|--------|---|-------|--------|
| DBO  | 2006 | 110 | 18 | 2 | 5.028  | P | 0.200 | 0.649  |
| L02A | 2006 | 110 | 18 | 2 | 6.464  | P | 0.200 | 0.601  |
| HUMO | 2006 | 110 | 18 | 2 | 7.649  | P | 0.200 | 0.743  |
| JCC  | 2006 | 110 | 18 | 2 | 8.977  | P | 0.200 | 0.674  |
| YBH  | 2006 | 110 | 18 | 2 | 11.156 | P | 0.200 | 0.551  |
| N02C | 2006 | 110 | 18 | 2 | 11.488 | P | 0.200 | 0.374  |
| M02C | 2006 | 110 | 18 | 2 | 12.027 | P | 0.200 | 0.925  |
| O01C | 2006 | 110 | 18 | 2 | 12.038 | P | 0.200 | 0.850  |
| M04C | 2006 | 110 | 18 | 2 | 14.105 | P | 0.200 | 0.278  |
| M03C | 2006 | 110 | 18 | 2 | 14.448 | P | 0.200 | 0.115  |
| WDC  | 2006 | 110 | 18 | 2 | 14.948 | P | 0.200 | 0.227  |
| P01C | 2006 | 110 | 18 | 2 | 15.380 | P | 0.200 | 0.211  |
| O02C | 2006 | 110 | 18 | 2 | 15.822 | P | 0.200 | 0.570  |
| M05C | 2006 | 110 | 18 | 2 | 17.909 | P | 0.200 | 0.169  |
| O03C | 2006 | 110 | 18 | 2 | 18.246 | P | 0.200 | -0.316 |
| HATC | 2006 | 110 | 18 | 2 | 18.405 | P | 0.200 | 0.172  |
| M06C | 2006 | 110 | 18 | 2 | 20.955 | P | 0.200 | 0.220  |
| MNRC | 2006 | 110 | 18 | 2 | 21.197 | P | 0.200 | 0.519  |
| ORV  | 2006 | 110 | 18 | 2 | 21.284 | P | 0.200 | -0.730 |
| SUTB | 2006 | 110 | 18 | 2 | 21.335 | P | 0.200 | -0.553 |
| O04C | 2006 | 110 | 18 | 2 | 21.364 | P | 0.200 | 0.096  |
| FARB | 2006 | 110 | 18 | 2 | 21.498 | P | 0.200 | -0.433 |
| CVS  | 2006 | 110 | 18 | 2 | 21.857 | P | 0.200 | -0.292 |
| O05C | 2006 | 110 | 18 | 2 | 22.920 | P | 0.200 | 0.058  |
| Q03C | 2006 | 110 | 18 | 2 | 23.793 | P | 0.200 | 0.911  |
| BRK  | 2006 | 110 | 18 | 2 | 24.138 | P | 0.200 | -0.229 |
| BKS  | 2006 | 110 | 18 | 2 | 24.276 | P | 0.200 | -0.103 |
| BRIB | 2006 | 110 | 18 | 2 | 24.562 | P | 0.200 | 0.050  |
| Q04C | 2006 | 110 | 18 | 2 | 24.600 | P | 0.200 | 0.020  |
| BEK  | 2006 | 110 | 18 | 2 | 25.136 | P | 0.200 | -0.374 |
| M07A | 2006 | 110 | 18 | 2 | 25.252 | P | 0.200 | 0.423  |
| JRSC | 2006 | 110 | 18 | 2 | 25.494 | P | 0.200 | -0.435 |
| P05C | 2006 | 110 | 18 | 2 | 26.153 | P | 0.200 | -0.134 |
| O06A | 2006 | 110 | 18 | 2 | 26.383 | P | 0.200 | 0.032  |
| BNLO | 2006 | 110 | 18 | 2 | 26.598 | P | 0.200 | -0.430 |
| LAVA | 2006 | 110 | 18 | 2 | 27.145 | P | 0.200 | -0.279 |

|      |      |     |    |   |        |   |       |        |
|------|------|-----|----|---|--------|---|-------|--------|
| R04C | 2006 | 110 | 18 | 2 | 27.684 | P | 0.200 | -0.356 |
| MHC  | 2006 | 110 | 18 | 2 | 28.556 | P | 0.200 | -0.007 |
| S04C | 2006 | 110 | 18 | 2 | 29.133 | P | 0.200 | -0.009 |
| WCN  | 2006 | 110 | 18 | 2 | 29.738 | P | 0.200 | 0.297  |
| O07A | 2006 | 110 | 18 | 2 | 30.034 | P | 0.200 | 0.198  |
| SAO  | 2006 | 110 | 18 | 2 | 30.759 | P | 0.200 | -0.155 |
| CMB  | 2006 | 110 | 18 | 2 | 30.783 | P | 0.200 | -0.122 |
| N08A | 2006 | 110 | 18 | 2 | 30.800 | P | 0.200 | 0.260  |
| PACP | 2006 | 110 | 18 | 2 | 30.948 | P | 0.200 | 0.099  |
| SN71 | 2006 | 110 | 18 | 2 | 31.459 | P | 0.200 | -0.626 |
| HAST | 2006 | 110 | 18 | 2 | 31.540 | P | 0.200 | -0.219 |
| P07A | 2006 | 110 | 18 | 2 | 32.178 | P | 0.200 | 0.316  |
| SN73 | 2006 | 110 | 18 | 2 | 32.419 | P | 0.200 | -0.299 |
| O08A | 2006 | 110 | 18 | 2 | 32.553 | P | 0.200 | 0.533  |
| S05C | 2006 | 110 | 18 | 2 | 32.819 | P | 0.200 | -0.472 |
| R06C | 2006 | 110 | 18 | 2 | 33.281 | P | 0.200 | 0.212  |
| S06C | 2006 | 110 | 18 | 2 | 33.305 | P | 0.200 | -0.260 |
| SN62 | 2006 | 110 | 18 | 2 | 33.309 | P | 0.200 | -0.551 |
| SN76 | 2006 | 110 | 18 | 2 | 33.612 | P | 0.200 | 0.194  |
| T05C | 2006 | 110 | 18 | 2 | 33.957 | P | 0.200 | 0.517  |
| Q07A | 2006 | 110 | 18 | 2 | 34.143 | P | 0.200 | 0.265  |
| V03C | 2006 | 110 | 18 | 2 | 34.288 | P | 0.200 | 0.316  |
| SN51 | 2006 | 110 | 18 | 2 | 34.570 | P | 0.200 | 0.038  |
| SN52 | 2006 | 110 | 18 | 2 | 34.737 | P | 0.200 | -0.494 |
| P08A | 2006 | 110 | 18 | 2 | 34.883 | P | 0.200 | 0.711  |
| SN53 | 2006 | 110 | 18 | 2 | 35.110 | P | 0.200 | -0.380 |
| BMN  | 2006 | 110 | 18 | 2 | 35.144 | P | 0.200 | 0.235  |
| SN67 | 2006 | 110 | 18 | 2 | 35.148 | P | 0.200 | 0.199  |
| U04C | 2006 | 110 | 18 | 2 | 35.223 | P | 0.200 | 0.478  |
| SN54 | 2006 | 110 | 18 | 2 | 35.303 | P | 0.200 | -0.139 |
| SN55 | 2006 | 110 | 18 | 2 | 35.606 | P | 0.200 | -0.029 |
| R07C | 2006 | 110 | 18 | 2 | 36.232 | P | 0.200 | 0.191  |
| SN57 | 2006 | 110 | 18 | 2 | 36.350 | P | 0.200 | 0.387  |
| T06C | 2006 | 110 | 18 | 2 | 36.388 | P | 0.200 | -0.300 |
| PKD  | 2006 | 110 | 18 | 2 | 36.890 | P | 0.200 | -0.073 |
| SN44 | 2006 | 110 | 18 | 2 | 36.954 | P | 0.200 | 0.030  |
| V04C | 2006 | 110 | 18 | 2 | 37.027 | P | 0.200 | 0.470  |
| Q08A | 2006 | 110 | 18 | 2 | 37.385 | P | 0.200 | -0.095 |
| SN21 | 2006 | 110 | 18 | 2 | 37.400 | P | 0.200 | -0.630 |
| SN48 | 2006 | 110 | 18 | 2 | 37.645 | P | 0.200 | 0.151  |
| SN22 | 2006 | 110 | 18 | 2 | 37.709 | P | 0.200 | -0.408 |
| U05C | 2006 | 110 | 18 | 2 | 37.733 | P | 0.200 | 0.606  |
| SN46 | 2006 | 110 | 18 | 2 | 37.781 | P | 0.200 | 0.218  |
| SN47 | 2006 | 110 | 18 | 2 | 37.781 | P | 0.200 | 0.248  |
| SN23 | 2006 | 110 | 18 | 2 | 38.087 | P | 0.200 | -0.352 |
| MNV  | 2006 | 110 | 18 | 2 | 38.163 | P | 0.200 | 0.153  |
| P09A | 2006 | 110 | 18 | 2 | 38.269 | P | 0.200 | 0.219  |
| SN11 | 2006 | 110 | 18 | 2 | 38.371 | P | 0.200 | -0.636 |
| R08A | 2006 | 110 | 18 | 2 | 38.548 | P | 0.200 | 0.239  |
| SN38 | 2006 | 110 | 18 | 2 | 38.713 | P | 0.200 | 0.173  |
| SN37 | 2006 | 110 | 18 | 2 | 38.765 | P | 0.200 | 0.119  |
| SN25 | 2006 | 110 | 18 | 2 | 39.645 | P | 0.200 | 0.051  |
| SN26 | 2006 | 110 | 18 | 2 | 39.805 | P | 0.200 | 0.354  |
| SN28 | 2006 | 110 | 18 | 2 | 39.810 | P | 0.200 | 0.184  |
| V05C | 2006 | 110 | 18 | 2 | 39.918 | P | 0.200 | 0.508  |
| RCT  | 2006 | 110 | 18 | 2 | 40.017 | P | 0.200 | -0.430 |
| Q09A | 2006 | 110 | 18 | 2 | 40.230 | P | 0.200 | 0.128  |
| SN15 | 2006 | 110 | 18 | 2 | 40.334 | P | 0.200 | 0.152  |
| SN16 | 2006 | 110 | 18 | 2 | 41.298 | P | 0.200 | 0.139  |
| S08C | 2006 | 110 | 18 | 2 | 41.377 | P | 0.200 | 0.267  |
| SMM  | 2006 | 110 | 18 | 2 | 41.410 | P | 0.200 | 0.413  |
| VES  | 2006 | 110 | 18 | 2 | 41.617 | P | 0.200 | -1.026 |
| TIN  | 2006 | 110 | 18 | 2 | 42.331 | P | 0.200 | 0.170  |

|      |      |     |    |   |        |   |       |        |
|------|------|-----|----|---|--------|---|-------|--------|
| TPH  | 2006 | 110 | 18 | 2 | 42.522 | P | 0.200 | -0.030 |
| MPP  | 2006 | 110 | 18 | 2 | 43.375 | P | 0.200 | 0.245  |
| S09A | 2006 | 110 | 18 | 2 | 43.687 | P | 0.200 | 0.074  |
| ISA  | 2006 | 110 | 18 | 2 | 44.359 | P | 0.200 | -1.066 |
| CWC  | 2006 | 110 | 18 | 2 | 44.373 | P | 0.200 | -0.289 |
| SBC  | 2006 | 110 | 18 | 2 | 44.945 | P | 0.200 | 0.216  |
| ARV  | 2006 | 110 | 18 | 2 | 45.151 | P | 0.200 | -0.614 |
| GRA  | 2006 | 110 | 18 | 2 | 45.261 | P | 0.200 | 0.071  |
| SCZ2 | 2006 | 110 | 18 | 2 | 46.087 | P | 0.200 | -0.257 |
| LGU  | 2006 | 110 | 18 | 2 | 47.537 | P | 0.200 | -0.696 |
| OSI  | 2006 | 110 | 18 | 2 | 47.754 | P | 0.200 | -0.166 |
| MPM  | 2006 | 110 | 18 | 2 | 47.758 | P | 0.200 | -0.252 |
| FUR  | 2006 | 110 | 18 | 2 | 48.483 | P | 0.200 | -0.031 |
| LRL  | 2006 | 110 | 18 | 2 | 48.649 | P | 0.200 | -0.370 |
| SNCC | 2006 | 110 | 18 | 2 | 48.985 | P | 0.200 | -0.291 |
| TPNV | 2006 | 110 | 18 | 2 | 49.303 | P | 0.200 | -0.230 |
| EDW2 | 2006 | 110 | 18 | 2 | 49.616 | P | 0.200 | 0.013  |
| DEC  | 2006 | 110 | 18 | 2 | 49.859 | P | 0.200 | -0.587 |
| FMP  | 2006 | 110 | 18 | 2 | 51.752 | P | 0.200 | -0.325 |
| CIA  | 2006 | 110 | 18 | 2 | 52.188 | P | 0.200 | -0.616 |
| SHO  | 2006 | 110 | 18 | 2 | 52.310 | P | 0.200 | -0.301 |
| GSC  | 2006 | 110 | 18 | 2 | 52.389 | P | 0.200 | -0.249 |
| BFS  | 2006 | 110 | 18 | 2 | 52.449 | P | 0.200 | -0.555 |
| BBR  | 2006 | 110 | 18 | 2 | 55.065 | P | 0.200 | -0.768 |
| TUQ  | 2006 | 110 | 18 | 2 | 55.217 | P | 0.200 | -0.132 |
| HEC  | 2006 | 110 | 18 | 2 | 55.548 | P | 0.200 | -0.300 |

|      |      |     |    |         |          |           |         |        |       |
|------|------|-----|----|---------|----------|-----------|---------|--------|-------|
| 2006 | 321  | 18  | 3  | 12.3679 | 28.59100 | 129.89500 | 22.0000 | 243    | 0.000 |
| K02A | 2006 | 321 | 18 | 15      | 31.673   | P         | 0.200   | 0.210  |       |
| I04A | 2006 | 321 | 18 | 15      | 32.001   | P         | 0.200   | -0.138 |       |
| J03A | 2006 | 321 | 18 | 15      | 32.053   | P         | 0.200   | 0.571  |       |
| L02A | 2006 | 321 | 18 | 15      | 33.093   | P         | 0.200   | 0.297  |       |
| J04A | 2006 | 321 | 18 | 15      | 34.969   | P         | 0.200   | 0.058  |       |
| JCC  | 2006 | 321 | 18 | 15      | 35.296   | P         | 0.200   | 0.351  |       |
| YBH  | 2006 | 321 | 18 | 15      | 37.288   | P         | 0.200   | 0.406  |       |
| N02C | 2006 | 321 | 18 | 15      | 37.493   | P         | 0.200   | 0.108  |       |
| J05A | 2006 | 321 | 18 | 15      | 37.817   | P         | 0.200   | 0.464  |       |
| K04A | 2006 | 321 | 18 | 15      | 37.838   | P         | 0.200   | 0.196  |       |
| M02C | 2006 | 321 | 18 | 15      | 37.910   | P         | 0.200   | 0.574  |       |
| O01C | 2006 | 321 | 18 | 15      | 37.950   | P         | 0.200   | 0.483  |       |
| L04A | 2006 | 321 | 18 | 15      | 38.553   | P         | 0.200   | 0.208  |       |
| M04C | 2006 | 321 | 18 | 15      | 39.815   | P         | 0.200   | 0.112  |       |
| M03C | 2006 | 321 | 18 | 15      | 40.068   | P         | 0.200   | -0.122 |       |
| WDC  | 2006 | 321 | 18 | 15      | 40.525   | P         | 0.200   | 0.002  |       |
| K05A | 2006 | 321 | 18 | 15      | 40.721   | P         | 0.200   | 0.661  |       |
| P01C | 2006 | 321 | 18 | 15      | 40.840   | P         | 0.200   | -0.126 |       |
| O02C | 2006 | 321 | 18 | 15      | 41.373   | P         | 0.200   | 0.324  |       |
| L05A | 2006 | 321 | 18 | 15      | 42.623   | P         | 0.200   | 0.375  |       |
| M05C | 2006 | 321 | 18 | 15      | 43.063   | P         | 0.200   | -0.084 |       |
| GASB | 2006 | 321 | 18 | 15      | 43.293   | P         | 0.200   | 0.513  |       |
| O03C | 2006 | 321 | 18 | 15      | 43.393   | P         | 0.200   | -0.486 |       |
| HATC | 2006 | 321 | 18 | 15      | 43.620   | P         | 0.200   | 0.050  |       |
| SNG5 | 2006 | 321 | 18 | 15      | 45.446   | P         | 0.200   | -0.821 |       |
| M06C | 2006 | 321 | 18 | 15      | 45.911   | P         | 0.200   | 0.217  |       |
| MNRC | 2006 | 321 | 18 | 15      | 45.965   | P         | 0.200   | 0.178  |       |
| ORV  | 2006 | 321 | 18 | 15      | 46.035   | P         | 0.200   | -0.870 |       |
| SUTB | 2006 | 321 | 18 | 15      | 46.054   | P         | 0.200   | -0.732 |       |
| SNF6 | 2006 | 321 | 18 | 15      | 47.301   | P         | 0.200   | -0.625 |       |
| CVS  | 2006 | 321 | 18 | 15      | 46.517   | P         | 0.200   | -0.529 |       |
| SNE4 | 2006 | 321 | 18 | 15      | 47.758   | P         | 0.200   | -0.286 |       |
| ELFS | 2006 | 321 | 18 | 15      | 46.759   | P         | 0.200   | 0.304  |       |
| SNE5 | 2006 | 321 | 18 | 15      | 48.045   | P         | 0.200   | -0.492 |       |
| O05C | 2006 | 321 | 18 | 15      | 47.381   | P         | 0.200   | -0.186 |       |



|      |      |     |    |    |        |   |       |        |
|------|------|-----|----|----|--------|---|-------|--------|
| SNE7 | 2006 | 321 | 18 | 15 | 48.469 | P | 0.200 | -0.291 |
| SNE6 | 2006 | 321 | 18 | 15 | 48.550 | P | 0.200 | -0.798 |
| L07A | 2006 | 321 | 18 | 15 | 47.651 | P | 0.200 | 0.595  |
| SND5 | 2006 | 321 | 18 | 15 | 49.111 | P | 0.200 | -0.600 |
| Q03C | 2006 | 321 | 18 | 15 | 48.291 | P | 0.200 | 0.650  |
| SND7 | 2006 | 321 | 18 | 15 | 49.355 | P | 0.200 | -0.377 |
| BRK  | 2006 | 321 | 18 | 15 | 48.500 | P | 0.200 | -0.473 |
| BRIB | 2006 | 321 | 18 | 15 | 48.837 | P | 0.200 | -0.217 |
| SND4 | 2006 | 321 | 18 | 15 | 48.877 | P | 0.200 | -0.487 |
| Q04C | 2006 | 321 | 18 | 15 | 49.003 | P | 0.200 | -0.089 |
| N06A | 2006 | 321 | 18 | 15 | 49.006 | P | 0.200 | 0.023  |
| SNC4 | 2006 | 321 | 18 | 15 | 50.054 | P | 0.200 | -0.518 |
| SNC5 | 2006 | 321 | 18 | 15 | 50.241 | P | 0.200 | -0.452 |
| BEK  | 2006 | 321 | 18 | 15 | 49.473 | P | 0.200 | -0.457 |
| SND8 | 2006 | 321 | 18 | 15 | 50.549 | P | 0.200 | -0.293 |
| M07A | 2006 | 321 | 18 | 15 | 49.708 | P | 0.200 | 0.526  |
| BDM  | 2006 | 321 | 18 | 15 | 49.782 | P | 0.200 | -0.217 |
| SNC7 | 2006 | 321 | 18 | 15 | 51.012 | P | 0.200 | -0.362 |
| SNB3 | 2006 | 321 | 18 | 15 | 51.060 | P | 0.200 | -0.170 |
| P05C | 2006 | 321 | 18 | 15 | 50.346 | P | 0.200 | -0.239 |
| O06A | 2006 | 321 | 18 | 15 | 50.563 | P | 0.200 | -0.013 |
| SNB5 | 2006 | 321 | 18 | 15 | 51.591 | P | 0.200 | -0.414 |
| LAVA | 2006 | 321 | 18 | 15 | 50.987 | P | 0.200 | -0.603 |
| SNA4 | 2006 | 321 | 18 | 15 | 52.490 | P | 0.200 | -0.424 |
| SNA3 | 2006 | 321 | 18 | 15 | 52.561 | P | 0.200 | -0.030 |
| R04C | 2006 | 321 | 18 | 15 | 51.574 | P | 0.200 | -0.509 |
| SNB7 | 2006 | 321 | 18 | 15 | 52.682 | P | 0.200 | -0.166 |
| N07B | 2006 | 321 | 18 | 15 | 51.845 | P | 0.200 | 0.281  |
| MHC  | 2006 | 321 | 18 | 15 | 52.328 | P | 0.200 | -0.300 |
| S04C | 2006 | 321 | 18 | 15 | 52.762 | P | 0.200 | -0.358 |
| SNA7 | 2006 | 321 | 18 | 15 | 53.874 | P | 0.200 | 0.174  |
| WCN  | 2006 | 321 | 18 | 15 | 53.445 | P | 0.200 | 0.128  |
| SNA8 | 2006 | 321 | 18 | 15 | 54.501 | P | 0.200 | 0.036  |
| SN97 | 2006 | 321 | 18 | 15 | 54.558 | P | 0.200 | 0.022  |
| O07A | 2006 | 321 | 18 | 15 | 53.827 | P | 0.200 | 0.222  |
| SN93 | 2006 | 321 | 18 | 15 | 53.828 | P | 0.200 | 0.347  |
| R05C | 2006 | 321 | 18 | 15 | 53.899 | P | 0.200 | -0.124 |
| SAO  | 2006 | 321 | 18 | 15 | 54.185 | P | 0.200 | -0.449 |
| CMB  | 2006 | 321 | 18 | 15 | 54.251 | P | 0.200 | -0.344 |
| PACP | 2006 | 321 | 18 | 15 | 54.497 | P | 0.200 | -0.081 |
| N08A | 2006 | 321 | 18 | 15 | 54.550 | P | 0.200 | 0.387  |
| SN96 | 2006 | 321 | 18 | 15 | 54.684 | P | 0.200 | -0.129 |
| HAST | 2006 | 321 | 18 | 15 | 54.958 | P | 0.200 | -0.400 |
| P07A | 2006 | 321 | 18 | 15 | 55.635 | P | 0.200 | 0.220  |
| O08A | 2006 | 321 | 18 | 15 | 56.027 | P | 0.200 | 0.567  |
| S05C | 2006 | 321 | 18 | 15 | 56.070 | P | 0.200 | -0.594 |
| S06C | 2006 | 321 | 18 | 15 | 56.433 | P | 0.200 | -0.486 |
| T05C | 2006 | 321 | 18 | 15 | 57.092 | P | 0.200 | 0.287  |
| V03C | 2006 | 321 | 18 | 15 | 57.433 | P | 0.200 | 0.210  |
| P08A | 2006 | 321 | 18 | 15 | 58.036 | P | 0.200 | 0.695  |
| SN43 | 2006 | 321 | 18 | 15 | 59.066 | P | 0.200 | -0.494 |
| U04C | 2006 | 321 | 18 | 15 | 58.083 | P | 0.200 | 0.179  |
| BMN  | 2006 | 321 | 18 | 15 | 58.343 | P | 0.200 | 0.437  |
| T06C | 2006 | 321 | 18 | 15 | 59.065 | P | 0.200 | -0.533 |
| R07C | 2006 | 321 | 18 | 15 | 59.179 | P | 0.200 | 0.106  |
| O09A | 2006 | 321 | 18 | 15 | 59.328 | P | 0.200 | 0.736  |
| PKD  | 2006 | 321 | 18 | 15 | 59.582 | P | 0.200 | -0.241 |
| RAMR | 2006 | 321 | 18 | 15 | 59.754 | P | 0.200 | 0.298  |
| Q08A | 2006 | 321 | 18 | 16 | 0.216  | P | 0.200 | -0.021 |
| P09A | 2006 | 321 | 18 | 16 | 0.915  | P | 0.200 | 0.261  |
| PHL  | 2006 | 321 | 18 | 16 | 1.053  | P | 0.200 | -0.035 |
| MLAC | 2006 | 321 | 18 | 16 | 1.138  | P | 0.200 | 0.225  |
| R08A | 2006 | 321 | 18 | 16 | 1.250  | P | 0.200 | 0.332  |

|      |      |     |    |    |        |   |       |        |
|------|------|-----|----|----|--------|---|-------|--------|
| HELL | 2006 | 321 | 18 | 16 | 2.093  | P | 0.200 | -0.617 |
| RCT  | 2006 | 321 | 18 | 16 | 2.167  | P | 0.200 | -0.595 |
| V05C | 2006 | 321 | 18 | 16 | 2.324  | P | 0.200 | 0.443  |
| Q09A | 2006 | 321 | 18 | 16 | 2.640  | P | 0.200 | 0.241  |
| SMM  | 2006 | 321 | 18 | 16 | 3.556  | P | 0.200 | 0.301  |
| S08C | 2006 | 321 | 18 | 16 | 3.636  | P | 0.200 | 0.272  |
| TIN  | 2006 | 321 | 18 | 16 | 4.423  | P | 0.200 | 0.153  |
| R09A | 2006 | 321 | 18 | 16 | 4.669  | P | 0.200 | 0.199  |
| TPH  | 2006 | 321 | 18 | 16 | 4.674  | P | 0.200 | 0.122  |
| MPP  | 2006 | 321 | 18 | 16 | 5.422  | P | 0.200 | 0.343  |
| S09A | 2006 | 321 | 18 | 16 | 5.737  | P | 0.200 | 0.277  |
| CWC  | 2006 | 321 | 18 | 16 | 6.210  | P | 0.200 | -0.217 |
| R10A | 2006 | 321 | 18 | 16 | 7.173  | P | 0.200 | 0.430  |
| Q11A | 2006 | 321 | 18 | 16 | 7.266  | P | 0.200 | 0.202  |
| GRA  | 2006 | 321 | 18 | 16 | 7.267  | P | 0.200 | 0.466  |
| SCZ2 | 2006 | 321 | 18 | 16 | 7.421  | P | 0.200 | -0.372 |
| LGU  | 2006 | 321 | 18 | 16 | 9.131  | P | 0.200 | -0.349 |
| FUR  | 2006 | 321 | 18 | 16 | 10.001 | P | 0.200 | 0.362  |
| LRL  | 2006 | 321 | 18 | 16 | 10.205 | P | 0.200 | 0.061  |
| SLA  | 2006 | 321 | 18 | 16 | 10.356 | P | 0.200 | 0.044  |
| EDW2 | 2006 | 321 | 18 | 16 | 11.066 | P | 0.200 | 0.435  |
| U10A | 2006 | 321 | 18 | 16 | 12.294 | P | 0.200 | 0.784  |
| CIA  | 2006 | 321 | 18 | 16 | 13.193 | P | 0.200 | -0.231 |
| U11A | 2006 | 321 | 18 | 16 | 14.970 | P | 0.200 | 0.577  |
| TUQ  | 2006 | 321 | 18 | 16 | 15.849 | P | 0.200 | 0.238  |
| HEC  | 2006 | 321 | 18 | 16 | 16.076 | P | 0.200 | -0.002 |
| V11A | 2006 | 321 | 18 | 16 | 16.214 | P | 0.200 | 0.119  |

|      |      |     |    |        |          |           |         |        |       |
|------|------|-----|----|--------|----------|-----------|---------|--------|-------|
| 2006 | 283  | 23  | 58 | 4.6348 | 37.19700 | 142.66299 | 10.0000 | 230    | 0.017 |
| TAKO | 2006 | 284 | 0  | 9      | 2.026    | P         | 0.200   | 1.066  |       |
| I03A | 2006 | 284 | 0  | 9      | 4.045    | P         | 0.200   | 0.645  |       |
| J02A | 2006 | 284 | 0  | 9      | 4.697    | P         | 0.200   | 0.385  |       |
| K02A | 2006 | 284 | 0  | 9      | 6.872    | P         | 0.200   | 0.325  |       |
| DBO  | 2006 | 284 | 0  | 9      | 6.995    | P         | 0.200   | 0.499  |       |
| J03A | 2006 | 284 | 0  | 9      | 7.317    | P         | 0.200   | 0.692  |       |
| L02A | 2006 | 284 | 0  | 9      | 8.563    | P         | 0.200   | 0.507  |       |
| JCC  | 2006 | 284 | 0  | 9      | 11.410   | P         | 0.200   | 0.775  |       |
| YBH  | 2006 | 284 | 0  | 9      | 13.667   | P         | 0.200   | 0.652  |       |
| N02C | 2006 | 284 | 0  | 9      | 14.091   | P         | 0.200   | 0.525  |       |
| J05A | 2006 | 284 | 0  | 9      | 14.178   | P         | 0.200   | 0.471  |       |
| K04A | 2006 | 284 | 0  | 9      | 14.288   | P         | 0.200   | 0.302  |       |
| M02C | 2006 | 284 | 0  | 9      | 14.366   | P         | 0.200   | 0.829  |       |
| O01C | 2006 | 284 | 0  | 9      | 14.515   | P         | 0.200   | 0.850  |       |
| L04A | 2006 | 284 | 0  | 9      | 15.061   | P         | 0.200   | 0.258  |       |
| M04C | 2006 | 284 | 0  | 9      | 16.604   | P         | 0.200   | 0.224  |       |
| M03C | 2006 | 284 | 0  | 9      | 16.928   | P         | 0.200   | 0.018  |       |
| K05A | 2006 | 284 | 0  | 9      | 17.480   | P         | 0.200   | 0.567  |       |
| WDC  | 2006 | 284 | 0  | 9      | 17.516   | P         | 0.200   | 0.168  |       |
| P01C | 2006 | 284 | 0  | 9      | 17.998   | P         | 0.200   | 0.154  |       |
| O02C | 2006 | 284 | 0  | 9      | 18.364   | P         | 0.200   | 0.473  |       |
| L05A | 2006 | 284 | 0  | 9      | 19.758   | P         | 0.200   | 0.315  |       |
| M05C | 2006 | 284 | 0  | 9      | 20.539   | P         | 0.200   | 0.073  |       |
| GASB | 2006 | 284 | 0  | 9      | 20.569   | P         | 0.200   | 0.592  |       |
| HATC | 2006 | 284 | 0  | 9      | 21.066   | P         | 0.200   | 0.077  |       |
| O03C | 2006 | 284 | 0  | 9      | 21.144   | P         | 0.200   | -0.216 |       |
| SNG5 | 2006 | 284 | 0  | 9      | 23.694   | P         | 0.200   | -0.563 |       |
| M06C | 2006 | 284 | 0  | 9      | 23.771   | P         | 0.200   | 0.167  |       |
| MNRC | 2006 | 284 | 0  | 9      | 24.013   | P         | 0.200   | 0.431  |       |
| SUTB | 2006 | 284 | 0  | 9      | 24.200   | P         | 0.200   | -0.650 |       |
| ORV  | 2006 | 284 | 0  | 9      | 24.243   | P         | 0.200   | -0.718 |       |
| O04C | 2006 | 284 | 0  | 9      | 24.317   | P         | 0.200   | 0.141  |       |
| SNF6 | 2006 | 284 | 0  | 9      | 25.716   | P         | 0.200   | -0.507 |       |
| ELFS | 2006 | 284 | 0  | 9      | 24.760   | P         | 0.200   | 0.258  |       |

|      |      |     |   |   |        |   |       |        |
|------|------|-----|---|---|--------|---|-------|--------|
| CVS  | 2006 | 284 | 0 | 9 | 24.862 | P | 0.200 | -0.279 |
| SNE4 | 2006 | 284 | 0 | 9 | 26.349 | P | 0.200 | -0.069 |
| L07A | 2006 | 284 | 0 | 9 | 25.563 | P | 0.200 | 0.257  |
| SNE5 | 2006 | 284 | 0 | 9 | 26.579 | P | 0.200 | -0.349 |
| O05C | 2006 | 284 | 0 | 9 | 25.859 | P | 0.200 | 0.009  |
| SNE7 | 2006 | 284 | 0 | 9 | 27.073 | P | 0.200 | -0.178 |
| SNE6 | 2006 | 284 | 0 | 9 | 27.246 | P | 0.200 | -0.650 |
| SND5 | 2006 | 284 | 0 | 9 | 28.059 | P | 0.200 | -0.343 |
| SND7 | 2006 | 284 | 0 | 9 | 28.103 | P | 0.200 | -0.316 |
| BRK  | 2006 | 284 | 0 | 9 | 27.257 | P | 0.200 | -0.221 |
| BKS  | 2006 | 284 | 0 | 9 | 27.499 | P | 0.200 | 0.004  |
| N06A | 2006 | 284 | 0 | 9 | 27.545 | P | 0.200 | -0.021 |
| BRIB | 2006 | 284 | 0 | 9 | 27.642 | P | 0.200 | 0.006  |
| Q04C | 2006 | 284 | 0 | 9 | 27.650 | P | 0.200 | -0.023 |
| SND4 | 2006 | 284 | 0 | 9 | 27.651 | P | 0.200 | -0.289 |
| SNC4 | 2006 | 284 | 0 | 9 | 29.086 | P | 0.200 | -0.362 |
| M07A | 2006 | 284 | 0 | 9 | 28.110 | P | 0.200 | 0.225  |
| BEK  | 2006 | 284 | 0 | 9 | 28.184 | P | 0.200 | -0.411 |
| SNC5 | 2006 | 284 | 0 | 9 | 29.254 | P | 0.200 | -0.339 |
| SND8 | 2006 | 284 | 0 | 9 | 29.422 | P | 0.200 | -0.326 |
| JRSC | 2006 | 284 | 0 | 9 | 28.650 | P | 0.200 | -0.477 |
| SNC7 | 2006 | 284 | 0 | 9 | 30.062 | P | 0.200 | -0.283 |
| SNB3 | 2006 | 284 | 0 | 9 | 30.279 | P | 0.200 | 0.073  |
| SNC3 | 2006 | 284 | 0 | 9 | 29.409 | P | 0.200 | 0.594  |
| O06A | 2006 | 284 | 0 | 9 | 29.422 | P | 0.200 | -0.065 |
| LAVA | 2006 | 284 | 0 | 9 | 30.365 | P | 0.200 | -0.275 |
| N07B | 2006 | 284 | 0 | 9 | 30.754 | P | 0.200 | 0.039  |
| P06A | 2006 | 284 | 0 | 9 | 30.829 | P | 0.200 | 0.064  |
| SNA4 | 2006 | 284 | 0 | 9 | 32.003 | P | 0.200 | -0.258 |
| R04C | 2006 | 284 | 0 | 9 | 31.006 | P | 0.200 | -0.310 |
| SNA3 | 2006 | 284 | 0 | 9 | 32.075 | P | 0.200 | 0.185  |
| MHC  | 2006 | 284 | 0 | 9 | 31.772 | P | 0.200 | -0.096 |
| S04C | 2006 | 284 | 0 | 9 | 32.322 | P | 0.200 | -0.151 |
| SNA7 | 2006 | 284 | 0 | 9 | 33.382 | P | 0.200 | 0.199  |
| WCN  | 2006 | 284 | 0 | 9 | 32.882 | P | 0.200 | 0.142  |
| O07A | 2006 | 284 | 0 | 9 | 33.235 | P | 0.200 | 0.099  |
| SNA8 | 2006 | 284 | 0 | 9 | 34.258 | P | 0.200 | 0.165  |
| SN97 | 2006 | 284 | 0 | 9 | 34.290 | P | 0.200 | 0.094  |
| SN93 | 2006 | 284 | 0 | 9 | 33.546 | P | 0.200 | 0.548  |
| R05C | 2006 | 284 | 0 | 9 | 33.558 | P | 0.200 | -0.004 |
| N08A | 2006 | 284 | 0 | 9 | 33.978 | P | 0.200 | 0.108  |
| SAO  | 2006 | 284 | 0 | 9 | 34.211 | P | 0.200 | -0.158 |
| CMB  | 2006 | 284 | 0 | 9 | 34.236 | P | 0.200 | -0.071 |
| PACP | 2006 | 284 | 0 | 9 | 34.333 | P | 0.200 | 0.050  |
| SN96 | 2006 | 284 | 0 | 9 | 34.447 | P | 0.200 | -0.026 |
| HAST | 2006 | 284 | 0 | 9 | 35.094 | P | 0.200 | -0.164 |
| P07A | 2006 | 284 | 0 | 9 | 35.478 | P | 0.200 | 0.217  |
| O08A | 2006 | 284 | 0 | 9 | 35.805 | P | 0.200 | 0.371  |
| S05C | 2006 | 284 | 0 | 9 | 36.303 | P | 0.200 | -0.514 |
| R06C | 2006 | 284 | 0 | 9 | 36.707 | P | 0.200 | 0.158  |
| S06C | 2006 | 284 | 0 | 9 | 36.774 | P | 0.200 | -0.302 |
| T05C | 2006 | 284 | 0 | 9 | 37.464 | P | 0.200 | 0.482  |
| Q07A | 2006 | 284 | 0 | 9 | 37.506 | P | 0.200 | 0.115  |
| SN55 | 2006 | 284 | 0 | 9 | 39.162 | P | 0.200 | -0.073 |
| P08A | 2006 | 284 | 0 | 9 | 38.194 | P | 0.200 | 0.521  |
| BMN  | 2006 | 284 | 0 | 9 | 38.582 | P | 0.200 | 0.135  |
| U04C | 2006 | 284 | 0 | 9 | 38.759 | P | 0.200 | 0.391  |
| SN43 | 2006 | 284 | 0 | 9 | 39.992 | P | 0.200 | -0.260 |
| R07C | 2006 | 284 | 0 | 9 | 39.750 | P | 0.200 | 0.114  |
| O09A | 2006 | 284 | 0 | 9 | 39.833 | P | 0.200 | 0.525  |
| PKD  | 2006 | 284 | 0 | 9 | 40.592 | P | 0.200 | -0.116 |
| RAMR | 2006 | 284 | 0 | 9 | 40.783 | P | 0.200 | 0.479  |
| Q08A | 2006 | 284 | 0 | 9 | 41.010 | P | 0.200 | -0.133 |

|      |      |     |    |         |          |           |        |           |
|------|------|-----|----|---------|----------|-----------|--------|-----------|
| U05C | 2006 | 284 | 0  | 9       | 41.433   | P         | 0.200  | 0.562     |
| P09A | 2006 | 284 | 0  | 9       | 41.863   | P         | 0.200  | 0.124     |
| R08A | 2006 | 284 | 0  | 9       | 42.280   | P         | 0.200  | 0.239     |
| MLAC | 2006 | 284 | 0  | 9       | 42.290   | P         | 0.200  | 0.337     |
| PHL  | 2006 | 284 | 0  | 9       | 42.564   | P         | 0.200  | 0.240     |
| HELL | 2006 | 284 | 0  | 9       | 43.612   | P         | 0.200  | -0.613    |
| V05C | 2006 | 284 | 0  | 9       | 43.841   | P         | 0.200  | 0.560     |
| RCT  | 2006 | 284 | 0  | 9       | 43.869   | P         | 0.200  | -0.475    |
| Q09A | 2006 | 284 | 0  | 9       | 43.987   | P         | 0.200  | 0.081     |
| P10A | 2006 | 284 | 0  | 9       | 44.156   | P         | 0.200  | 0.126     |
| SMM  | 2006 | 284 | 0  | 9       | 45.171   | P         | 0.200  | 0.229     |
| S08C | 2006 | 284 | 0  | 9       | 45.195   | P         | 0.200  | 0.225     |
| VES  | 2006 | 284 | 0  | 9       | 45.731   | P         | 0.200  | -0.916    |
| TIN  | 2006 | 284 | 0  | 9       | 46.168   | P         | 0.200  | 0.081     |
| R09A | 2006 | 284 | 0  | 9       | 46.302   | P         | 0.200  | -0.106    |
| TPH  | 2006 | 284 | 0  | 9       | 46.351   | P         | 0.200  | -0.127    |
| MPP  | 2006 | 284 | 0  | 9       | 47.446   | P         | 0.200  | 0.253     |
| S09A | 2006 | 284 | 0  | 9       | 47.477   | P         | 0.200  | -0.127    |
| CWC  | 2006 | 284 | 0  | 9       | 48.446   | P         | 0.200  | -0.278    |
| ISA  | 2006 | 284 | 0  | 9       | 48.558   | P         | 0.200  | -1.009    |
| SBC  | 2006 | 284 | 0  | 9       | 49.118   | P         | 0.200  | 0.232     |
| R10A | 2006 | 284 | 0  | 9       | 49.167   | P         | 0.200  | 0.013     |
| Q11A | 2006 | 284 | 0  | 9       | 49.431   | P         | 0.200  | -0.168    |
| ARV  | 2006 | 284 | 0  | 9       | 49.491   | P         | 0.200  | -0.462    |
| GRA  | 2006 | 284 | 0  | 9       | 49.504   | P         | 0.200  | 0.220     |
| SCZ2 | 2006 | 284 | 0  | 9       | 50.359   | P         | 0.200  | -0.251    |
| MPM  | 2006 | 284 | 0  | 9       | 51.900   | P         | 0.200  | -0.348    |
| OSI  | 2006 | 284 | 0  | 9       | 52.108   | P         | 0.200  | -0.112    |
| FUR  | 2006 | 284 | 0  | 9       | 52.856   | P         | 0.200  | 0.072     |
| TOV  | 2006 | 284 | 0  | 9       | 52.865   | P         | 0.200  | -0.450    |
| LRL  | 2006 | 284 | 0  | 9       | 52.915   | P         | 0.200  | -0.415    |
| SLA  | 2006 | 284 | 0  | 9       | 53.280   | P         | 0.200  | -0.195    |
| EDW2 | 2006 | 284 | 0  | 9       | 53.992   | P         | 0.200  | 0.020     |
| DJJ  | 2006 | 284 | 0  | 9       | 54.277   | P         | 0.200  | -0.515    |
| DEC  | 2006 | 284 | 0  | 9       | 54.398   | P         | 0.200  | -0.478    |
| VCS  | 2006 | 284 | 0  | 9       | 55.001   | P         | 0.200  | 0.007     |
| PAS  | 2006 | 284 | 0  | 9       | 55.316   | P         | 0.200  | -0.522    |
| U10A | 2006 | 284 | 0  | 9       | 55.386   | P         | 0.200  | 0.368     |
| CHF  | 2006 | 284 | 0  | 9       | 55.550   | P         | 0.200  | -0.303    |
| MWC  | 2006 | 284 | 0  | 9       | 55.794   | P         | 0.200  | -0.446    |
| RPV  | 2006 | 284 | 0  | 9       | 55.929   | P         | 0.200  | -0.353    |
| SHO  | 2006 | 284 | 0  | 9       | 56.737   | P         | 0.200  | -0.352    |
| GSC  | 2006 | 284 | 0  | 9       | 56.836   | P         | 0.200  | -0.302    |
| BFS  | 2006 | 284 | 0  | 9       | 56.904   | P         | 0.200  | -0.659    |
| CIA  | 2006 | 284 | 0  | 9       | 56.929   | P         | 0.200  | -0.464    |
| ADO  | 2006 | 284 | 0  | 9       | 57.357   | P         | 0.200  | -0.052    |
| VTV  | 2006 | 284 | 0  | 9       | 57.364   | P         | 0.200  | -0.255    |
| RRX  | 2006 | 284 | 0  | 9       | 57.705   | P         | 0.200  | -0.039    |
| U11A | 2006 | 284 | 0  | 9       | 58.780   | P         | 0.200  | 0.249     |
| SVD  | 2006 | 284 | 0  | 9       | 59.598   | P         | 0.200  | -0.505    |
| TUQ  | 2006 | 284 | 0  | 9       | 59.839   | P         | 0.200  | -0.138    |
| BBR  | 2006 | 284 | 0  | 9       | 59.839   | P         | 0.200  | -0.662    |
| HEC  | 2006 | 284 | 0  | 10      | 0.263    | P         | 0.200  | -0.253    |
| V11A | 2006 | 284 | 0  | 10      | 0.384    | P         | 0.200  | -0.133    |
|      |      |     |    |         |          |           |        |           |
| 2007 | 110  | 1   | 45 | 56.7231 | 25.71000 | 125.10800 | 9.0000 | 324 0.000 |
| K01A | 2007 | 110 | 1  | 58      | 40.530   | P         | 0.200  | 0.296     |
| I03A | 2007 | 110 | 1  | 58      | 40.987   | P         | 0.200  | 0.274     |
| J02A | 2007 | 110 | 1  | 58      | 41.767   | P         | 0.200  | 0.223     |
| DBO  | 2007 | 110 | 1  | 58      | 43.308   | P         | 0.200  | 0.051     |
| I04A | 2007 | 110 | 1  | 58      | 43.515   | P         | 0.200  | -0.298    |
| K02A | 2007 | 110 | 1  | 58      | 43.555   | P         | 0.200  | 0.250     |
| J03A | 2007 | 110 | 1  | 58      | 43.717   | P         | 0.200  | 0.458     |

|      |      |     |   |    |        |   |       |        |
|------|------|-----|---|----|--------|---|-------|--------|
| M01C | 2007 | 110 | 1 | 58 | 44.053 | P | 0.200 | 0.397  |
| L02A | 2007 | 110 | 1 | 58 | 44.924 | P | 0.200 | 0.315  |
| HUMO | 2007 | 110 | 1 | 58 | 45.715 | P | 0.200 | 0.359  |
| J04A | 2007 | 110 | 1 | 58 | 46.372 | P | 0.200 | -0.068 |
| JCC  | 2007 | 110 | 1 | 58 | 46.998 | P | 0.200 | 0.332  |
| YBH  | 2007 | 110 | 1 | 58 | 48.883 | P | 0.200 | 0.540  |
| J05A | 2007 | 110 | 1 | 58 | 49.061 | P | 0.200 | 0.445  |
| K04A | 2007 | 110 | 1 | 58 | 49.077 | P | 0.200 | 0.127  |
| N02C | 2007 | 110 | 1 | 58 | 49.172 | P | 0.200 | 0.285  |
| M02C | 2007 | 110 | 1 | 58 | 49.394 | P | 0.200 | 0.602  |
| L04A | 2007 | 110 | 1 | 58 | 49.571 | P | 0.200 | -0.060 |
| O01C | 2007 | 110 | 1 | 58 | 49.572 | P | 0.200 | 0.561  |
| M04C | 2007 | 110 | 1 | 58 | 50.905 | P | 0.200 | -0.009 |
| M03C | 2007 | 110 | 1 | 58 | 51.212 | P | 0.200 | -0.201 |
| K05A | 2007 | 110 | 1 | 58 | 51.478 | P | 0.200 | 0.335  |
| WDC  | 2007 | 110 | 1 | 58 | 51.833 | P | 0.200 | 0.078  |
| P01C | 2007 | 110 | 1 | 58 | 52.404 | P | 0.200 | 0.148  |
| O02C | 2007 | 110 | 1 | 58 | 52.690 | P | 0.200 | 0.386  |
| L05A | 2007 | 110 | 1 | 58 | 53.411 | P | 0.200 | 0.191  |
| M05C | 2007 | 110 | 1 | 58 | 54.040 | P | 0.200 | -0.070 |
| HOPS | 2007 | 110 | 1 | 58 | 54.280 | P | 0.200 | -0.169 |
| O03C | 2007 | 110 | 1 | 58 | 54.316 | P | 0.200 | -0.560 |
| GASB | 2007 | 110 | 1 | 58 | 54.407 | P | 0.200 | 0.492  |
| HATC | 2007 | 110 | 1 | 58 | 54.505 | P | 0.200 | -0.028 |
| M06C | 2007 | 110 | 1 | 58 | 56.535 | P | 0.200 | 0.093  |
| SNG5 | 2007 | 110 | 1 | 58 | 56.595 | P | 0.200 | -0.509 |
| SUTB | 2007 | 110 | 1 | 58 | 56.904 | P | 0.200 | -0.722 |
| O04C | 2007 | 110 | 1 | 58 | 57.014 | P | 0.200 | 0.009  |
| MNRC | 2007 | 110 | 1 | 58 | 57.137 | P | 0.200 | 0.384  |
| ORV  | 2007 | 110 | 1 | 58 | 57.155 | P | 0.200 | -0.570 |
| SNG7 | 2007 | 110 | 1 | 58 | 57.166 | P | 0.200 | -0.281 |
| FARB | 2007 | 110 | 1 | 58 | 57.218 | P | 0.200 | -0.538 |
| ELFS | 2007 | 110 | 1 | 58 | 57.470 | P | 0.200 | 0.268  |
| CVS  | 2007 | 110 | 1 | 58 | 57.517 | P | 0.200 | -0.425 |
| L07A | 2007 | 110 | 1 | 58 | 58.134 | P | 0.200 | 0.506  |
| SNF6 | 2007 | 110 | 1 | 58 | 58.283 | P | 0.200 | -0.360 |
| O05C | 2007 | 110 | 1 | 58 | 58.405 | P | 0.200 | 0.128  |
| SNE4 | 2007 | 110 | 1 | 58 | 58.646 | P | 0.200 | -0.123 |
| SNE5 | 2007 | 110 | 1 | 58 | 58.807 | P | 0.200 | -0.440 |
| SNF8 | 2007 | 110 | 1 | 58 | 59.035 | P | 0.200 | -0.204 |
| SNF9 | 2007 | 110 | 1 | 58 | 59.247 | P | 0.200 | -0.078 |
| SNE7 | 2007 | 110 | 1 | 58 | 59.372 | P | 0.200 | -0.028 |
| BRK  | 2007 | 110 | 1 | 58 | 59.437 | P | 0.200 | -0.316 |
| SNE6 | 2007 | 110 | 1 | 58 | 59.545 | P | 0.200 | -0.447 |
| BKS  | 2007 | 110 | 1 | 58 | 59.658 | P | 0.200 | -0.058 |
| Q04C | 2007 | 110 | 1 | 58 | 59.748 | P | 0.200 | -0.026 |
| SND4 | 2007 | 110 | 1 | 58 | 59.846 | P | 0.200 | -0.185 |
| BRIB | 2007 | 110 | 1 | 58 | 59.853 | P | 0.200 | 0.046  |
| SND5 | 2007 | 110 | 1 | 58 | 59.942 | P | 0.200 | -0.382 |
| M07A | 2007 | 110 | 1 | 59 | 0.073  | P | 0.200 | 0.450  |
| BEK  | 2007 | 110 | 1 | 59 | 0.247  | P | 0.200 | -0.250 |
| SND7 | 2007 | 110 | 1 | 59 | 0.302  | P | 0.200 | -0.010 |
| SNE9 | 2007 | 110 | 1 | 59 | 0.424  | P | 0.200 | -0.104 |
| JRSC | 2007 | 110 | 1 | 59 | 0.568  | P | 0.200 | -0.440 |
| SNC3 | 2007 | 110 | 1 | 59 | 0.946  | P | 0.200 | 0.287  |
| BDM  | 2007 | 110 | 1 | 59 | 0.983  | P | 0.200 | 0.291  |
| SNC5 | 2007 | 110 | 1 | 59 | 1.009  | P | 0.200 | -0.241 |
| SNC4 | 2007 | 110 | 1 | 59 | 1.047  | P | 0.200 | -0.102 |
| O06A | 2007 | 110 | 1 | 59 | 1.095  | P | 0.200 | 0.055  |
| P05C | 2007 | 110 | 1 | 59 | 1.112  | P | 0.200 | -0.023 |
| SND8 | 2007 | 110 | 1 | 59 | 1.215  | P | 0.200 | -0.130 |
| BNLO | 2007 | 110 | 1 | 59 | 1.523  | P | 0.200 | -0.396 |
| SND9 | 2007 | 110 | 1 | 59 | 1.625  | P | 0.200 | 0.055  |

|      |      |     |   |    |        |   |       |        |
|------|------|-----|---|----|--------|---|-------|--------|
| SNC7 | 2007 | 110 | 1 | 59 | 1.828  | P | 0.200 | -0.051 |
| SNB3 | 2007 | 110 | 1 | 59 | 1.829  | P | 0.200 | 0.034  |
| WENL | 2007 | 110 | 1 | 59 | 1.925  | P | 0.200 | 0.017  |
| LAVA | 2007 | 110 | 1 | 59 | 1.970  | P | 0.200 | -0.144 |
| SNC6 | 2007 | 110 | 1 | 59 | 2.099  | P | 0.200 | -0.131 |
| N07B | 2007 | 110 | 1 | 59 | 2.245  | P | 0.200 | 0.341  |
| P06A | 2007 | 110 | 1 | 59 | 2.293  | P | 0.200 | 0.202  |
| SNC8 | 2007 | 110 | 1 | 59 | 2.527  | P | 0.200 | -0.017 |
| R04C | 2007 | 110 | 1 | 59 | 2.545  | P | 0.200 | -0.052 |
| SNA3 | 2007 | 110 | 1 | 59 | 3.244  | P | 0.200 | 0.169  |
| SNB7 | 2007 | 110 | 1 | 59 | 3.265  | P | 0.200 | -0.018 |
| SNB6 | 2007 | 110 | 1 | 59 | 3.335  | P | 0.200 | -0.084 |
| SNA4 | 2007 | 110 | 1 | 59 | 3.348  | P | 0.200 | -0.024 |
| S04C | 2007 | 110 | 1 | 59 | 3.434  | P | 0.200 | -0.217 |
| SNA5 | 2007 | 110 | 1 | 59 | 3.698  | P | 0.200 | -0.199 |
| WCN  | 2007 | 110 | 1 | 59 | 4.066  | P | 0.200 | 0.384  |
| SN93 | 2007 | 110 | 1 | 59 | 4.163  | P | 0.200 | 0.250  |
| SNB9 | 2007 | 110 | 1 | 59 | 4.242  | P | 0.200 | 0.281  |
| SNA7 | 2007 | 110 | 1 | 59 | 4.445  | P | 0.200 | 0.374  |
| R05C | 2007 | 110 | 1 | 59 | 4.527  | P | 0.200 | 0.124  |
| SN95 | 2007 | 110 | 1 | 59 | 4.684  | P | 0.200 | -0.055 |
| N08A | 2007 | 110 | 1 | 59 | 4.814  | P | 0.200 | 0.491  |
| SNA8 | 2007 | 110 | 1 | 59 | 4.868  | P | 0.200 | 0.091  |
| CMB  | 2007 | 110 | 1 | 59 | 4.927  | P | 0.200 | -0.049 |
| SAO  | 2007 | 110 | 1 | 59 | 5.050  | P | 0.200 | -0.048 |
| PACP | 2007 | 110 | 1 | 59 | 5.054  | P | 0.200 | 0.020  |
| SN97 | 2007 | 110 | 1 | 59 | 5.189  | P | 0.200 | 0.321  |
| SN96 | 2007 | 110 | 1 | 59 | 5.231  | P | 0.200 | 0.059  |
| SN84 | 2007 | 110 | 1 | 59 | 5.269  | P | 0.200 | -0.360 |
| HAST | 2007 | 110 | 1 | 59 | 5.454  | P | 0.200 | -0.363 |
| P07A | 2007 | 110 | 1 | 59 | 5.744  | P | 0.200 | 0.112  |
| SN85 | 2007 | 110 | 1 | 59 | 5.844  | P | 0.200 | -0.064 |
| O08A | 2007 | 110 | 1 | 59 | 6.150  | P | 0.200 | 0.571  |
| SN74 | 2007 | 110 | 1 | 59 | 6.412  | P | 0.200 | -0.309 |
| S05C | 2007 | 110 | 1 | 59 | 6.517  | P | 0.200 | -0.461 |
| R06C | 2007 | 110 | 1 | 59 | 6.949  | P | 0.200 | 0.236  |
| SN75 | 2007 | 110 | 1 | 59 | 7.135  | P | 0.200 | -0.095 |
| T05C | 2007 | 110 | 1 | 59 | 7.415  | P | 0.200 | 0.264  |
| SN63 | 2007 | 110 | 1 | 59 | 7.483  | P | 0.200 | -0.368 |
| V03C | 2007 | 110 | 1 | 59 | 7.781  | P | 0.200 | 0.187  |
| SN64 | 2007 | 110 | 1 | 59 | 7.929  | P | 0.200 | -0.129 |
| P08A | 2007 | 110 | 1 | 59 | 7.997  | P | 0.200 | 0.572  |
| SN65 | 2007 | 110 | 1 | 59 | 8.268  | P | 0.200 | 0.157  |
| U04C | 2007 | 110 | 1 | 59 | 8.379  | P | 0.200 | 0.160  |
| SN55 | 2007 | 110 | 1 | 59 | 9.022  | P | 0.200 | 0.137  |
| T06C | 2007 | 110 | 1 | 59 | 9.281  | P | 0.200 | -0.512 |
| R07C | 2007 | 110 | 1 | 59 | 9.353  | P | 0.200 | 0.129  |
| SN43 | 2007 | 110 | 1 | 59 | 9.419  | P | 0.200 | -0.314 |
| PKD  | 2007 | 110 | 1 | 59 | 9.911  | P | 0.200 | -0.169 |
| V04C | 2007 | 110 | 1 | 59 | 9.961  | P | 0.200 | 0.221  |
| Q08A | 2007 | 110 | 1 | 59 | 10.406 | P | 0.200 | 0.144  |
| U05C | 2007 | 110 | 1 | 59 | 10.517 | P | 0.200 | 0.373  |
| P09A | 2007 | 110 | 1 | 59 | 10.765 | P | 0.200 | 0.177  |
| SN34 | 2007 | 110 | 1 | 59 | 10.983 | P | 0.200 | -0.105 |
| MLAC | 2007 | 110 | 1 | 59 | 11.309 | P | 0.200 | 0.292  |
| R08A | 2007 | 110 | 1 | 59 | 11.348 | P | 0.200 | 0.399  |
| PHL  | 2007 | 110 | 1 | 59 | 11.357 | P | 0.200 | 0.035  |
| SN12 | 2007 | 110 | 1 | 59 | 11.934 | P | 0.200 | -0.287 |
| HELL | 2007 | 110 | 1 | 59 | 12.258 | P | 0.200 | -0.551 |
| V05C | 2007 | 110 | 1 | 59 | 12.418 | P | 0.200 | 0.363  |
| P10A | 2007 | 110 | 1 | 59 | 12.530 | P | 0.200 | 0.168  |
| Q09A | 2007 | 110 | 1 | 59 | 12.581 | P | 0.200 | 0.262  |
| SN14 | 2007 | 110 | 1 | 59 | 12.714 | P | 0.200 | 0.145  |

|      |      |     |   |    |        |   |       |        |
|------|------|-----|---|----|--------|---|-------|--------|
| SMM  | 2007 | 110 | 1 | 59 | 13.542 | P | 0.200 | 0.116  |
| VES  | 2007 | 110 | 1 | 59 | 13.567 | P | 0.200 | -1.183 |
| S08C | 2007 | 110 | 1 | 59 | 13.671 | P | 0.200 | 0.292  |
| TIN  | 2007 | 110 | 1 | 59 | 14.305 | P | 0.200 | 0.021  |
| R09A | 2007 | 110 | 1 | 59 | 14.488 | P | 0.200 | 0.112  |
| Q10A | 2007 | 110 | 1 | 59 | 14.782 | P | 0.200 | 0.166  |
| S09A | 2007 | 110 | 1 | 59 | 15.567 | P | 0.200 | 0.184  |
| BAK  | 2007 | 110 | 1 | 59 | 15.681 | P | 0.200 | -0.258 |
| ISA  | 2007 | 110 | 1 | 59 | 16.383 | P | 0.200 | -0.669 |
| R10A | 2007 | 110 | 1 | 59 | 16.655 | P | 0.200 | 0.087  |
| CWC  | 2007 | 110 | 1 | 59 | 16.763 | P | 0.200 | 0.337  |
| S10A | 2007 | 110 | 1 | 59 | 16.984 | P | 0.200 | 0.320  |
| GRA  | 2007 | 110 | 1 | 59 | 17.003 | P | 0.200 | 0.276  |
| Q11A | 2007 | 110 | 1 | 59 | 17.027 | P | 0.200 | 0.208  |
| ARV  | 2007 | 110 | 1 | 59 | 17.293 | P | 0.200 | -0.058 |
| SCZ2 | 2007 | 110 | 1 | 59 | 17.476 | P | 0.200 | -0.412 |
| R11A | 2007 | 110 | 1 | 59 | 18.718 | P | 0.200 | 0.467  |
| LGU  | 2007 | 110 | 1 | 59 | 18.783 | P | 0.200 | -0.744 |
| MPM  | 2007 | 110 | 1 | 59 | 19.052 | P | 0.200 | -0.171 |
| OSI  | 2007 | 110 | 1 | 59 | 19.234 | P | 0.200 | -0.009 |
| FUR  | 2007 | 110 | 1 | 59 | 19.675 | P | 0.200 | 0.180  |
| S11A | 2007 | 110 | 1 | 59 | 20.034 | P | 0.200 | 0.165  |
| LRL  | 2007 | 110 | 1 | 59 | 20.099 | P | 0.200 | 0.028  |
| SNCC | 2007 | 110 | 1 | 59 | 20.135 | P | 0.200 | -0.289 |
| TPNV | 2007 | 110 | 1 | 59 | 20.280 | P | 0.200 | -0.086 |
| EDW2 | 2007 | 110 | 1 | 59 | 20.730 | P | 0.200 | 0.149  |
| DEC  | 2007 | 110 | 1 | 59 | 20.834 | P | 0.200 | -0.505 |
| DJJ  | 2007 | 110 | 1 | 59 | 20.858 | P | 0.200 | -0.398 |
| VCS  | 2007 | 110 | 1 | 59 | 21.423 | P | 0.200 | -0.029 |
| PASC | 2007 | 110 | 1 | 59 | 21.505 | P | 0.200 | -0.413 |
| U10A | 2007 | 110 | 1 | 59 | 21.712 | P | 0.200 | 0.396  |
| USC  | 2007 | 110 | 1 | 59 | 21.904 | P | 0.200 | -0.106 |
| CHF  | 2007 | 110 | 1 | 59 | 21.904 | P | 0.200 | -0.219 |
| RPV  | 2007 | 110 | 1 | 59 | 21.979 | P | 0.200 | -0.506 |
| MWC  | 2007 | 110 | 1 | 59 | 22.100 | P | 0.200 | -0.379 |
| FMP  | 2007 | 110 | 1 | 59 | 22.349 | P | 0.200 | -0.362 |
| CIA  | 2007 | 110 | 1 | 59 | 22.758 | P | 0.200 | -0.631 |
| SHO  | 2007 | 110 | 1 | 59 | 22.953 | P | 0.200 | -0.055 |
| T11A | 2007 | 110 | 1 | 59 | 22.964 | P | 0.200 | 0.604  |
| GSC  | 2007 | 110 | 1 | 59 | 22.984 | P | 0.200 | -0.138 |
| BFS  | 2007 | 110 | 1 | 59 | 23.368 | P | 0.200 | -0.136 |
| VTV  | 2007 | 110 | 1 | 59 | 23.439 | P | 0.200 | -0.075 |
| RRX  | 2007 | 110 | 1 | 59 | 23.579 | P | 0.200 | -0.010 |
| SDD  | 2007 | 110 | 1 | 59 | 25.100 | P | 0.200 | -0.006 |
| SVD  | 2007 | 110 | 1 | 59 | 25.310 | P | 0.200 | -0.248 |
| TUQ  | 2007 | 110 | 1 | 59 | 25.456 | P | 0.200 | 0.106  |
| BBR  | 2007 | 110 | 1 | 59 | 25.619 | P | 0.200 | -0.319 |
| HEC  | 2007 | 110 | 1 | 59 | 25.865 | P | 0.200 | 0.008  |
| V11A | 2007 | 110 | 1 | 59 | 26.025 | P | 0.200 | 0.240  |

|      |      |     |    |         |          |           |          |        |        |
|------|------|-----|----|---------|----------|-----------|----------|--------|--------|
| 2005 | 325  | 15  | 36 | 30.4872 | 31.01900 | 129.99699 | 145.0000 | 38     | -0.003 |
| I03A | 2005 | 325 | 15 | 48      | 23.297   | P         | 0.200    | 0.514  |        |
| HUMO | 2005 | 325 | 15 | 48      | 28.641   | P         | 0.200    | 0.685  |        |
| YBH  | 2005 | 325 | 15 | 48      | 31.883   | P         | 0.200    | 0.548  |        |
| M02C | 2005 | 325 | 15 | 48      | 32.719   | P         | 0.200    | 0.864  |        |
| M03C | 2005 | 325 | 15 | 48      | 34.598   | P         | 0.200    | -0.137 |        |
| WDC  | 2005 | 325 | 15 | 48      | 35.384   | P         | 0.200    | 0.194  |        |
| P01C | 2005 | 325 | 15 | 48      | 35.807   | P         | 0.200    | -0.032 |        |
| M05C | 2005 | 325 | 15 | 48      | 37.678   | P         | 0.200    | 0.010  |        |
| HATC | 2005 | 325 | 15 | 48      | 38.084   | P         | 0.200    | -0.108 |        |
| GASB | 2005 | 325 | 15 | 48      | 38.174   | P         | 0.200    | 0.565  |        |
| M06C | 2005 | 325 | 15 | 48      | 40.456   | P         | 0.200    | 0.213  |        |
| SUTB | 2005 | 325 | 15 | 48      | 40.962   | P         | 0.200    | -0.734 |        |

|      |      |     |    |    |        |   |       |        |
|------|------|-----|----|----|--------|---|-------|--------|
| O04C | 2005 | 325 | 15 | 48 | 41.005 | P | 0.200 | 0.084  |
| ORV  | 2005 | 325 | 15 | 48 | 41.083 | P | 0.200 | -0.670 |
| ELFS | 2005 | 325 | 15 | 48 | 41.511 | P | 0.200 | 0.397  |
| FARB | 2005 | 325 | 15 | 48 | 41.564 | P | 0.200 | -0.449 |
| CVS  | 2005 | 325 | 15 | 48 | 41.640 | P | 0.200 | -0.481 |
| O05C | 2005 | 325 | 15 | 48 | 42.302 | P | 0.200 | -0.045 |
| Q03C | 2005 | 325 | 15 | 48 | 43.409 | P | 0.200 | 0.747  |
| BRK  | 2005 | 325 | 15 | 48 | 43.709 | P | 0.200 | -0.417 |
| BKS  | 2005 | 325 | 15 | 48 | 43.935 | P | 0.200 | -0.168 |
| Q04C | 2005 | 325 | 15 | 48 | 44.131 | P | 0.200 | 0.060  |
| BRIB | 2005 | 325 | 15 | 48 | 44.187 | P | 0.200 | -0.017 |
| JRSC | 2005 | 325 | 15 | 48 | 45.042 | P | 0.200 | -0.500 |
| P05C | 2005 | 325 | 15 | 48 | 45.336 | P | 0.200 | -0.139 |
| BNLO | 2005 | 325 | 15 | 48 | 45.995 | P | 0.200 | -0.550 |
| LAVA | 2005 | 325 | 15 | 48 | 46.275 | P | 0.200 | -0.300 |
| WENL | 2005 | 325 | 15 | 48 | 46.440 | P | 0.200 | -0.042 |
| R04C | 2005 | 325 | 15 | 48 | 46.952 | P | 0.200 | -0.209 |
| S04C | 2005 | 325 | 15 | 48 | 48.078 | P | 0.200 | -0.253 |
| R05C | 2005 | 325 | 15 | 48 | 49.090 | P | 0.200 | 0.078  |
| SN95 | 2005 | 325 | 15 | 48 | 49.265 | P | 0.200 | -0.147 |
| CMB  | 2005 | 325 | 15 | 48 | 49.613 | P | 0.200 | -0.092 |
| PACP | 2005 | 325 | 15 | 48 | 49.850 | P | 0.200 | -0.021 |
| SN84 | 2005 | 325 | 15 | 48 | 50.020 | P | 0.200 | -0.353 |
| SN71 | 2005 | 325 | 15 | 48 | 50.254 | P | 0.200 | -0.553 |
| HAST | 2005 | 325 | 15 | 48 | 50.474 | P | 0.200 | -0.300 |
| SN85 | 2005 | 325 | 15 | 48 | 50.654 | P | 0.200 | -0.004 |
| SN86 | 2005 | 325 | 15 | 48 | 50.756 | P | 0.200 | 0.152  |
| SN73 | 2005 | 325 | 15 | 48 | 50.905 | P | 0.200 | -0.418 |
| SN74 | 2005 | 325 | 15 | 48 | 51.201 | P | 0.200 | -0.343 |
| S05C | 2005 | 325 | 15 | 48 | 51.403 | P | 0.200 | -0.497 |
| S06C | 2005 | 325 | 15 | 48 | 51.667 | P | 0.200 | -0.388 |
| R06C | 2005 | 325 | 15 | 48 | 51.787 | P | 0.200 | 0.292  |
| SN62 | 2005 | 325 | 15 | 48 | 51.832 | P | 0.200 | -0.523 |
| SN76 | 2005 | 325 | 15 | 48 | 52.014 | P | 0.200 | 0.172  |
| SN51 | 2005 | 325 | 15 | 48 | 52.890 | P | 0.200 | -0.072 |
| V03C | 2005 | 325 | 15 | 48 | 52.962 | P | 0.200 | 0.255  |
| SN52 | 2005 | 325 | 15 | 48 | 53.051 | P | 0.200 | -0.508 |
| SN66 | 2005 | 325 | 15 | 48 | 53.139 | P | 0.200 | 0.121  |
| SN53 | 2005 | 325 | 15 | 48 | 53.293 | P | 0.200 | -0.504 |
| SN67 | 2005 | 325 | 15 | 48 | 53.491 | P | 0.200 | 0.345  |
| SN54 | 2005 | 325 | 15 | 48 | 53.555 | P | 0.200 | -0.163 |
| SN55 | 2005 | 325 | 15 | 48 | 53.899 | P | 0.200 | 0.050  |
| SN56 | 2005 | 325 | 15 | 48 | 54.383 | P | 0.200 | 0.158  |
| R07C | 2005 | 325 | 15 | 48 | 54.426 | P | 0.200 | 0.254  |
| T06C | 2005 | 325 | 15 | 48 | 54.465 | P | 0.200 | -0.436 |
| SN43 | 2005 | 325 | 15 | 48 | 54.489 | P | 0.200 | -0.296 |
| SN57 | 2005 | 325 | 15 | 48 | 54.566 | P | 0.200 | 0.534  |
| SN44 | 2005 | 325 | 15 | 48 | 55.029 | P | 0.200 | 0.014  |
| PKD  | 2005 | 325 | 15 | 48 | 55.180 | P | 0.200 | -0.149 |
| V04C | 2005 | 325 | 15 | 48 | 55.258 | P | 0.200 | 0.246  |
| RAMR | 2005 | 325 | 15 | 48 | 55.258 | P | 0.200 | 0.249  |
| SN45 | 2005 | 325 | 15 | 48 | 55.359 | P | 0.200 | 0.220  |
| SN22 | 2005 | 325 | 15 | 48 | 55.605 | P | 0.200 | -0.537 |
| SN48 | 2005 | 325 | 15 | 48 | 55.656 | P | 0.200 | 0.269  |
| SN47 | 2005 | 325 | 15 | 48 | 55.736 | P | 0.200 | 0.253  |
| SN46 | 2005 | 325 | 15 | 48 | 55.877 | P | 0.200 | 0.324  |
| MNV  | 2005 | 325 | 15 | 48 | 55.975 | P | 0.200 | 0.227  |
| SN34 | 2005 | 325 | 15 | 48 | 56.027 | P | 0.200 | -0.177 |
| SN23 | 2005 | 325 | 15 | 48 | 56.085 | P | 0.200 | -0.345 |
| SN11 | 2005 | 325 | 15 | 48 | 56.313 | P | 0.200 | -0.586 |
| SN38 | 2005 | 325 | 15 | 48 | 56.589 | P | 0.200 | 0.316  |
| SN37 | 2005 | 325 | 15 | 48 | 56.635 | P | 0.200 | 0.202  |
| SN36 | 2005 | 325 | 15 | 48 | 56.765 | P | 0.200 | 0.322  |



|      |      |     |    |    |        |   |       |        |
|------|------|-----|----|----|--------|---|-------|--------|
| SN25 | 2005 | 325 | 15 | 48 | 57.436 | P | 0.200 | 0.090  |
| SN26 | 2005 | 325 | 15 | 48 | 57.585 | P | 0.200 | 0.451  |
| SN28 | 2005 | 325 | 15 | 48 | 57.698 | P | 0.200 | 0.478  |
| RCT  | 2005 | 325 | 15 | 48 | 57.722 | P | 0.200 | -0.496 |
| V05C | 2005 | 325 | 15 | 48 | 57.853 | P | 0.200 | 0.440  |
| SN15 | 2005 | 325 | 15 | 48 | 58.000 | P | 0.200 | 0.132  |
| S08C | 2005 | 325 | 15 | 48 | 59.074 | P | 0.200 | 0.464  |
| SMM  | 2005 | 325 | 15 | 48 | 59.095 | P | 0.200 | 0.200  |
| VES  | 2005 | 325 | 15 | 48 | 59.161 | P | 0.200 | -1.048 |
| SDP  | 2005 | 325 | 15 | 48 | 59.310 | P | 0.200 | -0.201 |
| TIN  | 2005 | 325 | 15 | 48 | 59.796 | P | 0.200 | 0.194  |
| TPH  | 2005 | 325 | 15 | 48 | 59.865 | P | 0.200 | 0.167  |
| MPP  | 2005 | 325 | 15 | 49 | 1.040  | P | 0.200 | 0.244  |
| CWC  | 2005 | 325 | 15 | 49 | 1.788  | P | 0.200 | -0.060 |
| SBC  | 2005 | 325 | 15 | 49 | 2.418  | P | 0.200 | 0.184  |
| ISA  | 2005 | 325 | 15 | 49 | 2.463  | P | 0.200 | -0.116 |
| GRA  | 2005 | 325 | 15 | 49 | 2.691  | P | 0.200 | 0.574  |
| ARV  | 2005 | 325 | 15 | 49 | 2.842  | P | 0.200 | -0.108 |
| SCZ2 | 2005 | 325 | 15 | 49 | 3.425  | P | 0.200 | -0.204 |
| LGU  | 2005 | 325 | 15 | 49 | 4.845  | P | 0.200 | -0.433 |
| MPM  | 2005 | 325 | 15 | 49 | 4.934  | P | 0.200 | 0.184  |
| OSI  | 2005 | 325 | 15 | 49 | 5.179  | P | 0.200 | 0.259  |
| FUR  | 2005 | 325 | 15 | 49 | 5.484  | P | 0.200 | 0.474  |
| LRL  | 2005 | 325 | 15 | 49 | 5.762  | P | 0.200 | 0.074  |
| TPNV | 2005 | 325 | 15 | 49 | 6.107  | P | 0.200 | 0.266  |
| EDW2 | 2005 | 325 | 15 | 49 | 6.622  | P | 0.200 | 0.351  |
| DEC  | 2005 | 325 | 15 | 49 | 6.812  | P | 0.200 | -0.307 |
| FMP  | 2005 | 325 | 15 | 49 | 8.621  | P | 0.200 | 0.056  |
| CIA  | 2005 | 325 | 15 | 49 | 8.927  | P | 0.200 | -0.357 |
| SHO  | 2005 | 325 | 15 | 49 | 8.937  | P | 0.200 | 0.299  |
| GSC  | 2005 | 325 | 15 | 49 | 9.028  | P | 0.200 | 0.230  |
| BFS  | 2005 | 325 | 15 | 49 | 9.235  | P | 0.200 | -0.071 |
| BBR  | 2005 | 325 | 15 | 49 | 11.423 | P | 0.200 | -0.359 |
| TUQ  | 2005 | 325 | 15 | 49 | 11.482 | P | 0.200 | 0.407  |
| HEC  | 2005 | 325 | 15 | 49 | 11.911 | P | 0.200 | 0.272  |

|      |      |     |    |         |          |           |         |        |        |
|------|------|-----|----|---------|----------|-----------|---------|--------|--------|
| 2006 | 167  | 17  | 10 | 41.1065 | 40.34900 | 143.71201 | 30.0000 | 139    | -0.008 |
| L02A | 2006 | 167 | 17 | 21      | 25.854   | P         | 0.200   | 0.411  |        |
| HUMO | 2006 | 167 | 17 | 21      | 27.004   | P         | 0.200   | 0.604  |        |
| JCC  | 2006 | 167 | 17 | 21      | 29.105   | P         | 0.200   | 0.690  |        |
| YBH  | 2006 | 167 | 17 | 21      | 31.199   | P         | 0.200   | 0.669  |        |
| K04A | 2006 | 167 | 17 | 21      | 31.623   | P         | 0.200   | 0.364  |        |
| N02C | 2006 | 167 | 17 | 21      | 31.741   | P         | 0.200   | 0.383  |        |
| M02C | 2006 | 167 | 17 | 21      | 31.999   | P         | 0.200   | 0.842  |        |
| L04A | 2006 | 167 | 17 | 21      | 32.523   | P         | 0.200   | 0.320  |        |
| M04C | 2006 | 167 | 17 | 21      | 34.184   | P         | 0.200   | 0.286  |        |
| M03C | 2006 | 167 | 17 | 21      | 34.705   | P         | 0.200   | 0.131  |        |
| WDC  | 2006 | 167 | 17 | 21      | 35.398   | P         | 0.200   | 0.188  |        |
| P01C | 2006 | 167 | 17 | 21      | 36.210   | P         | 0.200   | 0.181  |        |
| O02C | 2006 | 167 | 17 | 21      | 36.415   | P         | 0.200   | 0.546  |        |
| M05C | 2006 | 167 | 17 | 21      | 38.255   | P         | 0.200   | 0.133  |        |
| GASB | 2006 | 167 | 17 | 21      | 38.778   | P         | 0.200   | 0.665  |        |
| HATC | 2006 | 167 | 17 | 21      | 38.989   | P         | 0.200   | 0.192  |        |
| O03C | 2006 | 167 | 17 | 21      | 39.255   | P         | 0.200   | -0.147 |        |
| M06C | 2006 | 167 | 17 | 21      | 41.593   | P         | 0.200   | 0.288  |        |
| O04C | 2006 | 167 | 17 | 21      | 42.292   | P         | 0.200   | 0.167  |        |
| ORV  | 2006 | 167 | 17 | 21      | 42.392   | P         | 0.200   | -0.741 |        |
| MNRC | 2006 | 167 | 17 | 21      | 42.408   | P         | 0.200   | 0.458  |        |
| SUTB | 2006 | 167 | 17 | 21      | 42.444   | P         | 0.200   | -0.680 |        |
| ELFS | 2006 | 167 | 17 | 21      | 42.751   | P         | 0.200   | 0.382  |        |
| O05C | 2006 | 167 | 17 | 21      | 43.942   | P         | 0.200   | 0.023  |        |
| M07A | 2006 | 167 | 17 | 21      | 45.848   | P         | 0.200   | 0.290  |        |
| BEK  | 2006 | 167 | 17 | 21      | 46.201   | P         | 0.200   | -0.500 |        |

|      |      |     |    |    |        |   |       |        |
|------|------|-----|----|----|--------|---|-------|--------|
| BRIB | 2006 | 167 | 17 | 21 | 46.277 | P | 0.200 | -0.029 |
| P05C | 2006 | 167 | 17 | 21 | 47.434 | P | 0.200 | -0.268 |
| O06A | 2006 | 167 | 17 | 21 | 47.508 | P | 0.200 | 0.003  |
| BNLO | 2006 | 167 | 17 | 21 | 48.637 | P | 0.200 | -0.554 |
| N07B | 2006 | 167 | 17 | 21 | 48.673 | P | 0.200 | 0.105  |
| LAVA | 2006 | 167 | 17 | 21 | 48.707 | P | 0.200 | -0.356 |
| P06A | 2006 | 167 | 17 | 21 | 49.156 | P | 0.200 | 0.228  |
| R04C | 2006 | 167 | 17 | 21 | 49.495 | P | 0.200 | -0.383 |
| S04C | 2006 | 167 | 17 | 21 | 51.133 | P | 0.200 | -0.130 |
| WCN  | 2006 | 167 | 17 | 21 | 51.171 | P | 0.200 | 0.159  |
| O07A | 2006 | 167 | 17 | 21 | 51.234 | P | 0.200 | 0.066  |
| N08A | 2006 | 167 | 17 | 21 | 51.809 | P | 0.200 | 0.075  |
| R05C | 2006 | 167 | 17 | 21 | 51.971 | P | 0.200 | -0.035 |
| CMB  | 2006 | 167 | 17 | 21 | 52.894 | P | 0.200 | -0.049 |
| PACP | 2006 | 167 | 17 | 21 | 53.293 | P | 0.200 | 0.083  |
| SN84 | 2006 | 167 | 17 | 21 | 53.332 | P | 0.200 | -0.354 |
| SN71 | 2006 | 167 | 17 | 21 | 53.601 | P | 0.200 | -0.691 |
| P07A | 2006 | 167 | 17 | 21 | 53.757 | P | 0.200 | 0.294  |
| SN85 | 2006 | 167 | 17 | 21 | 53.860 | P | 0.200 | -0.157 |
| O08A | 2006 | 167 | 17 | 21 | 53.877 | P | 0.200 | 0.448  |
| HAST | 2006 | 167 | 17 | 21 | 54.089 | P | 0.200 | -0.284 |
| SN73 | 2006 | 167 | 17 | 21 | 54.527 | P | 0.200 | -0.377 |
| S05C | 2006 | 167 | 17 | 21 | 55.114 | P | 0.200 | -0.543 |
| R06C | 2006 | 167 | 17 | 21 | 55.327 | P | 0.200 | 0.283  |
| S06C | 2006 | 167 | 17 | 21 | 55.579 | P | 0.200 | -0.187 |
| SN76 | 2006 | 167 | 17 | 21 | 55.672 | P | 0.200 | 0.220  |
| P08A | 2006 | 167 | 17 | 21 | 56.438 | P | 0.200 | 0.587  |
| BMN  | 2006 | 167 | 17 | 21 | 56.528 | P | 0.200 | 0.095  |
| SN64 | 2006 | 167 | 17 | 21 | 56.617 | P | 0.200 | -0.205 |
| SN66 | 2006 | 167 | 17 | 21 | 56.994 | P | 0.200 | 0.114  |
| SN51 | 2006 | 167 | 17 | 21 | 57.005 | P | 0.200 | 0.008  |
| SN52 | 2006 | 167 | 17 | 21 | 57.221 | P | 0.200 | -0.477 |
| SN67 | 2006 | 167 | 17 | 21 | 57.309 | P | 0.200 | 0.217  |
| U04C | 2006 | 167 | 17 | 21 | 57.761 | P | 0.200 | 0.253  |
| SN55 | 2006 | 167 | 17 | 21 | 57.821 | P | 0.200 | -0.112 |
| O09A | 2006 | 167 | 17 | 21 | 57.904 | P | 0.200 | 0.534  |
| R07C | 2006 | 167 | 17 | 21 | 58.500 | P | 0.200 | 0.229  |
| SN57 | 2006 | 167 | 17 | 21 | 58.557 | P | 0.200 | 0.360  |
| T06C | 2006 | 167 | 17 | 21 | 59.049 | P | 0.200 | -0.271 |
| SN44 | 2006 | 167 | 17 | 21 | 59.356 | P | 0.200 | -0.050 |
| Q08A | 2006 | 167 | 17 | 21 | 59.497 | P | 0.200 | -0.073 |
| PKD  | 2006 | 167 | 17 | 21 | 59.817 | P | 0.200 | -0.148 |
| SN48 | 2006 | 167 | 17 | 21 | 59.912 | P | 0.200 | 0.124  |
| V04C | 2006 | 167 | 17 | 22 | 0.050  | P | 0.200 | 0.391  |
| SN47 | 2006 | 167 | 17 | 22 | 0.106  | P | 0.200 | 0.235  |
| SN21 | 2006 | 167 | 17 | 22 | 0.182  | P | 0.200 | -0.604 |
| MNV  | 2006 | 167 | 17 | 22 | 0.330  | P | 0.200 | 0.081  |
| SN22 | 2006 | 167 | 17 | 22 | 0.428  | P | 0.200 | -0.380 |
| R08A | 2006 | 167 | 17 | 22 | 0.862  | P | 0.200 | 0.251  |
| SN38 | 2006 | 167 | 17 | 22 | 1.121  | P | 0.200 | 0.187  |
| SN11 | 2006 | 167 | 17 | 22 | 1.145  | P | 0.200 | -0.711 |
| SN37 | 2006 | 167 | 17 | 22 | 1.248  | P | 0.200 | 0.143  |
| SN36 | 2006 | 167 | 17 | 22 | 1.401  | P | 0.200 | 0.258  |
| PHL  | 2006 | 167 | 17 | 22 | 1.899  | P | 0.200 | 0.164  |
| SN25 | 2006 | 167 | 17 | 22 | 2.213  | P | 0.200 | -0.017 |
| SN26 | 2006 | 167 | 17 | 22 | 2.361  | P | 0.200 | 0.335  |
| SN28 | 2006 | 167 | 17 | 22 | 2.374  | P | 0.200 | 0.266  |
| Q09A | 2006 | 167 | 17 | 22 | 2.439  | P | 0.200 | 0.097  |
| SN15 | 2006 | 167 | 17 | 22 | 3.008  | P | 0.200 | 0.127  |
| SN16 | 2006 | 167 | 17 | 22 | 3.948  | P | 0.200 | 0.078  |
| S08C | 2006 | 167 | 17 | 22 | 3.972  | P | 0.200 | 0.196  |
| SMM  | 2006 | 167 | 17 | 22 | 4.631  | P | 0.200 | 0.257  |
| VES  | 2006 | 167 | 17 | 22 | 4.986  | P | 0.200 | -0.940 |

|      |      |     |    |    |        |   |       |        |
|------|------|-----|----|----|--------|---|-------|--------|
| TPH  | 2006 | 167 | 17 | 22 | 5.070  | P | 0.200 | -0.057 |
| TIN  | 2006 | 167 | 17 | 22 | 5.173  | P | 0.200 | 0.155  |
| S09A | 2006 | 167 | 17 | 22 | 6.346  | P | 0.200 | -0.010 |
| MPP  | 2006 | 167 | 17 | 22 | 7.030  | P | 0.200 | 0.283  |
| CWC  | 2006 | 167 | 17 | 22 | 7.779  | P | 0.200 | -0.060 |
| Q11A | 2006 | 167 | 17 | 22 | 7.950  | P | 0.200 | -0.102 |
| ISA  | 2006 | 167 | 17 | 22 | 7.965  | P | 0.200 | -0.935 |
| GRA  | 2006 | 167 | 17 | 22 | 8.482  | P | 0.200 | 0.245  |
| ARV  | 2006 | 167 | 17 | 22 | 8.854  | P | 0.200 | -0.589 |
| MPM  | 2006 | 167 | 17 | 22 | 11.246 | P | 0.200 | -0.219 |
| OSI  | 2006 | 167 | 17 | 22 | 11.770 | P | 0.200 | -0.082 |
| LGU  | 2006 | 167 | 17 | 22 | 11.792 | P | 0.200 | -0.551 |
| FUR  | 2006 | 167 | 17 | 22 | 12.038 | P | 0.200 | 0.146  |
| LRL  | 2006 | 167 | 17 | 22 | 12.377 | P | 0.200 | -0.338 |
| EDW2 | 2006 | 167 | 17 | 22 | 13.576 | P | 0.200 | 0.051  |
| DJJ  | 2006 | 167 | 17 | 22 | 14.036 | P | 0.200 | -0.535 |
| DEC  | 2006 | 167 | 17 | 22 | 14.214 | P | 0.200 | -0.398 |
| PAS  | 2006 | 167 | 17 | 22 | 15.062 | P | 0.200 | -0.537 |
| CHF  | 2006 | 167 | 17 | 22 | 15.392 | P | 0.200 | -0.176 |
| MWC  | 2006 | 167 | 17 | 22 | 15.567 | P | 0.200 | -0.417 |
| SHO  | 2006 | 167 | 17 | 22 | 16.185 | P | 0.200 | -0.176 |
| GSC  | 2006 | 167 | 17 | 22 | 16.351 | P | 0.200 | -0.223 |
| BFS  | 2006 | 167 | 17 | 22 | 16.772 | P | 0.200 | -0.531 |
| RRX  | 2006 | 167 | 17 | 22 | 17.342 | P | 0.200 | 0.036  |
| TUQ  | 2006 | 167 | 17 | 22 | 19.320 | P | 0.200 | -0.062 |
| HEC  | 2006 | 167 | 17 | 22 | 19.865 | P | 0.200 | -0.226 |

|      |     |    |   |         |          |           |          |     |        |
|------|-----|----|---|---------|----------|-----------|----------|-----|--------|
| 2006 | 162 | 20 | 1 | 26.5892 | 33.12900 | 131.14101 | 139.8000 | 136 | -0.007 |
|------|-----|----|---|---------|----------|-----------|----------|-----|--------|

|      |      |     |    |    |        |   |       |        |
|------|------|-----|----|----|--------|---|-------|--------|
| K01A | 2006 | 162 | 20 | 13 | 7.822  | P | 0.200 | 0.583  |
| I03A | 2006 | 162 | 20 | 13 | 8.143  | P | 0.200 | 0.570  |
| J02A | 2006 | 162 | 20 | 13 | 9.003  | P | 0.200 | 0.409  |
| DBO  | 2006 | 162 | 20 | 13 | 10.823 | P | 0.200 | 0.274  |
| K02A | 2006 | 162 | 20 | 13 | 11.002 | P | 0.200 | 0.322  |
| J03A | 2006 | 162 | 20 | 13 | 11.108 | P | 0.200 | 0.581  |
| M01C | 2006 | 162 | 20 | 13 | 11.873 | P | 0.200 | 0.629  |
| L02A | 2006 | 162 | 20 | 13 | 12.675 | P | 0.200 | 0.463  |
| HUMO | 2006 | 162 | 20 | 13 | 13.526 | P | 0.200 | 0.559  |
| JCC  | 2006 | 162 | 20 | 13 | 15.417 | P | 0.200 | 0.611  |
| YBH  | 2006 | 162 | 20 | 13 | 17.075 | P | 0.200 | 0.564  |
| K04A | 2006 | 162 | 20 | 13 | 17.238 | P | 0.200 | 0.202  |
| N02C | 2006 | 162 | 20 | 13 | 17.658 | P | 0.200 | 0.366  |
| M02C | 2006 | 162 | 20 | 13 | 17.805 | P | 0.200 | 0.733  |
| L04A | 2006 | 162 | 20 | 13 | 18.042 | P | 0.200 | 0.169  |
| O01C | 2006 | 162 | 20 | 13 | 18.221 | P | 0.200 | 0.643  |
| M04C | 2006 | 162 | 20 | 13 | 19.542 | P | 0.200 | 0.177  |
| M03C | 2006 | 162 | 20 | 13 | 20.002 | P | 0.200 | 0.001  |
| WDC  | 2006 | 162 | 20 | 13 | 20.673 | P | 0.200 | 0.119  |
| P01C | 2006 | 162 | 20 | 13 | 21.426 | P | 0.200 | 0.096  |
| O02C | 2006 | 162 | 20 | 13 | 21.646 | P | 0.200 | 0.443  |
| M05C | 2006 | 162 | 20 | 13 | 22.934 | P | 0.200 | -0.069 |
| HATC | 2006 | 162 | 20 | 13 | 23.657 | P | 0.200 | 0.058  |
| HOPS | 2006 | 162 | 20 | 13 | 23.688 | P | 0.200 | -0.171 |
| O03C | 2006 | 162 | 20 | 13 | 23.727 | P | 0.200 | -0.426 |
| GASB | 2006 | 162 | 20 | 13 | 23.753 | P | 0.200 | 0.631  |
| M06C | 2006 | 162 | 20 | 13 | 25.882 | P | 0.200 | 0.226  |
| MCCM | 2006 | 162 | 20 | 13 | 26.444 | P | 0.200 | -0.424 |
| O04C | 2006 | 162 | 20 | 13 | 26.534 | P | 0.200 | 0.099  |
| SUTB | 2006 | 162 | 20 | 13 | 26.623 | P | 0.200 | -0.717 |
| ORV  | 2006 | 162 | 20 | 13 | 26.659 | P | 0.200 | -0.699 |
| MNRC | 2006 | 162 | 20 | 13 | 26.714 | P | 0.200 | 0.296  |
| ELFS | 2006 | 162 | 20 | 13 | 26.915 | P | 0.200 | 0.311  |
| FARB | 2006 | 162 | 20 | 13 | 27.301 | P | 0.200 | -0.529 |
| CVS  | 2006 | 162 | 20 | 13 | 27.503 | P | 0.200 | -0.365 |

|      |      |     |    |    |        |   |       |        |
|------|------|-----|----|----|--------|---|-------|--------|
| O05C | 2006 | 162 | 20 | 13 | 27.851 | P | 0.200 | -0.085 |
| Q03C | 2006 | 162 | 20 | 13 | 29.154 | P | 0.200 | 0.755  |
| BRK  | 2006 | 162 | 20 | 13 | 29.565 | P | 0.200 | -0.403 |
| M07A | 2006 | 162 | 20 | 13 | 29.657 | P | 0.200 | 0.484  |
| BKS  | 2006 | 162 | 20 | 13 | 29.742 | P | 0.200 | -0.213 |
| Q04C | 2006 | 162 | 20 | 13 | 29.835 | P | 0.200 | 0.019  |
| BRIB | 2006 | 162 | 20 | 13 | 29.993 | P | 0.200 | -0.050 |
| BEK  | 2006 | 162 | 20 | 13 | 30.013 | P | 0.200 | -0.350 |
| JRSC | 2006 | 162 | 20 | 13 | 30.829 | P | 0.200 | -0.640 |
| BDM  | 2006 | 162 | 20 | 13 | 30.942 | P | 0.200 | -0.057 |
| O06A | 2006 | 162 | 20 | 13 | 31.036 | P | 0.200 | 0.093  |
| P05C | 2006 | 162 | 20 | 13 | 31.065 | P | 0.200 | -0.135 |
| BNLO | 2006 | 162 | 20 | 13 | 31.984 | P | 0.200 | -0.533 |
| LAVA | 2006 | 162 | 20 | 13 | 32.037 | P | 0.200 | -0.341 |
| N07B | 2006 | 162 | 20 | 13 | 32.066 | P | 0.200 | 0.286  |
| WENL | 2006 | 162 | 20 | 13 | 32.274 | P | 0.200 | -0.129 |
| P06A | 2006 | 162 | 20 | 13 | 32.435 | P | 0.200 | 0.258  |
| R04C | 2006 | 162 | 20 | 13 | 32.734 | P | 0.200 | -0.293 |
| MHC  | 2006 | 162 | 20 | 13 | 33.665 | P | 0.200 | -0.179 |
| S04C | 2006 | 162 | 20 | 13 | 34.110 | P | 0.200 | -0.186 |
| O07A | 2006 | 162 | 20 | 13 | 34.264 | P | 0.200 | 0.239  |
| WCN  | 2006 | 162 | 20 | 13 | 34.269 | P | 0.200 | 0.293  |
| N08A | 2006 | 162 | 20 | 13 | 34.777 | P | 0.200 | 0.354  |
| R05C | 2006 | 162 | 20 | 13 | 34.907 | P | 0.200 | 0.047  |
| CMB  | 2006 | 162 | 20 | 13 | 35.520 | P | 0.200 | -0.123 |
| SAO  | 2006 | 162 | 20 | 13 | 35.783 | P | 0.200 | -0.270 |
| SN84 | 2006 | 162 | 20 | 13 | 35.923 | P | 0.200 | -0.387 |
| PACP | 2006 | 162 | 20 | 13 | 35.969 | P | 0.200 | 0.056  |
| SN71 | 2006 | 162 | 20 | 13 | 36.225 | P | 0.200 | -0.586 |
| P07A | 2006 | 162 | 20 | 13 | 36.332 | P | 0.200 | 0.294  |
| SN85 | 2006 | 162 | 20 | 13 | 36.498 | P | 0.200 | -0.085 |
| O08A | 2006 | 162 | 20 | 13 | 36.517 | P | 0.200 | 0.634  |
| HAST | 2006 | 162 | 20 | 13 | 36.580 | P | 0.200 | -0.330 |
| SN73 | 2006 | 162 | 20 | 13 | 36.866 | P | 0.200 | -0.446 |
| S05C | 2006 | 162 | 20 | 13 | 37.429 | P | 0.200 | -0.525 |
| R06C | 2006 | 162 | 20 | 13 | 37.676 | P | 0.200 | 0.258  |
| S06C | 2006 | 162 | 20 | 13 | 37.736 | P | 0.200 | -0.325 |
| SN76 | 2006 | 162 | 20 | 13 | 37.975 | P | 0.200 | 0.187  |
| Q07A | 2006 | 162 | 20 | 13 | 38.224 | P | 0.200 | 0.277  |
| P08A | 2006 | 162 | 20 | 13 | 38.682 | P | 0.200 | 0.702  |
| SN64 | 2006 | 162 | 20 | 13 | 38.787 | P | 0.200 | -0.191 |
| BMN  | 2006 | 162 | 20 | 13 | 38.799 | P | 0.200 | 0.447  |
| SN51 | 2006 | 162 | 20 | 13 | 39.048 | P | 0.200 | -0.003 |
| SN52 | 2006 | 162 | 20 | 13 | 39.110 | P | 0.200 | -0.535 |
| SN66 | 2006 | 162 | 20 | 13 | 39.142 | P | 0.200 | 0.140  |
| V03C | 2006 | 162 | 20 | 13 | 39.199 | P | 0.200 | 0.277  |
| SN67 | 2006 | 162 | 20 | 13 | 39.439 | P | 0.200 | 0.314  |
| SN54 | 2006 | 162 | 20 | 13 | 39.569 | P | 0.200 | -0.192 |
| U04C | 2006 | 162 | 20 | 13 | 39.757 | P | 0.200 | 0.246  |
| SN55 | 2006 | 162 | 20 | 13 | 39.851 | P | 0.200 | -0.029 |
| O09A | 2006 | 162 | 20 | 13 | 39.926 | P | 0.200 | 0.796  |
| R07C | 2006 | 162 | 20 | 13 | 40.363 | P | 0.200 | 0.178  |
| SN57 | 2006 | 162 | 20 | 13 | 40.549 | P | 0.200 | 0.507  |
| T06C | 2006 | 162 | 20 | 13 | 40.585 | P | 0.200 | -0.464 |
| SN44 | 2006 | 162 | 20 | 13 | 41.045 | P | 0.200 | -0.067 |
| Q08A | 2006 | 162 | 20 | 13 | 41.165 | P | 0.200 | -0.012 |
| PKD  | 2006 | 162 | 20 | 13 | 41.422 | P | 0.200 | -0.174 |
| SN21 | 2006 | 162 | 20 | 13 | 41.489 | P | 0.200 | -0.775 |
| V04C | 2006 | 162 | 20 | 13 | 41.581 | P | 0.200 | 0.267  |
| SN47 | 2006 | 162 | 20 | 13 | 41.659 | P | 0.200 | 0.128  |
| SN48 | 2006 | 162 | 20 | 13 | 41.710 | P | 0.200 | 0.290  |
| P09A | 2006 | 162 | 20 | 13 | 41.737 | P | 0.200 | 0.318  |
| SN22 | 2006 | 162 | 20 | 13 | 41.745 | P | 0.200 | -0.558 |

|      |      |     |    |    |        |   |       |        |
|------|------|-----|----|----|--------|---|-------|--------|
| SN46 | 2006 | 162 | 20 | 13 | 41.822 | P | 0.200 | 0.198  |
| MNV  | 2006 | 162 | 20 | 13 | 41.962 | P | 0.200 | 0.203  |
| U05C | 2006 | 162 | 20 | 13 | 42.008 | P | 0.200 | 0.421  |
| SN23 | 2006 | 162 | 20 | 13 | 42.116 | P | 0.200 | -0.470 |
| SN11 | 2006 | 162 | 20 | 13 | 42.357 | P | 0.200 | -0.769 |
| R08A | 2006 | 162 | 20 | 13 | 42.420 | P | 0.200 | 0.390  |
| SN38 | 2006 | 162 | 20 | 13 | 42.624 | P | 0.200 | 0.282  |
| SN36 | 2006 | 162 | 20 | 13 | 42.740 | P | 0.200 | 0.192  |
| PHL  | 2006 | 162 | 20 | 13 | 43.092 | P | 0.200 | 0.034  |
| SN25 | 2006 | 162 | 20 | 13 | 43.460 | P | 0.200 | -0.039 |
| SN26 | 2006 | 162 | 20 | 13 | 43.639 | P | 0.200 | 0.371  |
| Q09A | 2006 | 162 | 20 | 13 | 43.668 | P | 0.200 | 0.241  |
| SN28 | 2006 | 162 | 20 | 13 | 43.720 | P | 0.200 | 0.397  |
| RCT  | 2006 | 162 | 20 | 13 | 43.883 | P | 0.200 | -0.627 |
| SN15 | 2006 | 162 | 20 | 13 | 44.094 | P | 0.200 | 0.051  |
| V05C | 2006 | 162 | 20 | 13 | 44.096 | P | 0.200 | 0.359  |
| SN16 | 2006 | 162 | 20 | 13 | 45.056 | P | 0.200 | 0.179  |
| S08C | 2006 | 162 | 20 | 13 | 45.109 | P | 0.200 | 0.327  |
| SMM  | 2006 | 162 | 20 | 13 | 45.423 | P | 0.200 | 0.119  |
| VES  | 2006 | 162 | 20 | 13 | 45.512 | P | 0.200 | -1.077 |
| SDP  | 2006 | 162 | 20 | 13 | 45.632 | P | 0.200 | -0.376 |
| TIN  | 2006 | 162 | 20 | 13 | 45.900 | P | 0.200 | 0.066  |
| S09A | 2006 | 162 | 20 | 13 | 47.006 | P | 0.200 | 0.134  |
| MPP  | 2006 | 162 | 20 | 13 | 47.455 | P | 0.200 | 0.162  |
| CWC  | 2006 | 162 | 20 | 13 | 47.914 | P | 0.200 | -0.301 |
| ISA  | 2006 | 162 | 20 | 13 | 48.202 | P | 0.200 | -0.856 |
| Q11A | 2006 | 162 | 20 | 13 | 48.363 | P | 0.200 | 0.164  |
| GRA  | 2006 | 162 | 20 | 13 | 48.778 | P | 0.200 | 0.341  |
| SBC  | 2006 | 162 | 20 | 13 | 48.778 | P | 0.200 | -0.056 |
| ARV  | 2006 | 162 | 20 | 13 | 49.001 | P | 0.200 | -0.498 |
| SCZ2 | 2006 | 162 | 20 | 13 | 49.929 | P | 0.200 | -0.398 |
| MPM  | 2006 | 162 | 20 | 13 | 51.139 | P | 0.200 | -0.110 |
| LGU  | 2006 | 162 | 20 | 13 | 51.229 | P | 0.200 | -0.773 |
| OSI  | 2006 | 162 | 20 | 13 | 51.446 | P | 0.200 | -0.139 |
| FUR  | 2006 | 162 | 20 | 13 | 51.819 | P | 0.200 | 0.334  |
| LRL  | 2006 | 162 | 20 | 13 | 52.059 | P | 0.200 | -0.211 |
| TPNV | 2006 | 162 | 20 | 13 | 52.306 | P | 0.200 | 0.025  |
| SNCC | 2006 | 162 | 20 | 13 | 52.682 | P | 0.200 | -0.453 |
| EDW2 | 2006 | 162 | 20 | 13 | 53.053 | P | 0.200 | 0.118  |
| DJJ  | 2006 | 162 | 20 | 13 | 53.239 | P | 0.200 | -0.574 |
| DEC  | 2006 | 162 | 20 | 13 | 53.329 | P | 0.200 | -0.536 |
| PAS  | 2006 | 162 | 20 | 13 | 54.112 | P | 0.200 | -0.581 |
| MWC  | 2006 | 162 | 20 | 13 | 54.542 | P | 0.200 | -0.496 |
| FMP  | 2006 | 162 | 20 | 13 | 55.135 | P | 0.200 | -0.279 |
| SHO  | 2006 | 162 | 20 | 13 | 55.169 | P | 0.200 | -0.082 |
| GSC  | 2006 | 162 | 20 | 13 | 55.375 | P | 0.200 | -0.106 |
| CIA  | 2006 | 162 | 20 | 13 | 55.536 | P | 0.200 | -0.642 |
| BFS  | 2006 | 162 | 20 | 13 | 55.702 | P | 0.200 | -0.406 |
| RRX  | 2006 | 162 | 20 | 13 | 56.134 | P | 0.200 | 0.068  |
| TUQ  | 2006 | 162 | 20 | 13 | 57.854 | P | 0.200 | 0.088  |
| BBR  | 2006 | 162 | 20 | 13 | 58.017 | P | 0.200 | -0.575 |
| HEC  | 2006 | 162 | 20 | 13 | 58.348 | P | 0.200 | -0.045 |

|      |      |     |    |        |          |            |         |       |        |
|------|------|-----|----|--------|----------|------------|---------|-------|--------|
| 2006 | 189  | 20  | 40 | 0.7552 | 51.21400 | -179.31200 | 22.0000 | 147   | -0.008 |
| DBO  | 2006 | 189 | 20 | 47     | 18.837   | P          | 0.200   | 0.950 |        |
| J03A | 2006 | 189 | 20 | 47     | 19.149   | P          | 0.200   | 1.059 |        |
| HUMO | 2006 | 189 | 20 | 47     | 22.356   | P          | 0.200   | 0.790 |        |
| YBH  | 2006 | 189 | 20 | 47     | 28.078   | P          | 0.200   | 1.105 |        |
| K04A | 2006 | 189 | 20 | 47     | 28.508   | P          | 0.200   | 0.509 |        |
| N02C | 2006 | 189 | 20 | 47     | 28.785   | P          | 0.200   | 0.703 |        |
| M02C | 2006 | 189 | 20 | 47     | 28.829   | P          | 0.200   | 1.048 |        |
| L04A | 2006 | 189 | 20 | 47     | 29.698   | P          | 0.200   | 0.513 |        |
| M04C | 2006 | 189 | 20 | 47     | 31.735   | P          | 0.200   | 0.416 |        |

|      |      |     |    |    |        |   |       |        |
|------|------|-----|----|----|--------|---|-------|--------|
| M03C | 2006 | 189 | 20 | 47 | 32.513 | P | 0.200 | 0.324  |
| WDC  | 2006 | 189 | 20 | 47 | 33.647 | P | 0.200 | 0.491  |
| P01C | 2006 | 189 | 20 | 47 | 34.755 | P | 0.200 | 0.357  |
| O02C | 2006 | 189 | 20 | 47 | 34.757 | P | 0.200 | 0.807  |
| L05A | 2006 | 189 | 20 | 47 | 36.112 | P | 0.200 | 0.821  |
| M05C | 2006 | 189 | 20 | 47 | 37.125 | P | 0.200 | 0.279  |
| GASB | 2006 | 189 | 20 | 47 | 37.759 | P | 0.200 | 0.816  |
| HATC | 2006 | 189 | 20 | 47 | 38.075 | P | 0.200 | 0.316  |
| HOPS | 2006 | 189 | 20 | 47 | 38.310 | P | 0.200 | 0.112  |
| O03C | 2006 | 189 | 20 | 47 | 38.570 | P | 0.200 | -0.064 |
| M06C | 2006 | 189 | 20 | 47 | 41.515 | P | 0.200 | 0.449  |
| O04C | 2006 | 189 | 20 | 47 | 42.412 | P | 0.200 | 0.272  |
| MNRC | 2006 | 189 | 20 | 47 | 42.717 | P | 0.200 | 0.645  |
| MCCM | 2006 | 189 | 20 | 47 | 42.912 | P | 0.200 | -0.350 |
| ELFS | 2006 | 189 | 20 | 47 | 42.965 | P | 0.200 | 0.480  |
| SUTB | 2006 | 189 | 20 | 47 | 43.014 | P | 0.200 | -0.599 |
| ORV  | 2006 | 189 | 20 | 47 | 43.039 | P | 0.200 | -0.482 |
| L07A | 2006 | 189 | 20 | 47 | 43.584 | P | 0.200 | 0.454  |
| CVS  | 2006 | 189 | 20 | 47 | 44.278 | P | 0.200 | -0.249 |
| FARB | 2006 | 189 | 20 | 47 | 44.533 | P | 0.200 | -0.324 |
| O05C | 2006 | 189 | 20 | 47 | 44.793 | P | 0.200 | 0.203  |
| Q03C | 2006 | 189 | 20 | 47 | 46.325 | P | 0.200 | 0.966  |
| Q04C | 2006 | 189 | 20 | 47 | 47.469 | P | 0.200 | -0.096 |
| BRK  | 2006 | 189 | 20 | 47 | 47.593 | P | 0.200 | -0.294 |
| BEK  | 2006 | 189 | 20 | 47 | 47.797 | P | 0.200 | -0.290 |
| BKS  | 2006 | 189 | 20 | 47 | 47.860 | P | 0.200 | -0.107 |
| BRIB | 2006 | 189 | 20 | 47 | 48.125 | P | 0.200 | -0.028 |
| O06A | 2006 | 189 | 20 | 47 | 49.306 | P | 0.200 | 0.045  |
| P05C | 2006 | 189 | 20 | 47 | 49.366 | P | 0.200 | -0.155 |
| BDM  | 2006 | 189 | 20 | 47 | 49.712 | P | 0.200 | 0.224  |
| JRSC | 2006 | 189 | 20 | 47 | 49.868 | P | 0.200 | -0.500 |
| LAVA | 2006 | 189 | 20 | 47 | 51.226 | P | 0.200 | -0.161 |
| P06A | 2006 | 189 | 20 | 47 | 51.290 | P | 0.200 | 0.105  |
| BNLO | 2006 | 189 | 20 | 47 | 51.580 | P | 0.200 | -0.527 |
| WENL | 2006 | 189 | 20 | 47 | 51.776 | P | 0.200 | 0.035  |
| R04C | 2006 | 189 | 20 | 47 | 52.385 | P | 0.200 | -0.297 |
| MHC  | 2006 | 189 | 20 | 47 | 53.718 | P | 0.200 | -0.152 |
| WCN  | 2006 | 189 | 20 | 47 | 53.985 | P | 0.200 | 0.106  |
| O07A | 2006 | 189 | 20 | 47 | 54.269 | P | 0.200 | 0.181  |
| S04C | 2006 | 189 | 20 | 47 | 54.497 | P | 0.200 | -0.033 |
| N08A | 2006 | 189 | 20 | 47 | 54.950 | P | 0.200 | 0.041  |
| R05C | 2006 | 189 | 20 | 47 | 55.299 | P | 0.200 | 0.056  |
| CMB  | 2006 | 189 | 20 | 47 | 56.875 | P | 0.200 | 0.189  |
| P07A | 2006 | 189 | 20 | 47 | 57.099 | P | 0.200 | 0.047  |
| PACP | 2006 | 189 | 20 | 47 | 57.255 | P | 0.200 | -0.045 |
| SN84 | 2006 | 189 | 20 | 47 | 57.285 | P | 0.200 | -0.242 |
| O08A | 2006 | 189 | 20 | 47 | 57.377 | P | 0.200 | 0.209  |
| SAO  | 2006 | 189 | 20 | 47 | 57.378 | P | 0.200 | -0.255 |
| SN85 | 2006 | 189 | 20 | 47 | 57.823 | P | 0.200 | -0.099 |
| SN71 | 2006 | 189 | 20 | 47 | 58.241 | P | 0.200 | -0.249 |
| HAST | 2006 | 189 | 20 | 47 | 58.857 | P | 0.200 | -0.182 |
| SN73 | 2006 | 189 | 20 | 47 | 59.063 | P | 0.200 | -0.181 |
| R06C | 2006 | 189 | 20 | 47 | 59.485 | P | 0.200 | 0.239  |
| S05C | 2006 | 189 | 20 | 47 | 59.896 | P | 0.200 | -0.470 |
| SN76 | 2006 | 189 | 20 | 48 | 0.060  | P | 0.200 | 0.288  |
| S06C | 2006 | 189 | 20 | 48 | 0.248  | P | 0.200 | -0.057 |
| Q07A | 2006 | 189 | 20 | 48 | 0.380  | P | 0.200 | 0.106  |
| P08A | 2006 | 189 | 20 | 48 | 0.708  | P | 0.200 | 0.403  |
| T05C | 2006 | 189 | 20 | 48 | 1.326  | P | 0.200 | 0.450  |
| SN64 | 2006 | 189 | 20 | 48 | 1.596  | P | 0.200 | 0.001  |
| SN66 | 2006 | 189 | 20 | 48 | 1.774  | P | 0.200 | 0.158  |
| SN51 | 2006 | 189 | 20 | 48 | 2.230  | P | 0.200 | 0.045  |
| SN67 | 2006 | 189 | 20 | 48 | 2.238  | P | 0.200 | 0.266  |

|      |      |     |    |    |        |   |       |        |
|------|------|-----|----|----|--------|---|-------|--------|
| V03C | 2006 | 189 | 20 | 48 | 2.628  | P | 0.200 | 0.207  |
| SN52 | 2006 | 189 | 20 | 48 | 2.706  | P | 0.200 | -0.325 |
| O09A | 2006 | 189 | 20 | 48 | 2.915  | P | 0.200 | 0.436  |
| SN54 | 2006 | 189 | 20 | 48 | 2.964  | P | 0.200 | 0.095  |
| SN55 | 2006 | 189 | 20 | 48 | 3.204  | P | 0.200 | 0.106  |
| U04C | 2006 | 189 | 20 | 48 | 3.372  | P | 0.200 | 0.277  |
| R07C | 2006 | 189 | 20 | 48 | 3.650  | P | 0.200 | 0.209  |
| SN56 | 2006 | 189 | 20 | 48 | 3.706  | P | 0.200 | 0.178  |
| SN57 | 2006 | 189 | 20 | 48 | 3.834  | P | 0.200 | 0.353  |
| SN43 | 2006 | 189 | 20 | 48 | 4.613  | P | 0.200 | -0.033 |
| Q08A | 2006 | 189 | 20 | 48 | 4.990  | P | 0.200 | -0.177 |
| T06C | 2006 | 189 | 20 | 48 | 5.019  | P | 0.200 | -0.174 |
| SN44 | 2006 | 189 | 20 | 48 | 5.357  | P | 0.200 | 0.230  |
| SN48 | 2006 | 189 | 20 | 48 | 5.599  | P | 0.200 | 0.135  |
| SN47 | 2006 | 189 | 20 | 48 | 5.879  | P | 0.200 | 0.313  |
| P09A | 2006 | 189 | 20 | 48 | 5.930  | P | 0.200 | 0.143  |
| PKD  | 2006 | 189 | 20 | 48 | 6.211  | P | 0.200 | -0.196 |
| V04C | 2006 | 189 | 20 | 48 | 6.593  | P | 0.200 | 0.362  |
| SN21 | 2006 | 189 | 20 | 48 | 6.638  | P | 0.200 | -0.513 |
| R08A | 2006 | 189 | 20 | 48 | 6.721  | P | 0.200 | 0.019  |
| SN22 | 2006 | 189 | 20 | 48 | 6.798  | P | 0.200 | -0.296 |
| SN34 | 2006 | 189 | 20 | 48 | 6.985  | P | 0.200 | 0.149  |
| U05C | 2006 | 189 | 20 | 48 | 6.990  | P | 0.200 | 0.580  |
| SN38 | 2006 | 189 | 20 | 48 | 7.257  | P | 0.200 | 0.180  |
| SN23 | 2006 | 189 | 20 | 48 | 7.364  | P | 0.200 | -0.015 |
| SN37 | 2006 | 189 | 20 | 48 | 7.554  | P | 0.200 | 0.272  |
| SN36 | 2006 | 189 | 20 | 48 | 7.760  | P | 0.200 | 0.353  |
| SN24 | 2006 | 189 | 20 | 48 | 7.989  | P | 0.200 | 0.179  |
| SN11 | 2006 | 189 | 20 | 48 | 8.103  | P | 0.200 | -0.579 |
| SN25 | 2006 | 189 | 20 | 48 | 8.882  | P | 0.200 | 0.059  |
| P10A | 2006 | 189 | 20 | 48 | 8.894  | P | 0.200 | 0.073  |
| Q09A | 2006 | 189 | 20 | 48 | 9.047  | P | 0.200 | 0.068  |
| SN26 | 2006 | 189 | 20 | 48 | 9.158  | P | 0.200 | 0.522  |
| PHL  | 2006 | 189 | 20 | 48 | 9.191  | P | 0.200 | 0.179  |
| HELL | 2006 | 189 | 20 | 48 | 9.893  | P | 0.200 | -0.521 |
| SN15 | 2006 | 189 | 20 | 48 | 9.911  | P | 0.200 | 0.209  |
| V05C | 2006 | 189 | 20 | 48 | 10.412 | P | 0.200 | 0.537  |
| RCT  | 2006 | 189 | 20 | 48 | 10.530 | P | 0.200 | -0.400 |
| S08C | 2006 | 189 | 20 | 48 | 11.143 | P | 0.200 | 0.300  |
| SN16 | 2006 | 189 | 20 | 48 | 11.265 | P | 0.200 | 0.270  |
| SMM  | 2006 | 189 | 20 | 48 | 12.620 | P | 0.200 | 0.246  |
| TIN  | 2006 | 189 | 20 | 48 | 12.716 | P | 0.200 | 0.171  |
| VES  | 2006 | 189 | 20 | 48 | 13.424 | P | 0.200 | -0.734 |
| SDP  | 2006 | 189 | 20 | 48 | 13.602 | P | 0.200 | -0.125 |
| S09A | 2006 | 189 | 20 | 48 | 13.973 | P | 0.200 | -0.310 |
| R10A | 2006 | 189 | 20 | 48 | 15.650 | P | 0.200 | -0.403 |
| MPP  | 2006 | 189 | 20 | 48 | 15.713 | P | 0.200 | 0.115  |
| Q11A | 2006 | 189 | 20 | 48 | 16.269 | P | 0.200 | -0.256 |
| CWC  | 2006 | 189 | 20 | 48 | 16.285 | P | 0.200 | -0.099 |
| GRA  | 2006 | 189 | 20 | 48 | 17.134 | P | 0.200 | 0.182  |
| ISA  | 2006 | 189 | 20 | 48 | 17.308 | P | 0.200 | -0.823 |
| SBC  | 2006 | 189 | 20 | 48 | 18.210 | P | 0.200 | 0.031  |
| ARV  | 2006 | 189 | 20 | 48 | 18.372 | P | 0.200 | -0.685 |
| SCZ2 | 2006 | 189 | 20 | 48 | 20.358 | P | 0.200 | -0.509 |
| MPM  | 2006 | 189 | 20 | 48 | 20.975 | P | 0.200 | -0.255 |
| FUR  | 2006 | 189 | 20 | 48 | 21.902 | P | 0.200 | -0.042 |
| OSI  | 2006 | 189 | 20 | 48 | 21.972 | P | 0.200 | -0.329 |
| LGU  | 2006 | 189 | 20 | 48 | 22.437 | P | 0.200 | -0.733 |
| LRL  | 2006 | 189 | 20 | 48 | 22.495 | P | 0.200 | -0.636 |
| TPNV | 2006 | 189 | 20 | 48 | 22.511 | P | 0.200 | -0.407 |
| EDW2 | 2006 | 189 | 20 | 48 | 24.002 | P | 0.200 | -0.463 |
| U10A | 2006 | 189 | 20 | 48 | 24.905 | P | 0.200 | 0.002  |
| SNCC | 2006 | 189 | 20 | 48 | 24.990 | P | 0.200 | -0.391 |

|      |      |     |    |    |        |   |       |        |
|------|------|-----|----|----|--------|---|-------|--------|
| DJJ  | 2006 | 189 | 20 | 48 | 25.405 | P | 0.200 | -0.721 |
| DEC  | 2006 | 189 | 20 | 48 | 25.444 | P | 0.200 | -0.618 |
| PAS  | 2006 | 189 | 20 | 48 | 26.632 | P | 0.200 | -0.736 |
| CHF  | 2006 | 189 | 20 | 48 | 26.996 | P | 0.200 | -0.273 |
| MWC  | 2006 | 189 | 20 | 48 | 27.250 | P | 0.200 | -0.512 |
| SHO  | 2006 | 189 | 20 | 48 | 27.372 | P | 0.200 | -0.476 |
| RPV  | 2006 | 189 | 20 | 48 | 27.524 | P | 0.200 | -0.771 |
| GSC  | 2006 | 189 | 20 | 48 | 27.842 | P | 0.200 | -0.409 |
| FMP  | 2006 | 189 | 20 | 48 | 28.224 | P | 0.200 | -0.643 |
| ADO  | 2006 | 189 | 20 | 48 | 28.936 | P | 0.200 | -0.115 |
| BFS  | 2006 | 189 | 20 | 48 | 29.080 | P | 0.200 | -0.440 |
| RRX  | 2006 | 189 | 20 | 48 | 29.119 | P | 0.200 | -0.266 |
| CIA  | 2006 | 189 | 20 | 48 | 29.242 | P | 0.200 | -0.774 |
| U11A | 2006 | 189 | 20 | 48 | 29.300 | P | 0.200 | -0.258 |
| TUQ  | 2006 | 189 | 20 | 48 | 31.414 | P | 0.200 | -0.535 |
| V11A | 2006 | 189 | 20 | 48 | 32.040 | P | 0.200 | -0.329 |
| HEC  | 2006 | 189 | 20 | 48 | 32.427 | P | 0.200 | -0.534 |
| BBR  | 2006 | 189 | 20 | 48 | 32.711 | P | 0.200 | -0.497 |

|      |     |   |    |         |          |            |        |     |       |
|------|-----|---|----|---------|----------|------------|--------|-----|-------|
| 2006 | 261 | 3 | 45 | 57.0724 | 51.51100 | -173.96500 | 5.3000 | 218 | 0.000 |
|------|-----|---|----|---------|----------|------------|--------|-----|-------|

|      |      |     |   |    |        |   |       |        |
|------|------|-----|---|----|--------|---|-------|--------|
| J03A | 2006 | 261 | 3 | 52 | 48.978 | P | 0.200 | 0.707  |
| YBH  | 2006 | 261 | 3 | 52 | 58.225 | P | 0.200 | 0.895  |
| J05A | 2006 | 261 | 3 | 52 | 58.700 | P | 0.200 | 0.702  |
| K04A | 2006 | 261 | 3 | 52 | 58.773 | P | 0.200 | 0.340  |
| N02C | 2006 | 261 | 3 | 52 | 59.000 | P | 0.200 | 0.543  |
| M02C | 2006 | 261 | 3 | 52 | 59.190 | P | 0.200 | 1.030  |
| L04A | 2006 | 261 | 3 | 53 | 0.024  | P | 0.200 | 0.400  |
| M04C | 2006 | 261 | 3 | 53 | 2.204  | P | 0.200 | 0.401  |
| M03C | 2006 | 261 | 3 | 53 | 2.990  | P | 0.200 | 0.315  |
| K05A | 2006 | 261 | 3 | 53 | 3.173  | P | 0.200 | 0.759  |
| WDC  | 2006 | 261 | 3 | 53 | 4.145  | P | 0.200 | 0.478  |
| P01C | 2006 | 261 | 3 | 53 | 5.199  | P | 0.200 | 0.256  |
| O02C | 2006 | 261 | 3 | 53 | 5.223  | P | 0.200 | 0.750  |
| L05A | 2006 | 261 | 3 | 53 | 6.609  | P | 0.200 | 0.709  |
| M05C | 2006 | 261 | 3 | 53 | 7.787  | P | 0.200 | 0.323  |
| GASB | 2006 | 261 | 3 | 53 | 8.356  | P | 0.200 | 0.811  |
| HATC | 2006 | 261 | 3 | 53 | 8.749  | P | 0.200 | 0.359  |
| HOPS | 2006 | 261 | 3 | 53 | 8.860  | P | 0.200 | 0.013  |
| O03C | 2006 | 261 | 3 | 53 | 9.212  | P | 0.200 | -0.070 |
| SNG5 | 2006 | 261 | 3 | 53 | 13.003 | P | 0.200 | -0.352 |
| M06C | 2006 | 261 | 3 | 53 | 12.244 | P | 0.200 | 0.440  |
| O04C | 2006 | 261 | 3 | 53 | 13.148 | P | 0.200 | 0.265  |
| MNRC | 2006 | 261 | 3 | 53 | 13.464 | P | 0.200 | 0.647  |
| SUTB | 2006 | 261 | 3 | 53 | 13.746 | P | 0.200 | -0.653 |
| ORV  | 2006 | 261 | 3 | 53 | 13.764 | P | 0.200 | -0.535 |
| ELFS | 2006 | 261 | 3 | 53 | 13.818 | P | 0.200 | 0.573  |
| L07A | 2006 | 261 | 3 | 53 | 14.372 | P | 0.200 | 0.396  |
| SNF6 | 2006 | 261 | 3 | 53 | 15.726 | P | 0.200 | -0.236 |
| CVS  | 2006 | 261 | 3 | 53 | 15.009 | P | 0.200 | -0.347 |
| SNE4 | 2006 | 261 | 3 | 53 | 16.415 | P | 0.200 | -0.179 |
| SNF9 | 2006 | 261 | 3 | 53 | 16.543 | P | 0.200 | -0.561 |
| O05C | 2006 | 261 | 3 | 53 | 15.697 | P | 0.200 | 0.299  |
| SNE5 | 2006 | 261 | 3 | 53 | 16.841 | P | 0.200 | -0.182 |
| SNE7 | 2006 | 261 | 3 | 53 | 17.247 | P | 0.200 | -0.093 |
| SNE6 | 2006 | 261 | 3 | 53 | 17.827 | P | 0.200 | -0.445 |
| Q03C | 2006 | 261 | 3 | 53 | 17.266 | P | 0.200 | 1.069  |
| N06A | 2006 | 261 | 3 | 53 | 17.562 | P | 0.200 | 0.199  |
| SNE9 | 2006 | 261 | 3 | 53 | 18.607 | P | 0.200 | -0.465 |
| SND7 | 2006 | 261 | 3 | 53 | 18.810 | P | 0.200 | -0.151 |
| SND5 | 2006 | 261 | 3 | 53 | 19.003 | P | 0.200 | -0.176 |
| M07A | 2006 | 261 | 3 | 53 | 18.041 | P | 0.200 | 0.307  |
| Q04C | 2006 | 261 | 3 | 53 | 18.313 | P | 0.200 | -0.151 |
| SND4 | 2006 | 261 | 3 | 53 | 18.394 | P | 0.200 | -0.237 |



|      |      |     |   |    |        |   |       |        |
|------|------|-----|---|----|--------|---|-------|--------|
| BRK  | 2006 | 261 | 3 | 53 | 18.427 | P | 0.200 | -0.397 |
| BKS  | 2006 | 261 | 3 | 53 | 18.696 | P | 0.200 | -0.215 |
| BEK  | 2006 | 261 | 3 | 53 | 18.795 | P | 0.200 | -0.196 |
| BRIB | 2006 | 261 | 3 | 53 | 18.915 | P | 0.200 | -0.187 |
| SND8 | 2006 | 261 | 3 | 53 | 20.518 | P | 0.200 | -0.215 |
| SNC4 | 2006 | 261 | 3 | 53 | 20.548 | P | 0.200 | -0.241 |
| SNC5 | 2006 | 261 | 3 | 53 | 20.720 | P | 0.200 | -0.180 |
| P05C | 2006 | 261 | 3 | 53 | 20.350 | P | 0.200 | -0.115 |
| O06A | 2006 | 261 | 3 | 53 | 20.397 | P | 0.200 | 0.182  |
| SNC7 | 2006 | 261 | 3 | 53 | 21.438 | P | 0.200 | -0.164 |
| BDM  | 2006 | 261 | 3 | 53 | 20.481 | P | 0.200 | 0.017  |
| SNC3 | 2006 | 261 | 3 | 53 | 20.599 | P | 0.200 | 0.484  |
| JRSC | 2006 | 261 | 3 | 53 | 20.836 | P | 0.200 | -0.551 |
| SNB3 | 2006 | 261 | 3 | 53 | 22.187 | P | 0.200 | 0.235  |
| SNC6 | 2006 | 261 | 3 | 53 | 22.365 | P | 0.200 | 0.039  |
| N07B | 2006 | 261 | 3 | 53 | 21.758 | P | 0.200 | 0.055  |
| SNB5 | 2006 | 261 | 3 | 53 | 22.784 | P | 0.200 | -0.275 |
| LAVA | 2006 | 261 | 3 | 53 | 22.219 | P | 0.200 | -0.165 |
| P06A | 2006 | 261 | 3 | 53 | 22.429 | P | 0.200 | 0.248  |
| BNLO | 2006 | 261 | 3 | 53 | 22.505 | P | 0.200 | -0.678 |
| WENL | 2006 | 261 | 3 | 53 | 22.815 | P | 0.200 | 0.036  |
| SNB7 | 2006 | 261 | 3 | 53 | 24.222 | P | 0.200 | 0.053  |
| R04C | 2006 | 261 | 3 | 53 | 23.277 | P | 0.200 | -0.449 |
| SNA3 | 2006 | 261 | 3 | 53 | 24.572 | P | 0.200 | 0.205  |
| SNA4 | 2006 | 261 | 3 | 53 | 24.620 | P | 0.200 | -0.137 |
| MHC  | 2006 | 261 | 3 | 53 | 24.770 | P | 0.200 | -0.197 |
| SNA7 | 2006 | 261 | 3 | 53 | 25.993 | P | 0.200 | 0.300  |
| WCN  | 2006 | 261 | 3 | 53 | 25.093 | P | 0.200 | 0.156  |
| O07A | 2006 | 261 | 3 | 53 | 25.406 | P | 0.200 | 0.230  |
| S04C | 2006 | 261 | 3 | 53 | 25.560 | P | 0.200 | -0.075 |
| SNA8 | 2006 | 261 | 3 | 53 | 27.021 | P | 0.200 | 0.214  |
| N08A | 2006 | 261 | 3 | 53 | 26.141 | P | 0.200 | 0.095  |
| SN97 | 2006 | 261 | 3 | 53 | 27.307 | P | 0.200 | 0.159  |
| R05C | 2006 | 261 | 3 | 53 | 26.392 | P | 0.200 | 0.057  |
| SN93 | 2006 | 261 | 3 | 53 | 26.488 | P | 0.200 | 0.457  |
| SN96 | 2006 | 261 | 3 | 53 | 27.868 | P | 0.200 | 0.233  |
| CMB  | 2006 | 261 | 3 | 53 | 28.076 | P | 0.200 | 0.243  |
| PACP | 2006 | 261 | 3 | 53 | 28.410 | P | 0.200 | -0.090 |
| P07A | 2006 | 261 | 3 | 53 | 28.506 | P | 0.200 | 0.305  |
| O08A | 2006 | 261 | 3 | 53 | 28.514 | P | 0.200 | 0.154  |
| SAO  | 2006 | 261 | 3 | 53 | 28.606 | P | 0.200 | -0.250 |
| HAST | 2006 | 261 | 3 | 53 | 30.093 | P | 0.200 | -0.218 |
| R06C | 2006 | 261 | 3 | 53 | 30.743 | P | 0.200 | 0.295  |
| S05C | 2006 | 261 | 3 | 53 | 31.114 | P | 0.200 | -0.510 |
| S06C | 2006 | 261 | 3 | 53 | 31.445 | P | 0.200 | -0.098 |
| Q07A | 2006 | 261 | 3 | 53 | 31.726 | P | 0.200 | 0.212  |
| P08A | 2006 | 261 | 3 | 53 | 32.122 | P | 0.200 | 0.564  |
| BMN  | 2006 | 261 | 3 | 53 | 32.387 | P | 0.200 | -0.121 |
| T05C | 2006 | 261 | 3 | 53 | 32.676 | P | 0.200 | 0.513  |
| SN55 | 2006 | 261 | 3 | 53 | 34.523 | P | 0.200 | 0.111  |
| V03C | 2006 | 261 | 3 | 53 | 33.970 | P | 0.200 | 0.164  |
| O09A | 2006 | 261 | 3 | 53 | 34.120 | P | 0.200 | 0.283  |
| U04C | 2006 | 261 | 3 | 53 | 34.804 | P | 0.200 | 0.328  |
| SN43 | 2006 | 261 | 3 | 53 | 36.033 | P | 0.200 | 0.023  |
| R07C | 2006 | 261 | 3 | 53 | 35.129 | P | 0.200 | 0.372  |
| T06C | 2006 | 261 | 3 | 53 | 36.475 | P | 0.200 | -0.121 |
| Q08A | 2006 | 261 | 3 | 53 | 36.478 | P | 0.200 | -0.074 |
| P09A | 2006 | 261 | 3 | 53 | 37.309 | P | 0.200 | 0.090  |
| PKD  | 2006 | 261 | 3 | 53 | 37.699 | P | 0.200 | -0.191 |
| RAMR | 2006 | 261 | 3 | 53 | 38.101 | P | 0.200 | 0.362  |
| R08A | 2006 | 261 | 3 | 53 | 38.251 | P | 0.200 | 0.111  |
| U05C | 2006 | 261 | 3 | 53 | 38.509 | P | 0.200 | 0.629  |
| MLAC | 2006 | 261 | 3 | 53 | 39.255 | P | 0.200 | 1.046  |

|      |      |     |   |    |        |   |       |        |
|------|------|-----|---|----|--------|---|-------|--------|
| P10A | 2006 | 261 | 3 | 53 | 40.525 | P | 0.200 | 0.171  |
| Q09A | 2006 | 261 | 3 | 53 | 40.754 | P | 0.200 | 0.263  |
| PHL  | 2006 | 261 | 3 | 53 | 40.831 | P | 0.200 | 0.224  |
| HELL | 2006 | 261 | 3 | 53 | 41.495 | P | 0.200 | -0.480 |
| V05C | 2006 | 261 | 3 | 53 | 42.043 | P | 0.200 | 0.575  |
| RCT  | 2006 | 261 | 3 | 53 | 42.167 | P | 0.200 | -0.369 |
| S08C | 2006 | 261 | 3 | 53 | 42.835 | P | 0.200 | 0.439  |
| R09A | 2006 | 261 | 3 | 53 | 43.844 | P | 0.200 | -0.266 |
| TPH  | 2006 | 261 | 3 | 53 | 43.956 | P | 0.200 | -0.258 |
| SMM  | 2006 | 261 | 3 | 53 | 44.343 | P | 0.200 | 0.283  |
| VES  | 2006 | 261 | 3 | 53 | 45.213 | P | 0.200 | -0.645 |
| S09A | 2006 | 261 | 3 | 53 | 45.672 | P | 0.200 | -0.274 |
| R10A | 2006 | 261 | 3 | 53 | 47.415 | P | 0.200 | -0.355 |
| MPP  | 2006 | 261 | 3 | 53 | 47.590 | P | 0.200 | 0.205  |
| Q11A | 2006 | 261 | 3 | 53 | 48.020 | P | 0.200 | -0.266 |
| CWC  | 2006 | 261 | 3 | 53 | 48.106 | P | 0.200 | -0.004 |
| GRA  | 2006 | 261 | 3 | 53 | 49.119 | P | 0.200 | 0.420  |
| ISA  | 2006 | 261 | 3 | 53 | 49.209 | P | 0.200 | -0.734 |
| SBC  | 2006 | 261 | 3 | 53 | 49.987 | P | 0.200 | -0.072 |
| ARV  | 2006 | 261 | 3 | 53 | 50.125 | P | 0.200 | -0.796 |
| MPM  | 2006 | 261 | 3 | 53 | 52.892 | P | 0.200 | -0.207 |
| FUR  | 2006 | 261 | 3 | 53 | 53.842 | P | 0.200 | -0.007 |
| OSI  | 2006 | 261 | 3 | 53 | 54.035 | P | 0.200 | -0.235 |
| LRL  | 2006 | 261 | 3 | 53 | 54.434 | P | 0.200 | -0.645 |
| SLA  | 2006 | 261 | 3 | 53 | 54.702 | P | 0.200 | -0.240 |
| TOV  | 2006 | 261 | 3 | 53 | 55.591 | P | 0.200 | -0.550 |
| EDW2 | 2006 | 261 | 3 | 53 | 56.058 | P | 0.200 | -0.419 |
| U10A | 2006 | 261 | 3 | 53 | 56.931 | P | 0.200 | 0.038  |
| DJJ  | 2006 | 261 | 3 | 53 | 57.500 | P | 0.200 | -0.723 |
| DEC  | 2006 | 261 | 3 | 53 | 57.574 | P | 0.200 | -0.568 |
| VCS  | 2006 | 261 | 3 | 53 | 57.989 | P | 0.200 | -0.074 |
| PAS  | 2006 | 261 | 3 | 53 | 58.803 | P | 0.200 | -0.683 |
| CHF  | 2006 | 261 | 3 | 53 | 59.100 | P | 0.200 | -0.276 |
| MWC  | 2006 | 261 | 3 | 53 | 59.371 | P | 0.200 | -0.510 |
| SHO  | 2006 | 261 | 3 | 53 | 59.488 | P | 0.200 | -0.430 |
| GSC  | 2006 | 261 | 3 | 53 | 59.983 | P | 0.200 | -0.366 |
| FMP  | 2006 | 261 | 3 | 54 | 0.516  | P | 0.200 | -0.554 |
| ADO  | 2006 | 261 | 3 | 54 | 1.075  | P | 0.200 | -0.114 |
| BFS  | 2006 | 261 | 3 | 54 | 1.299  | P | 0.200 | -0.395 |
| VTV  | 2006 | 261 | 3 | 54 | 1.346  | P | 0.200 | -0.218 |
| RRX  | 2006 | 261 | 3 | 54 | 1.358  | P | 0.200 | -0.176 |
| U11A | 2006 | 261 | 3 | 54 | 1.418  | P | 0.200 | -0.272 |
| CIA  | 2006 | 261 | 3 | 54 | 1.533  | P | 0.200 | -0.727 |
| TUQ  | 2006 | 261 | 3 | 54 | 3.757  | P | 0.200 | -0.393 |
| V11A | 2006 | 261 | 3 | 54 | 4.340  | P | 0.200 | -0.233 |
| HEC  | 2006 | 261 | 3 | 54 | 4.765  | P | 0.200 | -0.434 |
| SVD  | 2006 | 261 | 3 | 54 | 4.859  | P | 0.200 | -0.322 |
| SDD  | 2006 | 261 | 3 | 54 | 4.889  | P | 0.200 | -0.244 |
| BBR  | 2006 | 261 | 3 | 54 | 5.071  | P | 0.200 | -0.389 |

|      |      |    |    |         |          |           |         |       |        |
|------|------|----|----|---------|----------|-----------|---------|-------|--------|
| 2007 | 13   | 9  | 18 | 32.3219 | 45.56700 | 153.76500 | 10.0000 | 303   | -0.014 |
| I03A | 2007 | 13 | 9  | 28      | 13.706   | P         | 0.200   | 0.862 |        |
| J02A | 2007 | 13 | 9  | 28      | 14.805   | P         | 0.200   | 0.775 |        |
| DBO  | 2007 | 13 | 9  | 28      | 17.209   | P         | 0.200   | 0.679 |        |
| J03A | 2007 | 13 | 9  | 28      | 17.568   | P         | 0.200   | 0.961 |        |
| I04A | 2007 | 13 | 9  | 28      | 17.676   | P         | 0.200   | 0.270 |        |
| M01C | 2007 | 13 | 9  | 28      | 18.320   | P         | 0.200   | 0.860 |        |
| L02A | 2007 | 13 | 9  | 28      | 19.419   | P         | 0.200   | 0.781 |        |
| HUMO | 2007 | 13 | 9  | 28      | 20.378   | P         | 0.200   | 0.720 |        |
| J04A | 2007 | 13 | 9  | 28      | 21.505   | P         | 0.200   | 0.409 |        |
| JCC  | 2007 | 13 | 9  | 28      | 22.989   | P         | 0.200   | 0.950 |        |
| YBH  | 2007 | 13 | 9  | 28      | 25.131   | P         | 0.200   | 0.879 |        |
| J05A | 2007 | 13 | 9  | 28      | 25.293   | P         | 0.200   | 0.829 |        |

|      |      |    |   |    |        |   |       |        |
|------|------|----|---|----|--------|---|-------|--------|
| K04A | 2007 | 13 | 9 | 28 | 25.466 | P | 0.200 | 0.466  |
| N02C | 2007 | 13 | 9 | 28 | 25.743 | P | 0.200 | 0.496  |
| M02C | 2007 | 13 | 9 | 28 | 25.972 | P | 0.200 | 1.006  |
| L04A | 2007 | 13 | 9 | 28 | 26.533 | P | 0.200 | 0.478  |
| O01C | 2007 | 13 | 9 | 28 | 26.788 | P | 0.200 | 1.123  |
| M04C | 2007 | 13 | 9 | 28 | 28.376 | P | 0.200 | 0.448  |
| M03C | 2007 | 13 | 9 | 28 | 29.005 | P | 0.200 | 0.297  |
| K05A | 2007 | 13 | 9 | 28 | 29.068 | P | 0.200 | 0.881  |
| WDC  | 2007 | 13 | 9 | 28 | 29.793 | P | 0.200 | 0.288  |
| P01C | 2007 | 13 | 9 | 28 | 30.867 | P | 0.200 | 0.334  |
| O02C | 2007 | 13 | 9 | 28 | 30.949 | P | 0.200 | 0.711  |
| L05A | 2007 | 13 | 9 | 28 | 31.893 | P | 0.200 | 0.686  |
| M05C | 2007 | 13 | 9 | 28 | 32.890 | P | 0.200 | 0.289  |
| GASB | 2007 | 13 | 9 | 28 | 33.477 | P | 0.200 | 0.720  |
| HATC | 2007 | 13 | 9 | 28 | 33.687 | P | 0.200 | 0.294  |
| O03C | 2007 | 13 | 9 | 28 | 33.902 | P | 0.200 | -0.240 |
| M06C | 2007 | 13 | 9 | 28 | 36.498 | P | 0.200 | 0.387  |
| SNG5 | 2007 | 13 | 9 | 28 | 36.853 | P | 0.200 | -0.600 |
| O04C | 2007 | 13 | 9 | 28 | 37.399 | P | 0.200 | 0.316  |
| MCCM | 2007 | 13 | 9 | 28 | 37.510 | P | 0.200 | -0.353 |
| MNRC | 2007 | 13 | 9 | 28 | 37.520 | P | 0.200 | 0.486  |
| SNG7 | 2007 | 13 | 9 | 28 | 37.585 | P | 0.200 | -0.029 |
| ORV  | 2007 | 13 | 9 | 28 | 37.587 | P | 0.200 | -0.672 |
| SUTB | 2007 | 13 | 9 | 28 | 37.633 | P | 0.200 | -0.674 |
| ELFS | 2007 | 13 | 9 | 28 | 37.862 | P | 0.200 | 0.532  |
| L07A | 2007 | 13 | 9 | 28 | 38.172 | P | 0.200 | 0.484  |
| CVS  | 2007 | 13 | 9 | 28 | 38.679 | P | 0.200 | -0.342 |
| O05C | 2007 | 13 | 9 | 28 | 39.071 | P | 0.200 | -0.035 |
| SNF6 | 2007 | 13 | 9 | 28 | 39.120 | P | 0.200 | -0.488 |
| SNE4 | 2007 | 13 | 9 | 28 | 39.792 | P | 0.200 | -0.258 |
| SNF8 | 2007 | 13 | 9 | 28 | 40.246 | P | 0.200 | -0.073 |
| SNE5 | 2007 | 13 | 9 | 28 | 40.280 | P | 0.200 | -0.221 |
| SNF9 | 2007 | 13 | 9 | 28 | 40.340 | P | 0.200 | -0.166 |
| Q03C | 2007 | 13 | 9 | 28 | 40.627 | P | 0.200 | 0.889  |
| N06A | 2007 | 13 | 9 | 28 | 40.755 | P | 0.200 | 0.096  |
| M07A | 2007 | 13 | 9 | 28 | 41.178 | P | 0.200 | 0.382  |
| SND4 | 2007 | 13 | 9 | 28 | 41.462 | P | 0.200 | -0.310 |
| BRK  | 2007 | 13 | 9 | 28 | 41.517 | P | 0.200 | -0.281 |
| Q04C | 2007 | 13 | 9 | 28 | 41.584 | P | 0.200 | -0.002 |
| SND7 | 2007 | 13 | 9 | 28 | 41.697 | P | 0.200 | -0.348 |
| BEK  | 2007 | 13 | 9 | 28 | 41.783 | P | 0.200 | -0.327 |
| SND5 | 2007 | 13 | 9 | 28 | 41.791 | P | 0.200 | -0.425 |
| SNE6 | 2007 | 13 | 9 | 28 | 41.947 | P | 0.200 | 0.428  |
| SNE9 | 2007 | 13 | 9 | 28 | 42.012 | P | 0.200 | -0.140 |
| O06A | 2007 | 13 | 9 | 28 | 43.058 | P | 0.200 | 0.053  |
| SNC4 | 2007 | 13 | 9 | 28 | 43.223 | P | 0.200 | -0.297 |
| SNC5 | 2007 | 13 | 9 | 28 | 43.279 | P | 0.200 | -0.319 |
| SND8 | 2007 | 13 | 9 | 28 | 43.283 | P | 0.200 | -0.212 |
| P05C | 2007 | 13 | 9 | 28 | 43.326 | P | 0.200 | 0.033  |
| SNC3 | 2007 | 13 | 9 | 28 | 43.366 | P | 0.200 | 0.458  |
| SND9 | 2007 | 13 | 9 | 28 | 43.825 | P | 0.200 | 0.099  |
| SNC7 | 2007 | 13 | 9 | 28 | 44.060 | P | 0.200 | -0.205 |
| N07B | 2007 | 13 | 9 | 28 | 44.185 | P | 0.200 | 0.056  |
| LAVA | 2007 | 13 | 9 | 28 | 44.453 | P | 0.200 | -0.397 |
| SNB3 | 2007 | 13 | 9 | 28 | 44.570 | P | 0.200 | 0.103  |
| SNC6 | 2007 | 13 | 9 | 28 | 44.753 | P | 0.200 | -0.095 |
| BNLO | 2007 | 13 | 9 | 28 | 44.796 | P | 0.200 | -0.453 |
| P06A | 2007 | 13 | 9 | 28 | 44.845 | P | 0.200 | 0.217  |
| WENL | 2007 | 13 | 9 | 28 | 44.980 | P | 0.200 | -0.050 |
| SNC8 | 2007 | 13 | 9 | 28 | 45.035 | P | 0.200 | -0.090 |
| SNB5 | 2007 | 13 | 9 | 28 | 45.058 | P | 0.200 | -0.337 |
| R04C | 2007 | 13 | 9 | 28 | 45.403 | P | 0.200 | -0.441 |
| SNA4 | 2007 | 13 | 9 | 28 | 46.461 | P | 0.200 | -0.299 |

|      |      |    |   |    |        |   |       |        |
|------|------|----|---|----|--------|---|-------|--------|
| SNA3 | 2007 | 13 | 9 | 28 | 46.610 | P | 0.200 | 0.194  |
| MHC  | 2007 | 13 | 9 | 28 | 46.626 | P | 0.200 | -0.210 |
| SNA5 | 2007 | 13 | 9 | 28 | 46.977 | P | 0.200 | -0.327 |
| WCN  | 2007 | 13 | 9 | 28 | 47.033 | P | 0.200 | 0.100  |
| O07A | 2007 | 13 | 9 | 28 | 47.247 | P | 0.200 | 0.213  |
| S04C | 2007 | 13 | 9 | 28 | 47.361 | P | 0.200 | -0.057 |
| SNB9 | 2007 | 13 | 9 | 28 | 47.539 | P | 0.200 | 0.198  |
| N08A | 2007 | 13 | 9 | 28 | 47.793 | P | 0.200 | 0.167  |
| SNA7 | 2007 | 13 | 9 | 28 | 47.800 | P | 0.200 | 0.257  |
| R05C | 2007 | 13 | 9 | 28 | 47.987 | P | 0.200 | -0.096 |
| SN93 | 2007 | 13 | 9 | 28 | 48.197 | P | 0.200 | 0.467  |
| SNA8 | 2007 | 13 | 9 | 28 | 48.522 | P | 0.200 | 0.040  |
| SN95 | 2007 | 13 | 9 | 28 | 48.552 | P | 0.200 | -0.169 |
| SN97 | 2007 | 13 | 9 | 28 | 48.841 | P | 0.200 | 0.100  |
| SN96 | 2007 | 13 | 9 | 28 | 49.161 | P | 0.200 | 0.000  |
| CMB  | 2007 | 13 | 9 | 28 | 49.209 | P | 0.200 | -0.010 |
| SAO  | 2007 | 13 | 9 | 28 | 49.494 | P | 0.200 | -0.377 |
| PACP | 2007 | 13 | 9 | 28 | 49.529 | P | 0.200 | -0.117 |
| SN84 | 2007 | 13 | 9 | 28 | 49.578 | P | 0.200 | -0.409 |
| P07A | 2007 | 13 | 9 | 28 | 49.789 | P | 0.200 | 0.204  |
| O08A | 2007 | 13 | 9 | 28 | 49.911 | P | 0.200 | 0.376  |
| SN98 | 2007 | 13 | 9 | 28 | 49.982 | P | 0.200 | 0.156  |
| SN85 | 2007 | 13 | 9 | 28 | 50.208 | P | 0.200 | -0.123 |
| SN86 | 2007 | 13 | 9 | 28 | 50.233 | P | 0.200 | 0.045  |
| HAST | 2007 | 13 | 9 | 28 | 50.641 | P | 0.200 | -0.370 |
| R06C | 2007 | 13 | 9 | 28 | 51.659 | P | 0.200 | 0.229  |
| S05C | 2007 | 13 | 9 | 28 | 51.681 | P | 0.200 | -0.584 |
| S06C | 2007 | 13 | 9 | 28 | 51.965 | P | 0.200 | -0.326 |
| SN75 | 2007 | 13 | 9 | 28 | 52.053 | P | 0.200 | -0.096 |
| Q07A | 2007 | 13 | 9 | 28 | 52.344 | P | 0.200 | 0.127  |
| P08A | 2007 | 13 | 9 | 28 | 52.760 | P | 0.200 | 0.542  |
| SN63 | 2007 | 13 | 9 | 28 | 52.797 | P | 0.200 | -0.460 |
| BMN  | 2007 | 13 | 9 | 28 | 52.962 | P | 0.200 | 0.138  |
| T05C | 2007 | 13 | 9 | 28 | 53.020 | P | 0.200 | 0.369  |
| SN64 | 2007 | 13 | 9 | 28 | 53.185 | P | 0.200 | -0.233 |
| SN65 | 2007 | 13 | 9 | 28 | 53.347 | P | 0.200 | -0.118 |
| V03C | 2007 | 13 | 9 | 28 | 53.866 | P | 0.200 | 0.104  |
| O09A | 2007 | 13 | 9 | 28 | 54.412 | P | 0.200 | 0.529  |
| SN55 | 2007 | 13 | 9 | 28 | 54.548 | P | 0.200 | -0.102 |
| U04C | 2007 | 13 | 9 | 28 | 54.549 | P | 0.200 | 0.114  |
| R07C | 2007 | 13 | 9 | 28 | 55.184 | P | 0.200 | 0.211  |
| SN43 | 2007 | 13 | 9 | 28 | 55.630 | P | 0.200 | -0.320 |
| T06C | 2007 | 13 | 9 | 28 | 55.906 | P | 0.200 | -0.401 |
| Q08A | 2007 | 13 | 9 | 28 | 56.296 | P | 0.200 | -0.052 |
| PKD  | 2007 | 13 | 9 | 28 | 56.802 | P | 0.200 | -0.374 |
| P09A | 2007 | 13 | 9 | 28 | 56.956 | P | 0.200 | 0.192  |
| SN34 | 2007 | 13 | 9 | 28 | 57.642 | P | 0.200 | -0.160 |
| R08A | 2007 | 13 | 9 | 28 | 57.728 | P | 0.200 | 0.148  |
| U05C | 2007 | 13 | 9 | 28 | 57.732 | P | 0.200 | 0.541  |
| MLAC | 2007 | 13 | 9 | 28 | 58.304 | P | 0.200 | 0.572  |
| PHL  | 2007 | 13 | 9 | 28 | 59.206 | P | 0.200 | -0.019 |
| P10A | 2007 | 13 | 9 | 28 | 59.519 | P | 0.200 | 0.255  |
| Q09A | 2007 | 13 | 9 | 28 | 59.586 | P | 0.200 | 0.147  |
| SN14 | 2007 | 13 | 9 | 28 | 59.834 | P | 0.200 | -0.212 |
| HELL | 2007 | 13 | 9 | 28 | 59.939 | P | 0.200 | -0.723 |
| V05C | 2007 | 13 | 9 | 29 | 0.441  | P | 0.200 | 0.395  |
| RCT  | 2007 | 13 | 9 | 29 | 0.460  | P | 0.200 | -0.541 |
| S08C | 2007 | 13 | 9 | 29 | 1.260  | P | 0.200 | 0.156  |
| SMM  | 2007 | 13 | 9 | 29 | 2.231  | P | 0.200 | 0.129  |
| R09A | 2007 | 13 | 9 | 29 | 2.233  | P | 0.200 | -0.177 |
| TIN  | 2007 | 13 | 9 | 29 | 2.601  | P | 0.200 | 0.084  |
| VES  | 2007 | 13 | 9 | 29 | 2.745  | P | 0.200 | -0.960 |
| S09A | 2007 | 13 | 9 | 29 | 3.783  | P | 0.200 | -0.153 |

|      |      |    |   |    |        |   |       |        |
|------|------|----|---|----|--------|---|-------|--------|
| MPP  | 2007 | 13 | 9 | 29 | 4.764  | P | 0.200 | 0.002  |
| R10A | 2007 | 13 | 9 | 29 | 5.213  | P | 0.200 | -0.190 |
| CWC  | 2007 | 13 | 9 | 29 | 5.409  | P | 0.200 | -0.282 |
| Q11A | 2007 | 13 | 9 | 29 | 5.427  | P | 0.200 | -0.280 |
| ISA  | 2007 | 13 | 9 | 29 | 5.984  | P | 0.200 | -1.023 |
| GRA  | 2007 | 13 | 9 | 29 | 6.358  | P | 0.200 | 0.251  |
| ARV  | 2007 | 13 | 9 | 29 | 7.014  | P | 0.200 | -0.684 |
| MPM  | 2007 | 13 | 9 | 29 | 9.379  | P | 0.200 | -0.347 |
| OSI  | 2007 | 13 | 9 | 29 | 10.130 | P | 0.200 | -0.265 |
| LGU  | 2007 | 13 | 9 | 29 | 10.243 | P | 0.200 | -0.782 |
| FUR  | 2007 | 13 | 9 | 29 | 10.255 | P | 0.200 | 0.039  |
| LRL  | 2007 | 13 | 9 | 29 | 10.675 | P | 0.200 | -0.535 |
| SLA  | 2007 | 13 | 9 | 29 | 10.865 | P | 0.200 | -0.303 |
| TOV  | 2007 | 13 | 9 | 29 | 11.123 | P | 0.200 | -0.686 |
| EDW2 | 2007 | 13 | 9 | 29 | 12.061 | P | 0.200 | -0.149 |
| DJJ  | 2007 | 13 | 9 | 29 | 12.654 | P | 0.200 | -0.828 |
| DEC  | 2007 | 13 | 9 | 29 | 12.948 | P | 0.200 | -0.535 |
| U10A | 2007 | 13 | 9 | 29 | 12.974 | P | 0.200 | 0.285  |
| VCS  | 2007 | 13 | 9 | 29 | 13.393 | P | 0.200 | -0.094 |
| PASC | 2007 | 13 | 9 | 29 | 13.706 | P | 0.200 | -0.640 |
| MWC  | 2007 | 13 | 9 | 29 | 14.416 | P | 0.200 | -0.539 |
| SHO  | 2007 | 13 | 9 | 29 | 14.744 | P | 0.200 | -0.415 |
| GSC  | 2007 | 13 | 9 | 29 | 15.058 | P | 0.200 | -0.409 |
| FMP  | 2007 | 13 | 9 | 29 | 15.204 | P | 0.200 | -0.487 |
| BFS  | 2007 | 13 | 9 | 29 | 15.906 | P | 0.200 | -0.513 |
| ADO  | 2007 | 13 | 9 | 29 | 15.941 | P | 0.200 | -0.150 |
| CIA  | 2007 | 13 | 9 | 29 | 15.942 | P | 0.200 | -0.706 |
| RRX  | 2007 | 13 | 9 | 29 | 16.141 | P | 0.200 | -0.207 |
| U11A | 2007 | 13 | 9 | 29 | 16.727 | P | 0.200 | 0.170  |
| TUQ  | 2007 | 13 | 9 | 29 | 18.235 | P | 0.200 | -0.312 |
| SVD  | 2007 | 13 | 9 | 29 | 18.707 | P | 0.200 | -0.557 |
| V11A | 2007 | 13 | 9 | 29 | 18.707 | P | 0.200 | -0.241 |
| SDD  | 2007 | 13 | 9 | 29 | 18.883 | P | 0.200 | -0.145 |
| BBR  | 2007 | 13 | 9 | 29 | 18.938 | P | 0.200 | -0.641 |
| HEC  | 2007 | 13 | 9 | 29 | 19.029 | P | 0.200 | -0.351 |

|      |      |     |    |         |          |           |         |       |       |
|------|------|-----|----|---------|----------|-----------|---------|-------|-------|
| 2006 | 341  | 19  | 10 | 22.5992 | 46.15300 | 154.38600 | 16.0000 | 250   | 0.014 |
| K01A | 2006 | 341 | 19 | 19      | 57.524   | P         | 0.200   | 0.662 |       |
| I03A | 2006 | 341 | 19 | 19      | 58.177   | P         | 0.200   | 0.804 |       |
| J02A | 2006 | 341 | 19 | 19      | 59.361   | P         | 0.200   | 0.763 |       |
| DBO  | 2006 | 341 | 19 | 20      | 1.934    | P         | 0.200   | 0.810 |       |
| J03A | 2006 | 341 | 19 | 20      | 2.029    | P         | 0.200   | 0.842 |       |
| K02A | 2006 | 341 | 19 | 20      | 2.080    | P         | 0.200   | 0.721 |       |
| I04A | 2006 | 341 | 19 | 20      | 2.168    | P         | 0.200   | 0.202 |       |
| M01C | 2006 | 341 | 19 | 20      | 3.118    | P         | 0.200   | 0.994 |       |
| L02A | 2006 | 341 | 19 | 20      | 4.002    | P         | 0.200   | 0.718 |       |
| HUMO | 2006 | 341 | 19 | 20      | 4.988    | P         | 0.200   | 0.709 |       |
| J04A | 2006 | 341 | 19 | 20      | 6.134    | P         | 0.200   | 0.447 |       |
| JCC  | 2006 | 341 | 19 | 20      | 7.705    | P         | 0.200   | 0.940 |       |
| YBH  | 2006 | 341 | 19 | 20      | 9.849    | P         | 0.200   | 0.914 |       |
| J05A | 2006 | 341 | 19 | 20      | 9.879    | P         | 0.200   | 0.817 |       |
| K04A | 2006 | 341 | 19 | 20      | 10.137   | P         | 0.200   | 0.503 |       |
| N02C | 2006 | 341 | 19 | 20      | 10.614   | P         | 0.200   | 0.635 |       |
| M02C | 2006 | 341 | 19 | 20      | 10.710   | P         | 0.200   | 1.042 |       |
| L04A | 2006 | 341 | 19 | 20      | 11.230   | P         | 0.200   | 0.514 |       |
| O01C | 2006 | 341 | 19 | 20      | 11.550   | P         | 0.200   | 1.112 |       |
| M04C | 2006 | 341 | 19 | 20      | 13.099   | P         | 0.200   | 0.487 |       |
| K05A | 2006 | 341 | 19 | 20      | 13.692   | P         | 0.200   | 0.870 |       |
| M03C | 2006 | 341 | 19 | 20      | 13.757   | P         | 0.200   | 0.338 |       |
| WDC  | 2006 | 341 | 19 | 20      | 14.686   | P         | 0.200   | 0.432 |       |
| O02C | 2006 | 341 | 19 | 20      | 15.716   | P         | 0.200   | 0.704 |       |
| P01C | 2006 | 341 | 19 | 20      | 15.776   | P         | 0.200   | 0.433 |       |
| L05A | 2006 | 341 | 19 | 20      | 16.509   | P         | 0.200   | 0.635 |       |

|      |      |     |    |    |        |   |       |        |
|------|------|-----|----|----|--------|---|-------|--------|
| M05C | 2006 | 341 | 19 | 20 | 17.595 | P | 0.200 | 0.290  |
| GASB | 2006 | 341 | 19 | 20 | 18.328 | P | 0.200 | 0.775  |
| HATC | 2006 | 341 | 19 | 20 | 18.474 | P | 0.200 | 0.348  |
| HOPS | 2006 | 341 | 19 | 20 | 18.701 | P | 0.200 | 0.106  |
| O03C | 2006 | 341 | 19 | 20 | 18.736 | P | 0.200 | -0.191 |
| SNG5 | 2006 | 341 | 19 | 20 | 21.709 | P | 0.200 | -0.562 |
| M06C | 2006 | 341 | 19 | 20 | 21.219 | P | 0.200 | 0.379  |
| O04C | 2006 | 341 | 19 | 20 | 22.170 | P | 0.200 | 0.306  |
| MCCM | 2006 | 341 | 19 | 20 | 22.409 | P | 0.200 | -0.364 |
| MNRC | 2006 | 341 | 19 | 20 | 22.424 | P | 0.200 | 0.528  |
| ORV  | 2006 | 341 | 19 | 20 | 22.453 | P | 0.200 | -0.628 |
| SUTB | 2006 | 341 | 19 | 20 | 22.518 | P | 0.200 | -0.632 |
| ELFS | 2006 | 341 | 19 | 20 | 22.567 | P | 0.200 | 0.469  |
| L07A | 2006 | 341 | 19 | 20 | 22.805 | P | 0.200 | 0.425  |
| SNF6 | 2006 | 341 | 19 | 20 | 24.032 | P | 0.200 | -0.391 |
| CVS  | 2006 | 341 | 19 | 20 | 23.667 | P | 0.200 | -0.248 |
| SNE4 | 2006 | 341 | 19 | 20 | 24.780 | P | 0.200 | -0.116 |
| FARB | 2006 | 341 | 19 | 20 | 23.788 | P | 0.200 | -0.302 |
| O05C | 2006 | 341 | 19 | 20 | 23.966 | P | 0.200 | 0.055  |
| SNE5 | 2006 | 341 | 19 | 20 | 25.060 | P | 0.200 | -0.282 |
| SNE6 | 2006 | 341 | 19 | 20 | 25.773 | P | 0.200 | -0.584 |
| N06A | 2006 | 341 | 19 | 20 | 25.510 | P | 0.200 | 0.084  |
| SND7 | 2006 | 341 | 19 | 20 | 26.617 | P | 0.200 | -0.263 |
| Q03C | 2006 | 341 | 19 | 20 | 25.650 | P | 0.200 | 1.033  |
| SND5 | 2006 | 341 | 19 | 20 | 26.735 | P | 0.200 | -0.339 |
| M07A | 2006 | 341 | 19 | 20 | 25.851 | P | 0.200 | 0.320  |
| SND4 | 2006 | 341 | 19 | 20 | 26.314 | P | 0.200 | -0.326 |
| BRK  | 2006 | 341 | 19 | 20 | 26.388 | P | 0.200 | -0.341 |
| Q04C | 2006 | 341 | 19 | 20 | 26.448 | P | 0.200 | -0.019 |
| BEK  | 2006 | 341 | 19 | 20 | 26.589 | P | 0.200 | -0.339 |
| BKS  | 2006 | 341 | 19 | 20 | 26.687 | P | 0.200 | -0.082 |
| BRIB | 2006 | 341 | 19 | 20 | 27.023 | P | 0.200 | 0.109  |
| SND8 | 2006 | 341 | 19 | 20 | 28.053 | P | 0.200 | -0.276 |
| SNC4 | 2006 | 341 | 19 | 20 | 28.139 | P | 0.200 | -0.261 |
| SNC5 | 2006 | 341 | 19 | 20 | 28.185 | P | 0.200 | -0.284 |
| O06A | 2006 | 341 | 19 | 20 | 27.850 | P | 0.200 | 0.036  |
| SNC7 | 2006 | 341 | 19 | 20 | 28.901 | P | 0.200 | -0.215 |
| P05C | 2006 | 341 | 19 | 20 | 28.015 | P | 0.200 | -0.130 |
| BDM  | 2006 | 341 | 19 | 20 | 28.118 | P | 0.200 | 0.027  |
| SNC3 | 2006 | 341 | 19 | 20 | 28.339 | P | 0.200 | 0.540  |
| JRSC | 2006 | 341 | 19 | 20 | 28.392 | P | 0.200 | -0.400 |
| SNB3 | 2006 | 341 | 19 | 20 | 29.454 | P | 0.200 | 0.093  |
| N07B | 2006 | 341 | 19 | 20 | 28.947 | P | 0.200 | 0.043  |
| SNB5 | 2006 | 341 | 19 | 20 | 30.027 | P | 0.200 | -0.243 |
| LAVA | 2006 | 341 | 19 | 20 | 29.426 | P | 0.200 | -0.302 |
| P06A | 2006 | 341 | 19 | 20 | 29.666 | P | 0.200 | 0.208  |
| BNLO | 2006 | 341 | 19 | 20 | 29.716 | P | 0.200 | -0.508 |
| WENL | 2006 | 341 | 19 | 20 | 29.970 | P | 0.200 | -0.003 |
| SNB7 | 2006 | 341 | 19 | 20 | 31.132 | P | 0.200 | -0.084 |
| SNA4 | 2006 | 341 | 19 | 20 | 31.402 | P | 0.200 | -0.250 |
| R04C | 2006 | 341 | 19 | 20 | 30.456 | P | 0.200 | -0.294 |
| SNA3 | 2006 | 341 | 19 | 20 | 31.457 | P | 0.200 | 0.142  |
| SNA7 | 2006 | 341 | 19 | 20 | 32.563 | P | 0.200 | 0.160  |
| MHC  | 2006 | 341 | 19 | 20 | 31.684 | P | 0.200 | -0.111 |
| WCN  | 2006 | 341 | 19 | 20 | 31.879 | P | 0.200 | 0.100  |
| O07A | 2006 | 341 | 19 | 20 | 31.998 | P | 0.200 | 0.162  |
| S04C | 2006 | 341 | 19 | 20 | 32.210 | P | 0.200 | -0.153 |
| SNA8 | 2006 | 341 | 19 | 20 | 33.382 | P | 0.200 | 0.039  |
| N08A | 2006 | 341 | 19 | 20 | 32.463 | P | 0.200 | 0.071  |
| SN97 | 2006 | 341 | 19 | 20 | 33.668 | P | 0.200 | 0.042  |
| R05C | 2006 | 341 | 19 | 20 | 32.868 | P | 0.200 | -0.099 |
| SN93 | 2006 | 341 | 19 | 20 | 33.109 | P | 0.200 | 0.463  |
| SN96 | 2006 | 341 | 19 | 20 | 34.107 | P | 0.200 | 0.043  |

|      |      |     |    |    |        |   |       |        |
|------|------|-----|----|----|--------|---|-------|--------|
| CMB  | 2006 | 341 | 19 | 20 | 34.131 | P | 0.200 | -0.022 |
| PACP | 2006 | 341 | 19 | 20 | 34.611 | P | 0.200 | -0.027 |
| P07A | 2006 | 341 | 19 | 20 | 34.627 | P | 0.200 | 0.200  |
| SAO  | 2006 | 341 | 19 | 20 | 34.641 | P | 0.200 | -0.237 |
| O08A | 2006 | 341 | 19 | 20 | 34.710 | P | 0.200 | 0.362  |
| HAST | 2006 | 341 | 19 | 20 | 35.763 | P | 0.200 | -0.282 |
| R06C | 2006 | 341 | 19 | 20 | 36.506 | P | 0.200 | 0.166  |
| S05C | 2006 | 341 | 19 | 20 | 36.646 | P | 0.200 | -0.600 |
| S06C | 2006 | 341 | 19 | 20 | 36.950 | P | 0.200 | -0.291 |
| Q07A | 2006 | 341 | 19 | 20 | 37.370 | P | 0.200 | 0.259  |
| P08A | 2006 | 341 | 19 | 20 | 37.596 | P | 0.200 | 0.527  |
| BMN  | 2006 | 341 | 19 | 20 | 37.762 | P | 0.200 | 0.122  |
| T05C | 2006 | 341 | 19 | 20 | 38.013 | P | 0.200 | 0.353  |
| V03C | 2006 | 341 | 19 | 20 | 38.963 | P | 0.200 | 0.141  |
| O09A | 2006 | 341 | 19 | 20 | 39.228 | P | 0.200 | 0.514  |
| SN43 | 2006 | 341 | 19 | 20 | 40.597 | P | 0.200 | -0.325 |
| U04C | 2006 | 341 | 19 | 20 | 39.626 | P | 0.200 | 0.154  |
| R07C | 2006 | 341 | 19 | 20 | 40.012 | P | 0.200 | 0.105  |
| T06C | 2006 | 341 | 19 | 20 | 40.947 | P | 0.200 | -0.358 |
| Q08A | 2006 | 341 | 19 | 20 | 41.184 | P | 0.200 | -0.059 |
| P09A | 2006 | 341 | 19 | 20 | 41.759 | P | 0.200 | 0.134  |
| PKD  | 2006 | 341 | 19 | 20 | 41.957 | P | 0.200 | -0.281 |
| RAMR | 2006 | 341 | 19 | 20 | 42.251 | P | 0.200 | 0.252  |
| R08A | 2006 | 341 | 19 | 20 | 42.697 | P | 0.200 | 0.185  |
| U05C | 2006 | 341 | 19 | 20 | 42.764 | P | 0.200 | 0.528  |
| MLAC | 2006 | 341 | 19 | 20 | 43.111 | P | 0.200 | 0.411  |
| P10A | 2006 | 341 | 19 | 20 | 44.175 | P | 0.200 | 0.032  |
| PHL  | 2006 | 341 | 19 | 20 | 44.396 | P | 0.200 | 0.063  |
| Q09A | 2006 | 341 | 19 | 20 | 44.482 | P | 0.200 | 0.121  |
| HELL | 2006 | 341 | 19 | 20 | 44.955 | P | 0.200 | -0.744 |
| RCT  | 2006 | 341 | 19 | 20 | 45.398 | P | 0.200 | -0.659 |
| V05C | 2006 | 341 | 19 | 20 | 45.554 | P | 0.200 | 0.426  |
| S08C | 2006 | 341 | 19 | 20 | 46.230 | P | 0.200 | 0.133  |
| R09A | 2006 | 341 | 19 | 20 | 47.116 | P | 0.200 | -0.245 |
| TPH  | 2006 | 341 | 19 | 20 | 47.287 | P | 0.200 | -0.210 |
| SMM  | 2006 | 341 | 19 | 20 | 47.329 | P | 0.200 | 0.112  |
| TIN  | 2006 | 341 | 19 | 20 | 47.499 | P | 0.200 | -0.029 |
| VES  | 2006 | 341 | 19 | 20 | 47.864 | P | 0.200 | -0.915 |
| S09A | 2006 | 341 | 19 | 20 | 48.747 | P | 0.200 | -0.163 |
| MPP  | 2006 | 341 | 19 | 20 | 49.990 | P | 0.200 | 0.094  |
| R10A | 2006 | 341 | 19 | 20 | 50.200 | P | 0.200 | -0.145 |
| Q11A | 2006 | 341 | 19 | 20 | 50.387 | P | 0.200 | -0.235 |
| CWC  | 2006 | 341 | 19 | 20 | 50.446 | P | 0.200 | -0.288 |
| ISA  | 2006 | 341 | 19 | 20 | 51.068 | P | 0.200 | -1.030 |
| GRA  | 2006 | 341 | 19 | 20 | 51.365 | P | 0.200 | 0.245  |
| SBC  | 2006 | 341 | 19 | 20 | 51.940 | P | 0.200 | -0.070 |
| ARV  | 2006 | 341 | 19 | 20 | 52.030 | P | 0.200 | -0.791 |
| SCZ2 | 2006 | 341 | 19 | 20 | 53.651 | P | 0.200 | -0.520 |
| MPM  | 2006 | 341 | 19 | 20 | 54.393 | P | 0.200 | -0.402 |
| FUR  | 2006 | 341 | 19 | 20 | 55.198 | P | 0.200 | -0.074 |
| OSI  | 2006 | 341 | 19 | 20 | 55.329 | P | 0.200 | -0.219 |
| LGU  | 2006 | 341 | 19 | 20 | 55.423 | P | 0.200 | -0.790 |
| LRL  | 2006 | 341 | 19 | 20 | 55.775 | P | 0.200 | -0.546 |
| SLA  | 2006 | 341 | 19 | 20 | 55.942 | P | 0.200 | -0.315 |
| TOV  | 2006 | 341 | 19 | 20 | 56.401 | P | 0.200 | -0.592 |
| EDW2 | 2006 | 341 | 19 | 20 | 57.197 | P | 0.200 | -0.160 |
| SNCC | 2006 | 341 | 19 | 20 | 57.516 | P | 0.200 | -0.407 |
| U10A | 2006 | 341 | 19 | 20 | 57.924 | P | 0.200 | 0.176  |
| DJJ  | 2006 | 341 | 19 | 20 | 57.936 | P | 0.200 | -0.741 |
| DEC  | 2006 | 341 | 19 | 20 | 58.022 | P | 0.200 | -0.642 |
| VCS  | 2006 | 341 | 19 | 20 | 58.553 | P | 0.200 | -0.101 |
| PASC | 2006 | 341 | 19 | 20 | 58.885 | P | 0.200 | -0.649 |
| CHF  | 2006 | 341 | 19 | 20 | 59.366 | P | 0.200 | -0.332 |

|      |      |     |    |    |        |   |       |        |
|------|------|-----|----|----|--------|---|-------|--------|
| MWC  | 2006 | 341 | 19 | 20 | 59.542 | P | 0.200 | -0.602 |
| USC  | 2006 | 341 | 19 | 20 | 59.654 | P | 0.200 | -0.095 |
| SHO  | 2006 | 341 | 19 | 20 | 59.826 | P | 0.200 | -0.429 |
| RPV  | 2006 | 341 | 19 | 20 | 59.873 | P | 0.200 | -0.609 |
| GSC  | 2006 | 341 | 19 | 21 | 0.174  | P | 0.200 | -0.419 |
| FMP  | 2006 | 341 | 19 | 21 | 0.412  | P | 0.200 | -0.495 |
| BFS  | 2006 | 341 | 19 | 21 | 1.033  | P | 0.200 | -0.572 |
| ADO  | 2006 | 341 | 19 | 21 | 1.050  | P | 0.200 | -0.212 |
| RRX  | 2006 | 341 | 19 | 21 | 1.232  | P | 0.200 | -0.267 |
| VTV  | 2006 | 341 | 19 | 21 | 1.237  | P | 0.200 | -0.276 |
| CIA  | 2006 | 341 | 19 | 21 | 1.270  | P | 0.200 | -0.611 |
| U11A | 2006 | 341 | 19 | 21 | 1.685  | P | 0.200 | 0.063  |
| TUQ  | 2006 | 341 | 19 | 21 | 3.299  | P | 0.200 | -0.368 |
| V11A | 2006 | 341 | 19 | 21 | 3.750  | P | 0.200 | -0.290 |
| SVD  | 2006 | 341 | 19 | 21 | 3.795  | P | 0.200 | -0.661 |
| BBR  | 2006 | 341 | 19 | 21 | 4.068  | P | 0.200 | -0.692 |
| HEC  | 2006 | 341 | 19 | 21 | 4.077  | P | 0.200 | -0.451 |
| SDD  | 2006 | 341 | 19 | 21 | 4.103  | P | 0.200 | -0.151 |

|      |     |    |   |         |          |           |         |     |       |
|------|-----|----|---|---------|----------|-----------|---------|-----|-------|
| 2007 | 212 | 15 | 7 | 36.0722 | 27.34300 | 126.89700 | 10.0000 | 342 | 0.001 |
|------|-----|----|---|---------|----------|-----------|---------|-----|-------|

|      |      |     |    |    |        |   |       |        |
|------|------|-----|----|----|--------|---|-------|--------|
| J02A | 2007 | 212 | 15 | 20 | 9.830  | P | 0.200 | 0.464  |
| K02A | 2007 | 212 | 15 | 20 | 11.330 | P | 0.200 | 0.139  |
| DBO  | 2007 | 212 | 15 | 20 | 11.478 | P | 0.200 | 0.339  |
| I04A | 2007 | 212 | 15 | 20 | 11.514 | P | 0.200 | -0.211 |
| J03A | 2007 | 212 | 15 | 20 | 11.544 | P | 0.200 | 0.396  |
| HUMO | 2007 | 212 | 15 | 20 | 13.767 | P | 0.200 | 0.453  |
| J04A | 2007 | 212 | 15 | 20 | 14.362 | P | 0.200 | -0.083 |
| JCC  | 2007 | 212 | 15 | 20 | 15.013 | P | 0.200 | 0.310  |
| YBH  | 2007 | 212 | 15 | 20 | 16.920 | P | 0.200 | 0.474  |
| J05A | 2007 | 212 | 15 | 20 | 17.065 | P | 0.200 | 0.326  |
| N02C | 2007 | 212 | 15 | 20 | 17.137 | P | 0.200 | 0.118  |
| K04A | 2007 | 212 | 15 | 20 | 17.193 | P | 0.200 | 0.107  |
| M02C | 2007 | 212 | 15 | 20 | 17.552 | P | 0.200 | 0.639  |
| L04A | 2007 | 212 | 15 | 20 | 17.867 | P | 0.200 | 0.074  |
| M04C | 2007 | 212 | 15 | 20 | 19.154 | P | 0.200 | 0.026  |
| M03C | 2007 | 212 | 15 | 20 | 19.333 | P | 0.200 | -0.314 |
| K05A | 2007 | 212 | 15 | 20 | 19.893 | P | 0.200 | 0.519  |
| WDC  | 2007 | 212 | 15 | 20 | 19.980 | P | 0.200 | -0.036 |
| O02C | 2007 | 212 | 15 | 20 | 20.851 | P | 0.200 | 0.280  |
| L05A | 2007 | 212 | 15 | 20 | 21.708 | P | 0.200 | 0.183  |
| M05C | 2007 | 212 | 15 | 20 | 22.271 | P | 0.200 | -0.177 |
| GASB | 2007 | 212 | 15 | 20 | 22.784 | P | 0.200 | 0.534  |
| HATC | 2007 | 212 | 15 | 20 | 22.905 | P | 0.200 | 0.009  |
| SNG5 | 2007 | 212 | 15 | 20 | 24.779 | P | 0.200 | -0.757 |
| M06C | 2007 | 212 | 15 | 20 | 25.047 | P | 0.200 | 0.191  |
| ORV  | 2007 | 212 | 15 | 20 | 25.351 | P | 0.200 | -0.813 |
| O04C | 2007 | 212 | 15 | 20 | 25.391 | P | 0.200 | -0.038 |
| MNRC | 2007 | 212 | 15 | 20 | 25.414 | P | 0.200 | 0.239  |
| SNG7 | 2007 | 212 | 15 | 20 | 25.450 | P | 0.200 | -0.425 |
| SUTB | 2007 | 212 | 15 | 20 | 25.452 | P | 0.200 | -0.612 |
| ELFS | 2007 | 212 | 15 | 20 | 25.853 | P | 0.200 | 0.223  |
| CVS  | 2007 | 212 | 15 | 20 | 25.927 | P | 0.200 | -0.464 |
| SNF6 | 2007 | 212 | 15 | 20 | 26.496 | P | 0.200 | -0.605 |
| L07A | 2007 | 212 | 15 | 20 | 26.578 | P | 0.200 | 0.514  |
| O05C | 2007 | 212 | 15 | 20 | 26.713 | P | 0.200 | -0.016 |
| SNE4 | 2007 | 212 | 15 | 20 | 27.019 | P | 0.200 | -0.213 |
| SNE5 | 2007 | 212 | 15 | 20 | 27.231 | P | 0.200 | -0.479 |
| SNF8 | 2007 | 212 | 15 | 20 | 27.406 | P | 0.200 | -0.295 |
| SNF9 | 2007 | 212 | 15 | 20 | 27.573 | P | 0.200 | -0.219 |
| SNE7 | 2007 | 212 | 15 | 20 | 27.599 | P | 0.200 | -0.271 |
| SNE6 | 2007 | 212 | 15 | 20 | 27.781 | P | 0.200 | -0.688 |
| BRK  | 2007 | 212 | 15 | 20 | 27.833 | P | 0.200 | -0.405 |
| N06A | 2007 | 212 | 15 | 20 | 28.086 | P | 0.200 | 0.104  |



|      |      |     |    |    |        |   |       |        |
|------|------|-----|----|----|--------|---|-------|--------|
| SND4 | 2007 | 212 | 15 | 20 | 28.087 | P | 0.200 | -0.424 |
| BRIB | 2007 | 212 | 15 | 20 | 28.302 | P | 0.200 | 0.006  |
| Q04C | 2007 | 212 | 15 | 20 | 28.339 | P | 0.200 | 0.086  |
| SND5 | 2007 | 212 | 15 | 20 | 28.387 | P | 0.200 | -0.424 |
| SND7 | 2007 | 212 | 15 | 20 | 28.544 | P | 0.200 | -0.250 |
| M07A | 2007 | 212 | 15 | 20 | 28.557 | P | 0.200 | 0.458  |
| BEK  | 2007 | 212 | 15 | 20 | 28.588 | P | 0.200 | -0.391 |
| SNE9 | 2007 | 212 | 15 | 20 | 28.867 | P | 0.200 | -0.142 |
| SNC4 | 2007 | 212 | 15 | 20 | 29.308 | P | 0.200 | -0.342 |
| SNC5 | 2007 | 212 | 15 | 20 | 29.420 | P | 0.200 | -0.327 |
| SNC3 | 2007 | 212 | 15 | 20 | 29.451 | P | 0.200 | 0.299  |
| P05C | 2007 | 212 | 15 | 20 | 29.518 | P | 0.200 | -0.114 |
| O06A | 2007 | 212 | 15 | 20 | 29.549 | P | 0.200 | 0.014  |
| SND8 | 2007 | 212 | 15 | 20 | 29.673 | P | 0.200 | -0.168 |
| BNLO | 2007 | 212 | 15 | 20 | 30.060 | P | 0.200 | -0.382 |
| SND9 | 2007 | 212 | 15 | 20 | 30.134 | P | 0.200 | 0.068  |
| SNC7 | 2007 | 212 | 15 | 20 | 30.243 | P | 0.200 | -0.139 |
| LAVA | 2007 | 212 | 15 | 20 | 30.293 | P | 0.200 | -0.332 |
| SNB3 | 2007 | 212 | 15 | 20 | 30.300 | P | 0.200 | -0.004 |
| SNC6 | 2007 | 212 | 15 | 20 | 30.619 | P | 0.200 | -0.124 |
| N07B | 2007 | 212 | 15 | 20 | 30.713 | P | 0.200 | 0.298  |
| P06A | 2007 | 212 | 15 | 20 | 30.764 | P | 0.200 | 0.166  |
| SNB5 | 2007 | 212 | 15 | 20 | 30.817 | P | 0.200 | -0.196 |
| MHC  | 2007 | 212 | 15 | 20 | 31.550 | P | 0.200 | -0.189 |
| SNA4 | 2007 | 212 | 15 | 20 | 31.640 | P | 0.200 | -0.255 |
| SNA3 | 2007 | 212 | 15 | 20 | 31.735 | P | 0.200 | 0.137  |
| SNB7 | 2007 | 212 | 15 | 20 | 31.750 | P | 0.200 | -0.054 |
| SNB6 | 2007 | 212 | 15 | 20 | 31.772 | P | 0.200 | -0.169 |
| S04C | 2007 | 212 | 15 | 20 | 31.938 | P | 0.200 | -0.245 |
| SNA5 | 2007 | 212 | 15 | 20 | 32.193 | P | 0.200 | -0.231 |
| WCN  | 2007 | 212 | 15 | 20 | 32.458 | P | 0.200 | 0.254  |
| O07A | 2007 | 212 | 15 | 20 | 32.738 | P | 0.200 | 0.344  |
| SNB9 | 2007 | 212 | 15 | 20 | 32.788 | P | 0.200 | 0.301  |
| SN93 | 2007 | 212 | 15 | 20 | 32.967 | P | 0.200 | 0.523  |
| R05C | 2007 | 212 | 15 | 20 | 33.029 | P | 0.200 | 0.098  |
| SNA7 | 2007 | 212 | 15 | 20 | 33.043 | P | 0.200 | 0.446  |
| N08A | 2007 | 212 | 15 | 20 | 33.317 | P | 0.200 | 0.461  |
| CMB  | 2007 | 212 | 15 | 20 | 33.393 | P | 0.200 | -0.123 |
| SAO  | 2007 | 212 | 15 | 20 | 33.531 | P | 0.200 | -0.123 |
| SN97 | 2007 | 212 | 15 | 20 | 33.597 | P | 0.200 | 0.193  |
| PACP | 2007 | 212 | 15 | 20 | 33.681 | P | 0.200 | 0.098  |
| SN96 | 2007 | 212 | 15 | 20 | 33.794 | P | 0.200 | 0.087  |
| SN98 | 2007 | 212 | 15 | 20 | 34.308 | P | 0.200 | 0.156  |
| P07A | 2007 | 212 | 15 | 20 | 34.460 | P | 0.200 | 0.289  |
| SN86 | 2007 | 212 | 15 | 20 | 34.601 | P | 0.200 | 0.172  |
| SN87 | 2007 | 212 | 15 | 20 | 34.822 | P | 0.200 | 0.392  |
| S05C | 2007 | 212 | 15 | 20 | 35.213 | P | 0.200 | -0.342 |
| S06C | 2007 | 212 | 15 | 20 | 35.476 | P | 0.200 | -0.289 |
| R06C | 2007 | 212 | 15 | 20 | 35.631 | P | 0.200 | 0.360  |
| SN63 | 2007 | 212 | 15 | 20 | 36.082 | P | 0.200 | -0.346 |
| YO01 | 2007 | 212 | 15 | 20 | 36.126 | P | 0.200 | -0.296 |
| YO02 | 2007 | 212 | 15 | 20 | 36.193 | P | 0.200 | -0.153 |
| YO03 | 2007 | 212 | 15 | 20 | 36.227 | P | 0.200 | -0.141 |
| YO04 | 2007 | 212 | 15 | 20 | 36.259 | P | 0.200 | -0.267 |
| Q07A | 2007 | 212 | 15 | 20 | 36.299 | P | 0.200 | 0.477  |
| YO05 | 2007 | 212 | 15 | 20 | 36.370 | P | 0.200 | -0.242 |
| SN64 | 2007 | 212 | 15 | 20 | 36.477 | P | 0.200 | -0.161 |
| YO06 | 2007 | 212 | 15 | 20 | 36.613 | P | 0.200 | -0.137 |
| P08A | 2007 | 212 | 15 | 20 | 36.637 | P | 0.200 | 0.642  |
| YO07 | 2007 | 212 | 15 | 20 | 36.867 | P | 0.200 | 0.003  |
| BMN  | 2007 | 212 | 15 | 20 | 36.944 | P | 0.200 | 0.497  |
| YO09 | 2007 | 212 | 15 | 20 | 37.051 | P | 0.200 | -0.153 |
| YO10 | 2007 | 212 | 15 | 20 | 37.126 | P | 0.200 | -0.143 |

|      |      |     |    |    |        |   |       |        |
|------|------|-----|----|----|--------|---|-------|--------|
| YO08 | 2007 | 212 | 15 | 20 | 37.140 | P | 0.200 | 0.044  |
| YO11 | 2007 | 212 | 15 | 20 | 37.216 | P | 0.200 | 0.036  |
| U04C | 2007 | 212 | 15 | 20 | 37.298 | P | 0.200 | 0.481  |
| SN55 | 2007 | 212 | 15 | 20 | 37.431 | P | 0.200 | -0.043 |
| O09A | 2007 | 212 | 15 | 20 | 37.867 | P | 0.200 | 0.744  |
| T06C | 2007 | 212 | 15 | 20 | 38.058 | P | 0.200 | -0.339 |
| R07C | 2007 | 212 | 15 | 20 | 38.063 | P | 0.200 | 0.248  |
| V04C | 2007 | 212 | 15 | 20 | 38.656 | P | 0.200 | 0.294  |
| PKD  | 2007 | 212 | 15 | 20 | 38.803 | P | 0.200 | 0.107  |
| Q08A | 2007 | 212 | 15 | 20 | 38.877 | P | 0.200 | 0.019  |
| P09A | 2007 | 212 | 15 | 20 | 39.342 | P | 0.200 | 0.153  |
| R08A | 2007 | 212 | 15 | 20 | 40.029 | P | 0.200 | 0.474  |
| MLAC | 2007 | 212 | 15 | 20 | 40.041 | P | 0.200 | 0.418  |
| PHL  | 2007 | 212 | 15 | 20 | 40.319 | P | 0.200 | 0.356  |
| RCT  | 2007 | 212 | 15 | 20 | 41.012 | P | 0.200 | -0.509 |
| HELL | 2007 | 212 | 15 | 20 | 41.066 | P | 0.200 | -0.382 |
| P10A | 2007 | 212 | 15 | 20 | 41.225 | P | 0.200 | 0.235  |
| V05C | 2007 | 212 | 15 | 20 | 41.230 | P | 0.200 | 0.530  |
| Q09A | 2007 | 212 | 15 | 20 | 41.276 | P | 0.200 | 0.328  |
| S08C | 2007 | 212 | 15 | 20 | 42.326 | P | 0.200 | 0.306  |
| VES  | 2007 | 212 | 15 | 20 | 42.350 | P | 0.200 | -1.065 |
| SMM  | 2007 | 212 | 15 | 20 | 42.521 | P | 0.200 | 0.433  |
| R09A | 2007 | 212 | 15 | 20 | 43.051 | P | 0.200 | 0.029  |
| TIN  | 2007 | 212 | 15 | 20 | 43.072 | P | 0.200 | 0.137  |
| TPH  | 2007 | 212 | 15 | 20 | 43.122 | P | 0.200 | 0.001  |
| Q10A | 2007 | 212 | 15 | 20 | 43.399 | P | 0.200 | 0.131  |
| S09A | 2007 | 212 | 15 | 20 | 44.191 | P | 0.200 | 0.154  |
| MPP  | 2007 | 212 | 15 | 20 | 44.322 | P | 0.200 | 0.421  |
| CWC  | 2007 | 212 | 15 | 20 | 44.853 | P | 0.200 | -0.239 |
| ISA  | 2007 | 212 | 15 | 20 | 44.988 | P | 0.200 | -0.749 |
| R10A | 2007 | 212 | 15 | 20 | 45.539 | P | 0.200 | 0.305  |
| S10A | 2007 | 212 | 15 | 20 | 45.570 | P | 0.200 | 0.238  |
| Q11A | 2007 | 212 | 15 | 20 | 45.616 | P | 0.200 | 0.125  |
| ARV  | 2007 | 212 | 15 | 20 | 45.758 | P | 0.200 | -0.289 |
| GRA  | 2007 | 212 | 15 | 20 | 45.844 | P | 0.200 | 0.445  |
| SCZ2 | 2007 | 212 | 15 | 20 | 46.363 | P | 0.200 | -0.241 |
| R11A | 2007 | 212 | 15 | 20 | 47.321 | P | 0.200 | 0.386  |
| LGU  | 2007 | 212 | 15 | 20 | 47.830 | P | 0.200 | -0.418 |
| MPM  | 2007 | 212 | 15 | 20 | 47.920 | P | 0.200 | 0.000  |
| FUR  | 2007 | 212 | 15 | 20 | 48.447 | P | 0.200 | 0.251  |
| LRL  | 2007 | 212 | 15 | 20 | 48.681 | P | 0.200 | -0.102 |
| S11A | 2007 | 212 | 15 | 20 | 48.702 | P | 0.200 | 0.136  |
| SLA  | 2007 | 212 | 15 | 20 | 48.845 | P | 0.200 | -0.072 |
| TPNV | 2007 | 212 | 15 | 20 | 48.954 | P | 0.200 | -0.118 |
| EDW2 | 2007 | 212 | 15 | 20 | 49.575 | P | 0.200 | 0.273  |
| DEC  | 2007 | 212 | 15 | 20 | 49.694 | P | 0.200 | -0.387 |
| DJJ  | 2007 | 212 | 15 | 20 | 49.721 | P | 0.200 | -0.274 |
| VCS  | 2007 | 212 | 15 | 20 | 50.231 | P | 0.200 | 0.043  |
| U10A | 2007 | 212 | 15 | 20 | 50.551 | P | 0.200 | 0.518  |
| CHF  | 2007 | 212 | 15 | 20 | 50.671 | P | 0.200 | -0.193 |
| MWC  | 2007 | 212 | 15 | 20 | 50.820 | P | 0.200 | -0.404 |
| RPV  | 2007 | 212 | 15 | 20 | 50.960 | P | 0.200 | -0.279 |
| T11A | 2007 | 212 | 15 | 20 | 51.312 | P | 0.200 | 0.228  |
| CIA  | 2007 | 212 | 15 | 20 | 51.504 | P | 0.200 | -0.651 |
| SHO  | 2007 | 212 | 15 | 20 | 51.663 | P | 0.200 | -0.083 |
| GSC  | 2007 | 212 | 15 | 20 | 51.750 | P | 0.200 | -0.110 |
| BFS  | 2007 | 212 | 15 | 20 | 51.750 | P | 0.200 | -0.508 |
| VTV  | 2007 | 212 | 15 | 20 | 52.118 | P | 0.200 | -0.146 |
| RRX  | 2007 | 212 | 15 | 20 | 52.556 | P | 0.200 | 0.220  |
| U11A | 2007 | 212 | 15 | 20 | 53.307 | P | 0.200 | 0.463  |
| SVD  | 2007 | 212 | 15 | 20 | 53.817 | P | 0.200 | -0.536 |
| BBR  | 2007 | 212 | 15 | 20 | 54.076 | P | 0.200 | -0.658 |
| TUQ  | 2007 | 212 | 15 | 20 | 54.198 | P | 0.200 | 0.068  |

|      |      |     |    |         |          |           |         |        |     |       |
|------|------|-----|----|---------|----------|-----------|---------|--------|-----|-------|
| HEC  | 2007 | 212 | 15 | 20      | 54.568   | P         | 0.200   | -0.078 |     |       |
| V11A | 2007 | 212 | 15 | 20      | 54.619   | P         | 0.200   | 0.049  |     |       |
| 2007 | 70   | 7   | 9  | 26.8868 | 43.98800 | 147.89101 | 49.4000 |        | 316 | 0.009 |
| K01A | 2007 | 70  | 7  | 19      | 33.139   | P         | 0.200   | 0.752  |     |       |
| I03A | 2007 | 70  | 7  | 19      | 33.605   | P         | 0.200   | 0.847  |     |       |
| J02A | 2007 | 70  | 7  | 19      | 34.679   | P         | 0.200   | 0.703  |     |       |
| DBO  | 2007 | 70  | 7  | 19      | 36.981   | P         | 0.200   | 0.611  |     |       |
| J03A | 2007 | 70  | 7  | 19      | 37.141   | P         | 0.200   | 0.750  |     |       |
| K02A | 2007 | 70  | 7  | 19      | 37.236   | P         | 0.200   | 0.627  |     |       |
| I04A | 2007 | 70  | 7  | 19      | 37.246   | P         | 0.200   | 0.164  |     |       |
| M01C | 2007 | 70  | 7  | 19      | 38.037   | P         | 0.200   | 0.643  |     |       |
| L02A | 2007 | 70  | 7  | 19      | 39.040   | P         | 0.200   | 0.557  |     |       |
| HUMO | 2007 | 70  | 7  | 19      | 40.032   | P         | 0.200   | 0.646  |     |       |
| J04A | 2007 | 70  | 7  | 19      | 41.005   | P         | 0.200   | 0.338  |     |       |
| JCC  | 2007 | 70  | 7  | 19      | 42.621   | P         | 0.200   | 0.782  |     |       |
| J05A | 2007 | 70  | 7  | 19      | 44.479   | P         | 0.200   | 0.667  |     |       |
| YBH  | 2007 | 70  | 7  | 19      | 44.539   | P         | 0.200   | 0.710  |     |       |
| K04A | 2007 | 70  | 7  | 19      | 44.766   | P         | 0.200   | 0.353  |     |       |
| N02C | 2007 | 70  | 7  | 19      | 45.298   | P         | 0.200   | 0.429  |     |       |
| M02C | 2007 | 70  | 7  | 19      | 45.429   | P         | 0.200   | 0.887  |     |       |
| L04A | 2007 | 70  | 7  | 19      | 45.832   | P         | 0.200   | 0.362  |     |       |
| O01C | 2007 | 70  | 7  | 19      | 46.286   | P         | 0.200   | 0.959  |     |       |
| M04C | 2007 | 70  | 7  | 19      | 47.673   | P         | 0.200   | 0.380  |     |       |
| K05A | 2007 | 70  | 7  | 19      | 48.120   | P         | 0.200   | 0.718  |     |       |
| M03C | 2007 | 70  | 7  | 19      | 48.319   | P         | 0.200   | 0.228  |     |       |
| WDC  | 2007 | 70  | 7  | 19      | 49.082   | P         | 0.200   | 0.179  |     |       |
| O02C | 2007 | 70  | 7  | 19      | 50.200   | P         | 0.200   | 0.536  |     |       |
| P01C | 2007 | 70  | 7  | 19      | 50.261   | P         | 0.200   | 0.270  |     |       |
| L05A | 2007 | 70  | 7  | 19      | 50.867   | P         | 0.200   | 0.519  |     |       |
| M05C | 2007 | 70  | 7  | 19      | 51.971   | P         | 0.200   | 0.227  |     |       |
| GASB | 2007 | 70  | 7  | 19      | 52.695   | P         | 0.200   | 0.615  |     |       |
| HATC | 2007 | 70  | 7  | 19      | 52.887   | P         | 0.200   | 0.333  |     |       |
| HOPS | 2007 | 70  | 7  | 19      | 53.025   | P         | 0.200   | -0.059 |     |       |
| O03C | 2007 | 70  | 7  | 19      | 53.045   | P         | 0.200   | -0.299 |     |       |
| M06C | 2007 | 70  | 7  | 19      | 55.397   | P         | 0.200   | 0.331  |     |       |
| SNG5 | 2007 | 70  | 7  | 19      | 55.838   | P         | 0.200   | -0.663 |     |       |
| O04C | 2007 | 70  | 7  | 19      | 56.348   | P         | 0.200   | 0.257  |     |       |
| ORV  | 2007 | 70  | 7  | 19      | 56.544   | P         | 0.200   | -0.742 |     |       |
| MNRC | 2007 | 70  | 7  | 19      | 56.618   | P         | 0.200   | 0.415  |     |       |
| SUTB | 2007 | 70  | 7  | 19      | 56.618   | P         | 0.200   | -0.738 |     |       |
| ELFS | 2007 | 70  | 7  | 19      | 56.708   | P         | 0.200   | 0.417  |     |       |
| SNG7 | 2007 | 70  | 7  | 19      | 56.731   | P         | 0.200   | 0.099  |     |       |
| L07A | 2007 | 70  | 7  | 19      | 56.821   | P         | 0.200   | 0.369  |     |       |
| CVS  | 2007 | 70  | 7  | 19      | 57.756   | P         | 0.200   | -0.364 |     |       |
| FARB | 2007 | 70  | 7  | 19      | 57.873   | P         | 0.200   | -0.411 |     |       |
| O05C | 2007 | 70  | 7  | 19      | 58.036   | P         | 0.200   | 0.004  |     |       |
| SNF6 | 2007 | 70  | 7  | 19      | 58.093   | P         | 0.200   | -0.449 |     |       |
| SNE4 | 2007 | 70  | 7  | 19      | 58.770   | P         | 0.200   | -0.214 |     |       |
| SNF8 | 2007 | 70  | 7  | 19      | 58.999   | P         | 0.200   | -0.184 |     |       |
| SNF9 | 2007 | 70  | 7  | 19      | 59.053   | P         | 0.200   | -0.278 |     |       |
| SNE5 | 2007 | 70  | 7  | 19      | 59.132   | P         | 0.200   | -0.294 |     |       |
| SNE7 | 2007 | 70  | 7  | 19      | 59.376   | P         | 0.200   | -0.177 |     |       |
| N06A | 2007 | 70  | 7  | 19      | 59.443   | P         | 0.200   | 0.036  |     |       |
| Q03C | 2007 | 70  | 7  | 19      | 59.687   | P         | 0.200   | 0.928  |     |       |
| SNE6 | 2007 | 70  | 7  | 19      | 59.733   | P         | 0.200   | -0.642 |     |       |
| M07A | 2007 | 70  | 7  | 19      | 59.771   | P         | 0.200   | 0.325  |     |       |
| SND4 | 2007 | 70  | 7  | 20      | 0.320    | P         | 0.200   | -0.332 |     |       |
| Q04C | 2007 | 70  | 7  | 20      | 0.367    | P         | 0.200   | -0.116 |     |       |
| BRK  | 2007 | 70  | 7  | 20      | 0.428    | P         | 0.200   | -0.350 |     |       |
| BEK  | 2007 | 70  | 7  | 20      | 0.498    | P         | 0.200   | -0.396 |     |       |
| SND7 | 2007 | 70  | 7  | 20      | 0.536    | P         | 0.200   | -0.308 |     |       |
| SND5 | 2007 | 70  | 7  | 20      | 0.612    | P         | 0.200   | -0.434 |     |       |

|      |      |    |   |    |        |   |       |        |
|------|------|----|---|----|--------|---|-------|--------|
| BKS  | 2007 | 70 | 7 | 20 | 0.671  | P | 0.200 | -0.129 |
| SNE9 | 2007 | 70 | 7 | 20 | 0.704  | P | 0.200 | -0.206 |
| BRIB | 2007 | 70 | 7 | 20 | 0.846  | P | 0.200 | -0.089 |
| O06A | 2007 | 70 | 7 | 20 | 1.728  | P | 0.200 | 0.041  |
| P05C | 2007 | 70 | 7 | 20 | 1.831  | P | 0.200 | -0.225 |
| BDM  | 2007 | 70 | 7 | 20 | 1.927  | P | 0.200 | -0.127 |
| SNC4 | 2007 | 70 | 7 | 20 | 1.953  | P | 0.200 | -0.353 |
| SND8 | 2007 | 70 | 7 | 20 | 1.988  | P | 0.200 | -0.219 |
| SNC5 | 2007 | 70 | 7 | 20 | 2.034  | P | 0.200 | -0.328 |
| SNC3 | 2007 | 70 | 7 | 20 | 2.136  | P | 0.200 | 0.392  |
| JRSC | 2007 | 70 | 7 | 20 | 2.225  | P | 0.200 | -0.505 |
| SND9 | 2007 | 70 | 7 | 20 | 2.548  | P | 0.200 | 0.129  |
| SNC7 | 2007 | 70 | 7 | 20 | 2.713  | P | 0.200 | -0.266 |
| N07B | 2007 | 70 | 7 | 20 | 2.812  | P | 0.200 | 0.146  |
| LAVA | 2007 | 70 | 7 | 20 | 3.218  | P | 0.200 | -0.357 |
| SNB3 | 2007 | 70 | 7 | 20 | 3.320  | P | 0.200 | 0.082  |
| SNC6 | 2007 | 70 | 7 | 20 | 3.396  | P | 0.200 | -0.153 |
| P06A | 2007 | 70 | 7 | 20 | 3.523  | P | 0.200 | 0.264  |
| BNLO | 2007 | 70 | 7 | 20 | 3.523  | P | 0.200 | -0.561 |
| SNC8 | 2007 | 70 | 7 | 20 | 3.772  | P | 0.200 | -0.006 |
| WENL | 2007 | 70 | 7 | 20 | 3.782  | P | 0.200 | -0.058 |
| R04C | 2007 | 70 | 7 | 20 | 4.097  | P | 0.200 | -0.444 |
| SNB7 | 2007 | 70 | 7 | 20 | 4.885  | P | 0.200 | -0.089 |
| SNB6 | 2007 | 70 | 7 | 20 | 5.058  | P | 0.200 | -0.127 |
| SNA4 | 2007 | 70 | 7 | 20 | 5.092  | P | 0.200 | -0.299 |
| SNA3 | 2007 | 70 | 7 | 20 | 5.216  | P | 0.200 | 0.140  |
| MHC  | 2007 | 70 | 7 | 20 | 5.358  | P | 0.200 | -0.223 |
| SNA5 | 2007 | 70 | 7 | 20 | 5.575  | P | 0.200 | -0.334 |
| WCN  | 2007 | 70 | 7 | 20 | 5.628  | P | 0.200 | 0.148  |
| O07A | 2007 | 70 | 7 | 20 | 5.630  | P | 0.200 | 0.154  |
| S04C | 2007 | 70 | 7 | 20 | 5.991  | P | 0.200 | -0.119 |
| SNB9 | 2007 | 70 | 7 | 20 | 6.051  | P | 0.200 | 0.199  |
| N08A | 2007 | 70 | 7 | 20 | 6.061  | P | 0.200 | 0.121  |
| SNA7 | 2007 | 70 | 7 | 20 | 6.291  | P | 0.200 | 0.210  |
| R05C | 2007 | 70 | 7 | 20 | 6.482  | P | 0.200 | -0.147 |
| SN93 | 2007 | 70 | 7 | 20 | 6.795  | P | 0.200 | 0.466  |
| SNA8 | 2007 | 70 | 7 | 20 | 7.053  | P | 0.200 | 0.089  |
| SN95 | 2007 | 70 | 7 | 20 | 7.090  | P | 0.200 | -0.164 |
| SN97 | 2007 | 70 | 7 | 20 | 7.334  | P | 0.200 | 0.102  |
| SN96 | 2007 | 70 | 7 | 20 | 7.617  | P | 0.200 | -0.059 |
| CMB  | 2007 | 70 | 7 | 20 | 7.738  | P | 0.200 | -0.008 |
| SAO  | 2007 | 70 | 7 | 20 | 8.089  | P | 0.200 | -0.381 |
| SN84 | 2007 | 70 | 7 | 20 | 8.115  | P | 0.200 | -0.364 |
| P07A | 2007 | 70 | 7 | 20 | 8.200  | P | 0.200 | 0.247  |
| PACP | 2007 | 70 | 7 | 20 | 8.224  | P | 0.200 | -0.018 |
| O08A | 2007 | 70 | 7 | 20 | 8.229  | P | 0.200 | 0.431  |
| SN98 | 2007 | 70 | 7 | 20 | 8.393  | P | 0.200 | 0.160  |
| SN85 | 2007 | 70 | 7 | 20 | 8.616  | P | 0.200 | -0.175 |
| HAST | 2007 | 70 | 7 | 20 | 9.252  | P | 0.200 | -0.323 |
| SN74 | 2007 | 70 | 7 | 20 | 9.648  | P | 0.200 | -0.323 |
| R06C | 2007 | 70 | 7 | 20 | 9.976  | P | 0.200 | 0.179  |
| S05C | 2007 | 70 | 7 | 20 | 10.045 | P | 0.200 | -0.644 |
| SN75 | 2007 | 70 | 7 | 20 | 10.425 | P | 0.200 | -0.107 |
| S06C | 2007 | 70 | 7 | 20 | 10.440 | P | 0.200 | -0.230 |
| Q07A | 2007 | 70 | 7 | 20 | 10.658 | P | 0.200 | 0.179  |
| P08A | 2007 | 70 | 7 | 20 | 11.089 | P | 0.200 | 0.683  |
| SN63 | 2007 | 70 | 7 | 20 | 11.239 | P | 0.200 | -0.368 |
| T05C | 2007 | 70 | 7 | 20 | 11.449 | P | 0.200 | 0.353  |
| SN64 | 2007 | 70 | 7 | 20 | 11.558 | P | 0.200 | -0.196 |
| SN65 | 2007 | 70 | 7 | 20 | 11.656 | P | 0.200 | -0.128 |
| V03C | 2007 | 70 | 7 | 20 | 12.391 | P | 0.200 | 0.197  |
| O09A | 2007 | 70 | 7 | 20 | 12.425 | P | 0.200 | 0.530  |
| SN55 | 2007 | 70 | 7 | 20 | 12.897 | P | 0.200 | -0.009 |

|      |      |    |   |    |        |   |       |        |
|------|------|----|---|----|--------|---|-------|--------|
| U04C | 2007 | 70 | 7 | 20 | 13.021 | P | 0.200 | 0.211  |
| R07C | 2007 | 70 | 7 | 20 | 13.342 | P | 0.200 | 0.146  |
| T06C | 2007 | 70 | 7 | 20 | 14.268 | P | 0.200 | -0.272 |
| Q08A | 2007 | 70 | 7 | 20 | 14.382 | P | 0.200 | -0.014 |
| P09A | 2007 | 70 | 7 | 20 | 14.832 | P | 0.200 | 0.135  |
| PKD  | 2007 | 70 | 7 | 20 | 15.099 | P | 0.200 | -0.339 |
| V04C | 2007 | 70 | 7 | 20 | 15.551 | P | 0.200 | 0.346  |
| SN34 | 2007 | 70 | 7 | 20 | 15.803 | P | 0.200 | -0.138 |
| R08A | 2007 | 70 | 7 | 20 | 15.840 | P | 0.200 | 0.237  |
| U05C | 2007 | 70 | 7 | 20 | 15.990 | P | 0.200 | 0.577  |
| MLAC | 2007 | 70 | 7 | 20 | 16.295 | P | 0.200 | 0.459  |
| Q09A | 2007 | 70 | 7 | 20 | 17.432 | P | 0.200 | 0.135  |
| PHL  | 2007 | 70 | 7 | 20 | 17.515 | P | 0.200 | 0.118  |
| SN14 | 2007 | 70 | 7 | 20 | 17.888 | P | 0.200 | -0.186 |
| HELL | 2007 | 70 | 7 | 20 | 17.985 | P | 0.200 | -0.689 |
| RCT  | 2007 | 70 | 7 | 20 | 18.550 | P | 0.200 | -0.449 |
| V05C | 2007 | 70 | 7 | 20 | 18.621 | P | 0.200 | 0.484  |
| S08C | 2007 | 70 | 7 | 20 | 19.219 | P | 0.200 | 0.192  |
| R09A | 2007 | 70 | 7 | 20 | 20.023 | P | 0.200 | -0.137 |
| Q10A | 2007 | 70 | 7 | 20 | 20.356 | P | 0.200 | 0.000  |
| SMM  | 2007 | 70 | 7 | 20 | 20.392 | P | 0.200 | 0.258  |
| TIN  | 2007 | 70 | 7 | 20 | 20.509 | P | 0.200 | 0.114  |
| S09A | 2007 | 70 | 7 | 20 | 21.590 | P | 0.200 | -0.061 |
| MPP  | 2007 | 70 | 7 | 20 | 22.859 | P | 0.200 | 0.185  |
| Q11A | 2007 | 70 | 7 | 20 | 22.994 | P | 0.200 | -0.206 |
| S10A | 2007 | 70 | 7 | 20 | 23.163 | P | 0.200 | -0.125 |
| CWC  | 2007 | 70 | 7 | 20 | 23.187 | P | 0.200 | -0.255 |
| ISA  | 2007 | 70 | 7 | 20 | 23.736 | P | 0.200 | -0.982 |
| GRA  | 2007 | 70 | 7 | 20 | 24.045 | P | 0.200 | 0.292  |
| SBC  | 2007 | 70 | 7 | 20 | 24.728 | P | 0.200 | 0.057  |
| ARV  | 2007 | 70 | 7 | 20 | 24.764 | P | 0.200 | -0.640 |
| R11A | 2007 | 70 | 7 | 20 | 25.289 | P | 0.200 | -0.036 |
| SCZ2 | 2007 | 70 | 7 | 20 | 26.412 | P | 0.200 | -0.279 |
| MPM  | 2007 | 70 | 7 | 20 | 27.003 | P | 0.200 | -0.261 |
| S11A | 2007 | 70 | 7 | 20 | 27.694 | P | 0.200 | 0.110  |
| FUR  | 2007 | 70 | 7 | 20 | 27.789 | P | 0.200 | 0.131  |
| OSI  | 2007 | 70 | 7 | 20 | 27.817 | P | 0.200 | -0.185 |
| LGU  | 2007 | 70 | 7 | 20 | 27.974 | P | 0.200 | -0.660 |
| LRL  | 2007 | 70 | 7 | 20 | 28.355 | P | 0.200 | -0.347 |
| TPNV | 2007 | 70 | 7 | 20 | 28.365 | P | 0.200 | -0.118 |
| EDW2 | 2007 | 70 | 7 | 20 | 29.668 | P | 0.200 | -0.015 |
| SNCC | 2007 | 70 | 7 | 20 | 29.966 | P | 0.200 | -0.279 |
| DJJ  | 2007 | 70 | 7 | 20 | 30.289 | P | 0.200 | -0.647 |
| U10A | 2007 | 70 | 7 | 20 | 30.420 | P | 0.200 | 0.426  |
| DEC  | 2007 | 70 | 7 | 20 | 30.480 | P | 0.200 | -0.452 |
| VCS  | 2007 | 70 | 7 | 20 | 30.962 | P | 0.200 | 0.037  |
| T11A | 2007 | 70 | 7 | 20 | 31.140 | P | 0.200 | 0.070  |
| PASC | 2007 | 70 | 7 | 20 | 31.237 | P | 0.200 | -0.506 |
| CHF  | 2007 | 70 | 7 | 20 | 31.617 | P | 0.200 | -0.285 |
| MWC  | 2007 | 70 | 7 | 20 | 31.926 | P | 0.200 | -0.411 |
| USC  | 2007 | 70 | 7 | 20 | 31.945 | P | 0.200 | -0.002 |
| SHO  | 2007 | 70 | 7 | 20 | 32.096 | P | 0.200 | -0.278 |
| RPV  | 2007 | 70 | 7 | 20 | 32.226 | P | 0.200 | -0.422 |
| GSC  | 2007 | 70 | 7 | 20 | 32.445 | P | 0.200 | -0.275 |
| FMP  | 2007 | 70 | 7 | 20 | 32.681 | P | 0.200 | -0.350 |
| BFS  | 2007 | 70 | 7 | 20 | 33.172 | P | 0.200 | -0.532 |
| ADO  | 2007 | 70 | 7 | 20 | 33.307 | P | 0.200 | -0.075 |
| CIA  | 2007 | 70 | 7 | 20 | 33.392 | P | 0.200 | -0.577 |
| VTV  | 2007 | 70 | 7 | 20 | 33.420 | P | 0.200 | -0.181 |
| RRX  | 2007 | 70 | 7 | 20 | 33.555 | P | 0.200 | -0.019 |
| U11A | 2007 | 70 | 7 | 20 | 33.940 | P | 0.200 | 0.314  |
| TUQ  | 2007 | 70 | 7 | 20 | 35.429 | P | 0.200 | -0.166 |
| V11A | 2007 | 70 | 7 | 20 | 35.843 | P | 0.200 | -0.099 |

|     |      |    |   |    |        |   |       |        |
|-----|------|----|---|----|--------|---|-------|--------|
| SVD | 2007 | 70 | 7 | 20 | 35.865 | P | 0.200 | -0.522 |
| SDD | 2007 | 70 | 7 | 20 | 36.129 | P | 0.200 | -0.051 |
| BBR | 2007 | 70 | 7 | 20 | 36.130 | P | 0.200 | -0.559 |
| HEC | 2007 | 70 | 7 | 20 | 36.174 | P | 0.200 | -0.258 |

|      |      |     |   |        |          |            |         |        |       |
|------|------|-----|---|--------|----------|------------|---------|--------|-------|
| 2007 | 228  | 4   | 3 | 4.6908 | 50.24300 | -177.56799 | 14.6000 | 348    | 0.012 |
| J03A | 2007 | 228 | 4 | 10     | 16.325   | P          | 0.200   | 0.854  |       |
| I04A | 2007 | 228 | 4 | 10     | 16.819   | P          | 0.200   | 0.108  |       |
| HUMO | 2007 | 228 | 4 | 10     | 19.476   | P          | 0.200   | 0.693  |       |
| J04A | 2007 | 228 | 4 | 10     | 21.231   | P          | 0.200   | 0.379  |       |
| YBH  | 2007 | 228 | 4 | 10     | 25.165   | P          | 0.200   | 1.097  |       |
| N02C | 2007 | 228 | 4 | 10     | 25.668   | P          | 0.200   | 0.746  |       |
| K04A | 2007 | 228 | 4 | 10     | 25.807   | P          | 0.200   | 0.399  |       |
| J05A | 2007 | 228 | 4 | 10     | 25.856   | P          | 0.200   | 0.712  |       |
| M02C | 2007 | 228 | 4 | 10     | 25.981   | P          | 0.200   | 1.187  |       |
| L04A | 2007 | 228 | 4 | 10     | 26.889   | P          | 0.200   | 0.395  |       |
| M04C | 2007 | 228 | 4 | 10     | 29.060   | P          | 0.200   | 0.499  |       |
| M03C | 2007 | 228 | 4 | 10     | 29.753   | P          | 0.200   | 0.469  |       |
| K05A | 2007 | 228 | 4 | 10     | 30.178   | P          | 0.200   | 0.764  |       |
| WDC  | 2007 | 228 | 4 | 10     | 30.702   | P          | 0.200   | 0.634  |       |
| P01C | 2007 | 228 | 4 | 10     | 31.404   | P          | 0.200   | 0.398  |       |
| O02C | 2007 | 228 | 4 | 10     | 31.606   | P          | 0.200   | 0.848  |       |
| L05A | 2007 | 228 | 4 | 10     | 33.383   | P          | 0.200   | 0.668  |       |
| M05C | 2007 | 228 | 4 | 10     | 34.425   | P          | 0.200   | 0.339  |       |
| GASB | 2007 | 228 | 4 | 10     | 34.633   | P          | 0.200   | 0.955  |       |
| HATC | 2007 | 228 | 4 | 10     | 35.233   | P          | 0.200   | 0.372  |       |
| O03C | 2007 | 228 | 4 | 10     | 35.604   | P          | 0.200   | 0.085  |       |
| M06C | 2007 | 228 | 4 | 10     | 38.786   | P          | 0.200   | 0.400  |       |
| SNG5 | 2007 | 228 | 4 | 10     | 39.320   | P          | 0.200   | -0.191 |       |
| MNRC | 2007 | 228 | 4 | 10     | 39.362   | P          | 0.200   | 0.652  |       |
| MCCM | 2007 | 228 | 4 | 10     | 39.381   | P          | 0.200   | -0.355 |       |
| O04C | 2007 | 228 | 4 | 10     | 39.592   | P          | 0.200   | 0.375  |       |
| SUTB | 2007 | 228 | 4 | 10     | 39.913   | P          | 0.200   | -0.492 |       |
| SNG7 | 2007 | 228 | 4 | 10     | 39.914   | P          | 0.200   | 0.167  |       |
| ORV  | 2007 | 228 | 4 | 10     | 40.032   | P          | 0.200   | -0.380 |       |
| ELFS | 2007 | 228 | 4 | 10     | 40.248   | P          | 0.200   | 0.583  |       |
| CVS  | 2007 | 228 | 4 | 10     | 40.841   | P          | 0.200   | -0.235 |       |
| FARB | 2007 | 228 | 4 | 10     | 41.020   | P          | 0.200   | -0.224 |       |
| L07A | 2007 | 228 | 4 | 10     | 41.067   | P          | 0.200   | 0.305  |       |
| SNF6 | 2007 | 228 | 4 | 10     | 41.886   | P          | 0.200   | -0.228 |       |
| O05C | 2007 | 228 | 4 | 10     | 41.939   | P          | 0.200   | 0.305  |       |
| SNE4 | 2007 | 228 | 4 | 10     | 42.591   | P          | 0.200   | -0.022 |       |
| SNE5 | 2007 | 228 | 4 | 10     | 42.963   | P          | 0.200   | -0.128 |       |
| Q03C | 2007 | 228 | 4 | 10     | 43.098   | P          | 0.200   | 1.062  |       |
| SNF8 | 2007 | 228 | 4 | 10     | 43.109   | P          | 0.200   | 0.054  |       |
| SNF9 | 2007 | 228 | 4 | 10     | 43.449   | P          | 0.200   | 0.039  |       |
| SNE7 | 2007 | 228 | 4 | 10     | 43.595   | P          | 0.200   | 0.067  |       |
| N06A | 2007 | 228 | 4 | 10     | 43.974   | P          | 0.200   | 0.152  |       |
| SNE6 | 2007 | 228 | 4 | 10     | 44.030   | P          | 0.200   | -0.339 |       |
| BRK  | 2007 | 228 | 4 | 10     | 44.119   | P          | 0.200   | -0.289 |       |
| Q04C | 2007 | 228 | 4 | 10     | 44.270   | P          | 0.200   | -0.098 |       |
| BKS  | 2007 | 228 | 4 | 10     | 44.390   | P          | 0.200   | -0.108 |       |
| SND4 | 2007 | 228 | 4 | 10     | 44.514   | P          | 0.200   | -0.081 |       |
| M07A | 2007 | 228 | 4 | 10     | 44.518   | P          | 0.200   | 0.163  |       |
| BRIB | 2007 | 228 | 4 | 10     | 44.674   | P          | 0.200   | -0.032 |       |
| SND7 | 2007 | 228 | 4 | 10     | 44.905   | P          | 0.200   | -0.199 |       |
| BEK  | 2007 | 228 | 4 | 10     | 45.012   | P          | 0.200   | -0.188 |       |
| SND5 | 2007 | 228 | 4 | 10     | 45.022   | P          | 0.200   | -0.174 |       |
| SNE9 | 2007 | 228 | 4 | 10     | 45.369   | P          | 0.200   | 0.049  |       |
| BDM  | 2007 | 228 | 4 | 10     | 46.059   | P          | 0.200   | -0.033 |       |
| JRSC | 2007 | 228 | 4 | 10     | 46.382   | P          | 0.200   | -0.458 |       |
| P05C | 2007 | 228 | 4 | 10     | 46.404   | P          | 0.200   | -0.113 |       |
| SNC3 | 2007 | 228 | 4 | 10     | 46.469   | P          | 0.200   | 0.493  |       |

|      |      |     |   |    |        |   |       |        |
|------|------|-----|---|----|--------|---|-------|--------|
| O06A | 2007 | 228 | 4 | 10 | 46.598 | P | 0.200 | 0.085  |
| SNC4 | 2007 | 228 | 4 | 10 | 46.614 | P | 0.200 | -0.095 |
| SND8 | 2007 | 228 | 4 | 10 | 46.674 | P | 0.200 | -0.214 |
| SNC5 | 2007 | 228 | 4 | 10 | 46.742 | P | 0.200 | -0.134 |
| SND9 | 2007 | 228 | 4 | 10 | 47.375 | P | 0.200 | 0.169  |
| SNC7 | 2007 | 228 | 4 | 10 | 47.596 | P | 0.200 | -0.074 |
| BNLO | 2007 | 228 | 4 | 10 | 48.018 | P | 0.200 | -0.539 |
| SNB3 | 2007 | 228 | 4 | 10 | 48.068 | P | 0.200 | 0.288  |
| LAVA | 2007 | 228 | 4 | 10 | 48.111 | P | 0.200 | -0.176 |
| N07B | 2007 | 228 | 4 | 10 | 48.171 | P | 0.200 | -0.002 |
| WENL | 2007 | 228 | 4 | 10 | 48.344 | P | 0.200 | 0.023  |
| SNC6 | 2007 | 228 | 4 | 10 | 48.357 | P | 0.200 | 0.030  |
| P06A | 2007 | 228 | 4 | 10 | 48.493 | P | 0.200 | 0.147  |
| SNB5 | 2007 | 228 | 4 | 10 | 48.852 | P | 0.200 | -0.131 |
| R04C | 2007 | 228 | 4 | 10 | 49.168 | P | 0.200 | -0.312 |
| SNB7 | 2007 | 228 | 4 | 10 | 50.257 | P | 0.200 | 0.098  |
| MHC  | 2007 | 228 | 4 | 10 | 50.316 | P | 0.200 | -0.104 |
| SNB6 | 2007 | 228 | 4 | 10 | 50.426 | P | 0.200 | 0.048  |
| SNA3 | 2007 | 228 | 4 | 10 | 50.454 | P | 0.200 | 0.295  |
| SNA4 | 2007 | 228 | 4 | 10 | 50.590 | P | 0.200 | 0.003  |
| SNA5 | 2007 | 228 | 4 | 10 | 51.063 | P | 0.200 | -0.127 |
| WCN  | 2007 | 228 | 4 | 10 | 51.151 | P | 0.200 | 0.147  |
| S04C | 2007 | 228 | 4 | 10 | 51.165 | P | 0.200 | 0.010  |
| O07A | 2007 | 228 | 4 | 10 | 51.601 | P | 0.200 | 0.124  |
| SNB9 | 2007 | 228 | 4 | 10 | 51.786 | P | 0.200 | 0.232  |
| SNA7 | 2007 | 228 | 4 | 10 | 51.967 | P | 0.200 | 0.299  |
| SN93 | 2007 | 228 | 4 | 10 | 52.254 | P | 0.200 | 0.498  |
| R05C | 2007 | 228 | 4 | 10 | 52.276 | P | 0.200 | 0.049  |
| N08A | 2007 | 228 | 4 | 10 | 52.442 | P | 0.200 | -0.067 |
| SN97 | 2007 | 228 | 4 | 10 | 53.225 | P | 0.200 | 0.154  |
| SN96 | 2007 | 228 | 4 | 10 | 53.687 | P | 0.200 | 0.228  |
| CMB  | 2007 | 228 | 4 | 10 | 53.810 | P | 0.200 | 0.289  |
| PACP | 2007 | 228 | 4 | 10 | 53.814 | P | 0.200 | -0.050 |
| SAO  | 2007 | 228 | 4 | 10 | 53.880 | P | 0.200 | -0.251 |
| P07A | 2007 | 228 | 4 | 10 | 54.481 | P | 0.200 | 0.152  |
| SN98 | 2007 | 228 | 4 | 10 | 54.729 | P | 0.200 | 0.240  |
| O08A | 2007 | 228 | 4 | 10 | 54.786 | P | 0.200 | 0.100  |
| SN86 | 2007 | 228 | 4 | 10 | 54.976 | P | 0.200 | 0.263  |
| SN87 | 2007 | 228 | 4 | 10 | 55.141 | P | 0.200 | 0.352  |
| HAST | 2007 | 228 | 4 | 10 | 55.297 | P | 0.200 | -0.182 |
| R06C | 2007 | 228 | 4 | 10 | 56.631 | P | 0.200 | 0.339  |
| S05C | 2007 | 228 | 4 | 10 | 56.646 | P | 0.200 | -0.464 |
| S06C | 2007 | 228 | 4 | 10 | 57.143 | P | 0.200 | -0.049 |
| Q07A | 2007 | 228 | 4 | 10 | 57.684 | P | 0.200 | 0.206  |
| P08A | 2007 | 228 | 4 | 10 | 58.084 | P | 0.200 | 0.367  |
| SN63 | 2007 | 228 | 4 | 10 | 58.180 | P | 0.200 | -0.141 |
| YO01 | 2007 | 228 | 4 | 10 | 58.265 | P | 0.200 | -0.006 |
| YO02 | 2007 | 228 | 4 | 10 | 58.339 | P | 0.200 | 0.076  |
| YO03 | 2007 | 228 | 4 | 10 | 58.345 | P | 0.200 | 0.036  |
| YO04 | 2007 | 228 | 4 | 10 | 58.360 | P | 0.200 | 0.012  |
| YO05 | 2007 | 228 | 4 | 10 | 58.426 | P | 0.200 | -0.014 |
| SN64 | 2007 | 228 | 4 | 10 | 58.570 | P | 0.200 | 0.052  |
| YO06 | 2007 | 228 | 4 | 10 | 58.807 | P | 0.200 | 0.026  |
| YO07 | 2007 | 228 | 4 | 10 | 59.214 | P | 0.200 | 0.134  |
| V03C | 2007 | 228 | 4 | 10 | 59.222 | P | 0.200 | 0.356  |
| YO08 | 2007 | 228 | 4 | 10 | 59.528 | P | 0.200 | 0.225  |
| YO09 | 2007 | 228 | 4 | 10 | 59.718 | P | 0.200 | 0.167  |
| YO10 | 2007 | 228 | 4 | 10 | 59.791 | P | 0.200 | 0.126  |
| YO11 | 2007 | 228 | 4 | 10 | 59.907 | P | 0.200 | 0.275  |
| U04C | 2007 | 228 | 4 | 10 | 59.927 | P | 0.200 | 0.270  |
| O09A | 2007 | 228 | 4 | 11 | 0.247  | P | 0.200 | 0.130  |
| SN55 | 2007 | 228 | 4 | 11 | 0.278  | P | 0.200 | 0.208  |
| R07C | 2007 | 228 | 4 | 11 | 0.847  | P | 0.200 | 0.362  |

|      |      |     |   |    |        |   |       |        |
|------|------|-----|---|----|--------|---|-------|--------|
| T06C | 2007 | 228 | 4 | 11 | 1.820  | P | 0.200 | -0.172 |
| Q08A | 2007 | 228 | 4 | 11 | 2.313  | P | 0.200 | -0.179 |
| PKD  | 2007 | 228 | 4 | 11 | 2.753  | P | 0.200 | -0.204 |
| V04C | 2007 | 228 | 4 | 11 | 3.098  | P | 0.200 | 0.403  |
| P09A | 2007 | 228 | 4 | 11 | 3.374  | P | 0.200 | 0.036  |
| U05C | 2007 | 228 | 4 | 11 | 3.644  | P | 0.200 | 0.567  |
| R08A | 2007 | 228 | 4 | 11 | 4.046  | P | 0.200 | 0.110  |
| PHL  | 2007 | 228 | 4 | 11 | 5.720  | P | 0.200 | 0.216  |
| P10A | 2007 | 228 | 4 | 11 | 6.448  | P | 0.200 | -0.033 |
| Q09A | 2007 | 228 | 4 | 11 | 6.528  | P | 0.200 | 0.101  |
| HELL | 2007 | 228 | 4 | 11 | 6.808  | P | 0.200 | -0.490 |
| V05C | 2007 | 228 | 4 | 11 | 7.144  | P | 0.200 | 0.623  |
| RCT  | 2007 | 228 | 4 | 11 | 7.265  | P | 0.200 | -0.469 |
| S08C | 2007 | 228 | 4 | 11 | 8.243  | P | 0.200 | 0.285  |
| SMM  | 2007 | 228 | 4 | 11 | 9.174  | P | 0.200 | 0.231  |
| R09A | 2007 | 228 | 4 | 11 | 9.508  | P | 0.200 | -0.365 |
| TPH  | 2007 | 228 | 4 | 11 | 9.626  | P | 0.200 | -0.309 |
| TIN  | 2007 | 228 | 4 | 11 | 9.798  | P | 0.200 | 0.208  |
| VES  | 2007 | 228 | 4 | 11 | 10.178 | P | 0.200 | -0.751 |
| Q10A | 2007 | 228 | 4 | 11 | 10.302 | P | 0.200 | -0.203 |
| S09A | 2007 | 228 | 4 | 11 | 11.295 | P | 0.200 | -0.272 |
| MPP  | 2007 | 228 | 4 | 11 | 12.298 | P | 0.200 | 0.149  |
| R10A | 2007 | 228 | 4 | 11 | 13.136 | P | 0.200 | -0.406 |
| CWC  | 2007 | 228 | 4 | 11 | 13.264 | P | 0.200 | -0.102 |
| S10A | 2007 | 228 | 4 | 11 | 13.395 | P | 0.200 | -0.432 |
| Q11A | 2007 | 228 | 4 | 11 | 13.779 | P | 0.200 | -0.408 |
| ISA  | 2007 | 228 | 4 | 11 | 14.135 | P | 0.200 | -0.832 |
| GRA  | 2007 | 228 | 4 | 11 | 14.391 | P | 0.200 | 0.272  |
| SBC  | 2007 | 228 | 4 | 11 | 14.813 | P | 0.200 | 0.127  |
| ARV  | 2007 | 228 | 4 | 11 | 14.885 | P | 0.200 | -0.894 |
| R11A | 2007 | 228 | 4 | 11 | 16.273 | P | 0.200 | -0.556 |
| SCZ2 | 2007 | 228 | 4 | 11 | 16.829 | P | 0.200 | -0.512 |
| MPM  | 2007 | 228 | 4 | 11 | 18.049 | P | 0.200 | -0.209 |
| OSI  | 2007 | 228 | 4 | 11 | 18.746 | P | 0.200 | -0.226 |
| LGU  | 2007 | 228 | 4 | 11 | 19.007 | P | 0.200 | -0.732 |
| FUR  | 2007 | 228 | 4 | 11 | 19.019 | P | 0.200 | -0.099 |
| S11A | 2007 | 228 | 4 | 11 | 19.115 | P | 0.200 | -0.281 |
| LRL  | 2007 | 228 | 4 | 11 | 19.423 | P | 0.200 | -0.644 |
| SLA  | 2007 | 228 | 4 | 11 | 19.714 | P | 0.200 | -0.333 |
| TPNV | 2007 | 228 | 4 | 11 | 19.780 | P | 0.200 | -0.465 |
| EDW2 | 2007 | 228 | 4 | 11 | 20.917 | P | 0.200 | -0.367 |
| DJJ  | 2007 | 228 | 4 | 11 | 22.069 | P | 0.200 | -0.724 |
| DEC  | 2007 | 228 | 4 | 11 | 22.141 | P | 0.200 | -0.619 |
| U10A | 2007 | 228 | 4 | 11 | 22.147 | P | 0.200 | -0.001 |
| VCS  | 2007 | 228 | 4 | 11 | 22.629 | P | 0.200 | -0.126 |
| T11A | 2007 | 228 | 4 | 11 | 23.401 | P | 0.200 | -0.500 |
| CHF  | 2007 | 228 | 4 | 11 | 23.749 | P | 0.200 | -0.278 |
| MWC  | 2007 | 228 | 4 | 11 | 23.886 | P | 0.200 | -0.610 |
| RPV  | 2007 | 228 | 4 | 11 | 24.260 | P | 0.200 | -0.663 |
| SHO  | 2007 | 228 | 4 | 11 | 24.511 | P | 0.200 | -0.527 |
| GSC  | 2007 | 228 | 4 | 11 | 24.834 | P | 0.200 | -0.461 |
| FMP  | 2007 | 228 | 4 | 11 | 24.874 | P | 0.200 | -0.643 |
| ADO  | 2007 | 228 | 4 | 11 | 25.701 | P | 0.200 | -0.213 |
| BFS  | 2007 | 228 | 4 | 11 | 25.829 | P | 0.200 | -0.497 |
| CIA  | 2007 | 228 | 4 | 11 | 25.844 | P | 0.200 | -0.772 |
| VTV  | 2007 | 228 | 4 | 11 | 25.977 | P | 0.200 | -0.318 |
| RRX  | 2007 | 228 | 4 | 11 | 26.036 | P | 0.200 | -0.321 |
| U11A | 2007 | 228 | 4 | 11 | 26.635 | P | 0.200 | -0.314 |
| TUQ  | 2007 | 228 | 4 | 11 | 28.555 | P | 0.200 | -0.591 |
| V11A | 2007 | 228 | 4 | 11 | 29.300 | P | 0.200 | -0.392 |
| SVD  | 2007 | 228 | 4 | 11 | 29.414 | P | 0.200 | -0.380 |
| HEC  | 2007 | 228 | 4 | 11 | 29.490 | P | 0.200 | -0.543 |
| BBR  | 2007 | 228 | 4 | 11 | 29.575 | P | 0.200 | -0.548 |



|      |      |     |      |         |          |           |         |     |       |
|------|------|-----|------|---------|----------|-----------|---------|-----|-------|
| 2007 | 197  | 1   | 13   | 22.6430 | 37.53500 | 138.44600 | 12.0000 | 336 | 0.000 |
| TAKO | 2007 | 197 | 1 24 | 34.398  | P        | 0.200     | 0.853   |     |       |
| K01A | 2007 | 197 | 1 24 | 35.936  | P        | 0.200     | 0.632   |     |       |
| I03A | 2007 | 197 | 1 24 | 36.462  | P        | 0.200     | 0.680   |     |       |
| J02A | 2007 | 197 | 1 24 | 37.564  | P        | 0.200     | 0.727   |     |       |
| DBO  | 2007 | 197 | 1 24 | 39.576  | P        | 0.200     | 0.590   |     |       |
| K02A | 2007 | 197 | 1 24 | 39.604  | P        | 0.200     | 0.471   |     |       |
| I04A | 2007 | 197 | 1 24 | 39.698  | P        | 0.200     | 0.008   |     |       |
| J03A | 2007 | 197 | 1 24 | 39.803  | P        | 0.200     | 0.789   |     |       |
| M01C | 2007 | 197 | 1 24 | 40.384  | P        | 0.200     | 0.684   |     |       |
| L02A | 2007 | 197 | 1 24 | 41.401  | P        | 0.200     | 0.634   |     |       |
| HUMO | 2007 | 197 | 1 24 | 42.327  | P        | 0.200     | 0.675   |     |       |
| J04A | 2007 | 197 | 1 24 | 43.087  | P        | 0.200     | 0.166   |     |       |
| JCC  | 2007 | 197 | 1 24 | 44.310  | P        | 0.200     | 0.715   |     |       |
| J05A | 2007 | 197 | 1 24 | 46.355  | P        | 0.200     | 0.615   |     |       |
| YBH  | 2007 | 197 | 1 24 | 46.364  | P        | 0.200     | 0.805   |     |       |
| K04A | 2007 | 197 | 1 24 | 46.510  | P        | 0.200     | 0.298   |     |       |
| N02C | 2007 | 197 | 1 24 | 46.829  | P        | 0.200     | 0.471   |     |       |
| M02C | 2007 | 197 | 1 24 | 46.986  | P        | 0.200     | 0.829   |     |       |
| L04A | 2007 | 197 | 1 24 | 47.424  | P        | 0.200     | 0.308   |     |       |
| O01C | 2007 | 197 | 1 24 | 47.497  | P        | 0.200     | 0.848   |     |       |
| M04C | 2007 | 197 | 1 24 | 49.004  | P        | 0.200     | 0.270   |     |       |
| M03C | 2007 | 197 | 1 24 | 49.451  | P        | 0.200     | 0.053   |     |       |
| K05A | 2007 | 197 | 1 24 | 49.606  | P        | 0.200     | 0.659   |     |       |
| WDC  | 2007 | 197 | 1 24 | 50.213  | P        | 0.200     | 0.216   |     |       |
| P01C | 2007 | 197 | 1 24 | 50.995  | P        | 0.200     | 0.200   |     |       |
| O02C | 2007 | 197 | 1 24 | 51.111  | P        | 0.200     | 0.455   |     |       |
| L05A | 2007 | 197 | 1 24 | 52.005  | P        | 0.200     | 0.448   |     |       |
| M05C | 2007 | 197 | 1 24 | 52.837  | P        | 0.200     | 0.102   |     |       |
| GASB | 2007 | 197 | 1 24 | 53.456  | P        | 0.200     | 0.688   |     |       |
| HATC | 2007 | 197 | 1 24 | 53.496  | P        | 0.200     | 0.115   |     |       |
| M06C | 2007 | 197 | 1 24 | 55.990  | P        | 0.200     | 0.274   |     |       |
| SNG5 | 2007 | 197 | 1 24 | 56.307  | P        | 0.200     | -0.464  |     |       |
| MCCM | 2007 | 197 | 1 24 | 56.613  | P        | 0.200     | -0.322  |     |       |
| O04C | 2007 | 197 | 1 24 | 56.618  | P        | 0.200     | 0.098   |     |       |
| MNRC | 2007 | 197 | 1 24 | 56.768  | P        | 0.200     | 0.377   |     |       |
| SNG7 | 2007 | 197 | 1 24 | 56.774  | P        | 0.200     | -0.233  |     |       |
| SUTB | 2007 | 197 | 1 24 | 56.822  | P        | 0.200     | -0.650  |     |       |
| ORV  | 2007 | 197 | 1 24 | 56.867  | P        | 0.200     | -0.618  |     |       |
| ELFS | 2007 | 197 | 1 24 | 57.049  | P        | 0.200     | 0.311   |     |       |
| L07A | 2007 | 197 | 1 24 | 57.439  | P        | 0.200     | 0.359   |     |       |
| FARB | 2007 | 197 | 1 24 | 57.570  | P        | 0.200     | -0.421  |     |       |
| CVS  | 2007 | 197 | 1 24 | 57.672  | P        | 0.200     | -0.334  |     |       |
| SNF6 | 2007 | 197 | 1 24 | 58.235  | P        | 0.200     | -0.404  |     |       |
| O05C | 2007 | 197 | 1 24 | 58.261  | P        | 0.200     | 0.060   |     |       |
| SNE4 | 2007 | 197 | 1 24 | 58.820  | P        | 0.200     | -0.114  |     |       |
| SNE5 | 2007 | 197 | 1 24 | 59.044  | P        | 0.200     | -0.363  |     |       |
| SNF8 | 2007 | 197 | 1 24 | 59.099  | P        | 0.200     | -0.191  |     |       |
| SNF9 | 2007 | 197 | 1 24 | 59.251  | P        | 0.200     | -0.183  |     |       |
| SNE7 | 2007 | 197 | 1 24 | 59.495  | P        | 0.200     | -0.078  |     |       |
| Q03C | 2007 | 197 | 1 24 | 59.503  | P        | 0.200     | 0.867   |     |       |
| N06A | 2007 | 197 | 1 24 | 59.622  | P        | 0.200     | 0.034   |     |       |
| SNE6 | 2007 | 197 | 1 24 | 59.780  | P        | 0.200     | -0.515  |     |       |
| M07A | 2007 | 197 | 1 24 | 59.970  | P        | 0.200     | 0.278   |     |       |
| BRK  | 2007 | 197 | 1 25 | 0.015   | P        | 0.200     | -0.328  |     |       |
| SND4 | 2007 | 197 | 1 25 | 0.152   | P        | 0.200     | -0.304  |     |       |
| BKS  | 2007 | 197 | 1 25 | 0.251   | P        | 0.200     | -0.098  |     |       |
| Q04C | 2007 | 197 | 1 25 | 0.317   | P        | 0.200     | 0.076   |     |       |
| BEK  | 2007 | 197 | 1 25 | 0.470   | P        | 0.200     | -0.374  |     |       |
| SND5 | 2007 | 197 | 1 25 | 0.491   | P        | 0.200     | -0.343  |     |       |
| SND7 | 2007 | 197 | 1 25 | 0.512   | P        | 0.200     | -0.217  |     |       |
| BRIB | 2007 | 197 | 1 25 | 0.571   | P        | 0.200     | 0.103   |     |       |

|      |      |     |   |    |        |   |       |        |
|------|------|-----|---|----|--------|---|-------|--------|
| SNE9 | 2007 | 197 | 1 | 25 | 0.745  | P | 0.200 | -0.128 |
| BDM  | 2007 | 197 | 1 | 25 | 1.421  | P | 0.200 | -0.095 |
| O06A | 2007 | 197 | 1 | 25 | 1.509  | P | 0.200 | -0.063 |
| JRSC | 2007 | 197 | 1 | 25 | 1.544  | P | 0.200 | -0.477 |
| SNC3 | 2007 | 197 | 1 | 25 | 1.648  | P | 0.200 | 0.289  |
| SNC4 | 2007 | 197 | 1 | 25 | 1.655  | P | 0.200 | -0.262 |
| SNC5 | 2007 | 197 | 1 | 25 | 1.661  | P | 0.200 | -0.338 |
| SND8 | 2007 | 197 | 1 | 25 | 1.750  | P | 0.200 | -0.228 |
| P05C | 2007 | 197 | 1 | 25 | 1.751  | P | 0.200 | -0.033 |
| SND9 | 2007 | 197 | 1 | 25 | 2.272  | P | 0.200 | 0.066  |
| SNC7 | 2007 | 197 | 1 | 25 | 2.459  | P | 0.200 | -0.187 |
| BNLO | 2007 | 197 | 1 | 25 | 2.666  | P | 0.200 | -0.529 |
| N07B | 2007 | 197 | 1 | 25 | 2.737  | P | 0.200 | 0.189  |
| LAVA | 2007 | 197 | 1 | 25 | 2.745  | P | 0.200 | -0.328 |
| SNB3 | 2007 | 197 | 1 | 25 | 2.784  | P | 0.200 | 0.063  |
| SNC6 | 2007 | 197 | 1 | 25 | 2.951  | P | 0.200 | -0.173 |
| WENL | 2007 | 197 | 1 | 25 | 3.004  | P | 0.200 | -0.075 |
| P06A | 2007 | 197 | 1 | 25 | 3.080  | P | 0.200 | 0.162  |
| SNB5 | 2007 | 197 | 1 | 25 | 3.335  | P | 0.200 | -0.206 |
| R04C | 2007 | 197 | 1 | 25 | 3.627  | P | 0.200 | -0.203 |
| SNB7 | 2007 | 197 | 1 | 25 | 4.308  | P | 0.200 | -0.106 |
| SNB6 | 2007 | 197 | 1 | 25 | 4.433  | P | 0.200 | -0.150 |
| SNA4 | 2007 | 197 | 1 | 25 | 4.460  | P | 0.200 | -0.214 |
| SNA3 | 2007 | 197 | 1 | 25 | 4.482  | P | 0.200 | 0.128  |
| MHC  | 2007 | 197 | 1 | 25 | 4.534  | P | 0.200 | -0.109 |
| SNA5 | 2007 | 197 | 1 | 25 | 4.893  | P | 0.200 | -0.318 |
| S04C | 2007 | 197 | 1 | 25 | 4.998  | P | 0.200 | -0.165 |
| WCN  | 2007 | 197 | 1 | 25 | 5.038  | P | 0.200 | 0.139  |
| O07A | 2007 | 197 | 1 | 25 | 5.260  | P | 0.200 | 0.239  |
| SNB9 | 2007 | 197 | 1 | 25 | 5.531  | P | 0.200 | 0.292  |
| SNA7 | 2007 | 197 | 1 | 25 | 5.698  | P | 0.200 | 0.297  |
| N08A | 2007 | 197 | 1 | 25 | 5.825  | P | 0.200 | 0.304  |
| R05C | 2007 | 197 | 1 | 25 | 5.893  | P | 0.200 | 0.040  |
| SN93 | 2007 | 197 | 1 | 25 | 5.950  | P | 0.200 | 0.502  |
| SN97 | 2007 | 197 | 1 | 25 | 6.503  | P | 0.200 | 0.088  |
| CMB  | 2007 | 197 | 1 | 25 | 6.651  | P | 0.200 | -0.078 |
| SN96 | 2007 | 197 | 1 | 25 | 6.844  | P | 0.200 | 0.058  |
| SAO  | 2007 | 197 | 1 | 25 | 6.925  | P | 0.200 | -0.210 |
| PACP | 2007 | 197 | 1 | 25 | 7.040  | P | 0.200 | 0.050  |
| P07A | 2007 | 197 | 1 | 25 | 7.366  | P | 0.200 | 0.157  |
| SN98 | 2007 | 197 | 1 | 25 | 7.429  | P | 0.200 | 0.097  |
| O08A | 2007 | 197 | 1 | 25 | 7.656  | P | 0.200 | 0.523  |
| HAST | 2007 | 197 | 1 | 25 | 7.761  | P | 0.200 | -0.319 |
| SN86 | 2007 | 197 | 1 | 25 | 7.786  | P | 0.200 | 0.118  |
| SN87 | 2007 | 197 | 1 | 25 | 7.942  | P | 0.200 | 0.287  |
| S05C | 2007 | 197 | 1 | 25 | 8.712  | P | 0.200 | -0.571 |
| R06C | 2007 | 197 | 1 | 25 | 8.965  | P | 0.200 | 0.255  |
| S06C | 2007 | 197 | 1 | 25 | 9.129  | P | 0.200 | -0.261 |
| Q07A | 2007 | 197 | 1 | 25 | 9.682  | P | 0.200 | 0.315  |
| SN63 | 2007 | 197 | 1 | 25 | 9.876  | P | 0.200 | -0.342 |
| YO01 | 2007 | 197 | 1 | 25 | 9.914  | P | 0.200 | -0.271 |
| YO02 | 2007 | 197 | 1 | 25 | 9.930  | P | 0.200 | -0.185 |
| YO03 | 2007 | 197 | 1 | 25 | 9.968  | P | 0.200 | -0.170 |
| T05C | 2007 | 197 | 1 | 25 | 9.988  | P | 0.200 | 0.419  |
| P08A | 2007 | 197 | 1 | 25 | 10.036 | P | 0.200 | 0.607  |
| YO04 | 2007 | 197 | 1 | 25 | 10.042 | P | 0.200 | -0.231 |
| YO05 | 2007 | 197 | 1 | 25 | 10.052 | P | 0.200 | -0.313 |
| SN64 | 2007 | 197 | 1 | 25 | 10.216 | P | 0.200 | -0.180 |
| YO06 | 2007 | 197 | 1 | 25 | 10.382 | P | 0.200 | -0.174 |
| V03C | 2007 | 197 | 1 | 25 | 10.633 | P | 0.200 | 0.280  |
| YO07 | 2007 | 197 | 1 | 25 | 10.633 | P | 0.200 | -0.082 |
| YO08 | 2007 | 197 | 1 | 25 | 10.882 | P | 0.200 | -0.065 |
| YO09 | 2007 | 197 | 1 | 25 | 10.964 | P | 0.200 | -0.140 |

|      |      |     |   |    |        |   |       |        |
|------|------|-----|---|----|--------|---|-------|--------|
| YO10 | 2007 | 197 | 1 | 25 | 11.047 | P | 0.200 | -0.124 |
| YO11 | 2007 | 197 | 1 | 25 | 11.191 | P | 0.200 | 0.115  |
| U04C | 2007 | 197 | 1 | 25 | 11.299 | P | 0.200 | 0.293  |
| SN55 | 2007 | 197 | 1 | 25 | 11.399 | P | 0.200 | -0.026 |
| O09A | 2007 | 197 | 1 | 25 | 11.432 | P | 0.200 | 0.629  |
| R07C | 2007 | 197 | 1 | 25 | 11.904 | P | 0.200 | 0.155  |
| T06C | 2007 | 197 | 1 | 25 | 12.329 | P | 0.200 | -0.394 |
| Q08A | 2007 | 197 | 1 | 25 | 12.845 | P | 0.200 | -0.092 |
| PKD  | 2007 | 197 | 1 | 25 | 13.157 | P | 0.200 | -0.166 |
| V04C | 2007 | 197 | 1 | 25 | 13.346 | P | 0.200 | 0.327  |
| P09A | 2007 | 197 | 1 | 25 | 13.458 | P | 0.200 | 0.170  |
| U05C | 2007 | 197 | 1 | 25 | 13.822 | P | 0.200 | 0.468  |
| R08A | 2007 | 197 | 1 | 25 | 14.198 | P | 0.200 | 0.286  |
| MLAC | 2007 | 197 | 1 | 25 | 14.334 | P | 0.200 | 0.286  |
| PHL  | 2007 | 197 | 1 | 25 | 15.117 | P | 0.200 | 0.137  |
| Q09A | 2007 | 197 | 1 | 25 | 15.604 | P | 0.200 | 0.076  |
| HELL | 2007 | 197 | 1 | 25 | 15.871 | P | 0.200 | -0.566 |
| RCT  | 2007 | 197 | 1 | 25 | 16.057 | P | 0.200 | -0.580 |
| V05C | 2007 | 197 | 1 | 25 | 16.162 | P | 0.200 | 0.405  |
| S08C | 2007 | 197 | 1 | 25 | 17.197 | P | 0.200 | 0.269  |
| SMM  | 2007 | 197 | 1 | 25 | 17.600 | P | 0.200 | 0.125  |
| VES  | 2007 | 197 | 1 | 25 | 17.813 | P | 0.200 | -1.115 |
| R09A | 2007 | 197 | 1 | 25 | 17.894 | P | 0.200 | -0.155 |
| TIN  | 2007 | 197 | 1 | 25 | 18.167 | P | 0.200 | 0.071  |
| Q10A | 2007 | 197 | 1 | 25 | 18.233 | P | 0.200 | -0.057 |
| S09A | 2007 | 197 | 1 | 25 | 19.244 | P | 0.200 | -0.071 |
| MPP  | 2007 | 197 | 1 | 25 | 19.759 | P | 0.200 | 0.061  |
| CWC  | 2007 | 197 | 1 | 25 | 20.554 | P | 0.200 | -0.179 |
| R10A | 2007 | 197 | 1 | 25 | 20.680 | P | 0.200 | 0.059  |
| Q11A | 2007 | 197 | 1 | 25 | 20.803 | P | 0.200 | -0.073 |
| ISA  | 2007 | 197 | 1 | 25 | 20.859 | P | 0.200 | -0.856 |
| S10A | 2007 | 197 | 1 | 25 | 20.891 | P | 0.200 | 0.072  |
| GRA  | 2007 | 197 | 1 | 25 | 21.408 | P | 0.200 | 0.332  |
| SBC  | 2007 | 197 | 1 | 25 | 21.435 | P | 0.200 | 0.023  |
| ARV  | 2007 | 197 | 1 | 25 | 21.709 | P | 0.200 | -0.509 |
| SCZ2 | 2007 | 197 | 1 | 25 | 22.631 | P | 0.200 | -0.502 |
| R11A | 2007 | 197 | 1 | 25 | 22.815 | P | 0.200 | 0.107  |
| MPM  | 2007 | 197 | 1 | 25 | 23.896 | P | 0.200 | -0.253 |
| LGU  | 2007 | 197 | 1 | 25 | 24.364 | P | 0.200 | -0.593 |
| OSI  | 2007 | 197 | 1 | 25 | 24.431 | P | 0.200 | -0.069 |
| FUR  | 2007 | 197 | 1 | 25 | 24.581 | P | 0.200 | 0.072  |
| S11A | 2007 | 197 | 1 | 25 | 24.711 | P | 0.200 | 0.034  |
| LRL  | 2007 | 197 | 1 | 25 | 24.944 | P | 0.200 | -0.366 |
| TPNV | 2007 | 197 | 1 | 25 | 25.095 | P | 0.200 | -0.283 |
| SLA  | 2007 | 197 | 1 | 25 | 25.140 | P | 0.200 | -0.210 |
| EDW2 | 2007 | 197 | 1 | 25 | 26.079 | P | 0.200 | 0.024  |
| DEC  | 2007 | 197 | 1 | 25 | 26.449 | P | 0.200 | -0.627 |
| DJJ  | 2007 | 197 | 1 | 25 | 26.515 | P | 0.200 | -0.513 |
| U10A | 2007 | 197 | 1 | 25 | 26.891 | P | 0.200 | 0.270  |
| VCS  | 2007 | 197 | 1 | 25 | 26.939 | P | 0.200 | -0.191 |
| PASC | 2007 | 197 | 1 | 25 | 27.207 | P | 0.200 | -0.575 |
| CHF  | 2007 | 197 | 1 | 25 | 27.775 | P | 0.200 | -0.193 |
| MWC  | 2007 | 197 | 1 | 25 | 27.832 | P | 0.200 | -0.542 |
| T11A | 2007 | 197 | 1 | 25 | 27.847 | P | 0.200 | 0.116  |
| USC  | 2007 | 197 | 1 | 25 | 27.862 | P | 0.200 | -0.073 |
| RPV  | 2007 | 197 | 1 | 25 | 28.073 | P | 0.200 | -0.455 |
| SHO  | 2007 | 197 | 1 | 25 | 28.513 | P | 0.200 | -0.191 |
| FMP  | 2007 | 197 | 1 | 25 | 28.522 | P | 0.200 | -0.320 |
| GSC  | 2007 | 197 | 1 | 25 | 28.671 | P | 0.200 | -0.243 |
| CIA  | 2007 | 197 | 1 | 25 | 29.042 | P | 0.200 | -0.616 |
| BFS  | 2007 | 197 | 1 | 25 | 29.047 | P | 0.200 | -0.551 |
| ADO  | 2007 | 197 | 1 | 25 | 29.181 | P | 0.200 | -0.203 |
| VTV  | 2007 | 197 | 1 | 25 | 29.213 | P | 0.200 | -0.344 |

|      |      |     |   |    |        |   |       |        |
|------|------|-----|---|----|--------|---|-------|--------|
| RRX  | 2007 | 197 | 1 | 25 | 29.558 | P | 0.200 | -0.030 |
| U11A | 2007 | 197 | 1 | 25 | 30.317 | P | 0.200 | 0.411  |
| TUQ  | 2007 | 197 | 1 | 25 | 31.360 | P | 0.200 | -0.174 |
| SVD  | 2007 | 197 | 1 | 25 | 31.515 | P | 0.200 | -0.505 |
| BBR  | 2007 | 197 | 1 | 25 | 31.607 | P | 0.200 | -0.759 |
| HEC  | 2007 | 197 | 1 | 25 | 31.914 | P | 0.200 | -0.296 |
| V11A | 2007 | 197 | 1 | 25 | 31.917 | P | 0.200 | -0.025 |

|      |     |    |    |         |          |           |          |     |       |
|------|-----|----|----|---------|----------|-----------|----------|-----|-------|
| 2007 | 197 | 14 | 17 | 37.8112 | 36.80800 | 134.85001 | 350.4000 | 337 | 0.000 |
|------|-----|----|----|---------|----------|-----------|----------|-----|-------|

|      |      |     |    |    |        |   |       |        |
|------|------|-----|----|----|--------|---|-------|--------|
| TAKO | 2007 | 197 | 14 | 28 | 28.271 | P | 0.200 | 0.825  |
| K01A | 2007 | 197 | 14 | 28 | 29.907 | P | 0.200 | 0.664  |
| I03A | 2007 | 197 | 14 | 28 | 30.200 | P | 0.200 | 0.703  |
| J02A | 2007 | 197 | 14 | 28 | 31.194 | P | 0.200 | 0.596  |
| I04A | 2007 | 197 | 14 | 28 | 33.115 | P | 0.200 | -0.057 |
| DBO  | 2007 | 197 | 14 | 28 | 33.162 | P | 0.200 | 0.508  |
| K02A | 2007 | 197 | 14 | 28 | 33.330 | P | 0.200 | 0.501  |
| J03A | 2007 | 197 | 14 | 28 | 33.333 | P | 0.200 | 0.710  |
| M01C | 2007 | 197 | 14 | 28 | 34.213 | P | 0.200 | 0.707  |
| L02A | 2007 | 197 | 14 | 28 | 34.969 | P | 0.200 | 0.498  |
| HUMO | 2007 | 197 | 14 | 28 | 35.912 | P | 0.200 | 0.695  |
| J04A | 2007 | 197 | 14 | 28 | 36.451 | P | 0.200 | 0.150  |
| JCC  | 2007 | 197 | 14 | 28 | 38.048 | P | 0.200 | 0.743  |
| J05A | 2007 | 197 | 14 | 28 | 39.408 | P | 0.200 | 0.492  |
| YBH  | 2007 | 197 | 14 | 28 | 39.685 | P | 0.200 | 0.695  |
| K04A | 2007 | 197 | 14 | 28 | 39.795 | P | 0.200 | 0.327  |
| N02C | 2007 | 197 | 14 | 28 | 40.236 | P | 0.200 | 0.344  |
| M02C | 2007 | 197 | 14 | 28 | 40.470 | P | 0.200 | 0.867  |
| L04A | 2007 | 197 | 14 | 28 | 40.720 | P | 0.200 | 0.347  |
| O01C | 2007 | 197 | 14 | 28 | 41.034 | P | 0.200 | 0.771  |
| M04C | 2007 | 197 | 14 | 28 | 42.213 | P | 0.200 | 0.250  |
| K05A | 2007 | 197 | 14 | 28 | 42.593 | P | 0.200 | 0.593  |
| M03C | 2007 | 197 | 14 | 28 | 42.845 | P | 0.200 | 0.173  |
| WDC  | 2007 | 197 | 14 | 28 | 43.512 | P | 0.200 | 0.193  |
| P01C | 2007 | 197 | 14 | 28 | 44.459 | P | 0.200 | 0.219  |
| O02C | 2007 | 197 | 14 | 28 | 44.542 | P | 0.200 | 0.522  |
| L05A | 2007 | 197 | 14 | 28 | 44.884 | P | 0.200 | 0.316  |
| M05C | 2007 | 197 | 14 | 28 | 45.845 | P | 0.200 | 0.060  |
| HATC | 2007 | 197 | 14 | 28 | 46.593 | P | 0.200 | 0.135  |
| O03C | 2007 | 197 | 14 | 28 | 46.768 | P | 0.200 | -0.349 |
| GASB | 2007 | 197 | 14 | 28 | 46.778 | P | 0.200 | 0.708  |
| M06C | 2007 | 197 | 14 | 28 | 48.822 | P | 0.200 | 0.259  |
| SNG5 | 2007 | 197 | 14 | 28 | 49.136 | P | 0.200 | -0.630 |
| O04C | 2007 | 197 | 14 | 28 | 49.685 | P | 0.200 | 0.234  |
| ORV  | 2007 | 197 | 14 | 28 | 49.776 | P | 0.200 | -0.703 |
| MCCM | 2007 | 197 | 14 | 28 | 49.801 | P | 0.200 | -0.338 |
| SUTB | 2007 | 197 | 14 | 28 | 49.826 | P | 0.200 | -0.682 |
| SNG7 | 2007 | 197 | 14 | 28 | 49.845 | P | 0.200 | -0.114 |
| ELFS | 2007 | 197 | 14 | 28 | 49.999 | P | 0.200 | 0.400  |
| MNRC | 2007 | 197 | 14 | 28 | 50.058 | P | 0.200 | 0.496  |
| L07A | 2007 | 197 | 14 | 28 | 50.149 | P | 0.200 | 0.442  |
| FARB | 2007 | 197 | 14 | 28 | 50.799 | P | 0.200 | -0.397 |
| CVS  | 2007 | 197 | 14 | 28 | 50.820 | P | 0.200 | -0.326 |
| O05C | 2007 | 197 | 14 | 28 | 50.957 | P | 0.200 | -0.111 |
| SNF6 | 2007 | 197 | 14 | 28 | 51.002 | P | 0.200 | -0.537 |
| SNE4 | 2007 | 197 | 14 | 28 | 51.765 | P | 0.200 | -0.101 |
| SNF9 | 2007 | 197 | 14 | 28 | 51.935 | P | 0.200 | -0.264 |
| SNF8 | 2007 | 197 | 14 | 28 | 51.980 | P | 0.200 | -0.130 |
| SNE5 | 2007 | 197 | 14 | 28 | 52.004 | P | 0.200 | -0.304 |
| SNE7 | 2007 | 197 | 14 | 28 | 52.228 | P | 0.200 | -0.163 |
| N06A | 2007 | 197 | 14 | 28 | 52.311 | P | 0.200 | 0.054  |
| SNE6 | 2007 | 197 | 14 | 28 | 52.419 | P | 0.200 | -0.710 |
| Q03C | 2007 | 197 | 14 | 28 | 52.564 | P | 0.200 | 0.885  |
| M07A | 2007 | 197 | 14 | 28 | 52.694 | P | 0.200 | 0.455  |

|      |      |     |    |    |        |   |       |        |
|------|------|-----|----|----|--------|---|-------|--------|
| SND4 | 2007 | 197 | 14 | 28 | 52.985 | P | 0.200 | -0.349 |
| BRK  | 2007 | 197 | 14 | 28 | 53.072 | P | 0.200 | -0.324 |
| SND5 | 2007 | 197 | 14 | 28 | 53.177 | P | 0.200 | -0.470 |
| Q04C | 2007 | 197 | 14 | 28 | 53.185 | P | 0.200 | 0.044  |
| SND7 | 2007 | 197 | 14 | 28 | 53.196 | P | 0.200 | -0.291 |
| BEK  | 2007 | 197 | 14 | 28 | 53.220 | P | 0.200 | -0.365 |
| BKS  | 2007 | 197 | 14 | 28 | 53.302 | P | 0.200 | -0.082 |
| BRIB | 2007 | 197 | 14 | 28 | 53.454 | P | 0.200 | -0.031 |
| SNE9 | 2007 | 197 | 14 | 28 | 53.465 | P | 0.200 | -0.121 |
| O06A | 2007 | 197 | 14 | 28 | 54.251 | P | 0.200 | 0.072  |
| P05C | 2007 | 197 | 14 | 28 | 54.266 | P | 0.200 | -0.254 |
| SNC4 | 2007 | 197 | 14 | 28 | 54.417 | P | 0.200 | -0.279 |
| BDM  | 2007 | 197 | 14 | 28 | 54.434 | P | 0.200 | -0.028 |
| SNC5 | 2007 | 197 | 14 | 28 | 54.439 | P | 0.200 | -0.308 |
| JRSC | 2007 | 197 | 14 | 28 | 54.452 | P | 0.200 | -0.557 |
| SND8 | 2007 | 197 | 14 | 28 | 54.498 | P | 0.200 | -0.160 |
| SNC3 | 2007 | 197 | 14 | 28 | 54.609 | P | 0.200 | 0.408  |
| SND9 | 2007 | 197 | 14 | 28 | 54.981 | P | 0.200 | 0.133  |
| SNC7 | 2007 | 197 | 14 | 28 | 55.070 | P | 0.200 | -0.271 |
| N07B | 2007 | 197 | 14 | 28 | 55.215 | P | 0.200 | 0.213  |
| LAVA | 2007 | 197 | 14 | 28 | 55.396 | P | 0.200 | -0.409 |
| SNB3 | 2007 | 197 | 14 | 28 | 55.481 | P | 0.200 | -0.026 |
| BNLO | 2007 | 197 | 14 | 28 | 55.632 | P | 0.200 | -0.505 |
| SNC6 | 2007 | 197 | 14 | 28 | 55.662 | P | 0.200 | -0.148 |
| P06A | 2007 | 197 | 14 | 28 | 55.799 | P | 0.200 | 0.281  |
| SNB5 | 2007 | 197 | 14 | 28 | 55.894 | P | 0.200 | -0.326 |
| WENL | 2007 | 197 | 14 | 28 | 55.910 | P | 0.200 | -0.048 |
| R04C | 2007 | 197 | 14 | 28 | 56.183 | P | 0.200 | -0.368 |
| SNB7 | 2007 | 197 | 14 | 28 | 56.988 | P | 0.200 | -0.026 |
| SNB6 | 2007 | 197 | 14 | 28 | 57.026 | P | 0.200 | -0.179 |
| SNA4 | 2007 | 197 | 14 | 28 | 57.087 | P | 0.200 | -0.229 |
| SNA3 | 2007 | 197 | 14 | 28 | 57.143 | P | 0.200 | 0.111  |
| MHC  | 2007 | 197 | 14 | 28 | 57.335 | P | 0.200 | -0.142 |
| SNA5 | 2007 | 197 | 14 | 28 | 57.480 | P | 0.200 | -0.344 |
| WCN  | 2007 | 197 | 14 | 28 | 57.590 | P | 0.200 | 0.170  |
| O07A | 2007 | 197 | 14 | 28 | 57.616 | P | 0.200 | 0.221  |
| S04C | 2007 | 197 | 14 | 28 | 57.734 | P | 0.200 | -0.194 |
| SNB9 | 2007 | 197 | 14 | 28 | 57.947 | P | 0.200 | 0.223  |
| N08A | 2007 | 197 | 14 | 28 | 58.047 | P | 0.200 | 0.283  |
| SNA7 | 2007 | 197 | 14 | 28 | 58.209 | P | 0.200 | 0.274  |
| R05C | 2007 | 197 | 14 | 28 | 58.372 | P | 0.200 | -0.026 |
| SN93 | 2007 | 197 | 14 | 28 | 58.514 | P | 0.200 | 0.445  |
| SN97 | 2007 | 197 | 14 | 28 | 59.075 | P | 0.200 | 0.173  |
| CMB  | 2007 | 197 | 14 | 28 | 59.199 | P | 0.200 | -0.087 |
| SN96 | 2007 | 197 | 14 | 28 | 59.346 | P | 0.200 | 0.036  |
| SAO  | 2007 | 197 | 14 | 28 | 59.570 | P | 0.200 | -0.279 |
| PACP | 2007 | 197 | 14 | 28 | 59.769 | P | 0.200 | 0.094  |
| P07A | 2007 | 197 | 14 | 28 | 59.773 | P | 0.200 | 0.234  |
| O08A | 2007 | 197 | 14 | 28 | 59.894 | P | 0.200 | 0.568  |
| SN98 | 2007 | 197 | 14 | 28 | 59.913 | P | 0.200 | 0.188  |
| SN86 | 2007 | 197 | 14 | 29 | 0.279  | P | 0.200 | 0.159  |
| SN87 | 2007 | 197 | 14 | 29 | 0.453  | P | 0.200 | 0.375  |
| HAST | 2007 | 197 | 14 | 29 | 0.496  | P | 0.200 | -0.283 |
| R06C | 2007 | 197 | 14 | 29 | 1.323  | P | 0.200 | 0.245  |
| S05C | 2007 | 197 | 14 | 29 | 1.331  | P | 0.200 | -0.438 |
| S06C | 2007 | 197 | 14 | 29 | 1.527  | P | 0.200 | -0.283 |
| Q07A | 2007 | 197 | 14 | 29 | 1.816  | P | 0.200 | 0.209  |
| P08A | 2007 | 197 | 14 | 29 | 2.255  | P | 0.200 | 0.689  |
| YO01 | 2007 | 197 | 14 | 29 | 2.283  | P | 0.200 | -0.294 |
| SN63 | 2007 | 197 | 14 | 29 | 2.299  | P | 0.200 | -0.307 |
| YO03 | 2007 | 197 | 14 | 29 | 2.328  | P | 0.200 | -0.191 |
| YO02 | 2007 | 197 | 14 | 29 | 2.345  | P | 0.200 | -0.156 |
| YO04 | 2007 | 197 | 14 | 29 | 2.399  | P | 0.200 | -0.255 |

|      |      |     |    |    |        |   |       |        |
|------|------|-----|----|----|--------|---|-------|--------|
| T05C | 2007 | 197 | 14 | 29 | 2.450  | P | 0.200 | 0.342  |
| YO05 | 2007 | 197 | 14 | 29 | 2.456  | P | 0.200 | -0.285 |
| SN64 | 2007 | 197 | 14 | 29 | 2.561  | P | 0.200 | -0.206 |
| YO06 | 2007 | 197 | 14 | 29 | 2.768  | P | 0.200 | -0.145 |
| YO07 | 2007 | 197 | 14 | 29 | 3.057  | P | 0.200 | 0.000  |
| YO08 | 2007 | 197 | 14 | 29 | 3.197  | P | 0.200 | -0.094 |
| V03C | 2007 | 197 | 14 | 29 | 3.200  | P | 0.200 | 0.262  |
| YO09 | 2007 | 197 | 14 | 29 | 3.318  | P | 0.200 | -0.111 |
| O09A | 2007 | 197 | 14 | 29 | 3.422  | P | 0.200 | 0.669  |
| YO10 | 2007 | 197 | 14 | 29 | 3.440  | P | 0.200 | -0.046 |
| YO11 | 2007 | 197 | 14 | 29 | 3.477  | P | 0.200 | 0.090  |
| SN55 | 2007 | 197 | 14 | 29 | 3.717  | P | 0.200 | -0.002 |
| U04C | 2007 | 197 | 14 | 29 | 3.736  | P | 0.200 | 0.227  |
| R07C | 2007 | 197 | 14 | 29 | 4.170  | P | 0.200 | 0.170  |
| T06C | 2007 | 197 | 14 | 29 | 4.658  | P | 0.200 | -0.376 |
| Q08A | 2007 | 197 | 14 | 29 | 4.904  | P | 0.200 | -0.072 |
| P09A | 2007 | 197 | 14 | 29 | 5.382  | P | 0.200 | 0.203  |
| PKD  | 2007 | 197 | 14 | 29 | 5.489  | P | 0.200 | -0.238 |
| V04C | 2007 | 197 | 14 | 29 | 5.779  | P | 0.200 | 0.302  |
| U05C | 2007 | 197 | 14 | 29 | 6.187  | P | 0.200 | 0.507  |
| R08A | 2007 | 197 | 14 | 29 | 6.203  | P | 0.200 | 0.272  |
| MLAC | 2007 | 197 | 14 | 29 | 6.553  | P | 0.200 | 0.370  |
| PHL  | 2007 | 197 | 14 | 29 | 7.393  | P | 0.200 | 0.070  |
| P10A | 2007 | 197 | 14 | 29 | 7.457  | P | 0.200 | 0.294  |
| Q09A | 2007 | 197 | 14 | 29 | 7.474  | P | 0.200 | 0.129  |
| HELL | 2007 | 197 | 14 | 29 | 7.843  | P | 0.200 | -0.664 |
| RCT  | 2007 | 197 | 14 | 29 | 8.196  | P | 0.200 | -0.542 |
| V05C | 2007 | 197 | 14 | 29 | 8.424  | P | 0.200 | 0.444  |
| S08C | 2007 | 197 | 14 | 29 | 9.186  | P | 0.200 | 0.316  |
| R09A | 2007 | 197 | 14 | 29 | 9.780  | P | 0.200 | -0.004 |
| SMM  | 2007 | 197 | 14 | 29 | 9.877  | P | 0.200 | 0.213  |
| VES  | 2007 | 197 | 14 | 29 | 9.914  | P | 0.200 | -1.037 |
| Q10A | 2007 | 197 | 14 | 29 | 10.008 | P | 0.200 | 0.095  |
| TIN  | 2007 | 197 | 14 | 29 | 10.127 | P | 0.200 | 0.107  |
| S09A | 2007 | 197 | 14 | 29 | 11.168 | P | 0.200 | 0.121  |
| MPP  | 2007 | 197 | 14 | 29 | 11.942 | P | 0.200 | 0.144  |
| CWC  | 2007 | 197 | 14 | 29 | 12.263 | P | 0.200 | -0.313 |
| R10A | 2007 | 197 | 14 | 29 | 12.330 | P | 0.200 | 0.132  |
| Q11A | 2007 | 197 | 14 | 29 | 12.346 | P | 0.200 | 0.000  |
| S10A | 2007 | 197 | 14 | 29 | 12.477 | P | 0.200 | 0.060  |
| ISA  | 2007 | 197 | 14 | 29 | 12.536 | P | 0.200 | -1.022 |
| GRA  | 2007 | 197 | 14 | 29 | 13.095 | P | 0.200 | 0.319  |
| ARV  | 2007 | 197 | 14 | 29 | 13.467 | P | 0.200 | -0.619 |
| SBC  | 2007 | 197 | 14 | 29 | 13.493 | P | 0.200 | 0.037  |
| R11A | 2007 | 197 | 14 | 29 | 14.343 | P | 0.200 | 0.251  |
| SCZ2 | 2007 | 197 | 14 | 29 | 14.768 | P | 0.200 | -0.310 |
| MPM  | 2007 | 197 | 14 | 29 | 15.516 | P | 0.200 | -0.269 |
| LGU  | 2007 | 197 | 14 | 29 | 16.018 | P | 0.200 | -0.773 |
| OSI  | 2007 | 197 | 14 | 29 | 16.105 | P | 0.200 | -0.191 |
| S11A | 2007 | 197 | 14 | 29 | 16.258 | P | 0.200 | 0.221  |
| FUR  | 2007 | 197 | 14 | 29 | 16.286 | P | 0.200 | 0.263  |
| LRL  | 2007 | 197 | 14 | 29 | 16.599 | P | 0.200 | -0.327 |
| TPNV | 2007 | 197 | 14 | 29 | 16.697 | P | 0.200 | -0.091 |
| SLA  | 2007 | 197 | 14 | 29 | 16.739 | P | 0.200 | -0.186 |
| EDW2 | 2007 | 197 | 14 | 29 | 17.597 | P | 0.200 | -0.091 |
| DJJ  | 2007 | 197 | 14 | 29 | 18.012 | P | 0.200 | -0.684 |
| DEC  | 2007 | 197 | 14 | 29 | 18.133 | P | 0.200 | -0.590 |
| U10A | 2007 | 197 | 14 | 29 | 18.508 | P | 0.200 | 0.504  |
| VCS  | 2007 | 197 | 14 | 29 | 18.593 | P | 0.200 | -0.159 |
| PASC | 2007 | 197 | 14 | 29 | 18.793 | P | 0.200 | -0.593 |
| T11A | 2007 | 197 | 14 | 29 | 19.072 | P | 0.200 | 0.156  |
| CHF  | 2007 | 197 | 14 | 29 | 19.139 | P | 0.200 | -0.401 |
| MWC  | 2007 | 197 | 14 | 29 | 19.341 | P | 0.200 | -0.610 |

|      |      |     |    |    |        |   |       |        |
|------|------|-----|----|----|--------|---|-------|--------|
| USC  | 2007 | 197 | 14 | 29 | 19.456 | P | 0.200 | -0.088 |
| RPV  | 2007 | 197 | 14 | 29 | 19.615 | P | 0.200 | -0.530 |
| SHO  | 2007 | 197 | 14 | 29 | 19.859 | P | 0.200 | -0.149 |
| FMP  | 2007 | 197 | 14 | 29 | 19.982 | P | 0.200 | -0.435 |
| GSC  | 2007 | 197 | 14 | 29 | 20.134 | P | 0.200 | -0.166 |
| BFS  | 2007 | 197 | 14 | 29 | 20.456 | P | 0.200 | -0.613 |
| CIA  | 2007 | 197 | 14 | 29 | 20.546 | P | 0.200 | -0.695 |
| ADO  | 2007 | 197 | 14 | 29 | 20.719 | P | 0.200 | -0.128 |
| VTV  | 2007 | 197 | 14 | 29 | 20.775 | P | 0.200 | -0.208 |
| RRX  | 2007 | 197 | 14 | 29 | 20.972 | P | 0.200 | 0.004  |
| U11A | 2007 | 197 | 14 | 29 | 21.545 | P | 0.200 | 0.497  |
| SVD  | 2007 | 197 | 14 | 29 | 22.516 | P | 0.200 | -0.831 |
| TUQ  | 2007 | 197 | 14 | 29 | 22.765 | P | 0.200 | 0.065  |
| BBR  | 2007 | 197 | 14 | 29 | 22.881 | P | 0.200 | -0.787 |
| V11A | 2007 | 197 | 14 | 29 | 22.993 | P | 0.200 | -0.045 |
| HEC  | 2007 | 197 | 14 | 29 | 23.254 | P | 0.200 | -0.170 |

|      |     |    |    |         |          |           |         |     |       |
|------|-----|----|----|---------|----------|-----------|---------|-----|-------|
| 1988 | 188 | 15 | 54 | 23.1593 | 41.77200 | 144.32600 | 44.0000 | 408 | 0.001 |
|------|-----|----|----|---------|----------|-----------|---------|-----|-------|

|     |      |     |    |   |        |   |       |        |
|-----|------|-----|----|---|--------|---|-------|--------|
| jhn | 1988 | 188 | 16 | 5 | 40.700 | P | 0.200 | -0.418 |
| ndl | 1988 | 188 | 16 | 5 | 40.700 | P | 0.200 | -0.127 |
| cha | 1988 | 188 | 16 | 5 | 40.000 | P | 0.200 | 0.078  |
| cou | 1988 | 188 | 16 | 5 | 40.850 | P | 0.200 | 0.140  |
| jun | 1988 | 188 | 16 | 5 | 39.670 | P | 0.200 | 0.148  |
| twr | 1988 | 188 | 16 | 5 | 40.350 | P | 0.200 | 0.030  |
| CLC | 1988 | 188 | 16 | 5 | 45.280 | P | 0.200 | 0.026  |
| GSC | 1988 | 188 | 16 | 5 | 50.200 | P | 0.200 | 0.164  |
| WMF | 1988 | 188 | 16 | 5 | 43.420 | P | 0.200 | 0.352  |
| WSH | 1988 | 188 | 16 | 5 | 46.300 | P | 0.200 | 0.145  |
| XMS | 1988 | 188 | 16 | 5 | 47.400 | P | 0.200 | 0.310  |
| BMT | 1988 | 188 | 16 | 5 | 44.100 | P | 0.200 | 0.145  |
| CAL | 1988 | 188 | 16 | 5 | 46.730 | P | 0.200 | 0.303  |
| FLS | 1988 | 188 | 16 | 5 | 50.670 | P | 0.200 | 0.292  |
| HOD | 1988 | 188 | 16 | 5 | 50.330 | P | 0.200 | 0.174  |
| LRM | 1988 | 188 | 16 | 5 | 46.110 | P | 0.200 | -0.027 |
| SRT | 1988 | 188 | 16 | 5 | 45.260 | P | 0.200 | 0.139  |
| TJR | 1988 | 188 | 16 | 5 | 43.410 | P | 0.200 | -0.378 |
| TOW | 1988 | 188 | 16 | 5 | 44.880 | P | 0.200 | 0.273  |
| WCH | 1988 | 188 | 16 | 5 | 43.260 | P | 0.200 | -0.142 |
| WCS | 1988 | 188 | 16 | 5 | 44.090 | P | 0.200 | 0.254  |
| WHS | 1988 | 188 | 16 | 5 | 43.780 | P | 0.200 | 0.188  |
| WHV | 1988 | 188 | 16 | 5 | 42.110 | P | 0.200 | -0.778 |
| WJP | 1988 | 188 | 16 | 5 | 42.810 | P | 0.200 | -0.498 |
| WOF | 1988 | 188 | 16 | 5 | 41.290 | P | 0.200 | -0.797 |
| WRC | 1988 | 188 | 16 | 5 | 44.650 | P | 0.200 | 0.151  |
| WSC | 1988 | 188 | 16 | 5 | 44.220 | P | 0.200 | -0.326 |
| WVP | 1988 | 188 | 16 | 5 | 44.120 | P | 0.200 | 0.179  |

|      |     |    |   |         |          |           |         |     |       |
|------|-----|----|---|---------|----------|-----------|---------|-----|-------|
| 1988 | 212 | 21 | 7 | 22.5774 | 44.77900 | 149.85400 | 62.0000 | 419 | 0.000 |
|------|-----|----|---|---------|----------|-----------|---------|-----|-------|

|     |      |     |    |    |        |   |       |        |
|-----|------|-----|----|----|--------|---|-------|--------|
| arc | 1988 | 212 | 21 | 18 | 8.320  | P | 0.200 | 0.032  |
| bmd | 1988 | 212 | 21 | 18 | 8.670  | P | 0.200 | -0.204 |
| jhn | 1988 | 212 | 21 | 18 | 7.300  | P | 0.200 | -0.255 |
| mnk | 1988 | 212 | 21 | 18 | 5.710  | P | 0.200 | 0.304  |
| ndl | 1988 | 212 | 21 | 18 | 7.280  | P | 0.200 | 0.045  |
| jun | 1988 | 212 | 21 | 18 | 6.110  | P | 0.200 | 0.317  |
| twr | 1988 | 212 | 21 | 18 | 6.910  | P | 0.200 | 0.252  |
| BMT | 1988 | 212 | 21 | 18 | 10.770 | P | 0.200 | 0.153  |
| CAL | 1988 | 212 | 21 | 18 | 13.030 | P | 0.200 | -0.190 |
| CLC | 1988 | 212 | 21 | 18 | 12.080 | P | 0.200 | 0.174  |
| DTP | 1988 | 212 | 21 | 18 | 13.250 | P | 0.200 | 0.161  |
| ISA | 1988 | 212 | 21 | 18 | 8.420  | P | 0.200 | -0.432 |
| JFS | 1988 | 212 | 21 | 18 | 13.800 | P | 0.200 | 0.376  |
| SRT | 1988 | 212 | 21 | 18 | 11.980 | P | 0.200 | 0.199  |
| TOW | 1988 | 212 | 21 | 18 | 11.740 | P | 0.200 | 0.508  |

|     |      |     |    |    |        |   |       |        |
|-----|------|-----|----|----|--------|---|-------|--------|
| WAS | 1988 | 212 | 21 | 18 | 7.950  | P | 0.200 | -0.538 |
| WBS | 1988 | 212 | 21 | 18 | 10.400 | P | 0.200 | -0.485 |
| WCH | 1988 | 212 | 21 | 18 | 9.830  | P | 0.200 | -0.121 |
| WCS | 1988 | 212 | 21 | 18 | 10.860 | P | 0.200 | 0.456  |
| WHF | 1988 | 212 | 21 | 18 | 8.730  | P | 0.200 | -0.582 |
| WHS | 1988 | 212 | 21 | 18 | 10.470 | P | 0.200 | 0.328  |
| WHV | 1988 | 212 | 21 | 18 | 8.850  | P | 0.200 | -0.607 |
| WJP | 1988 | 212 | 21 | 18 | 9.550  | P | 0.200 | -0.369 |
| WMF | 1988 | 212 | 21 | 18 | 10.080 | P | 0.200 | 0.473  |
| WOR | 1988 | 212 | 21 | 18 | 9.150  | P | 0.200 | -0.681 |
| WRV | 1988 | 212 | 21 | 18 | 10.220 | P | 0.200 | 0.289  |
| WVP | 1988 | 212 | 21 | 18 | 10.840 | P | 0.200 | 0.319  |
| XMS | 1988 | 212 | 21 | 18 | 14.070 | P | 0.200 | 0.195  |
| LRM | 1988 | 212 | 21 | 18 | 12.820 | P | 0.200 | -0.052 |
| WBM | 1988 | 212 | 21 | 18 | 11.360 | P | 0.200 | -0.245 |
| WCX | 1988 | 212 | 21 | 18 | 12.250 | P | 0.200 | -0.063 |
| WLH | 1988 | 212 | 21 | 18 | 8.060  | P | 0.200 | 0.189  |
| WRC | 1988 | 212 | 21 | 18 | 11.450 | P | 0.200 | 0.338  |
| WSC | 1988 | 212 | 21 | 18 | 10.900 | P | 0.200 | -0.286 |

|      |     |    |   |         |          |            |         |     |       |
|------|-----|----|---|---------|----------|------------|---------|-----|-------|
| 1988 | 229 | 10 | 1 | 10.7831 | 51.20600 | -178.19901 | 33.0000 | 428 | 0.000 |
|------|-----|----|---|---------|----------|------------|---------|-----|-------|

|     |      |     |    |   |        |   |       |        |
|-----|------|-----|----|---|--------|---|-------|--------|
| arc | 1988 | 229 | 10 | 9 | 20.470 | P | 0.200 | 0.104  |
| bmd | 1988 | 229 | 10 | 9 | 21.420 | P | 0.200 | 0.328  |
| ccr | 1988 | 229 | 10 | 9 | 15.490 | P | 0.200 | 0.260  |
| jhn | 1988 | 229 | 10 | 9 | 19.400 | P | 0.200 | -0.049 |
| mnk | 1988 | 229 | 10 | 9 | 16.970 | P | 0.200 | 0.208  |
| pmt | 1988 | 229 | 10 | 9 | 21.000 | P | 0.200 | 0.010  |
| BLK | 1988 | 229 | 10 | 9 | 30.610 | P | 0.200 | 0.280  |
| CLC | 1988 | 229 | 10 | 9 | 24.880 | P | 0.200 | 0.027  |
| GSC | 1988 | 229 | 10 | 9 | 31.490 | P | 0.200 | 0.161  |
| TOW | 1988 | 229 | 10 | 9 | 24.360 | P | 0.200 | 0.335  |
| WHV | 1988 | 229 | 10 | 9 | 21.180 | P | 0.200 | -0.649 |
| WJP | 1988 | 229 | 10 | 9 | 21.940 | P | 0.200 | -0.523 |
| WSC | 1988 | 229 | 10 | 9 | 23.530 | P | 0.200 | -0.468 |
| XMS | 1988 | 229 | 10 | 9 | 27.730 | P | 0.200 | 0.290  |
| BMT | 1988 | 229 | 10 | 9 | 23.040 | P | 0.200 | -0.296 |
| FLS | 1988 | 229 | 10 | 9 | 31.880 | P | 0.200 | 0.029  |
| HOD | 1988 | 229 | 10 | 9 | 31.570 | P | 0.200 | 0.041  |
| SRT | 1988 | 229 | 10 | 9 | 24.630 | P | 0.200 | -0.087 |

|      |     |    |    |         |          |           |         |   |        |
|------|-----|----|----|---------|----------|-----------|---------|---|--------|
| 2005 | 165 | 17 | 10 | 17.4586 | 51.23200 | 179.40601 | 51.1000 | 2 | -0.002 |
|------|-----|----|----|---------|----------|-----------|---------|---|--------|

|      |      |     |    |    |        |   |       |        |
|------|------|-----|----|----|--------|---|-------|--------|
| DBO  | 2005 | 165 | 17 | 17 | 38.298 | P | 0.200 | 0.448  |
| YBH  | 2005 | 165 | 17 | 17 | 47.953 | P | 0.200 | 1.059  |
| WDC  | 2005 | 165 | 17 | 17 | 53.750 | P | 0.200 | 0.667  |
| HATC | 2005 | 165 | 17 | 17 | 57.874 | P | 0.200 | 0.249  |
| HOPS | 2005 | 165 | 17 | 17 | 58.312 | P | 0.200 | 0.196  |
| O03C | 2005 | 165 | 17 | 17 | 58.487 | P | 0.200 | -0.029 |
| ELFS | 2005 | 165 | 17 | 18 | 2.722  | P | 0.200 | 0.429  |
| MNRC | 2005 | 165 | 17 | 18 | 2.834  | P | 0.200 | 0.892  |
| SUTB | 2005 | 165 | 17 | 18 | 3.005  | P | 0.200 | -0.452 |
| ORV  | 2005 | 165 | 17 | 18 | 3.171  | P | 0.200 | -0.184 |
| CVS  | 2005 | 165 | 17 | 18 | 4.234  | P | 0.200 | -0.149 |
| FARB | 2005 | 165 | 17 | 18 | 4.498  | P | 0.200 | -0.228 |
| O05C | 2005 | 165 | 17 | 18 | 4.701  | P | 0.200 | 0.305  |
| Q04C | 2005 | 165 | 17 | 18 | 7.431  | P | 0.200 | 0.045  |
| P05C | 2005 | 165 | 17 | 18 | 9.296  | P | 0.200 | -0.019 |
| BDM  | 2005 | 165 | 17 | 18 | 9.528  | P | 0.200 | 0.211  |
| JRSC | 2005 | 165 | 17 | 18 | 9.838  | P | 0.200 | -0.363 |
| LAVA | 2005 | 165 | 17 | 18 | 11.253 | P | 0.200 | 0.079  |
| WENL | 2005 | 165 | 17 | 18 | 11.728 | P | 0.200 | 0.175  |
| R04C | 2005 | 165 | 17 | 18 | 12.411 | P | 0.200 | -0.054 |
| S04C | 2005 | 165 | 17 | 18 | 14.374 | P | 0.200 | 0.058  |
| CMB  | 2005 | 165 | 17 | 18 | 16.667 | P | 0.200 | 0.231  |



|      |      |     |    |    |        |   |       |        |
|------|------|-----|----|----|--------|---|-------|--------|
| PACP | 2005 | 165 | 17 | 18 | 17.116 | P | 0.200 | 0.044  |
| SN71 | 2005 | 165 | 17 | 18 | 18.125 | P | 0.200 | -0.104 |
| SCZ  | 2005 | 165 | 17 | 18 | 18.349 | P | 0.200 | -0.080 |
| HAST | 2005 | 165 | 17 | 18 | 18.763 | P | 0.200 | -0.042 |
| S05C | 2005 | 165 | 17 | 18 | 19.818 | P | 0.200 | -0.280 |
| SN62 | 2005 | 165 | 17 | 18 | 20.485 | P | 0.200 | -0.160 |
| T05C | 2005 | 165 | 17 | 18 | 21.053 | P | 0.200 | 0.438  |
| SN51 | 2005 | 165 | 17 | 18 | 22.035 | P | 0.200 | 0.137  |
| SN67 | 2005 | 165 | 17 | 18 | 22.070 | P | 0.200 | 0.408  |
| V03C | 2005 | 165 | 17 | 18 | 22.306 | P | 0.200 | 0.151  |
| SN57 | 2005 | 165 | 17 | 18 | 23.653 | P | 0.200 | 0.501  |
| SN42 | 2005 | 165 | 17 | 18 | 24.404 | P | 0.200 | -0.024 |
| T06C | 2005 | 165 | 17 | 18 | 24.849 | P | 0.200 | -0.033 |
| SN48 | 2005 | 165 | 17 | 18 | 25.397 | P | 0.200 | 0.280  |
| SN47 | 2005 | 165 | 17 | 18 | 25.632 | P | 0.200 | 0.406  |
| PKD  | 2005 | 165 | 17 | 18 | 26.152 | P | 0.200 | 0.044  |
| V04C | 2005 | 165 | 17 | 18 | 26.340 | P | 0.200 | 0.400  |
| SN21 | 2005 | 165 | 17 | 18 | 26.453 | P | 0.200 | -0.375 |
| U05C | 2005 | 165 | 17 | 18 | 26.722 | P | 0.200 | 0.619  |
| SN38 | 2005 | 165 | 17 | 18 | 27.091 | P | 0.200 | 0.371  |
| MLAC | 2005 | 165 | 17 | 18 | 27.178 | P | 0.200 | 0.731  |
| SN37 | 2005 | 165 | 17 | 18 | 27.343 | P | 0.200 | 0.409  |
| SN11 | 2005 | 165 | 17 | 18 | 27.904 | P | 0.200 | -0.449 |
| SN28 | 2005 | 165 | 17 | 18 | 28.766 | P | 0.200 | 0.442  |
| SN26 | 2005 | 165 | 17 | 18 | 28.789 | P | 0.200 | 0.505  |
| PHL  | 2005 | 165 | 17 | 18 | 29.015 | P | 0.200 | 0.311  |
| HELL | 2005 | 165 | 17 | 18 | 29.779 | P | 0.200 | -0.293 |
| V05C | 2005 | 165 | 17 | 18 | 30.219 | P | 0.200 | 0.667  |
| RCT  | 2005 | 165 | 17 | 18 | 30.266 | P | 0.200 | -0.321 |
| TPH  | 2005 | 165 | 17 | 18 | 31.880 | P | 0.200 | -0.308 |
| SMM  | 2005 | 165 | 17 | 18 | 32.313 | P | 0.200 | 0.279  |
| TIN  | 2005 | 165 | 17 | 18 | 32.520 | P | 0.200 | 0.353  |
| VES  | 2005 | 165 | 17 | 18 | 33.138 | P | 0.200 | -0.650 |
| SDP  | 2005 | 165 | 17 | 18 | 33.494 | P | 0.200 | 0.112  |
| MPP  | 2005 | 165 | 17 | 18 | 35.583 | P | 0.200 | 0.349  |
| BAK  | 2005 | 165 | 17 | 18 | 35.752 | P | 0.200 | -0.413 |
| CWC  | 2005 | 165 | 17 | 18 | 36.165 | P | 0.200 | 0.186  |
| GRA  | 2005 | 165 | 17 | 18 | 36.741 | P | 0.200 | 0.224  |
| ISA  | 2005 | 165 | 17 | 18 | 37.235 | P | 0.200 | -0.487 |
| SBC  | 2005 | 165 | 17 | 18 | 38.009 | P | 0.200 | 0.215  |
| ARV  | 2005 | 165 | 17 | 18 | 38.251 | P | 0.200 | -0.400 |
| SCZ2 | 2005 | 165 | 17 | 18 | 40.137 | P | 0.200 | -0.317 |
| FUR  | 2005 | 165 | 17 | 18 | 41.318 | P | 0.200 | -0.150 |
| OSI  | 2005 | 165 | 17 | 18 | 41.828 | P | 0.200 | -0.041 |
| LGU  | 2005 | 165 | 17 | 18 | 42.192 | P | 0.200 | -0.545 |
| SLA  | 2005 | 165 | 17 | 18 | 42.451 | P | 0.200 | -0.093 |
| TOV  | 2005 | 165 | 17 | 18 | 43.145 | P | 0.200 | -0.510 |
| EDW2 | 2005 | 165 | 17 | 18 | 43.781 | P | 0.200 | -0.216 |
| SNCC | 2005 | 165 | 17 | 18 | 44.685 | P | 0.200 | -0.247 |
| DEC  | 2005 | 165 | 17 | 18 | 45.168 | P | 0.200 | -0.422 |
| DJJ  | 2005 | 165 | 17 | 18 | 45.180 | P | 0.200 | -0.478 |
| VCS  | 2005 | 165 | 17 | 18 | 45.496 | P | 0.200 | -0.028 |
| PAS  | 2005 | 165 | 17 | 18 | 46.444 | P | 0.200 | -0.442 |
| CHF  | 2005 | 165 | 17 | 18 | 46.708 | P | 0.200 | -0.078 |
| MWC  | 2005 | 165 | 17 | 18 | 46.909 | P | 0.200 | -0.368 |
| SHO  | 2005 | 165 | 17 | 18 | 47.142 | P | 0.200 | -0.180 |
| RPV  | 2005 | 165 | 17 | 18 | 47.284 | P | 0.200 | -0.528 |
| GSC  | 2005 | 165 | 17 | 18 | 47.522 | P | 0.200 | -0.216 |
| FMP  | 2005 | 165 | 17 | 18 | 47.927 | P | 0.200 | -0.452 |
| ADO  | 2005 | 165 | 17 | 18 | 48.475 | P | 0.200 | -0.077 |
| VTV  | 2005 | 165 | 17 | 18 | 48.728 | P | 0.200 | -0.176 |
| RRX  | 2005 | 165 | 17 | 18 | 48.846 | P | 0.200 | -0.029 |
| BFS  | 2005 | 165 | 17 | 18 | 48.870 | P | 0.200 | -0.155 |

|     |      |     |    |    |        |   |       |        |
|-----|------|-----|----|----|--------|---|-------|--------|
| CIA | 2005 | 165 | 17 | 18 | 48.940 | P | 0.200 | -0.589 |
| TUQ | 2005 | 165 | 17 | 18 | 51.052 | P | 0.200 | -0.342 |
| SVD | 2005 | 165 | 17 | 18 | 52.099 | P | 0.200 | -0.291 |
| SDD | 2005 | 165 | 17 | 18 | 52.104 | P | 0.200 | -0.205 |
| HEC | 2005 | 165 | 17 | 18 | 52.169 | P | 0.200 | -0.244 |
| BBR | 2005 | 165 | 17 | 18 | 52.364 | P | 0.200 | -0.306 |

|      |     |   |    |        |          |           |          |    |        |
|------|-----|---|----|--------|----------|-----------|----------|----|--------|
| 2005 | 264 | 2 | 25 | 8.4062 | 43.89200 | 146.14500 | 103.0000 | 20 | -0.002 |
|------|-----|---|----|--------|----------|-----------|----------|----|--------|

|      |      |     |   |    |        |   |       |        |
|------|------|-----|---|----|--------|---|-------|--------|
| TAKO | 2005 | 264 | 2 | 35 | 14.381 | P | 0.200 | 0.840  |
| DBO  | 2005 | 264 | 2 | 35 | 20.144 | P | 0.200 | 0.632  |
| HUMO | 2005 | 264 | 2 | 35 | 23.223 | P | 0.200 | 0.723  |
| JCC  | 2005 | 264 | 2 | 35 | 25.923 | P | 0.200 | 0.858  |
| YBH  | 2005 | 264 | 2 | 35 | 27.713 | P | 0.200 | 0.792  |
| N02C | 2005 | 264 | 2 | 35 | 28.532 | P | 0.200 | 0.505  |
| M02C | 2005 | 264 | 2 | 35 | 28.568 | P | 0.200 | 0.918  |
| M03C | 2005 | 264 | 2 | 35 | 31.389 | P | 0.200 | 0.246  |
| WDC  | 2005 | 264 | 2 | 35 | 32.243 | P | 0.200 | 0.254  |
| P01C | 2005 | 264 | 2 | 35 | 33.347 | P | 0.200 | 0.197  |
| M05C | 2005 | 264 | 2 | 35 | 34.948 | P | 0.200 | 0.247  |
| HATC | 2005 | 264 | 2 | 35 | 35.845 | P | 0.200 | 0.312  |
| HOPS | 2005 | 264 | 2 | 35 | 36.184 | P | 0.200 | -0.039 |
| O03C | 2005 | 264 | 2 | 35 | 36.207 | P | 0.200 | -0.174 |
| O04C | 2005 | 264 | 2 | 35 | 39.371 | P | 0.200 | 0.335  |
| ORV  | 2005 | 264 | 2 | 35 | 39.604 | P | 0.200 | -0.663 |
| ELFS | 2005 | 264 | 2 | 35 | 39.746 | P | 0.200 | 0.550  |
| MNRC | 2005 | 264 | 2 | 35 | 39.815 | P | 0.200 | 0.536  |
| CVS  | 2005 | 264 | 2 | 35 | 40.902 | P | 0.200 | -0.288 |
| O05C | 2005 | 264 | 2 | 35 | 40.992 | P | 0.200 | 0.041  |
| FARB | 2005 | 264 | 2 | 35 | 41.065 | P | 0.200 | -0.328 |
| Q03C | 2005 | 264 | 2 | 35 | 42.742 | P | 0.200 | 0.955  |
| BRK  | 2005 | 264 | 2 | 35 | 43.551 | P | 0.200 | -0.273 |
| Q04C | 2005 | 264 | 2 | 35 | 43.562 | P | 0.200 | 0.111  |
| BKS  | 2005 | 264 | 2 | 35 | 43.792 | P | 0.200 | -0.056 |
| BRIB | 2005 | 264 | 2 | 35 | 43.909 | P | 0.200 | -0.055 |
| P05C | 2005 | 264 | 2 | 35 | 44.756 | P | 0.200 | -0.194 |
| JRSC | 2005 | 264 | 2 | 35 | 45.242 | P | 0.200 | -0.526 |
| LAVA | 2005 | 264 | 2 | 35 | 46.152 | P | 0.200 | -0.329 |
| BNLO | 2005 | 264 | 2 | 35 | 46.630 | P | 0.200 | -0.480 |
| WENL | 2005 | 264 | 2 | 35 | 46.804 | P | 0.200 | -0.030 |
| R04C | 2005 | 264 | 2 | 35 | 47.096 | P | 0.200 | -0.362 |
| MHC  | 2005 | 264 | 2 | 35 | 48.466 | P | 0.200 | -0.101 |
| S04C | 2005 | 264 | 2 | 35 | 48.971 | P | 0.200 | -0.098 |
| R05C | 2005 | 264 | 2 | 35 | 49.403 | P | 0.200 | -0.070 |
| SN95 | 2005 | 264 | 2 | 35 | 50.025 | P | 0.200 | -0.091 |
| CMB  | 2005 | 264 | 2 | 35 | 50.633 | P | 0.200 | 0.012  |
| SN84 | 2005 | 264 | 2 | 35 | 50.988 | P | 0.200 | -0.348 |
| SAO  | 2005 | 264 | 2 | 35 | 51.177 | P | 0.200 | -0.255 |
| PACP | 2005 | 264 | 2 | 35 | 51.244 | P | 0.200 | 0.056  |
| SN71 | 2005 | 264 | 2 | 35 | 51.467 | P | 0.200 | -0.617 |
| SN85 | 2005 | 264 | 2 | 35 | 51.530 | P | 0.200 | -0.098 |
| SN86 | 2005 | 264 | 2 | 35 | 51.677 | P | 0.200 | 0.207  |
| HAST | 2005 | 264 | 2 | 35 | 52.290 | P | 0.200 | -0.262 |
| SN73 | 2005 | 264 | 2 | 35 | 52.291 | P | 0.200 | -0.365 |
| SN74 | 2005 | 264 | 2 | 35 | 52.550 | P | 0.200 | -0.255 |
| R06C | 2005 | 264 | 2 | 35 | 52.836 | P | 0.200 | 0.247  |
| S05C | 2005 | 264 | 2 | 35 | 52.978 | P | 0.200 | -0.582 |
| SN62 | 2005 | 264 | 2 | 35 | 53.488 | P | 0.200 | -0.519 |
| SN63 | 2005 | 264 | 2 | 35 | 54.175 | P | 0.200 | -0.254 |
| T05C | 2005 | 264 | 2 | 35 | 54.410 | P | 0.200 | 0.409  |
| SN64 | 2005 | 264 | 2 | 35 | 54.431 | P | 0.200 | -0.132 |
| SN66 | 2005 | 264 | 2 | 35 | 54.666 | P | 0.200 | 0.130  |
| SN51 | 2005 | 264 | 2 | 35 | 54.956 | P | 0.200 | 0.021  |
| SN67 | 2005 | 264 | 2 | 35 | 55.004 | P | 0.200 | 0.286  |

|      |      |     |   |    |        |   |       |        |
|------|------|-----|---|----|--------|---|-------|--------|
| SN52 | 2005 | 264 | 2 | 35 | 55.099 | P | 0.200 | -0.506 |
| SN53 | 2005 | 264 | 2 | 35 | 55.314 | P | 0.200 | -0.433 |
| V03C | 2005 | 264 | 2 | 35 | 55.344 | P | 0.200 | 0.213  |
| SN54 | 2005 | 264 | 2 | 35 | 55.514 | P | 0.200 | -0.044 |
| SN55 | 2005 | 264 | 2 | 35 | 55.690 | P | 0.200 | 0.008  |
| U04C | 2005 | 264 | 2 | 35 | 55.935 | P | 0.200 | 0.225  |
| SN56 | 2005 | 264 | 2 | 35 | 56.195 | P | 0.200 | 0.145  |
| R07C | 2005 | 264 | 2 | 35 | 56.210 | P | 0.200 | 0.255  |
| SN57 | 2005 | 264 | 2 | 35 | 56.352 | P | 0.200 | 0.480  |
| SN42 | 2005 | 264 | 2 | 35 | 56.647 | P | 0.200 | -0.281 |
| SN43 | 2005 | 264 | 2 | 35 | 56.701 | P | 0.200 | -0.258 |
| T06C | 2005 | 264 | 2 | 35 | 57.188 | P | 0.200 | -0.145 |
| SN44 | 2005 | 264 | 2 | 35 | 57.198 | P | 0.200 | -0.074 |
| SN45 | 2005 | 264 | 2 | 35 | 57.483 | P | 0.200 | 0.130  |
| SN48 | 2005 | 264 | 2 | 35 | 57.712 | P | 0.200 | 0.251  |
| SN47 | 2005 | 264 | 2 | 35 | 57.860 | P | 0.200 | 0.269  |
| MNV  | 2005 | 264 | 2 | 35 | 57.960 | P | 0.200 | 0.116  |
| PKD  | 2005 | 264 | 2 | 35 | 58.084 | P | 0.200 | -0.205 |
| SN46 | 2005 | 264 | 2 | 35 | 58.178 | P | 0.200 | 0.420  |
| V04C | 2005 | 264 | 2 | 35 | 58.462 | P | 0.200 | 0.379  |
| RAMR | 2005 | 264 | 2 | 35 | 58.463 | P | 0.200 | 0.383  |
| SN22 | 2005 | 264 | 2 | 35 | 58.525 | P | 0.200 | -0.300 |
| SN23 | 2005 | 264 | 2 | 35 | 58.792 | P | 0.200 | -0.301 |
| U05C | 2005 | 264 | 2 | 35 | 58.890 | P | 0.200 | 0.663  |
| SN38 | 2005 | 264 | 2 | 35 | 58.965 | P | 0.200 | 0.312  |
| SN37 | 2005 | 264 | 2 | 35 | 59.110 | P | 0.200 | 0.226  |
| SN36 | 2005 | 264 | 2 | 35 | 59.253 | P | 0.200 | 0.281  |
| SN11 | 2005 | 264 | 2 | 35 | 59.343 | P | 0.200 | -0.650 |
| SN24 | 2005 | 264 | 2 | 35 | 59.352 | P | 0.200 | -0.015 |
| SN25 | 2005 | 264 | 2 | 36 | 0.166  | P | 0.200 | 0.009  |
| SN28 | 2005 | 264 | 2 | 36 | 0.274  | P | 0.200 | 0.383  |
| SN26 | 2005 | 264 | 2 | 36 | 0.404  | P | 0.200 | 0.501  |
| HELL | 2005 | 264 | 2 | 36 | 0.785  | P | 0.200 | -0.621 |
| SN15 | 2005 | 264 | 2 | 36 | 0.990  | P | 0.200 | 0.147  |
| RCT  | 2005 | 264 | 2 | 36 | 1.366  | P | 0.200 | -0.383 |
| V05C | 2005 | 264 | 2 | 36 | 1.494  | P | 0.200 | 0.556  |
| S08C | 2005 | 264 | 2 | 36 | 1.997  | P | 0.200 | 0.306  |
| SN16 | 2005 | 264 | 2 | 36 | 2.018  | P | 0.200 | 0.189  |
| TIN  | 2005 | 264 | 2 | 36 | 3.238  | P | 0.200 | 0.180  |
| SMM  | 2005 | 264 | 2 | 36 | 3.264  | P | 0.200 | 0.326  |
| VES  | 2005 | 264 | 2 | 36 | 3.518  | P | 0.200 | -0.807 |
| SDP  | 2005 | 264 | 2 | 36 | 3.690  | P | 0.200 | -0.299 |
| MPP  | 2005 | 264 | 2 | 36 | 5.706  | P | 0.200 | 0.266  |
| CWC  | 2005 | 264 | 2 | 36 | 5.894  | P | 0.200 | -0.180 |
| ISA  | 2005 | 264 | 2 | 36 | 6.468  | P | 0.200 | -0.904 |
| GRA  | 2005 | 264 | 2 | 36 | 6.691  | P | 0.200 | 0.380  |
| ARV  | 2005 | 264 | 2 | 36 | 7.471  | P | 0.200 | -0.612 |
| SBC  | 2005 | 264 | 2 | 36 | 7.508  | P | 0.200 | 0.084  |
| SCZ2 | 2005 | 264 | 2 | 36 | 9.125  | P | 0.200 | -0.301 |
| MPM  | 2005 | 264 | 2 | 36 | 9.598  | P | 0.200 | -0.237 |
| FUR  | 2005 | 264 | 2 | 36 | 10.429 | P | 0.200 | 0.257  |
| LGU  | 2005 | 264 | 2 | 36 | 10.685 | P | 0.200 | -0.635 |
| LRL  | 2005 | 264 | 2 | 36 | 10.958 | P | 0.200 | -0.326 |
| EDW2 | 2005 | 264 | 2 | 36 | 12.341 | P | 0.200 | 0.061  |
| SNCC | 2005 | 264 | 2 | 36 | 12.702 | P | 0.200 | -0.261 |
| DEC  | 2005 | 264 | 2 | 36 | 13.073 | P | 0.200 | -0.482 |
| SHO  | 2005 | 264 | 2 | 36 | 14.623 | P | 0.200 | -0.206 |
| GSC  | 2005 | 264 | 2 | 36 | 15.062 | P | 0.200 | -0.150 |
| FMP  | 2005 | 264 | 2 | 36 | 15.359 | P | 0.200 | -0.278 |
| CIA  | 2005 | 264 | 2 | 36 | 15.974 | P | 0.200 | -0.612 |
| RRX  | 2005 | 264 | 2 | 36 | 16.132 | P | 0.200 | 0.057  |
| TUQ  | 2005 | 264 | 2 | 36 | 18.014 | P | 0.200 | 0.009  |
| BBR  | 2005 | 264 | 2 | 36 | 18.739 | P | 0.200 | -0.446 |

|      |      |     |    |         |          |           |         |        |    |       |
|------|------|-----|----|---------|----------|-----------|---------|--------|----|-------|
| HEC  | 2005 | 264 | 2  | 36      | 18.788   | P         | 0.200   | -0.089 |    |       |
| 2005 | 288  | 10  | 6  | 17.6870 | 46.81600 | 154.11301 | 42.8000 |        | 28 | 0.000 |
| DBO  | 2005 | 288 | 10 | 15      | 52.296   | P         | 0.200   | 0.787  |    |       |
| HUMO | 2005 | 288 | 10 | 15      | 55.432   | P         | 0.200   | 0.729  |    |       |
| JCC  | 2005 | 288 | 10 | 15      | 58.293   | P         | 0.200   | 0.913  |    |       |
| YBH  | 2005 | 288 | 10 | 16      | 0.356    | P         | 0.200   | 0.942  |    |       |
| N02C | 2005 | 288 | 10 | 16      | 1.171    | P         | 0.200   | 0.607  |    |       |
| M02C | 2005 | 288 | 10 | 16      | 1.200    | P         | 0.200   | 1.016  |    |       |
| M04C | 2005 | 288 | 10 | 16      | 3.565    | P         | 0.200   | 0.510  |    |       |
| M03C | 2005 | 288 | 10 | 16      | 4.277    | P         | 0.200   | 0.356  |    |       |
| WDC  | 2005 | 288 | 10 | 16      | 5.229    | P         | 0.200   | 0.403  |    |       |
| P01C | 2005 | 288 | 10 | 16      | 6.392    | P         | 0.200   | 0.354  |    |       |
| M05C | 2005 | 288 | 10 | 16      | 8.167    | P         | 0.200   | 0.413  |    |       |
| GASB | 2005 | 288 | 10 | 16      | 9.002    | P         | 0.200   | 0.801  |    |       |
| HATC | 2005 | 288 | 10 | 16      | 9.052    | P         | 0.200   | 0.419  |    |       |
| O03C | 2005 | 288 | 10 | 16      | 9.353    | P         | 0.200   | -0.163 |    |       |
| HOPS | 2005 | 288 | 10 | 16      | 9.393    | P         | 0.200   | 0.082  |    |       |
| M06C | 2005 | 288 | 10 | 16      | 11.776   | P         | 0.200   | 0.511  |    |       |
| O04C | 2005 | 288 | 10 | 16      | 12.771   | P         | 0.200   | 0.393  |    |       |
| ORV  | 2005 | 288 | 10 | 16      | 13.032   | P         | 0.200   | -0.650 |    |       |
| MNRC | 2005 | 288 | 10 | 16      | 13.096   | P         | 0.200   | 0.509  |    |       |
| ELFS | 2005 | 288 | 10 | 16      | 13.130   | P         | 0.200   | 0.550  |    |       |
| SUTB | 2005 | 288 | 10 | 16      | 13.184   | P         | 0.200   | -0.602 |    |       |
| CVS  | 2005 | 288 | 10 | 16      | 14.381   | P         | 0.200   | -0.272 |    |       |
| FARB | 2005 | 288 | 10 | 16      | 14.576   | P         | 0.200   | -0.323 |    |       |
| O05C | 2005 | 288 | 10 | 16      | 14.638   | P         | 0.200   | 0.182  |    |       |
| Q03C | 2005 | 288 | 10 | 16      | 16.321   | P         | 0.200   | 1.015  |    |       |
| Q04C | 2005 | 288 | 10 | 16      | 17.075   | P         | 0.200   | -0.036 |    |       |
| BRK  | 2005 | 288 | 10 | 16      | 17.228   | P         | 0.200   | -0.265 |    |       |
| BKS  | 2005 | 288 | 10 | 16      | 17.526   | P         | 0.200   | -0.001 |    |       |
| BRIB | 2005 | 288 | 10 | 16      | 17.755   | P         | 0.200   | 0.088  |    |       |
| P05C | 2005 | 288 | 10 | 16      | 18.724   | P         | 0.200   | 0.005  |    |       |
| JRSC | 2005 | 288 | 10 | 16      | 19.166   | P         | 0.200   | -0.415 |    |       |
| LAVA | 2005 | 288 | 10 | 16      | 20.082   | P         | 0.200   | -0.268 |    |       |
| BNLO | 2005 | 288 | 10 | 16      | 20.457   | P         | 0.200   | -0.581 |    |       |
| WENL | 2005 | 288 | 10 | 16      | 20.706   | P         | 0.200   | -0.019 |    |       |
| R04C | 2005 | 288 | 10 | 16      | 21.108   | P         | 0.200   | -0.318 |    |       |
| MHC  | 2005 | 288 | 10 | 16      | 22.436   | P         | 0.200   | -0.140 |    |       |
| S04C | 2005 | 288 | 10 | 16      | 22.985   | P         | 0.200   | -0.132 |    |       |
| R05C | 2005 | 288 | 10 | 16      | 23.548   | P         | 0.200   | -0.030 |    |       |
| SN95 | 2005 | 288 | 10 | 16      | 24.171   | P         | 0.200   | -0.094 |    |       |
| CMB  | 2005 | 288 | 10 | 16      | 24.874   | P         | 0.200   | 0.065  |    |       |
| SN84 | 2005 | 288 | 10 | 16      | 25.267   | P         | 0.200   | -0.283 |    |       |
| PACP | 2005 | 288 | 10 | 16      | 25.370   | P         | 0.200   | -0.037 |    |       |
| SAO  | 2005 | 288 | 10 | 16      | 25.381   | P         | 0.200   | -0.292 |    |       |
| SN85 | 2005 | 288 | 10 | 16      | 25.730   | P         | 0.200   | -0.135 |    |       |
| SN86 | 2005 | 288 | 10 | 16      | 25.863   | P         | 0.200   | 0.169  |    |       |
| SN71 | 2005 | 288 | 10 | 16      | 25.867   | P         | 0.200   | -0.495 |    |       |
| HAST | 2005 | 288 | 10 | 16      | 26.579   | P         | 0.200   | -0.283 |    |       |
| SN73 | 2005 | 288 | 10 | 16      | 26.726   | P         | 0.200   | -0.252 |    |       |
| SN74 | 2005 | 288 | 10 | 16      | 26.892   | P         | 0.200   | -0.237 |    |       |
| R06C | 2005 | 288 | 10 | 16      | 27.172   | P         | 0.200   | 0.264  |    |       |
| S05C | 2005 | 288 | 10 | 16      | 27.387   | P         | 0.200   | -0.559 |    |       |
| S06C | 2005 | 288 | 10 | 16      | 27.630   | P         | 0.200   | -0.249 |    |       |
| SN76 | 2005 | 288 | 10 | 16      | 27.743   | P         | 0.200   | 0.351  |    |       |
| SN62 | 2005 | 288 | 10 | 16      | 27.924   | P         | 0.200   | -0.493 |    |       |
| T05C | 2005 | 288 | 10 | 16      | 28.802   | P         | 0.200   | 0.390  |    |       |
| SN64 | 2005 | 288 | 10 | 16      | 28.894   | P         | 0.200   | -0.108 |    |       |
| SN66 | 2005 | 288 | 10 | 16      | 29.132   | P         | 0.200   | 0.159  |    |       |
| SN67 | 2005 | 288 | 10 | 16      | 29.450   | P         | 0.200   | 0.247  |    |       |
| SN51 | 2005 | 288 | 10 | 16      | 29.474   | P         | 0.200   | 0.031  |    |       |
| SN52 | 2005 | 288 | 10 | 16      | 29.613   | P         | 0.200   | -0.555 |    |       |

|      |      |     |    |    |        |   |       |        |
|------|------|-----|----|----|--------|---|-------|--------|
| V03C | 2005 | 288 | 10 | 16 | 29.791 | P | 0.200 | 0.126  |
| SN53 | 2005 | 288 | 10 | 16 | 29.871 | P | 0.200 | -0.411 |
| SN54 | 2005 | 288 | 10 | 16 | 30.055 | P | 0.200 | -0.019 |
| SN55 | 2005 | 288 | 10 | 16 | 30.294 | P | 0.200 | 0.067  |
| U04C | 2005 | 288 | 10 | 16 | 30.458 | P | 0.200 | 0.189  |
| R07C | 2005 | 288 | 10 | 16 | 30.741 | P | 0.200 | 0.234  |
| SN56 | 2005 | 288 | 10 | 16 | 30.872 | P | 0.200 | 0.259  |
| SN57 | 2005 | 288 | 10 | 16 | 30.893 | P | 0.200 | 0.435  |
| SN43 | 2005 | 288 | 10 | 16 | 31.294 | P | 0.200 | -0.297 |
| T06C | 2005 | 288 | 10 | 16 | 31.734 | P | 0.200 | -0.285 |
| SN44 | 2005 | 288 | 10 | 16 | 31.928 | P | 0.200 | -0.012 |
| SN45 | 2005 | 288 | 10 | 16 | 32.219 | P | 0.200 | 0.177  |
| SN48 | 2005 | 288 | 10 | 16 | 32.370 | P | 0.200 | 0.221  |
| SN47 | 2005 | 288 | 10 | 16 | 32.570 | P | 0.200 | 0.291  |
| SN46 | 2005 | 288 | 10 | 16 | 32.791 | P | 0.200 | 0.336  |
| PKD  | 2005 | 288 | 10 | 16 | 32.807 | P | 0.200 | -0.251 |
| MNV  | 2005 | 288 | 10 | 16 | 32.819 | P | 0.200 | 0.220  |
| V04C | 2005 | 288 | 10 | 16 | 33.138 | P | 0.200 | 0.278  |
| RAMR | 2005 | 288 | 10 | 16 | 33.138 | P | 0.200 | 0.280  |
| SN22 | 2005 | 288 | 10 | 16 | 33.274 | P | 0.200 | -0.348 |
| SN34 | 2005 | 288 | 10 | 16 | 33.343 | P | 0.200 | -0.088 |
| U05C | 2005 | 288 | 10 | 16 | 33.617 | P | 0.200 | 0.608  |
| SN23 | 2005 | 288 | 10 | 16 | 33.702 | P | 0.200 | -0.188 |
| SN38 | 2005 | 288 | 10 | 16 | 33.819 | P | 0.200 | 0.358  |
| SN37 | 2005 | 288 | 10 | 16 | 33.922 | P | 0.200 | 0.227  |
| SN36 | 2005 | 288 | 10 | 16 | 34.022 | P | 0.200 | 0.232  |
| SN11 | 2005 | 288 | 10 | 16 | 34.250 | P | 0.200 | -0.645 |
| SN25 | 2005 | 288 | 10 | 16 | 35.011 | P | 0.200 | -0.035 |
| SN28 | 2005 | 288 | 10 | 16 | 35.281 | P | 0.200 | 0.485  |
| HELL | 2005 | 288 | 10 | 16 | 35.784 | P | 0.200 | -0.607 |
| SN15 | 2005 | 288 | 10 | 16 | 35.941 | P | 0.200 | 0.160  |
| RCT  | 2005 | 288 | 10 | 16 | 36.263 | P | 0.200 | -0.526 |
| V05C | 2005 | 288 | 10 | 16 | 36.380 | P | 0.200 | 0.460  |
| S08C | 2005 | 288 | 10 | 16 | 37.014 | P | 0.200 | 0.320  |
| SN16 | 2005 | 288 | 10 | 16 | 37.101 | P | 0.200 | 0.256  |
| TPH  | 2005 | 288 | 10 | 16 | 37.939 | P | 0.200 | -0.078 |
| SMM  | 2005 | 288 | 10 | 16 | 38.247 | P | 0.200 | 0.189  |
| TIN  | 2005 | 288 | 10 | 16 | 38.316 | P | 0.200 | 0.152  |
| VES  | 2005 | 288 | 10 | 16 | 38.704 | P | 0.200 | -0.841 |
| MPP  | 2005 | 288 | 10 | 16 | 40.829 | P | 0.200 | 0.070  |
| CWC  | 2005 | 288 | 10 | 16 | 41.198 | P | 0.200 | -0.220 |
| ISA  | 2005 | 288 | 10 | 16 | 41.841 | P | 0.200 | -1.006 |
| GRA  | 2005 | 288 | 10 | 16 | 42.148 | P | 0.200 | 0.416  |
| SBC  | 2005 | 288 | 10 | 16 | 42.904 | P | 0.200 | -0.003 |
| ARV  | 2005 | 288 | 10 | 16 | 42.906 | P | 0.200 | -0.713 |
| MPM  | 2005 | 288 | 10 | 16 | 45.246 | P | 0.200 | -0.222 |
| FUR  | 2005 | 288 | 10 | 16 | 46.044 | P | 0.200 | 0.152  |
| OSI  | 2005 | 288 | 10 | 16 | 46.184 | P | 0.200 | -0.196 |
| LGU  | 2005 | 288 | 10 | 16 | 46.378 | P | 0.200 | -0.716 |
| LRL  | 2005 | 288 | 10 | 16 | 46.624 | P | 0.200 | -0.417 |
| EDW2 | 2005 | 288 | 10 | 16 | 48.051 | P | 0.200 | -0.088 |
| SNCC | 2005 | 288 | 10 | 16 | 48.499 | P | 0.200 | -0.383 |
| DEC  | 2005 | 288 | 10 | 16 | 48.933 | P | 0.200 | -0.567 |
| SHO  | 2005 | 288 | 10 | 16 | 50.636 | P | 0.200 | -0.250 |
| GSC  | 2005 | 288 | 10 | 16 | 50.995 | P | 0.200 | -0.293 |
| FMP  | 2005 | 288 | 10 | 16 | 51.406 | P | 0.200 | -0.363 |
| BFS  | 2005 | 288 | 10 | 16 | 51.864 | P | 0.200 | -0.542 |
| RRX  | 2005 | 288 | 10 | 16 | 52.091 | P | 0.200 | -0.139 |
| CIA  | 2005 | 288 | 10 | 16 | 52.240 | P | 0.200 | -0.535 |
| TUQ  | 2005 | 288 | 10 | 16 | 54.122 | P | 0.200 | -0.193 |
| HEC  | 2005 | 288 | 10 | 16 | 55.008 | P | 0.200 | -0.224 |
| BBR  | 2005 | 288 | 10 | 16 | 55.062 | P | 0.200 | -0.468 |

|      |      |     |    |         |          |           |          |    |       |
|------|------|-----|----|---------|----------|-----------|----------|----|-------|
| 2005 | 296  | 10  | 8  | 15.4064 | 37.37700 | 134.55600 | 380.7000 | 30 | 0.007 |
| TAKO | 2005 | 296 | 10 | 19      | 1.784 P  | 0.200     | 0.920    |    |       |
| DBO  | 2005 | 296 | 10 | 19      | 6.637 P  | 0.200     | 0.560    |    |       |
| HUMO | 2005 | 296 | 10 | 19      | 9.457 P  | 0.200     | 0.788    |    |       |
| JCC  | 2005 | 296 | 10 | 19      | 11.661 P | 0.200     | 0.792    |    |       |
| YBH  | 2005 | 296 | 10 | 19      | 13.218 P | 0.200     | 0.746    |    |       |
| N02C | 2005 | 296 | 10 | 19      | 13.881 P | 0.200     | 0.445    |    |       |
| M02C | 2005 | 296 | 10 | 19      | 13.974 P | 0.200     | 0.867    |    |       |
| M04C | 2005 | 296 | 10 | 19      | 15.772 P | 0.200     | 0.349    |    |       |
| M03C | 2005 | 296 | 10 | 19      | 16.336 P | 0.200     | 0.176    |    |       |
| WDC  | 2005 | 296 | 10 | 19      | 17.098 P | 0.200     | 0.247    |    |       |
| P01C | 2005 | 296 | 10 | 19      | 18.071 P | 0.200     | 0.224    |    |       |
| M05C | 2005 | 296 | 10 | 19      | 19.358 P | 0.200     | 0.113    |    |       |
| HATC | 2005 | 296 | 10 | 19      | 20.141 P | 0.200     | 0.188    |    |       |
| O03C | 2005 | 296 | 10 | 19      | 20.370 P | 0.200     | -0.303   |    |       |
| GASB | 2005 | 296 | 10 | 19      | 20.415 P | 0.200     | 0.762    |    |       |
| HOPS | 2005 | 296 | 10 | 19      | 20.497 P | 0.200     | -0.034   |    |       |
| M06C | 2005 | 296 | 10 | 19      | 22.325 P | 0.200     | 0.298    |    |       |
| O04C | 2005 | 296 | 10 | 19      | 23.247 P | 0.200     | 0.278    |    |       |
| ORV  | 2005 | 296 | 10 | 19      | 23.386 P | 0.200     | -0.648   |    |       |
| SUTB | 2005 | 296 | 10 | 19      | 23.509 P | 0.200     | -0.580   |    |       |
| ELFS | 2005 | 296 | 10 | 19      | 23.538 P | 0.200     | 0.447    |    |       |
| MNRC | 2005 | 296 | 10 | 19      | 23.725 P | 0.200     | 0.538    |    |       |
| CVS  | 2005 | 296 | 10 | 19      | 24.564 P | 0.200     | -0.221   |    |       |
| O05C | 2005 | 296 | 10 | 19      | 24.582 P | 0.200     | -0.004   |    |       |
| FARB | 2005 | 296 | 10 | 19      | 24.588 P | 0.200     | -0.290   |    |       |
| Q03C | 2005 | 296 | 10 | 19      | 26.282 P | 0.200     | 0.994    |    |       |
| BRK  | 2005 | 296 | 10 | 19      | 26.832 P | 0.200     | -0.214   |    |       |
| Q04C | 2005 | 296 | 10 | 19      | 26.876 P | 0.200     | 0.152    |    |       |
| BKS  | 2005 | 296 | 10 | 19      | 27.061 P | 0.200     | 0.027    |    |       |
| BRIB | 2005 | 296 | 10 | 19      | 27.209 P | 0.200     | 0.079    |    |       |
| P05C | 2005 | 296 | 10 | 19      | 27.864 P | 0.200     | -0.200   |    |       |
| BDM  | 2005 | 296 | 10 | 19      | 28.180 P | 0.200     | 0.076    |    |       |
| JRSC | 2005 | 296 | 10 | 19      | 28.284 P | 0.200     | -0.403   |    |       |
| LAVA | 2005 | 296 | 10 | 19      | 29.024 P | 0.200     | -0.356   |    |       |
| BNLO | 2005 | 296 | 10 | 19      | 29.425 P | 0.200     | -0.403   |    |       |
| WENL | 2005 | 296 | 10 | 19      | 29.618 P | 0.200     | 0.001    |    |       |
| R04C | 2005 | 296 | 10 | 19      | 29.790 P | 0.200     | -0.370   |    |       |
| MHC  | 2005 | 296 | 10 | 19      | 31.053 P | 0.200     | -0.096   |    |       |
| S04C | 2005 | 296 | 10 | 19      | 31.486 P | 0.200     | -0.104   |    |       |
| R05C | 2005 | 296 | 10 | 19      | 31.935 P | 0.200     | -0.034   |    |       |
| SN95 | 2005 | 296 | 10 | 19      | 32.343 P | 0.200     | -0.159   |    |       |
| CMB  | 2005 | 296 | 10 | 19      | 32.801 P | 0.200     | -0.096   |    |       |
| SN84 | 2005 | 296 | 10 | 19      | 33.197 P | 0.200     | -0.358   |    |       |
| SAO  | 2005 | 296 | 10 | 19      | 33.264 P | 0.200     | -0.284   |    |       |
| PACP | 2005 | 296 | 10 | 19      | 33.493 P | 0.200     | 0.137    |    |       |
| SN71 | 2005 | 296 | 10 | 19      | 33.516 P | 0.200     | -0.645   |    |       |
| SN85 | 2005 | 296 | 10 | 19      | 33.708 P | 0.200     | -0.109   |    |       |
| SN86 | 2005 | 296 | 10 | 19      | 33.845 P | 0.200     | 0.148    |    |       |
| SN73 | 2005 | 296 | 10 | 19      | 34.239 P | 0.200     | -0.414   |    |       |
| HAST | 2005 | 296 | 10 | 19      | 34.256 P | 0.200     | -0.235   |    |       |
| SN74 | 2005 | 296 | 10 | 19      | 34.544 P | 0.200     | -0.277   |    |       |
| R06C | 2005 | 296 | 10 | 19      | 34.877 P | 0.200     | 0.240    |    |       |
| S05C | 2005 | 296 | 10 | 19      | 34.913 P | 0.200     | -0.491   |    |       |
| S06C | 2005 | 296 | 10 | 19      | 35.122 P | 0.200     | -0.285   |    |       |
| SN76 | 2005 | 296 | 10 | 19      | 35.265 P | 0.200     | 0.226    |    |       |
| SN62 | 2005 | 296 | 10 | 19      | 35.291 P | 0.200     | -0.522   |    |       |
| SN64 | 2005 | 296 | 10 | 19      | 36.202 P | 0.200     | -0.156   |    |       |
| T05C | 2005 | 296 | 10 | 19      | 36.213 P | 0.200     | 0.442    |    |       |
| SN66 | 2005 | 296 | 10 | 19      | 36.503 P | 0.200     | 0.169    |    |       |
| SN52 | 2005 | 296 | 10 | 19      | 36.605 P | 0.200     | -0.564   |    |       |
| SN51 | 2005 | 296 | 10 | 19      | 36.640 P | 0.200     | 0.074    |    |       |
| SN67 | 2005 | 296 | 10 | 19      | 36.794 P | 0.200     | 0.336    |    |       |

|      |      |     |    |    |        |   |       |        |
|------|------|-----|----|----|--------|---|-------|--------|
| SN53 | 2005 | 296 | 10 | 19 | 36.895 | P | 0.200 | -0.459 |
| V03C | 2005 | 296 | 10 | 19 | 36.968 | P | 0.200 | 0.311  |
| SN54 | 2005 | 296 | 10 | 19 | 37.086 | P | 0.200 | -0.117 |
| SN55 | 2005 | 296 | 10 | 19 | 37.348 | P | 0.200 | 0.043  |
| U04C | 2005 | 296 | 10 | 19 | 37.576 | P | 0.200 | 0.371  |
| SN56 | 2005 | 296 | 10 | 19 | 37.820 | P | 0.200 | 0.163  |
| R07C | 2005 | 296 | 10 | 19 | 37.834 | P | 0.200 | 0.266  |
| SN57 | 2005 | 296 | 10 | 19 | 37.964 | P | 0.200 | 0.532  |
| SN43 | 2005 | 296 | 10 | 19 | 38.120 | P | 0.200 | -0.293 |
| T06C | 2005 | 296 | 10 | 19 | 38.339 | P | 0.200 | -0.334 |
| SN44 | 2005 | 296 | 10 | 19 | 38.607 | P | 0.200 | -0.037 |
| SN45 | 2005 | 296 | 10 | 19 | 38.892 | P | 0.200 | 0.166  |
| SN48 | 2005 | 296 | 10 | 19 | 39.117 | P | 0.200 | 0.268  |
| SN47 | 2005 | 296 | 10 | 19 | 39.200 | P | 0.200 | 0.220  |
| PKD  | 2005 | 296 | 10 | 19 | 39.291 | P | 0.200 | -0.146 |
| SN46 | 2005 | 296 | 10 | 19 | 39.448 | P | 0.200 | 0.333  |
| SN22 | 2005 | 296 | 10 | 19 | 39.539 | P | 0.200 | -0.429 |
| V04C | 2005 | 296 | 10 | 19 | 39.604 | P | 0.200 | 0.395  |
| RAMR | 2005 | 296 | 10 | 19 | 39.605 | P | 0.200 | 0.398  |
| SN34 | 2005 | 296 | 10 | 19 | 39.793 | P | 0.200 | -0.118 |
| SN23 | 2005 | 296 | 10 | 19 | 39.844 | P | 0.200 | -0.390 |
| U05C | 2005 | 296 | 10 | 19 | 39.960 | P | 0.200 | 0.602  |
| SN38 | 2005 | 296 | 10 | 19 | 40.140 | P | 0.200 | 0.312  |
| SN37 | 2005 | 296 | 10 | 19 | 40.205 | P | 0.200 | 0.155  |
| SN11 | 2005 | 296 | 10 | 19 | 40.247 | P | 0.200 | -0.641 |
| SN36 | 2005 | 296 | 10 | 19 | 40.375 | P | 0.200 | 0.275  |
| SN25 | 2005 | 296 | 10 | 19 | 41.181 | P | 0.200 | 0.046  |
| SN28 | 2005 | 296 | 10 | 19 | 41.303 | P | 0.200 | 0.430  |
| SN26 | 2005 | 296 | 10 | 19 | 41.325 | P | 0.200 | 0.452  |
| HELL | 2005 | 296 | 10 | 19 | 41.520 | P | 0.200 | -0.615 |
| SN15 | 2005 | 296 | 10 | 19 | 41.851 | P | 0.200 | 0.132  |
| RCT  | 2005 | 296 | 10 | 19 | 41.946 | P | 0.200 | -0.445 |
| V05C | 2005 | 296 | 10 | 19 | 42.211 | P | 0.200 | 0.538  |
| SN16 | 2005 | 296 | 10 | 19 | 42.733 | P | 0.200 | 0.164  |
| S08C | 2005 | 296 | 10 | 19 | 42.804 | P | 0.200 | 0.361  |
| VES  | 2005 | 296 | 10 | 19 | 43.630 | P | 0.200 | -0.987 |
| SMM  | 2005 | 296 | 10 | 19 | 43.641 | P | 0.200 | 0.261  |
| TIN  | 2005 | 296 | 10 | 19 | 43.816 | P | 0.200 | 0.203  |
| SDP  | 2005 | 296 | 10 | 19 | 44.017 | P | 0.200 | -0.230 |
| MPP  | 2005 | 296 | 10 | 19 | 45.771 | P | 0.200 | 0.246  |
| CWC  | 2005 | 296 | 10 | 19 | 45.925 | P | 0.200 | -0.264 |
| ISA  | 2005 | 296 | 10 | 19 | 46.193 | P | 0.200 | -1.021 |
| GRA  | 2005 | 296 | 10 | 19 | 46.764 | P | 0.200 | 0.419  |
| ARV  | 2005 | 296 | 10 | 19 | 47.208 | P | 0.200 | -0.567 |
| SBC  | 2005 | 296 | 10 | 19 | 47.238 | P | 0.200 | 0.036  |
| SCZ2 | 2005 | 296 | 10 | 19 | 48.580 | P | 0.200 | -0.256 |
| MPM  | 2005 | 296 | 10 | 19 | 49.279 | P | 0.200 | -0.119 |
| LGU  | 2005 | 296 | 10 | 19 | 49.858 | P | 0.200 | -0.674 |
| OSI  | 2005 | 296 | 10 | 19 | 49.915 | P | 0.200 | -0.094 |
| FUR  | 2005 | 296 | 10 | 19 | 49.915 | P | 0.200 | 0.315  |
| TPNV | 2005 | 296 | 10 | 19 | 50.339 | P | 0.200 | 0.006  |
| LRL  | 2005 | 296 | 10 | 19 | 50.343 | P | 0.200 | -0.229 |
| EDW2 | 2005 | 296 | 10 | 19 | 51.425 | P | 0.200 | 0.059  |
| SNCC | 2005 | 296 | 10 | 19 | 51.617 | P | 0.200 | -0.265 |
| DEC  | 2005 | 296 | 10 | 19 | 51.897 | P | 0.200 | -0.547 |
| SHO  | 2005 | 296 | 10 | 19 | 53.547 | P | 0.200 | -0.054 |
| GSC  | 2005 | 296 | 10 | 19 | 53.812 | P | 0.200 | -0.123 |
| FMP  | 2005 | 296 | 10 | 19 | 53.868 | P | 0.200 | -0.294 |
| BFS  | 2005 | 296 | 10 | 19 | 54.202 | P | 0.200 | -0.569 |
| CIA  | 2005 | 296 | 10 | 19 | 54.348 | P | 0.200 | -0.654 |
| RRX  | 2005 | 296 | 10 | 19 | 54.773 | P | 0.200 | 0.148  |
| TUQ  | 2005 | 296 | 10 | 19 | 56.464 | P | 0.200 | 0.167  |
| BBR  | 2005 | 296 | 10 | 19 | 56.655 | P | 0.200 | -0.685 |

|      |      |     |    |         |          |            |         |        |     |        |
|------|------|-----|----|---------|----------|------------|---------|--------|-----|--------|
| HEC  | 2005 | 296 | 10 | 19      | 56.940   | P          | 0.200   | -0.118 |     |        |
| 2006 | 130  | 2   | 42 | 50.8757 | 52.51500 | -169.25600 | 18.0000 |        | 127 | -0.014 |
| J03A | 2006 | 130 | 2  | 49      | 15.154   | P          | 0.200   | 0.947  |     |        |
| HUMO | 2006 | 130 | 2  | 49      | 18.819   | P          | 0.200   | 0.871  |     |        |
| YBH  | 2006 | 130 | 2  | 49      | 24.748   | P          | 0.200   | 1.028  |     |        |
| M02C | 2006 | 130 | 2  | 49      | 25.662   | P          | 0.200   | 1.017  |     |        |
| N02C | 2006 | 130 | 2  | 49      | 25.798   | P          | 0.200   | 0.669  |     |        |
| M04C | 2006 | 130 | 2  | 49      | 28.613   | P          | 0.200   | 0.434  |     |        |
| M03C | 2006 | 130 | 2  | 49      | 29.692   | P          | 0.200   | 0.484  |     |        |
| WDC  | 2006 | 130 | 2  | 49      | 30.853   | P          | 0.200   | 0.449  |     |        |
| O02C | 2006 | 130 | 2  | 49      | 32.157   | P          | 0.200   | 0.820  |     |        |
| P01C | 2006 | 130 | 2  | 49      | 32.169   | P          | 0.200   | 0.120  |     |        |
| M05C | 2006 | 130 | 2  | 49      | 34.317   | P          | 0.200   | 0.341  |     |        |
| GASB | 2006 | 130 | 2  | 49      | 35.249   | P          | 0.200   | 0.692  |     |        |
| HATC | 2006 | 130 | 2  | 49      | 35.280   | P          | 0.200   | 0.233  |     |        |
| O03C | 2006 | 130 | 2  | 49      | 35.888   | P          | 0.200   | -0.289 |     |        |
| HOPS | 2006 | 130 | 2  | 49      | 36.074   | P          | 0.200   | -0.008 |     |        |
| M06C | 2006 | 130 | 2  | 49      | 38.722   | P          | 0.200   | 0.368  |     |        |
| O04C | 2006 | 130 | 2  | 49      | 40.021   | P          | 0.200   | 0.341  |     |        |
| ELFS | 2006 | 130 | 2  | 49      | 40.507   | P          | 0.200   | 0.544  |     |        |
| MNRC | 2006 | 130 | 2  | 49      | 40.595   | P          | 0.200   | 0.524  |     |        |
| SUTB | 2006 | 130 | 2  | 49      | 40.852   | P          | 0.200   | -0.681 |     |        |
| MCCM | 2006 | 130 | 2  | 49      | 41.008   | P          | 0.200   | -0.571 |     |        |
| ORV  | 2006 | 130 | 2  | 49      | 41.117   | P          | 0.200   | -0.205 |     |        |
| CVS  | 2006 | 130 | 2  | 49      | 42.461   | P          | 0.200   | -0.318 |     |        |
| O05C | 2006 | 130 | 2  | 49      | 42.624   | P          | 0.200   | 0.319  |     |        |
| FARB | 2006 | 130 | 2  | 49      | 42.895   | P          | 0.200   | -0.495 |     |        |
| Q03C | 2006 | 130 | 2  | 49      | 44.163   | P          | 0.200   | 0.653  |     |        |
| M07A | 2006 | 130 | 2  | 49      | 44.593   | P          | 0.200   | 0.326  |     |        |
| Q04C | 2006 | 130 | 2  | 49      | 45.533   | P          | 0.200   | -0.171 |     |        |
| BEK  | 2006 | 130 | 2  | 49      | 45.849   | P          | 0.200   | -0.065 |     |        |
| BRK  | 2006 | 130 | 2  | 49      | 45.927   | P          | 0.200   | -0.471 |     |        |
| BKS  | 2006 | 130 | 2  | 49      | 46.244   | P          | 0.200   | -0.239 |     |        |
| BRIB | 2006 | 130 | 2  | 49      | 46.446   | P          | 0.200   | -0.212 |     |        |
| O06A | 2006 | 130 | 2  | 49      | 47.219   | P          | 0.200   | 0.157  |     |        |
| P05C | 2006 | 130 | 2  | 49      | 47.571   | P          | 0.200   | 0.015  |     |        |
| BDM  | 2006 | 130 | 2  | 49      | 47.892   | P          | 0.200   | -0.104 |     |        |
| JRSC | 2006 | 130 | 2  | 49      | 48.389   | P          | 0.200   | -0.721 |     |        |
| N07B | 2006 | 130 | 2  | 49      | 48.575   | P          | 0.200   | 0.174  |     |        |
| LAVA | 2006 | 130 | 2  | 49      | 49.605   | P          | 0.200   | -0.036 |     |        |
| BNLO | 2006 | 130 | 2  | 49      | 50.345   | P          | 0.200   | -0.656 |     |        |
| WENL | 2006 | 130 | 2  | 49      | 50.380   | P          | 0.200   | -0.040 |     |        |
| R04C | 2006 | 130 | 2  | 49      | 50.969   | P          | 0.200   | -0.177 |     |        |
| O07A | 2006 | 130 | 2  | 49      | 52.192   | P          | 0.200   | 0.145  |     |        |
| WCN  | 2006 | 130 | 2  | 49      | 52.212   | P          | 0.200   | 0.175  |     |        |
| MHC  | 2006 | 130 | 2  | 49      | 52.471   | P          | 0.200   | -0.223 |     |        |
| N08A | 2006 | 130 | 2  | 49      | 53.028   | P          | 0.200   | 0.269  |     |        |
| S04C | 2006 | 130 | 2  | 49      | 53.099   | P          | 0.200   | -0.194 |     |        |
| P07A | 2006 | 130 | 2  | 49      | 55.264   | P          | 0.200   | 0.034  |     |        |
| CMB  | 2006 | 130 | 2  | 49      | 55.478   | P          | 0.200   | 0.171  |     |        |
| O08A | 2006 | 130 | 2  | 49      | 55.479   | P          | 0.200   | 0.280  |     |        |
| PACP | 2006 | 130 | 2  | 49      | 56.058   | P          | 0.200   | -0.258 |     |        |
| SAO  | 2006 | 130 | 2  | 49      | 56.490   | P          | 0.200   | -0.272 |     |        |
| SN85 | 2006 | 130 | 2  | 49      | 56.515   | P          | 0.200   | 0.034  |     |        |
| SN71 | 2006 | 130 | 2  | 49      | 57.026   | P          | 0.200   | -0.256 |     |        |
| SN73 | 2006 | 130 | 2  | 49      | 57.847   | P          | 0.200   | -0.155 |     |        |
| HAST | 2006 | 130 | 2  | 49      | 57.954   | P          | 0.200   | -0.390 |     |        |
| R06C | 2006 | 130 | 2  | 49      | 58.091   | P          | 0.200   | 0.321  |     |        |
| SN76 | 2006 | 130 | 2  | 49      | 58.728   | P          | 0.200   | 0.366  |     |        |
| Q07A | 2006 | 130 | 2  | 49      | 58.855   | P          | 0.200   | 0.126  |     |        |
| S05C | 2006 | 130 | 2  | 49      | 58.880   | P          | 0.200   | -0.443 |     |        |
| P08A | 2006 | 130 | 2  | 49      | 58.900   | P          | 0.200   | 0.328  |     |        |



|      |      |     |   |    |        |   |       |        |
|------|------|-----|---|----|--------|---|-------|--------|
| S06C | 2006 | 130 | 2 | 49 | 59.038 | P | 0.200 | -0.034 |
| BMN  | 2006 | 130 | 2 | 49 | 59.142 | P | 0.200 | -0.206 |
| SN62 | 2006 | 130 | 2 | 49 | 59.530 | P | 0.200 | -0.276 |
| T05C | 2006 | 130 | 2 | 50 | 0.193  | P | 0.200 | 0.177  |
| SN64 | 2006 | 130 | 2 | 50 | 0.419  | P | 0.200 | 0.031  |
| O09A | 2006 | 130 | 2 | 50 | 0.894  | P | 0.200 | 0.148  |
| SN67 | 2006 | 130 | 2 | 50 | 0.993  | P | 0.200 | 0.339  |
| SN51 | 2006 | 130 | 2 | 50 | 1.140  | P | 0.200 | -0.088 |
| V03C | 2006 | 130 | 2 | 50 | 1.840  | P | 0.200 | -0.117 |
| SN52 | 2006 | 130 | 2 | 50 | 1.851  | P | 0.200 | -0.205 |
| SN54 | 2006 | 130 | 2 | 50 | 1.864  | P | 0.200 | 0.125  |
| SN55 | 2006 | 130 | 2 | 50 | 2.213  | P | 0.200 | 0.269  |
| R07C | 2006 | 130 | 2 | 50 | 2.555  | P | 0.200 | 0.343  |
| SN57 | 2006 | 130 | 2 | 50 | 2.626  | P | 0.200 | 0.375  |
| U04C | 2006 | 130 | 2 | 50 | 2.646  | P | 0.200 | 0.144  |
| Q08A | 2006 | 130 | 2 | 50 | 3.839  | P | 0.200 | 0.047  |
| T06C | 2006 | 130 | 2 | 50 | 4.236  | P | 0.200 | -0.151 |
| SN44 | 2006 | 130 | 2 | 50 | 4.396  | P | 0.200 | 0.257  |
| SN48 | 2006 | 130 | 2 | 50 | 4.439  | P | 0.200 | 0.170  |
| P09A | 2006 | 130 | 2 | 50 | 4.498  | P | 0.200 | 0.211  |
| SN47 | 2006 | 130 | 2 | 50 | 4.828  | P | 0.200 | 0.390  |
| MNV  | 2006 | 130 | 2 | 50 | 4.918  | P | 0.200 | 0.040  |
| SN46 | 2006 | 130 | 2 | 50 | 5.250  | P | 0.200 | 0.562  |
| R08A | 2006 | 130 | 2 | 50 | 5.705  | P | 0.200 | 0.176  |
| PKD  | 2006 | 130 | 2 | 50 | 5.820  | P | 0.200 | -0.213 |
| SN21 | 2006 | 130 | 2 | 50 | 5.868  | P | 0.200 | -0.585 |
| U05C | 2006 | 130 | 2 | 50 | 5.990  | P | 0.200 | 0.101  |
| V04C | 2006 | 130 | 2 | 50 | 6.035  | P | 0.200 | 0.030  |
| SN38 | 2006 | 130 | 2 | 50 | 6.230  | P | 0.200 | 0.247  |
| SN37 | 2006 | 130 | 2 | 50 | 6.651  | P | 0.200 | 0.399  |
| SN11 | 2006 | 130 | 2 | 50 | 7.664  | P | 0.200 | -0.421 |
| Q09A | 2006 | 130 | 2 | 50 | 7.836  | P | 0.200 | 0.076  |
| SN28 | 2006 | 130 | 2 | 50 | 8.066  | P | 0.200 | 0.367  |
| SN26 | 2006 | 130 | 2 | 50 | 8.273  | P | 0.200 | 0.534  |
| SN25 | 2006 | 130 | 2 | 50 | 8.613  | P | 0.200 | 0.640  |
| SN15 | 2006 | 130 | 2 | 50 | 9.343  | P | 0.200 | 0.434  |
| HELL | 2006 | 130 | 2 | 50 | 9.498  | P | 0.200 | -0.353 |
| V05C | 2006 | 130 | 2 | 50 | 9.970  | P | 0.200 | 0.350  |
| RCT  | 2006 | 130 | 2 | 50 | 10.039 | P | 0.200 | -0.502 |
| S08C | 2006 | 130 | 2 | 50 | 10.636 | P | 0.200 | 0.615  |
| SN16 | 2006 | 130 | 2 | 50 | 10.713 | P | 0.200 | 0.486  |
| TPH  | 2006 | 130 | 2 | 50 | 11.300 | P | 0.200 | -0.377 |
| TIN  | 2006 | 130 | 2 | 50 | 12.251 | P | 0.200 | 0.341  |
| SMM  | 2006 | 130 | 2 | 50 | 12.401 | P | 0.200 | 0.010  |
| VES  | 2006 | 130 | 2 | 50 | 13.179 | P | 0.200 | -0.812 |
| S09A | 2006 | 130 | 2 | 50 | 13.415 | P | 0.200 | -0.095 |
| SDP  | 2006 | 130 | 2 | 50 | 13.790 | P | 0.200 | -0.297 |
| MPP  | 2006 | 130 | 2 | 50 | 15.831 | P | 0.200 | -0.016 |
| CWC  | 2006 | 130 | 2 | 50 | 16.274 | P | 0.200 | 0.213  |
| GRA  | 2006 | 130 | 2 | 50 | 16.771 | P | 0.200 | 0.293  |
| ISA  | 2006 | 130 | 2 | 50 | 17.669 | P | 0.200 | -0.450 |
| ARV  | 2006 | 130 | 2 | 50 | 18.610 | P | 0.200 | -0.669 |
| SBC  | 2006 | 130 | 2 | 50 | 18.671 | P | 0.200 | 0.005  |
| SCZ2 | 2006 | 130 | 2 | 50 | 20.862 | P | 0.200 | -0.732 |
| MPM  | 2006 | 130 | 2 | 50 | 21.172 | P | 0.200 | 0.030  |
| FUR  | 2006 | 130 | 2 | 50 | 21.801 | P | 0.200 | 0.021  |
| TPNV | 2006 | 130 | 2 | 50 | 22.294 | P | 0.200 | -0.327 |
| OSI  | 2006 | 130 | 2 | 50 | 22.580 | P | 0.200 | -0.199 |
| LRL  | 2006 | 130 | 2 | 50 | 22.890 | P | 0.200 | -0.410 |
| LGU  | 2006 | 130 | 2 | 50 | 23.026 | P | 0.200 | -0.844 |
| EDW2 | 2006 | 130 | 2 | 50 | 24.553 | P | 0.200 | -0.334 |
| SNCC | 2006 | 130 | 2 | 50 | 25.954 | P | 0.200 | -0.544 |
| DEC  | 2006 | 130 | 2 | 50 | 26.174 | P | 0.200 | -0.577 |

|     |      |     |   |    |        |   |       |        |
|-----|------|-----|---|----|--------|---|-------|--------|
| DJJ | 2006 | 130 | 2 | 50 | 26.399 | P | 0.200 | -0.488 |
| SHO | 2006 | 130 | 2 | 50 | 27.614 | P | 0.200 | -0.402 |
| CHF | 2006 | 130 | 2 | 50 | 27.616 | P | 0.200 | -0.351 |
| MWC | 2006 | 130 | 2 | 50 | 27.922 | P | 0.200 | -0.575 |
| GSC | 2006 | 130 | 2 | 50 | 28.335 | P | 0.200 | -0.290 |
| FMP | 2006 | 130 | 2 | 50 | 29.236 | P | 0.200 | -0.629 |
| RRX | 2006 | 130 | 2 | 50 | 29.790 | P | 0.200 | -0.146 |
| BFS | 2006 | 130 | 2 | 50 | 30.037 | P | 0.200 | -0.264 |
| CIA | 2006 | 130 | 2 | 50 | 30.206 | P | 0.200 | -0.955 |
| TUQ | 2006 | 130 | 2 | 50 | 32.070 | P | 0.200 | -0.316 |
| HEC | 2006 | 130 | 2 | 50 | 33.107 | P | 0.200 | -0.504 |
| BBR | 2006 | 130 | 2 | 50 | 33.689 | P | 0.200 | -0.360 |

|      |     |   |    |         |          |           |         |     |        |
|------|-----|---|----|---------|----------|-----------|---------|-----|--------|
| 2006 | 165 | 4 | 18 | 42.7951 | 51.75200 | 177.08200 | 14.0000 | 137 | -0.008 |
|------|-----|---|----|---------|----------|-----------|---------|-----|--------|

|      |      |     |   |    |        |   |       |        |
|------|------|-----|---|----|--------|---|-------|--------|
| I03A | 2006 | 165 | 4 | 26 | 14.628 | P | 0.200 | 0.204  |
| DBO  | 2006 | 165 | 4 | 26 | 19.064 | P | 0.200 | 0.377  |
| J03A | 2006 | 165 | 4 | 26 | 19.299 | P | 0.200 | 0.492  |
| K02A | 2006 | 165 | 4 | 26 | 19.516 | P | 0.200 | 0.512  |
| L02A | 2006 | 165 | 4 | 26 | 21.868 | P | 0.200 | 0.629  |
| HUMO | 2006 | 165 | 4 | 26 | 22.838 | P | 0.200 | 0.466  |
| K04A | 2006 | 165 | 4 | 26 | 28.627 | P | 0.200 | 0.023  |
| YBH  | 2006 | 165 | 4 | 26 | 28.651 | P | 0.200 | 0.830  |
| M02C | 2006 | 165 | 4 | 26 | 29.556 | P | 0.200 | 0.868  |
| N02C | 2006 | 165 | 4 | 26 | 29.734 | P | 0.200 | 0.616  |
| L04A | 2006 | 165 | 4 | 26 | 29.939 | P | 0.200 | 0.079  |
| O01C | 2006 | 165 | 4 | 26 | 30.823 | P | 0.200 | 1.053  |
| M04C | 2006 | 165 | 4 | 26 | 32.204 | P | 0.200 | 0.181  |
| M03C | 2006 | 165 | 4 | 26 | 33.173 | P | 0.200 | 0.185  |
| WDC  | 2006 | 165 | 4 | 26 | 34.483 | P | 0.200 | 0.408  |
| O02C | 2006 | 165 | 4 | 26 | 35.661 | P | 0.200 | 0.717  |
| P01C | 2006 | 165 | 4 | 26 | 35.893 | P | 0.200 | 0.375  |
| M05C | 2006 | 165 | 4 | 26 | 37.510 | P | 0.200 | 0.039  |
| HATC | 2006 | 165 | 4 | 26 | 38.508 | P | 0.200 | 0.032  |
| GASB | 2006 | 165 | 4 | 26 | 38.682 | P | 0.200 | 0.734  |
| O03C | 2006 | 165 | 4 | 26 | 39.207 | P | 0.200 | -0.295 |
| HOPS | 2006 | 165 | 4 | 26 | 39.377 | P | 0.200 | 0.076  |
| M06C | 2006 | 165 | 4 | 26 | 41.597 | P | 0.200 | 0.019  |
| O04C | 2006 | 165 | 4 | 26 | 42.916 | P | 0.200 | 0.094  |
| ELFS | 2006 | 165 | 4 | 26 | 43.385 | P | 0.200 | 0.304  |
| MNRC | 2006 | 165 | 4 | 26 | 43.733 | P | 0.200 | 0.660  |
| SUTB | 2006 | 165 | 4 | 26 | 43.752 | P | 0.200 | -0.733 |
| ORV  | 2006 | 165 | 4 | 26 | 43.761 | P | 0.200 | -0.561 |
| MCCM | 2006 | 165 | 4 | 26 | 44.080 | P | 0.200 | -0.277 |
| O05C | 2006 | 165 | 4 | 26 | 45.340 | P | 0.200 | 0.076  |
| CVS  | 2006 | 165 | 4 | 26 | 45.418 | P | 0.200 | -0.133 |
| FARB | 2006 | 165 | 4 | 26 | 45.734 | P | 0.200 | -0.251 |
| M07A | 2006 | 165 | 4 | 26 | 46.912 | P | 0.200 | -0.165 |
| Q03C | 2006 | 165 | 4 | 26 | 47.229 | P | 0.200 | 0.938  |
| Q04C | 2006 | 165 | 4 | 26 | 48.306 | P | 0.200 | -0.075 |
| BRK  | 2006 | 165 | 4 | 26 | 48.716 | P | 0.200 | -0.179 |
| BKS  | 2006 | 165 | 4 | 26 | 48.928 | P | 0.200 | -0.037 |
| BRIB | 2006 | 165 | 4 | 26 | 49.228 | P | 0.200 | 0.096  |
| O06A | 2006 | 165 | 4 | 26 | 49.601 | P | 0.200 | -0.131 |
| P05C | 2006 | 165 | 4 | 26 | 49.947 | P | 0.200 | -0.233 |
| N07B | 2006 | 165 | 4 | 26 | 50.703 | P | 0.200 | -0.267 |
| BDM  | 2006 | 165 | 4 | 26 | 50.815 | P | 0.200 | 0.394  |
| JRSC | 2006 | 165 | 4 | 26 | 50.999 | P | 0.200 | -0.376 |
| P06A | 2006 | 165 | 4 | 26 | 51.628 | P | 0.200 | -0.069 |
| LAVA | 2006 | 165 | 4 | 26 | 51.857 | P | 0.200 | -0.236 |
| BNLO | 2006 | 165 | 4 | 26 | 52.656 | P | 0.200 | -0.451 |
| WENL | 2006 | 165 | 4 | 26 | 52.721 | P | 0.200 | 0.064  |
| R04C | 2006 | 165 | 4 | 26 | 53.220 | P | 0.200 | -0.209 |
| O07A | 2006 | 165 | 4 | 26 | 54.248 | P | 0.200 | -0.141 |

|      |      |     |   |    |        |   |       |        |
|------|------|-----|---|----|--------|---|-------|--------|
| MHC  | 2006 | 165 | 4 | 26 | 54.751 | P | 0.200 | -0.028 |
| N08A | 2006 | 165 | 4 | 26 | 54.854 | P | 0.200 | -0.175 |
| S04C | 2006 | 165 | 4 | 26 | 55.373 | P | 0.200 | -0.006 |
| R05C | 2006 | 165 | 4 | 26 | 55.817 | P | 0.200 | -0.010 |
| P07A | 2006 | 165 | 4 | 26 | 57.319 | P | 0.200 | -0.074 |
| CMB  | 2006 | 165 | 4 | 26 | 57.424 | P | 0.200 | 0.071  |
| SN84 | 2006 | 165 | 4 | 26 | 57.839 | P | 0.200 | -0.315 |
| PACP | 2006 | 165 | 4 | 26 | 58.236 | P | 0.200 | 0.086  |
| SAO  | 2006 | 165 | 4 | 26 | 58.440 | P | 0.200 | -0.078 |
| SN85 | 2006 | 165 | 4 | 26 | 58.538 | P | 0.200 | 0.029  |
| SN71 | 2006 | 165 | 4 | 26 | 58.906 | P | 0.200 | -0.269 |
| SN73 | 2006 | 165 | 4 | 26 | 59.722 | P | 0.200 | -0.152 |
| R06C | 2006 | 165 | 4 | 26 | 59.853 | P | 0.200 | 0.119  |
| HAST | 2006 | 165 | 4 | 26 | 59.892 | P | 0.200 | -0.051 |
| SN76 | 2006 | 165 | 4 | 27 | 0.597  | P | 0.200 | 0.316  |
| S05C | 2006 | 165 | 4 | 27 | 0.657  | P | 0.200 | -0.389 |
| Q07A | 2006 | 165 | 4 | 27 | 0.668  | P | 0.200 | 0.043  |
| P08A | 2006 | 165 | 4 | 27 | 0.676  | P | 0.200 | 0.180  |
| S06C | 2006 | 165 | 4 | 27 | 0.760  | P | 0.200 | -0.132 |
| SN64 | 2006 | 165 | 4 | 27 | 2.124  | P | 0.200 | -0.017 |
| T05C | 2006 | 165 | 4 | 27 | 2.205  | P | 0.200 | 0.576  |
| SN66 | 2006 | 165 | 4 | 27 | 2.238  | P | 0.200 | 0.138  |
| O09A | 2006 | 165 | 4 | 27 | 2.445  | P | 0.200 | -0.023 |
| SN67 | 2006 | 165 | 4 | 27 | 2.564  | P | 0.200 | 0.152  |
| SN51 | 2006 | 165 | 4 | 27 | 2.847  | P | 0.200 | 0.033  |
| SN52 | 2006 | 165 | 4 | 27 | 3.328  | P | 0.200 | -0.292 |
| SN54 | 2006 | 165 | 4 | 27 | 3.473  | P | 0.200 | 0.075  |
| V03C | 2006 | 165 | 4 | 27 | 3.564  | P | 0.200 | 0.295  |
| SN55 | 2006 | 165 | 4 | 27 | 3.727  | P | 0.200 | 0.138  |
| R07C | 2006 | 165 | 4 | 27 | 4.067  | P | 0.200 | 0.190  |
| SN57 | 2006 | 165 | 4 | 27 | 4.134  | P | 0.200 | 0.242  |
| U04C | 2006 | 165 | 4 | 27 | 4.279  | P | 0.200 | 0.409  |
| Q08A | 2006 | 165 | 4 | 27 | 5.127  | P | 0.200 | -0.246 |
| T06C | 2006 | 165 | 4 | 27 | 5.632  | P | 0.200 | -0.147 |
| P09A | 2006 | 165 | 4 | 27 | 5.691  | P | 0.200 | -0.123 |
| SN44 | 2006 | 165 | 4 | 27 | 5.783  | P | 0.200 | 0.160  |
| SN48 | 2006 | 165 | 4 | 27 | 5.877  | P | 0.200 | 0.061  |
| SN47 | 2006 | 165 | 4 | 27 | 6.145  | P | 0.200 | 0.190  |
| MNV  | 2006 | 165 | 4 | 27 | 6.223  | P | 0.200 | -0.153 |
| R08A | 2006 | 165 | 4 | 27 | 6.913  | P | 0.200 | -0.052 |
| PKD  | 2006 | 165 | 4 | 27 | 7.082  | P | 0.200 | -0.068 |
| SN21 | 2006 | 165 | 4 | 27 | 7.222  | P | 0.200 | -0.491 |
| SN22 | 2006 | 165 | 4 | 27 | 7.352  | P | 0.200 | -0.272 |
| V04C | 2006 | 165 | 4 | 27 | 7.470  | P | 0.200 | 0.437  |
| SN38 | 2006 | 165 | 4 | 27 | 7.504  | P | 0.200 | 0.110  |
| U05C | 2006 | 165 | 4 | 27 | 7.735  | P | 0.200 | 0.661  |
| SN37 | 2006 | 165 | 4 | 27 | 7.843  | P | 0.200 | 0.200  |
| SN36 | 2006 | 165 | 4 | 27 | 8.122  | P | 0.200 | 0.330  |
| SN11 | 2006 | 165 | 4 | 27 | 8.655  | P | 0.200 | -0.560 |
| Q09A | 2006 | 165 | 4 | 27 | 9.054  | P | 0.200 | -0.011 |
| SN25 | 2006 | 165 | 4 | 27 | 9.264  | P | 0.200 | 0.029  |
| SN28 | 2006 | 165 | 4 | 27 | 9.315  | P | 0.200 | 0.326  |
| SN26 | 2006 | 165 | 4 | 27 | 9.346  | P | 0.200 | 0.342  |
| PHL  | 2006 | 165 | 4 | 27 | 10.065 | P | 0.200 | 0.296  |
| SN15 | 2006 | 165 | 4 | 27 | 10.327 | P | 0.200 | 0.225  |
| RCT  | 2006 | 165 | 4 | 27 | 11.027 | P | 0.200 | -0.433 |
| V05C | 2006 | 165 | 4 | 27 | 11.127 | P | 0.200 | 0.605  |
| S08C | 2006 | 165 | 4 | 27 | 11.378 | P | 0.200 | 0.215  |
| SN16 | 2006 | 165 | 4 | 27 | 11.619 | P | 0.200 | 0.279  |
| TPH  | 2006 | 165 | 4 | 27 | 12.255 | P | 0.200 | -0.475 |
| TIN  | 2006 | 165 | 4 | 27 | 13.074 | P | 0.200 | 0.184  |
| SMM  | 2006 | 165 | 4 | 27 | 13.403 | P | 0.200 | 0.363  |
| VES  | 2006 | 165 | 4 | 27 | 13.950 | P | 0.200 | -0.710 |

|      |      |     |   |    |        |   |       |        |
|------|------|-----|---|----|--------|---|-------|--------|
| S09A | 2006 | 165 | 4 | 27 | 14.136 | P | 0.200 | -0.287 |
| SDP  | 2006 | 165 | 4 | 27 | 14.618 | P | 0.200 | 0.142  |
| Q11A | 2006 | 165 | 4 | 27 | 15.955 | P | 0.200 | -0.397 |
| MPP  | 2006 | 165 | 4 | 27 | 16.516 | P | 0.200 | 0.286  |
| CWC  | 2006 | 165 | 4 | 27 | 16.681 | P | 0.200 | -0.041 |
| GRA  | 2006 | 165 | 4 | 27 | 17.394 | P | 0.200 | 0.251  |
| ISA  | 2006 | 165 | 4 | 27 | 17.833 | P | 0.200 | -0.709 |
| ARV  | 2006 | 165 | 4 | 27 | 18.961 | P | 0.200 | -0.572 |
| SBC  | 2006 | 165 | 4 | 27 | 19.045 | P | 0.200 | 0.233  |
| SCZ2 | 2006 | 165 | 4 | 27 | 21.126 | P | 0.200 | -0.338 |
| MPM  | 2006 | 165 | 4 | 27 | 21.327 | P | 0.200 | -0.135 |
| FUR  | 2006 | 165 | 4 | 27 | 21.988 | P | 0.200 | -0.061 |
| TPNV | 2006 | 165 | 4 | 27 | 22.528 | P | 0.200 | -0.384 |
| OSI  | 2006 | 165 | 4 | 27 | 22.593 | P | 0.200 | -0.162 |
| LRL  | 2006 | 165 | 4 | 27 | 22.787 | P | 0.200 | -0.612 |
| LGU  | 2006 | 165 | 4 | 27 | 23.162 | P | 0.200 | -0.515 |
| EDW2 | 2006 | 165 | 4 | 27 | 24.501 | P | 0.200 | -0.282 |
| SNCC | 2006 | 165 | 4 | 27 | 25.829 | P | 0.200 | -0.121 |
| DJJ  | 2006 | 165 | 4 | 27 | 25.929 | P | 0.200 | -0.591 |
| DEC  | 2006 | 165 | 4 | 27 | 25.998 | P | 0.200 | -0.440 |
| PAS  | 2006 | 165 | 4 | 27 | 27.159 | P | 0.200 | -0.558 |
| SHO  | 2006 | 165 | 4 | 27 | 27.416 | P | 0.200 | -0.450 |
| MWC  | 2006 | 165 | 4 | 27 | 27.658 | P | 0.200 | -0.440 |
| GSC  | 2006 | 165 | 4 | 27 | 28.086 | P | 0.200 | -0.284 |
| FMP  | 2006 | 165 | 4 | 27 | 28.818 | P | 0.200 | -0.420 |
| RRX  | 2006 | 165 | 4 | 27 | 29.399 | P | 0.200 | -0.141 |
| BFS  | 2006 | 165 | 4 | 27 | 29.522 | P | 0.200 | -0.270 |
| CIA  | 2006 | 165 | 4 | 27 | 29.852 | P | 0.200 | -0.560 |
| TUQ  | 2006 | 165 | 4 | 27 | 31.455 | P | 0.200 | -0.451 |
| HEC  | 2006 | 165 | 4 | 27 | 32.594 | P | 0.200 | -0.397 |
| BBR  | 2006 | 165 | 4 | 27 | 32.978 | P | 0.200 | -0.367 |

|      |      |     |    |         |          |           |         |        |        |
|------|------|-----|----|---------|----------|-----------|---------|--------|--------|
| 2006 | 173  | 10  | 53 | 12.5996 | 45.41700 | 149.34300 | 95.0000 | 141    | -0.006 |
| I03A | 2006 | 173 | 11 | 3       | 3.012    | P         | 0.200   | 0.795  |        |
| J02A | 2006 | 173 | 11 | 3       | 4.209    | P         | 0.200   | 0.704  |        |
| DBO  | 2006 | 173 | 11 | 3       | 6.600    | P         | 0.200   | 0.658  |        |
| K02A | 2006 | 173 | 11 | 3       | 6.796    | P         | 0.200   | 0.577  |        |
| L02A | 2006 | 173 | 11 | 3       | 8.728    | P         | 0.200   | 0.558  |        |
| HUMO | 2006 | 173 | 11 | 3       | 9.675    | P         | 0.200   | 0.647  |        |
| YBH  | 2006 | 173 | 11 | 3       | 14.303   | P         | 0.200   | 0.720  |        |
| K04A | 2006 | 173 | 11 | 3       | 14.387   | P         | 0.200   | 0.302  |        |
| N02C | 2006 | 173 | 11 | 3       | 15.172   | P         | 0.200   | 0.426  |        |
| M02C | 2006 | 173 | 11 | 3       | 15.335   | P         | 0.200   | 0.992  |        |
| L04A | 2006 | 173 | 11 | 3       | 15.555   | P         | 0.200   | 0.367  |        |
| O01C | 2006 | 173 | 11 | 3       | 16.294   | P         | 0.200   | 1.003  |        |
| M04C | 2006 | 173 | 11 | 3       | 17.399   | P         | 0.200   | 0.330  |        |
| M03C | 2006 | 173 | 11 | 3       | 18.156   | P         | 0.200   | 0.226  |        |
| WDC  | 2006 | 173 | 11 | 3       | 19.002   | P         | 0.200   | 0.177  |        |
| O02C | 2006 | 173 | 11 | 3       | 20.170   | P         | 0.200   | 0.544  |        |
| L05A | 2006 | 173 | 11 | 3       | 20.682   | P         | 0.200   | 0.569  |        |
| M05C | 2006 | 173 | 11 | 3       | 21.767   | P         | 0.200   | 0.177  |        |
| HATC | 2006 | 173 | 11 | 3       | 22.748   | P         | 0.200   | 0.287  |        |
| GASB | 2006 | 173 | 11 | 3       | 22.787   | P         | 0.200   | 0.671  |        |
| O03C | 2006 | 173 | 11 | 3       | 23.054   | P         | 0.200   | -0.292 |        |
| HOPS | 2006 | 173 | 11 | 3       | 23.102   | P         | 0.200   | -0.103 |        |
| M06C | 2006 | 173 | 11 | 3       | 25.278   | P         | 0.200   | 0.342  |        |
| O04C | 2006 | 173 | 11 | 3       | 26.332   | P         | 0.200   | 0.272  |        |
| ORV  | 2006 | 173 | 11 | 3       | 26.622   | P         | 0.200   | -0.727 |        |
| L07A | 2006 | 173 | 11 | 3       | 26.625   | P         | 0.200   | 0.384  |        |
| ELFS | 2006 | 173 | 11 | 3       | 26.660   | P         | 0.200   | 0.436  |        |
| SUTB | 2006 | 173 | 11 | 3       | 26.784   | P         | 0.200   | -0.678 |        |
| MNRC | 2006 | 173 | 11 | 3       | 26.821   | P         | 0.200   | 0.478  |        |
| O05C | 2006 | 173 | 11 | 3       | 28.120   | P         | 0.200   | 0.067  |        |

|      |      |     |    |   |        |   |       |        |
|------|------|-----|----|---|--------|---|-------|--------|
| FARB | 2006 | 173 | 11 | 3 | 28.280 | P | 0.200 | -0.292 |
| M07A | 2006 | 173 | 11 | 3 | 29.659 | P | 0.200 | 0.338  |
| Q03C | 2006 | 173 | 11 | 3 | 29.880 | P | 0.200 | 0.939  |
| BEK  | 2006 | 173 | 11 | 3 | 30.507 | P | 0.200 | -0.440 |
| Q04C | 2006 | 173 | 11 | 3 | 30.693 | P | 0.200 | 0.045  |
| BRK  | 2006 | 173 | 11 | 3 | 30.771 | P | 0.200 | -0.297 |
| BKS  | 2006 | 173 | 11 | 3 | 30.915 | P | 0.200 | -0.176 |
| BRIB | 2006 | 173 | 11 | 3 | 31.135 | P | 0.200 | -0.081 |
| O06A | 2006 | 173 | 11 | 3 | 31.759 | P | 0.200 | 0.054  |
| P05C | 2006 | 173 | 11 | 3 | 31.960 | P | 0.200 | -0.217 |
| BDM  | 2006 | 173 | 11 | 3 | 32.216 | P | 0.200 | -0.116 |
| N07B | 2006 | 173 | 11 | 3 | 32.733 | P | 0.200 | 0.103  |
| LAVA | 2006 | 173 | 11 | 3 | 33.417 | P | 0.200 | -0.345 |
| P06A | 2006 | 173 | 11 | 3 | 33.565 | P | 0.200 | 0.221  |
| BNLO | 2006 | 173 | 11 | 3 | 33.970 | P | 0.200 | -0.500 |
| WENL | 2006 | 173 | 11 | 3 | 34.067 | P | 0.200 | -0.095 |
| R04C | 2006 | 173 | 11 | 3 | 34.409 | P | 0.200 | -0.378 |
| O07A | 2006 | 173 | 11 | 3 | 35.732 | P | 0.200 | 0.216  |
| WCN  | 2006 | 173 | 11 | 3 | 35.773 | P | 0.200 | 0.160  |
| MHC  | 2006 | 173 | 11 | 3 | 35.833 | P | 0.200 | -0.114 |
| N08A | 2006 | 173 | 11 | 3 | 36.052 | P | 0.200 | 0.125  |
| S04C | 2006 | 173 | 11 | 3 | 36.299 | P | 0.200 | -0.159 |
| R05C | 2006 | 173 | 11 | 3 | 36.750 | P | 0.200 | -0.089 |
| CMB  | 2006 | 173 | 11 | 3 | 37.989 | P | 0.200 | -0.053 |
| O08A | 2006 | 173 | 11 | 3 | 38.231 | P | 0.200 | 0.389  |
| P07A | 2006 | 173 | 11 | 3 | 38.281 | P | 0.200 | 0.201  |
| SN84 | 2006 | 173 | 11 | 3 | 38.354 | P | 0.200 | -0.405 |
| SAO  | 2006 | 173 | 11 | 3 | 38.547 | P | 0.200 | -0.376 |
| PACP | 2006 | 173 | 11 | 3 | 38.650 | P | 0.200 | -0.007 |
| SN71 | 2006 | 173 | 11 | 3 | 38.878 | P | 0.200 | -0.680 |
| SN85 | 2006 | 173 | 11 | 3 | 38.900 | P | 0.200 | -0.158 |
| SN73 | 2006 | 173 | 11 | 3 | 39.709 | P | 0.200 | -0.428 |
| HAST | 2006 | 173 | 11 | 3 | 39.760 | P | 0.200 | -0.320 |
| R06C | 2006 | 173 | 11 | 3 | 40.230 | P | 0.200 | 0.182  |
| S05C | 2006 | 173 | 11 | 3 | 40.389 | P | 0.200 | -0.688 |
| S06C | 2006 | 173 | 11 | 3 | 40.721 | P | 0.200 | -0.282 |
| SN76 | 2006 | 173 | 11 | 3 | 40.840 | P | 0.200 | 0.321  |
| Q07A | 2006 | 173 | 11 | 3 | 40.969 | P | 0.200 | 0.284  |
| P08A | 2006 | 173 | 11 | 3 | 41.268 | P | 0.200 | 0.734  |
| SN64 | 2006 | 173 | 11 | 3 | 41.845 | P | 0.200 | -0.239 |
| T05C | 2006 | 173 | 11 | 3 | 41.850 | P | 0.200 | 0.308  |
| SN66 | 2006 | 173 | 11 | 3 | 42.120 | P | 0.200 | 0.077  |
| SN51 | 2006 | 173 | 11 | 3 | 42.462 | P | 0.200 | -0.036 |
| O09A | 2006 | 173 | 11 | 3 | 42.465 | P | 0.200 | 0.487  |
| SN67 | 2006 | 173 | 11 | 3 | 42.466 | P | 0.200 | 0.224  |
| SN52 | 2006 | 173 | 11 | 3 | 42.618 | P | 0.200 | -0.575 |
| V03C | 2006 | 173 | 11 | 3 | 42.904 | P | 0.200 | 0.158  |
| SN54 | 2006 | 173 | 11 | 3 | 43.011 | P | 0.200 | -0.101 |
| SN55 | 2006 | 173 | 11 | 3 | 43.237 | P | 0.200 | -0.008 |
| U04C | 2006 | 173 | 11 | 3 | 43.542 | P | 0.200 | 0.217  |
| R07C | 2006 | 173 | 11 | 3 | 43.660 | P | 0.200 | 0.151  |
| SN56 | 2006 | 173 | 11 | 3 | 43.748 | P | 0.200 | 0.133  |
| SN57 | 2006 | 173 | 11 | 3 | 43.804 | P | 0.200 | 0.368  |
| SN43 | 2006 | 173 | 11 | 3 | 44.248 | P | 0.200 | -0.325 |
| Q08A | 2006 | 173 | 11 | 3 | 44.622 | P | 0.200 | -0.009 |
| T06C | 2006 | 173 | 11 | 3 | 44.669 | P | 0.200 | -0.312 |
| SN44 | 2006 | 173 | 11 | 3 | 44.806 | P | 0.200 | -0.087 |
| SN48 | 2006 | 173 | 11 | 3 | 45.207 | P | 0.200 | 0.140  |
| SN47 | 2006 | 173 | 11 | 3 | 45.412 | P | 0.200 | 0.206  |
| MNV  | 2006 | 173 | 11 | 3 | 45.515 | P | 0.200 | 0.044  |
| PKD  | 2006 | 173 | 11 | 3 | 45.680 | P | 0.200 | -0.331 |
| SN46 | 2006 | 173 | 11 | 3 | 45.688 | P | 0.200 | 0.305  |
| SN21 | 2006 | 173 | 11 | 3 | 45.916 | P | 0.200 | -0.643 |

|      |      |     |    |   |        |   |       |        |
|------|------|-----|----|---|--------|---|-------|--------|
| R08A | 2006 | 173 | 11 | 3 | 46.092 | P | 0.200 | 0.193  |
| V04C | 2006 | 173 | 11 | 3 | 46.121 | P | 0.200 | 0.301  |
| SN34 | 2006 | 173 | 11 | 3 | 46.163 | P | 0.200 | -0.176 |
| SN23 | 2006 | 173 | 11 | 3 | 46.411 | P | 0.200 | -0.368 |
| U05C | 2006 | 173 | 11 | 3 | 46.474 | P | 0.200 | 0.540  |
| SN38 | 2006 | 173 | 11 | 3 | 46.549 | P | 0.200 | 0.239  |
| SN37 | 2006 | 173 | 11 | 3 | 46.706 | P | 0.200 | 0.153  |
| SN36 | 2006 | 173 | 11 | 3 | 46.856 | P | 0.200 | 0.213  |
| SN24 | 2006 | 173 | 11 | 3 | 46.975 | P | 0.200 | -0.082 |
| SN11 | 2006 | 173 | 11 | 3 | 47.013 | P | 0.200 | -0.713 |
| Q09A | 2006 | 173 | 11 | 3 | 47.741 | P | 0.200 | 0.190  |
| SN25 | 2006 | 173 | 11 | 3 | 47.809 | P | 0.200 | -0.057 |
| SN26 | 2006 | 173 | 11 | 3 | 47.890 | P | 0.200 | 0.285  |
| SN28 | 2006 | 173 | 11 | 3 | 47.952 | P | 0.200 | 0.364  |
| PHL  | 2006 | 173 | 11 | 3 | 48.120 | P | 0.200 | 0.070  |
| SN15 | 2006 | 173 | 11 | 3 | 48.756 | P | 0.200 | 0.181  |
| RCT  | 2006 | 173 | 11 | 3 | 49.002 | P | 0.200 | -0.549 |
| V05C | 2006 | 173 | 11 | 3 | 49.172 | P | 0.200 | 0.434  |
| SN16 | 2006 | 173 | 11 | 3 | 49.662 | P | 0.200 | 0.079  |
| S08C | 2006 | 173 | 11 | 3 | 49.680 | P | 0.200 | 0.248  |
| R09A | 2006 | 173 | 11 | 3 | 50.311 | P | 0.200 | -0.179 |
| TIN  | 2006 | 173 | 11 | 3 | 50.978 | P | 0.200 | 0.121  |
| SMM  | 2006 | 173 | 11 | 3 | 51.017 | P | 0.200 | 0.218  |
| VES  | 2006 | 173 | 11 | 3 | 51.340 | P | 0.200 | -0.870 |
| S09A | 2006 | 173 | 11 | 3 | 51.941 | P | 0.200 | -0.103 |
| Q11A | 2006 | 173 | 11 | 3 | 53.286 | P | 0.200 | -0.195 |
| MPP  | 2006 | 173 | 11 | 3 | 53.544 | P | 0.200 | 0.150  |
| CWC  | 2006 | 173 | 11 | 3 | 53.739 | P | 0.200 | -0.252 |
| ISA  | 2006 | 173 | 11 | 3 | 54.335 | P | 0.200 | -1.029 |
| GRA  | 2006 | 173 | 11 | 3 | 54.437 | P | 0.200 | 0.197  |
| SBC  | 2006 | 173 | 11 | 3 | 55.376 | P | 0.200 | -0.081 |
| ARV  | 2006 | 173 | 11 | 3 | 55.429 | P | 0.200 | -0.684 |
| SCZ2 | 2006 | 173 | 11 | 3 | 57.171 | P | 0.200 | -0.369 |
| MPM  | 2006 | 173 | 11 | 3 | 57.616 | P | 0.200 | -0.261 |
| FUR  | 2006 | 173 | 11 | 3 | 58.309 | P | 0.200 | 0.078  |
| LGU  | 2006 | 173 | 11 | 3 | 58.724 | P | 0.200 | -0.756 |
| TPNV | 2006 | 173 | 11 | 3 | 58.885 | P | 0.200 | -0.119 |
| LRL  | 2006 | 173 | 11 | 3 | 58.940 | P | 0.200 | -0.449 |
| EDW2 | 2006 | 173 | 11 | 4 | 0.378  | P | 0.200 | -0.063 |
| SNCC | 2006 | 173 | 11 | 4 | 0.829  | P | 0.200 | -0.374 |
| U10A | 2006 | 173 | 11 | 4 | 0.906  | P | 0.200 | 0.322  |
| DJJ  | 2006 | 173 | 11 | 4 | 1.147  | P | 0.200 | -0.639 |
| DEC  | 2006 | 173 | 11 | 4 | 1.219  | P | 0.200 | -0.544 |
| PAS  | 2006 | 173 | 11 | 4 | 2.189  | P | 0.200 | -0.622 |
| CHF  | 2006 | 173 | 11 | 4 | 2.400  | P | 0.200 | -0.320 |
| MWC  | 2006 | 173 | 11 | 4 | 2.673  | P | 0.200 | -0.496 |
| SHO  | 2006 | 173 | 11 | 4 | 2.751  | P | 0.200 | -0.268 |
| GSC  | 2006 | 173 | 11 | 4 | 3.119  | P | 0.200 | -0.316 |
| FMP  | 2006 | 173 | 11 | 4 | 3.544  | P | 0.200 | -0.388 |
| BFS  | 2006 | 173 | 11 | 4 | 3.973  | P | 0.200 | -0.565 |
| CIA  | 2006 | 173 | 11 | 4 | 4.245  | P | 0.200 | -0.670 |
| RRX  | 2006 | 173 | 11 | 4 | 4.281  | P | 0.200 | -0.061 |
| U11A | 2006 | 173 | 11 | 4 | 4.595  | P | 0.200 | 0.370  |
| TUQ  | 2006 | 173 | 11 | 4 | 6.150  | P | 0.200 | -0.159 |
| V11A | 2006 | 173 | 11 | 4 | 6.571  | P | 0.200 | -0.041 |
| HEC  | 2006 | 173 | 11 | 4 | 6.968  | P | 0.200 | -0.255 |
| BBR  | 2006 | 173 | 11 | 4 | 6.989  | P | 0.200 | -0.552 |

|      |      |     |    |         |          |           |         |       |        |
|------|------|-----|----|---------|----------|-----------|---------|-------|--------|
| 2006 | 321  | 6   | 33 | 50.2866 | 47.01700 | 155.52600 | 10.0000 | 242   | -0.016 |
| I03A | 2006 | 321 | 6  | 43      | 18.585   | P         | 0.200   | 0.633 |        |
| J02A | 2006 | 321 | 6  | 43      | 19.968   | P         | 0.200   | 0.742 |        |
| K02A | 2006 | 321 | 6  | 43      | 22.646   | P         | 0.200   | 0.600 |        |
| I04A | 2006 | 321 | 6  | 43      | 22.666   | P         | 0.200   | 0.087 |        |

|      |      |     |   |    |        |   |       |        |
|------|------|-----|---|----|--------|---|-------|--------|
| J03A | 2006 | 321 | 6 | 43 | 22.752 | P | 0.200 | 0.925  |
| L02A | 2006 | 321 | 6 | 43 | 24.574 | P | 0.200 | 0.550  |
| J04A | 2006 | 321 | 6 | 43 | 26.790 | P | 0.200 | 0.426  |
| J05A | 2006 | 321 | 6 | 43 | 30.554 | P | 0.200 | 0.788  |
| YBH  | 2006 | 321 | 6 | 43 | 30.633 | P | 0.200 | 0.881  |
| K04A | 2006 | 321 | 6 | 43 | 30.862 | P | 0.200 | 0.473  |
| N02C | 2006 | 321 | 6 | 43 | 31.423 | P | 0.200 | 0.555  |
| M02C | 2006 | 321 | 6 | 43 | 31.573 | P | 0.200 | 1.061  |
| L04A | 2006 | 321 | 6 | 43 | 31.941 | P | 0.200 | 0.432  |
| O01C | 2006 | 321 | 6 | 43 | 32.566 | P | 0.200 | 1.184  |
| M04C | 2006 | 321 | 6 | 43 | 33.848 | P | 0.200 | 0.415  |
| K05A | 2006 | 321 | 6 | 43 | 34.477 | P | 0.200 | 0.891  |
| M03C | 2006 | 321 | 6 | 43 | 34.549 | P | 0.200 | 0.261  |
| WDC  | 2006 | 321 | 6 | 43 | 35.585 | P | 0.200 | 0.403  |
| O02C | 2006 | 321 | 6 | 43 | 36.649 | P | 0.200 | 0.673  |
| L05A | 2006 | 321 | 6 | 43 | 37.408 | P | 0.200 | 0.703  |
| M05C | 2006 | 321 | 6 | 43 | 38.501 | P | 0.200 | 0.312  |
| GASB | 2006 | 321 | 6 | 43 | 39.315 | P | 0.200 | 0.746  |
| HATC | 2006 | 321 | 6 | 43 | 39.424 | P | 0.200 | 0.365  |
| SNG5 | 2006 | 321 | 6 | 43 | 42.864 | P | 0.200 | -0.426 |
| M06C | 2006 | 321 | 6 | 43 | 42.156 | P | 0.200 | 0.416  |
| O04C | 2006 | 321 | 6 | 43 | 43.176 | P | 0.200 | 0.343  |
| ORV  | 2006 | 321 | 6 | 43 | 43.475 | P | 0.200 | -0.641 |
| MNRC | 2006 | 321 | 6 | 43 | 43.493 | P | 0.200 | 0.513  |
| ELFS | 2006 | 321 | 6 | 43 | 43.503 | P | 0.200 | 0.453  |
| SUTB | 2006 | 321 | 6 | 43 | 43.666 | P | 0.200 | -0.547 |
| L07A | 2006 | 321 | 6 | 43 | 43.695 | P | 0.200 | 0.460  |
| SNF6 | 2006 | 321 | 6 | 43 | 45.149 | P | 0.200 | -0.309 |
| SNE4 | 2006 | 321 | 6 | 43 | 45.835 | P | 0.200 | -0.135 |
| CVS  | 2006 | 321 | 6 | 43 | 44.889 | P | 0.200 | -0.165 |
| FARB | 2006 | 321 | 6 | 43 | 45.016 | P | 0.200 | -0.265 |
| SNE5 | 2006 | 321 | 6 | 43 | 46.155 | P | 0.200 | -0.247 |
| O05C | 2006 | 321 | 6 | 43 | 45.160 | P | 0.200 | 0.240  |
| SNE7 | 2006 | 321 | 6 | 43 | 46.452 | P | 0.200 | -0.099 |
| SNE6 | 2006 | 321 | 6 | 43 | 46.866 | P | 0.200 | -0.550 |
| N06A | 2006 | 321 | 6 | 43 | 46.555 | P | 0.200 | 0.174  |
| SND7 | 2006 | 321 | 6 | 43 | 47.701 | P | 0.200 | -0.224 |
| Q03C | 2006 | 321 | 6 | 43 | 46.751 | P | 0.200 | 1.019  |
| M07A | 2006 | 321 | 6 | 43 | 46.802 | P | 0.200 | 0.351  |
| SND5 | 2006 | 321 | 6 | 43 | 47.903 | P | 0.200 | -0.252 |
| Q04C | 2006 | 321 | 6 | 43 | 47.491 | P | 0.200 | -0.082 |
| SND4 | 2006 | 321 | 6 | 43 | 47.492 | P | 0.200 | -0.243 |
| BRK  | 2006 | 321 | 6 | 43 | 47.561 | P | 0.200 | -0.357 |
| BEK  | 2006 | 321 | 6 | 43 | 47.605 | P | 0.200 | -0.350 |
| BKS  | 2006 | 321 | 6 | 43 | 47.910 | P | 0.200 | -0.052 |
| SND8 | 2006 | 321 | 6 | 43 | 49.143 | P | 0.200 | -0.245 |
| SNC4 | 2006 | 321 | 6 | 43 | 49.191 | P | 0.200 | -0.325 |
| SNC5 | 2006 | 321 | 6 | 43 | 49.323 | P | 0.200 | -0.254 |
| BRIB | 2006 | 321 | 6 | 43 | 48.494 | P | 0.200 | 0.396  |
| O06A | 2006 | 321 | 6 | 43 | 48.900 | P | 0.200 | 0.069  |
| SNC7 | 2006 | 321 | 6 | 43 | 50.119 | P | 0.200 | -0.086 |
| P05C | 2006 | 321 | 6 | 43 | 49.230 | P | 0.200 | 0.006  |
| BDM  | 2006 | 321 | 6 | 43 | 49.440 | P | 0.200 | 0.159  |
| SNC3 | 2006 | 321 | 6 | 43 | 49.500 | P | 0.200 | 0.567  |
| JRSC | 2006 | 321 | 6 | 43 | 49.613 | P | 0.200 | -0.423 |
| SNB3 | 2006 | 321 | 6 | 43 | 50.632 | P | 0.200 | 0.117  |
| N07B | 2006 | 321 | 6 | 43 | 49.959 | P | 0.200 | 0.072  |
| SNB5 | 2006 | 321 | 6 | 43 | 51.238 | P | 0.200 | -0.168 |
| LAVA | 2006 | 321 | 6 | 43 | 50.541 | P | 0.200 | -0.327 |
| P06A | 2006 | 321 | 6 | 43 | 50.710 | P | 0.200 | 0.181  |
| WENL | 2006 | 321 | 6 | 43 | 51.077 | P | 0.200 | -0.127 |
| BNLO | 2006 | 321 | 6 | 43 | 51.115 | P | 0.200 | -0.382 |
| SNB7 | 2006 | 321 | 6 | 43 | 52.331 | P | 0.200 | -0.008 |

|      |      |     |   |    |        |   |       |        |
|------|------|-----|---|----|--------|---|-------|--------|
| R04C | 2006 | 321 | 6 | 43 | 51.616 | P | 0.200 | -0.322 |
| SNA4 | 2006 | 321 | 6 | 43 | 52.646 | P | 0.200 | -0.173 |
| SNA3 | 2006 | 321 | 6 | 43 | 52.708 | P | 0.200 | 0.217  |
| SNA7 | 2006 | 321 | 6 | 43 | 53.721 | P | 0.200 | 0.181  |
| MHC  | 2006 | 321 | 6 | 43 | 52.972 | P | 0.200 | -0.086 |
| WCN  | 2006 | 321 | 6 | 43 | 53.012 | P | 0.200 | 0.124  |
| O07A | 2006 | 321 | 6 | 43 | 53.020 | P | 0.200 | 0.131  |
| S04C | 2006 | 321 | 6 | 43 | 53.537 | P | 0.200 | -0.075 |
| SNA8 | 2006 | 321 | 6 | 43 | 54.538 | P | 0.200 | 0.062  |
| N08A | 2006 | 321 | 6 | 43 | 53.596 | P | 0.200 | 0.193  |
| SN97 | 2006 | 321 | 6 | 43 | 54.847 | P | 0.200 | 0.066  |
| R05C | 2006 | 321 | 6 | 43 | 54.052 | P | 0.200 | -0.074 |
| SN93 | 2006 | 321 | 6 | 43 | 54.385 | P | 0.200 | 0.539  |
| SN96 | 2006 | 321 | 6 | 43 | 55.313 | P | 0.200 | 0.071  |
| CMB  | 2006 | 321 | 6 | 43 | 55.423 | P | 0.200 | 0.057  |
| O08A | 2006 | 321 | 6 | 43 | 55.738 | P | 0.200 | 0.340  |
| PACP | 2006 | 321 | 6 | 43 | 55.938 | P | 0.200 | 0.008  |
| SAO  | 2006 | 321 | 6 | 43 | 55.940 | P | 0.200 | -0.258 |
| HAST | 2006 | 321 | 6 | 43 | 57.048 | P | 0.200 | -0.352 |
| R06C | 2006 | 321 | 6 | 43 | 57.720 | P | 0.200 | 0.197  |
| S05C | 2006 | 321 | 6 | 43 | 57.957 | P | 0.200 | -0.569 |
| S06C | 2006 | 321 | 6 | 43 | 58.167 | P | 0.200 | -0.312 |
| Q07A | 2006 | 321 | 6 | 43 | 58.359 | P | 0.200 | 0.092  |
| P08A | 2006 | 321 | 6 | 43 | 58.780 | P | 0.200 | 0.606  |
| BMN  | 2006 | 321 | 6 | 43 | 58.800 | P | 0.200 | 0.105  |
| T05C | 2006 | 321 | 6 | 43 | 59.412 | P | 0.200 | 0.432  |
| O09A | 2006 | 321 | 6 | 44 | 0.241  | P | 0.200 | 0.444  |
| SN43 | 2006 | 321 | 6 | 44 | 1.917  | P | 0.200 | -0.296 |
| U04C | 2006 | 321 | 6 | 44 | 0.976  | P | 0.200 | 0.137  |
| R07C | 2006 | 321 | 6 | 44 | 1.326  | P | 0.200 | 0.184  |
| T06C | 2006 | 321 | 6 | 44 | 2.303  | P | 0.200 | -0.339 |
| Q08A | 2006 | 321 | 6 | 44 | 2.400  | P | 0.200 | -0.032 |
| P09A | 2006 | 321 | 6 | 44 | 3.029  | P | 0.200 | 0.256  |
| PKD  | 2006 | 321 | 6 | 44 | 3.503  | P | 0.200 | -0.161 |
| RAMR | 2006 | 321 | 6 | 44 | 3.723  | P | 0.200 | 0.270  |
| R08A | 2006 | 321 | 6 | 44 | 4.006  | P | 0.200 | 0.247  |
| U05C | 2006 | 321 | 6 | 44 | 4.078  | P | 0.200 | 0.448  |
| P10A | 2006 | 321 | 6 | 44 | 5.356  | P | 0.200 | 0.054  |
| Q09A | 2006 | 321 | 6 | 44 | 5.717  | P | 0.200 | 0.141  |
| PHL  | 2006 | 321 | 6 | 44 | 5.896  | P | 0.200 | 0.081  |
| HELL | 2006 | 321 | 6 | 44 | 6.406  | P | 0.200 | -0.671 |
| RCT  | 2006 | 321 | 6 | 44 | 6.881  | P | 0.200 | -0.591 |
| V05C | 2006 | 321 | 6 | 44 | 6.919  | P | 0.200 | 0.344  |
| S08C | 2006 | 321 | 6 | 44 | 7.619  | P | 0.200 | 0.205  |
| R09A | 2006 | 321 | 6 | 44 | 8.459  | P | 0.200 | -0.179 |
| TPH  | 2006 | 321 | 6 | 44 | 8.542  | P | 0.200 | -0.241 |
| SMM  | 2006 | 321 | 6 | 44 | 8.797  | P | 0.200 | 0.084  |
| TIN  | 2006 | 321 | 6 | 44 | 8.928  | P | 0.200 | 0.043  |
| VES  | 2006 | 321 | 6 | 44 | 9.195  | P | 0.200 | -1.050 |
| S09A | 2006 | 321 | 6 | 44 | 10.134 | P | 0.200 | -0.094 |
| MPP  | 2006 | 321 | 6 | 44 | 11.453 | P | 0.200 | 0.011  |
| Q11A | 2006 | 321 | 6 | 44 | 11.607 | P | 0.200 | -0.270 |
| CWC  | 2006 | 321 | 6 | 44 | 11.937 | P | 0.200 | -0.226 |
| ISA  | 2006 | 321 | 6 | 44 | 12.427 | P | 0.200 | -1.166 |
| GRA  | 2006 | 321 | 6 | 44 | 12.818 | P | 0.200 | 0.309  |
| ARV  | 2006 | 321 | 6 | 44 | 13.585 | P | 0.200 | -0.772 |
| SCZ2 | 2006 | 321 | 6 | 44 | 15.257 | P | 0.200 | -0.540 |
| MPM  | 2006 | 321 | 6 | 44 | 15.983 | P | 0.200 | -0.276 |
| FUR  | 2006 | 321 | 6 | 44 | 16.662 | P | 0.200 | -0.048 |
| OSI  | 2006 | 321 | 6 | 44 | 16.987 | P | 0.200 | -0.139 |
| LGU  | 2006 | 321 | 6 | 44 | 17.126 | P | 0.200 | -0.703 |
| LRL  | 2006 | 321 | 6 | 44 | 17.366 | P | 0.200 | -0.463 |
| SLA  | 2006 | 321 | 6 | 44 | 17.452 | P | 0.200 | -0.285 |



|      |      |     |   |    |        |   |       |        |
|------|------|-----|---|----|--------|---|-------|--------|
| TOV  | 2006 | 321 | 6 | 44 | 18.002 | P | 0.200 | -0.606 |
| EDW2 | 2006 | 321 | 6 | 44 | 18.791 | P | 0.200 | -0.125 |
| U10A | 2006 | 321 | 6 | 44 | 19.503 | P | 0.200 | 0.308  |
| DEC  | 2006 | 321 | 6 | 44 | 19.672 | P | 0.200 | -0.604 |
| DJJ  | 2006 | 321 | 6 | 44 | 19.699 | P | 0.200 | -0.602 |
| VCS  | 2006 | 321 | 6 | 44 | 20.184 | P | 0.200 | -0.065 |
| PASC | 2006 | 321 | 6 | 44 | 20.695 | P | 0.200 | -0.467 |
| CHF  | 2006 | 321 | 6 | 44 | 20.963 | P | 0.200 | -0.343 |
| MWC  | 2006 | 321 | 6 | 44 | 21.250 | P | 0.200 | -0.516 |
| SHO  | 2006 | 321 | 6 | 44 | 21.405 | P | 0.200 | -0.347 |
| RPV  | 2006 | 321 | 6 | 44 | 21.522 | P | 0.200 | -0.631 |
| GSC  | 2006 | 321 | 6 | 44 | 21.849 | P | 0.200 | -0.289 |
| FMP  | 2006 | 321 | 6 | 44 | 22.266 | P | 0.200 | -0.317 |
| ADO  | 2006 | 321 | 6 | 44 | 22.736 | P | 0.200 | -0.130 |
| BFS  | 2006 | 321 | 6 | 44 | 22.746 | P | 0.200 | -0.487 |
| VTV  | 2006 | 321 | 6 | 44 | 22.874 | P | 0.200 | -0.245 |
| RRX  | 2006 | 321 | 6 | 44 | 22.945 | P | 0.200 | -0.140 |
| CIA  | 2006 | 321 | 6 | 44 | 23.052 | P | 0.200 | -0.538 |
| U11A | 2006 | 321 | 6 | 44 | 23.133 | P | 0.200 | 0.038  |
| TUQ  | 2006 | 321 | 6 | 44 | 24.879 | P | 0.200 | -0.341 |
| V11A | 2006 | 321 | 6 | 44 | 25.402 | P | 0.200 | -0.167 |
| SVD  | 2006 | 321 | 6 | 44 | 25.580 | P | 0.200 | -0.535 |
| HEC  | 2006 | 321 | 6 | 44 | 25.756 | P | 0.200 | -0.377 |
| SDD  | 2006 | 321 | 6 | 44 | 25.783 | P | 0.200 | -0.175 |
| BBR  | 2006 | 321 | 6 | 44 | 25.841 | P | 0.200 | -0.566 |

|      |    |    |    |        |          |           |         |     |       |
|------|----|----|----|--------|----------|-----------|---------|-----|-------|
| 2007 | 99 | 10 | 18 | 4.6011 | 48.30400 | 154.69501 | 36.0000 | 322 | 0.012 |
|------|----|----|----|--------|----------|-----------|---------|-----|-------|

|      |      |    |    |    |        |   |       |        |
|------|------|----|----|----|--------|---|-------|--------|
| J03A | 2007 | 99 | 10 | 27 | 32.337 | P | 0.200 | 0.751  |
| I04A | 2007 | 99 | 10 | 27 | 32.427 | P | 0.200 | 0.212  |
| K02A | 2007 | 99 | 10 | 27 | 32.687 | P | 0.200 | 0.731  |
| L02A | 2007 | 99 | 10 | 27 | 34.782 | P | 0.200 | 0.719  |
| HUMO | 2007 | 99 | 10 | 27 | 35.551 | P | 0.200 | 0.657  |
| J04A | 2007 | 99 | 10 | 27 | 36.522 | P | 0.200 | 0.451  |
| J05A | 2007 | 99 | 10 | 27 | 40.200 | P | 0.200 | 0.810  |
| YBH  | 2007 | 99 | 10 | 27 | 40.579 | P | 0.200 | 0.813  |
| K04A | 2007 | 99 | 10 | 27 | 40.717 | P | 0.200 | 0.545  |
| N02C | 2007 | 99 | 10 | 27 | 41.580 | P | 0.200 | 0.473  |
| M02C | 2007 | 99 | 10 | 27 | 41.590 | P | 0.200 | 0.986  |
| L04A | 2007 | 99 | 10 | 27 | 41.836 | P | 0.200 | 0.461  |
| M04C | 2007 | 99 | 10 | 27 | 43.854 | P | 0.200 | 0.477  |
| M03C | 2007 | 99 | 10 | 27 | 44.716 | P | 0.200 | 0.376  |
| WDC  | 2007 | 99 | 10 | 27 | 45.757 | P | 0.200 | 0.371  |
| O02C | 2007 | 99 | 10 | 27 | 46.862 | P | 0.200 | 0.597  |
| M05C | 2007 | 99 | 10 | 27 | 48.512 | P | 0.200 | 0.377  |
| HATC | 2007 | 99 | 10 | 27 | 49.554 | P | 0.200 | 0.439  |
| GASB | 2007 | 99 | 10 | 27 | 49.605 | P | 0.200 | 0.677  |
| M06C | 2007 | 99 | 10 | 27 | 52.079 | P | 0.200 | 0.435  |
| SNG5 | 2007 | 99 | 10 | 27 | 52.976 | P | 0.200 | -0.543 |
| O04C | 2007 | 99 | 10 | 27 | 53.300 | P | 0.200 | 0.372  |
| L07A | 2007 | 99 | 10 | 27 | 53.582 | P | 0.200 | 0.689  |
| ELFS | 2007 | 99 | 10 | 27 | 53.595 | P | 0.200 | 0.535  |
| SNG7 | 2007 | 99 | 10 | 27 | 53.659 | P | 0.200 | 0.132  |
| ORV  | 2007 | 99 | 10 | 27 | 53.660 | P | 0.200 | -0.705 |
| SUTB | 2007 | 99 | 10 | 27 | 53.880 | P | 0.200 | -0.664 |
| MNRC | 2007 | 99 | 10 | 27 | 53.928 | P | 0.200 | 0.499  |
| SNF6 | 2007 | 99 | 10 | 27 | 55.275 | P | 0.200 | -0.375 |
| O05C | 2007 | 99 | 10 | 27 | 55.275 | P | 0.200 | 0.220  |
| CVS  | 2007 | 99 | 10 | 27 | 55.310 | P | 0.200 | -0.281 |
| FARB | 2007 | 99 | 10 | 27 | 55.692 | P | 0.200 | -0.282 |
| SNE4 | 2007 | 99 | 10 | 27 | 56.105 | P | 0.200 | -0.153 |
| SNF8 | 2007 | 99 | 10 | 27 | 56.166 | P | 0.200 | -0.069 |
| SNF9 | 2007 | 99 | 10 | 27 | 56.291 | P | 0.200 | -0.062 |
| SNE5 | 2007 | 99 | 10 | 27 | 56.384 | P | 0.200 | -0.271 |

|      |      |    |    |    |        |   |       |        |
|------|------|----|----|----|--------|---|-------|--------|
| N06A | 2007 | 99 | 10 | 27 | 56.441 | P | 0.200 | 0.153  |
| SNE7 | 2007 | 99 | 10 | 27 | 56.671 | P | 0.200 | -0.020 |
| M07A | 2007 | 99 | 10 | 27 | 56.676 | P | 0.200 | 0.490  |
| SNE6 | 2007 | 99 | 10 | 27 | 57.049 | P | 0.200 | -0.574 |
| Q03C | 2007 | 99 | 10 | 27 | 57.182 | P | 0.200 | 1.002  |
| SND4 | 2007 | 99 | 10 | 27 | 57.726 | P | 0.200 | -0.316 |
| BEK  | 2007 | 99 | 10 | 27 | 57.780 | P | 0.200 | -0.279 |
| Q04C | 2007 | 99 | 10 | 27 | 57.826 | P | 0.200 | -0.104 |
| SND7 | 2007 | 99 | 10 | 27 | 57.934 | P | 0.200 | -0.151 |
| SNE9 | 2007 | 99 | 10 | 27 | 57.997 | P | 0.200 | -0.046 |
| SND5 | 2007 | 99 | 10 | 27 | 58.089 | P | 0.200 | -0.327 |
| BRK  | 2007 | 99 | 10 | 27 | 58.233 | P | 0.200 | -0.284 |
| O06A | 2007 | 99 | 10 | 27 | 58.927 | P | 0.200 | 0.101  |
| SND8 | 2007 | 99 | 10 | 27 | 59.338 | P | 0.200 | -0.161 |
| P05C | 2007 | 99 | 10 | 27 | 59.367 | P | 0.200 | -0.068 |
| SNC4 | 2007 | 99 | 10 | 27 | 59.481 | P | 0.200 | -0.347 |
| SNC5 | 2007 | 99 | 10 | 27 | 59.567 | P | 0.200 | -0.264 |
| SNC3 | 2007 | 99 | 10 | 27 | 59.687 | P | 0.200 | 0.399  |
| SND9 | 2007 | 99 | 10 | 27 | 59.811 | P | 0.200 | 0.141  |
| BDM  | 2007 | 99 | 10 | 27 | 59.859 | P | 0.200 | 0.040  |
| N07B | 2007 | 99 | 10 | 27 | 59.860 | P | 0.200 | 0.156  |
| SNC7 | 2007 | 99 | 10 | 28 | 0.232  | P | 0.200 | -0.149 |
| P06A | 2007 | 99 | 10 | 28 | 0.870  | P | 0.200 | 0.265  |
| LAVA | 2007 | 99 | 10 | 28 | 0.875  | P | 0.200 | -0.287 |
| SNB3 | 2007 | 99 | 10 | 28 | 0.921  | P | 0.200 | 0.047  |
| SNC6 | 2007 | 99 | 10 | 28 | 1.001  | P | 0.200 | -0.039 |
| BNLO | 2007 | 99 | 10 | 28 | 1.590  | P | 0.200 | -0.599 |
| WENL | 2007 | 99 | 10 | 28 | 1.786  | P | 0.200 | 0.008  |
| R04C | 2007 | 99 | 10 | 28 | 1.995  | P | 0.200 | -0.337 |
| SNB6 | 2007 | 99 | 10 | 28 | 2.840  | P | 0.200 | 0.042  |
| SNA4 | 2007 | 99 | 10 | 28 | 2.948  | P | 0.200 | -0.196 |
| SNA3 | 2007 | 99 | 10 | 28 | 2.996  | P | 0.200 | 0.145  |
| WCN  | 2007 | 99 | 10 | 28 | 3.216  | P | 0.200 | 0.204  |
| SNA5 | 2007 | 99 | 10 | 28 | 3.354  | P | 0.200 | -0.269 |
| N08A | 2007 | 99 | 10 | 28 | 3.469  | P | 0.200 | 0.324  |
| MHC  | 2007 | 99 | 10 | 28 | 3.510  | P | 0.200 | -0.157 |
| SNB9 | 2007 | 99 | 10 | 28 | 3.643  | P | 0.200 | 0.248  |
| SNA7 | 2007 | 99 | 10 | 28 | 3.933  | P | 0.200 | 0.208  |
| S04C | 2007 | 99 | 10 | 28 | 3.969  | P | 0.200 | -0.200 |
| R05C | 2007 | 99 | 10 | 28 | 4.278  | P | 0.200 | -0.096 |
| SNA8 | 2007 | 99 | 10 | 28 | 4.708  | P | 0.200 | 0.098  |
| SN93 | 2007 | 99 | 10 | 28 | 4.747  | P | 0.200 | 0.519  |
| SN95 | 2007 | 99 | 10 | 28 | 5.071  | P | 0.200 | -0.069 |
| SN97 | 2007 | 99 | 10 | 28 | 5.080  | P | 0.200 | 0.101  |
| SN96 | 2007 | 99 | 10 | 28 | 5.571  | P | 0.200 | 0.047  |
| CMB  | 2007 | 99 | 10 | 28 | 5.730  | P | 0.200 | -0.011 |
| O08A | 2007 | 99 | 10 | 28 | 5.739  | P | 0.200 | 0.525  |
| P07A | 2007 | 99 | 10 | 28 | 5.791  | P | 0.200 | 0.257  |
| SN84 | 2007 | 99 | 10 | 28 | 6.094  | P | 0.200 | -0.360 |
| SAO  | 2007 | 99 | 10 | 28 | 6.444  | P | 0.200 | -0.425 |
| PACP | 2007 | 99 | 10 | 28 | 6.489  | P | 0.200 | -0.061 |
| SN85 | 2007 | 99 | 10 | 28 | 6.569  | P | 0.200 | -0.175 |
| SN74 | 2007 | 99 | 10 | 28 | 7.791  | P | 0.200 | -0.265 |
| R06C | 2007 | 99 | 10 | 28 | 8.012  | P | 0.200 | 0.279  |
| S05C | 2007 | 99 | 10 | 28 | 8.360  | P | 0.200 | -0.641 |
| SN75 | 2007 | 99 | 10 | 28 | 8.545  | P | 0.200 | -0.053 |
| Q07A | 2007 | 99 | 10 | 28 | 8.626  | P | 0.200 | 0.271  |
| P08A | 2007 | 99 | 10 | 28 | 8.765  | P | 0.200 | 0.684  |
| SN63 | 2007 | 99 | 10 | 28 | 9.521  | P | 0.200 | -0.317 |
| SN64 | 2007 | 99 | 10 | 28 | 9.804  | P | 0.200 | -0.133 |
| SN65 | 2007 | 99 | 10 | 28 | 9.814  | P | 0.200 | -0.128 |
| T05C | 2007 | 99 | 10 | 28 | 9.966  | P | 0.200 | 0.408  |
| O09A | 2007 | 99 | 10 | 28 | 10.120 | P | 0.200 | 0.570  |

|      |      |    |    |    |        |   |       |        |
|------|------|----|----|----|--------|---|-------|--------|
| SN55 | 2007 | 99 | 10 | 28 | 11.190 | P | 0.200 | 0.038  |
| R07C | 2007 | 99 | 10 | 28 | 11.592 | P | 0.200 | 0.212  |
| U04C | 2007 | 99 | 10 | 28 | 11.668 | P | 0.200 | 0.166  |
| SN43 | 2007 | 99 | 10 | 28 | 12.275 | P | 0.200 | -0.312 |
| Q08A | 2007 | 99 | 10 | 28 | 12.494 | P | 0.200 | 0.049  |
| T06C | 2007 | 99 | 10 | 28 | 12.792 | P | 0.200 | -0.303 |
| P09A | 2007 | 99 | 10 | 28 | 12.897 | P | 0.200 | 0.296  |
| PKD  | 2007 | 99 | 10 | 28 | 13.980 | P | 0.200 | -0.359 |
| R08A | 2007 | 99 | 10 | 28 | 14.142 | P | 0.200 | 0.295  |
| SN34 | 2007 | 99 | 10 | 28 | 14.312 | P | 0.200 | -0.106 |
| V04C | 2007 | 99 | 10 | 28 | 14.377 | P | 0.200 | 0.166  |
| U05C | 2007 | 99 | 10 | 28 | 14.706 | P | 0.200 | 0.499  |
| MLAC | 2007 | 99 | 10 | 28 | 14.786 | P | 0.200 | 0.530  |
| P10A | 2007 | 99 | 10 | 28 | 15.300 | P | 0.200 | 0.243  |
| Q09A | 2007 | 99 | 10 | 28 | 15.794 | P | 0.200 | 0.286  |
| SN12 | 2007 | 99 | 10 | 28 | 16.023 | P | 0.200 | -0.442 |
| PHL  | 2007 | 99 | 10 | 28 | 16.598 | P | 0.200 | 0.026  |
| SN14 | 2007 | 99 | 10 | 28 | 16.609 | P | 0.200 | -0.122 |
| HELL | 2007 | 99 | 10 | 28 | 16.822 | P | 0.200 | -0.679 |
| V05C | 2007 | 99 | 10 | 28 | 17.640 | P | 0.200 | 0.435  |
| S08C | 2007 | 99 | 10 | 28 | 17.934 | P | 0.200 | 0.293  |
| R09A | 2007 | 99 | 10 | 28 | 18.511 | P | 0.200 | -0.136 |
| Q10A | 2007 | 99 | 10 | 28 | 18.768 | P | 0.200 | 0.043  |
| TIN  | 2007 | 99 | 10 | 28 | 19.263 | P | 0.200 | 0.075  |
| SMM  | 2007 | 99 | 10 | 28 | 19.504 | P | 0.200 | 0.068  |
| VES  | 2007 | 99 | 10 | 28 | 19.886 | P | 0.200 | -0.905 |
| S09A | 2007 | 99 | 10 | 28 | 20.224 | P | 0.200 | -0.111 |
| R10A | 2007 | 99 | 10 | 28 | 21.477 | P | 0.200 | -0.099 |
| Q11A | 2007 | 99 | 10 | 28 | 21.588 | P | 0.200 | -0.093 |
| S10A | 2007 | 99 | 10 | 28 | 21.875 | P | 0.200 | -0.116 |
| MPP  | 2007 | 99 | 10 | 28 | 22.250 | P | 0.200 | 0.055  |
| CWC  | 2007 | 99 | 10 | 28 | 22.293 | P | 0.200 | -0.237 |
| BAK  | 2007 | 99 | 10 | 28 | 22.406 | P | 0.200 | -0.456 |
| GRA  | 2007 | 99 | 10 | 28 | 23.075 | P | 0.200 | 0.353  |
| ISA  | 2007 | 99 | 10 | 28 | 23.079 | P | 0.200 | -1.019 |
| R11A | 2007 | 99 | 10 | 28 | 23.906 | P | 0.200 | -0.132 |
| ARV  | 2007 | 99 | 10 | 28 | 24.147 | P | 0.200 | -0.829 |
| MPM  | 2007 | 99 | 10 | 28 | 26.381 | P | 0.200 | -0.238 |
| S11A | 2007 | 99 | 10 | 28 | 26.682 | P | 0.200 | 0.128  |
| FUR  | 2007 | 99 | 10 | 28 | 27.042 | P | 0.200 | 0.083  |
| OSI  | 2007 | 99 | 10 | 28 | 27.556 | P | 0.200 | -0.268 |
| TPNV | 2007 | 99 | 10 | 28 | 27.564 | P | 0.200 | -0.110 |
| LGU  | 2007 | 99 | 10 | 28 | 27.848 | P | 0.200 | -0.785 |
| LRL  | 2007 | 99 | 10 | 28 | 27.862 | P | 0.200 | -0.438 |
| EDW2 | 2007 | 99 | 10 | 28 | 29.349 | P | 0.200 | -0.151 |
| U10A | 2007 | 99 | 10 | 28 | 29.737 | P | 0.200 | 0.328  |
| T11A | 2007 | 99 | 10 | 28 | 30.299 | P | 0.200 | -0.021 |
| DEC  | 2007 | 99 | 10 | 28 | 30.398 | P | 0.200 | -0.582 |
| DJJ  | 2007 | 99 | 10 | 28 | 30.407 | P | 0.200 | -0.626 |
| VCS  | 2007 | 99 | 10 | 28 | 30.857 | P | 0.200 | -0.037 |
| PASC | 2007 | 99 | 10 | 28 | 31.267 | P | 0.200 | -0.592 |
| CHF  | 2007 | 99 | 10 | 28 | 31.646 | P | 0.200 | -0.319 |
| SHO  | 2007 | 99 | 10 | 28 | 31.704 | P | 0.200 | -0.315 |
| MWC  | 2007 | 99 | 10 | 28 | 31.901 | P | 0.200 | -0.537 |
| GSC  | 2007 | 99 | 10 | 28 | 32.280 | P | 0.200 | -0.258 |
| BFS  | 2007 | 99 | 10 | 28 | 33.354 | P | 0.200 | -0.511 |
| U11A | 2007 | 99 | 10 | 28 | 33.375 | P | 0.200 | 0.166  |
| ADO  | 2007 | 99 | 10 | 28 | 33.380 | P | 0.200 | -0.052 |
| RRX  | 2007 | 99 | 10 | 28 | 33.402 | P | 0.200 | -0.156 |
| VTV  | 2007 | 99 | 10 | 28 | 33.456 | P | 0.200 | -0.217 |
| CIA  | 2007 | 99 | 10 | 28 | 33.747 | P | 0.200 | -0.656 |
| TUQ  | 2007 | 99 | 10 | 28 | 35.254 | P | 0.200 | -0.261 |
| V11A | 2007 | 99 | 10 | 28 | 35.676 | P | 0.200 | -0.083 |

|      |      |     |    |         |          |            |          |        |     |       |
|------|------|-----|----|---------|----------|------------|----------|--------|-----|-------|
| SVD  | 2007 | 99  | 10 | 28      | 36.147   | P          | 0.200    | -0.557 |     |       |
| HEC  | 2007 | 99  | 10 | 28      | 36.252   | P          | 0.200    | -0.290 |     |       |
| BBR  | 2007 | 99  | 10 | 28      | 36.420   | P          | 0.200    | -0.534 |     |       |
| 1988 | 258  | 13  | 13 | 55.8273 | 51.89800 | -167.86700 | 48.0000  |        | 446 | 0.000 |
| arc  | 1988 | 258 | 13 | 21      | 11.000   | P          | 0.200    | 0.015  |     |       |
| bmd  | 1988 | 258 | 13 | 21      | 11.550   | P          | 0.200    | -0.221 |     |       |
| ccr  | 1988 | 258 | 13 | 21      | 5.620    | P          | 0.200    | 0.094  |     |       |
| jhn  | 1988 | 258 | 13 | 21      | 9.900    | P          | 0.200    | -0.154 |     |       |
| mnk  | 1988 | 258 | 13 | 21      | 7.270    | P          | 0.200    | 0.120  |     |       |
| pmt  | 1988 | 258 | 13 | 21      | 11.480   | P          | 0.200    | -0.151 |     |       |
| CLC  | 1988 | 258 | 13 | 21      | 15.510   | P          | 0.200    | -0.174 |     |       |
| TOW  | 1988 | 258 | 13 | 21      | 15.040   | P          | 0.200    | 0.210  |     |       |
| WCS  | 1988 | 258 | 13 | 21      | 13.880   | P          | 0.200    | 0.186  |     |       |
| WVP  | 1988 | 258 | 13 | 21      | 13.940   | P          | 0.200    | 0.076  |     |       |
| 1988 | 265  | 9   | 58 | 52.2019 | 46.15800 | 152.19400  | 27.0000  |        | 451 | 0.000 |
| bkr  | 1988 | 265 | 10 | 9       | 28.020   | P          | 0.200    | -0.464 |     |       |
| ccr  | 1988 | 265 | 10 | 9       | 24.560   | P          | 0.200    | 0.271  |     |       |
| jhn  | 1988 | 265 | 10 | 9       | 27.500   | P          | 0.200    | -0.261 |     |       |
| mnk  | 1988 | 265 | 10 | 9       | 25.840   | P          | 0.200    | 0.303  |     |       |
| pmt  | 1988 | 265 | 10 | 9       | 29.050   | P          | 0.200    | 0.038  |     |       |
| WMD  | 1988 | 265 | 10 | 9       | 26.930   | P          | 0.200    | 0.104  |     |       |
| cou  | 1988 | 265 | 10 | 9       | 27.560   | P          | 0.200    | 0.321  |     |       |
| ARV  | 1988 | 265 | 10 | 9       | 29.020   | P          | 0.200    | -0.840 |     |       |
| CAL  | 1988 | 265 | 10 | 9       | 33.860   | P          | 0.200    | 0.262  |     |       |
| CLC  | 1988 | 265 | 10 | 9       | 32.290   | P          | 0.200    | 0.092  |     |       |
| DTP  | 1988 | 265 | 10 | 9       | 33.490   | P          | 0.200    | 0.042  |     |       |
| ISA  | 1988 | 265 | 10 | 9       | 29.090   | P          | 0.200    | -0.011 |     |       |
| JAW  | 1988 | 265 | 10 | 9       | 32.110   | P          | 0.200    | -0.265 |     |       |
| JFS  | 1988 | 265 | 10 | 9       | 34.050   | P          | 0.200    | 0.260  |     |       |
| LRM  | 1988 | 265 | 10 | 9       | 33.190   | P          | 0.200    | -0.025 |     |       |
| SBK  | 1988 | 265 | 10 | 9       | 35.550   | P          | 0.200    | 0.248  |     |       |
| SRT  | 1988 | 265 | 10 | 9       | 32.250   | P          | 0.200    | 0.166  |     |       |
| TEJ  | 1988 | 265 | 10 | 9       | 30.000   | P          | 0.200    | -0.094 |     |       |
| TJR  | 1988 | 265 | 10 | 9       | 30.350   | P          | 0.200    | -0.425 |     |       |
| TOW  | 1988 | 265 | 10 | 9       | 31.930   | P          | 0.200    | 0.417  |     |       |
| WBM  | 1988 | 265 | 10 | 9       | 31.610   | P          | 0.200    | -0.291 |     |       |
| WBS  | 1988 | 265 | 10 | 9       | 30.610   | P          | 0.200    | -0.566 |     |       |
| WCS  | 1988 | 265 | 10 | 9       | 31.050   | P          | 0.200    | 0.401  |     |       |
| WOF  | 1988 | 265 | 10 | 9       | 28.240   | P          | 0.200    | -0.624 |     |       |
| WRC  | 1988 | 265 | 10 | 9       | 31.660   | P          | 0.200    | 0.285  |     |       |
| WSC  | 1988 | 265 | 10 | 9       | 31.160   | P          | 0.200    | -0.314 |     |       |
| WSH  | 1988 | 265 | 10 | 9       | 33.500   | P          | 0.200    | 0.280  |     |       |
| WVP  | 1988 | 265 | 10 | 9       | 31.030   | P          | 0.200    | 0.263  |     |       |
| XMS  | 1988 | 265 | 10 | 9       | 34.660   | P          | 0.200    | 0.427  |     |       |
| 1988 | 255  | 11  | 33 | 14.6074 | 50.39700 | 155.17900  | 115.0000 |        | 442 | 0.000 |
| arc  | 1988 | 255 | 11 | 43      | 17.440   | P          | 0.200    | 0.164  |     |       |
| bkr  | 1988 | 255 | 11 | 43      | 16.940   | P          | 0.200    | -0.410 |     |       |
| bmd  | 1988 | 255 | 11 | 43      | 17.750   | P          | 0.200    | -0.193 |     |       |
| ccr  | 1988 | 255 | 11 | 43      | 13.100   | P          | 0.200    | 0.263  |     |       |
| jhn  | 1988 | 255 | 11 | 43      | 16.350   | P          | 0.200    | -0.241 |     |       |
| mnk  | 1988 | 255 | 11 | 43      | 14.420   | P          | 0.200    | 0.274  |     |       |
| ndl  | 1988 | 255 | 11 | 43      | 16.340   | P          | 0.200    | 0.163  |     |       |
| pmt  | 1988 | 255 | 11 | 43      | 17.820   | P          | 0.200    | 0.044  |     |       |
| WMD  | 1988 | 255 | 11 | 43      | 15.720   | P          | 0.200    | 0.167  |     |       |
| ARV  | 1988 | 255 | 11 | 43      | 18.800   | P          | 0.200    | -0.275 |     |       |
| BMT  | 1988 | 255 | 11 | 43      | 19.990   | P          | 0.200    | -0.144 |     |       |
| CAL  | 1988 | 255 | 11 | 43      | 22.850   | P          | 0.200    | 0.098  |     |       |
| CLC  | 1988 | 255 | 11 | 43      | 21.160   | P          | 0.200    | 0.149  |     |       |
| DTP  | 1988 | 255 | 11 | 43      | 22.480   | P          | 0.200    | -0.036 |     |       |
| ISA  | 1988 | 255 | 11 | 43      | 17.630   | P          | 0.200    | -0.424 |     |       |

|     |      |     |    |    |        |   |       |        |
|-----|------|-----|----|----|--------|---|-------|--------|
| JFS | 1988 | 255 | 11 | 43 | 23.080 | P | 0.200 | 0.270  |
| LRM | 1988 | 255 | 11 | 43 | 22.130 | P | 0.200 | -0.051 |
| TEJ | 1988 | 255 | 11 | 43 | 19.000 | P | 0.200 | -0.250 |
| TOW | 1988 | 255 | 11 | 43 | 20.810 | P | 0.200 | 0.467  |
| WBM | 1988 | 255 | 11 | 43 | 20.570 | P | 0.200 | -0.252 |
| WBS | 1988 | 255 | 11 | 43 | 19.530 | P | 0.200 | -0.627 |
| WCS | 1988 | 255 | 11 | 43 | 19.850 | P | 0.200 | 0.465  |
| WJP | 1988 | 255 | 11 | 43 | 18.720 | P | 0.200 | -0.550 |
| WRC | 1988 | 255 | 11 | 43 | 20.480 | P | 0.200 | 0.353  |
| WSC | 1988 | 255 | 11 | 43 | 20.070 | P | 0.200 | -0.287 |
| WVP | 1988 | 255 | 11 | 43 | 19.870 | P | 0.200 | 0.338  |
| XMS | 1988 | 255 | 11 | 43 | 23.680 | P | 0.200 | 0.524  |

|      |      |   |    |         |          |           |         |        |        |
|------|------|---|----|---------|----------|-----------|---------|--------|--------|
| 2006 | 7    | 2 | 23 | 43.9911 | 52.41500 | 173.61301 | 30.8000 | 103    | -0.010 |
| M04C | 2006 | 7 | 2  | 31      | 47.290   | P         | 0.200   | 0.568  |        |
| M03C | 2006 | 7 | 2  | 31      | 48.261   | P         | 0.200   | 0.470  |        |
| WDC  | 2006 | 7 | 2  | 31      | 49.408   | P         | 0.200   | 0.398  |        |
| O02C | 2006 | 7 | 2  | 31      | 50.715   | P         | 0.200   | 0.749  |        |
| GASB | 2006 | 7 | 2  | 31      | 53.761   | P         | 0.200   | 0.780  |        |
| O03C | 2006 | 7 | 2  | 31      | 54.185   | P         | 0.200   | -0.192 |        |
| M06C | 2006 | 7 | 2  | 31      | 56.586   | P         | 0.200   | 0.525  |        |
| O04C | 2006 | 7 | 2  | 31      | 57.894   | P         | 0.200   | 0.403  |        |
| ELFS | 2006 | 7 | 2  | 31      | 58.373   | P         | 0.200   | 0.713  |        |
| ORV  | 2006 | 7 | 2  | 31      | 58.523   | P         | 0.200   | -0.602 |        |
| MNRC | 2006 | 7 | 2  | 31      | 58.711   | P         | 0.200   | 0.612  |        |
| SUTB | 2006 | 7 | 2  | 31      | 58.788   | P         | 0.200   | -0.579 |        |
| O05C | 2006 | 7 | 2  | 32      | 0.265    | P         | 0.200   | 0.334  |        |
| CVS  | 2006 | 7 | 2  | 32      | 0.329    | P         | 0.200   | -0.282 |        |
| BEK  | 2006 | 7 | 2  | 32      | 3.083    | P         | 0.200   | -0.174 |        |
| P05C | 2006 | 7 | 2  | 32      | 4.662    | P         | 0.200   | -0.183 |        |
| R04C | 2006 | 7 | 2  | 32      | 7.907    | P         | 0.200   | -0.316 |        |
| MHC  | 2006 | 7 | 2  | 32      | 9.560    | P         | 0.200   | -0.197 |        |
| R05C | 2006 | 7 | 2  | 32      | 10.521   | P         | 0.200   | 0.082  |        |
| CMB  | 2006 | 7 | 2  | 32      | 12.222   | P         | 0.200   | 0.168  |        |
| SN84 | 2006 | 7 | 2  | 32      | 12.536   | P         | 0.200   | -0.270 |        |
| SAO  | 2006 | 7 | 2  | 32      | 13.085   | P         | 0.200   | -0.383 |        |
| SN85 | 2006 | 7 | 2  | 32      | 13.143   | P         | 0.200   | 0.028  |        |
| SN71 | 2006 | 7 | 2  | 32      | 13.576   | P         | 0.200   | -0.321 |        |
| SN73 | 2006 | 7 | 2  | 32      | 14.380   | P         | 0.200   | -0.155 |        |
| R06C | 2006 | 7 | 2  | 32      | 14.552   | P         | 0.200   | 0.316  |        |
| HAST | 2006 | 7 | 2  | 32      | 14.668   | P         | 0.200   | -0.261 |        |
| SN76 | 2006 | 7 | 2  | 32      | 15.216   | P         | 0.200   | 0.403  |        |
| S05C | 2006 | 7 | 2  | 32      | 15.226   | P         | 0.200   | -0.554 |        |
| S06C | 2006 | 7 | 2  | 32      | 15.466   | P         | 0.200   | -0.048 |        |
| SN62 | 2006 | 7 | 2  | 32      | 15.821   | P         | 0.200   | -0.391 |        |
| T05C | 2006 | 7 | 2  | 32      | 16.955   | P         | 0.200   | 0.504  |        |
| SN51 | 2006 | 7 | 2  | 32      | 17.570   | P         | 0.200   | 0.073  |        |
| SN52 | 2006 | 7 | 2  | 32      | 17.903   | P         | 0.200   | -0.353 |        |
| SN53 | 2006 | 7 | 2  | 32      | 18.039   | P         | 0.200   | -0.230 |        |
| SN54 | 2006 | 7 | 2  | 32      | 18.075   | P         | 0.200   | 0.108  |        |
| SN55 | 2006 | 7 | 2  | 32      | 18.138   | P         | 0.200   | 0.021  |        |
| R07C | 2006 | 7 | 2  | 32      | 18.714   | P         | 0.200   | 0.370  |        |
| SN57 | 2006 | 7 | 2  | 32      | 18.764   | P         | 0.200   | 0.435  |        |
| U04C | 2006 | 7 | 2  | 32      | 18.967   | P         | 0.200   | 0.250  |        |
| SN43 | 2006 | 7 | 2  | 32      | 19.688   | P         | 0.200   | -0.059 |        |
| T06C | 2006 | 7 | 2  | 32      | 20.201   | P         | 0.200   | -0.206 |        |
| SN44 | 2006 | 7 | 2  | 32      | 20.403   | P         | 0.200   | 0.254  |        |
| SN45 | 2006 | 7 | 2  | 32      | 20.495   | P         | 0.200   | 0.286  |        |
| SN48 | 2006 | 7 | 2  | 32      | 20.580   | P         | 0.200   | 0.403  |        |
| SN47 | 2006 | 7 | 2  | 32      | 20.789   | P         | 0.200   | 0.429  |        |
| PKD  | 2006 | 7 | 2  | 32      | 21.588   | P         | 0.200   | -0.366 |        |
| SN21 | 2006 | 7 | 2  | 32      | 21.763   | P         | 0.200   | -0.542 |        |
| SN34 | 2006 | 7 | 2  | 32      | 21.912   | P         | 0.200   | 0.111  |        |

|      |      |   |   |    |        |   |       |        |
|------|------|---|---|----|--------|---|-------|--------|
| SN22 | 2006 | 7 | 2 | 32 | 21.957 | P | 0.200 | -0.225 |
| SN38 | 2006 | 7 | 2 | 32 | 22.075 | P | 0.200 | 0.359  |
| SN23 | 2006 | 7 | 2 | 32 | 22.313 | P | 0.200 | -0.102 |
| U05C | 2006 | 7 | 2 | 32 | 22.354 | P | 0.200 | 0.565  |
| SN37 | 2006 | 7 | 2 | 32 | 22.462 | P | 0.200 | 0.449  |
| SN36 | 2006 | 7 | 2 | 32 | 22.616 | P | 0.200 | 0.436  |
| SN28 | 2006 | 7 | 2 | 32 | 23.858 | P | 0.200 | 0.584  |
| SN26 | 2006 | 7 | 2 | 32 | 24.016 | P | 0.200 | 0.650  |
| HELL | 2006 | 7 | 2 | 32 | 24.852 | P | 0.200 | -0.551 |
| SN15 | 2006 | 7 | 2 | 32 | 24.881 | P | 0.200 | 0.378  |
| RCT  | 2006 | 7 | 2 | 32 | 25.637 | P | 0.200 | -0.383 |
| V05C | 2006 | 7 | 2 | 32 | 25.769 | P | 0.200 | 0.557  |
| S08C | 2006 | 7 | 2 | 32 | 25.844 | P | 0.200 | 0.367  |
| TIN  | 2006 | 7 | 2 | 32 | 27.569 | P | 0.200 | 0.325  |
| SMM  | 2006 | 7 | 2 | 32 | 27.925 | P | 0.200 | 0.157  |
| VES  | 2006 | 7 | 2 | 32 | 28.494 | P | 0.200 | -0.710 |
| CWC  | 2006 | 7 | 2 | 32 | 30.973 | P | 0.200 | -0.090 |
| MPP  | 2006 | 7 | 2 | 32 | 31.013 | P | 0.200 | 0.091  |
| GRA  | 2006 | 7 | 2 | 32 | 31.833 | P | 0.200 | 0.518  |
| ISA  | 2006 | 7 | 2 | 32 | 32.120 | P | 0.200 | -0.847 |
| ARV  | 2006 | 7 | 2 | 32 | 33.176 | P | 0.200 | -0.861 |
| MPM  | 2006 | 7 | 2 | 32 | 35.522 | P | 0.200 | -0.186 |
| FUR  | 2006 | 7 | 2 | 32 | 36.354 | P | 0.200 | 0.187  |
| LRL  | 2006 | 7 | 2 | 32 | 37.134 | P | 0.200 | -0.563 |
| LGU  | 2006 | 7 | 2 | 32 | 37.485 | P | 0.200 | -0.777 |
| EDW2 | 2006 | 7 | 2 | 32 | 38.868 | P | 0.200 | -0.282 |
| DEC  | 2006 | 7 | 2 | 32 | 40.337 | P | 0.200 | -0.538 |
| SHO  | 2006 | 7 | 2 | 32 | 41.643 | P | 0.200 | -0.242 |
| GSC  | 2006 | 7 | 2 | 32 | 42.327 | P | 0.200 | -0.176 |
| RRX  | 2006 | 7 | 2 | 32 | 43.534 | P | 0.200 | -0.184 |
| BFS  | 2006 | 7 | 2 | 32 | 43.739 | P | 0.200 | -0.368 |
| CIA  | 2006 | 7 | 2 | 32 | 44.162 | P | 0.200 | -0.711 |
| TUQ  | 2006 | 7 | 2 | 32 | 45.630 | P | 0.200 | -0.245 |
| HEC  | 2006 | 7 | 2 | 32 | 46.710 | P | 0.200 | -0.342 |
| BBR  | 2006 | 7 | 2 | 32 | 47.160 | P | 0.200 | -0.371 |

|      |      |     |   |         |          |            |         |        |        |
|------|------|-----|---|---------|----------|------------|---------|--------|--------|
| 2005 | 210  | 5   | 0 | 30.3487 | 52.90600 | -168.64700 | 50.3000 | 10     | -0.002 |
| YBH  | 2005 | 210 | 5 | 6       | 57.169   | P          | 0.200   | 0.954  |        |
| WDC  | 2005 | 210 | 5 | 7       | 3.376    | P          | 0.200   | 0.361  |        |
| M05C | 2005 | 210 | 5 | 7       | 6.656    | P          | 0.200   | 0.196  |        |
| M06C | 2005 | 210 | 5 | 7       | 11.148   | P          | 0.200   | 0.333  |        |
| O04C | 2005 | 210 | 5 | 7       | 12.452   | P          | 0.200   | 0.212  |        |
| ELFS | 2005 | 210 | 5 | 7       | 12.846   | P          | 0.200   | 0.361  |        |
| ORV  | 2005 | 210 | 5 | 7       | 13.236   | P          | 0.200   | -0.738 |        |
| MNRC | 2005 | 210 | 5 | 7       | 13.271   | P          | 0.200   | 0.443  |        |
| SUTB | 2005 | 210 | 5 | 7       | 13.414   | P          | 0.200   | -0.814 |        |
| O05C | 2005 | 210 | 5 | 7       | 15.079   | P          | 0.200   | 0.186  |        |
| CVS  | 2005 | 210 | 5 | 7       | 15.136   | P          | 0.200   | -0.455 |        |
| FARB | 2005 | 210 | 5 | 7       | 15.758   | P          | 0.200   | -0.523 |        |
| Q03C | 2005 | 210 | 5 | 7       | 17.140   | P          | 0.200   | 0.871  |        |
| Q04C | 2005 | 210 | 5 | 7       | 18.160   | P          | 0.200   | -0.249 |        |
| BRK  | 2005 | 210 | 5 | 7       | 18.684   | P          | 0.200   | -0.551 |        |
| BKS  | 2005 | 210 | 5 | 7       | 18.900   | P          | 0.200   | -0.421 |        |
| BRIB | 2005 | 210 | 5 | 7       | 19.293   | P          | 0.200   | -0.192 |        |
| P05C | 2005 | 210 | 5 | 7       | 19.770   | P          | 0.200   | -0.417 |        |
| JRSC | 2005 | 210 | 5 | 7       | 21.236   | P          | 0.200   | -0.756 |        |
| LAVA | 2005 | 210 | 5 | 7       | 22.009   | P          | 0.200   | -0.317 |        |
| BNLO | 2005 | 210 | 5 | 7       | 23.064   | P          | 0.200   | -0.842 |        |
| WENL | 2005 | 210 | 5 | 7       | 23.183   | P          | 0.200   | -0.078 |        |
| R04C | 2005 | 210 | 5 | 7       | 23.326   | P          | 0.200   | -0.566 |        |
| MHC  | 2005 | 210 | 5 | 7       | 25.243   | P          | 0.200   | -0.315 |        |
| S04C | 2005 | 210 | 5 | 7       | 25.941   | P          | 0.200   | -0.183 |        |
| SN95 | 2005 | 210 | 5 | 7       | 27.074   | P          | 0.200   | -0.195 |        |

|      |      |     |   |   |        |   |       |        |
|------|------|-----|---|---|--------|---|-------|--------|
| CMB  | 2005 | 210 | 5 | 7 | 28.128 | P | 0.200 | 0.077  |
| SN84 | 2005 | 210 | 5 | 7 | 28.439 | P | 0.200 | -0.404 |
| PACP | 2005 | 210 | 5 | 7 | 28.940 | P | 0.200 | -0.249 |
| SN86 | 2005 | 210 | 5 | 7 | 28.991 | P | 0.200 | 0.098  |
| SN85 | 2005 | 210 | 5 | 7 | 29.073 | P | 0.200 | -0.112 |
| SAO  | 2005 | 210 | 5 | 7 | 29.107 | P | 0.200 | -0.564 |
| SN71 | 2005 | 210 | 5 | 7 | 29.710 | P | 0.200 | -0.350 |
| SN73 | 2005 | 210 | 5 | 7 | 30.552 | P | 0.200 | -0.201 |
| SN74 | 2005 | 210 | 5 | 7 | 30.629 | P | 0.200 | -0.213 |
| HAST | 2005 | 210 | 5 | 7 | 30.803 | P | 0.200 | -0.484 |
| BMN  | 2005 | 210 | 5 | 7 | 31.357 | P | 0.200 | -0.400 |
| S05C | 2005 | 210 | 5 | 7 | 31.486 | P | 0.200 | -0.636 |
| SCZ  | 2005 | 210 | 5 | 7 | 31.768 | P | 0.200 | 0.958  |
| SN62 | 2005 | 210 | 5 | 7 | 32.150 | P | 0.200 | -0.420 |
| T05C | 2005 | 210 | 5 | 7 | 33.354 | P | 0.200 | 0.485  |
| SN67 | 2005 | 210 | 5 | 7 | 33.414 | P | 0.200 | 0.098  |
| SN52 | 2005 | 210 | 5 | 7 | 34.432 | P | 0.200 | -0.392 |
| SN53 | 2005 | 210 | 5 | 7 | 34.596 | P | 0.200 | -0.196 |
| V03C | 2005 | 210 | 5 | 7 | 34.954 | P | 0.200 | 0.046  |
| SN57 | 2005 | 210 | 5 | 7 | 35.151 | P | 0.200 | 0.245  |
| SN56 | 2005 | 210 | 5 | 7 | 35.193 | P | 0.200 | 0.175  |
| U04C | 2005 | 210 | 5 | 7 | 35.558 | P | 0.200 | 0.165  |
| SN42 | 2005 | 210 | 5 | 7 | 36.372 | P | 0.200 | -0.233 |
| SN43 | 2005 | 210 | 5 | 7 | 36.375 | P | 0.200 | -0.030 |
| T06C | 2005 | 210 | 5 | 7 | 36.940 | P | 0.200 | -0.235 |
| SN45 | 2005 | 210 | 5 | 7 | 37.084 | P | 0.200 | 0.138  |
| SN44 | 2005 | 210 | 5 | 7 | 37.088 | P | 0.200 | 0.220  |
| SN48 | 2005 | 210 | 5 | 7 | 37.094 | P | 0.200 | 0.184  |
| SN47 | 2005 | 210 | 5 | 7 | 37.406 | P | 0.200 | 0.305  |
| SN46 | 2005 | 210 | 5 | 7 | 37.803 | P | 0.200 | 0.430  |
| PKD  | 2005 | 210 | 5 | 7 | 38.603 | P | 0.200 | -0.345 |
| SN38 | 2005 | 210 | 5 | 7 | 38.736 | P | 0.200 | 0.116  |
| V04C | 2005 | 210 | 5 | 7 | 39.161 | P | 0.200 | 0.195  |
| RAMR | 2005 | 210 | 5 | 7 | 39.162 | P | 0.200 | 0.199  |
| SN37 | 2005 | 210 | 5 | 7 | 39.235 | P | 0.200 | 0.317  |
| SN23 | 2005 | 210 | 5 | 7 | 39.257 | P | 0.200 | -0.071 |
| SN24 | 2005 | 210 | 5 | 7 | 39.916 | P | 0.200 | 0.213  |
| SN11 | 2005 | 210 | 5 | 7 | 40.325 | P | 0.200 | -0.553 |
| SN28 | 2005 | 210 | 5 | 7 | 40.776 | P | 0.200 | 0.435  |
| SN26 | 2005 | 210 | 5 | 7 | 40.824 | P | 0.200 | 0.401  |
| SN25 | 2005 | 210 | 5 | 7 | 40.841 | P | 0.200 | 0.154  |
| HELL | 2005 | 210 | 5 | 7 | 42.096 | P | 0.200 | -0.541 |
| RCT  | 2005 | 210 | 5 | 7 | 42.929 | P | 0.200 | -0.434 |
| V05C | 2005 | 210 | 5 | 7 | 43.077 | P | 0.200 | 0.560  |
| PHL  | 2005 | 210 | 5 | 7 | 43.356 | P | 0.200 | 1.457  |
| TPH  | 2005 | 210 | 5 | 7 | 43.906 | P | 0.200 | -0.362 |
| TIN  | 2005 | 210 | 5 | 7 | 44.932 | P | 0.200 | 0.303  |
| SMM  | 2005 | 210 | 5 | 7 | 45.508 | P | 0.200 | 0.175  |
| VES  | 2005 | 210 | 5 | 7 | 46.198 | P | 0.200 | -0.645 |
| SDP  | 2005 | 210 | 5 | 7 | 46.984 | P | 0.200 | -0.131 |
| MPP  | 2005 | 210 | 5 | 7 | 48.963 | P | 0.200 | 0.153  |
| GRA  | 2005 | 210 | 5 | 7 | 49.469 | P | 0.200 | 0.310  |
| ISA  | 2005 | 210 | 5 | 7 | 50.322 | P | 0.200 | -0.639 |
| BAK  | 2005 | 210 | 5 | 7 | 50.462 | P | 0.200 | 0.936  |
| ARV  | 2005 | 210 | 5 | 7 | 51.273 | P | 0.200 | -0.906 |
| MPM  | 2005 | 210 | 5 | 7 | 53.749 | P | 0.200 | -0.159 |
| FUR  | 2005 | 210 | 5 | 7 | 54.468 | P | 0.200 | -0.024 |
| LRL  | 2005 | 210 | 5 | 7 | 55.471 | P | 0.200 | -0.658 |
| OSI  | 2005 | 210 | 5 | 7 | 55.478 | P | 0.200 | -0.249 |
| SLA  | 2005 | 210 | 5 | 7 | 56.862 | P | 0.200 | 1.049  |
| EDW2 | 2005 | 210 | 5 | 7 | 57.294 | P | 0.200 | -0.471 |
| TOV  | 2005 | 210 | 5 | 7 | 58.724 | P | 0.200 | 0.959  |
| DEC  | 2005 | 210 | 5 | 7 | 59.180 | P | 0.200 | -0.507 |

|      |      |     |   |   |        |   |       |        |
|------|------|-----|---|---|--------|---|-------|--------|
| SNCC | 2005 | 210 | 5 | 7 | 59.249 | P | 0.200 | -0.323 |
| SHO  | 2005 | 210 | 5 | 8 | 0.251  | P | 0.200 | -0.479 |
| DJJ  | 2005 | 210 | 5 | 8 | 0.523  | P | 0.200 | 0.683  |
| VCS  | 2005 | 210 | 5 | 8 | 0.838  | P | 0.200 | 1.341  |
| GSC  | 2005 | 210 | 5 | 8 | 1.039  | P | 0.200 | -0.370 |
| PAS  | 2005 | 210 | 5 | 8 | 1.738  | P | 0.200 | 0.681  |
| CHF  | 2005 | 210 | 5 | 8 | 2.052  | P | 0.200 | 1.172  |
| MWC  | 2005 | 210 | 5 | 8 | 2.367  | P | 0.200 | 0.945  |
| BFS  | 2005 | 210 | 5 | 8 | 2.811  | P | 0.200 | -0.398 |
| RPV  | 2005 | 210 | 5 | 8 | 2.909  | P | 0.200 | 0.672  |
| CIA  | 2005 | 210 | 5 | 8 | 3.431  | P | 0.200 | -0.746 |
| VTV  | 2005 | 210 | 5 | 8 | 4.013  | P | 0.200 | 1.071  |
| TUQ  | 2005 | 210 | 5 | 8 | 4.625  | P | 0.200 | -0.506 |
| HEC  | 2005 | 210 | 5 | 8 | 5.925  | P | 0.200 | -0.492 |
| BBR  | 2005 | 210 | 5 | 8 | 6.576  | P | 0.200 | -0.350 |
| SVD  | 2005 | 210 | 5 | 8 | 7.784  | P | 0.200 | 1.057  |

|      |     |    |    |        |          |            |         |    |        |
|------|-----|----|----|--------|----------|------------|---------|----|--------|
| 2005 | 324 | 12 | 53 | 4.3685 | 53.84300 | -164.09300 | 30.0000 | 37 | -0.009 |
|------|-----|----|----|--------|----------|------------|---------|----|--------|

|      |      |     |    |    |        |   |       |        |
|------|------|-----|----|----|--------|---|-------|--------|
| HUMO | 2005 | 324 | 12 | 59 | 3.703  | P | 0.200 | 0.754  |
| YBH  | 2005 | 324 | 12 | 59 | 10.074 | P | 0.200 | 1.051  |
| M02C | 2005 | 324 | 12 | 59 | 11.204 | P | 0.200 | 1.083  |
| M04C | 2005 | 324 | 12 | 59 | 13.811 | P | 0.200 | 0.445  |
| M03C | 2005 | 324 | 12 | 59 | 14.890 | P | 0.200 | 0.232  |
| WDC  | 2005 | 324 | 12 | 59 | 16.608 | P | 0.200 | 0.400  |
| P01C | 2005 | 324 | 12 | 59 | 18.646 | P | 0.200 | 0.177  |
| M05C | 2005 | 324 | 12 | 59 | 19.616 | P | 0.200 | 0.332  |
| HATC | 2005 | 324 | 12 | 59 | 20.844 | P | 0.200 | 0.230  |
| GASB | 2005 | 324 | 12 | 59 | 21.544 | P | 0.200 | 0.761  |
| HOPS | 2005 | 324 | 12 | 59 | 22.577 | P | 0.200 | -0.096 |
| M06C | 2005 | 324 | 12 | 59 | 23.967 | P | 0.200 | 0.337  |
| O04C | 2005 | 324 | 12 | 59 | 25.604 | P | 0.200 | 0.208  |
| ELFS | 2005 | 324 | 12 | 59 | 26.023 | P | 0.200 | 0.516  |
| ORV  | 2005 | 324 | 12 | 59 | 26.884 | P | 0.200 | -0.542 |
| SUTB | 2005 | 324 | 12 | 59 | 26.953 | P | 0.200 | -0.877 |
| MNRC | 2005 | 324 | 12 | 59 | 27.101 | P | 0.200 | 0.489  |
| O05C | 2005 | 324 | 12 | 59 | 28.441 | P | 0.200 | 0.274  |
| CVS  | 2005 | 324 | 12 | 59 | 29.163 | P | 0.200 | -0.418 |
| FARB | 2005 | 324 | 12 | 59 | 29.940 | P | 0.200 | -0.633 |
| Q03C | 2005 | 324 | 12 | 59 | 30.965 | P | 0.200 | 0.864  |
| Q04C | 2005 | 324 | 12 | 59 | 31.851 | P | 0.200 | -0.263 |
| BRK  | 2005 | 324 | 12 | 59 | 32.864 | P | 0.200 | -0.523 |
| BKS  | 2005 | 324 | 12 | 59 | 33.126 | P | 0.200 | -0.339 |
| P05C | 2005 | 324 | 12 | 59 | 33.436 | P | 0.200 | -0.227 |
| BRIB | 2005 | 324 | 12 | 59 | 33.495 | P | 0.200 | -0.105 |
| BDM  | 2005 | 324 | 12 | 59 | 34.780 | P | 0.200 | -0.095 |
| JRSC | 2005 | 324 | 12 | 59 | 35.489 | P | 0.200 | -0.807 |
| WENL | 2005 | 324 | 12 | 59 | 37.401 | P | 0.200 | -0.034 |
| BNLO | 2005 | 324 | 12 | 59 | 37.510 | P | 0.200 | -0.805 |
| R04C | 2005 | 324 | 12 | 59 | 37.535 | P | 0.200 | -0.226 |
| MHC  | 2005 | 324 | 12 | 59 | 39.503 | P | 0.200 | -0.329 |
| R05C | 2005 | 324 | 12 | 59 | 39.949 | P | 0.200 | 0.017  |
| S04C | 2005 | 324 | 12 | 59 | 40.258 | P | 0.200 | -0.044 |
| SN95 | 2005 | 324 | 12 | 59 | 40.948 | P | 0.200 | -0.116 |
| CMB  | 2005 | 324 | 12 | 59 | 42.218 | P | 0.200 | 0.258  |
| SN84 | 2005 | 324 | 12 | 59 | 42.417 | P | 0.200 | -0.264 |
| SN86 | 2005 | 324 | 12 | 59 | 42.826 | P | 0.200 | 0.233  |
| SN85 | 2005 | 324 | 12 | 59 | 42.941 | P | 0.200 | -0.020 |
| PACP | 2005 | 324 | 12 | 59 | 43.334 | P | 0.200 | -0.209 |
| SN71 | 2005 | 324 | 12 | 59 | 43.890 | P | 0.200 | -0.199 |
| SAO  | 2005 | 324 | 12 | 59 | 43.907 | P | 0.200 | -0.224 |
| R06C | 2005 | 324 | 12 | 59 | 44.356 | P | 0.200 | 0.273  |
| SN73 | 2005 | 324 | 12 | 59 | 44.543 | P | 0.200 | -0.152 |
| SN76 | 2005 | 324 | 12 | 59 | 45.069 | P | 0.200 | 0.312  |



|      |      |     |    |    |        |   |       |        |
|------|------|-----|----|----|--------|---|-------|--------|
| HAST | 2005 | 324 | 12 | 59 | 45.405 | P | 0.200 | -0.475 |
| S06C | 2005 | 324 | 12 | 59 | 45.625 | P | 0.200 | -0.095 |
| S05C | 2005 | 324 | 12 | 59 | 45.764 | P | 0.200 | -0.487 |
| SN62 | 2005 | 324 | 12 | 59 | 46.265 | P | 0.200 | -0.323 |
| SN66 | 2005 | 324 | 12 | 59 | 46.945 | P | 0.200 | 0.200  |
| SN64 | 2005 | 324 | 12 | 59 | 47.089 | P | 0.200 | 0.091  |
| SN67 | 2005 | 324 | 12 | 59 | 47.275 | P | 0.200 | 0.244  |
| T05C | 2005 | 324 | 12 | 59 | 47.576 | P | 0.200 | 0.376  |
| SN51 | 2005 | 324 | 12 | 59 | 48.128 | P | 0.200 | -0.029 |
| SN54 | 2005 | 324 | 12 | 59 | 48.523 | P | 0.200 | 0.137  |
| SN52 | 2005 | 324 | 12 | 59 | 48.668 | P | 0.200 | -0.250 |
| SN55 | 2005 | 324 | 12 | 59 | 48.688 | P | 0.200 | 0.172  |
| SN53 | 2005 | 324 | 12 | 59 | 48.710 | P | 0.200 | -0.099 |
| R07C | 2005 | 324 | 12 | 59 | 48.908 | P | 0.200 | 0.252  |
| SN57 | 2005 | 324 | 12 | 59 | 48.997 | P | 0.200 | 0.333  |
| SN56 | 2005 | 324 | 12 | 59 | 49.160 | P | 0.200 | 0.324  |
| V03C | 2005 | 324 | 12 | 59 | 49.556 | P | 0.200 | -0.057 |
| U04C | 2005 | 324 | 12 | 59 | 50.235 | P | 0.200 | 0.313  |
| SN43 | 2005 | 324 | 12 | 59 | 50.460 | P | 0.200 | 0.016  |
| SN48 | 2005 | 324 | 12 | 59 | 50.806 | P | 0.200 | 0.182  |
| MNV  | 2005 | 324 | 12 | 59 | 51.135 | P | 0.200 | 0.057  |
| SN44 | 2005 | 324 | 12 | 59 | 51.227 | P | 0.200 | 0.366  |
| SN45 | 2005 | 324 | 12 | 59 | 51.246 | P | 0.200 | 0.378  |
| T06C | 2005 | 324 | 12 | 59 | 51.285 | P | 0.200 | -0.094 |
| SN47 | 2005 | 324 | 12 | 59 | 51.342 | P | 0.200 | 0.449  |
| SN46 | 2005 | 324 | 12 | 59 | 51.717 | P | 0.200 | 0.465  |
| SN38 | 2005 | 324 | 12 | 59 | 52.625 | P | 0.200 | 0.259  |
| SN34 | 2005 | 324 | 12 | 59 | 53.005 | P | 0.200 | 0.347  |
| SN22 | 2005 | 324 | 12 | 59 | 53.108 | P | 0.200 | -0.157 |
| SN37 | 2005 | 324 | 12 | 59 | 53.114 | P | 0.200 | 0.362  |
| PKD  | 2005 | 324 | 12 | 59 | 53.408 | P | 0.200 | -0.190 |
| SN36 | 2005 | 324 | 12 | 59 | 53.533 | P | 0.200 | 0.535  |
| SN23 | 2005 | 324 | 12 | 59 | 53.572 | P | 0.200 | 0.121  |
| U05C | 2005 | 324 | 12 | 59 | 53.741 | P | 0.200 | 0.514  |
| V04C | 2005 | 324 | 12 | 59 | 53.864 | P | 0.200 | 0.086  |
| RAMR | 2005 | 324 | 12 | 59 | 53.865 | P | 0.200 | 0.089  |
| SN28 | 2005 | 324 | 12 | 59 | 54.556 | P | 0.200 | 0.430  |
| SN11 | 2005 | 324 | 12 | 59 | 54.645 | P | 0.200 | -0.509 |
| SN26 | 2005 | 324 | 12 | 59 | 54.833 | P | 0.200 | 0.495  |
| SN25 | 2005 | 324 | 12 | 59 | 55.087 | P | 0.200 | 0.403  |
| SN15 | 2005 | 324 | 12 | 59 | 56.089 | P | 0.200 | 0.446  |
| HELL | 2005 | 324 | 12 | 59 | 56.550 | P | 0.200 | -0.347 |
| S08C | 2005 | 324 | 12 | 59 | 57.143 | P | 0.200 | 0.523  |
| TIN  | 2005 | 324 | 12 | 59 | 59.050 | P | 0.200 | 0.344  |
| SMM  | 2005 | 324 | 13 | 0  | 0.286  | P | 0.200 | 0.115  |
| VES  | 2005 | 324 | 13 | 0  | 0.751  | P | 0.200 | -0.646 |
| SDP  | 2005 | 324 | 13 | 0  | 2.040  | P | 0.200 | -0.232 |
| CWC  | 2005 | 324 | 13 | 0  | 3.215  | P | 0.200 | 0.115  |
| GRA  | 2005 | 324 | 13 | 0  | 3.703  | P | 0.200 | 0.499  |
| MPP  | 2005 | 324 | 13 | 0  | 3.926  | P | 0.200 | 0.143  |
| ISA  | 2005 | 324 | 13 | 0  | 4.987  | P | 0.200 | -0.551 |
| ARV  | 2005 | 324 | 13 | 0  | 6.306  | P | 0.200 | -0.664 |
| SBC  | 2005 | 324 | 13 | 0  | 6.848  | P | 0.200 | 0.065  |
| MPM  | 2005 | 324 | 13 | 0  | 8.256  | P | 0.200 | -0.006 |
| FUR  | 2005 | 324 | 13 | 0  | 8.800  | P | 0.200 | 0.119  |
| TPNV | 2005 | 324 | 13 | 0  | 9.092  | P | 0.200 | -0.177 |
| SCZ2 | 2005 | 324 | 13 | 0  | 9.323  | P | 0.200 | -0.584 |
| LRL  | 2005 | 324 | 13 | 0  | 10.239 | P | 0.200 | -0.462 |
| OSI  | 2005 | 324 | 13 | 0  | 10.533 | P | 0.200 | -0.160 |
| LGU  | 2005 | 324 | 13 | 0  | 11.299 | P | 0.200 | -0.744 |
| EDW2 | 2005 | 324 | 13 | 0  | 12.193 | P | 0.200 | -0.393 |
| DEC  | 2005 | 324 | 13 | 0  | 14.228 | P | 0.200 | -0.520 |
| SNCC | 2005 | 324 | 13 | 0  | 14.676 | P | 0.200 | -0.444 |

|     |      |     |    |   |        |   |       |        |
|-----|------|-----|----|---|--------|---|-------|--------|
| SHO | 2005 | 324 | 13 | 0 | 14.789 | P | 0.200 | -0.305 |
| GSC | 2005 | 324 | 13 | 0 | 15.758 | P | 0.200 | -0.242 |
| FMP | 2005 | 324 | 13 | 0 | 17.467 | P | 0.200 | -0.631 |
| BFS | 2005 | 324 | 13 | 0 | 17.956 | P | 0.200 | -0.263 |
| CIA | 2005 | 324 | 13 | 0 | 18.788 | P | 0.200 | -0.763 |
| TUQ | 2005 | 324 | 13 | 0 | 19.298 | P | 0.200 | -0.321 |
| HEC | 2005 | 324 | 13 | 0 | 20.724 | P | 0.200 | -0.395 |
| BBR | 2005 | 324 | 13 | 0 | 21.407 | P | 0.200 | -0.450 |

|      |     |    |    |         |          |           |          |    |        |
|------|-----|----|----|---------|----------|-----------|----------|----|--------|
| 2005 | 327 | 19 | 33 | 45.8663 | 50.07300 | 147.70399 | 631.9000 | 39 | -0.003 |
|------|-----|----|----|---------|----------|-----------|----------|----|--------|

|      |      |     |    |    |        |   |       |        |
|------|------|-----|----|----|--------|---|-------|--------|
| TAKO | 2005 | 327 | 19 | 42 | 35.455 | P | 0.200 | 1.020  |
| I03A | 2005 | 327 | 19 | 42 | 37.507 | P | 0.200 | 1.048  |
| HUMO | 2005 | 327 | 19 | 42 | 44.347 | P | 0.200 | 0.643  |
| YBH  | 2005 | 327 | 19 | 42 | 49.369 | P | 0.200 | 0.900  |
| M02C | 2005 | 327 | 19 | 42 | 50.437 | P | 0.200 | 1.025  |
| N02C | 2005 | 327 | 19 | 42 | 50.767 | P | 0.200 | 0.541  |
| M04C | 2005 | 327 | 19 | 42 | 52.114 | P | 0.200 | 0.501  |
| M03C | 2005 | 327 | 19 | 42 | 53.169 | P | 0.200 | 0.378  |
| WDC  | 2005 | 327 | 19 | 42 | 54.387 | P | 0.200 | 0.288  |
| P01C | 2005 | 327 | 19 | 42 | 56.230 | P | 0.200 | 0.176  |
| M05C | 2005 | 327 | 19 | 42 | 56.326 | P | 0.200 | 0.262  |
| HATC | 2005 | 327 | 19 | 42 | 57.576 | P | 0.200 | 0.342  |
| O03C | 2005 | 327 | 19 | 42 | 58.352 | P | 0.200 | -0.275 |
| GASB | 2005 | 327 | 19 | 42 | 58.581 | P | 0.200 | 0.783  |
| M06C | 2005 | 327 | 19 | 42 | 59.491 | P | 0.200 | 0.307  |
| O04C | 2005 | 327 | 19 | 43 | 1.296  | P | 0.200 | 0.431  |
| ELFS | 2005 | 327 | 19 | 43 | 1.329  | P | 0.200 | 0.550  |
| ORV  | 2005 | 327 | 19 | 43 | 1.919  | P | 0.200 | -0.665 |
| SUTB | 2005 | 327 | 19 | 43 | 2.310  | P | 0.200 | -0.624 |
| MNRC | 2005 | 327 | 19 | 43 | 2.783  | P | 0.200 | 0.582  |
| O05C | 2005 | 327 | 19 | 43 | 2.996  | P | 0.200 | 0.075  |
| CVS  | 2005 | 327 | 19 | 43 | 4.137  | P | 0.200 | -0.254 |
| FARB | 2005 | 327 | 19 | 43 | 4.634  | P | 0.200 | -0.424 |
| Q03C | 2005 | 327 | 19 | 43 | 5.806  | P | 0.200 | 1.108  |
| Q04C | 2005 | 327 | 19 | 43 | 6.242  | P | 0.200 | 0.157  |
| P05C | 2005 | 327 | 19 | 43 | 6.846  | P | 0.200 | -0.301 |
| BRK  | 2005 | 327 | 19 | 43 | 6.960  | P | 0.200 | -0.238 |
| BKS  | 2005 | 327 | 19 | 43 | 7.142  | P | 0.200 | -0.065 |
| BRIB | 2005 | 327 | 19 | 43 | 7.263  | P | 0.200 | -0.011 |
| BDM  | 2005 | 327 | 19 | 43 | 8.316  | P | 0.200 | 0.044  |
| LAVA | 2005 | 327 | 19 | 43 | 8.743  | P | 0.200 | -0.233 |
| JRSC | 2005 | 327 | 19 | 43 | 8.824  | P | 0.200 | -0.531 |
| R04C | 2005 | 327 | 19 | 43 | 9.833  | P | 0.200 | -0.407 |
| WENL | 2005 | 327 | 19 | 43 | 10.186 | P | 0.200 | 0.014  |
| BNLO | 2005 | 327 | 19 | 43 | 10.325 | P | 0.200 | -0.488 |
| R05C | 2005 | 327 | 19 | 43 | 11.683 | P | 0.200 | -0.131 |
| MHC  | 2005 | 327 | 19 | 43 | 11.799 | P | 0.200 | -0.220 |
| S04C | 2005 | 327 | 19 | 43 | 12.132 | P | 0.200 | -0.214 |
| SN95 | 2005 | 327 | 19 | 43 | 12.581 | P | 0.200 | -0.104 |
| CMB  | 2005 | 327 | 19 | 43 | 13.419 | P | 0.200 | 0.056  |
| SN84 | 2005 | 327 | 19 | 43 | 13.599 | P | 0.200 | -0.354 |
| SN86 | 2005 | 327 | 19 | 43 | 13.984 | P | 0.200 | 0.152  |
| SN85 | 2005 | 327 | 19 | 43 | 14.026 | P | 0.200 | -0.100 |
| SN71 | 2005 | 327 | 19 | 43 | 14.395 | P | 0.200 | -0.611 |
| PACP | 2005 | 327 | 19 | 43 | 14.732 | P | 0.200 | 0.062  |
| SAO  | 2005 | 327 | 19 | 43 | 14.779 | P | 0.200 | -0.312 |
| R06C | 2005 | 327 | 19 | 43 | 15.080 | P | 0.200 | 0.248  |
| SN73 | 2005 | 327 | 19 | 43 | 15.100 | P | 0.200 | -0.313 |
| SN74 | 2005 | 327 | 19 | 43 | 15.281 | P | 0.200 | -0.148 |
| SN76 | 2005 | 327 | 19 | 43 | 15.618 | P | 0.200 | 0.219  |
| S06C | 2005 | 327 | 19 | 43 | 15.990 | P | 0.200 | -0.187 |
| HAST | 2005 | 327 | 19 | 43 | 16.003 | P | 0.200 | -0.408 |
| S05C | 2005 | 327 | 19 | 43 | 16.125 | P | 0.200 | -0.480 |

|      |      |     |    |    |        |   |       |        |
|------|------|-----|----|----|--------|---|-------|--------|
| SN62 | 2005 | 327 | 19 | 43 | 16.178 | P | 0.200 | -0.671 |
| SN66 | 2005 | 327 | 19 | 43 | 17.042 | P | 0.200 | 0.134  |
| SN64 | 2005 | 327 | 19 | 43 | 17.090 | P | 0.200 | -0.071 |
| SN67 | 2005 | 327 | 19 | 43 | 17.278 | P | 0.200 | 0.294  |
| T05C | 2005 | 327 | 19 | 43 | 17.770 | P | 0.200 | 0.399  |
| SN52 | 2005 | 327 | 19 | 43 | 18.000 | P | 0.200 | -0.510 |
| SN51 | 2005 | 327 | 19 | 43 | 18.019 | P | 0.200 | 0.073  |
| SN54 | 2005 | 327 | 19 | 43 | 18.095 | P | 0.200 | -0.092 |
| SN53 | 2005 | 327 | 19 | 43 | 18.195 | P | 0.200 | -0.331 |
| SN55 | 2005 | 327 | 19 | 43 | 18.204 | P | 0.200 | 0.001  |
| R07C | 2005 | 327 | 19 | 43 | 18.647 | P | 0.200 | 0.355  |
| SN57 | 2005 | 327 | 19 | 43 | 18.693 | P | 0.200 | 0.539  |
| SN56 | 2005 | 327 | 19 | 43 | 18.720 | P | 0.200 | 0.254  |
| V03C | 2005 | 327 | 19 | 43 | 19.136 | P | 0.200 | 0.067  |
| SN43 | 2005 | 327 | 19 | 43 | 19.526 | P | 0.200 | -0.203 |
| U04C | 2005 | 327 | 19 | 43 | 19.580 | P | 0.200 | 0.238  |
| MNV  | 2005 | 327 | 19 | 43 | 19.797 | P | 0.200 | 0.020  |
| T06C | 2005 | 327 | 19 | 43 | 19.866 | P | 0.200 | -0.519 |
| SN48 | 2005 | 327 | 19 | 43 | 19.880 | P | 0.200 | 0.242  |
| SN44 | 2005 | 327 | 19 | 43 | 19.975 | P | 0.200 | 0.021  |
| SN45 | 2005 | 327 | 19 | 43 | 20.070 | P | 0.200 | 0.169  |
| SN47 | 2005 | 327 | 19 | 43 | 20.112 | P | 0.200 | 0.208  |
| SN46 | 2005 | 327 | 19 | 43 | 20.619 | P | 0.200 | 0.399  |
| SN38 | 2005 | 327 | 19 | 43 | 21.181 | P | 0.200 | 0.361  |
| SN34 | 2005 | 327 | 19 | 43 | 21.333 | P | 0.200 | -0.030 |
| SN22 | 2005 | 327 | 19 | 43 | 21.352 | P | 0.200 | -0.407 |
| SN37 | 2005 | 327 | 19 | 43 | 21.387 | P | 0.200 | 0.173  |
| SN23 | 2005 | 327 | 19 | 43 | 21.626 | P | 0.200 | -0.319 |
| SN36 | 2005 | 327 | 19 | 43 | 21.670 | P | 0.200 | 0.281  |
| PKD  | 2005 | 327 | 19 | 43 | 21.752 | P | 0.200 | -0.303 |
| U05C | 2005 | 327 | 19 | 43 | 22.302 | P | 0.200 | 0.614  |
| V04C | 2005 | 327 | 19 | 43 | 22.325 | P | 0.200 | 0.221  |
| RAMR | 2005 | 327 | 19 | 43 | 22.325 | P | 0.200 | 0.223  |
| SN28 | 2005 | 327 | 19 | 43 | 22.509 | P | 0.200 | 0.432  |
| SN26 | 2005 | 327 | 19 | 43 | 22.778 | P | 0.200 | 0.453  |
| SN25 | 2005 | 327 | 19 | 43 | 22.848 | P | 0.200 | 0.114  |
| SN15 | 2005 | 327 | 19 | 43 | 23.631 | P | 0.200 | 0.200  |
| HELL | 2005 | 327 | 19 | 43 | 23.769 | P | 0.200 | -0.613 |
| S08C | 2005 | 327 | 19 | 43 | 24.269 | P | 0.200 | 0.210  |
| TPH  | 2005 | 327 | 19 | 43 | 24.601 | P | 0.200 | -0.139 |
| V05C | 2005 | 327 | 19 | 43 | 25.059 | P | 0.200 | 0.498  |
| TIN  | 2005 | 327 | 19 | 43 | 25.830 | P | 0.200 | 0.177  |
| SMM  | 2005 | 327 | 19 | 43 | 27.013 | P | 0.200 | 0.174  |
| SDP  | 2005 | 327 | 19 | 43 | 27.938 | P | 0.200 | -0.453 |
| CWC  | 2005 | 327 | 19 | 43 | 28.674 | P | 0.200 | -0.254 |
| GRA  | 2005 | 327 | 19 | 43 | 29.124 | P | 0.200 | 0.420  |
| MPP  | 2005 | 327 | 19 | 43 | 29.646 | P | 0.200 | 0.172  |
| ISA  | 2005 | 327 | 19 | 43 | 29.662 | P | 0.200 | -1.013 |
| ARV  | 2005 | 327 | 19 | 43 | 31.011 | P | 0.200 | -0.711 |
| MPM  | 2005 | 327 | 19 | 43 | 32.437 | P | 0.200 | -0.235 |
| TPNV | 2005 | 327 | 19 | 43 | 32.911 | P | 0.200 | -0.140 |
| FUR  | 2005 | 327 | 19 | 43 | 32.915 | P | 0.200 | 0.256  |
| SCZ2 | 2005 | 327 | 19 | 43 | 33.469 | P | 0.200 | -0.346 |
| LRL  | 2005 | 327 | 19 | 43 | 34.061 | P | 0.200 | -0.374 |
| OSI  | 2005 | 327 | 19 | 43 | 34.346 | P | 0.200 | -0.168 |
| LGU  | 2005 | 327 | 19 | 43 | 34.755 | P | 0.200 | -0.748 |
| EDW2 | 2005 | 327 | 19 | 43 | 35.700 | P | 0.200 | -0.087 |
| DEC  | 2005 | 327 | 19 | 43 | 36.911 | P | 0.200 | -0.517 |
| SHO  | 2005 | 327 | 19 | 43 | 37.152 | P | 0.200 | -0.248 |
| GSC  | 2005 | 327 | 19 | 43 | 37.949 | P | 0.200 | -0.247 |
| RRX  | 2005 | 327 | 19 | 43 | 39.261 | P | 0.200 | -0.046 |
| FMP  | 2005 | 327 | 19 | 43 | 39.276 | P | 0.200 | -0.472 |
| BFS  | 2005 | 327 | 19 | 43 | 39.449 | P | 0.200 | -0.504 |

|     |      |     |    |    |        |   |       |        |
|-----|------|-----|----|----|--------|---|-------|--------|
| CIA | 2005 | 327 | 19 | 43 | 40.165 | P | 0.200 | -0.726 |
| TUQ | 2005 | 327 | 19 | 43 | 40.602 | P | 0.200 | -0.089 |
| HEC | 2005 | 327 | 19 | 43 | 41.803 | P | 0.200 | -0.131 |
| BBR | 2005 | 327 | 19 | 43 | 42.166 | P | 0.200 | -0.491 |

|      |     |    |   |         |          |           |         |    |        |
|------|-----|----|---|---------|----------|-----------|---------|----|--------|
| 2005 | 346 | 21 | 1 | 40.7137 | 43.20600 | 139.32899 | 26.4000 | 45 | -0.003 |
|------|-----|----|---|---------|----------|-----------|---------|----|--------|

|      |      |     |    |    |        |   |       |        |
|------|------|-----|----|----|--------|---|-------|--------|
| I03A | 2005 | 346 | 21 | 12 | 26.579 | P | 0.200 | 0.925  |
| HUMO | 2005 | 346 | 21 | 12 | 33.088 | P | 0.200 | 0.825  |
| JCC  | 2005 | 346 | 21 | 12 | 35.995 | P | 0.200 | 0.782  |
| YBH  | 2005 | 346 | 21 | 12 | 37.447 | P | 0.200 | 0.828  |
| M02C | 2005 | 346 | 21 | 12 | 38.361 | P | 0.200 | 0.948  |
| N02C | 2005 | 346 | 21 | 12 | 38.433 | P | 0.200 | 0.476  |
| O01C | 2005 | 346 | 21 | 12 | 39.448 | P | 0.200 | 0.804  |
| M04C | 2005 | 346 | 21 | 12 | 40.133 | P | 0.200 | 0.377  |
| M03C | 2005 | 346 | 21 | 12 | 40.914 | P | 0.200 | 0.211  |
| WDC  | 2005 | 346 | 21 | 12 | 42.019 | P | 0.200 | 0.325  |
| P01C | 2005 | 346 | 21 | 12 | 43.392 | P | 0.200 | 0.265  |
| M05C | 2005 | 346 | 21 | 12 | 44.123 | P | 0.200 | 0.154  |
| HATC | 2005 | 346 | 21 | 12 | 45.185 | P | 0.200 | 0.272  |
| GASB | 2005 | 346 | 21 | 12 | 45.623 | P | 0.200 | 0.659  |
| O03C | 2005 | 346 | 21 | 12 | 45.843 | P | 0.200 | -0.105 |
| HOPS | 2005 | 346 | 21 | 12 | 46.003 | P | 0.200 | -0.125 |
| M06C | 2005 | 346 | 21 | 12 | 47.338 | P | 0.200 | 0.333  |
| O04C | 2005 | 346 | 21 | 12 | 48.510 | P | 0.200 | 0.211  |
| ELFS | 2005 | 346 | 21 | 12 | 48.768 | P | 0.200 | 0.424  |
| ORV  | 2005 | 346 | 21 | 12 | 49.036 | P | 0.200 | -0.650 |
| SUTB | 2005 | 346 | 21 | 12 | 49.178 | P | 0.200 | -0.694 |
| MNRC | 2005 | 346 | 21 | 12 | 49.443 | P | 0.200 | 0.449  |
| O05C | 2005 | 346 | 21 | 12 | 50.188 | P | 0.200 | 0.009  |
| CVS  | 2005 | 346 | 21 | 12 | 50.637 | P | 0.200 | -0.277 |
| FARB | 2005 | 346 | 21 | 12 | 50.865 | P | 0.200 | -0.398 |
| Q03C | 2005 | 346 | 21 | 12 | 52.341 | P | 0.200 | 0.982  |
| Q04C | 2005 | 346 | 21 | 12 | 52.914 | P | 0.200 | 0.095  |
| BRK  | 2005 | 346 | 21 | 12 | 53.175 | P | 0.200 | -0.308 |
| BKS  | 2005 | 346 | 21 | 12 | 53.408 | P | 0.200 | -0.076 |
| BRIB | 2005 | 346 | 21 | 12 | 53.750 | P | 0.200 | 0.175  |
| P05C | 2005 | 346 | 21 | 12 | 54.017 | P | 0.200 | -0.064 |
| BDM  | 2005 | 346 | 21 | 12 | 54.466 | P | 0.200 | -0.121 |
| LAVA | 2005 | 346 | 21 | 12 | 55.309 | P | 0.200 | -0.354 |
| BNLO | 2005 | 346 | 21 | 12 | 56.220 | P | 0.200 | -0.513 |
| WENL | 2005 | 346 | 21 | 12 | 56.221 | P | 0.200 | -0.107 |
| R04C | 2005 | 346 | 21 | 12 | 56.514 | P | 0.200 | -0.182 |
| MHC  | 2005 | 346 | 21 | 12 | 57.895 | P | 0.200 | -0.147 |
| S04C | 2005 | 346 | 21 | 12 | 58.305 | P | 0.200 | -0.149 |
| R05C | 2005 | 346 | 21 | 12 | 58.405 | P | 0.200 | -0.052 |
| SN95 | 2005 | 346 | 21 | 12 | 59.033 | P | 0.200 | -0.124 |
| CMB  | 2005 | 346 | 21 | 12 | 59.631 | P | 0.200 | -0.064 |
| SAO  | 2005 | 346 | 21 | 13 | 0.537  | P | 0.200 | -0.286 |
| SN85 | 2005 | 346 | 21 | 13 | 0.545  | P | 0.200 | -0.025 |
| SN86 | 2005 | 346 | 21 | 13 | 0.547  | P | 0.200 | 0.181  |
| PACP | 2005 | 346 | 21 | 13 | 0.560  | P | 0.200 | 0.035  |
| SN71 | 2005 | 346 | 21 | 13 | 0.618  | P | 0.200 | -0.545 |
| SN73 | 2005 | 346 | 21 | 13 | 1.303  | P | 0.200 | -0.335 |
| SN74 | 2005 | 346 | 21 | 13 | 1.508  | P | 0.200 | -0.228 |
| HAST | 2005 | 346 | 21 | 13 | 1.625  | P | 0.200 | -0.335 |
| R06C | 2005 | 346 | 21 | 13 | 1.697  | P | 0.200 | 0.324  |
| S05C | 2005 | 346 | 21 | 13 | 2.053  | P | 0.200 | -0.543 |
| SN76 | 2005 | 346 | 21 | 13 | 2.111  | P | 0.200 | 0.260  |
| S06C | 2005 | 346 | 21 | 13 | 2.214  | P | 0.200 | -0.195 |
| SN62 | 2005 | 346 | 21 | 13 | 2.516  | P | 0.200 | -0.430 |
| SN64 | 2005 | 346 | 21 | 13 | 3.301  | P | 0.200 | -0.097 |
| T05C | 2005 | 346 | 21 | 13 | 3.534  | P | 0.200 | 0.391  |
| SN51 | 2005 | 346 | 21 | 13 | 3.896  | P | 0.200 | 0.015  |

|      |      |     |    |    |        |   |       |        |
|------|------|-----|----|----|--------|---|-------|--------|
| SN52 | 2005 | 346 | 21 | 13 | 4.015  | P | 0.200 | -0.472 |
| SN53 | 2005 | 346 | 21 | 13 | 4.139  | P | 0.200 | -0.452 |
| SN54 | 2005 | 346 | 21 | 13 | 4.291  | P | 0.200 | -0.061 |
| SN55 | 2005 | 346 | 21 | 13 | 4.512  | P | 0.200 | 0.089  |
| V03C | 2005 | 346 | 21 | 13 | 4.623  | P | 0.200 | 0.204  |
| R07C | 2005 | 346 | 21 | 13 | 4.895  | P | 0.200 | 0.282  |
| SN57 | 2005 | 346 | 21 | 13 | 4.963  | P | 0.200 | 0.471  |
| U04C | 2005 | 346 | 21 | 13 | 5.133  | P | 0.200 | 0.267  |
| SN43 | 2005 | 346 | 21 | 13 | 5.466  | P | 0.200 | -0.283 |
| T06C | 2005 | 346 | 21 | 13 | 5.917  | P | 0.200 | -0.280 |
| SN44 | 2005 | 346 | 21 | 13 | 6.001  | P | 0.200 | 0.003  |
| SN45 | 2005 | 346 | 21 | 13 | 6.227  | P | 0.200 | 0.209  |
| SN48 | 2005 | 346 | 21 | 13 | 6.247  | P | 0.200 | 0.272  |
| MNV  | 2005 | 346 | 21 | 13 | 6.421  | P | 0.200 | 0.191  |
| SN47 | 2005 | 346 | 21 | 13 | 6.497  | P | 0.200 | 0.334  |
| SN46 | 2005 | 346 | 21 | 13 | 6.767  | P | 0.200 | 0.384  |
| SN22 | 2005 | 346 | 21 | 13 | 7.146  | P | 0.200 | -0.432 |
| PKD  | 2005 | 346 | 21 | 13 | 7.196  | P | 0.200 | -0.189 |
| SN34 | 2005 | 346 | 21 | 13 | 7.250  | P | 0.200 | -0.107 |
| SN23 | 2005 | 346 | 21 | 13 | 7.469  | P | 0.200 | -0.337 |
| SN38 | 2005 | 346 | 21 | 13 | 7.486  | P | 0.200 | 0.389  |
| V04C | 2005 | 346 | 21 | 13 | 7.517  | P | 0.200 | 0.246  |
| RAMR | 2005 | 346 | 21 | 13 | 7.517  | P | 0.200 | 0.248  |
| SN37 | 2005 | 346 | 21 | 13 | 7.589  | P | 0.200 | 0.196  |
| U05C | 2005 | 346 | 21 | 13 | 7.733  | P | 0.200 | 0.548  |
| SN36 | 2005 | 346 | 21 | 13 | 7.762  | P | 0.200 | 0.263  |
| SN11 | 2005 | 346 | 21 | 13 | 8.044  | P | 0.200 | -0.660 |
| SN28 | 2005 | 346 | 21 | 13 | 8.683  | P | 0.200 | 0.417  |
| SN25 | 2005 | 346 | 21 | 13 | 8.740  | P | 0.200 | 0.035  |
| SN26 | 2005 | 346 | 21 | 13 | 8.812  | P | 0.200 | 0.437  |
| HELL | 2005 | 346 | 21 | 13 | 9.445  | P | 0.200 | -0.582 |
| SN15 | 2005 | 346 | 21 | 13 | 9.580  | P | 0.200 | 0.222  |
| RCT  | 2005 | 346 | 21 | 13 | 9.987  | P | 0.200 | -0.455 |
| V05C | 2005 | 346 | 21 | 13 | 10.256 | P | 0.200 | 0.429  |
| TPH  | 2005 | 346 | 21 | 13 | 10.966 | P | 0.200 | -0.007 |
| TIN  | 2005 | 346 | 21 | 13 | 11.660 | P | 0.200 | 0.201  |
| VES  | 2005 | 346 | 21 | 13 | 12.026 | P | 0.200 | -0.927 |
| SMM  | 2005 | 346 | 21 | 13 | 12.038 | P | 0.200 | 0.215  |
| CWC  | 2005 | 346 | 21 | 13 | 14.257 | P | 0.200 | -0.160 |
| MPP  | 2005 | 346 | 21 | 13 | 14.407 | P | 0.200 | 0.154  |
| ISA  | 2005 | 346 | 21 | 13 | 14.882 | P | 0.200 | -0.926 |
| GRA  | 2005 | 346 | 21 | 13 | 14.894 | P | 0.200 | 0.465  |
| ARV  | 2005 | 346 | 21 | 13 | 15.977 | P | 0.200 | -0.630 |
| SBC  | 2005 | 346 | 21 | 13 | 16.259 | P | 0.200 | 0.045  |
| SCZ2 | 2005 | 346 | 21 | 13 | 17.731 | P | 0.200 | -0.417 |
| MPM  | 2005 | 346 | 21 | 13 | 17.817 | P | 0.200 | -0.171 |
| FUR  | 2005 | 346 | 21 | 13 | 18.415 | P | 0.200 | 0.292  |
| TPNV | 2005 | 346 | 21 | 13 | 18.659 | P | 0.200 | -0.064 |
| OSI  | 2005 | 346 | 21 | 13 | 19.007 | P | 0.200 | -0.146 |
| LGU  | 2005 | 346 | 21 | 13 | 19.169 | P | 0.200 | -0.721 |
| LRL  | 2005 | 346 | 21 | 13 | 19.170 | P | 0.200 | -0.296 |
| EDW2 | 2005 | 346 | 21 | 13 | 20.477 | P | 0.200 | -0.053 |
| DEC  | 2005 | 346 | 21 | 13 | 21.337 | P | 0.200 | -0.547 |
| SHO  | 2005 | 346 | 21 | 13 | 22.510 | P | 0.200 | -0.068 |
| GSC  | 2005 | 346 | 21 | 13 | 22.994 | P | 0.200 | -0.122 |
| FMP  | 2005 | 346 | 21 | 13 | 23.583 | P | 0.200 | -0.346 |
| BFS  | 2005 | 346 | 21 | 13 | 23.853 | P | 0.200 | -0.525 |
| RRX  | 2005 | 346 | 21 | 13 | 24.057 | P | 0.200 | 0.038  |
| CIA  | 2005 | 346 | 21 | 13 | 24.269 | P | 0.200 | -0.646 |
| TUQ  | 2005 | 346 | 21 | 13 | 25.675 | P | 0.200 | 0.058  |
| BBR  | 2005 | 346 | 21 | 13 | 26.462 | P | 0.200 | -0.617 |
| HEC  | 2005 | 346 | 21 | 13 | 26.504 | P | 0.200 | -0.108 |

|      |      |     |    |         |          |           |         |        |        |
|------|------|-----|----|---------|----------|-----------|---------|--------|--------|
| 2006 | 138  | 23  | 4  | 45.2808 | 54.62700 | 163.85699 | 30.0000 | 129    | -0.009 |
| I03A | 2006 | 138 | 23 | 13      | 10.369   | P         | 0.200   | 0.089  |        |
| J02A | 2006 | 138 | 23 | 13      | 12.275   | P         | 0.200   | 0.140  |        |
| J03A | 2006 | 138 | 23 | 13      | 15.023   | P         | 0.200   | 0.319  |        |
| DBO  | 2006 | 138 | 23 | 13      | 15.060   | P         | 0.200   | 0.136  |        |
| L02A | 2006 | 138 | 23 | 13      | 18.305   | P         | 0.200   | 0.107  |        |
| HUMO | 2006 | 138 | 23 | 13      | 18.767   | P         | 0.200   | 0.093  |        |
| JCC  | 2006 | 138 | 23 | 13      | 23.432   | P         | 0.200   | 0.250  |        |
| YBH  | 2006 | 138 | 23 | 13      | 24.627   | P         | 0.200   | 0.382  |        |
| M02C | 2006 | 138 | 23 | 13      | 25.918   | P         | 0.200   | 0.559  |        |
| N02C | 2006 | 138 | 23 | 13      | 26.382   | P         | 0.200   | 0.032  |        |
| M04C | 2006 | 138 | 23 | 13      | 27.785   | P         | 0.200   | -0.049 |        |
| O01C | 2006 | 138 | 23 | 13      | 28.320   | P         | 0.200   | 0.714  |        |
| M03C | 2006 | 138 | 23 | 13      | 29.056   | P         | 0.200   | -0.168 |        |
| WDC  | 2006 | 138 | 23 | 13      | 30.767   | P         | 0.200   | -0.069 |        |
| O02C | 2006 | 138 | 23 | 13      | 32.358   | P         | 0.200   | 0.313  |        |
| M05C | 2006 | 138 | 23 | 13      | 32.909   | P         | 0.200   | -0.067 |        |
| P01C | 2006 | 138 | 23 | 13      | 33.251   | P         | 0.200   | 0.038  |        |
| HATC | 2006 | 138 | 23 | 13      | 34.385   | P         | 0.200   | -0.007 |        |
| O03C | 2006 | 138 | 23 | 13      | 35.469   | P         | 0.200   | -0.613 |        |
| GASB | 2006 | 138 | 23 | 13      | 35.540   | P         | 0.200   | 0.407  |        |
| M06C | 2006 | 138 | 23 | 13      | 36.574   | P         | 0.200   | -0.048 |        |
| HOPS | 2006 | 138 | 23 | 13      | 36.728   | P         | 0.200   | -0.210 |        |
| O04C | 2006 | 138 | 23 | 13      | 38.644   | P         | 0.200   | 0.028  |        |
| ELFS | 2006 | 138 | 23 | 13      | 38.854   | P         | 0.200   | 0.335  |        |
| ORV  | 2006 | 138 | 23 | 13      | 39.628   | P         | 0.200   | -1.043 |        |
| SUTB | 2006 | 138 | 23 | 13      | 40.117   | P         | 0.200   | -1.023 |        |
| MNRC | 2006 | 138 | 23 | 13      | 40.564   | P         | 0.200   | 0.265  |        |
| O05C | 2006 | 138 | 23 | 13      | 41.063   | P         | 0.200   | -0.004 |        |
| M07A | 2006 | 138 | 23 | 13      | 41.079   | P         | 0.200   | -0.013 |        |
| MCCM | 2006 | 138 | 23 | 13      | 41.455   | P         | 0.200   | -0.576 |        |
| CVS  | 2006 | 138 | 23 | 13      | 42.495   | P         | 0.200   | -0.434 |        |
| FARB | 2006 | 138 | 23 | 13      | 43.393   | P         | 0.200   | -0.474 |        |
| BEK  | 2006 | 138 | 23 | 13      | 43.655   | P         | 0.200   | -0.457 |        |
| Q03C | 2006 | 138 | 23 | 13      | 44.067   | P         | 0.200   | 0.820  |        |
| O06A | 2006 | 138 | 23 | 13      | 44.525   | P         | 0.200   | -0.137 |        |
| N07B | 2006 | 138 | 23 | 13      | 44.851   | P         | 0.200   | -0.224 |        |
| P05C | 2006 | 138 | 23 | 13      | 45.546   | P         | 0.200   | -0.401 |        |
| BRK  | 2006 | 138 | 23 | 13      | 45.761   | P         | 0.200   | -0.466 |        |
| BKS  | 2006 | 138 | 23 | 13      | 46.054   | P         | 0.200   | -0.211 |        |
| P06A | 2006 | 138 | 23 | 13      | 46.956   | P         | 0.200   | 0.117  |        |
| LAVA | 2006 | 138 | 23 | 13      | 47.651   | P         | 0.200   | -0.456 |        |
| JRSC | 2006 | 138 | 23 | 13      | 48.227   | P         | 0.200   | -0.555 |        |
| N08A | 2006 | 138 | 23 | 13      | 48.398   | P         | 0.200   | -0.148 |        |
| O07A | 2006 | 138 | 23 | 13      | 48.639   | P         | 0.200   | -0.028 |        |
| R04C | 2006 | 138 | 23 | 13      | 49.231   | P         | 0.200   | -0.473 |        |
| WCN  | 2006 | 138 | 23 | 13      | 49.557   | P         | 0.200   | 0.020  |        |
| WENL | 2006 | 138 | 23 | 13      | 49.562   | P         | 0.200   | -0.121 |        |
| BNLO | 2006 | 138 | 23 | 13      | 49.741   | P         | 0.200   | -0.777 |        |
| O08A | 2006 | 138 | 23 | 13      | 51.147   | P         | 0.200   | 0.125  |        |
| MHC  | 2006 | 138 | 23 | 13      | 51.618   | P         | 0.200   | -0.187 |        |
| P07A | 2006 | 138 | 23 | 13      | 51.912   | P         | 0.200   | 0.032  |        |
| S04C | 2006 | 138 | 23 | 13      | 52.032   | P         | 0.200   | -0.113 |        |
| CMB  | 2006 | 138 | 23 | 13      | 53.294   | P         | 0.200   | 0.003  |        |
| SN84 | 2006 | 138 | 23 | 13      | 53.558   | P         | 0.200   | -0.347 |        |
| SN85 | 2006 | 138 | 23 | 13      | 54.088   | P         | 0.200   | 0.006  |        |
| SN71 | 2006 | 138 | 23 | 13      | 54.877   | P         | 0.200   | -0.333 |        |
| P08A | 2006 | 138 | 23 | 13      | 54.940   | P         | 0.200   | 0.585  |        |
| PACP | 2006 | 138 | 23 | 13      | 54.965   | P         | 0.200   | 0.019  |        |
| R06C | 2006 | 138 | 23 | 13      | 55.083   | P         | 0.200   | 0.205  |        |
| SAO  | 2006 | 138 | 23 | 13      | 55.227   | P         | 0.200   | -0.254 |        |
| Q07A | 2006 | 138 | 23 | 13      | 55.425   | P         | 0.200   | 0.229  |        |
| SN73 | 2006 | 138 | 23 | 13      | 55.444   | P         | 0.200   | -0.220 |        |

|      |      |     |    |    |        |   |       |        |
|------|------|-----|----|----|--------|---|-------|--------|
| SN76 | 2006 | 138 | 23 | 13 | 55.812 | P | 0.200 | 0.276  |
| O09A | 2006 | 138 | 23 | 13 | 55.917 | P | 0.200 | 0.423  |
| S06C | 2006 | 138 | 23 | 13 | 56.380 | P | 0.200 | -0.128 |
| S05C | 2006 | 138 | 23 | 13 | 56.587 | P | 0.200 | -0.523 |
| HAST | 2006 | 138 | 23 | 13 | 56.767 | P | 0.200 | -0.276 |
| SN62 | 2006 | 138 | 23 | 13 | 56.919 | P | 0.200 | -0.415 |
| SN66 | 2006 | 138 | 23 | 13 | 57.424 | P | 0.200 | 0.155  |
| SN64 | 2006 | 138 | 23 | 13 | 57.553 | P | 0.200 | -0.049 |
| SN67 | 2006 | 138 | 23 | 13 | 57.637 | P | 0.200 | 0.230  |
| SN51 | 2006 | 138 | 23 | 13 | 58.853 | P | 0.200 | 0.170  |
| SN55 | 2006 | 138 | 23 | 13 | 58.879 | P | 0.200 | 0.055  |
| SN54 | 2006 | 138 | 23 | 13 | 58.886 | P | 0.200 | 0.088  |
| SN52 | 2006 | 138 | 23 | 13 | 58.992 | P | 0.200 | -0.310 |
| R07C | 2006 | 138 | 23 | 13 | 59.214 | P | 0.200 | 0.347  |
| SN57 | 2006 | 138 | 23 | 13 | 59.311 | P | 0.200 | 0.532  |
| P09A | 2006 | 138 | 23 | 13 | 59.321 | P | 0.200 | 0.324  |
| Q08A | 2006 | 138 | 23 | 13 | 59.476 | P | 0.200 | 0.130  |
| V03C | 2006 | 138 | 23 | 14 | 0.373  | P | 0.200 | 0.176  |
| MNV  | 2006 | 138 | 23 | 14 | 0.744  | P | 0.200 | 0.145  |
| SN48 | 2006 | 138 | 23 | 14 | 0.755  | P | 0.200 | 0.328  |
| U04C | 2006 | 138 | 23 | 14 | 0.814  | P | 0.200 | 0.395  |
| SN44 | 2006 | 138 | 23 | 14 | 1.181  | P | 0.200 | 0.290  |
| SN47 | 2006 | 138 | 23 | 14 | 1.240  | P | 0.200 | 0.504  |
| T06C | 2006 | 138 | 23 | 14 | 1.288  | P | 0.200 | -0.187 |
| R08A | 2006 | 138 | 23 | 14 | 1.472  | P | 0.200 | 0.299  |
| SN46 | 2006 | 138 | 23 | 14 | 1.756  | P | 0.200 | 0.632  |
| SN38 | 2006 | 138 | 23 | 14 | 2.262  | P | 0.200 | 0.407  |
| SN21 | 2006 | 138 | 23 | 14 | 2.824  | P | 0.200 | -0.459 |
| SN37 | 2006 | 138 | 23 | 14 | 2.845  | P | 0.200 | 0.534  |
| Q09A | 2006 | 138 | 23 | 14 | 2.970  | P | 0.200 | 0.488  |
| SN36 | 2006 | 138 | 23 | 14 | 3.027  | P | 0.200 | 0.483  |
| SN23 | 2006 | 138 | 23 | 14 | 3.069  | P | 0.200 | -0.139 |
| PKD  | 2006 | 138 | 23 | 14 | 3.412  | P | 0.200 | -0.174 |
| U05C | 2006 | 138 | 23 | 14 | 3.905  | P | 0.200 | 0.759  |
| SN28 | 2006 | 138 | 23 | 14 | 4.020  | P | 0.200 | 0.679  |
| V04C | 2006 | 138 | 23 | 14 | 4.027  | P | 0.200 | 0.275  |
| SN11 | 2006 | 138 | 23 | 14 | 4.186  | P | 0.200 | -0.465 |
| SN26 | 2006 | 138 | 23 | 14 | 4.311  | P | 0.200 | 0.644  |
| SN25 | 2006 | 138 | 23 | 14 | 4.330  | P | 0.200 | 0.218  |
| SN15 | 2006 | 138 | 23 | 14 | 5.385  | P | 0.200 | 0.461  |
| HELL | 2006 | 138 | 23 | 14 | 5.624  | P | 0.200 | -0.518 |
| S08C | 2006 | 138 | 23 | 14 | 6.133  | P | 0.200 | 0.498  |
| TPH  | 2006 | 138 | 23 | 14 | 6.347  | P | 0.200 | -0.041 |
| SN16 | 2006 | 138 | 23 | 14 | 6.366  | P | 0.200 | 0.439  |
| RCT  | 2006 | 138 | 23 | 14 | 6.579  | P | 0.200 | -0.344 |
| V05C | 2006 | 138 | 23 | 14 | 7.117  | P | 0.200 | 0.595  |
| TIN  | 2006 | 138 | 23 | 14 | 7.914  | P | 0.200 | 0.404  |
| S09A | 2006 | 138 | 23 | 14 | 8.212  | P | 0.200 | 0.045  |
| VES  | 2006 | 138 | 23 | 14 | 9.464  | P | 0.200 | -0.623 |
| SMM  | 2006 | 138 | 23 | 14 | 9.486  | P | 0.200 | 0.296  |
| SDP  | 2006 | 138 | 23 | 14 | 10.842 | P | 0.200 | -0.251 |
| CWC  | 2006 | 138 | 23 | 14 | 11.482 | P | 0.200 | 0.122  |
| MPP  | 2006 | 138 | 23 | 14 | 12.623 | P | 0.200 | 0.324  |
| ISA  | 2006 | 138 | 23 | 14 | 12.840 | P | 0.200 | -0.713 |
| ARV  | 2006 | 138 | 23 | 14 | 14.045 | P | 0.200 | -0.820 |
| SBC  | 2006 | 138 | 23 | 14 | 15.030 | P | 0.200 | 0.150  |
| MPM  | 2006 | 138 | 23 | 14 | 15.822 | P | 0.200 | 0.100  |
| FUR  | 2006 | 138 | 23 | 14 | 16.165 | P | 0.200 | 0.384  |
| TPNV | 2006 | 138 | 23 | 14 | 16.223 | P | 0.200 | 0.108  |
| SCZ2 | 2006 | 138 | 23 | 14 | 17.248 | P | 0.200 | -0.240 |
| LRL  | 2006 | 138 | 23 | 14 | 17.610 | P | 0.200 | -0.276 |
| LGU  | 2006 | 138 | 23 | 14 | 18.825 | P | 0.200 | -0.509 |
| EDW2 | 2006 | 138 | 23 | 14 | 19.525 | P | 0.200 | -0.041 |

|      |      |     |    |    |        |   |       |        |
|------|------|-----|----|----|--------|---|-------|--------|
| DJJ  | 2006 | 138 | 23 | 14 | 21.164 | P | 0.200 | -0.563 |
| DEC  | 2006 | 138 | 23 | 14 | 21.233 | P | 0.200 | -0.300 |
| SHO  | 2006 | 138 | 23 | 14 | 21.323 | P | 0.200 | 0.037  |
| SNCC | 2006 | 138 | 23 | 14 | 21.728 | P | 0.200 | -0.259 |
| GSC  | 2006 | 138 | 23 | 14 | 22.312 | P | 0.200 | 0.055  |
| CHF  | 2006 | 138 | 23 | 14 | 22.409 | P | 0.200 | -0.058 |
| MWC  | 2006 | 138 | 23 | 14 | 22.752 | P | 0.200 | -0.276 |
| RRX  | 2006 | 138 | 23 | 14 | 23.719 | P | 0.200 | 0.097  |
| ADO  | 2006 | 138 | 23 | 14 | 23.909 | P | 0.200 | 0.156  |
| FMP  | 2006 | 138 | 23 | 14 | 24.075 | P | 0.200 | -0.280 |
| BFS  | 2006 | 138 | 23 | 14 | 24.233 | P | 0.200 | -0.195 |
| TUQ  | 2006 | 138 | 23 | 14 | 25.185 | P | 0.200 | 0.051  |
| CIA  | 2006 | 138 | 23 | 14 | 25.317 | P | 0.200 | -0.348 |
| BBR  | 2006 | 138 | 23 | 14 | 27.267 | P | 0.200 | -0.191 |

|      |      |     |    |         |          |           |          |        |       |
|------|------|-----|----|---------|----------|-----------|----------|--------|-------|
| 2006 | 259  | 2   | 22 | 50.2169 | 41.36400 | 135.69701 | 367.2000 | 217    | 0.018 |
| I03A | 2006 | 259 | 2  | 33      | 19.888   | P         | 0.200    | 0.571  |       |
| J03A | 2006 | 259 | 2  | 33      | 23.367   | P         | 0.200    | 0.693  |       |
| JCC  | 2006 | 259 | 2  | 33      | 29.033   | P         | 0.200    | 0.628  |       |
| J05A | 2006 | 259 | 2  | 33      | 29.532   | P         | 0.200    | 0.523  |       |
| K04A | 2006 | 259 | 2  | 33      | 30.038   | P         | 0.200    | 0.210  |       |
| YBH  | 2006 | 259 | 2  | 33      | 30.386   | P         | 0.200    | 0.679  |       |
| L04A | 2006 | 259 | 2  | 33      | 31.190   | P         | 0.200    | 0.279  |       |
| M02C | 2006 | 259 | 2  | 33      | 31.261   | P         | 0.200    | 0.800  |       |
| N02C | 2006 | 259 | 2  | 33      | 31.463   | P         | 0.200    | 0.477  |       |
| O01C | 2006 | 259 | 2  | 33      | 32.445   | P         | 0.200    | 0.806  |       |
| M04C | 2006 | 259 | 2  | 33      | 32.841   | P         | 0.200    | 0.181  |       |
| K05A | 2006 | 259 | 2  | 33      | 32.892   | P         | 0.200    | 0.567  |       |
| M03C | 2006 | 259 | 2  | 33      | 33.629   | P         | 0.200    | 0.056  |       |
| WDC  | 2006 | 259 | 2  | 33      | 34.731   | P         | 0.200    | 0.235  |       |
| L05A | 2006 | 259 | 2  | 33      | 35.504   | P         | 0.200    | 0.353  |       |
| O02C | 2006 | 259 | 2  | 33      | 35.827   | P         | 0.200    | 0.460  |       |
| P01C | 2006 | 259 | 2  | 33      | 36.039   | P         | 0.200    | 0.167  |       |
| M05C | 2006 | 259 | 2  | 33      | 36.642   | P         | 0.200    | 0.004  |       |
| HATC | 2006 | 259 | 2  | 33      | 37.610   | P         | 0.200    | 0.077  |       |
| GASB | 2006 | 259 | 2  | 33      | 38.274   | P         | 0.200    | 0.663  |       |
| O03C | 2006 | 259 | 2  | 33      | 38.419   | P         | 0.200    | -0.100 |       |
| M06C | 2006 | 259 | 2  | 33      | 39.679   | P         | 0.200    | 0.194  |       |
| SNG5 | 2006 | 259 | 2  | 33      | 40.744   | P         | 0.200    | -0.554 |       |
| L07A | 2006 | 259 | 2  | 33      | 40.733   | P         | 0.200    | 0.424  |       |
| O04C | 2006 | 259 | 2  | 33      | 40.898   | P         | 0.200    | 0.167  |       |
| ELFS | 2006 | 259 | 2  | 33      | 41.091   | P         | 0.200    | 0.328  |       |
| ORV  | 2006 | 259 | 2  | 33      | 41.300   | P         | 0.200    | -0.759 |       |
| SUTB | 2006 | 259 | 2  | 33      | 41.533   | P         | 0.200    | -0.695 |       |
| SNF6 | 2006 | 259 | 2  | 33      | 42.571   | P         | 0.200    | -0.495 |       |
| MNRC | 2006 | 259 | 2  | 33      | 41.815   | P         | 0.200    | 0.390  |       |
| MCCM | 2006 | 259 | 2  | 33      | 41.913   | P         | 0.200    | -0.398 |       |
| SNE4 | 2006 | 259 | 2  | 33      | 43.464   | P         | 0.200    | -0.108 |       |
| O05C | 2006 | 259 | 2  | 33      | 42.612   | P         | 0.200    | 0.114  |       |
| SNE5 | 2006 | 259 | 2  | 33      | 43.643   | P         | 0.200    | -0.315 |       |
| SNE7 | 2006 | 259 | 2  | 33      | 43.695   | P         | 0.200    | -0.169 |       |
| CVS  | 2006 | 259 | 2  | 33      | 42.994   | P         | 0.200    | -0.235 |       |
| SNE6 | 2006 | 259 | 2  | 33      | 44.068   | P         | 0.200    | -0.664 |       |
| FARB | 2006 | 259 | 2  | 33      | 43.094   | P         | 0.200    | -0.453 |       |
| N06A | 2006 | 259 | 2  | 33      | 43.398   | P         | 0.200    | 0.049  |       |
| M07A | 2006 | 259 | 2  | 33      | 43.427   | P         | 0.200    | 0.350  |       |
| SND7 | 2006 | 259 | 2  | 33      | 44.833   | P         | 0.200    | -0.201 |       |
| SND5 | 2006 | 259 | 2  | 33      | 44.990   | P         | 0.200    | -0.375 |       |
| Q03C | 2006 | 259 | 2  | 33      | 44.565   | P         | 0.200    | 0.927  |       |
| BEK  | 2006 | 259 | 2  | 33      | 44.609   | P         | 0.200    | -0.420 |       |
| SND4 | 2006 | 259 | 2  | 33      | 44.763   | P         | 0.200    | -0.351 |       |
| SND8 | 2006 | 259 | 2  | 33      | 46.022   | P         | 0.200    | -0.161 |       |
| Q04C | 2006 | 259 | 2  | 33      | 45.094   | P         | 0.200    | 0.091  |       |



|      |      |     |   |    |        |   |       |        |
|------|------|-----|---|----|--------|---|-------|--------|
| SNC5 | 2006 | 259 | 2 | 33 | 46.216 | P | 0.200 | -0.305 |
| SNC4 | 2006 | 259 | 2 | 33 | 46.217 | P | 0.200 | -0.340 |
| BRK  | 2006 | 259 | 2 | 33 | 45.332 | P | 0.200 | -0.320 |
| BKS  | 2006 | 259 | 2 | 33 | 45.511 | P | 0.200 | -0.130 |
| BRIB | 2006 | 259 | 2 | 33 | 45.694 | P | 0.200 | -0.030 |
| SNC7 | 2006 | 259 | 2 | 33 | 46.779 | P | 0.200 | -0.216 |
| P05C | 2006 | 259 | 2 | 33 | 46.182 | P | 0.200 | -0.013 |
| N07B | 2006 | 259 | 2 | 33 | 46.188 | P | 0.200 | 0.110  |
| SNC6 | 2006 | 259 | 2 | 33 | 47.462 | P | 0.200 | -0.102 |
| SNB3 | 2006 | 259 | 2 | 33 | 47.547 | P | 0.200 | 0.073  |
| BDM  | 2006 | 259 | 2 | 33 | 46.806 | P | 0.200 | 0.123  |
| SNB5 | 2006 | 259 | 2 | 33 | 47.896 | P | 0.200 | -0.189 |
| SNC3 | 2006 | 259 | 2 | 33 | 46.971 | P | 0.200 | 0.856  |
| P06A | 2006 | 259 | 2 | 33 | 47.161 | P | 0.200 | 0.130  |
| LAVA | 2006 | 259 | 2 | 33 | 47.382 | P | 0.200 | -0.305 |
| SNB7 | 2006 | 259 | 2 | 33 | 48.700 | P | 0.200 | -0.094 |
| BNLO | 2006 | 259 | 2 | 33 | 48.090 | P | 0.200 | -0.612 |
| SNA4 | 2006 | 259 | 2 | 33 | 49.121 | P | 0.200 | -0.199 |
| WENL | 2006 | 259 | 2 | 33 | 48.213 | P | 0.200 | -0.102 |
| SNA3 | 2006 | 259 | 2 | 33 | 49.226 | P | 0.200 | 0.144  |
| R04C | 2006 | 259 | 2 | 33 | 48.470 | P | 0.200 | -0.174 |
| O07A | 2006 | 259 | 2 | 33 | 48.932 | P | 0.200 | 0.203  |
| SNA7 | 2006 | 259 | 2 | 33 | 49.986 | P | 0.200 | 0.261  |
| N08A | 2006 | 259 | 2 | 33 | 49.019 | P | 0.200 | 0.171  |
| WCN  | 2006 | 259 | 2 | 33 | 49.299 | P | 0.200 | 0.205  |
| SNA8 | 2006 | 259 | 2 | 33 | 50.634 | P | 0.200 | 0.184  |
| MHC  | 2006 | 259 | 2 | 33 | 49.848 | P | 0.200 | -0.101 |
| SN97 | 2006 | 259 | 2 | 33 | 50.930 | P | 0.200 | 0.155  |
| S04C | 2006 | 259 | 2 | 33 | 50.126 | P | 0.200 | -0.207 |
| R05C | 2006 | 259 | 2 | 33 | 50.272 | P | 0.200 | -0.044 |
| SN93 | 2006 | 259 | 2 | 33 | 50.737 | P | 0.200 | 0.529  |
| O08A | 2006 | 259 | 2 | 33 | 51.108 | P | 0.200 | 0.494  |
| CMB  | 2006 | 259 | 2 | 33 | 51.367 | P | 0.200 | -0.107 |
| SN96 | 2006 | 259 | 2 | 33 | 51.385 | P | 0.200 | 0.067  |
| P07A | 2006 | 259 | 2 | 33 | 51.433 | P | 0.200 | 0.320  |
| SAO  | 2006 | 259 | 2 | 33 | 52.311 | P | 0.200 | -0.238 |
| PACP | 2006 | 259 | 2 | 33 | 52.359 | P | 0.200 | 0.086  |
| HAST | 2006 | 259 | 2 | 33 | 53.289 | P | 0.200 | -0.343 |
| R06C | 2006 | 259 | 2 | 33 | 53.337 | P | 0.200 | 0.278  |
| BMN  | 2006 | 259 | 2 | 33 | 53.391 | P | 0.200 | 0.257  |
| S05C | 2006 | 259 | 2 | 33 | 53.671 | P | 0.200 | -0.550 |
| S06C | 2006 | 259 | 2 | 33 | 53.749 | P | 0.200 | -0.299 |
| Q07A | 2006 | 259 | 2 | 33 | 53.762 | P | 0.200 | 0.340  |
| P08A | 2006 | 259 | 2 | 33 | 53.802 | P | 0.200 | 0.718  |
| O09A | 2006 | 259 | 2 | 33 | 54.682 | P | 0.200 | 0.600  |
| SN55 | 2006 | 259 | 2 | 33 | 56.034 | P | 0.200 | 0.086  |
| T05C | 2006 | 259 | 2 | 33 | 55.124 | P | 0.200 | 0.379  |
| SN43 | 2006 | 259 | 2 | 33 | 56.865 | P | 0.200 | -0.346 |
| R07C | 2006 | 259 | 2 | 33 | 56.351 | P | 0.200 | 0.214  |
| U04C | 2006 | 259 | 2 | 33 | 56.723 | P | 0.200 | 0.362  |
| Q08A | 2006 | 259 | 2 | 33 | 56.775 | P | 0.200 | -0.039 |
| P09A | 2006 | 259 | 2 | 33 | 56.933 | P | 0.200 | 0.186  |
| T06C | 2006 | 259 | 2 | 33 | 57.223 | P | 0.200 | -0.394 |
| R08A | 2006 | 259 | 2 | 33 | 58.325 | P | 0.200 | 0.350  |
| PKD  | 2006 | 259 | 2 | 33 | 58.537 | P | 0.200 | -0.196 |
| P10A | 2006 | 259 | 2 | 33 | 58.831 | P | 0.200 | 0.111  |
| RAMR | 2006 | 259 | 2 | 33 | 58.957 | P | 0.200 | 0.345  |
| MLAC | 2006 | 259 | 2 | 33 | 58.962 | P | 0.200 | 0.453  |
| U05C | 2006 | 259 | 2 | 33 | 59.024 | P | 0.200 | 0.500  |
| Q09A | 2006 | 259 | 2 | 33 | 59.403 | P | 0.200 | 0.202  |
| HELL | 2006 | 259 | 2 | 34 | 0.577  | P | 0.200 | -0.630 |
| PHL  | 2006 | 259 | 2 | 34 | 0.604  | P | 0.200 | 0.064  |
| RCT  | 2006 | 259 | 2 | 34 | 1.080  | P | 0.200 | -0.505 |

|      |      |     |   |    |        |   |       |        |
|------|------|-----|---|----|--------|---|-------|--------|
| V05C | 2006 | 259 | 2 | 34 | 1.391  | P | 0.200 | 0.384  |
| S08C | 2006 | 259 | 2 | 34 | 1.540  | P | 0.200 | 0.297  |
| R09A | 2006 | 259 | 2 | 34 | 1.789  | P | 0.200 | -0.074 |
| TPH  | 2006 | 259 | 2 | 34 | 1.972  | P | 0.200 | -0.106 |
| TIN  | 2006 | 259 | 2 | 34 | 2.755  | P | 0.200 | 0.190  |
| VES  | 2006 | 259 | 2 | 34 | 2.827  | P | 0.200 | -1.146 |
| SMM  | 2006 | 259 | 2 | 34 | 3.063  | P | 0.200 | 0.153  |
| S09A | 2006 | 259 | 2 | 34 | 3.378  | P | 0.200 | 0.043  |
| Q11A | 2006 | 259 | 2 | 34 | 4.118  | P | 0.200 | -0.074 |
| R10A | 2006 | 259 | 2 | 34 | 4.417  | P | 0.200 | 0.162  |
| CWC  | 2006 | 259 | 2 | 34 | 5.129  | P | 0.200 | -0.227 |
| MPP  | 2006 | 259 | 2 | 34 | 5.292  | P | 0.200 | 0.088  |
| ISA  | 2006 | 259 | 2 | 34 | 5.559  | P | 0.200 | -1.082 |
| GRA  | 2006 | 259 | 2 | 34 | 5.738  | P | 0.200 | 0.410  |
| BAK  | 2006 | 259 | 2 | 34 | 6.343  | P | 0.200 | 0.674  |
| ARV  | 2006 | 259 | 2 | 34 | 6.755  | P | 0.200 | -0.629 |
| MPM  | 2006 | 259 | 2 | 34 | 8.523  | P | 0.200 | -0.175 |
| FUR  | 2006 | 259 | 2 | 34 | 8.979  | P | 0.200 | 0.205  |
| OSI  | 2006 | 259 | 2 | 34 | 9.641  | P | 0.200 | -0.145 |
| SLA  | 2006 | 259 | 2 | 34 | 9.758  | P | 0.200 | -0.142 |
| LRL  | 2006 | 259 | 2 | 34 | 9.782  | P | 0.200 | -0.285 |
| TOV  | 2006 | 259 | 2 | 34 | 10.348 | P | 0.200 | -0.708 |
| EDW2 | 2006 | 259 | 2 | 34 | 11.016 | P | 0.200 | -0.040 |
| U10A | 2006 | 259 | 2 | 34 | 11.364 | P | 0.200 | 0.597  |
| DJJ  | 2006 | 259 | 2 | 34 | 11.740 | P | 0.200 | -0.636 |
| DEC  | 2006 | 259 | 2 | 34 | 11.801 | P | 0.200 | -0.548 |
| VCS  | 2006 | 259 | 2 | 34 | 12.119 | P | 0.200 | -0.158 |
| PAS  | 2006 | 259 | 2 | 34 | 12.520 | P | 0.200 | -0.737 |
| CHF  | 2006 | 259 | 2 | 34 | 12.871 | P | 0.200 | -0.258 |
| SHO  | 2006 | 259 | 2 | 34 | 12.914 | P | 0.200 | -0.064 |
| MWC  | 2006 | 259 | 2 | 34 | 12.916 | P | 0.200 | -0.667 |
| GSC  | 2006 | 259 | 2 | 34 | 13.325 | P | 0.200 | -0.172 |
| BFS  | 2006 | 259 | 2 | 34 | 14.068 | P | 0.200 | -0.627 |
| ADO  | 2006 | 259 | 2 | 34 | 14.157 | P | 0.200 | -0.189 |
| VTV  | 2006 | 259 | 2 | 34 | 14.208 | P | 0.200 | -0.271 |
| U11A | 2006 | 259 | 2 | 34 | 14.294 | P | 0.200 | 0.479  |
| RRX  | 2006 | 259 | 2 | 34 | 14.329 | P | 0.200 | -0.008 |
| CIA  | 2006 | 259 | 2 | 34 | 14.545 | P | 0.200 | -0.656 |
| TUQ  | 2006 | 259 | 2 | 34 | 15.896 | P | 0.200 | 0.067  |
| V11A | 2006 | 259 | 2 | 34 | 16.065 | P | 0.200 | 0.056  |
| SVD  | 2006 | 259 | 2 | 34 | 16.420 | P | 0.200 | -0.578 |
| BBR  | 2006 | 259 | 2 | 34 | 16.572 | P | 0.200 | -0.679 |
| HEC  | 2006 | 259 | 2 | 34 | 16.621 | P | 0.200 | -0.163 |

|      |      |     |    |         |          |            |         |        |       |
|------|------|-----|----|---------|----------|------------|---------|--------|-------|
| 2006 | 244  | 12  | 4  | 23.0479 | 53.97000 | -166.39200 | 75.6000 | 213    | 0.005 |
| J03A | 2006 | 244 | 12 | 10      | 25.655   | P          | 0.200   | 0.546  |       |
| J05A | 2006 | 244 | 12 | 10      | 35.210   | P          | 0.200   | 0.532  |       |
| K04A | 2006 | 244 | 12 | 10      | 35.866   | P          | 0.200   | 0.269  |       |
| YBH  | 2006 | 244 | 12 | 10      | 35.995   | P          | 0.200   | 0.789  |       |
| M02C | 2006 | 244 | 12 | 10      | 37.115   | P          | 0.200   | 0.827  |       |
| L04A | 2006 | 244 | 12 | 10      | 37.323   | P          | 0.200   | 0.235  |       |
| N02C | 2006 | 244 | 12 | 10      | 37.451   | P          | 0.200   | 0.370  |       |
| M04C | 2006 | 244 | 12 | 10      | 39.852   | P          | 0.200   | 0.345  |       |
| K05A | 2006 | 244 | 12 | 10      | 40.041   | P          | 0.200   | 0.637  |       |
| M03C | 2006 | 244 | 12 | 10      | 41.020   | P          | 0.200   | 0.236  |       |
| WDC  | 2006 | 244 | 12 | 10      | 42.668   | P          | 0.200   | 0.351  |       |
| L05A | 2006 | 244 | 12 | 10      | 44.048   | P          | 0.200   | 0.719  |       |
| O02C | 2006 | 244 | 12 | 10      | 44.070   | P          | 0.200   | 0.626  |       |
| P01C | 2006 | 244 | 12 | 10      | 44.708   | P          | 0.200   | 0.170  |       |
| M05C | 2006 | 244 | 12 | 10      | 45.611   | P          | 0.200   | 0.228  |       |
| HATC | 2006 | 244 | 12 | 10      | 46.976   | P          | 0.200   | 0.270  |       |
| GASB | 2006 | 244 | 12 | 10      | 47.552   | P          | 0.200   | 0.699  |       |
| O03C | 2006 | 244 | 12 | 10      | 47.988   | P          | 0.200   | -0.238 |       |

|      |      |     |    |    |        |   |       |        |
|------|------|-----|----|----|--------|---|-------|--------|
| HOPS | 2006 | 244 | 12 | 10 | 48.697 | P | 0.200 | -0.017 |
| M06C | 2006 | 244 | 12 | 10 | 50.074 | P | 0.200 | 0.368  |
| SNG5 | 2006 | 244 | 12 | 10 | 51.925 | P | 0.200 | -0.482 |
| O04C | 2006 | 244 | 12 | 10 | 51.643 | P | 0.200 | 0.194  |
| L07A | 2006 | 244 | 12 | 10 | 51.659 | P | 0.200 | 0.425  |
| ELFS | 2006 | 244 | 12 | 10 | 52.062 | P | 0.200 | 0.496  |
| ORV  | 2006 | 244 | 12 | 10 | 52.692 | P | 0.200 | -0.756 |
| SUTB | 2006 | 244 | 12 | 10 | 52.999 | P | 0.200 | -0.843 |
| MNRC | 2006 | 244 | 12 | 10 | 53.143 | P | 0.200 | 0.517  |
| SNF6 | 2006 | 244 | 12 | 10 | 54.496 | P | 0.200 | -0.466 |
| MCCM | 2006 | 244 | 12 | 10 | 54.017 | P | 0.200 | -0.470 |
| SNF9 | 2006 | 244 | 12 | 10 | 55.121 | P | 0.200 | -0.544 |
| O05C | 2006 | 244 | 12 | 10 | 54.401 | P | 0.200 | 0.212  |
| SNE4 | 2006 | 244 | 12 | 10 | 55.529 | P | 0.200 | -0.415 |
| SNE5 | 2006 | 244 | 12 | 10 | 55.873 | P | 0.200 | -0.362 |
| SNE7 | 2006 | 244 | 12 | 10 | 56.122 | P | 0.200 | -0.078 |
| CVS  | 2006 | 244 | 12 | 10 | 55.213 | P | 0.200 | -0.330 |
| M07A | 2006 | 244 | 12 | 10 | 55.596 | P | 0.200 | 0.226  |
| N06A | 2006 | 244 | 12 | 10 | 55.646 | P | 0.200 | 0.177  |
| SNE6 | 2006 | 244 | 12 | 10 | 56.790 | P | 0.200 | -0.574 |
| FARB | 2006 | 244 | 12 | 10 | 56.098 | P | 0.200 | -0.394 |
| SNE9 | 2006 | 244 | 12 | 10 | 57.255 | P | 0.200 | -0.453 |
| Q03C | 2006 | 244 | 12 | 10 | 57.024 | P | 0.200 | 0.955  |
| SND5 | 2006 | 244 | 12 | 10 | 58.220 | P | 0.200 | -0.246 |
| BEK  | 2006 | 244 | 12 | 10 | 57.472 | P | 0.200 | -0.266 |
| SND4 | 2006 | 244 | 12 | 10 | 57.710 | P | 0.200 | -0.370 |
| Q04C | 2006 | 244 | 12 | 10 | 57.802 | P | 0.200 | -0.275 |
| SND8 | 2006 | 244 | 12 | 10 | 59.365 | P | 0.200 | -0.234 |
| O06A | 2006 | 244 | 12 | 10 | 58.802 | P | 0.200 | 0.115  |
| BRK  | 2006 | 244 | 12 | 10 | 58.867 | P | 0.200 | -0.435 |
| SNC4 | 2006 | 244 | 12 | 10 | 59.950 | P | 0.200 | -0.363 |
| SNC5 | 2006 | 244 | 12 | 10 | 59.966 | P | 0.200 | -0.300 |
| BKS  | 2006 | 244 | 12 | 10 | 59.129 | P | 0.200 | -0.245 |
| SNC3 | 2006 | 244 | 12 | 11 | 0.196  | P | 0.200 | 0.400  |
| P05C | 2006 | 244 | 12 | 10 | 59.288 | P | 0.200 | -0.339 |
| SNC7 | 2006 | 244 | 12 | 11 | 0.431  | P | 0.200 | -0.279 |
| BRIB | 2006 | 244 | 12 | 10 | 59.448 | P | 0.200 | -0.063 |
| N07B | 2006 | 244 | 12 | 10 | 59.716 | P | 0.200 | 0.030  |
| BDM  | 2006 | 244 | 12 | 11 | 0.727  | P | 0.200 | -0.050 |
| SNB5 | 2006 | 244 | 12 | 11 | 2.172  | P | 0.200 | -0.350 |
| P06A | 2006 | 244 | 12 | 11 | 1.207  | P | 0.200 | 0.201  |
| JRSC | 2006 | 244 | 12 | 11 | 1.599  | P | 0.200 | -0.566 |
| LAVA | 2006 | 244 | 12 | 11 | 1.645  | P | 0.200 | -0.278 |
| SNB7 | 2006 | 244 | 12 | 11 | 3.700  | P | 0.200 | 0.271  |
| SNB6 | 2006 | 244 | 12 | 11 | 3.847  | P | 0.200 | 0.037  |
| R04C | 2006 | 244 | 12 | 11 | 3.174  | P | 0.200 | -0.469 |
| SNA4 | 2006 | 244 | 12 | 11 | 4.228  | P | 0.200 | -0.209 |
| WENL | 2006 | 244 | 12 | 11 | 3.317  | P | 0.200 | 0.017  |
| SNA3 | 2006 | 244 | 12 | 11 | 4.341  | P | 0.200 | 0.180  |
| BNLO | 2006 | 244 | 12 | 11 | 3.544  | P | 0.200 | -0.595 |
| SNA5 | 2006 | 244 | 12 | 11 | 4.726  | P | 0.200 | -0.131 |
| O07A | 2006 | 244 | 12 | 11 | 3.737  | P | 0.200 | 0.194  |
| N08A | 2006 | 244 | 12 | 11 | 3.957  | P | 0.200 | 0.027  |
| WCN  | 2006 | 244 | 12 | 11 | 4.094  | P | 0.200 | 0.132  |
| SNA7 | 2006 | 244 | 12 | 11 | 5.156  | P | 0.200 | 0.215  |
| SNA8 | 2006 | 244 | 12 | 11 | 6.081  | P | 0.200 | 0.149  |
| MHC  | 2006 | 244 | 12 | 11 | 5.440  | P | 0.200 | -0.221 |
| SN97 | 2006 | 244 | 12 | 11 | 6.686  | P | 0.200 | 0.176  |
| R05C | 2006 | 244 | 12 | 11 | 5.836  | P | 0.200 | 0.027  |
| S04C | 2006 | 244 | 12 | 11 | 6.049  | P | 0.200 | -0.092 |
| SN93 | 2006 | 244 | 12 | 11 | 6.342  | P | 0.200 | 0.386  |
| O08A | 2006 | 244 | 12 | 11 | 6.730  | P | 0.200 | 0.177  |
| P07A | 2006 | 244 | 12 | 11 | 7.179  | P | 0.200 | 0.234  |

|      |      |     |    |    |        |   |       |        |
|------|------|-----|----|----|--------|---|-------|--------|
| SN96 | 2006 | 244 | 12 | 11 | 7.406  | P | 0.200 | 0.153  |
| CMB  | 2006 | 244 | 12 | 11 | 7.867  | P | 0.200 | 0.064  |
| PACP | 2006 | 244 | 12 | 11 | 9.180  | P | 0.200 | -0.155 |
| SAO  | 2006 | 244 | 12 | 11 | 9.531  | P | 0.200 | -0.375 |
| R06C | 2006 | 244 | 12 | 11 | 10.251 | P | 0.200 | 0.325  |
| P08A | 2006 | 244 | 12 | 11 | 10.546 | P | 0.200 | 0.422  |
| Q07A | 2006 | 244 | 12 | 11 | 10.819 | P | 0.200 | 0.182  |
| HAST | 2006 | 244 | 12 | 11 | 11.401 | P | 0.200 | -0.227 |
| S06C | 2006 | 244 | 12 | 11 | 11.490 | P | 0.200 | -0.038 |
| S05C | 2006 | 244 | 12 | 11 | 11.555 | P | 0.200 | -0.487 |
| O09A | 2006 | 244 | 12 | 11 | 12.210 | P | 0.200 | 0.212  |
| SN55 | 2006 | 244 | 12 | 11 | 14.330 | P | 0.200 | 0.029  |
| T05C | 2006 | 244 | 12 | 11 | 13.491 | P | 0.200 | 0.527  |
| R07C | 2006 | 244 | 12 | 11 | 14.752 | P | 0.200 | 0.301  |
| SN43 | 2006 | 244 | 12 | 11 | 16.321 | P | 0.200 | 0.110  |
| Q08A | 2006 | 244 | 12 | 11 | 15.551 | P | 0.200 | -0.041 |
| V03C | 2006 | 244 | 12 | 11 | 15.556 | P | 0.200 | 0.236  |
| P09A | 2006 | 244 | 12 | 11 | 15.866 | P | 0.200 | 0.123  |
| U04C | 2006 | 244 | 12 | 11 | 16.104 | P | 0.200 | 0.457  |
| T06C | 2006 | 244 | 12 | 11 | 17.022 | P | 0.200 | -0.105 |
| R08A | 2006 | 244 | 12 | 11 | 17.667 | P | 0.200 | 0.121  |
| SN24 | 2006 | 244 | 12 | 11 | 19.785 | P | 0.200 | 0.303  |
| P10A | 2006 | 244 | 12 | 11 | 18.873 | P | 0.200 | 0.076  |
| MLAC | 2006 | 244 | 12 | 11 | 19.090 | P | 0.200 | 0.926  |
| PKD  | 2006 | 244 | 12 | 11 | 19.178 | P | 0.200 | -0.099 |
| U05C | 2006 | 244 | 12 | 11 | 19.734 | P | 0.200 | 0.806  |
| RAMR | 2006 | 244 | 12 | 11 | 19.766 | P | 0.200 | 0.333  |
| Q09A | 2006 | 244 | 12 | 11 | 19.801 | P | 0.200 | 0.329  |
| HELL | 2006 | 244 | 12 | 11 | 22.229 | P | 0.200 | -0.347 |
| PHL  | 2006 | 244 | 12 | 11 | 22.575 | P | 0.200 | 0.194  |
| S08C | 2006 | 244 | 12 | 11 | 22.748 | P | 0.200 | 0.418  |
| R09A | 2006 | 244 | 12 | 11 | 23.142 | P | 0.200 | -0.285 |
| RCT  | 2006 | 244 | 12 | 11 | 23.237 | P | 0.200 | -0.201 |
| TPH  | 2006 | 244 | 12 | 11 | 23.425 | P | 0.200 | -0.222 |
| V05C | 2006 | 244 | 12 | 11 | 23.587 | P | 0.200 | 0.797  |
| TIN  | 2006 | 244 | 12 | 11 | 24.873 | P | 0.200 | 0.491  |
| S09A | 2006 | 244 | 12 | 11 | 25.407 | P | 0.200 | -0.202 |
| SMM  | 2006 | 244 | 12 | 11 | 26.176 | P | 0.200 | 0.415  |
| VES  | 2006 | 244 | 12 | 11 | 26.607 | P | 0.200 | -0.407 |
| R10A | 2006 | 244 | 12 | 11 | 26.692 | P | 0.200 | -0.285 |
| Q11A | 2006 | 244 | 12 | 11 | 26.899 | P | 0.200 | -0.206 |
| CWC  | 2006 | 244 | 12 | 11 | 28.879 | P | 0.200 | 0.162  |
| GRA  | 2006 | 244 | 12 | 11 | 29.427 | P | 0.200 | 0.596  |
| MPP  | 2006 | 244 | 12 | 11 | 29.667 | P | 0.200 | 0.340  |
| ISA  | 2006 | 244 | 12 | 11 | 30.651 | P | 0.200 | -0.460 |
| ARV  | 2006 | 244 | 12 | 11 | 31.784 | P | 0.200 | -0.722 |
| SBC  | 2006 | 244 | 12 | 11 | 32.489 | P | 0.200 | 0.201  |
| MPM  | 2006 | 244 | 12 | 11 | 33.809 | P | 0.200 | -0.012 |
| FUR  | 2006 | 244 | 12 | 11 | 34.456 | P | 0.200 | 0.217  |
| SCZ2 | 2006 | 244 | 12 | 11 | 35.065 | P | 0.200 | -0.293 |
| SLA  | 2006 | 244 | 12 | 11 | 35.740 | P | 0.200 | -0.018 |
| LRL  | 2006 | 244 | 12 | 11 | 35.800 | P | 0.200 | -0.419 |
| OSI  | 2006 | 244 | 12 | 11 | 36.206 | P | 0.200 | 0.030  |
| LGU  | 2006 | 244 | 12 | 11 | 37.033 | P | 0.200 | -0.459 |
| U10A | 2006 | 244 | 12 | 11 | 37.497 | P | 0.200 | 0.254  |
| EDW2 | 2006 | 244 | 12 | 11 | 37.712 | P | 0.200 | -0.341 |
| TOV  | 2006 | 244 | 12 | 11 | 37.981 | P | 0.200 | -0.358 |
| DJJ  | 2006 | 244 | 12 | 11 | 39.845 | P | 0.200 | -0.540 |
| DEC  | 2006 | 244 | 12 | 11 | 39.849 | P | 0.200 | -0.325 |
| VCS  | 2006 | 244 | 12 | 11 | 40.022 | P | 0.200 | 0.122  |
| SHO  | 2006 | 244 | 12 | 11 | 40.365 | P | 0.200 | -0.202 |
| PAS  | 2006 | 244 | 12 | 11 | 41.012 | P | 0.200 | -0.534 |
| CHF  | 2006 | 244 | 12 | 11 | 41.261 | P | 0.200 | -0.049 |

|      |      |     |    |    |        |   |       |        |
|------|------|-----|----|----|--------|---|-------|--------|
| GSC  | 2006 | 244 | 12 | 11 | 41.311 | P | 0.200 | -0.134 |
| MWC  | 2006 | 244 | 12 | 11 | 41.608 | P | 0.200 | -0.275 |
| U11A | 2006 | 244 | 12 | 11 | 41.656 | P | 0.200 | -0.253 |
| USC  | 2006 | 244 | 12 | 11 | 41.730 | P | 0.200 | 0.021  |
| RPV  | 2006 | 244 | 12 | 11 | 42.315 | P | 0.200 | -0.548 |
| RRX  | 2006 | 244 | 12 | 11 | 42.885 | P | 0.200 | -0.049 |
| ADO  | 2006 | 244 | 12 | 11 | 42.934 | P | 0.200 | 0.058  |
| VTV  | 2006 | 244 | 12 | 11 | 43.029 | P | 0.200 | -0.199 |
| FMP  | 2006 | 244 | 12 | 11 | 43.031 | P | 0.200 | -0.433 |
| BFS  | 2006 | 244 | 12 | 11 | 43.548 | P | 0.200 | -0.068 |
| CIA  | 2006 | 244 | 12 | 11 | 44.374 | P | 0.200 | -0.515 |
| TUQ  | 2006 | 244 | 12 | 11 | 44.816 | P | 0.200 | -0.217 |
| V11A | 2006 | 244 | 12 | 11 | 45.086 | P | 0.200 | -0.051 |
| HEC  | 2006 | 244 | 12 | 11 | 46.259 | P | 0.200 | -0.251 |
| SVD  | 2006 | 244 | 12 | 11 | 46.935 | P | 0.200 | -0.152 |
| BBR  | 2006 | 244 | 12 | 11 | 47.017 | P | 0.200 | -0.206 |
| SDD  | 2006 | 244 | 12 | 11 | 47.325 | P | 0.200 | -0.174 |

|      |     |    |    |         |          |           |         |     |       |
|------|-----|----|----|---------|----------|-----------|---------|-----|-------|
| 2006 | 236 | 21 | 50 | 36.4632 | 51.14800 | 157.52200 | 43.0000 | 210 | 0.000 |
|------|-----|----|----|---------|----------|-----------|---------|-----|-------|

|      |      |     |    |    |        |   |       |        |
|------|------|-----|----|----|--------|---|-------|--------|
| I03A | 2006 | 236 | 21 | 59 | 37.423 | P | 0.200 | 0.291  |
| J02A | 2006 | 236 | 21 | 59 | 39.104 | P | 0.200 | 0.370  |
| DBO  | 2006 | 236 | 21 | 59 | 41.807 | P | 0.200 | 0.420  |
| J03A | 2006 | 236 | 21 | 59 | 41.977 | P | 0.200 | 0.705  |
| M01C | 2006 | 236 | 21 | 59 | 43.903 | P | 0.200 | 0.636  |
| L02A | 2006 | 236 | 21 | 59 | 44.650 | P | 0.200 | 0.462  |
| JCC  | 2006 | 236 | 21 | 59 | 49.227 | P | 0.200 | 0.694  |
| J05A | 2006 | 236 | 21 | 59 | 49.718 | P | 0.200 | 0.618  |
| K04A | 2006 | 236 | 21 | 59 | 50.463 | P | 0.200 | 0.357  |
| YBH  | 2006 | 236 | 21 | 59 | 50.936 | P | 0.200 | 0.926  |
| L04A | 2006 | 236 | 21 | 59 | 51.733 | P | 0.200 | 0.272  |
| M02C | 2006 | 236 | 21 | 59 | 51.867 | P | 0.200 | 0.904  |
| N02C | 2006 | 236 | 21 | 59 | 52.264 | P | 0.200 | 0.583  |
| O01C | 2006 | 236 | 21 | 59 | 53.523 | P | 0.200 | 0.909  |
| K05A | 2006 | 236 | 21 | 59 | 53.794 | P | 0.200 | 0.609  |
| M04C | 2006 | 236 | 21 | 59 | 53.885 | P | 0.200 | 0.291  |
| M03C | 2006 | 236 | 21 | 59 | 55.024 | P | 0.200 | 0.273  |
| WDC  | 2006 | 236 | 21 | 59 | 56.412 | P | 0.200 | 0.369  |
| L05A | 2006 | 236 | 21 | 59 | 57.112 | P | 0.200 | 0.465  |
| O02C | 2006 | 236 | 21 | 59 | 57.562 | P | 0.200 | 0.491  |
| P01C | 2006 | 236 | 21 | 59 | 58.162 | P | 0.200 | 0.271  |
| M05C | 2006 | 236 | 21 | 59 | 58.632 | P | 0.200 | 0.121  |
| HATC | 2006 | 236 | 21 | 59 | 59.862 | P | 0.200 | 0.185  |
| GASB | 2006 | 236 | 22 | 0  | 0.536  | P | 0.200 | 0.632  |
| O03C | 2006 | 236 | 22 | 0  | 0.868  | P | 0.200 | -0.132 |
| HOPS | 2006 | 236 | 22 | 0  | 1.250  | P | 0.200 | -0.135 |
| M06C | 2006 | 236 | 22 | 0  | 2.346  | P | 0.200 | 0.291  |
| SNG5 | 2006 | 236 | 22 | 0  | 4.011  | P | 0.200 | -0.452 |
| SNG7 | 2006 | 236 | 22 | 0  | 4.304  | P | 0.200 | -0.015 |
| L07A | 2006 | 236 | 22 | 0  | 3.524  | P | 0.200 | 0.491  |
| O04C | 2006 | 236 | 22 | 0  | 3.872  | P | 0.200 | 0.221  |
| ELFS | 2006 | 236 | 22 | 0  | 4.112  | P | 0.200 | 0.432  |
| ORV  | 2006 | 236 | 22 | 0  | 4.751  | P | 0.200 | -0.607 |
| SUTB | 2006 | 236 | 22 | 0  | 4.889  | P | 0.200 | -0.773 |
| MNRC | 2006 | 236 | 22 | 0  | 5.174  | P | 0.200 | 0.499  |
| SNF6 | 2006 | 236 | 22 | 0  | 6.364  | P | 0.200 | -0.232 |
| MCCM | 2006 | 236 | 22 | 0  | 5.553  | P | 0.200 | -0.493 |
| SNF8 | 2006 | 236 | 22 | 0  | 7.037  | P | 0.200 | -0.027 |
| O05C | 2006 | 236 | 22 | 0  | 6.066  | P | 0.200 | 0.158  |
| SNE4 | 2006 | 236 | 22 | 0  | 7.202  | P | 0.200 | -0.160 |
| SNE5 | 2006 | 236 | 22 | 0  | 7.326  | P | 0.200 | -0.377 |
| SNE7 | 2006 | 236 | 22 | 0  | 7.563  | P | 0.200 | -0.027 |
| CVS  | 2006 | 236 | 22 | 0  | 6.792  | P | 0.200 | -0.239 |
| N06A | 2006 | 236 | 22 | 0  | 7.006  | P | 0.200 | 0.153  |

|      |      |     |    |   |        |   |       |        |
|------|------|-----|----|---|--------|---|-------|--------|
| M07A | 2006 | 236 | 22 | 0 | 7.025  | P | 0.200 | 0.484  |
| FARB | 2006 | 236 | 22 | 0 | 7.118  | P | 0.200 | -0.531 |
| SNE6 | 2006 | 236 | 22 | 0 | 8.203  | P | 0.200 | -0.430 |
| SND5 | 2006 | 236 | 22 | 0 | 9.092  | P | 0.200 | -0.421 |
| Q03C | 2006 | 236 | 22 | 0 | 8.352  | P | 0.200 | 0.856  |
| BEK  | 2006 | 236 | 22 | 0 | 8.695  | P | 0.200 | -0.223 |
| SND4 | 2006 | 236 | 22 | 0 | 8.987  | P | 0.200 | -0.222 |
| Q04C | 2006 | 236 | 22 | 0 | 9.110  | P | 0.200 | -0.054 |
| SND8 | 2006 | 236 | 22 | 0 | 10.325 | P | 0.200 | -0.108 |
| O06A | 2006 | 236 | 22 | 0 | 9.687  | P | 0.200 | 0.106  |
| SNC5 | 2006 | 236 | 22 | 0 | 10.773 | P | 0.200 | -0.215 |
| BRK  | 2006 | 236 | 22 | 0 | 9.773  | P | 0.200 | -0.336 |
| SNC4 | 2006 | 236 | 22 | 0 | 10.852 | P | 0.200 | -0.194 |
| SNC3 | 2006 | 236 | 22 | 0 | 10.913 | P | 0.200 | 0.345  |
| BKS  | 2006 | 236 | 22 | 0 | 10.018 | P | 0.200 | -0.123 |
| BRIB | 2006 | 236 | 22 | 0 | 10.219 | P | 0.200 | -0.031 |
| SNC7 | 2006 | 236 | 22 | 0 | 11.335 | P | 0.200 | -0.093 |
| P05C | 2006 | 236 | 22 | 0 | 10.377 | P | 0.200 | -0.115 |
| N07B | 2006 | 236 | 22 | 0 | 10.559 | P | 0.200 | 0.312  |
| SNC8 | 2006 | 236 | 22 | 0 | 12.178 | P | 0.200 | 0.001  |
| P06A | 2006 | 236 | 22 | 0 | 11.693 | P | 0.200 | 0.159  |
| SNB5 | 2006 | 236 | 22 | 0 | 12.709 | P | 0.200 | -0.184 |
| BDM  | 2006 | 236 | 22 | 0 | 11.810 | P | 0.200 | 0.448  |
| JRSC | 2006 | 236 | 22 | 0 | 11.857 | P | 0.200 | -0.576 |
| LAVA | 2006 | 236 | 22 | 0 | 12.173 | P | 0.200 | -0.233 |
| SNB7 | 2006 | 236 | 22 | 0 | 13.649 | P | 0.200 | -0.032 |
| SNB6 | 2006 | 236 | 22 | 0 | 13.986 | P | 0.200 | -0.005 |
| BNLO | 2006 | 236 | 22 | 0 | 13.386 | P | 0.200 | -0.647 |
| WENL | 2006 | 236 | 22 | 0 | 13.398 | P | 0.200 | -0.034 |
| SNA3 | 2006 | 236 | 22 | 0 | 14.420 | P | 0.200 | 0.196  |
| SNA4 | 2006 | 236 | 22 | 0 | 14.478 | P | 0.200 | 0.009  |
| R04C | 2006 | 236 | 22 | 0 | 13.567 | P | 0.200 | -0.186 |
| SNA5 | 2006 | 236 | 22 | 0 | 14.733 | P | 0.200 | -0.160 |
| N08A | 2006 | 236 | 22 | 0 | 14.115 | P | 0.200 | 0.431  |
| SNA7 | 2006 | 236 | 22 | 0 | 15.181 | P | 0.200 | 0.308  |
| WCN  | 2006 | 236 | 22 | 0 | 14.262 | P | 0.200 | 0.206  |
| SNA8 | 2006 | 236 | 22 | 0 | 15.921 | P | 0.200 | 0.206  |
| MHC  | 2006 | 236 | 22 | 0 | 15.166 | P | 0.200 | -0.255 |
| SN97 | 2006 | 236 | 22 | 0 | 16.293 | P | 0.200 | 0.098  |
| R05C | 2006 | 236 | 22 | 0 | 15.631 | P | 0.200 | 0.004  |
| S04C | 2006 | 236 | 22 | 0 | 15.758 | P | 0.200 | -0.089 |
| SN93 | 2006 | 236 | 22 | 0 | 16.097 | P | 0.200 | 0.422  |
| O08A | 2006 | 236 | 22 | 0 | 16.444 | P | 0.200 | 0.520  |
| P07A | 2006 | 236 | 22 | 0 | 16.698 | P | 0.200 | 0.218  |
| SN96 | 2006 | 236 | 22 | 0 | 16.999 | P | 0.200 | 0.148  |
| CMB  | 2006 | 236 | 22 | 0 | 17.365 | P | 0.200 | 0.142  |
| PACP | 2006 | 236 | 22 | 0 | 18.348 | P | 0.200 | -0.046 |
| SAO  | 2006 | 236 | 22 | 0 | 18.591 | P | 0.200 | -0.217 |
| BMN  | 2006 | 236 | 22 | 0 | 19.300 | P | 0.200 | 0.240  |
| R06C | 2006 | 236 | 22 | 0 | 19.364 | P | 0.200 | 0.344  |
| P08A | 2006 | 236 | 22 | 0 | 19.613 | P | 0.200 | 0.636  |
| Q07A | 2006 | 236 | 22 | 0 | 19.730 | P | 0.200 | 0.228  |
| HAST | 2006 | 236 | 22 | 0 | 19.847 | P | 0.200 | -0.344 |
| S06C | 2006 | 236 | 22 | 0 | 20.218 | P | 0.200 | -0.129 |
| S05C | 2006 | 236 | 22 | 0 | 20.226 | P | 0.200 | -0.481 |
| SN64 | 2006 | 236 | 22 | 0 | 21.479 | P | 0.200 | 0.033  |
| O09A | 2006 | 236 | 22 | 0 | 20.960 | P | 0.200 | 0.673  |
| SN65 | 2006 | 236 | 22 | 0 | 21.248 | P | 0.200 | -0.166 |
| T05C | 2006 | 236 | 22 | 0 | 21.744 | P | 0.200 | 0.316  |
| SN55 | 2006 | 236 | 22 | 0 | 22.954 | P | 0.200 | 0.297  |
| SN43 | 2006 | 236 | 22 | 0 | 24.048 | P | 0.200 | -0.197 |
| R07C | 2006 | 236 | 22 | 0 | 23.081 | P | 0.200 | 0.277  |
| V03C | 2006 | 236 | 22 | 0 | 23.173 | P | 0.200 | 0.014  |

|      |      |     |    |   |        |   |       |        |
|------|------|-----|----|---|--------|---|-------|--------|
| Q08A | 2006 | 236 | 22 | 0 | 23.763 | P | 0.200 | 0.159  |
| U04C | 2006 | 236 | 22 | 0 | 23.781 | P | 0.200 | 0.232  |
| SN45 | 2006 | 236 | 22 | 0 | 24.914 | P | 0.200 | 0.364  |
| P09A | 2006 | 236 | 22 | 0 | 23.935 | P | 0.200 | 0.404  |
| T06C | 2006 | 236 | 22 | 0 | 24.606 | P | 0.200 | -0.300 |
| R08A | 2006 | 236 | 22 | 0 | 25.530 | P | 0.200 | 0.344  |
| SN24 | 2006 | 236 | 22 | 0 | 26.929 | P | 0.200 | 0.028  |
| P10A | 2006 | 236 | 22 | 0 | 26.264 | P | 0.200 | 0.288  |
| PKD  | 2006 | 236 | 22 | 0 | 26.276 | P | 0.200 | -0.248 |
| MLAC | 2006 | 236 | 22 | 0 | 26.322 | P | 0.200 | 0.487  |
| RAMR | 2006 | 236 | 22 | 0 | 26.540 | P | 0.200 | 0.021  |
| U05C | 2006 | 236 | 22 | 0 | 26.657 | P | 0.200 | 0.404  |
| Q09A | 2006 | 236 | 22 | 0 | 27.014 | P | 0.200 | 0.332  |
| HELL | 2006 | 236 | 22 | 0 | 28.778 | P | 0.200 | -0.621 |
| PHL  | 2006 | 236 | 22 | 0 | 28.826 | P | 0.200 | -0.117 |
| RCT  | 2006 | 236 | 22 | 0 | 29.408 | P | 0.200 | -0.597 |
| V05C | 2006 | 236 | 22 | 0 | 29.591 | P | 0.200 | 0.191  |
| S08C | 2006 | 236 | 22 | 0 | 29.651 | P | 0.200 | 0.401  |
| R09A | 2006 | 236 | 22 | 0 | 29.922 | P | 0.200 | -0.083 |
| TPH  | 2006 | 236 | 22 | 0 | 30.048 | P | 0.200 | -0.198 |
| TIN  | 2006 | 236 | 22 | 0 | 31.127 | P | 0.200 | 0.187  |
| S09A | 2006 | 236 | 22 | 0 | 31.803 | P | 0.200 | -0.058 |
| VES  | 2006 | 236 | 22 | 0 | 31.921 | P | 0.200 | -1.046 |
| Q11A | 2006 | 236 | 22 | 0 | 32.795 | P | 0.200 | -0.043 |
| R10A | 2006 | 236 | 22 | 0 | 32.815 | P | 0.200 | -0.091 |
| CWC  | 2006 | 236 | 22 | 0 | 34.455 | P | 0.200 | -0.042 |
| MPP  | 2006 | 236 | 22 | 0 | 34.676 | P | 0.200 | -0.045 |
| GRA  | 2006 | 236 | 22 | 0 | 34.891 | P | 0.200 | 0.400  |
| BAK  | 2006 | 236 | 22 | 0 | 35.406 | P | 0.200 | 0.192  |
| ISA  | 2006 | 236 | 22 | 0 | 35.606 | P | 0.200 | -0.721 |
| ARV  | 2006 | 236 | 22 | 0 | 36.861 | P | 0.200 | -0.527 |
| SBC  | 2006 | 236 | 22 | 0 | 36.869 | P | 0.200 | -0.219 |
| MPM  | 2006 | 236 | 22 | 0 | 38.555 | P | 0.200 | -0.126 |
| SCZ2 | 2006 | 236 | 22 | 0 | 38.672 | P | 0.200 | -0.804 |
| FUR  | 2006 | 236 | 22 | 0 | 38.870 | P | 0.200 | -0.019 |
| SLA  | 2006 | 236 | 22 | 0 | 39.975 | P | 0.200 | -0.263 |
| LRL  | 2006 | 236 | 22 | 0 | 40.078 | P | 0.200 | -0.490 |
| OSI  | 2006 | 236 | 22 | 0 | 40.135 | P | 0.200 | -0.266 |
| LGU  | 2006 | 236 | 22 | 0 | 40.507 | P | 0.200 | -0.885 |
| TOV  | 2006 | 236 | 22 | 0 | 41.326 | P | 0.200 | -0.767 |
| U10A | 2006 | 236 | 22 | 0 | 41.672 | P | 0.200 | 0.325  |
| DEC  | 2006 | 236 | 22 | 0 | 42.933 | P | 0.200 | -0.718 |
| SNCC | 2006 | 236 | 22 | 0 | 43.043 | P | 0.200 | -0.574 |
| SHO  | 2006 | 236 | 22 | 0 | 43.904 | P | 0.200 | -0.207 |
| PAS  | 2006 | 236 | 22 | 0 | 43.990 | P | 0.200 | -0.780 |
| CHF  | 2006 | 236 | 22 | 0 | 44.296 | P | 0.200 | -0.304 |
| MWC  | 2006 | 236 | 22 | 0 | 44.487 | P | 0.200 | -0.620 |
| USC  | 2006 | 236 | 22 | 0 | 44.490 | P | 0.200 | -0.361 |
| GSC  | 2006 | 236 | 22 | 0 | 44.582 | P | 0.200 | -0.243 |
| RPV  | 2006 | 236 | 22 | 0 | 44.977 | P | 0.200 | -0.787 |
| U11A | 2006 | 236 | 22 | 0 | 45.344 | P | 0.200 | 0.225  |
| FMP  | 2006 | 236 | 22 | 0 | 45.569 | P | 0.200 | -0.623 |
| ADO  | 2006 | 236 | 22 | 0 | 45.741 | P | 0.200 | -0.242 |
| RRX  | 2006 | 236 | 22 | 0 | 45.896 | P | 0.200 | -0.099 |
| CIA  | 2006 | 236 | 22 | 0 | 46.565 | P | 0.200 | -0.800 |
| TUQ  | 2006 | 236 | 22 | 0 | 47.495 | P | 0.200 | -0.249 |
| HEC  | 2006 | 236 | 22 | 0 | 48.645 | P | 0.200 | -0.326 |
| SVD  | 2006 | 236 | 22 | 0 | 48.792 | P | 0.200 | -0.598 |
| BBR  | 2006 | 236 | 22 | 0 | 49.009 | P | 0.200 | -0.567 |
| SDD  | 2006 | 236 | 22 | 0 | 49.221 | P | 0.200 | -0.341 |

|      |      |     |    |         |          |           |         |       |
|------|------|-----|----|---------|----------|-----------|---------|-------|
| 2006 | 229  | 15  | 20 | 36.3011 | 46.54000 | 141.90500 | 16.8000 |       |
| I03A | 2006 | 229 | 15 | 31      | 0.848    | P         | 0.200   | 1.007 |

|     |       |
|-----|-------|
| 209 | 0.006 |
|-----|-------|

|      |      |     |    |    |        |   |       |        |
|------|------|-----|----|----|--------|---|-------|--------|
| K01A | 2006 | 229 | 15 | 31 | 1.154  | P | 0.200 | 0.846  |
| J02A | 2006 | 229 | 15 | 31 | 2.268  | P | 0.200 | 0.882  |
| J03A | 2006 | 229 | 15 | 31 | 4.619  | P | 0.200 | 1.040  |
| DBO  | 2006 | 229 | 15 | 31 | 4.653  | P | 0.200 | 0.892  |
| M01C | 2006 | 229 | 15 | 31 | 6.452  | P | 0.200 | 0.871  |
| L02A | 2006 | 229 | 15 | 31 | 7.056  | P | 0.200 | 0.676  |
| JCC  | 2006 | 229 | 15 | 31 | 11.181 | P | 0.200 | 0.815  |
| J05A | 2006 | 229 | 15 | 31 | 11.202 | P | 0.200 | 0.748  |
| K04A | 2006 | 229 | 15 | 31 | 11.963 | P | 0.200 | 0.490  |
| YBH  | 2006 | 229 | 15 | 31 | 12.352 | P | 0.200 | 0.814  |
| L04A | 2006 | 229 | 15 | 31 | 13.247 | P | 0.200 | 0.514  |
| M02C | 2006 | 229 | 15 | 31 | 13.416 | P | 0.200 | 0.988  |
| N02C | 2006 | 229 | 15 | 31 | 13.650 | P | 0.200 | 0.511  |
| O01C | 2006 | 229 | 15 | 31 | 14.862 | P | 0.200 | 0.841  |
| K05A | 2006 | 229 | 15 | 31 | 14.938 | P | 0.200 | 0.799  |
| M04C | 2006 | 229 | 15 | 31 | 15.164 | P | 0.200 | 0.468  |
| M03C | 2006 | 229 | 15 | 31 | 16.142 | P | 0.200 | 0.346  |
| WDC  | 2006 | 229 | 15 | 31 | 17.347 | P | 0.200 | 0.363  |
| L05A | 2006 | 229 | 15 | 31 | 17.863 | P | 0.200 | 0.536  |
| O02C | 2006 | 229 | 15 | 31 | 18.543 | P | 0.200 | 0.554  |
| P01C | 2006 | 229 | 15 | 31 | 18.892 | P | 0.200 | 0.151  |
| M05C | 2006 | 229 | 15 | 31 | 19.321 | P | 0.200 | 0.239  |
| HATC | 2006 | 229 | 15 | 31 | 20.538 | P | 0.200 | 0.362  |
| O03C | 2006 | 229 | 15 | 31 | 21.079 | P | 0.200 | -0.361 |
| GASB | 2006 | 229 | 15 | 31 | 21.239 | P | 0.200 | 0.702  |
| HOPS | 2006 | 229 | 15 | 31 | 21.718 | P | 0.200 | -0.179 |
| M06C | 2006 | 229 | 15 | 31 | 22.568 | P | 0.200 | 0.369  |
| SNG5 | 2006 | 229 | 15 | 31 | 23.884 | P | 0.200 | -0.627 |
| L07A | 2006 | 229 | 15 | 31 | 23.413 | P | 0.200 | 0.509  |
| SNG7 | 2006 | 229 | 15 | 31 | 24.521 | P | 0.200 | 0.135  |
| O04C | 2006 | 229 | 15 | 31 | 24.037 | P | 0.200 | 0.293  |
| ELFS | 2006 | 229 | 15 | 31 | 24.219 | P | 0.200 | 0.509  |
| ORV  | 2006 | 229 | 15 | 31 | 24.585 | P | 0.200 | -0.756 |
| SUTB | 2006 | 229 | 15 | 31 | 24.918 | P | 0.200 | -0.712 |
| SNF6 | 2006 | 229 | 15 | 31 | 25.946 | P | 0.200 | -0.456 |
| SNF9 | 2006 | 229 | 15 | 31 | 26.095 | P | 0.200 | -0.693 |
| MNRC | 2006 | 229 | 15 | 31 | 25.269 | P | 0.200 | 0.441  |
| MCCM | 2006 | 229 | 15 | 31 | 25.504 | P | 0.200 | -0.514 |
| SNF8 | 2006 | 229 | 15 | 31 | 26.633 | P | 0.200 | -0.160 |
| O05C | 2006 | 229 | 15 | 31 | 25.734 | P | 0.200 | -0.012 |
| SNE4 | 2006 | 229 | 15 | 31 | 26.960 | P | 0.200 | -0.129 |
| SNE7 | 2006 | 229 | 15 | 31 | 27.104 | P | 0.200 | -0.145 |
| SNE5 | 2006 | 229 | 15 | 31 | 27.108 | P | 0.200 | -0.326 |
| M07A | 2006 | 229 | 15 | 31 | 26.475 | P | 0.200 | 0.423  |
| SNE6 | 2006 | 229 | 15 | 31 | 27.515 | P | 0.200 | -0.726 |
| CVS  | 2006 | 229 | 15 | 31 | 26.533 | P | 0.200 | -0.392 |
| N06A | 2006 | 229 | 15 | 31 | 26.547 | P | 0.200 | 0.075  |
| SNE9 | 2006 | 229 | 15 | 31 | 27.723 | P | 0.200 | -0.642 |
| FARB | 2006 | 229 | 15 | 31 | 27.051 | P | 0.200 | -0.416 |
| SND5 | 2006 | 229 | 15 | 31 | 28.616 | P | 0.200 | -0.398 |
| BEK  | 2006 | 229 | 15 | 31 | 28.080 | P | 0.200 | -0.374 |
| Q03C | 2006 | 229 | 15 | 31 | 28.261 | P | 0.200 | 0.965  |
| SND8 | 2006 | 229 | 15 | 31 | 29.593 | P | 0.200 | -0.180 |
| Q04C | 2006 | 229 | 15 | 31 | 28.695 | P | 0.200 | -0.033 |
| O06A | 2006 | 229 | 15 | 31 | 29.024 | P | 0.200 | 0.093  |
| SNC4 | 2006 | 229 | 15 | 31 | 30.024 | P | 0.200 | -0.363 |
| SNC5 | 2006 | 229 | 15 | 31 | 30.028 | P | 0.200 | -0.278 |
| BRK  | 2006 | 229 | 15 | 31 | 29.330 | P | 0.200 | -0.321 |
| SNC3 | 2006 | 229 | 15 | 31 | 30.392 | P | 0.200 | 0.433  |
| BKS  | 2006 | 229 | 15 | 31 | 29.563 | P | 0.200 | -0.097 |
| P05C | 2006 | 229 | 15 | 31 | 29.585 | P | 0.200 | -0.288 |
| N07B | 2006 | 229 | 15 | 31 | 29.654 | P | 0.200 | 0.243  |
| BRIB | 2006 | 229 | 15 | 31 | 29.694 | P | 0.200 | -0.046 |



|      |      |     |    |    |        |   |       |        |
|------|------|-----|----|----|--------|---|-------|--------|
| SNC8 | 2006 | 229 | 15 | 31 | 31.419 | P | 0.200 | 0.067  |
| SNB5 | 2006 | 229 | 15 | 31 | 31.716 | P | 0.200 | -0.301 |
| P06A | 2006 | 229 | 15 | 31 | 30.953 | P | 0.200 | 0.251  |
| JRSC | 2006 | 229 | 15 | 31 | 31.212 | P | 0.200 | -0.509 |
| LAVA | 2006 | 229 | 15 | 31 | 31.293 | P | 0.200 | -0.312 |
| SNB7 | 2006 | 229 | 15 | 31 | 32.656 | P | 0.200 | -0.054 |
| SNB6 | 2006 | 229 | 15 | 31 | 32.922 | P | 0.200 | -0.080 |
| SNA4 | 2006 | 229 | 15 | 31 | 33.122 | P | 0.200 | -0.305 |
| SNA3 | 2006 | 229 | 15 | 31 | 33.296 | P | 0.200 | 0.086  |
| R04C | 2006 | 229 | 15 | 31 | 32.498 | P | 0.200 | -0.288 |
| BNLO | 2006 | 229 | 15 | 31 | 32.517 | P | 0.200 | -0.615 |
| WENL | 2006 | 229 | 15 | 31 | 32.526 | P | 0.200 | -0.063 |
| SNA5 | 2006 | 229 | 15 | 31 | 33.536 | P | 0.200 | -0.296 |
| N08A | 2006 | 229 | 15 | 31 | 32.561 | P | 0.200 | 0.159  |
| O07A | 2006 | 229 | 15 | 31 | 32.643 | P | 0.200 | 0.242  |
| SNA7 | 2006 | 229 | 15 | 31 | 33.984 | P | 0.200 | 0.250  |
| WCN  | 2006 | 229 | 15 | 31 | 33.178 | P | 0.200 | 0.191  |
| SNA8 | 2006 | 229 | 15 | 31 | 34.663 | P | 0.200 | 0.181  |
| SN97 | 2006 | 229 | 15 | 31 | 35.107 | P | 0.200 | 0.181  |
| MHC  | 2006 | 229 | 15 | 31 | 34.244 | P | 0.200 | -0.145 |
| R05C | 2006 | 229 | 15 | 31 | 34.385 | P | 0.200 | -0.057 |
| S04C | 2006 | 229 | 15 | 31 | 34.513 | P | 0.200 | -0.240 |
| O08A | 2006 | 229 | 15 | 31 | 34.898 | P | 0.200 | 0.465  |
| SN93 | 2006 | 229 | 15 | 31 | 34.908 | P | 0.200 | 0.414  |
| SN84 | 2006 | 229 | 15 | 31 | 36.111 | P | 0.200 | -0.386 |
| P07A | 2006 | 229 | 15 | 31 | 35.316 | P | 0.200 | 0.224  |
| SN85 | 2006 | 229 | 15 | 31 | 36.562 | P | 0.200 | -0.131 |
| SN96 | 2006 | 229 | 15 | 31 | 35.578 | P | 0.200 | 0.014  |
| CMB  | 2006 | 229 | 15 | 31 | 35.808 | P | 0.200 | -0.075 |
| SN74 | 2006 | 229 | 15 | 31 | 37.669 | P | 0.200 | -0.275 |
| PACP | 2006 | 229 | 15 | 31 | 36.978 | P | 0.200 | -0.015 |
| SAO  | 2006 | 229 | 15 | 31 | 37.023 | P | 0.200 | -0.340 |
| BMN  | 2006 | 229 | 15 | 31 | 37.311 | P | 0.200 | 0.178  |
| R06C | 2006 | 229 | 15 | 31 | 37.660 | P | 0.200 | 0.221  |
| P08A | 2006 | 229 | 15 | 31 | 37.871 | P | 0.200 | 0.657  |
| Q07A | 2006 | 229 | 15 | 31 | 37.984 | P | 0.200 | 0.226  |
| HAST | 2006 | 229 | 15 | 31 | 38.182 | P | 0.200 | -0.433 |
| S05C | 2006 | 229 | 15 | 31 | 38.399 | P | 0.200 | -0.602 |
| S06C | 2006 | 229 | 15 | 31 | 38.411 | P | 0.200 | -0.257 |
| SN64 | 2006 | 229 | 15 | 31 | 39.561 | P | 0.200 | -0.096 |
| O09A | 2006 | 229 | 15 | 31 | 38.796 | P | 0.200 | 0.580  |
| SN55 | 2006 | 229 | 15 | 31 | 40.782 | P | 0.200 | 0.080  |
| T05C | 2006 | 229 | 15 | 31 | 40.011 | P | 0.200 | 0.331  |
| SN43 | 2006 | 229 | 15 | 31 | 41.825 | P | 0.200 | -0.332 |
| R07C | 2006 | 229 | 15 | 31 | 41.012 | P | 0.200 | 0.180  |
| V03C | 2006 | 229 | 15 | 31 | 41.308 | P | 0.200 | 0.090  |
| Q08A | 2006 | 229 | 15 | 31 | 41.422 | P | 0.200 | 0.023  |
| P09A | 2006 | 229 | 15 | 31 | 41.430 | P | 0.200 | 0.236  |
| SN45 | 2006 | 229 | 15 | 31 | 42.569 | P | 0.200 | 0.193  |
| U04C | 2006 | 229 | 15 | 31 | 41.775 | P | 0.200 | 0.206  |
| T06C | 2006 | 229 | 15 | 31 | 42.445 | P | 0.200 | -0.293 |
| SN34 | 2006 | 229 | 15 | 31 | 43.684 | P | 0.200 | -0.110 |
| R08A | 2006 | 229 | 15 | 31 | 43.046 | P | 0.200 | 0.231  |
| SN24 | 2006 | 229 | 15 | 31 | 44.429 | P | 0.200 | -0.051 |
| P10A | 2006 | 229 | 15 | 31 | 43.575 | P | 0.200 | 0.249  |
| PKD  | 2006 | 229 | 15 | 31 | 43.880 | P | 0.200 | -0.332 |
| MLAC | 2006 | 229 | 15 | 31 | 43.974 | P | 0.200 | 0.454  |
| Q09A | 2006 | 229 | 15 | 31 | 44.214 | P | 0.200 | 0.175  |
| RAMR | 2006 | 229 | 15 | 31 | 44.439 | P | 0.200 | 0.248  |
| U05C | 2006 | 229 | 15 | 31 | 44.457 | P | 0.200 | 0.541  |
| HELL | 2006 | 229 | 15 | 31 | 46.003 | P | 0.200 | -0.693 |
| PHL  | 2006 | 229 | 15 | 31 | 46.393 | P | 0.200 | 0.059  |
| RCT  | 2006 | 229 | 15 | 31 | 46.654 | P | 0.200 | -0.563 |

|      |      |     |    |    |        |   |       |        |
|------|------|-----|----|----|--------|---|-------|--------|
| S08C | 2006 | 229 | 15 | 31 | 46.746 | P | 0.200 | 0.228  |
| R09A | 2006 | 229 | 15 | 31 | 46.843 | P | 0.200 | -0.191 |
| V05C | 2006 | 229 | 15 | 31 | 47.137 | P | 0.200 | 0.424  |
| TPH  | 2006 | 229 | 15 | 31 | 47.172 | P | 0.200 | -0.120 |
| TIN  | 2006 | 229 | 15 | 31 | 48.185 | P | 0.200 | 0.146  |
| S09A | 2006 | 229 | 15 | 31 | 48.663 | P | 0.200 | -0.072 |
| VES  | 2006 | 229 | 15 | 31 | 48.896 | P | 0.200 | -0.976 |
| SMM  | 2006 | 229 | 15 | 31 | 49.041 | P | 0.200 | 0.156  |
| Q11A | 2006 | 229 | 15 | 31 | 49.234 | P | 0.200 | -0.176 |
| R10A | 2006 | 229 | 15 | 31 | 49.700 | P | 0.200 | 0.119  |
| CWC  | 2006 | 229 | 15 | 31 | 50.979 | P | 0.200 | -0.216 |
| GRA  | 2006 | 229 | 15 | 31 | 51.425 | P | 0.200 | 0.358  |
| MPP  | 2006 | 229 | 15 | 31 | 51.652 | P | 0.200 | 0.202  |
| ISA  | 2006 | 229 | 15 | 31 | 51.781 | P | 0.200 | -1.033 |
| ARV  | 2006 | 229 | 15 | 31 | 52.930 | P | 0.200 | -0.841 |
| SBC  | 2006 | 229 | 15 | 31 | 53.500 | P | 0.200 | -0.064 |
| MPM  | 2006 | 229 | 15 | 31 | 54.683 | P | 0.200 | -0.219 |
| FUR  | 2006 | 229 | 15 | 31 | 55.132 | P | 0.200 | 0.180  |
| SCZ2 | 2006 | 229 | 15 | 31 | 55.216 | P | 0.200 | -0.422 |
| LRL  | 2006 | 229 | 15 | 31 | 56.208 | P | 0.200 | -0.352 |
| SLA  | 2006 | 229 | 15 | 31 | 56.213 | P | 0.200 | -0.049 |
| OSI  | 2006 | 229 | 15 | 31 | 56.226 | P | 0.200 | -0.248 |
| LGU  | 2006 | 229 | 15 | 31 | 56.537 | P | 0.200 | -0.821 |
| TOV  | 2006 | 229 | 15 | 31 | 57.413 | P | 0.200 | -0.548 |
| U10A | 2006 | 229 | 15 | 31 | 57.633 | P | 0.200 | 0.522  |
| EDW2 | 2006 | 229 | 15 | 31 | 57.739 | P | 0.200 | -0.058 |
| DJJ  | 2006 | 229 | 15 | 31 | 58.774 | P | 0.200 | -0.636 |
| DEC  | 2006 | 229 | 15 | 31 | 58.784 | P | 0.200 | -0.544 |
| SNCC | 2006 | 229 | 15 | 31 | 58.909 | P | 0.200 | -0.430 |
| VCS  | 2006 | 229 | 15 | 31 | 59.129 | P | 0.200 | -0.050 |
| SHO  | 2006 | 229 | 15 | 31 | 59.477 | P | 0.200 | -0.119 |
| PAS  | 2006 | 229 | 15 | 31 | 59.652 | P | 0.200 | -0.671 |
| CHF  | 2006 | 229 | 15 | 31 | 59.837 | P | 0.200 | -0.313 |
| GSC  | 2006 | 229 | 15 | 32 | 0.073  | P | 0.200 | -0.217 |
| MWC  | 2006 | 229 | 15 | 32 | 0.135  | P | 0.200 | -0.508 |
| USC  | 2006 | 229 | 15 | 32 | 0.389  | P | 0.200 | 0.011  |
| RPV  | 2006 | 229 | 15 | 32 | 0.681  | P | 0.200 | -0.527 |
| U11A | 2006 | 229 | 15 | 32 | 0.712  | P | 0.200 | 0.315  |
| FMP  | 2006 | 229 | 15 | 32 | 1.152  | P | 0.200 | -0.392 |
| ADO  | 2006 | 229 | 15 | 32 | 1.254  | P | 0.200 | -0.128 |
| BFS  | 2006 | 229 | 15 | 32 | 1.280  | P | 0.200 | -0.576 |
| RRX  | 2006 | 229 | 15 | 32 | 1.311  | P | 0.200 | -0.011 |
| CIA  | 2006 | 229 | 15 | 32 | 1.931  | P | 0.200 | -0.692 |
| TUQ  | 2006 | 229 | 15 | 32 | 2.802  | P | 0.200 | -0.001 |
| SVD  | 2006 | 229 | 15 | 32 | 3.798  | P | 0.200 | -0.578 |
| HEC  | 2006 | 229 | 15 | 32 | 3.849  | P | 0.200 | -0.103 |
| BBR  | 2006 | 229 | 15 | 32 | 3.960  | P | 0.200 | -0.613 |
| SDD  | 2006 | 229 | 15 | 32 | 4.403  | P | 0.200 | -0.102 |

|      |      |     |    |         |          |           |          |        |       |
|------|------|-----|----|---------|----------|-----------|----------|--------|-------|
| 2007 | 150  | 20  | 22 | 13.3648 | 52.13700 | 157.29300 | 116.0000 | 330    | 0.000 |
| I03A | 2007 | 150 | 20 | 31      | 4.677    | P         | 0.200    | 0.347  |       |
| K01A | 2007 | 150 | 20 | 31      | 5.171    | P         | 0.200    | 0.343  |       |
| J02A | 2007 | 150 | 20 | 31      | 6.454    | P         | 0.200    | 0.433  |       |
| I04A | 2007 | 150 | 20 | 31      | 8.728    | P         | 0.200    | -0.170 |       |
| DBO  | 2007 | 150 | 20 | 31      | 9.059    | P         | 0.200    | 0.383  |       |
| J03A | 2007 | 150 | 20 | 31      | 9.127    | P         | 0.200    | 0.621  |       |
| K02A | 2007 | 150 | 20 | 31      | 9.702    | P         | 0.200    | 0.498  |       |
| M01C | 2007 | 150 | 20 | 31      | 11.424   | P         | 0.200    | 0.652  |       |
| L02A | 2007 | 150 | 20 | 31      | 12.092   | P         | 0.200    | 0.472  |       |
| HUMO | 2007 | 150 | 20 | 31      | 12.744   | P         | 0.200    | 0.559  |       |
| J04A | 2007 | 150 | 20 | 31      | 13.203   | P         | 0.200    | 0.218  |       |
| J05A | 2007 | 150 | 20 | 31      | 16.793   | P         | 0.200    | 0.578  |       |
| JCC  | 2007 | 150 | 20 | 31      | 16.805   | P         | 0.200    | 0.661  |       |

|      |      |     |    |    |        |   |       |        |
|------|------|-----|----|----|--------|---|-------|--------|
| K04A | 2007 | 150 | 20 | 31 | 17.703 | P | 0.200 | 0.371  |
| YBH  | 2007 | 150 | 20 | 31 | 18.252 | P | 0.200 | 0.847  |
| L04A | 2007 | 150 | 20 | 31 | 19.084 | P | 0.200 | 0.344  |
| M02C | 2007 | 150 | 20 | 31 | 19.383 | P | 0.200 | 0.972  |
| N02C | 2007 | 150 | 20 | 31 | 19.681 | P | 0.200 | 0.445  |
| K05A | 2007 | 150 | 20 | 31 | 21.055 | P | 0.200 | 0.726  |
| O01C | 2007 | 150 | 20 | 31 | 21.208 | P | 0.200 | 0.925  |
| M04C | 2007 | 150 | 20 | 31 | 21.325 | P | 0.200 | 0.405  |
| M03C | 2007 | 150 | 20 | 31 | 22.343 | P | 0.200 | 0.194  |
| WDC  | 2007 | 150 | 20 | 31 | 23.891 | P | 0.200 | 0.342  |
| L05A | 2007 | 150 | 20 | 31 | 24.493 | P | 0.200 | 0.631  |
| O02C | 2007 | 150 | 20 | 31 | 25.205 | P | 0.200 | 0.566  |
| P01C | 2007 | 150 | 20 | 31 | 25.828 | P | 0.200 | 0.243  |
| M05C | 2007 | 150 | 20 | 31 | 26.112 | P | 0.200 | 0.286  |
| HATC | 2007 | 150 | 20 | 31 | 27.426 | P | 0.200 | 0.348  |
| GASB | 2007 | 150 | 20 | 31 | 28.178 | P | 0.200 | 0.652  |
| O03C | 2007 | 150 | 20 | 31 | 28.267 | P | 0.200 | -0.264 |
| M06C | 2007 | 150 | 20 | 31 | 29.790 | P | 0.200 | 0.459  |
| L07A | 2007 | 150 | 20 | 31 | 30.642 | P | 0.200 | 0.507  |
| O04C | 2007 | 150 | 20 | 31 | 31.408 | P | 0.200 | 0.339  |
| SNG5 | 2007 | 150 | 20 | 31 | 31.496 | P | 0.200 | -0.483 |
| ELFS | 2007 | 150 | 20 | 31 | 31.587 | P | 0.200 | 0.551  |
| SNG7 | 2007 | 150 | 20 | 31 | 31.919 | P | 0.200 | 0.150  |
| ORV  | 2007 | 150 | 20 | 31 | 32.250 | P | 0.200 | -0.642 |
| SUTB | 2007 | 150 | 20 | 31 | 32.496 | P | 0.200 | -0.761 |
| MNRC | 2007 | 150 | 20 | 31 | 32.823 | P | 0.200 | 0.467  |
| MCCM | 2007 | 150 | 20 | 31 | 33.366 | P | 0.200 | -0.470 |
| O05C | 2007 | 150 | 20 | 31 | 33.575 | P | 0.200 | 0.220  |
| SNF6 | 2007 | 150 | 20 | 31 | 33.767 | P | 0.200 | -0.319 |
| M07A | 2007 | 150 | 20 | 31 | 34.146 | P | 0.200 | 0.455  |
| N06A | 2007 | 150 | 20 | 31 | 34.346 | P | 0.200 | 0.225  |
| CVS  | 2007 | 150 | 20 | 31 | 34.397 | P | 0.200 | -0.376 |
| SNF8 | 2007 | 150 | 20 | 31 | 34.468 | P | 0.200 | -0.014 |
| SNF9 | 2007 | 150 | 20 | 31 | 34.495 | P | 0.200 | 0.002  |
| SNE4 | 2007 | 150 | 20 | 31 | 34.771 | P | 0.200 | -0.143 |
| SNE5 | 2007 | 150 | 20 | 31 | 34.915 | P | 0.200 | -0.307 |
| FARB | 2007 | 150 | 20 | 31 | 35.086 | P | 0.200 | -0.412 |
| SNE6 | 2007 | 150 | 20 | 31 | 35.706 | P | 0.200 | -0.409 |
| BEK  | 2007 | 150 | 20 | 31 | 36.118 | P | 0.200 | -0.204 |
| Q03C | 2007 | 150 | 20 | 31 | 36.139 | P | 0.200 | 0.974  |
| SNE9 | 2007 | 150 | 20 | 31 | 36.250 | P | 0.200 | 0.017  |
| SND7 | 2007 | 150 | 20 | 31 | 36.301 | P | 0.200 | -0.176 |
| SND4 | 2007 | 150 | 20 | 31 | 36.462 | P | 0.200 | -0.297 |
| Q04C | 2007 | 150 | 20 | 31 | 36.722 | P | 0.200 | -0.026 |
| SND5 | 2007 | 150 | 20 | 31 | 36.730 | P | 0.200 | -0.298 |
| O06A | 2007 | 150 | 20 | 31 | 37.086 | P | 0.200 | 0.182  |
| BRK  | 2007 | 150 | 20 | 31 | 37.509 | P | 0.200 | -0.361 |
| SND8 | 2007 | 150 | 20 | 31 | 37.659 | P | 0.200 | -0.179 |
| N07B | 2007 | 150 | 20 | 31 | 37.727 | P | 0.200 | 0.285  |
| BKS  | 2007 | 150 | 20 | 31 | 37.801 | P | 0.200 | -0.096 |
| P05C | 2007 | 150 | 20 | 31 | 37.878 | P | 0.200 | -0.090 |
| BRIB | 2007 | 150 | 20 | 31 | 37.940 | P | 0.200 | -0.053 |
| SND9 | 2007 | 150 | 20 | 31 | 38.084 | P | 0.200 | 0.161  |
| SNC5 | 2007 | 150 | 20 | 31 | 38.263 | P | 0.200 | -0.234 |
| SNC4 | 2007 | 150 | 20 | 31 | 38.327 | P | 0.200 | -0.270 |
| SNC3 | 2007 | 150 | 20 | 31 | 38.524 | P | 0.200 | 0.371  |
| SNC7 | 2007 | 150 | 20 | 31 | 38.766 | P | 0.200 | -0.115 |
| P06A | 2007 | 150 | 20 | 31 | 39.147 | P | 0.200 | 0.231  |
| BDM  | 2007 | 150 | 20 | 31 | 39.153 | P | 0.200 | 0.067  |
| SNC6 | 2007 | 150 | 20 | 31 | 39.592 | P | 0.200 | -0.063 |
| JRSC | 2007 | 150 | 20 | 31 | 39.687 | P | 0.200 | -0.558 |
| LAVA | 2007 | 150 | 20 | 31 | 39.740 | P | 0.200 | -0.207 |
| SNB3 | 2007 | 150 | 20 | 31 | 39.948 | P | 0.200 | 0.160  |

|      |      |     |    |    |        |   |       |        |
|------|------|-----|----|----|--------|---|-------|--------|
| SNC8 | 2007 | 150 | 20 | 31 | 40.115 | P | 0.200 | 0.524  |
| SNB5 | 2007 | 150 | 20 | 31 | 40.252 | P | 0.200 | -0.165 |
| WENL | 2007 | 150 | 20 | 31 | 41.114 | P | 0.200 | -0.071 |
| O07A | 2007 | 150 | 20 | 31 | 41.133 | P | 0.200 | 0.328  |
| SNB7 | 2007 | 150 | 20 | 31 | 41.137 | P | 0.200 | -0.014 |
| R04C | 2007 | 150 | 20 | 31 | 41.150 | P | 0.200 | -0.217 |
| N08A | 2007 | 150 | 20 | 31 | 41.167 | P | 0.200 | 0.347  |
| BNLO | 2007 | 150 | 20 | 31 | 41.286 | P | 0.200 | -0.574 |
| SNA4 | 2007 | 150 | 20 | 31 | 41.902 | P | 0.200 | -0.121 |
| SNA3 | 2007 | 150 | 20 | 31 | 42.022 | P | 0.200 | 0.217  |
| SNB9 | 2007 | 150 | 20 | 31 | 42.079 | P | 0.200 | 0.257  |
| SNA5 | 2007 | 150 | 20 | 31 | 42.226 | P | 0.200 | -0.194 |
| SNA7 | 2007 | 150 | 20 | 31 | 42.652 | P | 0.200 | 0.321  |
| MHC  | 2007 | 150 | 20 | 31 | 42.949 | P | 0.200 | -0.236 |
| R05C | 2007 | 150 | 20 | 31 | 43.147 | P | 0.200 | 0.020  |
| SNA8 | 2007 | 150 | 20 | 31 | 43.310 | P | 0.200 | 0.172  |
| S04C | 2007 | 150 | 20 | 31 | 43.399 | P | 0.200 | -0.171 |
| O08A | 2007 | 150 | 20 | 31 | 43.647 | P | 0.200 | 0.540  |
| SN93 | 2007 | 150 | 20 | 31 | 43.712 | P | 0.200 | 0.444  |
| SN97 | 2007 | 150 | 20 | 31 | 43.826 | P | 0.200 | 0.165  |
| P07A | 2007 | 150 | 20 | 31 | 44.135 | P | 0.200 | 0.330  |
| SN96 | 2007 | 150 | 20 | 31 | 44.485 | P | 0.200 | 0.114  |
| CMB  | 2007 | 150 | 20 | 31 | 44.873 | P | 0.200 | 0.065  |
| SN86 | 2007 | 150 | 20 | 31 | 45.503 | P | 0.200 | 0.166  |
| SN87 | 2007 | 150 | 20 | 31 | 45.529 | P | 0.200 | 0.367  |
| PACP | 2007 | 150 | 20 | 31 | 46.132 | P | 0.200 | -0.026 |
| SAO  | 2007 | 150 | 20 | 31 | 46.363 | P | 0.200 | -0.250 |
| BMN  | 2007 | 150 | 20 | 31 | 46.467 | P | 0.200 | 0.308  |
| R06C | 2007 | 150 | 20 | 31 | 46.746 | P | 0.200 | 0.258  |
| P08A | 2007 | 150 | 20 | 31 | 46.970 | P | 0.200 | 0.745  |
| Q07A | 2007 | 150 | 20 | 31 | 47.169 | P | 0.200 | 0.296  |
| SN75 | 2007 | 150 | 20 | 31 | 47.575 | P | 0.200 | 0.019  |
| HAST | 2007 | 150 | 20 | 31 | 47.613 | P | 0.200 | -0.428 |
| S06C | 2007 | 150 | 20 | 31 | 47.695 | P | 0.200 | -0.216 |
| S05C | 2007 | 150 | 20 | 31 | 47.796 | P | 0.200 | -0.564 |
| O09A | 2007 | 150 | 20 | 31 | 48.101 | P | 0.200 | 0.693  |
| SN63 | 2007 | 150 | 20 | 31 | 48.736 | P | 0.200 | -0.234 |
| SN64 | 2007 | 150 | 20 | 31 | 48.941 | P | 0.200 | -0.049 |
| T05C | 2007 | 150 | 20 | 31 | 49.486 | P | 0.200 | 0.329  |
| R07C | 2007 | 150 | 20 | 31 | 50.521 | P | 0.200 | 0.244  |
| V03C | 2007 | 150 | 20 | 31 | 50.996 | P | 0.200 | -0.020 |
| Q08A | 2007 | 150 | 20 | 31 | 51.089 | P | 0.200 | 0.177  |
| P09A | 2007 | 150 | 20 | 31 | 51.132 | P | 0.200 | 0.424  |
| U04C | 2007 | 150 | 20 | 31 | 51.532 | P | 0.200 | 0.201  |
| T06C | 2007 | 150 | 20 | 31 | 52.255 | P | 0.200 | -0.288 |
| R08A | 2007 | 150 | 20 | 31 | 52.869 | P | 0.200 | 0.307  |
| P10A | 2007 | 150 | 20 | 31 | 53.452 | P | 0.200 | 0.353  |
| MLAC | 2007 | 150 | 20 | 31 | 53.939 | P | 0.200 | 0.605  |
| PKD  | 2007 | 150 | 20 | 31 | 54.045 | P | 0.200 | -0.275 |
| Q09A | 2007 | 150 | 20 | 31 | 54.332 | P | 0.200 | 0.405  |
| U05C | 2007 | 150 | 20 | 31 | 54.403 | P | 0.200 | 0.423  |
| V04C | 2007 | 150 | 20 | 31 | 54.466 | P | 0.200 | 0.089  |
| HELL | 2007 | 150 | 20 | 31 | 56.348 | P | 0.200 | -0.648 |
| PHL  | 2007 | 150 | 20 | 31 | 56.745 | P | 0.200 | -0.047 |
| RCT  | 2007 | 150 | 20 | 31 | 56.982 | P | 0.200 | -0.675 |
| S08C | 2007 | 150 | 20 | 31 | 57.075 | P | 0.200 | 0.373  |
| Q10A | 2007 | 150 | 20 | 31 | 57.143 | P | 0.200 | 0.071  |
| R09A | 2007 | 150 | 20 | 31 | 57.187 | P | 0.200 | -0.109 |
| TPH  | 2007 | 150 | 20 | 31 | 57.391 | P | 0.200 | -0.174 |
| V05C | 2007 | 150 | 20 | 31 | 57.462 | P | 0.200 | 0.314  |
| TIN  | 2007 | 150 | 20 | 31 | 58.597 | P | 0.200 | 0.158  |
| S09A | 2007 | 150 | 20 | 31 | 59.179 | P | 0.200 | -0.034 |
| SMM  | 2007 | 150 | 20 | 31 | 59.573 | P | 0.200 | -0.054 |

|      |      |     |    |    |        |   |       |        |
|------|------|-----|----|----|--------|---|-------|--------|
| VES  | 2007 | 150 | 20 | 31 | 59.623 | P | 0.200 | -1.027 |
| Q11A | 2007 | 150 | 20 | 31 | 59.943 | P | 0.200 | -0.026 |
| R10A | 2007 | 150 | 20 | 32 | 0.065  | P | 0.200 | -0.078 |
| S10A | 2007 | 150 | 20 | 32 | 0.689  | P | 0.200 | -0.045 |
| BAK  | 2007 | 150 | 20 | 32 | 1.455  | P | 0.200 | -1.491 |
| CWC  | 2007 | 150 | 20 | 32 | 1.918  | P | 0.200 | -0.126 |
| GRA  | 2007 | 150 | 20 | 32 | 2.295  | P | 0.200 | 0.367  |
| R11A | 2007 | 150 | 20 | 32 | 2.458  | P | 0.200 | -0.078 |
| MPP  | 2007 | 150 | 20 | 32 | 2.477  | P | 0.200 | -0.071 |
| ARV  | 2007 | 150 | 20 | 32 | 4.305  | P | 0.200 | -0.811 |
| SBC  | 2007 | 150 | 20 | 32 | 4.750  | P | 0.200 | -0.207 |
| S11A | 2007 | 150 | 20 | 32 | 5.484  | P | 0.200 | 0.150  |
| MPM  | 2007 | 150 | 20 | 32 | 5.953  | P | 0.200 | -0.263 |
| FUR  | 2007 | 150 | 20 | 32 | 6.381  | P | 0.200 | 0.045  |
| TPNV | 2007 | 150 | 20 | 32 | 6.595  | P | 0.200 | -0.192 |
| SCZ2 | 2007 | 150 | 20 | 32 | 6.634  | P | 0.200 | -0.742 |
| SLA  | 2007 | 150 | 20 | 32 | 7.521  | P | 0.200 | -0.253 |
| LRL  | 2007 | 150 | 20 | 32 | 7.644  | P | 0.200 | -0.523 |
| OSI  | 2007 | 150 | 20 | 32 | 7.915  | P | 0.200 | -0.253 |
| LGU  | 2007 | 150 | 20 | 32 | 8.309  | P | 0.200 | -0.919 |
| U10A | 2007 | 150 | 20 | 32 | 9.043  | P | 0.200 | 0.288  |
| T11A | 2007 | 150 | 20 | 32 | 9.219  | P | 0.200 | -0.015 |
| EDW2 | 2007 | 150 | 20 | 32 | 9.312  | P | 0.200 | -0.338 |
| DEC  | 2007 | 150 | 20 | 32 | 10.710 | P | 0.200 | -0.706 |
| DJJ  | 2007 | 150 | 20 | 32 | 10.744 | P | 0.200 | -0.807 |
| SNCC | 2007 | 150 | 20 | 32 | 10.959 | P | 0.200 | -0.620 |
| VCS  | 2007 | 150 | 20 | 32 | 11.049 | P | 0.200 | -0.156 |
| SHO  | 2007 | 150 | 20 | 32 | 11.316 | P | 0.200 | -0.252 |
| PASC | 2007 | 150 | 20 | 32 | 11.595 | P | 0.200 | -0.724 |
| CHF  | 2007 | 150 | 20 | 32 | 11.989 | P | 0.200 | -0.349 |
| GSC  | 2007 | 150 | 20 | 32 | 12.090 | P | 0.200 | -0.290 |
| MWC  | 2007 | 150 | 20 | 32 | 12.193 | P | 0.200 | -0.669 |
| USC  | 2007 | 150 | 20 | 32 | 12.383 | P | 0.200 | -0.253 |
| U11A | 2007 | 150 | 20 | 32 | 12.588 | P | 0.200 | 0.123  |
| RPV  | 2007 | 150 | 20 | 32 | 12.753 | P | 0.200 | -0.840 |
| RRX  | 2007 | 150 | 20 | 32 | 13.356 | P | 0.200 | -0.244 |
| ADO  | 2007 | 150 | 20 | 32 | 13.366 | P | 0.200 | -0.289 |
| FMP  | 2007 | 150 | 20 | 32 | 13.388 | P | 0.200 | -0.618 |
| VTV  | 2007 | 150 | 20 | 32 | 13.576 | P | 0.200 | -0.304 |
| BFS  | 2007 | 150 | 20 | 32 | 13.742 | P | 0.200 | -0.490 |
| CIA  | 2007 | 150 | 20 | 32 | 14.420 | P | 0.200 | -0.797 |
| TUQ  | 2007 | 150 | 20 | 32 | 14.918 | P | 0.200 | -0.292 |
| V11A | 2007 | 150 | 20 | 32 | 15.179 | P | 0.200 | -0.058 |
| HEC  | 2007 | 150 | 20 | 32 | 16.104 | P | 0.200 | -0.407 |
| SVD  | 2007 | 150 | 20 | 32 | 16.476 | P | 0.200 | -0.584 |
| BBR  | 2007 | 150 | 20 | 32 | 16.565 | P | 0.200 | -0.653 |
| SDD  | 2007 | 150 | 20 | 32 | 16.999 | P | 0.200 | -0.324 |

|      |      |     |    |         |          |           |         |        |       |
|------|------|-----|----|---------|----------|-----------|---------|--------|-------|
| 1988 | 246  | 10  | 27 | 51.1926 | 53.98600 | 161.53500 | 48.0000 | 433    | 0.000 |
| arc  | 1988 | 246 | 10 | 37      | 27.070   | P         | 0.200   | 0.018  |       |
| bkr  | 1988 | 246 | 10 | 37      | 27.750   | P         | 0.200   | 0.572  |       |
| bmd  | 1988 | 246 | 10 | 37      | 27.600   | P         | 0.200   | -0.183 |       |
| ccr  | 1988 | 246 | 10 | 37      | 22.480   | P         | 0.200   | 0.185  |       |
| cdg  | 1988 | 246 | 10 | 37      | 22.100   | P         | 0.200   | 0.549  |       |
| jhn  | 1988 | 246 | 10 | 37      | 26.140   | P         | 0.200   | -0.230 |       |
| mnk  | 1988 | 246 | 10 | 37      | 23.860   | P         | 0.200   | 0.168  |       |
| WMD  | 1988 | 246 | 10 | 37      | 25.320   | P         | 0.200   | 0.099  |       |
| twr  | 1988 | 246 | 10 | 37      | 25.200   | P         | 0.200   | 0.137  |       |
| CLC  | 1988 | 246 | 10 | 37      | 30.910   | P         | 0.200   | 0.008  |       |
| SRT  | 1988 | 246 | 10 | 37      | 30.970   | P         | 0.200   | 0.064  |       |
| WCH  | 1988 | 246 | 10 | 37      | 28.650   | P         | 0.200   | -0.207 |       |
| WLH  | 1988 | 246 | 10 | 37      | 26.610   | P         | 0.200   | 0.116  |       |
| WRC  | 1988 | 246 | 10 | 37      | 30.110   | P         | 0.200   | 0.157  |       |

|     |      |     |    |    |        |   |       |        |
|-----|------|-----|----|----|--------|---|-------|--------|
| WSC | 1988 | 246 | 10 | 37 | 29.920 | P | 0.200 | -0.379 |
| WVP | 1988 | 246 | 10 | 37 | 29.550 | P | 0.200 | 0.202  |
| XMS | 1988 | 246 | 10 | 37 | 33.540 | P | 0.200 | 0.331  |
| DTP | 1988 | 246 | 10 | 37 | 32.300 | P | 0.200 | -0.355 |
| ISA | 1988 | 246 | 10 | 37 | 27.450 | P | 0.200 | -0.541 |
| WJP | 1988 | 246 | 10 | 37 | 28.610 | P | 0.200 | -0.711 |

|      |     |    |    |         |          |           |          |     |       |
|------|-----|----|----|---------|----------|-----------|----------|-----|-------|
| 1988 | 227 | 10 | 56 | 59.3646 | 54.61300 | 152.67700 | 645.0000 | 426 | 0.000 |
|------|-----|----|----|---------|----------|-----------|----------|-----|-------|

|     |      |     |    |   |        |   |       |        |
|-----|------|-----|----|---|--------|---|-------|--------|
| arc | 1988 | 227 | 11 | 6 | 12.720 | P | 0.200 | 0.045  |
| bkr | 1988 | 227 | 11 | 6 | 12.410 | P | 0.200 | -0.464 |
| ccr | 1988 | 227 | 11 | 6 | 8.480  | P | 0.200 | 0.187  |
| cdg | 1988 | 227 | 11 | 6 | 7.680  | P | 0.200 | 0.137  |
| jhn | 1988 | 227 | 11 | 6 | 11.850 | P | 0.200 | -0.257 |
| mnk | 1988 | 227 | 11 | 6 | 9.800  | P | 0.200 | 0.224  |
| ndl | 1988 | 227 | 11 | 6 | 11.700 | P | 0.200 | 0.077  |
| pmt | 1988 | 227 | 11 | 6 | 13.070 | P | 0.200 | -0.040 |
| WMD | 1988 | 227 | 11 | 6 | 11.130 | P | 0.200 | 0.086  |
| cou | 1988 | 227 | 11 | 6 | 11.440 | P | 0.200 | 0.272  |
| twr | 1988 | 227 | 11 | 6 | 10.960 | P | 0.200 | 0.122  |
| wil | 1988 | 227 | 11 | 6 | 11.460 | P | 0.200 | 0.119  |
| BMT | 1988 | 227 | 11 | 6 | 15.720 | P | 0.200 | -0.148 |
| BNP | 1988 | 227 | 11 | 6 | 4.160  | P | 0.200 | 0.810  |
| CAL | 1988 | 227 | 11 | 6 | 18.330 | P | 0.200 | 0.146  |
| CLC | 1988 | 227 | 11 | 6 | 16.210 | P | 0.200 | 0.091  |
| DTP | 1988 | 227 | 11 | 6 | 17.850 | P | 0.200 | 0.003  |
| FRI | 1988 | 227 | 11 | 6 | 2.830  | P | 0.200 | 0.041  |
| GSC | 1988 | 227 | 11 | 6 | 21.510 | P | 0.200 | 0.272  |
| JFS | 1988 | 227 | 11 | 6 | 18.300 | P | 0.200 | 0.243  |
| LRM | 1988 | 227 | 11 | 6 | 17.360 | P | 0.200 | -0.043 |
| SRT | 1988 | 227 | 11 | 6 | 16.410 | P | 0.200 | 0.240  |
| TEJ | 1988 | 227 | 11 | 6 | 14.750 | P | 0.200 | -0.258 |
| TOW | 1988 | 227 | 11 | 6 | 16.020 | P | 0.200 | 0.483  |
| WAS | 1988 | 227 | 11 | 6 | 12.560 | P | 0.200 | -0.683 |
| WBM | 1988 | 227 | 11 | 6 | 15.910 | P | 0.200 | -0.194 |
| WBS | 1988 | 227 | 11 | 6 | 14.950 | P | 0.200 | -0.626 |
| WCH | 1988 | 227 | 11 | 6 | 14.260 | P | 0.200 | -0.080 |
| WCS | 1988 | 227 | 11 | 6 | 14.860 | P | 0.200 | 0.331  |
| WHF | 1988 | 227 | 11 | 6 | 13.330 | P | 0.200 | -0.648 |
| WHS | 1988 | 227 | 11 | 6 | 14.390 | P | 0.200 | 0.185  |
| WHV | 1988 | 227 | 11 | 6 | 13.620 | P | 0.200 | -0.714 |
| WJP | 1988 | 227 | 11 | 6 | 14.300 | P | 0.200 | -0.579 |
| WLH | 1988 | 227 | 11 | 6 | 12.260 | P | 0.200 | 0.112  |
| WOR | 1988 | 227 | 11 | 6 | 13.760 | P | 0.200 | -0.698 |
| WRC | 1988 | 227 | 11 | 6 | 15.500 | P | 0.200 | 0.292  |
| WRV | 1988 | 227 | 11 | 6 | 14.330 | P | 0.200 | 0.215  |
| WSC | 1988 | 227 | 11 | 6 | 15.430 | P | 0.200 | -0.191 |
| WVP | 1988 | 227 | 11 | 6 | 15.020 | P | 0.200 | 0.327  |
| XMS | 1988 | 227 | 11 | 6 | 18.760 | P | 0.200 | 0.562  |

|      |     |   |    |         |          |          |        |     |        |
|------|-----|---|----|---------|----------|----------|--------|-----|--------|
| 1988 | 258 | 3 | 59 | 59.3777 | 49.82000 | 78.79800 | 0.0000 | 445 | -0.001 |
|------|-----|---|----|---------|----------|----------|--------|-----|--------|

|     |      |     |   |    |        |   |       |        |
|-----|------|-----|---|----|--------|---|-------|--------|
| arc | 1988 | 258 | 4 | 13 | 15.450 | P | 0.200 | -0.099 |
| bmd | 1988 | 258 | 4 | 13 | 16.000 | P | 0.200 | -0.168 |
| ccr | 1988 | 258 | 4 | 13 | 12.580 | P | 0.200 | -0.044 |
| jhn | 1988 | 258 | 4 | 13 | 15.030 | P | 0.200 | -0.497 |
| mnk | 1988 | 258 | 4 | 13 | 13.170 | P | 0.200 | -0.250 |
| pmt | 1988 | 258 | 4 | 13 | 15.510 | P | 0.200 | -0.070 |
| BMT | 1988 | 258 | 4 | 13 | 19.020 | P | 0.200 | -0.210 |
| BNP | 1988 | 258 | 4 | 13 | 7.480  | P | 0.200 | 0.611  |
| CAL | 1988 | 258 | 4 | 13 | 20.000 | P | 0.200 | 0.282  |
| CLC | 1988 | 258 | 4 | 13 | 16.920 | P | 0.200 | 0.053  |
| DTP | 1988 | 258 | 4 | 13 | 19.410 | P | 0.200 | 0.304  |
| FRI | 1988 | 258 | 4 | 13 | 9.780  | P | 0.200 | -0.084 |
| GSC | 1988 | 258 | 4 | 13 | 20.010 | P | 0.200 | 0.343  |

|      |      |     |    |    |        |          |            |        |     |       |
|------|------|-----|----|----|--------|----------|------------|--------|-----|-------|
| ISA  | 1988 | 258 | 4  | 13 | 16.150 | P        | 0.200      | -0.615 |     |       |
| JAW  | 1988 | 258 | 4  | 13 | 18.820 | P        | 0.200      | 0.178  |     |       |
| JFS  | 1988 | 258 | 4  | 13 | 19.250 | P        | 0.200      | 0.373  |     |       |
| LRM  | 1988 | 258 | 4  | 13 | 18.460 | P        | 0.200      | 0.167  |     |       |
| TOW  | 1988 | 258 | 4  | 13 | 17.210 | P        | 0.200      | 0.446  |     |       |
| WBM  | 1988 | 258 | 4  | 13 | 17.780 | P        | 0.200      | 0.185  |     |       |
| WCH  | 1988 | 258 | 4  | 13 | 16.560 | P        | 0.200      | 0.110  |     |       |
| WCS  | 1988 | 258 | 4  | 13 | 16.000 | P        | 0.200      | 0.153  |     |       |
| WHF  | 1988 | 258 | 4  | 13 | 16.180 | P        | 0.200      | -0.581 |     |       |
| WJP  | 1988 | 258 | 4  | 13 | 17.300 | P        | 0.200      | -0.663 |     |       |
| WOR  | 1988 | 258 | 4  | 13 | 16.480 | P        | 0.200      | -0.477 |     |       |
| WSC  | 1988 | 258 | 4  | 13 | 17.100 | P        | 0.200      | -0.019 |     |       |
| WSH  | 1988 | 258 | 4  | 13 | 17.850 | P        | 0.200      | 0.239  |     |       |
| WVP  | 1988 | 258 | 4  | 13 | 16.290 | P        | 0.200      | 0.139  |     |       |
| WWP  | 1988 | 258 | 4  | 13 | 16.830 | P        | 0.200      | -0.117 |     |       |
| XMS  | 1988 | 258 | 4  | 13 | 18.480 | P        | 0.200      | 0.313  |     |       |
|      |      |     |    |    |        |          |            |        |     |       |
| 2006 | 36   | 8   | 17 |    | 2.5046 | 66.29700 | -142.68600 | 9.2000 | 108 | 0.000 |
| M06C | 2006 | 36  | 8  | 22 | 53.311 | P        | 0.200      | -0.258 |     |       |
| O02C | 2006 | 36  | 8  | 22 | 57.362 | P        | 0.200      | -0.103 |     |       |
| O04C | 2006 | 36  | 8  | 22 | 59.492 | P        | 0.200      | -0.178 |     |       |
| O05C | 2006 | 36  | 8  | 23 | 2.872  | P        | 0.200      | -0.172 |     |       |
| R05C | 2006 | 36  | 8  | 23 | 15.101 | P        | 0.200      | -0.499 |     |       |
| R06C | 2006 | 36  | 8  | 23 | 18.288 | P        | 0.200      | -0.055 |     |       |
| SN85 | 2006 | 36  | 8  | 23 | 19.069 | P        | 0.200      | -0.268 |     |       |
| SN76 | 2006 | 36  | 8  | 23 | 19.753 | P        | 0.200      | 0.045  |     |       |
| MNV  | 2006 | 36  | 8  | 23 | 21.920 | P        | 0.200      | 0.081  |     |       |
| SN57 | 2006 | 36  | 8  | 23 | 22.503 | P        | 0.200      | -0.056 |     |       |
| S06C | 2006 | 36  | 8  | 23 | 22.623 | P        | 0.200      | -0.298 |     |       |
| R07C | 2006 | 36  | 8  | 23 | 22.735 | P        | 0.200      | -0.231 |     |       |
| S04C | 2006 | 36  | 8  | 23 | 23.096 | P        | 0.200      | 0.189  |     |       |
| SN48 | 2006 | 36  | 8  | 23 | 23.223 | P        | 0.200      | -0.114 |     |       |
| SN71 | 2006 | 36  | 8  | 23 | 23.442 | P        | 0.200      | 0.005  |     |       |
| SN55 | 2006 | 36  | 8  | 23 | 23.977 | P        | 0.200      | -0.196 |     |       |
| SN47 | 2006 | 36  | 8  | 23 | 24.532 | P        | 0.200      | -0.045 |     |       |
| SN38 | 2006 | 36  | 8  | 23 | 24.657 | P        | 0.200      | -0.061 |     |       |
| SN62 | 2006 | 36  | 8  | 23 | 24.712 | P        | 0.200      | -0.227 |     |       |
| SN54 | 2006 | 36  | 8  | 23 | 24.751 | P        | 0.200      | -0.136 |     |       |
| SN53 | 2006 | 36  | 8  | 23 | 26.371 | P        | 0.200      | 0.037  |     |       |
| SN28 | 2006 | 36  | 8  | 23 | 26.528 | P        | 0.200      | 0.244  |     |       |
| SN52 | 2006 | 36  | 8  | 23 | 27.265 | P        | 0.200      | -0.031 |     |       |
| SN44 | 2006 | 36  | 8  | 23 | 27.514 | P        | 0.200      | 0.247  |     |       |
| SN51 | 2006 | 36  | 8  | 23 | 27.666 | P        | 0.200      | 0.222  |     |       |
| T06C | 2006 | 36  | 8  | 23 | 30.196 | P        | 0.200      | -0.168 |     |       |
| SN22 | 2006 | 36  | 8  | 23 | 31.240 | P        | 0.200      | 0.087  |     |       |
| SN21 | 2006 | 36  | 8  | 23 | 32.063 | P        | 0.200      | -0.223 |     |       |
| HELL | 2006 | 36  | 8  | 23 | 34.604 | P        | 0.200      | 0.025  |     |       |
| GRA  | 2006 | 36  | 8  | 23 | 35.704 | P        | 0.200      | 0.323  |     |       |
| V04C | 2006 | 36  | 8  | 23 | 39.511 | P        | 0.200      | 0.133  |     |       |
| FUR  | 2006 | 36  | 8  | 23 | 40.896 | P        | 0.200      | 0.075  |     |       |
| ISA  | 2006 | 36  | 8  | 23 | 43.964 | P        | 0.200      | -0.095 |     |       |
| SHO  | 2006 | 36  | 8  | 23 | 47.179 | P        | 0.200      | 0.206  |     |       |
| LRL  | 2006 | 36  | 8  | 23 | 47.406 | P        | 0.200      | 0.045  |     |       |
| GSC  | 2006 | 36  | 8  | 23 | 50.965 | P        | 0.200      | 0.338  |     |       |
| TUQ  | 2006 | 36  | 8  | 23 | 52.019 | P        | 0.200      | 0.445  |     |       |
| OSI  | 2006 | 36  | 8  | 23 | 52.128 | P        | 0.200      | -0.216 |     |       |
| HEC  | 2006 | 36  | 8  | 23 | 55.720 | P        | 0.200      | 0.183  |     |       |
| DEC  | 2006 | 36  | 8  | 23 | 56.155 | P        | 0.200      | 0.224  |     |       |
| BFS  | 2006 | 36  | 8  | 23 | 58.075 | P        | 0.200      | 0.474  |     |       |
|      |      |     |    |    |        |          |            |        |     |       |
| 2005 | 201  | 21  | 54 |    | 6.5313 | 43.06600 | 109.01700  | 6.0000 | 9   | 0.000 |
| WDC  | 2005 | 201 | 22 | 6  | 40.369 | P        | 0.200      | -0.263 |     |       |
| M05C | 2005 | 201 | 22 | 6  | 40.413 | P        | 0.200      | -0.344 |     |       |

|      |      |     |    |   |        |   |       |        |
|------|------|-----|----|---|--------|---|-------|--------|
| M06C | 2005 | 201 | 22 | 6 | 42.884 | P | 0.200 | 0.104  |
| O04C | 2005 | 201 | 22 | 6 | 45.065 | P | 0.200 | -0.084 |
| ORV  | 2005 | 201 | 22 | 6 | 46.173 | P | 0.200 | -1.142 |
| MNRC | 2005 | 201 | 22 | 6 | 48.417 | P | 0.200 | 0.328  |
| P05C | 2005 | 201 | 22 | 6 | 49.969 | P | 0.200 | -0.405 |
| Q03C | 2005 | 201 | 22 | 6 | 50.656 | P | 0.200 | 0.838  |
| LAVA | 2005 | 201 | 22 | 6 | 51.720 | P | 0.200 | -0.494 |
| BMN  | 2005 | 201 | 22 | 6 | 52.701 | P | 0.200 | 0.027  |
| CMB  | 2005 | 201 | 22 | 6 | 55.677 | P | 0.200 | -0.090 |
| S04C | 2005 | 201 | 22 | 6 | 55.688 | P | 0.200 | -0.311 |
| SN71 | 2005 | 201 | 22 | 6 | 56.754 | P | 0.200 | -0.517 |
| SN73 | 2005 | 201 | 22 | 6 | 56.895 | P | 0.200 | -0.391 |
| SN62 | 2005 | 201 | 22 | 6 | 57.899 | P | 0.200 | -0.545 |
| SN67 | 2005 | 201 | 22 | 6 | 57.999 | P | 0.200 | 0.418  |
| S05C | 2005 | 201 | 22 | 6 | 58.179 | P | 0.200 | -0.404 |
| PACP | 2005 | 201 | 22 | 6 | 58.237 | P | 0.200 | 0.294  |
| SAO  | 2005 | 201 | 22 | 6 | 58.352 | P | 0.200 | -0.140 |
| SN52 | 2005 | 201 | 22 | 6 | 59.263 | P | 0.200 | -0.419 |
| SN48 | 2005 | 201 | 22 | 6 | 59.644 | P | 0.200 | 0.341  |
| SN43 | 2005 | 201 | 22 | 7 | 0.366  | P | 0.200 | -0.090 |
| SN42 | 2005 | 201 | 22 | 7 | 0.381  | P | 0.200 | -0.218 |
| SN38 | 2005 | 201 | 22 | 7 | 0.527  | P | 0.200 | 0.458  |
| T06C | 2005 | 201 | 22 | 7 | 0.956  | P | 0.200 | -0.328 |
| SN37 | 2005 | 201 | 22 | 7 | 1.024  | P | 0.200 | 0.346  |
| SN23 | 2005 | 201 | 22 | 7 | 1.964  | P | 0.200 | -0.182 |
| TPH  | 2005 | 201 | 22 | 7 | 2.369  | P | 0.200 | 0.089  |
| SN11 | 2005 | 201 | 22 | 7 | 2.585  | P | 0.200 | -0.548 |
| HELL | 2005 | 201 | 22 | 7 | 3.753  | P | 0.200 | -0.277 |
| V04C | 2005 | 201 | 22 | 7 | 4.534  | P | 0.200 | 0.475  |
| RAMR | 2005 | 201 | 22 | 7 | 4.534  | P | 0.200 | 0.479  |
| GRA  | 2005 | 201 | 22 | 7 | 6.733  | P | 0.200 | 0.764  |
| CWC  | 2005 | 201 | 22 | 7 | 7.061  | P | 0.200 | -0.012 |
| SMM  | 2005 | 201 | 22 | 7 | 7.735  | P | 0.200 | 0.445  |
| FUR  | 2005 | 201 | 22 | 7 | 9.572  | P | 0.200 | 0.636  |
| LRL  | 2005 | 201 | 22 | 7 | 11.695 | P | 0.200 | 0.185  |
| EDW2 | 2005 | 201 | 22 | 7 | 13.413 | P | 0.200 | 0.367  |
| GSC  | 2005 | 201 | 22 | 7 | 14.194 | P | 0.200 | 0.278  |
| TUQ  | 2005 | 201 | 22 | 7 | 15.545 | P | 0.200 | 0.441  |
| HEC  | 2005 | 201 | 22 | 7 | 17.037 | P | 0.200 | 0.285  |
| CIA  | 2005 | 201 | 22 | 7 | 17.723 | P | 0.200 | -0.398 |

|      |      |     |    |        |          |           |         |        |       |
|------|------|-----|----|--------|----------|-----------|---------|--------|-------|
| 2005 | 188  | 2   | 17 | 6.6677 | 56.06800 | 164.60500 | 33.3000 | 5      | 0.001 |
| HUMO | 2005 | 188 | 2  | 25     | 33.465   | P         | 0.200   | 0.206  |       |
| YBH  | 2005 | 188 | 2  | 25     | 39.438   | P         | 0.200   | 0.432  |       |
| WDC  | 2005 | 188 | 2  | 25     | 45.802   | P         | 0.200   | -0.014 |       |
| M05C | 2005 | 188 | 2  | 25     | 47.563   | P         | 0.200   | -0.121 |       |
| HATC | 2005 | 188 | 2  | 25     | 49.276   | P         | 0.200   | 0.042  |       |
| M06C | 2005 | 188 | 2  | 25     | 51.303   | P         | 0.200   | 0.003  |       |
| O04C | 2005 | 188 | 2  | 25     | 53.652   | P         | 0.200   | 0.134  |       |
| ORV  | 2005 | 188 | 2  | 25     | 54.774   | P         | 0.200   | -0.982 |       |
| CVS  | 2005 | 188 | 2  | 25     | 57.969   | P         | 0.200   | -0.383 |       |
| Q04C | 2005 | 188 | 2  | 25     | 59.860   | P         | 0.200   | -0.197 |       |
| P05C | 2005 | 188 | 2  | 26     | 0.612    | P         | 0.200   | -0.401 |       |
| LAVA | 2005 | 188 | 2  | 26     | 2.885    | P         | 0.200   | -0.396 |       |
| R04C | 2005 | 188 | 2  | 26     | 4.578    | P         | 0.200   | -0.413 |       |
| S04C | 2005 | 188 | 2  | 26     | 7.460    | P         | 0.200   | -0.155 |       |
| BMN  | 2005 | 188 | 2  | 26     | 8.606    | P         | 0.200   | -0.101 |       |
| CMB  | 2005 | 188 | 2  | 26     | 8.634    | P         | 0.200   | 0.061  |       |
| SN71 | 2005 | 188 | 2  | 26     | 10.342   | P         | 0.200   | -0.222 |       |
| S05C | 2005 | 188 | 2  | 26     | 12.000   | P         | 0.200   | -0.512 |       |
| SN62 | 2005 | 188 | 2  | 26     | 12.257   | P         | 0.200   | -0.408 |       |
| SN67 | 2005 | 188 | 2  | 26     | 12.818   | P         | 0.200   | 0.287  |       |
| T05C | 2005 | 188 | 2  | 26     | 14.099   | P         | 0.200   | 0.529  |       |



|      |      |     |   |    |        |   |       |        |
|------|------|-----|---|----|--------|---|-------|--------|
| SN51 | 2005 | 188 | 2 | 26 | 14.258 | P | 0.200 | 0.177  |
| SN52 | 2005 | 188 | 2 | 26 | 14.308 | P | 0.200 | -0.360 |
| SN53 | 2005 | 188 | 2 | 26 | 14.397 | P | 0.200 | -0.141 |
| SN57 | 2005 | 188 | 2 | 26 | 14.402 | P | 0.200 | 0.483  |
| SN48 | 2005 | 188 | 2 | 26 | 15.855 | P | 0.200 | 0.325  |
| SN42 | 2005 | 188 | 2 | 26 | 16.036 | P | 0.200 | -0.137 |
| T06C | 2005 | 188 | 2 | 26 | 16.706 | P | 0.200 | -0.189 |
| SN38 | 2005 | 188 | 2 | 26 | 17.367 | P | 0.200 | 0.404  |
| SN37 | 2005 | 188 | 2 | 26 | 18.010 | P | 0.200 | 0.536  |
| SN23 | 2005 | 188 | 2 | 26 | 18.571 | P | 0.200 | 0.015  |
| SN28 | 2005 | 188 | 2 | 26 | 19.186 | P | 0.200 | 0.734  |
| PKD  | 2005 | 188 | 2 | 26 | 19.204 | P | 0.200 | -0.063 |
| SN26 | 2005 | 188 | 2 | 26 | 19.566 | P | 0.200 | 0.702  |
| SN11 | 2005 | 188 | 2 | 26 | 19.624 | P | 0.200 | -0.448 |
| V04C | 2005 | 188 | 2 | 26 | 19.858 | P | 0.200 | 0.335  |
| HELL | 2005 | 188 | 2 | 26 | 21.090 | P | 0.200 | -0.444 |
| RCT  | 2005 | 188 | 2 | 26 | 22.133 | P | 0.200 | -0.279 |
| TIN  | 2005 | 188 | 2 | 26 | 23.240 | P | 0.200 | 0.470  |
| SMM  | 2005 | 188 | 2 | 26 | 25.240 | P | 0.200 | 0.306  |
| CWC  | 2005 | 188 | 2 | 26 | 26.855 | P | 0.200 | 0.121  |
| SDP  | 2005 | 188 | 2 | 26 | 26.929 | P | 0.200 | -0.100 |
| GRA  | 2005 | 188 | 2 | 26 | 27.090 | P | 0.200 | 0.767  |
| MPP  | 2005 | 188 | 2 | 26 | 28.435 | P | 0.200 | 0.329  |
| ARV  | 2005 | 188 | 2 | 26 | 29.821 | P | 0.200 | -0.716 |
| FUR  | 2005 | 188 | 2 | 26 | 31.526 | P | 0.200 | 0.482  |
| SCZ2 | 2005 | 188 | 2 | 26 | 33.150 | P | 0.200 | -0.285 |
| LRL  | 2005 | 188 | 2 | 26 | 33.168 | P | 0.200 | -0.219 |
| OSI  | 2005 | 188 | 2 | 26 | 33.869 | P | 0.200 | 0.002  |
| EDW2 | 2005 | 188 | 2 | 26 | 35.216 | P | 0.200 | 0.021  |
| GSC  | 2005 | 188 | 2 | 26 | 37.823 | P | 0.200 | 0.125  |
| BFS  | 2005 | 188 | 2 | 26 | 40.054 | P | 0.200 | -0.079 |
| TUQ  | 2005 | 188 | 2 | 26 | 40.645 | P | 0.200 | 0.161  |
| CIA  | 2005 | 188 | 2 | 26 | 41.203 | P | 0.200 | -0.394 |
| HEC  | 2005 | 188 | 2 | 26 | 42.151 | P | 0.200 | 0.050  |
| BBR  | 2005 | 188 | 2 | 26 | 43.016 | P | 0.200 | -0.085 |

|      |      |     |    |         |          |           |         |        |        |
|------|------|-----|----|---------|----------|-----------|---------|--------|--------|
| 2006 | 114  | 15  | 16 | 36.9415 | 81.98400 | 119.00100 | 10.0000 | 119    | -0.033 |
| M04C | 2006 | 114 | 15 | 25      | 50.985   | P         | 0.200   | 0.195  |        |
| M06C | 2006 | 114 | 15 | 25      | 55.504   | P         | 0.200   | -0.697 |        |
| M07A | 2006 | 114 | 15 | 25      | 56.793   | P         | 0.200   | 0.960  |        |
| N07A | 2006 | 114 | 15 | 26      | 1.135    | P         | 0.200   | 0.625  |        |
| N08A | 2006 | 114 | 15 | 26      | 1.797    | P         | 0.200   | 0.630  |        |
| O04C | 2006 | 114 | 15 | 26      | 2.367    | P         | 0.200   | 0.306  |        |
| BEK  | 2006 | 114 | 15 | 26      | 4.638    | P         | 0.200   | -1.433 |        |
| BMN  | 2006 | 114 | 15 | 26      | 4.753    | P         | 0.200   | 0.319  |        |
| O06A | 2006 | 114 | 15 | 26      | 4.825    | P         | 0.200   | 0.662  |        |
| O07A | 2006 | 114 | 15 | 26      | 5.624    | P         | 0.200   | 0.583  |        |
| O09A | 2006 | 114 | 15 | 26      | 7.112    | P         | 0.200   | 0.847  |        |
| P08A | 2006 | 114 | 15 | 26      | 8.418    | P         | 0.200   | -0.609 |        |
| P05C | 2006 | 114 | 15 | 26      | 9.528    | P         | 0.200   | -0.278 |        |
| WCN  | 2006 | 114 | 15 | 26      | 10.782   | P         | 0.200   | 0.251  |        |
| P09A | 2006 | 114 | 15 | 26      | 11.285   | P         | 0.200   | 0.472  |        |
| LAVA | 2006 | 114 | 15 | 26      | 11.578   | P         | 0.200   | -1.870 |        |
| Q08A | 2006 | 114 | 15 | 26      | 15.388   | P         | 0.200   | 0.229  |        |
| Q09A | 2006 | 114 | 15 | 26      | 16.266   | P         | 0.200   | 0.382  |        |
| CVS  | 2006 | 114 | 15 | 26      | 16.271   | P         | 0.200   | 1.329  |        |
| SN76 | 2006 | 114 | 15 | 26      | 16.567   | P         | 0.200   | -0.945 |        |
| R06C | 2006 | 114 | 15 | 26      | 16.577   | P         | 0.200   | 0.255  |        |
| R08A | 2006 | 114 | 15 | 26      | 17.478   | P         | 0.200   | -1.066 |        |
| SN85 | 2006 | 114 | 15 | 26      | 17.757   | P         | 0.200   | 0.103  |        |
| MNV  | 2006 | 114 | 15 | 26      | 18.098   | P         | 0.200   | 0.197  |        |
| SN48 | 2006 | 114 | 15 | 26      | 18.590   | P         | 0.200   | -1.019 |        |
| SN67 | 2006 | 114 | 15 | 26      | 18.669   | P         | 0.200   | 0.363  |        |

|      |      |     |    |    |        |   |       |        |
|------|------|-----|----|----|--------|---|-------|--------|
| SN57 | 2006 | 114 | 15 | 26 | 19.899 | P | 0.200 | 0.535  |
| SN55 | 2006 | 114 | 15 | 26 | 20.069 | P | 0.200 | -1.024 |
| R07C | 2006 | 114 | 15 | 26 | 20.169 | P | 0.200 | 0.377  |
| SN73 | 2006 | 114 | 15 | 26 | 20.590 | P | 0.200 | -0.027 |
| S06C | 2006 | 114 | 15 | 26 | 20.640 | P | 0.200 | 0.144  |
| SN38 | 2006 | 114 | 15 | 26 | 20.935 | P | 0.200 | 0.400  |
| TPH  | 2006 | 114 | 15 | 26 | 20.954 | P | 0.200 | -0.293 |
| SN62 | 2006 | 114 | 15 | 26 | 20.981 | P | 0.200 | -1.366 |
| SN37 | 2006 | 114 | 15 | 26 | 21.336 | P | 0.200 | -0.746 |
| SN47 | 2006 | 114 | 15 | 26 | 21.341 | P | 0.200 | 0.516  |
| SN71 | 2006 | 114 | 15 | 26 | 21.731 | P | 0.200 | 0.245  |
| SN28 | 2006 | 114 | 15 | 26 | 22.232 | P | 0.200 | 0.579  |
| SN54 | 2006 | 114 | 15 | 26 | 22.288 | P | 0.200 | 0.406  |
| SN53 | 2006 | 114 | 15 | 26 | 23.569 | P | 0.200 | 0.322  |
| SN52 | 2006 | 114 | 15 | 26 | 24.209 | P | 0.200 | 0.078  |
| SN44 | 2006 | 114 | 15 | 26 | 24.279 | P | 0.200 | 0.575  |
| SN25 | 2006 | 114 | 15 | 26 | 24.424 | P | 0.200 | -0.791 |
| SN26 | 2006 | 114 | 15 | 26 | 24.454 | P | 0.200 | 0.782  |
| SN51 | 2006 | 114 | 15 | 26 | 24.843 | P | 0.200 | 0.315  |
| SN16 | 2006 | 114 | 15 | 26 | 24.891 | P | 0.200 | -0.725 |
| S08C | 2006 | 114 | 15 | 26 | 25.262 | P | 0.200 | 0.547  |
| SN15 | 2006 | 114 | 15 | 26 | 25.276 | P | 0.200 | -0.570 |
| SN22 | 2006 | 114 | 15 | 26 | 27.096 | P | 0.200 | 0.144  |
| SN21 | 2006 | 114 | 15 | 26 | 27.603 | P | 0.200 | -0.428 |
| SN11 | 2006 | 114 | 15 | 26 | 28.406 | P | 0.200 | -0.520 |
| GRA  | 2006 | 114 | 15 | 26 | 29.158 | P | 0.200 | 0.761  |
| CWC  | 2006 | 114 | 15 | 26 | 32.475 | P | 0.200 | 0.452  |
| FUR  | 2006 | 114 | 15 | 26 | 32.925 | P | 0.200 | 0.516  |
| SLA  | 2006 | 114 | 15 | 26 | 35.237 | P | 0.200 | -1.149 |
| MPM  | 2006 | 114 | 15 | 26 | 35.476 | P | 0.200 | 0.388  |
| ISA  | 2006 | 114 | 15 | 26 | 36.392 | P | 0.200 | -0.451 |
| SHO  | 2006 | 114 | 15 | 26 | 37.443 | P | 0.200 | 0.513  |
| LRL  | 2006 | 114 | 15 | 26 | 39.014 | P | 0.200 | 0.185  |
| TUQ  | 2006 | 114 | 15 | 26 | 40.595 | P | 0.200 | 0.209  |
| GSC  | 2006 | 114 | 15 | 26 | 40.751 | P | 0.200 | 0.103  |
| MPP  | 2006 | 114 | 15 | 26 | 41.764 | P | 0.200 | 0.528  |
| EDW2 | 2006 | 114 | 15 | 26 | 42.575 | P | 0.200 | 0.032  |
| VCS  | 2006 | 114 | 15 | 26 | 44.090 | P | 0.200 | -1.146 |
| HEC  | 2006 | 114 | 15 | 26 | 44.233 | P | 0.200 | 0.009  |
| MWC  | 2006 | 114 | 15 | 26 | 45.702 | P | 0.200 | -1.521 |
| CHF  | 2006 | 114 | 15 | 26 | 46.681 | P | 0.200 | 0.314  |
| BFS  | 2006 | 114 | 15 | 26 | 47.303 | P | 0.200 | -0.011 |

|      |      |     |   |         |          |            |         |        |       |
|------|------|-----|---|---------|----------|------------|---------|--------|-------|
| 2006 | 316  | 2   | 0 | 22.5118 | 78.72500 | -138.14700 | 10.0000 | 240    | 0.003 |
| L04A | 2006 | 316 | 2 | 7       | 33.185   | P          | 0.200   | -0.071 |       |
| M04C | 2006 | 316 | 2 | 7       | 36.627   | P          | 0.200   | -0.060 |       |
| L07A | 2006 | 316 | 2 | 7       | 36.965   | P          | 0.200   | 0.682  |       |
| M05C | 2006 | 316 | 2 | 7       | 40.540   | P          | 0.200   | -0.133 |       |
| M03C | 2006 | 316 | 2 | 7       | 40.747   | P          | 0.200   | -0.069 |       |
| M07A | 2006 | 316 | 2 | 7       | 42.371   | P          | 0.200   | 0.794  |       |
| M06C | 2006 | 316 | 2 | 7       | 42.838   | P          | 0.200   | 0.450  |       |
| N02C | 2006 | 316 | 2 | 7       | 44.159   | P          | 0.200   | 0.288  |       |
| WDC  | 2006 | 316 | 2 | 7       | 45.587   | P          | 0.200   | -0.559 |       |
| N06A | 2006 | 316 | 2 | 7       | 46.852   | P          | 0.200   | 0.255  |       |
| N07B | 2006 | 316 | 2 | 7       | 47.292   | P          | 0.200   | 0.492  |       |
| N08A | 2006 | 316 | 2 | 7       | 47.737   | P          | 0.200   | 0.324  |       |
| O04C | 2006 | 316 | 2 | 7       | 49.620   | P          | 0.200   | 0.265  |       |
| O02C | 2006 | 316 | 2 | 7       | 49.622   | P          | 0.200   | -0.003 |       |
| SNF9 | 2006 | 316 | 2 | 7       | 50.587   | P          | 0.200   | -0.360 |       |
| BMN  | 2006 | 316 | 2 | 7       | 51.027   | P          | 0.200   | 0.069  |       |
| SNE9 | 2006 | 316 | 2 | 7       | 52.109   | P          | 0.200   | -0.386 |       |
| O06A | 2006 | 316 | 2 | 7       | 51.566   | P          | 0.200   | 0.197  |       |
| O07A | 2006 | 316 | 2 | 7       | 52.249   | P          | 0.200   | 0.171  |       |

|      |      |     |   |   |        |   |       |        |
|------|------|-----|---|---|--------|---|-------|--------|
| O05C | 2006 | 316 | 2 | 7 | 52.347 | P | 0.200 | -0.068 |
| SNG5 | 2006 | 316 | 2 | 7 | 53.365 | P | 0.200 | -0.645 |
| BEK  | 2006 | 316 | 2 | 7 | 53.369 | P | 0.200 | -0.318 |
| O09A | 2006 | 316 | 2 | 7 | 53.520 | P | 0.200 | 0.425  |
| SND7 | 2006 | 316 | 2 | 7 | 55.145 | P | 0.200 | -0.346 |
| SND8 | 2006 | 316 | 2 | 7 | 55.245 | P | 0.200 | -0.208 |
| SNE6 | 2006 | 316 | 2 | 7 | 55.701 | P | 0.200 | -0.881 |
| P06A | 2006 | 316 | 2 | 7 | 55.509 | P | 0.200 | 0.108  |
| SNE4 | 2006 | 316 | 2 | 7 | 57.314 | P | 0.200 | -0.681 |
| SND5 | 2006 | 316 | 2 | 7 | 57.599 | P | 0.200 | -1.070 |
| SNC7 | 2006 | 316 | 2 | 7 | 57.972 | P | 0.200 | -0.265 |
| P07A | 2006 | 316 | 2 | 7 | 57.689 | P | 0.200 | 0.468  |
| P05C | 2006 | 316 | 2 | 7 | 57.691 | P | 0.200 | -0.419 |
| P09A | 2006 | 316 | 2 | 7 | 58.415 | P | 0.200 | 0.114  |
| SNC5 | 2006 | 316 | 2 | 7 | 59.425 | P | 0.200 | -0.697 |
| SND4 | 2006 | 316 | 2 | 7 | 58.608 | P | 0.200 | -1.269 |
| WCN  | 2006 | 316 | 2 | 7 | 58.611 | P | 0.200 | -0.054 |
| SNA8 | 2006 | 316 | 2 | 8 | 0.301  | P | 0.200 | -0.183 |
| SNC4 | 2006 | 316 | 2 | 8 | 0.590  | P | 0.200 | -0.905 |
| SNA7 | 2006 | 316 | 2 | 8 | 1.048  | P | 0.200 | -0.038 |
| SNB5 | 2006 | 316 | 2 | 8 | 1.443  | P | 0.200 | -0.551 |
| Q04C | 2006 | 316 | 2 | 8 | 1.076  | P | 0.200 | -0.197 |
| LAVA | 2006 | 316 | 2 | 8 | 1.629  | P | 0.200 | -0.765 |
| SN97 | 2006 | 316 | 2 | 8 | 2.741  | P | 0.200 | 0.013  |
| SNB3 | 2006 | 316 | 2 | 8 | 3.124  | P | 0.200 | -0.720 |
| SNC3 | 2006 | 316 | 2 | 8 | 3.049  | P | 0.200 | 0.553  |
| R05C | 2006 | 316 | 2 | 8 | 3.301  | P | 0.200 | -0.206 |
| Q08A | 2006 | 316 | 2 | 8 | 3.411  | P | 0.200 | -0.071 |
| SNA3 | 2006 | 316 | 2 | 8 | 4.810  | P | 0.200 | -0.675 |
| Q09A | 2006 | 316 | 2 | 8 | 4.388  | P | 0.200 | 0.211  |
| Q11A | 2006 | 316 | 2 | 8 | 5.129  | P | 0.200 | -0.122 |
| SN96 | 2006 | 316 | 2 | 8 | 5.191  | P | 0.200 | -0.250 |
| R06C | 2006 | 316 | 2 | 8 | 5.461  | P | 0.200 | 0.203  |
| R04C | 2006 | 316 | 2 | 8 | 6.157  | P | 0.200 | -0.060 |
| SN93 | 2006 | 316 | 2 | 8 | 7.253  | P | 0.200 | -0.081 |
| R08A | 2006 | 316 | 2 | 8 | 7.539  | P | 0.200 | 0.047  |
| R09A | 2006 | 316 | 2 | 8 | 8.775  | P | 0.200 | -0.312 |
| S06C | 2006 | 316 | 2 | 8 | 10.063 | P | 0.200 | -0.190 |
| TPH  | 2006 | 316 | 2 | 8 | 10.066 | P | 0.200 | -0.301 |
| S09A | 2006 | 316 | 2 | 8 | 13.020 | P | 0.200 | -0.197 |
| SN43 | 2006 | 316 | 2 | 8 | 14.702 | P | 0.200 | 0.334  |
| S05C | 2006 | 316 | 2 | 8 | 14.045 | P | 0.200 | -0.049 |
| S08C | 2006 | 316 | 2 | 8 | 15.023 | P | 0.200 | 0.444  |
| GRA  | 2006 | 316 | 2 | 8 | 19.028 | P | 0.200 | 0.275  |
| HELL | 2006 | 316 | 2 | 8 | 20.672 | P | 0.200 | 0.269  |
| FUR  | 2006 | 316 | 2 | 8 | 23.632 | P | 0.200 | 0.311  |
| CWC  | 2006 | 316 | 2 | 8 | 23.700 | P | 0.200 | 0.616  |
| MPM  | 2006 | 316 | 2 | 8 | 27.251 | P | 0.200 | 0.773  |
| SLA  | 2006 | 316 | 2 | 8 | 28.725 | P | 0.200 | 0.777  |
| SHO  | 2006 | 316 | 2 | 8 | 28.933 | P | 0.200 | 0.524  |
| V11A | 2006 | 316 | 2 | 8 | 29.811 | P | 0.200 | 0.329  |
| LRL  | 2006 | 316 | 2 | 8 | 31.406 | P | 0.200 | 0.527  |
| TUQ  | 2006 | 316 | 2 | 8 | 32.976 | P | 0.200 | 0.630  |
| GSC  | 2006 | 316 | 2 | 8 | 33.295 | P | 0.200 |        |

|      |      |     |    |         |          |           |         |     |        |
|------|------|-----|----|---------|----------|-----------|---------|-----|--------|
| 2006 | 114  | 17  | 1  | 53.3066 | 81.93200 | 118.83900 | 10.0000 | 120 | -0.017 |
| HUMO | 2006 | 114 | 17 | 11      | 0.551 P  | 0.200     | 0.111   |     |        |

|      |      |     |    |    |       |   |       |       |
|------|------|-----|----|----|-------|---|-------|-------|
| HUMO | 2006 | 114 | 17 | 11 | 0.551 | P | 0.200 | 0.111 |
|------|------|-----|----|----|-------|---|-------|-------|

|      |      |     |    |    |        |   |       |        |
|------|------|-----|----|----|--------|---|-------|--------|
| M02C | 2006 | 114 | 17 | 11 | 9.771  | P | 0.200 | 0.412  |
| M03C | 2006 | 114 | 17 | 11 | 10.708 | P | 0.200 | -0.293 |
| M05C | 2006 | 114 | 17 | 11 | 11.365 | P | 0.200 | 0.130  |
| N02C | 2006 | 114 | 17 | 11 | 13.237 | P | 0.200 | 0.090  |
| M07A | 2006 | 114 | 17 | 11 | 13.396 | P | 0.200 | 0.831  |
| M06C | 2006 | 114 | 17 | 11 | 13.502 | P | 0.200 | 0.573  |
| HATC | 2006 | 114 | 17 | 11 | 14.952 | P | 0.200 | 0.115  |
| WDC  | 2006 | 114 | 17 | 11 | 15.051 | P | 0.200 | -0.387 |
| N07A | 2006 | 114 | 17 | 11 | 17.636 | P | 0.200 | 0.397  |
| N08A | 2006 | 114 | 17 | 11 | 18.351 | P | 0.200 | 0.452  |
| O02C | 2006 | 114 | 17 | 11 | 18.508 | P | 0.200 | 0.101  |
| O04C | 2006 | 114 | 17 | 11 | 19.010 | P | 0.200 | 0.228  |
| O03C | 2006 | 114 | 17 | 11 | 19.646 | P | 0.200 | -0.462 |
| O06A | 2006 | 114 | 17 | 11 | 21.271 | P | 0.200 | 0.383  |
| BMN  | 2006 | 114 | 17 | 11 | 21.307 | P | 0.200 | 0.139  |
| O05C | 2006 | 114 | 17 | 11 | 21.432 | P | 0.200 | -0.040 |
| O07A | 2006 | 114 | 17 | 11 | 22.223 | P | 0.200 | 0.454  |
| BEK  | 2006 | 114 | 17 | 11 | 22.531 | P | 0.200 | -0.262 |
| ORV  | 2006 | 114 | 17 | 11 | 22.825 | P | 0.200 | -1.019 |
| P01C | 2006 | 114 | 17 | 11 | 22.837 | P | 0.200 | -0.002 |
| O09A | 2006 | 114 | 17 | 11 | 23.566 | P | 0.200 | 0.569  |
| SUTB | 2006 | 114 | 17 | 11 | 24.667 | P | 0.200 | -1.211 |
| P05C | 2006 | 114 | 17 | 11 | 26.168 | P | 0.200 | -0.356 |
| WCN  | 2006 | 114 | 17 | 11 | 27.374 | P | 0.200 | 0.122  |
| P09A | 2006 | 114 | 17 | 11 | 27.786 | P | 0.200 | 0.243  |
| MNRC | 2006 | 114 | 17 | 11 | 28.019 | P | 0.200 | 0.100  |
| LAVA | 2006 | 114 | 17 | 11 | 29.615 | P | 0.200 | -0.550 |
| CVS  | 2006 | 114 | 17 | 11 | 31.501 | P | 0.200 | -0.151 |
| Q08A | 2006 | 114 | 17 | 11 | 31.834 | P | 0.200 | -0.050 |
| Q09A | 2006 | 114 | 17 | 11 | 32.814 | P | 0.200 | 0.203  |
| R06C | 2006 | 114 | 17 | 11 | 33.117 | P | 0.200 | 0.076  |
| R04C | 2006 | 114 | 17 | 11 | 33.539 | P | 0.200 | 0.190  |
| SN85 | 2006 | 114 | 17 | 11 | 34.345 | P | 0.200 | -0.025 |
| SN76 | 2006 | 114 | 17 | 11 | 34.456 | P | 0.200 | 0.226  |
| MNV  | 2006 | 114 | 17 | 11 | 34.691 | P | 0.200 | 0.068  |
| BRIB | 2006 | 114 | 17 | 11 | 35.077 | P | 0.200 | 0.273  |
| BRK  | 2006 | 114 | 17 | 11 | 35.206 | P | 0.200 | 0.146  |
| SN67 | 2006 | 114 | 17 | 11 | 35.209 | P | 0.200 | 0.185  |
| BKS  | 2006 | 114 | 17 | 11 | 35.259 | P | 0.200 | 0.245  |
| R08A | 2006 | 114 | 17 | 11 | 35.321 | P | 0.200 | 0.055  |
| CMB  | 2006 | 114 | 17 | 11 | 35.362 | P | 0.200 | -0.192 |
| SN57 | 2006 | 114 | 17 | 11 | 36.489 | P | 0.200 | 0.406  |
| SN48 | 2006 | 114 | 17 | 11 | 36.531 | P | 0.200 | 0.204  |
| R07C | 2006 | 114 | 17 | 11 | 36.709 | P | 0.200 | 0.198  |
| S06C | 2006 | 114 | 17 | 11 | 37.126 | P | 0.200 | -0.086 |
| SN73 | 2006 | 114 | 17 | 11 | 37.225 | P | 0.200 | -0.106 |
| SN38 | 2006 | 114 | 17 | 11 | 37.476 | P | 0.200 | 0.220  |
| TPH  | 2006 | 114 | 17 | 11 | 37.549 | P | 0.200 | -0.422 |
| SN47 | 2006 | 114 | 17 | 11 | 37.881 | P | 0.200 | 0.337  |
| SN55 | 2006 | 114 | 17 | 11 | 38.006 | P | 0.200 | 0.196  |
| SN71 | 2006 | 114 | 17 | 11 | 38.215 | P | 0.200 | 0.016  |
| S04C | 2006 | 114 | 17 | 11 | 38.575 | P | 0.200 | 0.042  |
| SN28 | 2006 | 114 | 17 | 11 | 38.773 | P | 0.200 | 0.400  |
| SN54 | 2006 | 114 | 17 | 11 | 38.824 | P | 0.200 | 0.226  |
| SN62 | 2006 | 114 | 17 | 11 | 38.916 | P | 0.200 | -0.146 |
| SN37 | 2006 | 114 | 17 | 11 | 39.126 | P | 0.200 | 0.324  |
| SN46 | 2006 | 114 | 17 | 11 | 39.328 | P | 0.200 | 0.417  |
| MHC  | 2006 | 114 | 17 | 11 | 39.664 | P | 0.200 | 0.117  |
| S09A | 2006 | 114 | 17 | 11 | 39.863 | P | 0.200 | -0.565 |
| SN53 | 2006 | 114 | 17 | 11 | 40.154 | P | 0.200 | 0.193  |
| MLAC | 2006 | 114 | 17 | 11 | 40.307 | P | 0.200 | 0.463  |
| S05C | 2006 | 114 | 17 | 11 | 40.354 | P | 0.200 | -0.009 |
| SN52 | 2006 | 114 | 17 | 11 | 40.743 | P | 0.200 | -0.101 |

|      |      |     |    |    |        |   |       |        |
|------|------|-----|----|----|--------|---|-------|--------|
| SN26 | 2006 | 114 | 17 | 11 | 40.943 | P | 0.200 | 0.553  |
| SN44 | 2006 | 114 | 17 | 11 | 40.966 | P | 0.200 | 0.546  |
| SN51 | 2006 | 114 | 17 | 11 | 41.476 | P | 0.200 | 0.236  |
| S08C | 2006 | 114 | 17 | 11 | 41.851 | P | 0.200 | 0.418  |
| SN25 | 2006 | 114 | 17 | 11 | 42.311 | P | 0.200 | 0.380  |
| PACP | 2006 | 114 | 17 | 11 | 42.493 | P | 0.200 | 0.499  |
| SN16 | 2006 | 114 | 17 | 11 | 42.830 | P | 0.200 | 0.497  |
| T06C | 2006 | 114 | 17 | 11 | 43.027 | P | 0.200 | -0.278 |
| SN15 | 2006 | 114 | 17 | 11 | 43.113 | P | 0.200 | 0.551  |
| SAO  | 2006 | 114 | 17 | 11 | 43.518 | P | 0.200 | 0.031  |
| SN22 | 2006 | 114 | 17 | 11 | 43.630 | P | 0.200 | -0.035 |
| SN21 | 2006 | 114 | 17 | 11 | 44.186 | P | 0.200 | -0.557 |
| TIN  | 2006 | 114 | 17 | 11 | 44.919 | P | 0.200 | 0.622  |
| SN11 | 2006 | 114 | 17 | 11 | 44.989 | P | 0.200 | -0.649 |
| GRA  | 2006 | 114 | 17 | 11 | 45.648 | P | 0.200 | 0.533  |
| TPNV | 2006 | 114 | 17 | 11 | 45.836 | P | 0.200 | -0.712 |
| HAST | 2006 | 114 | 17 | 11 | 45.998 | P | 0.200 | -0.074 |
| CWC  | 2006 | 114 | 17 | 11 | 48.960 | P | 0.200 | 0.223  |
| FUR  | 2006 | 114 | 17 | 11 | 49.314 | P | 0.200 | 0.187  |
| PKD  | 2006 | 114 | 17 | 11 | 50.041 | P | 0.200 | 0.078  |
| VES  | 2006 | 114 | 17 | 11 | 51.118 | P | 0.200 | -0.658 |
| V04C | 2006 | 114 | 17 | 11 | 51.863 | P | 0.200 | 0.063  |
| MPM  | 2006 | 114 | 17 | 11 | 51.962 | P | 0.200 | 0.157  |
| SLA  | 2006 | 114 | 17 | 11 | 52.823 | P | 0.200 | -0.279 |
| ISA  | 2006 | 114 | 17 | 11 | 52.824 | P | 0.200 | -0.730 |
| PHL  | 2006 | 114 | 17 | 11 | 53.396 | P | 0.200 | -0.222 |
| SHO  | 2006 | 114 | 17 | 11 | 53.881 | P | 0.200 | 0.234  |
| SMM  | 2006 | 114 | 17 | 11 | 54.726 | P | 0.200 | -0.011 |
| LRL  | 2006 | 114 | 17 | 11 | 55.597 | P | 0.200 | 0.056  |
| TUQ  | 2006 | 114 | 17 | 11 | 57.132 | P | 0.200 | 0.029  |
| GSC  | 2006 | 114 | 17 | 11 | 57.235 | P | 0.200 | -0.127 |
| MPP  | 2006 | 114 | 17 | 11 | 58.138 | P | 0.200 | 0.198  |
| EDW2 | 2006 | 114 | 17 | 11 | 59.104 | P | 0.200 | -0.148 |
| OSI  | 2006 | 114 | 17 | 12 | 0.259  | P | 0.200 | -0.339 |
| HEC  | 2006 | 114 | 17 | 12 | 0.867  | P | 0.200 | -0.067 |
| VTV  | 2006 | 114 | 17 | 12 | 1.545  | P | 0.200 | -0.479 |
| VCS  | 2006 | 114 | 17 | 12 | 1.667  | P | 0.200 | -0.274 |
| TOV  | 2006 | 114 | 17 | 12 | 2.550  | P | 0.200 | -0.907 |
| DEC  | 2006 | 114 | 17 | 12 | 3.014  | P | 0.200 | -0.223 |
| CHF  | 2006 | 114 | 17 | 12 | 3.158  | P | 0.200 | 0.084  |
| LGU  | 2006 | 114 | 17 | 12 | 3.185  | P | 0.200 | -0.555 |
| MWC  | 2006 | 114 | 17 | 12 | 3.228  | P | 0.200 | -0.702 |
| PAS  | 2006 | 114 | 17 | 12 | 3.252  | P | 0.200 | -0.774 |
| BFS  | 2006 | 114 | 17 | 12 | 3.830  | P | 0.200 | -0.191 |
| BBR  | 2006 | 114 | 17 | 12 | 4.330  | P | 0.200 | -0.218 |
| SVD  | 2006 | 114 | 17 | 12 | 4.451  | P | 0.200 | -0.853 |
| CIA  | 2006 | 114 | 17 | 12 | 8.456  | P | 0.200 | -0.556 |

|      |      |     |    |         |          |           |         |        |        |
|------|------|-----|----|---------|----------|-----------|---------|--------|--------|
| 2006 | 120  | 0   | 43 | 11.7173 | 44.50400 | 102.38500 | 10.0000 | 122    | -0.014 |
| I03A | 2006 | 120 | 0  | 55      | 36.480   | P         | 0.200   | -0.322 |        |
| HUMO | 2006 | 120 | 0  | 55      | 43.233   | P         | 0.200   | -0.269 |        |
| YBH  | 2006 | 120 | 0  | 55      | 47.216   | P         | 0.200   | -0.461 |        |
| M04C | 2006 | 120 | 0  | 55      | 48.587   | P         | 0.200   | -0.693 |        |
| M02C | 2006 | 120 | 0  | 55      | 48.812   | P         | 0.200   | -0.054 |        |
| N02C | 2006 | 120 | 0  | 55      | 49.994   | P         | 0.200   | -0.456 |        |
| M03C | 2006 | 120 | 0  | 55      | 50.057   | P         | 0.200   | -0.882 |        |
| M05C | 2006 | 120 | 0  | 55      | 51.801   | P         | 0.200   | -0.660 |        |
| WDC  | 2006 | 120 | 0  | 55      | 52.194   | P         | 0.200   | -0.677 |        |
| HATC | 2006 | 120 | 0  | 55      | 53.557   | P         | 0.200   | -0.540 |        |
| M06C | 2006 | 120 | 0  | 55      | 54.085   | P         | 0.200   | -0.213 |        |
| O02C | 2006 | 120 | 0  | 55      | 54.092   | P         | 0.200   | -0.310 |        |
| M07A | 2006 | 120 | 0  | 55      | 55.711   | P         | 0.200   | -0.020 |        |
| ELFS | 2006 | 120 | 0  | 55      | 56.200   | P         | 0.200   | -0.094 |        |

|      |      |     |   |    |        |   |       |        |
|------|------|-----|---|----|--------|---|-------|--------|
| O04C | 2006 | 120 | 0 | 55 | 56.570 | P | 0.200 | -0.393 |
| ORV  | 2006 | 120 | 0 | 55 | 57.999 | P | 0.200 | -1.356 |
| O05C | 2006 | 120 | 0 | 55 | 58.199 | P | 0.200 | -0.498 |
| HOPS | 2006 | 120 | 0 | 55 | 58.439 | P | 0.200 | -0.277 |
| N07B | 2006 | 120 | 0 | 55 | 58.631 | P | 0.200 | -0.122 |
| SUTB | 2006 | 120 | 0 | 55 | 58.834 | P | 0.200 | -1.243 |
| O06A | 2006 | 120 | 0 | 55 | 59.548 | P | 0.200 | -0.250 |
| BEK  | 2006 | 120 | 0 | 55 | 59.613 | P | 0.200 | -0.757 |
| N08A | 2006 | 120 | 0 | 56 | 0.161  | P | 0.200 | -0.071 |
| MNRC | 2006 | 120 | 0 | 56 | 0.566  | P | 0.200 | 0.074  |
| P05C | 2006 | 120 | 0 | 56 | 1.577  | P | 0.200 | -0.549 |
| O07A | 2006 | 120 | 0 | 56 | 1.621  | P | 0.200 | 0.077  |
| O08A | 2006 | 120 | 0 | 56 | 2.306  | P | 0.200 | 0.055  |
| Q04C | 2006 | 120 | 0 | 56 | 2.307  | P | 0.200 | -0.058 |
| Q03C | 2006 | 120 | 0 | 56 | 2.682  | P | 0.200 | 0.591  |
| BMN  | 2006 | 120 | 0 | 56 | 3.264  | P | 0.200 | 0.034  |
| LAVA | 2006 | 120 | 0 | 56 | 3.509  | P | 0.200 | -0.540 |
| WCN  | 2006 | 120 | 0 | 56 | 3.692  | P | 0.200 | 0.027  |
| P07A | 2006 | 120 | 0 | 56 | 4.305  | P | 0.200 | 0.077  |
| O09A | 2006 | 120 | 0 | 56 | 4.569  | P | 0.200 | 0.332  |
| R04C | 2006 | 120 | 0 | 56 | 5.256  | P | 0.200 | -0.218 |
| P08A | 2006 | 120 | 0 | 56 | 5.384  | P | 0.200 | 0.534  |
| P09A | 2006 | 120 | 0 | 56 | 6.949  | P | 0.200 | -0.137 |
| SN85 | 2006 | 120 | 0 | 56 | 7.553  | P | 0.200 | -0.044 |
| R06C | 2006 | 120 | 0 | 56 | 7.707  | P | 0.200 | 0.253  |
| S04C | 2006 | 120 | 0 | 56 | 7.974  | P | 0.200 | -0.171 |
| MHC  | 2006 | 120 | 0 | 56 | 8.310  | P | 0.200 | 0.001  |
| SN76 | 2006 | 120 | 0 | 56 | 8.411  | P | 0.200 | 0.331  |
| Q08A | 2006 | 120 | 0 | 56 | 8.464  | P | 0.200 | -0.250 |
| SN71 | 2006 | 120 | 0 | 56 | 8.691  | P | 0.200 | -0.430 |
| SN73 | 2006 | 120 | 0 | 56 | 8.821  | P | 0.200 | -0.203 |
| S06C | 2006 | 120 | 0 | 56 | 9.248  | P | 0.200 | -0.082 |
| SN67 | 2006 | 120 | 0 | 56 | 9.427  | P | 0.200 | 0.453  |
| SN62 | 2006 | 120 | 0 | 56 | 9.827  | P | 0.200 | -0.360 |
| Q09A | 2006 | 120 | 0 | 56 | 10.079 | P | 0.200 | 0.154  |
| S05C | 2006 | 120 | 0 | 56 | 10.087 | P | 0.200 | -0.371 |
| SN57 | 2006 | 120 | 0 | 56 | 10.417 | P | 0.200 | 0.638  |
| PACP | 2006 | 120 | 0 | 56 | 10.425 | P | 0.200 | 0.282  |
| R07C | 2006 | 120 | 0 | 56 | 10.552 | P | 0.200 | 0.463  |
| R08A | 2006 | 120 | 0 | 56 | 10.594 | P | 0.200 | 0.256  |
| SAO  | 2006 | 120 | 0 | 56 | 10.722 | P | 0.200 | -0.063 |
| SN55 | 2006 | 120 | 0 | 56 | 10.767 | P | 0.200 | 0.358  |
| SN54 | 2006 | 120 | 0 | 56 | 10.843 | P | 0.200 | 0.153  |
| SN48 | 2006 | 120 | 0 | 56 | 10.915 | P | 0.200 | 0.364  |
| SN53 | 2006 | 120 | 0 | 56 | 11.068 | P | 0.200 | -0.189 |
| SN52 | 2006 | 120 | 0 | 56 | 11.072 | P | 0.200 | -0.346 |
| SN51 | 2006 | 120 | 0 | 56 | 11.405 | P | 0.200 | 0.111  |
| SN47 | 2006 | 120 | 0 | 56 | 11.603 | P | 0.200 | 0.498  |
| SN38 | 2006 | 120 | 0 | 56 | 11.756 | P | 0.200 | 0.476  |
| HAST | 2006 | 120 | 0 | 56 | 12.002 | P | 0.200 | -0.189 |
| SN46 | 2006 | 120 | 0 | 56 | 12.115 | P | 0.200 | 0.444  |
| T05C | 2006 | 120 | 0 | 56 | 12.256 | P | 0.200 | 0.527  |
| SN44 | 2006 | 120 | 0 | 56 | 12.271 | P | 0.200 | 0.288  |
| SN37 | 2006 | 120 | 0 | 56 | 12.444 | P | 0.200 | 0.468  |
| T06C | 2006 | 120 | 0 | 56 | 12.735 | P | 0.200 | -0.303 |
| SN28 | 2006 | 120 | 0 | 56 | 12.781 | P | 0.200 | 0.640  |
| TPH  | 2006 | 120 | 0 | 56 | 13.119 | P | 0.200 | -0.033 |
| SN26 | 2006 | 120 | 0 | 56 | 13.555 | P | 0.200 | 0.659  |
| SN22 | 2006 | 120 | 0 | 56 | 13.589 | P | 0.200 | -0.161 |
| SN21 | 2006 | 120 | 0 | 56 | 13.648 | P | 0.200 | -0.478 |
| SN23 | 2006 | 120 | 0 | 56 | 13.733 | P | 0.200 | -0.004 |
| SN25 | 2006 | 120 | 0 | 56 | 14.054 | P | 0.200 | 0.414  |
| U04C | 2006 | 120 | 0 | 56 | 14.225 | P | 0.200 | 0.551  |

|      |      |     |   |    |        |   |       |        |
|------|------|-----|---|----|--------|---|-------|--------|
| SN11 | 2006 | 120 | 0 | 56 | 14.349 | P | 0.200 | -0.475 |
| SN15 | 2006 | 120 | 0 | 56 | 14.621 | P | 0.200 | 0.471  |
| S08C | 2006 | 120 | 0 | 56 | 14.747 | P | 0.200 | 0.699  |
| S09A | 2006 | 120 | 0 | 56 | 14.770 | P | 0.200 | 0.217  |
| SN16 | 2006 | 120 | 0 | 56 | 15.068 | P | 0.200 | 0.624  |
| U05C | 2006 | 120 | 0 | 56 | 15.489 | P | 0.200 | 0.678  |
| PKD  | 2006 | 120 | 0 | 56 | 15.912 | P | 0.200 | 0.058  |
| RCT  | 2006 | 120 | 0 | 56 | 16.181 | P | 0.200 | -0.364 |
| TIN  | 2006 | 120 | 0 | 56 | 16.230 | P | 0.200 | 0.598  |
| V04C | 2006 | 120 | 0 | 56 | 16.863 | P | 0.200 | 0.483  |
| V05C | 2006 | 120 | 0 | 56 | 17.691 | P | 0.200 | 0.521  |
| GRA  | 2006 | 120 | 0 | 56 | 17.893 | P | 0.200 | 0.846  |
| VES  | 2006 | 120 | 0 | 56 | 17.959 | P | 0.200 | -0.894 |
| CWC  | 2006 | 120 | 0 | 56 | 18.564 | P | 0.200 | 0.117  |
| TPNV | 2006 | 120 | 0 | 56 | 19.402 | P | 0.200 | 0.005  |
| SMM  | 2006 | 120 | 0 | 56 | 19.667 | P | 0.200 | 0.272  |
| ISA  | 2006 | 120 | 0 | 56 | 19.962 | P | 0.200 | -0.690 |
| FUR  | 2006 | 120 | 0 | 56 | 20.624 | P | 0.200 | 0.649  |
| MPM  | 2006 | 120 | 0 | 56 | 21.397 | P | 0.200 | 0.368  |
| SDP  | 2006 | 120 | 0 | 56 | 21.470 | P | 0.200 | -0.154 |
| ARV  | 2006 | 120 | 0 | 56 | 21.570 | P | 0.200 | -0.570 |
| MPP  | 2006 | 120 | 0 | 56 | 22.073 | P | 0.200 | 0.507  |
| LRL  | 2006 | 120 | 0 | 56 | 23.139 | P | 0.200 | 0.201  |
| SHO  | 2006 | 120 | 0 | 56 | 23.796 | P | 0.200 | 0.301  |
| OSI  | 2006 | 120 | 0 | 56 | 24.794 | P | 0.200 | 0.184  |
| EDW2 | 2006 | 120 | 0 | 56 | 24.944 | P | 0.200 | 0.283  |
| SCZ2 | 2006 | 120 | 0 | 56 | 25.212 | P | 0.200 | -0.067 |
| GSC  | 2006 | 120 | 0 | 56 | 25.416 | P | 0.200 | 0.298  |
| LGU  | 2006 | 120 | 0 | 56 | 25.587 | P | 0.200 | -0.490 |
| DEC  | 2006 | 120 | 0 | 56 | 26.403 | P | 0.200 | -0.295 |
| TUQ  | 2006 | 120 | 0 | 56 | 26.443 | P | 0.200 | 0.423  |
| RRX  | 2006 | 120 | 0 | 56 | 26.941 | P | 0.200 | 0.522  |
| CHF  | 2006 | 120 | 0 | 56 | 27.021 | P | 0.200 | 0.049  |
| BFS  | 2006 | 120 | 0 | 56 | 27.800 | P | 0.200 | -0.257 |
| HEC  | 2006 | 120 | 0 | 56 | 28.151 | P | 0.200 | 0.269  |
| SNCC | 2006 | 120 | 0 | 56 | 28.532 | P | 0.200 | -0.173 |

|      |      |     |    |         |          |           |        |        |        |
|------|------|-----|----|---------|----------|-----------|--------|--------|--------|
| 2005 | 314  | 19  | 29 | 54.6759 | 57.47000 | 120.58600 | 6.0000 | 34     | -0.006 |
| TAKO | 2005 | 314 | 19 | 40      | 39.577   | P         | 0.200  | 0.340  |        |
| DBO  | 2005 | 314 | 19 | 40      | 45.379   | P         | 0.200  | 0.486  |        |
| HUMO | 2005 | 314 | 19 | 40      | 48.876   | P         | 0.200  | 0.574  |        |
| YBH  | 2005 | 314 | 19 | 40      | 54.375   | P         | 0.200  | 0.806  |        |
| M04C | 2005 | 314 | 19 | 40      | 55.622   | P         | 0.200  | 0.052  |        |
| M02C | 2005 | 314 | 19 | 40      | 55.807   | P         | 0.200  | 0.767  |        |
| JCC  | 2005 | 314 | 19 | 40      | 55.982   | P         | 0.200  | 0.830  |        |
| N02C | 2005 | 314 | 19 | 40      | 57.308   | P         | 0.200  | 0.326  |        |
| M03C | 2005 | 314 | 19 | 40      | 57.379   | P         | 0.200  | -0.248 |        |
| M05C | 2005 | 314 | 19 | 40      | 59.373   | P         | 0.200  | -0.204 |        |
| WDC  | 2005 | 314 | 19 | 40      | 59.986   | P         | 0.200  | -0.102 |        |
| HATC | 2005 | 314 | 19 | 41      | 1.486    | P         | 0.200  | -0.169 |        |
| M06C | 2005 | 314 | 19 | 41      | 2.093    | P         | 0.200  | 0.092  |        |
| O03C | 2005 | 314 | 19 | 41      | 3.887    | P         | 0.200  | -0.599 |        |
| P01C | 2005 | 314 | 19 | 41      | 4.402    | P         | 0.200  | 0.325  |        |
| ELFS | 2005 | 314 | 19 | 41      | 4.645    | P         | 0.200  | 0.186  |        |
| GASB | 2005 | 314 | 19 | 41      | 5.194    | P         | 0.200  | 0.363  |        |
| O04C | 2005 | 314 | 19 | 41      | 5.288    | P         | 0.200  | 0.040  |        |
| O05C | 2005 | 314 | 19 | 41      | 7.348    | P         | 0.200  | -0.135 |        |
| ORV  | 2005 | 314 | 19 | 41      | 7.572    | P         | 0.200  | -0.640 |        |
| HOPS | 2005 | 314 | 19 | 41      | 7.575    | P         | 0.200  | 0.228  |        |
| SUTB | 2005 | 314 | 19 | 41      | 8.110    | P         | 0.200  | -1.074 |        |
| MNRC | 2005 | 314 | 19 | 41      | 9.922    | P         | 0.200  | 0.332  |        |
| P05C | 2005 | 314 | 19 | 41      | 11.532   | P         | 0.200  | -0.292 |        |
| CVS  | 2005 | 314 | 19 | 41      | 12.044   | P         | 0.200  | -0.231 |        |

|      |      |     |    |    |        |   |       |        |
|------|------|-----|----|----|--------|---|-------|--------|
| Q04C | 2005 | 314 | 19 | 41 | 12.103 | P | 0.200 | -0.050 |
| Q03C | 2005 | 314 | 19 | 41 | 12.305 | P | 0.200 | 0.577  |
| FARB | 2005 | 314 | 19 | 41 | 13.514 | P | 0.200 | -0.634 |
| LAVA | 2005 | 314 | 19 | 41 | 13.811 | P | 0.200 | -0.452 |
| BRK  | 2005 | 314 | 19 | 41 | 14.998 | P | 0.200 | -0.170 |
| BKS  | 2005 | 314 | 19 | 41 | 15.246 | P | 0.200 | 0.109  |
| BRIB | 2005 | 314 | 19 | 41 | 15.275 | P | 0.200 | 0.200  |
| BDM  | 2005 | 314 | 19 | 41 | 15.882 | P | 0.200 | 0.211  |
| R05C | 2005 | 314 | 19 | 41 | 16.300 | P | 0.200 | -0.014 |
| R04C | 2005 | 314 | 19 | 41 | 16.364 | P | 0.200 | 0.166  |
| SN95 | 2005 | 314 | 19 | 41 | 17.628 | P | 0.200 | -0.080 |
| WENL | 2005 | 314 | 19 | 41 | 17.778 | P | 0.200 | 0.097  |
| SN86 | 2005 | 314 | 19 | 41 | 18.232 | P | 0.200 | 0.074  |
| SN84 | 2005 | 314 | 19 | 41 | 18.654 | P | 0.200 | -0.329 |
| SN85 | 2005 | 314 | 19 | 41 | 18.830 | P | 0.200 | 0.033  |
| BNLO | 2005 | 314 | 19 | 41 | 18.835 | P | 0.200 | -0.410 |
| R06C | 2005 | 314 | 19 | 41 | 18.851 | P | 0.200 | 0.191  |
| CMB  | 2005 | 314 | 19 | 41 | 18.878 | P | 0.200 | 0.080  |
| S04C | 2005 | 314 | 19 | 41 | 19.516 | P | 0.200 | 0.081  |
| MHC  | 2005 | 314 | 19 | 41 | 19.565 | P | 0.200 | -0.069 |
| SN76 | 2005 | 314 | 19 | 41 | 19.750 | P | 0.200 | 0.287  |
| SN74 | 2005 | 314 | 19 | 41 | 20.149 | P | 0.200 | -0.150 |
| SN73 | 2005 | 314 | 19 | 41 | 20.376 | P | 0.200 | -0.282 |
| SN71 | 2005 | 314 | 19 | 41 | 20.488 | P | 0.200 | -0.260 |
| S06C | 2005 | 314 | 19 | 41 | 20.934 | P | 0.200 | -0.123 |
| SN67 | 2005 | 314 | 19 | 41 | 20.959 | P | 0.200 | 0.307  |
| SN66 | 2005 | 314 | 19 | 41 | 21.001 | P | 0.200 | 0.118  |
| SN62 | 2005 | 314 | 19 | 41 | 21.752 | P | 0.200 | -0.397 |
| SN64 | 2005 | 314 | 19 | 41 | 21.990 | P | 0.200 | 0.228  |
| S05C | 2005 | 314 | 19 | 41 | 22.053 | P | 0.200 | -0.446 |
| MNV  | 2005 | 314 | 19 | 41 | 22.093 | P | 0.200 | 0.074  |
| SN57 | 2005 | 314 | 19 | 41 | 22.155 | P | 0.200 | 0.460  |
| PACP | 2005 | 314 | 19 | 41 | 22.198 | P | 0.200 | 0.157  |
| R07C | 2005 | 314 | 19 | 41 | 22.255 | P | 0.200 | 0.268  |
| SN55 | 2005 | 314 | 19 | 41 | 22.592 | P | 0.200 | 0.175  |
| SN56 | 2005 | 314 | 19 | 41 | 22.675 | P | 0.200 | 0.311  |
| SAO  | 2005 | 314 | 19 | 41 | 22.781 | P | 0.200 | -0.076 |
| SN48 | 2005 | 314 | 19 | 41 | 22.803 | P | 0.200 | 0.149  |
| SN54 | 2005 | 314 | 19 | 41 | 22.876 | P | 0.200 | 0.144  |
| SN53 | 2005 | 314 | 19 | 41 | 23.157 | P | 0.200 | -0.290 |
| SN52 | 2005 | 314 | 19 | 41 | 23.372 | P | 0.200 | -0.371 |
| SN51 | 2005 | 314 | 19 | 41 | 23.422 | P | 0.200 | -0.146 |
| SN47 | 2005 | 314 | 19 | 41 | 23.553 | P | 0.200 | 0.264  |
| SN38 | 2005 | 314 | 19 | 41 | 23.987 | P | 0.200 | 0.337  |
| HAST | 2005 | 314 | 19 | 41 | 24.373 | P | 0.200 | -0.212 |
| SN46 | 2005 | 314 | 19 | 41 | 24.384 | P | 0.200 | 0.387  |
| SN45 | 2005 | 314 | 19 | 41 | 24.394 | P | 0.200 | 0.447  |
| SN43 | 2005 | 314 | 19 | 41 | 24.472 | P | 0.200 | 0.001  |
| SN44 | 2005 | 314 | 19 | 41 | 24.692 | P | 0.200 | 0.288  |
| SN37 | 2005 | 314 | 19 | 41 | 24.773 | P | 0.200 | 0.294  |
| SN28 | 2005 | 314 | 19 | 41 | 25.089 | P | 0.200 | 0.330  |
| SN36 | 2005 | 314 | 19 | 41 | 25.339 | P | 0.200 | 0.467  |
| T06C | 2005 | 314 | 19 | 41 | 25.410 | P | 0.200 | -0.369 |
| TPH  | 2005 | 314 | 19 | 41 | 25.754 | P | 0.200 | -0.344 |
| SN34 | 2005 | 314 | 19 | 41 | 25.758 | P | 0.200 | 0.113  |
| SN26 | 2005 | 314 | 19 | 41 | 26.181 | P | 0.200 | 0.492  |
| SN22 | 2005 | 314 | 19 | 41 | 26.347 | P | 0.200 | -0.323 |
| SN23 | 2005 | 314 | 19 | 41 | 26.398 | P | 0.200 | -0.215 |
| SN25 | 2005 | 314 | 19 | 41 | 26.891 | P | 0.200 | 0.345  |
| U04C | 2005 | 314 | 19 | 41 | 26.930 | P | 0.200 | 0.374  |
| V03C | 2005 | 314 | 19 | 41 | 27.217 | P | 0.200 | 0.091  |
| S08C | 2005 | 314 | 19 | 41 | 27.475 | P | 0.200 | 0.382  |
| SN11 | 2005 | 314 | 19 | 41 | 27.568 | P | 0.200 | -0.562 |



|      |      |     |    |    |        |   |       |        |
|------|------|-----|----|----|--------|---|-------|--------|
| SN15 | 2005 | 314 | 19 | 41 | 27.602 | P | 0.200 | 0.432  |
| HELL | 2005 | 314 | 19 | 41 | 28.680 | P | 0.200 | -0.414 |
| PKD  | 2005 | 314 | 19 | 41 | 29.044 | P | 0.200 | -0.204 |
| TIN  | 2005 | 314 | 19 | 41 | 29.350 | P | 0.200 | 0.257  |
| RCT  | 2005 | 314 | 19 | 41 | 29.705 | P | 0.200 | -0.557 |
| V04C | 2005 | 314 | 19 | 41 | 30.108 | P | 0.200 | 0.147  |
| RAMR | 2005 | 314 | 19 | 41 | 30.109 | P | 0.200 | 0.151  |
| V05C | 2005 | 314 | 19 | 41 | 31.286 | P | 0.200 | 0.281  |
| GRA  | 2005 | 314 | 19 | 41 | 31.588 | P | 0.200 | 0.537  |
| VES  | 2005 | 314 | 19 | 41 | 32.052 | P | 0.200 | -1.036 |
| CWC  | 2005 | 314 | 19 | 41 | 32.657 | P | 0.200 | 0.023  |
| TPNV | 2005 | 314 | 19 | 41 | 33.843 | P | 0.200 | -0.186 |
| SMM  | 2005 | 314 | 19 | 41 | 33.845 | P | 0.200 | 0.092  |
| ISA  | 2005 | 314 | 19 | 41 | 34.701 | P | 0.200 | -0.717 |
| FUR  | 2005 | 314 | 19 | 41 | 35.078 | P | 0.200 | 0.293  |
| MPM  | 2005 | 314 | 19 | 41 | 36.040 | P | 0.200 | 0.172  |
| SDP  | 2005 | 314 | 19 | 41 | 36.174 | P | 0.200 | -0.310 |
| MPP  | 2005 | 314 | 19 | 41 | 36.732 | P | 0.200 | 0.268  |
| LRL  | 2005 | 314 | 19 | 41 | 38.064 | P | 0.200 | -0.221 |
| SBC  | 2005 | 314 | 19 | 41 | 38.877 | P | 0.200 | 0.021  |
| SHO  | 2005 | 314 | 19 | 41 | 39.271 | P | 0.200 | 0.104  |
| OSI  | 2005 | 314 | 19 | 41 | 40.212 | P | 0.200 | -0.083 |
| EDW2 | 2005 | 314 | 19 | 41 | 40.455 | P | 0.200 | 0.013  |
| SCZ2 | 2005 | 314 | 19 | 41 | 40.706 | P | 0.200 | -0.445 |
| GSC  | 2005 | 314 | 19 | 41 | 41.105 | P | 0.200 | 0.055  |
| LGU  | 2005 | 314 | 19 | 41 | 41.438 | P | 0.200 | -0.637 |
| TUQ  | 2005 | 314 | 19 | 41 | 42.444 | P | 0.200 | 0.141  |
| DEC  | 2005 | 314 | 19 | 41 | 42.511 | P | 0.200 | -0.386 |
| RRX  | 2005 | 314 | 19 | 41 | 42.796 | P | 0.200 | 0.105  |
| BFS  | 2005 | 314 | 19 | 41 | 44.343 | P | 0.200 | -0.253 |
| HEC  | 2005 | 314 | 19 | 41 | 44.423 | P | 0.200 | -0.057 |
| SNCC | 2005 | 314 | 19 | 41 | 44.755 | P | 0.200 | -0.535 |
| FMP  | 2005 | 314 | 19 | 41 | 45.165 | P | 0.200 | -0.368 |
| BBR  | 2005 | 314 | 19 | 41 | 45.951 | P | 0.200 | -0.359 |
| CIA  | 2005 | 314 | 19 | 41 | 46.349 | P | 0.200 | -0.714 |

|      |      |    |    |         |          |            |         |        |       |
|------|------|----|----|---------|----------|------------|---------|--------|-------|
| 2007 | 5    | 16 | 52 | 23.1804 | 55.75500 | -156.06100 | 18.6000 | 301    | 0.011 |
| K04A | 2007 | 5  | 16 | 57      | 52.266   | P          | 0.200   | 0.375  |       |
| YBH  | 2007 | 5  | 16 | 57      | 53.367   | P          | 0.200   | 0.804  |       |
| L04A | 2007 | 5  | 16 | 57      | 54.050   | P          | 0.200   | 0.251  |       |
| M02C | 2007 | 5  | 16 | 57      | 54.896   | P          | 0.200   | 0.888  |       |
| K05A | 2007 | 5  | 16 | 57      | 56.186   | P          | 0.200   | 0.787  |       |
| M04C | 2007 | 5  | 16 | 57      | 56.809   | P          | 0.200   | 0.270  |       |
| M03C | 2007 | 5  | 16 | 57      | 58.416   | P          | 0.200   | 0.022  |       |
| M05C | 2007 | 5  | 16 | 58      | 2.681    | P          | 0.200   | 0.070  |       |
| HATC | 2007 | 5  | 16 | 58      | 4.663    | P          | 0.200   | 0.177  |       |
| GASB | 2007 | 5  | 16 | 58      | 6.573    | P          | 0.200   | 0.484  |       |
| M06C | 2007 | 5  | 16 | 58      | 7.182    | P          | 0.200   | 0.353  |       |
| L07A | 2007 | 5  | 16 | 58      | 7.917    | P          | 0.200   | 0.501  |       |
| ELFS | 2007 | 5  | 16 | 58      | 9.633    | P          | 0.200   | 0.374  |       |
| O04C | 2007 | 5  | 16 | 58      | 9.682    | P          | 0.200   | 0.170  |       |
| SNG7 | 2007 | 5  | 16 | 58      | 10.476   | P          | 0.200   | 0.026  |       |
| ORV  | 2007 | 5  | 16 | 58      | 11.530   | P          | 0.200   | -0.777 |       |
| M07A | 2007 | 5  | 16 | 58      | 12.306   | P          | 0.200   | 0.296  |       |
| O05C | 2007 | 5  | 16 | 58      | 12.735   | P          | 0.200   | 0.213  |       |
| N06A | 2007 | 5  | 16 | 58      | 12.942   | P          | 0.200   | 0.153  |       |
| SNF6 | 2007 | 5  | 16 | 58      | 13.077   | P          | 0.200   | -0.488 |       |
| SNF8 | 2007 | 5  | 16 | 58      | 13.628   | P          | 0.200   | -0.100 |       |
| BEK  | 2007 | 5  | 16 | 58      | 15.647   | P          | 0.200   | -0.294 |       |
| SNE9 | 2007 | 5  | 16 | 58      | 15.695   | P          | 0.200   | -0.053 |       |
| SNE6 | 2007 | 5  | 16 | 58      | 16.505   | P          | 0.200   | 0.429  |       |
| O06A | 2007 | 5  | 16 | 58      | 16.616   | P          | 0.200   | 0.136  |       |
| SND4 | 2007 | 5  | 16 | 58      | 16.716   | P          | 0.200   | -0.562 |       |

|      |      |   |    |    |        |   |       |        |
|------|------|---|----|----|--------|---|-------|--------|
| N07B | 2007 | 5 | 16 | 58 | 16.949 | P | 0.200 | 0.215  |
| Q04C | 2007 | 5 | 16 | 58 | 16.956 | P | 0.200 | -0.556 |
| SND5 | 2007 | 5 | 16 | 58 | 17.055 | P | 0.200 | -0.373 |
| SND8 | 2007 | 5 | 16 | 58 | 17.574 | P | 0.200 | -0.348 |
| P05C | 2007 | 5 | 16 | 58 | 17.966 | P | 0.200 | -0.415 |
| SNC5 | 2007 | 5 | 16 | 58 | 18.826 | P | 0.200 | -0.470 |
| SNC7 | 2007 | 5 | 16 | 58 | 18.922 | P | 0.200 | -0.437 |
| SNC4 | 2007 | 5 | 16 | 58 | 18.933 | P | 0.200 | -0.643 |
| SNC8 | 2007 | 5 | 16 | 58 | 19.939 | P | 0.200 | -0.150 |
| SNC6 | 2007 | 5 | 16 | 58 | 20.175 | P | 0.200 | -0.299 |
| LAVA | 2007 | 5 | 16 | 58 | 20.578 | P | 0.200 | -0.586 |
| N08A | 2007 | 5 | 16 | 58 | 20.878 | P | 0.200 | 0.105  |
| SNB3 | 2007 | 5 | 16 | 58 | 21.079 | P | 0.200 | -0.155 |
| SNB5 | 2007 | 5 | 16 | 58 | 21.168 | P | 0.200 | -0.476 |
| O07A | 2007 | 5 | 16 | 58 | 21.278 | P | 0.200 | 0.201  |
| WCN  | 2007 | 5 | 16 | 58 | 22.384 | P | 0.200 | -0.048 |
| SNB9 | 2007 | 5 | 16 | 58 | 22.940 | P | 0.200 | 0.099  |
| SNA3 | 2007 | 5 | 16 | 58 | 23.676 | P | 0.200 | -0.055 |
| SNA5 | 2007 | 5 | 16 | 58 | 23.703 | P | 0.200 | -0.367 |
| SNA7 | 2007 | 5 | 16 | 58 | 23.782 | P | 0.200 | 0.065  |
| O08A | 2007 | 5 | 16 | 58 | 23.931 | P | 0.200 | 0.130  |
| SNA8 | 2007 | 5 | 16 | 58 | 24.489 | P | 0.200 | -0.034 |
| R05C | 2007 | 5 | 16 | 58 | 24.824 | P | 0.200 | -0.073 |
| P07A | 2007 | 5 | 16 | 58 | 24.963 | P | 0.200 | -0.005 |
| SN97 | 2007 | 5 | 16 | 58 | 25.395 | P | 0.200 | -0.028 |
| SN93 | 2007 | 5 | 16 | 58 | 25.830 | P | 0.200 | 0.135  |
| SN95 | 2007 | 5 | 16 | 58 | 26.072 | P | 0.200 | -0.307 |
| CMB  | 2007 | 5 | 16 | 58 | 27.422 | P | 0.200 | -0.116 |
| SN86 | 2007 | 5 | 16 | 58 | 27.704 | P | 0.200 | 0.092  |
| SN85 | 2007 | 5 | 16 | 58 | 28.020 | P | 0.200 | -0.163 |
| R06C | 2007 | 5 | 16 | 58 | 29.174 | P | 0.200 | 0.245  |
| Q07A | 2007 | 5 | 16 | 58 | 29.255 | P | 0.200 | 0.134  |
| O09A | 2007 | 5 | 16 | 58 | 29.372 | P | 0.200 | 0.264  |
| SN75 | 2007 | 5 | 16 | 58 | 30.522 | P | 0.200 | 0.009  |
| S06C | 2007 | 5 | 16 | 58 | 31.076 | P | 0.200 | -0.155 |
| S05C | 2007 | 5 | 16 | 58 | 31.716 | P | 0.200 | -0.639 |
| P09A | 2007 | 5 | 16 | 58 | 33.481 | P | 0.200 | 0.185  |
| R07C | 2007 | 5 | 16 | 58 | 33.796 | P | 0.200 | 0.102  |
| Q08A | 2007 | 5 | 16 | 58 | 33.897 | P | 0.200 | 0.019  |
| P10A | 2007 | 5 | 16 | 58 | 36.236 | P | 0.200 | 0.068  |
| SN43 | 2007 | 5 | 16 | 58 | 36.266 | P | 0.200 | 0.123  |
| R08A | 2007 | 5 | 16 | 58 | 36.515 | P | 0.200 | 0.223  |
| T06C | 2007 | 5 | 16 | 58 | 37.233 | P | 0.200 | -0.266 |
| Q09A | 2007 | 5 | 16 | 58 | 37.973 | P | 0.200 | 0.370  |
| MLAC | 2007 | 5 | 16 | 58 | 38.438 | P | 0.200 | 0.750  |
| SN34 | 2007 | 5 | 16 | 58 | 38.563 | P | 0.200 | 0.354  |
| R09A | 2007 | 5 | 16 | 58 | 41.795 | P | 0.200 | -0.178 |
| TPH  | 2007 | 5 | 16 | 58 | 42.095 | P | 0.200 | -0.262 |
| S08C | 2007 | 5 | 16 | 58 | 42.243 | P | 0.200 | 0.470  |
| HELL | 2007 | 5 | 16 | 58 | 42.517 | P | 0.200 | -0.436 |
| S09A | 2007 | 5 | 16 | 58 | 44.403 | P | 0.200 | -0.182 |
| V05C | 2007 | 5 | 16 | 58 | 44.878 | P | 0.200 | 0.713  |
| Q11A | 2007 | 5 | 16 | 58 | 44.921 | P | 0.200 | 0.055  |
| R10A | 2007 | 5 | 16 | 58 | 45.372 | P | 0.200 | 0.089  |
| VES  | 2007 | 5 | 16 | 58 | 47.512 | P | 0.200 | -0.562 |
| SMM  | 2007 | 5 | 16 | 58 | 47.771 | P | 0.200 | 0.142  |
| GRA  | 2007 | 5 | 16 | 58 | 48.938 | P | 0.200 | 0.515  |
| CWC  | 2007 | 5 | 16 | 58 | 49.152 | P | 0.200 | 0.170  |
| ISA  | 2007 | 5 | 16 | 58 | 51.689 | P | 0.200 | -0.448 |
| MPM  | 2007 | 5 | 16 | 58 | 54.257 | P | 0.200 | 0.060  |
| FUR  | 2007 | 5 | 16 | 58 | 54.396 | P | 0.200 | 0.255  |
| SLA  | 2007 | 5 | 16 | 58 | 56.160 | P | 0.200 | -0.067 |
| LRL  | 2007 | 5 | 16 | 58 | 56.675 | P | 0.200 | -0.460 |

|      |      |   |    |    |        |   |       |        |
|------|------|---|----|----|--------|---|-------|--------|
| U10A | 2007 | 5 | 16 | 58 | 57.181 | P | 0.200 | 0.147  |
| OSI  | 2007 | 5 | 16 | 58 | 58.099 | P | 0.200 | -0.076 |
| EDW2 | 2007 | 5 | 16 | 58 | 58.927 | P | 0.200 | -0.644 |
| VCS  | 2007 | 5 | 16 | 59 | 1.905  | P | 0.200 | 0.150  |
| GSC  | 2007 | 5 | 16 | 59 | 2.059  | P | 0.200 | -0.179 |
| V11A | 2007 | 5 | 16 | 59 | 5.292  | P | 0.200 | 0.171  |
| BFS  | 2007 | 5 | 16 | 59 | 5.373  | P | 0.200 | -0.147 |
| TUQ  | 2007 | 5 | 16 | 59 | 5.411  | P | 0.200 | -0.063 |
| HEC  | 2007 | 5 | 16 | 59 | 7.296  | P | 0.200 | -0.222 |
| SVD  | 2007 | 5 | 16 | 59 | 8.682  | P | 0.200 | -0.244 |

|      |     |    |    |        |          |           |         |     |        |
|------|-----|----|----|--------|----------|-----------|---------|-----|--------|
| 2006 | 110 | 23 | 25 | 6.6663 | 60.94900 | 167.08900 | 22.0000 | 118 | -0.011 |
|------|-----|----|----|--------|----------|-----------|---------|-----|--------|

|      |      |     |    |    |        |   |       |        |
|------|------|-----|----|----|--------|---|-------|--------|
| K01A | 2006 | 110 | 23 | 33 | 9.860  | P | 0.200 | 0.506  |
| J02A | 2006 | 110 | 23 | 33 | 9.892  | P | 0.200 | 0.377  |
| J03A | 2006 | 110 | 23 | 33 | 12.306 | P | 0.200 | 0.525  |
| DBO  | 2006 | 110 | 23 | 33 | 12.760 | P | 0.200 | 0.369  |
| HUMO | 2006 | 110 | 23 | 33 | 16.917 | P | 0.200 | 0.425  |
| L02A | 2006 | 110 | 23 | 33 | 17.079 | P | 0.200 | 0.339  |
| YBH  | 2006 | 110 | 23 | 33 | 23.321 | P | 0.200 | 0.582  |
| JCC  | 2006 | 110 | 23 | 33 | 23.551 | P | 0.200 | 0.390  |
| M02C | 2006 | 110 | 23 | 33 | 24.990 | P | 0.200 | 0.758  |
| M04C | 2006 | 110 | 23 | 33 | 25.828 | P | 0.200 | -0.035 |
| N02C | 2006 | 110 | 23 | 33 | 26.239 | P | 0.200 | 0.276  |
| O01C | 2006 | 110 | 23 | 33 | 28.847 | P | 0.200 | 0.756  |
| WDC  | 2006 | 110 | 23 | 33 | 30.321 | P | 0.200 | 0.020  |
| M05C | 2006 | 110 | 23 | 33 | 30.816 | P | 0.200 | -0.300 |
| O02C | 2006 | 110 | 23 | 33 | 32.340 | P | 0.200 | 0.331  |
| HATC | 2006 | 110 | 23 | 33 | 32.918 | P | 0.200 | -0.229 |
| P01C | 2006 | 110 | 23 | 33 | 34.230 | P | 0.200 | 0.171  |
| M06C | 2006 | 110 | 23 | 33 | 34.315 | P | 0.200 | -0.264 |
| O03C | 2006 | 110 | 23 | 33 | 35.192 | P | 0.200 | -0.598 |
| O04C | 2006 | 110 | 23 | 33 | 37.487 | P | 0.200 | -0.134 |
| HOPS | 2006 | 110 | 23 | 33 | 37.939 | P | 0.200 | -0.112 |
| ORV  | 2006 | 110 | 23 | 33 | 39.679 | P | 0.200 | -0.866 |
| O05C | 2006 | 110 | 23 | 33 | 40.138 | P | 0.200 | -0.205 |
| SUTB | 2006 | 110 | 23 | 33 | 40.237 | P | 0.200 | -1.199 |
| MNRC | 2006 | 110 | 23 | 33 | 41.608 | P | 0.200 | 0.399  |
| BEK  | 2006 | 110 | 23 | 33 | 42.652 | P | 0.200 | -0.528 |
| O06A | 2006 | 110 | 23 | 33 | 42.974 | P | 0.200 | -0.250 |
| MCCM | 2006 | 110 | 23 | 33 | 43.346 | P | 0.200 | -0.432 |
| CVS  | 2006 | 110 | 23 | 33 | 43.902 | P | 0.200 | -0.406 |
| Q03C | 2006 | 110 | 23 | 33 | 44.758 | P | 0.200 | 0.630  |
| Q04C | 2006 | 110 | 23 | 33 | 44.987 | P | 0.200 | -0.257 |
| P05C | 2006 | 110 | 23 | 33 | 45.089 | P | 0.200 | -0.517 |
| FARB | 2006 | 110 | 23 | 33 | 45.525 | P | 0.200 | -0.533 |
| N08A | 2006 | 110 | 23 | 33 | 45.831 | P | 0.200 | 0.009  |
| O07A | 2006 | 110 | 23 | 33 | 46.717 | P | 0.200 | -0.094 |
| BRK  | 2006 | 110 | 23 | 33 | 47.616 | P | 0.200 | -0.279 |
| LAVA | 2006 | 110 | 23 | 33 | 47.818 | P | 0.200 | -0.443 |
| BKS  | 2006 | 110 | 23 | 33 | 47.894 | P | 0.200 | -0.017 |
| BRIB | 2006 | 110 | 23 | 33 | 47.897 | P | 0.200 | -0.020 |
| WCN  | 2006 | 110 | 23 | 33 | 48.554 | P | 0.200 | -0.229 |
| O08A | 2006 | 110 | 23 | 33 | 48.753 | P | 0.200 | 0.003  |
| BDM  | 2006 | 110 | 23 | 33 | 48.999 | P | 0.200 | 0.167  |
| R04C | 2006 | 110 | 23 | 33 | 50.108 | P | 0.200 | -0.282 |
| JRSC | 2006 | 110 | 23 | 33 | 50.262 | P | 0.200 | -0.543 |
| P07A | 2006 | 110 | 23 | 33 | 50.367 | P | 0.200 | -0.177 |
| BMN  | 2006 | 110 | 23 | 33 | 51.080 | P | 0.200 | -0.272 |
| BNLO | 2006 | 110 | 23 | 33 | 52.217 | P | 0.200 | -0.528 |
| P08A | 2006 | 110 | 23 | 33 | 52.909 | P | 0.200 | 0.357  |
| S04C | 2006 | 110 | 23 | 33 | 53.474 | P | 0.200 | -0.177 |
| MHC  | 2006 | 110 | 23 | 33 | 53.501 | P | 0.200 | -0.105 |
| CMB  | 2006 | 110 | 23 | 33 | 54.040 | P | 0.200 | 0.149  |

|      |      |     |    |    |        |   |       |        |
|------|------|-----|----|----|--------|---|-------|--------|
| Q07A | 2006 | 110 | 23 | 33 | 54.241 | P | 0.200 | -0.085 |
| R06C | 2006 | 110 | 23 | 33 | 54.635 | P | 0.200 | 0.014  |
| SN76 | 2006 | 110 | 23 | 33 | 55.576 | P | 0.200 | 0.113  |
| SN71 | 2006 | 110 | 23 | 33 | 55.903 | P | 0.200 | -0.217 |
| SN73 | 2006 | 110 | 23 | 33 | 56.031 | P | 0.200 | -0.267 |
| S06C | 2006 | 110 | 23 | 33 | 56.794 | P | 0.200 | -0.197 |
| PACP | 2006 | 110 | 23 | 33 | 56.892 | P | 0.200 | 0.069  |
| P09A | 2006 | 110 | 23 | 33 | 56.901 | P | 0.200 | 0.033  |
| SN67 | 2006 | 110 | 23 | 33 | 57.345 | P | 0.200 | 0.122  |
| SAO  | 2006 | 110 | 23 | 33 | 57.633 | P | 0.200 | -0.006 |
| SN62 | 2006 | 110 | 23 | 33 | 57.745 | P | 0.200 | -0.370 |
| S05C | 2006 | 110 | 23 | 33 | 57.867 | P | 0.200 | -0.374 |
| Q08A | 2006 | 110 | 23 | 33 | 58.063 | P | 0.200 | -0.080 |
| SN57 | 2006 | 110 | 23 | 33 | 58.898 | P | 0.200 | 0.265  |
| R07C | 2006 | 110 | 23 | 33 | 58.932 | P | 0.200 | 0.137  |
| SN55 | 2006 | 110 | 23 | 33 | 59.200 | P | 0.200 | 0.135  |
| SN54 | 2006 | 110 | 23 | 33 | 59.258 | P | 0.200 | 0.041  |
| HAST | 2006 | 110 | 23 | 33 | 59.379 | P | 0.200 | -0.155 |
| SN53 | 2006 | 110 | 23 | 33 | 59.704 | P | 0.200 | -0.196 |
| SN51 | 2006 | 110 | 23 | 33 | 59.726 | P | 0.200 | -0.028 |
| MNV  | 2006 | 110 | 23 | 33 | 59.877 | P | 0.200 | 0.048  |
| SN52 | 2006 | 110 | 23 | 33 | 59.925 | P | 0.200 | -0.278 |
| T05C | 2006 | 110 | 23 | 34 | 0.132  | P | 0.200 | 0.406  |
| SN48 | 2006 | 110 | 23 | 34 | 0.133  | P | 0.200 | 0.065  |
| R08A | 2006 | 110 | 23 | 34 | 0.501  | P | 0.200 | 0.033  |
| SN47 | 2006 | 110 | 23 | 34 | 0.850  | P | 0.200 | 0.235  |
| Q09A | 2006 | 110 | 23 | 34 | 1.050  | P | 0.200 | 0.062  |
| SN38 | 2006 | 110 | 23 | 34 | 1.642  | P | 0.200 | 0.136  |
| SN46 | 2006 | 110 | 23 | 34 | 1.654  | P | 0.200 | 0.404  |
| SN44 | 2006 | 110 | 23 | 34 | 1.682  | P | 0.200 | 0.280  |
| T06C | 2006 | 110 | 23 | 34 | 2.389  | P | 0.200 | -0.215 |
| SN37 | 2006 | 110 | 23 | 34 | 2.501  | P | 0.200 | 0.272  |
| U04C | 2006 | 110 | 23 | 34 | 2.957  | P | 0.200 | 0.383  |
| V03C | 2006 | 110 | 23 | 34 | 3.017  | P | 0.200 | 0.160  |
| SN28 | 2006 | 110 | 23 | 34 | 3.284  | P | 0.200 | 0.281  |
| SN22 | 2006 | 110 | 23 | 34 | 3.739  | P | 0.200 | -0.249 |
| SN21 | 2006 | 110 | 23 | 34 | 3.979  | P | 0.200 | -0.466 |
| SN23 | 2006 | 110 | 23 | 34 | 3.991  | P | 0.200 | -0.004 |
| SN26 | 2006 | 110 | 23 | 34 | 4.236  | P | 0.200 | 0.492  |
| SN25 | 2006 | 110 | 23 | 34 | 4.775  | P | 0.200 | 0.313  |
| TPH  | 2006 | 110 | 23 | 34 | 5.050  | P | 0.200 | -0.431 |
| SN11 | 2006 | 110 | 23 | 34 | 5.240  | P | 0.200 | -0.568 |
| U05C | 2006 | 110 | 23 | 34 | 5.640  | P | 0.200 | 0.661  |
| SN15 | 2006 | 110 | 23 | 34 | 5.695  | P | 0.200 | 0.431  |
| PKD  | 2006 | 110 | 23 | 34 | 6.064  | P | 0.200 | 0.152  |
| S08C | 2006 | 110 | 23 | 34 | 6.070  | P | 0.200 | 0.452  |
| SN16 | 2006 | 110 | 23 | 34 | 6.560  | P | 0.200 | 0.482  |
| V04C | 2006 | 110 | 23 | 34 | 6.838  | P | 0.200 | 0.327  |
| S09A | 2006 | 110 | 23 | 34 | 7.443  | P | 0.200 | -0.110 |
| RCT  | 2006 | 110 | 23 | 34 | 7.911  | P | 0.200 | -0.446 |
| TIN  | 2006 | 110 | 23 | 34 | 8.229  | P | 0.200 | 0.356  |
| V05C | 2006 | 110 | 23 | 34 | 9.212  | P | 0.200 | 0.595  |
| VES  | 2006 | 110 | 23 | 34 | 11.179 | P | 0.200 | -0.597 |
| GRA  | 2006 | 110 | 23 | 34 | 11.543 | P | 0.200 | 0.415  |
| SMM  | 2006 | 110 | 23 | 34 | 12.056 | P | 0.200 | 0.296  |
| CWC  | 2006 | 110 | 23 | 34 | 12.305 | P | 0.200 | 0.152  |
| SDP  | 2006 | 110 | 23 | 34 | 14.493 | P | 0.200 | -0.006 |
| ISA  | 2006 | 110 | 23 | 34 | 14.698 | P | 0.200 | -0.412 |
| MPP  | 2006 | 110 | 23 | 34 | 15.429 | P | 0.200 | 0.324  |
| TPNV | 2006 | 110 | 23 | 34 | 15.574 | P | 0.200 | -0.090 |
| FUR  | 2006 | 110 | 23 | 34 | 16.309 | P | 0.200 | 0.318  |
| ARV  | 2006 | 110 | 23 | 34 | 16.634 | P | 0.200 | -0.378 |
| MPM  | 2006 | 110 | 23 | 34 | 16.764 | P | 0.200 | 0.269  |

|      |      |     |    |    |        |   |       |        |
|------|------|-----|----|----|--------|---|-------|--------|
| SBC  | 2006 | 110 | 23 | 34 | 18.077 | P | 0.200 | 0.081  |
| LRL  | 2006 | 110 | 23 | 34 | 18.982 | P | 0.200 | -0.224 |
| OSI  | 2006 | 110 | 23 | 34 | 20.587 | P | 0.200 | -0.016 |
| SCZ2 | 2006 | 110 | 23 | 34 | 20.588 | P | 0.200 | -0.301 |
| EDW2 | 2006 | 110 | 23 | 34 | 21.346 | P | 0.200 | -0.142 |
| SHO  | 2006 | 110 | 23 | 34 | 21.783 | P | 0.200 | 0.142  |
| LGU  | 2006 | 110 | 23 | 34 | 21.947 | P | 0.200 | -0.418 |
| GSC  | 2006 | 110 | 23 | 34 | 23.461 | P | 0.200 | 0.183  |
| DEC  | 2006 | 110 | 23 | 34 | 23.936 | P | 0.200 | -0.116 |
| RRX  | 2006 | 110 | 23 | 34 | 25.273 | P | 0.200 | 0.207  |
| SNCC | 2006 | 110 | 23 | 34 | 25.666 | P | 0.200 | -0.185 |
| TUQ  | 2006 | 110 | 23 | 34 | 25.883 | P | 0.200 | 0.209  |
| BFS  | 2006 | 110 | 23 | 34 | 26.771 | P | 0.200 | 0.117  |
| FMP  | 2006 | 110 | 23 | 34 | 27.058 | P | 0.200 | -0.224 |
| HEC  | 2006 | 110 | 23 | 34 | 27.884 | P | 0.200 | 0.115  |
| CIA  | 2006 | 110 | 23 | 34 | 28.486 | P | 0.200 | -0.414 |
| BBR  | 2006 | 110 | 23 | 34 | 29.288 | P | 0.200 | -0.025 |

|      |      |     |    |         |          |          |        |        |        |
|------|------|-----|----|---------|----------|----------|--------|--------|--------|
| 2006 | 166  | 6   | 49 | 50.5003 | 45.38900 | 97.35400 | 9.0000 | 138    | -0.011 |
| I03A | 2006 | 166 | 7  | 2       | 20.750   | P        | 0.200  | -0.156 |        |
| J02A | 2006 | 166 | 7  | 2       | 22.893   | P        | 0.200  | -0.291 |        |
| K01A | 2006 | 166 | 7  | 2       | 23.994   | P        | 0.200  | -0.047 |        |
| J03A | 2006 | 166 | 7  | 2       | 24.099   | P        | 0.200  | 0.001  |        |
| DBO  | 2006 | 166 | 7  | 2       | 24.814   | P        | 0.200  | -0.118 |        |
| K02A | 2006 | 166 | 7  | 2       | 25.675   | P        | 0.200  | -0.289 |        |
| HUMO | 2006 | 166 | 7  | 2       | 27.591   | P        | 0.200  | -0.038 |        |
| L02A | 2006 | 166 | 7  | 2       | 28.353   | P        | 0.200  | -0.177 |        |
| M01C | 2006 | 166 | 7  | 2       | 28.822   | P        | 0.200  | 0.009  |        |
| K04A | 2006 | 166 | 7  | 2       | 29.294   | P        | 0.200  | -0.308 |        |
| L04A | 2006 | 166 | 7  | 2       | 30.934   | P        | 0.200  | -0.334 |        |
| YBH  | 2006 | 166 | 7  | 2       | 31.639   | P        | 0.200  | -0.181 |        |
| M04C | 2006 | 166 | 7  | 2       | 32.757   | P        | 0.200  | -0.469 |        |
| M02C | 2006 | 166 | 7  | 2       | 33.295   | P        | 0.200  | 0.225  |        |
| JCC  | 2006 | 166 | 7  | 2       | 33.502   | P        | 0.200  | -0.020 |        |
| M03C | 2006 | 166 | 7  | 2       | 34.282   | P        | 0.200  | -0.705 |        |
| N02C | 2006 | 166 | 7  | 2       | 34.576   | P        | 0.200  | -0.232 |        |
| M05C | 2006 | 166 | 7  | 2       | 35.848   | P        | 0.200  | -0.433 |        |
| WDC  | 2006 | 166 | 7  | 2       | 36.519   | P        | 0.200  | -0.546 |        |
| O01C | 2006 | 166 | 7  | 2       | 37.057   | P        | 0.200  | 0.268  |        |
| HATC | 2006 | 166 | 7  | 2       | 37.766   | P        | 0.200  | -0.253 |        |
| M06C | 2006 | 166 | 7  | 2       | 37.990   | P        | 0.200  | 0.022  |        |
| O02C | 2006 | 166 | 7  | 2       | 38.551   | P        | 0.200  | -0.127 |        |
| M07A | 2006 | 166 | 7  | 2       | 39.153   | P        | 0.200  | 0.072  |        |
| O03C | 2006 | 166 | 7  | 2       | 39.721   | P        | 0.200  | -0.764 |        |
| ELFS | 2006 | 166 | 7  | 2       | 40.096   | P        | 0.200  | 0.042  |        |
| P01C | 2006 | 166 | 7  | 2       | 40.403   | P        | 0.200  | -0.119 |        |
| O04C | 2006 | 166 | 7  | 2       | 40.662   | P        | 0.200  | -0.151 |        |
| GASB | 2006 | 166 | 7  | 2       | 41.304   | P        | 0.200  | 0.307  |        |
| N07B | 2006 | 166 | 7  | 2       | 41.945   | P        | 0.200  | -0.133 |        |
| ORV  | 2006 | 166 | 7  | 2       | 42.164   | P        | 0.200  | -1.177 |        |
| O05C | 2006 | 166 | 7  | 2       | 42.209   | P        | 0.200  | -0.322 |        |
| HOPS | 2006 | 166 | 7  | 2       | 43.106   | P        | 0.200  | 0.017  |        |
| SUTB | 2006 | 166 | 7  | 2       | 43.131   | P        | 0.200  | -1.003 |        |
| O06A | 2006 | 166 | 7  | 2       | 43.239   | P        | 0.200  | -0.108 |        |
| N08A | 2006 | 166 | 7  | 2       | 43.327   | P        | 0.200  | -0.034 |        |
| MNRC | 2006 | 166 | 7  | 2       | 44.986   | P        | 0.200  | 0.261  |        |
| O07A | 2006 | 166 | 7  | 2       | 44.994   | P        | 0.200  | 0.104  |        |
| P06A | 2006 | 166 | 7  | 2       | 45.208   | P        | 0.200  | -0.098 |        |
| P05C | 2006 | 166 | 7  | 2       | 45.501   | P        | 0.200  | -0.429 |        |
| BMN  | 2006 | 166 | 7  | 2       | 46.153   | P        | 0.200  | -0.036 |        |
| Q04C | 2006 | 166 | 7  | 2       | 46.540   | P        | 0.200  | 0.156  |        |
| CVS  | 2006 | 166 | 7  | 2       | 46.651   | P        | 0.200  | -0.169 |        |
| Q03C | 2006 | 166 | 7  | 2       | 47.122   | P        | 0.200  | 0.860  |        |

|      |      |     |   |   |        |   |       |        |
|------|------|-----|---|---|--------|---|-------|--------|
| LAVA | 2006 | 166 | 7 | 2 | 47.461 | P | 0.200 | -0.466 |
| O09A | 2006 | 166 | 7 | 2 | 47.525 | P | 0.200 | 0.301  |
| P07A | 2006 | 166 | 7 | 2 | 47.784 | P | 0.200 | 0.150  |
| P08A | 2006 | 166 | 7 | 2 | 48.525 | P | 0.200 | 0.456  |
| BRK  | 2006 | 166 | 7 | 2 | 49.054 | P | 0.200 | -0.034 |
| BKS  | 2006 | 166 | 7 | 2 | 49.185 | P | 0.200 | 0.167  |
| R05C | 2006 | 166 | 7 | 2 | 49.326 | P | 0.200 | -0.062 |
| R04C | 2006 | 166 | 7 | 2 | 49.448 | P | 0.200 | -0.008 |
| P09A | 2006 | 166 | 7 | 2 | 49.902 | P | 0.200 | -0.227 |
| Q07A | 2006 | 166 | 7 | 2 | 50.219 | P | 0.200 | 0.124  |
| WENL | 2006 | 166 | 7 | 2 | 51.085 | P | 0.200 | 0.139  |
| R06C | 2006 | 166 | 7 | 2 | 51.205 | P | 0.200 | 0.120  |
| SN84 | 2006 | 166 | 7 | 2 | 51.323 | P | 0.200 | -0.227 |
| CMB  | 2006 | 166 | 7 | 2 | 51.359 | P | 0.200 | -0.090 |
| SN85 | 2006 | 166 | 7 | 2 | 51.382 | P | 0.200 | 0.023  |
| Q08A | 2006 | 166 | 7 | 2 | 51.555 | P | 0.200 | -0.435 |
| SN76 | 2006 | 166 | 7 | 2 | 52.039 | P | 0.200 | 0.295  |
| S04C | 2006 | 166 | 7 | 2 | 52.175 | P | 0.200 | -0.108 |
| BNLO | 2006 | 166 | 7 | 2 | 52.250 | P | 0.200 | -0.088 |
| MHC  | 2006 | 166 | 7 | 2 | 52.595 | P | 0.200 | 0.066  |
| SN71 | 2006 | 166 | 7 | 2 | 52.632 | P | 0.200 | -0.412 |
| SN73 | 2006 | 166 | 7 | 2 | 52.681 | P | 0.200 | -0.187 |
| SN67 | 2006 | 166 | 7 | 2 | 52.935 | P | 0.200 | 0.366  |
| Q09A | 2006 | 166 | 7 | 2 | 53.012 | P | 0.200 | -0.033 |
| S06C | 2006 | 166 | 7 | 2 | 53.096 | P | 0.200 | -0.012 |
| SN66 | 2006 | 166 | 7 | 2 | 53.173 | P | 0.200 | 0.307  |
| MNV  | 2006 | 166 | 7 | 2 | 53.398 | P | 0.200 | 0.033  |
| R08A | 2006 | 166 | 7 | 2 | 53.823 | P | 0.200 | 0.116  |
| SN64 | 2006 | 166 | 7 | 2 | 53.830 | P | 0.200 | 0.148  |
| SN57 | 2006 | 166 | 7 | 2 | 53.951 | P | 0.200 | 0.603  |
| R07C | 2006 | 166 | 7 | 2 | 54.058 | P | 0.200 | 0.380  |
| S05C | 2006 | 166 | 7 | 2 | 54.093 | P | 0.200 | -0.301 |
| SN48 | 2006 | 166 | 7 | 2 | 54.259 | P | 0.200 | 0.234  |
| SN55 | 2006 | 166 | 7 | 2 | 54.405 | P | 0.200 | 0.333  |
| PACP | 2006 | 166 | 7 | 2 | 54.819 | P | 0.200 | 0.502  |
| Q11A | 2006 | 166 | 7 | 2 | 54.822 | P | 0.200 | -0.501 |
| SN52 | 2006 | 166 | 7 | 2 | 54.968 | P | 0.200 | -0.270 |
| SN47 | 2006 | 166 | 7 | 2 | 55.003 | P | 0.200 | 0.366  |
| SN38 | 2006 | 166 | 7 | 2 | 55.068 | P | 0.200 | 0.348  |
| SAO  | 2006 | 166 | 7 | 2 | 55.176 | P | 0.200 | 0.159  |
| SN51 | 2006 | 166 | 7 | 2 | 55.363 | P | 0.200 | 0.176  |
| SN46 | 2006 | 166 | 7 | 2 | 55.672 | P | 0.200 | 0.412  |
| SN37 | 2006 | 166 | 7 | 2 | 55.821 | P | 0.200 | 0.343  |
| SN44 | 2006 | 166 | 7 | 2 | 55.887 | P | 0.200 | 0.206  |
| TPH  | 2006 | 166 | 7 | 2 | 56.088 | P | 0.200 | -0.259 |
| SN28 | 2006 | 166 | 7 | 2 | 56.117 | P | 0.200 | 0.559  |
| SN36 | 2006 | 166 | 7 | 2 | 56.283 | P | 0.200 | 0.448  |
| T05C | 2006 | 166 | 7 | 2 | 56.382 | P | 0.200 | 0.596  |
| HAST | 2006 | 166 | 7 | 2 | 56.468 | P | 0.200 | -0.018 |
| T06C | 2006 | 166 | 7 | 2 | 56.644 | P | 0.200 | -0.242 |
| SN26 | 2006 | 166 | 7 | 2 | 57.045 | P | 0.200 | 0.623  |
| SN22 | 2006 | 166 | 7 | 2 | 57.323 | P | 0.200 | -0.200 |
| SN21 | 2006 | 166 | 7 | 2 | 57.484 | P | 0.200 | -0.469 |
| SN25 | 2006 | 166 | 7 | 2 | 57.513 | P | 0.200 | 0.278  |
| S09A | 2006 | 166 | 7 | 2 | 57.775 | P | 0.200 | -0.023 |
| S08C | 2006 | 166 | 7 | 2 | 58.078 | P | 0.200 | 0.556  |
| SN15 | 2006 | 166 | 7 | 2 | 58.115 | P | 0.200 | 0.375  |
| SN11 | 2006 | 166 | 7 | 2 | 58.156 | P | 0.200 | -0.472 |
| SN16 | 2006 | 166 | 7 | 2 | 58.431 | P | 0.200 | 0.475  |
| U05C | 2006 | 166 | 7 | 2 | 59.556 | P | 0.200 | 0.733  |
| TIN  | 2006 | 166 | 7 | 2 | 59.619 | P | 0.200 | 0.461  |
| RCT  | 2006 | 166 | 7 | 3 | 0.015  | P | 0.200 | -0.363 |
| PKD  | 2006 | 166 | 7 | 3 | 0.061  | P | 0.200 | 0.061  |

|      |      |     |   |   |        |   |       |        |
|------|------|-----|---|---|--------|---|-------|--------|
| V04C | 2006 | 166 | 7 | 3 | 1.115  | P | 0.200 | 0.487  |
| GRA  | 2006 | 166 | 7 | 3 | 1.154  | P | 0.200 | 0.754  |
| V05C | 2006 | 166 | 7 | 3 | 1.712  | P | 0.200 | 0.528  |
| VES  | 2006 | 166 | 7 | 3 | 1.758  | P | 0.200 | -0.933 |
| CWC  | 2006 | 166 | 7 | 3 | 2.035  | P | 0.200 | 0.036  |
| TPNV | 2006 | 166 | 7 | 3 | 2.278  | P | 0.200 | -0.224 |
| PHL  | 2006 | 166 | 7 | 3 | 2.391  | P | 0.200 | 0.300  |
| ISA  | 2006 | 166 | 7 | 3 | 3.700  | P | 0.200 | -0.678 |
| FUR  | 2006 | 166 | 7 | 3 | 3.782  | P | 0.200 | 0.506  |
| SMM  | 2006 | 166 | 7 | 3 | 3.867  | P | 0.200 | 0.395  |
| MPM  | 2006 | 166 | 7 | 3 | 4.632  | P | 0.200 | 0.133  |
| ARV  | 2006 | 166 | 7 | 3 | 5.491  | P | 0.200 | -0.503 |
| MPP  | 2006 | 166 | 7 | 3 | 6.181  | P | 0.200 | 0.531  |
| LRL  | 2006 | 166 | 7 | 3 | 6.626  | P | 0.200 | 0.116  |
| SHO  | 2006 | 166 | 7 | 3 | 6.887  | P | 0.200 | 0.171  |
| OSI  | 2006 | 166 | 7 | 3 | 8.647  | P | 0.200 | 0.154  |
| GSC  | 2006 | 166 | 7 | 3 | 8.683  | P | 0.200 | 0.157  |
| EDW2 | 2006 | 166 | 7 | 3 | 8.712  | P | 0.200 | 0.336  |
| TUQ  | 2006 | 166 | 7 | 3 | 9.405  | P | 0.200 | 0.181  |
| LGU  | 2006 | 166 | 7 | 3 | 9.667  | P | 0.200 | -0.433 |
| DEC  | 2006 | 166 | 7 | 3 | 10.311 | P | 0.200 | -0.239 |
| RRX  | 2006 | 166 | 7 | 3 | 10.343 | P | 0.200 | 0.422  |
| PAS  | 2006 | 166 | 7 | 3 | 10.851 | P | 0.200 | -0.365 |
| MWC  | 2006 | 166 | 7 | 3 | 11.012 | P | 0.200 | -0.318 |
| HEC  | 2006 | 166 | 7 | 3 | 11.315 | P | 0.200 | 0.078  |
| BFS  | 2006 | 166 | 7 | 3 | 11.462 | P | 0.200 | -0.310 |
| BBR  | 2006 | 166 | 7 | 3 | 12.678 | P | 0.200 | -0.328 |
| CIA  | 2006 | 166 | 7 | 3 | 13.479 | P | 0.200 | -0.568 |

|      |      |     |   |         |          |           |         |        |        |
|------|------|-----|---|---------|----------|-----------|---------|--------|--------|
| 2006 | 249  | 5   | 0 | 28.3869 | 61.63000 | 168.63800 | 10.0000 | 214    | -0.015 |
| J03A | 2006 | 249 | 5 | 8       | 29.267   | P         | 0.200   | 0.773  |        |
| L02A | 2006 | 249 | 5 | 8       | 34.112   | P         | 0.200   | 0.475  |        |
| J05A | 2006 | 249 | 5 | 8       | 36.363   | P         | 0.200   | 0.602  |        |
| K04A | 2006 | 249 | 5 | 8       | 38.275   | P         | 0.200   | 0.308  |        |
| YBH  | 2006 | 249 | 5 | 8       | 40.273   | P         | 0.200   | 0.633  |        |
| L04A | 2006 | 249 | 5 | 8       | 40.375   | P         | 0.200   | 0.330  |        |
| K05A | 2006 | 249 | 5 | 8       | 41.184   | P         | 0.200   | 0.661  |        |
| M02C | 2006 | 249 | 5 | 8       | 42.088   | P         | 0.200   | 0.912  |        |
| M04C | 2006 | 249 | 5 | 8       | 42.993   | P         | 0.200   | 0.268  |        |
| N02C | 2006 | 249 | 5 | 8       | 43.273   | P         | 0.200   | 0.275  |        |
| M03C | 2006 | 249 | 5 | 8       | 44.925   | P         | 0.200   | 0.113  |        |
| L05A | 2006 | 249 | 5 | 8       | 45.484   | P         | 0.200   | 0.486  |        |
| WDC  | 2006 | 249 | 5 | 8       | 47.405   | P         | 0.200   | 0.071  |        |
| M05C | 2006 | 249 | 5 | 8       | 48.107   | P         | 0.200   | 0.103  |        |
| O02C | 2006 | 249 | 5 | 8       | 49.432   | P         | 0.200   | 0.341  |        |
| HATC | 2006 | 249 | 5 | 8       | 50.234   | P         | 0.200   | 0.126  |        |
| L07A | 2006 | 249 | 5 | 8       | 51.273   | P         | 0.200   | 0.508  |        |
| M06C | 2006 | 249 | 5 | 8       | 51.603   | P         | 0.200   | 0.137  |        |
| GASB | 2006 | 249 | 5 | 8       | 53.198   | P         | 0.200   | 0.569  |        |
| ELFS | 2006 | 249 | 5 | 8       | 54.386   | P         | 0.200   | 0.313  |        |
| O04C | 2006 | 249 | 5 | 8       | 54.748   | P         | 0.200   | 0.112  |        |
| SNG5 | 2006 | 249 | 5 | 8       | 55.827   | P         | 0.200   | -0.717 |        |
| M07A | 2006 | 249 | 5 | 8       | 55.413   | P         | 0.200   | 0.269  |        |
| N06A | 2006 | 249 | 5 | 8       | 56.644   | P         | 0.200   | -0.020 |        |
| ORV  | 2006 | 249 | 5 | 8       | 56.645   | P         | 0.200   | -1.009 |        |
| SNF6 | 2006 | 249 | 5 | 8       | 57.923   | P         | 0.200   | -0.581 |        |
| O05C | 2006 | 249 | 5 | 8       | 57.385   | P         | 0.200   | -0.006 |        |
| SUTB | 2006 | 249 | 5 | 8       | 57.551   | P         | 0.200   | -1.044 |        |
| SNE7 | 2006 | 249 | 5 | 8       | 58.964   | P         | 0.200   | -0.191 |        |
| SNE5 | 2006 | 249 | 5 | 8       | 59.403   | P         | 0.200   | -0.690 |        |
| SNE4 | 2006 | 249 | 5 | 8       | 59.633   | P         | 0.200   | -0.420 |        |
| MNRC | 2006 | 249 | 5 | 8       | 58.689   | P         | 0.200   | 0.255  |        |
| SNE6 | 2006 | 249 | 5 | 8       | 59.789   | P         | 0.200   | -0.949 |        |

|      |      |     |   |   |        |   |       |        |
|------|------|-----|---|---|--------|---|-------|--------|
| N07B | 2006 | 249 | 5 | 8 | 59.585 | P | 0.200 | -0.015 |
| BEK  | 2006 | 249 | 5 | 8 | 59.690 | P | 0.200 | -0.521 |
| O06A | 2006 | 249 | 5 | 9 | 0.111  | P | 0.200 | -0.097 |
| SND5 | 2006 | 249 | 5 | 9 | 1.329  | P | 0.200 | -0.724 |
| SND8 | 2006 | 249 | 5 | 9 | 1.569  | P | 0.200 | -0.381 |
| CVS  | 2006 | 249 | 5 | 9 | 1.247  | P | 0.200 | -0.361 |
| SND4 | 2006 | 249 | 5 | 9 | 1.518  | P | 0.200 | -0.594 |
| SNC7 | 2006 | 249 | 5 | 9 | 3.036  | P | 0.200 | -0.464 |
| P05C | 2006 | 249 | 5 | 9 | 2.151  | P | 0.200 | -0.571 |
| SNC5 | 2006 | 249 | 5 | 9 | 3.162  | P | 0.200 | -0.514 |
| Q04C | 2006 | 249 | 5 | 9 | 2.332  | P | 0.200 | -0.112 |
| SNC4 | 2006 | 249 | 5 | 9 | 3.447  | P | 0.200 | -0.655 |
| P06A | 2006 | 249 | 5 | 9 | 2.795  | P | 0.200 | -0.110 |
| N08A | 2006 | 249 | 5 | 9 | 2.797  | P | 0.200 | 0.109  |
| SNC6 | 2006 | 249 | 5 | 9 | 4.144  | P | 0.200 | -0.468 |
| O07A | 2006 | 249 | 5 | 9 | 3.874  | P | 0.200 | 0.096  |
| SNB5 | 2006 | 249 | 5 | 9 | 5.274  | P | 0.200 | -0.477 |
| SNB7 | 2006 | 249 | 5 | 9 | 5.666  | P | 0.200 | -0.390 |
| SNB3 | 2006 | 249 | 5 | 9 | 5.667  | P | 0.200 | -0.029 |
| LAVA | 2006 | 249 | 5 | 9 | 4.897  | P | 0.200 | -0.544 |
| WCN  | 2006 | 249 | 5 | 9 | 5.837  | P | 0.200 | -0.032 |
| O08A | 2006 | 249 | 5 | 9 | 5.874  | P | 0.200 | 0.194  |
| BDM  | 2006 | 249 | 5 | 9 | 6.115  | P | 0.200 | -0.035 |
| SNA7 | 2006 | 249 | 5 | 9 | 7.186  | P | 0.200 | -0.004 |
| SNA4 | 2006 | 249 | 5 | 9 | 7.363  | P | 0.200 | -0.428 |
| SNA8 | 2006 | 249 | 5 | 9 | 7.615  | P | 0.200 | -0.114 |
| SNA3 | 2006 | 249 | 5 | 9 | 7.812  | P | 0.200 | 0.005  |
| R04C | 2006 | 249 | 5 | 9 | 7.203  | P | 0.200 | -0.433 |
| P07A | 2006 | 249 | 5 | 9 | 7.594  | P | 0.200 | 0.026  |
| SN97 | 2006 | 249 | 5 | 9 | 8.739  | P | 0.200 | -0.010 |
| R05C | 2006 | 249 | 5 | 9 | 8.206  | P | 0.200 | -0.247 |
| BMN  | 2006 | 249 | 5 | 9 | 8.209  | P | 0.200 | -0.024 |
| WENL | 2006 | 249 | 5 | 9 | 8.622  | P | 0.200 | -0.017 |
| BNLO | 2006 | 249 | 5 | 9 | 9.442  | P | 0.200 | -0.729 |
| SN93 | 2006 | 249 | 5 | 9 | 9.813  | P | 0.200 | 0.264  |
| SN96 | 2006 | 249 | 5 | 9 | 9.881  | P | 0.200 | -0.116 |
| P08A | 2006 | 249 | 5 | 9 | 10.044 | P | 0.200 | 0.507  |
| O09A | 2006 | 249 | 5 | 9 | 10.220 | P | 0.200 | 0.400  |
| MHC  | 2006 | 249 | 5 | 9 | 10.780 | P | 0.200 | -0.205 |
| S04C | 2006 | 249 | 5 | 9 | 10.821 | P | 0.200 | -0.176 |
| CMB  | 2006 | 249 | 5 | 9 | 11.039 | P | 0.200 | -0.105 |
| Q07A | 2006 | 249 | 5 | 9 | 11.483 | P | 0.200 | 0.060  |
| R06C | 2006 | 249 | 5 | 9 | 11.896 | P | 0.200 | 0.114  |
| P09A | 2006 | 249 | 5 | 9 | 14.026 | P | 0.200 | 0.178  |
| S06C | 2006 | 249 | 5 | 9 | 14.041 | P | 0.200 | -0.207 |
| PACP | 2006 | 249 | 5 | 9 | 14.194 | P | 0.200 | -0.040 |
| SAO  | 2006 | 249 | 5 | 9 | 14.820 | P | 0.200 | -0.260 |
| S05C | 2006 | 249 | 5 | 9 | 14.992 | P | 0.200 | -0.583 |
| Q08A | 2006 | 249 | 5 | 9 | 15.237 | P | 0.200 | 0.011  |
| SN55 | 2006 | 249 | 5 | 9 | 16.279 | P | 0.200 | -0.024 |
| R07C | 2006 | 249 | 5 | 9 | 16.178 | P | 0.200 | 0.180  |
| P10A | 2006 | 249 | 5 | 9 | 16.191 | P | 0.200 | 0.205  |
| HAST | 2006 | 249 | 5 | 9 | 16.863 | P | 0.200 | -0.156 |
| T05C | 2006 | 249 | 5 | 9 | 17.522 | P | 0.200 | 0.399  |
| SN43 | 2006 | 249 | 5 | 9 | 18.596 | P | 0.200 | 0.033  |
| R08A | 2006 | 249 | 5 | 9 | 17.787 | P | 0.200 | 0.180  |
| Q09A | 2006 | 249 | 5 | 9 | 18.404 | P | 0.200 | 0.357  |
| T06C | 2006 | 249 | 5 | 9 | 19.530 | P | 0.200 | -0.417 |
| MLAC | 2006 | 249 | 5 | 9 | 20.455 | P | 0.200 | 0.911  |
| U04C | 2006 | 249 | 5 | 9 | 20.462 | P | 0.200 | 0.428  |
| V03C | 2006 | 249 | 5 | 9 | 20.579 | P | 0.200 | 0.204  |
| R09A | 2006 | 249 | 5 | 9 | 21.824 | P | 0.200 | -0.283 |
| TPH  | 2006 | 249 | 5 | 9 | 22.339 | P | 0.200 | -0.289 |



|      |      |     |   |   |        |   |       |        |
|------|------|-----|---|---|--------|---|-------|--------|
| U05C | 2006 | 249 | 5 | 9 | 23.122 | P | 0.200 | 0.707  |
| S08C | 2006 | 249 | 5 | 9 | 23.302 | P | 0.200 | 0.446  |
| PKD  | 2006 | 249 | 5 | 9 | 23.407 | P | 0.200 | 0.002  |
| Q11A | 2006 | 249 | 5 | 9 | 23.501 | P | 0.200 | -0.055 |
| HELL | 2006 | 249 | 5 | 9 | 24.058 | P | 0.200 | -0.459 |
| RAMR | 2006 | 249 | 5 | 9 | 24.429 | P | 0.200 | 0.378  |
| S09A | 2006 | 249 | 5 | 9 | 24.470 | P | 0.200 | -0.261 |
| R10A | 2006 | 249 | 5 | 9 | 24.527 | P | 0.200 | -0.087 |
| RCT  | 2006 | 249 | 5 | 9 | 25.362 | P | 0.200 | -0.395 |
| TIN  | 2006 | 249 | 5 | 9 | 25.662 | P | 0.200 | 0.504  |
| V05C | 2006 | 249 | 5 | 9 | 26.788 | P | 0.200 | 0.700  |
| PHL  | 2006 | 249 | 5 | 9 | 26.801 | P | 0.200 | 0.193  |
| VES  | 2006 | 249 | 5 | 9 | 28.677 | P | 0.200 | -0.533 |
| GRA  | 2006 | 249 | 5 | 9 | 29.104 | P | 0.200 | 0.724  |
| SMM  | 2006 | 249 | 5 | 9 | 29.547 | P | 0.200 | 0.260  |
| CWC  | 2006 | 249 | 5 | 9 | 29.601 | P | 0.200 | 0.113  |
| ISA  | 2006 | 249 | 5 | 9 | 31.943 | P | 0.200 | -0.617 |
| BAK  | 2006 | 249 | 5 | 9 | 32.945 | P | 0.200 | 0.760  |
| MPP  | 2006 | 249 | 5 | 9 | 33.009 | P | 0.200 | 0.323  |
| ARV  | 2006 | 249 | 5 | 9 | 33.599 | P | 0.200 | -0.936 |
| FUR  | 2006 | 249 | 5 | 9 | 33.711 | P | 0.200 | 0.407  |
| MPM  | 2006 | 249 | 5 | 9 | 33.881 | P | 0.200 | 0.012  |
| SLA  | 2006 | 249 | 5 | 9 | 35.676 | P | 0.200 | 0.078  |
| U10A | 2006 | 249 | 5 | 9 | 36.085 | P | 0.200 | 0.518  |
| LRL  | 2006 | 249 | 5 | 9 | 36.468 | P | 0.200 | -0.174 |
| OSI  | 2006 | 249 | 5 | 9 | 38.254 | P | 0.200 | 0.082  |
| EDW2 | 2006 | 249 | 5 | 9 | 38.857 | P | 0.200 | -0.148 |
| U11A | 2006 | 249 | 5 | 9 | 39.190 | P | 0.200 | 0.261  |
| SHO  | 2006 | 249 | 5 | 9 | 39.227 | P | 0.200 | 0.234  |
| LGU  | 2006 | 249 | 5 | 9 | 39.532 | P | 0.200 | -0.472 |
| TOV  | 2006 | 249 | 5 | 9 | 40.306 | P | 0.200 | -0.155 |
| GSC  | 2006 | 249 | 5 | 9 | 40.836 | P | 0.200 | 0.123  |
| VCS  | 2006 | 249 | 5 | 9 | 41.438 | P | 0.200 | 0.377  |
| DEC  | 2006 | 249 | 5 | 9 | 41.577 | P | 0.200 | -0.075 |
| DJJ  | 2006 | 249 | 5 | 9 | 41.647 | P | 0.200 | -0.401 |
| PAS  | 2006 | 249 | 5 | 9 | 42.588 | P | 0.200 | -0.230 |
| CHF  | 2006 | 249 | 5 | 9 | 42.675 | P | 0.200 | 0.291  |
| RRX  | 2006 | 249 | 5 | 9 | 42.800 | P | 0.200 | 0.247  |
| V11A | 2006 | 249 | 5 | 9 | 42.908 | P | 0.200 | 0.524  |
| MWC  | 2006 | 249 | 5 | 9 | 42.978 | P | 0.200 | -0.065 |
| TUQ  | 2006 | 249 | 5 | 9 | 43.265 | P | 0.200 | 0.198  |
| VTV  | 2006 | 249 | 5 | 9 | 43.440 | P | 0.200 | 0.086  |
| ADO  | 2006 | 249 | 5 | 9 | 43.486 | P | 0.200 | 0.300  |
| BFS  | 2006 | 249 | 5 | 9 | 44.389 | P | 0.200 | 0.169  |
| HEC  | 2006 | 249 | 5 | 9 | 45.394 | P | 0.200 | 0.172  |
| CIA  | 2006 | 249 | 5 | 9 | 46.322 | P | 0.200 | -0.263 |
| BBR  | 2006 | 249 | 5 | 9 | 46.927 | P | 0.200 | 0.080  |
| SVD  | 2006 | 249 | 5 | 9 | 46.950 | P | 0.200 | -0.032 |
| SDD  | 2006 | 249 | 5 | 9 | 48.336 | P | 0.200 | 0.176  |

|      |      |     |    |         |          |           |         |        |        |
|------|------|-----|----|---------|----------|-----------|---------|--------|--------|
| 2006 | 229  | 11  | 11 | 36.3002 | 55.61700 | 161.68600 | 55.0000 | 208    | -0.005 |
| I03A | 2006 | 229 | 11 | 20      | 5.525    | P         | 0.200   | 0.247  |        |
| J02A | 2006 | 229 | 11 | 20      | 7.561    | P         | 0.200   | 0.293  |        |
| J03A | 2006 | 229 | 11 | 20      | 9.962    | P         | 0.200   | 0.225  |        |
| DBO  | 2006 | 229 | 11 | 20      | 10.277   | P         | 0.200   | 0.237  |        |
| L02A | 2006 | 229 | 11 | 20      | 13.703   | P         | 0.200   | 0.219  |        |
| J05A | 2006 | 229 | 11 | 20      | 17.674   | P         | 0.200   | 0.225  |        |
| K04A | 2006 | 229 | 11 | 20      | 18.869   | P         | 0.200   | -0.029 |        |
| JCC  | 2006 | 229 | 11 | 20      | 19.057   | P         | 0.200   | 0.360  |        |
| YBH  | 2006 | 229 | 11 | 20      | 19.884   | P         | 0.200   | 0.447  |        |
| L04A | 2006 | 229 | 11 | 20      | 20.567   | P         | 0.200   | 0.043  |        |
| M02C | 2006 | 229 | 11 | 20      | 21.288   | P         | 0.200   | 0.676  |        |
| N02C | 2006 | 229 | 11 | 20      | 21.890   | P         | 0.200   | 0.144  |        |

|      |      |     |    |    |        |   |       |        |
|------|------|-----|----|----|--------|---|-------|--------|
| K05A | 2006 | 229 | 11 | 20 | 22.194 | P | 0.200 | 0.373  |
| M04C | 2006 | 229 | 11 | 20 | 22.897 | P | 0.200 | 0.013  |
| O01C | 2006 | 229 | 11 | 20 | 23.936 | P | 0.200 | 0.772  |
| M03C | 2006 | 229 | 11 | 20 | 24.273 | P | 0.200 | -0.114 |
| L05A | 2006 | 229 | 11 | 20 | 25.953 | P | 0.200 | 0.271  |
| WDC  | 2006 | 229 | 11 | 20 | 26.180 | P | 0.200 | 0.038  |
| O02C | 2006 | 229 | 11 | 20 | 27.804 | P | 0.200 | 0.367  |
| M05C | 2006 | 229 | 11 | 20 | 27.911 | P | 0.200 | -0.067 |
| P01C | 2006 | 229 | 11 | 20 | 28.759 | P | 0.200 | -0.001 |
| HATC | 2006 | 229 | 11 | 20 | 29.598 | P | 0.200 | 0.103  |
| O03C | 2006 | 229 | 11 | 20 | 30.862 | P | 0.200 | -0.497 |
| GASB | 2006 | 229 | 11 | 20 | 31.129 | P | 0.200 | 0.568  |
| M06C | 2006 | 229 | 11 | 20 | 31.587 | P | 0.200 | 0.064  |
| L07A | 2006 | 229 | 11 | 20 | 32.124 | P | 0.200 | 0.215  |
| HOPS | 2006 | 229 | 11 | 20 | 32.340 | P | 0.200 | -0.152 |
| SNG5 | 2006 | 229 | 11 | 20 | 34.199 | P | 0.200 | -0.740 |
| SNG7 | 2006 | 229 | 11 | 20 | 33.567 | P | 0.200 | -0.943 |
| O04C | 2006 | 229 | 11 | 20 | 33.851 | P | 0.200 | 0.132  |
| ELFS | 2006 | 229 | 11 | 20 | 33.873 | P | 0.200 | 0.345  |
| ORV  | 2006 | 229 | 11 | 20 | 35.031 | P | 0.200 | -0.894 |
| SNF6 | 2006 | 229 | 11 | 20 | 36.515 | P | 0.200 | -0.523 |
| SNF9 | 2006 | 229 | 11 | 20 | 36.574 | P | 0.200 | -0.607 |
| SUTB | 2006 | 229 | 11 | 20 | 35.599 | P | 0.200 | -0.870 |
| M07A | 2006 | 229 | 11 | 20 | 35.866 | P | 0.200 | 0.093  |
| SNF8 | 2006 | 229 | 11 | 20 | 37.139 | P | 0.200 | -0.128 |
| O05C | 2006 | 229 | 11 | 20 | 36.232 | P | 0.200 | 0.052  |
| MNRC | 2006 | 229 | 11 | 20 | 36.236 | P | 0.200 | 0.467  |
| N06A | 2006 | 229 | 11 | 20 | 36.436 | P | 0.200 | -0.085 |
| SNE4 | 2006 | 229 | 11 | 20 | 37.696 | P | 0.200 | -0.402 |
| SNE7 | 2006 | 229 | 11 | 20 | 37.743 | P | 0.200 | -0.173 |
| SNE5 | 2006 | 229 | 11 | 20 | 37.910 | P | 0.200 | -0.415 |
| MCCM | 2006 | 229 | 11 | 20 | 37.017 | P | 0.200 | -0.617 |
| SNE6 | 2006 | 229 | 11 | 20 | 38.389 | P | 0.200 | -0.771 |
| SNE9 | 2006 | 229 | 11 | 20 | 38.394 | P | 0.200 | -0.598 |
| CVS  | 2006 | 229 | 11 | 20 | 38.171 | P | 0.200 | -0.280 |
| BEK  | 2006 | 229 | 11 | 20 | 38.794 | P | 0.200 | -0.360 |
| SND5 | 2006 | 229 | 11 | 20 | 39.853 | P | 0.200 | -0.361 |
| FARB | 2006 | 229 | 11 | 20 | 39.115 | P | 0.200 | -0.418 |
| SND8 | 2006 | 229 | 11 | 20 | 40.531 | P | 0.200 | -0.234 |
| O06A | 2006 | 229 | 11 | 20 | 39.549 | P | 0.200 | -0.025 |
| Q03C | 2006 | 229 | 11 | 20 | 39.594 | P | 0.200 | 0.930  |
| N07B | 2006 | 229 | 11 | 20 | 39.724 | P | 0.200 | -0.067 |
| Q04C | 2006 | 229 | 11 | 20 | 40.039 | P | 0.200 | -0.090 |
| SNC5 | 2006 | 229 | 11 | 20 | 41.506 | P | 0.200 | -0.244 |
| SNC4 | 2006 | 229 | 11 | 20 | 41.516 | P | 0.200 | -0.427 |
| P05C | 2006 | 229 | 11 | 20 | 40.783 | P | 0.200 | -0.301 |
| SNC3 | 2006 | 229 | 11 | 20 | 42.046 | P | 0.200 | 0.460  |
| BRK  | 2006 | 229 | 11 | 20 | 41.398 | P | 0.200 | -0.369 |
| SNC8 | 2006 | 229 | 11 | 20 | 42.562 | P | 0.200 | -0.037 |
| BKS  | 2006 | 229 | 11 | 20 | 41.587 | P | 0.200 | -0.205 |
| BRIB | 2006 | 229 | 11 | 20 | 41.800 | P | 0.200 | -0.061 |
| P06A | 2006 | 229 | 11 | 20 | 41.992 | P | 0.200 | 0.170  |
| SNB5 | 2006 | 229 | 11 | 20 | 43.475 | P | 0.200 | -0.257 |
| LAVA | 2006 | 229 | 11 | 20 | 42.962 | P | 0.200 | -0.345 |
| SNB7 | 2006 | 229 | 11 | 20 | 44.088 | P | 0.200 | -0.260 |
| N08A | 2006 | 229 | 11 | 20 | 43.190 | P | 0.200 | 0.058  |
| O07A | 2006 | 229 | 11 | 20 | 43.613 | P | 0.200 | 0.179  |
| SNB6 | 2006 | 229 | 11 | 20 | 44.685 | P | 0.200 | -0.070 |
| JRSC | 2006 | 229 | 11 | 20 | 43.852 | P | 0.200 | -0.491 |
| SNB9 | 2006 | 229 | 11 | 20 | 45.247 | P | 0.200 | 0.399  |
| SNA4 | 2006 | 229 | 11 | 20 | 45.283 | P | 0.200 | -0.207 |
| SNA3 | 2006 | 229 | 11 | 20 | 45.618 | P | 0.200 | 0.279  |
| R04C | 2006 | 229 | 11 | 20 | 44.620 | P | 0.200 | -0.353 |

|      |      |     |    |    |        |   |       |        |
|------|------|-----|----|----|--------|---|-------|--------|
| SNA5 | 2006 | 229 | 11 | 20 | 45.629 | P | 0.200 | -0.174 |
| WCN  | 2006 | 229 | 11 | 20 | 44.658 | P | 0.200 | 0.136  |
| SNA7 | 2006 | 229 | 11 | 20 | 45.811 | P | 0.200 | 0.278  |
| WENL | 2006 | 229 | 11 | 20 | 45.189 | P | 0.200 | 0.045  |
| SNA8 | 2006 | 229 | 11 | 20 | 46.414 | P | 0.200 | 0.145  |
| BNLO | 2006 | 229 | 11 | 20 | 45.578 | P | 0.200 | -0.508 |
| O08A | 2006 | 229 | 11 | 20 | 45.945 | P | 0.200 | 0.292  |
| SN97 | 2006 | 229 | 11 | 20 | 47.174 | P | 0.200 | 0.220  |
| R05C | 2006 | 229 | 11 | 20 | 46.359 | P | 0.200 | -0.119 |
| P07A | 2006 | 229 | 11 | 20 | 46.952 | P | 0.200 | 0.247  |
| MHC  | 2006 | 229 | 11 | 20 | 47.151 | P | 0.200 | -0.127 |
| SN93 | 2006 | 229 | 11 | 20 | 47.411 | P | 0.200 | 0.497  |
| S04C | 2006 | 229 | 11 | 20 | 47.501 | P | 0.200 | -0.058 |
| SN84 | 2006 | 229 | 11 | 20 | 48.780 | P | 0.200 | -0.283 |
| SN96 | 2006 | 229 | 11 | 20 | 48.002 | P | 0.200 | 0.169  |
| SN85 | 2006 | 229 | 11 | 20 | 49.217 | P | 0.200 | 0.017  |
| CMB  | 2006 | 229 | 11 | 20 | 48.616 | P | 0.200 | 0.115  |
| BMN  | 2006 | 229 | 11 | 20 | 48.725 | P | 0.200 | 0.105  |
| SN74 | 2006 | 229 | 11 | 20 | 50.697 | P | 0.200 | -0.079 |
| P08A | 2006 | 229 | 11 | 20 | 49.787 | P | 0.200 | 0.740  |
| R06C | 2006 | 229 | 11 | 20 | 50.211 | P | 0.200 | 0.313  |
| PACP | 2006 | 229 | 11 | 20 | 50.519 | P | 0.200 | 0.125  |
| O09A | 2006 | 229 | 11 | 20 | 50.527 | P | 0.200 | 0.534  |
| SAO  | 2006 | 229 | 11 | 20 | 50.828 | P | 0.200 | -0.150 |
| S06C | 2006 | 229 | 11 | 20 | 51.579 | P | 0.200 | -0.074 |
| SN64 | 2006 | 229 | 11 | 20 | 52.772 | P | 0.200 | 0.058  |
| S05C | 2006 | 229 | 11 | 20 | 51.910 | P | 0.200 | -0.465 |
| HAST | 2006 | 229 | 11 | 20 | 52.365 | P | 0.200 | -0.216 |
| SN55 | 2006 | 229 | 11 | 20 | 53.996 | P | 0.200 | 0.102  |
| T05C | 2006 | 229 | 11 | 20 | 53.935 | P | 0.200 | 0.525  |
| P09A | 2006 | 229 | 11 | 20 | 53.935 | P | 0.200 | 0.375  |
| Q08A | 2006 | 229 | 11 | 20 | 54.282 | P | 0.200 | 0.176  |
| R07C | 2006 | 229 | 11 | 20 | 54.317 | P | 0.200 | 0.447  |
| SN43 | 2006 | 229 | 11 | 20 | 55.772 | P | 0.200 | 0.028  |
| SN45 | 2006 | 229 | 11 | 20 | 56.233 | P | 0.200 | 0.375  |
| V03C | 2006 | 229 | 11 | 20 | 55.899 | P | 0.200 | 0.174  |
| U04C | 2006 | 229 | 11 | 20 | 56.290 | P | 0.200 | 0.447  |
| P10A | 2006 | 229 | 11 | 20 | 56.305 | P | 0.200 | 0.387  |
| R08A | 2006 | 229 | 11 | 20 | 56.403 | P | 0.200 | 0.397  |
| T06C | 2006 | 229 | 11 | 20 | 56.490 | P | 0.200 | -0.196 |
| SN34 | 2006 | 229 | 11 | 20 | 57.811 | P | 0.200 | 0.273  |
| Q09A | 2006 | 229 | 11 | 20 | 57.611 | P | 0.200 | 0.485  |
| SN24 | 2006 | 229 | 11 | 20 | 58.706 | P | 0.200 | 0.289  |
| MLAC | 2006 | 229 | 11 | 20 | 58.186 | P | 0.200 | 1.055  |
| PKD  | 2006 | 229 | 11 | 20 | 58.882 | P | 0.200 | -0.118 |
| U05C | 2006 | 229 | 11 | 20 | 59.177 | P | 0.200 | 0.715  |
| RAMR | 2006 | 229 | 11 | 20 | 59.573 | P | 0.200 | 0.334  |
| R09A | 2006 | 229 | 11 | 21 | 0.679  | P | 0.200 | -0.070 |
| HELL | 2006 | 229 | 11 | 21 | 0.794  | P | 0.200 | -0.453 |
| S08C | 2006 | 229 | 11 | 21 | 1.049  | P | 0.200 | 0.510  |
| TPH  | 2006 | 229 | 11 | 21 | 1.113  | P | 0.200 | 0.018  |
| RCT  | 2006 | 229 | 11 | 21 | 1.814  | P | 0.200 | -0.281 |
| PHL  | 2006 | 229 | 11 | 21 | 1.834  | P | 0.200 | 0.099  |
| V05C | 2006 | 229 | 11 | 21 | 2.490  | P | 0.200 | 0.658  |
| TIN  | 2006 | 229 | 11 | 21 | 2.927  | P | 0.200 | 0.461  |
| S09A | 2006 | 229 | 11 | 21 | 2.959  | P | 0.200 | 0.057  |
| Q11A | 2006 | 229 | 11 | 21 | 3.170  | P | 0.200 | 0.071  |
| R10A | 2006 | 229 | 11 | 21 | 3.608  | P | 0.200 | 0.078  |
| VES  | 2006 | 229 | 11 | 21 | 4.659  | P | 0.200 | -0.603 |
| SMM  | 2006 | 229 | 11 | 21 | 4.865  | P | 0.200 | 0.306  |
| CWC  | 2006 | 229 | 11 | 21 | 6.471  | P | 0.200 | 0.133  |
| GRA  | 2006 | 229 | 11 | 21 | 6.610  | P | 0.200 | 0.678  |
| ISA  | 2006 | 229 | 11 | 21 | 7.951  | P | 0.200 | -0.694 |

|      |      |     |    |         |          |   |          |         |     |       |
|------|------|-----|----|---------|----------|---|----------|---------|-----|-------|
| MPP  | 2006 | 229 | 11 | 21      | 7.953    | P | 0.200    | 0.293   |     |       |
| ARV  | 2006 | 229 | 11 | 21      | 9.302    | P | 0.200    | -0.752  |     |       |
| SBC  | 2006 | 229 | 11 | 21      | 10.375   | P | 0.200    | 0.107   |     |       |
| MPM  | 2006 | 229 | 11 | 21      | 10.697   | P | 0.200    | 0.068   |     |       |
| FUR  | 2006 | 229 | 11 | 21      | 10.959   | P | 0.200    | 0.399   |     |       |
| SLA  | 2006 | 229 | 11 | 21      | 12.279   | P | 0.200    | 0.010   |     |       |
| LRL  | 2006 | 229 | 11 | 21      | 12.559   | P | 0.200    | -0.309  |     |       |
| SCZ2 | 2006 | 229 | 11 | 21      | 12.609   | P | 0.200    | -0.281  |     |       |
| OSI  | 2006 | 229 | 11 | 21      | 13.239   | P | 0.200    | -0.087  |     |       |
| U10A | 2006 | 229 | 11 | 21      | 13.518   | P | 0.200    | 0.549   |     |       |
| LGU  | 2006 | 229 | 11 | 21      | 14.039   | P | 0.200    | -0.601  |     |       |
| EDW2 | 2006 | 229 | 11 | 21      | 14.567   | P | 0.200    | -0.073  |     |       |
| TOV  | 2006 | 229 | 11 | 21      | 14.893   | P | 0.200    | -0.361  |     |       |
| SHO  | 2006 | 229 | 11 | 21      | 16.019   | P | 0.200    | 0.012   |     |       |
| DEC  | 2006 | 229 | 11 | 21      | 16.371   | P | 0.200    | -0.322  |     |       |
| DJJ  | 2006 | 229 | 11 | 21      | 16.380   | P | 0.200    | -0.534  |     |       |
| VCS  | 2006 | 229 | 11 | 21      | 16.541   | P | 0.200    | 0.179   |     |       |
| U11A | 2006 | 229 | 11 | 21      | 17.023   | P | 0.200    | 0.389   |     |       |
| GSC  | 2006 | 229 | 11 | 21      | 17.086   | P | 0.200    | -0.015  |     |       |
| SNCC | 2006 | 229 | 11 | 21      | 17.168   | P | 0.200    | -0.233  |     |       |
| PAS  | 2006 | 229 | 11 | 21      | 17.359   | P | 0.200    | -0.485  |     |       |
| CHF  | 2006 | 229 | 11 | 21      | 17.493   | P | 0.200    | -0.082  |     |       |
| MWC  | 2006 | 229 | 11 | 21      | 17.848   | P | 0.200    | -0.296  |     |       |
| USC  | 2006 | 229 | 11 | 21      | 18.146   | P | 0.200    | 0.128   |     |       |
| RRX  | 2006 | 229 | 11 | 21      | 18.603   | P | 0.200    | 0.075   |     |       |
| RPV  | 2006 | 229 | 11 | 21      | 18.700   | P | 0.200    | -0.418  |     |       |
| ADO  | 2006 | 229 | 11 | 21      | 18.884   | P | 0.200    | 0.131   |     |       |
| BFS  | 2006 | 229 | 11 | 21      | 19.215   | P | 0.200    | -0.267  |     |       |
| FMP  | 2006 | 229 | 11 | 21      | 19.241   | P | 0.200    | -0.298  |     |       |
| TUQ  | 2006 | 229 | 11 | 21      | 19.760   | P | 0.200    | -0.076  |     |       |
| CIA  | 2006 | 229 | 11 | 21      | 20.372   | P | 0.200    | -0.533  |     |       |
| HEC  | 2006 | 229 | 11 | 21      | 21.334   | P | 0.200    | -0.085  |     |       |
| SVD  | 2006 | 229 | 11 | 21      | 22.021   | P | 0.200    | -0.324  |     |       |
| BBR  | 2006 | 229 | 11 | 21      | 22.130   | P | 0.200    | -0.280  |     |       |
| SDD  | 2006 | 229 | 11 | 21      | 22.879   | P | 0.200    | -0.021  |     |       |
|      |      |     |    |         |          |   |          |         |     |       |
| 1997 | 279  | 21  | 13 | 13.4837 | 73.41700 |   | 7.98800  | 10.0000 | 713 | 0.000 |
| BPC  | 1997 | 279 | 21 | 23      | 46.526   | P | 0.200    | 0.145   |     |       |
| CCC  | 1997 | 279 | 21 | 23      | 50.260   | P | 0.200    | 0.061   |     |       |
| OVY  | 1997 | 279 | 21 | 23      | 48.523   | P | 0.200    | 0.166   |     |       |
| WMD  | 1997 | 279 | 21 | 23      | 52.234   | P | 0.200    | -0.130  |     |       |
| CPR  | 1997 | 279 | 21 | 23      | 48.836   | P | 0.200    | 0.388   |     |       |
| HVY  | 1997 | 279 | 21 | 23      | 49.093   | P | 0.200    | -0.640  |     |       |
| TWR2 | 1997 | 279 | 21 | 23      | 51.137   | P | 0.200    | 0.029   |     |       |
| FLL  | 1997 | 279 | 21 | 23      | 46.436   | P | 0.200    | 0.387   |     |       |
| CHP  | 1997 | 279 | 21 | 23      | 53.707   | P | 0.200    | 0.083   |     |       |
| BRR  | 1997 | 279 | 21 | 23      | 48.468   | P | 0.200    | 0.169   |     |       |
| DP00 | 1997 | 279 | 21 | 23      | 50.636   | P | 0.200    | -0.040  |     |       |
| WHP  | 1997 | 279 | 21 | 23      | 49.683   | P | 0.200    | 0.250   |     |       |
| MKW3 | 1997 | 279 | 21 | 23      | 50.804   | P | 0.200    | -0.097  |     |       |
| PDC  | 1997 | 279 | 21 | 23      | 52.862   | P | 0.200    | -0.764  |     |       |
| SLC  | 1997 | 279 | 21 | 23      | 49.056   | P | 0.200    | 0.035   |     |       |
| SRF  | 1997 | 279 | 21 | 23      | 47.114   | P | 0.200    | -0.027  |     |       |
| SFK  | 1997 | 279 | 21 | 23      | 51.343   | P | 0.200    | -0.059  |     |       |
| JUN  | 1997 | 279 | 21 | 23      | 49.786   | P | 0.200    | 0.045   |     |       |
|      |      |     |    |         |          |   |          |         |     |       |
| 1997 | 188  | 21  | 42 | 50.4451 | 75.04400 |   | -3.86900 | 10.0000 | 623 | 0.000 |
| WHP  | 1997 | 188 | 21 | 53      | 2.808    | P | 0.200    | 0.135   |     |       |
| OVY  | 1997 | 188 | 21 | 53      | 1.570    | P | 0.200    | -0.003  |     |       |
| BGR  | 1997 | 188 | 21 | 53      | 3.167    | P | 0.200    | -0.160  |     |       |
| CPR  | 1997 | 188 | 21 | 53      | 2.061    | P | 0.200    | 0.375   |     |       |
| FLL  | 1997 | 188 | 21 | 52      | 59.407   | P | 0.200    | 0.168   |     |       |
| SMD  | 1997 | 188 | 21 | 53      | 0.993    | P | 0.200    | 0.279   |     |       |

|      |      |     |    |         |          |           |         |        |     |       |
|------|------|-----|----|---------|----------|-----------|---------|--------|-----|-------|
| SFT  | 1997 | 188 | 21 | 53      | 4.825    | P         | 0.200   | 0.159  |     |       |
| LMC  | 1997 | 188 | 21 | 53      | 4.509    | P         | 0.200   | -0.529 |     |       |
| BVC  | 1997 | 188 | 21 | 53      | 0.867    | P         | 0.200   | -0.058 |     |       |
| BRR  | 1997 | 188 | 21 | 53      | 1.829    | P         | 0.200   | 0.255  |     |       |
| SFK  | 1997 | 188 | 21 | 53      | 4.745    | P         | 0.200   | -0.036 |     |       |
| DP00 | 1997 | 188 | 21 | 53      | 3.659    | P         | 0.200   | -0.267 |     |       |
| SLC  | 1997 | 188 | 21 | 53      | 2.131    | P         | 0.200   | -0.083 |     |       |
| BPC  | 1997 | 188 | 21 | 52      | 59.560   | P         | 0.200   | 0.024  |     |       |
| DAC  | 1997 | 188 | 21 | 53      | 3.423    | P         | 0.200   | -0.258 |     |       |
|      |      |     |    |         |          |           |         |        |     |       |
| 1997 | 236  | 3   | 4  | 25.8148 | 64.00200 | -21.26900 | 10.0000 |        | 668 | 0.000 |
| BGR  | 1997 | 236 | 3  | 14      | 38.677   | P         | 0.200   | 0.034  |     |       |
| SLC  | 1997 | 236 | 3  | 14      | 35.627   | P         | 0.200   | -0.163 |     |       |
| LMC  | 1997 | 236 | 3  | 14      | 39.809   | P         | 0.200   | -0.351 |     |       |
| ARC2 | 1997 | 236 | 3  | 14      | 40.708   | P         | 0.200   | 0.054  |     |       |
| SMD  | 1997 | 236 | 3  | 14      | 35.741   | P         | 0.200   | -0.018 |     |       |
| SFK  | 1997 | 236 | 3  | 14      | 39.629   | P         | 0.200   | -0.043 |     |       |
| JUN  | 1997 | 236 | 3  | 14      | 37.501   | P         | 0.200   | 0.007  |     |       |
| BRR  | 1997 | 236 | 3  | 14      | 37.405   | P         | 0.200   | 0.338  |     |       |
| FLL  | 1997 | 236 | 3  | 14      | 35.093   | P         | 0.200   | 0.165  |     |       |
| WMD  | 1997 | 236 | 3  | 14      | 40.165   | P         | 0.200   | -0.023 |     |       |
|      |      |     |    |         |          |           |         |        |     |       |
| 1997 | 269  | 0   | 33 | 14.3537 | 43.04800 | 12.87900  | 10.0000 |        | 691 | 0.000 |
| OVY  | 1997 | 269 | 0  | 46      | 9.532    | P         | 0.200   | 0.013  |     |       |
| SMD  | 1997 | 269 | 0  | 46      | 9.646    | P         | 0.200   | 0.251  |     |       |
| DP00 | 1997 | 269 | 0  | 46      | 10.098   | P         | 0.200   | -0.022 |     |       |
| BRR  | 1997 | 269 | 0  | 46      | 10.364   | P         | 0.200   | 0.121  |     |       |
| ARC2 | 1997 | 269 | 0  | 46      | 12.698   | P         | 0.200   | 0.205  |     |       |
| CPR  | 1997 | 269 | 0  | 46      | 9.919    | P         | 0.200   | 0.123  |     |       |
| JUN  | 1997 | 269 | 0  | 46      | 10.376   | P         | 0.200   | -0.087 |     |       |
| WMD  | 1997 | 269 | 0  | 46      | 12.318   | P         | 0.200   | 0.049  |     |       |
| CHP  | 1997 | 269 | 0  | 46      | 12.602   | P         | 0.200   | 0.150  |     |       |
| BPC  | 1997 | 269 | 0  | 46      | 8.714    | P         | 0.200   | 0.267  |     |       |
| CWC  | 1997 | 269 | 0  | 46      | 10.342   | P         | 0.200   | 0.193  |     |       |
| LMC  | 1997 | 269 | 0  | 46      | 11.576   | P         | 0.200   | -0.649 |     |       |
| SFK  | 1997 | 269 | 0  | 46      | 11.605   | P         | 0.200   | -0.276 |     |       |
| TWR2 | 1997 | 269 | 0  | 46      | 11.118   | P         | 0.200   | -0.146 |     |       |
| SRF  | 1997 | 269 | 0  | 46      | 8.648    | P         | 0.200   | 0.117  |     |       |
| WHP  | 1997 | 269 | 0  | 46      | 10.154   | P         | 0.200   | 0.139  |     |       |
| HVY  | 1997 | 269 | 0  | 46      | 10.658   | P         | 0.200   | -0.789 |     |       |
| FLL  | 1997 | 269 | 0  | 46      | 9.228    | P         | 0.200   | 0.342  |     |       |
|      |      |     |    |         |          |           |         |        |     |       |
| 1997 | 269  | 9   | 40 | 33.1776 | 43.08400 | 12.81200  | 10.0000 |        | 692 | 0.000 |
| WHP  | 1997 | 269 | 9  | 53      | 28.609   | P         | 0.200   | 0.044  |     |       |
| PDC  | 1997 | 269 | 9  | 53      | 31.002   | P         | 0.200   | -0.992 |     |       |
| CWC  | 1997 | 269 | 9  | 53      | 28.847   | P         | 0.200   | 0.148  |     |       |
| LMC  | 1997 | 269 | 9  | 53      | 30.083   | P         | 0.200   | -0.691 |     |       |
| WMD  | 1997 | 269 | 9  | 53      | 30.874   | P         | 0.200   | 0.056  |     |       |
| TWR2 | 1997 | 269 | 9  | 53      | 29.724   | P         | 0.200   | -0.090 |     |       |
| MLAC | 1997 | 269 | 9  | 53      | 26.461   | P         | 0.200   | 0.713  |     |       |
| DP00 | 1997 | 269 | 9  | 53      | 28.602   | P         | 0.200   | -0.067 |     |       |
| OVY  | 1997 | 269 | 9  | 53      | 28.087   | P         | 0.200   | 0.019  |     |       |
| SLC  | 1997 | 269 | 9  | 53      | 27.655   | P         | 0.200   | 0.008  |     |       |
| BRR  | 1997 | 269 | 9  | 53      | 28.870   | P         | 0.200   | 0.076  |     |       |
| SFT  | 1997 | 269 | 9  | 53      | 29.731   | P         | 0.200   | 0.224  |     |       |
| TIN  | 1997 | 269 | 9  | 53      | 27.095   | P         | 0.200   | 0.487  |     |       |
| HVY  | 1997 | 269 | 9  | 53      | 29.165   | P         | 0.200   | -0.833 |     |       |
| SFK  | 1997 | 269 | 9  | 53      | 30.112   | P         | 0.200   | -0.320 |     |       |
| SRF  | 1997 | 269 | 9  | 53      | 27.203   | P         | 0.200   | 0.124  |     |       |
| FLL  | 1997 | 269 | 9  | 53      | 27.834   | P         | 0.200   | 0.398  |     |       |
| SMD  | 1997 | 269 | 9  | 53      | 28.101   | P         | 0.200   | 0.157  |     |       |
| BPC  | 1997 | 269 | 9  | 53      | 27.219   | P         | 0.200   | 0.223  |     |       |
| CHP  | 1997 | 269 | 9  | 53      | 31.158   | P         | 0.200   | 0.157  |     |       |

|      |      |     |    |         |          |           |         |        |     |       |
|------|------|-----|----|---------|----------|-----------|---------|--------|-----|-------|
| ARC2 | 1997 | 269 | 9  | 53      | 31.203   | P         | 0.200   | 0.161  |     |       |
| CPR  | 1997 | 269 | 9  | 53      | 28.475   | P         | 0.200   | 0.128  |     |       |
| JUN  | 1997 | 269 | 9  | 53      | 28.881   | P         | 0.200   | -0.133 |     |       |
| 1997 | 240  | 11  | 10 | 9.9508  | 57.07500 | -33.84900 | 10.0000 |        | 672 | 0.000 |
| BGR  | 1997 | 240 | 11 | 20      | 0.291    | P         | 0.200   | 0.086  |     |       |
| TIN  | 1997 | 240 | 11 | 19      | 55.310   | P         | 0.200   | 0.246  |     |       |
| TWR2 | 1997 | 240 | 11 | 19      | 59.715   | P         | 0.200   | 0.115  |     |       |
| MLAC | 1997 | 240 | 11 | 19      | 54.595   | P         | 0.200   | 0.252  |     |       |
| SLC  | 1997 | 240 | 11 | 19      | 55.998   | P         | 0.200   | -0.111 |     |       |
| GPO  | 1997 | 240 | 11 | 20      | 0.538    | P         | 0.200   | 0.008  |     |       |
| BPC  | 1997 | 240 | 11 | 19      | 55.494   | P         | 0.200   | -0.130 |     |       |
| JUN  | 1997 | 240 | 11 | 19      | 58.337   | P         | 0.200   | -0.123 |     |       |
| WHP  | 1997 | 240 | 11 | 19      | 57.653   | P         | 0.200   | -0.053 |     |       |
| SRF  | 1997 | 240 | 11 | 19      | 55.245   | P         | 0.200   | -0.202 |     |       |
| HVY  | 1997 | 240 | 11 | 20      | 0.280    | P         | 0.200   | -0.420 |     |       |
| SFK  | 1997 | 240 | 11 | 20      | 0.877    | P         | 0.200   | -0.016 |     |       |
| ARC2 | 1997 | 240 | 11 | 20      | 1.438    | P         | 0.200   | 0.180  |     |       |
| CPR  | 1997 | 240 | 11 | 19      | 57.772   | P         | 0.200   | 0.017  |     |       |
| OVY  | 1997 | 240 | 11 | 19      | 56.968   | P         | 0.200   | -0.161 |     |       |
| SMD  | 1997 | 240 | 11 | 19      | 57.077   | P         | 0.200   | -0.055 |     |       |
| BRR  | 1997 | 240 | 11 | 19      | 59.235   | P         | 0.200   | 0.463  |     |       |
| WMD  | 1997 | 240 | 11 | 20      | 1.310    | P         | 0.200   | 0.202  |     |       |
| CWC  | 1997 | 240 | 11 | 19      | 58.040   | P         | 0.200   | 0.187  |     |       |
| LMC  | 1997 | 240 | 11 | 20      | 1.298    | P         | 0.200   | -0.266 |     |       |
| FLL  | 1997 | 240 | 11 | 19      | 56.903   | P         | 0.200   | 0.126  |     |       |
| DP00 | 1997 | 240 | 11 | 19      | 57.364   | P         | 0.200   | 0.033  |     |       |
| PDC  | 1997 | 240 | 11 | 20      | 2.817    | P         | 0.200   | -0.377 |     |       |
| 1997 | 187  | 5   | 30 | 8.6577  | 47.51100 | -27.50500 | 10.0000 |        | 620 | 0.000 |
| WMD  | 1997 | 187 | 5  | 40      | 49.316   | P         | 0.200   | 0.162  |     |       |
| WHP  | 1997 | 187 | 5  | 40      | 47.828   | P         | 0.200   | 1.769  |     |       |
| CPR  | 1997 | 187 | 5  | 40      | 46.468   | P         | 0.200   | 0.026  |     |       |
| SFT  | 1997 | 187 | 5  | 40      | 48.556   | P         | 0.200   | 1.685  |     |       |
| TWR2 | 1997 | 187 | 5  | 40      | 46.537   | P         | 0.200   | -1.236 |     |       |
| SRF  | 1997 | 187 | 5  | 40      | 43.862   | P         | 0.200   | -0.294 |     |       |
| OVY  | 1997 | 187 | 5  | 40      | 45.625   | P         | 0.200   | -0.105 |     |       |
| HVY  | 1997 | 187 | 5  | 40      | 48.640   | P         | 0.200   | -0.852 |     |       |
| CHP  | 1997 | 187 | 5  | 40      | 48.833   | P         | 0.200   | 0.265  |     |       |
| SMD  | 1997 | 187 | 5  | 40      | 45.875   | P         | 0.200   | -0.165 |     |       |
| BPC  | 1997 | 187 | 5  | 40      | 44.457   | P         | 0.200   | -0.157 |     |       |
| FLL  | 1997 | 187 | 5  | 40      | 46.123   | P         | 0.200   | 0.040  |     |       |
| SFK  | 1997 | 187 | 5  | 40      | 49.128   | P         | 0.200   | -0.047 |     |       |
| BVC  | 1997 | 187 | 5  | 40      | 43.510   | P         | 0.200   | -0.314 |     |       |
| DP00 | 1997 | 187 | 5  | 40      | 45.226   | P         | 0.200   | 0.027  |     |       |
| PDC  | 1997 | 187 | 5  | 40      | 50.660   | P         | 0.200   | -0.510 |     |       |
| BRR  | 1997 | 187 | 5  | 40      | 47.930   | P         | 0.200   | 0.234  |     |       |
| LMC  | 1997 | 187 | 5  | 40      | 49.500   | P         | 0.200   | -0.394 |     |       |
| BGR  | 1997 | 187 | 5  | 40      | 48.727   | P         | 0.200   | -0.136 |     |       |
| 1997 | 178  | 4   | 39 | 54.3207 | 38.33400 | -26.68400 | 10.0000 |        | 612 | 0.000 |
| LMC  | 1997 | 178 | 4  | 51      | 6.904    | P         | 0.200   | -0.423 |     |       |
| DAC  | 1997 | 178 | 4  | 51      | 1.997    | P         | 0.200   | 0.070  |     |       |
| SRF  | 1997 | 178 | 4  | 51      | 1.768    | P         | 0.200   | -0.177 |     |       |
| CWC  | 1997 | 178 | 4  | 51      | 3.586    | P         | 0.200   | 0.281  |     |       |
| MLAC | 1997 | 178 | 4  | 51      | 2.788    | P         | 0.200   | 0.164  |     |       |
| SFT  | 1997 | 178 | 4  | 51      | 4.771    | P         | 0.200   | 0.800  |     |       |
| TWR2 | 1997 | 178 | 4  | 51      | 5.197    | P         | 0.200   | 0.142  |     |       |
| CPR  | 1997 | 178 | 4  | 51      | 3.692    | P         | 0.200   | -0.490 |     |       |
| WHP  | 1997 | 178 | 4  | 51      | 3.574    | P         | 0.200   | 0.037  |     |       |
| PDC  | 1997 | 178 | 4  | 51      | 7.794    | P         | 0.200   | -0.493 |     |       |
| OVY  | 1997 | 178 | 4  | 51      | 3.427    | P         | 0.200   | -0.009 |     |       |
| HVY  | 1997 | 178 | 4  | 51      | 6.748    | P         | 0.200   | -0.588 |     |       |

|      |      |     |   |    |       |   |       |        |
|------|------|-----|---|----|-------|---|-------|--------|
| CHP  | 1997 | 178 | 4 | 51 | 5.782 | P | 0.200 | 0.439  |
| BPC  | 1997 | 178 | 4 | 51 | 2.769 | P | 0.200 | 0.126  |
| BVC  | 1997 | 178 | 4 | 51 | 1.209 | P | 0.200 | -0.155 |
| JUN  | 1997 | 178 | 4 | 51 | 4.388 | P | 0.200 | 0.004  |
| DP00 | 1997 | 178 | 4 | 51 | 2.529 | P | 0.200 | 0.295  |
| BGR  | 1997 | 178 | 4 | 51 | 6.286 | P | 0.200 | -0.285 |
| SMD  | 1997 | 178 | 4 | 51 | 3.929 | P | 0.200 | -0.052 |
| FLL  | 1997 | 178 | 4 | 51 | 4.496 | P | 0.200 | 0.107  |
| WMD  | 1997 | 178 | 4 | 51 | 6.616 | P | 0.200 | 0.289  |
| SFK  | 1997 | 178 | 4 | 51 | 6.492 | P | 0.200 | -0.083 |

|      |     |   |    |         |          |           |         |     |       |
|------|-----|---|----|---------|----------|-----------|---------|-----|-------|
| 1997 | 225 | 7 | 29 | 19.5731 | 38.12300 | -31.45200 | 10.0000 | 662 | 0.000 |
|------|-----|---|----|---------|----------|-----------|---------|-----|-------|

|      |      |     |   |    |        |   |       |        |
|------|------|-----|---|----|--------|---|-------|--------|
| SMD  | 1997 | 225 | 7 | 40 | 9.489  | P | 0.200 | -0.010 |
| OVY  | 1997 | 225 | 7 | 40 | 8.843  | P | 0.200 | -0.026 |
| CPR  | 1997 | 225 | 7 | 40 | 9.624  | P | 0.200 | -0.055 |
| BPC  | 1997 | 225 | 7 | 40 | 8.042  | P | 0.200 | -0.075 |
| CWC  | 1997 | 225 | 7 | 40 | 8.808  | P | 0.200 | 0.168  |
| HVY  | 1997 | 225 | 7 | 40 | 12.061 | P | 0.200 | -0.961 |
| WHP  | 1997 | 225 | 7 | 40 | 8.945  | P | 0.200 | 0.017  |
| SFT  | 1997 | 225 | 7 | 40 | 9.621  | P | 0.200 | 0.332  |
| ARC2 | 1997 | 225 | 7 | 40 | 11.593 | P | 0.200 | 0.209  |
| LMC  | 1997 | 225 | 7 | 40 | 12.566 | P | 0.200 | -0.343 |
| GPO  | 1997 | 225 | 7 | 40 | 9.503  | P | 0.200 | 0.167  |
| SRF  | 1997 | 225 | 7 | 40 | 7.239  | P | 0.200 | -0.078 |
| FLL  | 1997 | 225 | 7 | 40 | 10.073 | P | 0.200 | 0.037  |
| JUN  | 1997 | 225 | 7 | 40 | 9.658  | P | 0.200 | -0.162 |
| TWR2 | 1997 | 225 | 7 | 40 | 10.396 | P | 0.200 | -0.072 |
| SLC  | 1997 | 225 | 7 | 40 | 6.966  | P | 0.200 | 0.166  |
| TIN  | 1997 | 225 | 7 | 40 | 7.550  | P | 0.200 | 0.253  |
| WMD  | 1997 | 225 | 7 | 40 | 12.047 | P | 0.200 | 0.273  |
| MLAC | 1997 | 225 | 7 | 40 | 8.312  | P | 0.200 | 0.048  |
| SFK  | 1997 | 225 | 7 | 40 | 12.099 | P | 0.200 | -0.008 |
| BRR  | 1997 | 225 | 7 | 40 | 11.378 | P | 0.200 | 0.091  |
| PDC  | 1997 | 225 | 7 | 40 | 13.417 | P | 0.200 | -0.417 |
| BGR  | 1997 | 225 | 7 | 40 | 11.967 | P | 0.200 | -0.204 |
| DP00 | 1997 | 225 | 7 | 40 | 7.773  | P | 0.200 | 0.343  |
| DAC  | 1997 | 225 | 7 | 40 | 7.428  | P | 0.200 | 0.308  |

|      |     |    |    |         |          |           |         |     |       |
|------|-----|----|----|---------|----------|-----------|---------|-----|-------|
| 1997 | 209 | 23 | 29 | 22.0036 | 34.56600 | -36.72900 | 10.0000 | 654 | 0.000 |
|------|-----|----|----|---------|----------|-----------|---------|-----|-------|

|      |      |     |    |    |        |   |       |        |
|------|------|-----|----|----|--------|---|-------|--------|
| HVY  | 1997 | 209 | 23 | 40 | 1.550  | P | 0.200 | -0.968 |
| ARC2 | 1997 | 209 | 23 | 40 | 0.646  | P | 0.200 | 0.432  |
| BVC  | 1997 | 209 | 23 | 39 | 55.692 | P | 0.200 | 0.023  |
| CPR  | 1997 | 209 | 23 | 39 | 58.749 | P | 0.200 | -0.214 |
| OVY  | 1997 | 209 | 23 | 39 | 58.023 | P | 0.200 | -0.033 |
| JUN  | 1997 | 209 | 23 | 39 | 58.819 | P | 0.200 | -0.119 |
| BRR  | 1997 | 209 | 23 | 40 | 0.771  | P | 0.200 | -0.021 |
| TWR2 | 1997 | 209 | 23 | 39 | 59.592 | P | 0.200 | 0.119  |
| WHP  | 1997 | 209 | 23 | 39 | 58.094 | P | 0.200 | 0.103  |
| SFK  | 1997 | 209 | 23 | 40 | 1.294  | P | 0.200 | 0.021  |
| BPC  | 1997 | 209 | 23 | 39 | 57.484 | P | 0.200 | -0.015 |
| SRF  | 1997 | 209 | 23 | 39 | 56.422 | P | 0.200 | -0.067 |
| SMD  | 1997 | 209 | 23 | 39 | 58.770 | P | 0.200 | -0.122 |
| LMC  | 1997 | 209 | 23 | 40 | 1.883  | P | 0.200 | -0.258 |
| PDC  | 1997 | 209 | 23 | 40 | 2.608  | P | 0.200 | -0.290 |
| BGR  | 1997 | 209 | 23 | 40 | 1.312  | P | 0.200 | -0.221 |
| WMD  | 1997 | 209 | 23 | 40 | 1.126  | P | 0.200 | 0.364  |
| SLC  | 1997 | 209 | 23 | 39 | 55.958 | P | 0.200 | 0.315  |
| DAC  | 1997 | 209 | 23 | 39 | 56.252 | P | 0.200 | 0.452  |
| DP00 | 1997 | 209 | 23 | 39 | 56.608 | P | 0.200 | 0.499  |

|      |     |   |    |         |          |           |         |     |       |
|------|-----|---|----|---------|----------|-----------|---------|-----|-------|
| 1997 | 217 | 2 | 48 | 46.7600 | 28.39700 | -43.76600 | 10.0000 | 658 | 0.000 |
|------|-----|---|----|---------|----------|-----------|---------|-----|-------|

|     |      |     |   |    |        |   |       |        |
|-----|------|-----|---|----|--------|---|-------|--------|
| PDC | 1997 | 217 | 2 | 59 | 11.132 | P | 0.200 | -0.447 |
| LMC | 1997 | 217 | 2 | 59 | 10.831 | P | 0.200 | -0.323 |

|      |      |     |    |         |          |           |         |        |     |       |
|------|------|-----|----|---------|----------|-----------|---------|--------|-----|-------|
| DP00 | 1997 | 217 | 2  | 59      | 4.814    | P         | 0.200   | 0.415  |     |       |
| WHP  | 1997 | 217 | 2  | 59      | 7.008    | P         | 0.200   | 0.140  |     |       |
| TWR2 | 1997 | 217 | 2  | 59      | 8.262    | P         | 0.200   | 0.075  |     |       |
| TIN  | 1997 | 217 | 2  | 59      | 6.248    | P         | 0.200   | 0.359  |     |       |
| CPR  | 1997 | 217 | 2  | 59      | 8.013    | P         | 0.200   | -0.155 |     |       |
| HVY  | 1997 | 217 | 2  | 59      | 11.103   | P         | 0.200   | -0.867 |     |       |
| CWC  | 1997 | 217 | 2  | 59      | 6.545    | P         | 0.200   | 0.311  |     |       |
| OVY  | 1997 | 217 | 2  | 59      | 7.163    | P         | 0.200   | 0.020  |     |       |
| BPC  | 1997 | 217 | 2  | 59      | 7.052    | P         | 0.200   | 0.107  |     |       |
| SMD  | 1997 | 217 | 2  | 59      | 8.173    | P         | 0.200   | -0.114 |     |       |
| WMD  | 1997 | 217 | 2  | 59      | 9.676    | P         | 0.200   | 0.258  |     |       |
| JUN  | 1997 | 217 | 2  | 59      | 7.858    | P         | 0.200   | -0.011 |     |       |
| SFT  | 1997 | 217 | 2  | 59      | 6.893    | P         | 0.200   | 0.303  |     |       |
| CCC  | 1997 | 217 | 2  | 59      | 9.614    | P         | 0.200   | -0.141 |     |       |
| SRF  | 1997 | 217 | 2  | 59      | 5.668    | P         | 0.200   | 0.049  |     |       |
| FLL  | 1997 | 217 | 2  | 59      | 9.568    | P         | 0.200   | 0.035  |     |       |
| ARC2 | 1997 | 217 | 2  | 59      | 8.763    | P         | 0.200   | 0.164  |     |       |
| SLC  | 1997 | 217 | 2  | 59      | 4.492    | P         | 0.200   | 0.255  |     |       |
| BGR  | 1997 | 217 | 2  | 59      | 10.507   | P         | 0.200   | -0.269 |     |       |
| BRR  | 1997 | 217 | 2  | 59      | 10.293   | P         | 0.200   | -0.024 |     |       |
| SFK  | 1997 | 217 | 2  | 59      | 10.056   | P         | 0.200   | -0.140 |     |       |
|      |      |     |    |         |          |           |         |        |     |       |
| 1997 | 269  | 18  | 37 | 30.2587 | 24.88600 | -45.76400 | 10.0000 |        | 696 | 0.000 |
| LMC  | 1997 | 269 | 18 | 47      | 55.197   | P         | 0.200   | -0.362 |     |       |
| WHP  | 1997 | 269 | 18 | 47      | 51.217   | P         | 0.200   | -0.105 |     |       |
| CPR  | 1997 | 269 | 18 | 47      | 53.961   | P         | 0.200   | 1.204  |     |       |
| HVY  | 1997 | 269 | 18 | 47      | 56.377   | P         | 0.200   | -0.196 |     |       |
| CWC  | 1997 | 269 | 18 | 47      | 50.715   | P         | 0.200   | 0.115  |     |       |
| TWR2 | 1997 | 269 | 18 | 47      | 52.367   | P         | 0.200   | -0.166 |     |       |
| TIN  | 1997 | 269 | 18 | 47      | 50.847   | P         | 0.200   | 0.278  |     |       |
| BPC  | 1997 | 269 | 18 | 47      | 51.756   | P         | 0.200   | 0.069  |     |       |
| CCC  | 1997 | 269 | 18 | 47      | 53.769   | P         | 0.200   | -0.477 |     |       |
| JUN  | 1997 | 269 | 18 | 47      | 52.130   | P         | 0.200   | -0.203 |     |       |
| SFT  | 1997 | 269 | 18 | 47      | 51.154   | P         | 0.200   | 0.306  |     |       |
| ARC2 | 1997 | 269 | 18 | 47      | 52.838   | P         | 0.200   | 0.076  |     |       |
| PDC  | 1997 | 269 | 18 | 47      | 55.280   | P         | 0.200   | -0.532 |     |       |
| SRF  | 1997 | 269 | 18 | 47      | 50.246   | P         | 0.200   | 0.021  |     |       |
| SLC  | 1997 | 269 | 18 | 47      | 48.773   | P         | 0.200   | 0.157  |     |       |
| DP00 | 1997 | 269 | 18 | 47      | 48.904   | P         | 0.200   | 0.283  |     |       |
| WMD  | 1997 | 269 | 18 | 47      | 53.819   | P         | 0.200   | 0.107  |     |       |
| BRR  | 1997 | 269 | 18 | 47      | 54.691   | P         | 0.200   | -0.314 |     |       |
| FLL  | 1997 | 269 | 18 | 47      | 54.247   | P         | 0.200   | -0.144 |     |       |
| CHP  | 1997 | 269 | 18 | 47      | 51.766   | P         | 0.200   | 0.224  |     |       |
| MKW3 | 1997 | 269 | 18 | 47      | 53.383   | P         | 0.200   | -0.167 |     |       |
| SFK  | 1997 | 269 | 18 | 47      | 54.406   | P         | 0.200   | -0.174 |     |       |
|      |      |     |    |         |          |           |         |        |     |       |
| 1997 | 201  | 17  | 43 | 51.8465 | 19.05500 | -46.09300 | 10.0000 |        | 641 | 0.000 |
| SFK  | 1997 | 201 | 17 | 54      | 34.082   | P         | 0.200   | 0.035  |     |       |
| HVY  | 1997 | 201 | 17 | 54      | 35.158   | P         | 0.200   | -1.085 |     |       |
| OVY  | 1997 | 201 | 17 | 54      | 31.425   | P         | 0.200   | -0.077 |     |       |
| SFT  | 1997 | 201 | 17 | 54      | 30.743   | P         | 0.200   | 0.454  |     |       |
| FLL  | 1997 | 201 | 17 | 54      | 34.384   | P         | 0.200   | -0.076 |     |       |
| JUN  | 1997 | 201 | 17 | 54      | 31.985   | P         | 0.200   | 0.007  |     |       |
| TWR2 | 1997 | 201 | 17 | 54      | 32.064   | P         | 0.200   | 0.040  |     |       |
| ARC2 | 1997 | 201 | 17 | 54      | 32.405   | P         | 0.200   | 0.373  |     |       |
| BGR  | 1997 | 201 | 17 | 54      | 34.700   | P         | 0.200   | -0.222 |     |       |
| LMC  | 1997 | 201 | 17 | 54      | 34.802   | P         | 0.200   | -0.215 |     |       |
| PDC  | 1997 | 201 | 17 | 54      | 34.766   | P         | 0.200   | -0.277 |     |       |
| BRR  | 1997 | 201 | 17 | 54      | 34.623   | P         | 0.200   | -0.209 |     |       |
| BVC  | 1997 | 201 | 17 | 54      | 28.980   | P         | 0.200   | 0.211  |     |       |
| DP00 | 1997 | 201 | 17 | 54      | 28.652   | P         | 0.200   | 0.554  |     |       |
| SLC  | 1997 | 201 | 17 | 54      | 28.593   | P         | 0.200   | 0.298  |     |       |
| SRF  | 1997 | 201 | 17 | 54      | 30.320   | P         | 0.200   | 0.190  |     |       |



|      |      |     |    |         |          |           |         |        |       |
|------|------|-----|----|---------|----------|-----------|---------|--------|-------|
| 1997 | 277  | 15  | 29 | 49.4459 | 15.92200 | -46.64600 | 10.0000 | 706    | 0.000 |
| OVY  | 1997 | 277 | 15 | 40      | 37.103   | P         | 0.200   | -0.126 |       |
| BPC  | 1997 | 277 | 15 | 40      | 37.486   | P         | 0.200   | -0.072 |       |
| TIN  | 1997 | 277 | 15 | 40      | 36.727   | P         | 0.200   | 0.368  |       |
| MLAC | 1997 | 277 | 15 | 40      | 39.761   | P         | 0.200   | 0.257  |       |
| SMD  | 1997 | 277 | 15 | 40      | 38.202   | P         | 0.200   | -0.409 |       |
| JUN  | 1997 | 277 | 15 | 40      | 37.586   | P         | 0.200   | -0.036 |       |
| CPR  | 1997 | 277 | 15 | 40      | 38.073   | P         | 0.200   | -0.182 |       |
| TWR2 | 1997 | 277 | 15 | 40      | 37.731   | P         | 0.200   | 0.146  |       |
| CCC  | 1997 | 277 | 15 | 40      | 39.373   | P         | 0.200   | -0.122 |       |
| FLL  | 1997 | 277 | 15 | 40      | 40.161   | P         | 0.200   | -0.164 |       |
| PDC  | 1997 | 277 | 15 | 40      | 40.138   | P         | 0.200   | -0.326 |       |
| HVY  | 1997 | 277 | 15 | 40      | 40.864   | P         | 0.200   | -1.025 |       |
| WHP  | 1997 | 277 | 15 | 40      | 36.756   | P         | 0.200   | 0.109  |       |
| CWC  | 1997 | 277 | 15 | 40      | 36.165   | P         | 0.200   | 0.365  |       |
| SRF  | 1997 | 277 | 15 | 40      | 36.018   | P         | 0.200   | 0.103  |       |
| BGR  | 1997 | 277 | 15 | 40      | 40.337   | P         | 0.200   | -0.209 |       |
| ARC2 | 1997 | 277 | 15 | 40      | 37.750   | P         | 0.200   | 0.278  |       |
| BRR  | 1997 | 277 | 15 | 40      | 40.263   | P         | 0.200   | -0.310 |       |
| SFK  | 1997 | 277 | 15 | 40      | 39.583   | P         | 0.200   | -0.010 |       |
| DAC  | 1997 | 277 | 15 | 40      | 33.677   | P         | 0.200   | 0.320  |       |
| SLC  | 1997 | 277 | 15 | 40      | 34.210   | P         | 0.200   | 0.247  |       |
| DP00 | 1997 | 277 | 15 | 40      | 34.177   | P         | 0.200   | 0.520  |       |
| CHP  | 1997 | 277 | 15 | 40      | 36.433   | P         | 0.200   | 0.277  |       |
|      |      |     |    |         |          |           |         |        |       |
| 1997 | 203  | 19  | 10 | 37.9005 | 4.61900  | -32.68800 | 10.0000 | 644    | 0.000 |
| CCC  | 1997 | 203 | 19 | 23      | 9.767    | P         | 0.200   | -0.003 |       |
| SLC  | 1997 | 203 | 19 | 23      | 5.628    | P         | 0.200   | 0.275  |       |
| DAC  | 1997 | 203 | 19 | 23      | 5.331    | P         | 0.200   | 0.529  |       |
| BPC  | 1997 | 203 | 19 | 23      | 8.304    | P         | 0.200   | -0.011 |       |
| FLL  | 1997 | 203 | 19 | 23      | 10.381   | P         | 0.200   | -0.129 |       |
| TWR2 | 1997 | 203 | 19 | 23      | 8.436    | P         | 0.200   | 0.252  |       |
| SRF  | 1997 | 203 | 19 | 23      | 7.196    | P         | 0.200   | 0.219  |       |
| BRR  | 1997 | 203 | 19 | 23      | 10.450   | P         | 0.200   | -0.148 |       |
| HVY  | 1997 | 203 | 19 | 23      | 10.638   | P         | 0.200   | -0.968 |       |
| JUN  | 1997 | 203 | 19 | 23      | 8.280    | P         | 0.200   | 0.022  |       |
| ARC2 | 1997 | 203 | 19 | 23      | 8.466    | P         | 0.200   | 0.357  |       |
| CPR  | 1997 | 203 | 19 | 23      | 8.680    | P         | 0.200   | -0.074 |       |
| SMD  | 1997 | 203 | 19 | 23      | 8.882    | P         | 0.200   | -0.234 |       |
| SFT  | 1997 | 203 | 19 | 23      | 7.230    | P         | 0.200   | 0.462  |       |
| WHP  | 1997 | 203 | 19 | 23      | 7.602    | P         | 0.200   | 0.113  |       |
| PDC  | 1997 | 203 | 19 | 23      | 9.969    | P         | 0.200   | -0.425 |       |
| OVY  | 1997 | 203 | 19 | 23      | 7.920    | P         | 0.200   | -0.100 |       |
| DP00 | 1997 | 203 | 19 | 23      | 5.579    | P         | 0.200   | 0.482  |       |
| SFK  | 1997 | 203 | 19 | 23      | 9.657    | P         | 0.200   | -0.117 |       |
| LMC  | 1997 | 203 | 19 | 23      | 10.033   | P         | 0.200   | -0.449 |       |
| BVC  | 1997 | 203 | 19 | 23      | 5.964    | P         | 0.200   | 0.240  |       |
| BGR  | 1997 | 203 | 19 | 23      | 10.246   | P         | 0.200   | -0.293 |       |
|      |      |     |    |         |          |           |         |        |       |
| 1997 | 190  | 19  | 24 | 16.0071 | 10.59800 | -63.48600 | 19.9000 | 629    | 0.000 |
| LMC  | 1997 | 190 | 19 | 33      | 54.295   | P         | 0.200   | -0.086 |       |
| BPC  | 1997 | 190 | 19 | 33      | 52.799   | P         | 0.200   | 0.203  |       |
| SMD  | 1997 | 190 | 19 | 33      | 53.348   | P         | 0.200   | 0.003  |       |
| SFT  | 1997 | 190 | 19 | 33      | 49.039   | P         | 0.200   | 0.077  |       |
| BRR  | 1997 | 190 | 19 | 33      | 55.331   | P         | 0.200   | -0.137 |       |
| FLL  | 1997 | 190 | 19 | 33      | 55.704   | P         | 0.200   | -0.149 |       |
| CPR  | 1997 | 190 | 19 | 33      | 52.807   | P         | 0.200   | 0.078  |       |
| OVY  | 1997 | 190 | 19 | 33      | 51.590   | P         | 0.200   | 0.026  |       |
| SLC  | 1997 | 190 | 19 | 33      | 47.682   | P         | 0.200   | 0.106  |       |
| BGR  | 1997 | 190 | 19 | 33      | 54.650   | P         | 0.200   | -0.166 |       |
| BVC  | 1997 | 190 | 19 | 33      | 48.695   | P         | 0.200   | 0.255  |       |
| SFK  | 1997 | 190 | 19 | 33      | 53.401   | P         | 0.200   | 0.084  |       |

|      |      |     |    |    |         |          |           |         |     |       |
|------|------|-----|----|----|---------|----------|-----------|---------|-----|-------|
| CWC  | 1997 | 190 | 19 | 33 | 49.635  | P        | 0.200     | 0.252   |     |       |
| JUN  | 1997 | 190 | 19 | 33 | 51.780  | P        | 0.200     | 0.192   |     |       |
| SRF  | 1997 | 190 | 19 | 33 | 50.465  | P        | 0.200     | 0.068   |     |       |
| HVY  | 1997 | 190 | 19 | 33 | 55.636  | P        | 0.200     | -0.856  |     |       |
| WMD  | 1997 | 190 | 19 | 33 | 52.233  | P        | 0.200     | 0.253   |     |       |
| ARC2 | 1997 | 190 | 19 | 33 | 50.409  | P        | 0.200     | 0.102   |     |       |
| TWR2 | 1997 | 190 | 19 | 33 | 50.330  | P        | 0.200     | -0.785  |     |       |
| DP00 | 1997 | 190 | 19 | 33 | 46.912  | P        | 0.200     | 0.294   |     |       |
| WHP  | 1997 | 190 | 19 | 33 | 50.678  | P        | 0.200     | 0.160   |     |       |
| PDC  | 1997 | 190 | 19 | 33 | 53.652  | P        | 0.200     | 0.025   |     |       |
|      |      |     |    |    |         |          |           |         |     |       |
| 1997 | 187  | 20  | 13 |    | 40.5354 | 16.15700 | -87.91700 | 33.0000 | 622 | 0.000 |
| JUN  | 1997 | 187 | 20 | 20 | 20.022  | P        | 0.200     | -0.020  |     |       |
| CWC  | 1997 | 187 | 20 | 20 | 17.311  | P        | 0.200     | 0.001   |     |       |
| SFK  | 1997 | 187 | 20 | 20 | 21.598  | P        | 0.200     | 0.166   |     |       |
| TWR2 | 1997 | 187 | 20 | 20 | 18.035  | P        | 0.200     | -0.950  |     |       |
| OVY  | 1997 | 187 | 20 | 20 | 20.548  | P        | 0.200     | 0.093   |     |       |
| SMD  | 1997 | 187 | 20 | 20 | 23.042  | P        | 0.200     | 0.156   |     |       |
| BVC  | 1997 | 187 | 20 | 20 | 17.116  | P        | 0.200     | 0.096   |     |       |
| BPC  | 1997 | 187 | 20 | 20 | 22.660  | P        | 0.200     | 0.219   |     |       |
| SRF  | 1997 | 187 | 20 | 20 | 19.935  | P        | 0.200     | 0.310   |     |       |
| FLL  | 1997 | 187 | 20 | 20 | 26.452  | P        | 0.200     | 0.108   |     |       |
| HVY  | 1997 | 187 | 20 | 20 | 25.176  | P        | 0.200     | -0.571  |     |       |
| BGR  | 1997 | 187 | 20 | 20 | 23.962  | P        | 0.200     | 0.275   |     |       |
| LMC  | 1997 | 187 | 20 | 20 | 22.636  | P        | 0.200     | 0.061   |     |       |
| WHP  | 1997 | 187 | 20 | 20 | 18.951  | P        | 0.200     | 0.079   |     |       |
| CPR  | 1997 | 187 | 20 | 20 | 22.029  | P        | 0.200     | 0.208   |     |       |
| CHP  | 1997 | 187 | 20 | 20 | 15.046  | P        | 0.200     | -0.183  |     |       |
| PDC  | 1997 | 187 | 20 | 20 | 20.960  | P        | 0.200     | -0.051  |     |       |
|      |      |     |    |    |         |          |           |         |     |       |
| 1997 | 227  | 7   | 35 |    | 35.7982 | 8.64800  | -82.90000 | 33.0000 | 664 | 0.000 |
| SLC  | 1997 | 227 | 7  | 43 | 24.454  | P        | 0.200     | -0.161  |     |       |
| GPO  | 1997 | 227 | 7  | 43 | 20.323  | P        | 0.200     | -0.090  |     |       |
| BRR  | 1997 | 227 | 7  | 43 | 33.758  | P        | 0.200     | 0.284   |     |       |
| CPR  | 1997 | 227 | 7  | 43 | 30.464  | P        | 0.200     | -0.022  |     |       |
| DP00 | 1997 | 227 | 7  | 43 | 22.798  | P        | 0.200     | -0.247  |     |       |
| BGR  | 1997 | 227 | 7  | 43 | 32.130  | P        | 0.200     | 0.041   |     |       |
| WMD  | 1997 | 227 | 7  | 43 | 28.403  | P        | 0.200     | 0.276   |     |       |
| SMD  | 1997 | 227 | 7  | 43 | 31.461  | P        | 0.200     | -0.098  |     |       |
| CWC  | 1997 | 227 | 7  | 43 | 26.288  | P        | 0.200     | 0.070   |     |       |
| SRF  | 1997 | 227 | 7  | 43 | 28.793  | P        | 0.200     | 0.216   |     |       |
| HVY  | 1997 | 227 | 7  | 43 | 33.192  | P        | 0.200     | -0.815  |     |       |
| OVY  | 1997 | 227 | 7  | 43 | 29.270  | P        | 0.200     | 0.009   |     |       |
| TWR2 | 1997 | 227 | 7  | 43 | 27.868  | P        | 0.200     | 0.172   |     |       |
| WHP  | 1997 | 227 | 7  | 43 | 27.814  | P        | 0.200     | 0.107   |     |       |
| PDC  | 1997 | 227 | 7  | 43 | 29.521  | P        | 0.200     | 0.173   |     |       |
| SFK  | 1997 | 227 | 7  | 43 | 30.100  | P        | 0.200     | 0.192   |     |       |
| FLL  | 1997 | 227 | 7  | 43 | 34.754  | P        | 0.200     | -0.092  |     |       |
| LMC  | 1997 | 227 | 7  | 43 | 30.914  | P        | 0.200     | -0.013  |     |       |
| JUN  | 1997 | 227 | 7  | 43 | 28.778  | P        | 0.200     | -0.002  |     |       |
|      |      |     |    |    |         |          |           |         |     |       |
| 1997 | 250  | 2   | 46 |    | 3.4154  | 2.62600  | -79.82100 | 10.0000 | 682 | 0.000 |
| CPR  | 1997 | 250 | 2  | 54 | 52.354  | P        | 0.200     | -0.141  |     |       |
| SFK  | 1997 | 250 | 2  | 54 | 51.961  | P        | 0.200     | 0.184   |     |       |
| MKW3 | 1997 | 250 | 2  | 54 | 51.326  | P        | 0.200     | -0.019  |     |       |
| WHP  | 1997 | 250 | 2  | 54 | 49.908  | P        | 0.200     | 0.039   |     |       |
| SMD  | 1997 | 250 | 2  | 54 | 53.482  | P        | 0.200     | -0.072  |     |       |
| BRR  | 1997 | 250 | 2  | 54 | 55.391  | P        | 0.200     | 0.119   |     |       |
| WMD  | 1997 | 250 | 2  | 54 | 50.415  | P        | 0.200     | 0.303   |     |       |
| CCC  | 1997 | 250 | 2  | 54 | 52.628  | P        | 0.200     | -0.058  |     |       |
| DP00 | 1997 | 250 | 2  | 54 | 45.196  | P        | 0.200     | -0.282  |     |       |
| JUN  | 1997 | 250 | 2  | 54 | 50.785  | P        | 0.200     | -0.078  |     |       |
| TWR2 | 1997 | 250 | 2  | 54 | 49.866  | P        | 0.200     | 0.093   |     |       |

|     |      |     |   |    |        |   |       |        |
|-----|------|-----|---|----|--------|---|-------|--------|
| CHP | 1997 | 250 | 2 | 54 | 46.218 | P | 0.200 | -0.030 |
| FLL | 1997 | 250 | 2 | 54 | 56.579 | P | 0.200 | -0.099 |
| LMC | 1997 | 250 | 2 | 54 | 52.575 | P | 0.200 | -0.123 |
| PDC | 1997 | 250 | 2 | 54 | 51.286 | P | 0.200 | 0.166  |

|      |     |    |   |         |          |           |         |     |       |
|------|-----|----|---|---------|----------|-----------|---------|-----|-------|
| 1997 | 265 | 12 | 6 | 30.8419 | 14.43800 | -93.07500 | 33.0000 | 689 | 0.000 |
|------|-----|----|---|---------|----------|-----------|---------|-----|-------|

|      |      |     |    |    |        |   |       |        |
|------|------|-----|----|----|--------|---|-------|--------|
| CHP  | 1997 | 265 | 12 | 12 | 45.058 | P | 0.200 | -0.180 |
| WMD  | 1997 | 265 | 12 | 12 | 49.660 | P | 0.200 | 0.030  |
| CWC  | 1997 | 265 | 12 | 12 | 48.031 | P | 0.200 | 0.070  |
| PDC  | 1997 | 265 | 12 | 12 | 50.939 | P | 0.200 | 0.209  |
| SMD  | 1997 | 265 | 12 | 12 | 53.801 | P | 0.200 | -0.128 |
| SFK  | 1997 | 265 | 12 | 12 | 51.851 | P | 0.200 | 0.231  |
| TWR2 | 1997 | 265 | 12 | 12 | 49.578 | P | 0.200 | 0.206  |
| ARC2 | 1997 | 265 | 12 | 12 | 47.093 | P | 0.200 | -0.172 |
| MLAC | 1997 | 265 | 12 | 12 | 59.041 | P | 0.200 | 0.410  |
| SFT  | 1997 | 265 | 12 | 12 | 46.549 | P | 0.200 | -0.202 |
| SLC  | 1997 | 265 | 12 | 12 | 46.083 | P | 0.200 | -0.370 |
| TIN  | 1997 | 265 | 12 | 12 | 52.556 | P | 0.200 | 0.523  |
| MKW3 | 1997 | 265 | 12 | 12 | 51.195 | P | 0.200 | 0.075  |
| DP00 | 1997 | 265 | 12 | 12 | 44.295 | P | 0.200 | -0.330 |
| BPC  | 1997 | 265 | 12 | 12 | 53.957 | P | 0.200 | 0.219  |
| FLL  | 1997 | 265 | 12 | 12 | 57.696 | P | 0.200 | 0.157  |
| BRR  | 1997 | 265 | 12 | 12 | 56.106 | P | 0.200 | 0.324  |
| OVY  | 1997 | 265 | 12 | 12 | 51.237 | P | 0.200 | -0.137 |
| JUN  | 1997 | 265 | 12 | 12 | 50.585 | P | 0.200 | -0.118 |
| CPR  | 1997 | 265 | 12 | 12 | 52.611 | P | 0.200 | -0.042 |
| SRF  | 1997 | 265 | 12 | 12 | 50.979 | P | 0.200 | 0.094  |
| LMC  | 1997 | 265 | 12 | 12 | 52.724 | P | 0.200 | 0.065  |
| HVY  | 1997 | 265 | 12 | 12 | 55.506 | P | 0.200 | -0.630 |
| WHP  | 1997 | 265 | 12 | 12 | 49.622 | P | 0.200 | -0.001 |
| GPO  | 1997 | 265 | 12 | 12 | 41.008 | P | 0.200 | -0.304 |

|      |     |    |    |         |           |           |          |     |        |
|------|-----|----|----|---------|-----------|-----------|----------|-----|--------|
| 1997 | 201 | 10 | 14 | 25.0288 | -22.98200 | -66.30100 | 256.1000 | 640 | -0.006 |
|------|-----|----|----|---------|-----------|-----------|----------|-----|--------|

|      |      |     |    |    |        |   |       |        |
|------|------|-----|----|----|--------|---|-------|--------|
| BRR  | 1997 | 201 | 10 | 25 | 52.771 | P | 0.200 | -0.254 |
| CPR  | 1997 | 201 | 10 | 25 | 51.169 | P | 0.200 | 0.047  |
| LMC  | 1997 | 201 | 10 | 25 | 50.267 | P | 0.200 | -0.508 |
| TIN  | 1997 | 201 | 10 | 25 | 51.383 | P | 0.200 | 0.560  |
| GPO  | 1997 | 201 | 10 | 25 | 43.695 | P | 0.200 | -0.106 |
| HVY  | 1997 | 201 | 10 | 25 | 51.737 | P | 0.200 | -1.298 |
| BPC  | 1997 | 201 | 10 | 25 | 52.112 | P | 0.200 | 0.033  |
| CWC  | 1997 | 201 | 10 | 25 | 48.410 | P | 0.200 | 0.227  |
| CCC  | 1997 | 201 | 10 | 25 | 51.014 | P | 0.200 | -0.095 |
| TWR2 | 1997 | 201 | 10 | 25 | 49.216 | P | 0.200 | 0.240  |
| FLL  | 1997 | 201 | 10 | 25 | 53.985 | P | 0.200 | -0.297 |
| WHP  | 1997 | 201 | 10 | 25 | 49.431 | P | 0.200 | 0.192  |
| SFK  | 1997 | 201 | 10 | 25 | 50.129 | P | 0.200 | -0.076 |
| JUN  | 1997 | 201 | 10 | 25 | 49.980 | P | 0.200 | 0.066  |
| SMD  | 1997 | 201 | 10 | 25 | 52.088 | P | 0.200 | 0.074  |
| OVY  | 1997 | 201 | 10 | 25 | 50.533 | P | 0.200 | 0.075  |
| SRF  | 1997 | 201 | 10 | 25 | 50.289 | P | 0.200 | 0.061  |
| BGR  | 1997 | 201 | 10 | 25 | 51.511 | P | 0.200 | -0.329 |
| SLC  | 1997 | 201 | 10 | 25 | 47.473 | P | 0.200 | 0.133  |
| DP00 | 1997 | 201 | 10 | 25 | 46.252 | P | 0.200 | 0.090  |
| ARC2 | 1997 | 201 | 10 | 25 | 47.905 | P | 0.200 | 0.333  |
| DAC  | 1997 | 201 | 10 | 25 | 46.032 | P | 0.200 | 0.117  |
| PDC  | 1997 | 201 | 10 | 25 | 49.309 | P | 0.200 | -0.131 |
| GSC  | 1997 | 201 | 10 | 25 | 39.867 | P | 0.200 | 0.279  |
| SFT  | 1997 | 201 | 10 | 25 | 47.670 | P | 0.200 | 0.323  |
| BVC  | 1997 | 201 | 10 | 25 | 48.509 | P | 0.200 | 0.244  |

|      |     |    |    |         |           |           |          |     |       |
|------|-----|----|----|---------|-----------|-----------|----------|-----|-------|
| 1997 | 271 | 23 | 13 | 16.3305 | -22.40700 | -68.44900 | 106.8000 | 700 | 0.000 |
|------|-----|----|----|---------|-----------|-----------|----------|-----|-------|

|     |      |     |    |    |        |   |       |        |
|-----|------|-----|----|----|--------|---|-------|--------|
| PDC | 1997 | 271 | 23 | 24 | 47.228 | P | 0.200 | -0.143 |
| HVY | 1997 | 271 | 23 | 24 | 49.810 | P | 0.200 | -1.296 |

|      |      |     |    |    |        |   |       |        |
|------|------|-----|----|----|--------|---|-------|--------|
| GPO  | 1997 | 271 | 23 | 24 | 41.479 | P | 0.200 | -0.110 |
| MLAC | 1997 | 271 | 23 | 24 | 53.501 | P | 0.200 | 0.209  |
| LMC  | 1997 | 271 | 23 | 24 | 48.204 | P | 0.200 | -0.565 |
| OVY  | 1997 | 271 | 23 | 24 | 48.626 | P | 0.200 | 0.106  |
| CHP  | 1997 | 271 | 23 | 24 | 44.365 | P | 0.200 | 0.195  |
| WHP  | 1997 | 271 | 23 | 24 | 47.481 | P | 0.200 | 0.226  |
| SFK  | 1997 | 271 | 23 | 24 | 48.109 | P | 0.200 | -0.083 |
| TIN  | 1997 | 271 | 23 | 24 | 49.429 | P | 0.200 | 0.505  |
| TWR2 | 1997 | 271 | 23 | 24 | 47.126 | P | 0.200 | 0.171  |
| CCC  | 1997 | 271 | 23 | 24 | 49.036 | P | 0.200 | -0.101 |
| CWC  | 1997 | 271 | 23 | 24 | 46.424 | P | 0.200 | 0.260  |
| JUN  | 1997 | 271 | 23 | 24 | 47.937 | P | 0.200 | 0.001  |
| BGR  | 1997 | 271 | 23 | 24 | 49.552 | P | 0.200 | -0.334 |
| WMD  | 1997 | 271 | 23 | 24 | 47.397 | P | 0.200 | 0.317  |
| SMD  | 1997 | 271 | 23 | 24 | 50.183 | P | 0.200 | 0.067  |
| DP00 | 1997 | 271 | 23 | 24 | 44.113 | P | 0.200 | 0.035  |
| BPC  | 1997 | 271 | 23 | 24 | 50.231 | P | 0.200 | 0.032  |
| CPR  | 1997 | 271 | 23 | 24 | 49.177 | P | 0.200 | -0.009 |
| SFT  | 1997 | 271 | 23 | 24 | 45.541 | P | 0.200 | 0.262  |
| BRR  | 1997 | 271 | 23 | 24 | 50.872 | P | 0.200 | -0.250 |
| ARC2 | 1997 | 271 | 23 | 24 | 45.792 | P | 0.200 | 0.323  |
| SLC  | 1997 | 271 | 23 | 24 | 45.391 | P | 0.200 | 0.082  |
| SRF  | 1997 | 271 | 23 | 24 | 48.406 | P | 0.200 | 0.099  |

|      |     |    |    |         |           |           |         |     |       |
|------|-----|----|----|---------|-----------|-----------|---------|-----|-------|
| 1997 | 191 | 14 | 55 | 51.3833 | -22.73300 | -70.89400 | 33.0000 | 630 | 0.000 |
|------|-----|----|----|---------|-----------|-----------|---------|-----|-------|

|      |      |     |    |   |        |   |       |        |
|------|------|-----|----|---|--------|---|-------|--------|
| SFT  | 1997 | 191 | 15 | 7 | 22.274 | P | 0.200 | 0.327  |
| CPR  | 1997 | 191 | 15 | 7 | 26.210 | P | 0.200 | 0.254  |
| BGR  | 1997 | 191 | 15 | 7 | 26.276 | P | 0.200 | -0.327 |
| BRR  | 1997 | 191 | 15 | 7 | 27.658 | P | 0.200 | -0.251 |
| OVY  | 1997 | 191 | 15 | 7 | 25.368 | P | 0.200 | 0.073  |
| LMC  | 1997 | 191 | 15 | 7 | 25.017 | P | 0.200 | -0.407 |
| TWR2 | 1997 | 191 | 15 | 7 | 22.768 | P | 0.200 | -0.856 |
| BPC  | 1997 | 191 | 15 | 7 | 27.196 | P | 0.200 | 0.142  |
| SMD  | 1997 | 191 | 15 | 7 | 27.053 | P | 0.200 | 0.125  |
| JUN  | 1997 | 191 | 15 | 7 | 24.780 | P | 0.200 | 0.120  |
| SRF  | 1997 | 191 | 15 | 7 | 25.294 | P | 0.200 | 0.164  |
| DP00 | 1997 | 191 | 15 | 7 | 20.878 | P | 0.200 | 0.103  |
| ARC2 | 1997 | 191 | 15 | 7 | 22.412 | P | 0.200 | 0.343  |
| BVC  | 1997 | 191 | 15 | 7 | 23.379 | P | 0.200 | 0.301  |
| WMD  | 1997 | 191 | 15 | 7 | 24.047 | P | 0.200 | 0.342  |
| WHP  | 1997 | 191 | 15 | 7 | 24.236 | P | 0.200 | 0.244  |
| SFK  | 1997 | 191 | 15 | 7 | 24.884 | P | 0.200 | 0.034  |
| SLC  | 1997 | 191 | 15 | 7 | 22.209 | P | 0.200 | 0.157  |
| CWC  | 1997 | 191 | 15 | 7 | 23.153 | P | 0.200 | 0.282  |
| PDC  | 1997 | 191 | 15 | 7 | 23.921 | P | 0.200 | -0.026 |
| HVY  | 1997 | 191 | 15 | 7 | 26.691 | P | 0.200 | -1.143 |

|      |     |    |    |         |           |           |         |     |       |
|------|-----|----|----|---------|-----------|-----------|---------|-----|-------|
| 1997 | 200 | 12 | 22 | 59.6375 | -29.28100 | -71.68400 | 26.4000 | 637 | 0.000 |
|------|-----|----|----|---------|-----------|-----------|---------|-----|-------|

|      |      |     |    |    |        |   |       |        |
|------|------|-----|----|----|--------|---|-------|--------|
| ARC2 | 1997 | 200 | 12 | 34 | 58.461 | P | 0.200 | 0.413  |
| GPO  | 1997 | 200 | 12 | 34 | 54.350 | P | 0.200 | -0.071 |
| CCC  | 1997 | 200 | 12 | 35 | 1.626  | P | 0.200 | -0.022 |
| CPR  | 1997 | 200 | 12 | 35 | 1.885  | P | 0.200 | 0.028  |
| WHP  | 1997 | 200 | 12 | 35 | 0.316  | P | 0.200 | 0.257  |
| OVY  | 1997 | 200 | 12 | 35 | 1.356  | P | 0.200 | 0.037  |
| PDC  | 1997 | 200 | 12 | 34 | 59.618 | P | 0.200 | 0.000  |
| BRR  | 1997 | 200 | 12 | 35 | 3.374  | P | 0.200 | -0.223 |
| SRF  | 1997 | 200 | 12 | 35 | 1.392  | P | 0.200 | 0.112  |
| DAC  | 1997 | 200 | 12 | 34 | 57.022 | P | 0.200 | 0.149  |
| SFT  | 1997 | 200 | 12 | 34 | 58.361 | P | 0.200 | 0.291  |
| BVC  | 1997 | 200 | 12 | 34 | 59.581 | P | 0.200 | 0.275  |
| SFK  | 1997 | 200 | 12 | 35 | 0.676  | P | 0.200 | 0.058  |
| DP00 | 1997 | 200 | 12 | 34 | 57.264 | P | 0.200 | 0.163  |
| HVY  | 1997 | 200 | 12 | 35 | 2.227  | P | 0.200 | -1.155 |

|      |      |     |    |         |           |            |         |        |     |       |
|------|------|-----|----|---------|-----------|------------|---------|--------|-----|-------|
| LMC  | 1997 | 200 | 12 | 35      | 0.659     | P          | 0.200   | -0.434 |     |       |
| SLC  | 1997 | 200 | 12 | 34      | 58.470    | P          | 0.200   | 0.127  |     |       |
| SMD  | 1997 | 200 | 12 | 35      | 2.860     | P          | 0.200   | 0.046  |     |       |
| TWR2 | 1997 | 200 | 12 | 34      | 59.850    | P          | 0.200   | 0.260  |     |       |
| BPC  | 1997 | 200 | 12 | 35      | 3.152     | P          | 0.200   | 0.101  |     |       |
| FLL  | 1997 | 200 | 12 | 35      | 4.893     | P          | 0.200   | -0.157 |     |       |
| BGR  | 1997 | 200 | 12 | 35      | 1.889     | P          | 0.200   | -0.392 |     |       |
| JUN  | 1997 | 200 | 12 | 35      | 0.771     | P          | 0.200   | 0.137  |     |       |
|      |      |     |    |         |           |            |         |        |     |       |
| 1997 | 187  | 9   | 54 | 3.3879  | -30.05800 | -71.87200  | 19.0000 |        | 621 | 0.000 |
| JUN  | 1997 | 187 | 10 | 6       | 8.381     | P          | 0.200   | 0.035  |     |       |
| CPR  | 1997 | 187 | 10 | 6       | 9.637     | P          | 0.200   | 0.073  |     |       |
| TWR2 | 1997 | 187 | 10 | 6       | 6.459     | P          | 0.200   | -0.840 |     |       |
| FLL  | 1997 | 187 | 10 | 6       | 12.577    | P          | 0.200   | -0.157 |     |       |
| OVY  | 1997 | 187 | 10 | 6       | 9.072     | P          | 0.200   | 0.037  |     |       |
| SMD  | 1997 | 187 | 10 | 6       | 10.511    | P          | 0.200   | -0.008 |     |       |
| GPO  | 1997 | 187 | 10 | 6       | 2.045     | P          | 0.200   | -0.123 |     |       |
| MLAC | 1997 | 187 | 10 | 6       | 13.941    | P          | 0.200   | 0.197  |     |       |
| BGR  | 1997 | 187 | 10 | 6       | 9.616     | P          | 0.200   | -0.350 |     |       |
| SFK  | 1997 | 187 | 10 | 6       | 8.262     | P          | 0.200   | -0.039 |     |       |
| WMD  | 1997 | 187 | 10 | 6       | 7.590     | P          | 0.200   | 0.307  |     |       |
| CWC  | 1997 | 187 | 10 | 6       | 7.019     | P          | 0.200   | 0.296  |     |       |
| BRR  | 1997 | 187 | 10 | 6       | 10.952    | P          | 0.200   | -0.333 |     |       |
| LMC  | 1997 | 187 | 10 | 6       | 8.333     | P          | 0.200   | -0.439 |     |       |
| BPC  | 1997 | 187 | 10 | 6       | 10.814    | P          | 0.200   | 0.039  |     |       |
| HVY  | 1997 | 187 | 10 | 6       | 9.789     | P          | 0.200   | -1.257 |     |       |
| WHP  | 1997 | 187 | 10 | 6       | 7.936     | P          | 0.200   | 0.153  |     |       |
| CHP  | 1997 | 187 | 10 | 6       | 4.850     | P          | 0.200   | 0.277  |     |       |
| SFT  | 1997 | 187 | 10 | 6       | 7.588     | P          | 0.200   | 1.789  |     |       |
| PDC  | 1997 | 187 | 10 | 6       | 7.192     | P          | 0.200   | -0.096 |     |       |
| SRF  | 1997 | 187 | 10 | 6       | 9.072     | P          | 0.200   | 0.058  |     |       |
| DP00 | 1997 | 187 | 10 | 6       | 4.964     | P          | 0.200   | 0.107  |     |       |
| BVC  | 1997 | 187 | 10 | 6       | 7.322     | P          | 0.200   | 0.273  |     |       |
|      |      |     |    |         |           |            |         |        |     |       |
| 1997 | 208  | 5   | 21 | 30.5244 | -30.51700 | -71.86200  | 33.0000 |        | 648 | 0.000 |
| WHP  | 1997 | 208 | 5  | 33      | 35.105    | P          | 0.200   | 0.205  |     |       |
| LMC  | 1997 | 208 | 5  | 33      | 35.334    | P          | 0.200   | -0.530 |     |       |
| FLL  | 1997 | 208 | 5  | 33      | 39.715    | P          | 0.200   | -0.108 |     |       |
| SFK  | 1997 | 208 | 5  | 33      | 35.376    | P          | 0.200   | -0.024 |     |       |
| CCC  | 1997 | 208 | 5  | 33      | 36.316    | P          | 0.200   | -0.119 |     |       |
| TWR2 | 1997 | 208 | 5  | 33      | 34.629    | P          | 0.200   | 0.217  |     |       |
| JUN  | 1997 | 208 | 5  | 33      | 35.469    | P          | 0.200   | 0.012  |     |       |
| HVY  | 1997 | 208 | 5  | 33      | 36.921    | P          | 0.200   | -1.207 |     |       |
| BPC  | 1997 | 208 | 5  | 33      | 37.921    | P          | 0.200   | 0.040  |     |       |
| CPR  | 1997 | 208 | 5  | 33      | 36.693    | P          | 0.200   | 0.025  |     |       |
| BGR  | 1997 | 208 | 5  | 33      | 36.682    | P          | 0.200   | -0.374 |     |       |
| SFT  | 1997 | 208 | 5  | 33      | 33.171    | P          | 0.200   | 0.249  |     |       |
| OVY  | 1997 | 208 | 5  | 33      | 36.236    | P          | 0.200   | 0.092  |     |       |
| BRR  | 1997 | 208 | 5  | 33      | 38.092    | P          | 0.200   | -0.283 |     |       |
| SRF  | 1997 | 208 | 5  | 33      | 36.241    | P          | 0.200   | 0.108  |     |       |
| SMD  | 1997 | 208 | 5  | 33      | 37.663    | P          | 0.200   | 0.047  |     |       |
| WMD  | 1997 | 208 | 5  | 33      | 35.172    | P          | 0.200   | 0.781  |     |       |
| SLC  | 1997 | 208 | 5  | 33      | 33.375    | P          | 0.200   | 0.149  |     |       |
| ARC2 | 1997 | 208 | 5  | 33      | 33.241    | P          | 0.200   | 0.369  |     |       |
| DAC  | 1997 | 208 | 5  | 33      | 31.866    | P          | 0.200   | 0.094  |     |       |
| DP00 | 1997 | 208 | 5  | 33      | 32.065    | P          | 0.200   | 0.074  |     |       |
| BVC  | 1997 | 208 | 5  | 33      | 34.451    | P          | 0.200   | 0.276  |     |       |
| PDC  | 1997 | 208 | 5  | 33      | 34.291    | P          | 0.200   | -0.093 |     |       |
|      |      |     |    |         |           |            |         |        |     |       |
| 1997 | 227  | 7   | 37 | 50.9606 | -4.37300  | -105.69800 | 10.0000 |        | 665 | 0.000 |
| DP00 | 1997 | 227 | 7  | 45      | 42.075    | P          | 0.200   | 0.071  |     |       |
| BPC  | 1997 | 227 | 7  | 45      | 50.432    | P          | 0.200   | 0.071  |     |       |
| CPR  | 1997 | 227 | 7  | 45      | 48.097    | P          | 0.200   | 0.193  |     |       |

|      |      |     |    |         |           |            |         |        |     |       |
|------|------|-----|----|---------|-----------|------------|---------|--------|-----|-------|
| OVY  | 1997 | 227 | 7  | 45      | 47.580    | P          | 0.200   | 0.140  |     |       |
| BRR  | 1997 | 227 | 7  | 45      | 49.479    | P          | 0.200   | -0.288 |     |       |
| TIN  | 1997 | 227 | 7  | 45      | 49.501    | P          | 0.200   | 0.421  |     |       |
| TWR2 | 1997 | 227 | 7  | 45      | 44.417    | P          | 0.200   | 0.231  |     |       |
| ARC2 | 1997 | 227 | 7  | 45      | 41.532    | P          | 0.200   | 0.014  |     |       |
| WHP  | 1997 | 227 | 7  | 45      | 45.803    | P          | 0.200   | 0.140  |     |       |
| SRF  | 1997 | 227 | 7  | 45      | 48.189    | P          | 0.200   | -0.006 |     |       |
| JUN  | 1997 | 227 | 7  | 45      | 46.193    | P          | 0.200   | 0.153  |     |       |
| SMD  | 1997 | 227 | 7  | 45      | 49.495    | P          | 0.200   | 0.036  |     |       |
| HVY  | 1997 | 227 | 7  | 45      | 47.590    | P          | 0.200   | -1.107 |     |       |
| WMD  | 1997 | 227 | 7  | 45      | 43.749    | P          | 0.200   | 0.301  |     |       |
| BGR  | 1997 | 227 | 7  | 45      | 47.260    | P          | 0.200   | -0.187 |     |       |
| LMC  | 1997 | 227 | 7  | 45      | 45.124    | P          | 0.200   | -0.219 |     |       |
| GPO  | 1997 | 227 | 7  | 45      | 37.016    | P          | 0.200   | -0.064 |     |       |
| SFT  | 1997 | 227 | 7  | 45      | 42.508    | P          | 0.200   | -0.006 |     |       |
| FLL  | 1997 | 227 | 7  | 45      | 52.278    | P          | 0.200   | -0.250 |     |       |
| CWC  | 1997 | 227 | 7  | 45      | 44.513    | P          | 0.200   | 0.406  |     |       |
| SLC  | 1997 | 227 | 7  | 45      | 44.126    | P          | 0.200   | 0.110  |     |       |
| DAC  | 1997 | 227 | 7  | 45      | 41.907    | P          | 0.200   | 0.029  |     |       |
| PDC  | 1997 | 227 | 7  | 45      | 42.525    | P          | 0.200   | -0.210 |     |       |
| SFK  | 1997 | 227 | 7  | 45      | 45.058    | P          | 0.200   | 0.040  |     |       |
| MLAC | 1997 | 227 | 7  | 45      | 54.807    | P          | 0.200   | -0.018 |     |       |
|      |      |     |    |         |           |            |         |        |     |       |
| 1997 | 161  | 21  | 53 | 58.1557 | -35.81500 | -108.13500 | 10.0000 |        | 601 | 0.000 |
| BPC  | 1997 | 161 | 22 | 5       | 29.437    | P          | 0.200   | 0.155  |     |       |
| SRF  | 1997 | 161 | 22 | 5       | 28.089    | P          | 0.200   | 0.210  |     |       |
| WHP  | 1997 | 161 | 22 | 5       | 26.137    | P          | 0.200   | 0.279  |     |       |
| SFT  | 1997 | 161 | 22 | 5       | 24.121    | P          | 0.200   | 0.524  |     |       |
| MLAC | 1997 | 161 | 22 | 5       | 32.489    | P          | 0.200   | 0.250  |     |       |
| LMC  | 1997 | 161 | 22 | 5       | 24.381    | P          | 0.200   | -0.399 |     |       |
| WMD  | 1997 | 161 | 22 | 5       | 24.299    | P          | 0.200   | 0.400  |     |       |
| DAC  | 1997 | 161 | 22 | 5       | 23.774    | P          | 0.200   | 0.262  |     |       |
| ARC2 | 1997 | 161 | 22 | 5       | 23.018    | P          | 0.200   | 0.454  |     |       |
| HVY  | 1997 | 161 | 22 | 5       | 26.007    | P          | 0.200   | -1.033 |     |       |
| OVY  | 1997 | 161 | 22 | 5       | 27.270    | P          | 0.200   | 0.139  |     |       |
| BGR  | 1997 | 161 | 22 | 5       | 26.003    | P          | 0.200   | -0.420 |     |       |
| CPR  | 1997 | 161 | 22 | 5       | 26.509    | P          | 0.200   | -0.740 |     |       |
| PDC  | 1997 | 161 | 22 | 5       | 22.685    | P          | 0.200   | -0.083 |     |       |
|      |      |     |    |         |           |            |         |        |     |       |
| 1997 | 177  | 19  | 21 | 10.8694 | -49.69200 | -114.57000 | 10.0000 |        | 611 | 0.000 |
| MLAC | 1997 | 177 | 19 | 33      | 56.332    | P          | 0.200   | 0.404  |     |       |
| JUN  | 1997 | 177 | 19 | 33      | 51.002    | P          | 0.200   | 0.061  |     |       |
| BPC  | 1997 | 177 | 19 | 33      | 53.631    | P          | 0.200   | -0.001 |     |       |
| CWC  | 1997 | 177 | 19 | 33      | 50.454    | P          | 0.200   | 0.382  |     |       |
| CPR  | 1997 | 177 | 19 | 33      | 51.288    | P          | 0.200   | -0.598 |     |       |
| SFK  | 1997 | 177 | 19 | 33      | 49.316    | P          | 0.200   | -0.246 |     |       |
| LMC  | 1997 | 177 | 19 | 33      | 48.970    | P          | 0.200   | -0.576 |     |       |
| CHP  | 1997 | 177 | 19 | 33      | 47.857    | P          | 0.200   | 0.360  |     |       |
| PDC  | 1997 | 177 | 19 | 33      | 47.608    | P          | 0.200   | -0.237 |     |       |
| TWR2 | 1997 | 177 | 19 | 33      | 49.871    | P          | 0.200   | 0.141  |     |       |
| FLL  | 1997 | 177 | 19 | 33      | 54.064    | P          | 0.200   | -0.220 |     |       |
| DAC  | 1997 | 177 | 19 | 33      | 49.480    | P          | 0.200   | 0.308  |     |       |
| SFT  | 1997 | 177 | 19 | 33      | 49.768    | P          | 0.200   | 0.719  |     |       |
| WMD  | 1997 | 177 | 19 | 33      | 49.295    | P          | 0.200   | 0.164  |     |       |
| SRF  | 1997 | 177 | 19 | 33      | 52.791    | P          | 0.200   | 0.214  |     |       |
| HVY  | 1997 | 177 | 19 | 33      | 50.354    | P          | 0.200   | -0.940 |     |       |
| OVY  | 1997 | 177 | 19 | 33      | 52.003    | P          | 0.200   | 0.108  |     |       |
| SMD  | 1997 | 177 | 19 | 33      | 52.649    | P          | 0.200   | -0.071 |     |       |
| DP00 | 1997 | 177 | 19 | 33      | 49.487    | P          | 0.200   | 0.348  |     |       |
| BVC  | 1997 | 177 | 19 | 33      | 51.379    | P          | 0.200   | 0.284  |     |       |
| BGR  | 1997 | 177 | 19 | 33      | 50.346    | P          | 0.200   | -0.604 |     |       |
|      |      |     |    |         |           |            |         |        |     |       |
| 1997 | 246  | 6   | 22 | 46.5540 | -55.19000 | -128.98900 | 10.0000 |        | 678 | 0.000 |

|      |      |     |   |    |        |   |       |        |
|------|------|-----|---|----|--------|---|-------|--------|
| FLL  | 1997 | 246 | 6 | 35 | 57.134 | P | 0.200 | -0.026 |
| SFK  | 1997 | 246 | 6 | 35 | 52.703 | P | 0.200 | -0.132 |
| JUN  | 1997 | 246 | 6 | 35 | 54.395 | P | 0.200 | -0.025 |
| SRF  | 1997 | 246 | 6 | 35 | 56.297 | P | 0.200 | 0.267  |
| HVY  | 1997 | 246 | 6 | 35 | 53.502 | P | 0.200 | -0.669 |
| MKW3 | 1997 | 246 | 6 | 35 | 53.639 | P | 0.200 | -0.069 |
| SLC  | 1997 | 246 | 6 | 35 | 54.414 | P | 0.200 | 0.134  |
| TWR2 | 1997 | 246 | 6 | 35 | 53.351 | P | 0.200 | 0.063  |
| SMD  | 1997 | 246 | 6 | 35 | 55.956 | P | 0.200 | 0.077  |
| BGR  | 1997 | 246 | 6 | 35 | 53.704 | P | 0.200 | -0.337 |
| LMC  | 1997 | 246 | 6 | 35 | 52.257 | P | 0.200 | -0.468 |
| PDC  | 1997 | 246 | 6 | 35 | 51.065 | P | 0.200 | -0.076 |
| DP00 | 1997 | 246 | 6 | 35 | 53.425 | P | 0.200 | 0.325  |
| MLAC | 1997 | 246 | 6 | 35 | 59.500 | P | 0.200 | 0.701  |
| SFT  | 1997 | 246 | 6 | 35 | 53.094 | P | 0.200 | 0.262  |
| CPR  | 1997 | 246 | 6 | 35 | 55.241 | P | 0.200 | 0.040  |
| WHP  | 1997 | 246 | 6 | 35 | 54.609 | P | 0.200 | 0.176  |
| BPC  | 1997 | 246 | 6 | 35 | 56.944 | P | 0.200 | 0.104  |
| BRR  | 1997 | 246 | 6 | 35 | 55.129 | P | 0.200 | -0.349 |

|      |     |   |    |         |           |            |         |     |       |
|------|-----|---|----|---------|-----------|------------|---------|-----|-------|
| 1997 | 270 | 7 | 22 | 51.4942 | -29.55500 | -176.90601 | 33.0000 | 697 | 0.000 |
|------|-----|---|----|---------|-----------|------------|---------|-----|-------|

|      |      |     |   |    |        |   |       |        |
|------|------|-----|---|----|--------|---|-------|--------|
| BPC  | 1997 | 270 | 7 | 35 | 29.028 | P | 0.200 | 0.086  |
| TIN  | 1997 | 270 | 7 | 35 | 29.419 | P | 0.200 | 0.225  |
| WHP  | 1997 | 270 | 7 | 35 | 27.765 | P | 0.200 | -0.103 |
| DP00 | 1997 | 270 | 7 | 35 | 28.582 | P | 0.200 | 0.226  |
| CPR  | 1997 | 270 | 7 | 35 | 27.310 | P | 0.200 | -0.125 |
| JUN  | 1997 | 270 | 7 | 35 | 27.131 | P | 0.200 | -0.219 |
| PDC  | 1997 | 270 | 7 | 35 | 23.075 | P | 0.200 | -0.192 |
| CWC  | 1997 | 270 | 7 | 35 | 27.844 | P | 0.200 | 0.055  |
| SFK  | 1997 | 270 | 7 | 35 | 24.623 | P | 0.200 | -0.339 |
| CCC  | 1997 | 270 | 7 | 35 | 25.862 | P | 0.200 | -0.054 |
| SFT  | 1997 | 270 | 7 | 35 | 27.307 | P | 0.200 | 0.181  |
| MLAC | 1997 | 270 | 7 | 35 | 29.968 | P | 0.200 | 0.623  |
| SMD  | 1997 | 270 | 7 | 35 | 27.777 | P | 0.200 | 0.074  |
| CHP  | 1997 | 270 | 7 | 35 | 26.411 | P | 0.200 | 0.359  |
| SRF  | 1997 | 270 | 7 | 35 | 29.345 | P | 0.200 | 0.146  |
| BGR  | 1997 | 270 | 7 | 35 | 24.954 | P | 0.200 | -0.419 |
| ARC2 | 1997 | 270 | 7 | 35 | 25.778 | P | 0.200 | 0.228  |
| BRR  | 1997 | 270 | 7 | 35 | 26.237 | P | 0.200 | -0.142 |
| LMC  | 1997 | 270 | 7 | 35 | 23.912 | P | 0.200 | -0.447 |
| TWR2 | 1997 | 270 | 7 | 35 | 26.285 | P | 0.200 | -0.257 |
| SLC  | 1997 | 270 | 7 | 35 | 29.094 | P | 0.200 | -0.036 |
| HVY  | 1997 | 270 | 7 | 35 | 24.324 | P | 0.200 | -0.286 |
| FLL  | 1997 | 270 | 7 | 35 | 28.155 | P | 0.200 | 0.410  |
| OVY  | 1997 | 270 | 7 | 35 | 28.174 | P | 0.200 | 0.006  |

|      |     |    |    |         |           |            |         |     |       |
|------|-----|----|----|---------|-----------|------------|---------|-----|-------|
| 1997 | 263 | 16 | 11 | 34.5131 | -28.68300 | -177.62399 | 30.0000 | 687 | 0.006 |
|------|-----|----|----|---------|-----------|------------|---------|-----|-------|

|      |      |     |    |    |        |   |       |        |
|------|------|-----|----|----|--------|---|-------|--------|
| OVY  | 1997 | 263 | 16 | 24 | 10.669 | P | 0.200 | 0.010  |
| MLAC | 1997 | 263 | 16 | 24 | 12.284 | P | 0.200 | 0.524  |
| TIN  | 1997 | 263 | 16 | 24 | 11.904 | P | 0.200 | 0.234  |
| BPC  | 1997 | 263 | 16 | 24 | 11.546 | P | 0.200 | 0.141  |
| WMD  | 1997 | 263 | 16 | 24 | 7.841  | P | 0.200 | -0.328 |
| BGR  | 1997 | 263 | 16 | 24 | 7.468  | P | 0.200 | -0.363 |
| JUN  | 1997 | 263 | 16 | 24 | 9.633  | P | 0.200 | -0.215 |
| TWR2 | 1997 | 263 | 16 | 24 | 8.750  | P | 0.200 | -0.302 |
| GPO  | 1997 | 263 | 16 | 24 | 9.000  | P | 0.200 | 0.196  |
| CWC  | 1997 | 263 | 16 | 24 | 10.373 | P | 0.200 | 0.065  |
| CPR  | 1997 | 263 | 16 | 24 | 9.789  | P | 0.200 | -0.120 |
| SMD  | 1997 | 263 | 16 | 24 | 10.243 | P | 0.200 | 0.078  |
| SFK  | 1997 | 263 | 16 | 24 | 7.214  | P | 0.200 | -0.237 |
| GSC  | 1997 | 263 | 16 | 24 | 10.633 | P | 0.200 | 0.276  |
| ARC2 | 1997 | 263 | 16 | 24 | 8.318  | P | 0.200 | 0.229  |
| CHP  | 1997 | 263 | 16 | 24 | 8.872  | P | 0.200 | 0.265  |

|      |      |     |    |    |        |   |       |        |
|------|------|-----|----|----|--------|---|-------|--------|
| BRR  | 1997 | 263 | 16 | 24 | 8.683  | P | 0.200 | -0.132 |
| HVY  | 1997 | 263 | 16 | 24 | 6.766  | P | 0.200 | -0.286 |
| LMC  | 1997 | 263 | 16 | 24 | 6.341  | P | 0.200 | -0.491 |
| SFT  | 1997 | 263 | 16 | 24 | 9.749  | P | 0.200 | 0.089  |
| CCC  | 1997 | 263 | 16 | 24 | 8.343  | P | 0.200 | -0.050 |
| PDC  | 1997 | 263 | 16 | 24 | 5.576  | P | 0.200 | -0.192 |
| SRF  | 1997 | 263 | 16 | 24 | 11.793 | P | 0.200 | 0.100  |
| DP00 | 1997 | 263 | 16 | 24 | 11.146 | P | 0.200 | 0.230  |
| WHP  | 1997 | 263 | 16 | 24 | 10.377 | P | 0.200 | 0.001  |
| FLL  | 1997 | 263 | 16 | 24 | 10.534 | P | 0.200 | 0.360  |
| SLC  | 1997 | 263 | 16 | 24 | 11.588 | P | 0.200 | -0.081 |

|      |     |    |    |         |           |            |         |     |       |
|------|-----|----|----|---------|-----------|------------|---------|-----|-------|
| 1997 | 251 | 23 | 49 | 33.6588 | -20.73000 | -174.49600 | 33.0000 | 685 | 0.000 |
|------|-----|----|----|---------|-----------|------------|---------|-----|-------|

|      |      |     |   |   |        |   |       |        |
|------|------|-----|---|---|--------|---|-------|--------|
| LMC  | 1997 | 252 | 0 | 1 | 24.301 | P | 0.200 | -0.461 |
| WMD  | 1997 | 252 | 0 | 1 | 25.921 | P | 0.200 | -0.362 |
| TIN  | 1997 | 252 | 0 | 1 | 30.430 | P | 0.200 | 0.336  |
| CPR  | 1997 | 252 | 0 | 1 | 28.099 | P | 0.200 | -0.008 |
| SRF  | 1997 | 252 | 0 | 1 | 30.369 | P | 0.200 | 0.194  |
| OVY  | 1997 | 252 | 0 | 1 | 29.107 | P | 0.200 | 0.099  |
| SMD  | 1997 | 252 | 0 | 1 | 28.599 | P | 0.200 | 0.227  |
| SFK  | 1997 | 252 | 0 | 1 | 25.239 | P | 0.200 | -0.268 |
| BPC  | 1997 | 252 | 0 | 1 | 30.028 | P | 0.200 | 0.283  |
| SFT  | 1997 | 252 | 0 | 1 | 28.107 | P | 0.200 | 0.031  |
| JUN  | 1997 | 252 | 0 | 1 | 27.901 | P | 0.200 | -0.202 |
| DAC  | 1997 | 252 | 0 | 1 | 30.035 | P | 0.200 | 0.142  |
| MKW3 | 1997 | 252 | 0 | 1 | 26.580 | P | 0.200 | -0.294 |
| ARC2 | 1997 | 252 | 0 | 1 | 26.454 | P | 0.200 | 0.100  |
| CCC  | 1997 | 252 | 0 | 1 | 26.461 | P | 0.200 | -0.014 |
| TWR2 | 1997 | 252 | 0 | 1 | 26.990 | P | 0.200 | -0.296 |
| SLC  | 1997 | 252 | 0 | 1 | 30.316 | P | 0.200 | 0.018  |
| BRR  | 1997 | 252 | 0 | 1 | 26.666 | P | 0.200 | -0.140 |
| WHP  | 1997 | 252 | 0 | 1 | 28.746 | P | 0.200 | -0.011 |
| BGR  | 1997 | 252 | 0 | 1 | 25.422 | P | 0.200 | -0.373 |
| FLL  | 1997 | 252 | 0 | 1 | 28.705 | P | 0.200 | 0.446  |
| DP00 | 1997 | 252 | 0 | 1 | 29.833 | P | 0.200 | 0.273  |
| HVY  | 1997 | 252 | 0 | 1 | 24.533 | P | 0.200 | -0.358 |
| CHP  | 1997 | 252 | 0 | 1 | 27.073 | P | 0.200 | 0.124  |
| MLAC | 1997 | 252 | 0 | 1 | 30.480 | P | 0.200 | 0.511  |

|      |     |   |    |         |           |           |          |     |       |
|------|-----|---|----|---------|-----------|-----------|----------|-----|-------|
| 1997 | 247 | 4 | 23 | 38.0970 | -26.56900 | 178.33600 | 624.7000 | 679 | 0.000 |
|------|-----|---|----|---------|-----------|-----------|----------|-----|-------|

|      |      |     |   |    |        |   |       |        |
|------|------|-----|---|----|--------|---|-------|--------|
| LMC  | 1997 | 247 | 4 | 35 | 13.371 | P | 0.200 | -0.462 |
| WHP  | 1997 | 247 | 4 | 35 | 17.304 | P | 0.200 | 0.036  |
| SLC  | 1997 | 247 | 4 | 35 | 18.596 | P | 0.200 | 0.015  |
| HVY  | 1997 | 247 | 4 | 35 | 13.685 | P | 0.200 | -0.205 |
| SFT  | 1997 | 247 | 4 | 35 | 16.832 | P | 0.200 | 0.120  |
| PDC  | 1997 | 247 | 4 | 35 | 12.651 | P | 0.200 | -0.260 |
| MLAC | 1997 | 247 | 4 | 35 | 18.762 | P | 0.200 | 0.571  |
| GPO  | 1997 | 247 | 4 | 35 | 16.285 | P | 0.200 | 0.184  |
| SFK  | 1997 | 247 | 4 | 35 | 14.189 | P | 0.200 | -0.258 |
| BPC  | 1997 | 247 | 4 | 35 | 18.292 | P | 0.200 | 0.244  |
| SRF  | 1997 | 247 | 4 | 35 | 18.623 | P | 0.200 | 0.212  |
| WMD  | 1997 | 247 | 4 | 35 | 14.889 | P | 0.200 | -0.349 |
| FLL  | 1997 | 247 | 4 | 35 | 17.209 | P | 0.200 | 0.447  |
| SMD  | 1997 | 247 | 4 | 35 | 17.054 | P | 0.200 | 0.175  |
| OVY  | 1997 | 247 | 4 | 35 | 17.615 | P | 0.200 | 0.156  |
| DP00 | 1997 | 247 | 4 | 35 | 18.214 | P | 0.200 | 0.290  |
| DAC  | 1997 | 247 | 4 | 35 | 18.385 | P | 0.200 | 0.140  |
| JUN  | 1997 | 247 | 4 | 35 | 16.563 | P | 0.200 | -0.173 |
| TWR2 | 1997 | 247 | 4 | 35 | 15.781 | P | 0.200 | -0.261 |
| MKW3 | 1997 | 247 | 4 | 35 | 15.518 | P | 0.200 | -0.147 |
| CPR  | 1997 | 247 | 4 | 35 | 16.625 | P | 0.200 | -0.080 |
| CCC  | 1997 | 247 | 4 | 35 | 15.324 | P | 0.200 | 0.038  |
| BRR  | 1997 | 247 | 4 | 35 | 15.517 | P | 0.200 | -0.055 |



|      |      |     |    |    |         |           |            |         |     |       |
|------|------|-----|----|----|---------|-----------|------------|---------|-----|-------|
| BGR  | 1997 | 247 | 4  | 35 | 14.327  | P         | 0.200      | -0.377  |     |       |
| 1997 | 216  | 18  | 54 |    | 0.3224  | -15.16000 | -175.27299 | 33.0000 | 656 | 0.000 |
| SMD  | 1997 | 216 | 19 | 5  | 35.348  | P         | 0.200      | 0.276   |     |       |
| BPC  | 1997 | 216 | 19 | 5  | 36.771  | P         | 0.200      | 0.280   |     |       |
| SRF  | 1997 | 216 | 19 | 5  | 37.323  | P         | 0.200      | 0.236   |     |       |
| ARC2 | 1997 | 216 | 19 | 5  | 33.430  | P         | 0.200      | 0.066   |     |       |
| WMD  | 1997 | 216 | 19 | 5  | 32.829  | P         | 0.200      | -0.315  |     |       |
| JUN  | 1997 | 216 | 19 | 5  | 34.816  | P         | 0.200      | -0.127  |     |       |
| FLL  | 1997 | 216 | 19 | 5  | 35.129  | P         | 0.200      | 0.353   |     |       |
| DP00 | 1997 | 216 | 19 | 5  | 37.058  | P         | 0.200      | 0.266   |     |       |
| CPR  | 1997 | 216 | 19 | 5  | 34.922  | P         | 0.200      | 0.081   |     |       |
| OVY  | 1997 | 216 | 19 | 5  | 36.011  | P         | 0.200      | 0.146   |     |       |
| BRR  | 1997 | 216 | 19 | 5  | 33.279  | P         | 0.200      | -0.072  |     |       |
| PDC  | 1997 | 216 | 19 | 5  | 30.284  | P         | 0.200      | -0.174  |     |       |
| LMC  | 1997 | 216 | 19 | 5  | 31.031  | P         | 0.200      | -0.406  |     |       |
| HVY  | 1997 | 216 | 19 | 5  | 31.102  | P         | 0.200      | -0.290  |     |       |
| CCC  | 1997 | 216 | 19 | 5  | 33.233  | P         | 0.200      | 0.042   |     |       |
| CWC  | 1997 | 216 | 19 | 5  | 35.768  | P         | 0.200      | 0.031   |     |       |
| SFK  | 1997 | 216 | 19 | 5  | 32.095  | P         | 0.200      | -0.166  |     |       |
| WHP  | 1997 | 216 | 19 | 5  | 35.754  | P         | 0.200      | 0.058   |     |       |
| SLC  | 1997 | 216 | 19 | 5  | 37.472  | P         | 0.200      | 0.026   |     |       |
| BGR  | 1997 | 216 | 19 | 5  | 32.146  | P         | 0.200      | -0.258  |     |       |
| SFT  | 1997 | 216 | 19 | 5  | 35.230  | P         | 0.200      | 0.083   |     |       |
| DAC  | 1997 | 216 | 19 | 5  | 37.297  | P         | 0.200      | 0.167   |     |       |
| TWR2 | 1997 | 216 | 19 | 5  | 33.874  | P         | 0.200      | -0.302  |     |       |
| 1997 | 241  | 6   | 54 |    | 1.5507  | -15.23500 | -175.57600 | 33.0000 | 674 | 0.000 |
| SFK  | 1997 | 241 | 7  | 5  | 34.835  | P         | 0.200      | -0.166  |     |       |
| FLL  | 1997 | 241 | 7  | 5  | 37.881  | P         | 0.200      | 0.384   |     |       |
| GPO  | 1997 | 241 | 7  | 5  | 37.611  | P         | 0.200      | 0.134   |     |       |
| SFT  | 1997 | 241 | 7  | 5  | 37.919  | P         | 0.200      | 0.031   |     |       |
| TWR2 | 1997 | 241 | 7  | 5  | 36.594  | P         | 0.200      | -0.323  |     |       |
| WHP  | 1997 | 241 | 7  | 5  | 38.412  | P         | 0.200      | -0.018  |     |       |
| BGR  | 1997 | 241 | 7  | 5  | 34.830  | P         | 0.200      | -0.309  |     |       |
| MLAC | 1997 | 241 | 7  | 5  | 39.578  | P         | 0.200      | 0.406   |     |       |
| BPC  | 1997 | 241 | 7  | 5  | 39.440  | P         | 0.200      | 0.230   |     |       |
| SRF  | 1997 | 241 | 7  | 5  | 39.995  | P         | 0.200      | 0.185   |     |       |
| WMD  | 1997 | 241 | 7  | 5  | 35.498  | P         | 0.200      | -0.391  |     |       |
| SMD  | 1997 | 241 | 7  | 5  | 38.072  | P         | 0.200      | 0.272   |     |       |
| DP00 | 1997 | 241 | 7  | 5  | 39.793  | P         | 0.200      | 0.265   |     |       |
| HVY  | 1997 | 241 | 7  | 5  | 33.862  | P         | 0.200      | -0.262  |     |       |
| CPR  | 1997 | 241 | 7  | 5  | 37.684  | P         | 0.200      | 0.112   |     |       |
| ARC2 | 1997 | 241 | 7  | 5  | 36.218  | P         | 0.200      | 0.106   |     |       |
| BRR  | 1997 | 241 | 7  | 5  | 36.000  | P         | 0.200      | -0.081  |     |       |
| PDC  | 1997 | 241 | 7  | 5  | 32.983  | P         | 0.200      | -0.220  |     |       |
| DAC  | 1997 | 241 | 7  | 5  | 40.010  | P         | 0.200      | 0.145   |     |       |
| LMC  | 1997 | 241 | 7  | 5  | 33.768  | P         | 0.200      | -0.408  |     |       |
| JUN  | 1997 | 241 | 7  | 5  | 37.548  | P         | 0.200      | -0.132  |     |       |
| CWC  | 1997 | 241 | 7  | 5  | 38.502  | P         | 0.200      | 0.030   |     |       |
| SLC  | 1997 | 241 | 7  | 5  | 40.185  | P         | 0.200      | 0.010   |     |       |
| 1997 | 220  | 22  | 27 |    | 21.3676 | -15.47700 | -179.14000 | 10.0000 | 660 | 0.000 |
| JUN  | 1997 | 220 | 22 | 39 | 15.813  | P         | 0.200      | -0.096  |     |       |
| SRF  | 1997 | 220 | 22 | 39 | 18.196  | P         | 0.200      | 0.290   |     |       |
| SFT  | 1997 | 220 | 22 | 39 | 16.226  | P         | 0.200      | 0.022   |     |       |
| LMC  | 1997 | 220 | 22 | 39 | 12.069  | P         | 0.200      | -0.422  |     |       |
| DP00 | 1997 | 220 | 22 | 39 | 18.023  | P         | 0.200      | 0.217   |     |       |
| OVY  | 1997 | 220 | 22 | 39 | 16.943  | P         | 0.200      | 0.183   |     |       |
| CWC  | 1997 | 220 | 22 | 39 | 16.698  | P         | 0.200      | -0.027  |     |       |
| WHP  | 1997 | 220 | 22 | 39 | 16.719  | P         | 0.200      | 0.072   |     |       |
| CCC  | 1997 | 220 | 22 | 39 | 14.196  | P         | 0.200      | 0.024   |     |       |
| PDC  | 1997 | 220 | 22 | 39 | 11.379  | P         | 0.200      | -0.240  |     |       |

|      |      |     |    |    |        |   |       |        |
|------|------|-----|----|----|--------|---|-------|--------|
| SLC  | 1997 | 220 | 22 | 39 | 18.393 | P | 0.200 | 0.002  |
| HVY  | 1997 | 220 | 22 | 39 | 12.062 | P | 0.200 | -0.283 |
| ARC2 | 1997 | 220 | 22 | 39 | 14.649 | P | 0.200 | 0.138  |
| WMD  | 1997 | 220 | 22 | 39 | 13.982 | P | 0.200 | -0.266 |
| SMD  | 1997 | 220 | 22 | 39 | 16.079 | P | 0.200 | 0.161  |
| DAC  | 1997 | 220 | 22 | 39 | 18.235 | P | 0.200 | 0.095  |
| CPR  | 1997 | 220 | 22 | 39 | 15.740 | P | 0.200 | 0.000  |
| GPO  | 1997 | 220 | 22 | 39 | 16.073 | P | 0.200 | 0.124  |
| TWR2 | 1997 | 220 | 22 | 39 | 14.977 | P | 0.200 | -0.237 |
| SFK  | 1997 | 220 | 22 | 39 | 13.227 | P | 0.200 | -0.086 |
| FLL  | 1997 | 220 | 22 | 39 | 15.905 | P | 0.200 | 0.366  |
| BPC  | 1997 | 220 | 22 | 39 | 17.544 | P | 0.200 | 0.278  |
| BGR  | 1997 | 220 | 22 | 39 | 13.100 | P | 0.200 | -0.271 |
| BRR  | 1997 | 220 | 22 | 39 | 14.185 | P | 0.200 | -0.045 |

|      |      |     |    |         |           |           |         |        |       |
|------|------|-----|----|---------|-----------|-----------|---------|--------|-------|
| 1997 | 229  | 20  | 11 | 12.1110 | -13.59200 | 167.39101 | 25.9000 | 666    | 0.000 |
| BPC  | 1997 | 229 | 20 | 23      | 50.590    | P         | 0.200   | 0.387  |       |
| MLAC | 1997 | 229 | 20 | 23      | 49.927    | P         | 0.200   | 0.379  |       |
| WMD  | 1997 | 229 | 20 | 23      | 47.798    | P         | 0.200   | -0.490 |       |
| TIN  | 1997 | 229 | 20 | 23      | 51.153    | P         | 0.200   | 0.428  |       |
| TWR2 | 1997 | 229 | 20 | 23      | 48.744    | P         | 0.200   | -0.285 |       |
| OVY  | 1997 | 229 | 20 | 23      | 50.218    | P         | 0.200   | 0.116  |       |
| ARC2 | 1997 | 229 | 20 | 23      | 48.638    | P         | 0.200   | -0.084 |       |
| BGR  | 1997 | 229 | 20 | 23      | 46.645    | P         | 0.200   | -0.335 |       |
| SRF  | 1997 | 229 | 20 | 23      | 51.210    | P         | 0.200   | 0.193  |       |
| JUN  | 1997 | 229 | 20 | 23      | 49.372    | P         | 0.200   | -0.094 |       |
| CWC  | 1997 | 229 | 20 | 23      | 50.414    | P         | 0.200   | 0.026  |       |
| CPR  | 1997 | 229 | 20 | 23      | 49.131    | P         | 0.200   | 0.053  |       |
| BRR  | 1997 | 229 | 20 | 23      | 47.410    | P         | 0.200   | -0.106 |       |
| SFT  | 1997 | 229 | 20 | 23      | 50.174    | P         | 0.200   | 0.067  |       |
| HVY  | 1997 | 229 | 20 | 23      | 45.542    | P         | 0.200   | -0.359 |       |
| GPO  | 1997 | 229 | 20 | 23      | 50.701    | P         | 0.200   | 0.287  |       |
| SFK  | 1997 | 229 | 20 | 23      | 46.990    | P         | 0.200   | -0.223 |       |
| FLL  | 1997 | 229 | 20 | 23      | 48.704    | P         | 0.200   | 0.283  |       |
| SMD  | 1997 | 229 | 20 | 23      | 49.331    | P         | 0.200   | 0.257  |       |
| SLC  | 1997 | 229 | 20 | 23      | 51.955    | P         | 0.200   | 0.032  |       |
| WHP  | 1997 | 229 | 20 | 23      | 50.190    | P         | 0.200   | 0.017  |       |
| LMC  | 1997 | 229 | 20 | 23      | 45.972    | P         | 0.200   | -0.435 |       |
| PDC  | 1997 | 229 | 20 | 23      | 45.493    | P         | 0.200   | -0.433 |       |
| DP00 | 1997 | 229 | 20 | 23      | 51.910    | P         | 0.200   | 0.321  |       |

|      |      |     |    |         |           |           |         |        |       |
|------|------|-----|----|---------|-----------|-----------|---------|--------|-------|
| 1997 | 230  | 10  | 56 | 40.4620 | -13.63500 | 167.31400 | 33.0000 | 667    | 0.000 |
| TIN  | 1997 | 230 | 11 | 9       | 18.910    | P         | 0.200   | 0.430  |       |
| WMD  | 1997 | 230 | 11 | 9       | 15.710    | P         | 0.200   | -0.337 |       |
| SRF  | 1997 | 230 | 11 | 9       | 18.967    | P         | 0.200   | 0.195  |       |
| CWC  | 1997 | 230 | 11 | 9       | 18.222    | P         | 0.200   | 0.079  |       |
| BPC  | 1997 | 230 | 11 | 9       | 18.348    | P         | 0.200   | 0.390  |       |
| ARC2 | 1997 | 230 | 11 | 9       | 16.299    | P         | 0.200   | -0.182 |       |
| SFK  | 1997 | 230 | 11 | 9       | 14.753    | P         | 0.200   | -0.219 |       |
| CPR  | 1997 | 230 | 11 | 9       | 16.891    | P         | 0.200   | 0.055  |       |
| SFT  | 1997 | 230 | 11 | 9       | 18.033    | P         | 0.200   | 0.171  |       |
| FLL  | 1997 | 230 | 11 | 9       | 16.414    | P         | 0.200   | 0.237  |       |
| BRR  | 1997 | 230 | 11 | 9       | 15.222    | P         | 0.200   | -0.052 |       |
| OVY  | 1997 | 230 | 11 | 9       | 18.027    | P         | 0.200   | 0.170  |       |
| SMD  | 1997 | 230 | 11 | 9       | 17.140    | P         | 0.200   | 0.309  |       |
| SLC  | 1997 | 230 | 11 | 9       | 19.712    | P         | 0.200   | 0.033  |       |
| LMC  | 1997 | 230 | 11 | 9       | 13.786    | P         | 0.200   | -0.380 |       |
| DP00 | 1997 | 230 | 11 | 9       | 19.667    | P         | 0.200   | 0.321  |       |
| BGR  | 1997 | 230 | 11 | 9       | 14.457    | P         | 0.200   | -0.282 |       |
| JUN  | 1997 | 230 | 11 | 9       | 17.132    | P         | 0.200   | -0.090 |       |
| TWR2 | 1997 | 230 | 11 | 9       | 16.504    | P         | 0.200   | -0.283 |       |
| PDC  | 1997 | 230 | 11 | 9       | 13.308    | P         | 0.200   | -0.379 |       |
| HVY  | 1997 | 230 | 11 | 9       | 13.456    | P         | 0.200   | -0.205 |       |

|      |      |     |    |         |          |            |          |        |     |       |
|------|------|-----|----|---------|----------|------------|----------|--------|-----|-------|
| WHP  | 1997 | 230 | 11 | 9       | 17.949   | P          | 0.200    | 0.018  |     |       |
| 1997 | 181  | 15  | 47 | 40.9633 | 19.35800 | -155.06799 | 7.5000   |        | 617 | 0.000 |
| SRF  | 1997 | 181 | 15 | 54      | 49.060   | P          | 0.200    | 0.332  |     |       |
| SFT  | 1997 | 181 | 15 | 54      | 47.497   | P          | 0.200    | 0.310  |     |       |
| TWR2 | 1997 | 181 | 15 | 54      | 45.056   | P          | 0.200    | -0.169 |     |       |
| WMD  | 1997 | 181 | 15 | 54      | 43.751   | P          | 0.200    | -0.112 |     |       |
| JUN  | 1997 | 181 | 15 | 54      | 45.884   | P          | 0.200    | 0.018  |     |       |
| BPC  | 1997 | 181 | 15 | 54      | 47.640   | P          | 0.200    | 0.434  |     |       |
| OVY  | 1997 | 181 | 15 | 54      | 47.199   | P          | 0.200    | 0.180  |     |       |
| PDC  | 1997 | 181 | 15 | 54      | 39.766   | P          | 0.200    | -0.607 |     |       |
| BVC  | 1997 | 181 | 15 | 54      | 49.681   | P          | 0.200    | 0.160  |     |       |
| SMD  | 1997 | 181 | 15 | 54      | 45.620   | P          | 0.200    | 0.277  |     |       |
| MLAC | 1997 | 181 | 15 | 54      | 46.487   | P          | 0.200    | 0.524  |     |       |
| FLL  | 1997 | 181 | 15 | 54      | 44.340   | P          | 0.200    | 0.241  |     |       |
| CWC  | 1997 | 181 | 15 | 54      | 47.671   | P          | 0.200    | 0.088  |     |       |
| DAC  | 1997 | 181 | 15 | 54      | 50.490   | P          | 0.200    | 0.170  |     |       |
| WHP  | 1997 | 181 | 15 | 54      | 47.187   | P          | 0.200    | 0.053  |     |       |
| DP00 | 1997 | 181 | 15 | 54      | 50.055   | P          | 0.200    | 0.077  |     |       |
| CHP  | 1997 | 181 | 15 | 54      | 45.956   | P          | 0.200    | -0.251 |     |       |
| SFK  | 1997 | 181 | 15 | 54      | 42.274   | P          | 0.200    | -0.151 |     |       |
| CPR  | 1997 | 181 | 15 | 54      | 44.994   | P          | 0.200    | -0.247 |     |       |
| LMC  | 1997 | 181 | 15 | 54      | 40.550   | P          | 0.200    | -0.382 |     |       |
| BGR  | 1997 | 181 | 15 | 54      | 41.421   | P          | 0.200    | -0.376 |     |       |
| HVY  | 1997 | 181 | 15 | 54      | 39.526   | P          | 0.200    | -0.569 |     |       |
| 1997 | 279  | 20  | 52 | 46.6753 | -9.30200 | 158.69099  | 33.0000  |        | 712 | 0.000 |
| OVY  | 1997 | 279 | 21 | 5       | 43.354   | P          | 0.200    | 0.145  |     |       |
| TIN  | 1997 | 279 | 21 | 5       | 44.071   | P          | 0.200    | 0.455  |     |       |
| SFK  | 1997 | 279 | 21 | 5       | 40.527   | P          | 0.200    | -0.157 |     |       |
| WMD  | 1997 | 279 | 21 | 5       | 41.349   | P          | 0.200    | -0.493 |     |       |
| CPR  | 1997 | 279 | 21 | 5       | 42.316   | P          | 0.200    | 0.142  |     |       |
| MKW3 | 1997 | 279 | 21 | 5       | 41.779   | P          | 0.200    | 0.006  |     |       |
| SRF  | 1997 | 279 | 21 | 5       | 44.163   | P          | 0.200    | 0.177  |     |       |
| CCC  | 1997 | 279 | 21 | 5       | 41.283   | P          | 0.200    | 0.194  |     |       |
| TWR2 | 1997 | 279 | 21 | 5       | 42.264   | P          | 0.200    | -0.195 |     |       |
| FLL  | 1997 | 279 | 21 | 5       | 41.436   | P          | 0.200    | 0.250  |     |       |
| JUN  | 1997 | 279 | 21 | 5       | 42.665   | P          | 0.200    | -0.058 |     |       |
| ARC2 | 1997 | 279 | 21 | 5       | 42.117   | P          | 0.200    | -0.317 |     |       |
| BPC  | 1997 | 279 | 21 | 5       | 43.410   | P          | 0.200    | 0.380  |     |       |
| CHP  | 1997 | 279 | 21 | 5       | 43.247   | P          | 0.200    | -0.023 |     |       |
| BRR  | 1997 | 279 | 21 | 5       | 40.533   | P          | 0.200    | -0.014 |     |       |
| SLC  | 1997 | 279 | 21 | 5       | 45.154   | P          | 0.200    | -0.016 |     |       |
| DP00 | 1997 | 279 | 21 | 5       | 45.252   | P          | 0.200    | 0.210  |     |       |
| HVY  | 1997 | 279 | 21 | 5       | 38.784   | P          | 0.200    | -0.341 |     |       |
| DAC  | 1997 | 279 | 21 | 5       | 45.485   | P          | 0.200    | 0.120  |     |       |
| PDC  | 1997 | 279 | 21 | 5       | 39.201   | P          | 0.200    | -0.466 |     |       |
| 1997 | 250  | 12  | 57 | 8.5418  | -6.01700 | 154.45799  | 421.1000 |        | 683 | 0.000 |
| CPR  | 1997 | 250 | 13 | 9       | 27.474   | P          | 0.200    | 0.074  |     |       |
| SFT  | 1997 | 250 | 13 | 9       | 29.164   | P          | 0.200    | 0.095  |     |       |
| WMD  | 1997 | 250 | 13 | 9       | 26.959   | P          | 0.200    | -0.358 |     |       |
| FLL  | 1997 | 250 | 13 | 9       | 26.288   | P          | 0.200    | 0.061  |     |       |
| TWR2 | 1997 | 250 | 13 | 9       | 27.710   | P          | 0.200    | -0.162 |     |       |
| SLC  | 1997 | 250 | 13 | 9       | 30.479   | P          | 0.200    | -0.022 |     |       |
| JUN  | 1997 | 250 | 13 | 9       | 27.964   | P          | 0.200    | -0.077 |     |       |
| LMC  | 1997 | 250 | 13 | 9       | 24.921   | P          | 0.200    | -0.372 |     |       |
| SMD  | 1997 | 250 | 13 | 9       | 27.468   | P          | 0.200    | 0.237  |     |       |
| DAC  | 1997 | 250 | 13 | 9       | 30.964   | P          | 0.200    | 0.141  |     |       |
| PDC  | 1997 | 250 | 13 | 9       | 24.830   | P          | 0.200    | -0.402 |     |       |
| MLAC | 1997 | 250 | 13 | 9       | 27.232   | P          | 0.200    | 0.308  |     |       |
| ARC2 | 1997 | 250 | 13 | 9       | 27.706   | P          | 0.200    | -0.309 |     |       |
| SRF  | 1997 | 250 | 13 | 9       | 29.313   | P          | 0.200    | 0.154  |     |       |

|      |      |     |    |   |        |   |       |        |
|------|------|-----|----|---|--------|---|-------|--------|
| BPC  | 1997 | 250 | 13 | 9 | 28.429 | P | 0.200 | 0.316  |
| MKW3 | 1997 | 250 | 13 | 9 | 27.180 | P | 0.200 | 0.037  |
| OVY  | 1997 | 250 | 13 | 9 | 28.571 | P | 0.200 | 0.125  |
| SFK  | 1997 | 250 | 13 | 9 | 26.065 | P | 0.200 | -0.049 |
| CHP  | 1997 | 250 | 13 | 9 | 28.835 | P | 0.200 | -0.036 |
| CCC  | 1997 | 250 | 13 | 9 | 26.583 | P | 0.200 | 0.166  |
| DP00 | 1997 | 250 | 13 | 9 | 30.735 | P | 0.200 | 0.234  |
| HVY  | 1997 | 250 | 13 | 9 | 24.072 | P | 0.200 | -0.331 |
| GPO  | 1997 | 250 | 13 | 9 | 30.356 | P | 0.200 | 0.333  |
| WHP  | 1997 | 250 | 13 | 9 | 28.713 | P | 0.200 | -0.022 |
| BRR  | 1997 | 250 | 13 | 9 | 25.590 | P | 0.200 | -0.141 |

|      |     |   |    |         |          |           |         |     |       |
|------|-----|---|----|---------|----------|-----------|---------|-----|-------|
| 1997 | 209 | 6 | 46 | 56.6131 | 22.35700 | 142.73300 | 33.0000 | 651 | 0.000 |
|------|-----|---|----|---------|----------|-----------|---------|-----|-------|

|      |      |     |   |    |        |   |       |        |
|------|------|-----|---|----|--------|---|-------|--------|
| TWR2 | 1997 | 209 | 6 | 59 | 23.085 | P | 0.200 | -0.147 |
| BRR  | 1997 | 209 | 6 | 59 | 19.605 | P | 0.200 | 0.018  |
| ARC2 | 1997 | 209 | 6 | 59 | 23.852 | P | 0.200 | -0.320 |
| SFK  | 1997 | 209 | 6 | 59 | 21.356 | P | 0.200 | -0.008 |
| DP00 | 1997 | 209 | 6 | 59 | 26.288 | P | 0.200 | 0.103  |
| OVY  | 1997 | 209 | 6 | 59 | 22.874 | P | 0.200 | 0.193  |
| BGR  | 1997 | 209 | 6 | 59 | 19.960 | P | 0.200 | -0.284 |
| JUN  | 1997 | 209 | 6 | 59 | 22.856 | P | 0.200 | 0.029  |
| DAC  | 1997 | 209 | 6 | 59 | 26.445 | P | 0.200 | -0.048 |
| HVY  | 1997 | 209 | 6 | 59 | 18.388 | P | 0.200 | -0.357 |
| LMC  | 1997 | 209 | 6 | 59 | 20.202 | P | 0.200 | -0.377 |
| PDC  | 1997 | 209 | 6 | 59 | 20.947 | P | 0.200 | -0.371 |
| CPR  | 1997 | 209 | 6 | 59 | 21.699 | P | 0.200 | 0.087  |
| BVC  | 1997 | 209 | 6 | 59 | 24.376 | P | 0.200 | 0.097  |
| BPC  | 1997 | 209 | 6 | 59 | 21.931 | P | 0.200 | 0.427  |
| SLC  | 1997 | 209 | 6 | 59 | 25.380 | P | 0.200 | -0.024 |
| FLL  | 1997 | 209 | 6 | 59 | 19.426 | P | 0.200 | 0.240  |
| WMD  | 1997 | 209 | 6 | 59 | 22.805 | P | 0.200 | -0.164 |
| WHP  | 1997 | 209 | 6 | 59 | 23.657 | P | 0.200 | 0.122  |
| SMD  | 1997 | 209 | 6 | 59 | 21.293 | P | 0.200 | 0.200  |
| SFT  | 1997 | 209 | 6 | 59 | 24.778 | P | 0.200 | 0.027  |
| SRF  | 1997 | 209 | 6 | 59 | 23.440 | P | 0.200 | 0.317  |
| CCC  | 1997 | 209 | 6 | 59 | 21.387 | P | 0.200 | 0.239  |

|      |     |   |    |         |          |           |          |     |       |
|------|-----|---|----|---------|----------|-----------|----------|-----|-------|
| 1997 | 245 | 0 | 39 | 31.9336 | 26.97800 | 140.11000 | 480.5000 | 676 | 0.000 |
|------|-----|---|----|---------|----------|-----------|----------|-----|-------|

|      |      |     |   |    |       |   |       |        |
|------|------|-----|---|----|-------|---|-------|--------|
| DP00 | 1997 | 245 | 0 | 51 | 8.991 | P | 0.200 | -0.018 |
| BRR  | 1997 | 245 | 0 | 51 | 2.265 | P | 0.200 | -0.206 |
| BGR  | 1997 | 245 | 0 | 51 | 2.924 | P | 0.200 | -0.304 |
| FLL  | 1997 | 245 | 0 | 51 | 2.181 | P | 0.200 | 0.280  |
| CPR  | 1997 | 245 | 0 | 51 | 4.704 | P | 0.200 | 0.254  |
| HVY  | 1997 | 245 | 0 | 51 | 1.428 | P | 0.200 | -0.323 |
| SFK  | 1997 | 245 | 0 | 51 | 4.476 | P | 0.200 | 0.082  |
| SRF  | 1997 | 245 | 0 | 51 | 6.142 | P | 0.200 | 0.344  |
| TWR2 | 1997 | 245 | 0 | 51 | 5.972 | P | 0.200 | -0.228 |
| BPC  | 1997 | 245 | 0 | 51 | 4.678 | P | 0.200 | 0.502  |
| SLC  | 1997 | 245 | 0 | 51 | 8.053 | P | 0.200 | -0.093 |
| OVY  | 1997 | 245 | 0 | 51 | 5.733 | P | 0.200 | 0.291  |
| SFT  | 1997 | 245 | 0 | 51 | 7.786 | P | 0.200 | 0.111  |
| JUN  | 1997 | 245 | 0 | 51 | 5.607 | P | 0.200 | -0.105 |
| LMC  | 1997 | 245 | 0 | 51 | 3.322 | P | 0.200 | -0.340 |
| SMD  | 1997 | 245 | 0 | 51 | 4.043 | P | 0.200 | 0.180  |
| WMD  | 1997 | 245 | 0 | 51 | 5.886 | P | 0.200 | -0.145 |
| PDC  | 1997 | 245 | 0 | 51 | 4.229 | P | 0.200 | -0.281 |

|      |     |   |    |         |          |           |         |     |       |
|------|-----|---|----|---------|----------|-----------|---------|-----|-------|
| 1997 | 273 | 6 | 27 | 25.0570 | 31.95900 | 141.87801 | 10.0000 | 701 | 0.000 |
|------|-----|---|----|---------|----------|-----------|---------|-----|-------|

|     |      |     |   |    |        |   |       |        |
|-----|------|-----|---|----|--------|---|-------|--------|
| SFT | 1997 | 273 | 6 | 39 | 29.914 | P | 0.200 | 0.010  |
| BRR | 1997 | 273 | 6 | 39 | 23.898 | P | 0.200 | -0.257 |
| FLL | 1997 | 273 | 6 | 39 | 23.550 | P | 0.200 | 0.130  |
| GPO | 1997 | 273 | 6 | 39 | 32.744 | P | 0.200 | -0.044 |
| TIN | 1997 | 273 | 6 | 39 | 27.360 | P | 0.200 | 0.505  |

|      |      |     |    |         |          |           |          |        |     |       |
|------|------|-----|----|---------|----------|-----------|----------|--------|-----|-------|
| CPR  | 1997 | 273 | 6  | 39      | 26.394   | P         | 0.200    | 0.101  |     |       |
| CCC  | 1997 | 273 | 6  | 39      | 26.222   | P         | 0.200    | 0.219  |     |       |
| SRF  | 1997 | 273 | 6  | 39      | 27.967   | P         | 0.200    | 0.279  |     |       |
| CWC  | 1997 | 273 | 6  | 39      | 29.194   | P         | 0.200    | -0.001 |     |       |
| SLC  | 1997 | 273 | 6  | 39      | 30.163   | P         | 0.200    | -0.139 |     |       |
| SMD  | 1997 | 273 | 6  | 39      | 25.737   | P         | 0.200    | 0.136  |     |       |
| WHP  | 1997 | 273 | 6  | 39      | 28.383   | P         | 0.200    | 0.003  |     |       |
| MLAC | 1997 | 273 | 6  | 39      | 23.567   | P         | 0.200    | 0.573  |     |       |
| BPC  | 1997 | 273 | 6  | 39      | 26.290   | P         | 0.200    | 0.391  |     |       |
| LMC  | 1997 | 273 | 6  | 39      | 25.278   | P         | 0.200    | -0.345 |     |       |
| HVY  | 1997 | 273 | 6  | 39      | 23.048   | P         | 0.200    | -0.422 |     |       |
| OVY  | 1997 | 273 | 6  | 39      | 27.587   | P         | 0.200    | 0.239  |     |       |
| TWR2 | 1997 | 273 | 6  | 39      | 28.216   | P         | 0.200    | -0.078 |     |       |
| DP00 | 1997 | 273 | 6  | 39      | 31.193   | P         | 0.200    | -0.118 |     |       |
| SFK  | 1997 | 273 | 6  | 39      | 26.425   | P         | 0.200    | 0.028  |     |       |
| JUN  | 1997 | 273 | 6  | 39      | 27.639   | P         | 0.200    | -0.056 |     |       |
| WMD  | 1997 | 273 | 6  | 39      | 27.968   | P         | 0.200    | -0.183 |     |       |
| ARC2 | 1997 | 273 | 6  | 39      | 29.227   | P         | 0.200    | -0.269 |     |       |
| PDC  | 1997 | 273 | 6  | 39      | 26.304   | P         | 0.200    | -0.338 |     |       |
| CHP  | 1997 | 273 | 6  | 39      | 30.472   | P         | 0.200    | -0.365 |     |       |
|      |      |     |    |         |          |           |          |        |     |       |
| 1997 | 250  | 23  | 40 | 39.1149 | 35.43900 | 139.77000 | 105.5000 |        | 684 | 0.000 |
| WMD  | 1997 | 250 | 23 | 52      | 26.888   | P         | 0.200    | -0.104 |     |       |
| OVY  | 1997 | 250 | 23 | 52      | 26.228   | P         | 0.200    | 0.292  |     |       |
| MLAC | 1997 | 250 | 23 | 52      | 22.201   | P         | 0.200    | 0.800  |     |       |
| SLC  | 1997 | 250 | 23 | 52      | 28.845   | P         | 0.200    | -0.057 |     |       |
| SFT  | 1997 | 250 | 23 | 52      | 28.694   | P         | 0.200    | 0.046  |     |       |
| CPR  | 1997 | 250 | 23 | 52      | 24.917   | P         | 0.200    | -0.021 |     |       |
| SRF  | 1997 | 250 | 23 | 52      | 26.473   | P         | 0.200    | 0.261  |     |       |
| LMC  | 1997 | 250 | 23 | 52      | 24.015   | P         | 0.200    | -0.460 |     |       |
| SMD  | 1997 | 250 | 23 | 52      | 24.361   | P         | 0.200    | 0.175  |     |       |
| BRR  | 1997 | 250 | 23 | 52      | 22.653   | P         | 0.200    | -0.183 |     |       |
| TWR2 | 1997 | 250 | 23 | 52      | 26.860   | P         | 0.200    | -0.202 |     |       |
| FLL  | 1997 | 250 | 23 | 52      | 22.223   | P         | 0.200    | 0.260  |     |       |
| CCC  | 1997 | 250 | 23 | 52      | 24.899   | P         | 0.200    | 0.160  |     |       |
| CHP  | 1997 | 250 | 23 | 52      | 29.366   | P         | 0.200    | -0.345 |     |       |
| WHP  | 1997 | 250 | 23 | 52      | 27.071   | P         | 0.200    | 0.043  |     |       |
| ARC2 | 1997 | 250 | 23 | 52      | 28.120   | P         | 0.200    | -0.231 |     |       |
| SFK  | 1997 | 250 | 23 | 52      | 25.227   | P         | 0.200    | 0.021  |     |       |
| HVY  | 1997 | 250 | 23 | 52      | 21.808   | P         | 0.200    | -0.440 |     |       |
| BPC  | 1997 | 250 | 23 | 52      | 24.831   | P         | 0.200    | 0.421  |     |       |
| JUN  | 1997 | 250 | 23 | 52      | 26.358   | P         | 0.200    | -0.025 |     |       |
| MKW3 | 1997 | 250 | 23 | 52      | 25.955   | P         | 0.200    | 0.015  |     |       |
| DAC  | 1997 | 250 | 23 | 52      | 30.134   | P         | 0.200    | -0.138 |     |       |
| DP00 | 1997 | 250 | 23 | 52      | 29.996   | P         | 0.200    | 0.006  |     |       |
| PDC  | 1997 | 250 | 23 | 52      | 25.290   | P         | 0.200    | -0.293 |     |       |
|      |      |     |    |         |          |           |          |        |     |       |
| 1997 | 220  | 20  | 34 | 49.9072 | 35.70400 | 139.36400 | 67.8000  |        | 659 | 0.000 |
| WHP  | 1997 | 220 | 20 | 46      | 42.743   | P         | 0.200    | 0.049  |     |       |
| FLL  | 1997 | 220 | 20 | 46      | 37.934   | P         | 0.200    | 0.308  |     |       |
| LMC  | 1997 | 220 | 20 | 46      | 39.760   | P         | 0.200    | -0.407 |     |       |
| BPC  | 1997 | 220 | 20 | 46      | 40.539   | P         | 0.200    | 0.472  |     |       |
| TWR2 | 1997 | 220 | 20 | 46      | 42.544   | P         | 0.200    | -0.200 |     |       |
| CPR  | 1997 | 220 | 20 | 46      | 40.689   | P         | 0.200    | 0.080  |     |       |
| CCC  | 1997 | 220 | 20 | 46      | 40.582   | P         | 0.200    | 0.161  |     |       |
| HVY  | 1997 | 220 | 20 | 46      | 37.544   | P         | 0.200    | -0.389 |     |       |
| WMD  | 1997 | 220 | 20 | 46      | 42.580   | P         | 0.200    | -0.103 |     |       |
| DP00 | 1997 | 220 | 20 | 46      | 45.670   | P         | 0.200    | 0.004  |     |       |
| OVY  | 1997 | 220 | 20 | 46      | 41.846   | P         | 0.200    | 0.243  |     |       |
| JUN  | 1997 | 220 | 20 | 46      | 42.134   | P         | 0.200    | 0.075  |     |       |
| PDC  | 1997 | 220 | 20 | 46      | 40.995   | P         | 0.200    | -0.292 |     |       |
|      |      |     |    |         |          |           |          |        |     |       |
| 1997 | 248  | 10  | 31 | 36.6977 | 44.62200 | 150.00800 | 33.0000  |        | 681 | 0.000 |

|      |      |     |    |    |        |   |       |        |
|------|------|-----|----|----|--------|---|-------|--------|
| SLC  | 1997 | 248 | 10 | 42 | 25.920 | P | 0.200 | -0.008 |
| MLAC | 1997 | 248 | 10 | 42 | 17.943 | P | 0.200 | 0.854  |
| GPO  | 1997 | 248 | 10 | 42 | 29.324 | P | 0.200 | -0.100 |
| CCC  | 1997 | 248 | 10 | 42 | 21.380 | P | 0.200 | 0.065  |
| BRR  | 1997 | 248 | 10 | 42 | 18.812 | P | 0.200 | -0.218 |
| TIN  | 1997 | 248 | 10 | 42 | 22.290 | P | 0.200 | 0.556  |
| LMC  | 1997 | 248 | 10 | 42 | 20.591 | P | 0.200 | -0.547 |
| HVY  | 1997 | 248 | 10 | 42 | 18.180 | P | 0.200 | -0.343 |
| SRF  | 1997 | 248 | 10 | 42 | 23.012 | P | 0.200 | 0.263  |
| SFT  | 1997 | 248 | 10 | 42 | 25.784 | P | 0.200 | 0.009  |
| SMD  | 1997 | 248 | 10 | 42 | 20.624 | P | 0.200 | 0.153  |
| MKW3 | 1997 | 248 | 10 | 42 | 22.707 | P | 0.200 | 0.016  |
| CPR  | 1997 | 248 | 10 | 42 | 21.395 | P | 0.200 | -0.005 |
| WMD  | 1997 | 248 | 10 | 42 | 23.815 | P | 0.200 | -0.132 |
| BPC  | 1997 | 248 | 10 | 42 | 21.039 | P | 0.200 | 0.367  |
| DAC  | 1997 | 248 | 10 | 42 | 27.310 | P | 0.200 | -0.213 |
| WHP  | 1997 | 248 | 10 | 42 | 23.853 | P | 0.200 | 0.060  |
| DP00 | 1997 | 248 | 10 | 42 | 27.113 | P | 0.200 | -0.138 |
| SFK  | 1997 | 248 | 10 | 42 | 21.925 | P | 0.200 | -0.033 |
| JUN  | 1997 | 248 | 10 | 42 | 23.126 | P | 0.200 | 0.046  |
| FLL  | 1997 | 248 | 10 | 42 | 18.152 | P | 0.200 | 0.259  |
| TWR2 | 1997 | 248 | 10 | 42 | 23.821 | P | 0.200 | -0.134 |
| CHP  | 1997 | 248 | 10 | 42 | 26.676 | P | 0.200 | -0.428 |
| PDC  | 1997 | 248 | 10 | 42 | 22.207 | P | 0.200 | -0.350 |

|      |     |   |    |        |          |           |         |     |       |
|------|-----|---|----|--------|----------|-----------|---------|-----|-------|
| 1997 | 278 | 3 | 29 | 2.5031 | 45.50700 | 151.06599 | 71.3000 | 709 | 0.000 |
|------|-----|---|----|--------|----------|-----------|---------|-----|-------|

|      |      |     |   |    |        |   |       |        |
|------|------|-----|---|----|--------|---|-------|--------|
| CHP  | 1997 | 278 | 3 | 39 | 41.228 | P | 0.200 | -0.458 |
| SFK  | 1997 | 278 | 3 | 39 | 36.429 | P | 0.200 | -0.077 |
| DP00 | 1997 | 278 | 3 | 39 | 41.741 | P | 0.200 | -0.072 |
| WHP  | 1997 | 278 | 3 | 39 | 38.347 | P | 0.200 | 0.016  |
| MLAC | 1997 | 278 | 3 | 39 | 32.343 | P | 0.200 | 0.816  |
| BRR  | 1997 | 278 | 3 | 39 | 33.318 | P | 0.200 | -0.202 |
| SRF  | 1997 | 278 | 3 | 39 | 37.579 | P | 0.200 | 0.317  |
| TIN  | 1997 | 278 | 3 | 39 | 36.696 | P | 0.200 | 0.462  |
| OVY  | 1997 | 278 | 3 | 39 | 37.341 | P | 0.200 | 0.308  |
| CPR  | 1997 | 278 | 3 | 39 | 35.967 | P | 0.200 | 0.058  |
| SLC  | 1997 | 278 | 3 | 39 | 40.526 | P | 0.200 | 0.053  |
| CCC  | 1997 | 278 | 3 | 39 | 35.868 | P | 0.200 | 0.027  |
| BGR  | 1997 | 278 | 3 | 39 | 34.181 | P | 0.200 | -0.575 |
| BPC  | 1997 | 278 | 3 | 39 | 35.536 | P | 0.200 | 0.381  |
| SMD  | 1997 | 278 | 3 | 39 | 35.081 | P | 0.200 | 0.117  |
| FLL  | 1997 | 278 | 3 | 39 | 32.579 | P | 0.200 | 0.218  |
| HVY  | 1997 | 278 | 3 | 39 | 32.598 | P | 0.200 | -0.434 |
| WMD  | 1997 | 278 | 3 | 39 | 38.386 | P | 0.200 | -0.124 |
| CWC  | 1997 | 278 | 3 | 39 | 39.426 | P | 0.200 | 0.044  |
| ARC2 | 1997 | 278 | 3 | 39 | 39.883 | P | 0.200 | -0.261 |
| TWR2 | 1997 | 278 | 3 | 39 | 38.332 | P | 0.200 | -0.174 |
| JUN  | 1997 | 278 | 3 | 39 | 37.518 | P | 0.200 | -0.096 |
| PDC  | 1997 | 278 | 3 | 39 | 36.787 | P | 0.200 | -0.343 |

|      |     |    |    |        |          |           |         |     |       |
|------|-----|----|----|--------|----------|-----------|---------|-----|-------|
| 1997 | 281 | 21 | 21 | 1.6315 | 41.91100 | 144.81500 | 33.0000 | 722 | 0.000 |
|------|-----|----|----|--------|----------|-----------|---------|-----|-------|

|     |      |     |    |    |        |   |       |        |
|-----|------|-----|----|----|--------|---|-------|--------|
| PDC | 1997 | 281 | 21 | 32 | 16.128 | P | 0.200 | -0.317 |
| SLC | 1997 | 281 | 21 | 32 | 19.828 | P | 0.200 | 0.118  |
| CPR | 1997 | 281 | 21 | 32 | 15.483 | P | 0.200 | 0.074  |
| BRR | 1997 | 281 | 21 | 32 | 12.915 | P | 0.200 | -0.235 |
| SRF | 1997 | 281 | 21 | 32 | 16.995 | P | 0.200 | 0.292  |
| HVY | 1997 | 281 | 21 | 32 | 12.284 | P | 0.200 | -0.354 |
| SFT | 1997 | 281 | 21 | 32 | 19.684 | P | 0.200 | 0.131  |
| WMD | 1997 | 281 | 21 | 32 | 17.703 | P | 0.200 | -0.116 |
| WHP | 1997 | 281 | 21 | 32 | 17.773 | P | 0.200 | 0.079  |
| SFK | 1997 | 281 | 21 | 32 | 15.899 | P | 0.200 | -0.002 |
| BPC | 1997 | 281 | 21 | 32 | 15.181 | P | 0.200 | 0.459  |
| JUN | 1997 | 281 | 21 | 32 | 17.079 | P | 0.200 | 0.065  |

|      |      |     |    |    |        |   |       |        |
|------|------|-----|----|----|--------|---|-------|--------|
| BGR  | 1997 | 281 | 21 | 32 | 13.879 | P | 0.200 | -0.412 |
| SMD  | 1997 | 281 | 21 | 32 | 14.715 | P | 0.200 | 0.182  |
| MKW3 | 1997 | 281 | 21 | 32 | 16.714 | P | 0.200 | 0.094  |
| TWR2 | 1997 | 281 | 21 | 32 | 17.666 | P | 0.200 | -0.167 |
| CHP  | 1997 | 281 | 21 | 32 | 20.497 | P | 0.200 | -0.308 |
| OVY  | 1997 | 281 | 21 | 32 | 16.851 | P | 0.200 | 0.379  |
| DAC  | 1997 | 281 | 21 | 32 | 21.084 | P | 0.200 | -0.142 |
| ARC2 | 1997 | 281 | 21 | 32 | 19.189 | P | 0.200 | -0.153 |
| DP00 | 1997 | 281 | 21 | 32 | 20.943 | P | 0.200 | -0.011 |
| FLL  | 1997 | 281 | 21 | 32 | 12.433 | P | 0.200 | 0.344  |

|      |     |   |    |         |          |           |         |     |       |
|------|-----|---|----|---------|----------|-----------|---------|-----|-------|
| 1997 | 176 | 9 | 50 | 13.8702 | 34.39500 | 131.60300 | 10.0000 | 610 | 0.000 |
|------|-----|---|----|---------|----------|-----------|---------|-----|-------|

|      |      |     |    |   |        |   |       |        |
|------|------|-----|----|---|--------|---|-------|--------|
| SRF  | 1997 | 176 | 10 | 2 | 44.572 | P | 0.200 | 0.403  |
| MLAC | 1997 | 176 | 10 | 2 | 40.302 | P | 0.200 | 0.643  |
| SMD  | 1997 | 176 | 10 | 2 | 42.632 | P | 0.200 | 0.266  |
| CWC  | 1997 | 176 | 10 | 2 | 45.794 | P | 0.200 | -0.048 |
| OVY  | 1997 | 176 | 10 | 2 | 44.371 | P | 0.200 | 0.388  |
| LMC  | 1997 | 176 | 10 | 2 | 42.355 | P | 0.200 | -0.459 |
| FLL  | 1997 | 176 | 10 | 2 | 40.586 | P | 0.200 | 0.304  |
| WMD  | 1997 | 176 | 10 | 2 | 44.933 | P | 0.200 | -0.232 |
| JUN  | 1997 | 176 | 10 | 2 | 44.435 | P | 0.200 | -0.056 |
| TWR2 | 1997 | 176 | 10 | 2 | 44.984 | P | 0.200 | -0.175 |
| CPR  | 1997 | 176 | 10 | 2 | 42.665 | P | 0.200 | -0.446 |
| DP00 | 1997 | 176 | 10 | 2 | 47.792 | P | 0.200 | 0.051  |
| BPC  | 1997 | 176 | 10 | 2 | 43.017 | P | 0.200 | 0.518  |
| HVY  | 1997 | 176 | 10 | 2 | 40.314 | P | 0.200 | -0.393 |
| SFT  | 1997 | 176 | 10 | 2 | 47.020 | P | 0.200 | 0.436  |
| BVC  | 1997 | 176 | 10 | 2 | 45.568 | P | 0.200 | 0.154  |
| BGR  | 1997 | 176 | 10 | 2 | 41.782 | P | 0.200 | -0.374 |
| DAC  | 1997 | 176 | 10 | 2 | 47.859 | P | 0.200 | -0.159 |
| WHP  | 1997 | 176 | 10 | 2 | 45.067 | P | 0.200 | 0.033  |
| CHP  | 1997 | 176 | 10 | 2 | 47.299 | P | 0.200 | -0.368 |
| SFK  | 1997 | 176 | 10 | 2 | 43.425 | P | 0.200 | -0.034 |
| PDC  | 1997 | 176 | 10 | 2 | 43.456 | P | 0.200 | -0.450 |

|      |     |    |    |         |          |            |         |     |       |
|------|-----|----|----|---------|----------|------------|---------|-----|-------|
| 1997 | 189 | 12 | 11 | 16.8324 | 51.37200 | -178.58200 | 33.0000 | 626 | 0.000 |
|------|-----|----|----|---------|----------|------------|---------|-----|-------|

|      |      |     |    |    |        |   |       |        |
|------|------|-----|----|----|--------|---|-------|--------|
| BPC  | 1997 | 189 | 12 | 19 | 22.553 | P | 0.200 | 0.449  |
| CPR  | 1997 | 189 | 12 | 19 | 23.249 | P | 0.200 | 0.279  |
| OVY  | 1997 | 189 | 12 | 19 | 24.679 | P | 0.200 | 0.291  |
| JUN  | 1997 | 189 | 12 | 19 | 25.059 | P | 0.200 | 0.047  |
| WHP  | 1997 | 189 | 12 | 19 | 26.113 | P | 0.200 | 0.196  |
| BRR  | 1997 | 189 | 12 | 19 | 20.100 | P | 0.200 | 0.057  |
| TWR2 | 1997 | 189 | 12 | 19 | 25.045 | P | 0.200 | -1.083 |
| PDC  | 1997 | 189 | 12 | 19 | 24.320 | P | 0.200 | -0.265 |
| SMD  | 1997 | 189 | 12 | 19 | 22.100 | P | 0.200 | 0.279  |
| CHP  | 1997 | 189 | 12 | 19 | 29.729 | P | 0.200 | -0.320 |
| FLL  | 1997 | 189 | 12 | 19 | 19.036 | P | 0.200 | 0.408  |
| WMD  | 1997 | 189 | 12 | 19 | 26.237 | P | 0.200 | 0.117  |
| BVC  | 1997 | 189 | 12 | 19 | 26.897 | P | 0.200 | 0.163  |
| BGR  | 1997 | 189 | 12 | 19 | 21.202 | P | 0.200 | -0.350 |
| LMC  | 1997 | 189 | 12 | 19 | 22.312 | P | 0.200 | -0.433 |
| CWC  | 1997 | 189 | 12 | 19 | 27.416 | P | 0.200 | 0.175  |
| SFT  | 1997 | 189 | 12 | 19 | 28.614 | P | 0.200 | 0.185  |
| SFK  | 1997 | 189 | 12 | 19 | 23.742 | P | 0.200 | -0.055 |
| SLC  | 1997 | 189 | 12 | 19 | 28.735 | P | 0.200 | 0.098  |
| SRF  | 1997 | 189 | 12 | 19 | 24.985 | P | 0.200 | 0.315  |
| DP00 | 1997 | 189 | 12 | 19 | 30.215 | P | 0.200 | -0.057 |
| HVY  | 1997 | 189 | 12 | 19 | 19.163 | P | 0.200 | -0.352 |
| DAC  | 1997 | 189 | 12 | 19 | 30.398 | P | 0.200 | -0.143 |

|      |     |    |   |         |          |            |         |     |       |
|------|-----|----|---|---------|----------|------------|---------|-----|-------|
| 1997 | 168 | 21 | 3 | 42.4373 | 51.34700 | -179.33200 | 33.0000 | 604 | 0.000 |
|------|-----|----|---|---------|----------|------------|---------|-----|-------|

|     |      |     |    |    |        |   |       |        |
|-----|------|-----|----|----|--------|---|-------|--------|
| DAC | 1997 | 168 | 21 | 11 | 59.655 | P | 0.200 | -0.220 |
| TIN | 1997 | 168 | 21 | 11 | 53.259 | P | 0.200 | 0.518  |

|      |      |     |    |    |        |   |       |        |
|------|------|-----|----|----|--------|---|-------|--------|
| GSC  | 1997 | 168 | 21 | 12 | 8.344  | P | 0.200 | -0.104 |
| PDC  | 1997 | 168 | 21 | 11 | 53.703 | P | 0.200 | -0.234 |
| BPC  | 1997 | 168 | 21 | 11 | 51.844 | P | 0.200 | 0.379  |
| WMD  | 1997 | 168 | 21 | 11 | 55.514 | P | 0.200 | 0.049  |
| OVY  | 1997 | 168 | 21 | 11 | 53.911 | P | 0.200 | 0.171  |
| BVC  | 1997 | 168 | 21 | 11 | 56.118 | P | 0.200 | 0.043  |
| CPR  | 1997 | 168 | 21 | 11 | 51.688 | P | 0.200 | -0.642 |
| CHP  | 1997 | 168 | 21 | 11 | 59.040 | P | 0.200 | -0.346 |
| WHP  | 1997 | 168 | 21 | 11 | 55.240 | P | 0.200 | -0.026 |
| HVY  | 1997 | 168 | 21 | 11 | 48.516 | P | 0.200 | -0.374 |
| DP00 | 1997 | 168 | 21 | 11 | 59.473 | P | 0.200 | -0.132 |
| LMC  | 1997 | 168 | 21 | 11 | 51.652 | P | 0.200 | -0.455 |
| SFT  | 1997 | 168 | 21 | 11 | 58.181 | P | 0.200 | 0.411  |
| FLL  | 1997 | 168 | 21 | 11 | 48.292 | P | 0.200 | 0.285  |
| SRF  | 1997 | 168 | 21 | 11 | 54.165 | P | 0.200 | 0.146  |
| BGR  | 1997 | 168 | 21 | 11 | 50.547 | P | 0.200 | -0.371 |
| CWC  | 1997 | 168 | 21 | 11 | 56.687 | P | 0.200 | 0.105  |
| MLAC | 1997 | 168 | 21 | 11 | 47.776 | P | 0.200 | 0.798  |

|      |     |    |   |         |          |           |         |     |       |
|------|-----|----|---|---------|----------|-----------|---------|-----|-------|
| 1997 | 195 | 16 | 9 | 37.6437 | 43.24900 | 146.38100 | 33.0000 | 633 | 0.000 |
|------|-----|----|---|---------|----------|-----------|---------|-----|-------|

|      |      |     |    |    |        |   |       |        |
|------|------|-----|----|----|--------|---|-------|--------|
| JUN  | 1997 | 195 | 16 | 20 | 42.671 | P | 0.200 | 0.006  |
| BRR  | 1997 | 195 | 16 | 20 | 38.636 | P | 0.200 | -0.100 |
| CPR  | 1997 | 195 | 16 | 20 | 41.190 | P | 0.200 | 0.158  |
| SMD  | 1997 | 195 | 16 | 20 | 40.348 | P | 0.200 | 0.216  |
| SRF  | 1997 | 195 | 16 | 20 | 42.808 | P | 0.200 | 0.481  |
| LMC  | 1997 | 195 | 16 | 20 | 40.394 | P | 0.200 | -0.385 |
| OVY  | 1997 | 195 | 16 | 20 | 42.472 | P | 0.200 | 0.368  |
| BGR  | 1997 | 195 | 16 | 20 | 39.537 | P | 0.200 | -0.374 |
| BPC  | 1997 | 195 | 16 | 20 | 40.804 | P | 0.200 | 0.490  |
| CWC  | 1997 | 195 | 16 | 20 | 44.498 | P | 0.200 | 0.152  |
| GPO  | 1997 | 195 | 16 | 20 | 48.796 | P | 0.200 | 0.022  |
| FLL  | 1997 | 195 | 16 | 20 | 37.962 | P | 0.200 | 0.325  |
| ARC2 | 1997 | 195 | 16 | 20 | 44.905 | P | 0.200 | -0.155 |
| BVC  | 1997 | 195 | 16 | 20 | 44.062 | P | 0.200 | 0.176  |
| SLC  | 1997 | 195 | 16 | 20 | 45.560 | P | 0.200 | 0.158  |
| WHP  | 1997 | 195 | 16 | 20 | 43.472 | P | 0.200 | 0.120  |
| SFT  | 1997 | 195 | 16 | 20 | 45.386 | P | 0.200 | 0.125  |
| SFK  | 1997 | 195 | 16 | 20 | 41.649 | P | 0.200 | 0.081  |
| DAC  | 1997 | 195 | 16 | 20 | 46.852 | P | 0.200 | -0.099 |
| DP00 | 1997 | 195 | 16 | 20 | 46.760 | P | 0.200 | 0.080  |
| WMD  | 1997 | 195 | 16 | 20 | 43.535 | P | 0.200 | 0.032  |
| TWR2 | 1997 | 195 | 16 | 20 | 42.286 | P | 0.200 | -1.220 |
| HVY  | 1997 | 195 | 16 | 20 | 37.867 | P | 0.200 | -0.378 |
| PDC  | 1997 | 195 | 16 | 20 | 41.862 | P | 0.200 | -0.279 |

|      |     |   |    |         |          |            |         |     |       |
|------|-----|---|----|---------|----------|------------|---------|-----|-------|
| 1997 | 201 | 0 | 30 | 23.4148 | 52.56200 | -167.48399 | 14.4000 | 639 | 0.000 |
|------|-----|---|----|---------|----------|------------|---------|-----|-------|

|      |      |     |   |    |        |   |       |        |
|------|------|-----|---|----|--------|---|-------|--------|
| GPO  | 1997 | 201 | 0 | 37 | 46.066 | P | 0.200 | -0.352 |
| CPR  | 1997 | 201 | 0 | 37 | 35.653 | P | 0.200 | 0.100  |
| WHP  | 1997 | 201 | 0 | 37 | 38.824 | P | 0.200 | 0.163  |
| BRR  | 1997 | 201 | 0 | 37 | 32.478 | P | 0.200 | -0.016 |
| BPC  | 1997 | 201 | 0 | 37 | 35.016 | P | 0.200 | 0.461  |
| BVC  | 1997 | 201 | 0 | 37 | 39.546 | P | 0.200 | 0.072  |
| TWR2 | 1997 | 201 | 0 | 37 | 38.897 | P | 0.200 | -0.062 |
| CCC  | 1997 | 201 | 0 | 37 | 35.588 | P | 0.200 | -0.023 |
| WMD  | 1997 | 201 | 0 | 37 | 39.444 | P | 0.200 | 0.431  |
| OVY  | 1997 | 201 | 0 | 37 | 37.330 | P | 0.200 | 0.307  |
| DP00 | 1997 | 201 | 0 | 37 | 43.226 | P | 0.200 | -0.046 |
| SMD  | 1997 | 201 | 0 | 37 | 34.559 | P | 0.200 | 0.254  |
| ARC2 | 1997 | 201 | 0 | 37 | 41.181 | P | 0.200 | -0.071 |
| FLL  | 1997 | 201 | 0 | 37 | 31.291 | P | 0.200 | 0.383  |
| SFK  | 1997 | 201 | 0 | 37 | 36.430 | P | 0.200 | -0.147 |
| JUN  | 1997 | 201 | 0 | 37 | 37.746 | P | 0.200 | 0.025  |
| SLC  | 1997 | 201 | 0 | 37 | 41.557 | P | 0.200 | 0.046  |



|      |      |     |    |    |         |           |            |          |     |       |
|------|------|-----|----|----|---------|-----------|------------|----------|-----|-------|
| SFT  | 1997 | 201 | 0  | 37 | 41.579  | P         | 0.200      | 0.198    |     |       |
| BGR  | 1997 | 201 | 0  | 37 | 33.677  | P         | 0.200      | -0.472   |     |       |
| LMC  | 1997 | 201 | 0  | 37 | 34.924  | P         | 0.200      | -0.566   |     |       |
| HVY  | 1997 | 201 | 0  | 37 | 31.553  | P         | 0.200      | -0.483   |     |       |
| DAC  | 1997 | 201 | 0  | 37 | 43.362  | P         | 0.200      | -0.176   |     |       |
| SRF  | 1997 | 201 | 0  | 37 | 37.593  | P         | 0.200      | 0.331    |     |       |
| PDC  | 1997 | 201 | 0  | 37 | 37.158  | P         | 0.200      | -0.358   |     |       |
|      |      |     |    |    |         |           |            |          |     |       |
| 1997 | 282  | 20  | 42 |    | 3.8424  | 41.98000  | 138.86099  | 33.0000  | 725 | 0.000 |
| CHP  | 1997 | 282 | 20 | 53 | 44.140  | P         | 0.200      | -0.435   |     |       |
| MLAC | 1997 | 282 | 20 | 53 | 36.032  | P         | 0.200      | 0.771    |     |       |
| SLC  | 1997 | 282 | 20 | 53 | 43.384  | P         | 0.200      | 0.052    |     |       |
| OVY  | 1997 | 282 | 20 | 53 | 40.684  | P         | 0.200      | 0.415    |     |       |
| SRF  | 1997 | 282 | 20 | 53 | 40.754  | P         | 0.200      | 0.323    |     |       |
| CWC  | 1997 | 282 | 20 | 53 | 42.444  | P         | 0.200      | 0.026    |     |       |
| BRR  | 1997 | 282 | 20 | 53 | 36.960  | P         | 0.200      | -0.206   |     |       |
| MKW3 | 1997 | 282 | 20 | 53 | 40.546  | P         | 0.200      | 0.023    |     |       |
| CPR  | 1997 | 282 | 20 | 53 | 39.441  | P         | 0.200      | 0.137    |     |       |
| TIN  | 1997 | 282 | 20 | 53 | 40.067  | P         | 0.200      | 0.549    |     |       |
| ARC2 | 1997 | 282 | 20 | 53 | 42.852  | P         | 0.200      | -0.312   |     |       |
| BPC  | 1997 | 282 | 20 | 53 | 38.931  | P         | 0.200      | 0.385    |     |       |
| CCC  | 1997 | 282 | 20 | 53 | 39.285  | P         | 0.200      | 0.027    |     |       |
| WHP  | 1997 | 282 | 20 | 53 | 41.531  | P         | 0.200      | 0.065    |     |       |
| JUN  | 1997 | 282 | 20 | 53 | 40.796  | P         | 0.200      | -0.070   |     |       |
| BGR  | 1997 | 282 | 20 | 53 | 37.829  | P         | 0.200      | -0.486   |     |       |
| WMD  | 1997 | 282 | 20 | 53 | 41.534  | P         | 0.200      | -0.199   |     |       |
| FLL  | 1997 | 282 | 20 | 53 | 36.291  | P         | 0.200      | 0.231    |     |       |
| PDC  | 1997 | 282 | 20 | 53 | 40.039  | P         | 0.200      | -0.435   |     |       |
| TWR2 | 1997 | 282 | 20 | 53 | 41.440  | P         | 0.200      | -0.248   |     |       |
| HVY  | 1997 | 282 | 20 | 53 | 36.268  | P         | 0.200      | -0.466   |     |       |
| SFK  | 1997 | 282 | 20 | 53 | 39.798  | P         | 0.200      | -0.069   |     |       |
| DP00 | 1997 | 282 | 20 | 53 | 44.485  | P         | 0.200      | -0.076   |     |       |
|      |      |     |    |    |         |           |            |          |     |       |
| 1997 | 274  | 6   | 5  |    | 50.2815 | 46.21500  | 136.09000  | 416.0000 | 702 | 0.000 |
| HVY  | 1997 | 274 | 6  | 16 | 37.120  | P         | 0.200      | -0.551   |     |       |
| MLAC | 1997 | 274 | 6  | 16 | 36.510  | P         | 0.200      | 0.740    |     |       |
| CPR  | 1997 | 274 | 6  | 16 | 39.946  | P         | 0.200      | -0.052   |     |       |
| TIN  | 1997 | 274 | 6  | 16 | 40.588  | P         | 0.200      | 0.575    |     |       |
| OVY  | 1997 | 274 | 6  | 16 | 41.169  | P         | 0.200      | 0.298    |     |       |
| LMC  | 1997 | 274 | 6  | 16 | 39.596  | P         | 0.200      | -0.505   |     |       |
| SMD  | 1997 | 274 | 6  | 16 | 39.201  | P         | 0.200      | 0.140    |     |       |
| FLL  | 1997 | 274 | 6  | 16 | 36.970  | P         | 0.200      | 0.245    |     |       |
| BRR  | 1997 | 274 | 6  | 16 | 37.723  | P         | 0.200      | -0.239   |     |       |
| BPC  | 1997 | 274 | 6  | 16 | 39.490  | P         | 0.200      | 0.406    |     |       |
| SLC  | 1997 | 274 | 6  | 16 | 43.859  | P         | 0.200      | 0.033    |     |       |
| ARC2 | 1997 | 274 | 6  | 16 | 43.818  | P         | 0.200      | -0.172   |     |       |
| SFT  | 1997 | 274 | 6  | 16 | 43.974  | P         | 0.200      | 0.001    |     |       |
| TWR2 | 1997 | 274 | 6  | 16 | 42.227  | P         | 0.200      | -0.227   |     |       |
| WMD  | 1997 | 274 | 6  | 16 | 42.419  | P         | 0.200      | -0.179   |     |       |
| JUN  | 1997 | 274 | 6  | 16 | 41.565  | P         | 0.200      | -0.005   |     |       |
| PDC  | 1997 | 274 | 6  | 16 | 41.099  | P         | 0.200      | -0.405   |     |       |
| WHP  | 1997 | 274 | 6  | 16 | 42.140  | P         | 0.200      | 0.043    |     |       |
| CHP  | 1997 | 274 | 6  | 16 | 45.066  | P         | 0.200      | -0.317   |     |       |
| DP00 | 1997 | 274 | 6  | 16 | 45.113  | P         | 0.200      | 0.007    |     |       |
| SFK  | 1997 | 274 | 6  | 16 | 40.707  | P         | 0.200      | -0.039   |     |       |
| SRF  | 1997 | 274 | 6  | 16 | 41.223  | P         | 0.200      | 0.302    |     |       |
| CWC  | 1997 | 274 | 6  | 16 | 42.955  | P         | 0.200      | -0.099   |     |       |
|      |      |     |    |    |         |           |            |          |     |       |
| 1997 | 161  | 21  | 54 |    | 1.2847  | -35.81500 | -108.13500 | 10.0000  | 1   | 6.265 |
| CPR  | 1997 | 161 | 22 | 14 | 55.886  | F         | 0.500      | -1.333   |     |       |
| DGR  | 1997 | 161 | 22 | 14 | 19.909  | F         | 0.500      | 0.832    |     |       |
| HVY  | 1997 | 161 | 22 | 14 | 55.574  | F         | 0.500      | -1.346   |     |       |
| SFT  | 1997 | 161 | 22 | 14 | 51.064  | F         | 0.500      | 0.844    |     |       |

|      |      |     |    |    |         |           |            |         |   |         |
|------|------|-----|----|----|---------|-----------|------------|---------|---|---------|
| CALB | 1997 | 161 | 22 | 14 | 26.994  | F         | 0.500      | 0.146   |   |         |
| ARC2 | 1997 | 161 | 22 | 14 | 48.702  | F         | 0.500      | 0.450   |   |         |
| WHP  | 1997 | 161 | 22 | 14 | 54.813  | F         | 0.500      | 0.252   |   |         |
| BMN  | 1997 | 161 | 22 | 15 | 34.453  | F         | 0.500      | -0.869  |   |         |
| CMB  | 1997 | 161 | 22 | 15 | 14.355  | F         | 0.500      | 0.770   |   |         |
| WMD  | 1997 | 161 | 22 | 14 | 50.556  | F         | 0.500      | -0.198  |   |         |
| TPNV | 1997 | 161 | 22 | 14 | 57.313  | F         | 0.500      | 1.505   |   |         |
| DAC  | 1997 | 161 | 22 | 14 | 50.674  | F         | 0.500      | 0.605   |   |         |
| GSC  | 1997 | 161 | 22 | 14 | 38.301  | F         | 0.500      | 0.435   |   |         |
| TPH  | 1997 | 161 | 22 | 15 | 10.311  | F         | 0.500      | 0.735   |   |         |
| LMC  | 1997 | 161 | 22 | 14 | 51.264  | F         | 0.500      | -1.308  |   |         |
| BGR  | 1997 | 161 | 22 | 14 | 54.378  | F         | 0.500      | -1.321  |   |         |
| SRF  | 1997 | 161 | 22 | 14 | 58.158  | F         | 0.500      | -0.267  |   |         |
| OVY  | 1997 | 161 | 22 | 14 | 56.832  | F         | 0.500      | -0.142  |   |         |
| BPC  | 1997 | 161 | 22 | 15 | 1.295   | F         | 0.500      | 0.211   |   |         |
|      |      |     |    |    |         |           |            |         |   |         |
| 1997 | 168  | 21  | 3  |    | 0.2685  | 51.34700  | -179.33200 | 33.0000 | 2 | -39.992 |
| LMC  | 1997 | 168 | 21 | 17 | 44.138  | F         | 0.500      | -0.648  |   |         |
| PFO  | 1997 | 168 | 21 | 18 | 32.896  | F         | 0.500      | -0.640  |   |         |
| WMD  | 1997 | 168 | 21 | 17 | 51.057  | F         | 0.500      | 0.189   |   |         |
| WHP  | 1997 | 168 | 21 | 17 | 50.739  | F         | 0.500      | 0.241   |   |         |
| DP00 | 1997 | 168 | 21 | 17 | 58.749  | F         | 0.500      | 0.322   |   |         |
| BGR  | 1997 | 168 | 21 | 17 | 42.117  | F         | 0.500      | -0.483  |   |         |
| DGR  | 1997 | 168 | 21 | 18 | 27.716  | F         | 0.500      | -0.312  |   |         |
| SFT  | 1997 | 168 | 21 | 17 | 55.514  | F         | 0.500      | 0.435   |   |         |
| VTV  | 1997 | 168 | 21 | 18 | 17.086  | F         | 0.500      | 0.367   |   |         |
| DAC  | 1997 | 168 | 21 | 17 | 58.331  | F         | 0.500      | -0.561  |   |         |
| CHP  | 1997 | 168 | 21 | 17 | 57.693  | F         | 0.500      | -0.315  |   |         |
| CMB  | 1997 | 168 | 21 | 17 | 18.612  | F         | 0.500      | 1.406   |   |         |
|      |      |     |    |    |         |           |            |         |   |         |
| 1997 | 176  | 3   | 53 |    | 46.2957 | -16.01800 | -173.04700 | 33.0000 | 3 | -25.944 |
| FLL  | 1997 | 176 | 4  | 14 | 44.554  | F         | 0.500      | 0.805   |   |         |
| SMD  | 1997 | 176 | 4  | 14 | 44.125  | F         | 0.500      | -0.025  |   |         |
| OVY  | 1997 | 176 | 4  | 14 | 45.239  | F         | 0.500      | -0.269  |   |         |
| BPC  | 1997 | 176 | 4  | 14 | 47.864  | F         | 0.500      | 0.985   |   |         |
| SFK  | 1997 | 176 | 4  | 14 | 37.694  | F         | 0.500      | -0.874  |   |         |
| CPR  | 1997 | 176 | 4  | 14 | 42.086  | F         | 0.500      | -1.495  |   |         |
| DP00 | 1997 | 176 | 4  | 14 | 48.349  | F         | 0.500      | 1.329   |   |         |
| CMB  | 1997 | 176 | 4  | 14 | 39.081  | F         | 0.500      | 0.881   |   |         |
| CWC  | 1997 | 176 | 4  | 14 | 45.737  | F         | 0.500      | 0.675   |   |         |
| BGR  | 1997 | 176 | 4  | 14 | 38.228  | F         | 0.500      | -0.708  |   |         |
| JUN  | 1997 | 176 | 4  | 14 | 43.547  | F         | 0.500      | -0.095  |   |         |
| CHP  | 1997 | 176 | 4  | 14 | 42.624  | F         | 0.500      | 1.021   |   |         |
| HVY  | 1997 | 176 | 4  | 14 | 34.884  | F         | 0.500      | -2.233  |   |         |
|      |      |     |    |    |         |           |            |         |   |         |
| 1997 | 177  | 6   | 12 |    | 18.0980 | 4.86800   | -82.61100  | 10.0000 | 4 | 7.718   |
| GSC  | 1997 | 177 | 6  | 26 | 54.999  | F         | 0.500      | 0.367   |   |         |
| PFO  | 1997 | 177 | 6  | 26 | 37.454  | F         | 0.500      | 0.439   |   |         |
| SRF  | 1997 | 177 | 6  | 27 | 20.448  | F         | 0.500      | -0.655  |   |         |
| CWC  | 1997 | 177 | 6  | 27 | 18.328  | F         | 0.500      | 1.751   |   |         |
| WMD  | 1997 | 177 | 6  | 27 | 19.156  | F         | 0.500      | -0.429  |   |         |
| TWR2 | 1997 | 177 | 6  | 27 | 19.123  | F         | 0.500      | 0.100   |   |         |
| VTV  | 1997 | 177 | 6  | 26 | 54.240  | F         | 0.500      | 0.690   |   |         |
| SFK  | 1997 | 177 | 6  | 27 | 21.780  | F         | 0.500      | -1.031  |   |         |
| BGR  | 1997 | 177 | 6  | 27 | 25.453  | F         | 0.500      | -1.357  |   |         |
| DP00 | 1997 | 177 | 6  | 27 | 11.365  | F         | 0.500      | 0.357   |   |         |
| CHP  | 1997 | 177 | 6  | 27 | 12.869  | F         | 0.500      | 0.522   |   |         |
| BVC  | 1997 | 177 | 6  | 27 | 18.049  | F         | 0.500      | 1.444   |   |         |
| CPR  | 1997 | 177 | 6  | 27 | 22.734  | F         | 0.500      | -1.490  |   |         |
| SMD  | 1997 | 177 | 6  | 27 | 25.696  | F         | 0.500      | -0.543  |   |         |
| JUN  | 1997 | 177 | 6  | 27 | 20.934  | F         | 0.500      | -0.166  |   |         |
|      |      |     |    |    |         |           |            |         |   |         |
| 1997 | 178  | 4   | 39 |    | 58.0327 | 38.33400  | -26.68400  | 10.0000 | 5 | 5.313   |

|      |      |     |   |   |        |   |       |        |
|------|------|-----|---|---|--------|---|-------|--------|
| BVC  | 1997 | 178 | 5 | 0 | 11.937 | F | 0.500 | 0.130  |
| BGR  | 1997 | 178 | 5 | 0 | 20.500 | F | 0.500 | -1.190 |
| WMD  | 1997 | 178 | 5 | 0 | 20.744 | F | 0.500 | -0.479 |
| GSC  | 1997 | 178 | 5 | 0 | 13.737 | F | 0.500 | 1.290  |
| CPR  | 1997 | 178 | 5 | 0 | 15.438 | F | 0.500 | -1.721 |
| VTV  | 1997 | 178 | 5 | 0 | 22.247 | F | 0.500 | 0.676  |
| FLL  | 1997 | 178 | 5 | 0 | 17.845 | F | 0.500 | 0.330  |
| SMD  | 1997 | 178 | 5 | 0 | 16.145 | F | 0.500 | -0.563 |
| CMB  | 1997 | 178 | 5 | 0 | 23.253 | F | 0.500 | 0.037  |
| JUN  | 1997 | 178 | 5 | 0 | 16.825 | F | 0.500 | -0.684 |
| DP00 | 1997 | 178 | 5 | 0 | 14.114 | F | 0.500 | 0.735  |
| CHP  | 1997 | 178 | 5 | 0 | 19.868 | F | 0.500 | 0.526  |
| WHP  | 1997 | 178 | 5 | 0 | 15.424 | F | 0.500 | -0.480 |
| PFO  | 1997 | 178 | 5 | 0 | 22.137 | F | 0.500 | 1.684  |
| TWR2 | 1997 | 178 | 5 | 0 | 18.574 | F | 0.500 | -0.228 |
| SFT  | 1997 | 178 | 5 | 0 | 17.520 | F | 0.500 | 0.769  |
| SFK  | 1997 | 178 | 5 | 0 | 20.905 | F | 0.500 | -0.834 |
| BPC  | 1997 | 178 | 5 | 0 | 14.159 | F | 0.500 | 0.001  |

|      |     |    |    |         |          |            |        |   |       |
|------|-----|----|----|---------|----------|------------|--------|---|-------|
| 1997 | 181 | 15 | 47 | 44.6738 | 19.35800 | -155.06799 | 7.5000 | 6 | 5.174 |
|------|-----|----|----|---------|----------|------------|--------|---|-------|

|      |      |     |    |   |        |   |       |        |
|------|------|-----|----|---|--------|---|-------|--------|
| SMD  | 1997 | 181 | 16 | 0 | 31.301 | F | 0.500 | 0.173  |
| SFK  | 1997 | 181 | 16 | 0 | 25.112 | F | 0.500 | -0.808 |
| CPR  | 1997 | 181 | 16 | 0 | 29.925 | F | 0.500 | -1.020 |
| JUN  | 1997 | 181 | 16 | 0 | 31.901 | F | 0.500 | -0.146 |
| BPC  | 1997 | 181 | 16 | 0 | 35.628 | F | 0.500 | 1.163  |
| CMB  | 1997 | 181 | 16 | 0 | 13.703 | F | 0.500 | -2.865 |
| TPH  | 1997 | 181 | 16 | 0 | 52.809 | F | 0.500 | 0.070  |
| TWR2 | 1997 | 181 | 16 | 0 | 30.517 | F | 0.500 | -0.384 |
| TPNV | 1997 | 181 | 16 | 0 | 58.125 | F | 0.500 | -0.549 |
| WMD  | 1997 | 181 | 16 | 0 | 27.776 | F | 0.500 | -0.687 |
| HVY  | 1997 | 181 | 16 | 0 | 19.735 | F | 0.500 | -2.041 |
| FLL  | 1997 | 181 | 16 | 0 | 29.723 | F | 0.500 | 0.824  |
| LMC  | 1997 | 181 | 16 | 0 | 21.367 | F | 0.500 | -1.887 |
| GSC  | 1997 | 181 | 16 | 0 | 46.443 | F | 0.500 | 1.159  |
| BGR  | 1997 | 181 | 16 | 0 | 24.280 | F | 0.500 | -0.509 |
| CHP  | 1997 | 181 | 16 | 0 | 33.128 | F | 0.500 | 0.461  |
| SRF  | 1997 | 181 | 16 | 0 | 38.686 | F | 0.500 | 1.503  |
| OVY  | 1997 | 181 | 16 | 0 | 34.401 | F | 0.500 | 0.276  |
| BVC  | 1997 | 181 | 16 | 0 | 40.509 | F | 0.500 | 1.887  |
| DP00 | 1997 | 181 | 16 | 0 | 41.055 | F | 0.500 | 1.627  |
| DAC  | 1997 | 181 | 16 | 0 | 41.504 | F | 0.500 | 1.479  |
| WHP  | 1997 | 181 | 16 | 0 | 34.592 | F | 0.500 | 0.276  |

|      |     |    |    |         |          |           |         |   |       |
|------|-----|----|----|---------|----------|-----------|---------|---|-------|
| 1997 | 181 | 18 | 56 | 33.6384 | -4.16100 | -80.92600 | 33.0000 | 7 | 6.158 |
|------|-----|----|----|---------|----------|-----------|---------|---|-------|

|      |      |     |    |    |        |   |       |        |
|------|------|-----|----|----|--------|---|-------|--------|
| SFK  | 1997 | 181 | 19 | 13 | 23.841 | F | 0.500 | -0.362 |
| TWR2 | 1997 | 181 | 19 | 13 | 21.443 | F | 0.500 | 0.500  |
| BMN  | 1997 | 181 | 19 | 13 | 47.164 | F | 0.500 | -1.346 |
| PFO  | 1997 | 181 | 19 | 12 | 40.434 | F | 0.500 | 0.820  |
| FLL  | 1997 | 181 | 19 | 13 | 33.295 | F | 0.500 | -0.573 |
| CMB  | 1997 | 181 | 19 | 13 | 51.112 | F | 0.500 | -0.485 |
| BVC  | 1997 | 181 | 19 | 13 | 20.949 | F | 0.500 | 1.570  |
| BPC  | 1997 | 181 | 19 | 13 | 28.768 | F | 0.500 | 0.573  |
| WHP  | 1997 | 181 | 19 | 13 | 21.881 | F | 0.500 | 0.331  |
| BGR  | 1997 | 181 | 19 | 13 | 27.320 | F | 0.500 | -0.819 |
| GSC  | 1997 | 181 | 19 | 12 | 58.319 | F | 0.500 | 0.346  |
| SMD  | 1997 | 181 | 19 | 13 | 27.834 | F | 0.500 | -0.455 |
| CPR  | 1997 | 181 | 19 | 13 | 25.083 | F | 0.500 | -1.115 |
| WMD  | 1997 | 181 | 19 | 13 | 21.123 | F | 0.500 | -0.072 |
| CHP  | 1997 | 181 | 19 | 13 | 14.743 | F | 0.500 | 0.357  |
| DP00 | 1997 | 181 | 19 | 13 | 14.640 | F | 0.500 | 0.757  |
| JUN  | 1997 | 181 | 19 | 13 | 23.125 | F | 0.500 | -0.028 |

|      |     |    |    |         |          |           |         |   |       |
|------|-----|----|----|---------|----------|-----------|---------|---|-------|
| 1997 | 187 | 20 | 13 | 43.4673 | 16.15700 | -87.91700 | 33.0000 | 8 | 6.437 |
|------|-----|----|----|---------|----------|-----------|---------|---|-------|

|      |      |     |    |    |        |   |       |        |
|------|------|-----|----|----|--------|---|-------|--------|
| BGR  | 1997 | 187 | 20 | 25 | 51.379 | F | 0.500 | -0.912 |
| GSC  | 1997 | 187 | 20 | 25 | 18.515 | F | 0.500 | 0.289  |
| FLL  | 1997 | 187 | 20 | 25 | 58.179 | F | 0.500 | 1.170  |
| SFK  | 1997 | 187 | 20 | 25 | 47.706 | F | 0.500 | -0.566 |
| WMD  | 1997 | 187 | 20 | 25 | 44.104 | F | 0.500 | -0.748 |
| DGR  | 1997 | 187 | 20 | 25 | 7.058  | F | 0.500 | -1.514 |
| BVC  | 1997 | 187 | 20 | 25 | 42.183 | F | 0.500 | 1.770  |
| TPH  | 1997 | 187 | 20 | 25 | 45.401 | F | 0.500 | 0.750  |
| TWR2 | 1997 | 187 | 20 | 25 | 43.941 | F | 0.500 | 0.047  |
| JUN  | 1997 | 187 | 20 | 25 | 45.849 | F | 0.500 | 0.076  |
| SRF  | 1997 | 187 | 20 | 25 | 45.200 | F | 0.500 | 0.168  |
| CPR  | 1997 | 187 | 20 | 25 | 48.747 | F | 0.500 | -0.205 |
| OVY  | 1997 | 187 | 20 | 25 | 46.530 | F | 0.500 | 0.025  |
| SMD  | 1997 | 187 | 20 | 25 | 50.590 | F | 0.500 | -0.265 |
| TPNV | 1997 | 187 | 20 | 25 | 25.995 | F | 0.500 | 0.802  |
| BRR  | 1997 | 187 | 20 | 25 | 54.766 | F | 0.500 | 0.044  |
| WVOR | 1997 | 187 | 20 | 26 | 33.085 | F | 0.500 | -2.428 |
| BPC  | 1997 | 187 | 20 | 25 | 51.543 | F | 0.500 | 1.497  |

|      |     |    |    |         |          |            |         |   |       |
|------|-----|----|----|---------|----------|------------|---------|---|-------|
| 1997 | 189 | 12 | 11 | 18.5766 | 51.37200 | -178.58200 | 33.0000 | 9 | 3.577 |
|------|-----|----|----|---------|----------|------------|---------|---|-------|

|      |      |     |    |    |        |   |       |        |
|------|------|-----|----|----|--------|---|-------|--------|
| WHP  | 1997 | 189 | 12 | 26 | 2.179  | F | 0.500 | 0.194  |
| CWC  | 1997 | 189 | 12 | 26 | 4.721  | F | 0.500 | 0.308  |
| BGR  | 1997 | 189 | 12 | 25 | 52.921 | F | 0.500 | -1.145 |
| JUN  | 1997 | 189 | 12 | 26 | 0.137  | F | 0.500 | -0.192 |
| WVOR | 1997 | 189 | 12 | 25 | 5.861  | F | 0.500 | -0.667 |
| WMD  | 1997 | 189 | 12 | 26 | 1.636  | F | 0.500 | -0.719 |
| VTV  | 1997 | 189 | 12 | 26 | 27.610 | F | 0.500 | -0.681 |
| TPH  | 1997 | 189 | 12 | 25 | 56.931 | F | 0.500 | -0.515 |
| SLC  | 1997 | 189 | 12 | 26 | 6.811  | F | 0.500 | -0.160 |
| SRF  | 1997 | 189 | 12 | 26 | 0.389  | F | 0.500 | 0.655  |
| DGR  | 1997 | 189 | 12 | 26 | 38.477 | F | 0.500 | -1.163 |
| CHP  | 1997 | 189 | 12 | 26 | 9.305  | F | 0.500 | -0.212 |
| BPC  | 1997 | 189 | 12 | 25 | 56.749 | F | 0.500 | 1.672  |
| FLL  | 1997 | 189 | 12 | 25 | 50.006 | F | 0.500 | 1.241  |
| SFK  | 1997 | 189 | 12 | 25 | 57.721 | F | 0.500 | -0.468 |
| SMD  | 1997 | 189 | 12 | 25 | 54.679 | F | 0.500 | 0.122  |
| CMB  | 1997 | 189 | 12 | 25 | 29.649 | F | 0.500 | 1.053  |
| CPR  | 1997 | 189 | 12 | 25 | 56.967 | F | 0.500 | 0.329  |
| BRR  | 1997 | 189 | 12 | 25 | 51.703 | F | 0.500 | 0.374  |
| SFT  | 1997 | 189 | 12 | 26 | 6.159  | F | 0.500 | -0.421 |
| OVY  | 1997 | 189 | 12 | 25 | 59.632 | F | 0.500 | 0.396  |

|      |     |    |    |         |           |           |         |    |       |
|------|-----|----|----|---------|-----------|-----------|---------|----|-------|
| 1997 | 191 | 14 | 55 | 58.2992 | -22.73300 | -70.89400 | 33.0000 | 11 | 8.859 |
|------|-----|----|----|---------|-----------|-----------|---------|----|-------|

|      |      |     |    |    |        |   |       |        |
|------|------|-----|----|----|--------|---|-------|--------|
| WHP  | 1997 | 191 | 15 | 17 | 1.573  | F | 0.500 | -0.124 |
| DGR  | 1997 | 191 | 15 | 16 | 30.516 | F | 0.500 | 0.660  |
| BGR  | 1997 | 191 | 15 | 17 | 4.691  | F | 0.500 | -2.046 |
| CMB  | 1997 | 191 | 15 | 17 | 25.400 | F | 0.500 | -0.995 |
| PDC  | 1997 | 191 | 15 | 17 | 0.925  | F | 0.500 | -0.762 |
| SFT  | 1997 | 191 | 15 | 16 | 58.055 | F | 0.500 | 0.291  |
| BVC  | 1997 | 191 | 15 | 17 | 1.105  | F | 0.500 | 1.099  |
| SMD  | 1997 | 191 | 15 | 17 | 5.684  | F | 0.500 | -1.614 |
| BPC  | 1997 | 191 | 15 | 17 | 7.171  | F | 0.500 | -0.314 |
| SLC  | 1997 | 191 | 15 | 16 | 57.917 | F | 0.500 | -0.026 |
| CPR  | 1997 | 191 | 15 | 17 | 4.505  | F | 0.500 | -0.951 |
| JUN  | 1997 | 191 | 15 | 17 | 2.616  | F | 0.500 | -0.330 |
| TWR2 | 1997 | 191 | 15 | 17 | 1.004  | F | 0.500 | 0.030  |
| GSC  | 1997 | 191 | 15 | 16 | 42.500 | F | 0.500 | 0.427  |
| FLL  | 1997 | 191 | 15 | 17 | 10.260 | F | 0.500 | -1.663 |
| PFO  | 1997 | 191 | 15 | 16 | 27.144 | F | 0.500 | 1.275  |
| CWC  | 1997 | 191 | 15 | 17 | 0.891  | F | 0.500 | 1.367  |
| WMD  | 1997 | 191 | 15 | 17 | 0.628  | F | 0.500 | -0.453 |
| BRR  | 1997 | 191 | 15 | 17 | 7.462  | F | 0.500 | -1.769 |

|      |      |     |    |         |          |           |         |    |       |
|------|------|-----|----|---------|----------|-----------|---------|----|-------|
| 1997 | 195  | 16  | 9  | 37.8304 | 43.24900 | 146.38100 | 33.0000 | 12 | 2.310 |
| TWR2 | 1997 | 195 | 16 | 29      | 49.401 F | 0.500     | -0.546  |    |       |
| PDC  | 1997 | 195 | 16 | 29      | 46.446 F | 0.500     | -1.022  |    |       |
| JUN  | 1997 | 195 | 16 | 29      | 48.408 F | 0.500     | 0.082   |    |       |
| BRR  | 1997 | 195 | 16 | 29      | 40.949 F | 0.500     | 0.046   |    |       |
| VTV  | 1997 | 195 | 16 | 30      | 10.588 F | 0.500     | -0.115  |    |       |
| SMD  | 1997 | 195 | 16 | 29      | 44.039 F | 0.500     | 0.487   |    |       |
| GSC  | 1997 | 195 | 16 | 30      | 8.912 F  | 0.500     | -0.135  |    |       |
| PFO  | 1997 | 195 | 16 | 30      | 23.184 F | 0.500     | -1.189  |    |       |
| TPNV | 1997 | 195 | 16 | 30      | 1.399 F  | 0.500     | 0.324   |    |       |
| DP00 | 1997 | 195 | 16 | 29      | 55.789 F | 0.500     | -0.251  |    |       |
| BMN  | 1997 | 195 | 16 | 29      | 28.249 F | 0.500     | 0.185   |    |       |
| WMD  | 1997 | 195 | 16 | 29      | 49.252 F | 0.500     | -0.681  |    |       |
| BVC  | 1997 | 195 | 16 | 29      | 50.793 F | 0.500     | 0.049   |    |       |
| CWC  | 1997 | 195 | 16 | 29      | 51.788 F | 0.500     | 0.215   |    |       |
| BPC  | 1997 | 195 | 16 | 29      | 45.689 F | 0.500     | 1.769   |    |       |
| CMB  | 1997 | 195 | 16 | 29      | 23.495 F | 0.500     | 1.257   |    |       |
| CPR  | 1997 | 195 | 16 | 29      | 45.336 F | 0.500     | 0.082   |    |       |
| DGR  | 1997 | 195 | 16 | 30      | 19.307 F | 0.500     | -0.443  |    |       |
| WVOR | 1997 | 195 | 16 | 29      | 3.418 F  | 0.500     | 0.624   |    |       |
| SLC  | 1997 | 195 | 16 | 29      | 53.160 F | 0.500     | -0.440  |    |       |
| OVY  | 1997 | 195 | 16 | 29      | 47.953 F | 0.500     | 0.626   |    |       |
| ARC2 | 1997 | 195 | 16 | 29      | 52.232 F | 0.500     | -0.726  |    |       |
| FLL  | 1997 | 195 | 16 | 29      | 39.817 F | 0.500     | 0.992   |    |       |
| SFT  | 1997 | 195 | 16 | 29      | 53.129 F | 0.500     | -0.183  |    |       |
| BGR  | 1997 | 195 | 16 | 29      | 42.135 F | 0.500     | -1.007  |    |       |

|      |      |     |    |         |          |            |         |    |       |
|------|------|-----|----|---------|----------|------------|---------|----|-------|
| 1997 | 201  | 0   | 30 | 26.4928 | 52.56200 | -167.48399 | 14.4000 | 13 | 5.503 |
| OVY  | 1997 | 201 | 0  | 43      | 30.116 F | 0.500      | 0.566   |    |       |
| ARC2 | 1997 | 201 | 0  | 43      | 41.189 F | 0.500      | 4.060   |    |       |
| DP00 | 1997 | 201 | 0  | 43      | 41.748 F | 0.500      | 0.996   |    |       |
| DAC  | 1997 | 201 | 0  | 43      | 41.082 F | 0.500      | -0.128  |    |       |
| SLC  | 1997 | 201 | 0  | 43      | 37.934 F | 0.500      | 0.349   |    |       |
| CMB  | 1997 | 201 | 0  | 42      | 57.933 F | 0.500      | 0.251   |    |       |
| VTV  | 1997 | 201 | 0  | 44      | 0.290 F  | 0.500      | -0.221  |    |       |
| DGR  | 1997 | 201 | 0  | 44      | 11.866 F | 0.500      | -0.796  |    |       |
| TPNV | 1997 | 201 | 0  | 43      | 46.193 F | 0.500      | -0.683  |    |       |
| HVY  | 1997 | 201 | 0  | 43      | 19.680 F | 0.500      | -0.939  |    |       |
| BMN  | 1997 | 201 | 0  | 43      | 3.145 F  | 0.500      | -1.619  |    |       |
| SRF  | 1997 | 201 | 0  | 43      | 31.438 F | 0.500      | 1.478   |    |       |
| WMD  | 1997 | 201 | 0  | 43      | 31.980 F | 0.500      | -1.107  |    |       |
| PDC  | 1997 | 201 | 0  | 43      | 28.950 F | 0.500      | -1.493  |    |       |
| BRR  | 1997 | 201 | 0  | 43      | 21.480 F | 0.500      | 0.065   |    |       |
| SMD  | 1997 | 201 | 0  | 43      | 25.520 F | 0.500      | 0.856   |    |       |
| BPC  | 1997 | 201 | 0  | 43      | 27.251 F | 0.500      | 2.137   |    |       |
| FLL  | 1997 | 201 | 0  | 43      | 19.761 F | 0.500      | 1.171   |    |       |
| WHP  | 1997 | 201 | 0  | 43      | 32.474 F | 0.500      | 0.028   |    |       |
| SFT  | 1997 | 201 | 0  | 43      | 36.905 F | 0.500      | -0.438  |    |       |
| TPH  | 1997 | 201 | 0  | 43      | 26.489 F | 0.500      | -0.540  |    |       |
| CCC  | 1997 | 201 | 0  | 43      | 26.890 F | 0.500      | -0.133  |    |       |
| TWR2 | 1997 | 201 | 0  | 43      | 32.236 F | 0.500      | -0.751  |    |       |
| LMC  | 1997 | 201 | 0  | 43      | 24.907 F | 0.500      | -1.891  |    |       |
| BGR  | 1997 | 201 | 0  | 43      | 22.966 F | 0.500      | -1.416  |    |       |
| CPR  | 1997 | 201 | 0  | 43      | 27.199 F | 0.500      | 0.307   |    |       |
| JUN  | 1997 | 201 | 0  | 43      | 30.660 F | 0.500      | -0.108  |    |       |

|      |      |     |    |         |           |           |          |    |       |
|------|------|-----|----|---------|-----------|-----------|----------|----|-------|
| 1997 | 201  | 10  | 14 | 28.5815 | -22.98200 | -66.30100 | 256.1000 | 14 | 5.782 |
| PDC  | 1997 | 201 | 10 | 35      | 19.955 F  | 0.500     | 0.046    |    |       |
| OVY  | 1997 | 201 | 10 | 35      | 22.424 F  | 0.500     | 0.665    |    |       |
| BGR  | 1997 | 201 | 10 | 35      | 23.565 F  | 0.500     | -0.938   |    |       |
| CPR  | 1997 | 201 | 10 | 35      | 23.085 F  | 0.500     | 0.008    |    |       |
| JUN  | 1997 | 201 | 10 | 35      | 21.089 F  | 0.500     | 0.371    |    |       |
| SMD  | 1997 | 201 | 10 | 35      | 24.172 F  | 0.500     | -0.604   |    |       |

|     |      |     |    |    |        |   |       |        |
|-----|------|-----|----|----|--------|---|-------|--------|
| BPC | 1997 | 201 | 10 | 35 | 24.974 | F | 0.500 | 0.130  |
| WHP | 1997 | 201 | 10 | 35 | 20.737 | F | 0.500 | 1.294  |
| BRR | 1997 | 201 | 10 | 35 | 25.419 | F | 0.500 | -1.361 |
| BVC | 1997 | 201 | 10 | 35 | 19.378 | F | 0.500 | 1.750  |
| FLL | 1997 | 201 | 10 | 35 | 27.830 | F | 0.500 | -1.362 |

|      |     |   |    |         |          |            |         |    |       |
|------|-----|---|----|---------|----------|------------|---------|----|-------|
| 1997 | 227 | 7 | 37 | 57.9418 | -4.37300 | -105.69800 | 10.0000 | 17 | 8.862 |
|------|-----|---|----|---------|----------|------------|---------|----|-------|

|      |      |     |   |    |        |   |       |        |
|------|------|-----|---|----|--------|---|-------|--------|
| JUN  | 1997 | 227 | 7 | 52 | 15.968 | F | 0.500 | 0.338  |
| MNV  | 1997 | 227 | 7 | 52 | 40.772 | F | 0.500 | 0.636  |
| HVY  | 1997 | 227 | 7 | 52 | 18.197 | F | 0.500 | -2.279 |
| ARC2 | 1997 | 227 | 7 | 52 | 7.265  | F | 0.500 | -0.197 |
| MWC  | 1997 | 227 | 7 | 51 | 41.412 | F | 0.500 | 0.319  |
| PHL  | 1997 | 227 | 7 | 52 | 8.261  | F | 0.500 | 0.044  |
| FLL  | 1997 | 227 | 7 | 52 | 25.762 | F | 0.500 | -1.637 |
| TIN  | 1997 | 227 | 7 | 52 | 21.621 | F | 0.500 | 0.468  |
| BRR  | 1997 | 227 | 7 | 52 | 21.008 | F | 0.500 | -1.379 |
| BMN  | 1997 | 227 | 7 | 53 | 3.615  | F | 0.500 | -0.846 |
| WMD  | 1997 | 227 | 7 | 52 | 11.123 | F | 0.500 | 0.175  |
| DAC  | 1997 | 227 | 7 | 52 | 8.215  | F | 0.500 | 0.097  |
| DP00 | 1997 | 227 | 7 | 52 | 9.647  | F | 0.500 | 1.311  |
| GSC  | 1997 | 227 | 7 | 51 | 52.001 | F | 0.500 | 0.527  |
| OVY  | 1997 | 227 | 7 | 52 | 18.190 | F | 0.500 | 0.039  |
| BPC  | 1997 | 227 | 7 | 52 | 23.547 | F | 0.500 | 0.125  |
| TPH  | 1997 | 227 | 7 | 52 | 32.412 | F | 0.500 | 0.556  |
| SLC  | 1997 | 227 | 7 | 52 | 13.038 | F | 0.500 | 1.045  |
| TPNV | 1997 | 227 | 7 | 52 | 13.760 | F | 0.500 | 0.994  |
| PDC  | 1997 | 227 | 7 | 52 | 9.495  | F | 0.500 | -0.218 |
| LMC  | 1997 | 227 | 7 | 52 | 13.450 | F | 0.500 | -0.972 |
| BGR  | 1997 | 227 | 7 | 52 | 16.938 | F | 0.500 | -1.267 |
| CPR  | 1997 | 227 | 7 | 52 | 18.697 | F | 0.500 | -0.309 |
| WHP  | 1997 | 227 | 7 | 52 | 15.653 | F | 0.500 | 0.688  |
| TWR2 | 1997 | 227 | 7 | 52 | 12.953 | F | 0.500 | 0.667  |
| SMD  | 1997 | 227 | 7 | 52 | 20.772 | F | 0.500 | -1.043 |
| SRF  | 1997 | 227 | 7 | 52 | 19.565 | F | 0.500 | 0.055  |
| CMB  | 1997 | 227 | 7 | 52 | 42.439 | F | 0.500 | -0.825 |
| SFT  | 1997 | 227 | 7 | 52 | 10.151 | F | 0.500 | 0.891  |
| CWC  | 1997 | 227 | 7 | 52 | 14.147 | F | 0.500 | 1.998  |

|      |     |    |    |         |         |           |          |    |       |
|------|-----|----|----|---------|---------|-----------|----------|----|-------|
| 1997 | 245 | 12 | 13 | 28.9894 | 3.84900 | -75.74900 | 198.7000 | 19 | 6.069 |
|------|-----|----|----|---------|---------|-----------|----------|----|-------|

|      |      |     |    |    |        |   |       |        |
|------|------|-----|----|----|--------|---|-------|--------|
| FLL  | 1997 | 245 | 12 | 29 | 21.800 | F | 0.500 | -0.563 |
| OSI  | 1997 | 245 | 12 | 29 | 2.206  | F | 0.500 | 0.077  |
| SFK  | 1997 | 245 | 12 | 29 | 13.678 | F | 0.500 | -0.770 |
| VTV  | 1997 | 245 | 12 | 28 | 47.917 | F | 0.500 | 0.105  |
| SRF  | 1997 | 245 | 12 | 29 | 11.654 | F | 0.500 | -0.074 |
| TPNV | 1997 | 245 | 12 | 28 | 54.486 | F | 0.500 | 0.509  |
| WVOR | 1997 | 245 | 12 | 29 | 51.898 | F | 0.500 | -3.263 |
| BGR  | 1997 | 245 | 12 | 29 | 16.669 | F | 0.500 | -1.375 |
| SVD  | 1997 | 245 | 12 | 28 | 43.520 | F | 0.500 | 1.261  |
| PAS  | 1997 | 245 | 12 | 28 | 54.112 | F | 0.500 | 0.723  |
| TIN  | 1997 | 245 | 12 | 29 | 14.394 | F | 0.500 | 0.976  |
| LMC  | 1997 | 245 | 12 | 29 | 15.049 | F | 0.500 | -1.175 |
| CMB  | 1997 | 245 | 12 | 29 | 39.567 | F | 0.500 | -0.740 |
| PHL  | 1997 | 245 | 12 | 29 | 25.432 | F | 0.500 | 0.139  |
| SNCC | 1997 | 245 | 12 | 29 | 2.415  | F | 0.500 | 0.815  |
| MNV  | 1997 | 245 | 12 | 29 | 23.017 | F | 0.500 | 0.681  |
| BRR  | 1997 | 245 | 12 | 29 | 19.429 | F | 0.500 | -0.826 |
| HVY  | 1997 | 245 | 12 | 29 | 19.308 | F | 0.500 | -1.989 |
| TWR2 | 1997 | 245 | 12 | 29 | 10.847 | F | 0.500 | 0.219  |
| SFT  | 1997 | 245 | 12 | 29 | 6.858  | F | 0.500 | 0.428  |
| SLC  | 1997 | 245 | 12 | 29 | 5.008  | F | 0.500 | -0.172 |
| DP00 | 1997 | 245 | 12 | 29 | 3.592  | F | 0.500 | 0.983  |
| CPR  | 1997 | 245 | 12 | 29 | 14.627 | F | 0.500 | -0.529 |
| JUN  | 1997 | 245 | 12 | 29 | 12.141 | F | 0.500 | -0.203 |

|     |      |     |    |    |        |   |       |        |
|-----|------|-----|----|----|--------|---|-------|--------|
| WHP | 1997 | 245 | 12 | 29 | 10.527 | F | 0.500 | 0.035  |
| SMD | 1997 | 245 | 12 | 29 | 16.074 | F | 0.500 | -0.809 |
| PDC | 1997 | 245 | 12 | 29 | 13.413 | F | 0.500 | -0.285 |
| MWC | 1997 | 245 | 12 | 28 | 53.409 | F | 0.500 | 0.380  |
| PLM | 1997 | 245 | 12 | 28 | 36.854 | F | 0.500 | 1.699  |
| RPV | 1997 | 245 | 12 | 28 | 54.169 | F | 0.500 | 0.998  |
| BPC | 1997 | 245 | 12 | 29 | 16.950 | F | 0.500 | 0.731  |
| GSC | 1997 | 245 | 12 | 28 | 48.612 | F | 0.500 | 0.946  |
| CIU | 1997 | 245 | 12 | 28 | 53.231 | F | 0.500 | 1.069  |

|      |     |    |   |        |          |           |         |    |       |
|------|-----|----|---|--------|----------|-----------|---------|----|-------|
| 1997 | 175 | 23 | 5 | 2.2044 | -1.92400 | 127.89900 | 33.0000 | 21 | 9.064 |
|------|-----|----|---|--------|----------|-----------|---------|----|-------|

|      |      |     |    |    |        |   |       |        |
|------|------|-----|----|----|--------|---|-------|--------|
| BGR  | 1997 | 175 | 23 | 30 | 1.552  | F | 0.500 | -1.656 |
| WVOR | 1997 | 175 | 23 | 29 | 57.478 | F | 0.500 | -1.013 |
| TPNV | 1997 | 175 | 23 | 30 | 13.500 | F | 0.500 | 1.670  |
| WMD  | 1997 | 175 | 23 | 30 | 4.119  | F | 0.500 | -1.459 |
| CMB  | 1997 | 175 | 23 | 29 | 57.190 | F | 0.500 | 0.052  |
| GSC  | 1997 | 175 | 23 | 30 | 14.201 | F | 0.500 | 2.688  |
| DP00 | 1997 | 175 | 23 | 30 | 9.082  | F | 0.500 | 1.043  |
| BPC  | 1997 | 175 | 23 | 30 | 5.817  | F | 0.500 | 1.009  |
| SRF  | 1997 | 175 | 23 | 30 | 5.791  | F | 0.500 | -0.216 |
| CPR  | 1997 | 175 | 23 | 30 | 3.211  | F | 0.500 | -1.487 |
| BVC  | 1997 | 175 | 23 | 30 | 7.285  | F | 0.500 | 0.668  |
| OVY  | 1997 | 175 | 23 | 30 | 5.544  | F | 0.500 | -0.079 |
| SMD  | 1997 | 175 | 23 | 30 | 4.023  | F | 0.500 | -0.258 |
| SFT  | 1997 | 175 | 23 | 30 | 6.847  | F | 0.500 | -0.045 |
| FLL  | 1997 | 175 | 23 | 30 | 3.528  | F | 0.500 | 0.590  |
| WHP  | 1997 | 175 | 23 | 30 | 5.849  | F | 0.500 | -0.367 |
| CHP  | 1997 | 175 | 23 | 30 | 7.915  | F | 0.500 | 0.582  |
| SFK  | 1997 | 175 | 23 | 30 | 2.635  | F | 0.500 | -1.223 |
| JUN  | 1997 | 175 | 23 | 30 | 5.195  | F | 0.500 | -0.499 |

|      |     |   |    |         |          |           |         |    |       |
|------|-----|---|----|---------|----------|-----------|---------|----|-------|
| 1997 | 241 | 8 | 14 | 17.9707 | -3.56200 | 144.36200 | 22.8000 | 22 | 8.001 |
|------|-----|---|----|---------|----------|-----------|---------|----|-------|

|      |      |     |   |    |        |   |       |        |
|------|------|-----|---|----|--------|---|-------|--------|
| JUN  | 1997 | 241 | 8 | 38 | 28.736 | F | 0.500 | -0.335 |
| ARC2 | 1997 | 241 | 8 | 38 | 32.382 | F | 0.500 | 3.022  |
| TIN  | 1997 | 241 | 8 | 38 | 29.209 | F | 0.500 | -0.139 |
| CWC  | 1997 | 241 | 8 | 38 | 30.457 | F | 0.500 | 0.237  |
| SFT  | 1997 | 241 | 8 | 38 | 30.459 | F | 0.500 | 0.113  |
| BPC  | 1997 | 241 | 8 | 38 | 29.434 | F | 0.500 | 0.835  |
| CMB  | 1997 | 241 | 8 | 38 | 19.336 | F | 0.500 | -0.619 |
| SRF  | 1997 | 241 | 8 | 38 | 30.130 | F | 0.500 | 0.223  |
| PLM  | 1997 | 241 | 8 | 38 | 36.947 | F | 0.500 | 1.231  |
| HVY  | 1997 | 241 | 8 | 38 | 22.705 | F | 0.500 | -1.851 |
| BGR  | 1997 | 241 | 8 | 38 | 24.341 | F | 0.500 | -1.741 |
| SLC  | 1997 | 241 | 8 | 38 | 31.971 | F | 0.500 | 0.284  |
| MLAC | 1997 | 241 | 8 | 38 | 28.780 | F | 0.500 | 1.821  |
| LMC  | 1997 | 241 | 8 | 38 | 23.615 | F | 0.500 | -2.251 |
| TWR2 | 1997 | 241 | 8 | 38 | 28.283 | F | 0.500 | -0.699 |
| WHP  | 1997 | 241 | 8 | 38 | 29.659 | F | 0.500 | -0.125 |
| DP00 | 1997 | 241 | 8 | 38 | 33.073 | F | 0.500 | 1.227  |
| SMD  | 1997 | 241 | 8 | 38 | 27.640 | F | 0.500 | -0.104 |
| FLL  | 1997 | 241 | 8 | 38 | 26.656 | F | 0.500 | 0.244  |
| BRR  | 1997 | 241 | 8 | 38 | 25.269 | F | 0.500 | -0.805 |
| CPR  | 1997 | 241 | 8 | 38 | 27.534 | F | 0.500 | -0.568 |

|      |     |    |    |        |         |           |          |    |       |
|------|-----|----|----|--------|---------|-----------|----------|----|-------|
| 1997 | 279 | 12 | 30 | 7.6451 | 9.79000 | 125.77900 | 105.6000 | 23 | 1.825 |
|------|-----|----|----|--------|---------|-----------|----------|----|-------|

|      |      |     |    |    |        |   |       |        |
|------|------|-----|----|----|--------|---|-------|--------|
| RPV  | 1997 | 279 | 12 | 54 | 35.537 | F | 0.500 | 1.505  |
| SLC  | 1997 | 279 | 12 | 54 | 33.059 | F | 0.500 | 0.501  |
| MKW3 | 1997 | 279 | 12 | 54 | 28.719 | F | 0.500 | -1.019 |
| TIN  | 1997 | 279 | 12 | 54 | 29.667 | F | 0.500 | -0.151 |
| ARC2 | 1997 | 279 | 12 | 54 | 31.517 | F | 0.500 | 0.018  |
| FLL  | 1997 | 279 | 12 | 54 | 27.671 | F | 0.500 | 0.752  |
| HVY  | 1997 | 279 | 12 | 54 | 25.036 | F | 0.500 | -1.274 |
| WHP  | 1997 | 279 | 12 | 54 | 31.361 | F | 0.500 | 0.380  |

|      |      |     |    |    |        |   |       |        |
|------|------|-----|----|----|--------|---|-------|--------|
| BPC  | 1997 | 279 | 12 | 54 | 29.771 | F | 0.500 | 0.734  |
| DP00 | 1997 | 279 | 12 | 54 | 34.303 | F | 0.500 | 1.104  |
| TWR2 | 1997 | 279 | 12 | 54 | 30.429 | F | 0.500 | -0.324 |
| SFK  | 1997 | 279 | 12 | 54 | 27.938 | F | 0.500 | -0.774 |
| PDC  | 1997 | 279 | 12 | 54 | 26.740 | F | 0.500 | -1.864 |
| CHP  | 1997 | 279 | 12 | 54 | 33.338 | F | 0.500 | 0.562  |
| JUN  | 1997 | 279 | 12 | 54 | 29.702 | F | 0.500 | -0.758 |
| SRF  | 1997 | 279 | 12 | 54 | 30.501 | F | 0.500 | 0.012  |
| CPR  | 1997 | 279 | 12 | 54 | 28.539 | F | 0.500 | -0.683 |
| DGR  | 1997 | 279 | 12 | 54 | 41.621 | F | 0.500 | 2.810  |
| BRR  | 1997 | 279 | 12 | 54 | 26.172 | F | 0.500 | -1.144 |
| PHL  | 1997 | 279 | 12 | 54 | 23.983 | F | 0.500 | -0.386 |

|      |      |     |    |         |           |           |          |        |       |
|------|------|-----|----|---------|-----------|-----------|----------|--------|-------|
| 2005 | 164  | 22  | 44 | 40.1085 | -19.98700 | -69.19700 | 115.6000 | 1      | 6.208 |
| SMM  | 2005 | 164 | 23 | 5       | 16.878    | F         | 0.500    | 0.208  |       |
| TPH  | 2005 | 164 | 23 | 5       | 18.026    | F         | 0.500    | -0.642 |       |
| BAK  | 2005 | 164 | 23 | 5       | 11.132    | F         | 0.500    | 0.502  |       |
| RSS  | 2005 | 164 | 23 | 4       | 47.479    | F         | 0.500    | -0.256 |       |
| MNRC | 2005 | 164 | 23 | 5       | 59.704    | F         | 0.500    | 1.385  |       |
| MLAC | 2005 | 164 | 23 | 5       | 26.827    | F         | 0.500    | 0.786  |       |
| THX  | 2005 | 164 | 23 | 4       | 36.794    | F         | 0.500    | 0.144  |       |
| USC  | 2005 | 164 | 23 | 4       | 55.772    | F         | 0.500    | 0.895  |       |
| U05C | 2005 | 164 | 23 | 5       | 24.003    | F         | 0.500    | -0.815 |       |
| V05C | 2005 | 164 | 23 | 5       | 20.130    | F         | 0.500    | 0.026  |       |
| CVS  | 2005 | 164 | 23 | 5       | 54.538    | F         | 0.500    | -0.289 |       |
| KCC  | 2005 | 164 | 23 | 5       | 26.246    | F         | 0.500    | -0.647 |       |
| SDP  | 2005 | 164 | 23 | 5       | 14.190    | F         | 0.500    | -0.595 |       |
| HATC | 2005 | 164 | 23 | 6       | 4.740     | F         | 0.500    | -0.890 |       |
| JRSC | 2005 | 164 | 23 | 5       | 46.970    | F         | 0.500    | 0.245  |       |
| O03C | 2005 | 164 | 23 | 6       | 2.324     | F         | 0.500    | -0.991 |       |
| SUTB | 2005 | 164 | 23 | 5       | 55.728    | F         | 0.500    | -0.752 |       |
| BCC  | 2005 | 164 | 23 | 4       | 45.013    | F         | 0.500    | 1.069  |       |
| MSJ  | 2005 | 164 | 23 | 4       | 45.035    | F         | 0.500    | 1.260  |       |
| ORV  | 2005 | 164 | 23 | 5       | 57.220    | F         | 0.500    | 0.516  |       |
| LAVA | 2005 | 164 | 23 | 5       | 46.479    | F         | 0.500    | -0.029 |       |
| SDD  | 2005 | 164 | 23 | 4       | 47.316    | F         | 0.500    | 0.539  |       |
| MPP  | 2005 | 164 | 23 | 5       | 12.473    | F         | 0.500    | 0.006  |       |
| SBC  | 2005 | 164 | 23 | 5       | 7.473     | F         | 0.500    | -0.619 |       |
| S05C | 2005 | 164 | 23 | 5       | 32.603    | F         | 0.500    | -0.910 |       |
| SLA  | 2005 | 164 | 23 | 5       | 3.003     | F         | 0.500    | 0.784  |       |
| ELFS | 2005 | 164 | 23 | 5       | 59.714    | F         | 0.500    | -0.149 |       |
| SCZ2 | 2005 | 164 | 23 | 5       | 3.660     | F         | 0.500    | -0.662 |       |
| VES  | 2005 | 164 | 23 | 5       | 13.650    | F         | 0.500    | -0.450 |       |
| PLS  | 2005 | 164 | 23 | 4       | 47.864    | F         | 0.500    | -0.533 |       |
| LGU  | 2005 | 164 | 23 | 5       | 1.067     | F         | 0.500    | 0.011  |       |
| CWC  | 2005 | 164 | 23 | 5       | 13.367    | F         | 0.500    | 1.369  |       |
| SN26 | 2005 | 164 | 23 | 5       | 23.793    | F         | 0.500    | 0.468  |       |
| SN51 | 2005 | 164 | 23 | 5       | 29.712    | F         | 0.500    | -1.473 |       |
| T05C | 2005 | 164 | 23 | 5       | 32.617    | F         | 0.500    | 0.014  |       |
| PHL  | 2005 | 164 | 23 | 5       | 20.955    | F         | 0.500    | -0.334 |       |
| SN37 | 2005 | 164 | 23 | 5       | 26.516    | F         | 0.500    | 1.083  |       |
| PIN  | 2005 | 164 | 23 | 6       | 22.581    | F         | 0.500    | -0.491 |       |
| RCT  | 2005 | 164 | 23 | 5       | 17.545    | F         | 0.500    | -1.110 |       |
| PACP | 2005 | 164 | 23 | 5       | 37.722    | F         | 0.500    | -0.049 |       |
| MGE  | 2005 | 164 | 23 | 4       | 41.156    | F         | 0.500    | 1.679  |       |
| Q04C | 2005 | 164 | 23 | 5       | 50.804    | F         | 0.500    | -0.304 |       |
| SNCC | 2005 | 164 | 23 | 4       | 58.117    | F         | 0.500    | 0.196  |       |
| HOPS | 2005 | 164 | 23 | 6       | 5.182     | F         | 0.500    | 2.057  |       |
| P05C | 2005 | 164 | 23 | 5       | 50.042    | F         | 0.500    | 0.391  |       |
| JCS  | 2005 | 164 | 23 | 4       | 35.936    | F         | 0.500    | 0.384  |       |
| SN42 | 2005 | 164 | 23 | 5       | 26.506    | F         | 0.500    | -1.584 |       |
| CAP  | 2005 | 164 | 23 | 4       | 42.731    | F         | 0.500    | 0.483  |       |
| PLM  | 2005 | 164 | 23 | 4       | 40.368    | F         | 0.500    | 0.553  |       |



|      |      |     |    |   |        |   |       |        |
|------|------|-----|----|---|--------|---|-------|--------|
| BBS  | 2005 | 164 | 23 | 4 | 46.063 | F | 0.500 | 1.167  |
| O05C | 2005 | 164 | 23 | 5 | 56.497 | F | 0.500 | 0.354  |
| GRA  | 2005 | 164 | 23 | 5 | 12.000 | F | 0.500 | 0.738  |
| BOR  | 2005 | 164 | 23 | 4 | 36.541 | F | 0.500 | 0.981  |
| SN47 | 2005 | 164 | 23 | 5 | 29.088 | F | 0.500 | 1.216  |
| SN38 | 2005 | 164 | 23 | 5 | 27.221 | F | 0.500 | 1.306  |
| BDM  | 2005 | 164 | 23 | 5 | 48.755 | F | 0.500 | 0.551  |
| PKD  | 2005 | 164 | 23 | 5 | 25.614 | F | 0.500 | 0.519  |
| RPV  | 2005 | 164 | 23 | 4 | 54.268 | F | 0.500 | 0.736  |
| ARV  | 2005 | 164 | 23 | 5 | 6.840  | F | 0.500 | -0.018 |
| SN48 | 2005 | 164 | 23 | 5 | 29.443 | F | 0.500 | 1.296  |
| TIN  | 2005 | 164 | 23 | 5 | 18.084 | F | 0.500 | 0.651  |
| TOV  | 2005 | 164 | 23 | 4 | 59.822 | F | 0.500 | 0.167  |
| OSI  | 2005 | 164 | 23 | 5 | 2.486  | F | 0.500 | -0.038 |
| FMP  | 2005 | 164 | 23 | 4 | 53.540 | F | 0.500 | 0.895  |
| HELL | 2005 | 164 | 23 | 5 | 19.186 | F | 0.500 | -0.821 |
| O04C | 2005 | 164 | 23 | 5 | 59.881 | F | 0.500 | 0.045  |
| SN28 | 2005 | 164 | 23 | 5 | 24.578 | F | 0.500 | 0.954  |
| SPG  | 2005 | 164 | 23 | 5 | 14.628 | F | 0.500 | 0.274  |
| SN57 | 2005 | 164 | 23 | 5 | 32.055 | F | 0.500 | 1.218  |
| SN67 | 2005 | 164 | 23 | 5 | 34.267 | F | 0.500 | 1.151  |
| ISA  | 2005 | 164 | 23 | 5 | 9.109  | F | 0.500 | 0.330  |
| HEC  | 2005 | 164 | 23 | 4 | 48.379 | F | 0.500 | 0.925  |
| SN62 | 2005 | 164 | 23 | 5 | 32.596 | F | 0.500 | -0.637 |
| CLC  | 2005 | 164 | 23 | 5 | 4.364  | F | 0.500 | 0.726  |
| EDW2 | 2005 | 164 | 23 | 4 | 58.633 | F | 0.500 | -0.826 |
| S04C | 2005 | 164 | 23 | 5 | 41.866 | F | 0.500 | 0.570  |
| FARB | 2005 | 164 | 23 | 5 | 53.461 | F | 0.500 | -0.612 |
| SBPX | 2005 | 164 | 23 | 4 | 50.242 | F | 0.500 | 1.069  |
| SN71 | 2005 | 164 | 23 | 5 | 35.736 | F | 0.500 | -0.463 |
| DGR  | 2005 | 164 | 23 | 4 | 43.992 | F | 0.500 | 0.992  |
| HAST | 2005 | 164 | 23 | 5 | 35.892 | F | 0.500 | 0.665  |
| SVD  | 2005 | 164 | 23 | 4 | 48.344 | F | 0.500 | 1.356  |
| PAS  | 2005 | 164 | 23 | 4 | 55.786 | F | 0.500 | 0.831  |
| CIA  | 2005 | 164 | 23 | 4 | 51.801 | F | 0.500 | 0.738  |
| SHO  | 2005 | 164 | 23 | 4 | 56.236 | F | 0.500 | 1.064  |
| R04C | 2005 | 164 | 23 | 5 | 44.261 | F | 0.500 | 0.254  |
| ADO  | 2005 | 164 | 23 | 4 | 53.064 | F | 0.500 | 0.171  |
| GOR  | 2005 | 164 | 23 | 4 | 40.800 | F | 0.500 | 0.266  |
| MWC  | 2005 | 164 | 23 | 4 | 55.458 | F | 0.500 | 0.470  |
| FUR  | 2005 | 164 | 23 | 5 | 2.646  | F | 0.500 | -0.903 |
| CMB  | 2005 | 164 | 23 | 5 | 39.204 | F | 0.500 | 0.065  |
| BFS  | 2005 | 164 | 23 | 4 | 52.789 | F | 0.500 | 0.467  |
| DJJ  | 2005 | 164 | 23 | 4 | 57.137 | F | 0.500 | 0.306  |
| SAO  | 2005 | 164 | 23 | 5 | 38.224 | F | 0.500 | 1.115  |
| DEC  | 2005 | 164 | 23 | 4 | 57.243 | F | 0.500 | 0.288  |
| VCS  | 2005 | 164 | 23 | 4 | 57.267 | F | 0.500 | -0.123 |
| CHF  | 2005 | 164 | 23 | 4 | 55.918 | F | 0.500 | 0.392  |
| GSC  | 2005 | 164 | 23 | 4 | 55.698 | F | 0.500 | 1.216  |
| BBR  | 2005 | 164 | 23 | 4 | 48.608 | F | 0.500 | 1.330  |
| RRX  | 2005 | 164 | 23 | 4 | 52.685 | F | 0.500 | 0.263  |
| VTV  | 2005 | 164 | 23 | 4 | 52.361 | F | 0.500 | -0.001 |

|      |     |    |    |         |          |           |         |
|------|-----|----|----|---------|----------|-----------|---------|
| 2005 | 165 | 17 | 10 | 11.6575 | 51.23900 | 179.31400 | 17.0000 |
|------|-----|----|----|---------|----------|-----------|---------|

|   |        |
|---|--------|
| 3 | -0.622 |
|---|--------|

|      |      |     |    |    |        |   |       |        |
|------|------|-----|----|----|--------|---|-------|--------|
| VTV  | 2005 | 165 | 17 | 25 | 43.745 | F | 0.500 | -0.346 |
| MSJ  | 2005 | 165 | 17 | 25 | 53.544 | F | 0.500 | -0.687 |
| SUTB | 2005 | 165 | 17 | 24 | 22.456 | F | 0.500 | 1.116  |
| O03C | 2005 | 165 | 17 | 24 | 12.714 | F | 0.500 | 0.345  |
| ELFS | 2005 | 165 | 17 | 24 | 19.633 | F | 0.500 | 0.414  |
| MGE  | 2005 | 165 | 17 | 25 | 57.520 | F | 0.500 | -1.777 |
| TIN  | 2005 | 165 | 17 | 25 | 14.549 | F | 0.500 | 1.087  |
| ADO  | 2005 | 165 | 17 | 25 | 42.616 | F | 0.500 | -0.794 |
| USC  | 2005 | 165 | 17 | 25 | 40.223 | F | 0.500 | -0.244 |

|      |      |     |    |    |        |   |       |        |
|------|------|-----|----|----|--------|---|-------|--------|
| SDP  | 2005 | 165 | 17 | 25 | 16.669 | F | 0.500 | 0.969  |
| SNCC | 2005 | 165 | 17 | 25 | 36.656 | F | 0.500 | -0.143 |
| FUR  | 2005 | 165 | 17 | 25 | 28.917 | F | 0.500 | -1.596 |
| SDD  | 2005 | 165 | 17 | 25 | 49.807 | F | 0.500 | -0.530 |
| RSS  | 2005 | 165 | 17 | 25 | 47.885 | F | 0.500 | -1.519 |
| FARB | 2005 | 165 | 17 | 24 | 23.468 | F | 0.500 | -0.208 |
| GRA  | 2005 | 165 | 17 | 25 | 21.994 | F | 0.500 | 0.547  |
| O04C | 2005 | 165 | 17 | 24 | 18.865 | F | 0.500 | 0.256  |
| PLS  | 2005 | 165 | 17 | 25 | 46.551 | F | 0.500 | -2.396 |
| BAK  | 2005 | 165 | 17 | 25 | 20.269 | F | 0.500 | -0.544 |
| R04C | 2005 | 165 | 17 | 24 | 38.451 | F | 0.500 | 0.760  |
| PAS  | 2005 | 165 | 17 | 25 | 39.968 | F | 0.500 | -0.422 |
| BBS  | 2005 | 165 | 17 | 25 | 51.925 | F | 0.500 | -1.216 |
| ARV  | 2005 | 165 | 17 | 25 | 24.739 | F | 0.500 | -0.621 |
| SHO  | 2005 | 165 | 17 | 25 | 40.364 | F | 0.500 | -0.820 |
| TOV  | 2005 | 165 | 17 | 25 | 34.068 | F | 0.500 | -0.409 |
| MLAC | 2005 | 165 | 17 | 25 | 5.077  | F | 0.500 | 2.050  |
| SN47 | 2005 | 165 | 17 | 25 | 1.948  | F | 0.500 | 1.145  |
| SCZ2 | 2005 | 165 | 17 | 25 | 28.468 | F | 0.500 | -0.196 |
| SN57 | 2005 | 165 | 17 | 24 | 58.147 | F | 0.500 | 1.082  |
| SLA  | 2005 | 165 | 17 | 25 | 31.443 | F | 0.500 | -0.977 |
| T05C | 2005 | 165 | 17 | 24 | 54.352 | F | 0.500 | 1.902  |
| V03C | 2005 | 165 | 17 | 24 | 55.173 | F | 0.500 | -0.120 |
| DJJ  | 2005 | 165 | 17 | 25 | 37.659 | F | 0.500 | -0.501 |
| WENL | 2005 | 165 | 17 | 24 | 36.643 | F | 0.500 | 0.632  |
| SN37 | 2005 | 165 | 17 | 25 | 5.113  | F | 0.500 | 1.200  |
| OSI  | 2005 | 165 | 17 | 25 | 31.203 | F | 0.500 | -0.003 |
| HOPS | 2005 | 165 | 17 | 24 | 14.132 | F | 0.500 | 2.497  |
| LGU  | 2005 | 165 | 17 | 25 | 32.647 | F | 0.500 | -0.139 |
| V05C | 2005 | 165 | 17 | 25 | 10.065 | F | 0.500 | 1.314  |
| CWC  | 2005 | 165 | 17 | 25 | 20.774 | F | 0.500 | 0.356  |
| MNRC | 2005 | 165 | 17 | 24 | 22.055 | F | 0.500 | 3.485  |
| HAST | 2005 | 165 | 17 | 24 | 49.212 | F | 0.500 | 0.038  |
| S04C | 2005 | 165 | 17 | 24 | 42.055 | F | 0.500 | 1.052  |
| JRSC | 2005 | 165 | 17 | 24 | 33.293 | F | 0.500 | -0.257 |
| SN67 | 2005 | 165 | 17 | 24 | 55.218 | F | 0.500 | 0.768  |
| CVS  | 2005 | 165 | 17 | 24 | 24.223 | F | 0.500 | 1.213  |
| ISA  | 2005 | 165 | 17 | 25 | 21.774 | F | 0.500 | -1.886 |
| SN26 | 2005 | 165 | 17 | 25 | 8.587  | F | 0.500 | 2.177  |
| SN48 | 2005 | 165 | 17 | 25 | 1.171  | F | 0.500 | 0.568  |
| GSC  | 2005 | 165 | 17 | 25 | 40.985 | F | 0.500 | -0.967 |
| Q04C | 2005 | 165 | 17 | 24 | 29.538 | F | 0.500 | 1.084  |
| RPV  | 2005 | 165 | 17 | 25 | 41.289 | F | 0.500 | -0.794 |
| SVD  | 2005 | 165 | 17 | 25 | 49.463 | F | 0.500 | -0.976 |
| PKD  | 2005 | 165 | 17 | 25 | 2.919  | F | 0.500 | 0.470  |
| SN28 | 2005 | 165 | 17 | 25 | 7.415  | F | 0.500 | 0.937  |
| SN38 | 2005 | 165 | 17 | 25 | 4.073  | F | 0.500 | 0.532  |
| CLC  | 2005 | 165 | 17 | 25 | 29.988 | F | 0.500 | -0.264 |
| RCT  | 2005 | 165 | 17 | 25 | 9.820  | F | 0.500 | -0.822 |
| LAVA | 2005 | 165 | 17 | 24 | 35.453 | F | 0.500 | 0.146  |
| BDM  | 2005 | 165 | 17 | 24 | 33.481 | F | 0.500 | 1.524  |
| PHL  | 2005 | 165 | 17 | 25 | 7.410  | F | 0.500 | 0.205  |
| O05C | 2005 | 165 | 17 | 24 | 22.662 | F | 0.500 | -0.384 |
| FMP  | 2005 | 165 | 17 | 25 | 42.408 | F | 0.500 | -0.747 |
| PACP | 2005 | 165 | 17 | 24 | 46.645 | F | 0.500 | 0.625  |
| MPP  | 2005 | 165 | 17 | 25 | 20.037 | F | 0.500 | 0.946  |
| DEC  | 2005 | 165 | 17 | 25 | 38.091 | F | 0.500 | 0.073  |
| SMM  | 2005 | 165 | 17 | 25 | 13.789 | F | 0.500 | 0.529  |
| V04C | 2005 | 165 | 17 | 25 | 3.108  | F | 0.500 | 0.930  |
| ORV  | 2005 | 165 | 17 | 24 | 20.692 | F | 0.500 | -0.459 |
| RRX  | 2005 | 165 | 17 | 25 | 43.727 | F | 0.500 | -0.319 |
| BCC  | 2005 | 165 | 17 | 25 | 52.704 | F | 0.500 | -1.240 |
| P05C | 2005 | 165 | 17 | 24 | 31.112 | F | 0.500 | -0.801 |

|      |      |     |    |    |        |   |       |        |
|------|------|-----|----|----|--------|---|-------|--------|
| CMB  | 2005 | 165 | 17 | 24 | 45.601 | F | 0.500 | 0.709  |
| MWC  | 2005 | 165 | 17 | 25 | 40.419 | F | 0.500 | -0.657 |
| WDC  | 2005 | 165 | 17 | 24 | 4.007  | F | 0.500 | 1.446  |
| VCS  | 2005 | 165 | 17 | 25 | 37.267 | F | 0.500 | -0.614 |
| CIA  | 2005 | 165 | 17 | 25 | 44.421 | F | 0.500 | -0.802 |
| SBPX | 2005 | 165 | 17 | 25 | 47.584 | F | 0.500 | -0.766 |
| S05C | 2005 | 165 | 17 | 24 | 51.077 | F | 0.500 | -0.437 |
| BFS  | 2005 | 165 | 17 | 25 | 43.824 | F | 0.500 | -0.474 |
| BBR  | 2005 | 165 | 17 | 25 | 49.981 | F | 0.500 | -0.939 |
| PLM  | 2005 | 165 | 17 | 25 | 59.217 | F | 0.500 | -0.503 |
| SN71 | 2005 | 165 | 17 | 24 | 47.827 | F | 0.500 | -0.322 |
| HEC  | 2005 | 165 | 17 | 25 | 49.944 | F | 0.500 | -0.534 |
| HELL | 2005 | 165 | 17 | 25 | 9.183  | F | 0.500 | -0.476 |
| EDW2 | 2005 | 165 | 17 | 25 | 34.528 | F | 0.500 | -0.597 |
| DGR  | 2005 | 165 | 17 | 25 | 54.357 | F | 0.500 | -0.959 |
| SN62 | 2005 | 165 | 17 | 24 | 52.534 | F | 0.500 | 0.041  |
| SN21 | 2005 | 165 | 17 | 25 | 3.141  | F | 0.500 | -0.613 |
| T06C | 2005 | 165 | 17 | 25 | 0.024  | F | 0.500 | -0.193 |
| SN51 | 2005 | 165 | 17 | 24 | 54.582 | F | 0.500 | -0.226 |
| SN42 | 2005 | 165 | 17 | 24 | 59.582 | F | 0.500 | 0.255  |
| BOR  | 2005 | 165 | 17 | 26 | 3.728  | F | 0.500 | -0.345 |
| JCS  | 2005 | 165 | 17 | 26 | 4.268  | F | 0.500 | -0.243 |
| GOR  | 2005 | 165 | 17 | 25 | 57.965 | F | 0.500 | 0.006  |
| SPG  | 2005 | 165 | 17 | 25 | 15.363 | F | 0.500 | -0.853 |
| SN11 | 2005 | 165 | 17 | 25 | 5.806  | F | 0.500 | -0.754 |

|      |      |     |    |         |           |           |         |        |       |
|------|------|-----|----|---------|-----------|-----------|---------|--------|-------|
| 2005 | 191  | 4   | 46 | 34.8936 | -36.31000 | -97.26400 | 10.0000 | 4      | 3.654 |
| PLS  | 2005 | 191 | 5  | 7       | 23.407    | F         | 0.500   | -0.481 |       |
| N02C | 2005 | 191 | 5  | 8       | 54.149    | F         | 0.500   | 1.409  |       |
| BNLO | 2005 | 191 | 5  | 8       | 12.734    | F         | 0.500   | 0.050  |       |
| SN57 | 2005 | 191 | 5  | 8       | 15.454    | F         | 0.500   | 1.359  |       |
| RSS  | 2005 | 191 | 5  | 7       | 25.020    | F         | 0.500   | -0.036 |       |
| SN28 | 2005 | 191 | 5  | 8       | 10.098    | F         | 0.500   | 0.776  |       |
| O04C | 2005 | 191 | 5  | 8       | 41.810    | F         | 0.500   | 0.327  |       |
| CIA  | 2005 | 191 | 5  | 7       | 21.314    | F         | 0.500   | -0.416 |       |
| MNRC | 2005 | 191 | 5  | 8       | 32.797    | F         | 0.500   | 2.031  |       |
| O05C | 2005 | 191 | 5  | 8       | 38.086    | F         | 0.500   | 0.558  |       |
| SN22 | 2005 | 191 | 5  | 8       | 7.477     | F         | 0.500   | 4.348  |       |
| SN47 | 2005 | 191 | 5  | 8       | 12.990    | F         | 0.500   | 1.351  |       |
| EDW2 | 2005 | 191 | 5  | 7       | 35.640    | F         | 0.500   | -1.100 |       |
| SN12 | 2005 | 191 | 5  | 8       | 0.079     | F         | 0.500   | -1.150 |       |
| MWC  | 2005 | 191 | 5  | 7       | 30.068    | F         | 0.500   | 0.105  |       |
| ORV  | 2005 | 191 | 5  | 8       | 35.690    | F         | 0.500   | 1.014  |       |
| VTV  | 2005 | 191 | 5  | 7       | 31.219    | F         | 0.500   | -0.304 |       |
| SN23 | 2005 | 191 | 5  | 8       | 2.657     | F         | 0.500   | -1.467 |       |
| CLC  | 2005 | 191 | 5  | 7       | 46.155    | F         | 0.500   | 0.612  |       |
| T06C | 2005 | 191 | 5  | 8       | 2.402     | F         | 0.500   | -1.373 |       |
| SN38 | 2005 | 191 | 5  | 8       | 12.612    | F         | 0.500   | 1.285  |       |
| SN48 | 2005 | 191 | 5  | 8       | 14.164    | F         | 0.500   | 1.022  |       |
| KCC  | 2005 | 191 | 5  | 8       | 5.579     | F         | 0.500   | -0.641 |       |
| PACP | 2005 | 191 | 5  | 8       | 9.329     | F         | 0.500   | 0.795  |       |
| GSC  | 2005 | 191 | 5  | 7       | 39.164    | F         | 0.500   | 0.978  |       |
| HEC  | 2005 | 191 | 5  | 7       | 32.279    | F         | 0.500   | 0.434  |       |
| MPM  | 2005 | 191 | 5  | 7       | 49.162    | F         | 0.500   | 0.892  |       |
| SN67 | 2005 | 191 | 5  | 8       | 17.669    | F         | 0.500   | 1.599  |       |
| ISA  | 2005 | 191 | 5  | 7       | 46.930    | F         | 0.500   | 0.444  |       |
| PAS  | 2005 | 191 | 5  | 7       | 29.571    | F         | 0.500   | 0.483  |       |
| CWC  | 2005 | 191 | 5  | 7       | 55.727    | F         | 0.500   | 1.990  |       |
| S05C | 2005 | 191 | 5  | 8       | 9.057     | F         | 0.500   | 0.014  |       |
| HELL | 2005 | 191 | 5  | 7       | 57.694    | F         | 0.500   | -1.003 |       |
| PLM  | 2005 | 191 | 5  | 7       | 18.011    | F         | 0.500   | 0.865  |       |
| HAST | 2005 | 191 | 5  | 8       | 3.830     | F         | 0.500   | 0.926  |       |
| SN42 | 2005 | 191 | 5  | 8       | 5.033     | F         | 0.500   | -1.288 |       |

|      |      |     |   |   |        |   |       |        |
|------|------|-----|---|---|--------|---|-------|--------|
| P05C | 2005 | 191 | 5 | 8 | 30.923 | F | 0.500 | 0.886  |
| BOR  | 2005 | 191 | 5 | 7 | 15.765 | F | 0.500 | 1.175  |
| S04C | 2005 | 191 | 5 | 8 | 15.099 | F | 0.500 | 1.569  |
| SN53 | 2005 | 191 | 5 | 8 | 8.875  | F | 0.500 | -0.373 |
| SPG  | 2005 | 191 | 5 | 7 | 52.473 | F | 0.500 | 0.337  |
| LRL  | 2005 | 191 | 5 | 7 | 42.377 | F | 0.500 | 0.110  |
| VCS  | 2005 | 191 | 5 | 7 | 32.648 | F | 0.500 | -0.313 |
| SN52 | 2005 | 191 | 5 | 8 | 7.084  | F | 0.500 | -0.587 |
| R04C | 2005 | 191 | 5 | 8 | 21.113 | F | 0.500 | 1.073  |
| SVD  | 2005 | 191 | 5 | 7 | 27.102 | F | 0.500 | 1.335  |
| SN51 | 2005 | 191 | 5 | 8 | 6.831  | F | 0.500 | -0.721 |
| SN11 | 2005 | 191 | 5 | 7 | 57.888 | F | 0.500 | -1.433 |
| LAVA | 2005 | 191 | 5 | 8 | 25.434 | F | 0.500 | 0.626  |
| SN71 | 2005 | 191 | 5 | 8 | 12.618 | F | 0.500 | 0.233  |
| DGR  | 2005 | 191 | 5 | 7 | 21.616 | F | 0.500 | 0.901  |
| BBR  | 2005 | 191 | 5 | 7 | 28.776 | F | 0.500 | 1.484  |
| SBPX | 2005 | 191 | 5 | 7 | 28.844 | F | 0.500 | 1.121  |
| SN62 | 2005 | 191 | 5 | 8 | 10.752 | F | 0.500 | -0.012 |
| BFS  | 2005 | 191 | 5 | 7 | 29.421 | F | 0.500 | 0.424  |
| CMB  | 2005 | 191 | 5 | 8 | 17.355 | F | 0.500 | 0.722  |
| MPP  | 2005 | 191 | 5 | 7 | 41.660 | F | 0.500 | -0.518 |
| FARB | 2005 | 191 | 5 | 8 | 20.702 | F | 0.500 | 0.032  |
| PKD  | 2005 | 191 | 5 | 7 | 55.953 | F | 0.500 | 0.539  |
| MOD  | 2005 | 191 | 5 | 8 | 55.776 | F | 0.500 | 0.677  |
| TIN  | 2005 | 191 | 5 | 8 | 0.658  | F | 0.500 | 0.204  |

|      |     |    |   |         |           |           |         |   |       |
|------|-----|----|---|---------|-----------|-----------|---------|---|-------|
| 2005 | 194 | 12 | 6 | 16.8415 | -17.84700 | -70.10900 | 79.9000 | 5 | 3.502 |
|------|-----|----|---|---------|-----------|-----------|---------|---|-------|

|      |      |     |    |    |        |   |       |        |
|------|------|-----|----|----|--------|---|-------|--------|
| PLM  | 2005 | 194 | 12 | 25 | 59.053 | F | 0.500 | 1.164  |
| SN62 | 2005 | 194 | 12 | 26 | 51.962 | F | 0.500 | -0.431 |
| P05C | 2005 | 194 | 12 | 27 | 9.840  | F | 0.500 | 0.757  |
| SN71 | 2005 | 194 | 12 | 26 | 55.403 | F | 0.500 | -0.066 |
| BFS  | 2005 | 194 | 12 | 26 | 11.335 | F | 0.500 | 0.670  |
| CMB  | 2005 | 194 | 12 | 26 | 58.646 | F | 0.500 | 0.224  |
| TOV  | 2005 | 194 | 12 | 26 | 18.616 | F | 0.500 | 0.330  |
| SN26 | 2005 | 194 | 12 | 26 | 42.394 | F | 0.500 | 0.279  |
| DJJ  | 2005 | 194 | 12 | 26 | 15.983 | F | 0.500 | 0.613  |
| N02C | 2005 | 194 | 12 | 27 | 37.480 | F | 0.500 | 0.023  |
| SHO  | 2005 | 194 | 12 | 26 | 13.457 | F | 0.500 | 0.162  |
| BCC  | 2005 | 194 | 12 | 26 | 3.366  | F | 0.500 | 1.215  |
| O04C | 2005 | 194 | 12 | 27 | 19.881 | F | 0.500 | 0.396  |
| RPV  | 2005 | 194 | 12 | 26 | 12.681 | F | 0.500 | 0.632  |
| SN22 | 2005 | 194 | 12 | 26 | 47.774 | F | 0.500 | 4.002  |
| M06C | 2005 | 194 | 12 | 27 | 21.938 | F | 0.500 | 0.190  |
| PIN  | 2005 | 194 | 12 | 27 | 43.101 | F | 0.500 | 0.083  |
| SN23 | 2005 | 194 | 12 | 26 | 42.655 | F | 0.500 | -1.169 |
| S04C | 2005 | 194 | 12 | 27 | 2.049  | F | 0.500 | 1.257  |
| SN47 | 2005 | 194 | 12 | 26 | 48.031 | F | 0.500 | 1.271  |
| SN67 | 2005 | 194 | 12 | 26 | 53.734 | F | 0.500 | 1.618  |
| LGU  | 2005 | 194 | 12 | 26 | 19.773 | F | 0.500 | 0.001  |
| SN42 | 2005 | 194 | 12 | 26 | 45.393 | F | 0.500 | -1.725 |
| S05C | 2005 | 194 | 12 | 26 | 52.480 | F | 0.500 | -0.253 |
| BBS  | 2005 | 194 | 12 | 26 | 4.463  | F | 0.500 | 1.425  |
| FUR  | 2005 | 194 | 12 | 26 | 22.610 | F | 0.500 | 0.758  |
| DEC  | 2005 | 194 | 12 | 26 | 16.015 | F | 0.500 | 0.546  |
| T06C | 2005 | 194 | 12 | 26 | 43.923 | F | 0.500 | -2.015 |
| DEV  | 2005 | 194 | 12 | 26 | 1.567  | F | 0.500 | 1.586  |
| SLA  | 2005 | 194 | 12 | 26 | 21.272 | F | 0.500 | 0.680  |
| SN28 | 2005 | 194 | 12 | 26 | 43.478 | F | 0.500 | 1.115  |
| TIN  | 2005 | 194 | 12 | 26 | 36.929 | F | 0.500 | 0.787  |
| CWC  | 2005 | 194 | 12 | 26 | 32.076 | F | 0.500 | 1.470  |
| MOD  | 2005 | 194 | 12 | 27 | 24.987 | F | 0.500 | -0.746 |
| GOR  | 2005 | 194 | 12 | 25 | 59.020 | F | 0.500 | 0.323  |
| SBPX | 2005 | 194 | 12 | 26 | 8.578  | F | 0.500 | 1.168  |

|      |      |     |    |    |        |   |       |        |
|------|------|-----|----|----|--------|---|-------|--------|
| SN37 | 2005 | 194 | 12 | 26 | 45.150 | F | 0.500 | 0.883  |
| EDW2 | 2005 | 194 | 12 | 26 | 16.857 | F | 0.500 | -1.062 |
| GRA  | 2005 | 194 | 12 | 26 | 31.132 | F | 0.500 | 1.402  |
| BBR  | 2005 | 194 | 12 | 26 | 6.715  | F | 0.500 | 1.281  |
| PAS  | 2005 | 194 | 12 | 26 | 14.060 | F | 0.500 | 0.639  |
| SN12 | 2005 | 194 | 12 | 26 | 39.914 | F | 0.500 | -0.864 |
| KCC  | 2005 | 194 | 12 | 26 | 44.626 | F | 0.500 | -1.229 |
| BOR  | 2005 | 194 | 12 | 25 | 54.654 | F | 0.500 | 1.135  |
| R04C | 2005 | 194 | 12 | 27 | 4.602  | F | 0.500 | 1.161  |
| SN38 | 2005 | 194 | 12 | 26 | 45.930 | F | 0.500 | 1.205  |
| TPH  | 2005 | 194 | 12 | 26 | 38.274 | F | 0.500 | 1.052  |
| SVD  | 2005 | 194 | 12 | 26 | 6.787  | F | 0.500 | 1.600  |
| O05C | 2005 | 194 | 12 | 27 | 17.025 | F | 0.500 | 1.308  |
| CLC  | 2005 | 194 | 12 | 26 | 22.305 | F | 0.500 | 0.221  |
| SN53 | 2005 | 194 | 12 | 26 | 49.144 | F | 0.500 | -0.565 |
| MWC  | 2005 | 194 | 12 | 26 | 14.107 | F | 0.500 | 0.676  |
| MPM  | 2005 | 194 | 12 | 26 | 24.025 | F | 0.500 | 0.409  |
| LAVA | 2005 | 194 | 12 | 27 | 6.012  | F | 0.500 | 0.079  |
| SN52 | 2005 | 194 | 12 | 26 | 47.992 | F | 0.500 | -1.208 |
| HELL | 2005 | 194 | 12 | 26 | 38.295 | F | 0.500 | -0.577 |
| ISA  | 2005 | 194 | 12 | 26 | 27.858 | F | 0.500 | 0.447  |
| ORV  | 2005 | 194 | 12 | 27 | 17.299 | F | 0.500 | 0.918  |
| GSC  | 2005 | 194 | 12 | 26 | 13.502 | F | 0.500 | 0.826  |
| CHF  | 2005 | 194 | 12 | 26 | 14.315 | F | 0.500 | 0.346  |
| CAP  | 2005 | 194 | 12 | 26 | 0.905  | F | 0.500 | 0.494  |
| LRL  | 2005 | 194 | 12 | 26 | 20.595 | F | 0.500 | 0.311  |
| SPG  | 2005 | 194 | 12 | 26 | 33.445 | F | 0.500 | 0.320  |
| DGR  | 2005 | 194 | 12 | 26 | 2.332  | F | 0.500 | 1.194  |
| SN11 | 2005 | 194 | 12 | 26 | 38.712 | F | 0.500 | -2.052 |
| SN51 | 2005 | 194 | 12 | 26 | 49.166 | F | 0.500 | -1.158 |
| SN48 | 2005 | 194 | 12 | 26 | 48.262 | F | 0.500 | 1.249  |

|      |      |     |    |         |          |           |         |        |       |
|------|------|-----|----|---------|----------|-----------|---------|--------|-------|
| 2005 | 207  | 12  | 17 | 16.3159 | 52.87100 | 160.10500 | 27.6000 | 6      | 2.046 |
| SN11 | 2005 | 207 | 12 | 34      | 43.654   | F         | 0.500   | -0.799 |       |
| DEV  | 2005 | 207 | 12 | 35      | 29.500   | F         | 0.500   | -1.225 |       |
| YBH  | 2005 | 207 | 12 | 33      | 32.658   | F         | 0.500   | 0.480  |       |
| GSC  | 2005 | 207 | 12 | 35      | 16.192   | F         | 0.500   | -0.323 |       |
| OSI  | 2005 | 207 | 12 | 35      | 8.078    | F         | 0.500   | -0.424 |       |
| PACP | 2005 | 207 | 12 | 34      | 27.157   | F         | 0.500   | 0.554  |       |
| GRA  | 2005 | 207 | 12 | 34      | 58.167   | F         | 0.500   | 1.607  |       |
| S05C | 2005 | 207 | 12 | 34      | 30.322   | F         | 0.500   | -0.438 |       |
| ISA  | 2005 | 207 | 12 | 34      | 59.076   | F         | 0.500   | -1.440 |       |
| O04C | 2005 | 207 | 12 | 33      | 57.688   | F         | 0.500   | -0.217 |       |
| SHO  | 2005 | 207 | 12 | 35      | 15.647   | F         | 0.500   | 0.696  |       |
| O05C | 2005 | 207 | 12 | 34      | 1.512    | F         | 0.500   | -0.763 |       |
| DGR  | 2005 | 207 | 12 | 35      | 28.852   | F         | 0.500   | -1.319 |       |
| MWC  | 2005 | 207 | 12 | 35      | 16.577   | F         | 0.500   | -0.863 |       |
| CLC  | 2005 | 207 | 12 | 35      | 5.460    | F         | 0.500   | -0.493 |       |
| SBPX | 2005 | 207 | 12 | 35      | 22.913   | F         | 0.500   | -0.650 |       |
| SN48 | 2005 | 207 | 12 | 34      | 38.395   | F         | 0.500   | 1.199  |       |
| SN43 | 2005 | 207 | 12 | 34      | 37.232   | F         | 0.500   | 0.005  |       |
| MOD  | 2005 | 207 | 12 | 33      | 48.749   | F         | 0.500   | -0.926 |       |
| SN53 | 2005 | 207 | 12 | 34      | 34.744   | F         | 0.500   | 0.036  |       |
| BOR  | 2005 | 207 | 12 | 35      | 38.085   | F         | 0.500   | -0.001 |       |
| SN52 | 2005 | 207 | 12 | 34      | 34.856   | F         | 0.500   | 0.153  |       |
| SN74 | 2005 | 207 | 12 | 34      | 28.369   | F         | 0.500   | 0.106  |       |
| SN44 | 2005 | 207 | 12 | 34      | 38.842   | F         | 0.500   | 1.037  |       |
| SN24 | 2005 | 207 | 12 | 34      | 43.362   | F         | 0.500   | 1.096  |       |
| PLM  | 2005 | 207 | 12 | 35      | 34.141   | F         | 0.500   | -0.224 |       |
| SN47 | 2005 | 207 | 12 | 34      | 38.996   | F         | 0.500   | 1.307  |       |
| SN71 | 2005 | 207 | 12 | 34      | 27.014   | F         | 0.500   | -0.394 |       |
| HEC  | 2005 | 207 | 12 | 35      | 24.616   | F         | 0.500   | 0.220  |       |
| SN23 | 2005 | 207 | 12 | 34      | 42.172   | F         | 0.500   | 0.301  |       |

|      |      |     |    |    |        |   |       |        |
|------|------|-----|----|----|--------|---|-------|--------|
| TPH  | 2005 | 207 | 12 | 34 | 48.282 | F | 0.500 | 0.120  |
| CAP  | 2005 | 207 | 12 | 35 | 30.699 | F | 0.500 | -0.401 |
| KCC  | 2005 | 207 | 12 | 34 | 39.773 | F | 0.500 | 0.886  |
| BFS  | 2005 | 207 | 12 | 35 | 20.286 | F | 0.500 | 0.199  |
| BBR  | 2005 | 207 | 12 | 35 | 24.826 | F | 0.500 | -0.884 |
| SN38 | 2005 | 207 | 12 | 34 | 41.190 | F | 0.500 | 1.372  |
| SN28 | 2005 | 207 | 12 | 34 | 44.448 | F | 0.500 | 1.935  |
| LAVA | 2005 | 207 | 12 | 34 | 14.659 | F | 0.500 | -0.083 |
| SN95 | 2005 | 207 | 12 | 34 | 22.699 | F | 0.500 | 0.131  |
| SN51 | 2005 | 207 | 12 | 34 | 33.470 | F | 0.500 | -0.179 |
| SN62 | 2005 | 207 | 12 | 34 | 30.829 | F | 0.500 | -0.422 |
| CHF  | 2005 | 207 | 12 | 35 | 16.550 | F | 0.500 | 0.059  |
| SN73 | 2005 | 207 | 12 | 34 | 28.336 | F | 0.500 | 0.056  |
| HELL | 2005 | 207 | 12 | 34 | 46.633 | F | 0.500 | -0.531 |
| SN21 | 2005 | 207 | 12 | 34 | 41.398 | F | 0.500 | -0.557 |

|      |      |     |   |         |          |            |         |        |       |
|------|------|-----|---|---------|----------|------------|---------|--------|-------|
| 2005 | 210  | 5   | 0 | 32.3474 | 52.90600 | -168.64700 | 50.3000 | 7      | 2.257 |
| RPV  | 2005 | 210 | 5 | 14      | 7.893    | F          | 0.500   | -0.618 |       |
| BOR  | 2005 | 210 | 5 | 14      | 30.563   | F          | 0.500   | -0.536 |       |
| HELL | 2005 | 210 | 5 | 13      | 32.208   | F          | 0.500   | -1.049 |       |
| RCT  | 2005 | 210 | 5 | 13      | 33.771   | F          | 0.500   | -0.831 |       |
| LAVA | 2005 | 210 | 5 | 12      | 56.329   | F          | 0.500   | -0.561 |       |
| SN11 | 2005 | 210 | 5 | 13      | 29.388   | F          | 0.500   | -0.743 |       |
| DGR  | 2005 | 210 | 5 | 14      | 20.522   | F          | 0.500   | -1.405 |       |
| SBPX | 2005 | 210 | 5 | 14      | 13.686   | F          | 0.500   | -0.693 |       |
| SN45 | 2005 | 210 | 5 | 13      | 22.847   | F          | 0.500   | -0.198 |       |
| SN21 | 2005 | 210 | 5 | 13      | 26.346   | F          | 0.500   | -0.833 |       |
| SN56 | 2005 | 210 | 5 | 13      | 18.589   | F          | 0.500   | -0.999 |       |
| PLM  | 2005 | 210 | 5 | 14      | 25.686   | F          | 0.500   | -0.917 |       |
| SN23 | 2005 | 210 | 5 | 13      | 26.990   | F          | 0.500   | -0.285 |       |
| SN85 | 2005 | 210 | 5 | 13      | 8.502    | F          | 0.500   | -0.627 |       |
| GOR  | 2005 | 210 | 5 | 14      | 24.157   | F          | 0.500   | -0.884 |       |
| CLC  | 2005 | 210 | 5 | 13      | 53.691   | F          | 0.500   | -1.075 |       |
| SN84 | 2005 | 210 | 5 | 13      | 7.794    | F          | 0.500   | -0.727 |       |
| SN44 | 2005 | 210 | 5 | 13      | 22.754   | F          | 0.500   | -0.141 |       |
| SN95 | 2005 | 210 | 5 | 13      | 5.333    | F          | 0.500   | -0.395 |       |
| BFS  | 2005 | 210 | 5 | 14      | 9.838    | F          | 0.500   | -0.446 |       |
| SN42 | 2005 | 210 | 5 | 13      | 21.745   | F          | 0.500   | -0.636 |       |
| MSJ  | 2005 | 210 | 5 | 14      | 19.361   | F          | 0.500   | -1.314 |       |
| BBR  | 2005 | 210 | 5 | 14      | 15.581   | F          | 0.500   | -1.353 |       |
| SN52 | 2005 | 210 | 5 | 13      | 18.378   | F          | 0.500   | -0.757 |       |
| SN62 | 2005 | 210 | 5 | 13      | 14.602   | F          | 0.500   | -0.584 |       |
| VCS  | 2005 | 210 | 5 | 14      | 3.117    | F          | 0.500   | -0.471 |       |
| SN53 | 2005 | 210 | 5 | 13      | 18.506   | F          | 0.500   | -0.654 |       |
| SPG  | 2005 | 210 | 5 | 13      | 39.555   | F          | 0.500   | -0.794 |       |
| SN51 | 2005 | 210 | 5 | 13      | 17.449   | F          | 0.500   | -0.358 |       |
| SN73 | 2005 | 210 | 5 | 13      | 11.495   | F          | 0.500   | -0.446 |       |
| KCC  | 2005 | 210 | 5 | 13      | 23.845   | F          | 0.500   | -0.231 |       |
| SN74 | 2005 | 210 | 5 | 13      | 11.593   | F          | 0.500   | -0.476 |       |
| SN43 | 2005 | 210 | 5 | 13      | 21.645   | F          | 0.500   | -0.415 |       |
| BBS  | 2005 | 210 | 5 | 14      | 18.433   | F          | 0.500   | -1.043 |       |
| CVS  | 2005 | 210 | 5 | 12      | 46.048   | F          | 0.500   | 1.175  |       |
| ISA  | 2005 | 210 | 5 | 13      | 43.981   | F          | 0.500   | -4.264 |       |
| M06C | 2005 | 210 | 5 | 12      | 36.164   | F          | 0.500   | -0.163 |       |
| SN38 | 2005 | 210 | 5 | 13      | 25.346   | F          | 0.500   | -0.705 |       |
| SN46 | 2005 | 210 | 5 | 13      | 23.907   | F          | 0.500   | 0.130  |       |
| SHO  | 2005 | 210 | 5 | 14      | 4.344    | F          | 0.500   | -1.472 |       |
| ADO  | 2005 | 210 | 5 | 14      | 8.842    | F          | 0.500   | -0.265 |       |
| SN25 | 2005 | 210 | 5 | 13      | 29.991   | F          | 0.500   | 0.245  |       |
| OSI  | 2005 | 210 | 5 | 13      | 56.496   | F          | 0.500   | -0.290 |       |
| O04C | 2005 | 210 | 5 | 12      | 37.966   | F          | 0.500   | -0.913 |       |
| S05C | 2005 | 210 | 5 | 13      | 13.590   | F          | 0.500   | -0.814 |       |
| FUR  | 2005 | 210 | 5 | 13      | 53.748   | F          | 0.500   | -0.848 |       |

|      |      |     |   |    |        |   |       |        |
|------|------|-----|---|----|--------|---|-------|--------|
| LRL  | 2005 | 210 | 5 | 13 | 55.423 | F | 0.500 | -2.082 |
| WVOR | 2005 | 210 | 5 | 12 | 40.986 | F | 0.500 | -1.254 |
| PHL  | 2005 | 210 | 5 | 13 | 31.969 | F | 0.500 | 0.010  |

|      |     |   |    |         |          |           |         |   |       |
|------|-----|---|----|---------|----------|-----------|---------|---|-------|
| 2005 | 213 | 4 | 40 | 39.2479 | 46.99500 | 153.91100 | 16.9000 | 8 | 2.538 |
|------|-----|---|----|---------|----------|-----------|---------|---|-------|

|      |      |     |   |    |        |   |       |        |
|------|------|-----|---|----|--------|---|-------|--------|
| BFS  | 2005 | 213 | 4 | 59 | 58.222 | F | 0.500 | -1.022 |
| SN37 | 2005 | 213 | 4 | 59 | 25.261 | F | 0.500 | 1.420  |
| SN28 | 2005 | 213 | 4 | 59 | 27.214 | F | 0.500 | 1.268  |
| SN21 | 2005 | 213 | 4 | 59 | 22.704 | F | 0.500 | -1.183 |
| SN16 | 2005 | 213 | 4 | 59 | 31.200 | F | 0.500 | 1.431  |
| P05C | 2005 | 213 | 4 | 58 | 55.167 | F | 0.500 | -0.586 |
| SN47 | 2005 | 213 | 4 | 59 | 22.032 | F | 0.500 | 0.888  |
| SN73 | 2005 | 213 | 4 | 59 | 11.117 | F | 0.500 | -0.192 |
| SN48 | 2005 | 213 | 4 | 59 | 21.582 | F | 0.500 | 0.672  |
| SN11 | 2005 | 213 | 4 | 59 | 25.097 | F | 0.500 | -1.168 |
| SN95 | 2005 | 213 | 4 | 59 | 6.483  | F | 0.500 | 0.294  |
| VCS  | 2005 | 213 | 4 | 59 | 52.852 | F | 0.500 | -0.817 |
| CMB  | 2005 | 213 | 4 | 59 | 7.766  | F | 0.500 | 0.505  |
| SN38 | 2005 | 213 | 4 | 59 | 24.364 | F | 0.500 | 0.958  |
| SN27 | 2005 | 213 | 4 | 59 | 28.518 | F | 0.500 | 2.075  |
| SN84 | 2005 | 213 | 4 | 59 | 8.629  | F | 0.500 | 0.045  |
| HUMO | 2005 | 213 | 4 | 58 | 11.633 | F | 0.500 | 0.783  |
| N02C | 2005 | 213 | 4 | 58 | 23.944 | F | 0.500 | 2.034  |
| MWC  | 2005 | 213 | 4 | 59 | 54.517 | F | 0.500 | -1.988 |
| LGU  | 2005 | 213 | 4 | 59 | 48.036 | F | 0.500 | -1.214 |
| M02C | 2005 | 213 | 4 | 58 | 22.969 | F | 0.500 | 1.827  |
| WDC  | 2005 | 213 | 4 | 58 | 30.714 | F | 0.500 | 0.879  |
| M04C | 2005 | 213 | 4 | 58 | 27.132 | F | 0.500 | 0.722  |
| M05C | 2005 | 213 | 4 | 58 | 35.652 | F | 0.500 | 0.478  |
| S05C | 2005 | 213 | 4 | 59 | 12.278 | F | 0.500 | -0.888 |
| ELFS | 2005 | 213 | 4 | 58 | 44.808 | F | 0.500 | 0.563  |
| GSC  | 2005 | 213 | 4 | 59 | 55.939 | F | 0.500 | -1.125 |
| SN26 | 2005 | 213 | 4 | 59 | 27.828 | F | 0.500 | 1.842  |
| TIN  | 2005 | 213 | 4 | 59 | 32.578 | F | 0.500 | 0.310  |
| SN46 | 2005 | 213 | 4 | 59 | 22.973 | F | 0.500 | 1.486  |
| KCC  | 2005 | 213 | 4 | 59 | 22.025 | F | 0.500 | 0.590  |
| R04C | 2005 | 213 | 4 | 59 | 0.753  | F | 0.500 | -0.194 |
| SN71 | 2005 | 213 | 4 | 59 | 9.571  | F | 0.500 | -0.613 |
| O04C | 2005 | 213 | 4 | 58 | 43.948 | F | 0.500 | 0.058  |
| LRL  | 2005 | 213 | 4 | 59 | 47.502 | F | 0.500 | -1.585 |
| ORV  | 2005 | 213 | 4 | 58 | 45.474 | F | 0.500 | -0.870 |
| SN36 | 2005 | 213 | 4 | 59 | 26.202 | F | 0.500 | 2.138  |
| MOD  | 2005 | 213 | 4 | 58 | 37.677 | F | 0.500 | 0.004  |
| SN57 | 2005 | 213 | 4 | 59 | 18.532 | F | 0.500 | 0.745  |
| SN56 | 2005 | 213 | 4 | 59 | 18.469 | F | 0.500 | 0.424  |
| TPH  | 2005 | 213 | 4 | 59 | 31.580 | F | 0.500 | -0.349 |
| SN45 | 2005 | 213 | 4 | 59 | 22.478 | F | 0.500 | 1.710  |
| SPG  | 2005 | 213 | 4 | 59 | 32.987 | F | 0.500 | -1.707 |
| BBR  | 2005 | 213 | 5 | 0  | 3.279  | F | 0.500 | -1.771 |
| SHO  | 2005 | 213 | 4 | 59 | 55.826 | F | 0.500 | -0.455 |
| BOR  | 2005 | 213 | 5 | 0  | 15.513 | F | 0.500 | -0.816 |
| DGR  | 2005 | 213 | 5 | 0  | 7.116  | F | 0.500 | -1.629 |
| SN43 | 2005 | 213 | 4 | 59 | 19.715 | F | 0.500 | -0.176 |
| SN86 | 2005 | 213 | 4 | 59 | 8.898  | F | 0.500 | 0.090  |
| MPM  | 2005 | 213 | 4 | 59 | 45.107 | F | 0.500 | -0.932 |
| SN51 | 2005 | 213 | 4 | 59 | 15.459 | F | 0.500 | -0.539 |
| PLM  | 2005 | 213 | 5 | 0  | 11.584 | F | 0.500 | -1.070 |
| SN42 | 2005 | 213 | 4 | 59 | 19.620 | F | 0.500 | -0.331 |
| SN23 | 2005 | 213 | 4 | 59 | 24.098 | F | 0.500 | -0.105 |
| SN24 | 2005 | 213 | 4 | 59 | 25.667 | F | 0.500 | 0.827  |
| SN53 | 2005 | 213 | 4 | 59 | 17.069 | F | 0.500 | -0.388 |
| HEC  | 2005 | 213 | 5 | 0  | 3.887  | F | 0.500 | -0.611 |
| O05C | 2005 | 213 | 4 | 58 | 47.452 | F | 0.500 | -0.345 |

|      |      |     |   |    |        |   |       |        |
|------|------|-----|---|----|--------|---|-------|--------|
| VTV  | 2005 | 213 | 4 | 59 | 58.088 | F | 0.500 | -0.916 |
| SN12 | 2005 | 213 | 4 | 59 | 26.499 | F | 0.500 | -0.597 |
| LAVA | 2005 | 213 | 4 | 58 | 58.886 | F | 0.500 | 0.037  |
| CLC  | 2005 | 213 | 4 | 59 | 45.884 | F | 0.500 | -1.120 |
| SN44 | 2005 | 213 | 4 | 59 | 21.214 | F | 0.500 | 0.616  |
| EDW2 | 2005 | 213 | 4 | 59 | 50.242 | F | 0.500 | -0.973 |
| SN67 | 2005 | 213 | 4 | 59 | 16.111 | F | 0.500 | 0.554  |

|      |     |    |    |         |           |            |         |   |       |
|------|-----|----|----|---------|-----------|------------|---------|---|-------|
| 2005 | 219 | 11 | 35 | 31.5331 | -14.44900 | -177.29300 | 10.0000 | 9 | 5.393 |
|------|-----|----|----|---------|-----------|------------|---------|---|-------|

|      |      |     |    |    |        |   |       |        |
|------|------|-----|----|----|--------|---|-------|--------|
| S05C | 2005 | 219 | 11 | 56 | 42.914 | F | 0.500 | -0.809 |
| SHO  | 2005 | 219 | 11 | 57 | 6.771  | F | 0.500 | 0.036  |
| FUR  | 2005 | 219 | 11 | 57 | 6.826  | F | 0.500 | 1.949  |
| SN28 | 2005 | 219 | 11 | 57 | 5.746  | F | 0.500 | 2.204  |
| THX  | 2005 | 219 | 11 | 56 | 55.667 | F | 0.500 | 0.308  |
| TIN  | 2005 | 219 | 11 | 56 | 58.364 | F | 0.500 | 0.211  |
| CIA  | 2005 | 219 | 11 | 56 | 34.381 | F | 0.500 | -1.643 |
| SLA  | 2005 | 219 | 11 | 56 | 59.230 | F | 0.500 | 0.239  |
| HEC  | 2005 | 219 | 11 | 56 | 59.902 | F | 0.500 | -0.511 |
| TOV  | 2005 | 219 | 11 | 56 | 34.971 | F | 0.500 | -1.750 |
| SDD  | 2005 | 219 | 11 | 56 | 42.547 | F | 0.500 | -0.118 |
| SN48 | 2005 | 219 | 11 | 57 | 3.686  | F | 0.500 | 1.517  |
| N02C | 2005 | 219 | 11 | 56 | 42.951 | F | 0.500 | -0.863 |
| SN26 | 2005 | 219 | 11 | 57 | 0.085  | F | 0.500 | 0.910  |
| GSC  | 2005 | 219 | 11 | 56 | 59.507 | F | 0.500 | 0.148  |
| SN16 | 2005 | 219 | 11 | 57 | 0.858  | F | 0.500 | 1.031  |
| SN38 | 2005 | 219 | 11 | 57 | 4.784  | F | 0.500 | 1.801  |
| O05C | 2005 | 219 | 11 | 56 | 55.236 | F | 0.500 | 0.151  |
| HUMO | 2005 | 219 | 11 | 56 | 58.477 | F | 0.500 | 0.794  |
| SN37 | 2005 | 219 | 11 | 57 | 1.611  | F | 0.500 | 1.293  |
| SN21 | 2005 | 219 | 11 | 56 | 46.742 | F | 0.500 | -0.047 |
| M03C | 2005 | 219 | 11 | 56 | 54.824 | F | 0.500 | -0.269 |
| PKD  | 2005 | 219 | 11 | 56 | 28.830 | F | 0.500 | -4.725 |
| SN57 | 2005 | 219 | 11 | 57 | 0.325  | F | 0.500 | 1.407  |
| SN47 | 2005 | 219 | 11 | 57 | 1.188  | F | 0.500 | 1.362  |
| S08C | 2005 | 219 | 11 | 57 | 2.387  | F | 0.500 | 0.942  |
| R07C | 2005 | 219 | 11 | 56 | 59.270 | F | 0.500 | 1.194  |
| DEC  | 2005 | 219 | 11 | 56 | 40.479 | F | 0.500 | -0.784 |
| RRX  | 2005 | 219 | 11 | 56 | 55.127 | F | 0.500 | -0.313 |
| YBH  | 2005 | 219 | 11 | 56 | 54.593 | F | 0.500 | 0.789  |
| CWC  | 2005 | 219 | 11 | 56 | 55.967 | F | 0.500 | -0.106 |
| GOR  | 2005 | 219 | 11 | 56 | 43.404 | F | 0.500 | -0.911 |
| ISA  | 2005 | 219 | 11 | 56 | 48.106 | F | 0.500 | -0.131 |
| MPM  | 2005 | 219 | 11 | 56 | 59.315 | F | 0.500 | 1.015  |
| JCS  | 2005 | 219 | 11 | 56 | 48.711 | F | 0.500 | -0.685 |
| MWC  | 2005 | 219 | 11 | 56 | 42.664 | F | 0.500 | -1.133 |
| MGE  | 2005 | 219 | 11 | 56 | 55.699 | F | 0.500 | 1.118  |
| ARV  | 2005 | 219 | 11 | 56 | 42.096 | F | 0.500 | -0.072 |
| OSI  | 2005 | 219 | 11 | 56 | 39.886 | F | 0.500 | -0.574 |
| M02C | 2005 | 219 | 11 | 56 | 51.690 | F | 0.500 | 1.067  |
| CLC  | 2005 | 219 | 11 | 56 | 56.875 | F | 0.500 | 0.851  |
| BBS  | 2005 | 219 | 11 | 56 | 51.233 | F | 0.500 | 0.878  |
| DEV  | 2005 | 219 | 11 | 56 | 54.246 | F | 0.500 | 0.387  |
| R04C | 2005 | 219 | 11 | 56 | 43.698 | F | 0.500 | -0.795 |
| PAS  | 2005 | 219 | 11 | 56 | 41.285 | F | 0.500 | -0.642 |
| SN25 | 2005 | 219 | 11 | 56 | 57.342 | F | 0.500 | 0.673  |
| CAP  | 2005 | 219 | 11 | 56 | 45.426 | F | 0.500 | -0.411 |
| PLM  | 2005 | 219 | 11 | 56 | 48.484 | F | 0.500 | -0.071 |
| SN86 | 2005 | 219 | 11 | 56 | 55.003 | F | 0.500 | -0.041 |
| SN45 | 2005 | 219 | 11 | 56 | 56.433 | F | 0.500 | 0.832  |
| PIN  | 2005 | 219 | 11 | 57 | 19.114 | F | 0.500 | 0.102  |
| SN36 | 2005 | 219 | 11 | 57 | 0.340  | F | 0.500 | 1.523  |
| PDU  | 2005 | 219 | 11 | 56 | 45.604 | F | 0.500 | -0.494 |
| SN56 | 2005 | 219 | 11 | 56 | 57.290 | F | 0.500 | 0.549  |



|      |      |     |    |    |        |   |       |        |
|------|------|-----|----|----|--------|---|-------|--------|
| CHF  | 2005 | 219 | 11 | 56 | 43.439 | F | 0.500 | -1.039 |
| P05C | 2005 | 219 | 11 | 56 | 53.717 | F | 0.500 | 0.108  |
| SN12 | 2005 | 219 | 11 | 56 | 50.522 | F | 0.500 | -0.744 |
| LRL  | 2005 | 219 | 11 | 56 | 54.289 | F | 0.500 | 0.799  |
| DGR  | 2005 | 219 | 11 | 56 | 48.469 | F | 0.500 | -0.246 |
| VTV  | 2005 | 219 | 11 | 56 | 51.155 | F | 0.500 | 0.052  |
| BCC  | 2005 | 219 | 11 | 56 | 46.867 | F | 0.500 | 0.551  |
| SVD  | 2005 | 219 | 11 | 56 | 50.899 | F | 0.500 | 0.264  |
| SN44 | 2005 | 219 | 11 | 56 | 53.101 | F | 0.500 | 0.274  |
| SN23 | 2005 | 219 | 11 | 56 | 50.834 | F | 0.500 | -0.530 |
| SN24 | 2005 | 219 | 11 | 56 | 54.017 | F | 0.500 | 0.087  |
| SBPX | 2005 | 219 | 11 | 56 | 50.448 | F | 0.500 | -0.027 |
| WDC  | 2005 | 219 | 11 | 56 | 48.075 | F | 0.500 | 0.549  |
| SPG  | 2005 | 219 | 11 | 56 | 47.765 | F | 0.500 | -0.304 |
| SN51 | 2005 | 219 | 11 | 56 | 44.644 | F | 0.500 | -0.423 |
| SN43 | 2005 | 219 | 11 | 56 | 50.800 | F | 0.500 | -0.122 |
| BBR  | 2005 | 219 | 11 | 56 | 53.477 | F | 0.500 | 0.286  |
| VCS  | 2005 | 219 | 11 | 56 | 43.605 | F | 0.500 | -0.742 |
| SN85 | 2005 | 219 | 11 | 56 | 52.091 | F | 0.500 | -0.406 |
| BOR  | 2005 | 219 | 11 | 56 | 51.996 | F | 0.500 | 0.371  |
| SN11 | 2005 | 219 | 11 | 56 | 46.609 | F | 0.500 | -0.831 |
| SN74 | 2005 | 219 | 11 | 56 | 50.412 | F | 0.500 | -0.255 |
| SN22 | 2005 | 219 | 11 | 56 | 48.569 | F | 0.500 | -0.823 |
| ORV  | 2005 | 219 | 11 | 56 | 48.629 | F | 0.500 | 0.224  |
| SN71 | 2005 | 219 | 11 | 56 | 43.945 | F | 0.500 | -0.720 |
| BFS  | 2005 | 219 | 11 | 56 | 46.445 | F | 0.500 | -0.355 |
| SN42 | 2005 | 219 | 11 | 56 | 48.663 | F | 0.500 | -0.172 |
| T06C | 2005 | 219 | 11 | 56 | 45.662 | F | 0.500 | -0.774 |
| EDW2 | 2005 | 219 | 11 | 56 | 47.331 | F | 0.500 | -0.242 |
| SN84 | 2005 | 219 | 11 | 56 | 49.899 | F | 0.500 | -0.397 |
| LAVA | 2005 | 219 | 11 | 56 | 48.882 | F | 0.500 | -0.209 |
| SN52 | 2005 | 219 | 11 | 56 | 47.407 | F | 0.500 | -0.188 |
| SN63 | 2005 | 219 | 11 | 56 | 49.827 | F | 0.500 | -0.451 |
| CMB  | 2005 | 219 | 11 | 56 | 47.545 | F | 0.500 | 0.140  |
| SN62 | 2005 | 219 | 11 | 56 | 47.400 | F | 0.500 | -0.372 |
| SN73 | 2005 | 219 | 11 | 56 | 47.860 | F | 0.500 | -0.471 |
| SN53 | 2005 | 219 | 11 | 56 | 49.621 | F | 0.500 | -0.310 |

|      |      |     |    |        |           |            |         |        |       |
|------|------|-----|----|--------|-----------|------------|---------|--------|-------|
| 2005 | 219  | 14  | 41 | 7.1514 | -14.43500 | -177.24200 | 10.0000 | 10     | 6.171 |
| SAO  | 2005 | 219 | 15 | 2      | 6.555     | F          | 0.500   | -0.373 |       |
| GRA  | 2005 | 219 | 15 | 2      | 39.066    | F          | 0.500   | -0.340 |       |
| M04C | 2005 | 219 | 15 | 2      | 35.638    | F          | 0.500   | 0.465  |       |
| M05C | 2005 | 219 | 15 | 2      | 37.269    | F          | 0.500   | -0.189 |       |
| S04C | 2005 | 219 | 15 | 2      | 11.845    | F          | 0.500   | -0.394 |       |
| O04C | 2005 | 219 | 15 | 2      | 30.545    | F          | 0.500   | -0.878 |       |
| R06C | 2005 | 219 | 15 | 2      | 33.111    | F          | 0.500   | 0.530  |       |
| PKD  | 2005 | 219 | 15 | 2      | 9.092     | F          | 0.500   | 0.427  |       |
| WVOR | 2005 | 219 | 15 | 2      | 59.793    | F          | 0.500   | -0.943 |       |
| SHO  | 2005 | 219 | 15 | 2      | 41.875    | F          | 0.500   | 0.022  |       |
| MGE  | 2005 | 219 | 15 | 2      | 29.944    | F          | 0.500   | 0.258  |       |
| DEC  | 2005 | 219 | 15 | 2      | 17.351    | F          | 0.500   | 0.985  |       |
| SDD  | 2005 | 219 | 15 | 2      | 18.214    | F          | 0.500   | 0.450  |       |
| RPV  | 2005 | 219 | 15 | 2      | 12.847    | F          | 0.500   | -0.229 |       |
| O05C | 2005 | 219 | 15 | 2      | 29.495    | F          | 0.500   | -0.732 |       |
| PACP | 2005 | 219 | 15 | 2      | 9.402     | F          | 0.500   | -0.319 |       |
| FUR  | 2005 | 219 | 15 | 2      | 40.544    | F          | 0.500   | 0.548  |       |
| TIN  | 2005 | 219 | 15 | 2      | 33.475    | F          | 0.500   | 0.200  |       |
| CIA  | 2005 | 219 | 15 | 2      | 11.020    | F          | 0.500   | -0.100 |       |
| HEC  | 2005 | 219 | 15 | 2      | 34.592    | F          | 0.500   | -0.930 |       |
| SUTB | 2005 | 219 | 15 | 2      | 18.846    | F          | 0.500   | -0.766 |       |
| SLA  | 2005 | 219 | 15 | 2      | 34.687    | F          | 0.500   | 0.579  |       |
| HUMO | 2005 | 219 | 15 | 2      | 33.825    | F          | 0.500   | 0.980  |       |
| SN28 | 2005 | 219 | 15 | 2      | 39.970    | F          | 0.500   | 1.303  |       |

|      |      |     |    |   |        |   |       |        |
|------|------|-----|----|---|--------|---|-------|--------|
| SN86 | 2005 | 219 | 15 | 2 | 29.829 | F | 0.500 | -0.346 |
| S05C | 2005 | 219 | 15 | 2 | 18.095 | F | 0.500 | -0.748 |
| YBH  | 2005 | 219 | 15 | 2 | 29.884 | F | 0.500 | 0.927  |
| M02C | 2005 | 219 | 15 | 2 | 27.081 | F | 0.500 | 1.311  |
| DEV  | 2005 | 219 | 15 | 2 | 28.796 | F | 0.500 | -0.168 |
| SN16 | 2005 | 219 | 15 | 2 | 35.177 | F | 0.500 | 0.225  |
| MWC  | 2005 | 219 | 15 | 2 | 18.252 | F | 0.500 | -0.647 |
| DJJ  | 2005 | 219 | 15 | 2 | 14.312 | F | 0.500 | -0.196 |
| N02C | 2005 | 219 | 15 | 2 | 19.934 | F | 0.500 | 0.977  |
| GSC  | 2005 | 219 | 15 | 2 | 34.265 | F | 0.500 | -0.205 |
| ISA  | 2005 | 219 | 15 | 2 | 22.764 | F | 0.500 | -0.584 |
| OSI  | 2005 | 219 | 15 | 2 | 15.694 | F | 0.500 | 0.130  |
| SN47 | 2005 | 219 | 15 | 2 | 36.258 | F | 0.500 | 1.303  |
| R07C | 2005 | 219 | 15 | 2 | 34.490 | F | 0.500 | 1.285  |
| BBS  | 2005 | 219 | 15 | 2 | 25.878 | F | 0.500 | 0.420  |
| R04C | 2005 | 219 | 15 | 2 | 18.796 | F | 0.500 | -0.823 |
| SN25 | 2005 | 219 | 15 | 2 | 32.507 | F | 0.500 | 0.713  |
| GOR  | 2005 | 219 | 15 | 2 | 18.597 | F | 0.500 | -0.813 |
| P05C | 2005 | 219 | 15 | 2 | 28.945 | F | 0.500 | 0.201  |
| SN84 | 2005 | 219 | 15 | 2 | 24.765 | F | 0.500 | -0.658 |
| PDU  | 2005 | 219 | 15 | 2 | 20.668 | F | 0.500 | -0.532 |
| SBPX | 2005 | 219 | 15 | 2 | 25.442 | F | 0.500 | -0.137 |
| MPM  | 2005 | 219 | 15 | 2 | 34.427 | F | 0.500 | 1.009  |
| SPG  | 2005 | 219 | 15 | 2 | 22.352 | F | 0.500 | -0.832 |
| CWC  | 2005 | 219 | 15 | 2 | 31.730 | F | 0.500 | 0.538  |
| SN36 | 2005 | 219 | 15 | 2 | 35.507 | F | 0.500 | 1.563  |
| SN37 | 2005 | 219 | 15 | 2 | 36.730 | F | 0.500 | 1.286  |
| SN48 | 2005 | 219 | 15 | 2 | 38.405 | F | 0.500 | 1.107  |
| SN27 | 2005 | 219 | 15 | 2 | 37.325 | F | 0.500 | 1.325  |
| SN95 | 2005 | 219 | 15 | 2 | 24.955 | F | 0.500 | -0.741 |
| WDC  | 2005 | 219 | 15 | 2 | 22.681 | F | 0.500 | 0.013  |
| PAS  | 2005 | 219 | 15 | 2 | 16.694 | F | 0.500 | -0.335 |
| SN12 | 2005 | 219 | 15 | 2 | 25.211 | F | 0.500 | -1.175 |
| PLM  | 2005 | 219 | 15 | 2 | 23.629 | F | 0.500 | -0.025 |
| SN38 | 2005 | 219 | 15 | 2 | 39.505 | F | 0.500 | 1.391  |
| SN44 | 2005 | 219 | 15 | 2 | 27.421 | F | 0.500 | -0.530 |
| DGR  | 2005 | 219 | 15 | 2 | 23.662 | F | 0.500 | -0.152 |
| SN23 | 2005 | 219 | 15 | 2 | 25.266 | F | 0.500 | -1.219 |
| BOR  | 2005 | 219 | 15 | 2 | 26.741 | F | 0.500 | 0.016  |
| S08C | 2005 | 219 | 15 | 2 | 37.258 | F | 0.500 | 0.689  |
| LAVA | 2005 | 219 | 15 | 2 | 23.770 | F | 0.500 | -0.450 |
| CLC  | 2005 | 219 | 15 | 2 | 31.985 | F | 0.500 | 0.845  |
| VCS  | 2005 | 219 | 15 | 2 | 18.542 | F | 0.500 | -0.908 |
| SN51 | 2005 | 219 | 15 | 2 | 20.036 | F | 0.500 | -0.150 |
| SN43 | 2005 | 219 | 15 | 2 | 25.418 | F | 0.500 | -0.627 |
| CHF  | 2005 | 219 | 15 | 2 | 19.196 | F | 0.500 | -0.386 |
| BFS  | 2005 | 219 | 15 | 2 | 21.344 | F | 0.500 | -0.559 |
| LRL  | 2005 | 219 | 15 | 2 | 29.140 | F | 0.500 | 0.539  |
| SN53 | 2005 | 219 | 15 | 2 | 24.236 | F | 0.500 | -0.818 |
| SN42 | 2005 | 219 | 15 | 2 | 23.286 | F | 0.500 | -0.670 |
| ORV  | 2005 | 219 | 15 | 2 | 23.243 | F | 0.500 | -0.297 |
| SVD  | 2005 | 219 | 15 | 2 | 25.699 | F | 0.500 | -0.041 |
| BCC  | 2005 | 219 | 15 | 2 | 21.759 | F | 0.500 | 0.343  |
| EDW2 | 2005 | 219 | 15 | 2 | 21.840 | F | 0.500 | -0.839 |
| SN71 | 2005 | 219 | 15 | 2 | 19.011 | F | 0.500 | -0.777 |
| CAP  | 2005 | 219 | 15 | 2 | 21.017 | F | 0.500 | 0.082  |
| SN74 | 2005 | 219 | 15 | 2 | 24.956 | F | 0.500 | -0.837 |
| SN63 | 2005 | 219 | 15 | 2 | 24.631 | F | 0.500 | -0.771 |
| SN73 | 2005 | 219 | 15 | 2 | 22.286 | F | 0.500 | -1.169 |
| SN52 | 2005 | 219 | 15 | 2 | 22.461 | F | 0.500 | -0.254 |
| T06C | 2005 | 219 | 15 | 2 | 20.370 | F | 0.500 | -1.185 |
| SN11 | 2005 | 219 | 15 | 2 | 21.186 | F | 0.500 | -1.370 |
| CVS  | 2005 | 219 | 15 | 2 | 7.724  | F | 0.500 | -1.472 |

|      |      |     |    |   |        |   |       |        |
|------|------|-----|----|---|--------|---|-------|--------|
| TPH  | 2005 | 219 | 15 | 2 | 45.269 | F | 0.500 | -1.371 |
| SBC  | 2005 | 219 | 15 | 2 | 6.819  | F | 0.500 | 0.463  |
| V05C | 2005 | 219 | 15 | 2 | 14.957 | F | 0.500 | 1.714  |
| USC  | 2005 | 219 | 15 | 2 | 16.865 | F | 0.500 | 1.596  |
| ADO  | 2005 | 219 | 15 | 2 | 24.138 | F | 0.500 | -1.405 |
| BAK  | 2005 | 219 | 15 | 2 | 17.204 | F | 0.500 | 0.857  |
| ELFS | 2005 | 219 | 15 | 2 | 35.690 | F | 0.500 | -0.112 |
| MPP  | 2005 | 219 | 15 | 2 | 8.888  | F | 0.500 | 0.317  |

|      |     |   |    |         |          |            |         |    |       |
|------|-----|---|----|---------|----------|------------|---------|----|-------|
| 2005 | 233 | 9 | 49 | 55.6874 | -3.99900 | -104.02500 | 10.0000 | 11 | 5.607 |
|------|-----|---|----|---------|----------|------------|---------|----|-------|

|      |      |     |    |   |        |   |       |        |
|------|------|-----|----|---|--------|---|-------|--------|
| CWC  | 2005 | 233 | 10 | 4 | 13.055 | F | 0.500 | 1.663  |
| SN76 | 2005 | 233 | 10 | 4 | 45.293 | F | 0.500 | 1.462  |
| SN56 | 2005 | 233 | 10 | 4 | 37.694 | F | 0.500 | 0.318  |
| LAVA | 2005 | 233 | 10 | 4 | 55.101 | F | 0.500 | 0.858  |
| R05C | 2005 | 233 | 10 | 4 | 51.946 | F | 0.500 | 0.856  |
| P05C | 2005 | 233 | 10 | 5 | 1.694  | F | 0.500 | 0.756  |
| R06C | 2005 | 233 | 10 | 4 | 47.735 | F | 0.500 | 1.999  |
| SN86 | 2005 | 233 | 10 | 4 | 48.118 | F | 0.500 | 1.047  |
| SN95 | 2005 | 233 | 10 | 4 | 46.759 | F | 0.500 | 0.010  |
| CMB  | 2005 | 233 | 10 | 4 | 43.194 | F | 0.500 | -0.015 |
| ARV  | 2005 | 233 | 10 | 3 | 56.141 | F | 0.500 | -0.302 |
| DBO  | 2005 | 233 | 10 | 6 | 1.050  | F | 0.500 | -0.514 |
| PACP | 2005 | 233 | 10 | 4 | 33.484 | F | 0.500 | -0.306 |
| V04C | 2005 | 233 | 10 | 4 | 12.468 | F | 0.500 | -1.162 |
| ADO  | 2005 | 233 | 10 | 3 | 43.150 | F | 0.500 | 0.795  |
| BNLO | 2005 | 233 | 10 | 4 | 39.518 | F | 0.500 | -0.584 |
| V05C | 2005 | 233 | 10 | 4 | 13.162 | F | 0.500 | 1.347  |
| MLAC | 2005 | 233 | 10 | 4 | 31.021 | F | 0.500 | 0.111  |
| HATC | 2005 | 233 | 10 | 5 | 24.431 | F | 0.500 | 0.084  |
| DEC  | 2005 | 233 | 10 | 3 | 42.431 | F | 0.500 | 0.195  |
| WENL | 2005 | 233 | 10 | 4 | 44.728 | F | 0.500 | 0.824  |
| O03C | 2005 | 233 | 10 | 5 | 16.898 | F | 0.500 | 0.613  |
| VTV  | 2005 | 233 | 10 | 3 | 42.369 | F | 0.500 | 0.164  |
| RCT  | 2005 | 233 | 10 | 4 | 13.665 | F | 0.500 | -0.902 |
| S04C | 2005 | 233 | 10 | 4 | 40.930 | F | 0.500 | 0.579  |
| PHL  | 2005 | 233 | 10 | 4 | 11.727 | F | 0.500 | 2.805  |
| U04C | 2005 | 233 | 10 | 4 | 23.544 | F | 0.500 | 0.867  |
| TOV  | 2005 | 233 | 10 | 3 | 43.201 | F | 0.500 | -0.036 |
| EDW2 | 2005 | 233 | 10 | 3 | 49.893 | F | 0.500 | 0.352  |
| SN28 | 2005 | 233 | 10 | 4 | 32.479 | F | 0.500 | 0.744  |
| RRX  | 2005 | 233 | 10 | 3 | 44.844 | F | 0.500 | -0.247 |
| SLA  | 2005 | 233 | 10 | 4 | 1.788  | F | 0.500 | 1.449  |
| MWC  | 2005 | 233 | 10 | 3 | 40.841 | F | 0.500 | -0.013 |
| TIN  | 2005 | 233 | 10 | 4 | 21.363 | F | 0.500 | 1.036  |
| SN85 | 2005 | 233 | 10 | 4 | 45.503 | F | 0.500 | 0.682  |
| OSI  | 2005 | 233 | 10 | 3 | 49.224 | F | 0.500 | 0.159  |
| GSC  | 2005 | 233 | 10 | 3 | 52.170 | F | 0.500 | 1.850  |
| SN46 | 2005 | 233 | 10 | 4 | 34.177 | F | 0.500 | 0.712  |
| N02C | 2005 | 233 | 10 | 5 | 33.076 | F | 0.500 | 0.046  |
| SUTB | 2005 | 233 | 10 | 5 | 4.838  | F | 0.500 | -0.180 |
| M03C | 2005 | 233 | 10 | 5 | 31.356 | F | 0.500 | -1.868 |
| SN21 | 2005 | 233 | 10 | 4 | 19.960 | F | 0.500 | -2.590 |
| CHF  | 2005 | 233 | 10 | 3 | 42.662 | F | 0.500 | 0.516  |
| SN27 | 2005 | 233 | 10 | 4 | 30.645 | F | 0.500 | 1.434  |
| LRL  | 2005 | 233 | 10 | 3 | 56.408 | F | 0.500 | 0.008  |
| SN38 | 2005 | 233 | 10 | 4 | 35.535 | F | 0.500 | 0.936  |
| SN48 | 2005 | 233 | 10 | 4 | 37.748 | F | 0.500 | 0.687  |
| SN16 | 2005 | 233 | 10 | 4 | 25.518 | F | 0.500 | 0.870  |
| M04C | 2005 | 233 | 10 | 5 | 38.305 | F | 0.500 | -0.479 |
| BFS  | 2005 | 233 | 10 | 3 | 39.937 | F | 0.500 | 0.674  |
| SN42 | 2005 | 233 | 10 | 4 | 26.630 | F | 0.500 | -2.417 |
| SN26 | 2005 | 233 | 10 | 4 | 28.958 | F | 0.500 | 0.246  |
| S05C | 2005 | 233 | 10 | 4 | 32.161 | F | 0.500 | -1.258 |

|      |      |     |    |   |        |   |       |        |
|------|------|-----|----|---|--------|---|-------|--------|
| M02C | 2005 | 233 | 10 | 5 | 37.297 | F | 0.500 | -0.850 |
| PIN  | 2005 | 233 | 10 | 6 | 0.754  | F | 0.500 | -0.349 |
| HEC  | 2005 | 233 | 10 | 3 | 42.137 | F | 0.500 | 0.295  |
| R04C | 2005 | 233 | 10 | 4 | 49.178 | F | 0.500 | 0.801  |
| SN47 | 2005 | 233 | 10 | 4 | 35.916 | F | 0.500 | 0.663  |
| VCS  | 2005 | 233 | 10 | 3 | 44.910 | F | 0.500 | 0.125  |
| SN25 | 2005 | 233 | 10 | 4 | 27.631 | F | 0.500 | 0.762  |
| SN53 | 2005 | 233 | 10 | 4 | 31.512 | F | 0.500 | -1.498 |
| WDC  | 2005 | 233 | 10 | 5 | 23.978 | F | 0.500 | -2.092 |
| SN57 | 2005 | 233 | 10 | 4 | 39.224 | F | 0.500 | 0.629  |
| SN52 | 2005 | 233 | 10 | 4 | 29.344 | F | 0.500 | -1.773 |
| SN45 | 2005 | 233 | 10 | 4 | 32.737 | F | 0.500 | -0.306 |
| KCC  | 2005 | 233 | 10 | 4 | 26.865 | F | 0.500 | -1.871 |
| SN44 | 2005 | 233 | 10 | 4 | 29.876 | F | 0.500 | -1.398 |
| SN15 | 2005 | 233 | 10 | 4 | 25.628 | F | 0.500 | 0.126  |
| T06C | 2005 | 233 | 10 | 4 | 23.351 | F | 0.500 | -2.629 |
| SN12 | 2005 | 233 | 10 | 4 | 21.019 | F | 0.500 | -0.968 |
| SN37 | 2005 | 233 | 10 | 4 | 32.485 | F | 0.500 | 0.232  |
| SN22 | 2005 | 233 | 10 | 4 | 22.420 | F | 0.500 | -2.302 |
| SN11 | 2005 | 233 | 10 | 4 | 18.194 | F | 0.500 | -1.804 |
| HUMO | 2005 | 233 | 10 | 5 | 52.048 | F | 0.500 | -1.683 |
| GRA  | 2005 | 233 | 10 | 4 | 17.138 | F | 0.500 | 1.263  |
| SN51 | 2005 | 233 | 10 | 4 | 29.256 | F | 0.500 | -1.913 |
| SN84 | 2005 | 233 | 10 | 4 | 43.627 | F | 0.500 | -0.190 |
| SN43 | 2005 | 233 | 10 | 4 | 29.455 | F | 0.500 | -1.603 |
| O04C | 2005 | 233 | 10 | 5 | 17.310 | F | 0.500 | 0.950  |
| YBH  | 2005 | 233 | 10 | 5 | 40.086 | F | 0.500 | -1.710 |
| SN74 | 2005 | 233 | 10 | 4 | 39.985 | F | 0.500 | -0.660 |
| R07C | 2005 | 233 | 10 | 4 | 39.177 | F | 0.500 | 1.111  |
| M06C | 2005 | 233 | 10 | 5 | 25.834 | F | 0.500 | 0.553  |
| SN36 | 2005 | 233 | 10 | 4 | 31.441 | F | 0.500 | 0.347  |
| S08C | 2005 | 233 | 10 | 4 | 27.658 | F | 0.500 | 1.027  |
| MPM  | 2005 | 233 | 10 | 4 | 4.756  | F | 0.500 | 0.896  |
| SN23 | 2005 | 233 | 10 | 4 | 24.246 | F | 0.500 | -1.567 |
| SN24 | 2005 | 233 | 10 | 4 | 26.159 | F | 0.500 | -0.740 |
| SN71 | 2005 | 233 | 10 | 4 | 37.250 | F | 0.500 | -0.655 |
| SN67 | 2005 | 233 | 10 | 4 | 42.769 | F | 0.500 | 1.445  |
| SN73 | 2005 | 233 | 10 | 4 | 38.177 | F | 0.500 | -0.964 |
| SHO  | 2005 | 233 | 10 | 3 | 57.702 | F | 0.500 | 1.415  |
| SN66 | 2005 | 233 | 10 | 4 | 41.909 | F | 0.500 | 1.156  |
| ORV  | 2005 | 233 | 10 | 5 | 8.957  | F | 0.500 | 1.038  |
| MOD  | 2005 | 233 | 10 | 5 | 34.040 | F | 0.500 | 0.335  |
| SN62 | 2005 | 233 | 10 | 4 | 34.249 | F | 0.500 | -1.064 |
| WVOR | 2005 | 233 | 10 | 5 | 34.443 | F | 0.500 | -0.127 |
| SN63 | 2005 | 233 | 10 | 4 | 35.257 | F | 0.500 | -1.340 |

|      |      |     |    |        |          |           |          |        |       |
|------|------|-----|----|--------|----------|-----------|----------|--------|-------|
| 2005 | 264  | 2   | 25 | 8.1306 | 43.89200 | 146.14500 | 103.0000 | 12     | 0.021 |
| SN57 | 2005 | 264 | 2  | 44     | 47.163   | F         | 0.500    | 0.749  |       |
| R04C | 2005 | 264 | 2  | 44     | 30.303   | F         | 0.500    | -0.219 |       |
| FMP  | 2005 | 264 | 2  | 45     | 23.343   | F         | 0.500    | -0.798 |       |
| SN71 | 2005 | 264 | 2  | 44     | 38.644   | F         | 0.500    | -0.614 |       |
| M06C | 2005 | 264 | 2  | 44     | 13.131   | F         | 0.500    | 0.672  |       |
| WDC  | 2005 | 264 | 2  | 44     | 2.483    | F         | 0.500    | 1.218  |       |
| SN21 | 2005 | 264 | 2  | 44     | 50.444   | F         | 0.500    | -1.676 |       |
| SN85 | 2005 | 264 | 2  | 44     | 38.515   | F         | 0.500    | 0.192  |       |
| PLM  | 2005 | 264 | 2  | 45     | 36.925   | F         | 0.500    | -0.905 |       |
| VCS  | 2005 | 264 | 2  | 45     | 19.325   | F         | 0.500    | -0.704 |       |
| LRL  | 2005 | 264 | 2  | 45     | 14.351   | F         | 0.500    | -1.417 |       |
| SN54 | 2005 | 264 | 2  | 44     | 45.786   | F         | 0.500    | 0.037  |       |
| DGR  | 2005 | 264 | 2  | 45     | 32.727   | F         | 0.500    | -1.408 |       |
| Q04C | 2005 | 264 | 2  | 44     | 24.250   | F         | 0.500    | 1.335  |       |
| MOD  | 2005 | 264 | 2  | 44     | 9.214    | F         | 0.500    | 0.604  |       |
| TOV  | 2005 | 264 | 2  | 45     | 15.639   | F         | 0.500    | -1.541 |       |

|      |      |     |   |    |        |   |       |        |
|------|------|-----|---|----|--------|---|-------|--------|
| MNV  | 2005 | 264 | 2 | 44 | 50.282 | F | 0.500 | 0.134  |
| SLA  | 2005 | 264 | 2 | 45 | 14.401 | F | 0.500 | -1.155 |
| SN36 | 2005 | 264 | 2 | 44 | 53.859 | F | 0.500 | 1.551  |
| TIN  | 2005 | 264 | 2 | 45 | 0.279  | F | 0.500 | 0.230  |
| SN24 | 2005 | 264 | 2 | 44 | 53.572 | F | 0.500 | 0.524  |
| SN74 | 2005 | 264 | 2 | 44 | 40.224 | F | 0.500 | -0.333 |
| PAS  | 2005 | 264 | 2 | 45 | 20.077 | F | 0.500 | -1.963 |
| R07C | 2005 | 264 | 2 | 44 | 47.138 | F | 0.500 | 0.651  |
| SN86 | 2005 | 264 | 2 | 44 | 37.836 | F | 0.500 | -0.171 |
| WVOR | 2005 | 264 | 2 | 44 | 17.067 | F | 0.500 | 0.616  |
| M03C | 2005 | 264 | 2 | 44 | 0.296  | F | 0.500 | 0.693  |
| GSC  | 2005 | 264 | 2 | 45 | 22.071 | F | 0.500 | -1.205 |
| ISA  | 2005 | 264 | 2 | 45 | 5.530  | F | 0.500 | -2.830 |
| SN46 | 2005 | 264 | 2 | 44 | 51.197 | F | 0.500 | 1.268  |
| M05C | 2005 | 264 | 2 | 44 | 7.214  | F | 0.500 | 0.908  |
| SN48 | 2005 | 264 | 2 | 44 | 50.137 | F | 0.500 | 0.754  |
| R06C | 2005 | 264 | 2 | 44 | 40.423 | F | 0.500 | 0.262  |
| CWC  | 2005 | 264 | 2 | 45 | 4.900  | F | 0.500 | -0.900 |
| RRX  | 2005 | 264 | 2 | 45 | 24.490 | F | 0.500 | -0.476 |
| PIN  | 2005 | 264 | 2 | 43 | 53.294 | F | 0.500 | 2.954  |
| S05C | 2005 | 264 | 2 | 44 | 41.303 | F | 0.500 | -0.729 |
| KCC  | 2005 | 264 | 2 | 44 | 49.413 | F | 0.500 | -0.408 |
| DBO  | 2005 | 264 | 2 | 43 | 39.475 | F | 0.500 | 1.776  |
| SN44 | 2005 | 264 | 2 | 44 | 49.020 | F | 0.500 | -0.041 |
| M02C | 2005 | 264 | 2 | 43 | 55.292 | F | 0.500 | 2.223  |
| SN12 | 2005 | 264 | 2 | 44 | 54.069 | F | 0.500 | -1.094 |
| O05C | 2005 | 264 | 2 | 44 | 17.778 | F | 0.500 | -0.402 |
| SN15 | 2005 | 264 | 2 | 44 | 56.608 | F | 0.500 | 0.777  |
| SN45 | 2005 | 264 | 2 | 44 | 49.736 | F | 0.500 | 0.521  |
| SN43 | 2005 | 264 | 2 | 44 | 47.970 | F | 0.500 | -0.449 |
| SN47 | 2005 | 264 | 2 | 44 | 50.823 | F | 0.500 | 1.209  |
| HELL | 2005 | 264 | 2 | 44 | 55.698 | F | 0.500 | -1.244 |
| SN37 | 2005 | 264 | 2 | 44 | 53.588 | F | 0.500 | 1.466  |
| SN67 | 2005 | 264 | 2 | 44 | 44.393 | F | 0.500 | 0.049  |
| SN42 | 2005 | 264 | 2 | 44 | 48.283 | F | 0.500 | -0.123 |
| R05C | 2005 | 264 | 2 | 44 | 34.032 | F | 0.500 | -0.222 |
| SN66 | 2005 | 264 | 2 | 44 | 43.752 | F | 0.500 | -0.046 |
| SN16 | 2005 | 264 | 2 | 44 | 58.512 | F | 0.500 | 0.820  |
| SN64 | 2005 | 264 | 2 | 44 | 43.925 | F | 0.500 | 0.072  |
| P05C | 2005 | 264 | 2 | 44 | 25.053 | F | 0.500 | -0.658 |
| SN56 | 2005 | 264 | 2 | 44 | 47.010 | F | 0.500 | 0.306  |
| SN27 | 2005 | 264 | 2 | 44 | 55.978 | F | 0.500 | 1.419  |
| EDW2 | 2005 | 264 | 2 | 45 | 17.073 | F | 0.500 | -0.630 |
| T06C | 2005 | 264 | 2 | 44 | 48.204 | F | 0.500 | -0.997 |
| SN23 | 2005 | 264 | 2 | 44 | 51.933 | F | 0.500 | -0.525 |
| SN73 | 2005 | 264 | 2 | 44 | 39.963 | F | 0.500 | -0.355 |
| SN22 | 2005 | 264 | 2 | 44 | 51.244 | F | 0.500 | -0.779 |
| SN38 | 2005 | 264 | 2 | 44 | 52.666 | F | 0.500 | 0.962  |
| SN28 | 2005 | 264 | 2 | 44 | 55.500 | F | 0.500 | 1.426  |
| SN11 | 2005 | 264 | 2 | 44 | 52.769 | F | 0.500 | -1.536 |
| ORV  | 2005 | 264 | 2 | 44 | 15.915 | F | 0.500 | -0.928 |
| SN51 | 2005 | 264 | 2 | 44 | 44.094 | F | 0.500 | -0.573 |
| SN95 | 2005 | 264 | 2 | 44 | 35.846 | F | 0.500 | 0.344  |
| S08C | 2005 | 264 | 2 | 44 | 58.397 | F | 0.500 | 0.955  |
| LAVA | 2005 | 264 | 2 | 44 | 28.377 | F | 0.500 | -0.243 |
| SN75 | 2005 | 264 | 2 | 44 | 41.484 | F | 0.500 | -0.077 |
| SN25 | 2005 | 264 | 2 | 44 | 55.231 | F | 0.500 | 0.702  |

|      |     |   |    |         |          |           |          |
|------|-----|---|----|---------|----------|-----------|----------|
| 2005 | 269 | 1 | 55 | 38.9444 | -5.67800 | -76.39800 | 115.0000 |
|------|-----|---|----|---------|----------|-----------|----------|

13

1.274

|      |      |     |   |    |        |   |       |        |
|------|------|-----|---|----|--------|---|-------|--------|
| SN86 | 2005 | 269 | 2 | 13 | 33.207 | F | 0.500 | 0.428  |
| V05C | 2005 | 269 | 2 | 13 | 11.342 | F | 0.500 | -1.384 |
| WVOR | 2005 | 269 | 2 | 13 | 53.921 | F | 0.500 | -1.015 |
| MOD  | 2005 | 269 | 2 | 14 | 0.903  | F | 0.500 | -1.806 |

|      |      |     |   |    |        |   |       |        |
|------|------|-----|---|----|--------|---|-------|--------|
| Q03C | 2005 | 269 | 2 | 13 | 53.129 | F | 0.500 | 2.206  |
| T05C | 2005 | 269 | 2 | 13 | 26.486 | F | 0.500 | -0.410 |
| MNRC | 2005 | 269 | 2 | 13 | 57.870 | F | 0.500 | 1.721  |
| O03C | 2005 | 269 | 2 | 14 | 1.445  | F | 0.500 | 0.373  |
| M02C | 2005 | 269 | 2 | 14 | 14.693 | F | 0.500 | -3.247 |
| DBO  | 2005 | 269 | 2 | 14 | 29.863 | F | 0.500 | -3.323 |
| GASB | 2005 | 269 | 2 | 14 | 8.014  | F | 0.500 | 3.807  |
| HATC | 2005 | 269 | 2 | 14 | 1.279  | F | 0.500 | -1.758 |
| U04C | 2005 | 269 | 2 | 13 | 22.119 | F | 0.500 | -1.780 |
| MPP  | 2005 | 269 | 2 | 13 | 3.514  | F | 0.500 | -1.201 |
| SN21 | 2005 | 269 | 2 | 13 | 13.924 | F | 0.500 | -2.627 |
| BAK  | 2005 | 269 | 2 | 13 | 1.529  | F | 0.500 | -0.284 |
| SBC  | 2005 | 269 | 2 | 12 | 58.923 | F | 0.500 | -1.119 |
| PACP | 2005 | 269 | 2 | 13 | 31.590 | F | 0.500 | -1.467 |
| S05C | 2005 | 269 | 2 | 13 | 25.783 | F | 0.500 | -1.664 |
| SUTB | 2005 | 269 | 2 | 13 | 53.339 | F | 0.500 | -0.143 |
| O04C | 2005 | 269 | 2 | 13 | 56.541 | F | 0.500 | 0.068  |
| VCS  | 2005 | 269 | 2 | 12 | 46.611 | F | 0.500 | -0.038 |
| M05C | 2005 | 269 | 2 | 14 | 3.204  | F | 0.500 | -1.549 |
| M04C | 2005 | 269 | 2 | 14 | 12.127 | F | 0.500 | -1.089 |
| SN42 | 2005 | 269 | 2 | 13 | 19.396 | F | 0.500 | -1.378 |
| PKD  | 2005 | 269 | 2 | 13 | 21.621 | F | 0.500 | 2.862  |
| T06C | 2005 | 269 | 2 | 13 | 17.300 | F | 0.500 | -2.438 |
| S04C | 2005 | 269 | 2 | 13 | 37.395 | F | 0.500 | 0.525  |
| V03C | 2005 | 269 | 2 | 13 | 24.903 | F | 0.500 | -0.353 |
| OSI  | 2005 | 269 | 2 | 12 | 53.112 | F | 0.500 | 0.250  |
| SN52 | 2005 | 269 | 2 | 13 | 21.634 | F | 0.500 | -1.630 |
| ELFS | 2005 | 269 | 2 | 13 | 55.807 | F | 0.500 | -0.325 |
| TOV  | 2005 | 269 | 2 | 12 | 49.962 | F | 0.500 | -0.063 |
| DEC  | 2005 | 269 | 2 | 12 | 47.162 | F | 0.500 | 0.595  |
| USC  | 2005 | 269 | 2 | 12 | 44.487 | F | 0.500 | 0.212  |
| PHL  | 2005 | 269 | 2 | 13 | 17.645 | F | 0.500 | 2.859  |
| HUMO | 2005 | 269 | 2 | 14 | 24.046 | F | 0.500 | -3.342 |
| LGU  | 2005 | 269 | 2 | 12 | 53.749 | F | 0.500 | 1.915  |
| M06C | 2005 | 269 | 2 | 13 | 57.977 | F | 0.500 | -0.529 |
| SN64 | 2005 | 269 | 2 | 13 | 29.704 | F | 0.500 | 3.261  |
| ARV  | 2005 | 269 | 2 | 12 | 56.518 | F | 0.500 | -1.081 |
| SDP  | 2005 | 269 | 2 | 13 | 6.925  | F | 0.500 | -1.125 |
| SAO  | 2005 | 269 | 2 | 13 | 33.699 | F | 0.500 | 1.144  |
| RCT  | 2005 | 269 | 2 | 13 | 9.645  | F | 0.500 | -0.784 |
| SCZ2 | 2005 | 269 | 2 | 12 | 53.462 | F | 0.500 | -2.582 |
| CHF  | 2005 | 269 | 2 | 12 | 45.510 | F | 0.500 | 0.838  |
| RPV  | 2005 | 269 | 2 | 12 | 42.947 | F | 0.500 | -0.156 |
| SN22 | 2005 | 269 | 2 | 13 | 15.004 | F | 0.500 | -2.103 |
| ADO  | 2005 | 269 | 2 | 12 | 41.378 | F | 0.500 | 0.227  |
| SN53 | 2005 | 269 | 2 | 13 | 22.528 | F | 0.500 | -1.140 |
| SN11 | 2005 | 269 | 2 | 13 | 12.159 | F | 0.500 | -1.812 |
| JRSC | 2005 | 269 | 2 | 13 | 44.568 | F | 0.500 | 0.906  |
| SN51 | 2005 | 269 | 2 | 13 | 22.585 | F | 0.500 | -2.034 |
| MWC  | 2005 | 269 | 2 | 12 | 45.215 | F | 0.500 | 1.098  |
| YBH  | 2005 | 269 | 2 | 14 | 16.220 | F | 0.500 | -3.089 |
| CIA  | 2005 | 269 | 2 | 12 | 40.605 | F | 0.500 | 0.032  |
| M03C | 2005 | 269 | 2 | 14 | 9.267  | F | 0.500 | -2.207 |
| SDD  | 2005 | 269 | 2 | 12 | 34.753 | F | 0.500 | -0.300 |
| SN43 | 2005 | 269 | 2 | 13 | 20.036 | F | 0.500 | -1.528 |
| FMP  | 2005 | 269 | 2 | 12 | 43.076 | F | 0.500 | 1.109  |
| GRA  | 2005 | 269 | 2 | 13 | 1.285  | F | 0.500 | 0.740  |
| SN62 | 2005 | 269 | 2 | 13 | 25.794 | F | 0.500 | -1.010 |
| DJJ  | 2005 | 269 | 2 | 12 | 47.058 | F | 0.500 | 0.528  |
| ORV  | 2005 | 269 | 2 | 13 | 54.085 | F | 0.500 | 0.586  |
| SN12 | 2005 | 269 | 2 | 13 | 12.394 | F | 0.500 | -1.275 |
| O05C | 2005 | 269 | 2 | 13 | 52.804 | F | 0.500 | 0.483  |
| KCC  | 2005 | 269 | 2 | 13 | 18.080 | F | 0.500 | -1.195 |

|      |      |     |   |    |        |   |       |        |
|------|------|-----|---|----|--------|---|-------|--------|
| BBR  | 2005 | 269 | 2 | 12 | 35.031 | F | 0.500 | 0.451  |
| SN15 | 2005 | 269 | 2 | 13 | 14.005 | F | 0.500 | 0.696  |
| SN95 | 2005 | 269 | 2 | 13 | 35.071 | F | 0.500 | 0.134  |
| PLM  | 2005 | 269 | 2 | 12 | 26.715 | F | 0.500 | 0.026  |
| JCS  | 2005 | 269 | 2 | 12 | 22.452 | F | 0.500 | 0.550  |
| SN71 | 2005 | 269 | 2 | 13 | 29.314 | F | 0.500 | -1.052 |
| PIN  | 2005 | 269 | 2 | 14 | 24.043 | F | 0.500 | 2.228  |
| BFS  | 2005 | 269 | 2 | 12 | 41.199 | F | 0.500 | 0.400  |
| Q04C | 2005 | 269 | 2 | 13 | 47.616 | F | 0.500 | 0.310  |
| PAS  | 2005 | 269 | 2 | 12 | 44.703 | F | 0.500 | 0.444  |
| SN54 | 2005 | 269 | 2 | 13 | 23.652 | F | 0.500 | -0.538 |
| SN67 | 2005 | 269 | 2 | 13 | 26.554 | F | 0.500 | 0.809  |
| SN63 | 2005 | 269 | 2 | 13 | 25.732 | F | 0.500 | -0.840 |
| HAST | 2005 | 269 | 2 | 13 | 31.357 | F | 0.500 | 0.657  |
| DGR  | 2005 | 269 | 2 | 12 | 31.831 | F | 0.500 | 1.618  |
| RRX  | 2005 | 269 | 2 | 12 | 40.186 | F | 0.500 | 0.143  |
| VTV  | 2005 | 269 | 2 | 12 | 40.861 | F | 0.500 | 0.434  |
| CWC  | 2005 | 269 | 2 | 13 | 2.584  | F | 0.500 | 0.508  |
| SN23 | 2005 | 269 | 2 | 13 | 15.544 | F | 0.500 | -1.474 |
| SN57 | 2005 | 269 | 2 | 13 | 24.498 | F | 0.500 | 1.377  |
| SVD  | 2005 | 269 | 2 | 12 | 34.544 | F | 0.500 | 0.015  |
| SN44 | 2005 | 269 | 2 | 13 | 19.652 | F | 0.500 | -0.922 |
| R04C | 2005 | 269 | 2 | 13 | 39.732 | F | 0.500 | 0.418  |
| SNCC | 2005 | 269 | 2 | 12 | 48.766 | F | 0.500 | -0.491 |
| V04C | 2005 | 269 | 2 | 13 | 18.799 | F | 0.500 | -0.536 |
| SN47 | 2005 | 269 | 2 | 13 | 21.191 | F | 0.500 | 1.444  |
| SN25 | 2005 | 269 | 2 | 13 | 16.511 | F | 0.500 | 1.783  |
| EDW2 | 2005 | 269 | 2 | 12 | 47.625 | F | 0.500 | -1.096 |
| SN48 | 2005 | 269 | 2 | 13 | 21.155 | F | 0.500 | 1.297  |
| SN84 | 2005 | 269 | 2 | 13 | 32.299 | F | 0.500 | -0.315 |
| SN24 | 2005 | 269 | 2 | 13 | 15.810 | F | 0.500 | -0.516 |
| SN73 | 2005 | 269 | 2 | 13 | 28.687 | F | 0.500 | -0.964 |
| MLAC | 2005 | 269 | 2 | 13 | 18.896 | F | 0.500 | 1.010  |
| SN37 | 2005 | 269 | 2 | 13 | 18.407 | F | 0.500 | 1.471  |
| SN46 | 2005 | 269 | 2 | 13 | 21.051 | F | 0.500 | 1.205  |
| SN74 | 2005 | 269 | 2 | 13 | 29.093 | F | 0.500 | -0.418 |
| SN85 | 2005 | 269 | 2 | 13 | 32.253 | F | 0.500 | 0.084  |
| VES  | 2005 | 269 | 2 | 13 | 6.807  | F | 0.500 | 1.388  |
| SN27 | 2005 | 269 | 2 | 13 | 15.231 | F | 0.500 | 1.022  |
| P05C | 2005 | 269 | 2 | 13 | 45.025 | F | 0.500 | 0.018  |
| SMM  | 2005 | 269 | 2 | 13 | 8.848  | F | 0.500 | -0.469 |
| MPM  | 2005 | 269 | 2 | 12 | 55.114 | F | 0.500 | 0.972  |
| TIN  | 2005 | 269 | 2 | 13 | 9.941  | F | 0.500 | 1.881  |
| SN16 | 2005 | 269 | 2 | 13 | 11.945 | F | 0.500 | 1.037  |
| SN14 | 2005 | 269 | 2 | 13 | 13.621 | F | 0.500 | -0.230 |
| HELL | 2005 | 269 | 2 | 13 | 11.211 | F | 0.500 | -0.446 |
| HEC  | 2005 | 269 | 2 | 12 | 33.315 | F | 0.500 | -0.701 |
| SN65 | 2005 | 269 | 2 | 13 | 25.669 | F | 0.500 | -0.894 |
| SLA  | 2005 | 269 | 2 | 12 | 52.776 | F | 0.500 | 1.951  |
| SN36 | 2005 | 269 | 2 | 13 | 17.994 | F | 0.500 | 1.002  |
| SN34 | 2005 | 269 | 2 | 13 | 17.676 | F | 0.500 | -0.196 |
| SN55 | 2005 | 269 | 2 | 13 | 23.633 | F | 0.500 | -0.502 |
| SN26 | 2005 | 269 | 2 | 13 | 15.763 | F | 0.500 | 1.157  |
| SN56 | 2005 | 269 | 2 | 13 | 24.318 | F | 0.500 | 0.750  |
| S08C | 2005 | 269 | 2 | 13 | 13.024 | F | 0.500 | 1.319  |
| SN28 | 2005 | 269 | 2 | 13 | 15.446 | F | 0.500 | 0.864  |
| R06C | 2005 | 269 | 2 | 13 | 31.015 | F | 0.500 | 1.111  |
| R07C | 2005 | 269 | 2 | 13 | 24.604 | F | 0.500 | 1.444  |
| MNV  | 2005 | 269 | 2 | 13 | 19.740 | F | 0.500 | 0.985  |
| R05C | 2005 | 269 | 2 | 13 | 36.731 | F | 0.500 | 0.189  |
| LRL  | 2005 | 269 | 2 | 12 | 51.607 | F | 0.500 | 0.714  |
| SN66 | 2005 | 269 | 2 | 13 | 27.580 | F | 0.500 | 1.120  |
| FUR  | 2005 | 269 | 2 | 12 | 52.633 | F | 0.500 | 0.813  |

|      |      |     |   |    |        |   |       |        |
|------|------|-----|---|----|--------|---|-------|--------|
| SN38 | 2005 | 269 | 2 | 13 | 18.014 | F | 0.500 | 0.720  |
| CMB  | 2005 | 269 | 2 | 13 | 33.343 | F | 0.500 | -0.098 |
| LAVA | 2005 | 269 | 2 | 13 | 42.007 | F | 0.500 | 0.280  |
| ISA  | 2005 | 269 | 2 | 12 | 58.831 | F | 0.500 | -0.271 |
| SHO  | 2005 | 269 | 2 | 12 | 43.173 | F | 0.500 | 0.940  |
| SN45 | 2005 | 269 | 2 | 13 | 21.056 | F | 0.500 | 0.535  |
| GSC  | 2005 | 269 | 2 | 12 | 42.945 | F | 0.500 | 0.948  |
| SN75 | 2005 | 269 | 2 | 13 | 29.317 | F | 0.500 | 0.311  |
| BDM  | 2005 | 269 | 2 | 13 | 45.345 | F | 0.500 | 0.603  |

|      |     |    |   |         |          |           |         |    |       |
|------|-----|----|---|---------|----------|-----------|---------|----|-------|
| 2005 | 288 | 10 | 6 | 19.2963 | 46.81600 | 154.11301 | 42.8000 | 14 | 2.286 |
|------|-----|----|---|---------|----------|-----------|---------|----|-------|

|      |      |     |    |    |        |   |       |        |
|------|------|-----|----|----|--------|---|-------|--------|
| SN76 | 2005 | 288 | 10 | 24 | 46.191 | F | 0.500 | 0.696  |
| FARB | 2005 | 288 | 10 | 24 | 22.354 | F | 0.500 | 0.164  |
| ELFS | 2005 | 288 | 10 | 24 | 18.754 | F | 0.500 | 0.933  |
| MNRC | 2005 | 288 | 10 | 24 | 20.934 | F | 0.500 | 3.141  |
| SN45 | 2005 | 288 | 10 | 24 | 55.313 | F | 0.500 | 1.077  |
| SUTB | 2005 | 288 | 10 | 24 | 20.233 | F | 0.500 | 0.154  |
| GSC  | 2005 | 288 | 10 | 25 | 29.565 | F | 0.500 | -0.915 |
| S04C | 2005 | 288 | 10 | 24 | 37.783 | F | 0.500 | 0.311  |
| ISA  | 2005 | 288 | 10 | 25 | 12.369 | F | 0.500 | -2.244 |
| SMM  | 2005 | 288 | 10 | 25 | 5.506  | F | 0.500 | -0.067 |
| SN23 | 2005 | 288 | 10 | 24 | 58.003 | F | 0.500 | 0.361  |
| M06C | 2005 | 288 | 10 | 24 | 15.682 | F | 0.500 | 0.335  |
| SN67 | 2005 | 288 | 10 | 24 | 49.923 | F | 0.500 | 0.868  |
| RPV  | 2005 | 288 | 10 | 25 | 29.752 | F | 0.500 | -0.847 |
| TOV  | 2005 | 288 | 10 | 25 | 22.888 | F | 0.500 | -1.126 |
| MWC  | 2005 | 288 | 10 | 25 | 27.866 | F | 0.500 | -1.977 |
| PAS  | 2005 | 288 | 10 | 25 | 27.697 | F | 0.500 | -1.476 |
| LRL  | 2005 | 288 | 10 | 25 | 20.966 | F | 0.500 | -1.520 |
| SN34 | 2005 | 288 | 10 | 24 | 57.497 | F | 0.500 | 0.694  |
| R04C | 2005 | 288 | 10 | 24 | 34.274 | F | 0.500 | -0.127 |
| SN43 | 2005 | 288 | 10 | 24 | 53.327 | F | 0.500 | -0.016 |
| SN16 | 2005 | 288 | 10 | 25 | 4.788  | F | 0.500 | 1.548  |
| SN46 | 2005 | 288 | 10 | 24 | 56.217 | F | 0.500 | 1.253  |
| DJJ  | 2005 | 288 | 10 | 25 | 25.985 | F | 0.500 | -1.201 |
| SN44 | 2005 | 288 | 10 | 24 | 54.386 | F | 0.500 | 0.332  |
| S08C | 2005 | 288 | 10 | 25 | 4.847  | F | 0.500 | 1.871  |
| P05C | 2005 | 288 | 10 | 24 | 29.048 | F | 0.500 | -0.222 |
| DGR  | 2005 | 288 | 10 | 25 | 40.715 | F | 0.500 | -1.375 |
| SN15 | 2005 | 288 | 10 | 25 | 2.351  | F | 0.500 | 1.095  |
| JCS  | 2005 | 288 | 10 | 25 | 49.369 | F | 0.500 | -0.727 |
| ADO  | 2005 | 288 | 10 | 25 | 30.750 | F | 0.500 | -1.102 |
| SN64 | 2005 | 288 | 10 | 24 | 48.750 | F | 0.500 | 0.257  |
| KCC  | 2005 | 288 | 10 | 24 | 55.387 | F | 0.500 | 0.505  |
| SHO  | 2005 | 288 | 10 | 25 | 29.092 | F | 0.500 | -0.641 |
| GRA  | 2005 | 288 | 10 | 25 | 12.667 | F | 0.500 | 0.161  |
| TIN  | 2005 | 288 | 10 | 25 | 5.902  | F | 0.500 | 0.172  |
| RRX  | 2005 | 288 | 10 | 25 | 32.138 | F | 0.500 | -0.152 |
| SN71 | 2005 | 288 | 10 | 24 | 43.574 | F | 0.500 | -0.053 |
| SN36 | 2005 | 288 | 10 | 24 | 59.947 | F | 0.500 | 2.404  |
| BFS  | 2005 | 288 | 10 | 25 | 31.931 | F | 0.500 | -0.660 |
| T06C | 2005 | 288 | 10 | 24 | 53.960 | F | 0.500 | -0.251 |
| SN11 | 2005 | 288 | 10 | 24 | 58.830 | F | 0.500 | -0.851 |
| R05C | 2005 | 288 | 10 | 24 | 38.533 | F | 0.500 | 0.194  |
| MPM  | 2005 | 288 | 10 | 25 | 18.753 | F | 0.500 | -0.724 |
| S05C | 2005 | 288 | 10 | 24 | 46.268 | F | 0.500 | -0.324 |
| R06C | 2005 | 288 | 10 | 24 | 44.653 | F | 0.500 | 0.038  |
| MUR  | 2005 | 288 | 10 | 25 | 39.739 | F | 0.500 | -1.300 |
| OSI  | 2005 | 288 | 10 | 25 | 20.454 | F | 0.500 | -0.765 |
| SN62 | 2005 | 288 | 10 | 24 | 47.599 | F | 0.500 | 0.145  |
| SN38 | 2005 | 288 | 10 | 24 | 58.033 | F | 0.500 | 1.121  |
| PLM  | 2005 | 288 | 10 | 25 | 45.024 | F | 0.500 | -0.964 |
| SN25 | 2005 | 288 | 10 | 25 | 1.136  | F | 0.500 | 1.276  |



|      |      |     |    |    |        |   |       |        |
|------|------|-----|----|----|--------|---|-------|--------|
| HEC  | 2005 | 288 | 10 | 25 | 37.353 | F | 0.500 | -0.559 |
| SN22 | 2005 | 288 | 10 | 24 | 56.913 | F | 0.500 | -0.288 |
| SN54 | 2005 | 288 | 10 | 24 | 51.133 | F | 0.500 | 0.622  |
| HELL | 2005 | 288 | 10 | 25 | 1.941  | F | 0.500 | -0.500 |
| SN48 | 2005 | 288 | 10 | 24 | 55.302 | F | 0.500 | 0.887  |
| RCT  | 2005 | 288 | 10 | 25 | 1.867  | F | 0.500 | -1.366 |
| SN75 | 2005 | 288 | 10 | 24 | 46.268 | F | 0.500 | 0.228  |
| SN73 | 2005 | 288 | 10 | 24 | 44.885 | F | 0.500 | 0.120  |
| EDW2 | 2005 | 288 | 10 | 25 | 23.822 | F | 0.500 | -0.759 |
| SN27 | 2005 | 288 | 10 | 25 | 2.169  | F | 0.500 | 2.239  |
| SN28 | 2005 | 288 | 10 | 25 | 0.880  | F | 0.500 | 1.434  |
| SN47 | 2005 | 288 | 10 | 24 | 55.839 | F | 0.500 | 1.202  |
| CHF  | 2005 | 288 | 10 | 25 | 28.583 | F | 0.500 | -0.447 |
| S06C | 2005 | 288 | 10 | 24 | 46.586 | F | 0.500 | 0.151  |
| LAVA | 2005 | 288 | 10 | 24 | 32.886 | F | 0.500 | 0.549  |
| BBR  | 2005 | 288 | 10 | 25 | 36.657 | F | 0.500 | -1.770 |
| CMB  | 2005 | 288 | 10 | 24 | 41.488 | F | 0.500 | 0.773  |
| SN51 | 2005 | 288 | 10 | 24 | 49.051 | F | 0.500 | -0.371 |
| SN84 | 2005 | 288 | 10 | 24 | 42.463 | F | 0.500 | 0.412  |
| SN21 | 2005 | 288 | 10 | 24 | 56.687 | F | 0.500 | -0.621 |
| VCS  | 2005 | 288 | 10 | 25 | 26.411 | F | 0.500 | -0.611 |
| VTV  | 2005 | 288 | 10 | 25 | 31.570 | F | 0.500 | -0.801 |

|      |      |     |    |         |          |           |         |        |       |
|------|------|-----|----|---------|----------|-----------|---------|--------|-------|
| 2005 | 318  | 21  | 38 | 56.1826 | 38.10700 | 144.89600 | 11.0000 | 15     | 4.763 |
| SN12 | 2005 | 318 | 21 | 59      | 47.479   | F         | 0.500   | -0.538 |       |
| GSC  | 2005 | 318 | 22 | 0       | 15.672   | F         | 0.500   | 0.668  |       |
| RRX  | 2005 | 318 | 22 | 0       | 16.973   | F         | 0.500   | 0.745  |       |
| TPH  | 2005 | 318 | 21 | 59      | 52.988   | F         | 0.500   | -1.091 |       |
| M05C | 2005 | 318 | 21 | 59      | 3.833    | F         | 0.500   | 0.570  |       |
| HEC  | 2005 | 318 | 22 | 0       | 21.392   | F         | 0.500   | -0.252 |       |
| VTV  | 2005 | 318 | 22 | 0       | 14.904   | F         | 0.500   | -1.043 |       |
| TPNV | 2005 | 318 | 22 | 0       | 8.614    | F         | 0.500   | 0.094  |       |
| FUR  | 2005 | 318 | 22 | 0       | 5.633    | F         | 0.500   | -0.932 |       |
| SDD  | 2005 | 318 | 22 | 0       | 20.324   | F         | 0.500   | 0.440  |       |
| MOD  | 2005 | 318 | 21 | 59      | 4.927    | F         | 0.500   | -1.362 |       |
| SHO  | 2005 | 318 | 22 | 0       | 16.013   | F         | 0.500   | 1.043  |       |
| WVOR | 2005 | 318 | 21 | 59      | 15.295   | F         | 0.500   | 0.415  |       |
| GRA  | 2005 | 318 | 22 | 0       | 1.186    | F         | 0.500   | 1.574  |       |
| MPP  | 2005 | 318 | 21 | 59      | 54.366   | F         | 0.500   | -0.960 |       |
| SMM  | 2005 | 318 | 21 | 59      | 49.499   | F         | 0.500   | -1.439 |       |
| MPM  | 2005 | 318 | 22 | 0       | 4.432    | F         | 0.500   | -0.883 |       |
| MNV  | 2005 | 318 | 21 | 59      | 45.345   | F         | 0.500   | 0.646  |       |
| USC  | 2005 | 318 | 22 | 0       | 12.733   | F         | 0.500   | 0.523  |       |
| SCZ2 | 2005 | 318 | 22 | 0       | 0.255    | F         | 0.500   | -1.859 |       |
| O05C | 2005 | 318 | 21 | 59      | 11.119   | F         | 0.500   | -2.633 |       |
| VES  | 2005 | 318 | 21 | 59      | 52.292   | F         | 0.500   | -2.025 |       |
| EDW2 | 2005 | 318 | 22 | 0       | 10.776   | F         | 0.500   | 1.988  |       |
| SN51 | 2005 | 318 | 21 | 59      | 37.865   | F         | 0.500   | 0.207  |       |
| BAK  | 2005 | 318 | 21 | 59      | 56.488   | F         | 0.500   | -0.824 |       |
| SNCC | 2005 | 318 | 22 | 0       | 7.527    | F         | 0.500   | -0.531 |       |
| CMB  | 2005 | 318 | 21 | 59      | 30.532   | F         | 0.500   | 0.336  |       |
| CIA  | 2005 | 318 | 22 | 0       | 15.054   | F         | 0.500   | -0.345 |       |
| FMP  | 2005 | 318 | 22 | 0       | 13.884   | F         | 0.500   | -0.108 |       |
| SN28 | 2005 | 318 | 21 | 59      | 50.280   | F         | 0.500   | 2.195  |       |
| VCS  | 2005 | 318 | 22 | 0       | 11.804   | F         | 0.500   | 1.099  |       |
| MWC  | 2005 | 318 | 22 | 0       | 14.206   | F         | 0.500   | 1.076  |       |
| SN48 | 2005 | 318 | 21 | 59      | 45.165   | F         | 0.500   | 1.580  |       |
| ISA  | 2005 | 318 | 21 | 59      | 58.555   | F         | 0.500   | -1.555 |       |
| SN38 | 2005 | 318 | 21 | 59      | 47.615   | F         | 0.500   | 1.786  |       |
| P05C | 2005 | 318 | 21 | 59      | 18.913   | F         | 0.500   | -1.773 |       |
| DEC  | 2005 | 318 | 22 | 0       | 11.691   | F         | 0.500   | 1.185  |       |
| CHF  | 2005 | 318 | 22 | 0       | 14.179   | F         | 0.500   | 1.730  |       |
| CWC  | 2005 | 318 | 21 | 59      | 59.255   | F         | 0.500   | 0.892  |       |

|      |      |     |    |    |        |   |       |        |
|------|------|-----|----|----|--------|---|-------|--------|
| SN95 | 2005 | 318 | 21 | 59 | 28.126 | F | 0.500 | -1.411 |
| SN73 | 2005 | 318 | 21 | 59 | 31.702 | F | 0.500 | -2.164 |
| RPV  | 2005 | 318 | 22 | 0  | 13.151 | F | 0.500 | -0.075 |
| SN84 | 2005 | 318 | 21 | 59 | 30.127 | F | 0.500 | -1.531 |
| LGU  | 2005 | 318 | 22 | 0  | 4.757  | F | 0.500 | -1.117 |
| DJJ  | 2005 | 318 | 22 | 0  | 10.392 | F | 0.500 | 0.036  |
| SN62 | 2005 | 318 | 21 | 59 | 33.940 | F | 0.500 | -2.246 |
| TOV  | 2005 | 318 | 22 | 0  | 6.856  | F | 0.500 | -0.532 |
| SN76 | 2005 | 318 | 21 | 59 | 35.069 | F | 0.500 | -0.150 |
| SN57 | 2005 | 318 | 21 | 59 | 41.592 | F | 0.500 | 1.064  |
| R05C | 2005 | 318 | 21 | 59 | 27.971 | F | 0.500 | -0.723 |
| R06C | 2005 | 318 | 21 | 59 | 34.744 | F | 0.500 | 0.190  |
| SN55 | 2005 | 318 | 21 | 59 | 40.770 | F | 0.500 | 1.004  |
| SN47 | 2005 | 318 | 21 | 59 | 45.082 | F | 0.500 | 1.478  |
| R07C | 2005 | 318 | 21 | 59 | 41.247 | F | 0.500 | 0.717  |
| SN52 | 2005 | 318 | 21 | 59 | 36.977 | F | 0.500 | -1.978 |
| T06C | 2005 | 318 | 21 | 59 | 40.013 | F | 0.500 | -1.994 |
| SN86 | 2005 | 318 | 21 | 59 | 31.711 | F | 0.500 | -0.584 |
| SN66 | 2005 | 318 | 21 | 59 | 37.648 | F | 0.500 | -0.222 |
| OSI  | 2005 | 318 | 22 | 0  | 5.340  | F | 0.500 | 0.126  |
| SN67 | 2005 | 318 | 21 | 59 | 39.178 | F | 0.500 | 0.635  |
| SN27 | 2005 | 318 | 21 | 59 | 51.138 | F | 0.500 | 2.852  |
| SN46 | 2005 | 318 | 21 | 59 | 44.977 | F | 0.500 | 1.307  |
| MLAC | 2005 | 318 | 21 | 59 | 47.170 | F | 0.500 | 2.067  |
| S08C | 2005 | 318 | 21 | 59 | 53.231 | F | 0.500 | 2.175  |
| SN75 | 2005 | 318 | 21 | 59 | 34.911 | F | 0.500 | -0.580 |
| TIN  | 2005 | 318 | 21 | 59 | 54.510 | F | 0.500 | 1.303  |
| SN37 | 2005 | 318 | 21 | 59 | 48.067 | F | 0.500 | 2.084  |
| SN36 | 2005 | 318 | 21 | 59 | 48.287 | F | 0.500 | 2.256  |
| SN56 | 2005 | 318 | 21 | 59 | 40.731 | F | 0.500 | 0.114  |
| SN16 | 2005 | 318 | 21 | 59 | 53.382 | F | 0.500 | 2.256  |
| RCT  | 2005 | 318 | 21 | 59 | 48.508 | F | 0.500 | -1.355 |
| SN26 | 2005 | 318 | 21 | 59 | 49.753 | F | 0.500 | 2.011  |
| S06C | 2005 | 318 | 21 | 59 | 34.464 | F | 0.500 | -1.095 |
| SN53 | 2005 | 318 | 21 | 59 | 37.822 | F | 0.500 | -1.642 |
| SN21 | 2005 | 318 | 21 | 59 | 43.012 | F | 0.500 | -1.783 |
| SN64 | 2005 | 318 | 21 | 59 | 36.646 | F | 0.500 | -0.922 |
| SN65 | 2005 | 318 | 21 | 59 | 37.394 | F | 0.500 | -0.330 |
| SN25 | 2005 | 318 | 21 | 59 | 48.574 | F | 0.500 | 0.664  |
| SN43 | 2005 | 318 | 21 | 59 | 40.516 | F | 0.500 | -1.192 |
| SN45 | 2005 | 318 | 21 | 59 | 43.331 | F | 0.500 | 0.503  |
| SN22 | 2005 | 318 | 21 | 59 | 43.577 | F | 0.500 | -1.328 |
| SN44 | 2005 | 318 | 21 | 59 | 42.144 | F | 0.500 | -0.323 |
| SN11 | 2005 | 318 | 21 | 59 | 45.322 | F | 0.500 | -1.582 |
| SN15 | 2005 | 318 | 21 | 59 | 50.191 | F | 0.500 | 1.041  |
| HELL | 2005 | 318 | 21 | 59 | 48.426 | F | 0.500 | -1.167 |
| SN54 | 2005 | 318 | 21 | 59 | 38.802 | F | 0.500 | -0.543 |
| SN34 | 2005 | 318 | 21 | 59 | 45.185 | F | 0.500 | 0.182  |
| SN14 | 2005 | 318 | 21 | 59 | 49.289 | F | 0.500 | 0.441  |
| SN23 | 2005 | 318 | 21 | 59 | 44.892 | F | 0.500 | -0.584 |
| KCC  | 2005 | 318 | 21 | 59 | 43.148 | F | 0.500 | 0.130  |
| DBO  | 2005 | 318 | 21 | 58 | 38.087 | F | 0.500 | 1.878  |

|      |     |    |    |        |          |            |         |
|------|-----|----|----|--------|----------|------------|---------|
| 2005 | 324 | 12 | 53 | 7.2055 | 53.84300 | -164.09300 | 30.0000 |
|------|-----|----|----|--------|----------|------------|---------|

17

4.255

|      |      |     |    |   |        |   |       |        |
|------|------|-----|----|---|--------|---|-------|--------|
| S06C | 2005 | 324 | 13 | 5 | 12.785 | F | 0.500 | 0.011  |
| SNCC | 2005 | 324 | 13 | 6 | 4.820  | F | 0.500 | -0.478 |
| V03C | 2005 | 324 | 13 | 5 | 19.435 | F | 0.500 | -0.308 |
| CVS  | 2005 | 324 | 13 | 4 | 45.290 | F | 0.500 | 1.208  |
| SCZ2 | 2005 | 324 | 13 | 5 | 54.991 | F | 0.500 | -1.022 |
| MNRC | 2005 | 324 | 13 | 4 | 41.503 | F | 0.500 | 2.692  |
| S04C | 2005 | 324 | 13 | 5 | 3.547  | F | 0.500 | 0.431  |
| O01C | 2005 | 324 | 13 | 4 | 14.949 | F | 0.500 | 1.883  |
| BNLO | 2005 | 324 | 13 | 4 | 58.993 | F | 0.500 | -0.608 |

|      |      |     |    |   |        |   |       |        |
|------|------|-----|----|---|--------|---|-------|--------|
| RPV  | 2005 | 324 | 13 | 6 | 8.067  | F | 0.500 | -1.482 |
| U04C | 2005 | 324 | 13 | 5 | 20.954 | F | 0.500 | 0.679  |
| FMP  | 2005 | 324 | 13 | 6 | 9.464  | F | 0.500 | -1.200 |
| P01C | 2005 | 324 | 13 | 4 | 26.202 | F | 0.500 | 1.818  |
| M04C | 2005 | 324 | 13 | 4 | 15.344 | F | 0.500 | 0.035  |
| HAST | 2005 | 324 | 13 | 5 | 12.462 | F | 0.500 | -0.613 |
| PACP | 2005 | 324 | 13 | 5 | 8.951  | F | 0.500 | 0.045  |
| SMM  | 2005 | 324 | 13 | 5 | 39.198 | F | 0.500 | 0.644  |
| PKD  | 2005 | 324 | 13 | 5 | 26.793 | F | 0.500 | -0.033 |
| SLA  | 2005 | 324 | 13 | 5 | 55.750 | F | 0.500 | -0.784 |
| GASB | 2005 | 324 | 13 | 4 | 29.773 | F | 0.500 | 1.308  |
| RRX  | 2005 | 324 | 13 | 6 | 9.000  | F | 0.500 | -0.614 |
| WENL | 2005 | 324 | 13 | 4 | 58.966 | F | 0.500 | 0.924  |
| SUTB | 2005 | 324 | 13 | 4 | 40.764 | F | 0.500 | -0.222 |
| GSC  | 2005 | 324 | 13 | 6 | 5.625  | F | 0.500 | -1.259 |
| ORV  | 2005 | 324 | 13 | 4 | 39.172 | F | 0.500 | -1.090 |
| V04C | 2005 | 324 | 13 | 5 | 27.801 | F | 0.500 | 0.637  |
| SN67 | 2005 | 324 | 13 | 5 | 15.474 | F | 0.500 | 0.258  |
| ADO  | 2005 | 324 | 13 | 6 | 8.759  | F | 0.500 | -0.724 |
| ELFS | 2005 | 324 | 13 | 4 | 36.963 | F | 0.500 | 0.097  |
| TOV  | 2005 | 324 | 13 | 6 | 0.674  | F | 0.500 | -0.672 |
| P05C | 2005 | 324 | 13 | 4 | 50.029 | F | 0.500 | -1.294 |
| WVOR | 2005 | 324 | 13 | 4 | 37.274 | F | 0.500 | -1.334 |
| SN47 | 2005 | 324 | 13 | 5 | 22.516 | F | 0.500 | 0.536  |
| MPP  | 2005 | 324 | 13 | 5 | 45.535 | F | 0.500 | 0.521  |
| SN48 | 2005 | 324 | 13 | 5 | 21.545 | F | 0.500 | 0.051  |
| MPM  | 2005 | 324 | 13 | 5 | 52.809 | F | 0.500 | -0.224 |
| ISA  | 2005 | 324 | 13 | 5 | 46.103 | F | 0.500 | -2.085 |
| SN38 | 2005 | 324 | 13 | 5 | 25.259 | F | 0.500 | 0.639  |
| TPNV | 2005 | 324 | 13 | 5 | 54.334 | F | 0.500 | -0.502 |
| GRA  | 2005 | 324 | 13 | 5 | 44.590 | F | 0.500 | 0.585  |
| M03C | 2005 | 324 | 13 | 4 | 17.799 | F | 0.500 | 0.206  |
| M06C | 2005 | 324 | 13 | 4 | 33.293 | F | 0.500 | -0.220 |
| TIN  | 2005 | 324 | 13 | 5 | 36.776 | F | 0.500 | 0.865  |
| Q04C | 2005 | 324 | 13 | 4 | 48.985 | F | 0.500 | 0.397  |
| R07C | 2005 | 324 | 13 | 5 | 18.484 | F | 0.500 | 0.492  |
| LGU  | 2005 | 324 | 13 | 5 | 58.608 | F | 0.500 | -1.192 |
| R06C | 2005 | 324 | 13 | 5 | 9.923  | F | 0.500 | 0.072  |
| SHO  | 2005 | 324 | 13 | 6 | 4.877  | F | 0.500 | -0.375 |
| WDC  | 2005 | 324 | 13 | 4 | 21.196 | F | 0.500 | 0.835  |
| RCT  | 2005 | 324 | 13 | 5 | 33.422 | F | 0.500 | -0.890 |
| SN28 | 2005 | 324 | 13 | 5 | 28.614 | F | 0.500 | 0.834  |
| HEC  | 2005 | 324 | 13 | 6 | 15.450 | F | 0.500 | -0.616 |
| CIA  | 2005 | 324 | 13 | 6 | 12.122 | F | 0.500 | -1.130 |
| SN46 | 2005 | 324 | 13 | 5 | 23.756 | F | 0.500 | 1.166  |
| SN37 | 2005 | 324 | 13 | 5 | 26.304 | F | 0.500 | 1.005  |
| SVD  | 2005 | 324 | 13 | 6 | 16.141 | F | 0.500 | -1.012 |
| R04C | 2005 | 324 | 13 | 4 | 58.648 | F | 0.500 | 0.012  |
| SN26 | 2005 | 324 | 13 | 5 | 29.919 | F | 0.500 | 1.755  |
| CWC  | 2005 | 324 | 13 | 5 | 44.174 | F | 0.500 | 0.404  |
| LRL  | 2005 | 324 | 13 | 5 | 56.154 | F | 0.500 | -1.256 |
| MUR  | 2005 | 324 | 13 | 6 | 20.791 | F | 0.500 | -0.849 |
| O05C | 2005 | 324 | 13 | 4 | 41.138 | F | 0.500 | -0.458 |
| DJJ  | 2005 | 324 | 13 | 6 | 4.106  | F | 0.500 | -0.944 |
| DEC  | 2005 | 324 | 13 | 6 | 4.258  | F | 0.500 | -0.386 |
| SN27 | 2005 | 324 | 13 | 5 | 30.121 | F | 0.500 | 1.542  |
| SN66 | 2005 | 324 | 13 | 5 | 14.546 | F | 0.500 | -0.034 |
| M05C | 2005 | 324 | 13 | 4 | 25.813 | F | 0.500 | 0.015  |
| JCS  | 2005 | 324 | 13 | 6 | 32.790 | F | 0.500 | 0.067  |
| PLM  | 2005 | 324 | 13 | 6 | 27.112 | F | 0.500 | -0.415 |
| SN36 | 2005 | 324 | 13 | 5 | 27.483 | F | 0.500 | 1.723  |
| O04C | 2005 | 324 | 13 | 4 | 36.514 | F | 0.500 | -0.142 |
| SN76 | 2005 | 324 | 13 | 5 | 11.166 | F | 0.500 | 0.122  |

|      |      |     |    |   |        |   |       |        |
|------|------|-----|----|---|--------|---|-------|--------|
| SN23 | 2005 | 324 | 13 | 5 | 26.866 | F | 0.500 | 0.355  |
| OSI  | 2005 | 324 | 13 | 5 | 56.972 | F | 0.500 | -0.419 |
| KCC  | 2005 | 324 | 13 | 5 | 23.676 | F | 0.500 | 0.445  |
| EDW2 | 2005 | 324 | 13 | 6 | 0.032  | F | 0.500 | -0.758 |
| SN25 | 2005 | 324 | 13 | 5 | 30.044 | F | 0.500 | 1.302  |
| SN51 | 2005 | 324 | 13 | 5 | 16.712 | F | 0.500 | -0.423 |
| SN16 | 2005 | 324 | 13 | 5 | 34.555 | F | 0.500 | 1.855  |
| S05C | 2005 | 324 | 13 | 5 | 12.953 | F | 0.500 | -0.786 |
| SN71 | 2005 | 324 | 13 | 5 | 9.469  | F | 0.500 | -0.461 |
| VCS  | 2005 | 324 | 13 | 6 | 3.594  | F | 0.500 | -0.514 |
| SN86 | 2005 | 324 | 13 | 5 | 7.073  | F | 0.500 | -0.108 |
| BBR  | 2005 | 324 | 13 | 6 | 16.458 | F | 0.500 | -0.913 |
| SN56 | 2005 | 324 | 13 | 5 | 18.476 | F | 0.500 | 0.132  |
| SN12 | 2005 | 324 | 13 | 5 | 29.992 | F | 0.500 | -0.150 |
| VTV  | 2005 | 324 | 13 | 6 | 9.613  | F | 0.500 | -0.542 |
| DGR  | 2005 | 324 | 13 | 6 | 21.517 | F | 0.500 | -1.218 |
| R05C | 2005 | 324 | 13 | 5 | 2.086  | F | 0.500 | -0.379 |
| SN15 | 2005 | 324 | 13 | 5 | 32.233 | F | 0.500 | 1.775  |
| SN65 | 2005 | 324 | 13 | 5 | 15.136 | F | 0.500 | 0.258  |
| PAS  | 2005 | 324 | 13 | 6 | 6.372  | F | 0.500 | -0.764 |
| SN55 | 2005 | 324 | 13 | 5 | 18.241 | F | 0.500 | 0.492  |
| MWC  | 2005 | 324 | 13 | 6 | 6.939  | F | 0.500 | -0.772 |
| T06C | 2005 | 324 | 13 | 5 | 22.330 | F | 0.500 | -0.542 |
| SN43 | 2005 | 324 | 13 | 5 | 21.256 | F | 0.500 | 0.083  |
| LAVA | 2005 | 324 | 13 | 4 | 55.153 | F | 0.500 | -0.334 |
| SN21 | 2005 | 324 | 13 | 5 | 25.902 | F | 0.500 | -0.743 |
| BFS  | 2005 | 324 | 13 | 6 | 10.416 | F | 0.500 | -0.448 |
| CHF  | 2005 | 324 | 13 | 6 | 6.329  | F | 0.500 | -0.378 |
| SN34 | 2005 | 324 | 13 | 5 | 26.010 | F | 0.500 | 0.849  |
| SN52 | 2005 | 324 | 13 | 5 | 18.092 | F | 0.500 | -0.267 |
| SN22 | 2005 | 324 | 13 | 5 | 25.952 | F | 0.500 | -0.275 |
| SN14 | 2005 | 324 | 13 | 5 | 31.523 | F | 0.500 | 1.053  |
| HELL | 2005 | 324 | 13 | 5 | 32.052 | F | 0.500 | -0.653 |
| SN85 | 2005 | 324 | 13 | 5 | 7.900  | F | 0.500 | 0.054  |
| SN11 | 2005 | 324 | 13 | 5 | 28.876 | F | 0.500 | -0.750 |
| SN62 | 2005 | 324 | 13 | 5 | 14.110 | F | 0.500 | -0.212 |
| CMB  | 2005 | 324 | 13 | 5 | 6.511  | F | 0.500 | 0.400  |
| S08C | 2005 | 324 | 13 | 5 | 33.856 | F | 0.500 | 1.661  |
| SN75 | 2005 | 324 | 13 | 5 | 11.987 | F | 0.500 | 0.065  |
| SN45 | 2005 | 324 | 13 | 5 | 22.833 | F | 0.500 | 0.891  |
| SN44 | 2005 | 324 | 13 | 5 | 22.528 | F | 0.500 | 0.589  |
| SN95 | 2005 | 324 | 13 | 5 | 4.359  | F | 0.500 | -0.122 |
| SN64 | 2005 | 324 | 13 | 5 | 14.919 | F | 0.500 | -0.112 |
| SN84 | 2005 | 324 | 13 | 5 | 7.151  | F | 0.500 | -0.198 |
| SN54 | 2005 | 324 | 13 | 5 | 17.725 | F | 0.500 | 0.220  |
| SN73 | 2005 | 324 | 13 | 5 | 10.787 | F | 0.500 | -0.164 |
| SN53 | 2005 | 324 | 13 | 5 | 18.144 | F | 0.500 | -0.118 |
| BDM  | 2005 | 324 | 13 | 4 | 54.483 | F | 0.500 | 0.996  |

|      |      |     |    |         |          |           |          |        |
|------|------|-----|----|---------|----------|-----------|----------|--------|
| 2005 | 357  | 21  | 47 | 32.1055 | -1.38600 | -77.51700 | 192.9000 |        |
| ARV  | 2005 | 357 | 22 | 3       | 44.415   | F         | 0.500    | 0.286  |
| M04C | 2005 | 357 | 22 | 4       | 59.324   | F         | 0.500    | -0.662 |
| CIA  | 2005 | 357 | 22 | 3       | 27.599   | F         | 0.500    | 0.276  |
| BBR  | 2005 | 357 | 22 | 3       | 21.179   | F         | 0.500    | 0.893  |
| HAST | 2005 | 357 | 22 | 4       | 17.496   | F         | 0.500    | -0.780 |
| WDC  | 2005 | 357 | 22 | 4       | 52.601   | F         | 0.500    | -4.094 |
| HUMO | 2005 | 357 | 22 | 5       | 11.824   | F         | 0.500    | -2.756 |
| T06C | 2005 | 357 | 22 | 4       | 3.876    | F         | 0.500    | -2.391 |
| BDM  | 2005 | 357 | 22 | 4       | 32.340   | F         | 0.500    | 0.216  |
| RPV  | 2005 | 357 | 22 | 3       | 30.386   | F         | 0.500    | 0.642  |
| M03C | 2005 | 357 | 22 | 4       | 56.594   | F         | 0.500    | -1.848 |
| KCC  | 2005 | 357 | 22 | 4       | 4.300    | F         | 0.500    | -1.250 |
| Q04C | 2005 | 357 | 22 | 4       | 33.810   | F         | 0.500    | -0.479 |

|      |      |     |    |   |        |   |       |        |
|------|------|-----|----|---|--------|---|-------|--------|
| GASB | 2005 | 357 | 22 | 4 | 53.845 | F | 0.500 | 2.150  |
| SN45 | 2005 | 357 | 22 | 4 | 7.245  | F | 0.500 | 0.657  |
| PHL  | 2005 | 357 | 22 | 4 | 1.066  | F | 0.500 | -1.038 |
| BNLO | 2005 | 357 | 22 | 4 | 28.904 | F | 0.500 | -0.296 |
| OSI  | 2005 | 357 | 22 | 3 | 38.534 | F | 0.500 | -0.918 |
| O05C | 2005 | 357 | 22 | 4 | 40.010 | F | 0.500 | 1.091  |
| J02A | 2005 | 357 | 22 | 5 | 23.972 | F | 0.500 | -0.560 |
| GRA  | 2005 | 357 | 22 | 3 | 47.042 | F | 0.500 | 1.128  |
| JCS  | 2005 | 357 | 22 | 3 | 8.534  | F | 0.500 | 0.774  |
| SN47 | 2005 | 357 | 22 | 4 | 7.158  | F | 0.500 | 1.547  |
| M06C | 2005 | 357 | 22 | 4 | 44.287 | F | 0.500 | -0.487 |
| SLA  | 2005 | 357 | 22 | 3 | 36.748 | F | 0.500 | 0.392  |
| SN56 | 2005 | 357 | 22 | 4 | 10.200 | F | 0.500 | 0.552  |
| MUR  | 2005 | 357 | 22 | 3 | 17.935 | F | 0.500 | 0.498  |
| SN48 | 2005 | 357 | 22 | 4 | 6.960  | F | 0.500 | 1.355  |
| HEC  | 2005 | 357 | 22 | 3 | 20.566 | F | 0.500 | 1.320  |
| VTV  | 2005 | 357 | 22 | 3 | 25.704 | F | 0.500 | -0.559 |
| S05C | 2005 | 357 | 22 | 4 | 12.750 | F | 0.500 | -1.470 |
| VCS  | 2005 | 357 | 22 | 3 | 32.545 | F | 0.500 | -0.367 |
| DGR  | 2005 | 357 | 22 | 3 | 17.635 | F | 0.500 | 1.515  |
| CMB  | 2005 | 357 | 22 | 4 | 19.956 | F | 0.500 | -0.127 |
| DJJ  | 2005 | 357 | 22 | 3 | 33.423 | F | 0.500 | 0.343  |
| MPM  | 2005 | 357 | 22 | 3 | 39.507 | F | 0.500 | -0.218 |
| P01C | 2005 | 357 | 22 | 4 | 57.525 | F | 0.500 | 1.970  |
| PLM  | 2005 | 357 | 22 | 3 | 13.221 | F | 0.500 | 0.626  |
| WVOR | 2005 | 357 | 22 | 4 | 38.346 | F | 0.500 | -1.959 |
| SN28 | 2005 | 357 | 22 | 4 | 1.697  | F | 0.500 | 1.515  |
| SN25 | 2005 | 357 | 22 | 4 | 0.921  | F | 0.500 | 0.233  |
| PIN  | 2005 | 357 | 22 | 5 | 6.683  | F | 0.500 | -1.346 |
| SN21 | 2005 | 357 | 22 | 4 | 0.890  | F | 0.500 | -2.143 |
| RRX  | 2005 | 357 | 22 | 3 | 26.228 | F | 0.500 | 0.606  |
| TOV  | 2005 | 357 | 22 | 3 | 36.659 | F | 0.500 | -0.115 |
| RCT  | 2005 | 357 | 22 | 3 | 55.933 | F | 0.500 | -0.924 |
| SN36 | 2005 | 357 | 22 | 4 | 3.020  | F | 0.500 | 0.146  |
| SN85 | 2005 | 357 | 22 | 4 | 18.962 | F | 0.500 | 0.391  |
| SN46 | 2005 | 357 | 22 | 4 | 7.134  | F | 0.500 | 1.311  |
| SN44 | 2005 | 357 | 22 | 4 | 5.470  | F | 0.500 | -1.318 |
| SN34 | 2005 | 357 | 22 | 4 | 3.457  | F | 0.500 | -0.541 |
| SN23 | 2005 | 357 | 22 | 4 | 1.900  | F | 0.500 | -1.375 |
| SN62 | 2005 | 357 | 22 | 4 | 11.854 | F | 0.500 | -1.513 |
| SN71 | 2005 | 357 | 22 | 4 | 15.759 | F | 0.500 | -1.331 |
| EDW2 | 2005 | 357 | 22 | 3 | 33.543 | F | 0.500 | -1.308 |
| SN16 | 2005 | 357 | 22 | 3 | 57.884 | F | 0.500 | 1.237  |
| TPNV | 2005 | 357 | 22 | 3 | 37.367 | F | 0.500 | 1.431  |
| SN37 | 2005 | 357 | 22 | 4 | 3.961  | F | 0.500 | 1.217  |
| LAVA | 2005 | 357 | 22 | 4 | 28.364 | F | 0.500 | -0.058 |
| SN53 | 2005 | 357 | 22 | 4 | 9.139  | F | 0.500 | -0.941 |
| SN12 | 2005 | 357 | 22 | 3 | 59.105 | F | 0.500 | -0.781 |
| LRL  | 2005 | 357 | 22 | 3 | 36.522 | F | 0.500 | -0.214 |
| SN43 | 2005 | 357 | 22 | 4 | 6.122  | F | 0.500 | -1.774 |
| HELL | 2005 | 357 | 22 | 3 | 57.559 | F | 0.500 | -0.357 |
| R06C | 2005 | 357 | 22 | 4 | 17.344 | F | 0.500 | 1.325  |
| SN66 | 2005 | 357 | 22 | 4 | 13.711 | F | 0.500 | 1.117  |
| S08C | 2005 | 357 | 22 | 3 | 58.796 | F | 0.500 | 1.405  |
| O04C | 2005 | 357 | 22 | 4 | 43.225 | F | 0.500 | 0.111  |
| PAS  | 2005 | 357 | 22 | 3 | 31.254 | F | 0.500 | 0.595  |
| SN38 | 2005 | 357 | 22 | 4 | 4.337  | F | 0.500 | 1.356  |
| SN95 | 2005 | 357 | 22 | 4 | 21.467 | F | 0.500 | 0.001  |
| SN76 | 2005 | 357 | 22 | 4 | 17.078 | F | 0.500 | 1.644  |
| R04C | 2005 | 357 | 22 | 4 | 26.519 | F | 0.500 | 0.304  |
| SN55 | 2005 | 357 | 22 | 4 | 10.760 | F | 0.500 | 0.445  |
| SN65 | 2005 | 357 | 22 | 4 | 12.963 | F | 0.500 | 0.158  |
| SN27 | 2005 | 357 | 22 | 4 | 1.165  | F | 0.500 | 1.212  |

|      |      |     |    |   |        |   |       |        |
|------|------|-----|----|---|--------|---|-------|--------|
| P05C | 2005 | 357 | 22 | 4 | 31.533 | F | 0.500 | -0.051 |
| GSC  | 2005 | 357 | 22 | 3 | 28.241 | F | 0.500 | 0.862  |
| TIN  | 2005 | 357 | 22 | 3 | 54.620 | F | 0.500 | 0.781  |
| SN14 | 2005 | 357 | 22 | 3 | 59.405 | F | 0.500 | -0.458 |
| R05C | 2005 | 357 | 22 | 4 | 23.031 | F | 0.500 | 0.111  |
| CHF  | 2005 | 357 | 22 | 3 | 31.184 | F | 0.500 | 0.226  |
| SN75 | 2005 | 357 | 22 | 4 | 15.779 | F | 0.500 | 0.459  |
| S06C | 2005 | 357 | 22 | 4 | 13.993 | F | 0.500 | -0.431 |
| ORV  | 2005 | 357 | 22 | 4 | 40.769 | F | 0.500 | 0.352  |
| BFS  | 2005 | 357 | 22 | 3 | 27.350 | F | 0.500 | 0.457  |

|      |     |   |    |         |          |           |         |    |       |
|------|-----|---|----|---------|----------|-----------|---------|----|-------|
| 2005 | 216 | 9 | 26 | 58.6938 | -3.65700 | 140.17799 | 40.0000 | 19 | 5.884 |
|------|-----|---|----|---------|----------|-----------|---------|----|-------|

|      |      |     |   |    |        |   |       |        |
|------|------|-----|---|----|--------|---|-------|--------|
| ADO  | 2005 | 216 | 9 | 51 | 25.526 | F | 0.500 | -0.989 |
| CHF  | 2005 | 216 | 9 | 51 | 23.384 | F | 0.500 | -0.921 |
| DBO  | 2005 | 216 | 9 | 51 | 0.740  | F | 0.500 | -0.696 |
| ARV  | 2005 | 216 | 9 | 51 | 20.739 | F | 0.500 | 0.271  |
| SDD  | 2005 | 216 | 9 | 51 | 25.704 | F | 0.500 | 0.188  |
| MSJ  | 2005 | 216 | 9 | 51 | 29.735 | F | 0.500 | 1.284  |
| BOR  | 2005 | 216 | 9 | 51 | 31.759 | F | 0.500 | 1.103  |
| PIN  | 2005 | 216 | 9 | 51 | 9.254  | F | 0.500 | -0.853 |
| HATC | 2005 | 216 | 9 | 51 | 7.797  | F | 0.500 | -1.012 |
| V04C | 2005 | 216 | 9 | 51 | 12.086 | F | 0.500 | -0.067 |
| EDW2 | 2005 | 216 | 9 | 51 | 24.190 | F | 0.500 | 0.258  |
| DEV  | 2005 | 216 | 9 | 51 | 30.401 | F | 0.500 | 0.619  |
| CVS  | 2005 | 216 | 9 | 51 | 3.991  | F | 0.500 | -1.387 |
| SN86 | 2005 | 216 | 9 | 51 | 16.327 | F | 0.500 | 0.075  |
| M02C | 2005 | 216 | 9 | 51 | 3.309  | F | 0.500 | 0.169  |
| GSC  | 2005 | 216 | 9 | 51 | 29.777 | F | 0.500 | 1.236  |
| SN56 | 2005 | 216 | 9 | 51 | 19.875 | F | 0.500 | 0.838  |
| SN26 | 2005 | 216 | 9 | 51 | 22.907 | F | 0.500 | 1.597  |
| RCT  | 2005 | 216 | 9 | 51 | 16.233 | F | 0.500 | -2.117 |
| YBH  | 2005 | 216 | 9 | 51 | 2.699  | F | 0.500 | -0.980 |
| BBR  | 2005 | 216 | 9 | 51 | 28.462 | F | 0.500 | -0.459 |
| N02C | 2005 | 216 | 9 | 51 | 1.596  | F | 0.500 | 0.202  |
| SN43 | 2005 | 216 | 9 | 51 | 17.131 | F | 0.500 | -0.663 |
| LRL  | 2005 | 216 | 9 | 51 | 26.103 | F | 0.500 | 0.972  |
| HUMO | 2005 | 216 | 9 | 51 | 1.809  | F | 0.500 | -0.791 |
| TPH  | 2005 | 216 | 9 | 51 | 27.275 | F | 0.500 | 1.244  |
| ELFS | 2005 | 216 | 9 | 51 | 11.124 | F | 0.500 | -0.507 |
| WVOR | 2005 | 216 | 9 | 51 | 18.228 | F | 0.500 | -0.360 |
| WDC  | 2005 | 216 | 9 | 51 | 3.553  | F | 0.500 | -0.809 |
| FUR  | 2005 | 216 | 9 | 51 | 28.962 | F | 0.500 | 1.558  |
| CMB  | 2005 | 216 | 9 | 51 | 13.064 | F | 0.500 | -0.413 |
| SN57 | 2005 | 216 | 9 | 51 | 20.994 | F | 0.500 | 1.622  |
| CLC  | 2005 | 216 | 9 | 51 | 26.263 | F | 0.500 | 0.880  |
| ORV  | 2005 | 216 | 9 | 51 | 7.283  | F | 0.500 | -1.665 |
| SN21 | 2005 | 216 | 9 | 51 | 15.988 | F | 0.500 | -1.347 |
| SN28 | 2005 | 216 | 9 | 51 | 23.945 | F | 0.500 | 1.519  |
| S08C | 2005 | 216 | 9 | 51 | 24.084 | F | 0.500 | 1.111  |
| O05C | 2005 | 216 | 9 | 51 | 9.177  | F | 0.500 | -1.628 |
| M03C | 2005 | 216 | 9 | 51 | 4.280  | F | 0.500 | -1.919 |
| SN24 | 2005 | 216 | 9 | 51 | 20.396 | F | 0.500 | 0.650  |
| BFS  | 2005 | 216 | 9 | 51 | 25.702 | F | 0.500 | 0.062  |
| R07C | 2005 | 216 | 9 | 51 | 19.956 | F | 0.500 | 0.650  |
| SN95 | 2005 | 216 | 9 | 51 | 13.756 | F | 0.500 | -0.523 |
| SN16 | 2005 | 216 | 9 | 51 | 23.366 | F | 0.500 | 0.843  |
| M05C | 2005 | 216 | 9 | 51 | 9.053  | F | 0.500 | -0.961 |
| DGR  | 2005 | 216 | 9 | 51 | 29.079 | F | 0.500 | 0.877  |
| SN23 | 2005 | 216 | 9 | 51 | 18.312 | F | 0.500 | -0.670 |
| SN84 | 2005 | 216 | 9 | 51 | 13.763 | F | 0.500 | -1.034 |
| S04C | 2005 | 216 | 9 | 51 | 9.286  | F | 0.500 | -0.795 |
| CAP  | 2005 | 216 | 9 | 51 | 28.338 | F | 0.500 | 0.835  |
| SN51 | 2005 | 216 | 9 | 51 | 14.144 | F | 0.500 | -0.709 |

|      |      |     |   |    |        |   |       |        |
|------|------|-----|---|----|--------|---|-------|--------|
| SN63 | 2005 | 216 | 9 | 51 | 15.496 | F | 0.500 | -0.808 |
| SN53 | 2005 | 216 | 9 | 51 | 16.066 | F | 0.500 | -0.785 |
| SN37 | 2005 | 216 | 9 | 51 | 22.703 | F | 0.500 | 1.485  |
| M06C | 2005 | 216 | 9 | 51 | 11.447 | F | 0.500 | -1.042 |
| O04C | 2005 | 216 | 9 | 51 | 8.895  | F | 0.500 | -1.524 |
| SN25 | 2005 | 216 | 9 | 51 | 21.700 | F | 0.500 | 0.775  |
| SN27 | 2005 | 216 | 9 | 51 | 23.444 | F | 0.500 | 1.562  |
| SN74 | 2005 | 216 | 9 | 51 | 14.440 | F | 0.500 | -1.199 |
| SN11 | 2005 | 216 | 9 | 51 | 16.656 | F | 0.500 | -1.367 |
| SN12 | 2005 | 216 | 9 | 51 | 18.599 | F | 0.500 | -0.888 |
| S05C | 2005 | 216 | 9 | 51 | 12.408 | F | 0.500 | -1.545 |
| LAVA | 2005 | 216 | 9 | 51 | 11.314 | F | 0.500 | -0.688 |
| SN42 | 2005 | 216 | 9 | 51 | 16.165 | F | 0.500 | -0.759 |
| SN73 | 2005 | 216 | 9 | 51 | 13.637 | F | 0.500 | -1.135 |
| SN22 | 2005 | 216 | 9 | 51 | 17.079 | F | 0.500 | -1.094 |
| SN52 | 2005 | 216 | 9 | 51 | 15.220 | F | 0.500 | -0.625 |
| SN47 | 2005 | 216 | 9 | 51 | 22.001 | F | 0.500 | 1.393  |
| SN62 | 2005 | 216 | 9 | 51 | 14.265 | F | 0.500 | -1.040 |
| SN45 | 2005 | 216 | 9 | 51 | 20.348 | F | 0.500 | 1.169  |
| R04C | 2005 | 216 | 9 | 51 | 9.967  | F | 0.500 | -1.222 |
| SN36 | 2005 | 216 | 9 | 51 | 22.863 | F | 0.500 | 1.979  |
| MPM  | 2005 | 216 | 9 | 51 | 26.943 | F | 0.500 | 1.168  |
| MOD  | 2005 | 216 | 9 | 51 | 12.530 | F | 0.500 | -0.396 |
| SHO  | 2005 | 216 | 9 | 51 | 32.201 | F | 0.500 | 2.014  |
| SN38 | 2005 | 216 | 9 | 51 | 23.252 | F | 0.500 | 1.444  |
| SN48 | 2005 | 216 | 9 | 51 | 22.534 | F | 0.500 | 1.488  |
| SN44 | 2005 | 216 | 9 | 51 | 18.749 | F | 0.500 | 0.357  |
| PHL  | 2005 | 216 | 9 | 51 | 12.189 | F | 0.500 | -1.320 |
| HOPS | 2005 | 216 | 9 | 51 | 2.803  | F | 0.500 | 0.080  |
| TOV  | 2005 | 216 | 9 | 51 | 18.943 | F | 0.500 | -1.903 |
| SBPX | 2005 | 216 | 9 | 51 | 27.305 | F | 0.500 | -0.275 |

|      |      |     |    |        |          |           |         |        |       |
|------|------|-----|----|--------|----------|-----------|---------|--------|-------|
| 2005 | 220  | 8   | 34 | 1.1260 | -3.79500 | 140.15601 | 10.0000 | 20     | 4.396 |
| SN62 | 2005 | 220 | 8  | 58     | 24.978   | F         | 0.500   | -1.215 |       |
| SN23 | 2005 | 220 | 8  | 58     | 29.269   | F         | 0.500   | -0.596 |       |
| SN52 | 2005 | 220 | 8  | 58     | 26.180   | F         | 0.500   | -0.554 |       |
| SN43 | 2005 | 220 | 8  | 58     | 28.241   | F         | 0.500   | -0.442 |       |
| T06C | 2005 | 220 | 8  | 58     | 26.380   | F         | 0.500   | -1.078 |       |
| HOPS | 2005 | 220 | 8  | 58     | 13.940   | F         | 0.500   | 0.306  |       |
| SMM  | 2005 | 220 | 8  | 58     | 26.708   | F         | 0.500   | -0.139 |       |
| MWC  | 2005 | 220 | 8  | 58     | 33.867   | F         | 0.500   | -1.345 |       |
| CIA  | 2005 | 220 | 8  | 58     | 32.632   | F         | 0.500   | -1.154 |       |
| OSI  | 2005 | 220 | 8  | 58     | 31.886   | F         | 0.500   | -0.368 |       |
| WENL | 2005 | 220 | 8  | 58     | 18.277   | F         | 0.500   | -0.759 |       |
| PDU  | 2005 | 220 | 8  | 58     | 36.045   | F         | 0.500   | -0.291 |       |
| ISA  | 2005 | 220 | 8  | 58     | 31.517   | F         | 0.500   | -1.143 |       |
| TOV  | 2005 | 220 | 8  | 58     | 30.622   | F         | 0.500   | -1.071 |       |
| GRA  | 2005 | 220 | 8  | 58     | 36.961   | F         | 0.500   | 0.541  |       |
| SLA  | 2005 | 220 | 8  | 58     | 38.178   | F         | 0.500   | 0.681  |       |
| MNRC | 2005 | 220 | 8  | 58     | 16.904   | F         | 0.500   | 0.568  |       |
| SBPX | 2005 | 220 | 8  | 58     | 38.280   | F         | 0.500   | -0.150 |       |
| PKD  | 2005 | 220 | 8  | 58     | 23.842   | F         | 0.500   | -0.484 |       |
| M03C | 2005 | 220 | 8  | 58     | 15.682   | F         | 0.500   | -1.436 |       |
| PAS  | 2005 | 220 | 8  | 58     | 33.344   | F         | 0.500   | -0.937 |       |
| M06C | 2005 | 220 | 8  | 58     | 22.542   | F         | 0.500   | -0.866 |       |
| PACP | 2005 | 220 | 8  | 58     | 20.708   | F         | 0.500   | -0.586 |       |
| SVD  | 2005 | 220 | 8  | 58     | 39.002   | F         | 0.500   | 0.274  |       |
| RRX  | 2005 | 220 | 8  | 58     | 39.282   | F         | 0.500   | 0.743  |       |
| O05C | 2005 | 220 | 8  | 58     | 20.214   | F         | 0.500   | -1.499 |       |
| TIN  | 2005 | 220 | 8  | 58     | 33.317   | F         | 0.500   | -0.109 |       |
| BBR  | 2005 | 220 | 8  | 58     | 39.836   | F         | 0.500   | 0.066  |       |
| N02C | 2005 | 220 | 8  | 58     | 12.549   | F         | 0.500   | 0.216  |       |
| O04C | 2005 | 220 | 8  | 58     | 20.085   | F         | 0.500   | -1.244 |       |

|      |      |     |   |    |        |   |       |        |
|------|------|-----|---|----|--------|---|-------|--------|
| RCT  | 2005 | 220 | 8 | 58 | 27.133 | F | 0.500 | -2.089 |
| DEV  | 2005 | 220 | 8 | 58 | 41.121 | F | 0.500 | 0.488  |
| SN27 | 2005 | 220 | 8 | 58 | 34.452 | F | 0.500 | 1.692  |
| CHF  | 2005 | 220 | 8 | 58 | 34.412 | F | 0.500 | -0.747 |
| M05C | 2005 | 220 | 8 | 58 | 20.252 | F | 0.500 | -0.681 |
| SN67 | 2005 | 220 | 8 | 58 | 31.025 | F | 0.500 | 1.403  |
| SUTB | 2005 | 220 | 8 | 58 | 17.523 | F | 0.500 | -1.146 |
| CLC  | 2005 | 220 | 8 | 58 | 37.103 | F | 0.500 | 0.854  |
| M02C | 2005 | 220 | 8 | 58 | 14.065 | F | 0.500 | -0.005 |
| R06C | 2005 | 220 | 8 | 58 | 28.949 | F | 0.500 | 0.759  |
| LRL  | 2005 | 220 | 8 | 58 | 36.991 | F | 0.500 | 0.997  |
| S04C | 2005 | 220 | 8 | 58 | 20.453 | F | 0.500 | -0.516 |
| S05C | 2005 | 220 | 8 | 58 | 23.070 | F | 0.500 | -1.767 |
| BOR  | 2005 | 220 | 8 | 58 | 43.473 | F | 0.500 | 1.971  |
| BFS  | 2005 | 220 | 8 | 58 | 36.229 | F | 0.500 | -0.264 |
| FUR  | 2005 | 220 | 8 | 58 | 39.705 | F | 0.500 | 1.433  |
| SN57 | 2005 | 220 | 8 | 58 | 31.658 | F | 0.500 | 1.401  |
| SN84 | 2005 | 220 | 8 | 58 | 24.682 | F | 0.500 | -1.004 |
| CMB  | 2005 | 220 | 8 | 58 | 23.932 | F | 0.500 | -0.435 |
| SN26 | 2005 | 220 | 8 | 58 | 33.665 | F | 0.500 | 1.479  |
| MOD  | 2005 | 220 | 8 | 58 | 23.280 | F | 0.500 | -0.568 |
| SN46 | 2005 | 220 | 8 | 58 | 32.469 | F | 0.500 | 1.428  |
| LAVA | 2005 | 220 | 8 | 58 | 22.340 | F | 0.500 | -0.563 |
| YBH  | 2005 | 220 | 8 | 58 | 14.107 | F | 0.500 | -0.500 |
| SN16 | 2005 | 220 | 8 | 58 | 34.222 | F | 0.500 | 0.823  |
| SN56 | 2005 | 220 | 8 | 58 | 30.589 | F | 0.500 | 0.664  |
| SN12 | 2005 | 220 | 8 | 58 | 29.353 | F | 0.500 | -1.009 |
| SN71 | 2005 | 220 | 8 | 58 | 22.710 | F | 0.500 | -1.628 |
| PLM  | 2005 | 220 | 8 | 58 | 41.214 | F | 0.500 | 1.134  |
| SN37 | 2005 | 220 | 8 | 58 | 33.864 | F | 0.500 | 1.768  |
| HEC  | 2005 | 220 | 8 | 58 | 42.777 | F | 0.500 | 1.468  |
| SN44 | 2005 | 220 | 8 | 58 | 29.459 | F | 0.500 | 0.182  |
| DGR  | 2005 | 220 | 8 | 58 | 40.048 | F | 0.500 | 1.002  |
| WDC  | 2005 | 220 | 8 | 58 | 14.701 | F | 0.500 | -0.578 |
| SN95 | 2005 | 220 | 8 | 58 | 24.276 | F | 0.500 | -0.895 |
| EDW2 | 2005 | 220 | 8 | 58 | 35.623 | F | 0.500 | 0.832  |
| R04C | 2005 | 220 | 8 | 58 | 21.189 | F | 0.500 | -0.897 |
| HUMO | 2005 | 220 | 8 | 58 | 12.575 | F | 0.500 | -0.968 |
| SN36 | 2005 | 220 | 8 | 58 | 33.723 | F | 0.500 | 1.962  |
| ORV  | 2005 | 220 | 8 | 58 | 18.668 | F | 0.500 | -1.182 |
| CAP  | 2005 | 220 | 8 | 58 | 39.255 | F | 0.500 | 0.910  |
| SN28 | 2005 | 220 | 8 | 58 | 34.655 | F | 0.500 | 1.348  |
| SN74 | 2005 | 220 | 8 | 58 | 25.506 | F | 0.500 | -1.024 |
| MPM  | 2005 | 220 | 8 | 58 | 37.834 | F | 0.500 | 1.189  |
| SN86 | 2005 | 220 | 8 | 58 | 26.798 | F | 0.500 | -0.351 |
| P05C | 2005 | 220 | 8 | 58 | 22.613 | F | 0.500 | -0.937 |
| SHO  | 2005 | 220 | 8 | 58 | 43.188 | F | 0.500 | 2.134  |
| R07C | 2005 | 220 | 8 | 58 | 31.120 | F | 0.500 | 0.928  |
| SN63 | 2005 | 220 | 8 | 58 | 26.110 | F | 0.500 | -1.085 |
| SN25 | 2005 | 220 | 8 | 58 | 32.456 | F | 0.500 | 0.656  |
| SN48 | 2005 | 220 | 8 | 58 | 33.547 | F | 0.500 | 1.619  |
| SN11 | 2005 | 220 | 8 | 58 | 27.509 | F | 0.500 | -1.391 |
| SN45 | 2005 | 220 | 8 | 58 | 31.359 | F | 0.500 | 1.299  |
| SN42 | 2005 | 220 | 8 | 58 | 27.474 | F | 0.500 | -0.339 |
| GSC  | 2005 | 220 | 8 | 58 | 41.210 | F | 0.500 | 1.811  |
| SN53 | 2005 | 220 | 8 | 58 | 26.977 | F | 0.500 | -0.766 |
| SN38 | 2005 | 220 | 8 | 58 | 34.464 | F | 0.500 | 1.775  |

|      |      |     |    |        |          |           |         |        |       |
|------|------|-----|----|--------|----------|-----------|---------|--------|-------|
| 2005 | 249  | 1   | 16 | 4.1898 | 24.08400 | 122.19100 | 32.0000 | 21     | 1.840 |
| SN75 | 2005 | 249 | 1  | 39     | 57.396   | F         | 0.500   | -0.981 |       |
| CIA  | 2005 | 249 | 1  | 40     | 17.461   | F         | 0.500   | 0.658  |       |
| FUR  | 2005 | 249 | 1  | 40     | 13.171   | F         | 0.500   | 1.200  |       |
| ORV  | 2005 | 249 | 1  | 39     | 44.722   | F         | 0.500   | -2.336 |       |



|      |      |     |   |    |        |   |       |        |
|------|------|-----|---|----|--------|---|-------|--------|
| SHO  | 2005 | 249 | 1 | 40 | 17.696 | F | 0.500 | 1.670  |
| SN67 | 2005 | 249 | 1 | 40 | 0.128  | F | 0.500 | 0.576  |
| ELFS | 2005 | 249 | 1 | 39 | 45.742 | F | 0.500 | -0.489 |
| VCS  | 2005 | 249 | 1 | 40 | 14.800 | F | 0.500 | 0.263  |
| LRL  | 2005 | 249 | 1 | 40 | 13.503 | F | 0.500 | 0.618  |
| ISA  | 2005 | 249 | 1 | 40 | 8.543  | F | 0.500 | -0.907 |
| ADO  | 2005 | 249 | 1 | 40 | 16.924 | F | 0.500 | 0.206  |
| O04C | 2005 | 249 | 1 | 39 | 44.658 | F | 0.500 | -1.377 |
| R05C | 2005 | 249 | 1 | 39 | 54.376 | F | 0.500 | -0.570 |
| SUTB | 2005 | 249 | 1 | 39 | 45.491 | F | 0.500 | -1.340 |
| R04C | 2005 | 249 | 1 | 39 | 51.462 | F | 0.500 | -1.156 |
| HEC  | 2005 | 249 | 1 | 40 | 21.065 | F | 0.500 | 1.694  |
| MOD  | 2005 | 249 | 1 | 39 | 43.190 | F | 0.500 | -0.508 |
| SN53 | 2005 | 249 | 1 | 39 | 59.357 | F | 0.500 | -0.762 |
| SN16 | 2005 | 249 | 1 | 40 | 6.773  | F | 0.500 | 1.278  |
| M06C | 2005 | 249 | 1 | 39 | 44.594 | F | 0.500 | -0.675 |
| LAVA | 2005 | 249 | 1 | 39 | 51.024 | F | 0.500 | -1.153 |
| GSC  | 2005 | 249 | 1 | 40 | 17.932 | F | 0.500 | 1.615  |
| U04C | 2005 | 249 | 1 | 39 | 59.495 | F | 0.500 | 0.118  |
| OSI  | 2005 | 249 | 1 | 40 | 13.008 | F | 0.500 | 0.929  |
| DGR  | 2005 | 249 | 1 | 40 | 22.107 | F | 0.500 | 1.613  |
| SN37 | 2005 | 249 | 1 | 40 | 4.721  | F | 0.500 | 1.757  |
| SN48 | 2005 | 249 | 1 | 40 | 3.468  | F | 0.500 | 1.564  |
| SN25 | 2005 | 249 | 1 | 40 | 4.592  | F | 0.500 | 0.590  |
| SN47 | 2005 | 249 | 1 | 40 | 3.198  | F | 0.500 | 1.072  |
| SN38 | 2005 | 249 | 1 | 40 | 4.379  | F | 0.500 | 1.644  |
| EDW2 | 2005 | 249 | 1 | 40 | 14.912 | F | 0.500 | 1.501  |
| TIN  | 2005 | 249 | 1 | 40 | 6.580  | F | 0.500 | 0.197  |
| SN86 | 2005 | 249 | 1 | 39 | 56.364 | F | 0.500 | -0.370 |
| S08C | 2005 | 249 | 1 | 40 | 6.583  | F | 0.500 | 1.191  |
| SN62 | 2005 | 249 | 1 | 39 | 57.091 | F | 0.500 | -1.347 |
| SN52 | 2005 | 249 | 1 | 39 | 58.672 | F | 0.500 | -0.867 |
| TPH  | 2005 | 249 | 1 | 40 | 7.272  | F | 0.500 | 0.793  |
| CMB  | 2005 | 249 | 1 | 39 | 54.577 | F | 0.500 | -0.942 |
| SN84 | 2005 | 249 | 1 | 39 | 55.022 | F | 0.500 | -1.359 |
| BMN  | 2005 | 249 | 1 | 39 | 58.484 | F | 0.500 | -0.186 |
| SN12 | 2005 | 249 | 1 | 40 | 3.611  | F | 0.500 | -0.438 |
| SN74 | 2005 | 249 | 1 | 39 | 56.391 | F | 0.500 | -1.309 |
| KCC  | 2005 | 249 | 1 | 40 | 1.427  | F | 0.500 | -0.110 |
| SN24 | 2005 | 249 | 1 | 40 | 3.788  | F | 0.500 | 0.582  |
| SN43 | 2005 | 249 | 1 | 40 | 0.682  | F | 0.500 | -0.589 |
| SN51 | 2005 | 249 | 1 | 39 | 58.265 | F | 0.500 | -0.730 |
| SN23 | 2005 | 249 | 1 | 40 | 2.502  | F | 0.500 | -0.543 |
| T06C | 2005 | 249 | 1 | 40 | 0.377  | F | 0.500 | -0.822 |
| SN11 | 2005 | 249 | 1 | 40 | 2.202  | F | 0.500 | -0.988 |
| SN42 | 2005 | 249 | 1 | 40 | 0.384  | F | 0.500 | -0.473 |

|      |      |     |    |         |          |           |         |        |       |
|------|------|-----|----|---------|----------|-----------|---------|--------|-------|
| 2006 | 119  | 16  | 58 | 10.5785 | 60.49100 | 167.51601 | 11.0000 | 22     | 4.258 |
| LGU  | 2006 | 119 | 17 | 14      | 55.788   | F         | 0.500   | -0.675 |       |
| GRA  | 2006 | 119 | 17 | 14      | 37.752   | F         | 0.500   | 1.593  |       |
| PACP | 2006 | 119 | 17 | 14      | 8.649    | F         | 0.500   | -0.760 |       |
| GSC  | 2006 | 119 | 17 | 14      | 59.620   | F         | 0.500   | 1.116  |       |
| U04C | 2006 | 119 | 17 | 14      | 19.545   | F         | 0.500   | -0.458 |       |
| SVD  | 2006 | 119 | 17 | 15      | 9.796    | F         | 0.500   | 0.066  |       |
| HAST | 2006 | 119 | 17 | 14      | 12.742   | F         | 0.500   | -1.580 |       |
| ISA  | 2006 | 119 | 17 | 14      | 42.197   | F         | 0.500   | -1.100 |       |
| BBR  | 2006 | 119 | 17 | 15      | 9.744    | F         | 0.500   | 0.227  |       |
| PKD  | 2006 | 119 | 17 | 14      | 25.557   | F         | 0.500   | -0.573 |       |
| MPP  | 2006 | 119 | 17 | 14      | 43.364   | F         | 0.500   | 0.302  |       |
| MUR  | 2006 | 119 | 17 | 15      | 14.389   | F         | 0.500   | 0.017  |       |
| O09A | 2006 | 119 | 17 | 14      | 2.246    | F         | 0.500   | -0.712 |       |
| R04C | 2006 | 119 | 17 | 13      | 57.560   | F         | 0.500   | -0.221 |       |
| TOV  | 2006 | 119 | 17 | 14      | 57.305   | F         | 0.500   | -0.091 |       |

|      |      |     |    |    |        |   |       |        |
|------|------|-----|----|----|--------|---|-------|--------|
| SMM  | 2006 | 119 | 17 | 14 | 36.985 | F | 0.500 | 0.087  |
| DGR  | 2006 | 119 | 17 | 15 | 15.075 | F | 0.500 | -0.033 |
| FMP  | 2006 | 119 | 17 | 15 | 5.490  | F | 0.500 | -0.173 |
| DEC  | 2006 | 119 | 17 | 15 | 0.039  | F | 0.500 | 0.344  |
| K06A | 2006 | 119 | 17 | 13 | 13.034 | F | 0.500 | -0.175 |
| N09A | 2006 | 119 | 17 | 13 | 52.431 | F | 0.500 | -0.842 |
| SHO  | 2006 | 119 | 17 | 14 | 56.343 | F | 0.500 | 0.769  |
| RPV  | 2006 | 119 | 17 | 15 | 4.267  | F | 0.500 | -0.599 |
| OSI  | 2006 | 119 | 17 | 14 | 53.266 | F | 0.500 | -0.017 |
| CIA  | 2006 | 119 | 17 | 15 | 7.992  | F | 0.500 | -0.591 |
| R08A | 2006 | 119 | 17 | 14 | 16.676 | F | 0.500 | 0.113  |
| PLM  | 2006 | 119 | 17 | 15 | 20.028 | F | 0.500 | 0.429  |
| PAS  | 2006 | 119 | 17 | 15 | 2.202  | F | 0.500 | 0.343  |
| HEC  | 2006 | 119 | 17 | 15 | 7.755  | F | 0.500 | 0.965  |
| S05C | 2006 | 119 | 17 | 14 | 11.185 | F | 0.500 | -0.966 |
| ORV  | 2006 | 119 | 17 | 13 | 38.644 | F | 0.500 | -1.089 |
| S09A | 2006 | 119 | 17 | 14 | 29.834 | F | 0.500 | 0.229  |
| M07A | 2006 | 119 | 17 | 13 | 35.384 | F | 0.500 | -0.706 |
| SLA  | 2006 | 119 | 17 | 14 | 49.612 | F | 0.500 | 0.514  |
| N08A | 2006 | 119 | 17 | 13 | 48.790 | F | 0.500 | -1.078 |
| M05C | 2006 | 119 | 17 | 13 | 22.243 | F | 0.500 | -0.476 |
| LRL  | 2006 | 119 | 17 | 14 | 50.549 | F | 0.500 | -0.329 |
| SN71 | 2006 | 119 | 17 | 14 | 7.811  | F | 0.500 | -0.488 |
| MWC  | 2006 | 119 | 17 | 15 | 2.355  | F | 0.500 | 0.073  |
| SN26 | 2006 | 119 | 17 | 14 | 24.412 | F | 0.500 | 1.924  |
| RCT  | 2006 | 119 | 17 | 14 | 30.107 | F | 0.500 | -0.719 |
| VCS  | 2006 | 119 | 17 | 14 | 58.955 | F | 0.500 | 0.259  |
| WVOR | 2006 | 119 | 17 | 13 | 28.043 | F | 0.500 | -0.336 |
| BFS  | 2006 | 119 | 17 | 15 | 4.927  | F | 0.500 | 0.380  |
| SN46 | 2006 | 119 | 17 | 14 | 18.772 | F | 0.500 | 0.980  |
| YBH  | 2006 | 119 | 17 | 13 | 7.782  | F | 0.500 | 0.406  |
| RRX  | 2006 | 119 | 17 | 15 | 2.037  | F | 0.500 | 0.267  |
| O04C | 2006 | 119 | 17 | 13 | 33.955 | F | 0.500 | -0.558 |
| LAVA | 2006 | 119 | 17 | 13 | 53.075 | F | 0.500 | -0.826 |
| SN67 | 2006 | 119 | 17 | 14 | 11.807 | F | 0.500 | 1.256  |
| CHF  | 2006 | 119 | 17 | 15 | 1.467  | F | 0.500 | 0.333  |
| SN48 | 2006 | 119 | 17 | 14 | 16.472 | F | 0.500 | 0.765  |
| SN51 | 2006 | 119 | 17 | 14 | 14.320 | F | 0.500 | -0.651 |
| O07A | 2006 | 119 | 17 | 13 | 50.312 | F | 0.500 | -1.236 |
| M03C | 2006 | 119 | 17 | 13 | 16.141 | F | 0.500 | -0.564 |
| M06C | 2006 | 119 | 17 | 13 | 28.342 | F | 0.500 | -0.757 |
| SN66 | 2006 | 119 | 17 | 14 | 9.965  | F | 0.500 | -0.470 |
| R06C | 2006 | 119 | 17 | 14 | 5.398  | F | 0.500 | -0.257 |
| T06C | 2006 | 119 | 17 | 14 | 19.466 | F | 0.500 | -0.724 |
| SN47 | 2006 | 119 | 17 | 14 | 18.738 | F | 0.500 | 2.060  |
| SN38 | 2006 | 119 | 17 | 14 | 19.414 | F | 0.500 | 1.025  |
| MPM  | 2006 | 119 | 17 | 14 | 47.154 | F | 0.500 | 1.231  |
| SN25 | 2006 | 119 | 17 | 14 | 24.923 | F | 0.500 | 1.213  |
| P05C | 2006 | 119 | 17 | 13 | 47.631 | F | 0.500 | -1.450 |
| R07C | 2006 | 119 | 17 | 14 | 13.625 | F | 0.500 | 0.320  |
| Q08A | 2006 | 119 | 17 | 14 | 11.759 | F | 0.500 | -0.497 |
| O02C | 2006 | 119 | 17 | 13 | 23.711 | F | 0.500 | -0.372 |
| SN16 | 2006 | 119 | 17 | 14 | 28.618 | F | 0.500 | 1.881  |
| SN27 | 2006 | 119 | 17 | 14 | 25.618 | F | 0.500 | 3.061  |
| O08A | 2006 | 119 | 17 | 13 | 54.101 | F | 0.500 | -1.093 |
| WCN  | 2006 | 119 | 17 | 13 | 54.328 | F | 0.500 | -0.663 |
| SN21 | 2006 | 119 | 17 | 14 | 22.757 | F | 0.500 | -0.833 |
| N07B | 2006 | 119 | 17 | 13 | 42.907 | F | 0.500 | -1.200 |
| J06A | 2006 | 119 | 17 | 13 | 8.810  | F | 0.500 | -0.293 |
| O06A | 2006 | 119 | 17 | 13 | 43.779 | F | 0.500 | -1.232 |
| S08C | 2006 | 119 | 17 | 14 | 27.803 | F | 0.500 | 1.883  |
| SN28 | 2006 | 119 | 17 | 14 | 22.391 | F | 0.500 | 1.213  |
| SN36 | 2006 | 119 | 17 | 14 | 22.007 | F | 0.500 | 1.626  |

|      |      |     |    |    |        |   |       |        |
|------|------|-----|----|----|--------|---|-------|--------|
| TIN  | 2006 | 119 | 17 | 14 | 31.488 | F | 0.500 | 1.465  |
| CWC  | 2006 | 119 | 17 | 14 | 38.942 | F | 0.500 | 1.077  |
| SUTB | 2006 | 119 | 17 | 13 | 40.595 | F | 0.500 | -0.745 |
| SN62 | 2006 | 119 | 17 | 14 | 11.290 | F | 0.500 | -0.663 |
| SN37 | 2006 | 119 | 17 | 14 | 20.928 | F | 0.500 | 1.260  |
| MOD  | 2006 | 119 | 17 | 13 | 22.133 | F | 0.500 | -0.601 |
| O05C | 2006 | 119 | 17 | 13 | 38.310 | F | 0.500 | -1.177 |
| SN76 | 2006 | 119 | 17 | 14 | 6.987  | F | 0.500 | -0.181 |
| KCC  | 2006 | 119 | 17 | 14 | 20.338 | F | 0.500 | 0.833  |
| SN15 | 2006 | 119 | 17 | 14 | 26.728 | F | 0.500 | 1.520  |
| P09A | 2006 | 119 | 17 | 14 | 9.608  | F | 0.500 | -0.508 |
| SN52 | 2006 | 119 | 17 | 14 | 15.195 | F | 0.500 | -0.515 |
| SN22 | 2006 | 119 | 17 | 14 | 22.252 | F | 0.500 | -0.510 |
| BEK  | 2006 | 119 | 17 | 13 | 43.225 | F | 0.500 | -1.457 |
| SN23 | 2006 | 119 | 17 | 14 | 22.703 | F | 0.500 | -0.062 |
| SN73 | 2006 | 119 | 17 | 14 | 7.966  | F | 0.500 | -0.655 |
| SN53 | 2006 | 119 | 17 | 14 | 14.815 | F | 0.500 | -0.418 |
| SN54 | 2006 | 119 | 17 | 14 | 14.080 | F | 0.500 | 0.071  |
| S06C | 2006 | 119 | 17 | 14 | 9.524  | F | 0.500 | -0.403 |
| SN44 | 2006 | 119 | 17 | 14 | 18.464 | F | 0.500 | 0.407  |
| SN14 | 2006 | 119 | 17 | 14 | 26.614 | F | 0.500 | 0.921  |
| S04C | 2006 | 119 | 17 | 14 | 3.121  | F | 0.500 | -0.461 |

|      |      |     |    |         |           |           |         |        |       |
|------|------|-----|----|---------|-----------|-----------|---------|--------|-------|
| 2006 | 120  | 19  | 17 | 20.7508 | -27.01700 | -71.02200 | 12.0000 | 23     | 5.771 |
| SN66 | 2006 | 120 | 19 | 39      | 25.528    | F         | 0.500   | 0.503  |       |
| VCS  | 2006 | 120 | 19 | 38      | 48.260    | F         | 0.500   | 0.038  |       |
| ISA  | 2006 | 120 | 19 | 39      | 0.156     | F         | 0.500   | 0.313  |       |
| M06C | 2006 | 120 | 19 | 39      | 52.683    | F         | 0.500   | -1.159 |       |
| O05C | 2006 | 120 | 19 | 39      | 46.545    | F         | 0.500   | -0.428 |       |
| K06A | 2006 | 120 | 19 | 40      | 3.715     | F         | 0.500   | -0.949 |       |
| PAS  | 2006 | 120 | 19 | 38      | 46.325    | F         | 0.500   | 0.808  |       |
| FUR  | 2006 | 120 | 19 | 38      | 57.861    | F         | 0.500   | 1.375  |       |
| RRX  | 2006 | 120 | 19 | 38      | 44.645    | F         | 0.500   | 0.130  |       |
| MOD  | 2006 | 120 | 19 | 39      | 57.437    | F         | 0.500   | -0.745 |       |
| MPM  | 2006 | 120 | 19 | 38      | 58.243    | F         | 0.500   | 0.866  |       |
| I06A | 2006 | 120 | 19 | 40      | 12.378    | F         | 0.500   | 0.960  |       |
| L09A | 2006 | 120 | 19 | 39      | 43.729    | F         | 0.500   | -1.859 |       |
| LRL  | 2006 | 120 | 19 | 38      | 54.058    | F         | 0.500   | 0.497  |       |
| CHF  | 2006 | 120 | 19 | 38      | 47.021    | F         | 0.500   | 0.705  |       |
| GSC  | 2006 | 120 | 19 | 38      | 48.043    | F         | 0.500   | 1.092  |       |
| J06A | 2006 | 120 | 19 | 40      | 6.484     | F         | 0.500   | -0.698 |       |
| SVD  | 2006 | 120 | 19 | 38      | 39.876    | F         | 0.500   | 1.282  |       |
| M07A | 2006 | 120 | 19 | 39      | 47.494    | F         | 0.500   | -0.999 |       |
| GRA  | 2006 | 120 | 19 | 39      | 5.129     | F         | 0.500   | 1.166  |       |
| P05C | 2006 | 120 | 19 | 39      | 40.381    | F         | 0.500   | -0.073 |       |
| FMP  | 2006 | 120 | 19 | 38      | 43.858    | F         | 0.500   | 0.972  |       |
| BFS  | 2006 | 120 | 19 | 38      | 44.297    | F         | 0.500   | 0.860  |       |
| ORV  | 2006 | 120 | 19 | 39      | 46.658    | F         | 0.500   | -0.222 |       |
| SHO  | 2006 | 120 | 19 | 38      | 49.604    | F         | 0.500   | 1.186  |       |
| Q08A | 2006 | 120 | 19 | 39      | 22.451    | F         | 0.500   | 0.393  |       |
| O07A | 2006 | 120 | 19 | 39      | 37.744    | F         | 0.500   | 0.274  |       |
| SN44 | 2006 | 120 | 19 | 39      | 17.909    | F         | 0.500   | -1.427 |       |
| O08A | 2006 | 120 | 19 | 39      | 34.458    | F         | 0.500   | -0.396 |       |
| N08A | 2006 | 120 | 19 | 39      | 37.893    | F         | 0.500   | -0.555 |       |
| Q09A | 2006 | 120 | 19 | 39      | 18.360    | F         | 0.500   | 0.439  |       |
| SN47 | 2006 | 120 | 19 | 39      | 21.506    | F         | 0.500   | 1.748  |       |
| R08A | 2006 | 120 | 19 | 39      | 19.592    | F         | 0.500   | 0.363  |       |
| N09A | 2006 | 120 | 19 | 39      | 35.427    | F         | 0.500   | -0.256 |       |
| O06A | 2006 | 120 | 19 | 39      | 42.420    | F         | 0.500   | -0.289 |       |
| SN11 | 2006 | 120 | 19 | 39      | 10.502    | F         | 0.500   | -2.111 |       |
| O09A | 2006 | 120 | 19 | 39      | 28.006    | F         | 0.500   | -0.593 |       |
| P09A | 2006 | 120 | 19 | 39      | 22.587    | F         | 0.500   | -0.930 |       |
| JCS  | 2006 | 120 | 19 | 38      | 28.434    | F         | 0.500   | 1.311  |       |

|      |      |     |    |    |        |   |       |        |
|------|------|-----|----|----|--------|---|-------|--------|
| N07B | 2006 | 120 | 19 | 39 | 42.524 | F | 0.500 | -0.211 |
| R04C | 2006 | 120 | 19 | 39 | 34.111 | F | 0.500 | 0.047  |
| SN23 | 2006 | 120 | 19 | 39 | 14.123 | F | 0.500 | -1.847 |
| SN53 | 2006 | 120 | 19 | 39 | 20.407 | F | 0.500 | -1.062 |
| BBR  | 2006 | 120 | 19 | 38 | 40.591 | F | 0.500 | 1.465  |
| LGU  | 2006 | 120 | 19 | 38 | 51.458 | F | 0.500 | 0.711  |
| WCN  | 2006 | 120 | 19 | 39 | 36.556 | F | 0.500 | 0.620  |
| S04C | 2006 | 120 | 19 | 39 | 31.023 | F | 0.500 | 0.343  |
| SN16 | 2006 | 120 | 19 | 39 | 12.364 | F | 0.500 | 0.232  |
| SN14 | 2006 | 120 | 19 | 39 | 12.812 | F | 0.500 | -1.125 |
| S05C | 2006 | 120 | 19 | 39 | 22.266 | F | 0.500 | -1.432 |
| SN28 | 2006 | 120 | 19 | 39 | 16.642 | F | 0.500 | 0.641  |
| T06C | 2006 | 120 | 19 | 39 | 14.930 | F | 0.500 | -2.521 |
| SN36 | 2006 | 120 | 19 | 39 | 17.092 | F | 0.500 | -0.175 |
| SN15 | 2006 | 120 | 19 | 39 | 13.407 | F | 0.500 | -0.424 |
| R07C | 2006 | 120 | 19 | 39 | 23.306 | F | 0.500 | 0.889  |
| DGR  | 2006 | 120 | 19 | 38 | 35.826 | F | 0.500 | 1.373  |
| SN52 | 2006 | 120 | 19 | 39 | 18.909 | F | 0.500 | -1.861 |
| R06C | 2006 | 120 | 19 | 39 | 29.011 | F | 0.500 | 0.826  |
| MUR  | 2006 | 120 | 19 | 38 | 36.162 | F | 0.500 | 1.035  |
| LAVA | 2006 | 120 | 19 | 39 | 36.671 | F | 0.500 | -0.316 |
| S08C | 2006 | 120 | 19 | 39 | 13.726 | F | 0.500 | 0.628  |
| S09A | 2006 | 120 | 19 | 39 | 10.096 | F | 0.500 | 1.024  |
| SN25 | 2006 | 120 | 19 | 39 | 14.704 | F | 0.500 | -0.208 |
| BEK  | 2006 | 120 | 19 | 39 | 43.385 | F | 0.500 | 0.054  |
| S06C | 2006 | 120 | 19 | 39 | 24.789 | F | 0.500 | -0.596 |
| SN76 | 2006 | 120 | 19 | 39 | 28.214 | F | 0.500 | 0.826  |
| SN73 | 2006 | 120 | 19 | 39 | 25.639 | F | 0.500 | -0.778 |
| SN54 | 2006 | 120 | 19 | 39 | 21.986 | F | 0.500 | -0.387 |
| SN51 | 2006 | 120 | 19 | 39 | 19.622 | F | 0.500 | -1.973 |
| SN62 | 2006 | 120 | 19 | 39 | 22.659 | F | 0.500 | -1.154 |
| SN38 | 2006 | 120 | 19 | 39 | 18.853 | F | 0.500 | 0.689  |
| SN71 | 2006 | 120 | 19 | 39 | 25.671 | F | 0.500 | -0.798 |
| SN67 | 2006 | 120 | 19 | 39 | 26.642 | F | 0.500 | 1.874  |

|      |      |     |    |        |           |           |         |        |       |
|------|------|-----|----|--------|-----------|-----------|---------|--------|-------|
| 2006 | 120  | 21  | 41 | 7.0031 | -27.21100 | -71.05600 | 12.0000 | 24     | 8.563 |
| SN62 | 2006 | 120 | 22 | 3      | 10.400    | F         | 0.500   | -1.088 |       |
| N02C | 2006 | 120 | 22 | 3      | 52.922    | F         | 0.500   | -1.025 |       |
| K06A | 2006 | 120 | 22 | 3      | 51.455    | F         | 0.500   | -0.839 |       |
| HUMO | 2006 | 120 | 22 | 4      | 0.967     | F         | 0.500   | -0.140 |       |
| MPP  | 2006 | 120 | 22 | 2      | 49.855    | F         | 0.500   | 0.306  |       |
| FUR  | 2006 | 120 | 22 | 2      | 46.174    | F         | 0.500   | 1.942  |       |
| M03C | 2006 | 120 | 22 | 3      | 48.148    | F         | 0.500   | -2.736 |       |
| M06C | 2006 | 120 | 22 | 3      | 40.230    | F         | 0.500   | -1.293 |       |
| J06A | 2006 | 120 | 22 | 3      | 54.028    | F         | 0.500   | -0.636 |       |
| SVD  | 2006 | 120 | 22 | 2      | 28.119    | F         | 0.500   | 1.797  |       |
| PHL  | 2006 | 120 | 22 | 2      | 57.670    | F         | 0.500   | -0.317 |       |
| SDD  | 2006 | 120 | 22 | 2      | 26.024    | F         | 0.500   | 0.783  |       |
| M05C | 2006 | 120 | 22 | 3      | 44.024    | F         | 0.500   | -2.216 |       |
| PAS  | 2006 | 120 | 22 | 2      | 34.268    | F         | 0.500   | 1.054  |       |
| HEC  | 2006 | 120 | 22 | 2      | 28.621    | F         | 0.500   | 0.682  |       |
| VCS  | 2006 | 120 | 22 | 2      | 36.528    | F         | 0.500   | 0.601  |       |
| Q04C | 2006 | 120 | 22 | 3      | 27.650    | F         | 0.500   | -1.071 |       |
| MWC  | 2006 | 120 | 22 | 2      | 34.141    | F         | 0.500   | 0.729  |       |
| DEC  | 2006 | 120 | 22 | 2      | 35.709    | F         | 0.500   | 0.606  |       |
| YBH  | 2006 | 120 | 22 | 3      | 54.830    | F         | 0.500   | -1.451 |       |
| BFS  | 2006 | 120 | 22 | 2      | 31.876    | F         | 0.500   | 0.727  |       |
| MCCM | 2006 | 120 | 22 | 3      | 31.499    | F         | 0.500   | -0.559 |       |
| FMP  | 2006 | 120 | 22 | 2      | 31.454    | F         | 0.500   | 0.880  |       |
| I06A | 2006 | 120 | 22 | 3      | 59.760    | F         | 0.500   | 1.159  |       |
| SLA  | 2006 | 120 | 22 | 2      | 43.608    | F         | 0.500   | 1.366  |       |
| TPNV | 2006 | 120 | 22 | 2      | 46.517    | F         | 0.500   | 1.569  |       |
| CWC  | 2006 | 120 | 22 | 2      | 53.077    | F         | 0.500   | 1.563  |       |

|      |      |     |    |   |        |   |       |        |
|------|------|-----|----|---|--------|---|-------|--------|
| P06A | 2006 | 120 | 22 | 3 | 26.944 | F | 0.500 | -0.267 |
| ORV  | 2006 | 120 | 22 | 3 | 34.074 | F | 0.500 | -0.458 |
| TPH  | 2006 | 120 | 22 | 2 | 58.728 | F | 0.500 | -0.969 |
| GRA  | 2006 | 120 | 22 | 2 | 52.982 | F | 0.500 | 1.282  |
| LGU  | 2006 | 120 | 22 | 2 | 38.987 | F | 0.500 | 0.564  |
| SHO  | 2006 | 120 | 22 | 2 | 37.579 | F | 0.500 | 1.399  |
| CIA  | 2006 | 120 | 22 | 2 | 29.283 | F | 0.500 | 0.609  |
| O06A | 2006 | 120 | 22 | 3 | 29.879 | F | 0.500 | -0.520 |
| GSC  | 2006 | 120 | 22 | 2 | 36.102 | F | 0.500 | 1.408  |
| VES  | 2006 | 120 | 22 | 2 | 52.071 | F | 0.500 | -0.341 |
| P05C | 2006 | 120 | 22 | 3 | 27.505 | F | 0.500 | -0.617 |
| DGR  | 2006 | 120 | 22 | 2 | 23.357 | F | 0.500 | 1.174  |
| MPM  | 2006 | 120 | 22 | 2 | 46.288 | F | 0.500 | 1.181  |
| N08A | 2006 | 120 | 22 | 3 | 25.042 | F | 0.500 | -1.144 |
| JCS  | 2006 | 120 | 22 | 2 | 15.633 | F | 0.500 | 0.779  |
| N07B | 2006 | 120 | 22 | 3 | 29.705 | F | 0.500 | -0.742 |
| O07A | 2006 | 120 | 22 | 3 | 24.675 | F | 0.500 | -0.512 |
| Q07A | 2006 | 120 | 22 | 3 | 15.559 | F | 0.500 | 0.221  |
| PLM  | 2006 | 120 | 22 | 2 | 19.986 | F | 0.500 | 1.022  |
| Q08A | 2006 | 120 | 22 | 3 | 10.249 | F | 0.500 | 0.457  |
| S04C | 2006 | 120 | 22 | 3 | 18.831 | F | 0.500 | 0.508  |
| Q09A | 2006 | 120 | 22 | 3 | 6.204  | F | 0.500 | 0.534  |
| SN22 | 2006 | 120 | 22 | 3 | 1.174  | F | 0.500 | -2.224 |
| MUR  | 2006 | 120 | 22 | 2 | 23.998 | F | 0.500 | 1.145  |
| SN26 | 2006 | 120 | 22 | 3 | 2.781  | F | 0.500 | -0.192 |
| SAO  | 2006 | 120 | 22 | 3 | 14.752 | F | 0.500 | 1.117  |
| R04C | 2006 | 120 | 22 | 3 | 21.033 | F | 0.500 | -0.693 |
| SN21 | 2006 | 120 | 22 | 3 | 0.715  | F | 0.500 | -1.704 |
| N09A | 2006 | 120 | 22 | 3 | 22.541 | F | 0.500 | -0.894 |
| T06C | 2006 | 120 | 22 | 3 | 2.913  | F | 0.500 | -2.212 |
| SN36 | 2006 | 120 | 22 | 3 | 4.817  | F | 0.500 | -0.158 |
| PACP | 2006 | 120 | 22 | 3 | 14.179 | F | 0.500 | -0.405 |
| R06C | 2006 | 120 | 22 | 3 | 16.471 | F | 0.500 | 0.590  |
| R08A | 2006 | 120 | 22 | 3 | 7.672  | F | 0.500 | 0.716  |
| KCC  | 2006 | 120 | 22 | 3 | 4.606  | F | 0.500 | -1.031 |
| BBR  | 2006 | 120 | 22 | 2 | 28.140 | F | 0.500 | 1.282  |
| SN16 | 2006 | 120 | 22 | 3 | 0.197  | F | 0.500 | 0.346  |
| O08A | 2006 | 120 | 22 | 3 | 21.856 | F | 0.500 | -0.736 |
| SN23 | 2006 | 120 | 22 | 3 | 1.919  | F | 0.500 | -1.739 |
| SN27 | 2006 | 120 | 22 | 3 | 4.864  | F | 0.500 | 1.967  |
| O09A | 2006 | 120 | 22 | 3 | 15.476 | F | 0.500 | -0.880 |
| SN37 | 2006 | 120 | 22 | 3 | 5.706  | F | 0.500 | 0.561  |
| R07C | 2006 | 120 | 22 | 3 | 10.823 | F | 0.500 | 0.702  |
| P09A | 2006 | 120 | 22 | 3 | 10.406 | F | 0.500 | -0.868 |
| SN15 | 2006 | 120 | 22 | 3 | 1.181  | F | 0.500 | -0.359 |
| SN38 | 2006 | 120 | 22 | 3 | 6.437  | F | 0.500 | 0.556  |
| SN47 | 2006 | 120 | 22 | 3 | 9.130  | F | 0.500 | 1.662  |
| SN11 | 2006 | 120 | 22 | 2 | 58.605 | F | 0.500 | -1.695 |
| BEK  | 2006 | 120 | 22 | 3 | 30.629 | F | 0.500 | -0.378 |
| SN14 | 2006 | 120 | 22 | 3 | 1.031  | F | 0.500 | -0.609 |
| WCN  | 2006 | 120 | 22 | 3 | 23.962 | F | 0.500 | 0.332  |
| SN71 | 2006 | 120 | 22 | 3 | 13.153 | F | 0.500 | -0.981 |
| S08C | 2006 | 120 | 22 | 3 | 1.462  | F | 0.500 | 0.640  |
| SN67 | 2006 | 120 | 22 | 3 | 13.908 | F | 0.500 | 1.439  |
| SN28 | 2006 | 120 | 22 | 3 | 4.208  | F | 0.500 | 0.487  |
| LAVA | 2006 | 120 | 22 | 3 | 23.950 | F | 0.500 | -0.708 |
| S05C | 2006 | 120 | 22 | 3 | 9.697  | F | 0.500 | -1.667 |
| SN51 | 2006 | 120 | 22 | 3 | 7.410  | F | 0.500 | -1.860 |
| SN25 | 2006 | 120 | 22 | 3 | 2.364  | F | 0.500 | -0.251 |
| SN73 | 2006 | 120 | 22 | 3 | 13.178 | F | 0.500 | -0.914 |
| SN48 | 2006 | 120 | 22 | 3 | 8.822  | F | 0.500 | 0.833  |
| SN46 | 2006 | 120 | 22 | 3 | 7.351  | F | 0.500 | 0.148  |
| SN66 | 2006 | 120 | 22 | 3 | 13.139 | F | 0.500 | 0.420  |

|      |      |     |    |   |        |   |       |        |
|------|------|-----|----|---|--------|---|-------|--------|
| SN54 | 2006 | 120 | 22 | 3 | 9.540  | F | 0.500 | -0.523 |
| S09A | 2006 | 120 | 22 | 2 | 57.706 | F | 0.500 | 0.886  |
| SN76 | 2006 | 120 | 22 | 3 | 15.671 | F | 0.500 | 0.592  |
| S06C | 2006 | 120 | 22 | 3 | 12.485 | F | 0.500 | -0.580 |
| SN52 | 2006 | 120 | 22 | 3 | 6.854  | F | 0.500 | -1.599 |
| L02A | 2006 | 120 | 22 | 4 | 2.727  | F | 0.500 | 1.480  |

|      |      |     |    |         |           |            |         |        |       |
|------|------|-----|----|---------|-----------|------------|---------|--------|-------|
| 2006 | 123  | 15  | 26 | 46.0268 | -20.18700 | -174.12300 | 55.0000 | 25     | 5.737 |
| PACP | 2006 | 123 | 15 | 48      | 5.515     | F          | 0.500   | 2.895  |       |
| MNRC | 2006 | 123 | 15 | 48      | 11.697    | F          | 0.500   | 3.770  |       |
| BDM  | 2006 | 123 | 15 | 48      | 7.649     | F          | 0.500   | 2.711  |       |
| P01C | 2006 | 123 | 15 | 48      | 10.725    | F          | 0.500   | 4.405  |       |
| L09A | 2006 | 123 | 15 | 48      | 59.386    | F          | 0.500   | 0.177  |       |
| CVS  | 2006 | 123 | 15 | 48      | 5.832     | F          | 0.500   | 1.748  |       |
| OSI  | 2006 | 123 | 15 | 48      | 6.309     | F          | 0.500   | 1.810  |       |
| HOPS | 2006 | 123 | 15 | 48      | 7.418     | F          | 0.500   | 2.896  |       |
| MUR  | 2006 | 123 | 15 | 48      | 9.867     | F          | 0.500   | 0.860  |       |
| S04C | 2006 | 123 | 15 | 48      | 7.720     | F          | 0.500   | 2.107  |       |
| SVD  | 2006 | 123 | 15 | 48      | 13.431    | F          | 0.500   | 0.398  |       |
| I06A | 2006 | 123 | 15 | 48      | 56.412    | F          | 0.500   | 0.068  |       |
| RSS  | 2006 | 123 | 15 | 48      | 8.355     | F          | 0.500   | -1.934 |       |
| U05C | 2006 | 123 | 15 | 48      | 7.657     | F          | 0.500   | 1.932  |       |
| M08A | 2006 | 123 | 15 | 48      | 50.479    | F          | 0.500   | -0.788 |       |
| BFS  | 2006 | 123 | 15 | 48      | 9.451     | F          | 0.500   | -0.247 |       |
| WVOR | 2006 | 123 | 15 | 48      | 54.918    | F          | 0.500   | -0.932 |       |
| O02C | 2006 | 123 | 15 | 48      | 16.736    | F          | 0.500   | 1.654  |       |
| Q04C | 2006 | 123 | 15 | 48      | 15.221    | F          | 0.500   | 0.932  |       |
| I03A | 2006 | 123 | 15 | 48      | 36.283    | F          | 0.500   | -2.610 |       |
| K06A | 2006 | 123 | 15 | 48      | 49.141    | F          | 0.500   | 0.572  |       |
| Q03C | 2006 | 123 | 15 | 48      | 11.634    | F          | 0.500   | 2.943  |       |
| N02C | 2006 | 123 | 15 | 48      | 19.476    | F          | 0.500   | 3.171  |       |
| EDW2 | 2006 | 123 | 15 | 48      | 12.710    | F          | 0.500   | 1.410  |       |
| DJJ  | 2006 | 123 | 15 | 48      | 2.633     | F          | 0.500   | -0.156 |       |
| N07B | 2006 | 123 | 15 | 48      | 41.348    | F          | 0.500   | -1.785 |       |
| N09A | 2006 | 123 | 15 | 48      | 53.525    | F          | 0.500   | 0.747  |       |
| HUMO | 2006 | 123 | 15 | 48      | 30.216    | F          | 0.500   | -0.953 |       |
| SN51 | 2006 | 123 | 15 | 48      | 12.837    | F          | 0.500   | 0.470  |       |
| DBO  | 2006 | 123 | 15 | 48      | 30.548    | F          | 0.500   | -2.629 |       |
| SN71 | 2006 | 123 | 15 | 48      | 12.015    | F          | 0.500   | -0.544 |       |
| O06A | 2006 | 123 | 15 | 48      | 33.982    | F          | 0.500   | 0.083  |       |
| O07A | 2006 | 123 | 15 | 48      | 39.584    | F          | 0.500   | -0.319 |       |
| O08A | 2006 | 123 | 15 | 48      | 44.357    | F          | 0.500   | -0.996 |       |
| O09A | 2006 | 123 | 15 | 48      | 50.628    | F          | 0.500   | 0.017  |       |
| Q07A | 2006 | 123 | 15 | 48      | 30.894    | F          | 0.500   | -1.274 |       |
| RCT  | 2006 | 123 | 15 | 48      | 10.766    | F          | 0.500   | -0.923 |       |
| R04C | 2006 | 123 | 15 | 48      | 13.611    | F          | 0.500   | 0.344  |       |
| M02C | 2006 | 123 | 15 | 48      | 23.972    | F          | 0.500   | 0.794  |       |
| YBH  | 2006 | 123 | 15 | 48      | 26.558    | F          | 0.500   | 0.073  |       |
| VES  | 2006 | 123 | 15 | 48      | 9.268     | F          | 0.500   | -0.268 |       |
| VTV  | 2006 | 123 | 15 | 48      | 13.017    | F          | 0.500   | -1.036 |       |
| BBR  | 2006 | 123 | 15 | 48      | 15.070    | F          | 0.500   | -0.537 |       |
| J02A | 2006 | 123 | 15 | 48      | 32.303    | F          | 0.500   | -0.474 |       |
| P07A | 2006 | 123 | 15 | 48      | 34.173    | F          | 0.500   | -1.564 |       |
| SUTB | 2006 | 123 | 15 | 48      | 15.461    | F          | 0.500   | 0.814  |       |
| GRA  | 2006 | 123 | 15 | 48      | 28.944    | F          | 0.500   | -0.471 |       |
| FUR  | 2006 | 123 | 15 | 48      | 29.195    | F          | 0.500   | 0.022  |       |
| ELFS | 2006 | 123 | 15 | 48      | 30.591    | F          | 0.500   | -0.515 |       |
| SN21 | 2006 | 123 | 15 | 48      | 12.570    | F          | 0.500   | -0.746 |       |
| P09A | 2006 | 123 | 15 | 48      | 46.553    | F          | 0.500   | -0.558 |       |
| L02A | 2006 | 123 | 15 | 48      | 24.932    | F          | 0.500   | 0.821  |       |
| ISA  | 2006 | 123 | 15 | 48      | 13.178    | F          | 0.500   | 0.172  |       |
| SN28 | 2006 | 123 | 15 | 48      | 29.936    | F          | 0.500   | -0.053 |       |
| R08A | 2006 | 123 | 15 | 48      | 32.966    | F          | 0.500   | -0.197 |       |

|      |      |     |    |    |        |   |       |        |
|------|------|-----|----|----|--------|---|-------|--------|
| Q08A | 2006 | 123 | 15 | 48 | 35.930 | F | 0.500 | -1.699 |
| RRX  | 2006 | 123 | 15 | 48 | 18.631 | F | 0.500 | 0.180  |
| LAVA | 2006 | 123 | 15 | 48 | 17.041 | F | 0.500 | -1.064 |
| M05C | 2006 | 123 | 15 | 48 | 32.389 | F | 0.500 | -1.220 |
| Q09A | 2006 | 123 | 15 | 48 | 40.540 | F | 0.500 | -1.784 |
| S09A | 2006 | 123 | 15 | 48 | 34.406 | F | 0.500 | -0.773 |
| M03C | 2006 | 123 | 15 | 48 | 25.286 | F | 0.500 | -1.756 |
| SN38 | 2006 | 123 | 15 | 48 | 30.188 | F | 0.500 | 0.509  |
| SLA  | 2006 | 123 | 15 | 48 | 23.290 | F | 0.500 | 0.136  |
| M04C | 2006 | 123 | 15 | 48 | 30.758 | F | 0.500 | -1.364 |
| SN48 | 2006 | 123 | 15 | 48 | 29.637 | F | 0.500 | 0.482  |
| HEC  | 2006 | 123 | 15 | 48 | 23.099 | F | 0.500 | 0.163  |
| ORV  | 2006 | 123 | 15 | 48 | 17.870 | F | 0.500 | -0.775 |
| SHO  | 2006 | 123 | 15 | 48 | 29.682 | F | 0.500 | -0.467 |
| SN62 | 2006 | 123 | 15 | 48 | 14.279 | F | 0.500 | -1.041 |
| T06C | 2006 | 123 | 15 | 48 | 13.141 | F | 0.500 | -0.164 |
| SN73 | 2006 | 123 | 15 | 48 | 14.860 | F | 0.500 | -1.286 |
| S08C | 2006 | 123 | 15 | 48 | 28.009 | F | 0.500 | 0.457  |
| SN22 | 2006 | 123 | 15 | 48 | 14.494 | F | 0.500 | -1.473 |
| SN23 | 2006 | 123 | 15 | 48 | 17.046 | F | 0.500 | -0.914 |
| GSC  | 2006 | 123 | 15 | 48 | 23.262 | F | 0.500 | 0.668  |
| SN27 | 2006 | 123 | 15 | 48 | 29.237 | F | 0.500 | 1.981  |
| CWC  | 2006 | 123 | 15 | 48 | 20.626 | F | 0.500 | -0.634 |
| HATC | 2006 | 123 | 15 | 48 | 26.546 | F | 0.500 | -1.406 |
| O04C | 2006 | 123 | 15 | 48 | 26.353 | F | 0.500 | -0.377 |
| HELL | 2006 | 123 | 15 | 48 | 14.648 | F | 0.500 | -1.398 |
| LRL  | 2006 | 123 | 15 | 48 | 18.675 | F | 0.500 | 1.187  |
| P06A | 2006 | 123 | 15 | 48 | 29.963 | F | 0.500 | -0.152 |
| SN16 | 2006 | 123 | 15 | 48 | 26.364 | F | 0.500 | 0.428  |
| BEK  | 2006 | 123 | 15 | 48 | 27.790 | F | 0.500 | -0.741 |
| MLAC | 2006 | 123 | 15 | 48 | 23.876 | F | 0.500 | 0.156  |
| MPM  | 2006 | 123 | 15 | 48 | 23.371 | F | 0.500 | 0.649  |
| SN47 | 2006 | 123 | 15 | 48 | 28.653 | F | 0.500 | 1.857  |
| SN26 | 2006 | 123 | 15 | 48 | 25.743 | F | 0.500 | 0.147  |
| SN37 | 2006 | 123 | 15 | 48 | 27.760 | F | 0.500 | 0.781  |
| S06C | 2006 | 123 | 15 | 48 | 17.512 | F | 0.500 | -1.032 |
| SN53 | 2006 | 123 | 15 | 48 | 16.895 | F | 0.500 | -0.282 |
| CMB  | 2006 | 123 | 15 | 48 | 15.070 | F | 0.500 | -0.513 |
| SN46 | 2006 | 123 | 15 | 48 | 24.597 | F | 0.500 | -0.016 |
| SN44 | 2006 | 123 | 15 | 48 | 19.924 | F | 0.500 | 0.190  |
| SN25 | 2006 | 123 | 15 | 48 | 22.326 | F | 0.500 | -0.725 |
| TIN  | 2006 | 123 | 15 | 48 | 23.253 | F | 0.500 | -0.720 |
| SN54 | 2006 | 123 | 15 | 48 | 19.531 | F | 0.500 | -0.339 |
| SN14 | 2006 | 123 | 15 | 48 | 19.901 | F | 0.500 | -1.253 |
| KCC  | 2006 | 123 | 15 | 48 | 17.874 | F | 0.500 | -0.386 |
| WCN  | 2006 | 123 | 15 | 48 | 28.484 | F | 0.500 | -0.037 |
| SN67 | 2006 | 123 | 15 | 48 | 27.168 | F | 0.500 | 1.139  |
| SN76 | 2006 | 123 | 15 | 48 | 23.372 | F | 0.500 | -0.824 |
| R06C | 2006 | 123 | 15 | 48 | 25.014 | F | 0.500 | -0.350 |
| SN66 | 2006 | 123 | 15 | 48 | 23.300 | F | 0.500 | -0.828 |
| SN36 | 2006 | 123 | 15 | 48 | 26.001 | F | 0.500 | 0.555  |
| SN85 | 2006 | 123 | 15 | 48 | 20.093 | F | 0.500 | -0.478 |
| SN15 | 2006 | 123 | 15 | 48 | 22.354 | F | 0.500 | -0.697 |
| R07C | 2006 | 123 | 15 | 48 | 25.503 | F | 0.500 | 0.145  |
| O05C | 2006 | 123 | 15 | 48 | 24.699 | F | 0.500 | -0.481 |
| SN55 | 2006 | 123 | 15 | 48 | 21.850 | F | 0.500 | -0.453 |
| P05C | 2006 | 123 | 15 | 48 | 22.705 | F | 0.500 | -0.221 |

|      |      |     |    |        |          |            |         |        |       |
|------|------|-----|----|--------|----------|------------|---------|--------|-------|
| 2006 | 130  | 2   | 43 | 0.0997 | 52.51500 | -169.25600 | 18.0000 | 26     | 9.070 |
| S06C | 2006 | 130 | 2  | 55     | 53.319   | F          | 0.500   | -0.173 |       |
| JRSC | 2006 | 130 | 2  | 55     | 34.133   | F          | 0.500   | -1.553 |       |
| BNLO | 2006 | 130 | 2  | 55     | 38.050   | F          | 0.500   | -1.019 |       |
| CVS  | 2006 | 130 | 2  | 55     | 24.386   | F          | 0.500   | 0.003  |       |

|      |      |     |   |    |        |   |       |        |
|------|------|-----|---|----|--------|---|-------|--------|
| SAO  | 2006 | 130 | 2 | 55 | 48.674 | F | 0.500 | -0.713 |
| HOPS | 2006 | 130 | 2 | 55 | 13.623 | F | 0.500 | 1.196  |
| S04C | 2006 | 130 | 2 | 55 | 42.569 | F | 0.500 | -0.581 |
| DBO  | 2006 | 130 | 2 | 54 | 32.509 | F | 0.500 | -0.746 |
| FARB | 2006 | 130 | 2 | 55 | 23.496 | F | 0.500 | -2.004 |
| P01C | 2006 | 130 | 2 | 55 | 5.929  | F | 0.500 | 0.653  |
| PHL  | 2006 | 130 | 2 | 56 | 10.045 | F | 0.500 | -1.169 |
| V05C | 2006 | 130 | 2 | 56 | 12.787 | F | 0.500 | 0.333  |
| WENL | 2006 | 130 | 2 | 55 | 37.789 | F | 0.500 | -0.234 |
| PACP | 2006 | 130 | 2 | 55 | 47.962 | F | 0.500 | -0.625 |
| O01C | 2006 | 130 | 2 | 54 | 55.492 | F | 0.500 | 1.159  |
| U04C | 2006 | 130 | 2 | 55 | 59.093 | F | 0.500 | -0.557 |
| O03C | 2006 | 130 | 2 | 55 | 12.527 | F | 0.500 | -0.080 |
| BAK  | 2006 | 130 | 2 | 56 | 23.980 | F | 0.500 | -1.052 |
| MPP  | 2006 | 130 | 2 | 56 | 23.494 | F | 0.500 | -0.108 |
| GASB | 2006 | 130 | 2 | 55 | 11.006 | F | 0.500 | 1.292  |
| SLA  | 2006 | 130 | 2 | 56 | 35.762 | F | 0.500 | -0.780 |
| FMP  | 2006 | 130 | 2 | 56 | 47.367 | F | 0.500 | -1.505 |
| PKD  | 2006 | 130 | 2 | 56 | 5.549  | F | 0.500 | -0.422 |
| P05C | 2006 | 130 | 2 | 55 | 32.401 | F | 0.500 | -0.499 |
| R08A | 2006 | 130 | 2 | 56 | 5.722  | F | 0.500 | 0.642  |
| MNV  | 2006 | 130 | 2 | 56 | 4.190  | F | 0.500 | 0.289  |
| L09A | 2006 | 130 | 2 | 55 | 34.697 | F | 0.500 | -0.810 |
| M10A | 2006 | 130 | 2 | 55 | 49.843 | F | 0.500 | -0.523 |
| N07B | 2006 | 130 | 2 | 55 | 33.527 | F | 0.500 | -0.882 |
| WVOR | 2006 | 130 | 2 | 55 | 22.270 | F | 0.500 | -0.430 |
| N02C | 2006 | 130 | 2 | 54 | 53.926 | F | 0.500 | 0.933  |
| SHO  | 2006 | 130 | 2 | 56 | 45.817 | F | 0.500 | 0.303  |
| GRA  | 2006 | 130 | 2 | 56 | 25.989 | F | 0.500 | 1.234  |
| R04C | 2006 | 130 | 2 | 55 | 39.050 | F | 0.500 | -0.301 |
| BEK  | 2006 | 130 | 2 | 55 | 29.242 | F | 0.500 | -0.721 |
| SN48 | 2006 | 130 | 2 | 56 | 4.124  | F | 0.500 | 1.333  |
| Q08A | 2006 | 130 | 2 | 56 | 1.867  | F | 0.500 | 0.000  |
| SN28 | 2006 | 130 | 2 | 56 | 10.383 | F | 0.500 | 1.415  |
| O09A | 2006 | 130 | 2 | 55 | 55.835 | F | 0.500 | -0.633 |
| O07A | 2006 | 130 | 2 | 55 | 40.229 | F | 0.500 | -0.643 |
| Q09A | 2006 | 130 | 2 | 56 | 8.684  | F | 0.500 | -0.394 |
| N10A | 2006 | 130 | 2 | 55 | 57.267 | F | 0.500 | -0.545 |
| HUMO | 2006 | 130 | 2 | 54 | 40.672 | F | 0.500 | 0.461  |
| P06A | 2006 | 130 | 2 | 55 | 35.104 | F | 0.500 | -0.708 |
| GSC  | 2006 | 130 | 2 | 56 | 46.500 | F | 0.500 | -0.117 |
| HATC | 2006 | 130 | 2 | 55 | 10.985 | F | 0.500 | 0.391  |
| PIN  | 2006 | 130 | 2 | 54 | 50.092 | F | 0.500 | 0.062  |
| O08A | 2006 | 130 | 2 | 55 | 45.950 | F | 0.500 | -0.639 |
| M07A | 2006 | 130 | 2 | 55 | 26.650 | F | 0.500 | -0.390 |
| J03A | 2006 | 130 | 2 | 54 | 33.890 | F | 0.500 | 0.327  |
| S09A | 2006 | 130 | 2 | 56 | 20.028 | F | 0.500 | 0.634  |
| K06A | 2006 | 130 | 2 | 55 | 4.728  | F | 0.500 | 0.305  |
| ORV  | 2006 | 130 | 2 | 55 | 20.970 | F | 0.500 | -0.808 |
| SVD  | 2006 | 130 | 2 | 56 | 54.967 | F | 0.500 | -1.008 |
| M05C | 2006 | 130 | 2 | 55 | 9.368  | F | 0.500 | 0.685  |
| M03C | 2006 | 130 | 2 | 55 | 0.691  | F | 0.500 | 0.505  |
| EDW2 | 2006 | 130 | 2 | 56 | 39.337 | F | 0.500 | -0.567 |
| MPM  | 2006 | 130 | 2 | 56 | 33.570 | F | 0.500 | 0.449  |
| R07C | 2006 | 130 | 2 | 56 | 0.239  | F | 0.500 | 1.140  |
| CIA  | 2006 | 130 | 2 | 56 | 49.599 | F | 0.500 | -1.582 |
| O02C | 2006 | 130 | 2 | 55 | 5.294  | F | 0.500 | 1.284  |
| SN46 | 2006 | 130 | 2 | 56 | 4.782  | F | 0.500 | 1.267  |
| SN66 | 2006 | 130 | 2 | 55 | 55.892 | F | 0.500 | 0.219  |
| SN76 | 2006 | 130 | 2 | 55 | 52.696 | F | 0.500 | 0.485  |
| O06A | 2006 | 130 | 2 | 55 | 31.779 | F | 0.500 | -0.287 |
| SN67 | 2006 | 130 | 2 | 55 | 58.540 | F | 0.500 | 2.107  |
| RRX  | 2006 | 130 | 2 | 56 | 48.619 | F | 0.500 | -0.387 |



|      |      |     |   |    |        |   |       |        |
|------|------|-----|---|----|--------|---|-------|--------|
| OSI  | 2006 | 130 | 2 | 56 | 35.274 | F | 0.500 | -0.820 |
| N09A | 2006 | 130 | 2 | 55 | 46.517 | F | 0.500 | -0.717 |
| ELFS | 2006 | 130 | 2 | 55 | 19.893 | F | 0.500 | 0.548  |
| BBR  | 2006 | 130 | 2 | 56 | 55.339 | F | 0.500 | -1.020 |
| SN37 | 2006 | 130 | 2 | 56 | 8.041  | F | 0.500 | 1.693  |
| ISA  | 2006 | 130 | 2 | 56 | 25.427 | F | 0.500 | -2.299 |
| M06C | 2006 | 130 | 2 | 55 | 16.689 | F | 0.500 | 0.230  |
| MLAC | 2006 | 130 | 2 | 56 | 7.224  | F | 0.500 | 1.695  |
| HEC  | 2006 | 130 | 2 | 56 | 55.320 | F | 0.500 | -0.275 |
| TIN  | 2006 | 130 | 2 | 56 | 18.259 | F | 0.500 | 1.739  |
| MCCM | 2006 | 130 | 2 | 55 | 21.417 | F | 0.500 | -0.848 |
| J06A | 2006 | 130 | 2 | 55 | 2.040  | F | 0.500 | 0.501  |
| SN71 | 2006 | 130 | 2 | 55 | 49.323 | F | 0.500 | -1.028 |
| SN47 | 2006 | 130 | 2 | 56 | 5.673  | F | 0.500 | 2.588  |
| O05C | 2006 | 130 | 2 | 55 | 23.354 | F | 0.500 | -0.192 |
| SN51 | 2006 | 130 | 2 | 55 | 56.281 | F | 0.500 | -1.101 |
| S05C | 2006 | 130 | 2 | 55 | 52.677 | F | 0.500 | -1.284 |
| R06C | 2006 | 130 | 2 | 55 | 51.884 | F | 0.500 | 0.719  |
| P09A | 2006 | 130 | 2 | 56 | 2.389  | F | 0.500 | -0.435 |
| SN25 | 2006 | 130 | 2 | 56 | 10.706 | F | 0.500 | 1.265  |
| M02C | 2006 | 130 | 2 | 54 | 53.274 | F | 0.500 | 1.169  |
| RCT  | 2006 | 130 | 2 | 56 | 12.804 | F | 0.500 | -1.295 |
| I06A | 2006 | 130 | 2 | 54 | 55.244 | F | 0.500 | 0.290  |
| CWC  | 2006 | 130 | 2 | 56 | 24.301 | F | 0.500 | 0.343  |
| T06C | 2006 | 130 | 2 | 56 | 2.170  | F | 0.500 | -0.859 |
| SN85 | 2006 | 130 | 2 | 55 | 48.896 | F | 0.500 | 0.037  |
| DGR  | 2006 | 130 | 2 | 56 | 59.886 | F | 0.500 | -1.374 |
| PAS  | 2006 | 130 | 2 | 56 | 45.222 | F | 0.500 | -0.489 |
| SN21 | 2006 | 130 | 2 | 56 | 5.463  | F | 0.500 | -1.260 |
| CMB  | 2006 | 130 | 2 | 55 | 46.858 | F | 0.500 | 0.035  |
| SN54 | 2006 | 130 | 2 | 55 | 58.260 | F | 0.500 | 0.019  |
| LRL  | 2006 | 130 | 2 | 56 | 36.079 | F | 0.500 | -0.948 |
| SN44 | 2006 | 130 | 2 | 56 | 2.941  | F | 0.500 | 0.366  |
| VCS  | 2006 | 130 | 2 | 56 | 41.998 | F | 0.500 | -0.941 |
| MUR  | 2006 | 130 | 2 | 56 | 58.788 | F | 0.500 | -1.295 |
| HELL | 2006 | 130 | 2 | 56 | 12.049 | F | 0.500 | -0.783 |
| WCN  | 2006 | 130 | 2 | 55 | 40.630 | F | 0.500 | -0.273 |
| SN52 | 2006 | 130 | 2 | 55 | 58.045 | F | 0.500 | -0.696 |
| SN11 | 2006 | 130 | 2 | 56 | 8.421  | F | 0.500 | -1.260 |
| SN27 | 2006 | 130 | 2 | 56 | 13.096 | F | 0.500 | 3.539  |
| PLM  | 2006 | 130 | 2 | 57 | 5.016  | F | 0.500 | -0.903 |
| DEC  | 2006 | 130 | 2 | 56 | 42.984 | F | 0.500 | -0.256 |
| LAVA | 2006 | 130 | 2 | 55 | 36.293 | F | 0.500 | -0.340 |
| SN55 | 2006 | 130 | 2 | 55 | 59.026 | F | 0.500 | 0.404  |
| O04C | 2006 | 130 | 2 | 55 | 18.995 | F | 0.500 | 0.165  |
| SN62 | 2006 | 130 | 2 | 55 | 54.189 | F | 0.500 | -0.618 |
| SN26 | 2006 | 130 | 2 | 56 | 11.050 | F | 0.500 | 2.010  |
| SN23 | 2006 | 130 | 2 | 56 | 7.043  | F | 0.500 | 0.157  |
| WDC  | 2006 | 130 | 2 | 55 | 3.279  | F | 0.500 | 0.948  |
| CHF  | 2006 | 130 | 2 | 56 | 44.753 | F | 0.500 | -0.672 |
| KCC  | 2006 | 130 | 2 | 56 | 4.368  | F | 0.500 | 0.654  |
| SN15 | 2006 | 130 | 2 | 56 | 12.480 | F | 0.500 | 1.362  |
| YBH  | 2006 | 130 | 2 | 54 | 51.959 | F | 0.500 | 1.506  |
| SN16 | 2006 | 130 | 2 | 56 | 16.038 | F | 0.500 | 2.547  |
| SN73 | 2006 | 130 | 2 | 55 | 51.072 | F | 0.500 | -0.517 |
| SN74 | 2006 | 130 | 2 | 55 | 51.260 | F | 0.500 | -0.498 |
| SN53 | 2006 | 130 | 2 | 55 | 58.410 | F | 0.500 | -0.389 |
| JCS  | 2006 | 130 | 2 | 57 | 10.233 | F | 0.500 | -0.755 |
| S08C | 2006 | 130 | 2 | 56 | 15.098 | F | 0.500 | 1.977  |
| SN14 | 2006 | 130 | 2 | 56 | 11.828 | F | 0.500 | 0.845  |
| BFS  | 2006 | 130 | 2 | 56 | 48.629 | F | 0.500 | -1.015 |
| SN36 | 2006 | 130 | 2 | 56 | 8.753  | F | 0.500 | 2.071  |
| Q03C | 2006 | 130 | 2 | 55 | 26.828 | F | 0.500 | 1.126  |

|      |      |     |    |        |          |           |          |  |
|------|------|-----|----|--------|----------|-----------|----------|--|
| 2006 | 142  | 13  | 8  | 6.2762 | 54.27100 | 158.44701 | 197.0000 |  |
| OSI  | 2006 | 142 | 13 | 25     | 33.067 F | 0.500     | -0.204   |  |
| I06A | 2006 | 142 | 13 | 23     | 53.393 F | 0.500     | -1.582   |  |
| M08A | 2006 | 142 | 13 | 24     | 30.269 F | 0.500     | -1.354   |  |
| O02C | 2006 | 142 | 13 | 24     | 11.545 F | 0.500     | 0.727    |  |
| CVS  | 2006 | 142 | 13 | 24     | 31.266 F | 0.500     | 0.931    |  |
| ELFS | 2006 | 142 | 13 | 24     | 21.890 F | 0.500     | -0.146   |  |
| U04C | 2006 | 142 | 13 | 25     | 2.332 F  | 0.500     | 0.710    |  |
| Q04C | 2006 | 142 | 13 | 24     | 34.162 F | 0.500     | 0.561    |  |
| M09A | 2006 | 142 | 13 | 24     | 37.538 F | 0.500     | -0.971   |  |
| VES  | 2006 | 142 | 13 | 25     | 17.484 F | 0.500     | -1.318   |  |
| PIN  | 2006 | 142 | 13 | 23     | 50.256 F | 0.500     | -1.247   |  |
| ISA  | 2006 | 142 | 13 | 25     | 23.136 F | 0.500     | -1.865   |  |
| SMM  | 2006 | 142 | 13 | 25     | 17.700 F | 0.500     | 0.366    |  |
| HUMO | 2006 | 142 | 13 | 23     | 45.929 F | 0.500     | -0.796   |  |
| N02C | 2006 | 142 | 13 | 24     | 1.009 F  | 0.500     | 0.344    |  |
| PAS  | 2006 | 142 | 13 | 25     | 40.353 F | 0.500     | -1.143   |  |
| J03A | 2006 | 142 | 13 | 23     | 38.413 F | 0.500     | -1.147   |  |
| WENL | 2006 | 142 | 13 | 24     | 42.938 F | 0.500     | 0.545    |  |
| MOD  | 2006 | 142 | 13 | 24     | 11.774 F | 0.500     | -1.605   |  |
| SN57 | 2006 | 142 | 13 | 24     | 59.215 F | 0.500     | 0.882    |  |
| M03C | 2006 | 142 | 13 | 24     | 4.464 F  | 0.500     | -1.084   |  |
| GASB | 2006 | 142 | 13 | 24     | 17.590 F | 0.500     | 1.250    |  |
| YBH  | 2006 | 142 | 13 | 23     | 56.847 F | 0.500     | 0.122    |  |
| M07A | 2006 | 142 | 13 | 24     | 25.040 F | 0.500     | -1.278   |  |
| HOPS | 2006 | 142 | 13 | 24     | 21.390 F | 0.500     | 1.742    |  |
| R06C | 2006 | 142 | 13 | 24     | 51.313 F | 0.500     | -0.030   |  |
| SN46 | 2006 | 142 | 13 | 25     | 4.384 F  | 0.500     | 1.865    |  |
| P01C | 2006 | 142 | 13 | 24     | 14.763 F | 0.500     | 1.746    |  |
| M04C | 2006 | 142 | 13 | 24     | 2.033 F  | 0.500     | -0.940   |  |
| V04C | 2006 | 142 | 13 | 25     | 8.390 F  | 0.500     | 0.749    |  |
| L02A | 2006 | 142 | 13 | 23     | 46.001 F | 0.500     | -0.018   |  |
| M06C | 2006 | 142 | 13 | 24     | 17.452 F | 0.500     | -1.095   |  |
| ADO  | 2006 | 142 | 13 | 25     | 43.119 F | 0.500     | -0.139   |  |
| M05C | 2006 | 142 | 13 | 24     | 11.325 F | 0.500     | -0.799   |  |
| TIN  | 2006 | 142 | 13 | 25     | 15.082 F | 0.500     | 1.106    |  |
| FUR  | 2006 | 142 | 13 | 25     | 29.019 F | 0.500     | 0.244    |  |
| WVOR | 2006 | 142 | 13 | 24     | 18.766 F | 0.500     | -1.636   |  |
| WDC  | 2006 | 142 | 13 | 24     | 8.170 F  | 0.500     | -0.415   |  |
| L09A | 2006 | 142 | 13 | 24     | 30.264 F | 0.500     | -1.116   |  |
| RCT  | 2006 | 142 | 13 | 25     | 12.332 F | 0.500     | -0.795   |  |
| PHL  | 2006 | 142 | 13 | 25     | 12.390 F | 0.500     | 0.231    |  |
| GRA  | 2006 | 142 | 13 | 25     | 21.483 F | 0.500     | 1.084    |  |
| BFS  | 2006 | 142 | 13 | 25     | 44.515 F | 0.500     | -0.024   |  |
| SVD  | 2006 | 142 | 13 | 25     | 48.656 F | 0.500     | -1.107   |  |
| SN67 | 2006 | 142 | 13 | 24     | 56.183 F | 0.500     | 0.188    |  |
| Q09A | 2006 | 142 | 13 | 25     | 4.816 F  | 0.500     | 0.136    |  |
| FARB | 2006 | 142 | 13 | 24     | 31.876 F | 0.500     | -0.272   |  |
| M02C | 2006 | 142 | 13 | 23     | 59.438 F | 0.500     | 0.669    |  |
| SN26 | 2006 | 142 | 13 | 25     | 9.633 F  | 0.500     | 2.551    |  |
| SUTB | 2006 | 142 | 13 | 24     | 25.995 F | 0.500     | -0.998   |  |
| HEC  | 2006 | 142 | 13 | 25     | 48.482 F | 0.500     | 0.201    |  |
| DGR  | 2006 | 142 | 13 | 25     | 53.404 F | 0.500     | -1.095   |  |
| S04C | 2006 | 142 | 13 | 24     | 46.882 F | 0.500     | 0.131    |  |
| CWC  | 2006 | 142 | 13 | 25     | 21.119 F | 0.500     | 0.191    |  |
| SLA  | 2006 | 142 | 13 | 25     | 31.219 F | 0.500     | -0.460   |  |
| SHO  | 2006 | 142 | 13 | 25     | 39.199 F | 0.500     | 0.583    |  |
| R08A | 2006 | 142 | 13 | 25     | 2.950 F  | 0.500     | 0.450    |  |
| KCC  | 2006 | 142 | 13 | 25     | 3.700 F  | 0.500     | 0.364    |  |
| O07A | 2006 | 142 | 13 | 24     | 39.017 F | 0.500     | -0.936   |  |
| J02A | 2006 | 142 | 13 | 23     | 34.283 F | 0.500     | -0.790   |  |
| O05C | 2006 | 142 | 13 | 24     | 25.644 F | 0.500     | -1.052   |  |

|      |      |     |    |    |        |   |       |        |
|------|------|-----|----|----|--------|---|-------|--------|
| Q08A | 2006 | 142 | 13 | 24 | 58.936 | F | 0.500 | -0.155 |
| O06A | 2006 | 142 | 13 | 24 | 31.756 | F | 0.500 | -1.295 |
| N07B | 2006 | 142 | 13 | 24 | 32.188 | F | 0.500 | -1.303 |
| BBR  | 2006 | 142 | 13 | 25 | 49.244 | F | 0.500 | -0.657 |
| SN66 | 2006 | 142 | 13 | 24 | 55.795 | F | 0.500 | 0.167  |
| CIA  | 2006 | 142 | 13 | 25 | 46.075 | F | 0.500 | -0.811 |
| VTV  | 2006 | 142 | 13 | 25 | 43.516 | F | 0.500 | -0.185 |
| P05C | 2006 | 142 | 13 | 24 | 33.879 | F | 0.500 | -1.571 |
| SN16 | 2006 | 142 | 13 | 25 | 13.052 | F | 0.500 | 1.958  |
| SN47 | 2006 | 142 | 13 | 25 | 3.080  | F | 0.500 | 1.284  |
| TPH  | 2006 | 142 | 13 | 25 | 11.978 | F | 0.500 | 0.243  |
| SN28 | 2006 | 142 | 13 | 25 | 8.152  | F | 0.500 | 1.727  |
| SN76 | 2006 | 142 | 13 | 24 | 52.722 | F | 0.500 | 0.187  |
| SN37 | 2006 | 142 | 13 | 25 | 6.449  | F | 0.500 | 1.819  |
| R07C | 2006 | 142 | 13 | 24 | 59.145 | F | 0.500 | 0.678  |
| N08A | 2006 | 142 | 13 | 24 | 38.484 | F | 0.500 | -1.093 |
| O04C | 2006 | 142 | 13 | 24 | 21.889 | F | 0.500 | -0.397 |
| CHF  | 2006 | 142 | 13 | 25 | 41.093 | F | 0.500 | 0.051  |
| SN53 | 2006 | 142 | 13 | 24 | 58.955 | F | 0.500 | -0.285 |
| SN23 | 2006 | 142 | 13 | 25 | 6.404  | F | 0.500 | 0.066  |
| S05C | 2006 | 142 | 13 | 24 | 54.898 | F | 0.500 | -0.664 |
| BEK  | 2006 | 142 | 13 | 24 | 30.454 | F | 0.500 | -1.605 |
| MNV  | 2006 | 142 | 13 | 25 | 1.622  | F | 0.500 | 0.163  |
| GSC  | 2006 | 142 | 13 | 25 | 39.936 | F | 0.500 | -0.530 |
| SN44 | 2006 | 142 | 13 | 25 | 2.868  | F | 0.500 | 0.658  |
| LRL  | 2006 | 142 | 13 | 25 | 31.759 | F | 0.500 | -0.933 |
| SN48 | 2006 | 142 | 13 | 25 | 2.079  | F | 0.500 | 0.869  |
| SN15 | 2006 | 142 | 13 | 25 | 11.049 | F | 0.500 | 1.698  |
| PACP | 2006 | 142 | 13 | 24 | 52.142 | F | 0.500 | 0.325  |
| MUR  | 2006 | 142 | 13 | 25 | 52.904 | F | 0.500 | -0.715 |
| PLM  | 2006 | 142 | 13 | 25 | 58.440 | F | 0.500 | -0.244 |
| MPM  | 2006 | 142 | 13 | 25 | 28.820 | F | 0.500 | 0.092  |
| SN25 | 2006 | 142 | 13 | 25 | 9.521  | F | 0.500 | 1.617  |
| HELL | 2006 | 142 | 13 | 25 | 10.987 | F | 0.500 | -0.651 |
| SN12 | 2006 | 142 | 13 | 25 | 9.113  | F | 0.500 | -0.304 |
| SN27 | 2006 | 142 | 13 | 25 | 10.933 | F | 0.500 | 3.566  |
| TPNV | 2006 | 142 | 13 | 25 | 29.926 | F | 0.500 | 0.706  |
| SN73 | 2006 | 142 | 13 | 24 | 52.733 | F | 0.500 | -0.175 |
| SN36 | 2006 | 142 | 13 | 25 | 7.479  | F | 0.500 | 2.399  |
| SN84 | 2006 | 142 | 13 | 24 | 49.432 | F | 0.500 | -0.280 |
| LAVA | 2006 | 142 | 13 | 24 | 39.017 | F | 0.500 | -0.346 |
| ORV  | 2006 | 142 | 13 | 24 | 24.506 | F | 0.500 | -1.579 |
| WCN  | 2006 | 142 | 13 | 24 | 41.439 | F | 0.500 | -0.300 |
| S08C | 2006 | 142 | 13 | 25 | 12.902 | F | 0.500 | 2.353  |
| O08A | 2006 | 142 | 13 | 24 | 43.332 | F | 0.500 | -0.749 |
| P09A | 2006 | 142 | 13 | 24 | 58.463 | F | 0.500 | 0.149  |
| R04C | 2006 | 142 | 13 | 24 | 42.265 | F | 0.500 | -0.044 |
| SN11 | 2006 | 142 | 13 | 25 | 8.256  | F | 0.500 | -0.770 |
| SN71 | 2006 | 142 | 13 | 24 | 51.802 | F | 0.500 | -0.362 |
| SN95 | 2006 | 142 | 13 | 24 | 47.083 | F | 0.500 | -0.043 |
| SN38 | 2006 | 142 | 13 | 25 | 4.928  | F | 0.500 | 1.146  |
| VCS  | 2006 | 142 | 13 | 25 | 38.861 | F | 0.500 | 0.012  |
| SN85 | 2006 | 142 | 13 | 24 | 49.931 | F | 0.500 | -0.063 |
| SN65 | 2006 | 142 | 13 | 24 | 56.206 | F | 0.500 | 0.143  |
| SN14 | 2006 | 142 | 13 | 25 | 10.393 | F | 0.500 | 0.873  |
| SN54 | 2006 | 142 | 13 | 24 | 58.791 | F | 0.500 | 0.356  |
| CMB  | 2006 | 142 | 13 | 24 | 49.118 | F | 0.500 | 0.425  |
| T06C | 2006 | 142 | 13 | 25 | 3.051  | F | 0.500 | -0.296 |
| S09A | 2006 | 142 | 13 | 25 | 15.921 | F | 0.500 | 0.948  |
| SN51 | 2006 | 142 | 13 | 24 | 58.170 | F | 0.500 | -0.199 |
| SN55 | 2006 | 142 | 13 | 24 | 59.045 | F | 0.500 | 0.581  |
| S06C | 2006 | 142 | 13 | 24 | 54.406 | F | 0.500 | 0.034  |
| SN64 | 2006 | 142 | 13 | 24 | 56.388 | F | 0.500 | 0.098  |

|      |      |     |    |         |          |           |         |    |       |
|------|------|-----|----|---------|----------|-----------|---------|----|-------|
| 2006 | 173  | 10  | 53 | 13.2658 | 45.41700 | 149.34300 | 95.0000 | 28 | 1.696 |
| HUMO | 2006 | 173 | 11 | 11      | 16.729 F | 0.500     | 1.523   |    |       |
| SN84 | 2006 | 173 | 11 | 12      | 10.868 F | 0.500     | -0.214  |    |       |
| O10A | 2006 | 173 | 11 | 12      | 21.960 F | 0.500     | 0.592   |    |       |
| WCN  | 2006 | 173 | 11 | 12      | 4.757 F  | 0.500     | -0.397  |    |       |
| MLAC | 2006 | 173 | 11 | 12      | 26.224 F | 0.500     | 1.093   |    |       |
| GRA  | 2006 | 173 | 11 | 12      | 39.868 F | 0.500     | -0.552  |    |       |
| R06C | 2006 | 173 | 11 | 12      | 13.424 F | 0.500     | -0.079  |    |       |
| U10A | 2006 | 173 | 11 | 12      | 52.401 F | 0.500     | -0.045  |    |       |
| SN14 | 2006 | 173 | 11 | 12      | 29.164 F | 0.500     | -0.329  |    |       |
| U05C | 2006 | 173 | 11 | 12      | 25.198 F | 0.500     | 0.470   |    |       |
| RCT  | 2006 | 173 | 11 | 12      | 29.728 F | 0.500     | -1.830  |    |       |
| PLM  | 2006 | 173 | 11 | 13      | 11.357 F | 0.500     | -1.499  |    |       |
| SN57 | 2006 | 173 | 11 | 12      | 20.335 F | 0.500     | 0.398   |    |       |
| R04C | 2006 | 173 | 11 | 12      | 3.488 F  | 0.500     | -0.197  |    |       |
| Q09A | 2006 | 173 | 11 | 12      | 27.206 F | 0.500     | -0.525  |    |       |
| SN16 | 2006 | 173 | 11 | 12      | 32.073 F | 0.500     | 0.549   |    |       |
| OSI  | 2006 | 173 | 11 | 12      | 48.238 F | 0.500     | -0.747  |    |       |
| O07A | 2006 | 173 | 11 | 12      | 4.736 F  | 0.500     | -0.203  |    |       |
| S05C | 2006 | 173 | 11 | 12      | 14.529 F | 0.500     | -0.970  |    |       |
| SN67 | 2006 | 173 | 11 | 12      | 17.983 F | 0.500     | 0.185   |    |       |
| MPP  | 2006 | 173 | 11 | 12      | 39.168 F | 0.500     | 0.372   |    |       |
| S08C | 2006 | 173 | 11 | 12      | 32.207 F | 0.500     | 0.964   |    |       |
| N10A | 2006 | 173 | 11 | 12      | 18.631 F | 0.500     | 0.703   |    |       |
| MPM  | 2006 | 173 | 11 | 12      | 46.225 F | 0.500     | -1.004  |    |       |
| M08A | 2006 | 173 | 11 | 11      | 58.833 F | 0.500     | 0.016   |    |       |
| O06A | 2006 | 173 | 11 | 11      | 57.376 F | 0.500     | -0.515  |    |       |
| CMB  | 2006 | 173 | 11 | 12      | 10.239 F | 0.500     | 0.448   |    |       |
| O09A | 2006 | 173 | 11 | 12      | 18.011 F | 0.500     | 0.826   |    |       |
| R09A | 2006 | 173 | 11 | 12      | 32.836 F | 0.500     | -0.451  |    |       |
| CWC  | 2006 | 173 | 11 | 12      | 38.775 F | 0.500     | -1.089  |    |       |
| S09A | 2006 | 173 | 11 | 12      | 36.433 F | 0.500     | 0.213   |    |       |
| SN76 | 2006 | 173 | 11 | 12      | 14.448 F | 0.500     | 0.066   |    |       |
| DBO  | 2006 | 173 | 11 | 11      | 10.978 F | 0.500     | 1.564   |    |       |
| HEC  | 2006 | 173 | 11 | 13      | 3.810 F  | 0.500     | -1.211  |    |       |
| R08A | 2006 | 173 | 11 | 12      | 24.882 F | 0.500     | 0.271   |    |       |
| MUR  | 2006 | 173 | 11 | 13      | 6.205 F  | 0.500     | -1.859  |    |       |
| SN34 | 2006 | 173 | 11 | 12      | 25.305 F | 0.500     | -0.029  |    |       |
| J07A | 2006 | 173 | 11 | 11      | 38.297 F | 0.500     | 1.158   |    |       |
| LRL  | 2006 | 173 | 11 | 12      | 48.358 F | 0.500     | -1.782  |    |       |
| SN74 | 2006 | 173 | 11 | 12      | 13.511 F | 0.500     | -0.423  |    |       |
| BEK  | 2006 | 173 | 11 | 11      | 55.571 F | 0.500     | -0.743  |    |       |
| DGR  | 2006 | 173 | 11 | 13      | 7.339 F  | 0.500     | -1.740  |    |       |
| SN15 | 2006 | 173 | 11 | 12      | 29.943 F | 0.500     | 0.334   |    |       |
| SN27 | 2006 | 173 | 11 | 12      | 30.569 F | 0.500     | 2.278   |    |       |
| SN28 | 2006 | 173 | 11 | 12      | 28.772 F | 0.500     | 0.973   |    |       |
| SN65 | 2006 | 173 | 11 | 12      | 16.968 F | 0.500     | -0.348  |    |       |
| SN24 | 2006 | 173 | 11 | 12      | 26.573 F | 0.500     | -0.185  |    |       |
| ORV  | 2006 | 173 | 11 | 11      | 48.853 F | 0.500     | -0.736  |    |       |
| L05A | 2006 | 173 | 11 | 11      | 36.725 F | 0.500     | 0.773   |    |       |
| SN73 | 2006 | 173 | 11 | 12      | 13.406 F | 0.500     | -0.304  |    |       |
| P09A | 2006 | 173 | 11 | 12      | 22.431 F | 0.500     | -0.159  |    |       |
| KCC  | 2006 | 173 | 11 | 12      | 23.307 F | 0.500     | -0.157  |    |       |
| J02A | 2006 | 173 | 11 | 11      | 6.719 F  | 0.500     | 1.854   |    |       |
| O04C | 2006 | 173 | 11 | 11      | 47.347 F | 0.500     | 0.169   |    |       |
| K07A | 2006 | 173 | 11 | 11      | 44.070 F | 0.500     | 1.256   |    |       |
| J06A | 2006 | 173 | 11 | 11      | 33.011 F | 0.500     | 1.074   |    |       |
| I03A | 2006 | 173 | 11 | 11      | 4.084 F  | 0.500     | 1.599   |    |       |
| SN64 | 2006 | 173 | 11 | 12      | 17.240 F | 0.500     | -0.071  |    |       |
| L09A | 2006 | 173 | 11 | 12      | 0.330 F  | 0.500     | 0.735   |    |       |
| Q08A | 2006 | 173 | 11 | 12      | 21.348 F | 0.500     | -0.756  |    |       |
| LAVA | 2006 | 173 | 11 | 12      | 1.397 F  | 0.500     | -0.278  |    |       |

|      |      |     |    |    |        |   |       |        |
|------|------|-----|----|----|--------|---|-------|--------|
| SN53 | 2006 | 173 | 11 | 12 | 18.952 | F | 0.500 | -0.699 |
| SN47 | 2006 | 173 | 11 | 12 | 23.874 | F | 0.500 | 0.671  |
| VCS  | 2006 | 173 | 11 | 12 | 54.033 | F | 0.500 | -0.539 |
| M07A | 2006 | 173 | 11 | 11 | 53.410 | F | 0.500 | 0.078  |
| SN11 | 2006 | 173 | 11 | 12 | 26.654 | F | 0.500 | -1.458 |
| SN37 | 2006 | 173 | 11 | 12 | 26.858 | F | 0.500 | 1.066  |
| SN44 | 2006 | 173 | 11 | 12 | 22.683 | F | 0.500 | 0.021  |
| SN25 | 2006 | 173 | 11 | 12 | 28.678 | F | 0.500 | 0.410  |
| J03A | 2006 | 173 | 11 | 11 | 11.096 | F | 0.500 | 1.660  |
| SN54 | 2006 | 173 | 11 | 12 | 19.104 | F | 0.500 | -0.150 |
| L04A | 2006 | 173 | 11 | 11 | 27.849 | F | 0.500 | 1.066  |
| T06C | 2006 | 173 | 11 | 12 | 21.975 | F | 0.500 | -0.882 |
| SN48 | 2006 | 173 | 11 | 12 | 23.258 | F | 0.500 | 0.300  |
| SN38 | 2006 | 173 | 11 | 12 | 25.968 | F | 0.500 | 0.611  |
| SN63 | 2006 | 173 | 11 | 12 | 16.689 | F | 0.500 | -0.403 |
| WVOR | 2006 | 173 | 11 | 11 | 50.069 | F | 0.500 | 0.913  |
| P05C | 2006 | 173 | 11 | 11 | 57.631 | F | 0.500 | -1.046 |
| SN23 | 2006 | 173 | 11 | 12 | 25.328 | F | 0.500 | -0.841 |
| SN52 | 2006 | 173 | 11 | 12 | 18.623 | F | 0.500 | -0.755 |
| SN12 | 2006 | 173 | 11 | 12 | 27.890 | F | 0.500 | -1.058 |
| S06C | 2006 | 173 | 11 | 12 | 15.240 | F | 0.500 | -0.073 |
| SN51 | 2006 | 173 | 11 | 12 | 17.677 | F | 0.500 | -0.533 |
| L08A | 2006 | 173 | 11 | 11 | 53.878 | F | 0.500 | 0.668  |
| TIN  | 2006 | 173 | 11 | 12 | 33.881 | F | 0.500 | -0.059 |

|      |      |     |    |         |           |            |         |        |         |
|------|------|-----|----|---------|-----------|------------|---------|--------|---------|
| 2006 | 188  | 7   | 25 | 20.9372 | -15.24400 | -173.61000 | 35.0000 | 29     | -51.593 |
| SN55 | 2006 | 188 | 7  | 46      | 17.748    | F          | 0.500   | 0.503  |         |
| CIA  | 2006 | 188 | 7  | 45      | 54.363    | F          | 0.500   | -0.865 |         |
| O01C | 2006 | 188 | 7  | 46      | 0.731     | F          | 0.500   | 0.568  |         |
| BDM  | 2006 | 188 | 7  | 45      | 58.258    | F          | 0.500   | -0.127 |         |
| J08A | 2006 | 188 | 7  | 46      | 56.300    | F          | 0.500   | -1.191 |         |
| PIN  | 2006 | 188 | 7  | 46      | 44.010    | F          | 0.500   | -1.276 |         |
| SLA  | 2006 | 188 | 7  | 46      | 20.506    | F          | 0.500   | 0.808  |         |
| S04C | 2006 | 188 | 7  | 45      | 58.848    | F          | 0.500   | -0.574 |         |
| Q03C | 2006 | 188 | 7  | 46      | 2.797     | F          | 0.500   | 0.832  |         |
| P10A | 2006 | 188 | 7  | 46      | 47.564    | F          | 0.500   | -0.890 |         |
| R10A | 2006 | 188 | 7  | 46      | 41.436    | F          | 0.500   | -0.178 |         |
| O09A | 2006 | 188 | 7  | 46      | 45.844    | F          | 0.500   | -0.570 |         |
| L09A | 2006 | 188 | 7  | 46      | 53.257    | F          | 0.500   | -1.256 |         |
| M09A | 2006 | 188 | 7  | 46      | 51.307    | F          | 0.500   | -1.090 |         |
| K06A | 2006 | 188 | 7  | 46      | 41.360    | F          | 0.500   | -1.062 |         |
| N10A | 2006 | 188 | 7  | 46      | 53.547    | F          | 0.500   | -1.029 |         |
| J07A | 2006 | 188 | 7  | 46      | 51.057    | F          | 0.500   | -1.189 |         |
| K08A | 2006 | 188 | 7  | 46      | 52.595    | F          | 0.500   | -1.056 |         |
| I06A | 2006 | 188 | 7  | 46      | 49.395    | F          | 0.500   | -0.775 |         |
| O10A | 2006 | 188 | 7  | 46      | 51.272    | F          | 0.500   | -0.765 |         |
| DBO  | 2006 | 188 | 7  | 46      | 25.315    | F          | 0.500   | -0.112 |         |
| Q09A | 2006 | 188 | 7  | 46      | 38.573    | F          | 0.500   | 0.201  |         |
| J06A | 2006 | 188 | 7  | 46      | 44.586    | F          | 0.500   | -1.565 |         |
| O08A | 2006 | 188 | 7  | 46      | 40.416    | F          | 0.500   | -0.196 |         |
| K07A | 2006 | 188 | 7  | 46      | 47.351    | F          | 0.500   | -0.905 |         |
| WVOR | 2006 | 188 | 7  | 46      | 49.726    | F          | 0.500   | -0.876 |         |
| L08A | 2006 | 188 | 7  | 46      | 50.097    | F          | 0.500   | -1.042 |         |
| L07A | 2006 | 188 | 7  | 46      | 42.684    | F          | 0.500   | -0.866 |         |
| K04A | 2006 | 188 | 7  | 46      | 31.118    | F          | 0.500   | -0.605 |         |
| P09A | 2006 | 188 | 7  | 46      | 42.241    | F          | 0.500   | -0.801 |         |
| N09A | 2006 | 188 | 7  | 46      | 47.861    | F          | 0.500   | -0.449 |         |
| HEC  | 2006 | 188 | 7  | 46      | 19.603    | F          | 0.500   | -0.740 |         |
| ELFS | 2006 | 188 | 7  | 46      | 24.324    | F          | 0.500   | -0.551 |         |
| MNRC | 2006 | 188 | 7  | 46      | 1.588     | F          | 0.500   | 0.680  |         |
| ARV  | 2006 | 188 | 7  | 46      | 3.220     | F          | 0.500   | 0.683  |         |
| OSI  | 2006 | 188 | 7  | 46      | 0.247     | F          | 0.500   | -0.228 |         |
| GRA  | 2006 | 188 | 7  | 46      | 25.218    | F          | 0.500   | -0.474 |         |

|      |      |     |   |    |        |   |       |        |
|------|------|-----|---|----|--------|---|-------|--------|
| GSC  | 2006 | 188 | 7 | 46 | 20.059 | F | 0.500 | 0.445  |
| GASB | 2006 | 188 | 7 | 46 | 6.155  | F | 0.500 | 1.659  |
| MUR  | 2006 | 188 | 7 | 46 | 6.724  | F | 0.500 | 0.496  |
| O07A | 2006 | 188 | 7 | 46 | 34.454 | F | 0.500 | -0.304 |
| PLM  | 2006 | 188 | 7 | 46 | 7.635  | F | 0.500 | 0.074  |
| ADO  | 2006 | 188 | 7 | 46 | 9.765  | F | 0.500 | -0.506 |
| RRX  | 2006 | 188 | 7 | 46 | 14.784 | F | 0.500 | -0.666 |
| SUTB | 2006 | 188 | 7 | 46 | 8.091  | F | 0.500 | 0.131  |
| J03A | 2006 | 188 | 7 | 46 | 29.315 | F | 0.500 | 0.732  |
| M05C | 2006 | 188 | 7 | 46 | 26.726 | F | 0.500 | -0.341 |
| N07B | 2006 | 188 | 7 | 46 | 37.141 | F | 0.500 | -0.726 |
| N08A | 2006 | 188 | 7 | 46 | 42.809 | F | 0.500 | -0.854 |
| M06C | 2006 | 188 | 7 | 46 | 29.602 | F | 0.500 | -0.923 |
| Q07A | 2006 | 188 | 7 | 46 | 27.326 | F | 0.500 | 0.081  |
| DGR  | 2006 | 188 | 7 | 46 | 8.771  | F | 0.500 | 0.856  |
| MWC  | 2006 | 188 | 7 | 46 | 2.794  | F | 0.500 | -0.699 |
| SN14 | 2006 | 188 | 7 | 46 | 16.260 | F | 0.500 | -0.306 |
| FUR  | 2006 | 188 | 7 | 46 | 26.083 | F | 0.500 | 0.201  |
| M04C | 2006 | 188 | 7 | 46 | 25.385 | F | 0.500 | 0.202  |
| L04A | 2006 | 188 | 7 | 46 | 27.459 | F | 0.500 | -0.169 |
| MLAC | 2006 | 188 | 7 | 46 | 20.158 | F | 0.500 | 1.156  |
| EDW2 | 2006 | 188 | 7 | 46 | 7.985  | F | 0.500 | 0.307  |
| O05C | 2006 | 188 | 7 | 46 | 18.693 | F | 0.500 | -0.221 |
| R04C | 2006 | 188 | 7 | 46 | 6.909  | F | 0.500 | -0.303 |
| TPNV | 2006 | 188 | 7 | 46 | 33.910 | F | 0.500 | -0.032 |
| PAS  | 2006 | 188 | 7 | 46 | 1.178  | F | 0.500 | -0.413 |
| O04C | 2006 | 188 | 7 | 46 | 19.865 | F | 0.500 | -0.482 |
| VCS  | 2006 | 188 | 7 | 46 | 3.964  | F | 0.500 | -0.259 |
| Q08A | 2006 | 188 | 7 | 46 | 33.378 | F | 0.500 | 0.185  |
| N02C | 2006 | 188 | 7 | 46 | 9.257  | F | 0.500 | 0.629  |
| SN46 | 2006 | 188 | 7 | 46 | 20.914 | F | 0.500 | 1.103  |
| SN66 | 2006 | 188 | 7 | 46 | 19.442 | F | 0.500 | 0.433  |
| Q04C | 2006 | 188 | 7 | 46 | 7.884  | F | 0.500 | -0.015 |
| SHO  | 2006 | 188 | 7 | 46 | 27.203 | F | 0.500 | -0.121 |
| U10A | 2006 | 188 | 7 | 46 | 30.320 | F | 0.500 | 0.326  |
| VTV  | 2006 | 188 | 7 | 46 | 10.580 | F | 0.500 | -0.342 |
| LRL  | 2006 | 188 | 7 | 46 | 15.096 | F | 0.500 | 1.161  |
| YBH  | 2006 | 188 | 7 | 46 | 20.215 | F | 0.500 | 1.138  |
| SN25 | 2006 | 188 | 7 | 46 | 18.786 | F | 0.500 | 0.316  |
| SVD  | 2006 | 188 | 7 | 46 | 10.458 | F | 0.500 | 0.314  |
| SN36 | 2006 | 188 | 7 | 46 | 22.251 | F | 0.500 | 1.421  |
| S05C | 2006 | 188 | 7 | 46 | 5.384  | F | 0.500 | -0.368 |
| R06C | 2006 | 188 | 7 | 46 | 20.688 | F | 0.500 | 0.555  |
| S09A | 2006 | 188 | 7 | 46 | 30.817 | F | 0.500 | -0.575 |
| CHF  | 2006 | 188 | 7 | 46 | 3.890  | F | 0.500 | -0.346 |
| SN34 | 2006 | 188 | 7 | 46 | 15.950 | F | 0.500 | 0.056  |
| SN24 | 2006 | 188 | 7 | 46 | 15.748 | F | 0.500 | 0.039  |
| SN54 | 2006 | 188 | 7 | 46 | 15.296 | F | 0.500 | 0.565  |
| R07C | 2006 | 188 | 7 | 46 | 21.432 | F | 0.500 | 1.017  |
| O02C | 2006 | 188 | 7 | 46 | 9.004  | F | 0.500 | 1.287  |
| TIN  | 2006 | 188 | 7 | 46 | 19.553 | F | 0.500 | -0.156 |
| SN71 | 2006 | 188 | 7 | 46 | 6.470  | F | 0.500 | -0.440 |
| CMB  | 2006 | 188 | 7 | 46 | 10.073 | F | 0.500 | 0.186  |
| RCT  | 2006 | 188 | 7 | 46 | 6.109  | F | 0.500 | -0.874 |
| BBR  | 2006 | 188 | 7 | 46 | 12.966 | F | 0.500 | 0.172  |
| M07A | 2006 | 188 | 7 | 46 | 39.320 | F | 0.500 | -1.292 |
| O06A | 2006 | 188 | 7 | 46 | 27.668 | F | 0.500 | -0.542 |
| R09A | 2006 | 188 | 7 | 46 | 35.256 | F | 0.500 | -0.547 |
| M03C | 2006 | 188 | 7 | 46 | 19.492 | F | 0.500 | -0.480 |
| SN76 | 2006 | 188 | 7 | 46 | 19.284 | F | 0.500 | 0.333  |
| SN48 | 2006 | 188 | 7 | 46 | 25.438 | F | 0.500 | 0.947  |
| SN28 | 2006 | 188 | 7 | 46 | 26.470 | F | 0.500 | 0.850  |
| SN26 | 2006 | 188 | 7 | 46 | 21.792 | F | 0.500 | 0.696  |

|      |      |     |   |    |        |   |       |        |
|------|------|-----|---|----|--------|---|-------|--------|
| SN15 | 2006 | 188 | 7 | 46 | 18.792 | F | 0.500 | 0.251  |
| CWC  | 2006 | 188 | 7 | 46 | 17.041 | F | 0.500 | -0.175 |
| SN56 | 2006 | 188 | 7 | 46 | 19.548 | F | 0.500 | 0.534  |
| SN44 | 2006 | 188 | 7 | 46 | 15.118 | F | 0.500 | 0.323  |
| SN53 | 2006 | 188 | 7 | 46 | 12.003 | F | 0.500 | 0.031  |
| SN51 | 2006 | 188 | 7 | 46 | 6.762  | F | 0.500 | -0.234 |
| BEK  | 2006 | 188 | 7 | 46 | 22.426 | F | 0.500 | -0.147 |
| T06C | 2006 | 188 | 7 | 46 | 7.569  | F | 0.500 | -0.584 |
| BFS  | 2006 | 188 | 7 | 46 | 6.495  | F | 0.500 | 0.043  |
| I03A | 2006 | 188 | 7 | 46 | 31.329 | F | 0.500 | 0.233  |
| M02C | 2006 | 188 | 7 | 46 | 16.969 | F | 0.500 | 1.257  |
| SN47 | 2006 | 188 | 7 | 46 | 23.487 | F | 0.500 | 1.431  |
| MPM  | 2006 | 188 | 7 | 46 | 20.225 | F | 0.500 | 1.091  |
| L02A | 2006 | 188 | 7 | 46 | 17.238 | F | 0.500 | 1.045  |
| SN67 | 2006 | 188 | 7 | 46 | 22.256 | F | 0.500 | 1.252  |
| SN85 | 2006 | 188 | 7 | 46 | 15.261 | F | 0.500 | 0.175  |
| R08A | 2006 | 188 | 7 | 46 | 29.499 | F | 0.500 | 0.761  |
| SN64 | 2006 | 188 | 7 | 46 | 14.865 | F | 0.500 | 0.215  |
| S06C | 2006 | 188 | 7 | 46 | 13.156 | F | 0.500 | -0.022 |
| R05C | 2006 | 188 | 7 | 46 | 17.058 | F | 0.500 | 0.002  |
| P06A | 2006 | 188 | 7 | 46 | 24.867 | F | 0.500 | 0.402  |
| SN84 | 2006 | 188 | 7 | 46 | 12.718 | F | 0.500 | -0.100 |
| SN73 | 2006 | 188 | 7 | 46 | 10.258 | F | 0.500 | -0.376 |
| WDC  | 2006 | 188 | 7 | 46 | 12.375 | F | 0.500 | 0.358  |
| SN12 | 2006 | 188 | 7 | 46 | 12.074 | F | 0.500 | -0.746 |
| HELL | 2006 | 188 | 7 | 46 | 10.448 | F | 0.500 | -0.949 |
| LAVA | 2006 | 188 | 7 | 46 | 12.033 | F | 0.500 | -0.064 |
| SN57 | 2006 | 188 | 7 | 46 | 22.465 | F | 0.500 | 1.194  |
| K02A | 2006 | 188 | 7 | 46 | 22.191 | F | 0.500 | 1.005  |
| HUMO | 2006 | 188 | 7 | 46 | 24.054 | F | 0.500 | 0.476  |
| SN74 | 2006 | 188 | 7 | 46 | 12.738 | F | 0.500 | -0.322 |
| ORV  | 2006 | 188 | 7 | 46 | 12.277 | F | 0.500 | 0.208  |
| SN63 | 2006 | 188 | 7 | 46 | 12.413 | F | 0.500 | -0.057 |
| SN23 | 2006 | 188 | 7 | 46 | 12.447 | F | 0.500 | -0.639 |
| SN38 | 2006 | 188 | 7 | 46 | 26.529 | F | 0.500 | 1.351  |
| SN52 | 2006 | 188 | 7 | 46 | 9.398  | F | 0.500 | -0.125 |
| SN43 | 2006 | 188 | 7 | 46 | 12.889 | F | 0.500 | 0.023  |
| SN37 | 2006 | 188 | 7 | 46 | 23.580 | F | 0.500 | 1.180  |
| WCN  | 2006 | 188 | 7 | 46 | 24.216 | F | 0.500 | 1.213  |
| S08C | 2006 | 188 | 7 | 46 | 23.707 | F | 0.500 | 0.444  |
| SN16 | 2006 | 188 | 7 | 46 | 21.892 | F | 0.500 | 0.303  |

|      |      |     |    |        |          |            |         |        |       |
|------|------|-----|----|--------|----------|------------|---------|--------|-------|
| 2006 | 189  | 20  | 40 | 2.3121 | 51.21400 | -179.31200 | 22.0000 | 30     | 1.332 |
| SMM  | 2006 | 189 | 20 | 54     | 50.579   | F          | 0.500   | 0.341  |       |
| PIN  | 2006 | 189 | 20 | 53     | 27.563   | F          | 0.500   | -0.807 |       |
| ADO  | 2006 | 189 | 20 | 55     | 19.758   | F          | 0.500   | -0.815 |       |
| Q03C | 2006 | 189 | 20 | 54     | 4.302    | F          | 0.500   | 3.043  |       |
| GRA  | 2006 | 189 | 20 | 54     | 59.532   | F          | 0.500   | 0.950  |       |
| U10A | 2006 | 189 | 20 | 55     | 12.754   | F          | 0.500   | -0.302 |       |
| R10A | 2006 | 189 | 20 | 54     | 55.718   | F          | 0.500   | -1.164 |       |
| O03C | 2006 | 189 | 20 | 53     | 49.411   | F          | 0.500   | 0.283  |       |
| SHO  | 2006 | 189 | 20 | 55     | 18.085   | F          | 0.500   | -0.317 |       |
| M10A | 2006 | 189 | 20 | 54     | 24.837   | F          | 0.500   | -1.774 |       |
| SDD  | 2006 | 189 | 20 | 55     | 26.668   | F          | 0.500   | -0.868 |       |
| O01C | 2006 | 189 | 20 | 53     | 32.978   | F          | 0.500   | 1.905  |       |
| L05A | 2006 | 189 | 20 | 53     | 43.196   | F          | 0.500   | 0.107  |       |
| BAK  | 2006 | 189 | 20 | 54     | 57.169   | F          | 0.500   | -0.681 |       |
| R04C | 2006 | 189 | 20 | 54     | 14.758   | F          | 0.500   | 0.228  |       |
| HATC | 2006 | 189 | 20 | 53     | 47.918   | F          | 0.500   | 0.381  |       |
| MNRC | 2006 | 189 | 20 | 53     | 58.299   | F          | 0.500   | 2.998  |       |
| I03A | 2006 | 189 | 20 | 53     | 4.643    | F          | 0.500   | 0.327  |       |
| MCCM | 2006 | 189 | 20 | 53     | 57.117   | F          | 0.500   | -0.374 |       |
| ELFS | 2006 | 189 | 20 | 53     | 56.627   | F          | 0.500   | 0.557  |       |

|      |      |     |    |    |        |   |       |        |
|------|------|-----|----|----|--------|---|-------|--------|
| K06A | 2006 | 189 | 20 | 53 | 42.124 | F | 0.500 | -0.067 |
| M08A | 2006 | 189 | 20 | 54 | 9.165  | F | 0.500 | -1.478 |
| J07A | 2006 | 189 | 20 | 53 | 45.926 | F | 0.500 | -0.211 |
| RPV  | 2006 | 189 | 20 | 55 | 18.592 | F | 0.500 | -0.621 |
| O10A | 2006 | 189 | 20 | 54 | 36.619 | F | 0.500 | -0.854 |
| U05C | 2006 | 189 | 20 | 54 | 40.288 | F | 0.500 | 0.870  |
| P06A | 2006 | 189 | 20 | 54 | 11.243 | F | 0.500 | -0.562 |
| ARV  | 2006 | 189 | 20 | 55 | 2.065  | F | 0.500 | -0.359 |
| HOPS | 2006 | 189 | 20 | 53 | 49.832 | F | 0.500 | 1.508  |
| CVS  | 2006 | 189 | 20 | 54 | 0.573  | F | 0.500 | 0.842  |
| M09A | 2006 | 189 | 20 | 54 | 17.639 | F | 0.500 | -1.574 |
| GSC  | 2006 | 189 | 20 | 55 | 18.800 | F | 0.500 | -0.345 |
| SVD  | 2006 | 189 | 20 | 55 | 26.643 | F | 0.500 | -1.010 |
| SCZ2 | 2006 | 189 | 20 | 55 | 5.060  | F | 0.500 | -0.654 |
| M07A | 2006 | 189 | 20 | 54 | 2.818  | F | 0.500 | -1.047 |
| I06A | 2006 | 189 | 20 | 53 | 32.722 | F | 0.500 | -0.447 |
| P01C | 2006 | 189 | 20 | 53 | 43.153 | F | 0.500 | 1.632  |
| OSI  | 2006 | 189 | 20 | 55 | 8.103  | F | 0.500 | -0.185 |
| PAS  | 2006 | 189 | 20 | 55 | 17.122 | F | 0.500 | -0.398 |
| S04C | 2006 | 189 | 20 | 54 | 18.398 | F | 0.500 | 0.575  |
| Q09A | 2006 | 189 | 20 | 54 | 43.086 | F | 0.500 | -0.971 |
| J03A | 2006 | 189 | 20 | 53 | 12.406 | F | 0.500 | 0.258  |
| GASB | 2006 | 189 | 20 | 53 | 48.355 | F | 0.500 | 2.288  |
| V05C | 2006 | 189 | 20 | 54 | 46.595 | F | 0.500 | 0.880  |
| K04A | 2006 | 189 | 20 | 53 | 30.227 | F | 0.500 | 0.256  |
| WENL | 2006 | 189 | 20 | 54 | 13.283 | F | 0.500 | 0.479  |
| FMP  | 2006 | 189 | 20 | 55 | 19.470 | F | 0.500 | -0.831 |
| L02A | 2006 | 189 | 20 | 53 | 17.561 | F | 0.500 | 1.484  |
| SN65 | 2006 | 189 | 20 | 54 | 30.260 | F | 0.500 | -0.384 |
| BDM  | 2006 | 189 | 20 | 54 | 9.779  | F | 0.500 | 1.040  |
| L09A | 2006 | 189 | 20 | 54 | 10.657 | F | 0.500 | -1.639 |
| SNCC | 2006 | 189 | 20 | 55 | 13.536 | F | 0.500 | -0.345 |
| K07A | 2006 | 189 | 20 | 53 | 51.588 | F | 0.500 | -0.710 |
| WVOR | 2006 | 189 | 20 | 53 | 58.666 | F | 0.500 | -1.247 |
| P10A | 2006 | 189 | 20 | 54 | 42.677 | F | 0.500 | -1.059 |
| LGU  | 2006 | 189 | 20 | 55 | 9.121  | F | 0.500 | -0.740 |
| J06A | 2006 | 189 | 20 | 53 | 39.478 | F | 0.500 | -0.008 |
| DEC  | 2006 | 189 | 20 | 55 | 14.730 | F | 0.500 | -0.412 |
| V04C | 2006 | 189 | 20 | 54 | 39.480 | F | 0.500 | 0.397  |
| FUR  | 2006 | 189 | 20 | 55 | 7.852  | F | 0.500 | 0.169  |
| EDW2 | 2006 | 189 | 20 | 55 | 11.619 | F | 0.500 | -0.638 |
| Q04C | 2006 | 189 | 20 | 54 | 6.007  | F | 0.500 | 0.745  |
| R08A | 2006 | 189 | 20 | 54 | 40.145 | F | 0.500 | 0.227  |
| M06C | 2006 | 189 | 20 | 53 | 53.470 | F | 0.500 | -0.022 |
| L04A | 2006 | 189 | 20 | 53 | 32.369 | F | 0.500 | 0.267  |
| M04C | 2006 | 189 | 20 | 53 | 36.325 | F | 0.500 | 0.382  |
| BBR  | 2006 | 189 | 20 | 55 | 27.068 | F | 0.500 | -1.080 |
| SN44 | 2006 | 189 | 20 | 54 | 37.174 | F | 0.500 | 0.138  |
| K08A | 2006 | 189 | 20 | 53 | 57.974 | F | 0.500 | -0.857 |
| CMB  | 2006 | 189 | 20 | 54 | 22.250 | F | 0.500 | 0.472  |
| MPP  | 2006 | 189 | 20 | 54 | 56.554 | F | 0.500 | 0.464  |
| LAVA | 2006 | 189 | 20 | 54 | 12.069 | F | 0.500 | -0.094 |
| SN28 | 2006 | 189 | 20 | 54 | 44.581 | F | 0.500 | 1.052  |
| R09A | 2006 | 189 | 20 | 54 | 49.749 | F | 0.500 | -0.685 |
| SLA  | 2006 | 189 | 20 | 55 | 8.959  | F | 0.500 | -0.614 |
| K02A | 2006 | 189 | 20 | 53 | 13.072 | F | 0.500 | 0.849  |
| O09A | 2006 | 189 | 20 | 54 | 31.271 | F | 0.500 | -0.942 |
| SN57 | 2006 | 189 | 20 | 54 | 34.929 | F | 0.500 | 0.869  |
| PACP | 2006 | 189 | 20 | 54 | 22.951 | F | 0.500 | 0.089  |
| J08A | 2006 | 189 | 20 | 53 | 53.397 | F | 0.500 | -0.457 |
| ISA  | 2006 | 189 | 20 | 54 | 58.609 | F | 0.500 | -2.123 |
| DGR  | 2006 | 189 | 20 | 55 | 31.309 | F | 0.500 | -1.251 |
| U04C | 2006 | 189 | 20 | 54 | 33.695 | F | 0.500 | 0.316  |



|      |      |     |    |    |        |   |       |        |
|------|------|-----|----|----|--------|---|-------|--------|
| HUMO | 2006 | 189 | 20 | 53 | 19.002 | F | 0.500 | 0.599  |
| RCT  | 2006 | 189 | 20 | 54 | 46.434 | F | 0.500 | -1.206 |
| L08A | 2006 | 189 | 20 | 54 | 3.396  | F | 0.500 | -1.262 |
| SN67 | 2006 | 189 | 20 | 54 | 31.935 | F | 0.500 | 0.512  |
| PKD  | 2006 | 189 | 20 | 54 | 39.354 | F | 0.500 | -0.011 |
| S09A | 2006 | 189 | 20 | 54 | 53.736 | F | 0.500 | 0.050  |
| SN46 | 2006 | 189 | 20 | 54 | 39.249 | F | 0.500 | 1.134  |
| L07A | 2006 | 189 | 20 | 53 | 56.475 | F | 0.500 | -0.724 |
| BEK  | 2006 | 189 | 20 | 54 | 5.472  | F | 0.500 | -0.688 |
| ORV  | 2006 | 189 | 20 | 53 | 57.547 | F | 0.500 | -0.388 |
| N10A | 2006 | 189 | 20 | 54 | 32.270 | F | 0.500 | -1.400 |
| MLAC | 2006 | 189 | 20 | 54 | 41.675 | F | 0.500 | 1.644  |
| SN38 | 2006 | 189 | 20 | 54 | 41.472 | F | 0.500 | 0.891  |
| Q08A | 2006 | 189 | 20 | 54 | 36.433 | F | 0.500 | -0.604 |
| O07A | 2006 | 189 | 20 | 54 | 16.061 | F | 0.500 | -0.928 |
| HAST | 2006 | 189 | 20 | 54 | 25.266 | F | 0.500 | -0.747 |
| M02C | 2006 | 189 | 20 | 53 | 31.196 | F | 0.500 | 1.610  |
| SN66 | 2006 | 189 | 20 | 54 | 30.594 | F | 0.500 | -0.036 |
| SN76 | 2006 | 189 | 20 | 54 | 27.497 | F | 0.500 | 0.199  |
| CIA  | 2006 | 189 | 20 | 55 | 21.167 | F | 0.500 | -1.202 |
| N02C | 2006 | 189 | 20 | 53 | 31.737 | F | 0.500 | 1.578  |
| SN48 | 2006 | 189 | 20 | 54 | 38.453 | F | 0.500 | 0.833  |
| O04C | 2006 | 189 | 20 | 53 | 55.601 | F | 0.500 | 0.169  |
| MUR  | 2006 | 189 | 20 | 55 | 30.272 | F | 0.500 | -1.085 |
| BFS  | 2006 | 189 | 20 | 55 | 20.710 | F | 0.500 | -0.750 |
| O02C | 2006 | 189 | 20 | 53 | 42.726 | F | 0.500 | 2.019  |
| P05C | 2006 | 189 | 20 | 54 | 7.984  | F | 0.500 | -0.791 |
| P09A | 2006 | 189 | 20 | 54 | 37.205 | F | 0.500 | -1.022 |
| R07C | 2006 | 189 | 20 | 54 | 34.537 | F | 0.500 | 0.591  |
| SN47 | 2006 | 189 | 20 | 54 | 38.850 | F | 0.500 | 1.044  |
| SN71 | 2006 | 189 | 20 | 54 | 24.681 | F | 0.500 | -0.361 |
| SN52 | 2006 | 189 | 20 | 54 | 32.774 | F | 0.500 | -0.369 |
| HEC  | 2006 | 189 | 20 | 55 | 27.207 | F | 0.500 | -0.519 |
| MWC  | 2006 | 189 | 20 | 55 | 17.378 | F | 0.500 | -0.839 |
| S05C | 2006 | 189 | 20 | 54 | 27.842 | F | 0.500 | -0.576 |
| M05C | 2006 | 189 | 20 | 53 | 46.454 | F | 0.500 | 0.573  |
| R06C | 2006 | 189 | 20 | 54 | 26.635 | F | 0.500 | 0.276  |
| SUTB | 2006 | 189 | 20 | 53 | 58.523 | F | 0.500 | 0.418  |
| O05C | 2006 | 189 | 20 | 53 | 59.410 | F | 0.500 | -0.459 |
| WCN  | 2006 | 189 | 20 | 54 | 16.346 | F | 0.500 | -0.303 |
| CHF  | 2006 | 189 | 20 | 55 | 16.841 | F | 0.500 | -0.517 |
| N09A | 2006 | 189 | 20 | 54 | 21.929 | F | 0.500 | -1.481 |
| PLM  | 2006 | 189 | 20 | 55 | 36.090 | F | 0.500 | -0.898 |
| TIN  | 2006 | 189 | 20 | 54 | 51.572 | F | 0.500 | 1.052  |
| O06A | 2006 | 189 | 20 | 54 | 7.705  | F | 0.500 | -0.647 |
| SN37 | 2006 | 189 | 20 | 54 | 42.330 | F | 0.500 | 1.395  |
| MPM  | 2006 | 189 | 20 | 55 | 6.431  | F | 0.500 | 0.103  |
| SN56 | 2006 | 189 | 20 | 54 | 34.356 | F | 0.500 | 0.223  |
| N08A | 2006 | 189 | 20 | 54 | 17.024 | F | 0.500 | -1.485 |
| RRX  | 2006 | 189 | 20 | 55 | 20.790 | F | 0.500 | -0.446 |
| N07B | 2006 | 189 | 20 | 54 | 9.678  | F | 0.500 | -1.211 |
| JCS  | 2006 | 189 | 20 | 55 | 41.220 | F | 0.500 | -0.578 |
| R05C | 2006 | 189 | 20 | 54 | 19.024 | F | 0.500 | -0.090 |
| M03C | 2006 | 189 | 20 | 53 | 38.144 | F | 0.500 | 0.646  |
| SN51 | 2006 | 189 | 20 | 54 | 31.218 | F | 0.500 | -0.516 |
| SN26 | 2006 | 189 | 20 | 54 | 45.212 | F | 0.500 | 1.772  |
| T06C | 2006 | 189 | 20 | 54 | 36.540 | F | 0.500 | -0.628 |
| YBH  | 2006 | 189 | 20 | 53 | 29.665 | F | 0.500 | 1.546  |
| SN54 | 2006 | 189 | 20 | 54 | 33.023 | F | 0.500 | 0.113  |
| SN84 | 2006 | 189 | 20 | 54 | 23.155 | F | 0.500 | -0.082 |
| O08A | 2006 | 189 | 20 | 54 | 21.406 | F | 0.500 | -1.213 |
| SN27 | 2006 | 189 | 20 | 54 | 47.098 | F | 0.500 | 3.113  |
| HELL | 2006 | 189 | 20 | 54 | 45.654 | F | 0.500 | -1.007 |

|      |      |     |    |    |        |   |       |        |
|------|------|-----|----|----|--------|---|-------|--------|
| CWC  | 2006 | 189 | 20 | 54 | 57.569 | F | 0.500 | 0.071  |
| LRL  | 2006 | 189 | 20 | 55 | 8.671  | F | 0.500 | -1.131 |
| SN14 | 2006 | 189 | 20 | 54 | 45.774 | F | 0.500 | 0.653  |
| SN64 | 2006 | 189 | 20 | 54 | 30.533 | F | 0.500 | -0.066 |
| SN11 | 2006 | 189 | 20 | 54 | 42.556 | F | 0.500 | -0.989 |
| SN73 | 2006 | 189 | 20 | 54 | 26.267 | F | 0.500 | -0.109 |
| SN53 | 2006 | 189 | 20 | 54 | 33.049 | F | 0.500 | -0.280 |
| SN25 | 2006 | 189 | 20 | 54 | 44.765 | F | 0.500 | 1.032  |
| SN16 | 2006 | 189 | 20 | 54 | 49.862 | F | 0.500 | 2.165  |
| SN36 | 2006 | 189 | 20 | 54 | 43.115 | F | 0.500 | 1.932  |
| SN74 | 2006 | 189 | 20 | 54 | 26.302 | F | 0.500 | -0.342 |
| SN34 | 2006 | 189 | 20 | 54 | 40.780 | F | 0.500 | 0.651  |
| SN24 | 2006 | 189 | 20 | 54 | 42.552 | F | 0.500 | 0.646  |
| SN23 | 2006 | 189 | 20 | 54 | 41.030 | F | 0.500 | -0.034 |
| SN15 | 2006 | 189 | 20 | 54 | 46.452 | F | 0.500 | 1.112  |
| SN43 | 2006 | 189 | 20 | 54 | 35.995 | F | 0.500 | -0.136 |
| WDC  | 2006 | 189 | 20 | 53 | 40.338 | F | 0.500 | 1.070  |
| SN12 | 2006 | 189 | 20 | 54 | 44.029 | F | 0.500 | -0.409 |
| S06C | 2006 | 189 | 20 | 54 | 28.342 | F | 0.500 | 0.055  |
| SN63 | 2006 | 189 | 20 | 54 | 29.959 | F | 0.500 | -0.378 |
| S08C | 2006 | 189 | 20 | 54 | 49.228 | F | 0.500 | 1.811  |

|      |      |     |   |        |          |           |         |        |       |
|------|------|-----|---|--------|----------|-----------|---------|--------|-------|
| 2006 | 232  | 3   | 1 | 7.9500 | 49.82300 | 156.41499 | 26.0000 | 31     | 5.540 |
| SN85 | 2006 | 232 | 3 | 19     | 0.822    | F         | 0.500   | 0.110  |       |
| EDW2 | 2006 | 232 | 3 | 19     | 43.680   | F         | 0.500   | -0.849 |       |
| O10A | 2006 | 232 | 3 | 19     | 10.696   | F         | 0.500   | 0.998  |       |
| LRL  | 2006 | 232 | 3 | 19     | 40.733   | F         | 0.500   | -1.300 |       |
| DGR  | 2006 | 232 | 3 | 20     | 1.398    | F         | 0.500   | -1.261 |       |
| R04C | 2006 | 232 | 3 | 18     | 52.716   | F         | 0.500   | 0.136  |       |
| J06A | 2006 | 232 | 3 | 18     | 17.247   | F         | 0.500   | 0.208  |       |
| MUR  | 2006 | 232 | 3 | 20     | 0.073    | F         | 0.500   | -1.576 |       |
| SNC8 | 2006 | 232 | 3 | 18     | 49.269   | F         | 0.500   | -0.666 |       |
| BFS  | 2006 | 232 | 3 | 19     | 52.037   | F         | 0.500   | -0.850 |       |
| TPH  | 2006 | 232 | 3 | 19     | 23.305   | F         | 0.500   | -0.106 |       |
| Q09A | 2006 | 232 | 3 | 19     | 17.449   | F         | 0.500   | 0.448  |       |
| L07A | 2006 | 232 | 3 | 18     | 33.906   | F         | 0.500   | 0.189  |       |
| O09A | 2006 | 232 | 3 | 19     | 6.361    | F         | 0.500   | 0.925  |       |
| R08A | 2006 | 232 | 3 | 19     | 14.846   | F         | 0.500   | 0.793  |       |
| O06A | 2006 | 232 | 3 | 18     | 44.979   | F         | 0.500   | -0.483 |       |
| S08C | 2006 | 232 | 3 | 19     | 23.648   | F         | 0.500   | 2.301  |       |
| SNG7 | 2006 | 232 | 3 | 18     | 35.240   | F         | 0.500   | -0.249 |       |
| SNC3 | 2006 | 232 | 3 | 18     | 47.569   | F         | 0.500   | 0.815  |       |
| SN24 | 2006 | 232 | 3 | 19     | 17.742   | F         | 0.500   | 0.870  |       |
| VCS  | 2006 | 232 | 3 | 19     | 46.472   | F         | 0.500   | -0.730 |       |
| S05C | 2006 | 232 | 3 | 19     | 4.718    | F         | 0.500   | -0.575 |       |
| R09A | 2006 | 232 | 3 | 19     | 23.228   | F         | 0.500   | 0.189  |       |
| M07A | 2006 | 232 | 3 | 18     | 40.164   | F         | 0.500   | 0.062  |       |
| SN12 | 2006 | 232 | 3 | 19     | 18.985   | F         | 0.500   | -0.350 |       |
| L08A | 2006 | 232 | 3 | 18     | 39.693   | F         | 0.500   | 0.092  |       |
| SN43 | 2006 | 232 | 3 | 19     | 11.852   | F         | 0.500   | -0.037 |       |
| SN34 | 2006 | 232 | 3 | 19     | 16.145   | F         | 0.500   | 0.823  |       |
| SNA7 | 2006 | 232 | 3 | 18     | 55.210   | F         | 0.500   | 0.335  |       |
| O07A | 2006 | 232 | 3 | 18     | 52.620   | F         | 0.500   | -0.126 |       |
| SN93 | 2006 | 232 | 3 | 18     | 57.004   | F         | 0.500   | 0.853  |       |
| I09A | 2006 | 232 | 3 | 18     | 30.366   | F         | 0.500   | 1.193  |       |
| ORV  | 2006 | 232 | 3 | 18     | 36.376   | F         | 0.500   | -0.881 |       |
| K09A | 2006 | 232 | 3 | 18     | 40.023   | F         | 0.500   | -0.060 |       |
| J08A | 2006 | 232 | 3 | 18     | 29.947   | F         | 0.500   | 1.096  |       |
| S09A | 2006 | 232 | 3 | 19     | 27.203   | F         | 0.500   | 0.845  |       |
| SN65 | 2006 | 232 | 3 | 19     | 6.957    | F         | 0.500   | 0.233  |       |
| SND8 | 2006 | 232 | 3 | 18     | 46.280   | F         | 0.500   | -0.491 |       |
| SNE4 | 2006 | 232 | 3 | 18     | 40.739   | F         | 0.500   | -0.207 |       |
| K07A | 2006 | 232 | 3 | 18     | 28.766   | F         | 0.500   | 0.176  |       |

|      |      |     |   |    |        |   |       |        |
|------|------|-----|---|----|--------|---|-------|--------|
| SNG5 | 2006 | 232 | 3 | 18 | 34.820 | F | 0.500 | -0.806 |
| Q08A | 2006 | 232 | 3 | 19 | 11.191 | F | 0.500 | 0.042  |
| SND4 | 2006 | 232 | 3 | 18 | 44.372 | F | 0.500 | 0.097  |
| SNE5 | 2006 | 232 | 3 | 18 | 40.579 | F | 0.500 | -0.977 |
| N06A | 2006 | 232 | 3 | 18 | 40.177 | F | 0.500 | -0.276 |
| SNC4 | 2006 | 232 | 3 | 18 | 48.005 | F | 0.500 | 0.339  |
| SNA3 | 2006 | 232 | 3 | 18 | 53.872 | F | 0.500 | 0.401  |
| R07C | 2006 | 232 | 3 | 19 | 10.073 | F | 0.500 | 0.666  |
| SN95 | 2006 | 232 | 3 | 18 | 57.953 | F | 0.500 | 0.214  |
| SNC5 | 2006 | 232 | 3 | 18 | 47.563 | F | 0.500 | -0.077 |
| SNF6 | 2006 | 232 | 3 | 18 | 38.853 | F | 0.500 | -0.773 |
| P09A | 2006 | 232 | 3 | 19 | 11.972 | F | 0.500 | 0.679  |
| SNE6 | 2006 | 232 | 3 | 18 | 42.354 | F | 0.500 | -0.970 |
| SNC7 | 2006 | 232 | 3 | 18 | 47.816 | F | 0.500 | -0.725 |
| SNB9 | 2006 | 232 | 3 | 18 | 54.557 | F | 0.500 | 0.394  |
| SNB5 | 2006 | 232 | 3 | 18 | 51.041 | F | 0.500 | -0.075 |
| CMB  | 2006 | 232 | 3 | 18 | 59.566 | F | 0.500 | 0.572  |
| SNA5 | 2006 | 232 | 3 | 18 | 54.493 | F | 0.500 | -0.244 |
| N09A | 2006 | 232 | 3 | 18 | 57.277 | F | 0.500 | 0.109  |
| SNB6 | 2006 | 232 | 3 | 18 | 52.797 | F | 0.500 | -0.327 |
| O08A | 2006 | 232 | 3 | 18 | 57.532 | F | 0.500 | 0.253  |
| SN63 | 2006 | 232 | 3 | 19 | 6.548  | F | 0.500 | -0.123 |
| T06C | 2006 | 232 | 3 | 19 | 12.706 | F | 0.500 | -0.342 |
| SN84 | 2006 | 232 | 3 | 19 | 0.193  | F | 0.500 | -0.033 |
| SND5 | 2006 | 232 | 3 | 18 | 44.404 | F | 0.500 | -0.516 |
| R05C | 2006 | 232 | 3 | 18 | 56.317 | F | 0.500 | 0.142  |
| SN96 | 2006 | 232 | 3 | 18 | 58.623 | F | 0.500 | 0.254  |
| SN86 | 2006 | 232 | 3 | 19 | 0.447  | F | 0.500 | 0.211  |
| P05C | 2006 | 232 | 3 | 18 | 46.156 | F | 0.500 | -0.612 |
| S06C | 2006 | 232 | 3 | 19 | 4.807  | F | 0.500 | 0.047  |
| SNA4 | 2006 | 232 | 3 | 18 | 54.210 | F | 0.500 | 0.251  |
| SN64 | 2006 | 232 | 3 | 19 | 6.863  | F | 0.500 | 0.072  |
| N08A | 2006 | 232 | 3 | 18 | 53.069 | F | 0.500 | -0.155 |
| SN74 | 2006 | 232 | 3 | 19 | 3.224  | F | 0.500 | -0.030 |
| LAVA | 2006 | 232 | 3 | 18 | 50.298 | F | 0.500 | 0.127  |
| JCS  | 2006 | 232 | 3 | 20 | 10.238 | F | 0.500 | -0.704 |

|      |      |     |    |         |          |           |         |        |       |
|------|------|-----|----|---------|----------|-----------|---------|--------|-------|
| 2006 | 236  | 21  | 50 | 39.8541 | 51.14800 | 157.52200 | 43.0000 | 32     | 3.204 |
| BDM  | 2006 | 236 | 22 | 8       | 2.341    | F         | 0.500   | 1.193  |       |
| P08A | 2006 | 236 | 22 | 8       | 16.308   | F         | 0.500   | 1.055  |       |
| MNRC | 2006 | 236 | 22 | 7       | 51.652   | F         | 0.500   | 2.970  |       |
| I03A | 2006 | 236 | 22 | 6       | 57.669   | F         | 0.500   | -0.142 |       |
| P10A | 2006 | 236 | 22 | 8       | 28.920   | F         | 0.500   | 0.635  |       |
| O01C | 2006 | 236 | 22 | 7       | 29.109   | F         | 0.500   | 2.708  |       |
| Q03C | 2006 | 236 | 22 | 7       | 56.827   | F         | 0.500   | 2.854  |       |
| Q07A | 2006 | 236 | 22 | 8       | 16.256   | F         | 0.500   | -0.034 |       |
| HOPS | 2006 | 236 | 22 | 7       | 44.876   | F         | 0.500   | 2.293  |       |
| GSC  | 2006 | 236 | 22 | 9       | 3.006    | F         | 0.500   | -0.581 |       |
| SNCC | 2006 | 236 | 22 | 9       | 0.775    | F         | 0.500   | -0.514 |       |
| SCZ2 | 2006 | 236 | 22 | 8       | 52.698   | F         | 0.500   | -0.898 |       |
| L02A | 2006 | 236 | 22 | 7       | 11.821   | F         | 0.500   | 1.014  |       |
| PKD  | 2006 | 236 | 22 | 8       | 29.427   | F         | 0.500   | 0.074  |       |
| DJJ  | 2006 | 236 | 22 | 9       | 0.449    | F         | 0.500   | -1.153 |       |
| SHO  | 2006 | 236 | 22 | 9       | 2.442    | F         | 0.500   | 0.199  |       |
| J03A | 2006 | 236 | 22 | 7       | 5.330    | F         | 0.500   | -0.102 |       |
| BNLO | 2006 | 236 | 22 | 8       | 5.870    | F         | 0.500   | -0.218 |       |
| SBC  | 2006 | 236 | 22 | 8       | 49.109   | F         | 0.500   | 0.038  |       |
| N02C | 2006 | 236 | 22 | 7       | 26.094   | F         | 0.500   | 1.398  |       |
| P07A | 2006 | 236 | 22 | 8       | 10.685   | F         | 0.500   | 0.077  |       |
| ARV  | 2006 | 236 | 22 | 8       | 48.799   | F         | 0.500   | -0.890 |       |
| O02C | 2006 | 236 | 22 | 7       | 36.300   | F         | 0.500   | 1.697  |       |
| TOV  | 2006 | 236 | 22 | 8       | 57.230   | F         | 0.500   | -1.210 |       |
| V03C | 2006 | 236 | 22 | 8       | 23.064   | F         | 0.500   | -0.066 |       |

|      |      |     |    |   |        |   |       |        |
|------|------|-----|----|---|--------|---|-------|--------|
| ELFS | 2006 | 236 | 22 | 7 | 47.225 | F | 0.500 | 0.352  |
| GRA  | 2006 | 236 | 22 | 8 | 45.048 | F | 0.500 | 0.795  |
| DBO  | 2006 | 236 | 22 | 7 | 5.293  | F | 0.500 | -0.322 |
| U10A | 2006 | 236 | 22 | 8 | 57.817 | F | 0.500 | 0.730  |
| PIN  | 2006 | 236 | 22 | 7 | 18.054 | F | 0.500 | -0.291 |
| HATC | 2006 | 236 | 22 | 7 | 39.714 | F | 0.500 | 0.281  |
| DEC  | 2006 | 236 | 22 | 9 | 0.553  | F | 0.500 | -0.822 |
| FMP  | 2006 | 236 | 22 | 9 | 5.080  | F | 0.500 | -1.119 |
| L05A | 2006 | 236 | 22 | 7 | 33.732 | F | 0.500 | -0.070 |
| PAS  | 2006 | 236 | 22 | 9 | 2.070  | F | 0.500 | -1.409 |
| VES  | 2006 | 236 | 22 | 8 | 39.450 | F | 0.500 | -1.932 |
| M03C | 2006 | 236 | 22 | 7 | 30.076 | F | 0.500 | -0.226 |
| JRSC | 2006 | 236 | 22 | 8 | 2.936  | F | 0.500 | -0.189 |
| M06C | 2006 | 236 | 22 | 7 | 43.595 | F | 0.500 | -0.234 |
| SUTB | 2006 | 236 | 22 | 7 | 50.120 | F | 0.500 | -0.447 |
| CWC  | 2006 | 236 | 22 | 8 | 44.355 | F | 0.500 | 0.166  |
| M04C | 2006 | 236 | 22 | 7 | 28.426 | F | 0.500 | 0.246  |
| P01C | 2006 | 236 | 22 | 7 | 38.552 | F | 0.500 | 2.402  |
| T05C | 2006 | 236 | 22 | 8 | 21.207 | F | 0.500 | 1.354  |
| R04C | 2006 | 236 | 22 | 8 | 5.458  | F | 0.500 | -0.151 |
| K04A | 2006 | 236 | 22 | 7 | 21.652 | F | 0.500 | -0.099 |
| FARB | 2006 | 236 | 22 | 7 | 54.171 | F | 0.500 | -0.112 |
| HAST | 2006 | 236 | 22 | 8 | 17.433 | F | 0.500 | -0.130 |
| I06A | 2006 | 236 | 22 | 7 | 21.387 | F | 0.500 | -0.698 |
| Q04C | 2006 | 236 | 22 | 7 | 57.647 | F | 0.500 | 0.571  |
| SLA  | 2006 | 236 | 22 | 8 | 54.190 | F | 0.500 | -0.755 |
| J02A | 2006 | 236 | 22 | 7 | 0.739  | F | 0.500 | 0.004  |
| MLAC | 2006 | 236 | 22 | 8 | 30.256 | F | 0.500 | 2.223  |
| V05C | 2006 | 236 | 22 | 8 | 35.703 | F | 0.500 | 0.933  |
| LGU  | 2006 | 236 | 22 | 8 | 55.789 | F | 0.500 | -1.308 |
| U05C | 2006 | 236 | 22 | 8 | 30.005 | F | 0.500 | 1.095  |
| YBH  | 2006 | 236 | 22 | 7 | 22.850 | F | 0.500 | 1.271  |
| BEK  | 2006 | 236 | 22 | 7 | 55.600 | F | 0.500 | -0.943 |
| HEC  | 2006 | 236 | 22 | 9 | 11.217 | F | 0.500 | -0.115 |
| CIA  | 2006 | 236 | 22 | 9 | 7.386  | F | 0.500 | -0.953 |
| SNC7 | 2006 | 236 | 22 | 8 | 0.279  | F | 0.500 | -0.975 |
| L04A | 2006 | 236 | 22 | 7 | 24.282 | F | 0.500 | 0.026  |
| P06A | 2006 | 236 | 22 | 8 | 1.202  | F | 0.500 | -0.258 |
| ISA  | 2006 | 236 | 22 | 8 | 45.683 | F | 0.500 | -2.005 |
| OSI  | 2006 | 236 | 22 | 8 | 54.878 | F | 0.500 | -0.387 |
| SNC3 | 2006 | 236 | 22 | 8 | 0.554  | F | 0.500 | 0.869  |
| SVD  | 2006 | 236 | 22 | 9 | 10.662 | F | 0.500 | -1.462 |
| M02C | 2006 | 236 | 22 | 7 | 24.915 | F | 0.500 | 1.565  |
| V04C | 2006 | 236 | 22 | 8 | 30.139 | F | 0.500 | 0.748  |
| SMM  | 2006 | 236 | 22 | 8 | 39.310 | F | 0.500 | 0.074  |
| M05C | 2006 | 236 | 22 | 7 | 37.486 | F | 0.500 | 0.237  |
| ORV  | 2006 | 236 | 22 | 7 | 48.943 | F | 0.500 | -1.033 |
| S04C | 2006 | 236 | 22 | 8 | 9.767  | F | 0.500 | 0.344  |
| SNG5 | 2006 | 236 | 22 | 7 | 47.392 | F | 0.500 | -0.905 |
| RRX  | 2006 | 236 | 22 | 9 | 5.624  | F | 0.500 | -0.180 |
| ADO  | 2006 | 236 | 22 | 9 | 5.240  | F | 0.500 | -0.472 |
| SN45 | 2006 | 236 | 22 | 8 | 27.011 | F | 0.500 | 1.353  |
| O10A | 2006 | 236 | 22 | 8 | 22.686 | F | 0.500 | 0.767  |
| SNC4 | 2006 | 236 | 22 | 8 | 0.684  | F | 0.500 | 0.145  |
| M08A | 2006 | 236 | 22 | 7 | 57.270 | F | 0.500 | -0.501 |
| R06C | 2006 | 236 | 22 | 8 | 15.716 | F | 0.500 | 0.364  |
| J07A | 2006 | 236 | 22 | 7 | 34.123 | F | 0.500 | 0.182  |
| Q09A | 2006 | 236 | 22 | 8 | 30.105 | F | 0.500 | 0.451  |
| TIN  | 2006 | 236 | 22 | 8 | 38.316 | F | 0.500 | 0.758  |
| DGR  | 2006 | 236 | 22 | 9 | 15.347 | F | 0.500 | -1.303 |
| K05A | 2006 | 236 | 22 | 7 | 27.610 | F | 0.500 | 0.191  |
| MPP  | 2006 | 236 | 22 | 8 | 45.206 | F | 0.500 | 0.563  |
| M09A | 2006 | 236 | 22 | 8 | 4.776  | F | 0.500 | -0.153 |

|      |      |     |    |   |        |   |       |        |
|------|------|-----|----|---|--------|---|-------|--------|
| SND4 | 2006 | 236 | 22 | 7 | 57.012 | F | 0.500 | -0.104 |
| PHL  | 2006 | 236 | 22 | 8 | 33.586 | F | 0.500 | -0.332 |
| LAVA | 2006 | 236 | 22 | 8 | 2.988  | F | 0.500 | -0.068 |
| BFS  | 2006 | 236 | 22 | 9 | 6.130  | F | 0.500 | -0.622 |
| K06A | 2006 | 236 | 22 | 7 | 31.462 | F | 0.500 | -0.237 |
| I08A | 2006 | 236 | 22 | 7 | 35.093 | F | 0.500 | 0.181  |
| SN43 | 2006 | 236 | 22 | 8 | 25.128 | F | 0.500 | 0.081  |
| SN14 | 2006 | 236 | 22 | 8 | 33.727 | F | 0.500 | 0.771  |
| MPM  | 2006 | 236 | 22 | 8 | 51.858 | F | 0.500 | -0.171 |
| SNA3 | 2006 | 236 | 22 | 8 | 6.714  | F | 0.500 | 0.265  |
| BMN  | 2006 | 236 | 22 | 8 | 15.082 | F | 0.500 | -0.344 |
| S05C | 2006 | 236 | 22 | 8 | 17.919 | F | 0.500 | -0.604 |
| SNB5 | 2006 | 236 | 22 | 8 | 3.747  | F | 0.500 | -0.216 |
| Q08A | 2006 | 236 | 22 | 8 | 23.931 | F | 0.500 | 0.104  |
| SNB7 | 2006 | 236 | 22 | 8 | 5.094  | F | 0.500 | -0.285 |
| O04C | 2006 | 236 | 22 | 7 | 46.909 | F | 0.500 | 0.101  |
| SNA4 | 2006 | 236 | 22 | 8 | 6.907  | F | 0.500 | 0.014  |
| SNC5 | 2006 | 236 | 22 | 8 | 0.229  | F | 0.500 | -0.217 |
| SN93 | 2006 | 236 | 22 | 8 | 9.803  | F | 0.500 | 0.620  |
| I09A | 2006 | 236 | 22 | 7 | 41.296 | F | 0.500 | 0.792  |
| RCT  | 2006 | 236 | 22 | 8 | 34.705 | F | 0.500 | -1.199 |
| SAO  | 2006 | 236 | 22 | 8 | 15.368 | F | 0.500 | 0.379  |
| LRL  | 2006 | 236 | 22 | 8 | 54.401 | F | 0.500 | -1.189 |
| SNE4 | 2006 | 236 | 22 | 7 | 53.335 | F | 0.500 | -0.419 |
| SN34 | 2006 | 236 | 22 | 8 | 29.499 | F | 0.500 | 1.029  |
| SND5 | 2006 | 236 | 22 | 7 | 56.935 | F | 0.500 | -0.765 |
| O05C | 2006 | 236 | 22 | 7 | 50.499 | F | 0.500 | -0.535 |
| SN87 | 2006 | 236 | 22 | 8 | 13.233 | F | 0.500 | 0.353  |
| VCS  | 2006 | 236 | 22 | 9 | 0.584  | F | 0.500 | -0.447 |
| WVOR | 2006 | 236 | 22 | 7 | 46.645 | F | 0.500 | -0.426 |
| R09A | 2006 | 236 | 22 | 8 | 36.283 | F | 0.500 | 0.446  |
| MWC  | 2006 | 236 | 22 | 9 | 2.952  | F | 0.500 | -1.130 |
| SNE7 | 2006 | 236 | 22 | 7 | 53.212 | F | 0.500 | -0.920 |
| J05A | 2006 | 236 | 22 | 7 | 20.171 | F | 0.500 | 0.280  |
| BBR  | 2006 | 236 | 22 | 9 | 11.251 | F | 0.500 | -1.176 |
| PACP | 2006 | 236 | 22 | 8 | 14.592 | F | 0.500 | 0.385  |
| M10A | 2006 | 236 | 22 | 8 | 11.087 | F | 0.500 | 0.286  |
| SN24 | 2006 | 236 | 22 | 8 | 30.969 | F | 0.500 | 0.921  |
| SNG7 | 2006 | 236 | 22 | 7 | 47.581 | F | 0.500 | -0.446 |
| O09A | 2006 | 236 | 22 | 8 | 18.366 | F | 0.500 | 0.635  |
| SNC8 | 2006 | 236 | 22 | 8 | 1.817  | F | 0.500 | -0.768 |
| SNF6 | 2006 | 236 | 22 | 7 | 51.309 | F | 0.500 | -0.981 |
| T06C | 2006 | 236 | 22 | 8 | 26.007 | F | 0.500 | -0.332 |
| CHF  | 2006 | 236 | 22 | 9 | 2.818  | F | 0.500 | -0.345 |
| J06A | 2006 | 236 | 22 | 7 | 28.267 | F | 0.500 | -0.395 |
| PLM  | 2006 | 236 | 22 | 9 | 19.730 | F | 0.500 | -1.017 |
| SND8 | 2006 | 236 | 22 | 7 | 58.590 | F | 0.500 | -0.793 |
| SN12 | 2006 | 236 | 22 | 8 | 32.166 | F | 0.500 | -0.446 |
| SNE6 | 2006 | 236 | 22 | 7 | 54.850 | F | 0.500 | -1.175 |
| N06A | 2006 | 236 | 22 | 7 | 52.214 | F | 0.500 | -0.524 |
| R08A | 2006 | 236 | 22 | 8 | 27.732 | F | 0.500 | 0.845  |
| SN84 | 2006 | 236 | 22 | 8 | 13.159 | F | 0.500 | -0.072 |
| SNA7 | 2006 | 236 | 22 | 8 | 7.827  | F | 0.500 | 0.185  |
| SNA5 | 2006 | 236 | 22 | 8 | 7.237  | F | 0.500 | -0.386 |
| M07A | 2006 | 236 | 22 | 7 | 51.892 | F | 0.500 | -0.290 |
| SN63 | 2006 | 236 | 22 | 8 | 19.510 | F | 0.500 | -0.255 |
| SN97 | 2006 | 236 | 22 | 8 | 10.317 | F | 0.500 | 0.233  |
| MUR  | 2006 | 236 | 22 | 9 | 14.398 | F | 0.500 | -1.275 |
| SN65 | 2006 | 236 | 22 | 8 | 20.025 | F | 0.500 | 0.301  |
| O07A | 2006 | 236 | 22 | 8 | 4.814  | F | 0.500 | -0.326 |
| K08A | 2006 | 236 | 22 | 7 | 45.553 | F | 0.500 | -0.082 |
| R07C | 2006 | 236 | 22 | 8 | 23.037 | F | 0.500 | 0.683  |
| JCS  | 2006 | 236 | 22 | 9 | 24.402 | F | 0.500 | -0.643 |

|      |      |     |    |   |        |   |       |        |
|------|------|-----|----|---|--------|---|-------|--------|
| L09A | 2006 | 236 | 22 | 7 | 58.045 | F | 0.500 | -0.075 |
| S08C | 2006 | 236 | 22 | 8 | 36.615 | F | 0.500 | 2.196  |
| R05C | 2006 | 236 | 22 | 8 | 9.029  | F | 0.500 | 0.004  |
| O06A | 2006 | 236 | 22 | 7 | 57.226 | F | 0.500 | -0.684 |
| SNA8 | 2006 | 236 | 22 | 8 | 9.447  | F | 0.500 | 0.268  |
| SN64 | 2006 | 236 | 22 | 8 | 20.026 | F | 0.500 | 0.194  |
| L08A | 2006 | 236 | 22 | 7 | 51.117 | F | 0.500 | -0.315 |
| S06C | 2006 | 236 | 22 | 8 | 17.929 | F | 0.500 | 0.102  |
| L07A | 2006 | 236 | 22 | 7 | 45.273 | F | 0.500 | -0.353 |
| K09A | 2006 | 236 | 22 | 7 | 51.386 | F | 0.500 | -0.367 |
| P09A | 2006 | 236 | 22 | 8 | 24.236 | F | 0.500 | 0.492  |
| SN74 | 2006 | 236 | 22 | 8 | 16.323 | F | 0.500 | 0.037  |
| P05C | 2006 | 236 | 22 | 7 | 58.536 | F | 0.500 | -0.960 |
| S09A | 2006 | 236 | 22 | 8 | 40.352 | F | 0.500 | 1.050  |
| N09A | 2006 | 236 | 22 | 8 | 9.118  | F | 0.500 | -0.180 |
| SN96 | 2006 | 236 | 22 | 8 | 11.445 | F | 0.500 | 0.167  |
| SN75 | 2006 | 236 | 22 | 8 | 17.368 | F | 0.500 | 0.182  |
| N10A | 2006 | 236 | 22 | 8 | 18.671 | F | 0.500 | 0.618  |
| SNF8 | 2006 | 236 | 22 | 7 | 52.158 | F | 0.500 | -0.971 |
| K07A | 2006 | 236 | 22 | 7 | 40.047 | F | 0.500 | -0.263 |
| HELL | 2006 | 236 | 22 | 8 | 34.061 | F | 0.500 | -0.665 |
| J09A | 2006 | 236 | 22 | 7 | 46.105 | F | 0.500 | 0.170  |
| J08A | 2006 | 236 | 22 | 7 | 40.867 | F | 0.500 | 0.507  |
| SNB9 | 2006 | 236 | 22 | 8 | 7.110  | F | 0.500 | 0.296  |
| N07B | 2006 | 236 | 22 | 7 | 58.431 | F | 0.500 | -0.617 |
| O08A | 2006 | 236 | 22 | 8 | 9.604  | F | 0.500 | 0.017  |
| WCN  | 2006 | 236 | 22 | 8 | 6.158  | F | 0.500 | 0.046  |
| SN85 | 2006 | 236 | 22 | 8 | 13.740 | F | 0.500 | 0.070  |
| N08A | 2006 | 236 | 22 | 8 | 5.009  | F | 0.500 | -0.401 |

|      |      |     |    |         |           |           |          |        |       |
|------|------|-----|----|---------|-----------|-----------|----------|--------|-------|
| 2006 | 237  | 0   | 44 | 49.0966 | -24.40300 | -67.02800 | 184.0000 | 33     | 2.937 |
| DGR  | 2006 | 237 | 1  | 5       | 32.368    | F         | 0.500    | 1.292  |       |
| USC  | 2006 | 237 | 1  | 5       | 43.362    | F         | 0.500    | 1.152  |       |
| Q07A | 2006 | 237 | 1  | 6       | 22.149    | F         | 0.500    | 0.744  |       |
| VES  | 2006 | 237 | 1  | 6       | 0.432     | F         | 0.500    | -0.256 |       |
| ADO  | 2006 | 237 | 1  | 5       | 40.694    | F         | 0.500    | 0.139  |       |
| SBC  | 2006 | 237 | 1  | 5       | 53.890    | F         | 0.500    | -0.702 |       |
| BAK  | 2006 | 237 | 1  | 5       | 58.001    | F         | 0.500    | 0.704  |       |
| U10A | 2006 | 237 | 1  | 5       | 48.916    | F         | 0.500    | 1.249  |       |
| CVS  | 2006 | 237 | 1  | 6       | 38.076    | F         | 0.500    | -1.118 |       |
| WDC  | 2006 | 237 | 1  | 6       | 50.835    | F         | 0.500    | -3.445 |       |
| M03C | 2006 | 237 | 1  | 6       | 54.165    | F         | 0.500    | -1.883 |       |
| M10A | 2006 | 237 | 1  | 6       | 26.970    | F         | 0.500    | -0.233 |       |
| M08A | 2006 | 237 | 1  | 6       | 35.512    | F         | 0.500    | -1.141 |       |
| T05C | 2006 | 237 | 1  | 6       | 18.187    | F         | 0.500    | 0.038  |       |
| YBH  | 2006 | 237 | 1  | 7       | 0.555     | F         | 0.500    | 0.344  |       |
| ELFS | 2006 | 237 | 1  | 6       | 44.255    | F         | 0.500    | -0.294 |       |
| TPH  | 2006 | 237 | 1  | 6       | 6.296     | F         | 0.500    | 0.664  |       |
| TIN  | 2006 | 237 | 1  | 6       | 4.626     | F         | 0.500    | 0.450  |       |
| SN87 | 2006 | 237 | 1  | 6       | 25.349    | F         | 0.500    | 0.368  |       |
| SMM  | 2006 | 237 | 1  | 6       | 2.695     | F         | 0.500    | -0.186 |       |
| M02C | 2006 | 237 | 1  | 6       | 59.688    | F         | 0.500    | 0.277  |       |
| GRA  | 2006 | 237 | 1  | 5       | 59.773    | F         | 0.500    | 1.344  |       |
| L05A | 2006 | 237 | 1  | 6       | 54.271    | F         | 0.500    | -0.276 |       |
| R10A | 2006 | 237 | 1  | 6       | 3.068     | F         | 0.500    | 1.400  |       |
| Q09A | 2006 | 237 | 1  | 6       | 11.846    | F         | 0.500    | 0.754  |       |
| V05C | 2006 | 237 | 1  | 6       | 6.191     | F         | 0.500    | -0.082 |       |
| J07A | 2006 | 237 | 1  | 6       | 54.808    | F         | 0.500    | -0.052 |       |
| M09A | 2006 | 237 | 1  | 6       | 30.291    | F         | 0.500    | -1.059 |       |
| P06A | 2006 | 237 | 1  | 6       | 33.757    | F         | 0.500    | 0.524  |       |
| WENL | 2006 | 237 | 1  | 6       | 29.894    | F         | 0.500    | 0.073  |       |
| M05C | 2006 | 237 | 1  | 6       | 50.659    | F         | 0.500    | -1.034 |       |
| O04C | 2006 | 237 | 1  | 6       | 43.733    | F         | 0.500    | -0.685 |       |

|      |      |     |   |   |        |   |       |        |
|------|------|-----|---|---|--------|---|-------|--------|
| O02C | 2006 | 237 | 1 | 6 | 52.339 | F | 0.500 | -0.873 |
| K04A | 2006 | 237 | 1 | 7 | 2.681  | F | 0.500 | 2.091  |
| MPP  | 2006 | 237 | 1 | 5 | 58.310 | F | 0.500 | -0.529 |
| SNCC | 2006 | 237 | 1 | 5 | 44.776 | F | 0.500 | 0.084  |
| ARV  | 2006 | 237 | 1 | 5 | 53.842 | F | 0.500 | 0.165  |
| L04A | 2006 | 237 | 1 | 7 | 0.015  | F | 0.500 | 0.764  |
| SN14 | 2006 | 237 | 1 | 6 | 8.009  | F | 0.500 | -0.882 |
| R08A | 2006 | 237 | 1 | 6 | 13.557 | F | 0.500 | 0.456  |
| S05C | 2006 | 237 | 1 | 6 | 18.202 | F | 0.500 | -0.942 |
| FUR  | 2006 | 237 | 1 | 5 | 52.238 | F | 0.500 | 1.172  |
| PHL  | 2006 | 237 | 1 | 6 | 6.270  | F | 0.500 | -0.945 |
| M06C | 2006 | 237 | 1 | 6 | 46.191 | F | 0.500 | -0.589 |
| M07A | 2006 | 237 | 1 | 6 | 39.691 | F | 0.500 | -1.137 |
| K06A | 2006 | 237 | 1 | 6 | 56.126 | F | 0.500 | 0.228  |
| FMP  | 2006 | 237 | 1 | 5 | 40.731 | F | 0.500 | 0.690  |
| WVOR | 2006 | 237 | 1 | 6 | 44.012 | F | 0.500 | -1.151 |
| N09A | 2006 | 237 | 1 | 6 | 26.802 | F | 0.500 | -0.902 |
| M04C | 2006 | 237 | 1 | 6 | 57.627 | F | 0.500 | 0.183  |
| OSI  | 2006 | 237 | 1 | 5 | 49.090 | F | 0.500 | -0.428 |
| K08A | 2006 | 237 | 1 | 6 | 45.747 | F | 0.500 | -0.797 |
| SNC5 | 2006 | 237 | 1 | 6 | 32.933 | F | 0.500 | -0.769 |
| TOV  | 2006 | 237 | 1 | 5 | 46.657 | F | 0.500 | -0.007 |
| J09A | 2006 | 237 | 1 | 6 | 46.283 | F | 0.500 | -0.466 |
| SNG7 | 2006 | 237 | 1 | 6 | 42.703 | F | 0.500 | -0.740 |
| SND5 | 2006 | 237 | 1 | 6 | 34.886 | F | 0.500 | -0.762 |
| SNB7 | 2006 | 237 | 1 | 6 | 30.437 | F | 0.500 | -0.041 |
| SAO  | 2006 | 237 | 1 | 6 | 22.779 | F | 0.500 | 0.480  |
| SUTB | 2006 | 237 | 1 | 6 | 40.157 | F | 0.500 | -0.847 |
| SN65 | 2006 | 237 | 1 | 6 | 19.757 | F | 0.500 | 0.285  |
| DJJ  | 2006 | 237 | 1 | 5 | 44.323 | F | 0.500 | 0.274  |
| Q08A | 2006 | 237 | 1 | 6 | 15.809 | F | 0.500 | 0.281  |
| SNF6 | 2006 | 237 | 1 | 6 | 39.618 | F | 0.500 | -0.709 |
| P07A | 2006 | 237 | 1 | 6 | 26.937 | F | 0.500 | 0.910  |
| J08A | 2006 | 237 | 1 | 6 | 50.550 | F | 0.500 | -0.221 |
| K07A | 2006 | 237 | 1 | 6 | 49.709 | F | 0.500 | -0.680 |
| LGU  | 2006 | 237 | 1 | 5 | 47.632 | F | 0.500 | -0.315 |
| CWC  | 2006 | 237 | 1 | 6 | 0.122  | F | 0.500 | 1.174  |
| J05A | 2006 | 237 | 1 | 7 | 5.283  | F | 0.500 | 3.471  |
| L08A | 2006 | 237 | 1 | 6 | 40.002 | F | 0.500 | -1.830 |
| RPV  | 2006 | 237 | 1 | 5 | 41.545 | F | 0.500 | 0.714  |
| L09A | 2006 | 237 | 1 | 6 | 35.245 | F | 0.500 | -1.706 |
| SN34 | 2006 | 237 | 1 | 6 | 11.255 | F | 0.500 | -0.819 |
| SNA8 | 2006 | 237 | 1 | 6 | 27.725 | F | 0.500 | 0.210  |
| O09A | 2006 | 237 | 1 | 6 | 20.318 | F | 0.500 | -0.585 |
| SLA  | 2006 | 237 | 1 | 5 | 50.174 | F | 0.500 | 0.494  |
| PIN  | 2006 | 237 | 1 | 7 | 6.962  | F | 0.500 | 4.128  |
| SN24 | 2006 | 237 | 1 | 6 | 9.800  | F | 0.500 | -0.967 |
| O07A | 2006 | 237 | 1 | 6 | 30.350 | F | 0.500 | -0.109 |
| DEC  | 2006 | 237 | 1 | 5 | 44.315 | F | 0.500 | 0.119  |
| VCS  | 2006 | 237 | 1 | 5 | 44.458 | F | 0.500 | -0.270 |
| N02C | 2006 | 237 | 1 | 6 | 59.960 | F | 0.500 | 1.091  |
| PACP | 2006 | 237 | 1 | 6 | 22.561 | F | 0.500 | -0.422 |
| R06C | 2006 | 237 | 1 | 6 | 23.510 | F | 0.500 | 1.016  |
| HAST | 2006 | 237 | 1 | 6 | 20.513 | F | 0.500 | 0.078  |
| SND4 | 2006 | 237 | 1 | 6 | 35.332 | F | 0.500 | -0.644 |
| CIA  | 2006 | 237 | 1 | 5 | 38.881 | F | 0.500 | 0.450  |
| S04C | 2006 | 237 | 1 | 6 | 26.536 | F | 0.500 | 0.134  |
| CHF  | 2006 | 237 | 1 | 5 | 43.185 | F | 0.500 | 0.288  |
| U04C | 2006 | 237 | 1 | 6 | 15.301 | F | 0.500 | 0.103  |
| N08A | 2006 | 237 | 1 | 6 | 30.159 | F | 0.500 | -0.593 |
| R07C | 2006 | 237 | 1 | 6 | 17.980 | F | 0.500 | 1.134  |
| SNE6 | 2006 | 237 | 1 | 6 | 37.181 | F | 0.500 | -0.169 |
| SHO  | 2006 | 237 | 1 | 5 | 43.998 | F | 0.500 | 0.886  |

|      |      |     |   |   |        |   |       |        |
|------|------|-----|---|---|--------|---|-------|--------|
| O08A | 2006 | 237 | 1 | 6 | 26.642 | F | 0.500 | -0.853 |
| ISA  | 2006 | 237 | 1 | 5 | 56.085 | F | 0.500 | 0.397  |
| L07A | 2006 | 237 | 1 | 6 | 45.484 | F | 0.500 | -0.668 |
| N10A | 2006 | 237 | 1 | 6 | 20.289 | F | 0.500 | -0.898 |
| SNC4 | 2006 | 237 | 1 | 6 | 32.823 | F | 0.500 | -0.439 |
| SN43 | 2006 | 237 | 1 | 6 | 13.508 | F | 0.500 | -1.400 |
| SN12 | 2006 | 237 | 1 | 6 | 6.962  | F | 0.500 | -1.307 |
| K09A | 2006 | 237 | 1 | 6 | 40.850 | F | 0.500 | -1.088 |
| PKD  | 2006 | 237 | 1 | 6 | 10.984 | F | 0.500 | 0.072  |
| V04C | 2006 | 237 | 1 | 6 | 11.072 | F | 0.500 | 0.116  |
| O05C | 2006 | 237 | 1 | 6 | 40.716 | F | 0.500 | -0.184 |
| ORV  | 2006 | 237 | 1 | 6 | 41.211 | F | 0.500 | -0.068 |
| SN45 | 2006 | 237 | 1 | 6 | 15.027 | F | 0.500 | 0.455  |
| K05A | 2006 | 237 | 1 | 6 | 58.983 | F | 0.500 | 0.614  |
| SNC8 | 2006 | 237 | 1 | 6 | 33.503 | F | 0.500 | 0.660  |
| T06C | 2006 | 237 | 1 | 6 | 10.400 | F | 0.500 | -2.494 |
| RRX  | 2006 | 237 | 1 | 5 | 40.520 | F | 0.500 | 0.254  |
| O10A | 2006 | 237 | 1 | 6 | 17.415 | F | 0.500 | -0.562 |
| SNG5 | 2006 | 237 | 1 | 6 | 42.130 | F | 0.500 | -0.830 |
| SNB5 | 2006 | 237 | 1 | 6 | 30.451 | F | 0.500 | -0.790 |
| SN63 | 2006 | 237 | 1 | 6 | 18.340 | F | 0.500 | -0.712 |
| I09A | 2006 | 237 | 1 | 6 | 50.469 | F | 0.500 | -0.685 |
| SNC3 | 2006 | 237 | 1 | 6 | 33.001 | F | 0.500 | -0.987 |
| SNF8 | 2006 | 237 | 1 | 6 | 39.794 | F | 0.500 | -0.213 |
| SN97 | 2006 | 237 | 1 | 6 | 27.009 | F | 0.500 | 0.289  |
| S09A | 2006 | 237 | 1 | 6 | 4.345  | F | 0.500 | 1.357  |
| WCN  | 2006 | 237 | 1 | 6 | 30.459 | F | 0.500 | 0.616  |
| SNA5 | 2006 | 237 | 1 | 6 | 28.199 | F | 0.500 | -0.293 |
| N07B | 2006 | 237 | 1 | 6 | 34.825 | F | 0.500 | -0.569 |
| P05C | 2006 | 237 | 1 | 6 | 34.616 | F | 0.500 | -0.086 |
| O06A | 2006 | 237 | 1 | 6 | 36.296 | F | 0.500 | 0.212  |
| MWC  | 2006 | 237 | 1 | 5 | 42.529 | F | 0.500 | 0.150  |
| SNE4 | 2006 | 237 | 1 | 6 | 37.642 | F | 0.500 | -0.839 |
| S08C | 2006 | 237 | 1 | 6 | 8.179  | F | 0.500 | 0.610  |
| I08A | 2006 | 237 | 1 | 6 | 54.353 | F | 0.500 | -0.264 |
| MPM  | 2006 | 237 | 1 | 5 | 53.324 | F | 0.500 | 0.802  |
| R09A | 2006 | 237 | 1 | 6 | 7.174  | F | 0.500 | 1.129  |
| BEK  | 2006 | 237 | 1 | 6 | 37.457 | F | 0.500 | 0.353  |
| P09A | 2006 | 237 | 1 | 6 | 15.668 | F | 0.500 | -0.522 |
| LAVA | 2006 | 237 | 1 | 6 | 30.818 | F | 0.500 | -0.829 |
| HEC  | 2006 | 237 | 1 | 5 | 36.607 | F | 0.500 | 0.967  |
| J06A | 2006 | 237 | 1 | 6 | 58.297 | F | 0.500 | 0.751  |
| JCS  | 2006 | 237 | 1 | 5 | 25.086 | F | 0.500 | 1.142  |
| SNB9 | 2006 | 237 | 1 | 6 | 30.020 | F | 0.500 | 0.595  |
| SNA4 | 2006 | 237 | 1 | 6 | 28.182 | F | 0.500 | -0.588 |
| SVD  | 2006 | 237 | 1 | 5 | 36.485 | F | 0.500 | 1.567  |
| PLM  | 2006 | 237 | 1 | 5 | 29.378 | F | 0.500 | 1.372  |
| PAS  | 2006 | 237 | 1 | 5 | 42.662 | F | 0.500 | 0.356  |
| SNE7 | 2006 | 237 | 1 | 6 | 38.844 | F | 0.500 | -0.179 |
| S06C | 2006 | 237 | 1 | 6 | 19.923 | F | 0.500 | -0.373 |
| LRL  | 2006 | 237 | 1 | 5 | 49.370 | F | 0.500 | 0.179  |
| HELL | 2006 | 237 | 1 | 6 | 5.274  | F | 0.500 | -1.165 |
| SN85 | 2006 | 237 | 1 | 6 | 23.769 | F | 0.500 | -0.185 |
| SN74 | 2006 | 237 | 1 | 6 | 21.312 | F | 0.500 | -0.282 |
| SNA7 | 2006 | 237 | 1 | 6 | 28.839 | F | 0.500 | 0.034  |
| SN64 | 2006 | 237 | 1 | 6 | 19.025 | F | 0.500 | -0.123 |
| R04C | 2006 | 237 | 1 | 6 | 28.866 | F | 0.500 | -0.263 |
| N06A | 2006 | 237 | 1 | 6 | 40.153 | F | 0.500 | 0.173  |
| BFS  | 2006 | 237 | 1 | 5 | 40.565 | F | 0.500 | 0.635  |
| SN96 | 2006 | 237 | 1 | 6 | 25.577 | F | 0.500 | -0.217 |
| I06A | 2006 | 237 | 1 | 7 | 4.467  | F | 0.500 | 3.481  |
| SN84 | 2006 | 237 | 1 | 6 | 23.519 | F | 0.500 | -0.578 |
| CMB  | 2006 | 237 | 1 | 6 | 24.176 | F | 0.500 | -0.434 |



|      |      |     |   |   |        |   |       |        |
|------|------|-----|---|---|--------|---|-------|--------|
| SN95 | 2006 | 237 | 1 | 6 | 25.501 | F | 0.500 | -0.660 |
| GSC  | 2006 | 237 | 1 | 5 | 43.337 | F | 0.500 | 1.019  |
| R05C | 2006 | 237 | 1 | 6 | 27.575 | F | 0.500 | -0.261 |
| SNA3 | 2006 | 237 | 1 | 6 | 28.455 | F | 0.500 | -0.469 |
| SND8 | 2006 | 237 | 1 | 6 | 35.369 | F | 0.500 | 0.404  |
| MUR  | 2006 | 237 | 1 | 5 | 32.874 | F | 0.500 | 0.990  |
| SN75 | 2006 | 237 | 1 | 6 | 21.793 | F | 0.500 | 0.372  |
| SN93 | 2006 | 237 | 1 | 6 | 26.076 | F | 0.500 | -0.372 |
| BBR  | 2006 | 237 | 1 | 5 | 36.709 | F | 0.500 | 1.449  |
| HOPS | 2006 | 237 | 1 | 6 | 47.434 | F | 0.500 | 0.384  |

|      |      |     |    |         |          |            |         |        |       |
|------|------|-----|----|---------|----------|------------|---------|--------|-------|
| 2006 | 244  | 12  | 4  | 25.0988 | 53.97000 | -166.39200 | 75.6000 | 34     | 2.929 |
| V04C | 2006 | 244 | 12 | 16      | 58.751   | F          | 0.500   | 1.237  |       |
| M04C | 2006 | 244 | 12 | 15      | 46.524   | F          | 0.500   | 0.179  |       |
| L04A | 2006 | 244 | 12 | 15      | 42.202   | F          | 0.500   | 0.141  |       |
| HEC  | 2006 | 244 | 12 | 17      | 45.329   | F          | 0.500   | -0.755 |       |
| GASB | 2006 | 244 | 12 | 16      | 1.279    | F          | 0.500   | 1.893  |       |
| GSC  | 2006 | 244 | 12 | 17      | 35.943   | F          | 0.500   | -1.070 |       |
| SNB7 | 2006 | 244 | 12 | 16      | 28.226   | F          | 0.500   | -0.667 |       |
| CWC  | 2006 | 244 | 12 | 17      | 14.310   | F          | 0.500   | 0.191  |       |
| J08A | 2006 | 244 | 12 | 16      | 1.955    | F          | 0.500   | -0.501 |       |
| CVS  | 2006 | 244 | 12 | 16      | 16.595   | F          | 0.500   | 1.755  |       |
| SUTB | 2006 | 244 | 12 | 16      | 10.842   | F          | 0.500   | -0.967 |       |
| ADO  | 2006 | 244 | 12 | 17      | 39.114   | F          | 0.500   | -0.425 |       |
| U05C | 2006 | 244 | 12 | 16      | 58.491   | F          | 0.500   | 1.869  |       |
| R08A | 2006 | 244 | 12 | 16      | 53.408   | F          | 0.500   | -0.713 |       |
| K04A | 2006 | 244 | 12 | 15      | 39.529   | F          | 0.500   | 0.120  |       |
| DJJ  | 2006 | 244 | 12 | 17      | 34.096   | F          | 0.500   | -1.011 |       |
| FARB | 2006 | 244 | 12 | 16      | 17.077   | F          | 0.500   | 0.516  |       |
| O06A | 2006 | 244 | 12 | 16      | 19.630   | F          | 0.500   | -0.883 |       |
| SMM  | 2006 | 244 | 12 | 17      | 10.024   | F          | 0.500   | 1.192  |       |
| SND8 | 2006 | 244 | 12 | 16      | 20.918   | F          | 0.500   | -1.147 |       |
| L08A | 2006 | 244 | 12 | 16      | 13.445   | F          | 0.500   | -0.992 |       |
| S05C | 2006 | 244 | 12 | 16      | 43.911   | F          | 0.500   | -0.388 |       |
| T05C | 2006 | 244 | 12 | 16      | 47.883   | F          | 0.500   | 1.948  |       |
| PKD  | 2006 | 244 | 12 | 16      | 57.678   | F          | 0.500   | 0.465  |       |
| M06C | 2006 | 244 | 12 | 16      | 4.558    | F          | 0.500   | 0.129  |       |
| VES  | 2006 | 244 | 12 | 17      | 10.209   | F          | 0.500   | -0.857 |       |
| K06A | 2006 | 244 | 12 | 15      | 51.830   | F          | 0.500   | 0.514  |       |
| J09A | 2006 | 244 | 12 | 16      | 8.461    | F          | 0.500   | -0.652 |       |
| R07C | 2006 | 244 | 12 | 16      | 48.909   | F          | 0.500   | 0.337  |       |
| J06A | 2006 | 244 | 12 | 15      | 48.351   | F          | 0.500   | 0.224  |       |
| L05A | 2006 | 244 | 12 | 15      | 53.576   | F          | 0.500   | 0.459  |       |
| WVOR | 2006 | 244 | 12 | 16      | 8.004    | F          | 0.500   | -1.427 |       |
| EDW2 | 2006 | 244 | 12 | 17      | 29.912   | F          | 0.500   | -1.014 |       |
| PACP | 2006 | 244 | 12 | 16      | 40.454   | F          | 0.500   | 0.988  |       |
| SLA  | 2006 | 244 | 12 | 17      | 26.371   | F          | 0.500   | -0.386 |       |
| P09A | 2006 | 244 | 12 | 16      | 50.158   | F          | 0.500   | -0.732 |       |
| LGU  | 2006 | 244 | 12 | 17      | 29.172   | F          | 0.500   | -0.704 |       |
| MPP  | 2006 | 244 | 12 | 17      | 16.342   | F          | 0.500   | 1.113  |       |
| LRL  | 2006 | 244 | 12 | 17      | 26.297   | F          | 0.500   | -1.302 |       |
| R04C | 2006 | 244 | 12 | 16      | 29.789   | F          | 0.500   | 0.462  |       |
| MNRC | 2006 | 244 | 12 | 16      | 13.219   | F          | 0.500   | 3.595  |       |
| I06A | 2006 | 244 | 12 | 15      | 41.135   | F          | 0.500   | -0.018 |       |
| J05A | 2006 | 244 | 12 | 15      | 38.532   | F          | 0.500   | 0.748  |       |
| ISA  | 2006 | 244 | 12 | 17      | 16.812   | F          | 0.500   | -1.630 |       |
| R06C | 2006 | 244 | 12 | 16      | 40.316   | F          | 0.500   | -0.185 |       |
| N06A | 2006 | 244 | 12 | 16      | 14.131   | F          | 0.500   | -0.562 |       |
| DEC  | 2006 | 244 | 12 | 17      | 34.364   | F          | 0.500   | -0.350 |       |
| RCT  | 2006 | 244 | 12 | 17      | 4.052    | F          | 0.500   | -0.638 |       |
| PAS  | 2006 | 244 | 12 | 17      | 36.456   | F          | 0.500   | -0.721 |       |
| R09A | 2006 | 244 | 12 | 17      | 3.745    | F          | 0.500   | -0.892 |       |
| S09A | 2006 | 244 | 12 | 17      | 8.573    | F          | 0.500   | 0.043  |       |

|      |      |     |    |    |        |   |       |        |
|------|------|-----|----|----|--------|---|-------|--------|
| Q04C | 2006 | 244 | 12 | 16 | 20.356 | F | 0.500 | 0.984  |
| MWC  | 2006 | 244 | 12 | 17 | 37.179 | F | 0.500 | -0.593 |
| P01C | 2006 | 244 | 12 | 15 | 57.458 | F | 0.500 | 2.161  |
| M05C | 2006 | 244 | 12 | 15 | 56.929 | F | 0.500 | 0.154  |
| O02C | 2006 | 244 | 12 | 15 | 55.009 | F | 0.500 | 1.636  |
| SN14 | 2006 | 244 | 12 | 17 | 1.930  | F | 0.500 | 1.002  |
| O05C | 2006 | 244 | 12 | 16 | 12.242 | F | 0.500 | -0.200 |
| M02C | 2006 | 244 | 12 | 15 | 42.545 | F | 0.500 | 1.898  |
| SNE7 | 2006 | 244 | 12 | 16 | 15.111 | F | 0.500 | -0.907 |
| HELL | 2006 | 244 | 12 | 17 | 2.568  | F | 0.500 | -0.554 |
| WDC  | 2006 | 244 | 12 | 15 | 51.979 | F | 0.500 | 0.634  |
| SNE5 | 2006 | 244 | 12 | 16 | 15.092 | F | 0.500 | -0.973 |
| SNA8 | 2006 | 244 | 12 | 16 | 33.142 | F | 0.500 | -0.229 |
| CIA  | 2006 | 244 | 12 | 17 | 41.904 | F | 0.500 | -1.275 |
| I08A | 2006 | 244 | 12 | 15 | 55.995 | F | 0.500 | -0.554 |
| SNA4 | 2006 | 244 | 12 | 16 | 30.866 | F | 0.500 | 0.159  |
| ORV  | 2006 | 244 | 12 | 16 | 10.119 | F | 0.500 | -0.983 |
| SNB9 | 2006 | 244 | 12 | 16 | 30.536 | F | 0.500 | -0.203 |
| DGR  | 2006 | 244 | 12 | 17 | 51.773 | F | 0.500 | -0.862 |
| N02C | 2006 | 244 | 12 | 15 | 43.529 | F | 0.500 | 1.440  |
| SNA7 | 2006 | 244 | 12 | 16 | 31.402 | F | 0.500 | -0.216 |
| OSI  | 2006 | 244 | 12 | 17 | 27.497 | F | 0.500 | -0.020 |
| PHL  | 2006 | 244 | 12 | 17 | 3.550  | F | 0.500 | 0.760  |
| SND4 | 2006 | 244 | 12 | 16 | 19.192 | F | 0.500 | -0.175 |
| SNG5 | 2006 | 244 | 12 | 16 | 8.770  | F | 0.500 | -0.449 |
| SN97 | 2006 | 244 | 12 | 16 | 34.021 | F | 0.500 | -0.389 |
| YBH  | 2006 | 244 | 12 | 15 | 40.007 | F | 0.500 | 1.285  |
| SNF8 | 2006 | 244 | 12 | 16 | 13.950 | F | 0.500 | -0.859 |
| SN12 | 2006 | 244 | 12 | 17 | 0.386  | F | 0.500 | -0.206 |
| K05A | 2006 | 244 | 12 | 15 | 46.839 | F | 0.500 | 0.672  |
| SN24 | 2006 | 244 | 12 | 16 | 58.511 | F | 0.500 | 0.933  |
| SN55 | 2006 | 244 | 12 | 16 | 48.711 | F | 0.500 | 0.397  |
| SNC8 | 2006 | 244 | 12 | 16 | 24.807 | F | 0.500 | -0.908 |
| SN93 | 2006 | 244 | 12 | 16 | 34.435 | F | 0.500 | 0.980  |
| Q08A | 2006 | 244 | 12 | 16 | 49.602 | F | 0.500 | -0.944 |
| VTV  | 2006 | 244 | 12 | 17 | 39.614 | F | 0.500 | -0.588 |
| P05C | 2006 | 244 | 12 | 16 | 20.859 | F | 0.500 | -1.251 |
| O04C | 2006 | 244 | 12 | 16 | 7.805  | F | 0.500 | 0.269  |
| BFS  | 2006 | 244 | 12 | 17 | 40.739 | F | 0.500 | -0.151 |
| SN43 | 2006 | 244 | 12 | 16 | 51.832 | F | 0.500 | 0.122  |
| SN85 | 2006 | 244 | 12 | 16 | 38.626 | F | 0.500 | 0.126  |
| R05C | 2006 | 244 | 12 | 16 | 32.832 | F | 0.500 | -0.334 |
| SN34 | 2006 | 244 | 12 | 16 | 56.711 | F | 0.500 | 1.050  |
| SNB5 | 2006 | 244 | 12 | 16 | 26.828 | F | 0.500 | -0.463 |
| SNE4 | 2006 | 244 | 12 | 16 | 15.076 | F | 0.500 | -0.502 |
| SNG7 | 2006 | 244 | 12 | 16 | 8.766  | F | 0.500 | -0.094 |
| BBR  | 2006 | 244 | 12 | 17 | 46.545 | F | 0.500 | -0.813 |
| SVD  | 2006 | 244 | 12 | 17 | 46.316 | F | 0.500 | -0.810 |
| SNF6 | 2006 | 244 | 12 | 16 | 13.029 | F | 0.500 | -0.780 |
| WCN  | 2006 | 244 | 12 | 16 | 29.524 | F | 0.500 | -0.333 |
| SND5 | 2006 | 244 | 12 | 16 | 19.345 | F | 0.500 | -0.705 |
| SNC5 | 2006 | 244 | 12 | 16 | 22.935 | F | 0.500 | -0.345 |
| SNC3 | 2006 | 244 | 12 | 16 | 23.774 | F | 0.500 | 1.342  |
| CHF  | 2006 | 244 | 12 | 17 | 36.633 | F | 0.500 | -0.131 |
| PLM  | 2006 | 244 | 12 | 17 | 57.167 | F | 0.500 | -0.223 |
| SN63 | 2006 | 244 | 12 | 16 | 45.502 | F | 0.500 | -0.067 |
| MUR  | 2006 | 244 | 12 | 17 | 50.898 | F | 0.500 | -0.644 |
| SN75 | 2006 | 244 | 12 | 16 | 42.754 | F | 0.500 | 0.213  |
| SN64 | 2006 | 244 | 12 | 16 | 45.905 | F | 0.500 | 0.295  |
| SN74 | 2006 | 244 | 12 | 16 | 41.822 | F | 0.500 | 0.252  |
| S08C | 2006 | 244 | 12 | 17 | 4.367  | F | 0.500 | 1.704  |
| SNE6 | 2006 | 244 | 12 | 16 | 17.043 | F | 0.500 | -1.039 |
| LAVA | 2006 | 244 | 12 | 16 | 26.238 | F | 0.500 | 0.019  |

|      |      |     |    |    |        |   |       |        |
|------|------|-----|----|----|--------|---|-------|--------|
| SNA5 | 2006 | 244 | 12 | 16 | 31.109 | F | 0.500 | -0.328 |
| SN84 | 2006 | 244 | 12 | 16 | 38.094 | F | 0.500 | 0.087  |
| T06C | 2006 | 244 | 12 | 16 | 53.219 | F | 0.500 | -0.147 |
| JCS  | 2006 | 244 | 12 | 18 | 2.741  | F | 0.500 | 0.211  |
| S06C | 2006 | 244 | 12 | 16 | 43.733 | F | 0.500 | 0.366  |
| SN95 | 2006 | 244 | 12 | 16 | 35.326 | F | 0.500 | 0.178  |
| SNA3 | 2006 | 244 | 12 | 16 | 30.983 | F | 0.500 | 0.759  |
| SN96 | 2006 | 244 | 12 | 16 | 35.905 | F | 0.500 | 0.174  |
| CMB  | 2006 | 244 | 12 | 16 | 37.453 | F | 0.500 | 0.683  |
| VCS  | 2006 | 244 | 12 | 17 | 33.974 | F | 0.500 | -0.227 |

|      |     |   |    |         |          |            |         |    |       |
|------|-----|---|----|---------|----------|------------|---------|----|-------|
| 2006 | 261 | 3 | 45 | 58.4360 | 51.59600 | -173.96100 | 18.0000 | 35 | 1.496 |
|------|-----|---|----|---------|----------|------------|---------|----|-------|

|      |      |     |   |    |        |   |       |        |
|------|------|-----|---|----|--------|---|-------|--------|
| LAVA | 2006 | 261 | 3 | 59 | 19.324 | F | 0.500 | 0.310  |
| N09A | 2006 | 261 | 3 | 59 | 28.978 | F | 0.500 | -1.532 |
| CIA  | 2006 | 261 | 4 | 0  | 30.229 | F | 0.500 | -0.854 |
| MWC  | 2006 | 261 | 4 | 0  | 25.131 | F | 0.500 | -1.580 |
| O06A | 2006 | 261 | 3 | 59 | 13.938 | F | 0.500 | -1.151 |
| SNC8 | 2006 | 261 | 3 | 59 | 18.715 | F | 0.500 | -0.768 |
| WVOR | 2006 | 261 | 3 | 59 | 5.793  | F | 0.500 | -0.816 |
| SLA  | 2006 | 261 | 4 | 0  | 17.110 | F | 0.500 | -0.605 |
| N08A | 2006 | 261 | 3 | 59 | 24.002 | F | 0.500 | -1.485 |
| J08A | 2006 | 261 | 3 | 59 | 0.744  | F | 0.500 | 0.227  |
| N07B | 2006 | 261 | 3 | 59 | 16.581 | F | 0.500 | -1.121 |
| RRX  | 2006 | 261 | 4 | 0  | 29.268 | F | 0.500 | -0.462 |
| JCS  | 2006 | 261 | 4 | 0  | 51.094 | F | 0.500 | 0.222  |
| M07A | 2006 | 261 | 3 | 59 | 9.545  | F | 0.500 | -1.018 |
| HEC  | 2006 | 261 | 4 | 0  | 35.760 | F | 0.500 | -0.568 |
| SNB7 | 2006 | 261 | 3 | 59 | 21.845 | F | 0.500 | -0.339 |
| L04A | 2006 | 261 | 3 | 58 | 38.456 | F | 0.500 | 0.304  |
| J05A | 2006 | 261 | 3 | 58 | 36.269 | F | 0.500 | 1.080  |
| VTV  | 2006 | 261 | 4 | 0  | 29.358 | F | 0.500 | -0.434 |
| M02C | 2006 | 261 | 3 | 58 | 37.573 | F | 0.500 | 2.005  |
| BBR  | 2006 | 261 | 4 | 0  | 35.985 | F | 0.500 | -0.816 |
| K08A | 2006 | 261 | 3 | 59 | 5.210  | F | 0.500 | -0.315 |
| J03A | 2006 | 261 | 3 | 58 | 18.612 | F | 0.500 | 0.767  |
| SNE7 | 2006 | 261 | 3 | 59 | 9.399  | F | 0.500 | -0.528 |
| SNF8 | 2006 | 261 | 3 | 59 | 8.235  | F | 0.500 | -0.712 |
| O04C | 2006 | 261 | 3 | 59 | 2.324  | F | 0.500 | 0.416  |
| R07C | 2006 | 261 | 3 | 59 | 41.935 | F | 0.500 | 0.707  |
| PLM  | 2006 | 261 | 4 | 0  | 45.440 | F | 0.500 | -0.490 |
| I06A | 2006 | 261 | 3 | 58 | 40.251 | F | 0.500 | 0.852  |
| BFS  | 2006 | 261 | 4 | 0  | 29.718 | F | 0.500 | -0.308 |
| SNG5 | 2006 | 261 | 3 | 59 | 2.274  | F | 0.500 | -0.474 |
| J06A | 2006 | 261 | 3 | 58 | 46.659 | F | 0.500 | 0.889  |
| I09A | 2006 | 261 | 3 | 59 | 3.192  | F | 0.500 | 0.956  |
| Q08A | 2006 | 261 | 3 | 59 | 43.827 | F | 0.500 | -0.538 |
| BEK  | 2006 | 261 | 3 | 59 | 11.910 | F | 0.500 | -0.944 |
| N02C | 2006 | 261 | 3 | 58 | 37.842 | F | 0.500 | 1.671  |
| R04C | 2006 | 261 | 3 | 59 | 21.099 | F | 0.500 | -0.370 |
| HELL | 2006 | 261 | 3 | 59 | 53.503 | F | 0.500 | -0.806 |
| O05C | 2006 | 261 | 3 | 59 | 6.180  | F | 0.500 | -0.269 |
| S08C | 2006 | 261 | 3 | 59 | 56.720 | F | 0.500 | 1.713  |
| SNC6 | 2006 | 261 | 3 | 59 | 18.352 | F | 0.500 | -0.575 |
| P05C | 2006 | 261 | 3 | 59 | 14.741 | F | 0.500 | -0.796 |
| SNA8 | 2006 | 261 | 3 | 59 | 26.896 | F | 0.500 | -0.009 |
| SNA7 | 2006 | 261 | 3 | 59 | 25.314 | F | 0.500 | 0.380  |
| SNG7 | 2006 | 261 | 3 | 59 | 3.076  | F | 0.500 | 0.119  |
| SN14 | 2006 | 261 | 3 | 59 | 53.847 | F | 0.500 | 1.158  |
| SN34 | 2006 | 261 | 3 | 59 | 48.941 | F | 0.500 | 1.353  |
| SNB3 | 2006 | 261 | 3 | 59 | 19.236 | F | 0.500 | 0.981  |
| SNC7 | 2006 | 261 | 3 | 59 | 16.639 | F | 0.500 | -1.011 |
| ORV  | 2006 | 261 | 3 | 59 | 3.950  | F | 0.500 | -0.532 |
| O02C | 2006 | 261 | 3 | 58 | 48.890 | F | 0.500 | 1.971  |

|      |      |     |   |    |        |   |       |        |
|------|------|-----|---|----|--------|---|-------|--------|
| CHF  | 2006 | 261 | 4 | 0  | 25.864 | F | 0.500 | 0.027  |
| S09A | 2006 | 261 | 4 | 0  | 1.954  | F | 0.500 | 0.560  |
| WCN  | 2006 | 261 | 3 | 59 | 23.453 | F | 0.500 | -0.100 |
| N06A | 2006 | 261 | 3 | 59 | 9.445  | F | 0.500 | -0.459 |
| SNB9 | 2006 | 261 | 3 | 59 | 24.722 | F | 0.500 | 0.194  |
| R05C | 2006 | 261 | 3 | 59 | 26.153 | F | 0.500 | 0.055  |
| SNE5 | 2006 | 261 | 3 | 59 | 8.610  | F | 0.500 | -0.754 |
| SND5 | 2006 | 261 | 3 | 59 | 12.691 | F | 0.500 | -0.558 |
| SNC5 | 2006 | 261 | 3 | 59 | 16.264 | F | 0.500 | -0.092 |
| SN64 | 2006 | 261 | 3 | 59 | 38.329 | F | 0.500 | 0.489  |
| SN63 | 2006 | 261 | 3 | 59 | 37.813 | F | 0.500 | 0.233  |
| SN43 | 2006 | 261 | 3 | 59 | 43.930 | F | 0.500 | 0.429  |
| T06C | 2006 | 261 | 3 | 59 | 44.442 | F | 0.500 | -0.168 |
| SNF6 | 2006 | 261 | 3 | 59 | 6.801  | F | 0.500 | -0.652 |
| SN96 | 2006 | 261 | 3 | 59 | 28.793 | F | 0.500 | 0.358  |
| SNE4 | 2006 | 261 | 3 | 59 | 8.513  | F | 0.500 | -0.123 |
| SNA3 | 2006 | 261 | 3 | 59 | 23.320 | F | 0.500 | 0.724  |
| YBH  | 2006 | 261 | 3 | 58 | 35.913 | F | 0.500 | 1.833  |
| SN75 | 2006 | 261 | 3 | 59 | 35.343 | F | 0.500 | 0.353  |
| VCS  | 2006 | 261 | 4 | 0  | 22.927 | F | 0.500 | -0.497 |
| SN85 | 2006 | 261 | 3 | 59 | 31.742 | F | 0.500 | 0.699  |
| SNB5 | 2006 | 261 | 3 | 59 | 20.372 | F | 0.500 | 0.155  |
| CMB  | 2006 | 261 | 3 | 59 | 29.283 | F | 0.500 | 0.424  |
| S06C | 2006 | 261 | 3 | 59 | 35.950 | F | 0.500 | 0.460  |
| SND4 | 2006 | 261 | 3 | 59 | 12.476 | F | 0.500 | 0.205  |
| SNA4 | 2006 | 261 | 3 | 59 | 23.601 | F | 0.500 | 0.320  |
| SN74 | 2006 | 261 | 3 | 59 | 34.221 | F | 0.500 | 0.410  |
| SN84 | 2006 | 261 | 3 | 59 | 30.648 | F | 0.500 | 0.328  |
| SN95 | 2006 | 261 | 3 | 59 | 28.083 | F | 0.500 | 0.465  |
| O07A | 2006 | 261 | 3 | 59 | 22.731 | F | 0.500 | -1.167 |

|      |      |     |    |         |          |           |         |        |       |
|------|------|-----|----|---------|----------|-----------|---------|--------|-------|
| 2006 | 271  | 1   | 36 | 50.0052 | 46.46200 | 153.36000 | 11.0000 | 36     | 1.675 |
| SN43 | 2006 | 271 | 1  | 55      | 39.503   | F         | 0.500   | 0.021  |       |
| O02C | 2006 | 271 | 1  | 54      | 53.319   | F         | 0.500   | 2.124  |       |
| J03A | 2006 | 271 | 1  | 54      | 26.137   | F         | 0.500   | 1.013  |       |
| BDM  | 2006 | 271 | 1  | 55      | 17.026   | F         | 0.500   | 1.301  |       |
| N02C | 2006 | 271 | 1  | 54      | 44.128   | F         | 0.500   | 2.289  |       |
| O01C | 2006 | 271 | 1  | 54      | 45.848   | F         | 0.500   | 3.046  |       |
| FUR  | 2006 | 271 | 1  | 56      | 5.276    | F         | 0.500   | -1.127 |       |
| DJJ  | 2006 | 271 | 1  | 56      | 11.459   | F         | 0.500   | -1.652 |       |
| L02A | 2006 | 271 | 1  | 54      | 31.531   | F         | 0.500   | 2.310  |       |
| WDC  | 2006 | 271 | 1  | 54      | 51.073   | F         | 0.500   | 1.324  |       |
| VTV  | 2006 | 271 | 1  | 56      | 17.197   | F         | 0.500   | -1.107 |       |
| LRL  | 2006 | 271 | 1  | 56      | 6.451    | F         | 0.500   | -2.030 |       |
| M02C | 2006 | 271 | 1  | 54      | 43.362   | F         | 0.500   | 2.229  |       |
| PIN  | 2006 | 271 | 1  | 54      | 38.931   | F         | 0.500   | 0.328  |       |
| ELFS | 2006 | 271 | 1  | 55      | 4.818    | F         | 0.500   | 0.672  |       |
| V05C | 2006 | 271 | 1  | 55      | 48.209   | F         | 0.500   | 0.552  |       |
| MWC  | 2006 | 271 | 1  | 56      | 13.989   | F         | 0.500   | -1.781 |       |
| ISA  | 2006 | 271 | 1  | 55      | 57.830   | F         | 0.500   | -2.805 |       |
| P01C | 2006 | 271 | 1  | 54      | 54.796   | F         | 0.500   | 2.810  |       |
| PACP | 2006 | 271 | 1  | 55      | 28.205   | F         | 0.500   | 0.225  |       |
| GSC  | 2006 | 271 | 1  | 56      | 15.271   | F         | 0.500   | -1.169 |       |
| BFS  | 2006 | 271 | 1  | 56      | 17.198   | F         | 0.500   | -1.312 |       |
| ADO  | 2006 | 271 | 1  | 56      | 16.429   | F         | 0.500   | -1.354 |       |
| DGR  | 2006 | 271 | 1  | 56      | 26.135   | F         | 0.500   | -1.832 |       |
| YBH  | 2006 | 271 | 1  | 54      | 41.695   | F         | 0.500   | 1.979  |       |
| S05C | 2006 | 271 | 1  | 55      | 31.958   | F         | 0.500   | -0.796 |       |
| J02A | 2006 | 271 | 1  | 54      | 21.537   | F         | 0.500   | 1.177  |       |
| M03C | 2006 | 271 | 1  | 54      | 48.342   | F         | 0.500   | 0.315  |       |
| CWC  | 2006 | 271 | 1  | 55      | 57.477   | F         | 0.500   | -0.415 |       |
| BBR  | 2006 | 271 | 1  | 56      | 22.459   | F         | 0.500   | -1.886 |       |
| P07A | 2006 | 271 | 1  | 55      | 26.765   | F         | 0.500   | -0.316 |       |

|      |      |     |   |    |        |   |       |        |
|------|------|-----|---|----|--------|---|-------|--------|
| M04C | 2006 | 271 | 1 | 54 | 47.011 | F | 0.500 | 0.572  |
| CIA  | 2006 | 271 | 1 | 56 | 17.803 | F | 0.500 | -1.375 |
| M09A | 2006 | 271 | 1 | 55 | 23.247 | F | 0.500 | 0.037  |
| DEC  | 2006 | 271 | 1 | 56 | 12.021 | F | 0.500 | -1.035 |
| MUR  | 2006 | 271 | 1 | 56 | 25.211 | F | 0.500 | -1.710 |
| SNG5 | 2006 | 271 | 1 | 55 | 3.932  | F | 0.500 | -0.666 |
| SN14 | 2006 | 271 | 1 | 55 | 47.547 | F | 0.500 | 0.333  |
| L05A | 2006 | 271 | 1 | 54 | 53.013 | F | 0.500 | 0.621  |
| L04A | 2006 | 271 | 1 | 54 | 43.687 | F | 0.500 | 0.792  |
| Q04C | 2006 | 271 | 1 | 55 | 13.160 | F | 0.500 | 0.591  |
| SNF6 | 2006 | 271 | 1 | 55 | 7.868  | F | 0.500 | -0.751 |
| MPM  | 2006 | 271 | 1 | 56 | 4.564  | F | 0.500 | -0.941 |
| CHF  | 2006 | 271 | 1 | 56 | 13.862 | F | 0.500 | -1.096 |
| R04C | 2006 | 271 | 1 | 55 | 20.575 | F | 0.500 | -0.037 |
| RRX  | 2006 | 271 | 1 | 56 | 17.625 | F | 0.500 | -0.608 |
| MLAC | 2006 | 271 | 1 | 55 | 44.323 | F | 0.500 | 1.571  |
| T06C | 2006 | 271 | 1 | 55 | 39.669 | F | 0.500 | -0.664 |
| OSI  | 2006 | 271 | 1 | 56 | 6.062  | F | 0.500 | -1.126 |
| SN55 | 2006 | 271 | 1 | 55 | 37.441 | F | 0.500 | 0.468  |
| SUTB | 2006 | 271 | 1 | 55 | 6.303  | F | 0.500 | -0.060 |
| R08A | 2006 | 271 | 1 | 55 | 42.653 | F | 0.500 | 0.318  |
| K05A | 2006 | 271 | 1 | 54 | 47.423 | F | 0.500 | 0.778  |
| M08A | 2006 | 271 | 1 | 55 | 15.797 | F | 0.500 | -0.226 |
| RCT  | 2006 | 271 | 1 | 55 | 47.529 | F | 0.500 | -1.774 |
| SN93 | 2006 | 271 | 1 | 55 | 24.618 | F | 0.500 | 0.488  |
| SN63 | 2006 | 271 | 1 | 55 | 34.181 | F | 0.500 | -0.251 |
| O06A | 2006 | 271 | 1 | 55 | 14.437 | F | 0.500 | -0.398 |
| SNB5 | 2006 | 271 | 1 | 55 | 19.668 | F | 0.500 | 0.106  |
| ORV  | 2006 | 271 | 1 | 55 | 5.628  | F | 0.500 | -0.518 |
| TIN  | 2006 | 271 | 1 | 55 | 51.932 | F | 0.500 | 0.119  |
| SNB3 | 2006 | 271 | 1 | 55 | 18.543 | F | 0.500 | 0.601  |
| BMN  | 2006 | 271 | 1 | 55 | 32.479 | F | 0.500 | -0.380 |
| SN34 | 2006 | 271 | 1 | 55 | 43.313 | F | 0.500 | 0.382  |
| R05C | 2006 | 271 | 1 | 55 | 24.838 | F | 0.500 | 0.280  |
| SN85 | 2006 | 271 | 1 | 55 | 28.971 | F | 0.500 | 0.126  |
| S06C | 2006 | 271 | 1 | 55 | 32.594 | F | 0.500 | -0.026 |
| SN64 | 2006 | 271 | 1 | 55 | 34.553 | F | 0.500 | -0.115 |
| P06A | 2006 | 271 | 1 | 55 | 17.700 | F | 0.500 | -0.221 |
| PLM  | 2006 | 271 | 1 | 56 | 30.374 | F | 0.500 | -1.478 |
| M06C | 2006 | 271 | 1 | 55 | 1.966  | F | 0.500 | 0.276  |
| SNC6 | 2006 | 271 | 1 | 55 | 18.190 | F | 0.500 | -0.316 |
| Q09A | 2006 | 271 | 1 | 55 | 45.467 | F | 0.500 | -0.176 |
| J05A | 2006 | 271 | 1 | 54 | 40.832 | F | 0.500 | 1.220  |
| U10A | 2006 | 271 | 1 | 56 | 10.953 | F | 0.500 | -0.044 |
| EDW2 | 2006 | 271 | 1 | 56 | 9.281  | F | 0.500 | -1.261 |
| SHO  | 2006 | 271 | 1 | 56 | 15.018 | F | 0.500 | -0.694 |
| K04A | 2006 | 271 | 1 | 54 | 41.490 | F | 0.500 | 0.685  |
| SN87 | 2006 | 271 | 1 | 55 | 28.580 | F | 0.500 | 0.123  |
| K06A | 2006 | 271 | 1 | 54 | 51.342 | F | 0.500 | 0.282  |
| M05C | 2006 | 271 | 1 | 54 | 55.637 | F | 0.500 | 0.476  |
| SNG7 | 2006 | 271 | 1 | 55 | 4.639  | F | 0.500 | -0.136 |
| SNA4 | 2006 | 271 | 1 | 55 | 22.414 | F | 0.500 | 0.234  |
| J06A | 2006 | 271 | 1 | 54 | 48.822 | F | 0.500 | 0.381  |
| O10A | 2006 | 271 | 1 | 55 | 39.764 | F | 0.500 | 0.493  |
| SNC8 | 2006 | 271 | 1 | 55 | 18.105 | F | 0.500 | -0.736 |
| R06C | 2006 | 271 | 1 | 55 | 31.135 | F | 0.500 | 0.314  |
| SND5 | 2006 | 271 | 1 | 55 | 13.349 | F | 0.500 | -0.246 |
| SNC7 | 2006 | 271 | 1 | 55 | 16.727 | F | 0.500 | -0.617 |
| BEK  | 2006 | 271 | 1 | 55 | 12.272 | F | 0.500 | -0.874 |
| SNE5 | 2006 | 271 | 1 | 55 | 9.588  | F | 0.500 | -0.747 |
| SN84 | 2006 | 271 | 1 | 55 | 28.092 | F | 0.500 | -0.159 |
| P05C | 2006 | 271 | 1 | 55 | 15.145 | F | 0.500 | -0.386 |
| LAVA | 2006 | 271 | 1 | 55 | 18.709 | F | 0.500 | 0.131  |

|      |      |     |   |    |        |   |       |        |
|------|------|-----|---|----|--------|---|-------|--------|
| O04C | 2006 | 271 | 1 | 55 | 4.028  | F | 0.500 | 0.266  |
| SND4 | 2006 | 271 | 1 | 55 | 13.094 | F | 0.500 | 0.277  |
| HELL | 2006 | 271 | 1 | 55 | 47.269 | F | 0.500 | -1.258 |
| SN96 | 2006 | 271 | 1 | 55 | 26.843 | F | 0.500 | 0.238  |
| SNB6 | 2006 | 271 | 1 | 55 | 21.376 | F | 0.500 | -0.263 |
| SNE4 | 2006 | 271 | 1 | 55 | 9.484  | F | 0.500 | -0.134 |
| M10A | 2006 | 271 | 1 | 55 | 29.454 | F | 0.500 | 0.217  |
| K09A | 2006 | 271 | 1 | 55 | 11.233 | F | 0.500 | 0.058  |
| SNA7 | 2006 | 271 | 1 | 55 | 23.696 | F | 0.500 | 0.219  |
| SN75 | 2006 | 271 | 1 | 55 | 32.335 | F | 0.500 | 0.098  |
| SNB7 | 2006 | 271 | 1 | 55 | 21.021 | F | 0.500 | -0.205 |
| HEC  | 2006 | 271 | 1 | 56 | 22.874 | F | 0.500 | -0.974 |
| S08C | 2006 | 271 | 1 | 55 | 50.598 | F | 0.500 | 1.514  |
| N10A | 2006 | 271 | 1 | 55 | 36.428 | F | 0.500 | 0.646  |
| SNC5 | 2006 | 271 | 1 | 55 | 16.307 | F | 0.500 | 0.092  |
| SN97 | 2006 | 271 | 1 | 55 | 26.009 | F | 0.500 | 0.258  |
| SNE6 | 2006 | 271 | 1 | 55 | 11.196 | F | 0.500 | -0.992 |
| J07A | 2006 | 271 | 1 | 54 | 54.641 | F | 0.500 | 0.746  |
| WCN  | 2006 | 271 | 1 | 55 | 22.377 | F | 0.500 | 0.124  |
| VCS  | 2006 | 271 | 1 | 56 | 11.800 | F | 0.500 | -1.166 |
| O07A | 2006 | 271 | 1 | 55 | 21.869 | F | 0.500 | -0.286 |
| SNA8 | 2006 | 271 | 1 | 55 | 25.384 | F | 0.500 | 0.220  |
| SND7 | 2006 | 271 | 1 | 55 | 12.671 | F | 0.500 | -0.605 |
| R07C | 2006 | 271 | 1 | 55 | 37.803 | F | 0.500 | 0.331  |
| O05C | 2006 | 271 | 1 | 55 | 7.397  | F | 0.500 | -0.236 |
| SN74 | 2006 | 271 | 1 | 55 | 30.974 | F | 0.500 | -0.219 |
| I08A | 2006 | 271 | 1 | 54 | 56.332 | F | 0.500 | 0.952  |
| SNE7 | 2006 | 271 | 1 | 55 | 10.034 | F | 0.500 | -0.584 |
| I06A | 2006 | 271 | 1 | 54 | 43.076 | F | 0.500 | 0.614  |
| M07A | 2006 | 271 | 1 | 55 | 10.302 | F | 0.500 | -0.015 |
| Q08A | 2006 | 271 | 1 | 55 | 39.589 | F | 0.500 | -0.193 |
| SNB9 | 2006 | 271 | 1 | 55 | 23.294 | F | 0.500 | 0.280  |
| SN95 | 2006 | 271 | 1 | 55 | 26.113 | F | 0.500 | 0.240  |
| SNA3 | 2006 | 271 | 1 | 55 | 22.033 | F | 0.500 | 0.438  |
| CMB  | 2006 | 271 | 1 | 55 | 27.316 | F | 0.500 | 0.405  |
| SNF8 | 2006 | 271 | 1 | 55 | 9.234  | F | 0.500 | -0.578 |
| K07A | 2006 | 271 | 1 | 54 | 59.996 | F | 0.500 | 0.350  |
| SND8 | 2006 | 271 | 1 | 55 | 15.274 | F | 0.500 | -0.531 |
| J09A | 2006 | 271 | 1 | 55 | 6.577  | F | 0.500 | 0.653  |
| O09A | 2006 | 271 | 1 | 55 | 35.380 | F | 0.500 | 0.468  |
| L07A | 2006 | 271 | 1 | 55 | 4.599  | F | 0.500 | 0.257  |
| N09A | 2006 | 271 | 1 | 55 | 27.120 | F | 0.500 | 0.049  |
| N06A | 2006 | 271 | 1 | 55 | 10.020 | F | 0.500 | -0.209 |
| L09A | 2006 | 271 | 1 | 55 | 17.186 | F | 0.500 | 0.238  |
| WVOR | 2006 | 271 | 1 | 55 | 6.299  | F | 0.500 | 0.115  |
| S09A | 2006 | 271 | 1 | 55 | 54.606 | F | 0.500 | 0.322  |
| K08A | 2006 | 271 | 1 | 55 | 5.385  | F | 0.500 | 0.352  |
| N07B | 2006 | 271 | 1 | 55 | 16.447 | F | 0.500 | -0.201 |
| N08A | 2006 | 271 | 1 | 55 | 22.898 | F | 0.500 | -0.186 |
| P09A | 2006 | 271 | 1 | 55 | 40.499 | F | 0.500 | 0.096  |
| O08A | 2006 | 271 | 1 | 55 | 26.844 | F | 0.500 | 0.032  |
| I09A | 2006 | 271 | 1 | 55 | 2.474  | F | 0.500 | 1.435  |
| J08A | 2006 | 271 | 1 | 55 | 1.315  | F | 0.500 | 0.976  |
| L08A | 2006 | 271 | 1 | 55 | 10.519 | F | 0.500 | 0.172  |

|      |      |     |    |         |          |           |         |        |       |
|------|------|-----|----|---------|----------|-----------|---------|--------|-------|
| 2006 | 272  | 13  | 8  | 28.8560 | 10.87600 | -61.75600 | 53.0000 | 37     | 2.696 |
| J06A | 2006 | 272 | 13 | 26      | 34.036   | F         | 0.500   | -1.799 |       |
| M07A | 2006 | 272 | 13 | 26      | 18.952   | F         | 0.500   | -2.012 |       |
| O09A | 2006 | 272 | 13 | 25      | 56.514   | F         | 0.500   | -1.372 |       |
| PACP | 2006 | 272 | 13 | 26      | 29.747   | F         | 0.500   | -0.257 |       |
| SNC7 | 2006 | 272 | 13 | 26      | 27.103   | F         | 0.500   | 0.242  |       |
| TIN  | 2006 | 272 | 13 | 26      | 0.690    | F         | 0.500   | 1.942  |       |
| SNG5 | 2006 | 272 | 13 | 26      | 38.110   | F         | 0.500   | -0.509 |       |

|      |      |     |    |    |        |   |       |        |
|------|------|-----|----|----|--------|---|-------|--------|
| SNA7 | 2006 | 272 | 13 | 26 | 21.169 | F | 0.500 | -0.160 |
| SNF6 | 2006 | 272 | 13 | 26 | 33.788 | F | 0.500 | -0.910 |
| FUR  | 2006 | 272 | 13 | 25 | 44.636 | F | 0.500 | 1.955  |
| CHF  | 2006 | 272 | 13 | 25 | 49.560 | F | 0.500 | -0.270 |
| PIN  | 2006 | 272 | 13 | 26 | 43.867 | F | 0.500 | -0.339 |
| ISA  | 2006 | 272 | 13 | 25 | 59.381 | F | 0.500 | 1.657  |
| SNG7 | 2006 | 272 | 13 | 26 | 36.283 | F | 0.500 | -0.085 |
| MWC  | 2006 | 272 | 13 | 25 | 50.244 | F | 0.500 | 0.343  |
| CMB  | 2006 | 272 | 13 | 26 | 22.839 | F | 0.500 | -0.374 |
| HEC  | 2006 | 272 | 13 | 25 | 34.441 | F | 0.500 | 1.889  |
| S05C | 2006 | 272 | 13 | 26 | 19.902 | F | 0.500 | -0.902 |
| SNB3 | 2006 | 272 | 13 | 26 | 30.589 | F | 0.500 | 0.103  |
| N08A | 2006 | 272 | 13 | 26 | 8.051  | F | 0.500 | -0.955 |
| N07B | 2006 | 272 | 13 | 26 | 15.518 | F | 0.500 | -1.528 |
| SNA3 | 2006 | 272 | 13 | 26 | 27.489 | F | 0.500 | 0.241  |
| P05C | 2006 | 272 | 13 | 26 | 28.975 | F | 0.500 | 0.075  |
| EDW2 | 2006 | 272 | 13 | 25 | 50.706 | F | 0.500 | 0.058  |
| R06C | 2006 | 272 | 13 | 26 | 17.027 | F | 0.500 | 1.689  |
| R04C | 2006 | 272 | 13 | 26 | 29.591 | F | 0.500 | 0.430  |
| SN84 | 2006 | 272 | 13 | 26 | 21.255 | F | 0.500 | -0.105 |
| SLA  | 2006 | 272 | 13 | 25 | 47.036 | F | 0.500 | 1.323  |
| ORV  | 2006 | 272 | 13 | 26 | 37.886 | F | 0.500 | 0.101  |
| SNE6 | 2006 | 272 | 13 | 26 | 31.766 | F | 0.500 | 0.129  |
| SNA4 | 2006 | 272 | 13 | 26 | 26.021 | F | 0.500 | 0.099  |
| V04C | 2006 | 272 | 13 | 26 | 23.803 | F | 0.500 | 1.099  |
| RRX  | 2006 | 272 | 13 | 25 | 41.379 | F | 0.500 | 1.543  |
| SN74 | 2006 | 272 | 13 | 26 | 19.196 | F | 0.500 | 0.494  |
| SN85 | 2006 | 272 | 13 | 26 | 20.122 | F | 0.500 | 0.271  |
| ARV  | 2006 | 272 | 13 | 26 | 1.568  | F | 0.500 | 1.595  |
| S08C | 2006 | 272 | 13 | 26 | 1.387  | F | 0.500 | 1.448  |
| MPM  | 2006 | 272 | 13 | 25 | 49.774 | F | 0.500 | 1.276  |
| SN96 | 2006 | 272 | 13 | 26 | 21.735 | F | 0.500 | 0.470  |
| SNE5 | 2006 | 272 | 13 | 26 | 33.662 | F | 0.500 | -0.664 |
| SN95 | 2006 | 272 | 13 | 26 | 22.924 | F | 0.500 | -0.087 |
| SNB5 | 2006 | 272 | 13 | 26 | 27.030 | F | 0.500 | 0.074  |
| GSC  | 2006 | 272 | 13 | 25 | 40.748 | F | 0.500 | 1.676  |
| SN63 | 2006 | 272 | 13 | 26 | 16.915 | F | 0.500 | 0.017  |
| N09A | 2006 | 272 | 13 | 26 | 2.287  | F | 0.500 | -1.214 |
| LRL  | 2006 | 272 | 13 | 25 | 50.144 | F | 0.500 | 1.225  |
| SN75 | 2006 | 272 | 13 | 26 | 17.957 | F | 0.500 | 0.898  |
| SND4 | 2006 | 272 | 13 | 26 | 32.955 | F | 0.500 | -0.441 |
| S06C | 2006 | 272 | 13 | 26 | 17.802 | F | 0.500 | 0.140  |
| SND5 | 2006 | 272 | 13 | 26 | 31.313 | F | 0.500 | -0.244 |
| SNC6 | 2006 | 272 | 13 | 26 | 26.664 | F | 0.500 | -0.294 |
| HELL | 2006 | 272 | 13 | 26 | 6.059  | F | 0.500 | 0.045  |
| SN64 | 2006 | 272 | 13 | 26 | 16.423 | F | 0.500 | 0.696  |
| SNE4 | 2006 | 272 | 13 | 26 | 35.089 | F | 0.500 | -0.547 |
| R05C | 2006 | 272 | 13 | 26 | 22.482 | F | 0.500 | 0.193  |
| SNB6 | 2006 | 272 | 13 | 26 | 24.494 | F | 0.500 | -0.007 |
| SNC5 | 2006 | 272 | 13 | 26 | 29.235 | F | 0.500 | -0.296 |
| I09A | 2006 | 272 | 13 | 26 | 13.110 | F | 0.500 | -3.299 |
| R08A | 2006 | 272 | 13 | 26 | 1.194  | F | 0.500 | -0.103 |
| JRSC | 2006 | 272 | 13 | 26 | 41.272 | F | 0.500 | 1.030  |
| SNF8 | 2006 | 272 | 13 | 26 | 29.344 | F | 0.500 | -1.964 |
| SNCC | 2006 | 272 | 13 | 26 | 4.403  | F | 0.500 | 1.147  |
| O04C | 2006 | 272 | 13 | 26 | 35.715 | F | 0.500 | -0.447 |
| I08A | 2006 | 272 | 13 | 26 | 20.471 | F | 0.500 | -3.135 |
| DBO  | 2006 | 272 | 13 | 27 | 1.880  | F | 0.500 | -1.549 |
| GRA  | 2006 | 272 | 13 | 25 | 51.464 | F | 0.500 | 1.770  |
| K07A | 2006 | 272 | 13 | 26 | 23.075 | F | 0.500 | -2.601 |
| L02A | 2006 | 272 | 13 | 27 | 3.511  | F | 0.500 | -0.764 |
| SNB7 | 2006 | 272 | 13 | 26 | 24.440 | F | 0.500 | 0.569  |
| K02A | 2006 | 272 | 13 | 27 | 3.509  | F | 0.500 | -1.339 |

|      |      |     |    |    |        |   |       |        |
|------|------|-----|----|----|--------|---|-------|--------|
| M09A | 2006 | 272 | 13 | 26 | 3.790  | F | 0.500 | -0.773 |
| DEC  | 2006 | 272 | 13 | 25 | 53.323 | F | 0.500 | 0.658  |
| USC  | 2006 | 272 | 13 | 25 | 54.061 | F | 0.500 | 2.579  |
| O06A | 2006 | 272 | 13 | 26 | 21.308 | F | 0.500 | -2.236 |
| SDD  | 2006 | 272 | 13 | 25 | 45.326 | F | 0.500 | 1.647  |
| J02A | 2006 | 272 | 13 | 27 | 6.956  | F | 0.500 | 0.170  |
| M03C | 2006 | 272 | 13 | 26 | 46.790 | F | 0.500 | -1.634 |
| SN87 | 2006 | 272 | 13 | 26 | 18.364 | F | 0.500 | 0.600  |
| T06C | 2006 | 272 | 13 | 26 | 10.983 | F | 0.500 | -2.654 |
| L07A | 2006 | 272 | 13 | 26 | 22.201 | F | 0.500 | -2.310 |
| BFS  | 2006 | 272 | 13 | 25 | 46.364 | F | 0.500 | 0.813  |
| SN43 | 2006 | 272 | 13 | 26 | 11.781 | F | 0.500 | -1.099 |
| L09A | 2006 | 272 | 13 | 26 | 6.838  | F | 0.500 | -1.887 |
| O10A | 2006 | 272 | 13 | 25 | 50.627 | F | 0.500 | -0.905 |
| J09A | 2006 | 272 | 13 | 26 | 11.698 | F | 0.500 | -2.515 |
| VES  | 2006 | 272 | 13 | 26 | 5.286  | F | 0.500 | 1.047  |
| S04C | 2006 | 272 | 13 | 26 | 31.476 | F | 0.500 | 0.221  |
| M10A | 2006 | 272 | 13 | 25 | 55.966 | F | 0.500 | -0.477 |
| HAST | 2006 | 272 | 13 | 26 | 31.434 | F | 0.500 | 0.145  |
| CWC  | 2006 | 272 | 13 | 25 | 57.840 | F | 0.500 | 2.116  |
| JCS  | 2006 | 272 | 13 | 25 | 32.799 | F | 0.500 | 1.732  |
| N10A | 2006 | 272 | 13 | 25 | 51.969 | F | 0.500 | -1.194 |
| PLM  | 2006 | 272 | 13 | 25 | 36.702 | F | 0.500 | 1.914  |
| MNRC | 2006 | 272 | 13 | 26 | 47.000 | F | 0.500 | 1.456  |
| MCCM | 2006 | 272 | 13 | 26 | 48.708 | F | 0.500 | 0.464  |
| VCS  | 2006 | 272 | 13 | 25 | 50.863 | F | 0.500 | -0.080 |
| SVD  | 2006 | 272 | 13 | 25 | 40.414 | F | 0.500 | 1.522  |
| TOV  | 2006 | 272 | 13 | 25 | 58.198 | F | 0.500 | 0.593  |
| SN55 | 2006 | 272 | 13 | 26 | 13.437 | F | 0.500 | 0.645  |
| SN34 | 2006 | 272 | 13 | 26 | 8.276  | F | 0.500 | -0.171 |
| SN14 | 2006 | 272 | 13 | 26 | 5.263  | F | 0.500 | 0.123  |
| SHO  | 2006 | 272 | 13 | 25 | 36.331 | F | 0.500 | 1.439  |
| SN93 | 2006 | 272 | 13 | 26 | 25.681 | F | 0.500 | 0.029  |
| L08A | 2006 | 272 | 13 | 26 | 12.972 | F | 0.500 | -2.813 |
| WVOR | 2006 | 272 | 13 | 26 | 16.472 | F | 0.500 | -2.795 |
| K04A | 2006 | 272 | 13 | 26 | 48.198 | F | 0.500 | -0.331 |
| Q04C | 2006 | 272 | 13 | 26 | 36.036 | F | 0.500 | 1.127  |
| SNA8 | 2006 | 272 | 13 | 26 | 18.510 | F | 0.500 | 0.047  |
| BBR  | 2006 | 272 | 13 | 25 | 39.039 | F | 0.500 | 1.324  |
| J08A | 2006 | 272 | 13 | 26 | 18.491 | F | 0.500 | -2.365 |
| M04C | 2006 | 272 | 13 | 26 | 47.042 | F | 0.500 | -0.049 |
| P09A | 2006 | 272 | 13 | 25 | 54.206 | F | 0.500 | -1.097 |
| N06A | 2006 | 272 | 13 | 26 | 23.387 | F | 0.500 | -1.864 |
| SMM  | 2006 | 272 | 13 | 26 | 14.456 | F | 0.500 | 1.612  |
| MUR  | 2006 | 272 | 13 | 25 | 40.256 | F | 0.500 | 1.366  |
| CIA  | 2006 | 272 | 13 | 25 | 53.113 | F | 0.500 | 1.482  |
| SN97 | 2006 | 272 | 13 | 26 | 19.993 | F | 0.500 | 0.233  |
| R07C | 2006 | 272 | 13 | 26 | 11.866 | F | 0.500 | 1.783  |
| VTV  | 2006 | 272 | 13 | 25 | 43.229 | F | 0.500 | 0.545  |
| K09A | 2006 | 272 | 13 | 26 | 10.278 | F | 0.500 | -1.284 |
| DGR  | 2006 | 272 | 13 | 25 | 38.642 | F | 0.500 | 1.723  |

|      |      |     |    |         |          |           |         |        |  |
|------|------|-----|----|---------|----------|-----------|---------|--------|--|
| 2006 | 273  | 17  | 50 | 25.6151 | 46.35100 | 153.16600 | 11.0000 |        |  |
| K05A | 2006 | 273 | 18 | 8       | 25.202   | F         | 0.500   | 0.695  |  |
| SN84 | 2006 | 273 | 18 | 9       | 5.931    | F         | 0.500   | -0.091 |  |
| ELFS | 2006 | 273 | 18 | 8       | 42.558   | F         | 0.500   | 0.594  |  |
| SN96 | 2006 | 273 | 18 | 9       | 4.788    | F         | 0.500   | 0.405  |  |
| SNG5 | 2006 | 273 | 18 | 8       | 41.661   | F         | 0.500   | -0.744 |  |
| SN75 | 2006 | 273 | 18 | 9       | 10.170   | F         | 0.500   | 0.169  |  |
| BEK  | 2006 | 273 | 18 | 8       | 50.195   | F         | 0.500   | -0.754 |  |
| SN74 | 2006 | 273 | 18 | 9       | 8.958    | F         | 0.500   | 0.003  |  |
| SN34 | 2006 | 273 | 18 | 9       | 21.179   | F         | 0.500   | 0.504  |  |
| SN87 | 2006 | 273 | 18 | 9       | 6.275    | F         | 0.500   | 0.041  |  |



|      |      |     |    |    |        |   |       |        |
|------|------|-----|----|----|--------|---|-------|--------|
| M09A | 2006 | 273 | 18 | 9  | 1.075  | F | 0.500 | 0.055  |
| SNE7 | 2006 | 273 | 18 | 8  | 47.908 | F | 0.500 | -0.514 |
| O04C | 2006 | 273 | 18 | 8  | 41.715 | F | 0.500 | 0.139  |
| VTV  | 2006 | 273 | 18 | 9  | 54.795 | F | 0.500 | -1.188 |
| I06A | 2006 | 273 | 18 | 8  | 21.120 | F | 0.500 | 0.784  |
| SNG7 | 2006 | 273 | 18 | 8  | 42.273 | F | 0.500 | -0.313 |
| HEC  | 2006 | 273 | 18 | 10 | 0.671  | F | 0.500 | -0.859 |
| SNA7 | 2006 | 273 | 18 | 9  | 1.549  | F | 0.500 | 0.286  |
| S08C | 2006 | 273 | 18 | 9  | 28.460 | F | 0.500 | 1.638  |
| SN95 | 2006 | 273 | 18 | 9  | 3.906  | F | 0.500 | 0.257  |
| N09A | 2006 | 273 | 18 | 9  | 4.989  | F | 0.500 | 0.116  |
| R07C | 2006 | 273 | 18 | 9  | 15.632 | F | 0.500 | 0.400  |
| SN97 | 2006 | 273 | 18 | 9  | 3.758  | F | 0.500 | 0.224  |
| SNC7 | 2006 | 273 | 18 | 8  | 54.739 | F | 0.500 | -0.396 |
| M06C | 2006 | 273 | 18 | 8  | 39.715 | F | 0.500 | 0.201  |
| SNC8 | 2006 | 273 | 18 | 8  | 56.018 | F | 0.500 | -0.613 |
| SNB9 | 2006 | 273 | 18 | 9  | 1.052  | F | 0.500 | 0.250  |
| P06A | 2006 | 273 | 18 | 8  | 55.516 | F | 0.500 | -0.198 |
| Q09A | 2006 | 273 | 18 | 9  | 23.297 | F | 0.500 | -0.103 |
| N10A | 2006 | 273 | 18 | 9  | 14.186 | F | 0.500 | 0.617  |
| SNA8 | 2006 | 273 | 18 | 9  | 3.087  | F | 0.500 | 0.136  |
| SNE6 | 2006 | 273 | 18 | 8  | 49.115 | F | 0.500 | -0.874 |
| N06A | 2006 | 273 | 18 | 8  | 47.706 | F | 0.500 | -0.337 |
| O10A | 2006 | 273 | 18 | 9  | 17.765 | F | 0.500 | 0.716  |
| O09A | 2006 | 273 | 18 | 9  | 13.135 | F | 0.500 | 0.441  |
| SNB7 | 2006 | 273 | 18 | 8  | 58.777 | F | 0.500 | -0.233 |
| WCN  | 2006 | 273 | 18 | 9  | 0.135  | F | 0.500 | 0.095  |
| K07A | 2006 | 273 | 18 | 8  | 37.711 | F | 0.500 | 0.225  |
| K09A | 2006 | 273 | 18 | 8  | 49.135 | F | 0.500 | 0.128  |
| O05C | 2006 | 273 | 18 | 8  | 45.276 | F | 0.500 | -0.165 |
| O06A | 2006 | 273 | 18 | 8  | 52.262 | F | 0.500 | -0.377 |
| M08A | 2006 | 273 | 18 | 8  | 53.533 | F | 0.500 | -0.304 |
| J07A | 2006 | 273 | 18 | 8  | 32.618 | F | 0.500 | 0.867  |
| L09A | 2006 | 273 | 18 | 8  | 54.976 | F | 0.500 | 0.209  |
| WVOR | 2006 | 273 | 18 | 8  | 44.105 | F | 0.500 | 0.088  |
| M07A | 2006 | 273 | 18 | 8  | 48.143 | F | 0.500 | 0.006  |
| I08A | 2006 | 273 | 18 | 8  | 34.362 | F | 0.500 | 1.125  |
| L07A | 2006 | 273 | 18 | 8  | 42.353 | F | 0.500 | 0.180  |
| SND8 | 2006 | 273 | 18 | 8  | 53.042 | F | 0.500 | -0.559 |
| M10A | 2006 | 273 | 18 | 9  | 7.426  | F | 0.500 | 0.390  |
| N08A | 2006 | 273 | 18 | 9  | 0.621  | F | 0.500 | -0.267 |
| SNF8 | 2006 | 273 | 18 | 8  | 47.112 | F | 0.500 | -0.507 |
| S09A | 2006 | 273 | 18 | 9  | 32.266 | F | 0.500 | 0.241  |
| J09A | 2006 | 273 | 18 | 8  | 44.390 | F | 0.500 | 0.626  |
| N07B | 2006 | 273 | 18 | 8  | 54.276 | F | 0.500 | -0.177 |
| O07A | 2006 | 273 | 18 | 8  | 59.836 | F | 0.500 | -0.114 |
| P09A | 2006 | 273 | 18 | 9  | 18.192 | F | 0.500 | 0.018  |
| O08A | 2006 | 273 | 18 | 9  | 4.708  | F | 0.500 | 0.099  |
| I09A | 2006 | 273 | 18 | 8  | 40.297 | F | 0.500 | 1.410  |
| L08A | 2006 | 273 | 18 | 8  | 48.368 | F | 0.500 | 0.192  |
| K08A | 2006 | 273 | 18 | 8  | 43.294 | F | 0.500 | 0.424  |
| J08A | 2006 | 273 | 18 | 8  | 39.135 | F | 0.500 | 0.950  |
| MNRC | 2006 | 273 | 18 | 8  | 45.518 | F | 0.500 | 3.647  |
| V03C | 2006 | 273 | 18 | 9  | 13.938 | F | 0.500 | 0.261  |
| GASB | 2006 | 273 | 18 | 8  | 36.139 | F | 0.500 | 2.361  |
| CVS  | 2006 | 273 | 18 | 8  | 47.261 | F | 0.500 | 1.546  |
| MCCM | 2006 | 273 | 18 | 8  | 44.538 | F | 0.500 | 0.853  |
| BAK  | 2006 | 273 | 18 | 9  | 34.096 | F | 0.500 | -1.764 |
| FARB | 2006 | 273 | 18 | 8  | 46.315 | F | 0.500 | 0.125  |
| SVD  | 2006 | 273 | 18 | 9  | 59.088 | F | 0.500 | -2.434 |
| O03C | 2006 | 273 | 18 | 8  | 36.493 | F | 0.500 | 0.230  |
| O02C | 2006 | 273 | 18 | 8  | 31.216 | F | 0.500 | 2.192  |
| HAST | 2006 | 273 | 18 | 9  | 8.665  | F | 0.500 | 0.221  |

|      |      |     |    |    |        |   |       |        |
|------|------|-----|----|----|--------|---|-------|--------|
| Q03C | 2006 | 273 | 18 | 8  | 50.260 | F | 0.500 | 3.284  |
| SMM  | 2006 | 273 | 18 | 9  | 29.008 | F | 0.500 | -0.299 |
| SBC  | 2006 | 273 | 18 | 9  | 37.615 | F | 0.500 | -0.738 |
| J03A | 2006 | 273 | 18 | 8  | 4.044  | F | 0.500 | 1.034  |
| PKD  | 2006 | 273 | 18 | 9  | 20.096 | F | 0.500 | 0.127  |
| S04C | 2006 | 273 | 18 | 9  | 1.986  | F | 0.500 | 0.564  |
| N02C | 2006 | 273 | 18 | 8  | 22.041 | F | 0.500 | 2.358  |
| DBO  | 2006 | 273 | 18 | 8  | 3.686  | F | 0.500 | 0.769  |
| DJJ  | 2006 | 273 | 18 | 9  | 49.005 | F | 0.500 | -1.777 |
| SDD  | 2006 | 273 | 18 | 9  | 59.642 | F | 0.500 | -1.638 |
| SCZ2 | 2006 | 273 | 18 | 9  | 40.890 | F | 0.500 | -1.581 |
| PAS  | 2006 | 273 | 18 | 9  | 51.013 | F | 0.500 | -1.758 |
| V04C | 2006 | 273 | 18 | 9  | 20.349 | F | 0.500 | 0.729  |
| WDC  | 2006 | 273 | 18 | 8  | 28.875 | F | 0.500 | 1.293  |
| O01C | 2006 | 273 | 18 | 8  | 23.750 | F | 0.500 | 3.113  |
| HOPS | 2006 | 273 | 18 | 8  | 38.416 | F | 0.500 | 2.608  |
| I03A | 2006 | 273 | 18 | 7  | 57.151 | F | 0.500 | 1.238  |
| K02A | 2006 | 273 | 18 | 8  | 5.089  | F | 0.500 | 1.629  |
| JRSC | 2006 | 273 | 18 | 8  | 54.961 | F | 0.500 | 0.081  |
| TOV  | 2006 | 273 | 18 | 9  | 45.671 | F | 0.500 | -1.966 |
| MPP  | 2006 | 273 | 18 | 9  | 34.226 | F | 0.500 | -0.122 |
| R04C | 2006 | 273 | 18 | 8  | 58.271 | F | 0.500 | -0.113 |
| BNLO | 2006 | 273 | 18 | 8  | 57.584 | F | 0.500 | 0.020  |
| P01C | 2006 | 273 | 18 | 8  | 32.582 | F | 0.500 | 2.780  |
| L02A | 2006 | 273 | 18 | 8  | 9.272  | F | 0.500 | 2.183  |
| CIA  | 2006 | 273 | 18 | 9  | 55.184 | F | 0.500 | -1.658 |
| ARV  | 2006 | 273 | 18 | 9  | 38.411 | F | 0.500 | -1.367 |
| PIN  | 2006 | 273 | 18 | 8  | 16.679 | F | 0.500 | 0.203  |
| RPV  | 2006 | 273 | 18 | 9  | 52.442 | F | 0.500 | -1.732 |
| J02A | 2006 | 273 | 18 | 7  | 59.349 | F | 0.500 | 1.098  |
| FMP  | 2006 | 273 | 18 | 9  | 53.392 | F | 0.500 | -1.629 |
| MWC  | 2006 | 273 | 18 | 9  | 51.785 | F | 0.500 | -1.658 |
| Q04C | 2006 | 273 | 18 | 8  | 50.721 | F | 0.500 | 0.363  |
| M02C | 2006 | 273 | 18 | 8  | 21.282 | F | 0.500 | 2.299  |
| YBH  | 2006 | 273 | 18 | 8  | 19.770 | F | 0.500 | 2.199  |
| GSC  | 2006 | 273 | 18 | 9  | 53.181 | F | 0.500 | -0.947 |
| MUR  | 2006 | 273 | 18 | 10 | 2.638  | F | 0.500 | -1.938 |
| HATC | 2006 | 273 | 18 | 8  | 34.963 | F | 0.500 | 0.328  |
| ISA  | 2006 | 273 | 18 | 9  | 35.608 | F | 0.500 | -2.732 |
| P08A | 2006 | 273 | 18 | 9  | 10.214 | F | 0.500 | 0.499  |
| V05C | 2006 | 273 | 18 | 9  | 25.850 | F | 0.500 | 0.476  |
| BFS  | 2006 | 273 | 18 | 9  | 54.691 | F | 0.500 | -1.495 |
| SNB3 | 2006 | 273 | 18 | 8  | 55.945 | F | 0.500 | 0.224  |
| WENL | 2006 | 273 | 18 | 8  | 57.746 | F | 0.500 | 0.718  |
| GRA  | 2006 | 273 | 18 | 9  | 36.020 | F | 0.500 | -0.277 |
| M03C | 2006 | 273 | 18 | 8  | 26.355 | F | 0.500 | 0.481  |
| DGR  | 2006 | 273 | 18 | 10 | 3.662  | F | 0.500 | -1.960 |
| SN93 | 2006 | 273 | 18 | 9  | 2.309  | F | 0.500 | 0.404  |
| M04C | 2006 | 273 | 18 | 8  | 24.931 | F | 0.500 | 0.642  |
| SUTB | 2006 | 273 | 18 | 8  | 44.124 | F | 0.500 | -0.039 |
| CWC  | 2006 | 273 | 18 | 9  | 35.168 | F | 0.500 | -0.448 |
| ADO  | 2006 | 273 | 18 | 9  | 53.978 | F | 0.500 | -1.485 |
| SLA  | 2006 | 273 | 18 | 9  | 44.246 | F | 0.500 | -1.717 |
| OSI  | 2006 | 273 | 18 | 9  | 43.820 | F | 0.500 | -1.054 |
| SAO  | 2006 | 273 | 18 | 9  | 6.839  | F | 0.500 | 0.604  |
| SND4 | 2006 | 273 | 18 | 8  | 50.707 | F | 0.500 | 0.096  |
| SNA4 | 2006 | 273 | 18 | 9  | 0.112  | F | 0.500 | 0.153  |
| S05C | 2006 | 273 | 18 | 9  | 9.532  | F | 0.500 | -0.974 |
| LAVA | 2006 | 273 | 18 | 8  | 56.363 | F | 0.500 | 0.003  |
| JCS  | 2006 | 273 | 18 | 10 | 12.362 | F | 0.500 | -1.223 |
| PACP | 2006 | 273 | 18 | 9  | 6.178  | F | 0.500 | 0.445  |
| MPM  | 2006 | 273 | 18 | 9  | 42.243 | F | 0.500 | -0.970 |
| FUR  | 2006 | 273 | 18 | 9  | 43.209 | F | 0.500 | -0.903 |

|      |      |     |    |    |        |   |       |        |
|------|------|-----|----|----|--------|---|-------|--------|
| PHL  | 2006 | 273 | 18 | 9  | 23.530 | F | 0.500 | -0.446 |
| L04A | 2006 | 273 | 18 | 8  | 21.415 | F | 0.500 | 0.662  |
| SN43 | 2006 | 273 | 18 | 9  | 17.173 | F | 0.500 | -0.058 |
| BBR  | 2006 | 273 | 18 | 9  | 59.848 | F | 0.500 | -2.169 |
| PLM  | 2006 | 273 | 18 | 10 | 8.044  | F | 0.500 | -1.460 |
| SNE4 | 2006 | 273 | 18 | 8  | 47.302 | F | 0.500 | -0.113 |
| R05C | 2006 | 273 | 18 | 9  | 2.687  | F | 0.500 | 0.346  |
| LRL  | 2006 | 273 | 18 | 9  | 44.419 | F | 0.500 | -1.757 |
| BMN  | 2006 | 273 | 18 | 9  | 9.889  | F | 0.500 | -0.757 |
| T06C | 2006 | 273 | 18 | 9  | 17.232 | F | 0.500 | -0.843 |
| MLAC | 2006 | 273 | 18 | 9  | 21.992 | F | 0.500 | 1.490  |
| RCT  | 2006 | 273 | 18 | 9  | 25.275 | F | 0.500 | -1.751 |
| SNB5 | 2006 | 273 | 18 | 8  | 57.423 | F | 0.500 | 0.080  |
| SN63 | 2006 | 273 | 18 | 9  | 11.959 | F | 0.500 | -0.227 |
| DEC  | 2006 | 273 | 18 | 9  | 49.468 | F | 0.500 | -1.262 |
| K06A | 2006 | 273 | 18 | 8  | 29.117 | F | 0.500 | 0.201  |
| SNF6 | 2006 | 273 | 18 | 8  | 45.793 | F | 0.500 | -0.629 |
| HELL | 2006 | 273 | 18 | 9  | 25.021 | F | 0.500 | -1.232 |
| S06C | 2006 | 273 | 18 | 9  | 10.475 | F | 0.500 | 0.096  |
| EDW2 | 2006 | 273 | 18 | 9  | 46.989 | F | 0.500 | -1.239 |
| P05C | 2006 | 273 | 18 | 8  | 52.909 | F | 0.500 | -0.416 |
| SNC5 | 2006 | 273 | 18 | 8  | 54.067 | F | 0.500 | 0.061  |
| J06A | 2006 | 273 | 18 | 8  | 26.604 | F | 0.500 | 0.300  |
| U10A | 2006 | 273 | 18 | 9  | 48.431 | F | 0.500 | -0.270 |
| Q07A | 2006 | 273 | 18 | 9  | 9.883  | F | 0.500 | -0.093 |
| ORV  | 2006 | 273 | 18 | 8  | 43.203 | F | 0.500 | -0.748 |
| SND5 | 2006 | 273 | 18 | 8  | 50.963 | F | 0.500 | -0.425 |
| L05A | 2006 | 273 | 18 | 8  | 30.529 | F | 0.500 | 0.293  |
| SNE5 | 2006 | 273 | 18 | 8  | 47.307 | F | 0.500 | -0.827 |
| SN85 | 2006 | 273 | 18 | 9  | 6.811  | F | 0.500 | 0.195  |
| SNC6 | 2006 | 273 | 18 | 8  | 55.999 | F | 0.500 | -0.292 |
| CMB  | 2006 | 273 | 18 | 9  | 5.154  | F | 0.500 | 0.469  |
| J05A | 2006 | 273 | 18 | 8  | 18.724 | F | 0.500 | 1.243  |
| SN64 | 2006 | 273 | 18 | 9  | 12.433 | F | 0.500 | 0.008  |
| TIN  | 2006 | 273 | 18 | 9  | 29.786 | F | 0.500 | 0.241  |
| R08A | 2006 | 273 | 18 | 9  | 20.381 | F | 0.500 | 0.291  |
| SHO  | 2006 | 273 | 18 | 9  | 52.585 | F | 0.500 | -0.821 |
| R06C | 2006 | 273 | 18 | 9  | 9.026  | F | 0.500 | 0.437  |
| K04A | 2006 | 273 | 18 | 8  | 19.324 | F | 0.500 | 0.657  |
| M05C | 2006 | 273 | 18 | 8  | 33.494 | F | 0.500 | 0.499  |
| P10A | 2006 | 273 | 18 | 9  | 22.592 | F | 0.500 | -0.208 |
| P07A | 2006 | 273 | 18 | 9  | 4.621  | F | 0.500 | -0.250 |
| SNA3 | 2006 | 273 | 18 | 8  | 59.630 | F | 0.500 | 0.258  |
| Q08A | 2006 | 273 | 18 | 9  | 17.375 | F | 0.500 | -0.172 |
| CHF  | 2006 | 273 | 18 | 9  | 51.509 | F | 0.500 | -1.124 |
| SND7 | 2006 | 273 | 18 | 8  | 50.491 | F | 0.500 | -0.582 |

|      |      |     |   |         |          |           |         |        |       |
|------|------|-----|---|---------|----------|-----------|---------|--------|-------|
| 2006 | 274  | 9   | 6 | 11.3562 | 46.47000 | 153.24001 | 19.0000 | 39     | 9.036 |
| SND7 | 2006 | 274 | 9 | 24      | 32.917   | F         | 0.500   | -0.499 |       |
| O02C | 2006 | 274 | 9 | 24      | 13.791   | F         | 0.500   | 2.423  |       |
| GASB | 2006 | 274 | 9 | 24      | 18.926   | F         | 0.500   | 2.792  |       |
| CVS  | 2006 | 274 | 9 | 24      | 30.025   | F         | 0.500   | 1.930  |       |
| V03C | 2006 | 274 | 9 | 24      | 56.646   | F         | 0.500   | 0.537  |       |
| J03A | 2006 | 274 | 9 | 23      | 46.599   | F         | 0.500   | 1.317  |       |
| MNRC | 2006 | 274 | 9 | 24      | 28.570   | F         | 0.500   | 4.332  |       |
| SMM  | 2006 | 274 | 9 | 25      | 11.623   | F         | 0.500   | -0.118 |       |
| SVD  | 2006 | 274 | 9 | 25      | 42.009   | F         | 0.500   | -1.951 |       |
| U04C | 2006 | 274 | 9 | 24      | 57.727   | F         | 0.500   | 0.506  |       |
| BDM  | 2006 | 274 | 9 | 24      | 36.992   | F         | 0.500   | 1.108  |       |
| WDC  | 2006 | 274 | 9 | 24      | 10.890   | F         | 0.500   | 0.973  |       |
| SNB6 | 2006 | 274 | 9 | 24      | 41.420   | F         | 0.500   | -0.357 |       |
| HAST | 2006 | 274 | 9 | 24      | 51.167   | F         | 0.500   | 0.303  |       |
| N02C | 2006 | 274 | 9 | 24      | 4.705    | F         | 0.500   | 2.690  |       |

|      |      |     |   |    |        |   |       |        |
|------|------|-----|---|----|--------|---|-------|--------|
| DBO  | 2006 | 274 | 9 | 23 | 45.797 | F | 0.500 | 0.603  |
| PKD  | 2006 | 274 | 9 | 25 | 2.601  | F | 0.500 | 0.208  |
| MCCM | 2006 | 274 | 9 | 24 | 27.160 | F | 0.500 | 1.089  |
| GSC  | 2006 | 274 | 9 | 25 | 35.726 | F | 0.500 | -0.816 |
| M04C | 2006 | 274 | 9 | 24 | 6.966  | F | 0.500 | 0.373  |
| K02A | 2006 | 274 | 9 | 23 | 47.660 | F | 0.500 | 1.914  |
| MPP  | 2006 | 274 | 9 | 25 | 16.648 | F | 0.500 | -0.138 |
| I03A | 2006 | 274 | 9 | 23 | 39.494 | F | 0.500 | 1.316  |
| YBH  | 2006 | 274 | 9 | 24 | 2.111  | F | 0.500 | 2.230  |
| M03C | 2006 | 274 | 9 | 24 | 8.703  | F | 0.500 | 0.514  |
| Q03C | 2006 | 274 | 9 | 24 | 32.765 | F | 0.500 | 3.416  |
| M02C | 2006 | 274 | 9 | 24 | 3.681  | F | 0.500 | 2.381  |
| PAS  | 2006 | 274 | 9 | 25 | 33.841 | F | 0.500 | -1.377 |
| WENL | 2006 | 274 | 9 | 24 | 40.022 | F | 0.500 | 0.602  |
| O01C | 2006 | 274 | 9 | 24 | 6.032  | F | 0.500 | 3.046  |
| JRSC | 2006 | 274 | 9 | 24 | 37.295 | F | 0.500 | 0.015  |
| J02A | 2006 | 274 | 9 | 23 | 41.706 | F | 0.500 | 1.177  |
| Q04C | 2006 | 274 | 9 | 24 | 32.718 | F | 0.500 | -0.005 |
| P01C | 2006 | 274 | 9 | 24 | 15.326 | F | 0.500 | 3.159  |
| HOPS | 2006 | 274 | 9 | 24 | 20.869 | F | 0.500 | 2.689  |
| SNB3 | 2006 | 274 | 9 | 24 | 37.946 | F | 0.500 | -0.143 |
| SUTB | 2006 | 274 | 9 | 24 | 26.215 | F | 0.500 | -0.304 |
| L02A | 2006 | 274 | 9 | 23 | 51.706 | F | 0.500 | 2.314  |
| DJJ  | 2006 | 274 | 9 | 25 | 31.535 | F | 0.500 | -1.697 |
| L04A | 2006 | 274 | 9 | 24 | 3.592  | F | 0.500 | 0.544  |
| FUR  | 2006 | 274 | 9 | 25 | 25.781 | F | 0.500 | -0.725 |
| R04C | 2006 | 274 | 9 | 24 | 40.228 | F | 0.500 | -0.531 |
| SLA  | 2006 | 274 | 9 | 25 | 26.782 | F | 0.500 | -1.586 |
| MPM  | 2006 | 274 | 9 | 25 | 24.827 | F | 0.500 | -0.788 |
| V05C | 2006 | 274 | 9 | 25 | 8.053  | F | 0.500 | 0.256  |
| K04A | 2006 | 274 | 9 | 24 | 1.490  | F | 0.500 | 0.535  |
| VTV  | 2006 | 274 | 9 | 25 | 37.209 | F | 0.500 | -1.204 |
| BNLO | 2006 | 274 | 9 | 24 | 40.173 | F | 0.500 | 0.205  |
| RRX  | 2006 | 274 | 9 | 25 | 37.533 | F | 0.500 | -0.804 |
| VES  | 2006 | 274 | 9 | 25 | 11.850 | F | 0.500 | -2.689 |
| LRL  | 2006 | 274 | 9 | 25 | 27.066 | F | 0.500 | -1.527 |
| EDW2 | 2006 | 274 | 9 | 25 | 29.351 | F | 0.500 | -1.306 |
| ARV  | 2006 | 274 | 9 | 25 | 20.672 | F | 0.500 | -1.536 |
| PACP | 2006 | 274 | 9 | 24 | 48.465 | F | 0.500 | 0.329  |
| SAO  | 2006 | 274 | 9 | 24 | 49.082 | F | 0.500 | 0.439  |
| MUR  | 2006 | 274 | 9 | 25 | 45.321 | F | 0.500 | -1.703 |
| TOV  | 2006 | 274 | 9 | 25 | 28.153 | F | 0.500 | -1.932 |
| L05A | 2006 | 274 | 9 | 24 | 12.804 | F | 0.500 | 0.272  |
| CIA  | 2006 | 274 | 9 | 25 | 37.678 | F | 0.500 | -1.625 |
| JCS  | 2006 | 274 | 9 | 25 | 54.801 | F | 0.500 | -1.240 |
| DGR  | 2006 | 274 | 9 | 25 | 46.243 | F | 0.500 | -1.825 |
| PHL  | 2006 | 274 | 9 | 25 | 5.996  | F | 0.500 | -0.415 |
| BFS  | 2006 | 274 | 9 | 25 | 37.264 | F | 0.500 | -1.361 |
| MWC  | 2006 | 274 | 9 | 25 | 34.360 | F | 0.500 | -1.527 |
| SND4 | 2006 | 274 | 9 | 24 | 32.549 | F | 0.500 | -0.420 |
| ISA  | 2006 | 274 | 9 | 25 | 18.006 | F | 0.500 | -2.749 |
| SNE4 | 2006 | 274 | 9 | 24 | 29.341 | F | 0.500 | -0.430 |
| BMN  | 2006 | 274 | 9 | 24 | 51.782 | F | 0.500 | -1.180 |
| J05A | 2006 | 274 | 9 | 24 | 0.924  | F | 0.500 | 1.172  |
| LAVA | 2006 | 274 | 9 | 24 | 38.259 | F | 0.500 | -0.462 |
| SN93 | 2006 | 274 | 9 | 24 | 44.217 | F | 0.500 | -0.060 |
| ORV  | 2006 | 274 | 9 | 24 | 25.335 | F | 0.500 | -0.961 |
| PLM  | 2006 | 274 | 9 | 25 | 50.430 | F | 0.500 | -1.523 |
| RPV  | 2006 | 274 | 9 | 25 | 34.830 | F | 0.500 | -1.801 |
| P10A | 2006 | 274 | 9 | 25 | 5.049  | F | 0.500 | -0.080 |
| K05A | 2006 | 274 | 9 | 24 | 7.413  | F | 0.500 | 0.628  |
| Q08A | 2006 | 274 | 9 | 24 | 59.804 | F | 0.500 | -0.095 |
| R08A | 2006 | 274 | 9 | 25 | 2.921  | F | 0.500 | 0.470  |

|      |      |     |   |    |        |   |       |        |
|------|------|-----|---|----|--------|---|-------|--------|
| CWC  | 2006 | 274 | 9 | 25 | 17.697 | F | 0.500 | -0.314 |
| M05C | 2006 | 274 | 9 | 24 | 15.635 | F | 0.500 | 0.327  |
| K06A | 2006 | 274 | 9 | 24 | 11.423 | F | 0.500 | 0.231  |
| SNA3 | 2006 | 274 | 9 | 24 | 41.733 | F | 0.500 | -0.007 |
| OSI  | 2006 | 274 | 9 | 25 | 26.242 | F | 0.500 | -1.072 |
| J06A | 2006 | 274 | 9 | 24 | 9.100  | F | 0.500 | 0.531  |
| U10A | 2006 | 274 | 9 | 25 | 30.751 | F | 0.500 | -0.340 |
| HEC  | 2006 | 274 | 9 | 25 | 43.123 | F | 0.500 | -0.824 |
| SNA4 | 2006 | 274 | 9 | 24 | 42.062 | F | 0.500 | -0.262 |
| SNG5 | 2006 | 274 | 9 | 24 | 23.690 | F | 0.500 | -1.058 |
| Q07A | 2006 | 274 | 9 | 24 | 52.214 | F | 0.500 | -0.115 |
| ELFS | 2006 | 274 | 9 | 24 | 24.863 | F | 0.500 | 0.581  |
| SNE5 | 2006 | 274 | 9 | 24 | 29.341 | F | 0.500 | -1.144 |
| SND5 | 2006 | 274 | 9 | 24 | 32.950 | F | 0.500 | -0.792 |
| FMP  | 2006 | 274 | 9 | 25 | 35.930 | F | 0.500 | -1.546 |
| DEC  | 2006 | 274 | 9 | 25 | 31.795 | F | 0.500 | -1.381 |
| SHO  | 2006 | 274 | 9 | 25 | 35.116 | F | 0.500 | -0.692 |
| VCS  | 2006 | 274 | 9 | 25 | 31.772 | F | 0.500 | -1.311 |
| CHF  | 2006 | 274 | 9 | 25 | 33.882 | F | 0.500 | -1.194 |
| SNC5 | 2006 | 274 | 9 | 24 | 36.057 | F | 0.500 | -0.303 |
| M06C | 2006 | 274 | 9 | 24 | 21.807 | F | 0.500 | -0.013 |
| MLAC | 2006 | 274 | 9 | 25 | 4.351  | F | 0.500 | 1.470  |
| SNF6 | 2006 | 274 | 9 | 24 | 27.920 | F | 0.500 | -0.846 |
| S09A | 2006 | 274 | 9 | 25 | 14.614 | F | 0.500 | 0.224  |
| O04C | 2006 | 274 | 9 | 24 | 23.929 | F | 0.500 | 0.025  |
| T06C | 2006 | 274 | 9 | 24 | 59.309 | F | 0.500 | -1.163 |
| RCT  | 2006 | 274 | 9 | 25 | 7.564  | F | 0.500 | -1.871 |
| SN87 | 2006 | 274 | 9 | 24 | 48.516 | F | 0.500 | -0.075 |
| I06A | 2006 | 274 | 9 | 24 | 3.402  | F | 0.500 | 0.815  |
| SNB5 | 2006 | 274 | 9 | 24 | 39.416 | F | 0.500 | -0.286 |
| CMB  | 2006 | 274 | 9 | 24 | 47.213 | F | 0.500 | 0.157  |
| TIN  | 2006 | 274 | 9 | 25 | 12.453 | F | 0.500 | 0.520  |
| SN84 | 2006 | 274 | 9 | 24 | 48.036 | F | 0.500 | -0.357 |
| P05C | 2006 | 274 | 9 | 24 | 35.192 | F | 0.500 | -0.482 |
| SN14 | 2006 | 274 | 9 | 25 | 7.975  | F | 0.500 | 0.636  |
| SNB9 | 2006 | 274 | 9 | 24 | 43.379 | F | 0.500 | 0.235  |
| Q09A | 2006 | 274 | 9 | 25 | 5.723  | F | 0.500 | -0.024 |
| R07C | 2006 | 274 | 9 | 24 | 58.183 | F | 0.500 | 0.579  |
| M09A | 2006 | 274 | 9 | 24 | 43.449 | F | 0.500 | 0.141  |
| SNA8 | 2006 | 274 | 9 | 24 | 45.519 | F | 0.500 | 0.223  |
| HELL | 2006 | 274 | 9 | 25 | 7.351  | F | 0.500 | -1.304 |
| SN63 | 2006 | 274 | 9 | 24 | 54.072 | F | 0.500 | -0.501 |
| M08A | 2006 | 274 | 9 | 24 | 36.011 | F | 0.500 | -0.120 |
| R06C | 2006 | 274 | 9 | 24 | 51.470 | F | 0.500 | 0.518  |
| P06A | 2006 | 274 | 9 | 24 | 37.937 | F | 0.500 | -0.115 |
| SNC7 | 2006 | 274 | 9 | 24 | 36.921 | F | 0.500 | -0.562 |
| SN74 | 2006 | 274 | 9 | 24 | 51.066 | F | 0.500 | -0.265 |
| SN95 | 2006 | 274 | 9 | 24 | 45.958 | F | 0.500 | -0.056 |
| S06C | 2006 | 274 | 9 | 24 | 52.635 | F | 0.500 | -0.124 |
| SNG7 | 2006 | 274 | 9 | 24 | 24.491 | F | 0.500 | -0.426 |
| SNE6 | 2006 | 274 | 9 | 24 | 31.196 | F | 0.500 | -1.140 |
| SN43 | 2006 | 274 | 9 | 24 | 59.440 | F | 0.500 | -0.179 |
| SN64 | 2006 | 274 | 9 | 24 | 54.541 | F | 0.500 | -0.265 |
| N10A | 2006 | 274 | 9 | 24 | 56.521 | F | 0.500 | 0.644  |
| SNC6 | 2006 | 274 | 9 | 24 | 38.036 | F | 0.500 | -0.609 |
| WVOR | 2006 | 274 | 9 | 24 | 26.413 | F | 0.500 | 0.122  |
| K07A | 2006 | 274 | 9 | 24 | 19.966 | F | 0.500 | 0.207  |
| SNB7 | 2006 | 274 | 9 | 24 | 40.913 | F | 0.500 | -0.449 |
| SN85 | 2006 | 274 | 9 | 24 | 48.962 | F | 0.500 | -0.022 |
| S08C | 2006 | 274 | 9 | 25 | 10.768 | F | 0.500 | 1.566  |
| J07A | 2006 | 274 | 9 | 24 | 15.059 | F | 0.500 | 1.048  |
| SNA7 | 2006 | 274 | 9 | 24 | 43.785 | F | 0.500 | 0.172  |
| R05C | 2006 | 274 | 9 | 24 | 44.730 | F | 0.500 | 0.034  |

|      |      |     |   |    |        |   |       |        |
|------|------|-----|---|----|--------|---|-------|--------|
| WCN  | 2006 | 274 | 9 | 24 | 42.614 | F | 0.500 | 0.229  |
| N09A | 2006 | 274 | 9 | 24 | 47.325 | F | 0.500 | 0.152  |
| N08A | 2006 | 274 | 9 | 24 | 43.011 | F | 0.500 | -0.180 |
| N06A | 2006 | 274 | 9 | 24 | 30.104 | F | 0.500 | -0.256 |
| L09A | 2006 | 274 | 9 | 24 | 37.089 | F | 0.500 | 0.044  |
| SNC8 | 2006 | 274 | 9 | 24 | 38.545 | F | 0.500 | -0.429 |
| SN97 | 2006 | 274 | 9 | 24 | 45.998 | F | 0.500 | 0.110  |
| SNE7 | 2006 | 274 | 9 | 24 | 30.281 | F | 0.500 | -0.481 |
| M10A | 2006 | 274 | 9 | 24 | 49.645 | F | 0.500 | 0.320  |
| M07A | 2006 | 274 | 9 | 24 | 30.375 | F | 0.500 | -0.062 |
| SN75 | 2006 | 274 | 9 | 24 | 52.423 | F | 0.500 | 0.049  |
| SND8 | 2006 | 274 | 9 | 24 | 35.366 | F | 0.500 | -0.575 |
| O06A | 2006 | 274 | 9 | 24 | 34.822 | F | 0.500 | -0.145 |
| O05C | 2006 | 274 | 9 | 24 | 27.496 | F | 0.500 | -0.281 |
| SN34 | 2006 | 274 | 9 | 25 | 3.694  | F | 0.500 | 0.633  |
| L07A | 2006 | 274 | 9 | 24 | 24.622 | F | 0.500 | 0.166  |
| P09A | 2006 | 274 | 9 | 25 | 0.553  | F | 0.500 | 0.048  |
| SN96 | 2006 | 274 | 9 | 24 | 46.835 | F | 0.500 | 0.091  |
| K09A | 2006 | 274 | 9 | 24 | 31.484 | F | 0.500 | 0.210  |
| I08A | 2006 | 274 | 9 | 24 | 16.689 | F | 0.500 | 1.205  |
| O07A | 2006 | 274 | 9 | 24 | 42.143 | F | 0.500 | -0.130 |
| BEK  | 2006 | 274 | 9 | 24 | 32.815 | F | 0.500 | -0.471 |
| J09A | 2006 | 274 | 9 | 24 | 26.726 | F | 0.500 | 0.709  |
| N07B | 2006 | 274 | 9 | 24 | 36.570 | F | 0.500 | -0.192 |
| O08A | 2006 | 274 | 9 | 24 | 47.009 | F | 0.500 | 0.084  |
| K08A | 2006 | 274 | 9 | 24 | 25.645 | F | 0.500 | 0.511  |
| I09A | 2006 | 274 | 9 | 24 | 22.370 | F | 0.500 | 1.244  |
| J08A | 2006 | 274 | 9 | 24 | 21.473 | F | 0.500 | 1.033  |
| SNF8 | 2006 | 274 | 9 | 24 | 29.430 | F | 0.500 | -0.525 |
| L08A | 2006 | 274 | 9 | 24 | 30.630 | F | 0.500 | 0.176  |

|      |      |     |    |         |          |           |        |        |       |
|------|------|-----|----|---------|----------|-----------|--------|--------|-------|
| 2006 | 286  | 13  | 47 | 42.1037 | 46.23800 | 153.27699 | 4.0000 | 40     | 2.924 |
| S09A | 2006 | 286 | 14 | 6       | 52.217   | F         | 0.500  | 1.961  |       |
| PAS  | 2006 | 286 | 14 | 7       | 7.225    | F         | 0.500  | -3.685 |       |
| O03C | 2006 | 286 | 14 | 5       | 53.262   | F         | 0.500  | -1.197 |       |
| SND7 | 2006 | 286 | 14 | 6       | 7.030    | F         | 0.500  | -2.254 |       |
| MWC  | 2006 | 286 | 14 | 7       | 8.151    | F         | 0.500  | -3.432 |       |
| O02C | 2006 | 286 | 14 | 5       | 47.775   | F         | 0.500  | 0.569  |       |
| SMM  | 2006 | 286 | 14 | 6       | 45.358   | F         | 0.500  | -2.077 |       |
| VES  | 2006 | 286 | 14 | 6       | 45.981   | F         | 0.500  | -4.300 |       |
| P07A | 2006 | 286 | 14 | 6       | 21.389   | F         | 0.500  | -1.724 |       |
| O01C | 2006 | 286 | 14 | 5       | 40.389   | F         | 0.500  | 1.592  |       |
| GSC  | 2006 | 286 | 14 | 7       | 9.644    | F         | 0.500  | -2.676 |       |
| V05C | 2006 | 286 | 14 | 6       | 42.564   | F         | 0.500  | -0.947 |       |
| BDM  | 2006 | 286 | 14 | 6       | 11.444   | F         | 0.500  | -0.203 |       |
| CWC  | 2006 | 286 | 14 | 6       | 51.680   | F         | 0.500  | -2.118 |       |
| S04C | 2006 | 286 | 14 | 6       | 18.508   | F         | 0.500  | -1.059 |       |
| JCC  | 2006 | 286 | 14 | 5       | 33.194   | F         | 0.500  | 1.249  |       |
| WENL | 2006 | 286 | 14 | 6       | 14.313   | F         | 0.500  | -0.857 |       |
| P08A | 2006 | 286 | 14 | 6       | 27.202   | F         | 0.500  | -0.770 |       |
| DJJ  | 2006 | 286 | 14 | 7       | 5.410    | F         | 0.500  | -3.501 |       |
| BFS  | 2006 | 286 | 14 | 7       | 11.315   | F         | 0.500  | -3.022 |       |
| CIA  | 2006 | 286 | 14 | 7       | 11.576   | F         | 0.500  | -3.382 |       |
| WDC  | 2006 | 286 | 14 | 5       | 45.401   | F         | 0.500  | -0.377 |       |
| M04C | 2006 | 286 | 14 | 5       | 41.751   | F         | 0.500  | -0.781 |       |
| ISA  | 2006 | 286 | 14 | 6       | 52.295   | F         | 0.500  | -4.204 |       |
| ARV  | 2006 | 286 | 14 | 6       | 54.880   | F         | 0.500  | -3.038 |       |
| SHO  | 2006 | 286 | 14 | 7       | 9.172    | F         | 0.500  | -2.444 |       |
| R05C | 2006 | 286 | 14 | 6       | 19.212   | F         | 0.500  | -1.329 |       |
| RRX  | 2006 | 286 | 14 | 7       | 11.578   | F         | 0.500  | -2.517 |       |
| P01C | 2006 | 286 | 14 | 5       | 49.063   | F         | 0.500  | 1.107  |       |
| ADO  | 2006 | 286 | 14 | 7       | 10.713   | F         | 0.500  | -2.908 |       |
| DEC  | 2006 | 286 | 14 | 7       | 5.879    | F         | 0.500  | -2.987 |       |

|      |      |     |    |   |        |   |       |        |
|------|------|-----|----|---|--------|---|-------|--------|
| N02C | 2006 | 286 | 14 | 5 | 38.658 | F | 0.500 | 0.786  |
| YBH  | 2006 | 286 | 14 | 5 | 36.573 | F | 0.500 | 0.773  |
| HELL | 2006 | 286 | 14 | 6 | 41.670 | F | 0.500 | -2.758 |
| Q07A | 2006 | 286 | 14 | 6 | 26.388 | F | 0.500 | -1.811 |
| R04C | 2006 | 286 | 14 | 6 | 15.069 | F | 0.500 | -1.490 |
| BEK  | 2006 | 286 | 14 | 6 | 6.794  | F | 0.500 | -2.376 |
| PHL  | 2006 | 286 | 14 | 6 | 39.920 | F | 0.500 | -2.168 |
| J03A | 2006 | 286 | 14 | 5 | 20.838 | F | 0.500 | -0.440 |
| HATC | 2006 | 286 | 14 | 5 | 51.815 | F | 0.500 | -1.047 |
| I03A | 2006 | 286 | 14 | 5 | 13.707 | F | 0.500 | -0.485 |
| SN34 | 2006 | 286 | 14 | 6 | 37.743 | F | 0.500 | -1.117 |
| SLA  | 2006 | 286 | 14 | 7 | 0.812  | F | 0.500 | -3.341 |
| M02C | 2006 | 286 | 14 | 5 | 37.973 | F | 0.500 | 0.774  |
| SN97 | 2006 | 286 | 14 | 6 | 20.442 | F | 0.500 | -1.299 |
| SN43 | 2006 | 286 | 14 | 6 | 33.829 | F | 0.500 | -1.579 |
| DBO  | 2006 | 286 | 14 | 5 | 20.567 | F | 0.500 | -0.607 |
| L02A | 2006 | 286 | 14 | 5 | 26.169 | F | 0.500 | 0.859  |
| Q11A | 2006 | 286 | 14 | 6 | 50.110 | F | 0.500 | -3.157 |
| Q09A | 2006 | 286 | 14 | 6 | 39.931 | F | 0.500 | -1.725 |
| Q04C | 2006 | 286 | 14 | 6 | 7.574  | F | 0.500 | -0.960 |
| L05A | 2006 | 286 | 14 | 5 | 47.326 | F | 0.500 | -1.179 |
| U10A | 2006 | 286 | 14 | 7 | 5.227  | F | 0.500 | -1.695 |
| O06A | 2006 | 286 | 14 | 6 | 9.028  | F | 0.500 | -1.852 |
| SNC6 | 2006 | 286 | 14 | 6 | 12.776 | F | 0.500 | -1.718 |
| K02A | 2006 | 286 | 14 | 5 | 21.806 | F | 0.500 | 0.103  |
| OSI  | 2006 | 286 | 14 | 7 | 0.431  | F | 0.500 | -2.577 |
| MPP  | 2006 | 286 | 14 | 6 | 50.670 | F | 0.500 | -1.793 |
| LRL  | 2006 | 286 | 14 | 7 | 0.869  | F | 0.500 | -3.479 |
| V11A | 2006 | 286 | 14 | 7 | 17.029 | F | 0.500 | -1.655 |
| N07B | 2006 | 286 | 14 | 6 | 10.924 | F | 0.500 | -1.804 |
| P06A | 2006 | 286 | 14 | 6 | 12.169 | F | 0.500 | -1.772 |
| U11A | 2006 | 286 | 14 | 7 | 12.427 | F | 0.500 | -1.709 |
| SN63 | 2006 | 286 | 14 | 6 | 28.767 | F | 0.500 | -1.593 |
| CMB  | 2006 | 286 | 14 | 6 | 21.908 | F | 0.500 | -0.952 |
| S08C | 2006 | 286 | 14 | 6 | 45.244 | F | 0.500 | 0.213  |
| R06C | 2006 | 286 | 14 | 6 | 25.509 | F | 0.500 | -1.284 |
| S05C | 2006 | 286 | 14 | 6 | 26.170 | F | 0.500 | -2.493 |
| VCS  | 2006 | 286 | 14 | 7 | 5.872  | F | 0.500 | -2.919 |
| ORV  | 2006 | 286 | 14 | 5 | 59.972 | F | 0.500 | -2.170 |
| SNC7 | 2006 | 286 | 14 | 6 | 11.274 | F | 0.500 | -2.071 |
| K04A | 2006 | 286 | 14 | 5 | 36.219 | F | 0.500 | -0.717 |
| SNE7 | 2006 | 286 | 14 | 6 | 4.599  | F | 0.500 | -2.035 |
| SN93 | 2006 | 286 | 14 | 6 | 19.261 | F | 0.500 | -0.819 |
| EDW2 | 2006 | 286 | 14 | 7 | 3.520  | F | 0.500 | -2.864 |
| SN75 | 2006 | 286 | 14 | 6 | 26.889 | F | 0.500 | -1.301 |
| SND4 | 2006 | 286 | 14 | 6 | 7.520  | F | 0.500 | -1.275 |
| BBR  | 2006 | 286 | 14 | 7 | 16.488 | F | 0.500 | -3.694 |
| SNB7 | 2006 | 286 | 14 | 6 | 15.460 | F | 0.500 | -1.758 |
| K05A | 2006 | 286 | 14 | 5 | 42.166 | F | 0.500 | -0.626 |
| SN96 | 2006 | 286 | 14 | 6 | 21.308 | F | 0.500 | -1.269 |
| SNA4 | 2006 | 286 | 14 | 6 | 16.873 | F | 0.500 | -1.271 |
| M03C | 2006 | 286 | 14 | 5 | 43.006 | F | 0.500 | -1.089 |
| MPM  | 2006 | 286 | 14 | 6 | 58.759 | F | 0.500 | -2.645 |
| SNC8 | 2006 | 286 | 14 | 6 | 12.763 | F | 0.500 | -2.089 |
| SN87 | 2006 | 286 | 14 | 6 | 22.859 | F | 0.500 | -1.583 |
| L04A | 2006 | 286 | 14 | 5 | 38.395 | F | 0.500 | -0.612 |
| SN85 | 2006 | 286 | 14 | 6 | 23.479 | F | 0.500 | -1.326 |
| M06C | 2006 | 286 | 14 | 5 | 56.596 | F | 0.500 | -1.173 |
| SNA7 | 2006 | 286 | 14 | 6 | 18.335 | F | 0.500 | -1.139 |
| SUTB | 2006 | 286 | 14 | 6 | 0.629  | F | 0.500 | -1.710 |
| SN84 | 2006 | 286 | 14 | 6 | 22.492 | F | 0.500 | -1.712 |
| Q08A | 2006 | 286 | 14 | 6 | 33.896 | F | 0.500 | -1.891 |
| SNG5 | 2006 | 286 | 14 | 5 | 58.533 | F | 0.500 | -2.069 |

|      |      |     |    |   |        |   |       |        |
|------|------|-----|----|---|--------|---|-------|--------|
| SNB3 | 2006 | 286 | 14 | 6 | 12.949 | F | 0.500 | -0.952 |
| SN64 | 2006 | 286 | 14 | 6 | 28.997 | F | 0.500 | -1.610 |
| S06C | 2006 | 286 | 14 | 6 | 26.986 | F | 0.500 | -1.571 |
| SNF8 | 2006 | 286 | 14 | 6 | 3.809  | F | 0.500 | -2.027 |
| J02A | 2006 | 286 | 14 | 5 | 16.281 | F | 0.500 | -0.226 |
| CHF  | 2006 | 286 | 14 | 7 | 8.078  | F | 0.500 | -2.701 |
| SNE4 | 2006 | 286 | 14 | 6 | 4.116  | F | 0.500 | -1.485 |
| HEC  | 2006 | 286 | 14 | 7 | 17.134 | F | 0.500 | -2.583 |
| LAVA | 2006 | 286 | 14 | 6 | 13.227 | F | 0.500 | -1.323 |
| R08A | 2006 | 286 | 14 | 6 | 36.936 | F | 0.500 | -1.381 |
| SNA8 | 2006 | 286 | 14 | 6 | 19.681 | F | 0.500 | -1.488 |
| R07C | 2006 | 286 | 14 | 6 | 32.063 | F | 0.500 | -1.366 |
| M05C | 2006 | 286 | 14 | 5 | 50.266 | F | 0.500 | -0.973 |
| SNF6 | 2006 | 286 | 14 | 6 | 2.423  | F | 0.500 | -2.202 |
| SN95 | 2006 | 286 | 14 | 6 | 20.569 | F | 0.500 | -1.266 |
| SND5 | 2006 | 286 | 14 | 6 | 7.734  | F | 0.500 | -1.848 |
| M07A | 2006 | 286 | 14 | 6 | 4.853  | F | 0.500 | -1.567 |
| VTV  | 2006 | 286 | 14 | 7 | 11.432 | F | 0.500 | -2.714 |
| O09A | 2006 | 286 | 14 | 6 | 30.051 | F | 0.500 | -0.926 |
| O05C | 2006 | 286 | 14 | 6 | 1.966  | F | 0.500 | -1.690 |
| J05A | 2006 | 286 | 14 | 5 | 35.696 | F | 0.500 | -0.082 |
| O04C | 2006 | 286 | 14 | 5 | 58.411 | F | 0.500 | -1.385 |
| SNE6 | 2006 | 286 | 14 | 6 | 5.545  | F | 0.500 | -2.645 |
| WCN  | 2006 | 286 | 14 | 6 | 16.682 | F | 0.500 | -1.578 |
| SND8 | 2006 | 286 | 14 | 6 | 9.788  | F | 0.500 | -2.035 |
| SNC5 | 2006 | 286 | 14 | 6 | 10.837 | F | 0.500 | -1.365 |
| N06A | 2006 | 286 | 14 | 6 | 4.386  | F | 0.500 | -1.909 |
| SN74 | 2006 | 286 | 14 | 6 | 25.669 | F | 0.500 | -1.468 |
| P09A | 2006 | 286 | 14 | 6 | 34.894 | F | 0.500 | -1.553 |
| O07A | 2006 | 286 | 14 | 6 | 16.520 | F | 0.500 | -1.688 |
| L07A | 2006 | 286 | 14 | 5 | 59.225 | F | 0.500 | -1.245 |
| SNA3 | 2006 | 286 | 14 | 6 | 16.385 | F | 0.500 | -1.165 |
| SNE5 | 2006 | 286 | 14 | 6 | 3.928  | F | 0.500 | -2.400 |
| O08A | 2006 | 286 | 14 | 6 | 21.559 | F | 0.500 | -1.323 |
| SNG7 | 2006 | 286 | 14 | 5 | 59.012 | F | 0.500 | -1.786 |
| SNB9 | 2006 | 286 | 14 | 6 | 17.853 | F | 0.500 | -1.174 |
| S09A | 2006 | 286 | 14 | 6 | 48.924 | F | 0.500 | -1.332 |
| V04C | 2006 | 286 | 14 | 6 | 39.846 | F | 0.500 | 2.117  |
| P07A | 2006 | 286 | 14 | 6 | 24.682 | F | 0.500 | 1.569  |
| P08A | 2006 | 286 | 14 | 6 | 30.495 | F | 0.500 | 2.523  |
| WENL | 2006 | 286 | 14 | 6 | 17.606 | F | 0.500 | 2.436  |
| S04C | 2006 | 286 | 14 | 6 | 21.851 | F | 0.500 | 2.284  |
| CIA  | 2006 | 286 | 14 | 7 | 14.869 | F | 0.500 | -0.089 |
| BFS  | 2006 | 286 | 14 | 7 | 14.608 | F | 0.500 | 0.271  |
| DJJ  | 2006 | 286 | 14 | 7 | 8.753  | F | 0.500 | -0.158 |
| P01C | 2006 | 286 | 14 | 5 | 52.406 | F | 0.500 | 4.450  |
| ARV  | 2006 | 286 | 14 | 6 | 58.223 | F | 0.500 | 0.305  |
| WDC  | 2006 | 286 | 14 | 5 | 48.644 | F | 0.500 | 2.866  |
| YBH  | 2006 | 286 | 14 | 5 | 39.816 | F | 0.500 | 4.016  |
| N02C | 2006 | 286 | 14 | 5 | 42.001 | F | 0.500 | 4.130  |
| GRA  | 2006 | 286 | 14 | 6 | 55.767 | F | 0.500 | 1.257  |
| R05C | 2006 | 286 | 14 | 6 | 22.505 | F | 0.500 | 1.964  |
| TIN  | 2006 | 286 | 14 | 6 | 49.417 | F | 0.500 | 1.674  |
| BEK  | 2006 | 286 | 14 | 6 | 10.137 | F | 0.500 | 0.967  |
| J03A | 2006 | 286 | 14 | 5 | 24.181 | F | 0.500 | 2.903  |
| HELL | 2006 | 286 | 14 | 6 | 44.913 | F | 0.500 | 0.485  |
| SHO  | 2006 | 286 | 14 | 7 | 12.465 | F | 0.500 | 0.849  |
| Q07A | 2006 | 286 | 14 | 6 | 29.681 | F | 0.500 | 1.482  |
| RRX  | 2006 | 286 | 14 | 7 | 14.821 | F | 0.500 | 0.726  |
| R04C | 2006 | 286 | 14 | 6 | 18.362 | F | 0.500 | 1.803  |
| HATC | 2006 | 286 | 14 | 5 | 55.158 | F | 0.500 | 2.296  |
| I03A | 2006 | 286 | 14 | 5 | 17.050 | F | 0.500 | 2.858  |
| SLA  | 2006 | 286 | 14 | 7 | 4.105  | F | 0.500 | -0.048 |



|      |      |     |    |   |        |   |       |        |
|------|------|-----|----|---|--------|---|-------|--------|
| DEC  | 2006 | 286 | 14 | 7 | 9.272  | F | 0.500 | 0.406  |
| M02C | 2006 | 286 | 14 | 5 | 41.216 | F | 0.500 | 4.017  |
| DBO  | 2006 | 286 | 14 | 5 | 23.910 | F | 0.500 | 2.736  |
| PHL  | 2006 | 286 | 14 | 6 | 43.213 | F | 0.500 | 1.125  |
| SN34 | 2006 | 286 | 14 | 6 | 41.036 | F | 0.500 | 2.176  |
| L02A | 2006 | 286 | 14 | 5 | 29.512 | F | 0.500 | 4.202  |
| Q09A | 2006 | 286 | 14 | 6 | 43.274 | F | 0.500 | 1.618  |
| SN43 | 2006 | 286 | 14 | 6 | 37.172 | F | 0.500 | 1.764  |
| Q11A | 2006 | 286 | 14 | 6 | 53.453 | F | 0.500 | 0.186  |
| SN97 | 2006 | 286 | 14 | 6 | 23.785 | F | 0.500 | 2.044  |
| U10A | 2006 | 286 | 14 | 7 | 8.470  | F | 0.500 | 1.548  |
| K02A | 2006 | 286 | 14 | 5 | 25.099 | F | 0.500 | 3.396  |
| O06A | 2006 | 286 | 14 | 6 | 12.321 | F | 0.500 | 1.441  |
| L05A | 2006 | 286 | 14 | 5 | 50.568 | F | 0.500 | 2.063  |
| Q04C | 2006 | 286 | 14 | 6 | 10.867 | F | 0.500 | 2.333  |
| SNC6 | 2006 | 286 | 14 | 6 | 16.019 | F | 0.500 | 1.525  |
| P06A | 2006 | 286 | 14 | 6 | 15.412 | F | 0.500 | 1.471  |
| LRL  | 2006 | 286 | 14 | 7 | 4.212  | F | 0.500 | -0.136 |
| V11A | 2006 | 286 | 14 | 7 | 20.371 | F | 0.500 | 1.687  |
| MPP  | 2006 | 286 | 14 | 6 | 53.963 | F | 0.500 | 1.500  |
| N07B | 2006 | 286 | 14 | 6 | 14.267 | F | 0.500 | 1.539  |
| OSI  | 2006 | 286 | 14 | 7 | 3.724  | F | 0.500 | 0.716  |
| U11A | 2006 | 286 | 14 | 7 | 15.670 | F | 0.500 | 1.534  |
| S08C | 2006 | 286 | 14 | 6 | 48.537 | F | 0.500 | 3.507  |
| SNC7 | 2006 | 286 | 14 | 6 | 14.567 | F | 0.500 | 1.222  |
| SN63 | 2006 | 286 | 14 | 6 | 32.060 | F | 0.500 | 1.700  |
| R06C | 2006 | 286 | 14 | 6 | 28.802 | F | 0.500 | 2.009  |
| K04A | 2006 | 286 | 14 | 5 | 39.512 | F | 0.500 | 2.576  |
| SNE7 | 2006 | 286 | 14 | 6 | 7.942  | F | 0.500 | 1.308  |
| CMB  | 2006 | 286 | 14 | 6 | 25.250 | F | 0.500 | 2.390  |
| VCS  | 2006 | 286 | 14 | 7 | 9.165  | F | 0.500 | 0.374  |
| ORV  | 2006 | 286 | 14 | 6 | 3.265  | F | 0.500 | 1.123  |
| K05A | 2006 | 286 | 14 | 5 | 45.409 | F | 0.500 | 2.617  |
| SNC8 | 2006 | 286 | 14 | 6 | 16.056 | F | 0.500 | 1.204  |
| EDW2 | 2006 | 286 | 14 | 7 | 6.813  | F | 0.500 | 0.429  |
| MPM  | 2006 | 286 | 14 | 7 | 2.002  | F | 0.500 | 0.598  |
| SN75 | 2006 | 286 | 14 | 6 | 30.232 | F | 0.500 | 2.042  |
| M03C | 2006 | 286 | 14 | 5 | 46.299 | F | 0.500 | 2.204  |
| S05C | 2006 | 286 | 14 | 6 | 29.513 | F | 0.500 | 0.850  |
| L04A | 2006 | 286 | 14 | 5 | 41.688 | F | 0.500 | 2.681  |
| SNB7 | 2006 | 286 | 14 | 6 | 18.753 | F | 0.500 | 1.535  |
| SND4 | 2006 | 286 | 14 | 6 | 10.863 | F | 0.500 | 2.068  |
| SN93 | 2006 | 286 | 14 | 6 | 22.554 | F | 0.500 | 2.474  |
| SN87 | 2006 | 286 | 14 | 6 | 26.152 | F | 0.500 | 1.711  |
| SN96 | 2006 | 286 | 14 | 6 | 24.651 | F | 0.500 | 2.073  |
| BBR  | 2006 | 286 | 14 | 7 | 19.831 | F | 0.500 | -0.351 |
| Q08A | 2006 | 286 | 14 | 6 | 37.189 | F | 0.500 | 1.402  |
| SNG5 | 2006 | 286 | 14 | 6 | 1.826  | F | 0.500 | 1.224  |
| M06C | 2006 | 286 | 14 | 5 | 59.889 | F | 0.500 | 2.120  |
| SNF8 | 2006 | 286 | 14 | 6 | 7.052  | F | 0.500 | 1.216  |
| SUTB | 2006 | 286 | 14 | 6 | 3.922  | F | 0.500 | 1.583  |
| J02A | 2006 | 286 | 14 | 5 | 19.624 | F | 0.500 | 3.117  |
| S06C | 2006 | 286 | 14 | 6 | 30.329 | F | 0.500 | 1.772  |
| HEC  | 2006 | 286 | 14 | 7 | 20.427 | F | 0.500 | 0.710  |
| SNA4 | 2006 | 286 | 14 | 6 | 20.116 | F | 0.500 | 1.972  |
| SNA7 | 2006 | 286 | 14 | 6 | 21.628 | F | 0.500 | 2.154  |
| SN85 | 2006 | 286 | 14 | 6 | 26.772 | F | 0.500 | 1.967  |
| R08A | 2006 | 286 | 14 | 6 | 40.229 | F | 0.500 | 1.912  |
| SN64 | 2006 | 286 | 14 | 6 | 32.340 | F | 0.500 | 1.733  |
| SN84 | 2006 | 286 | 14 | 6 | 25.785 | F | 0.500 | 1.581  |
| SNB3 | 2006 | 286 | 14 | 6 | 16.242 | F | 0.500 | 2.341  |
| SNA8 | 2006 | 286 | 14 | 6 | 22.974 | F | 0.500 | 1.805  |
| SNE4 | 2006 | 286 | 14 | 6 | 7.359  | F | 0.500 | 1.757  |

|      |      |     |    |   |        |   |       |       |
|------|------|-----|----|---|--------|---|-------|-------|
| CHF  | 2006 | 286 | 14 | 7 | 11.371 | F | 0.500 | 0.592 |
| LAVA | 2006 | 286 | 14 | 6 | 16.520 | F | 0.500 | 1.970 |
| R07C | 2006 | 286 | 14 | 6 | 35.356 | F | 0.500 | 1.927 |
| O09A | 2006 | 286 | 14 | 6 | 33.343 | F | 0.500 | 2.366 |
| O04C | 2006 | 286 | 14 | 6 | 1.704  | F | 0.500 | 1.908 |
| J05A | 2006 | 286 | 14 | 5 | 38.939 | F | 0.500 | 3.161 |
| M05C | 2006 | 286 | 14 | 5 | 53.509 | F | 0.500 | 2.270 |
| M07A | 2006 | 286 | 14 | 6 | 8.146  | F | 0.500 | 1.726 |
| SNF6 | 2006 | 286 | 14 | 6 | 5.766  | F | 0.500 | 1.141 |
| SND5 | 2006 | 286 | 14 | 6 | 11.027 | F | 0.500 | 1.445 |
| N06A | 2006 | 286 | 14 | 6 | 7.729  | F | 0.500 | 1.434 |
| WCN  | 2006 | 286 | 14 | 6 | 19.975 | F | 0.500 | 1.715 |
| SN95 | 2006 | 286 | 14 | 6 | 23.812 | F | 0.500 | 1.977 |
| VTV  | 2006 | 286 | 14 | 7 | 14.675 | F | 0.500 | 0.529 |
| P09A | 2006 | 286 | 14 | 6 | 38.187 | F | 0.500 | 1.740 |
| O05C | 2006 | 286 | 14 | 6 | 5.309  | F | 0.500 | 1.653 |
| SND8 | 2006 | 286 | 14 | 6 | 13.081 | F | 0.500 | 1.258 |
| SNC5 | 2006 | 286 | 14 | 6 | 14.180 | F | 0.500 | 1.978 |
| O07A | 2006 | 286 | 14 | 6 | 19.813 | F | 0.500 | 1.605 |
| L07A | 2006 | 286 | 14 | 6 | 2.518  | F | 0.500 | 2.048 |
| SN74 | 2006 | 286 | 14 | 6 | 28.912 | F | 0.500 | 1.775 |
| SNE5 | 2006 | 286 | 14 | 6 | 7.221  | F | 0.500 | 0.893 |
| SNA3 | 2006 | 286 | 14 | 6 | 19.678 | F | 0.500 | 2.128 |
| N08A | 2006 | 286 | 14 | 6 | 20.842 | F | 0.500 | 1.665 |
| SNE6 | 2006 | 286 | 14 | 6 | 8.888  | F | 0.500 | 0.698 |
| O08A | 2006 | 286 | 14 | 6 | 24.902 | F | 0.500 | 2.020 |
| SNG7 | 2006 | 286 | 14 | 6 | 2.305  | F | 0.500 | 1.507 |
| SNB9 | 2006 | 286 | 14 | 6 | 21.096 | F | 0.500 | 2.069 |
| M01C | 2006 | 286 | 14 | 5 | 24.164 | F | 0.500 | 0.844 |

|      |      |     |    |         |          |           |         |        |       |
|------|------|-----|----|---------|----------|-----------|---------|--------|-------|
| 2006 | 337  | 20  | 52 | 20.3772 | 13.99400 | -91.20700 | 61.2000 | 41     | 4.467 |
| MWC  | 2006 | 337 | 21 | 3       | 41.619   | F         | 0.500   | -0.412 |       |
| SVD  | 2006 | 337 | 21 | 3       | 30.510   | F         | 0.500   | 0.072  |       |
| HOPS | 2006 | 337 | 21 | 5       | 14.788   | F         | 0.500   | 1.347  |       |
| M07A | 2006 | 337 | 21 | 4       | 58.112   | F         | 0.500   | -0.619 |       |
| ARV  | 2006 | 337 | 21 | 3       | 56.770   | F         | 0.500   | -0.878 |       |
| EDW2 | 2006 | 337 | 21 | 3       | 45.109   | F         | 0.500   | -1.777 |       |
| SLA  | 2006 | 337 | 21 | 3       | 48.085   | F         | 0.500   | -0.441 |       |
| SN43 | 2006 | 337 | 21 | 4       | 23.071   | F         | 0.500   | -1.697 |       |
| FUR  | 2006 | 337 | 21 | 3       | 49.384   | F         | 0.500   | -0.042 |       |
| Q04C | 2006 | 337 | 21 | 4       | 55.728   | F         | 0.500   | 0.273  |       |
| SHO  | 2006 | 337 | 21 | 3       | 37.837   | F         | 0.500   | -0.353 |       |
| CVS  | 2006 | 337 | 21 | 5       | 1.995    | F         | 0.500   | -0.085 |       |
| MPP  | 2006 | 337 | 21 | 4       | 5.785    | F         | 0.500   | -0.824 |       |
| RCT  | 2006 | 337 | 21 | 4       | 11.209   | F         | 0.500   | -0.862 |       |
| R07C | 2006 | 337 | 21 | 4       | 27.202   | F         | 0.500   | 0.817  |       |
| PHL  | 2006 | 337 | 21 | 4       | 17.566   | F         | 0.500   | -0.794 |       |
| HEC  | 2006 | 337 | 21 | 3       | 28.523   | F         | 0.500   | -0.425 |       |
| TOV  | 2006 | 337 | 21 | 3       | 49.206   | F         | 0.500   | -0.257 |       |
| DJJ  | 2006 | 337 | 21 | 3       | 44.918   | F         | 0.500   | -0.208 |       |
| L07A | 2006 | 337 | 21 | 5       | 4.936    | F         | 0.500   | -1.473 |       |
| K08A | 2006 | 337 | 21 | 5       | 4.202    | F         | 0.500   | -2.161 |       |
| K09A | 2006 | 337 | 21 | 4       | 58.713   | F         | 0.500   | -0.896 |       |
| GASB | 2006 | 337 | 21 | 5       | 17.215   | F         | 0.500   | 1.480  |       |
| M06C | 2006 | 337 | 21 | 5       | 7.979    | F         | 0.500   | -0.506 |       |
| SN34 | 2006 | 337 | 21 | 4       | 19.531   | F         | 0.500   | -0.759 |       |
| MPM  | 2006 | 337 | 21 | 3       | 52.008   | F         | 0.500   | -0.321 |       |
| DGR  | 2006 | 337 | 21 | 3       | 25.958   | F         | 0.500   | 0.310  |       |
| SND8 | 2006 | 337 | 21 | 4       | 52.700   | F         | 0.500   | 0.789  |       |
| BBR  | 2006 | 337 | 21 | 3       | 30.302   | F         | 0.500   | 0.054  |       |
| SN14 | 2006 | 337 | 21 | 4       | 15.538   | F         | 0.500   | 0.140  |       |
| SND5 | 2006 | 337 | 21 | 4       | 54.133   | F         | 0.500   | -0.221 |       |
| R08A | 2006 | 337 | 21 | 4       | 20.973   | F         | 0.500   | 1.350  |       |

|      |      |     |    |   |        |   |       |        |
|------|------|-----|----|---|--------|---|-------|--------|
| WCN  | 2006 | 337 | 21 | 4 | 45.140 | F | 0.500 | 0.748  |
| LRL  | 2006 | 337 | 21 | 3 | 48.211 | F | 0.500 | -0.759 |
| SNE4 | 2006 | 337 | 21 | 4 | 57.851 | F | 0.500 | -0.743 |
| O10A | 2006 | 337 | 21 | 4 | 24.923 | F | 0.500 | 0.533  |
| O06A | 2006 | 337 | 21 | 4 | 53.006 | F | 0.500 | 0.027  |
| SUTB | 2006 | 337 | 21 | 5 | 2.883  | F | 0.500 | 0.092  |
| SNA8 | 2006 | 337 | 21 | 4 | 41.726 | F | 0.500 | 0.646  |
| SNB9 | 2006 | 337 | 21 | 4 | 44.222 | F | 0.500 | 0.778  |
| SN97 | 2006 | 337 | 21 | 4 | 41.121 | F | 0.500 | 0.689  |
| P01C | 2006 | 337 | 21 | 5 | 22.204 | F | 0.500 | 2.040  |
| SNF8 | 2006 | 337 | 21 | 4 | 59.703 | F | 0.500 | 0.417  |
| BEK  | 2006 | 337 | 21 | 4 | 55.601 | F | 0.500 | 0.429  |
| DEC  | 2006 | 337 | 21 | 3 | 44.994 | F | 0.500 | -0.064 |
| M05C | 2006 | 337 | 21 | 5 | 14.866 | F | 0.500 | -1.108 |
| CMB  | 2006 | 337 | 21 | 4 | 38.526 | F | 0.500 | -0.366 |
| O09A | 2006 | 337 | 21 | 4 | 29.416 | F | 0.500 | 0.224  |
| SN95 | 2006 | 337 | 21 | 4 | 40.401 | F | 0.500 | -0.066 |
| SNC5 | 2006 | 337 | 21 | 4 | 51.243 | F | 0.500 | -0.065 |
| PKD  | 2006 | 337 | 21 | 4 | 22.861 | F | 0.500 | 0.198  |
| BFS  | 2006 | 337 | 21 | 3 | 37.706 | F | 0.500 | -0.160 |
| SNE6 | 2006 | 337 | 21 | 4 | 56.553 | F | 0.500 | 0.327  |
| O05C | 2006 | 337 | 21 | 5 | 1.889  | F | 0.500 | 0.775  |
| SNF6 | 2006 | 337 | 21 | 5 | 0.754  | F | 0.500 | 0.315  |
| CHF  | 2006 | 337 | 21 | 3 | 42.061 | F | 0.500 | -0.544 |
| TIN  | 2006 | 337 | 21 | 4 | 9.657  | F | 0.500 | 0.996  |
| ORV  | 2006 | 337 | 21 | 5 | 3.669  | F | 0.500 | 0.891  |
| Q08A | 2006 | 337 | 21 | 4 | 23.667 | F | 0.500 | 0.798  |
| SN64 | 2006 | 337 | 21 | 4 | 30.176 | F | 0.500 | -0.266 |
| SN63 | 2006 | 337 | 21 | 4 | 29.681 | F | 0.500 | -1.007 |
| SN75 | 2006 | 337 | 21 | 4 | 33.631 | F | 0.500 | 0.242  |
| SNG5 | 2006 | 337 | 21 | 5 | 5.221  | F | 0.500 | 0.540  |
| SNC6 | 2006 | 337 | 21 | 4 | 49.128 | F | 0.500 | -0.123 |
| SND7 | 2006 | 337 | 21 | 4 | 55.619 | F | 0.500 | 0.503  |
| SN84 | 2006 | 337 | 21 | 4 | 37.638 | F | 0.500 | -0.194 |
| SN96 | 2006 | 337 | 21 | 4 | 40.222 | F | 0.500 | 0.468  |
| SNB3 | 2006 | 337 | 21 | 4 | 49.345 | F | 0.500 | 0.079  |
| HELL | 2006 | 337 | 21 | 4 | 13.306 | F | 0.500 | 0.013  |
| N06A | 2006 | 337 | 21 | 4 | 58.593 | F | 0.500 | 0.234  |
| SNA3 | 2006 | 337 | 21 | 4 | 45.208 | F | 0.500 | 0.165  |
| SNA4 | 2006 | 337 | 21 | 4 | 44.307 | F | 0.500 | -0.181 |
| SN74 | 2006 | 337 | 21 | 4 | 33.757 | F | 0.500 | -0.350 |
| SN85 | 2006 | 337 | 21 | 4 | 37.470 | F | 0.500 | 0.303  |
| SN93 | 2006 | 337 | 21 | 4 | 41.866 | F | 0.500 | -0.105 |
| N09A | 2006 | 337 | 21 | 4 | 39.050 | F | 0.500 | -0.014 |
| R05C | 2006 | 337 | 21 | 4 | 42.347 | F | 0.500 | 0.144  |
| R04C | 2006 | 337 | 21 | 4 | 46.403 | F | 0.500 | 0.304  |
| R06C | 2006 | 337 | 21 | 4 | 35.891 | F | 0.500 | 1.573  |

|      |      |     |    |         |          |           |         |        |       |
|------|------|-----|----|---------|----------|-----------|---------|--------|-------|
| 2006 | 227  | 5   | 43 | 24.9599 | -9.27300 | 150.48100 | 10.0000 | 42     | 3.970 |
| N06A | 2006 | 227 | 6  | 7       | 27.039   | F         | 0.500   | -0.612 |       |
| R05C | 2006 | 227 | 6  | 7       | 25.605   | F         | 0.500   | 0.085  |       |
| SNE5 | 2006 | 227 | 6  | 7       | 20.715   | F         | 0.500   | -0.568 |       |
| I09A | 2006 | 227 | 6  | 7       | 37.065   | F         | 0.500   | -0.275 |       |
| K09A | 2006 | 227 | 6  | 7       | 36.939   | F         | 0.500   | 0.088  |       |
| SN93 | 2006 | 227 | 6  | 7       | 22.053   | F         | 0.500   | -0.339 |       |
| SN34 | 2006 | 227 | 6  | 7       | 29.162   | F         | 0.500   | 0.028  |       |
| Q09A | 2006 | 227 | 6  | 7       | 38.713   | F         | 0.500   | 1.521  |       |
| HEC  | 2006 | 227 | 6  | 7       | 39.483   | F         | 0.500   | 0.942  |       |
| O09A | 2006 | 227 | 6  | 7       | 38.562   | F         | 0.500   | 1.014  |       |
| ORV  | 2006 | 227 | 6  | 7       | 18.650   | F         | 0.500   | -1.219 |       |
| SNC5 | 2006 | 227 | 6  | 7       | 21.938   | F         | 0.500   | -0.648 |       |
| SN95 | 2006 | 227 | 6  | 7       | 23.607   | F         | 0.500   | -0.826 |       |
| N07B | 2006 | 227 | 6  | 7       | 30.777   | F         | 0.500   | -0.210 |       |

|      |      |     |   |   |        |   |       |        |
|------|------|-----|---|---|--------|---|-------|--------|
| N10A | 2006 | 227 | 6 | 7 | 41.106 | F | 0.500 | 0.561  |
| O08A | 2006 | 227 | 6 | 7 | 34.651 | F | 0.500 | 0.510  |
| SNA3 | 2006 | 227 | 6 | 7 | 21.888 | F | 0.500 | -0.217 |
| R09A | 2006 | 227 | 6 | 7 | 39.392 | F | 0.500 | 1.873  |
| SNE4 | 2006 | 227 | 6 | 7 | 19.635 | F | 0.500 | -0.329 |
| SNB9 | 2006 | 227 | 6 | 7 | 28.639 | F | 0.500 | 0.835  |
| P05C | 2006 | 227 | 6 | 7 | 23.094 | F | 0.500 | -0.499 |
| J07A | 2006 | 227 | 6 | 7 | 30.392 | F | 0.500 | -0.742 |
| S06C | 2006 | 227 | 6 | 7 | 25.019 | F | 0.500 | -0.894 |
| TPH  | 2006 | 227 | 6 | 7 | 38.301 | F | 0.500 | 1.479  |
| Q08A | 2006 | 227 | 6 | 7 | 35.232 | F | 0.500 | 0.903  |
| S09A | 2006 | 227 | 6 | 7 | 37.955 | F | 0.500 | 1.347  |
| N08A | 2006 | 227 | 6 | 7 | 34.609 | F | 0.500 | 0.313  |
| YBH  | 2006 | 227 | 6 | 7 | 15.649 | F | 0.500 | -0.949 |
| SNB7 | 2006 | 227 | 6 | 7 | 25.425 | F | 0.500 | -0.047 |
| Q07A | 2006 | 227 | 6 | 7 | 31.346 | F | 0.500 | 0.793  |
| M08A | 2006 | 227 | 6 | 7 | 33.779 | F | 0.500 | -0.001 |
| SUTB | 2006 | 227 | 6 | 7 | 17.599 | F | 0.500 | -0.802 |
| BFS  | 2006 | 227 | 6 | 7 | 31.911 | F | 0.500 | -0.833 |
| VCS  | 2006 | 227 | 6 | 7 | 29.444 | F | 0.500 | -1.363 |
| LRL  | 2006 | 227 | 6 | 7 | 34.152 | F | 0.500 | 0.784  |
| O10A | 2006 | 227 | 6 | 7 | 41.393 | F | 0.500 | 0.996  |
| CMB  | 2006 | 227 | 6 | 7 | 22.630 | F | 0.500 | -0.639 |
| SND8 | 2006 | 227 | 6 | 7 | 25.463 | F | 0.500 | 0.203  |
| SN65 | 2006 | 227 | 6 | 7 | 27.756 | F | 0.500 | -0.022 |
| L09A | 2006 | 227 | 6 | 7 | 36.865 | F | 0.500 | 0.153  |
| O06A | 2006 | 227 | 6 | 7 | 26.725 | F | 0.500 | -0.562 |
| SN64 | 2006 | 227 | 6 | 7 | 26.649 | F | 0.500 | -0.216 |
| SN85 | 2006 | 227 | 6 | 7 | 25.015 | F | 0.500 | -0.676 |
| SNC3 | 2006 | 227 | 6 | 7 | 19.645 | F | 0.500 | -0.508 |
| SN14 | 2006 | 227 | 6 | 7 | 29.701 | F | 0.500 | -0.457 |
| K08A | 2006 | 227 | 6 | 7 | 33.986 | F | 0.500 | 0.027  |
| SN63 | 2006 | 227 | 6 | 7 | 25.233 | F | 0.500 | -0.714 |
| R08A | 2006 | 227 | 6 | 7 | 34.783 | F | 0.500 | 1.657  |
| SN97 | 2006 | 227 | 6 | 7 | 26.640 | F | 0.500 | 0.009  |
| GSC  | 2006 | 227 | 6 | 7 | 38.571 | F | 0.500 | 1.596  |
| BEK  | 2006 | 227 | 6 | 7 | 24.117 | F | 0.500 | -1.026 |
| SNC4 | 2006 | 227 | 6 | 7 | 20.785 | F | 0.500 | -0.753 |
| SNA8 | 2006 | 227 | 6 | 7 | 28.119 | F | 0.500 | 0.497  |
| MPM  | 2006 | 227 | 6 | 7 | 35.396 | F | 0.500 | 0.795  |
| J08A | 2006 | 227 | 6 | 7 | 33.577 | F | 0.500 | -0.645 |
| SN74 | 2006 | 227 | 6 | 7 | 24.745 | F | 0.500 | -0.717 |
| DGR  | 2006 | 227 | 6 | 7 | 36.042 | F | 0.500 | 1.003  |
| P09A | 2006 | 227 | 6 | 7 | 38.597 | F | 0.500 | 0.906  |
| S08C | 2006 | 227 | 6 | 7 | 33.518 | F | 0.500 | 0.594  |
| SNA4 | 2006 | 227 | 6 | 7 | 22.654 | F | 0.500 | -0.410 |
| WCN  | 2006 | 227 | 6 | 7 | 27.774 | F | 0.500 | 0.763  |
| U10A | 2006 | 227 | 6 | 7 | 42.415 | F | 0.500 | 3.155  |
| SNF6 | 2006 | 227 | 6 | 7 | 20.488 | F | 0.500 | -1.379 |
| SN43 | 2006 | 227 | 6 | 7 | 26.417 | F | 0.500 | -0.797 |
| J09A | 2006 | 227 | 6 | 7 | 36.605 | F | 0.500 | -0.512 |
| T06C | 2006 | 227 | 6 | 7 | 24.593 | F | 0.500 | -1.010 |
| HELL | 2006 | 227 | 6 | 7 | 27.112 | F | 0.500 | -1.346 |
| SND5 | 2006 | 227 | 6 | 7 | 21.227 | F | 0.500 | -0.673 |
| PHL  | 2006 | 227 | 6 | 7 | 19.524 | F | 0.500 | -1.197 |
| K07A | 2006 | 227 | 6 | 7 | 31.071 | F | 0.500 | 0.119  |
| L08A | 2006 | 227 | 6 | 7 | 34.326 | F | 0.500 | 0.084  |

|      |      |     |    |         |          |           |         |        |
|------|------|-----|----|---------|----------|-----------|---------|--------|
| 2006 | 259  | 9   | 45 | 29.4311 | -3.08000 | 129.44099 | 17.0000 |        |
| SN85 | 2006 | 259 | 10 | 10      | 28.583   | F         | 0.500   | 0.229  |
| O06A | 2006 | 259 | 10 | 10      | 26.462   | F         | 0.500   | -0.596 |
| SN96 | 2006 | 259 | 10 | 10      | 28.244   | F         | 0.500   | 0.135  |
| J08A | 2006 | 259 | 10 | 10      | 28.173   | F         | 0.500   | -0.160 |

|      |      |     |    |    |        |   |       |        |
|------|------|-----|----|----|--------|---|-------|--------|
| L07A | 2006 | 259 | 10 | 10 | 27.132 | F | 0.500 | -0.078 |
| SNA8 | 2006 | 259 | 10 | 10 | 29.533 | F | 0.500 | 0.674  |
| N07B | 2006 | 259 | 10 | 10 | 28.808 | F | 0.500 | -0.444 |
| SNC8 | 2006 | 259 | 10 | 10 | 26.846 | F | 0.500 | -0.582 |
| SN97 | 2006 | 259 | 10 | 10 | 28.703 | F | 0.500 | 0.345  |
| SND4 | 2006 | 259 | 10 | 10 | 22.568 | F | 0.500 | -0.840 |
| SNF8 | 2006 | 259 | 10 | 10 | 23.200 | F | 0.500 | -1.611 |
| SNB9 | 2006 | 259 | 10 | 10 | 29.600 | F | 0.500 | 1.043  |
| L08A | 2006 | 259 | 10 | 10 | 29.802 | F | 0.500 | -0.084 |
| SN43 | 2006 | 259 | 10 | 10 | 31.174 | F | 0.500 | 0.428  |
| SNB3 | 2006 | 259 | 10 | 10 | 23.876 | F | 0.500 | -0.453 |
| WCN  | 2006 | 259 | 10 | 10 | 28.947 | F | 0.500 | 0.892  |
| S04C | 2006 | 259 | 10 | 10 | 23.819 | F | 0.500 | -0.211 |
| K07A | 2006 | 259 | 10 | 10 | 26.450 | F | 0.500 | -0.188 |
| SND7 | 2006 | 259 | 10 | 10 | 24.274 | F | 0.500 | -0.825 |
| SN93 | 2006 | 259 | 10 | 10 | 25.868 | F | 0.500 | 0.104  |
| CMB  | 2006 | 259 | 10 | 10 | 26.486 | F | 0.500 | -0.148 |
| SNC7 | 2006 | 259 | 10 | 10 | 25.988 | F | 0.500 | -0.168 |
| SNA7 | 2006 | 259 | 10 | 10 | 28.501 | F | 0.500 | 0.504  |
| N06A | 2006 | 259 | 10 | 10 | 25.943 | F | 0.500 | -0.649 |
| SN34 | 2006 | 259 | 10 | 10 | 33.483 | F | 0.500 | 1.182  |
| R04C | 2006 | 259 | 10 | 10 | 23.989 | F | 0.500 | -0.517 |
| SN74 | 2006 | 259 | 10 | 10 | 28.494 | F | 0.500 | -0.095 |
| SN64 | 2006 | 259 | 10 | 10 | 30.281 | F | 0.500 | 0.380  |
| SNE4 | 2006 | 259 | 10 | 10 | 21.827 | F | 0.500 | -0.510 |
| SN63 | 2006 | 259 | 10 | 10 | 29.364 | F | 0.500 | 0.081  |
| LAVA | 2006 | 259 | 10 | 10 | 24.567 | F | 0.500 | -0.470 |
| SNC6 | 2006 | 259 | 10 | 10 | 25.612 | F | 0.500 | -0.464 |
| R05C | 2006 | 259 | 10 | 10 | 27.954 | F | 0.500 | 0.305  |
| SNB6 | 2006 | 259 | 10 | 10 | 26.685 | F | 0.500 | -0.263 |
| SNC5 | 2006 | 259 | 10 | 10 | 24.209 | F | 0.500 | -0.576 |
| BEK  | 2006 | 259 | 10 | 10 | 24.636 | F | 0.500 | -1.228 |
| SNB5 | 2006 | 259 | 10 | 10 | 25.250 | F | 0.500 | -0.450 |
| S05C | 2006 | 259 | 10 | 10 | 27.009 | F | 0.500 | -0.364 |
| SNA4 | 2006 | 259 | 10 | 10 | 25.682 | F | 0.500 | -0.223 |
| SNA3 | 2006 | 259 | 10 | 10 | 25.354 | F | 0.500 | 0.093  |
| SND8 | 2006 | 259 | 10 | 10 | 25.702 | F | 0.500 | -0.501 |
| P05C | 2006 | 259 | 10 | 10 | 24.875 | F | 0.500 | -0.425 |
| SND5 | 2006 | 259 | 10 | 10 | 23.291 | F | 0.500 | -0.756 |
| T06C | 2006 | 259 | 10 | 10 | 29.683 | F | 0.500 | -0.128 |
| FUR  | 2006 | 259 | 10 | 10 | 41.680 | F | 0.500 | 2.460  |
| MWC  | 2006 | 259 | 10 | 10 | 38.259 | F | 0.500 | 0.465  |
| M08A | 2006 | 259 | 10 | 10 | 29.987 | F | 0.500 | -0.610 |
| L05A | 2006 | 259 | 10 | 10 | 21.791 | F | 0.500 | -0.679 |
| BNLO | 2006 | 259 | 10 | 10 | 20.119 | F | 0.500 | -1.104 |
| Q04C | 2006 | 259 | 10 | 10 | 22.476 | F | 0.500 | -0.051 |
| VCS  | 2006 | 259 | 10 | 10 | 38.064 | F | 0.500 | 0.993  |
| T05C | 2006 | 259 | 10 | 10 | 27.721 | F | 0.500 | 1.132  |
| P09A | 2006 | 259 | 10 | 10 | 36.218 | F | 0.500 | 0.001  |
| EDW2 | 2006 | 259 | 10 | 10 | 39.075 | F | 0.500 | 2.039  |
| O09A | 2006 | 259 | 10 | 10 | 35.781 | F | 0.500 | 0.605  |
| P06A | 2006 | 259 | 10 | 10 | 27.131 | F | 0.500 | -0.031 |
| DGR  | 2006 | 259 | 10 | 10 | 43.443 | F | 0.500 | 2.189  |
| N02C | 2006 | 259 | 10 | 10 | 14.734 | F | 0.500 | -0.032 |
| SN87 | 2006 | 259 | 10 | 10 | 29.893 | F | 0.500 | 0.572  |
| LRL  | 2006 | 259 | 10 | 10 | 39.886 | F | 0.500 | 2.058  |
| WENL | 2006 | 259 | 10 | 10 | 22.012 | F | 0.500 | -0.260 |
| ISA  | 2006 | 259 | 10 | 10 | 35.288 | F | 0.500 | 0.402  |
| K05A | 2006 | 259 | 10 | 10 | 20.470 | F | 0.500 | -1.053 |
| K06A | 2006 | 259 | 10 | 10 | 22.469 | F | 0.500 | -0.917 |
| SN75 | 2006 | 259 | 10 | 10 | 29.908 | F | 0.500 | 0.244  |
| J05A | 2006 | 259 | 10 | 10 | 18.855 | F | 0.500 | -1.025 |
| SN55 | 2006 | 259 | 10 | 10 | 32.204 | F | 0.500 | 1.265  |

|      |      |     |    |    |        |   |       |        |
|------|------|-----|----|----|--------|---|-------|--------|
| CWC  | 2006 | 259 | 10 | 10 | 36.961 | F | 0.500 | 0.930  |
| MNRC | 2006 | 259 | 10 | 10 | 20.045 | F | 0.500 | 0.683  |
| MPM  | 2006 | 259 | 10 | 10 | 40.150 | F | 0.500 | 1.982  |
| BDM  | 2006 | 259 | 10 | 10 | 21.807 | F | 0.500 | 0.211  |
| Q08A | 2006 | 259 | 10 | 10 | 35.453 | F | 0.500 | 0.989  |
| J03A | 2006 | 259 | 10 | 10 | 12.707 | F | 0.500 | -1.760 |
| GASB | 2006 | 259 | 10 | 10 | 18.617 | F | 0.500 | 0.708  |
| RCT  | 2006 | 259 | 10 | 10 | 30.822 | F | 0.500 | -0.800 |
| YBH  | 2006 | 259 | 10 | 10 | 14.906 | F | 0.500 | -1.306 |
| M06C | 2006 | 259 | 10 | 10 | 23.296 | F | 0.500 | -0.847 |
| R06C | 2006 | 259 | 10 | 10 | 30.896 | F | 0.500 | 1.175  |
| M05C | 2006 | 259 | 10 | 10 | 20.962 | F | 0.500 | -1.001 |
| ARV  | 2006 | 259 | 10 | 10 | 35.847 | F | 0.500 | 1.882  |
| WDC  | 2006 | 259 | 10 | 10 | 16.324 | F | 0.500 | -1.115 |
| PKD  | 2006 | 259 | 10 | 10 | 28.062 | F | 0.500 | 0.389  |
| R08A | 2006 | 259 | 10 | 10 | 36.042 | F | 0.500 | 2.004  |
| S09A | 2006 | 259 | 10 | 10 | 39.140 | F | 0.500 | 1.526  |
| S08C | 2006 | 259 | 10 | 10 | 37.054 | F | 0.500 | 1.965  |
| HEC  | 2006 | 259 | 10 | 10 | 45.652 | F | 0.500 | 2.967  |
| PACP | 2006 | 259 | 10 | 10 | 24.402 | F | 0.500 | -0.137 |
| J07A | 2006 | 259 | 10 | 10 | 25.353 | F | 0.500 | -0.484 |
| HAST | 2006 | 259 | 10 | 10 | 23.622 | F | 0.500 | -0.268 |
| SNE6 | 2006 | 259 | 10 | 10 | 23.202 | F | 0.500 | -1.262 |
| SN14 | 2006 | 259 | 10 | 10 | 34.522 | F | 0.500 | 1.153  |
| SNB7 | 2006 | 259 | 10 | 10 | 27.064 | F | 0.500 | -0.088 |
| J09A | 2006 | 259 | 10 | 10 | 30.301 | F | 0.500 | -0.399 |
| SNG7 | 2006 | 259 | 10 | 10 | 21.130 | F | 0.500 | -1.872 |
| I06A | 2006 | 259 | 10 | 10 | 22.153 | F | 0.500 | -0.331 |
| K09A | 2006 | 259 | 10 | 10 | 31.439 | F | 0.500 | 0.063  |
| I09A | 2006 | 259 | 10 | 10 | 29.701 | F | 0.500 | -0.225 |
| K08A | 2006 | 259 | 10 | 10 | 28.688 | F | 0.500 | -0.222 |
| O05C | 2006 | 259 | 10 | 10 | 21.874 | F | 0.500 | -1.446 |
| SN95 | 2006 | 259 | 10 | 10 | 27.160 | F | 0.500 | -0.040 |
| WVOR | 2006 | 259 | 10 | 10 | 28.563 | F | 0.500 | -0.119 |
| I08A | 2006 | 259 | 10 | 10 | 27.391 | F | 0.500 | -0.271 |
| HELL | 2006 | 259 | 10 | 10 | 32.377 | F | 0.500 | -0.121 |
| ORV  | 2006 | 259 | 10 | 10 | 20.473 | F | 0.500 | -1.545 |
| O08A | 2006 | 259 | 10 | 10 | 32.856 | F | 0.500 | 0.462  |
| SNE7 | 2006 | 259 | 10 | 10 | 23.129 | F | 0.500 | -1.300 |
| R07C | 2006 | 259 | 10 | 10 | 33.419 | F | 0.500 | 1.712  |
| M07A | 2006 | 259 | 10 | 10 | 27.622 | F | 0.500 | -0.482 |
| N08A | 2006 | 259 | 10 | 10 | 31.821 | F | 0.500 | -0.090 |
| SNF6 | 2006 | 259 | 10 | 10 | 21.382 | F | 0.500 | -1.946 |
| S06C | 2006 | 259 | 10 | 10 | 29.050 | F | 0.500 | 0.085  |
| SN84 | 2006 | 259 | 10 | 10 | 27.240 | F | 0.500 | -0.511 |
| J06A | 2006 | 259 | 10 | 10 | 22.267 | F | 0.500 | -1.161 |
| SUTB | 2006 | 259 | 10 | 10 | 20.312 | F | 0.500 | -0.788 |

|      |      |     |    |         |          |           |         |        |       |
|------|------|-----|----|---------|----------|-----------|---------|--------|-------|
| 2006 | 360  | 12  | 26 | 23.2023 | 21.79900 | 120.54700 | 10.0000 | 44     | 2.062 |
| MUR  | 2006 | 360 | 12 | 50      | 59.662   | F         | 0.500   | 1.621  |       |
| BAK  | 2006 | 360 | 12 | 50      | 47.133   | F         | 0.500   | 0.372  |       |
| P01C | 2006 | 360 | 12 | 50      | 20.252   | F         | 0.500   | -0.027 |       |
| I06A | 2006 | 360 | 12 | 50      | 17.418   | F         | 0.500   | 0.139  |       |
| K06A | 2006 | 360 | 12 | 50      | 20.319   | F         | 0.500   | -0.493 |       |
| ELFS | 2006 | 360 | 12 | 50      | 25.507   | F         | 0.500   | -0.455 |       |
| P10A | 2006 | 360 | 12 | 50      | 42.873   | F         | 0.500   | -0.116 |       |
| WDC  | 2006 | 360 | 12 | 50      | 18.179   | F         | 0.500   | -1.462 |       |
| TOV  | 2006 | 360 | 12 | 50      | 51.139   | F         | 0.500   | -0.192 |       |
| SNG5 | 2006 | 360 | 12 | 50      | 23.393   | F         | 0.500   | -2.409 |       |
| SDD  | 2006 | 360 | 12 | 50      | 58.457   | F         | 0.500   | 1.911  |       |
| PHL  | 2006 | 360 | 12 | 50      | 41.529   | F         | 0.500   | -0.238 |       |
| M09A | 2006 | 360 | 12 | 50      | 34.243   | F         | 0.500   | 0.090  |       |
| HOPS | 2006 | 360 | 12 | 50      | 22.586   | F         | 0.500   | -0.316 |       |

|      |      |     |    |    |        |   |       |        |
|------|------|-----|----|----|--------|---|-------|--------|
| GASB | 2006 | 360 | 12 | 50 | 22.230 | F | 0.500 | -0.071 |
| ADO  | 2006 | 360 | 12 | 50 | 55.091 | F | 0.500 | 0.175  |
| TIN  | 2006 | 360 | 12 | 50 | 45.194 | F | 0.500 | 0.044  |
| I08A | 2006 | 360 | 12 | 50 | 22.795 | F | 0.500 | 0.115  |
| BDM  | 2006 | 360 | 12 | 50 | 29.722 | F | 0.500 | -0.214 |
| SN87 | 2006 | 360 | 12 | 50 | 35.971 | F | 0.500 | 0.036  |
| FMP  | 2006 | 360 | 12 | 50 | 54.814 | F | 0.500 | 0.789  |
| SN75 | 2006 | 360 | 12 | 50 | 37.099 | F | 0.500 | -0.407 |
| S09A | 2006 | 360 | 12 | 50 | 47.077 | F | 0.500 | 0.849  |
| SVD  | 2006 | 360 | 12 | 50 | 57.479 | F | 0.500 | 0.316  |
| JRSC | 2006 | 360 | 12 | 50 | 28.949 | F | 0.500 | -1.361 |
| Q04C | 2006 | 360 | 12 | 50 | 28.386 | F | 0.500 | -0.447 |
| SNCC | 2006 | 360 | 12 | 50 | 52.021 | F | 0.500 | 0.308  |
| SLA  | 2006 | 360 | 12 | 50 | 51.981 | F | 0.500 | 0.432  |
| SBC  | 2006 | 360 | 12 | 50 | 48.124 | F | 0.500 | 0.513  |
| MNRC | 2006 | 360 | 12 | 50 | 25.708 | F | 0.500 | 0.107  |
| CVS  | 2006 | 360 | 12 | 50 | 25.803 | F | 0.500 | -1.080 |
| TPH  | 2006 | 360 | 12 | 50 | 45.877 | F | 0.500 | 0.585  |
| SNF6 | 2006 | 360 | 12 | 50 | 25.368 | F | 0.500 | -2.295 |
| SMM  | 2006 | 360 | 12 | 50 | 44.943 | F | 0.500 | 0.817  |
| WENL | 2006 | 360 | 12 | 50 | 30.768 | F | 0.500 | -0.521 |
| P09A | 2006 | 360 | 12 | 50 | 40.682 | F | 0.500 | -0.309 |
| SNF8 | 2006 | 360 | 12 | 50 | 26.618 | F | 0.500 | -1.789 |
| GRA  | 2006 | 360 | 12 | 50 | 48.008 | F | 0.500 | 0.412  |
| PKD  | 2006 | 360 | 12 | 50 | 40.196 | F | 0.500 | -0.262 |
| FUR  | 2006 | 360 | 12 | 50 | 51.504 | F | 0.500 | 1.046  |
| SNA7 | 2006 | 360 | 12 | 50 | 33.961 | F | 0.500 | 0.090  |
| U04C | 2006 | 360 | 12 | 50 | 38.475 | F | 0.500 | 0.134  |
| SCZ2 | 2006 | 360 | 12 | 50 | 48.851 | F | 0.500 | -0.019 |
| WVOR | 2006 | 360 | 12 | 50 | 27.059 | F | 0.500 | 0.162  |
| SUTB | 2006 | 360 | 12 | 50 | 24.936 | F | 0.500 | -1.500 |
| R06C | 2006 | 360 | 12 | 50 | 36.972 | F | 0.500 | 0.196  |
| M10A | 2006 | 360 | 12 | 50 | 37.134 | F | 0.500 | 0.796  |
| SN97 | 2006 | 360 | 12 | 50 | 34.752 | F | 0.500 | 0.034  |
| K07A | 2006 | 360 | 12 | 50 | 24.221 | F | 0.500 | -0.152 |
| SN14 | 2006 | 360 | 12 | 50 | 43.940 | F | 0.500 | 0.553  |
| S08C | 2006 | 360 | 12 | 50 | 45.710 | F | 0.500 | 1.487  |
| LGU  | 2006 | 360 | 12 | 50 | 50.268 | F | 0.500 | -0.548 |
| BBR  | 2006 | 360 | 12 | 50 | 57.844 | F | 0.500 | 0.078  |
| SNB3 | 2006 | 360 | 12 | 50 | 30.461 | F | 0.500 | -0.727 |
| S06C | 2006 | 360 | 12 | 50 | 36.682 | F | 0.500 | -0.642 |
| SNE6 | 2006 | 360 | 12 | 50 | 27.451 | F | 0.500 | -1.849 |
| R05C | 2006 | 360 | 12 | 50 | 34.085 | F | 0.500 | -0.169 |
| DEC  | 2006 | 360 | 12 | 50 | 52.598 | F | 0.500 | -0.045 |
| RPV  | 2006 | 360 | 12 | 50 | 54.368 | F | 0.500 | 0.517  |
| SN85 | 2006 | 360 | 12 | 50 | 35.430 | F | 0.500 | -0.499 |
| SN64 | 2006 | 360 | 12 | 50 | 38.345 | F | 0.500 | -0.067 |
| CIA  | 2006 | 360 | 12 | 50 | 55.396 | F | 0.500 | 0.457  |
| SN34 | 2006 | 360 | 12 | 50 | 42.260 | F | 0.500 | 0.449  |
| SAO  | 2006 | 360 | 12 | 50 | 34.358 | F | 0.500 | -0.554 |
| OSI  | 2006 | 360 | 12 | 50 | 51.199 | F | 0.500 | 0.732  |
| SN84 | 2006 | 360 | 12 | 50 | 34.583 | F | 0.500 | -1.009 |
| BFS  | 2006 | 360 | 12 | 50 | 55.517 | F | 0.500 | 0.505  |
| R04C | 2006 | 360 | 12 | 50 | 31.201 | F | 0.500 | -0.767 |
| BEK  | 2006 | 360 | 12 | 50 | 28.487 | F | 0.500 | -1.419 |
| SHO  | 2006 | 360 | 12 | 50 | 56.305 | F | 0.500 | 1.977  |
| CMB  | 2006 | 360 | 12 | 50 | 33.999 | F | 0.500 | -0.738 |
| PACP | 2006 | 360 | 12 | 50 | 34.190 | F | 0.500 | -0.668 |
| MPM  | 2006 | 360 | 12 | 50 | 51.090 | F | 0.500 | 0.586  |
| HAST | 2006 | 360 | 12 | 50 | 34.684 | F | 0.500 | -1.056 |
| SN96 | 2006 | 360 | 12 | 50 | 34.876 | F | 0.500 | -0.338 |
| JCS  | 2006 | 360 | 12 | 51 | 4.562  | F | 0.500 | 2.867  |
| SN93 | 2006 | 360 | 12 | 50 | 33.072 | F | 0.500 | -0.406 |

|      |      |     |    |    |        |   |       |        |
|------|------|-----|----|----|--------|---|-------|--------|
| LRL  | 2006 | 360 | 12 | 50 | 52.066 | F | 0.500 | 0.768  |
| SNA3 | 2006 | 360 | 12 | 50 | 31.940 | F | 0.500 | -0.660 |
| SNC5 | 2006 | 360 | 12 | 50 | 29.714 | F | 0.500 | -0.836 |
| MPP  | 2006 | 360 | 12 | 50 | 47.446 | F | 0.500 | 1.316  |
| SNA8 | 2006 | 360 | 12 | 50 | 34.701 | F | 0.500 | 0.034  |
| WCN  | 2006 | 360 | 12 | 50 | 33.692 | F | 0.500 | 0.316  |
| GSC  | 2006 | 360 | 12 | 50 | 56.353 | F | 0.500 | 1.767  |
| R09A | 2006 | 360 | 12 | 50 | 45.949 | F | 0.500 | 0.809  |
| ARV  | 2006 | 360 | 12 | 50 | 49.231 | F | 0.500 | 0.983  |
| LAVA | 2006 | 360 | 12 | 50 | 30.676 | F | 0.500 | -0.907 |
| SN43 | 2006 | 360 | 12 | 50 | 39.919 | F | 0.500 | -0.330 |
| DJJ  | 2006 | 360 | 12 | 50 | 52.524 | F | 0.500 | 0.034  |
| MWC  | 2006 | 360 | 12 | 50 | 53.975 | F | 0.500 | 0.002  |
| SND8 | 2006 | 360 | 12 | 50 | 29.888 | F | 0.500 | -0.857 |
| SNC6 | 2006 | 360 | 12 | 50 | 31.286 | F | 0.500 | -0.583 |
| RRX  | 2006 | 360 | 12 | 50 | 56.489 | F | 0.500 | 1.524  |
| K10A | 2006 | 360 | 12 | 50 | 32.194 | F | 0.500 | 0.843  |
| HEC  | 2006 | 360 | 12 | 50 | 59.194 | F | 0.500 | 1.692  |
| O06A | 2006 | 360 | 12 | 50 | 29.669 | F | 0.500 | -0.724 |
| T06C | 2006 | 360 | 12 | 50 | 39.328 | F | 0.500 | -0.800 |
| S04C | 2006 | 360 | 12 | 50 | 32.548 | F | 0.500 | -0.823 |
| HELL | 2006 | 360 | 12 | 50 | 42.737 | F | 0.500 | -0.702 |
| SN95 | 2006 | 360 | 12 | 50 | 34.055 | F | 0.500 | -0.525 |
| SNB5 | 2006 | 360 | 12 | 50 | 31.737 | F | 0.500 | -0.288 |
| SNB9 | 2006 | 360 | 12 | 50 | 34.089 | F | 0.500 | 0.415  |
| PLM  | 2006 | 360 | 12 | 51 | 2.614  | F | 0.500 | 2.339  |
| VTV  | 2006 | 360 | 12 | 50 | 55.193 | F | 0.500 | 0.257  |
| S05C | 2006 | 360 | 12 | 50 | 35.923 | F | 0.500 | -1.038 |
| DGR  | 2006 | 360 | 12 | 51 | 0.061  | F | 0.500 | 1.576  |
| EDW2 | 2006 | 360 | 12 | 50 | 53.149 | F | 0.500 | 1.390  |
| VES  | 2006 | 360 | 12 | 50 | 43.885 | F | 0.500 | -1.650 |

|      |      |    |    |         |          |           |         |        |
|------|------|----|----|---------|----------|-----------|---------|--------|
| 2007 | 55   | 2  | 36 | 26.5269 | -7.00600 | -80.48500 | 23.0000 |        |
| CMB  | 2007 | 55 | 2  | 54      | 19.804   | F         | 0.500   | -0.316 |
| GASB | 2007 | 55 | 2  | 54      | 53.424   | F         | 0.500   | 1.886  |
| MUR  | 2007 | 55 | 2  | 53      | 15.150   | F         | 0.500   | 0.138  |
| SNB7 | 2007 | 55 | 2  | 54      | 27.494   | F         | 0.500   | 0.058  |
| PLM  | 2007 | 55 | 2  | 53      | 10.454   | F         | 0.500   | 0.236  |
| M09A | 2007 | 55 | 2  | 54      | 27.756   | F         | 0.500   | -1.295 |
| J09A | 2007 | 55 | 2  | 54      | 46.730   | F         | 0.500   | -2.094 |
| JCS  | 2007 | 55 | 2  | 53      | 5.442    | F         | 0.500   | 0.144  |
| O10A | 2007 | 55 | 2  | 54      | 11.584   | F         | 0.500   | -0.513 |
| DEC  | 2007 | 55 | 2  | 53      | 30.949   | F         | 0.500   | 0.602  |
| VTV  | 2007 | 55 | 2  | 53      | 24.663   | F         | 0.500   | -0.306 |
| DGR  | 2007 | 55 | 2  | 53      | 14.588   | F         | 0.500   | 0.624  |
| MWC  | 2007 | 55 | 2  | 53      | 28.844   | F         | 0.500   | 0.852  |
| GRA  | 2007 | 55 | 2  | 53      | 48.490   | F         | 0.500   | 0.987  |
| SN87 | 2007 | 55 | 2  | 54      | 21.232   | F         | 0.500   | 0.865  |
| Q08A | 2007 | 55 | 2  | 54      | 8.785    | F         | 0.500   | -0.079 |
| SNA8 | 2007 | 55 | 2  | 54      | 23.878   | F         | 0.500   | 0.197  |
| O05C | 2007 | 55 | 2  | 54      | 41.126   | F         | 0.500   | 0.528  |
| SN98 | 2007 | 55 | 2  | 54      | 21.320   | F         | 0.500   | 0.664  |
| PASC | 2007 | 55 | 2  | 53      | 29.028   | F         | 0.500   | 0.622  |
| SNB9 | 2007 | 55 | 2  | 54      | 26.380   | F         | 0.500   | 0.394  |
| M07A | 2007 | 55 | 2  | 54      | 39.516   | F         | 0.500   | -1.141 |
| J10A | 2007 | 55 | 2  | 54      | 41.850   | F         | 0.500   | -1.265 |
| TIN  | 2007 | 55 | 2  | 53      | 55.442   | F         | 0.500   | 0.764  |
| K11A | 2007 | 55 | 2  | 54      | 32.145   | F         | 0.500   | -0.201 |
| SNF8 | 2007 | 55 | 2  | 54      | 39.310   | F         | 0.500   | -0.012 |
| CHF  | 2007 | 55 | 2  | 53      | 29.115   | F         | 0.500   | 0.456  |
| MPM  | 2007 | 55 | 2  | 53      | 40.891   | F         | 0.500   | 0.757  |
| SNC5 | 2007 | 55 | 2  | 54      | 31.217   | F         | 0.500   | -0.291 |
| SNE4 | 2007 | 55 | 2  | 54      | 37.206   | F         | 0.500   | -0.283 |

45

2.877



|      |      |    |   |    |        |   |       |        |
|------|------|----|---|----|--------|---|-------|--------|
| BFS  | 2007 | 55 | 2 | 53 | 25.723 | F | 0.500 | 0.859  |
| R07C | 2007 | 55 | 2 | 54 | 11.367 | F | 0.500 | 0.940  |
| SLA  | 2007 | 55 | 2 | 53 | 37.383 | F | 0.500 | 0.664  |
| SN34 | 2007 | 55 | 2 | 54 | 3.492  | F | 0.500 | -0.964 |
| HAST | 2007 | 55 | 2 | 54 | 16.185 | F | 0.500 | 0.851  |
| SNC3 | 2007 | 55 | 2 | 54 | 31.580 | F | 0.500 | -0.307 |
| SND4 | 2007 | 55 | 2 | 54 | 34.182 | F | 0.500 | -0.284 |
| P09A | 2007 | 55 | 2 | 54 | 8.942  | F | 0.500 | -0.731 |
| I09A | 2007 | 55 | 2 | 54 | 52.294 | F | 0.500 | -2.180 |
| BEK  | 2007 | 55 | 2 | 54 | 36.197 | F | 0.500 | 0.394  |
| SN43 | 2007 | 55 | 2 | 54 | 6.246  | F | 0.500 | -1.763 |
| GSC  | 2007 | 55 | 2 | 53 | 28.192 | F | 0.500 | 0.671  |
| SHO  | 2007 | 55 | 2 | 53 | 29.125 | F | 0.500 | 0.489  |
| Q10A | 2007 | 55 | 2 | 53 | 58.508 | F | 0.500 | 1.016  |
| SNG5 | 2007 | 55 | 2 | 54 | 42.997 | F | 0.500 | -0.102 |
| SNG7 | 2007 | 55 | 2 | 54 | 44.007 | F | 0.500 | 0.201  |
| O04C | 2007 | 55 | 2 | 54 | 45.130 | F | 0.500 | 0.120  |
| L10A | 2007 | 55 | 2 | 54 | 28.251 | F | 0.500 | -0.433 |
| SN63 | 2007 | 55 | 2 | 54 | 12.159 | F | 0.500 | -1.025 |
| SN14 | 2007 | 55 | 2 | 53 | 59.784 | F | 0.500 | -0.524 |
| SNC7 | 2007 | 55 | 2 | 54 | 31.522 | F | 0.500 | 0.009  |
| R04C | 2007 | 55 | 2 | 54 | 26.441 | F | 0.500 | 0.447  |
| SN74 | 2007 | 55 | 2 | 54 | 15.538 | F | 0.500 | -0.791 |
| HELL | 2007 | 55 | 2 | 53 | 57.270 | F | 0.500 | -0.306 |
| SND5 | 2007 | 55 | 2 | 54 | 33.582 | F | 0.500 | -0.467 |
| SNF9 | 2007 | 55 | 2 | 54 | 39.376 | F | 0.500 | 0.481  |
| LRL  | 2007 | 55 | 2 | 53 | 36.170 | F | 0.500 | -0.028 |
| SND8 | 2007 | 55 | 2 | 54 | 33.438 | F | 0.500 | 0.430  |
| P05C | 2007 | 55 | 2 | 54 | 32.601 | F | 0.500 | -0.184 |
| SN84 | 2007 | 55 | 2 | 54 | 19.122 | F | 0.500 | -0.377 |
| SN55 | 2007 | 55 | 2 | 54 | 10.974 | F | 0.500 | -0.094 |
| SN95 | 2007 | 55 | 2 | 54 | 21.620 | F | 0.500 | -0.310 |
| SN85 | 2007 | 55 | 2 | 54 | 19.243 | F | 0.500 | -0.015 |
| SNE5 | 2007 | 55 | 2 | 54 | 37.033 | F | 0.500 | -0.444 |
| SNA4 | 2007 | 55 | 2 | 54 | 25.230 | F | 0.500 | -0.075 |
| SN97 | 2007 | 55 | 2 | 54 | 23.061 | F | 0.500 | 0.376  |
| SNB3 | 2007 | 55 | 2 | 54 | 29.167 | F | 0.500 | 0.105  |
| ORV  | 2007 | 55 | 2 | 54 | 41.855 | F | 0.500 | 0.678  |
| SN64 | 2007 | 55 | 2 | 54 | 12.951 | F | 0.500 | -0.310 |
| S09A | 2007 | 55 | 2 | 53 | 53.821 | F | 0.500 | 0.619  |
| SNF6 | 2007 | 55 | 2 | 54 | 39.551 | F | 0.500 | -0.171 |
| R05C | 2007 | 55 | 2 | 54 | 23.903 | F | 0.500 | -0.079 |
| SNC6 | 2007 | 55 | 2 | 54 | 29.873 | F | 0.500 | -0.137 |
| LAVA | 2007 | 55 | 2 | 54 | 28.616 | F | 0.500 | -0.350 |
| SN75 | 2007 | 55 | 2 | 54 | 16.146 | F | 0.500 | 0.122  |

|      |      |    |    |         |         |           |        |        |       |
|------|------|----|----|---------|---------|-----------|--------|--------|-------|
| 2007 | 77   | 2  | 11 | 12.2787 | 4.58500 | -78.49400 | 7.0000 | 46     | 6.979 |
| SN74 | 2007 | 77 | 2  | 27      | 22.377  | F         | 0.500  | -0.742 |       |
| DBO  | 2007 | 77 | 2  | 28      | 24.688  | F         | 0.500  | -3.806 |       |
| MLAC | 2007 | 77 | 2  | 27      | 12.568  | F         | 0.500  | 2.280  |       |
| U11A | 2007 | 77 | 2  | 26      | 28.088  | F         | 0.500  | 0.194  |       |
| SNB6 | 2007 | 77 | 2  | 27      | 33.392  | F         | 0.500  | 0.611  |       |
| WENL | 2007 | 77 | 2  | 27      | 37.715  | F         | 0.500  | 0.110  |       |
| SNC5 | 2007 | 77 | 2  | 27      | 38.315  | F         | 0.500  | 0.167  |       |
| S09A | 2007 | 77 | 2  | 26      | 56.750  | F         | 0.500  | 1.082  |       |
| ORV  | 2007 | 77 | 2  | 27      | 48.163  | F         | 0.500  | -0.111 |       |
| EDW2 | 2007 | 77 | 2  | 26      | 41.790  | F         | 0.500  | -0.076 |       |
| CIA  | 2007 | 77 | 2  | 26      | 35.936  | F         | 0.500  | 0.291  |       |
| BBR  | 2007 | 77 | 2  | 26      | 27.268  | F         | 0.500  | 0.620  |       |
| SNE6 | 2007 | 77 | 2  | 27      | 42.268  | F         | 0.500  | 0.055  |       |
| SHO  | 2007 | 77 | 2  | 26      | 32.906  | F         | 0.500  | 0.752  |       |
| GRA  | 2007 | 77 | 2  | 26      | 51.969  | F         | 0.500  | 0.646  |       |
| SDD  | 2007 | 77 | 2  | 26      | 29.214  | F         | 0.500  | 0.391  |       |

|      |      |    |   |    |        |   |       |        |
|------|------|----|---|----|--------|---|-------|--------|
| L04A | 2007 | 77 | 2 | 28 | 8.468  | F | 0.500 | -2.188 |
| O07A | 2007 | 77 | 2 | 27 | 28.622 | F | 0.500 | -0.753 |
| SNC6 | 2007 | 77 | 2 | 27 | 36.359 | F | 0.500 | 0.310  |
| OSI  | 2007 | 77 | 2 | 26 | 46.810 | F | 0.500 | -0.496 |
| SNA4 | 2007 | 77 | 2 | 27 | 32.208 | F | 0.500 | -0.121 |
| PASC | 2007 | 77 | 2 | 26 | 38.899 | F | 0.500 | 0.212  |
| SN98 | 2007 | 77 | 2 | 27 | 26.597 | F | 0.500 | 1.452  |
| Q09A | 2007 | 77 | 2 | 27 | 4.652  | F | 0.500 | 0.605  |
| O09A | 2007 | 77 | 2 | 27 | 13.120 | F | 0.500 | -1.535 |
| BFS  | 2007 | 77 | 2 | 26 | 34.151 | F | 0.500 | 0.217  |
| SNC3 | 2007 | 77 | 2 | 27 | 39.253 | F | 0.500 | -0.455 |
| SNB3 | 2007 | 77 | 2 | 27 | 36.429 | F | 0.500 | -0.403 |
| SN63 | 2007 | 77 | 2 | 27 | 19.512 | F | 0.500 | -0.691 |
| HELL | 2007 | 77 | 2 | 27 | 5.402  | F | 0.500 | 0.456  |
| RRX  | 2007 | 77 | 2 | 26 | 31.997 | F | 0.500 | 0.321  |
| SNF6 | 2007 | 77 | 2 | 27 | 46.195 | F | 0.500 | 0.214  |
| SNF8 | 2007 | 77 | 2 | 27 | 44.651 | F | 0.500 | 0.295  |
| SNE9 | 2007 | 77 | 2 | 27 | 40.292 | F | 0.500 | -0.006 |
| MPM  | 2007 | 77 | 2 | 26 | 46.575 | F | 0.500 | 0.938  |
| SN55 | 2007 | 77 | 2 | 27 | 17.676 | F | 0.500 | 0.636  |
| M01C | 2007 | 77 | 2 | 28 | 26.337 | F | 0.500 | -1.030 |
| SNA7 | 2007 | 77 | 2 | 27 | 31.542 | F | 0.500 | 1.176  |
| SNB7 | 2007 | 77 | 2 | 27 | 34.290 | F | 0.500 | 1.273  |
| L02A | 2007 | 77 | 2 | 28 | 22.762 | F | 0.500 | -2.227 |
| SN93 | 2007 | 77 | 2 | 27 | 30.140 | F | 0.500 | -0.245 |
| SN34 | 2007 | 77 | 2 | 27 | 10.754 | F | 0.500 | 0.062  |
| HEC  | 2007 | 77 | 2 | 26 | 25.287 | F | 0.500 | 0.588  |
| SNA3 | 2007 | 77 | 2 | 27 | 32.987 | F | 0.500 | -0.033 |
| SN75 | 2007 | 77 | 2 | 27 | 22.601 | F | 0.500 | 0.326  |
| SND7 | 2007 | 77 | 2 | 27 | 41.320 | F | 0.500 | 0.416  |
| SND8 | 2007 | 77 | 2 | 27 | 38.080 | F | 0.500 | 0.311  |
| P09A | 2007 | 77 | 2 | 27 | 8.151  | F | 0.500 | -1.106 |
| CMB  | 2007 | 77 | 2 | 27 | 27.406 | F | 0.500 | -0.208 |
| R09A | 2007 | 77 | 2 | 26 | 58.747 | F | 0.500 | 0.398  |
| SN64 | 2007 | 77 | 2 | 27 | 19.680 | F | 0.500 | -0.093 |
| SND9 | 2007 | 77 | 2 | 27 | 36.832 | F | 0.500 | -0.370 |
| SN14 | 2007 | 77 | 2 | 27 | 6.863  | F | 0.500 | 0.452  |
| ISA  | 2007 | 77 | 2 | 26 | 52.380 | F | 0.500 | 0.071  |
| SNB9 | 2007 | 77 | 2 | 27 | 30.615 | F | 0.500 | 0.492  |
| Q10A | 2007 | 77 | 2 | 26 | 57.173 | F | 0.500 | 0.319  |
| BEK  | 2007 | 77 | 2 | 27 | 40.774 | F | 0.500 | 0.216  |
| GSC  | 2007 | 77 | 2 | 26 | 33.907 | F | 0.500 | 0.845  |
| S06C | 2007 | 77 | 2 | 27 | 21.051 | F | 0.500 | -0.564 |
| S08C | 2007 | 77 | 2 | 27 | 4.818  | F | 0.500 | 1.517  |
| SN84 | 2007 | 77 | 2 | 27 | 25.717 | F | 0.500 | -0.720 |
| HUMO | 2007 | 77 | 2 | 28 | 19.208 | F | 0.500 | -3.338 |

|      |      |    |   |         |          |           |        |        |  |
|------|------|----|---|---------|----------|-----------|--------|--------|--|
| 2007 | 97   | 7  | 9 | 28.3554 | 37.30600 | -24.49400 | 8.0000 |        |  |
| SNF6 | 2007 | 97 | 7 | 30      | 11.828   | F         | 0.500  | -0.492 |  |
| Q10A | 2007 | 97 | 7 | 29      | 41.723   | F         | 0.500  | -0.179 |  |
| FUR  | 2007 | 97 | 7 | 29      | 59.591   | F         | 0.500  | -0.273 |  |
| RCT  | 2007 | 97 | 7 | 30      | 17.781   | F         | 0.500  | -1.725 |  |
| TIN  | 2007 | 97 | 7 | 30      | 6.557    | F         | 0.500  | -0.652 |  |
| SUTB | 2007 | 97 | 7 | 30      | 19.151   | F         | 0.500  | -0.771 |  |
| R11A | 2007 | 97 | 7 | 29      | 37.529   | F         | 0.500  | -0.825 |  |
| GRA  | 2007 | 97 | 7 | 29      | 59.682   | F         | 0.500  | -0.949 |  |
| SNE9 | 2007 | 97 | 7 | 30      | 3.575    | F         | 0.500  | 0.181  |  |
| TPNV | 2007 | 97 | 7 | 29      | 51.710   | F         | 0.500  | -0.704 |  |
| SND4 | 2007 | 97 | 7 | 30      | 16.028   | F         | 0.500  | -0.629 |  |
| SNB3 | 2007 | 97 | 7 | 30      | 18.588   | F         | 0.500  | 0.295  |  |
| HEC  | 2007 | 97 | 7 | 30      | 7.569    | F         | 0.500  | 1.304  |  |
| L07A | 2007 | 97 | 7 | 29      | 45.781   | F         | 0.500  | 1.110  |  |
| BEK  | 2007 | 97 | 7 | 30      | 5.565    | F         | 0.500  | -0.233 |  |

|      |      |    |   |    |        |   |       |        |
|------|------|----|---|----|--------|---|-------|--------|
| SNE4 | 2007 | 97 | 7 | 30 | 15.867 | F | 0.500 | -0.834 |
| BBR  | 2007 | 97 | 7 | 30 | 15.066 | F | 0.500 | 0.322  |
| N07B | 2007 | 97 | 7 | 29 | 49.135 | F | 0.500 | -0.468 |
| SND9 | 2007 | 97 | 7 | 30 | 3.306  | F | 0.500 | -0.044 |
| O06A | 2007 | 97 | 7 | 30 | 0.146  | F | 0.500 | 0.381  |
| HELL | 2007 | 97 | 7 | 30 | 14.502 | F | 0.500 | -1.060 |
| SN95 | 2007 | 97 | 7 | 30 | 14.366 | F | 0.500 | -0.397 |
| SNE5 | 2007 | 97 | 7 | 30 | 14.060 | F | 0.500 | -0.504 |
| M06C | 2007 | 97 | 7 | 29 | 58.197 | F | 0.500 | 0.177  |
| SHO  | 2007 | 97 | 7 | 29 | 59.678 | F | 0.500 | 0.956  |
| SND8 | 2007 | 97 | 7 | 30 | 6.281  | F | 0.500 | 0.033  |
| O05C | 2007 | 97 | 7 | 30 | 9.004  | F | 0.500 | -0.148 |
| LRL  | 2007 | 97 | 7 | 30 | 13.413 | F | 0.500 | 0.451  |
| S05C | 2007 | 97 | 7 | 30 | 21.636 | F | 0.500 | 0.568  |
| SNC6 | 2007 | 97 | 7 | 30 | 10.853 | F | 0.500 | -0.846 |
| SNC5 | 2007 | 97 | 7 | 30 | 13.292 | F | 0.500 | -0.593 |
| SN34 | 2007 | 97 | 7 | 30 | 12.504 | F | 0.500 | 0.692  |
| O08A | 2007 | 97 | 7 | 29 | 45.704 | F | 0.500 | -0.892 |
| SN14 | 2007 | 97 | 7 | 30 | 11.376 | F | 0.500 | -0.070 |
| SND5 | 2007 | 97 | 7 | 30 | 13.354 | F | 0.500 | -0.793 |
| SN84 | 2007 | 97 | 7 | 30 | 15.042 | F | 0.500 | -0.025 |
| SNE7 | 2007 | 97 | 7 | 30 | 8.896  | F | 0.500 | 0.091  |
| SND7 | 2007 | 97 | 7 | 30 | 9.214  | F | 0.500 | 0.152  |
| SNE6 | 2007 | 97 | 7 | 30 | 11.557 | F | 0.500 | -0.154 |
| SNC7 | 2007 | 97 | 7 | 30 | 9.435  | F | 0.500 | -0.364 |
| SN43 | 2007 | 97 | 7 | 30 | 15.742 | F | 0.500 | 0.731  |
| SN74 | 2007 | 97 | 7 | 30 | 14.806 | F | 0.500 | 0.195  |
| CMB  | 2007 | 97 | 7 | 30 | 17.325 | F | 0.500 | -0.131 |
| SN85 | 2007 | 97 | 7 | 30 | 12.966 | F | 0.500 | -0.020 |
| S06C | 2007 | 97 | 7 | 30 | 15.036 | F | 0.500 | 0.695  |
| SN64 | 2007 | 97 | 7 | 30 | 14.058 | F | 0.500 | 0.647  |
| SN63 | 2007 | 97 | 7 | 30 | 15.877 | F | 0.500 | 0.489  |

|      |      |     |    |         |          |            |          |        |       |
|------|------|-----|----|---------|----------|------------|----------|--------|-------|
| 2007 | 119  | 12  | 41 | 59.2238 | 52.00700 | -179.97200 | 117.0000 | 49     | 1.834 |
| S04C | 2007 | 119 | 12 | 56      | 3.128    | F          | 0.500    | 0.954  |       |
| O10A | 2007 | 119 | 12 | 56      | 19.716   | F          | 0.500    | -0.571 |       |
| RRX  | 2007 | 119 | 12 | 57      | 4.236    | F          | 0.500    | -0.868 |       |
| PKD  | 2007 | 119 | 12 | 56      | 23.877   | F          | 0.500    | 0.060  |       |
| SN55 | 2007 | 119 | 12 | 56      | 17.310   | F          | 0.500    | 0.111  |       |
| WVOR | 2007 | 119 | 12 | 55      | 42.167   | F          | 0.500    | -0.526 |       |
| T05C | 2007 | 119 | 12 | 56      | 15.693   | F          | 0.500    | 2.039  |       |
| L04A | 2007 | 119 | 12 | 55      | 16.321   | F          | 0.500    | 0.744  |       |
| GASB | 2007 | 119 | 12 | 55      | 32.989   | F          | 0.500    | 2.717  |       |
| SN34 | 2007 | 119 | 12 | 56      | 24.403   | F          | 0.500    | 0.381  |       |
| K07A | 2007 | 119 | 12 | 55      | 35.045   | F          | 0.500    | -0.077 |       |
| LGU  | 2007 | 119 | 12 | 56      | 53.070   | F          | 0.500    | -1.227 |       |
| CWC  | 2007 | 119 | 12 | 56      | 40.998   | F          | 0.500    | -0.353 |       |
| RPV  | 2007 | 119 | 12 | 57      | 2.200    | F          | 0.500    | -1.336 |       |
| ADO  | 2007 | 119 | 12 | 57      | 4.434    | F          | 0.500    | -0.150 |       |
| R08A | 2007 | 119 | 12 | 56      | 23.147   | F          | 0.500    | -0.290 |       |
| WENL | 2007 | 119 | 12 | 55      | 58.433   | F          | 0.500    | 1.216  |       |
| VES  | 2007 | 119 | 12 | 56      | 36.139   | F          | 0.500    | -1.484 |       |
| HUMO | 2007 | 119 | 12 | 55      | 3.245    | F          | 0.500    | 1.275  |       |
| SNA7 | 2007 | 119 | 12 | 56      | 1.764    | F          | 0.500    | 0.022  |       |
| V03C | 2007 | 119 | 12 | 56      | 17.319   | F          | 0.500    | 0.572  |       |
| DEC  | 2007 | 119 | 12 | 56      | 58.401   | F          | 0.500    | -0.982 |       |
| MNRC | 2007 | 119 | 12 | 55      | 43.088   | F          | 0.500    | 3.464  |       |
| PIN  | 2007 | 119 | 12 | 55      | 12.350   | F          | 0.500    | 1.104  |       |
| EDW2 | 2007 | 119 | 12 | 56      | 55.226   | F          | 0.500    | -1.105 |       |
| I04A | 2007 | 119 | 12 | 54      | 56.738   | F          | 0.500    | -0.476 |       |
| MPM  | 2007 | 119 | 12 | 56      | 49.499   | F          | 0.500    | -0.618 |       |
| SNA8 | 2007 | 119 | 12 | 56      | 3.533    | F          | 0.500    | -0.079 |       |
| BFS  | 2007 | 119 | 12 | 57      | 5.029    | F          | 0.500    | -0.537 |       |

|      |      |     |    |    |        |   |       |        |
|------|------|-----|----|----|--------|---|-------|--------|
| SND7 | 2007 | 119 | 12 | 55 | 49.108 | F | 0.500 | -0.939 |
| CVS  | 2007 | 119 | 12 | 55 | 45.572 | F | 0.500 | 1.387  |
| SNF6 | 2007 | 119 | 12 | 55 | 44.059 | F | 0.500 | -0.677 |
| Q10A | 2007 | 119 | 12 | 56 | 33.247 | F | 0.500 | -1.082 |
| MPP  | 2007 | 119 | 12 | 56 | 41.399 | F | 0.500 | 0.855  |
| SNC5 | 2007 | 119 | 12 | 55 | 53.490 | F | 0.500 | 0.005  |
| M02C | 2007 | 119 | 12 | 55 | 16.216 | F | 0.500 | 2.789  |
| N09A | 2007 | 119 | 12 | 56 | 5.062  | F | 0.500 | -1.248 |
| SMM  | 2007 | 119 | 12 | 56 | 35.347 | F | 0.500 | 0.682  |
| SVD  | 2007 | 119 | 12 | 57 | 10.661 | F | 0.500 | -0.987 |
| ORV  | 2007 | 119 | 12 | 55 | 41.211 | F | 0.500 | -0.702 |
| FUR  | 2007 | 119 | 12 | 56 | 50.513 | F | 0.500 | -0.768 |
| O09A | 2007 | 119 | 12 | 56 | 14.729 | F | 0.500 | -0.453 |
| SNE7 | 2007 | 119 | 12 | 55 | 46.612 | F | 0.500 | -0.437 |
| GSC  | 2007 | 119 | 12 | 57 | 1.382  | F | 0.500 | -1.529 |
| HAST | 2007 | 119 | 12 | 56 | 10.582 | F | 0.500 | -0.019 |
| CIA  | 2007 | 119 | 12 | 57 | 6.124  | F | 0.500 | -0.624 |
| U05C | 2007 | 119 | 12 | 56 | 25.756 | F | 0.500 | 2.059  |
| V04C | 2007 | 119 | 12 | 56 | 24.775 | F | 0.500 | 1.120  |
| U04C | 2007 | 119 | 12 | 56 | 18.750 | F | 0.500 | 0.943  |
| SN14 | 2007 | 119 | 12 | 56 | 29.481 | F | 0.500 | 0.489  |
| SNE9 | 2007 | 119 | 12 | 55 | 49.669 | F | 0.500 | -0.261 |
| DJJ  | 2007 | 119 | 12 | 56 | 58.343 | F | 0.500 | -1.221 |
| PASC | 2007 | 119 | 12 | 57 | 0.082  | F | 0.500 | -1.270 |
| SNG5 | 2007 | 119 | 12 | 55 | 39.945 | F | 0.500 | -0.244 |
| SND8 | 2007 | 119 | 12 | 55 | 52.083 | F | 0.500 | -0.849 |
| FARB | 2007 | 119 | 12 | 55 | 45.435 | F | 0.500 | 0.392  |
| CHF  | 2007 | 119 | 12 | 57 | 1.324  | F | 0.500 | -0.197 |
| PACP | 2007 | 119 | 12 | 56 | 8.052  | F | 0.500 | 0.771  |
| PHL  | 2007 | 119 | 12 | 56 | 29.233 | F | 0.500 | 0.558  |
| TPNV | 2007 | 119 | 12 | 56 | 52.169 | F | 0.500 | -0.606 |
| R04C | 2007 | 119 | 12 | 55 | 58.714 | F | 0.500 | 0.071  |
| R05C | 2007 | 119 | 12 | 56 | 2.865  | F | 0.500 | -0.111 |
| SN84 | 2007 | 119 | 12 | 56 | 7.315  | F | 0.500 | 0.094  |
| O04C | 2007 | 119 | 12 | 55 | 39.818 | F | 0.500 | 0.654  |
| SNE6 | 2007 | 119 | 12 | 55 | 47.996 | F | 0.500 | -0.784 |
| SNC7 | 2007 | 119 | 12 | 55 | 53.580 | F | 0.500 | -1.071 |
| SNE4 | 2007 | 119 | 12 | 55 | 45.914 | F | 0.500 | -0.084 |
| BEK  | 2007 | 119 | 12 | 55 | 49.137 | F | 0.500 | -0.711 |
| HELL | 2007 | 119 | 12 | 56 | 29.842 | F | 0.500 | -0.819 |
| BBR  | 2007 | 119 | 12 | 57 | 11.026 | F | 0.500 | -1.055 |
| DGR  | 2007 | 119 | 12 | 57 | 15.232 | F | 0.500 | -1.354 |
| SNA4 | 2007 | 119 | 12 | 56 | 0.429  | F | 0.500 | 0.107  |
| SN43 | 2007 | 119 | 12 | 56 | 20.053 | F | 0.500 | -0.051 |
| SNF9 | 2007 | 119 | 12 | 55 | 46.340 | F | 0.500 | -0.243 |
| S05C | 2007 | 119 | 12 | 56 | 12.190 | F | 0.500 | -0.389 |
| SNC8 | 2007 | 119 | 12 | 55 | 55.813 | F | 0.500 | -0.546 |
| MUR  | 2007 | 119 | 12 | 57 | 14.541 | F | 0.500 | -0.892 |
| SNG7 | 2007 | 119 | 12 | 55 | 40.749 | F | 0.500 | 0.475  |
| VTV  | 2007 | 119 | 12 | 57 | 4.556  | F | 0.500 | -0.694 |
| SN75 | 2007 | 119 | 12 | 56 | 11.889 | F | 0.500 | 0.170  |
| SND5 | 2007 | 119 | 12 | 55 | 50.286 | F | 0.500 | -0.162 |
| SNE5 | 2007 | 119 | 12 | 55 | 46.145 | F | 0.500 | -0.530 |
| SN63 | 2007 | 119 | 12 | 56 | 14.178 | F | 0.500 | -0.133 |
| SN64 | 2007 | 119 | 12 | 56 | 14.643 | F | 0.500 | 0.121  |
| SNC3 | 2007 | 119 | 12 | 55 | 53.808 | F | 0.500 | 1.555  |
| SND4 | 2007 | 119 | 12 | 55 | 49.857 | F | 0.500 | 0.281  |
| SN85 | 2007 | 119 | 12 | 56 | 8.043  | F | 0.500 | 0.176  |
| PLM  | 2007 | 119 | 12 | 57 | 20.722 | F | 0.500 | -0.306 |
| SN95 | 2007 | 119 | 12 | 56 | 4.998  | F | 0.500 | 0.456  |
| SN74 | 2007 | 119 | 12 | 56 | 10.748 | F | 0.500 | 0.147  |
| JCS  | 2007 | 119 | 12 | 57 | 25.780 | F | 0.500 | -0.043 |
| SNB3 | 2007 | 119 | 12 | 55 | 56.636 | F | 0.500 | 1.167  |

|      |      |     |    |    |       |   |       |       |
|------|------|-----|----|----|-------|---|-------|-------|
| SN93 | 2007 | 119 | 12 | 56 | 3.587 | F | 0.500 | 0.932 |
| SNA3 | 2007 | 119 | 12 | 56 | 0.508 | F | 0.500 | 0.811 |
| CMB  | 2007 | 119 | 12 | 56 | 6.673 | F | 0.500 | 0.845 |

|      |     |    |    |         |           |           |          |    |       |
|------|-----|----|----|---------|-----------|-----------|----------|----|-------|
| 2007 | 145 | 17 | 47 | 34.6378 | -24.22200 | -67.02700 | 180.5000 | 50 | 3.378 |
|------|-----|----|----|---------|-----------|-----------|----------|----|-------|

|      |      |     |    |   |        |   |       |        |
|------|------|-----|----|---|--------|---|-------|--------|
| R05C | 2007 | 145 | 18 | 9 | 12.408 | F | 0.500 | -0.226 |
| MPP  | 2007 | 145 | 18 | 8 | 43.652 | F | 0.500 | 0.006  |
| SN34 | 2007 | 145 | 18 | 8 | 55.919 | F | 0.500 | -0.932 |
| M06C | 2007 | 145 | 18 | 9 | 31.029 | F | 0.500 | -0.553 |
| R08A | 2007 | 145 | 18 | 8 | 58.547 | F | 0.500 | 0.692  |
| V05C | 2007 | 145 | 18 | 8 | 51.381 | F | 0.500 | 0.302  |
| U10A | 2007 | 145 | 18 | 8 | 33.770 | F | 0.500 | 1.385  |
| RCT  | 2007 | 145 | 18 | 8 | 48.125 | F | 0.500 | -1.739 |
| Q09A | 2007 | 145 | 18 | 8 | 56.465 | F | 0.500 | 0.637  |
| ARV  | 2007 | 145 | 18 | 8 | 38.760 | F | 0.500 | 0.299  |
| BDM  | 2007 | 145 | 18 | 9 | 17.943 | F | 0.500 | 0.136  |
| Q10A | 2007 | 145 | 18 | 8 | 52.194 | F | 0.500 | 1.138  |
| DEC  | 2007 | 145 | 18 | 8 | 29.325 | F | 0.500 | 0.350  |
| HAST | 2007 | 145 | 18 | 9 | 5.389  | F | 0.500 | 0.112  |
| TPH  | 2007 | 145 | 18 | 8 | 51.517 | F | 0.500 | 1.146  |
| PLM  | 2007 | 145 | 18 | 8 | 14.356 | F | 0.500 | 1.606  |
| SN87 | 2007 | 145 | 18 | 9 | 10.322 | F | 0.500 | 0.553  |
| SUTB | 2007 | 145 | 18 | 9 | 24.777 | F | 0.500 | -1.062 |
| J08A | 2007 | 145 | 18 | 9 | 35.296 | F | 0.500 | -0.220 |
| PKD  | 2007 | 145 | 18 | 8 | 56.038 | F | 0.500 | 0.303  |
| RRX  | 2007 | 145 | 18 | 8 | 25.294 | F | 0.500 | 0.289  |
| FUR  | 2007 | 145 | 18 | 8 | 37.004 | F | 0.500 | 1.205  |
| SNE9 | 2007 | 145 | 18 | 9 | 22.488 | F | 0.500 | 0.334  |
| V04C | 2007 | 145 | 18 | 8 | 56.086 | F | 0.500 | 0.298  |
| L07A | 2007 | 145 | 18 | 9 | 30.397 | F | 0.500 | -0.535 |
| SNB7 | 2007 | 145 | 18 | 9 | 15.522 | F | 0.500 | 0.242  |
| SN98 | 2007 | 145 | 18 | 9 | 10.330 | F | 0.500 | 0.391  |
| PHL  | 2007 | 145 | 18 | 8 | 51.427 | F | 0.500 | -0.612 |
| J07A | 2007 | 145 | 18 | 9 | 39.870 | F | 0.500 | -0.012 |
| O04C | 2007 | 145 | 18 | 9 | 28.285 | F | 0.500 | -0.955 |
| GRA  | 2007 | 145 | 18 | 8 | 44.799 | F | 0.500 | 1.629  |
| SLA  | 2007 | 145 | 18 | 8 | 34.902 | F | 0.500 | 0.481  |
| L08A | 2007 | 145 | 18 | 9 | 24.595 | F | 0.500 | -1.998 |
| K07A | 2007 | 145 | 18 | 9 | 34.671 | F | 0.500 | -0.475 |
| J05A | 2007 | 145 | 18 | 9 | 49.774 | F | 0.500 | 2.609  |
| O09A | 2007 | 145 | 18 | 9 | 5.336  | F | 0.500 | -0.299 |
| EDW2 | 2007 | 145 | 18 | 8 | 30.459 | F | 0.500 | -1.065 |
| SHO  | 2007 | 145 | 18 | 8 | 28.852 | F | 0.500 | 1.018  |
| O06A | 2007 | 145 | 18 | 9 | 21.221 | F | 0.500 | 0.346  |
| SNA4 | 2007 | 145 | 18 | 9 | 12.927 | F | 0.500 | -0.653 |
| S08C | 2007 | 145 | 18 | 8 | 52.923 | F | 0.500 | 0.591  |
| VCS  | 2007 | 145 | 18 | 8 | 29.261 | F | 0.500 | -0.235 |
| SNG7 | 2007 | 145 | 18 | 9 | 27.357 | F | 0.500 | -0.910 |
| SN97 | 2007 | 145 | 18 | 9 | 11.936 | F | 0.500 | 0.424  |
| BFS  | 2007 | 145 | 18 | 8 | 25.058 | F | 0.500 | 0.369  |
| N10A | 2007 | 145 | 18 | 9 | 5.242  | F | 0.500 | -0.661 |
| MUR  | 2007 | 145 | 18 | 8 | 17.709 | F | 0.500 | 1.075  |
| MPM  | 2007 | 145 | 18 | 8 | 38.006 | F | 0.500 | 0.739  |
| SNF8 | 2007 | 145 | 18 | 9 | 24.537 | F | 0.500 | -0.279 |
| WCN  | 2007 | 145 | 18 | 9 | 15.434 | F | 0.500 | 0.804  |
| SND4 | 2007 | 145 | 18 | 9 | 19.589 | F | 0.500 | -1.209 |
| SNC8 | 2007 | 145 | 18 | 9 | 18.284 | F | 0.500 | 0.647  |
| HEC  | 2007 | 145 | 18 | 8 | 21.665 | F | 0.500 | 1.304  |
| SNC6 | 2007 | 145 | 18 | 9 | 16.735 | F | 0.500 | -0.584 |
| I06A | 2007 | 145 | 18 | 9 | 48.944 | F | 0.500 | 2.600  |
| P09A | 2007 | 145 | 18 | 9 | 0.385  | F | 0.500 | -0.533 |
| I08A | 2007 | 145 | 18 | 9 | 39.205 | F | 0.500 | -0.408 |
| SND5 | 2007 | 145 | 18 | 9 | 19.638 | F | 0.500 | -0.827 |

|      |      |     |    |   |        |   |       |        |
|------|------|-----|----|---|--------|---|-------|--------|
| DGR  | 2007 | 145 | 18 | 8 | 17.348 | F | 0.500 | 1.529  |
| SN84 | 2007 | 145 | 18 | 9 | 8.255  | F | 0.500 | -0.644 |
| SNA3 | 2007 | 145 | 18 | 9 | 13.203 | F | 0.500 | -0.534 |
| PASC | 2007 | 145 | 18 | 8 | 27.733 | F | 0.500 | 0.270  |
| SN64 | 2007 | 145 | 18 | 9 | 3.901  | F | 0.500 | -0.040 |
| SND9 | 2007 | 145 | 18 | 9 | 20.315 | F | 0.500 | 0.652  |
| GSC  | 2007 | 145 | 18 | 8 | 28.256 | F | 0.500 | 1.205  |
| N08A | 2007 | 145 | 18 | 9 | 14.747 | F | 0.500 | -0.755 |
| SN63 | 2007 | 145 | 18 | 9 | 3.171  | F | 0.500 | -0.679 |
| SNB3 | 2007 | 145 | 18 | 9 | 15.853 | F | 0.500 | -0.658 |
| SNA7 | 2007 | 145 | 18 | 9 | 13.768 | F | 0.500 | 0.169  |
| BEK  | 2007 | 145 | 18 | 9 | 22.195 | F | 0.500 | 0.287  |
| O05C | 2007 | 145 | 18 | 9 | 25.465 | F | 0.500 | -0.249 |
| N09A | 2007 | 145 | 18 | 9 | 11.477 | F | 0.500 | -0.968 |
| SND8 | 2007 | 145 | 18 | 9 | 20.153 | F | 0.500 | 0.388  |
| HELL | 2007 | 145 | 18 | 8 | 49.990 | F | 0.500 | -1.233 |
| CHF  | 2007 | 145 | 18 | 8 | 27.787 | F | 0.500 | 0.119  |
| LAVA | 2007 | 145 | 18 | 9 | 15.616 | F | 0.500 | -0.842 |
| P05C | 2007 | 145 | 18 | 9 | 19.360 | F | 0.500 | -0.151 |
| SNF6 | 2007 | 145 | 18 | 9 | 24.222 | F | 0.500 | -0.923 |
| SNE6 | 2007 | 145 | 18 | 9 | 21.980 | F | 0.500 | -0.186 |
| LRL  | 2007 | 145 | 18 | 8 | 34.309 | F | 0.500 | 0.363  |
| R04C | 2007 | 145 | 18 | 9 | 13.870 | F | 0.500 | -0.079 |
| SNE7 | 2007 | 145 | 18 | 9 | 23.639 | F | 0.500 | -0.196 |
| SNB5 | 2007 | 145 | 18 | 9 | 15.194 | F | 0.500 | -0.856 |
| SN43 | 2007 | 145 | 18 | 8 | 58.232 | F | 0.500 | -1.467 |
| SN85 | 2007 | 145 | 18 | 9 | 8.601  | F | 0.500 | -0.151 |
| ORV  | 2007 | 145 | 18 | 9 | 25.874 | F | 0.500 | -0.230 |
| SNG5 | 2007 | 145 | 18 | 9 | 27.043 | F | 0.500 | -0.748 |
| SN74 | 2007 | 145 | 18 | 9 | 5.994  | F | 0.500 | -0.397 |
| CMB  | 2007 | 145 | 18 | 9 | 8.869  | F | 0.500 | -0.549 |
| SN95 | 2007 | 145 | 18 | 9 | 10.140 | F | 0.500 | -0.822 |
| S06C | 2007 | 145 | 18 | 9 | 4.654  | F | 0.500 | -0.440 |
| ELFS | 2007 | 145 | 18 | 9 | 29.099 | F | 0.500 | -0.263 |

|      |      |     |    |         |          |           |          |        |       |
|------|------|-----|----|---------|----------|-----------|----------|--------|-------|
| 2007 | 150  | 20  | 22 | 20.7010 | 52.13700 | 157.29300 | 116.0000 | 51     | 8.041 |
| SN97 | 2007 | 150 | 20 | 39      | 34.418   | F         | 0.500    | 0.320  |       |
| P07A | 2007 | 150 | 20 | 39      | 34.663   | F         | 0.500    | 0.326  |       |
| R10A | 2007 | 150 | 20 | 40      | 4.860    | F         | 0.500    | 0.073  |       |
| MCCM | 2007 | 150 | 20 | 39      | 16.384   | F         | 0.500    | 0.467  |       |
| PKD  | 2007 | 150 | 20 | 39      | 54.207   | F         | 0.500    | 0.219  |       |
| O03C | 2007 | 150 | 20 | 39      | 6.229    | F         | 0.500    | 0.215  |       |
| ELFS | 2007 | 150 | 20 | 39      | 11.123   | F         | 0.500    | 0.443  |       |
| SNA8 | 2007 | 150 | 20 | 39      | 33.364   | F         | 0.500    | 0.273  |       |
| MNRC | 2007 | 150 | 20 | 39      | 16.101   | F         | 0.500    | 3.012  |       |
| U05C | 2007 | 150 | 20 | 39      | 54.798   | F         | 0.500    | 1.394  |       |
| SDD  | 2007 | 150 | 20 | 40      | 36.433   | F         | 0.500    | -0.637 |       |
| P06A | 2007 | 150 | 20 | 39      | 25.255   | F         | 0.500    | -0.061 |       |
| Q03C | 2007 | 150 | 20 | 39      | 21.205   | F         | 0.500    | 2.858  |       |
| HATC | 2007 | 150 | 20 | 39      | 3.582    | F         | 0.500    | 0.281  |       |
| SNCC | 2007 | 150 | 20 | 40      | 25.886   | F         | 0.500    | -0.316 |       |
| MLAC | 2007 | 150 | 20 | 39      | 54.621   | F         | 0.500    | 2.521  |       |
| I06A | 2007 | 150 | 20 | 38      | 44.438   | F         | 0.500    | -0.716 |       |
| DBO  | 2007 | 150 | 20 | 38      | 28.999   | F         | 0.500    | -0.284 |       |
| K04A | 2007 | 150 | 20 | 38      | 44.945   | F         | 0.500    | -0.355 |       |
| RPV  | 2007 | 150 | 20 | 40      | 28.869   | F         | 0.500    | -1.141 |       |
| J04A | 2007 | 150 | 20 | 38      | 36.343   | F         | 0.500    | -0.871 |       |
| V03C | 2007 | 150 | 20 | 39      | 47.993   | F         | 0.500    | 0.133  |       |
| CVS  | 2007 | 150 | 20 | 39      | 18.983   | F         | 0.500    | 1.388  |       |
| Q04C | 2007 | 150 | 20 | 39      | 22.186   | F         | 0.500    | 0.859  |       |
| M08A | 2007 | 150 | 20 | 39      | 20.615   | F         | 0.500    | -0.451 |       |
| SVD  | 2007 | 150 | 20 | 40      | 35.144   | F         | 0.500    | -1.369 |       |
| FUR  | 2007 | 150 | 20 | 40      | 16.728   | F         | 0.500    | 0.241  |       |

|      |      |     |    |    |        |   |       |        |
|------|------|-----|----|----|--------|---|-------|--------|
| SCZ2 | 2007 | 150 | 20 | 40 | 17.607 | F | 0.500 | -0.803 |
| SBC  | 2007 | 150 | 20 | 40 | 13.958 | F | 0.500 | 0.124  |
| GSC  | 2007 | 150 | 20 | 40 | 27.301 | F | 0.500 | -0.439 |
| T05C | 2007 | 150 | 20 | 39 | 45.740 | F | 0.500 | 1.396  |
| GRA  | 2007 | 150 | 20 | 40 | 9.097  | F | 0.500 | 0.897  |
| K02A | 2007 | 150 | 20 | 38 | 30.535 | F | 0.500 | 0.235  |
| K06A | 2007 | 150 | 20 | 38 | 54.705 | F | 0.500 | -0.287 |
| FMP  | 2007 | 150 | 20 | 40 | 29.916 | F | 0.500 | -0.930 |
| SMM  | 2007 | 150 | 20 | 40 | 4.159  | F | 0.500 | 0.272  |
| VES  | 2007 | 150 | 20 | 40 | 4.213  | F | 0.500 | -1.581 |
| RCT  | 2007 | 150 | 20 | 39 | 59.164 | F | 0.500 | -1.104 |
| DEC  | 2007 | 150 | 20 | 40 | 25.258 | F | 0.500 | -0.667 |
| SNC3 | 2007 | 150 | 20 | 39 | 24.991 | F | 0.500 | 1.068  |
| ADO  | 2007 | 150 | 20 | 40 | 29.755 | F | 0.500 | -0.347 |
| HAST | 2007 | 150 | 20 | 39 | 42.299 | F | 0.500 | 0.027  |
| S04C | 2007 | 150 | 20 | 39 | 34.246 | F | 0.500 | 0.335  |
| ARV  | 2007 | 150 | 20 | 40 | 13.192 | F | 0.500 | -1.004 |
| Q10A | 2007 | 150 | 20 | 39 | 59.411 | F | 0.500 | 0.265  |
| DGR  | 2007 | 150 | 20 | 40 | 39.936 | F | 0.500 | -1.154 |
| I03A | 2007 | 150 | 20 | 38 | 20.944 | F | 0.500 | -0.354 |
| GASB | 2007 | 150 | 20 | 39 | 5.977  | F | 0.500 | 1.851  |
| LGU  | 2007 | 150 | 20 | 40 | 20.536 | F | 0.500 | -1.278 |
| O10A | 2007 | 150 | 20 | 39 | 46.178 | F | 0.500 | 1.014  |
| BFS  | 2007 | 150 | 20 | 40 | 30.830 | F | 0.500 | -0.384 |
| BDM  | 2007 | 150 | 20 | 39 | 26.923 | F | 0.500 | 1.300  |
| SNC8 | 2007 | 150 | 20 | 39 | 26.331 | F | 0.500 | -0.176 |
| VTV  | 2007 | 150 | 20 | 40 | 30.279 | F | 0.500 | -0.295 |
| HUMO | 2007 | 150 | 20 | 38 | 35.704 | F | 0.500 | -0.072 |
| Q09A | 2007 | 150 | 20 | 39 | 53.908 | F | 0.500 | 0.635  |
| BNLO | 2007 | 150 | 20 | 39 | 30.804 | F | 0.500 | 0.022  |
| I04A | 2007 | 150 | 20 | 38 | 28.096 | F | 0.500 | -1.622 |
| U04C | 2007 | 150 | 20 | 39 | 49.290 | F | 0.500 | 0.852  |
| L02A | 2007 | 150 | 20 | 38 | 35.636 | F | 0.500 | 0.903  |
| JRSC | 2007 | 150 | 20 | 39 | 27.930 | F | 0.500 | 0.171  |
| I08A | 2007 | 150 | 20 | 38 | 57.578 | F | 0.500 | -0.180 |
| PASC | 2007 | 150 | 20 | 40 | 26.504 | F | 0.500 | -1.138 |
| K05A | 2007 | 150 | 20 | 38 | 50.959 | F | 0.500 | 0.133  |
| CIA  | 2007 | 150 | 20 | 40 | 31.941 | F | 0.500 | -1.118 |
| SLA  | 2007 | 150 | 20 | 40 | 18.512 | F | 0.500 | -0.566 |
| SND9 | 2007 | 150 | 20 | 39 | 23.145 | F | 0.500 | -0.294 |
| HOPS | 2007 | 150 | 20 | 39 | 8.953  | F | 0.500 | 1.884  |
| WENL | 2007 | 150 | 20 | 39 | 30.504 | F | 0.500 | 0.995  |
| SHO  | 2007 | 150 | 20 | 40 | 26.708 | F | 0.500 | 0.480  |
| O04C | 2007 | 150 | 20 | 39 | 10.919 | F | 0.500 | 0.193  |
| RRX  | 2007 | 150 | 20 | 40 | 30.167 | F | 0.500 | 0.107  |
| DJJ  | 2007 | 150 | 20 | 40 | 25.098 | F | 0.500 | -1.119 |
| V04C | 2007 | 150 | 20 | 39 | 54.975 | F | 0.500 | 0.837  |
| BBR  | 2007 | 150 | 20 | 40 | 35.781 | F | 0.500 | -0.971 |
| SNG7 | 2007 | 150 | 20 | 39 | 11.845 | F | 0.500 | -0.142 |
| M05C | 2007 | 150 | 20 | 39 | 1.049  | F | 0.500 | 0.073  |
| J06A | 2007 | 150 | 20 | 38 | 51.303 | F | 0.500 | -0.548 |
| SN87 | 2007 | 150 | 20 | 39 | 37.228 | F | 0.500 | 0.353  |
| JCS  | 2007 | 150 | 20 | 40 | 49.113 | F | 0.500 | -0.402 |
| YBH  | 2007 | 150 | 20 | 38 | 46.470 | F | 0.500 | 1.007  |
| PHL  | 2007 | 150 | 20 | 39 | 58.758 | F | 0.500 | 0.115  |
| FARB | 2007 | 150 | 20 | 39 | 19.084 | F | 0.500 | 0.084  |
| OSI  | 2007 | 150 | 20 | 40 | 19.587 | F | 0.500 | -0.250 |
| PLM  | 2007 | 150 | 20 | 40 | 44.592 | F | 0.500 | -0.606 |
| SNG5 | 2007 | 150 | 20 | 39 | 11.586 | F | 0.500 | -0.812 |
| J05A | 2007 | 150 | 20 | 38 | 43.303 | F | 0.500 | 0.073  |
| MWC  | 2007 | 150 | 20 | 40 | 27.618 | F | 0.500 | -0.994 |
| MPP  | 2007 | 150 | 20 | 40 | 9.997  | F | 0.500 | 0.649  |
| M02C | 2007 | 150 | 20 | 38 | 48.776 | F | 0.500 | 1.460  |

|      |      |     |    |    |        |   |       |        |
|------|------|-----|----|----|--------|---|-------|--------|
| SNB3 | 2007 | 150 | 20 | 39 | 27.622 | F | 0.500 | 0.719  |
| SNE9 | 2007 | 150 | 20 | 39 | 19.518 | F | 0.500 | -0.761 |
| O02C | 2007 | 150 | 20 | 39 | 0.249  | F | 0.500 | 1.439  |
| CWC  | 2007 | 150 | 20 | 40 | 8.459  | F | 0.500 | 0.099  |
| O05C | 2007 | 150 | 20 | 39 | 14.503 | F | 0.500 | -0.488 |
| SNB7 | 2007 | 150 | 20 | 39 | 29.104 | F | 0.500 | -0.295 |
| BEK  | 2007 | 150 | 20 | 39 | 19.387 | F | 0.500 | -1.051 |
| MUR  | 2007 | 150 | 20 | 40 | 39.075 | F | 0.500 | -1.075 |
| S05C | 2007 | 150 | 20 | 39 | 42.368 | F | 0.500 | -0.506 |
| R06C | 2007 | 150 | 20 | 39 | 39.766 | F | 0.500 | 0.423  |
| P01C | 2007 | 150 | 20 | 39 | 2.878  | F | 0.500 | 2.308  |
| EDW2 | 2007 | 150 | 20 | 40 | 22.078 | F | 0.500 | -0.572 |
| SUTB | 2007 | 150 | 20 | 39 | 14.349 | F | 0.500 | -0.448 |
| WDC  | 2007 | 150 | 20 | 38 | 57.308 | F | 0.500 | 0.494  |
| SNC7 | 2007 | 150 | 20 | 39 | 24.326 | F | 0.500 | -0.921 |
| CHF  | 2007 | 150 | 20 | 40 | 27.411 | F | 0.500 | -0.250 |
| SND8 | 2007 | 150 | 20 | 39 | 22.598 | F | 0.500 | -0.694 |
| SNF8 | 2007 | 150 | 20 | 39 | 16.160 | F | 0.500 | -0.878 |
| MPM  | 2007 | 150 | 20 | 40 | 15.985 | F | 0.500 | -0.174 |
| SNE7 | 2007 | 150 | 20 | 39 | 17.265 | F | 0.500 | -0.824 |
| ORV  | 2007 | 150 | 20 | 39 | 13.064 | F | 0.500 | -1.034 |
| O07A | 2007 | 150 | 20 | 39 | 28.525 | F | 0.500 | -0.232 |
| WVOR | 2007 | 150 | 20 | 39 | 9.734  | F | 0.500 | -0.483 |
| L07A | 2007 | 150 | 20 | 39 | 8.593  | F | 0.500 | -0.354 |
| LRL  | 2007 | 150 | 20 | 40 | 18.804 | F | 0.500 | -1.049 |
| SNA7 | 2007 | 150 | 20 | 39 | 31.905 | F | 0.500 | 0.290  |
| TPNV | 2007 | 150 | 20 | 40 | 17.950 | F | 0.500 | 0.711  |
| SNA3 | 2007 | 150 | 20 | 39 | 31.234 | F | 0.500 | 0.563  |
| SN93 | 2007 | 150 | 20 | 39 | 34.298 | F | 0.500 | 0.866  |
| O06A | 2007 | 150 | 20 | 39 | 20.976 | F | 0.500 | -0.695 |
| SNE6 | 2007 | 150 | 20 | 39 | 18.936 | F | 0.500 | -1.140 |
| P09A | 2007 | 150 | 20 | 39 | 47.855 | F | 0.500 | 0.648  |
| HEC  | 2007 | 150 | 20 | 40 | 35.565 | F | 0.500 | 0.080  |
| R09A | 2007 | 150 | 20 | 39 | 59.974 | F | 0.500 | 0.437  |
| SNA4 | 2007 | 150 | 20 | 39 | 31.227 | F | 0.500 | 0.161  |
| SNF6 | 2007 | 150 | 20 | 39 | 15.443 | F | 0.500 | -0.870 |
| SNE4 | 2007 | 150 | 20 | 39 | 17.644 | F | 0.500 | -0.267 |
| HELL | 2007 | 150 | 20 | 39 | 58.321 | F | 0.500 | -0.671 |
| SND4 | 2007 | 150 | 20 | 39 | 21.231 | F | 0.500 | -0.070 |
| P05C | 2007 | 150 | 20 | 39 | 22.619 | F | 0.500 | -0.914 |
| S09A | 2007 | 150 | 20 | 40 | 4.306  | F | 0.500 | 1.193  |
| SND7 | 2007 | 150 | 20 | 39 | 19.769 | F | 0.500 | -1.143 |
| SN96 | 2007 | 150 | 20 | 39 | 35.695 | F | 0.500 | 0.305  |
| SND5 | 2007 | 150 | 20 | 39 | 21.187 | F | 0.500 | -0.623 |
| SNB9 | 2007 | 150 | 20 | 39 | 31.127 | F | 0.500 | 0.448  |
| SNF9 | 2007 | 150 | 20 | 39 | 16.438 | F | 0.500 | -0.719 |
| S10A | 2007 | 150 | 20 | 40 | 6.526  | F | 0.500 | 0.584  |
| K07A | 2007 | 150 | 20 | 39 | 3.171  | F | 0.500 | -0.305 |
| K10A | 2007 | 150 | 20 | 39 | 20.397 | F | 0.500 | 0.090  |
| SNB5 | 2007 | 150 | 20 | 39 | 27.957 | F | 0.500 | -0.115 |
| L10A | 2007 | 150 | 20 | 39 | 29.994 | F | 0.500 | 0.525  |
| SNC5 | 2007 | 150 | 20 | 39 | 24.385 | F | 0.500 | -0.172 |
| SN63 | 2007 | 150 | 20 | 39 | 43.909 | F | 0.500 | -0.053 |
| LAVA | 2007 | 150 | 20 | 39 | 27.243 | F | 0.500 | 0.040  |
| SNC6 | 2007 | 150 | 20 | 39 | 26.067 | F | 0.500 | -0.624 |
| SN75 | 2007 | 150 | 20 | 39 | 41.627 | F | 0.500 | 0.315  |
| CMB  | 2007 | 150 | 20 | 39 | 36.966 | F | 0.500 | 0.670  |
| N09A | 2007 | 150 | 20 | 39 | 32.304 | F | 0.500 | -0.287 |
| SN64 | 2007 | 150 | 20 | 39 | 44.325 | F | 0.500 | 0.353  |

2007 182 4 12 9.2762 43.66300 144.73399 130.4000

|      |      |     |   |    |        |   |       |        |
|------|------|-----|---|----|--------|---|-------|--------|
| ELFS | 2007 | 182 | 4 | 31 | 23.402 | F | 0.500 | 0.800  |
| SNF8 | 2007 | 182 | 4 | 31 | 27.208 | F | 0.500 | -0.801 |



|      |      |     |   |    |        |   |       |        |
|------|------|-----|---|----|--------|---|-------|--------|
| MWC  | 2007 | 182 | 4 | 32 | 28.569 | F | 0.500 | -1.428 |
| J10A | 2007 | 182 | 4 | 31 | 30.050 | F | 0.500 | 0.589  |
| Q10A | 2007 | 182 | 4 | 32 | 7.092  | F | 0.500 | 0.153  |
| SN87 | 2007 | 182 | 4 | 31 | 45.449 | F | 0.500 | -0.089 |
| M05C | 2007 | 182 | 4 | 31 | 14.872 | F | 0.500 | 0.742  |
| YBH  | 2007 | 182 | 4 | 31 | 1.461  | F | 0.500 | 1.767  |
| R05C | 2007 | 182 | 4 | 31 | 41.583 | F | 0.500 | -0.343 |
| N09A | 2007 | 182 | 4 | 31 | 44.001 | F | 0.500 | 0.302  |
| J04A | 2007 | 182 | 4 | 30 | 54.596 | F | 0.500 | 1.122  |
| SLA  | 2007 | 182 | 4 | 32 | 21.903 | F | 0.500 | -0.925 |
| M04C | 2007 | 182 | 4 | 31 | 6.737  | F | 0.500 | 0.791  |
| M06C | 2007 | 182 | 4 | 31 | 20.660 | F | 0.500 | 0.459  |
| R07C | 2007 | 182 | 4 | 31 | 54.249 | F | 0.500 | 0.221  |
| R06C | 2007 | 182 | 4 | 31 | 47.547 | F | 0.500 | -0.204 |
| HEC  | 2007 | 182 | 4 | 32 | 36.563 | F | 0.500 | -0.820 |
| SN98 | 2007 | 182 | 4 | 31 | 44.432 | F | 0.500 | -0.386 |
| DBO  | 2007 | 182 | 4 | 30 | 47.627 | F | 0.500 | 1.863  |
| SHO  | 2007 | 182 | 4 | 32 | 29.218 | F | 0.500 | -0.475 |
| SND5 | 2007 | 182 | 4 | 31 | 31.081 | F | 0.500 | -0.566 |
| S08C | 2007 | 182 | 4 | 32 | 6.048  | F | 0.500 | 1.203  |
| PLM  | 2007 | 182 | 4 | 32 | 44.189 | F | 0.500 | -0.756 |
| MUR  | 2007 | 182 | 4 | 32 | 38.689 | F | 0.500 | -1.630 |
| K08A | 2007 | 182 | 4 | 31 | 24.113 | F | 0.500 | 1.309  |
| L09A | 2007 | 182 | 4 | 31 | 35.169 | F | 0.500 | 1.132  |
| SN93 | 2007 | 182 | 4 | 31 | 42.242 | F | 0.500 | 0.678  |
| O04C | 2007 | 182 | 4 | 31 | 22.621 | F | 0.500 | 0.300  |
| BEK  | 2007 | 182 | 4 | 31 | 30.529 | F | 0.500 | -0.614 |
| SN97 | 2007 | 182 | 4 | 31 | 42.541 | F | 0.500 | -0.460 |
| EDW2 | 2007 | 182 | 4 | 32 | 24.246 | F | 0.500 | -0.779 |
| S10A | 2007 | 182 | 4 | 32 | 12.457 | F | 0.500 | -0.057 |
| SN55 | 2007 | 182 | 4 | 31 | 53.722 | F | 0.500 | 0.137  |
| HELL | 2007 | 182 | 4 | 32 | 3.455  | F | 0.500 | -0.968 |
| ORV  | 2007 | 182 | 4 | 31 | 23.826 | F | 0.500 | -0.862 |
| N08A | 2007 | 182 | 4 | 31 | 39.968 | F | 0.500 | -0.114 |
| L08A | 2007 | 182 | 4 | 31 | 29.258 | F | 0.500 | 1.383  |
| SNF6 | 2007 | 182 | 4 | 31 | 26.079 | F | 0.500 | -0.872 |
| SUTB | 2007 | 182 | 4 | 31 | 24.688 | F | 0.500 | -0.240 |
| TPNV | 2007 | 182 | 4 | 32 | 22.176 | F | 0.500 | -0.100 |
| SN63 | 2007 | 182 | 4 | 31 | 50.869 | F | 0.500 | -0.382 |
| CMB  | 2007 | 182 | 4 | 31 | 44.617 | F | 0.500 | 0.435  |
| SN64 | 2007 | 182 | 4 | 31 | 51.309 | F | 0.500 | -0.153 |
| SN96 | 2007 | 182 | 4 | 31 | 43.678 | F | 0.500 | -0.204 |
| SNG5 | 2007 | 182 | 4 | 31 | 22.608 | F | 0.500 | -0.591 |
| S06C | 2007 | 182 | 4 | 31 | 49.273 | F | 0.500 | -0.252 |
| SND8 | 2007 | 182 | 4 | 31 | 33.172 | F | 0.500 | -0.441 |
| SNA3 | 2007 | 182 | 4 | 31 | 39.613 | F | 0.500 | 0.413  |
| SND7 | 2007 | 182 | 4 | 31 | 30.413 | F | 0.500 | -0.869 |
| SNB9 | 2007 | 182 | 4 | 31 | 40.665 | F | 0.500 | 0.320  |
| SNA4 | 2007 | 182 | 4 | 31 | 39.792 | F | 0.500 | 0.056  |
| I09A | 2007 | 182 | 4 | 31 | 21.175 | F | 0.500 | 2.483  |
| WCN  | 2007 | 182 | 4 | 31 | 39.677 | F | 0.500 | 0.012  |
| SNC6 | 2007 | 182 | 4 | 31 | 35.463 | F | 0.500 | -0.806 |
| SNE5 | 2007 | 182 | 4 | 31 | 27.776 | F | 0.500 | -0.841 |
| SNB3 | 2007 | 182 | 4 | 31 | 36.557 | F | 0.500 | 0.760  |
| SNC7 | 2007 | 182 | 4 | 31 | 34.192 | F | 0.500 | -0.936 |
| S09A | 2007 | 182 | 4 | 32 | 10.048 | F | 0.500 | 0.460  |
| SNE4 | 2007 | 182 | 4 | 31 | 27.971 | F | 0.500 | 0.060  |
| SNC5 | 2007 | 182 | 4 | 31 | 33.972 | F | 0.500 | -0.114 |
| SND4 | 2007 | 182 | 4 | 31 | 31.252 | F | 0.500 | 0.294  |
| GSC  | 2007 | 182 | 4 | 32 | 29.305 | F | 0.500 | -1.167 |

|      |      |     |    |         |          |           |          |        |
|------|------|-----|----|---------|----------|-----------|----------|--------|
| 2007 | 193  | 5   | 23 | 52.1192 | -7.93300 | -74.37900 | 152.1000 |        |
| SN93 | 2007 | 193 | 5  | 42      | 19.845   | F         | 0.500    | -0.168 |

|      |      |     |   |    |        |   |       |        |
|------|------|-----|---|----|--------|---|-------|--------|
| M09A | 2007 | 193 | 5 | 42 | 21.167 | F | 0.500 | -0.589 |
| I08A | 2007 | 193 | 5 | 42 | 47.120 | F | 0.500 | -2.128 |
| J10A | 2007 | 193 | 5 | 42 | 32.334 | F | 0.500 | -0.857 |
| I06A | 2007 | 193 | 5 | 43 | 0.472  | F | 0.500 | -0.218 |
| ELFS | 2007 | 193 | 5 | 42 | 40.087 | F | 0.500 | 0.504  |
| M04C | 2007 | 193 | 5 | 42 | 55.385 | F | 0.500 | -0.776 |
| GASB | 2007 | 193 | 5 | 42 | 49.283 | F | 0.500 | 1.776  |
| V05C | 2007 | 193 | 5 | 41 | 58.050 | F | 0.500 | 0.527  |
| WDC  | 2007 | 193 | 5 | 42 | 48.825 | F | 0.500 | -3.737 |
| P01C | 2007 | 193 | 5 | 42 | 53.252 | F | 0.500 | 2.283  |
| SN87 | 2007 | 193 | 5 | 42 | 17.703 | F | 0.500 | 0.731  |
| PHL  | 2007 | 193 | 5 | 41 | 58.805 | F | 0.500 | -0.720 |
| RRX  | 2007 | 193 | 5 | 41 | 25.528 | F | 0.500 | -0.189 |
| Q09A | 2007 | 193 | 5 | 41 | 59.871 | F | 0.500 | 0.765  |
| L08A | 2007 | 193 | 5 | 42 | 32.298 | F | 0.500 | -1.976 |
| O10A | 2007 | 193 | 5 | 42 | 5.324  | F | 0.500 | -0.567 |
| K09A | 2007 | 193 | 5 | 42 | 32.547 | F | 0.500 | -1.317 |
| Q04C | 2007 | 193 | 5 | 42 | 31.371 | F | 0.500 | 0.280  |
| DEC  | 2007 | 193 | 5 | 41 | 32.194 | F | 0.500 | 0.123  |
| K11A | 2007 | 193 | 5 | 42 | 22.975 | F | 0.500 | -0.016 |
| U10A | 2007 | 193 | 5 | 41 | 33.464 | F | 0.500 | 0.811  |
| O04C | 2007 | 193 | 5 | 42 | 40.186 | F | 0.500 | 0.244  |
| BDM  | 2007 | 193 | 5 | 42 | 29.493 | F | 0.500 | 0.874  |
| HEC  | 2007 | 193 | 5 | 41 | 20.213 | F | 0.500 | 0.364  |
| TIN  | 2007 | 193 | 5 | 41 | 53.539 | F | 0.500 | 0.598  |
| SN97 | 2007 | 193 | 5 | 42 | 19.768 | F | 0.500 | 0.606  |
| SN98 | 2007 | 193 | 5 | 42 | 17.615 | F | 0.500 | 0.687  |
| DJJ  | 2007 | 193 | 5 | 41 | 32.143 | F | 0.500 | 0.096  |
| K10A | 2007 | 193 | 5 | 42 | 28.330 | F | 0.500 | -0.504 |
| L07A | 2007 | 193 | 5 | 42 | 38.480 | F | 0.500 | -1.495 |
| SNA7 | 2007 | 193 | 5 | 42 | 22.063 | F | 0.500 | 0.619  |
| N07B | 2007 | 193 | 5 | 42 | 27.052 | F | 0.500 | -0.644 |
| L10A | 2007 | 193 | 5 | 42 | 19.915 | F | 0.500 | -0.396 |
| SLA  | 2007 | 193 | 5 | 41 | 36.268 | F | 0.500 | 0.083  |
| P09A | 2007 | 193 | 5 | 42 | 3.931  | F | 0.500 | -0.625 |
| PLM  | 2007 | 193 | 5 | 41 | 13.440 | F | 0.500 | 0.706  |
| FUR  | 2007 | 193 | 5 | 41 | 37.811 | F | 0.500 | 0.680  |
| SVD  | 2007 | 193 | 5 | 41 | 21.298 | F | 0.500 | 0.942  |
| SUTB | 2007 | 193 | 5 | 42 | 36.615 | F | 0.500 | -0.465 |
| R06C | 2007 | 193 | 5 | 42 | 15.299 | F | 0.500 | 1.143  |
| N08A | 2007 | 193 | 5 | 42 | 21.295 | F | 0.500 | -0.377 |
| SNG7 | 2007 | 193 | 5 | 42 | 39.228 | F | 0.500 | 0.261  |
| PASC | 2007 | 193 | 5 | 41 | 30.244 | F | 0.500 | 0.016  |
| GRA  | 2007 | 193 | 5 | 41 | 46.731 | F | 0.500 | 1.100  |
| SNF8 | 2007 | 193 | 5 | 42 | 34.966 | F | 0.500 | 0.419  |
| SNA4 | 2007 | 193 | 5 | 42 | 22.098 | F | 0.500 | -0.179 |
| SND9 | 2007 | 193 | 5 | 42 | 29.084 | F | 0.500 | 0.821  |
| VTV  | 2007 | 193 | 5 | 41 | 25.452 | F | 0.500 | -0.637 |
| EDW2 | 2007 | 193 | 5 | 41 | 32.649 | F | 0.500 | -1.526 |
| VCS  | 2007 | 193 | 5 | 41 | 31.545 | F | 0.500 | -0.619 |
| SNC6 | 2007 | 193 | 5 | 42 | 26.337 | F | 0.500 | 0.075  |
| S04C | 2007 | 193 | 5 | 42 | 21.821 | F | 0.500 | 0.862  |
| O05C | 2007 | 193 | 5 | 42 | 36.475 | F | 0.500 | 0.564  |
| CMB  | 2007 | 193 | 5 | 42 | 17.304 | F | 0.500 | -0.323 |
| N09A | 2007 | 193 | 5 | 42 | 16.677 | F | 0.500 | -1.106 |
| YO05 | 2007 | 193 | 5 | 42 | 10.398 | F | 0.500 | -0.552 |
| SN96 | 2007 | 193 | 5 | 42 | 18.618 | F | 0.500 | 0.135  |
| SHO  | 2007 | 193 | 5 | 41 | 28.223 | F | 0.500 | 0.424  |
| BBR  | 2007 | 193 | 5 | 41 | 21.340 | F | 0.500 | 0.919  |
| SNG5 | 2007 | 193 | 5 | 42 | 38.842 | F | 0.500 | 0.047  |
| YO07 | 2007 | 193 | 5 | 42 | 9.589  | F | 0.500 | -0.463 |
| SN63 | 2007 | 193 | 5 | 42 | 10.034 | F | 0.500 | -0.926 |
| Q10A | 2007 | 193 | 5 | 41 | 54.015 | F | 0.500 | 0.934  |

|      |      |     |   |    |        |   |       |        |
|------|------|-----|---|----|--------|---|-------|--------|
| DGR  | 2007 | 193 | 5 | 41 | 16.850 | F | 0.500 | 0.693  |
| MPM  | 2007 | 193 | 5 | 41 | 39.671 | F | 0.500 | 0.245  |
| GSC  | 2007 | 193 | 5 | 41 | 28.184 | F | 0.500 | 0.574  |
| YO02 | 2007 | 193 | 5 | 42 | 10.288 | F | 0.500 | -0.804 |
| YO08 | 2007 | 193 | 5 | 42 | 9.420  | F | 0.500 | -0.204 |
| SNC5 | 2007 | 193 | 5 | 42 | 27.497 | F | 0.500 | -0.403 |
| SNB9 | 2007 | 193 | 5 | 42 | 22.381 | F | 0.500 | 0.620  |
| YO01 | 2007 | 193 | 5 | 42 | 10.221 | F | 0.500 | -0.725 |
| WCN  | 2007 | 193 | 5 | 42 | 23.125 | F | 0.500 | 0.679  |
| SNE5 | 2007 | 193 | 5 | 42 | 33.112 | F | 0.500 | -0.419 |
| SND4 | 2007 | 193 | 5 | 42 | 30.723 | F | 0.500 | -0.206 |
| YO04 | 2007 | 193 | 5 | 42 | 10.418 | F | 0.500 | -0.503 |
| BFS  | 2007 | 193 | 5 | 41 | 26.794 | F | 0.500 | 0.331  |
| R05C | 2007 | 193 | 5 | 42 | 20.743 | F | 0.500 | 0.109  |
| YO03 | 2007 | 193 | 5 | 42 | 10.257 | F | 0.500 | -0.710 |
| SN55 | 2007 | 193 | 5 | 42 | 8.853  | F | 0.500 | 0.265  |
| SNC7 | 2007 | 193 | 5 | 42 | 27.591 | F | 0.500 | 0.106  |
| YO09 | 2007 | 193 | 5 | 42 | 9.233  | F | 0.500 | -0.184 |
| SN64 | 2007 | 193 | 5 | 42 | 10.462 | F | 0.500 | -0.374 |
| YO06 | 2007 | 193 | 5 | 42 | 10.249 | F | 0.500 | -0.311 |
| SNE7 | 2007 | 193 | 5 | 42 | 33.967 | F | 0.500 | 0.460  |
| LAVA | 2007 | 193 | 5 | 42 | 25.561 | F | 0.500 | -0.104 |
| SNE6 | 2007 | 193 | 5 | 42 | 32.096 | F | 0.500 | 0.140  |
| R04C | 2007 | 193 | 5 | 42 | 23.721 | F | 0.500 | 0.389  |
| LRL  | 2007 | 193 | 5 | 41 | 36.205 | F | 0.500 | -0.079 |
| SND5 | 2007 | 193 | 5 | 42 | 30.145 | F | 0.500 | -0.151 |
| SNE4 | 2007 | 193 | 5 | 42 | 33.142 | F | 0.500 | -0.613 |
| YO11 | 2007 | 193 | 5 | 42 | 9.117  | F | 0.500 | -0.009 |
| ORV  | 2007 | 193 | 5 | 42 | 37.590 | F | 0.500 | 0.530  |
| YO10 | 2007 | 193 | 5 | 42 | 8.758  | F | 0.500 | -0.465 |
| SND8 | 2007 | 193 | 5 | 42 | 29.324 | F | 0.500 | 0.775  |
| HELL | 2007 | 193 | 5 | 41 | 55.639 | F | 0.500 | -0.818 |
| SNE9 | 2007 | 193 | 5 | 42 | 31.724 | F | 0.500 | 0.572  |
| SNA3 | 2007 | 193 | 5 | 42 | 22.617 | F | 0.500 | -0.058 |
| SND7 | 2007 | 193 | 5 | 42 | 31.588 | F | 0.500 | 0.447  |
| P05C | 2007 | 193 | 5 | 42 | 29.177 | F | 0.500 | 0.333  |
| S08C | 2007 | 193 | 5 | 41 | 57.278 | F | 0.500 | 0.794  |
| S09A | 2007 | 193 | 5 | 41 | 51.177 | F | 0.500 | 0.791  |
| SNF6 | 2007 | 193 | 5 | 42 | 35.265 | F | 0.500 | -0.164 |
| BEK  | 2007 | 193 | 5 | 42 | 31.720 | F | 0.500 | 0.600  |
| SNB3 | 2007 | 193 | 5 | 42 | 25.993 | F | 0.500 | -0.073 |

|      |      |     |    |        |          |           |          |        |       |
|------|------|-----|----|--------|----------|-----------|----------|--------|-------|
| 2007 | 202  | 13  | 27 | 6.0390 | -8.13300 | -71.27200 | 644.9000 | 55     | 1.629 |
| SN93 | 2007 | 202 | 13 | 44     | 39.093   | F         | 0.500    | 0.298  |       |
| M07A | 2007 | 202 | 13 | 44     | 48.666   | F         | 0.500    | -1.649 |       |
| MLAC | 2007 | 202 | 13 | 44     | 22.380   | F         | 0.500    | 0.408  |       |
| MPP  | 2007 | 202 | 13 | 44     | 11.308   | F         | 0.500    | 0.084  |       |
| OSI  | 2007 | 202 | 13 | 43     | 59.338   | F         | 0.500    | -0.812 |       |
| U05C | 2007 | 202 | 13 | 44     | 22.252   | F         | 0.500    | -0.715 |       |
| ARV  | 2007 | 202 | 13 | 44     | 4.229    | F         | 0.500    | -0.061 |       |
| TPH  | 2007 | 202 | 13 | 44     | 13.305   | F         | 0.500    | 0.745  |       |
| CVS  | 2007 | 202 | 13 | 44     | 55.862   | F         | 0.500    | 1.435  |       |
| R10A | 2007 | 202 | 13 | 44     | 8.479    | F         | 0.500    | 1.397  |       |
| M02C | 2007 | 202 | 13 | 45     | 13.659   | F         | 0.500    | -3.073 |       |
| N07B | 2007 | 202 | 13 | 44     | 43.638   | F         | 0.500    | -0.991 |       |
| I08A | 2007 | 202 | 13 | 45     | 2.353    | F         | 0.500    | -1.358 |       |
| RRX  | 2007 | 202 | 13 | 43     | 47.809   | F         | 0.500    | 0.085  |       |
| O10A | 2007 | 202 | 13 | 44     | 22.834   | F         | 0.500    | -0.628 |       |
| P06A | 2007 | 202 | 13 | 44     | 44.729   | F         | 0.500    | 0.746  |       |
| J04A | 2007 | 202 | 13 | 45     | 22.589   | F         | 0.500    | -0.672 |       |
| ISA  | 2007 | 202 | 13 | 44     | 5.029    | F         | 0.500    | -0.363 |       |
| VCS  | 2007 | 202 | 13 | 43     | 53.866   | F         | 0.500    | -0.431 |       |
| CHF  | 2007 | 202 | 13 | 43     | 52.957   | F         | 0.500    | 0.462  |       |

|      |      |     |    |    |        |   |       |        |
|------|------|-----|----|----|--------|---|-------|--------|
| U10A | 2007 | 202 | 13 | 43 | 54.051 | F | 0.500 | 0.584  |
| MNRC | 2007 | 202 | 13 | 44 | 59.266 | F | 0.500 | 1.672  |
| MUR  | 2007 | 202 | 13 | 43 | 40.651 | F | 0.500 | 0.305  |
| FMP  | 2007 | 202 | 13 | 43 | 51.647 | F | 0.500 | 1.306  |
| HUMO | 2007 | 202 | 13 | 45 | 21.972 | F | 0.500 | -2.926 |
| TPNV | 2007 | 202 | 13 | 43 | 57.487 | F | 0.500 | 0.692  |
| BBR  | 2007 | 202 | 13 | 43 | 44.031 | F | 0.500 | 1.120  |
| DBO  | 2007 | 202 | 13 | 45 | 28.687 | F | 0.500 | -1.366 |
| PACP | 2007 | 202 | 13 | 44 | 36.759 | F | 0.500 | -0.083 |
| SN98 | 2007 | 202 | 13 | 44 | 35.431 | F | 0.500 | 0.127  |
| GRA  | 2007 | 202 | 13 | 44 | 7.113  | F | 0.500 | 1.288  |
| V04C | 2007 | 202 | 13 | 44 | 25.700 | F | 0.500 | 1.016  |
| I04A | 2007 | 202 | 13 | 45 | 26.265 | F | 0.500 | -2.276 |
| PASC | 2007 | 202 | 13 | 43 | 53.357 | F | 0.500 | 0.748  |
| VES  | 2007 | 202 | 13 | 44 | 11.537 | F | 0.500 | 0.258  |
| SVD  | 2007 | 202 | 13 | 43 | 43.740 | F | 0.500 | 0.792  |
| J03A | 2007 | 202 | 13 | 45 | 27.318 | F | 0.500 | -2.286 |
| PLM  | 2007 | 202 | 13 | 43 | 36.639 | F | 0.500 | 0.648  |
| LGU  | 2007 | 202 | 13 | 44 | 0.043  | F | 0.500 | 0.580  |
| ELFS | 2007 | 202 | 13 | 44 | 57.245 | F | 0.500 | 0.798  |
| SN87 | 2007 | 202 | 13 | 44 | 36.481 | F | 0.500 | 0.966  |
| O09A | 2007 | 202 | 13 | 44 | 26.581 | F | 0.500 | -0.889 |
| N02C | 2007 | 202 | 13 | 45 | 14.748 | F | 0.500 | -1.710 |
| VTV  | 2007 | 202 | 13 | 43 | 47.842 | F | 0.500 | -0.447 |
| SND9 | 2007 | 202 | 13 | 44 | 46.852 | F | 0.500 | 1.023  |
| N09A | 2007 | 202 | 13 | 44 | 33.246 | F | 0.500 | -1.552 |
| O08A | 2007 | 202 | 13 | 44 | 34.659 | F | 0.500 | -0.881 |
| I03A | 2007 | 202 | 13 | 45 | 34.286 | F | 0.500 | -1.253 |
| LRL  | 2007 | 202 | 13 | 43 | 57.642 | F | 0.500 | -0.027 |
| MWC  | 2007 | 202 | 13 | 43 | 52.662 | F | 0.500 | 0.613  |
| SNB7 | 2007 | 202 | 13 | 44 | 42.391 | F | 0.500 | 0.565  |
| SNC3 | 2007 | 202 | 13 | 44 | 47.072 | F | 0.500 | 0.058  |
| I09A | 2007 | 202 | 13 | 44 | 57.924 | F | 0.500 | -0.790 |
| SN97 | 2007 | 202 | 13 | 44 | 38.118 | F | 0.500 | 0.560  |
| J06A | 2007 | 202 | 13 | 45 | 9.118  | F | 0.500 | -0.698 |
| L02A | 2007 | 202 | 13 | 45 | 25.666 | F | 0.500 | -0.965 |
| FUR  | 2007 | 202 | 13 | 43 | 58.346 | F | 0.500 | 0.530  |
| K09A | 2007 | 202 | 13 | 44 | 49.862 | F | 0.500 | 0.499  |
| M05C | 2007 | 202 | 13 | 45 | 3.680  | F | 0.500 | -0.471 |
| HEC  | 2007 | 202 | 13 | 43 | 42.022 | F | 0.500 | 0.065  |
| DGR  | 2007 | 202 | 13 | 43 | 39.688 | F | 0.500 | 0.529  |
| S08C | 2007 | 202 | 13 | 44 | 17.448 | F | 0.500 | 1.290  |
| SNG7 | 2007 | 202 | 13 | 44 | 56.663 | F | 0.500 | 0.518  |
| I06A | 2007 | 202 | 13 | 45 | 15.386 | F | 0.500 | 0.391  |
| WDC  | 2007 | 202 | 13 | 45 | 4.971  | F | 0.500 | -4.210 |
| SNF8 | 2007 | 202 | 13 | 44 | 52.553 | F | 0.500 | 0.669  |
| SNA7 | 2007 | 202 | 13 | 44 | 40.093 | F | 0.500 | 0.402  |
| GSC  | 2007 | 202 | 13 | 43 | 49.681 | F | 0.500 | 0.387  |
| WCN  | 2007 | 202 | 13 | 44 | 41.234 | F | 0.500 | 0.770  |
| SHO  | 2007 | 202 | 13 | 43 | 49.392 | F | 0.500 | 0.359  |
| SUTB | 2007 | 202 | 13 | 44 | 55.336 | F | 0.500 | 0.475  |
| SNF9 | 2007 | 202 | 13 | 44 | 51.701 | F | 0.500 | 0.628  |
| SNE9 | 2007 | 202 | 13 | 44 | 49.512 | F | 0.500 | 0.966  |
| HELL | 2007 | 202 | 13 | 44 | 15.648 | F | 0.500 | -1.021 |
| K11A | 2007 | 202 | 13 | 44 | 40.078 | F | 0.500 | 1.533  |
| J02A | 2007 | 202 | 13 | 45 | 33.399 | F | 0.500 | -0.248 |
| S10A | 2007 | 202 | 13 | 44 | 6.832  | F | 0.500 | 0.169  |
| S09A | 2007 | 202 | 13 | 44 | 10.578 | F | 0.500 | 0.579  |
| SN55 | 2007 | 202 | 13 | 44 | 28.058 | F | 0.500 | 0.265  |
| SND8 | 2007 | 202 | 13 | 44 | 46.902 | F | 0.500 | 0.680  |
| SNG5 | 2007 | 202 | 13 | 44 | 56.727 | F | 0.500 | 0.507  |
| SND4 | 2007 | 202 | 13 | 44 | 48.492 | F | 0.500 | -0.442 |
| N06A | 2007 | 202 | 13 | 44 | 50.571 | F | 0.500 | 0.026  |

|      |      |     |    |    |        |   |       |        |
|------|------|-----|----|----|--------|---|-------|--------|
| SNC6 | 2007 | 202 | 13 | 44 | 44.279 | F | 0.500 | -0.049 |
| SNB3 | 2007 | 202 | 13 | 44 | 44.659 | F | 0.500 | 0.161  |
| SNE7 | 2007 | 202 | 13 | 44 | 51.606 | F | 0.500 | 0.596  |
| SNC5 | 2007 | 202 | 13 | 44 | 45.737 | F | 0.500 | -0.261 |
| R09A | 2007 | 202 | 13 | 44 | 13.313 | F | 0.500 | 0.639  |
| LAVA | 2007 | 202 | 13 | 44 | 43.773 | F | 0.500 | -0.201 |
| SNB9 | 2007 | 202 | 13 | 44 | 40.273 | F | 0.500 | 0.505  |
| YO11 | 2007 | 202 | 13 | 44 | 28.561 | F | 0.500 | 0.231  |
| SNC7 | 2007 | 202 | 13 | 44 | 45.609 | F | 0.500 | 0.208  |
| YO10 | 2007 | 202 | 13 | 44 | 28.468 | F | 0.500 | 0.045  |
| SND5 | 2007 | 202 | 13 | 44 | 47.978 | F | 0.500 | -0.240 |
| SNA3 | 2007 | 202 | 13 | 44 | 41.568 | F | 0.500 | 0.296  |
| SNA4 | 2007 | 202 | 13 | 44 | 40.783 | F | 0.500 | -0.023 |
| YO09 | 2007 | 202 | 13 | 44 | 28.515 | F | 0.500 | -0.118 |
| YO05 | 2007 | 202 | 13 | 44 | 29.833 | F | 0.500 | -0.280 |
| L10A | 2007 | 202 | 13 | 44 | 36.962 | F | 0.500 | 0.550  |
| SNF6 | 2007 | 202 | 13 | 44 | 53.044 | F | 0.500 | 0.071  |
| SN63 | 2007 | 202 | 13 | 44 | 29.451 | F | 0.500 | -0.738 |
| YO08 | 2007 | 202 | 13 | 44 | 28.752 | F | 0.500 | -0.098 |
| SND7 | 2007 | 202 | 13 | 44 | 49.236 | F | 0.500 | 0.452  |
| SN96 | 2007 | 202 | 13 | 44 | 37.448 | F | 0.500 | 0.327  |
| SNE4 | 2007 | 202 | 13 | 44 | 51.528 | F | 0.500 | -0.078 |
| YO01 | 2007 | 202 | 13 | 44 | 29.612 | F | 0.500 | -0.553 |
| YO07 | 2007 | 202 | 13 | 44 | 28.968 | F | 0.500 | -0.306 |
| YO06 | 2007 | 202 | 13 | 44 | 29.586 | F | 0.500 | -0.144 |
| SNE5 | 2007 | 202 | 13 | 44 | 51.062 | F | 0.500 | -0.205 |
| BEK  | 2007 | 202 | 13 | 44 | 49.509 | F | 0.500 | 0.917  |
| SNE6 | 2007 | 202 | 13 | 44 | 50.170 | F | 0.500 | 0.488  |
| ORV  | 2007 | 202 | 13 | 44 | 55.456 | F | 0.500 | 0.843  |
| S06C | 2007 | 202 | 13 | 44 | 31.003 | F | 0.500 | -0.466 |
| SN64 | 2007 | 202 | 13 | 44 | 29.933 | F | 0.500 | -0.042 |
| CMB  | 2007 | 202 | 13 | 44 | 36.228 | F | 0.500 | -0.323 |
| YO04 | 2007 | 202 | 13 | 44 | 29.915 | F | 0.500 | -0.193 |
| R05C | 2007 | 202 | 13 | 44 | 39.288 | F | 0.500 | 0.194  |
| YO02 | 2007 | 202 | 13 | 44 | 29.716 | F | 0.500 | -0.614 |
| YO03 | 2007 | 202 | 13 | 44 | 29.726 | F | 0.500 | -0.462 |
| K10A | 2007 | 202 | 13 | 44 | 45.282 | F | 0.500 | 0.942  |
| HATC | 2007 | 202 | 13 | 45 | 2.517  | F | 0.500 | -0.389 |

|      |      |     |    |         |          |           |         |        |       |
|------|------|-----|----|---------|----------|-----------|---------|--------|-------|
| 2007 | 210  | 4   | 54 | 37.9789 | 53.64100 | 169.70200 | 25.7000 | 57     | 1.269 |
| WDC  | 2007 | 210 | 5  | 9       | 45.638   | F         | 0.500   | 0.611  |       |
| SNB3 | 2007 | 210 | 5  | 10      | 17.784   | F         | 0.500   | 0.905  |       |
| SN93 | 2007 | 210 | 5  | 10      | 24.730   | F         | 0.500   | 0.881  |       |
| YBH  | 2007 | 210 | 5  | 9       | 34.487   | F         | 0.500   | 1.313  |       |
| VCS  | 2007 | 210 | 5  | 11      | 19.398   | F         | 0.500   | 0.129  |       |
| SN55 | 2007 | 210 | 5  | 10      | 37.988   | F         | 0.500   | 0.457  |       |
| YO09 | 2007 | 210 | 5  | 10      | 37.032   | F         | 0.500   | 0.195  |       |
| SNF6 | 2007 | 210 | 5  | 10      | 4.868    | F         | 0.500   | -0.913 |       |
| LAVA | 2007 | 210 | 5  | 10      | 17.323   | F         | 0.500   | 0.071  |       |
| SN96 | 2007 | 210 | 5  | 10      | 26.125   | F         | 0.500   | 0.141  |       |
| Q08A | 2007 | 210 | 5  | 10      | 38.893   | F         | 0.500   | -0.415 |       |
| SNA3 | 2007 | 210 | 5  | 10      | 21.547   | F         | 0.500   | 0.637  |       |
| SNB9 | 2007 | 210 | 5  | 10      | 21.220   | F         | 0.500   | 0.000  |       |
| WCN  | 2007 | 210 | 5  | 10      | 20.317   | F         | 0.500   | -0.136 |       |
| SNE5 | 2007 | 210 | 5  | 10      | 6.978    | F         | 0.500   | -0.948 |       |
| SNG5 | 2007 | 210 | 5  | 10      | 0.878    | F         | 0.500   | -0.692 |       |
| CMB  | 2007 | 210 | 5  | 10      | 27.533   | F         | 0.500   | 0.632  |       |
| YO11 | 2007 | 210 | 5  | 10      | 37.053   | F         | 0.500   | 0.231  |       |
| SND4 | 2007 | 210 | 5  | 10      | 10.826   | F         | 0.500   | -0.131 |       |
| SNE6 | 2007 | 210 | 5  | 10      | 8.645    | F         | 0.500   | -1.104 |       |
| S09A | 2007 | 210 | 5  | 10      | 56.535   | F         | 0.500   | 0.709  |       |
| YO07 | 2007 | 210 | 5  | 10      | 36.252   | F         | 0.500   | 0.174  |       |
| YO08 | 2007 | 210 | 5  | 10      | 36.600   | F         | 0.500   | 0.122  |       |

|      |      |     |   |    |        |   |       |        |
|------|------|-----|---|----|--------|---|-------|--------|
| YO01 | 2007 | 210 | 5 | 10 | 34.845 | F | 0.500 | -0.055 |
| SND5 | 2007 | 210 | 5 | 10 | 10.912 | F | 0.500 | -0.645 |
| SNE4 | 2007 | 210 | 5 | 10 | 6.996  | F | 0.500 | -0.417 |
| YO02 | 2007 | 210 | 5 | 10 | 34.991 | F | 0.500 | 0.120  |
| YO04 | 2007 | 210 | 5 | 10 | 35.034 | F | 0.500 | 0.097  |
| YO06 | 2007 | 210 | 5 | 10 | 35.570 | F | 0.500 | 0.042  |
| YO05 | 2007 | 210 | 5 | 10 | 34.924 | F | 0.500 | -0.126 |
| SN64 | 2007 | 210 | 5 | 10 | 35.171 | F | 0.500 | 0.077  |
| YO03 | 2007 | 210 | 5 | 10 | 35.149 | F | 0.500 | 0.242  |
| MWC  | 2007 | 210 | 5 | 11 | 22.128 | F | 0.500 | -0.386 |
| GRA  | 2007 | 210 | 5 | 11 | 2.212  | F | 0.500 | 1.041  |
| ELFS | 2007 | 210 | 5 | 10 | 0.622  | F | 0.500 | 0.610  |
| SND9 | 2007 | 210 | 5 | 10 | 12.992 | F | 0.500 | -0.511 |
| K06A | 2007 | 210 | 5 | 9  | 44.160 | F | 0.500 | 0.190  |
| CIA  | 2007 | 210 | 5 | 11 | 26.468 | F | 0.500 | -0.766 |
| L02A | 2007 | 210 | 5 | 9  | 23.109 | F | 0.500 | 1.393  |
| I03A | 2007 | 210 | 5 | 9  | 8.642  | F | 0.500 | 0.621  |
| TIN  | 2007 | 210 | 5 | 10 | 54.984 | F | 0.500 | 0.984  |
| Q09A | 2007 | 210 | 5 | 10 | 45.460 | F | 0.500 | -0.097 |
| PASC | 2007 | 210 | 5 | 11 | 20.719 | F | 0.500 | -0.830 |
| SHO  | 2007 | 210 | 5 | 11 | 20.476 | F | 0.500 | 0.097  |
| GSC  | 2007 | 210 | 5 | 11 | 21.185 | F | 0.500 | -0.676 |
| K02A | 2007 | 210 | 5 | 9  | 17.996 | F | 0.500 | 0.794  |
| M03C | 2007 | 210 | 5 | 9  | 42.541 | F | 0.500 | 0.158  |
| S04C | 2007 | 210 | 5 | 10 | 24.555 | F | 0.500 | 0.391  |
| DGR  | 2007 | 210 | 5 | 11 | 35.184 | F | 0.500 | -0.780 |
| L04A | 2007 | 210 | 5 | 9  | 36.339 | F | 0.500 | 0.324  |
| O02C | 2007 | 210 | 5 | 9  | 48.586 | F | 0.500 | 1.580  |
| J02A | 2007 | 210 | 5 | 9  | 12.188 | F | 0.500 | 1.137  |
| R04C | 2007 | 210 | 5 | 10 | 19.969 | F | 0.500 | -0.092 |
| BFS  | 2007 | 210 | 5 | 11 | 25.415 | F | 0.500 | 0.054  |
| N02C | 2007 | 210 | 5 | 9  | 38.113 | F | 0.500 | 1.608  |
| L09A | 2007 | 210 | 5 | 10 | 11.275 | F | 0.500 | -0.862 |
| S10A | 2007 | 210 | 5 | 10 | 58.928 | F | 0.500 | -0.059 |
| M02C | 2007 | 210 | 5 | 9  | 36.918 | F | 0.500 | 1.866  |
| J05A | 2007 | 210 | 5 | 9  | 32.190 | F | 0.500 | 0.729  |
| MUR  | 2007 | 210 | 5 | 11 | 34.692 | F | 0.500 | -0.255 |
| MPM  | 2007 | 210 | 5 | 11 | 9.370  | F | 0.500 | -0.085 |
| SNF9 | 2007 | 210 | 5 | 10 | 6.156  | F | 0.500 | -0.713 |
| O04C | 2007 | 210 | 5 | 10 | 0.301  | F | 0.500 | 0.374  |
| SNF8 | 2007 | 210 | 5 | 10 | 5.737  | F | 0.500 | -0.904 |
| PLM  | 2007 | 210 | 5 | 11 | 40.294 | F | 0.500 | -0.016 |
| HUMO | 2007 | 210 | 5 | 9  | 23.697 | F | 0.500 | 0.657  |
| TPNV | 2007 | 210 | 5 | 11 | 11.346 | F | 0.500 | 0.433  |
| SNG7 | 2007 | 210 | 5 | 10 | 1.252  | F | 0.500 | 0.047  |
| I04A | 2007 | 210 | 5 | 9  | 16.346 | F | 0.500 | -0.709 |
| LRL  | 2007 | 210 | 5 | 11 | 12.362 | F | 0.500 | -0.971 |
| L10A | 2007 | 210 | 5 | 10 | 20.700 | F | 0.500 | -0.509 |
| O06A | 2007 | 210 | 5 | 10 | 10.713 | F | 0.500 | -1.025 |
| SNA7 | 2007 | 210 | 5 | 10 | 22.150 | F | 0.500 | 0.046  |
| T06C | 2007 | 210 | 5 | 10 | 41.734 | F | 0.500 | -0.399 |
| SND8 | 2007 | 210 | 5 | 10 | 12.078 | F | 0.500 | -1.223 |
| K11A | 2007 | 210 | 5 | 10 | 17.638 | F | 0.500 | -0.493 |
| CWC  | 2007 | 210 | 5 | 11 | 1.143  | F | 0.500 | 0.037  |
| SNC6 | 2007 | 210 | 5 | 10 | 15.823 | F | 0.500 | -0.932 |
| SNA4 | 2007 | 210 | 5 | 10 | 21.393 | F | 0.500 | 0.036  |
| SNC7 | 2007 | 210 | 5 | 10 | 14.086 | F | 0.500 | -1.196 |
| L08A | 2007 | 210 | 5 | 10 | 4.053  | F | 0.500 | -0.978 |
| YO10 | 2007 | 210 | 5 | 10 | 36.900 | F | 0.500 | -0.005 |
| R09A | 2007 | 210 | 5 | 10 | 51.985 | F | 0.500 | -0.161 |
| SUTB | 2007 | 210 | 5 | 10 | 3.337  | F | 0.500 | -0.674 |
| SNC5 | 2007 | 210 | 5 | 10 | 14.189 | F | 0.500 | -0.311 |
| HELL | 2007 | 210 | 5 | 10 | 50.261 | F | 0.500 | -0.793 |

|      |      |     |    |         |          |            |         |        |         |
|------|------|-----|----|---------|----------|------------|---------|--------|---------|
| 2007 | 214  | 3   | 21 | 22.4329 | 51.30700 | -179.97099 | 21.0000 | 58     | -20.387 |
| N07B | 2007 | 214 | 3  | 35      | 35.946   | F          | 0.500   | -1.062 |         |
| MUR  | 2007 | 214 | 3  | 36      | 56.662   | F          | 0.500   | -0.834 |         |
| SN98 | 2007 | 214 | 3  | 35      | 49.377   | F          | 0.500   | 0.177  |         |
| SNF8 | 2007 | 214 | 3  | 35      | 28.049   | F          | 0.500   | -0.520 |         |
| ORV  | 2007 | 214 | 3  | 35      | 24.024   | F          | 0.500   | -0.192 |         |
| CHF  | 2007 | 214 | 3  | 36      | 43.368   | F          | 0.500   | -0.165 |         |
| MWC  | 2007 | 214 | 3  | 36      | 44.107   | F          | 0.500   | -0.290 |         |
| N02C | 2007 | 214 | 3  | 34      | 58.367   | F          | 0.500   | 1.868  |         |
| SND4 | 2007 | 214 | 3  | 35      | 32.128   | F          | 0.500   | 0.304  |         |
| SNC6 | 2007 | 214 | 3  | 35      | 37.912   | F          | 0.500   | -0.434 |         |
| SNC5 | 2007 | 214 | 3  | 35      | 35.775   | F          | 0.500   | -0.035 |         |
| SNB6 | 2007 | 214 | 3  | 35      | 41.811   | F          | 0.500   | -0.137 |         |
| HEC  | 2007 | 214 | 3  | 36      | 53.599   | F          | 0.500   | -0.227 |         |
| SNE6 | 2007 | 214 | 3  | 35      | 30.247   | F          | 0.500   | -0.924 |         |
| S09A | 2007 | 214 | 3  | 36      | 20.188   | F          | 0.500   | 0.397  |         |
| SND5 | 2007 | 214 | 3  | 35      | 32.473   | F          | 0.500   | -0.312 |         |
| N09A | 2007 | 214 | 3  | 35      | 47.972   | F          | 0.500   | -1.487 |         |
| M02C | 2007 | 214 | 3  | 34      | 57.836   | F          | 0.500   | 1.953  |         |
| SND8 | 2007 | 214 | 3  | 35      | 34.913   | F          | 0.500   | -0.545 |         |
| T06C | 2007 | 214 | 3  | 36      | 3.126    | F          | 0.500   | -0.282 |         |
| HELL | 2007 | 214 | 3  | 36      | 12.561   | F          | 0.500   | -0.314 |         |
| SNE5 | 2007 | 214 | 3  | 35      | 28.429   | F          | 0.500   | -0.560 |         |
| YO10 | 2007 | 214 | 3  | 35      | 58.622   | F          | 0.500   | -0.210 |         |
| SNB9 | 2007 | 214 | 3  | 35      | 43.832   | F          | 0.500   | 0.040  |         |
| SNE7 | 2007 | 214 | 3  | 35      | 28.995   | F          | 0.500   | -0.527 |         |
| WCN  | 2007 | 214 | 3  | 35      | 42.743   | F          | 0.500   | -0.103 |         |
| SNC7 | 2007 | 214 | 3  | 35      | 36.324   | F          | 0.500   | -0.766 |         |
| SND7 | 2007 | 214 | 3  | 35      | 31.829   | F          | 0.500   | -0.676 |         |
| M03C | 2007 | 214 | 3  | 35      | 4.504    | F          | 0.500   | 0.741  |         |
| SN97 | 2007 | 214 | 3  | 35      | 46.959   | F          | 0.500   | 0.195  |         |
| LRL  | 2007 | 214 | 3  | 36      | 35.225   | F          | 0.500   | -0.737 |         |
| SNF9 | 2007 | 214 | 3  | 35      | 28.751   | F          | 0.500   | -0.418 |         |
| SNA7 | 2007 | 214 | 3  | 35      | 44.380   | F          | 0.500   | 0.181  |         |
| N08A | 2007 | 214 | 3  | 35      | 43.301   | F          | 0.500   | -1.289 |         |
| YO11 | 2007 | 214 | 3  | 35      | 59.571   | F          | 0.500   | 0.779  |         |
| CWC  | 2007 | 214 | 3  | 36      | 23.982   | F          | 0.500   | 0.311  |         |
| YO09 | 2007 | 214 | 3  | 35      | 59.079   | F          | 0.500   | 0.405  |         |
| SN55 | 2007 | 214 | 3  | 36      | 0.373    | F          | 0.500   | 0.822  |         |
| SNE4 | 2007 | 214 | 3  | 35      | 28.392   | F          | 0.500   | 0.129  |         |
| SN96 | 2007 | 214 | 3  | 35      | 48.036   | F          | 0.500   | 0.397  |         |
| YO08 | 2007 | 214 | 3  | 35      | 58.650   | F          | 0.500   | 0.405  |         |
| O08A | 2007 | 214 | 3  | 35      | 47.598   | F          | 0.500   | -1.124 |         |
| YBH  | 2007 | 214 | 3  | 34      | 56.187   | F          | 0.500   | 1.788  |         |
| YO07 | 2007 | 214 | 3  | 35      | 58.272   | F          | 0.500   | 0.415  |         |
| YO05 | 2007 | 214 | 3  | 35      | 56.754   | F          | 0.500   | 0.052  |         |
| WDC  | 2007 | 214 | 3  | 35      | 6.988    | F          | 0.500   | 1.415  |         |
| YO06 | 2007 | 214 | 3  | 35      | 57.576   | F          | 0.500   | 0.284  |         |
| SN63 | 2007 | 214 | 3  | 35      | 56.539   | F          | 0.500   | -0.033 |         |
| YO02 | 2007 | 214 | 3  | 35      | 56.776   | F          | 0.500   | 0.322  |         |
| YO01 | 2007 | 214 | 3  | 35      | 56.646   | F          | 0.500   | 0.188  |         |
| SN64 | 2007 | 214 | 3  | 35      | 57.153   | F          | 0.500   | 0.328  |         |
| YO03 | 2007 | 214 | 3  | 35      | 56.915   | F          | 0.500   | 0.388  |         |
| YO04 | 2007 | 214 | 3  | 35      | 56.936   | F          | 0.500   | 0.370  |         |
| SNB5 | 2007 | 214 | 3  | 35      | 39.648   | F          | 0.500   | 0.052  |         |
| M08A | 2007 | 214 | 3  | 35      | 35.232   | F          | 0.500   | -1.480 |         |
| U10A | 2007 | 214 | 3  | 36      | 39.230   | F          | 0.500   | 0.093  |         |
| Q03C | 2007 | 214 | 3  | 35      | 30.573   | F          | 0.500   | 2.987  |         |
| Q07A | 2007 | 214 | 3  | 35      | 54.009   | F          | 0.500   | -0.411 |         |
| M10A | 2007 | 214 | 3  | 35      | 50.908   | F          | 0.500   | -1.674 |         |
| HATC | 2007 | 214 | 3  | 35      | 14.309   | F          | 0.500   | 0.522  |         |
| GRA  | 2007 | 214 | 3  | 36      | 25.853   | F          | 0.500   | 1.153  |         |

|      |      |     |   |    |        |   |       |        |
|------|------|-----|---|----|--------|---|-------|--------|
| J07A | 2007 | 214 | 3 | 35 | 12.167 | F | 0.500 | -0.023 |
| T05C | 2007 | 214 | 3 | 35 | 56.536 | F | 0.500 | 0.909  |
| VES  | 2007 | 214 | 3 | 36 | 18.369 | F | 0.500 | -1.334 |
| L05A | 2007 | 214 | 3 | 35 | 9.716  | F | 0.500 | 0.450  |
| ELFS | 2007 | 214 | 3 | 35 | 23.038 | F | 0.500 | 0.758  |
| SBC  | 2007 | 214 | 3 | 36 | 27.201 | F | 0.500 | 0.153  |
| U05C | 2007 | 214 | 3 | 36 | 6.801  | F | 0.500 | 1.117  |
| MNRC | 2007 | 214 | 3 | 35 | 24.635 | F | 0.500 | 3.001  |
| O01C | 2007 | 214 | 3 | 34 | 59.651 | F | 0.500 | 2.195  |
| SCZ2 | 2007 | 214 | 3 | 36 | 31.614 | F | 0.500 | -0.353 |
| MCCM | 2007 | 214 | 3 | 35 | 23.788 | F | 0.500 | -0.077 |
| SHO  | 2007 | 214 | 3 | 36 | 44.165 | F | 0.500 | -0.319 |
| V05C | 2007 | 214 | 3 | 36 | 13.302 | F | 0.500 | 1.323  |
| M09A | 2007 | 214 | 3 | 35 | 43.910 | F | 0.500 | -1.330 |
| JRSC | 2007 | 214 | 3 | 35 | 35.777 | F | 0.500 | -0.900 |
| FARB | 2007 | 214 | 3 | 35 | 25.876 | F | 0.500 | -0.888 |
| O10A | 2007 | 214 | 3 | 36 | 2.776  | F | 0.500 | -0.704 |
| SVD  | 2007 | 214 | 3 | 36 | 52.926 | F | 0.500 | -0.868 |
| J04A | 2007 | 214 | 3 | 34 | 47.838 | F | 0.500 | 0.029  |
| K05A | 2007 | 214 | 3 | 35 | 3.873  | F | 0.500 | 0.809  |
| GSC  | 2007 | 214 | 3 | 36 | 45.112 | F | 0.500 | -0.150 |
| BAK  | 2007 | 214 | 3 | 36 | 23.592 | F | 0.500 | -0.487 |
| CVS  | 2007 | 214 | 3 | 35 | 27.020 | F | 0.500 | 0.930  |
| I04A | 2007 | 214 | 3 | 34 | 39.633 | F | 0.500 | -0.611 |
| TPH  | 2007 | 214 | 3 | 36 | 15.510 | F | 0.500 | -1.207 |
| K11A | 2007 | 214 | 3 | 35 | 45.316 | F | 0.500 | -1.120 |
| PHL  | 2007 | 214 | 3 | 36 | 10.252 | F | 0.500 | -0.187 |
| WENL | 2007 | 214 | 3 | 35 | 39.709 | F | 0.500 | 0.576  |
| BDM  | 2007 | 214 | 3 | 35 | 36.254 | F | 0.500 | 1.178  |
| K08A | 2007 | 214 | 3 | 35 | 24.250 | F | 0.500 | -0.612 |
| SMM  | 2007 | 214 | 3 | 36 | 16.595 | F | 0.500 | 0.089  |
| BBR  | 2007 | 214 | 3 | 36 | 53.492 | F | 0.500 | -0.785 |
| TPNV | 2007 | 214 | 3 | 36 | 34.978 | F | 0.500 | -0.492 |
| SN93 | 2007 | 214 | 3 | 35 | 45.753 | F | 0.500 | 0.895  |
| HAST | 2007 | 214 | 3 | 35 | 51.897 | F | 0.500 | -0.455 |
| K09A | 2007 | 214 | 3 | 35 | 30.957 | F | 0.500 | -1.104 |
| CIA  | 2007 | 214 | 3 | 36 | 47.564 | F | 0.500 | -1.012 |
| L04A | 2007 | 214 | 3 | 34 | 58.786 | F | 0.500 | 0.460  |
| M04C | 2007 | 214 | 3 | 35 | 2.954  | F | 0.500 | 0.779  |
| K10A | 2007 | 214 | 3 | 35 | 37.953 | F | 0.500 | -1.193 |
| N06A | 2007 | 214 | 3 | 35 | 28.873 | F | 0.500 | -0.563 |
| MLAC | 2007 | 214 | 3 | 36 | 7.859  | F | 0.500 | 1.641  |
| RCT  | 2007 | 214 | 3 | 36 | 13.056 | F | 0.500 | -0.812 |
| I03A | 2007 | 214 | 3 | 34 | 31.102 | F | 0.500 | 0.569  |
| L09A | 2007 | 214 | 3 | 35 | 37.068 | F | 0.500 | -1.240 |
| U04C | 2007 | 214 | 3 | 36 | 0.139  | F | 0.500 | 0.462  |
| HOPS | 2007 | 214 | 3 | 35 | 16.945 | F | 0.500 | 2.250  |
| CMB  | 2007 | 214 | 3 | 35 | 48.953 | F | 0.500 | 0.912  |
| SNA3 | 2007 | 214 | 3 | 35 | 42.587 | F | 0.500 | 0.667  |
| L02A | 2007 | 214 | 3 | 34 | 43.911 | F | 0.500 | 1.533  |
| WVOR | 2007 | 214 | 3 | 35 | 25.011 | F | 0.500 | -0.953 |
| SND9 | 2007 | 214 | 3 | 35 | 35.584 | F | 0.500 | -0.331 |
| Q08A | 2007 | 214 | 3 | 36 | 2.549  | F | 0.500 | -0.607 |
| R09A | 2007 | 214 | 3 | 36 | 16.035 | F | 0.500 | -0.485 |
| TIN  | 2007 | 214 | 3 | 36 | 17.984 | F | 0.500 | 1.299  |
| N10A | 2007 | 214 | 3 | 35 | 58.364 | F | 0.500 | -1.303 |
| PASC | 2007 | 214 | 3 | 36 | 43.266 | F | 0.500 | -0.051 |
| K07A | 2007 | 214 | 3 | 35 | 17.853 | F | 0.500 | -0.512 |
| LAVA | 2007 | 214 | 3 | 35 | 38.576 | F | 0.500 | 0.157  |
| SNF6 | 2007 | 214 | 3 | 35 | 26.659 | F | 0.500 | -0.458 |
| PLM  | 2007 | 214 | 3 | 37 | 2.564  | F | 0.500 | -0.546 |
| L10A | 2007 | 214 | 3 | 35 | 47.172 | F | 0.500 | -1.351 |
| O09A | 2007 | 214 | 3 | 35 | 57.567 | F | 0.500 | -0.693 |



|      |      |     |   |    |        |   |       |        |
|------|------|-----|---|----|--------|---|-------|--------|
| SUTB | 2007 | 214 | 3 | 35 | 25.020 | F | 0.500 | 0.611  |
| S10A | 2007 | 214 | 3 | 36 | 23.126 | F | 0.500 | -0.526 |
| EDW2 | 2007 | 214 | 3 | 36 | 38.042 | F | 0.500 | -0.390 |
| SNB7 | 2007 | 214 | 3 | 35 | 41.128 | F | 0.500 | -0.390 |
| RRX  | 2007 | 214 | 3 | 36 | 47.365 | F | 0.500 | -0.003 |
| SNG7 | 2007 | 214 | 3 | 35 | 22.727 | F | 0.500 | 0.006  |
| I09A | 2007 | 214 | 3 | 35 | 21.080 | F | 0.500 | -0.282 |
| BFS  | 2007 | 214 | 3 | 36 | 47.520 | F | 0.500 | -0.108 |
| DGR  | 2007 | 214 | 3 | 36 | 58.040 | F | 0.500 | -0.650 |
| HUMO | 2007 | 214 | 3 | 34 | 45.304 | F | 0.500 | 0.651  |
| SNE9 | 2007 | 214 | 3 | 35 | 31.923 | F | 0.500 | -0.594 |
| M05C | 2007 | 214 | 3 | 35 | 12.713 | F | 0.500 | 0.608  |
| SNA4 | 2007 | 214 | 3 | 35 | 42.956 | F | 0.500 | 0.361  |
| VTV  | 2007 | 214 | 3 | 36 | 47.287 | F | 0.500 | -0.125 |
| SN87 | 2007 | 214 | 3 | 35 | 49.959 | F | 0.500 | 0.105  |

|      |      |     |    |         |          |            |        |        |       |
|------|------|-----|----|---------|----------|------------|--------|--------|-------|
| 2007 | 227  | 20  | 22 | 13.0801 | 50.32200 | -177.54800 | 9.0000 | 59     | 1.960 |
| R05C | 2007 | 227 | 20 | 36      | 18.046   | F          | 0.500  | -0.281 |       |
| SND4 | 2007 | 227 | 20 | 36      | 3.797    | F          | 0.500  | -0.770 |       |
| BBR  | 2007 | 227 | 20 | 37      | 24.912   | F          | 0.500  | -2.261 |       |
| SNE6 | 2007 | 227 | 20 | 36      | 2.289    | F          | 0.500  | -1.840 |       |
| SMM  | 2007 | 227 | 20 | 36      | 48.956   | F          | 0.500  | 0.259  |       |
| CHF  | 2007 | 227 | 20 | 37      | 15.423   | F          | 0.500  | -0.716 |       |
| S04C | 2007 | 227 | 20 | 36      | 16.767   | F          | 0.500  | 0.348  |       |
| HEC  | 2007 | 227 | 20 | 37      | 26.101   | F          | 0.500  | -0.913 |       |
| P09A | 2007 | 227 | 20 | 36      | 37.011   | F          | 0.500  | -1.357 |       |
| SNA3 | 2007 | 227 | 20 | 36      | 14.359   | F          | 0.500  | -0.262 |       |
| L04A | 2007 | 227 | 20 | 35      | 32.316   | F          | 0.500  | 0.412  |       |
| MPP  | 2007 | 227 | 20 | 36      | 55.344   | F          | 0.500  | 0.818  |       |
| S09A | 2007 | 227 | 20 | 36      | 52.918   | F          | 0.500  | -0.435 |       |
| SNC7 | 2007 | 227 | 20 | 36      | 9.601    | F          | 0.500  | -0.547 |       |
| SND5 | 2007 | 227 | 20 | 36      | 4.506    | F          | 0.500  | -1.141 |       |
| HELL | 2007 | 227 | 20 | 36      | 44.957   | F          | 0.500  | -0.702 |       |
| SNE7 | 2007 | 227 | 20 | 36      | 1.972    | F          | 0.500  | -0.648 |       |
| VTV  | 2007 | 227 | 20 | 37      | 19.291   | F          | 0.500  | -0.971 |       |
| GASB | 2007 | 227 | 20 | 35      | 47.637   | F          | 0.500  | 2.762  |       |
| PACP | 2007 | 227 | 20 | 36      | 21.516   | F          | 0.500  | 0.158  |       |
| P01C | 2007 | 227 | 20 | 35      | 42.182   | F          | 0.500  | 2.043  |       |
| SND8 | 2007 | 227 | 20 | 36      | 7.586    | F          | 0.500  | -1.080 |       |
| WCN  | 2007 | 227 | 20 | 36      | 16.053   | F          | 0.500  | -0.030 |       |
| CWC  | 2007 | 227 | 20 | 36      | 57.703   | F          | 0.500  | 1.042  |       |
| T06C | 2007 | 227 | 20 | 36      | 35.195   | F          | 0.500  | -0.843 |       |
| SN93 | 2007 | 227 | 20 | 36      | 17.145   | F          | 0.500  | -0.386 |       |
| R06C | 2007 | 227 | 20 | 36      | 26.113   | F          | 0.500  | 0.434  |       |
| SNB9 | 2007 | 227 | 20 | 36      | 16.956   | F          | 0.500  | -0.130 |       |
| WENL | 2007 | 227 | 20 | 36      | 12.124   | F          | 0.500  | 0.784  |       |
| FARB | 2007 | 227 | 20 | 35      | 56.496   | F          | 0.500  | -2.117 |       |
| SNF9 | 2007 | 227 | 20 | 36      | 1.036    | F          | 0.500  | -1.448 |       |
| YO01 | 2007 | 227 | 20 | 36      | 29.126   | F          | 0.500  | -0.148 |       |
| YO02 | 2007 | 227 | 20 | 36      | 29.219   | F          | 0.500  | -0.062 |       |
| SNA7 | 2007 | 227 | 20 | 36      | 17.864   | F          | 0.500  | 0.556  |       |
| U04C | 2007 | 227 | 20 | 36      | 32.442   | F          | 0.500  | 0.579  |       |
| SN63 | 2007 | 227 | 20 | 36      | 29.055   | F          | 0.500  | -0.306 |       |
| BDM  | 2007 | 227 | 20 | 36      | 8.523    | F          | 0.500  | 1.194  |       |
| SNG7 | 2007 | 227 | 20 | 35      | 55.114   | F          | 0.500  | -0.676 |       |
| SNE9 | 2007 | 227 | 20 | 36      | 4.470    | F          | 0.500  | -1.359 |       |
| HAST | 2007 | 227 | 20 | 36      | 23.428   | F          | 0.500  | -0.884 |       |
| L07A | 2007 | 227 | 20 | 35      | 56.369   | F          | 0.500  | -1.155 |       |
| YO03 | 2007 | 227 | 20 | 36      | 29.369   | F          | 0.500  | -0.002 |       |
| CVS  | 2007 | 227 | 20 | 35      | 58.869   | F          | 0.500  | 0.609  |       |
| N02C | 2007 | 227 | 20 | 35      | 31.018   | F          | 0.500  | 1.835  |       |
| R07C | 2007 | 227 | 20 | 36      | 34.708   | F          | 0.500  | 1.466  |       |
| SNC6 | 2007 | 227 | 20 | 36      | 10.851   | F          | 0.500  | -0.458 |       |

|      |      |     |    |    |        |   |       |        |
|------|------|-----|----|----|--------|---|-------|--------|
| SNC5 | 2007 | 227 | 20 | 36 | 8.363  | F | 0.500 | -0.329 |
| M02C | 2007 | 227 | 20 | 35 | 30.762 | F | 0.500 | 1.862  |
| YO10 | 2007 | 227 | 20 | 36 | 31.679 | F | 0.500 | -0.093 |
| SNB5 | 2007 | 227 | 20 | 36 | 12.243 | F | 0.500 | -0.230 |
| YO08 | 2007 | 227 | 20 | 36 | 31.114 | F | 0.500 | -0.020 |
| SNA4 | 2007 | 227 | 20 | 36 | 15.012 | F | 0.500 | -0.366 |
| SNB7 | 2007 | 227 | 20 | 36 | 14.048 | F | 0.500 | -0.517 |
| MNRC | 2007 | 227 | 20 | 35 | 56.687 | F | 0.500 | 2.724  |
| YO04 | 2007 | 227 | 20 | 36 | 29.305 | F | 0.500 | -0.103 |
| SN64 | 2007 | 227 | 20 | 36 | 29.652 | F | 0.500 | -0.058 |
| HUMO | 2007 | 227 | 20 | 35 | 18.745 | F | 0.500 | 0.681  |
| YO07 | 2007 | 227 | 20 | 36 | 30.778 | F | 0.500 | 0.033  |
| O02C | 2007 | 227 | 20 | 35 | 41.689 | F | 0.500 | 2.045  |
| YO09 | 2007 | 227 | 20 | 36 | 31.608 | F | 0.500 | 0.035  |
| YO11 | 2007 | 227 | 20 | 36 | 32.497 | F | 0.500 | 0.746  |
| YO05 | 2007 | 227 | 20 | 36 | 29.434 | F | 0.500 | -0.124 |
| YO06 | 2007 | 227 | 20 | 36 | 30.081 | F | 0.500 | -0.096 |
| HOPS | 2007 | 227 | 20 | 35 | 48.596 | F | 0.500 | 1.732  |
| MCCM | 2007 | 227 | 20 | 35 | 55.309 | F | 0.500 | -0.567 |
| CMB  | 2007 | 227 | 20 | 36 | 20.378 | F | 0.500 | -0.363 |
| SN97 | 2007 | 227 | 20 | 36 | 19.913 | F | 0.500 | 0.074  |
| SN96 | 2007 | 227 | 20 | 36 | 20.329 | F | 0.500 | -0.226 |
| WDC  | 2007 | 227 | 20 | 35 | 39.630 | F | 0.500 | 1.234  |
| YBH  | 2007 | 227 | 20 | 35 | 29.224 | F | 0.500 | 1.645  |
| SNE4 | 2007 | 227 | 20 | 35 | 59.916 | F | 0.500 | -1.094 |

|      |      |     |    |        |           |           |         |        |       |
|------|------|-----|----|--------|-----------|-----------|---------|--------|-------|
| 2007 | 228  | 5   | 17 | 0.3187 | -14.28200 | -76.12700 | 23.4000 | 60     | 4.169 |
| J02A | 2007 | 228 | 5  | 37     | 41.309    | F         | 0.500   | -0.370 |       |
| MOD  | 2007 | 228 | 5  | 37     | 11.642    | F         | 0.500   | 1.796  |       |
| L02A | 2007 | 228 | 5  | 37     | 31.303    | F         | 0.500   | -1.645 |       |
| K02A | 2007 | 228 | 5  | 37     | 35.377    | F         | 0.500   | -1.630 |       |
| WDC  | 2007 | 228 | 5  | 37     | 10.260    | F         | 0.500   | -3.638 |       |
| L05A | 2007 | 228 | 5  | 37     | 14.129    | F         | 0.500   | -0.426 |       |
| R08A | 2007 | 228 | 5  | 36     | 26.289    | F         | 0.500   | 0.471  |       |
| P10A | 2007 | 228 | 5  | 36     | 25.264    | F         | 0.500   | -0.565 |       |
| J04A | 2007 | 228 | 5  | 37     | 31.019    | F         | 0.500   | -0.961 |       |
| CWC  | 2007 | 228 | 5  | 36     | 10.901    | F         | 0.500   | 1.583  |       |
| L04A | 2007 | 228 | 5  | 37     | 21.121    | F         | 0.500   | -1.189 |       |
| SNB7 | 2007 | 228 | 5  | 36     | 46.060    | F         | 0.500   | 0.143  |       |
| ARV  | 2007 | 228 | 5  | 36     | 3.570     | F         | 0.500   | 0.318  |       |
| PIN  | 2007 | 228 | 5  | 37     | 29.075    | F         | 0.500   | 0.075  |       |
| U04C | 2007 | 228 | 5  | 36     | 28.583    | F         | 0.500   | 0.512  |       |
| PHL  | 2007 | 228 | 5  | 36     | 18.557    | F         | 0.500   | -0.153 |       |
| YO05 | 2007 | 228 | 5  | 36     | 32.472    | F         | 0.500   | -0.258 |       |
| SUTB | 2007 | 228 | 5  | 36     | 58.016    | F         | 0.500   | -0.068 |       |
| P01C | 2007 | 228 | 5  | 37     | 12.632    | F         | 0.500   | 1.712  |       |
| Q09A | 2007 | 228 | 5  | 36     | 23.809    | F         | 0.500   | 0.058  |       |
| PKD  | 2007 | 228 | 5  | 36     | 23.814    | F         | 0.500   | 0.790  |       |
| ELFS | 2007 | 228 | 5  | 37     | 2.689     | F         | 0.500   | 0.276  |       |
| TPNV | 2007 | 228 | 5  | 36     | 1.364     | F         | 0.500   | 0.733  |       |
| S10A | 2007 | 228 | 5  | 36     | 12.095    | F         | 0.500   | 0.360  |       |
| M03C | 2007 | 228 | 5  | 37     | 13.870    | F         | 0.500   | -2.765 |       |
| YO03 | 2007 | 228 | 5  | 36     | 32.108    | F         | 0.500   | -0.589 |       |
| YO02 | 2007 | 228 | 5  | 36     | 32.056    | F         | 0.500   | -0.723 |       |
| SN55 | 2007 | 228 | 5  | 36     | 30.765    | F         | 0.500   | 0.070  |       |
| YO01 | 2007 | 228 | 5  | 36     | 31.900    | F         | 0.500   | -0.696 |       |
| YO04 | 2007 | 228 | 5  | 36     | 32.410    | F         | 0.500   | -0.257 |       |
| YO09 | 2007 | 228 | 5  | 36     | 31.153    | F         | 0.500   | -0.194 |       |
| VES  | 2007 | 228 | 5  | 36     | 11.526    | F         | 0.500   | 0.258  |       |
| S09A | 2007 | 228 | 5  | 36     | 14.994    | F         | 0.500   | 0.742  |       |
| HAST | 2007 | 228 | 5  | 36     | 34.839    | F         | 0.500   | 0.777  |       |
| YO11 | 2007 | 228 | 5  | 36     | 31.319    | F         | 0.500   | 0.121  |       |
| MNRC | 2007 | 228 | 5  | 37     | 1.252     | F         | 0.500   | 1.325  |       |

|      |      |     |   |    |        |   |       |        |
|------|------|-----|---|----|--------|---|-------|--------|
| Q10A | 2007 | 228 | 5 | 36 | 19.138 | F | 0.500 | 0.732  |
| I09A | 2007 | 228 | 5 | 37 | 9.181  | F | 0.500 | -2.134 |
| GRA  | 2007 | 228 | 5 | 36 | 9.714  | F | 0.500 | 0.845  |
| GASB | 2007 | 228 | 5 | 37 | 9.990  | F | 0.500 | 1.934  |
| YO10 | 2007 | 228 | 5 | 36 | 30.909 | F | 0.500 | -0.350 |
| SNB5 | 2007 | 228 | 5 | 36 | 46.607 | F | 0.500 | -0.113 |
| MCCM | 2007 | 228 | 5 | 36 | 57.621 | F | 0.500 | 0.375  |
| ISA  | 2007 | 228 | 5 | 36 | 5.645  | F | 0.500 | 0.155  |
| ADO  | 2007 | 228 | 5 | 35 | 48.824 | F | 0.500 | 0.716  |
| MPM  | 2007 | 228 | 5 | 36 | 2.858  | F | 0.500 | 0.973  |
| HELL | 2007 | 228 | 5 | 36 | 17.247 | F | 0.500 | -0.736 |
| RCT  | 2007 | 228 | 5 | 36 | 14.988 | F | 0.500 | -1.333 |
| SND5 | 2007 | 228 | 5 | 36 | 51.575 | F | 0.500 | -0.380 |
| SND4 | 2007 | 228 | 5 | 36 | 51.996 | F | 0.500 | -0.313 |
| J09A | 2007 | 228 | 5 | 37 | 4.600  | F | 0.500 | -1.471 |
| BMN  | 2007 | 228 | 5 | 36 | 36.164 | F | 0.500 | -1.533 |
| OSI  | 2007 | 228 | 5 | 35 | 57.982 | F | 0.500 | -0.366 |
| SNB9 | 2007 | 228 | 5 | 36 | 45.141 | F | 0.500 | 0.436  |
| SNE4 | 2007 | 228 | 5 | 36 | 54.808 | F | 0.500 | -0.338 |
| WCN  | 2007 | 228 | 5 | 36 | 46.261 | F | 0.500 | 1.040  |
| DJJ  | 2007 | 228 | 5 | 35 | 52.730 | F | 0.500 | 0.671  |
| HOPS | 2007 | 228 | 5 | 37 | 7.185  | F | 0.500 | 2.052  |
| PLM  | 2007 | 228 | 5 | 35 | 34.377 | F | 0.500 | 0.771  |
| O04C | 2007 | 228 | 5 | 37 | 2.449  | F | 0.500 | 0.199  |
| SNE9 | 2007 | 228 | 5 | 36 | 54.676 | F | 0.500 | 0.670  |
| VCS  | 2007 | 228 | 5 | 35 | 52.362 | F | 0.500 | -0.465 |
| P05C | 2007 | 228 | 5 | 36 | 50.999 | F | 0.500 | 0.151  |
| FUR  | 2007 | 228 | 5 | 36 | 1.134  | F | 0.500 | 0.697  |
| CIA  | 2007 | 228 | 5 | 35 | 45.969 | F | 0.500 | 0.339  |
| O10A | 2007 | 228 | 5 | 36 | 31.189 | F | 0.500 | -0.872 |
| L09A | 2007 | 228 | 5 | 36 | 52.465 | F | 0.500 | -1.846 |
| SN97 | 2007 | 228 | 5 | 36 | 41.875 | F | 0.500 | 0.344  |
| SNC7 | 2007 | 228 | 5 | 36 | 49.654 | F | 0.500 | -0.094 |
| SND8 | 2007 | 228 | 5 | 36 | 51.799 | F | 0.500 | 0.625  |
| SNC6 | 2007 | 228 | 5 | 36 | 48.038 | F | 0.500 | -0.234 |
| CMB  | 2007 | 228 | 5 | 36 | 38.920 | F | 0.500 | -0.064 |
| N08A | 2007 | 228 | 5 | 36 | 45.916 | F | 0.500 | -0.820 |
| MWC  | 2007 | 228 | 5 | 35 | 50.629 | F | 0.500 | 0.464  |
| SNE5 | 2007 | 228 | 5 | 36 | 54.432 | F | 0.500 | -0.733 |
| M10A | 2007 | 228 | 5 | 36 | 42.351 | F | 0.500 | -0.732 |
| EDW2 | 2007 | 228 | 5 | 35 | 53.955 | F | 0.500 | -1.265 |
| SNG7 | 2007 | 228 | 5 | 37 | 1.232  | F | 0.500 | 0.136  |
| SNF8 | 2007 | 228 | 5 | 36 | 57.337 | F | 0.500 | 0.312  |
| SNA3 | 2007 | 228 | 5 | 36 | 44.211 | F | 0.500 | 0.196  |
| SNA4 | 2007 | 228 | 5 | 36 | 43.823 | F | 0.500 | -0.023 |
| SN93 | 2007 | 228 | 5 | 36 | 41.312 | F | 0.500 | 0.094  |
| RRX  | 2007 | 228 | 5 | 35 | 47.929 | F | 0.500 | 0.184  |
| J10A | 2007 | 228 | 5 | 36 | 59.383 | F | 0.500 | -1.396 |
| SNG5 | 2007 | 228 | 5 | 37 | 0.444  | F | 0.500 | 0.034  |
| SVD  | 2007 | 228 | 5 | 35 | 42.880 | F | 0.500 | 1.242  |
| N07B | 2007 | 228 | 5 | 36 | 51.279 | F | 0.500 | -0.764 |
| SNC5 | 2007 | 228 | 5 | 36 | 48.912 | F | 0.500 | -0.699 |
| SNE6 | 2007 | 228 | 5 | 36 | 54.141 | F | 0.500 | 0.235  |
| O09A | 2007 | 228 | 5 | 36 | 34.132 | F | 0.500 | -1.238 |
| SND7 | 2007 | 228 | 5 | 36 | 53.805 | F | 0.500 | 0.361  |
| K11A | 2007 | 228 | 5 | 36 | 50.491 | F | 0.500 | -0.344 |
| DEC  | 2007 | 228 | 5 | 35 | 52.968 | F | 0.500 | 0.682  |
| SNB3 | 2007 | 228 | 5 | 36 | 47.328 | F | 0.500 | 0.075  |
| ORV  | 2007 | 228 | 5 | 36 | 59.051 | F | 0.500 | 0.508  |
| PASC | 2007 | 228 | 5 | 35 | 51.141 | F | 0.500 | 0.637  |
| O08A | 2007 | 228 | 5 | 36 | 41.904 | F | 0.500 | -0.948 |
| DGR  | 2007 | 228 | 5 | 35 | 38.348 | F | 0.500 | 1.198  |
| SN96 | 2007 | 228 | 5 | 36 | 40.542 | F | 0.500 | 0.131  |

|      |      |     |   |    |        |   |       |        |
|------|------|-----|---|----|--------|---|-------|--------|
| VTV  | 2007 | 228 | 5 | 35 | 47.436 | F | 0.500 | -0.089 |
| SNE7 | 2007 | 228 | 5 | 36 | 56.141 | F | 0.500 | 0.324  |
| HEC  | 2007 | 228 | 5 | 35 | 42.963 | F | 0.500 | 0.480  |
| O05C | 2007 | 228 | 5 | 36 | 58.737 | F | 0.500 | 0.599  |
| SNF6 | 2007 | 228 | 5 | 36 | 57.147 | F | 0.500 | -0.165 |
| N06A | 2007 | 228 | 5 | 36 | 57.510 | F | 0.500 | 0.210  |
| LRL  | 2007 | 228 | 5 | 35 | 58.180 | F | 0.500 | 0.103  |
| MUR  | 2007 | 228 | 5 | 35 | 39.077 | F | 0.500 | 1.000  |
| BFS  | 2007 | 228 | 5 | 35 | 48.196 | F | 0.500 | 0.877  |
| L10A | 2007 | 228 | 5 | 36 | 46.777 | F | 0.500 | -0.666 |
| GSC  | 2007 | 228 | 5 | 35 | 50.890 | F | 0.500 | 0.759  |
| SHO  | 2007 | 228 | 5 | 35 | 51.628 | F | 0.500 | 0.354  |
| CHF  | 2007 | 228 | 5 | 35 | 51.279 | F | 0.500 | 0.486  |
| BBR  | 2007 | 228 | 5 | 35 | 43.120 | F | 0.500 | 1.124  |

|      |      |     |    |         |           |           |         |        |       |
|------|------|-----|----|---------|-----------|-----------|---------|--------|-------|
| 2007 | 230  | 2   | 52 | 39.7725 | -13.80500 | -76.29100 | 30.0000 | 61     | 4.373 |
| DJJ  | 2007 | 230 | 3  | 11      | 24.805    | F         | 0.500   | 0.769  |       |
| GSC  | 2007 | 230 | 3  | 11      | 22.833    | F         | 0.500   | 0.807  |       |
| VCS  | 2007 | 230 | 3  | 11      | 24.720    | F         | 0.500   | -0.067 |       |
| K09A | 2007 | 230 | 3  | 12      | 30.966    | F         | 0.500   | -1.380 |       |
| YO05 | 2007 | 230 | 3  | 12      | 4.532     | F         | 0.500   | -0.254 |       |
| YO03 | 2007 | 230 | 3  | 12      | 4.250     | F         | 0.500   | -0.503 |       |
| L09A | 2007 | 230 | 3  | 12      | 24.593    | F         | 0.500   | -1.738 |       |
| SN63 | 2007 | 230 | 3  | 12      | 3.925     | F         | 0.500   | -0.691 |       |
| SN64 | 2007 | 230 | 3  | 12      | 4.600     | F         | 0.500   | -0.131 |       |
| SND9 | 2007 | 230 | 3  | 12      | 24.199    | F         | 0.500   | 0.964  |       |
| PASC | 2007 | 230 | 3  | 11      | 23.201    | F         | 0.500   | 0.735  |       |
| P05C | 2007 | 230 | 3  | 12      | 23.068    | F         | 0.500   | 0.106  |       |
| O06A | 2007 | 230 | 3  | 12      | 25.135    | F         | 0.500   | 0.409  |       |
| SNE4 | 2007 | 230 | 3  | 12      | 26.741    | F         | 0.500   | -0.550 |       |
| PLM  | 2007 | 230 | 3  | 11      | 6.792     | F         | 0.500   | 1.309  |       |
| SNF8 | 2007 | 230 | 3  | 12      | 29.665    | F         | 0.500   | 0.520  |       |
| SNE6 | 2007 | 230 | 3  | 12      | 26.173    | F         | 0.500   | 0.140  |       |
| SHO  | 2007 | 230 | 3  | 11      | 23.650    | F         | 0.500   | 0.500  |       |
| SNB3 | 2007 | 230 | 3  | 12      | 19.459    | F         | 0.500   | 0.081  |       |
| SND8 | 2007 | 230 | 3  | 12      | 23.953    | F         | 0.500   | 0.679  |       |
| YO04 | 2007 | 230 | 3  | 12      | 4.502     | F         | 0.500   | -0.224 |       |
| SN96 | 2007 | 230 | 3  | 12      | 12.675    | F         | 0.500   | 0.185  |       |
| HELL | 2007 | 230 | 3  | 11      | 49.315    | F         | 0.500   | -0.687 |       |
| N07B | 2007 | 230 | 3  | 12      | 23.522    | F         | 0.500   | -0.576 |       |
| VTV  | 2007 | 230 | 3  | 11      | 19.482    | F         | 0.500   | 0.044  |       |
| K10A | 2007 | 230 | 3  | 12      | 27.434    | F         | 0.500   | -0.563 |       |
| SNA4 | 2007 | 230 | 3  | 12      | 15.881    | F         | 0.500   | -0.056 |       |
| SNE9 | 2007 | 230 | 3  | 12      | 26.883    | F         | 0.500   | 0.775  |       |
| HEC  | 2007 | 230 | 3  | 11      | 14.978    | F         | 0.500   | 0.641  |       |
| I06A | 2007 | 230 | 3  | 12      | 57.837    | F         | 0.500   | -0.211 |       |
| CMB  | 2007 | 230 | 3  | 12      | 10.967    | F         | 0.500   | -0.107 |       |
| SNE7 | 2007 | 230 | 3  | 12      | 28.251    | F         | 0.500   | 0.313  |       |
| BDM  | 2007 | 230 | 3  | 12      | 22.209    | F         | 0.500   | 1.385  |       |
| MUR  | 2007 | 230 | 3  | 11      | 11.281    | F         | 0.500   | 1.320  |       |
| SNF6 | 2007 | 230 | 3  | 12      | 29.142    | F         | 0.500   | -0.306 |       |
| ORV  | 2007 | 230 | 3  | 12      | 31.115    | F         | 0.500   | 0.415  |       |
| SNE5 | 2007 | 230 | 3  | 12      | 26.578    | F         | 0.500   | -0.726 |       |
| LRL  | 2007 | 230 | 3  | 11      | 30.270    | F         | 0.500   | 0.254  |       |
| SN93 | 2007 | 230 | 3  | 12      | 13.520    | F         | 0.500   | 0.205  |       |
| SNG7 | 2007 | 230 | 3  | 12      | 33.586    | F         | 0.500   | 0.340  |       |
| SNF9 | 2007 | 230 | 3  | 12      | 29.214    | F         | 0.500   | 0.431  |       |
| SND7 | 2007 | 230 | 3  | 12      | 25.975    | F         | 0.500   | 0.414  |       |
| DGR  | 2007 | 230 | 3  | 11      | 10.393    | F         | 0.500   | 1.364  |       |
| SNC3 | 2007 | 230 | 3  | 12      | 21.830    | F         | 0.500   | -0.205 |       |
| MWC  | 2007 | 230 | 3  | 11      | 22.733    | F         | 0.500   | 0.614  |       |
| SNG5 | 2007 | 230 | 3  | 12      | 32.661    | F         | 0.500   | 0.095  |       |
| SNA3 | 2007 | 230 | 3  | 12      | 16.226    | F         | 0.500   | 0.111  |       |

|      |      |     |   |    |        |   |       |        |
|------|------|-----|---|----|--------|---|-------|--------|
| BBR  | 2007 | 230 | 3 | 11 | 15.312 | F | 0.500 | 1.438  |
| CHF  | 2007 | 230 | 3 | 11 | 23.281 | F | 0.500 | 0.534  |
| SVD  | 2007 | 230 | 3 | 11 | 14.931 | F | 0.500 | 1.402  |
| L10A | 2007 | 230 | 3 | 12 | 18.707 | F | 0.500 | -0.707 |
| R04C | 2007 | 230 | 3 | 12 | 17.258 | F | 0.500 | 0.810  |
| BFS  | 2007 | 230 | 3 | 11 | 20.228 | F | 0.500 | 0.982  |
| M09A | 2007 | 230 | 3 | 12 | 18.680 | F | 0.500 | -1.050 |
| M10A | 2007 | 230 | 3 | 12 | 14.402 | F | 0.500 | -0.639 |
| L07A | 2007 | 230 | 3 | 12 | 36.237 | F | 0.500 | -0.616 |
| O10A | 2007 | 230 | 3 | 12 | 3.485  | F | 0.500 | -0.513 |
| T06C | 2007 | 230 | 3 | 11 | 54.851 | F | 0.500 | -2.651 |
| OSI  | 2007 | 230 | 3 | 11 | 30.103 | F | 0.500 | -0.240 |
| SUTB | 2007 | 230 | 3 | 12 | 29.891 | F | 0.500 | -0.356 |
| RCT  | 2007 | 230 | 3 | 11 | 47.044 | F | 0.500 | -1.301 |
| I09A | 2007 | 230 | 3 | 12 | 41.435 | F | 0.500 | -1.946 |
| EDW2 | 2007 | 230 | 3 | 11 | 26.058 | F | 0.500 | -1.112 |
| ARV  | 2007 | 230 | 3 | 11 | 35.618 | F | 0.500 | 0.366  |
| GRA  | 2007 | 230 | 3 | 11 | 42.001 | F | 0.500 | 1.202  |
| YO10 | 2007 | 230 | 3 | 12 | 3.007  | F | 0.500 | -0.295 |
| ISA  | 2007 | 230 | 3 | 11 | 37.728 | F | 0.500 | 0.259  |
| R06C | 2007 | 230 | 3 | 12 | 9.916  | F | 0.500 | 1.223  |
| SND4 | 2007 | 230 | 3 | 12 | 23.939 | F | 0.500 | -0.509 |
| Q10A | 2007 | 230 | 3 | 11 | 51.103 | F | 0.500 | 0.777  |
| DEC  | 2007 | 230 | 3 | 11 | 25.087 | F | 0.500 | 0.833  |
| YO08 | 2007 | 230 | 3 | 12 | 3.398  | F | 0.500 | -0.154 |
| SNC7 | 2007 | 230 | 3 | 12 | 22.112 | F | 0.500 | 0.259  |
| YO07 | 2007 | 230 | 3 | 12 | 3.582  | F | 0.500 | -0.413 |
| SNC6 | 2007 | 230 | 3 | 12 | 20.198 | F | 0.500 | -0.177 |
| SN97 | 2007 | 230 | 3 | 12 | 13.950 | F | 0.500 | 0.354  |
| TIN  | 2007 | 230 | 3 | 11 | 48.250 | F | 0.500 | 0.821  |
| SNC5 | 2007 | 230 | 3 | 12 | 21.282 | F | 0.500 | -0.448 |
| L08A | 2007 | 230 | 3 | 12 | 29.859 | F | 0.500 | -2.136 |
| S06C | 2007 | 230 | 3 | 12 | 5.561  | F | 0.500 | -0.504 |
| R05C | 2007 | 230 | 3 | 12 | 14.785 | F | 0.500 | -0.021 |
| YO02 | 2007 | 230 | 3 | 12 | 4.199  | F | 0.500 | -0.638 |
| YO06 | 2007 | 230 | 3 | 12 | 4.253  | F | 0.500 | -0.227 |
| SND5 | 2007 | 230 | 3 | 12 | 23.658 | F | 0.500 | -0.425 |
| O09A | 2007 | 230 | 3 | 12 | 6.205  | F | 0.500 | -1.133 |

|      |      |     |    |         |         |           |        |        |       |
|------|------|-----|----|---------|---------|-----------|--------|--------|-------|
| 2007 | 232  | 22  | 42 | 32.4879 | 8.03700 | -39.25100 | 6.0000 | 62     | 3.958 |
| WCN  | 2007 | 232 | 23 | 4       | 23.014  | F         | 0.500  | -0.161 |       |
| LAVA | 2007 | 232 | 23 | 4       | 31.783  | F         | 0.500  | 0.484  |       |
| SN93 | 2007 | 232 | 23 | 4       | 30.967  | F         | 0.500  | 0.822  |       |
| SNF8 | 2007 | 232 | 23 | 4       | 30.268  | F         | 0.500  | -0.228 |       |
| SNB7 | 2007 | 232 | 23 | 4       | 27.198  | F         | 0.500  | 0.630  |       |
| SND5 | 2007 | 232 | 23 | 4       | 33.146  | F         | 0.500  | 0.400  |       |
| SN97 | 2007 | 232 | 23 | 4       | 23.790  | F         | 0.500  | 0.159  |       |
| SNB5 | 2007 | 232 | 23 | 4       | 30.144  | F         | 0.500  | 0.415  |       |
| DJJ  | 2007 | 232 | 23 | 4       | 11.310  | F         | 0.500  | -0.814 |       |
| SNA4 | 2007 | 232 | 23 | 4       | 30.415  | F         | 0.500  | 0.800  |       |
| SNA7 | 2007 | 232 | 23 | 4       | 24.473  | F         | 0.500  | -0.049 |       |
| YO10 | 2007 | 232 | 23 | 4       | 21.007  | F         | 0.500  | 0.119  |       |
| SNC5 | 2007 | 232 | 23 | 4       | 31.999  | F         | 0.500  | 0.626  |       |
| SN63 | 2007 | 232 | 23 | 4       | 24.207  | F         | 0.500  | 0.374  |       |
| YO08 | 2007 | 232 | 23 | 4       | 22.361  | F         | 0.500  | 0.731  |       |
| YO01 | 2007 | 232 | 23 | 4       | 24.103  | F         | 0.500  | 0.450  |       |
| SND8 | 2007 | 232 | 23 | 4       | 26.918  | F         | 0.500  | -0.077 |       |
| HELL | 2007 | 232 | 23 | 4       | 15.590  | F         | 0.500  | -1.339 |       |
| YO02 | 2007 | 232 | 23 | 4       | 23.935  | F         | 0.500  | 0.436  |       |
| YO05 | 2007 | 232 | 23 | 4       | 23.392  | F         | 0.500  | 0.525  |       |
| YO09 | 2007 | 232 | 23 | 4       | 22.128  | F         | 0.500  | 0.788  |       |
| SN64 | 2007 | 232 | 23 | 4       | 23.275  | F         | 0.500  | 0.687  |       |
| YO03 | 2007 | 232 | 23 | 4       | 23.764  | F         | 0.500  | 0.551  |       |

|      |      |     |    |   |        |   |       |        |
|------|------|-----|----|---|--------|---|-------|--------|
| YO07 | 2007 | 232 | 23 | 4 | 22.658 | F | 0.500 | 0.634  |
| YO04 | 2007 | 232 | 23 | 4 | 23.572 | F | 0.500 | 0.612  |
| YO11 | 2007 | 232 | 23 | 4 | 21.490 | F | 0.500 | 0.963  |
| P05C | 2007 | 232 | 23 | 4 | 30.741 | F | 0.500 | 0.447  |
| YO06 | 2007 | 232 | 23 | 4 | 23.051 | F | 0.500 | 0.684  |
| SN96 | 2007 | 232 | 23 | 4 | 26.217 | F | 0.500 | 0.527  |
| R05C | 2007 | 232 | 23 | 4 | 26.371 | F | 0.500 | 0.260  |
| SNC6 | 2007 | 232 | 23 | 4 | 29.491 | F | 0.500 | 0.323  |
| CMB  | 2007 | 232 | 23 | 4 | 29.545 | F | 0.500 | 1.152  |
| RRX  | 2007 | 232 | 23 | 3 | 58.598 | F | 0.500 | -0.237 |
| FUR  | 2007 | 232 | 23 | 3 | 58.261 | F | 0.500 | 0.669  |
| JCC  | 2007 | 232 | 23 | 5 | 0.136  | F | 0.500 | 3.132  |
| CVS  | 2007 | 232 | 23 | 4 | 46.900 | F | 0.500 | 1.427  |
| BNLO | 2007 | 232 | 23 | 4 | 44.754 | F | 0.500 | 0.862  |
| GSC  | 2007 | 232 | 23 | 3 | 57.299 | F | 0.500 | 0.116  |
| DBO  | 2007 | 232 | 23 | 4 | 48.026 | F | 0.500 | -2.026 |
| BDM  | 2007 | 232 | 23 | 4 | 41.285 | F | 0.500 | 0.441  |
| O09A | 2007 | 232 | 23 | 4 | 0.319  | F | 0.500 | -1.124 |
| BBR  | 2007 | 232 | 23 | 3 | 58.666 | F | 0.500 | 0.194  |
| M01C | 2007 | 232 | 23 | 4 | 59.059 | F | 0.500 | 1.812  |
| HOPS | 2007 | 232 | 23 | 4 | 53.137 | F | 0.500 | 2.805  |
| MNRC | 2007 | 232 | 23 | 4 | 47.699 | F | 0.500 | 2.407  |
| SVD  | 2007 | 232 | 23 | 3 | 59.595 | F | 0.500 | -0.062 |
| WENL | 2007 | 232 | 23 | 4 | 40.869 | F | 0.500 | 0.899  |
| GASB | 2007 | 232 | 23 | 4 | 47.980 | F | 0.500 | 0.528  |
| SLA  | 2007 | 232 | 23 | 4 | 1.557  | F | 0.500 | 0.081  |
| Q09A | 2007 | 232 | 23 | 3 | 59.384 | F | 0.500 | -1.834 |
| MPM  | 2007 | 232 | 23 | 4 | 3.958  | F | 0.500 | 0.291  |
| M02C | 2007 | 232 | 23 | 4 | 45.931 | F | 0.500 | -1.799 |
| GRA  | 2007 | 232 | 23 | 4 | 2.108  | F | 0.500 | -0.195 |
| L05A | 2007 | 232 | 23 | 4 | 31.569 | F | 0.500 | -0.049 |
| S09A | 2007 | 232 | 23 | 4 | 0.575  | F | 0.500 | -0.804 |
| SUTB | 2007 | 232 | 23 | 4 | 40.949 | F | 0.500 | 1.362  |
| K05A | 2007 | 232 | 23 | 4 | 31.498 | F | 0.500 | -0.651 |
| LRL  | 2007 | 232 | 23 | 4 | 5.412  | F | 0.500 | 0.149  |
| HAST | 2007 | 232 | 23 | 4 | 39.663 | F | 0.500 | 0.769  |
| M07A | 2007 | 232 | 23 | 4 | 15.962 | F | 0.500 | -2.198 |
| HUMO | 2007 | 232 | 23 | 4 | 47.230 | F | 0.500 | -0.622 |
| N07B | 2007 | 232 | 23 | 4 | 14.657 | F | 0.500 | -1.838 |
| YBH  | 2007 | 232 | 23 | 4 | 45.578 | F | 0.500 | -0.898 |
| L07A | 2007 | 232 | 23 | 4 | 18.500 | F | 0.500 | -1.178 |
| CIA  | 2007 | 232 | 23 | 4 | 12.049 | F | 0.500 | 0.230  |
| M03C | 2007 | 232 | 23 | 4 | 41.706 | F | 0.500 | -0.161 |
| FMP  | 2007 | 232 | 23 | 4 | 10.598 | F | 0.500 | -0.072 |
| M06C | 2007 | 232 | 23 | 4 | 27.966 | F | 0.500 | -0.825 |
| RPV  | 2007 | 232 | 23 | 4 | 11.298 | F | 0.500 | -0.210 |
| VES  | 2007 | 232 | 23 | 4 | 15.818 | F | 0.500 | -1.598 |
| PHL  | 2007 | 232 | 23 | 4 | 29.688 | F | 0.500 | -0.768 |
| Q08A | 2007 | 232 | 23 | 4 | 5.678  | F | 0.500 | -1.799 |
| SNG5 | 2007 | 232 | 23 | 4 | 37.541 | F | 0.500 | 0.116  |
| VCS  | 2007 | 232 | 23 | 4 | 7.618  | F | 0.500 | -1.575 |
| BFS  | 2007 | 232 | 23 | 4 | 3.964  | F | 0.500 | -1.167 |
| R08A | 2007 | 232 | 23 | 4 | 8.113  | F | 0.500 | -0.910 |
| K04A | 2007 | 232 | 23 | 4 | 38.733 | F | 0.500 | 0.137  |
| V05C | 2007 | 232 | 23 | 4 | 23.699 | F | 0.500 | -0.929 |
| PACP | 2007 | 232 | 23 | 4 | 36.845 | F | 0.500 | 0.493  |
| U04C | 2007 | 232 | 23 | 4 | 31.620 | F | 0.500 | -0.647 |
| SNE5 | 2007 | 232 | 23 | 4 | 34.922 | F | 0.500 | 0.394  |
| SNG7 | 2007 | 232 | 23 | 4 | 34.505 | F | 0.500 | -0.128 |
| EDW2 | 2007 | 232 | 23 | 4 | 7.075  | F | 0.500 | -0.895 |
| ORV  | 2007 | 232 | 23 | 4 | 38.164 | F | 0.500 | 1.027  |
| SBC  | 2007 | 232 | 23 | 4 | 22.917 | F | 0.500 | -0.313 |
| CWC  | 2007 | 232 | 23 | 4 | 9.821  | F | 0.500 | 1.082  |

|      |      |     |    |   |        |   |       |        |
|------|------|-----|----|---|--------|---|-------|--------|
| BAK  | 2007 | 232 | 23 | 4 | 17.709 | F | 0.500 | 0.017  |
| RCT  | 2007 | 232 | 23 | 4 | 16.359 | F | 0.500 | -2.349 |
| ARV  | 2007 | 232 | 23 | 4 | 15.249 | F | 0.500 | -0.011 |
| SNC3 | 2007 | 232 | 23 | 4 | 35.806 | F | 0.500 | 0.933  |
| CHF  | 2007 | 232 | 23 | 4 | 7.198  | F | 0.500 | -1.286 |
| ISA  | 2007 | 232 | 23 | 4 | 11.928 | F | 0.500 | -0.304 |
| TIN  | 2007 | 232 | 23 | 4 | 10.002 | F | 0.500 | 0.049  |
| SNB3 | 2007 | 232 | 23 | 4 | 34.077 | F | 0.500 | 0.928  |
| SND4 | 2007 | 232 | 23 | 4 | 35.459 | F | 0.500 | 0.940  |
| SNE4 | 2007 | 232 | 23 | 4 | 36.727 | F | 0.500 | 0.757  |
| SCZ2 | 2007 | 232 | 23 | 4 | 21.817 | F | 0.500 | -0.997 |
| PKD  | 2007 | 232 | 23 | 4 | 29.799 | F | 0.500 | -0.505 |
| SNB9 | 2007 | 232 | 23 | 4 | 21.559 | F | 0.500 | -0.270 |
| SNF6 | 2007 | 232 | 23 | 4 | 34.173 | F | 0.500 | 0.021  |
| DEC  | 2007 | 232 | 23 | 4 | 9.695  | F | 0.500 | -1.346 |
| SN87 | 2007 | 232 | 23 | 4 | 22.308 | F | 0.500 | 0.024  |
| SND9 | 2007 | 232 | 23 | 4 | 24.671 | F | 0.500 | -0.445 |
| MWC  | 2007 | 232 | 23 | 4 | 7.650  | F | 0.500 | -1.123 |
| PASC | 2007 | 232 | 23 | 4 | 8.507  | F | 0.500 | -1.120 |
| SNE7 | 2007 | 232 | 23 | 4 | 31.093 | F | 0.500 | 0.067  |
| MPP  | 2007 | 232 | 23 | 4 | 24.685 | F | 0.500 | 0.217  |
| O06A | 2007 | 232 | 23 | 4 | 22.600 | F | 0.500 | -0.898 |
| SNC7 | 2007 | 232 | 23 | 4 | 29.663 | F | 0.500 | 1.051  |
| LGU  | 2007 | 232 | 23 | 4 | 16.527 | F | 0.500 | -1.045 |
| SNE9 | 2007 | 232 | 23 | 4 | 26.180 | F | 0.500 | -0.440 |
| SNA3 | 2007 | 232 | 23 | 4 | 31.801 | F | 0.500 | 0.804  |
| SNF9 | 2007 | 232 | 23 | 4 | 28.245 | F | 0.500 | -0.056 |
| SMM  | 2007 | 232 | 23 | 4 | 25.541 | F | 0.500 | -0.075 |
| SNE6 | 2007 | 232 | 23 | 4 | 32.487 | F | 0.500 | 0.457  |
| SND7 | 2007 | 232 | 23 | 4 | 30.130 | F | 0.500 | 0.165  |

|      |      |     |    |         |           |            |          |        |
|------|------|-----|----|---------|-----------|------------|----------|--------|
| 2007 | 238  | 12  | 37 | 38.5564 | -17.45700 | -174.33501 | 127.4000 |        |
| SND5 | 2007 | 238 | 12 | 58      | 36.015    | F          | 0.500    | -0.610 |
| SNF9 | 2007 | 238 | 12 | 58      | 45.728    | F          | 0.500    | -1.273 |
| S08C | 2007 | 238 | 12 | 58      | 47.295    | F          | 0.500    | 1.807  |
| TPNV | 2007 | 238 | 12 | 58      | 56.042    | F          | 0.500    | 0.421  |
| P01C | 2007 | 238 | 12 | 58      | 23.555    | F          | 0.500    | 1.215  |
| L08A | 2007 | 238 | 12 | 59      | 12.233    | F          | 0.500    | -1.046 |
| K07A | 2007 | 238 | 12 | 59      | 10.489    | F          | 0.500    | -0.107 |
| PLM  | 2007 | 238 | 12 | 58      | 29.572    | F          | 0.500    | 0.221  |
| L02A | 2007 | 238 | 12 | 58      | 41.368    | F          | 0.500    | 1.695  |
| PACP | 2007 | 238 | 12 | 58      | 20.487    | F          | 0.500    | 0.793  |
| EDW2 | 2007 | 238 | 12 | 58      | 29.962    | F          | 0.500    | 0.112  |
| U04C | 2007 | 238 | 12 | 58      | 20.721    | F          | 0.500    | 1.928  |
| SND9 | 2007 | 238 | 12 | 58      | 48.309    | F          | 0.500    | 0.764  |
| WVOR | 2007 | 238 | 12 | 59      | 12.474    | F          | 0.500    | -0.320 |
| SNE9 | 2007 | 238 | 12 | 58      | 46.736    | F          | 0.500    | -0.953 |
| TPH  | 2007 | 238 | 12 | 58      | 55.808    | F          | 0.500    | 0.254  |
| HUMO | 2007 | 238 | 12 | 58      | 48.733    | F          | 0.500    | 1.872  |
| SNC3 | 2007 | 238 | 12 | 58      | 31.143    | F          | 0.500    | -0.282 |
| TIN  | 2007 | 238 | 12 | 58      | 42.262    | F          | 0.500    | 0.288  |
| CIA  | 2007 | 238 | 12 | 58      | 17.686    | F          | 0.500    | 0.182  |
| CVS  | 2007 | 238 | 12 | 58      | 20.399    | F          | 0.500    | -0.145 |
| MUR  | 2007 | 238 | 12 | 58      | 27.975    | F          | 0.500    | -0.156 |
| N07B | 2007 | 238 | 12 | 58      | 59.960    | F          | 0.500    | -0.283 |
| YBH  | 2007 | 238 | 12 | 58      | 43.653    | F          | 0.500    | 1.284  |
| SVD  | 2007 | 238 | 12 | 58      | 31.946    | F          | 0.500    | -0.103 |
| M02C | 2007 | 238 | 12 | 58      | 40.620    | F          | 0.500    | 1.557  |
| SND8 | 2007 | 238 | 12 | 58      | 45.212    | F          | 0.500    | 0.570  |
| CWC  | 2007 | 238 | 12 | 58      | 39.758    | F          | 0.500    | 0.325  |
| K11A | 2007 | 238 | 12 | 59      | 30.450    | F          | 0.500    | -0.798 |
| HAST | 2007 | 238 | 12 | 58      | 14.664    | F          | 0.500    | 1.379  |
| SHO  | 2007 | 238 | 12 | 58      | 49.032    | F          | 0.500    | 0.020  |

63

7.366

|      |      |     |    |    |        |   |       |        |
|------|------|-----|----|----|--------|---|-------|--------|
| M05C | 2007 | 238 | 12 | 58 | 50.887 | F | 0.500 | 0.898  |
| J08A | 2007 | 238 | 12 | 59 | 18.650 | F | 0.500 | -0.940 |
| SNC5 | 2007 | 238 | 12 | 58 | 36.551 | F | 0.500 | -0.342 |
| K08A | 2007 | 238 | 12 | 59 | 15.137 | F | 0.500 | -0.664 |
| S05C | 2007 | 238 | 12 | 58 | 28.143 | F | 0.500 | -0.484 |
| FARB | 2007 | 238 | 12 | 58 | 12.950 | F | 0.500 | 1.034  |
| SLA  | 2007 | 238 | 12 | 58 | 41.635 | F | 0.500 | -0.042 |
| BFS  | 2007 | 238 | 12 | 58 | 28.408 | F | 0.500 | -0.106 |
| GASB | 2007 | 238 | 12 | 58 | 29.585 | F | 0.500 | 1.658  |
| BDM  | 2007 | 238 | 12 | 58 | 23.067 | F | 0.500 | 1.413  |
| SNB3 | 2007 | 238 | 12 | 58 | 31.195 | F | 0.500 | -0.969 |
| L10A | 2007 | 238 | 12 | 59 | 23.098 | F | 0.500 | -1.636 |
| SN96 | 2007 | 238 | 12 | 58 | 38.235 | F | 0.500 | -0.331 |
| GSC  | 2007 | 238 | 12 | 58 | 41.436 | F | 0.500 | -0.001 |
| DGR  | 2007 | 238 | 12 | 58 | 29.567 | F | 0.500 | -0.195 |
| RCT  | 2007 | 238 | 12 | 58 | 28.417 | F | 0.500 | -1.130 |
| WDC  | 2007 | 238 | 12 | 58 | 35.352 | F | 0.500 | 0.008  |
| LRL  | 2007 | 238 | 12 | 58 | 36.839 | F | 0.500 | 0.836  |
| S04C | 2007 | 238 | 12 | 58 | 23.338 | F | 0.500 | 0.767  |
| SNC7 | 2007 | 238 | 12 | 58 | 41.489 | F | 0.500 | -0.046 |
| SND4 | 2007 | 238 | 12 | 58 | 33.592 | F | 0.500 | -0.477 |
| SNE6 | 2007 | 238 | 12 | 58 | 39.300 | F | 0.500 | -0.201 |
| SND7 | 2007 | 238 | 12 | 58 | 42.242 | F | 0.500 | -0.008 |
| R05C | 2007 | 238 | 12 | 58 | 39.609 | F | 0.500 | -0.190 |
| R04C | 2007 | 238 | 12 | 58 | 29.414 | F | 0.500 | -0.804 |
| SNE7 | 2007 | 238 | 12 | 58 | 42.321 | F | 0.500 | -0.204 |
| SNF6 | 2007 | 238 | 12 | 58 | 38.880 | F | 0.500 | -0.324 |
| SN93 | 2007 | 238 | 12 | 58 | 31.806 | F | 0.500 | -0.043 |
| YO10 | 2007 | 238 | 12 | 58 | 38.547 | F | 0.500 | -0.131 |
| SNA3 | 2007 | 238 | 12 | 58 | 32.324 | F | 0.500 | -0.415 |
| HELL | 2007 | 238 | 12 | 58 | 32.590 | F | 0.500 | -1.307 |
| YO11 | 2007 | 238 | 12 | 58 | 39.274 | F | 0.500 | 0.062  |
| CMB  | 2007 | 238 | 12 | 58 | 32.481 | F | 0.500 | -0.268 |
| YO07 | 2007 | 238 | 12 | 58 | 37.401 | F | 0.500 | -0.057 |
| YO09 | 2007 | 238 | 12 | 58 | 38.117 | F | 0.500 | -0.079 |
| SNE5 | 2007 | 238 | 12 | 58 | 35.637 | F | 0.500 | -0.957 |
| SN64 | 2007 | 238 | 12 | 58 | 36.969 | F | 0.500 | -0.335 |
| YO08 | 2007 | 238 | 12 | 58 | 37.600 | F | 0.500 | -0.187 |
| SN63 | 2007 | 238 | 12 | 58 | 34.815 | F | 0.500 | -0.362 |
| YO06 | 2007 | 238 | 12 | 58 | 37.151 | F | 0.500 | -0.284 |
| T06C | 2007 | 238 | 12 | 58 | 30.355 | F | 0.500 | -0.503 |
| LAVA | 2007 | 238 | 12 | 58 | 34.667 | F | 0.500 | -0.357 |
| YO05 | 2007 | 238 | 12 | 58 | 36.599 | F | 0.500 | -0.339 |
| SNE4 | 2007 | 238 | 12 | 58 | 33.746 | F | 0.500 | -0.297 |
| KCC  | 2007 | 238 | 12 | 58 | 35.746 | F | 0.500 | -0.134 |
| S06C | 2007 | 238 | 12 | 58 | 35.216 | F | 0.500 | -0.676 |
| SNA4 | 2007 | 238 | 12 | 58 | 34.421 | F | 0.500 | -0.439 |
| YO04 | 2007 | 238 | 12 | 58 | 36.229 | F | 0.500 | -0.367 |
| YO01 | 2007 | 238 | 12 | 58 | 35.217 | F | 0.500 | -0.184 |
| YO03 | 2007 | 238 | 12 | 58 | 35.921 | F | 0.500 | -0.223 |
| YO02 | 2007 | 238 | 12 | 58 | 35.638 | F | 0.500 | -0.278 |
| ORV  | 2007 | 238 | 12 | 58 | 34.784 | F | 0.500 | -0.403 |
| S09A | 2007 | 238 | 12 | 58 | 53.782 | F | 0.500 | 0.427  |

|      |      |     |    |         |          |           |         |        |       |
|------|------|-----|----|---------|----------|-----------|---------|--------|-------|
| 2007 | 203  | 10  | 49 | 39.3289 | -2.79700 | 141.66000 | 10.0000 | 66     | 4.019 |
| MPM  | 2007 | 203 | 11 | 14      | 7.176    | F         | 0.500   | 0.964  |       |
| K08A | 2007 | 203 | 11 | 13      | 59.039   | F         | 0.500   | -0.381 |       |
| SNB5 | 2007 | 203 | 11 | 13      | 52.619   | F         | 0.500   | -0.285 |       |
| O04C | 2007 | 203 | 11 | 13      | 49.101   | F         | 0.500   | -1.372 |       |
| SNG5 | 2007 | 203 | 11 | 13      | 46.965   | F         | 0.500   | -1.545 |       |
| O10A | 2007 | 203 | 11 | 14      | 8.453    | F         | 0.500   | 0.561  |       |
| L07A | 2007 | 203 | 11 | 13      | 57.281   | F         | 0.500   | 0.486  |       |
| PLM  | 2007 | 203 | 11 | 14      | 10.833   | F         | 0.500   | 1.093  |       |



|      |      |     |    |    |        |   |       |        |
|------|------|-----|----|----|--------|---|-------|--------|
| BFS  | 2007 | 203 | 11 | 14 | 5.690  | F | 0.500 | -0.358 |
| SNB6 | 2007 | 203 | 11 | 13 | 54.338 | F | 0.500 | -0.005 |
| BBR  | 2007 | 203 | 11 | 14 | 9.110  | F | 0.500 | -0.316 |
| U10A | 2007 | 203 | 11 | 14 | 13.205 | F | 0.500 | 2.998  |
| SN97 | 2007 | 203 | 11 | 13 | 56.201 | F | 0.500 | 0.139  |
| O09A | 2007 | 203 | 11 | 14 | 5.782  | F | 0.500 | 0.519  |
| SND8 | 2007 | 203 | 11 | 13 | 53.546 | F | 0.500 | -0.458 |
| ISA  | 2007 | 203 | 11 | 14 | 1.318  | F | 0.500 | -0.806 |
| HEC  | 2007 | 203 | 11 | 14 | 12.448 | F | 0.500 | 1.435  |
| FUR  | 2007 | 203 | 11 | 14 | 9.601  | F | 0.500 | 1.684  |
| N08A | 2007 | 203 | 11 | 14 | 1.755  | F | 0.500 | 0.109  |
| K07A | 2007 | 203 | 11 | 13 | 56.687 | F | 0.500 | 0.087  |
| R08A | 2007 | 203 | 11 | 14 | 4.498  | F | 0.500 | 1.810  |
| K09A | 2007 | 203 | 11 | 14 | 2.073  | F | 0.500 | -0.239 |
| SND7 | 2007 | 203 | 11 | 13 | 52.153 | F | 0.500 | -0.521 |
| SN63 | 2007 | 203 | 11 | 13 | 55.695 | F | 0.500 | -0.764 |
| SN96 | 2007 | 203 | 11 | 13 | 55.229 | F | 0.500 | -0.247 |
| SNE9 | 2007 | 203 | 11 | 13 | 53.589 | F | 0.500 | -0.756 |
| LRL  | 2007 | 203 | 11 | 14 | 6.541  | F | 0.500 | 0.995  |
| SNF6 | 2007 | 203 | 11 | 13 | 48.954 | F | 0.500 | -1.687 |
| SNE6 | 2007 | 203 | 11 | 13 | 50.644 | F | 0.500 | -1.165 |
| J10A | 2007 | 203 | 11 | 14 | 4.853  | F | 0.500 | -0.372 |
| WCN  | 2007 | 203 | 11 | 13 | 57.063 | F | 0.500 | 1.058  |
| SNC6 | 2007 | 203 | 11 | 13 | 52.943 | F | 0.500 | -0.505 |
| SHO  | 2007 | 203 | 11 | 14 | 12.878 | F | 0.500 | 2.107  |
| YO09 | 2007 | 203 | 11 | 13 | 58.159 | F | 0.500 | 0.279  |
| EDW2 | 2007 | 203 | 11 | 14 | 4.987  | F | 0.500 | 0.681  |
| LAVA | 2007 | 203 | 11 | 13 | 51.584 | F | 0.500 | -0.479 |
| SNC7 | 2007 | 203 | 11 | 13 | 53.593 | F | 0.500 | -0.090 |
| SND4 | 2007 | 203 | 11 | 13 | 49.681 | F | 0.500 | -0.638 |
| ORV  | 2007 | 203 | 11 | 13 | 47.675 | F | 0.500 | -1.248 |
| YO08 | 2007 | 203 | 11 | 13 | 57.734 | F | 0.500 | -0.029 |
| YO02 | 2007 | 203 | 11 | 13 | 56.096 | F | 0.500 | -0.531 |
| DGR  | 2007 | 203 | 11 | 14 | 9.717  | F | 0.500 | 1.032  |
| YO01 | 2007 | 203 | 11 | 13 | 55.852 | F | 0.500 | -0.664 |
| YO04 | 2007 | 203 | 11 | 13 | 56.574 | F | 0.500 | -0.440 |
| K10A | 2007 | 203 | 11 | 14 | 5.760  | F | 0.500 | 0.407  |
| YO06 | 2007 | 203 | 11 | 13 | 57.246 | F | 0.500 | -0.077 |
| SNB3 | 2007 | 203 | 11 | 13 | 50.570 | F | 0.500 | -0.580 |
| SNE4 | 2007 | 203 | 11 | 13 | 48.502 | F | 0.500 | -0.730 |
| GSC  | 2007 | 203 | 11 | 14 | 10.819 | F | 0.500 | 1.771  |
| YO03 | 2007 | 203 | 11 | 13 | 56.294 | F | 0.500 | -0.374 |
| SNA4 | 2007 | 203 | 11 | 13 | 52.711 | F | 0.500 | -0.239 |
| HELL | 2007 | 203 | 11 | 13 | 58.617 | F | 0.500 | -1.174 |
| SN64 | 2007 | 203 | 11 | 13 | 57.014 | F | 0.500 | -0.223 |
| N09A | 2007 | 203 | 11 | 14 | 3.895  | F | 0.500 | -0.032 |
| Q08A | 2007 | 203 | 11 | 14 | 4.182  | F | 0.500 | 0.744  |
| SN93 | 2007 | 203 | 11 | 13 | 52.443 | F | 0.500 | -0.208 |
| YO07 | 2007 | 203 | 11 | 13 | 57.544 | F | 0.500 | 0.151  |
| CMB  | 2007 | 203 | 11 | 13 | 53.046 | F | 0.500 | -0.518 |
| SNC5 | 2007 | 203 | 11 | 13 | 51.466 | F | 0.500 | -0.507 |
| L10A | 2007 | 203 | 11 | 14 | 7.239  | F | 0.500 | -0.044 |
| SND5 | 2007 | 203 | 11 | 13 | 50.370 | F | 0.500 | -0.829 |
| R09A | 2007 | 203 | 11 | 14 | 8.512  | F | 0.500 | 1.530  |
| PASC | 2007 | 203 | 11 | 14 | 2.528  | F | 0.500 | -1.209 |

|      |      |     |    |         |         |           |         |        |       |
|------|------|-----|----|---------|---------|-----------|---------|--------|-------|
| 2007 | 207  | 5   | 40 | 24.4034 | 2.87200 | 127.46400 | 25.0000 | 67     | 8.303 |
| YO08 | 2007 | 207 | 6  | 5       | 14.167  | F         | 0.500   | 0.789  |       |
| ADO  | 2007 | 207 | 6  | 5       | 25.440  | F         | 0.500   | 1.317  |       |
| MWC  | 2007 | 207 | 6  | 5       | 23.257  | F         | 0.500   | 0.664  |       |
| SVD  | 2007 | 207 | 6  | 5       | 27.612  | F         | 0.500   | 1.933  |       |
| BDM  | 2007 | 207 | 6  | 5       | 4.483   | F         | 0.500   | -0.800 |       |
| V05C | 2007 | 207 | 6  | 5       | 14.827  | F         | 0.500   | 1.177  |       |

|      |      |     |   |   |        |   |       |        |
|------|------|-----|---|---|--------|---|-------|--------|
| DJJ  | 2007 | 207 | 6 | 5 | 21.408 | F | 0.500 | 0.610  |
| DEC  | 2007 | 207 | 6 | 5 | 21.790 | F | 0.500 | 0.584  |
| FARB | 2007 | 207 | 6 | 4 | 59.048 | F | 0.500 | -2.433 |
| HUMO | 2007 | 207 | 6 | 4 | 54.281 | F | 0.500 | -1.590 |
| RRX  | 2007 | 207 | 6 | 5 | 27.024 | F | 0.500 | 2.262  |
| PIN  | 2007 | 207 | 6 | 4 | 59.836 | F | 0.500 | -1.419 |
| HATC | 2007 | 207 | 6 | 5 | 2.034  | F | 0.500 | -1.282 |
| LGU  | 2007 | 207 | 6 | 5 | 18.878 | F | 0.500 | -0.160 |
| PLM  | 2007 | 207 | 6 | 5 | 30.582 | F | 0.500 | 3.003  |
| I03A | 2007 | 207 | 6 | 4 | 51.510 | F | 0.500 | -1.348 |
| LRL  | 2007 | 207 | 6 | 5 | 24.040 | F | 0.500 | 2.026  |
| YBH  | 2007 | 207 | 6 | 4 | 56.463 | F | 0.500 | -1.271 |
| MUR  | 2007 | 207 | 6 | 5 | 28.076 | F | 0.500 | 2.320  |
| I04A | 2007 | 207 | 6 | 4 | 53.394 | F | 0.500 | -2.596 |
| U10A | 2007 | 207 | 6 | 5 | 28.717 | F | 0.500 | 3.728  |
| SHO  | 2007 | 207 | 6 | 5 | 29.237 | F | 0.500 | 3.290  |
| K06A | 2007 | 207 | 6 | 5 | 3.386  | F | 0.500 | -1.177 |
| M02C | 2007 | 207 | 6 | 4 | 57.012 | F | 0.500 | -0.666 |
| CHF  | 2007 | 207 | 6 | 5 | 23.588 | F | 0.500 | 1.230  |
| DGR  | 2007 | 207 | 6 | 5 | 28.835 | F | 0.500 | 2.512  |
| V04C | 2007 | 207 | 6 | 5 | 11.667 | F | 0.500 | 0.986  |
| M04C | 2007 | 207 | 6 | 4 | 59.165 | F | 0.500 | -1.583 |
| SNG5 | 2007 | 207 | 6 | 5 | 1.514  | F | 0.500 | -2.735 |
| PASC | 2007 | 207 | 6 | 5 | 22.643 | F | 0.500 | 0.929  |
| SMM  | 2007 | 207 | 6 | 5 | 15.483 | F | 0.500 | 1.181  |
| CVS  | 2007 | 207 | 6 | 5 | 1.393  | F | 0.500 | -1.554 |
| GSC  | 2007 | 207 | 6 | 5 | 28.352 | F | 0.500 | 3.219  |
| SLA  | 2007 | 207 | 6 | 5 | 24.831 | F | 0.500 | 1.847  |
| O02C | 2007 | 207 | 6 | 4 | 59.441 | F | 0.500 | -0.242 |
| SNE4 | 2007 | 207 | 6 | 5 | 3.683  | F | 0.500 | -1.650 |
| OSI  | 2007 | 207 | 6 | 5 | 20.478 | F | 0.500 | 0.834  |
| M03C | 2007 | 207 | 6 | 4 | 58.532 | F | 0.500 | -2.010 |
| V03C | 2007 | 207 | 6 | 5 | 9.334  | F | 0.500 | 0.448  |
| P09A | 2007 | 207 | 6 | 5 | 18.930 | F | 0.500 | 0.396  |
| MPP  | 2007 | 207 | 6 | 5 | 17.164 | F | 0.500 | 1.520  |
| FUR  | 2007 | 207 | 6 | 5 | 25.784 | F | 0.500 | 2.839  |
| L04A | 2007 | 207 | 6 | 4 | 57.988 | F | 0.500 | -2.016 |
| ISA  | 2007 | 207 | 6 | 5 | 19.077 | F | 0.500 | 0.105  |
| J04A | 2007 | 207 | 6 | 4 | 56.067 | F | 0.500 | -2.141 |
| BNLO | 2007 | 207 | 6 | 5 | 3.340  | F | 0.500 | -1.982 |
| WDC  | 2007 | 207 | 6 | 4 | 58.289 | F | 0.500 | -1.332 |
| SNF6 | 2007 | 207 | 6 | 5 | 3.782  | F | 0.500 | -2.312 |
| L05A | 2007 | 207 | 6 | 5 | 2.632  | F | 0.500 | -1.355 |
| L02A | 2007 | 207 | 6 | 4 | 53.769 | F | 0.500 | -0.490 |
| CWC  | 2007 | 207 | 6 | 5 | 20.790 | F | 0.500 | 1.020  |
| MPM  | 2007 | 207 | 6 | 5 | 24.382 | F | 0.500 | 2.252  |
| HOPS | 2007 | 207 | 6 | 4 | 59.933 | F | 0.500 | -0.069 |
| RCT  | 2007 | 207 | 6 | 5 | 14.826 | F | 0.500 | -0.538 |
| ORV  | 2007 | 207 | 6 | 5 | 2.562  | F | 0.500 | -2.304 |
| SNE7 | 2007 | 207 | 6 | 5 | 5.340  | F | 0.500 | -1.806 |
| SNG7 | 2007 | 207 | 6 | 5 | 3.062  | F | 0.500 | -2.510 |
| K02A | 2007 | 207 | 6 | 4 | 52.837 | F | 0.500 | -0.890 |
| Q09A | 2007 | 207 | 6 | 5 | 20.552 | F | 0.500 | 1.311  |
| Q08A | 2007 | 207 | 6 | 5 | 18.466 | F | 0.500 | 1.403  |
| M05C | 2007 | 207 | 6 | 5 | 2.567  | F | 0.500 | -1.291 |
| SNE5 | 2007 | 207 | 6 | 5 | 4.171  | F | 0.500 | -2.086 |
| SN98 | 2007 | 207 | 6 | 5 | 12.843 | F | 0.500 | 0.986  |
| SND4 | 2007 | 207 | 6 | 5 | 4.783  | F | 0.500 | -1.745 |
| S09A | 2007 | 207 | 6 | 5 | 23.037 | F | 0.500 | 2.289  |
| SNF8 | 2007 | 207 | 6 | 5 | 5.412  | F | 0.500 | -2.003 |
| SNC3 | 2007 | 207 | 6 | 5 | 5.156  | F | 0.500 | -1.371 |
| HELL | 2007 | 207 | 6 | 5 | 15.953 | F | 0.500 | -0.109 |
| J05A | 2007 | 207 | 6 | 4 | 59.452 | F | 0.500 | -1.247 |

|      |      |     |   |   |        |   |       |        |
|------|------|-----|---|---|--------|---|-------|--------|
| SND9 | 2007 | 207 | 6 | 5 | 8.648  | F | 0.500 | -0.271 |
| O05C | 2007 | 207 | 6 | 5 | 4.054  | F | 0.500 | -1.909 |
| R06C | 2007 | 207 | 6 | 5 | 13.555 | F | 0.500 | 1.141  |
| YO09 | 2007 | 207 | 6 | 5 | 14.456 | F | 0.500 | 0.996  |
| GASB | 2007 | 207 | 6 | 5 | 0.677  | F | 0.500 | 0.068  |
| N08A | 2007 | 207 | 6 | 5 | 13.703 | F | 0.500 | 0.129  |
| N02C | 2007 | 207 | 6 | 4 | 56.515 | F | 0.500 | -0.246 |
| SN97 | 2007 | 207 | 6 | 5 | 11.248 | F | 0.500 | 0.374  |
| SN93 | 2007 | 207 | 6 | 5 | 8.262  | F | 0.500 | -0.255 |
| YO07 | 2007 | 207 | 6 | 5 | 13.942 | F | 0.500 | 0.910  |
| O07A | 2007 | 207 | 6 | 5 | 11.890 | F | 0.500 | -0.128 |
| YO11 | 2007 | 207 | 6 | 5 | 15.146 | F | 0.500 | 1.582  |
| M09A | 2007 | 207 | 6 | 5 | 15.077 | F | 0.500 | 0.194  |
| N07B | 2007 | 207 | 6 | 5 | 10.487 | F | 0.500 | -0.382 |
| SNE6 | 2007 | 207 | 6 | 5 | 5.417  | F | 0.500 | -1.938 |
| SND5 | 2007 | 207 | 6 | 5 | 5.442  | F | 0.500 | -1.630 |
| SN55 | 2007 | 207 | 6 | 5 | 15.683 | F | 0.500 | 1.772  |
| LAVA | 2007 | 207 | 6 | 5 | 6.996  | F | 0.500 | -0.551 |
| O09A | 2007 | 207 | 6 | 5 | 17.894 | F | 0.500 | 0.728  |
| SNC5 | 2007 | 207 | 6 | 5 | 6.603  | F | 0.500 | -1.300 |
| YO06 | 2007 | 207 | 6 | 5 | 13.729 | F | 0.500 | 0.753  |
| YO03 | 2007 | 207 | 6 | 5 | 12.964 | F | 0.500 | 0.553  |
| SN64 | 2007 | 207 | 6 | 5 | 13.553 | F | 0.500 | 0.646  |
| SNA3 | 2007 | 207 | 6 | 5 | 7.619  | F | 0.500 | -0.324 |
| SNE9 | 2007 | 207 | 6 | 5 | 7.448  | F | 0.500 | -0.724 |
| J10A | 2007 | 207 | 6 | 5 | 13.563 | F | 0.500 | -0.179 |
| YO04 | 2007 | 207 | 6 | 5 | 13.048 | F | 0.500 | 0.309  |
| SND7 | 2007 | 207 | 6 | 5 | 6.582  | F | 0.500 | -1.351 |
| SNB6 | 2007 | 207 | 6 | 5 | 9.376  | F | 0.500 | -0.047 |
| YO02 | 2007 | 207 | 6 | 5 | 12.748 | F | 0.500 | 0.361  |
| WCN  | 2007 | 207 | 6 | 5 | 11.197 | F | 0.500 | 0.848  |
| L10A | 2007 | 207 | 6 | 5 | 17.711 | F | 0.500 | 0.734  |
| O06A | 2007 | 207 | 6 | 5 | 8.546  | F | 0.500 | -0.360 |
| SN96 | 2007 | 207 | 6 | 5 | 10.898 | F | 0.500 | 0.120  |
| YO05 | 2007 | 207 | 6 | 5 | 12.994 | F | 0.500 | 0.143  |
| O08A | 2007 | 207 | 6 | 5 | 14.775 | F | 0.500 | 0.538  |
| SND8 | 2007 | 207 | 6 | 5 | 8.017  | F | 0.500 | -0.282 |
| YO01 | 2007 | 207 | 6 | 5 | 12.591 | F | 0.500 | 0.207  |
| N09A | 2007 | 207 | 6 | 5 | 15.813 | F | 0.500 | 0.505  |
| SNA4 | 2007 | 207 | 6 | 5 | 8.307  | F | 0.500 | -0.233 |
| HAST | 2007 | 207 | 6 | 5 | 7.045  | F | 0.500 | -0.485 |
| SNB9 | 2007 | 207 | 6 | 5 | 11.742 | F | 0.500 | 0.930  |
| SNB5 | 2007 | 207 | 6 | 5 | 8.043  | F | 0.500 | -0.126 |
| SN63 | 2007 | 207 | 6 | 5 | 12.349 | F | 0.500 | 0.005  |
| N06A | 2007 | 207 | 6 | 5 | 7.589  | F | 0.500 | -0.543 |
| SNC6 | 2007 | 207 | 6 | 5 | 8.091  | F | 0.500 | -0.342 |
| I09A | 2007 | 207 | 6 | 5 | 9.739  | F | 0.500 | -0.308 |
| M08A | 2007 | 207 | 6 | 5 | 11.325 | F | 0.500 | -0.594 |
| SNA7 | 2007 | 207 | 6 | 5 | 10.849 | F | 0.500 | 0.449  |
| WVOR | 2007 | 207 | 6 | 5 | 9.563  | F | 0.500 | 0.094  |
| K11A | 2007 | 207 | 6 | 5 | 18.315 | F | 0.500 | 1.447  |
| U04C | 2007 | 207 | 6 | 5 | 10.596 | F | 0.500 | 0.312  |
| SNB7 | 2007 | 207 | 6 | 5 | 9.678  | F | 0.500 | 0.146  |
| SNC7 | 2007 | 207 | 6 | 5 | 8.260  | F | 0.500 | -0.148 |
| CMB  | 2007 | 207 | 6 | 5 | 9.599  | F | 0.500 | 0.096  |
| L09A | 2007 | 207 | 6 | 5 | 13.477 | F | 0.500 | 0.208  |
| R05C | 2007 | 207 | 6 | 5 | 10.543 | F | 0.500 | 0.338  |
| L08A | 2007 | 207 | 6 | 5 | 10.928 | F | 0.500 | 0.127  |

1997 161 21 54 3.1811 -35.81500 -108.13500 10.0000

1 8.161

|     |      |     |    |    |        |   |       |        |
|-----|------|-----|----|----|--------|---|-------|--------|
| GSC | 1997 | 161 | 22 | 14 | 39.997 | S | 0.500 | 0.234  |
| DGR | 1997 | 161 | 22 | 14 | 22.205 | S | 0.500 | 1.231  |
| WMD | 1997 | 161 | 22 | 14 | 52.203 | S | 0.500 | -0.447 |

|      |      |     |    |    |        |   |       |        |
|------|------|-----|----|----|--------|---|-------|--------|
| BMN  | 1997 | 161 | 22 | 15 | 36.299 | S | 0.500 | -0.919 |
| BPC  | 1997 | 161 | 22 | 15 | 3.991  | S | 0.500 | 1.010  |
| DAC  | 1997 | 161 | 22 | 14 | 52.920 | S | 0.500 | 0.954  |
| SRF  | 1997 | 161 | 22 | 15 | 0.004  | S | 0.500 | -0.317 |
| BGR  | 1997 | 161 | 22 | 14 | 55.424 | S | 0.500 | -2.172 |
| CPR  | 1997 | 161 | 22 | 14 | 57.783 | S | 0.500 | -1.333 |
| LMC  | 1997 | 161 | 22 | 14 | 52.410 | S | 0.500 | -2.059 |
| SFT  | 1997 | 161 | 22 | 14 | 53.210 | S | 0.500 | 1.093  |
| TPH  | 1997 | 161 | 22 | 15 | 12.257 | S | 0.500 | 0.784  |
| WHP  | 1997 | 161 | 22 | 14 | 56.560 | S | 0.500 | 0.103  |
| OVY  | 1997 | 161 | 22 | 14 | 59.128 | S | 0.500 | 0.258  |
| TPNV | 1997 | 161 | 22 | 14 | 59.109 | S | 0.500 | 1.405  |
| HVY  | 1997 | 161 | 22 | 14 | 57.070 | S | 0.500 | -1.746 |
| ARC2 | 1997 | 161 | 22 | 14 | 50.598 | S | 0.500 | 0.450  |
| CMB  | 1997 | 161 | 22 | 15 | 16.951 | S | 0.500 | 1.470  |

|      |      |     |    |         |          |            |         |        |       |
|------|------|-----|----|---------|----------|------------|---------|--------|-------|
| 1997 | 168  | 21  | 3  | 44.5070 | 51.34700 | -179.33200 | 33.0000 | 2      | 4.247 |
| HVY  | 1997 | 168 | 21 | 18      | 22.970   | S          | 0.500   | -0.215 |       |
| GSC  | 1997 | 168 | 21 | 18      | 57.659   | S          | 0.500   | -1.143 |       |
| WVOR | 1997 | 168 | 21 | 17      | 40.242   | S          | 0.500   | 0.883  |       |
| BMN  | 1997 | 168 | 21 | 18      | 8.600    | S          | 0.500   | -0.771 |       |
| SRF  | 1997 | 168 | 21 | 18      | 32.884   | S          | 0.500   | 0.397  |       |
| WHP  | 1997 | 168 | 21 | 18      | 34.670   | S          | 0.500   | -0.067 |       |
| OVY  | 1997 | 168 | 21 | 18      | 31.931   | S          | 0.500   | -0.059 |       |
| CPR  | 1997 | 168 | 21 | 18      | 27.924   | S          | 0.500   | -1.477 |       |
| PFO  | 1997 | 168 | 21 | 19      | 17.427   | S          | 0.500   | -0.348 |       |
| DP00 | 1997 | 168 | 21 | 18      | 43.080   | S          | 0.500   | 0.415  |       |
| MNV  | 1997 | 168 | 21 | 18      | 18.793   | S          | 0.500   | 0.380  |       |
| DAC  | 1997 | 168 | 21 | 18      | 42.612   | S          | 0.500   | -0.519 |       |
| CMB  | 1997 | 168 | 21 | 18      | 2.693    | S          | 0.500   | 1.248  |       |
| BPC  | 1997 | 168 | 21 | 18      | 29.309   | S          | 0.500   | 1.470  |       |
| CHP  | 1997 | 168 | 21 | 18      | 41.624   | S          | 0.500   | -0.622 |       |
| VTV  | 1997 | 168 | 21 | 19      | 0.667    | S          | 0.500   | -0.291 |       |
| DGR  | 1997 | 168 | 21 | 19      | 11.896   | S          | 0.500   | -0.370 |       |
| FLL  | 1997 | 168 | 21 | 18      | 22.637   | S          | 0.500   | 1.087  |       |

|      |      |     |    |         |           |            |         |        |       |
|------|------|-----|----|---------|-----------|------------|---------|--------|-------|
| 1997 | 176  | 3   | 54 | 17.1993 | -16.01800 | -173.04700 | 33.0000 | 3      | 4.959 |
| CWC  | 1997 | 176 | 4  | 15      | 16.481    | S          | 0.500   | 0.516  |       |
| VTV  | 1997 | 176 | 4  | 15      | 9.166     | S          | 0.500   | -0.157 |       |
| GSC  | 1997 | 176 | 4  | 15      | 18.804    | S          | 0.500   | 0.741  |       |
| WHP  | 1997 | 176 | 4  | 15      | 15.192    | S          | 0.500   | -0.782 |       |
| SRF  | 1997 | 176 | 4  | 15      | 18.793    | S          | 0.500   | -0.027 |       |
| SFK  | 1997 | 176 | 4  | 15      | 8.538     | S          | 0.500   | -0.933 |       |
| OVY  | 1997 | 176 | 4  | 15      | 16.083    | S          | 0.500   | -0.328 |       |
| BGR  | 1997 | 176 | 4  | 15      | 8.572     | S          | 0.500   | -1.268 |       |
| SMD  | 1997 | 176 | 4  | 15      | 14.619    | S          | 0.500   | -0.434 |       |
| CPR  | 1997 | 176 | 4  | 15      | 12.930    | S          | 0.500   | -1.554 |       |
| CMB  | 1997 | 176 | 4  | 15      | 10.325    | S          | 0.500   | 1.222  |       |
| HVY  | 1997 | 176 | 4  | 15      | 7.528     | S          | 0.500   | -0.493 |       |
| JUN  | 1997 | 176 | 4  | 15      | 13.841    | S          | 0.500   | -0.705 |       |
| DP00 | 1997 | 176 | 4  | 15      | 19.143    | S          | 0.500   | 1.220  |       |
| BPC  | 1997 | 176 | 4  | 15      | 19.208    | S          | 0.500   | 1.426  |       |
| FLL  | 1997 | 176 | 4  | 15      | 15.448    | S          | 0.500   | 0.796  |       |
| CHP  | 1997 | 176 | 4  | 15      | 13.268    | S          | 0.500   | 0.761  |       |

|      |      |     |    |         |         |           |         |        |         |
|------|------|-----|----|---------|---------|-----------|---------|--------|---------|
| 1997 | 177  | 6   | 11 | 46.9488 | 4.86800 | -82.61100 | 10.0000 | 4      | -23.431 |
| HVY  | 1997 | 177 | 6  | 26      | 56.913  | S         | 0.500   | -2.103 |         |
| CMB  | 1997 | 177 | 6  | 27      | 18.845  | S         | 0.500   | -1.096 |         |
| FLL  | 1997 | 177 | 6  | 27      | 0.937   | S         | 0.500   | -0.055 |         |
| PFO  | 1997 | 177 | 6  | 26      | 6.736   | S         | 0.500   | 0.871  |         |
| VTV  | 1997 | 177 | 6  | 26      | 22.815  | S         | 0.500   | 0.415  |         |
| CHP  | 1997 | 177 | 6  | 26      | 41.995  | S         | 0.500   | 0.798  |         |
| GSC  | 1997 | 177 | 6  | 26      | 24.524  | S         | 0.500   | 1.041  |         |

|      |      |     |   |    |        |   |       |        |
|------|------|-----|---|----|--------|---|-------|--------|
| BGR  | 1997 | 177 | 6 | 26 | 54.529 | S | 0.500 | -1.131 |
| SFK  | 1997 | 177 | 6 | 26 | 50.605 | S | 0.500 | -1.056 |
| OVY  | 1997 | 177 | 6 | 26 | 50.373 | S | 0.500 | -0.580 |
| SFT  | 1997 | 177 | 6 | 26 | 43.078 | S | 0.500 | -0.444 |
| BPC  | 1997 | 177 | 6 | 26 | 56.825 | S | 0.500 | 2.160  |
| CWC  | 1997 | 177 | 6 | 26 | 47.253 | S | 0.500 | 1.825  |
| DP00 | 1997 | 177 | 6 | 26 | 41.390 | S | 0.500 | 1.531  |
| SMD  | 1997 | 177 | 6 | 26 | 54.621 | S | 0.500 | -0.469 |
| JUN  | 1997 | 177 | 6 | 26 | 49.560 | S | 0.500 | -0.390 |
| CPR  | 1997 | 177 | 6 | 26 | 51.760 | S | 0.500 | -1.315 |

|      |     |   |    |         |          |           |         |   |       |
|------|-----|---|----|---------|----------|-----------|---------|---|-------|
| 1997 | 178 | 4 | 39 | 59.4097 | 38.33400 | -26.68400 | 10.0000 | 5 | 6.690 |
|------|-----|---|----|---------|----------|-----------|---------|---|-------|

|      |      |     |   |   |        |   |       |        |
|------|------|-----|---|---|--------|---|-------|--------|
| VTV  | 1997 | 178 | 5 | 0 | 23.106 | S | 0.500 | 0.158  |
| WMD  | 1997 | 178 | 5 | 0 | 22.052 | S | 0.500 | -0.548 |
| WHP  | 1997 | 178 | 5 | 0 | 17.283 | S | 0.500 | 0.002  |
| GSC  | 1997 | 178 | 5 | 0 | 14.945 | S | 0.500 | 1.121  |
| SMD  | 1997 | 178 | 5 | 0 | 18.203 | S | 0.500 | 0.118  |
| CPR  | 1997 | 178 | 5 | 0 | 18.047 | S | 0.500 | -0.489 |
| FLL  | 1997 | 178 | 5 | 0 | 19.604 | S | 0.500 | 0.712  |
| CHP  | 1997 | 178 | 5 | 0 | 20.727 | S | 0.500 | 0.008  |
| CMB  | 1997 | 178 | 5 | 0 | 24.362 | S | 0.500 | -0.231 |
| JUN  | 1997 | 178 | 5 | 0 | 18.983 | S | 0.500 | 0.097  |
| DP00 | 1997 | 178 | 5 | 0 | 14.973 | S | 0.500 | 0.217  |
| BGR  | 1997 | 178 | 5 | 0 | 22.108 | S | 0.500 | -0.959 |
| PFO  | 1997 | 178 | 5 | 0 | 23.045 | S | 0.500 | 1.215  |
| SFK  | 1997 | 178 | 5 | 0 | 22.714 | S | 0.500 | -0.402 |
| HVY  | 1997 | 178 | 5 | 0 | 23.552 | S | 0.500 | -1.019 |

|      |     |    |    |         |          |            |        |   |       |
|------|-----|----|----|---------|----------|------------|--------|---|-------|
| 1997 | 181 | 15 | 47 | 43.3411 | 19.35800 | -155.06799 | 7.5000 | 6 | 3.841 |
|------|-----|----|----|---------|----------|------------|--------|---|-------|

|      |      |     |    |   |        |   |       |        |
|------|------|-----|----|---|--------|---|-------|--------|
| CHP  | 1997 | 181 | 16 | 0 | 31.165 | S | 0.500 | -0.169 |
| VTV  | 1997 | 181 | 16 | 0 | 33.823 | S | 0.500 | -0.803 |
| TWR2 | 1997 | 181 | 16 | 0 | 28.654 | S | 0.500 | -0.914 |
| SFT  | 1997 | 181 | 16 | 0 | 33.226 | S | 0.500 | 0.140  |
| WHP  | 1997 | 181 | 16 | 0 | 32.879 | S | 0.500 | -0.104 |
| MLAC | 1997 | 181 | 16 | 0 | 33.401 | S | 0.500 | 2.497  |
| FLL  | 1997 | 181 | 16 | 0 | 28.209 | S | 0.500 | 0.642  |
| TPNV | 1997 | 181 | 16 | 0 | 57.511 | S | 0.500 | 0.170  |
| TPH  | 1997 | 181 | 16 | 0 | 52.296 | S | 0.500 | 0.890  |
| SRF  | 1997 | 181 | 16 | 0 | 36.423 | S | 0.500 | 0.573  |
| WMD  | 1997 | 181 | 16 | 0 | 26.213 | S | 0.500 | -0.917 |
| BPC  | 1997 | 181 | 16 | 0 | 34.364 | S | 0.500 | 1.232  |
| LMC  | 1997 | 181 | 16 | 0 | 20.504 | S | 0.500 | -1.417 |
| CPR  | 1997 | 181 | 16 | 0 | 28.412 | S | 0.500 | -1.200 |
| GSC  | 1997 | 181 | 16 | 0 | 44.880 | S | 0.500 | 0.928  |
| JUN  | 1997 | 181 | 16 | 0 | 30.438 | S | 0.500 | -0.276 |
| SFK  | 1997 | 181 | 16 | 0 | 23.049 | S | 0.500 | -1.538 |
| DP00 | 1997 | 181 | 16 | 0 | 38.641 | S | 0.500 | 0.545  |
| HVY  | 1997 | 181 | 16 | 0 | 19.271 | S | 0.500 | -1.172 |
| CMB  | 1997 | 181 | 16 | 0 | 15.640 | S | 0.500 | 0.405  |
| DAC  | 1997 | 181 | 16 | 0 | 38.991 | S | 0.500 | 0.298  |
| SMD  | 1997 | 181 | 16 | 0 | 29.988 | S | 0.500 | 0.192  |

|      |     |    |    |         |          |           |         |   |       |
|------|-----|----|----|---------|----------|-----------|---------|---|-------|
| 1997 | 181 | 18 | 56 | 33.7203 | -4.16100 | -80.92600 | 33.0000 | 7 | 6.240 |
|------|-----|----|----|---------|----------|-----------|---------|---|-------|

|     |      |     |    |    |        |   |       |        |
|-----|------|-----|----|----|--------|---|-------|--------|
| LMC | 1997 | 181 | 19 | 13 | 24.596 | S | 0.500 | -1.176 |
| SFT | 1997 | 181 | 19 | 13 | 18.070 | S | 0.500 | 1.033  |
| BPC | 1997 | 181 | 19 | 13 | 29.512 | S | 0.500 | 1.235  |
| CMB | 1997 | 181 | 19 | 13 | 51.306 | S | 0.500 | -0.372 |
| OVY | 1997 | 181 | 19 | 13 | 24.397 | S | 0.500 | -0.066 |
| SRF | 1997 | 181 | 19 | 13 | 24.214 | S | 0.500 | 0.364  |
| GSC | 1997 | 181 | 19 | 12 | 58.963 | S | 0.500 | 0.908  |
| JUN | 1997 | 181 | 19 | 13 | 23.920 | S | 0.500 | 0.685  |
| WMD | 1997 | 181 | 19 | 13 | 21.617 | S | 0.500 | 0.340  |
| PFO | 1997 | 181 | 19 | 12 | 41.329 | S | 0.500 | 1.633  |

|      |      |     |    |    |          |       |        |
|------|------|-----|----|----|----------|-------|--------|
| DP00 | 1997 | 181 | 19 | 13 | 15.584 S | 0.500 | 1.619  |
| BGR  | 1997 | 181 | 19 | 13 | 27.164 S | 0.500 | -1.057 |
| SMD  | 1997 | 181 | 19 | 13 | 28.079 S | 0.500 | -0.292 |
| SFK  | 1997 | 181 | 19 | 13 | 24.185 S | 0.500 | -0.100 |
| HVY  | 1997 | 181 | 19 | 13 | 29.664 S | 0.500 | -1.591 |
| BMN  | 1997 | 181 | 19 | 13 | 46.959 S | 0.500 | -1.633 |
| WVOR | 1997 | 181 | 19 | 14 | 15.112 S | 0.500 | -2.033 |
| FLL  | 1997 | 181 | 19 | 13 | 33.939 S | 0.500 | -0.011 |
| TWR2 | 1997 | 181 | 19 | 13 | 21.537 S | 0.500 | 0.512  |

|      |     |    |    |         |           |           |         |    |       |
|------|-----|----|----|---------|-----------|-----------|---------|----|-------|
| 1997 | 191 | 14 | 55 | 59.1730 | -22.73300 | -70.89400 | 33.0000 | 10 | 9.733 |
|------|-----|----|----|---------|-----------|-----------|---------|----|-------|

|      |      |     |    |    |          |       |        |
|------|------|-----|----|----|----------|-------|--------|
| DP00 | 1997 | 191 | 15 | 16 | 57.480 S | 0.500 | 1.137  |
| ARC2 | 1997 | 191 | 15 | 16 | 59.302 S | 0.500 | 0.445  |
| BGR  | 1997 | 191 | 15 | 17 | 5.911 S  | 0.500 | -1.700 |
| JUN  | 1997 | 191 | 15 | 17 | 3.985 S  | 0.500 | 0.165  |
| BRR  | 1997 | 191 | 15 | 17 | 8.831 S  | 0.500 | -1.274 |
| SRF  | 1997 | 191 | 15 | 17 | 4.878 S  | 0.500 | 0.180  |
| VTV  | 1997 | 191 | 15 | 16 | 39.982 S | 0.500 | -0.344 |
| WMD  | 1997 | 191 | 15 | 17 | 1.997 S  | 0.500 | 0.043  |
| WHP  | 1997 | 191 | 15 | 17 | 2.692 S  | 0.500 | 0.121  |
| HVY  | 1997 | 191 | 15 | 17 | 6.842 S  | 0.500 | -3.166 |
| FLL  | 1997 | 191 | 15 | 17 | 11.879 S | 0.500 | -0.918 |
| SMD  | 1997 | 191 | 15 | 17 | 7.504 S  | 0.500 | -0.668 |
| CWC  | 1997 | 191 | 15 | 17 | 1.160 S  | 0.500 | 0.763  |
| SLC  | 1997 | 191 | 15 | 16 | 58.987 S | 0.500 | 0.170  |
| BPC  | 1997 | 191 | 15 | 17 | 8.840 S  | 0.500 | 0.482  |
| DGR  | 1997 | 191 | 15 | 16 | 32.536 S | 0.500 | 1.806  |
| BVC  | 1997 | 191 | 15 | 17 | 1.374 S  | 0.500 | 0.494  |
| CMB  | 1997 | 191 | 15 | 17 | 26.620 S | 0.500 | -0.649 |
| SFT  | 1997 | 191 | 15 | 16 | 59.275 S | 0.500 | 0.637  |
| GSC  | 1997 | 191 | 15 | 16 | 43.619 S | 0.500 | 0.672  |
| PFO  | 1997 | 191 | 15 | 16 | 29.013 S | 0.500 | 2.271  |
| PDC  | 1997 | 191 | 15 | 17 | 1.894 S  | 0.500 | -0.667 |

|      |     |    |   |         |          |           |         |    |       |
|------|-----|----|---|---------|----------|-----------|---------|----|-------|
| 1997 | 195 | 16 | 9 | 36.9323 | 43.24900 | 146.38100 | 33.0000 | 11 | 1.412 |
|------|-----|----|---|---------|----------|-----------|---------|----|-------|

|      |      |     |    |    |          |       |        |
|------|------|-----|----|----|----------|-------|--------|
| SRF  | 1997 | 195 | 16 | 29 | 47.471 S | 0.500 | 0.626  |
| WVOR | 1997 | 195 | 16 | 29 | 3.038 S  | 0.500 | 1.142  |
| WHP  | 1997 | 195 | 16 | 29 | 48.913 S | 0.500 | 0.156  |
| OVY  | 1997 | 195 | 16 | 29 | 47.073 S | 0.500 | 0.644  |
| BMN  | 1997 | 195 | 16 | 29 | 27.268 S | 0.500 | 0.102  |
| BPC  | 1997 | 195 | 16 | 29 | 46.309 S | 0.500 | 3.287  |
| CMB  | 1997 | 195 | 16 | 29 | 22.064 S | 0.500 | 0.724  |
| VTV  | 1997 | 195 | 16 | 30 | 9.208 S  | 0.500 | -0.597 |
| BGR  | 1997 | 195 | 16 | 29 | 41.704 S | 0.500 | -0.540 |
| CWC  | 1997 | 195 | 16 | 29 | 50.908 S | 0.500 | 0.233  |
| SFT  | 1997 | 195 | 16 | 29 | 52.248 S | 0.500 | -0.166 |
| TWR2 | 1997 | 195 | 16 | 29 | 48.320 S | 0.500 | -0.729 |
| BVC  | 1997 | 195 | 16 | 29 | 49.912 S | 0.500 | 0.066  |
| DP00 | 1997 | 195 | 16 | 29 | 54.309 S | 0.500 | -0.833 |
| WMD  | 1997 | 195 | 16 | 29 | 48.172 S | 0.500 | -0.863 |
| PDC  | 1997 | 195 | 16 | 29 | 44.716 S | 0.500 | -1.854 |
| JUN  | 1997 | 195 | 16 | 29 | 47.477 S | 0.500 | 0.049  |
| SLC  | 1997 | 195 | 16 | 29 | 51.980 S | 0.500 | -0.722 |
| DGR  | 1997 | 195 | 16 | 30 | 18.126 S | 0.500 | -0.726 |

|      |     |    |    |         |           |           |          |    |       |
|------|-----|----|----|---------|-----------|-----------|----------|----|-------|
| 1997 | 201 | 10 | 14 | 27.9260 | -22.98200 | -66.30100 | 256.1000 | 13 | 5.126 |
|------|-----|----|----|---------|-----------|-----------|----------|----|-------|

|      |      |     |    |    |          |       |        |
|------|------|-----|----|----|----------|-------|--------|
| DP00 | 1997 | 201 | 10 | 35 | 14.903 S | 0.500 | 2.124  |
| SLC  | 1997 | 201 | 10 | 35 | 16.567 S | 0.500 | 1.487  |
| HVY  | 1997 | 201 | 10 | 35 | 22.572 S | 0.500 | -3.621 |
| GSC  | 1997 | 201 | 10 | 35 | 1.524 S  | 0.500 | 1.432  |
| CMB  | 1997 | 201 | 10 | 35 | 42.144 S | 0.500 | -0.349 |
| BGR  | 1997 | 201 | 10 | 35 | 21.896 S | 0.500 | -1.951 |
| FLL  | 1997 | 201 | 10 | 35 | 27.662 S | 0.500 | -0.874 |

|      |      |     |    |         |           |            |          |        |    |       |
|------|------|-----|----|---------|-----------|------------|----------|--------|----|-------|
| BRR  | 1997 | 201 | 10 | 35      | 24.600    | S          | 0.500    | -1.524 |    |       |
| BVC  | 1997 | 201 | 10 | 35      | 18.109    | S          | 0.500    | 1.136  |    |       |
| CCC  | 1997 | 201 | 10 | 35      | 21.762    | S          | 0.500    | -0.606 |    |       |
| DGR  | 1997 | 201 | 10 | 34      | 51.049    | S          | 0.500    | 1.891  |    |       |
| JUN  | 1997 | 201 | 10 | 35      | 20.370    | S          | 0.500    | 0.308  |    |       |
| VTV  | 1997 | 201 | 10 | 34      | 58.158    | S          | 0.500    | 0.092  |    |       |
| BPC  | 1997 | 201 | 10 | 35      | 24.556    | S          | 0.500    | 0.368  |    |       |
| TWR2 | 1997 | 201 | 10 | 35      | 19.048    | S          | 0.500    | 0.778  |    |       |
| PDC  | 1997 | 201 | 10 | 35      | 18.686    | S          | 0.500    | -0.568 |    |       |
| SMD  | 1997 | 201 | 10 | 35      | 23.953    | S          | 0.500    | -0.167 |    |       |
| CPR  | 1997 | 201 | 10 | 35      | 22.466    | S          | 0.500    | 0.045  |    |       |
|      |      |     |    |         |           |            |          |        |    |       |
| 1997 | 210  | 17  | 40 | 15.1637 | 1.53500   | -90.96700  | 10.0000  |        | 14 | 9.004 |
| SLC  | 1997 | 210 | 17 | 54      | 36.732    | S          | 0.500    | -0.078 |    |       |
| BPC  | 1997 | 210 | 17 | 54      | 50.697    | S          | 0.500    | 1.539  |    |       |
| SMD  | 1997 | 210 | 17 | 54      | 49.250    | S          | 0.500    | 0.310  |    |       |
| ARC2 | 1997 | 210 | 17 | 54      | 36.094    | S          | 0.500    | -0.287 |    |       |
| CPR  | 1997 | 210 | 17 | 54      | 46.938    | S          | 0.500    | 0.442  |    |       |
| DGR  | 1997 | 210 | 17 | 53      | 59.129    | S          | 0.500    | -0.305 |    |       |
| GSC  | 1997 | 210 | 17 | 54      | 15.885    | S          | 0.500    | -0.042 |    |       |
| LMC  | 1997 | 210 | 17 | 54      | 43.988    | S          | 0.500    | -1.085 |    |       |
| DP00 | 1997 | 210 | 17 | 54      | 34.096    | S          | 0.500    | 0.629  |    |       |
| TWR2 | 1997 | 210 | 17 | 54      | 40.427    | S          | 0.500    | -0.002 |    |       |
| WMD  | 1997 | 210 | 17 | 54      | 40.016    | S          | 0.500    | -0.297 |    |       |
| SFT  | 1997 | 210 | 17 | 54      | 36.526    | S          | 0.500    | 0.202  |    |       |
| PDC  | 1997 | 210 | 17 | 54      | 41.160    | S          | 0.500    | -0.095 |    |       |
| JUN  | 1997 | 210 | 17 | 54      | 43.451    | S          | 0.500    | 0.367  |    |       |
| FLL  | 1997 | 210 | 17 | 54      | 53.712    | S          | 0.500    | -1.298 |    |       |
|      |      |     |    |         |           |            |          |        |    |       |
| 1997 | 175  | 23  | 5  | 2.4394  | -1.92400  | 127.89900  | 33.0000  |        | 18 | 9.299 |
| GSC  | 1997 | 175 | 23 | 30      | 14.216    | S          | 0.500    | 2.469  |    |       |
| SFK  | 1997 | 175 | 23 | 30      | 2.249     | S          | 0.500    | -1.844 |    |       |
| CPR  | 1997 | 175 | 23 | 30      | 3.926     | S          | 0.500    | -1.007 |    |       |
| BPC  | 1997 | 175 | 23 | 30      | 6.982     | S          | 0.500    | 1.939  |    |       |
| FLL  | 1997 | 175 | 23 | 30      | 3.743     | S          | 0.500    | 0.570  |    |       |
| WMD  | 1997 | 175 | 23 | 30      | 4.483     | S          | 0.500    | -1.330 |    |       |
| SMD  | 1997 | 175 | 23 | 30      | 4.687     | S          | 0.500    | 0.171  |    |       |
| SRF  | 1997 | 175 | 23 | 30      | 6.806     | S          | 0.500    | 0.564  |    |       |
| CHP  | 1997 | 175 | 23 | 30      | 7.780     | S          | 0.500    | 0.212  |    |       |
| WHP  | 1997 | 175 | 23 | 30      | 6.464     | S          | 0.500    | 0.013  |    |       |
| JUN  | 1997 | 175 | 23 | 30      | 5.560     | S          | 0.500    | -0.369 |    |       |
| SFT  | 1997 | 175 | 23 | 30      | 6.962     | S          | 0.500    | -0.165 |    |       |
| HVY  | 1997 | 175 | 23 | 30      | 0.837     | S          | 0.500    | -1.222 |    |       |
|      |      |     |    |         |           |            |          |        |    |       |
| 1997 | 279  | 12  | 30 | 9.9150  | 9.79000   | 125.77900  | 105.6000 |        | 19 | 4.095 |
| JUN  | 1997 | 279 | 12 | 54      | 32.077    | S          | 0.500    | -0.653 |    |       |
| PDC  | 1997 | 279 | 12 | 54      | 28.114    | S          | 0.500    | -2.760 |    |       |
| ARC2 | 1997 | 279 | 12 | 54      | 36.391    | S          | 0.500    | 2.622  |    |       |
| PHL  | 1997 | 279 | 12 | 54      | 26.758    | S          | 0.500    | 0.119  |    |       |
| FLL  | 1997 | 279 | 12 | 54      | 29.996    | S          | 0.500    | 0.807  |    |       |
| BPC  | 1997 | 279 | 12 | 54      | 31.446    | S          | 0.500    | 0.139  |    |       |
| DP00 | 1997 | 279 | 12 | 54      | 34.478    | S          | 0.500    | -0.991 |    |       |
| PLM  | 1997 | 279 | 12 | 54      | 45.528    | S          | 0.500    | 2.997  |    |       |
| CHP  | 1997 | 279 | 12 | 54      | 34.263    | S          | 0.500    | -0.783 |    |       |
| SFK  | 1997 | 279 | 12 | 54      | 28.913    | S          | 0.500    | -2.069 |    |       |
| BRR  | 1997 | 279 | 12 | 54      | 28.647    | S          | 0.500    | -0.939 |    |       |
| GSC  | 1997 | 279 | 12 | 54      | 42.127    | S          | 0.500    | 3.129  |    |       |
| HVY  | 1997 | 279 | 12 | 54      | 26.961    | S          | 0.500    | -1.619 |    |       |
|      |      |     |    |         |           |            |          |        |    |       |
| 2005 | 165  | 1   | 22 | 16.0252 | -18.71900 | -174.71500 | 144.1000 |        | 1  | 3.935 |
| SNCC | 2005 | 165 | 1  | 42      | 56.145    | S          | 0.500    | 1.461  |    |       |
| SN71 | 2005 | 165 | 1  | 43      | 16.498    | S          | 0.500    | -0.418 |    |       |
| PKD  | 2005 | 165 | 1  | 43      | 5.986     | S          | 0.500    | 1.192  |    |       |

|      |      |     |   |    |          |       |        |
|------|------|-----|---|----|----------|-------|--------|
| RRX  | 2005 | 165 | 1 | 43 | 22.496 S | 0.500 | -1.410 |
| SUTB | 2005 | 165 | 1 | 43 | 17.585 S | 0.500 | -0.924 |
| WDC  | 2005 | 165 | 1 | 43 | 21.875 S | 0.500 | -0.883 |
| ELFS | 2005 | 165 | 1 | 43 | 34.139 S | 0.500 | -0.738 |
| FMP  | 2005 | 165 | 1 | 43 | 6.977 S  | 0.500 | 0.040  |
| OSI  | 2005 | 165 | 1 | 43 | 9.562 S  | 0.500 | -0.171 |
| SN42 | 2005 | 165 | 1 | 43 | 20.333 S | 0.500 | -0.023 |
| VES  | 2005 | 165 | 1 | 43 | 13.962 S | 0.500 | -0.500 |
| MPP  | 2005 | 165 | 1 | 43 | 3.854 S  | 0.500 | 0.306  |
| BBS  | 2005 | 165 | 1 | 43 | 18.929 S | 0.500 | 0.788  |
| FUR  | 2005 | 165 | 1 | 43 | 33.202 S | 0.500 | -1.114 |
| P05C | 2005 | 165 | 1 | 43 | 26.351 S | 0.500 | -0.608 |
| S05C | 2005 | 165 | 1 | 43 | 15.238 S | 0.500 | -0.508 |
| WVOR | 2005 | 165 | 1 | 43 | 59.271 S | 0.500 | -0.358 |
| T06C | 2005 | 165 | 1 | 43 | 17.555 S | 0.500 | -0.340 |
| S04C | 2005 | 165 | 1 | 43 | 10.681 S | 0.500 | 0.824  |
| MWC  | 2005 | 165 | 1 | 43 | 11.735 S | 0.500 | -0.674 |
| TIN  | 2005 | 165 | 1 | 43 | 28.787 S | 0.500 | 0.001  |
| EDW2 | 2005 | 165 | 1 | 43 | 16.522 S | 0.500 | -0.064 |
| SN47 | 2005 | 165 | 1 | 43 | 32.731 S | 0.500 | 1.381  |
| BFS  | 2005 | 165 | 1 | 43 | 15.300 S | 0.500 | 0.118  |
| SN51 | 2005 | 165 | 1 | 43 | 16.649 S | 0.500 | -0.216 |
| SHO  | 2005 | 165 | 1 | 43 | 35.641 S | 0.500 | 0.150  |
| PACP | 2005 | 165 | 1 | 43 | 7.377 S  | 0.500 | 0.419  |
| SBPX | 2005 | 165 | 1 | 43 | 17.959 S | 0.500 | -0.634 |
| SN62 | 2005 | 165 | 1 | 43 | 19.235 S | 0.500 | -0.525 |
| VTV  | 2005 | 165 | 1 | 43 | 19.198 S | 0.500 | -0.320 |
| PAS  | 2005 | 165 | 1 | 43 | 10.468 S | 0.500 | -0.086 |
| O04C | 2005 | 165 | 1 | 43 | 29.147 S | 0.500 | -1.359 |
| SN48 | 2005 | 165 | 1 | 43 | 35.305 S | 0.500 | 1.608  |
| SN38 | 2005 | 165 | 1 | 43 | 35.510 S | 0.500 | 1.236  |
| MLAC | 2005 | 165 | 1 | 43 | 30.205 S | 0.500 | 1.882  |
| CWC  | 2005 | 165 | 1 | 43 | 26.255 S | 0.500 | 0.028  |
| SN11 | 2005 | 165 | 1 | 43 | 16.973 S | 0.500 | -1.441 |
| ISA  | 2005 | 165 | 1 | 43 | 18.453 S | 0.500 | 0.394  |
| LAVA | 2005 | 165 | 1 | 43 | 22.215 S | 0.500 | 0.000  |
| HEC  | 2005 | 165 | 1 | 43 | 26.823 S | 0.500 | -1.664 |
| SN26 | 2005 | 165 | 1 | 43 | 31.337 S | 0.500 | 1.075  |
| GRA  | 2005 | 165 | 1 | 43 | 34.019 S | 0.500 | -0.344 |
| SLA  | 2005 | 165 | 1 | 43 | 28.701 S | 0.500 | 0.366  |
| YBH  | 2005 | 165 | 1 | 43 | 30.069 S | 0.500 | 0.307  |
| SPG  | 2005 | 165 | 1 | 43 | 17.520 S | 0.500 | -0.866 |
| SN21 | 2005 | 165 | 1 | 43 | 16.801 S | 0.500 | -1.175 |
| ORV  | 2005 | 165 | 1 | 43 | 21.982 S | 0.500 | -0.503 |
| CMB  | 2005 | 165 | 1 | 43 | 20.132 S | 0.500 | 0.247  |
| HELL | 2005 | 165 | 1 | 43 | 19.283 S | 0.500 | -1.532 |
| CLC  | 2005 | 165 | 1 | 43 | 25.976 S | 0.500 | 0.482  |
| TPH  | 2005 | 165 | 1 | 43 | 41.238 S | 0.500 | -0.972 |
| MNRC | 2005 | 165 | 1 | 43 | 12.928 S | 0.500 | 1.182  |
| SN37 | 2005 | 165 | 1 | 43 | 32.797 S | 0.500 | 1.204  |
| MGE  | 2005 | 165 | 1 | 43 | 22.881 S | 0.500 | 0.923  |
| V05C | 2005 | 165 | 1 | 43 | 10.274 S | 0.500 | 1.345  |
| PLM  | 2005 | 165 | 1 | 43 | 16.264 S | 0.500 | 0.396  |
| BBR  | 2005 | 165 | 1 | 43 | 21.078 S | 0.500 | -0.117 |
| LGU  | 2005 | 165 | 1 | 43 | 4.055 S  | 0.500 | 0.281  |
| GSC  | 2005 | 165 | 1 | 43 | 28.066 S | 0.500 | 0.075  |
| CHF  | 2005 | 165 | 1 | 43 | 12.820 S | 0.500 | -0.308 |
| VCS  | 2005 | 165 | 1 | 43 | 13.143 S | 0.500 | -0.036 |
| TOV  | 2005 | 165 | 1 | 43 | 6.040 S  | 0.500 | 0.311  |
| SN28 | 2005 | 165 | 1 | 43 | 35.568 S | 0.500 | 0.921  |
| HATC | 2005 | 165 | 1 | 43 | 30.699 S | 0.500 | -0.884 |
| SN67 | 2005 | 165 | 1 | 43 | 30.925 S | 0.500 | 0.476  |
| CAP  | 2005 | 165 | 1 | 43 | 13.664 S | 0.500 | 0.299  |



|      |      |     |    |         |          |           |         |   |        |
|------|------|-----|----|---------|----------|-----------|---------|---|--------|
| 2005 | 165  | 17  | 10 | 11.6326 | 51.23900 | 179.31400 | 17.0000 | 2 | -0.647 |
| VCS  | 2005 | 165 | 17 | 25      | 37.604 S |           | 0.500   |   | -0.252 |
| SBPX | 2005 | 165 | 17 | 25      | 47.272 S |           | 0.500   |   | -1.053 |
| SN71 | 2005 | 165 | 17 | 24      | 48.464 S |           | 0.500   |   | 0.340  |
| HAST | 2005 | 165 | 17 | 24      | 48.849 S |           | 0.500   |   | -0.300 |
| PACP | 2005 | 165 | 17 | 24      | 46.633 S |           | 0.500   |   | 0.638  |
| SPG  | 2005 | 165 | 17 | 25      | 14.750 S |           | 0.500   |   | -1.441 |
| S05C | 2005 | 165 | 17 | 24      | 51.865 S |           | 0.500   |   | 0.376  |
| JCS  | 2005 | 165 | 17 | 26      | 4.805 S  |           | 0.500   |   | 0.319  |
| VTV  | 2005 | 165 | 17 | 25      | 43.583 S |           | 0.500   |   | -0.483 |
| EDW2 | 2005 | 165 | 17 | 25      | 34.865 S |           | 0.500   |   | -0.235 |
| SN51 | 2005 | 165 | 17 | 24      | 55.520 S |           | 0.500   |   | 0.737  |
| T06C | 2005 | 165 | 17 | 25      | 0.962 S  |           | 0.500   |   | 0.770  |
| SN21 | 2005 | 165 | 17 | 25      | 3.828 S  |           | 0.500   |   | 0.099  |
| SN11 | 2005 | 165 | 17 | 25      | 6.143 S  |           | 0.500   |   | -0.392 |
| LAVA | 2005 | 165 | 17 | 24      | 35.841 S |           | 0.500   |   | 0.559  |
| TOV  | 2005 | 165 | 17 | 25      | 33.256 S |           | 0.500   |   | -1.196 |
| ARV  | 2005 | 165 | 17 | 25      | 23.827 S |           | 0.500   |   | -1.508 |
| GRA  | 2005 | 165 | 17 | 25      | 22.432 S |           | 0.500   |   | 1.010  |
| SN38 | 2005 | 165 | 17 | 25      | 4.361 S  |           | 0.500   |   | 0.845  |
| TIN  | 2005 | 165 | 17 | 25      | 14.487 S |           | 0.500   |   | 1.050  |
| DEC  | 2005 | 165 | 17 | 25      | 37.179 S |           | 0.500   |   | -0.814 |
| FUR  | 2005 | 165 | 17 | 25      | 29.604 S |           | 0.500   |   | -0.884 |
| MSJ  | 2005 | 165 | 17 | 25      | 54.182 S |           | 0.500   |   | -0.024 |
| SN48 | 2005 | 165 | 17 | 25      | 2.408 S  |           | 0.500   |   | 1.829  |
| O05C | 2005 | 165 | 17 | 24      | 22.799 S |           | 0.500   |   | -0.222 |
| P05C | 2005 | 165 | 17 | 24      | 31.249 S |           | 0.500   |   | -0.639 |
| BBS  | 2005 | 165 | 17 | 25      | 51.862 S |           | 0.500   |   | -1.254 |
| O04C | 2005 | 165 | 17 | 24      | 19.552 S |           | 0.500   |   | 0.968  |
| SDD  | 2005 | 165 | 17 | 25      | 50.795 S |           | 0.500   |   | 0.483  |
| ORV  | 2005 | 165 | 17 | 24      | 20.679 S |           | 0.500   |   | -0.447 |
| VES  | 2005 | 165 | 17 | 25      | 14.500 S |           | 0.500   |   | -1.931 |
| BDM  | 2005 | 165 | 17 | 24      | 33.619 S |           | 0.500   |   | 1.687  |
| SDP  | 2005 | 165 | 17 | 25      | 15.806 S |           | 0.500   |   | 0.131  |
| PAS  | 2005 | 165 | 17 | 25      | 39.206 S |           | 0.500   |   | -1.159 |
| HEC  | 2005 | 165 | 17 | 25      | 49.481 S |           | 0.500   |   | -0.972 |
| RPV  | 2005 | 165 | 17 | 25      | 40.976 S |           | 0.500   |   | -1.082 |
| MGE  | 2005 | 165 | 17 | 25      | 58.057 S |           | 0.500   |   | -1.215 |
| RSS  | 2005 | 165 | 17 | 25      | 48.573 S |           | 0.500   |   | -0.806 |
| V05C | 2005 | 165 | 17 | 25      | 9.902 S  |           | 0.500   |   | 1.176  |
| PHL  | 2005 | 165 | 17 | 25      | 7.698 S  |           | 0.500   |   | 0.518  |
| SN28 | 2005 | 165 | 17 | 25      | 7.603 S  |           | 0.500   |   | 1.150  |
| MPP  | 2005 | 165 | 17 | 25      | 19.725 S |           | 0.500   |   | 0.659  |
| WDC  | 2005 | 165 | 17 | 24      | 4.444 S  |           | 0.500   |   | 1.908  |
| BAK  | 2005 | 165 | 17 | 25      | 20.106 S |           | 0.500   |   | -0.682 |
| SLA  | 2005 | 165 | 17 | 25      | 31.780 S |           | 0.500   |   | -0.615 |
| PLS  | 2005 | 165 | 17 | 25      | 47.788 S |           | 0.500   |   | -1.134 |
| ISA  | 2005 | 165 | 17 | 25      | 22.011 S |           | 0.500   |   | -1.624 |
| RRX  | 2005 | 165 | 17 | 25      | 43.665 S |           | 0.500   |   | -0.357 |
| Q04C | 2005 | 165 | 17 | 24      | 29.175 S |           | 0.500   |   | 0.746  |
| V03C | 2005 | 165 | 17 | 24      | 56.010 S |           | 0.500   |   | 0.742  |
| ADO  | 2005 | 165 | 17 | 25      | 43.253 S |           | 0.500   |   | -0.132 |
| FMP  | 2005 | 165 | 17 | 25      | 42.595 S |           | 0.500   |   | -0.535 |
| PKD  | 2005 | 165 | 17 | 25      | 2.657 S  |           | 0.500   |   | 0.233  |
| CWC  | 2005 | 165 | 17 | 25      | 20.511 S |           | 0.500   |   | 0.118  |
| CLC  | 2005 | 165 | 17 | 25      | 29.175 S |           | 0.500   |   | -1.053 |
| R04C | 2005 | 165 | 17 | 24      | 37.889 S |           | 0.500   |   | 0.223  |
| RCT  | 2005 | 165 | 17 | 25      | 9.408 S  |           | 0.500   |   | -1.209 |
| GSC  | 2005 | 165 | 17 | 25      | 40.572 S |           | 0.500   |   | -1.355 |
| MWC  | 2005 | 165 | 17 | 25      | 39.857 S |           | 0.500   |   | -1.194 |
| FARB | 2005 | 165 | 17 | 24      | 23.405 S |           | 0.500   |   | -0.246 |
| OSI  | 2005 | 165 | 17 | 25      | 31.390 S |           | 0.500   |   | 0.209  |

|      |      |     |    |    |        |   |       |        |
|------|------|-----|----|----|--------|---|-------|--------|
| DGR  | 2005 | 165 | 17 | 25 | 54.694 | S | 0.500 | -0.597 |
| MNRC | 2005 | 165 | 17 | 24 | 21.392 | S | 0.500 | 2.847  |
| CVS  | 2005 | 165 | 17 | 24 | 23.310 | S | 0.500 | 0.325  |
| SVD  | 2005 | 165 | 17 | 25 | 49.200 | S | 0.500 | -1.214 |
| T05C | 2005 | 165 | 17 | 24 | 54.990 | S | 0.500 | 2.565  |
| HOPS | 2005 | 165 | 17 | 24 | 13.019 | S | 0.500 | 1.409  |
| PLM  | 2005 | 165 | 17 | 25 | 59.604 | S | 0.500 | -0.091 |
| BOR  | 2005 | 165 | 17 | 26 | 4.466  | S | 0.500 | 0.418  |
| GOR  | 2005 | 165 | 17 | 25 | 58.652 | S | 0.500 | 0.718  |
| SMM  | 2005 | 165 | 17 | 25 | 14.026 | S | 0.500 | 0.790  |
| BBR  | 2005 | 165 | 17 | 25 | 49.618 | S | 0.500 | -1.277 |
| JRSC | 2005 | 165 | 17 | 24 | 32.931 | S | 0.500 | -0.594 |
| V04C | 2005 | 165 | 17 | 25 | 3.395  | S | 0.500 | 1.242  |
| SN42 | 2005 | 165 | 17 | 24 | 59.719 | S | 0.500 | 0.417  |
| BFS  | 2005 | 165 | 17 | 25 | 43.912 | S | 0.500 | -0.361 |
| HELL | 2005 | 165 | 17 | 25 | 8.520  | S | 0.500 | -1.114 |
| S04C | 2005 | 165 | 17 | 24 | 42.543 | S | 0.500 | 1.565  |
| SN62 | 2005 | 165 | 17 | 24 | 53.071 | S | 0.500 | 0.603  |
| CMB  | 2005 | 165 | 17 | 24 | 46.138 | S | 0.500 | 1.271  |

|      |     |    |    |         |         |           |         |   |       |
|------|-----|----|----|---------|---------|-----------|---------|---|-------|
| 2005 | 181 | 21 | 26 | 45.5952 | 8.44700 | -82.87300 | 37.6000 | 3 | 9.595 |
|------|-----|----|----|---------|---------|-----------|---------|---|-------|

|      |      |     |    |    |        |   |       |        |
|------|------|-----|----|----|--------|---|-------|--------|
| PKD  | 2005 | 181 | 21 | 41 | 16.695 | S | 0.500 | -1.005 |
| EDW2 | 2005 | 181 | 21 | 40 | 42.542 | S | 0.500 | -1.082 |
| SMM  | 2005 | 181 | 21 | 41 | 7.829  | S | 0.500 | 0.188  |
| SN48 | 2005 | 181 | 21 | 41 | 15.307 | S | 0.500 | 0.324  |
| PHL  | 2005 | 181 | 21 | 41 | 13.768 | S | 0.500 | -0.225 |
| ARV  | 2005 | 181 | 21 | 40 | 53.236 | S | 0.500 | -0.733 |
| SN26 | 2005 | 181 | 21 | 41 | 9.242  | S | 0.500 | -0.417 |
| OSI  | 2005 | 181 | 21 | 40 | 48.573 | S | 0.500 | -0.638 |
| RPV  | 2005 | 181 | 21 | 40 | 39.989 | S | 0.500 | 0.648  |
| SPG  | 2005 | 181 | 21 | 41 | 1.798  | S | 0.500 | 0.395  |
| DEV  | 2005 | 181 | 21 | 40 | 21.858 | S | 0.500 | 0.536  |
| SN67 | 2005 | 181 | 21 | 41 | 22.256 | S | 0.500 | 0.459  |
| BBR  | 2005 | 181 | 21 | 40 | 28.462 | S | 0.500 | 0.660  |
| MNV  | 2005 | 181 | 21 | 41 | 12.585 | S | 0.500 | -0.606 |
| ISA  | 2005 | 181 | 21 | 40 | 55.309 | S | 0.500 | 0.767  |
| DEC  | 2005 | 181 | 21 | 40 | 42.340 | S | 0.500 | -0.038 |
| SN37 | 2005 | 181 | 21 | 41 | 12.309 | S | 0.500 | 0.228  |
| FMP  | 2005 | 181 | 21 | 40 | 38.880 | S | 0.500 | 0.921  |
| BFS  | 2005 | 181 | 21 | 40 | 35.543 | S | 0.500 | 0.199  |
| DJJ  | 2005 | 181 | 21 | 40 | 43.289 | S | 0.500 | 0.702  |
| PAS  | 2005 | 181 | 21 | 40 | 40.337 | S | 0.500 | 0.526  |
| DGR  | 2005 | 181 | 21 | 40 | 25.069 | S | 0.500 | 1.209  |
| SN38 | 2005 | 181 | 21 | 41 | 11.987 | S | 0.500 | -0.149 |
| GOR  | 2005 | 181 | 21 | 40 | 22.978 | S | 0.500 | 0.627  |
| BOR  | 2005 | 181 | 21 | 40 | 15.757 | S | 0.500 | 1.282  |
| LRL  | 2005 | 181 | 21 | 40 | 45.347 | S | 0.500 | 0.297  |
| CLC  | 2005 | 181 | 21 | 40 | 47.179 | S | 0.500 | 0.587  |
| GSC  | 2005 | 181 | 21 | 40 | 34.942 | S | 0.500 | 0.345  |
| HELL | 2005 | 181 | 21 | 41 | 6.747  | S | 0.500 | -1.056 |
| P05C | 2005 | 181 | 21 | 41 | 42.223 | S | 0.500 | -1.203 |
| ORV  | 2005 | 181 | 21 | 41 | 51.486 | S | 0.500 | -1.794 |
| SN12 | 2005 | 181 | 21 | 41 | 8.606  | S | 0.500 | -1.160 |
| VTV  | 2005 | 181 | 21 | 40 | 33.359 | S | 0.500 | -0.866 |
| FUR  | 2005 | 181 | 21 | 40 | 44.229 | S | 0.500 | -0.099 |
| JCS  | 2005 | 181 | 21 | 40 | 16.227 | S | 0.500 | 1.072  |
| R04C | 2005 | 181 | 21 | 41 | 37.462 | S | 0.500 | -0.901 |

|      |     |   |   |         |          |            |         |   |       |
|------|-----|---|---|---------|----------|------------|---------|---|-------|
| 2005 | 210 | 5 | 0 | 34.7194 | 52.90600 | -168.64700 | 50.3000 | 4 | 4.629 |
|------|-----|---|---|---------|----------|------------|---------|---|-------|

|      |      |     |   |    |        |   |       |        |
|------|------|-----|---|----|--------|---|-------|--------|
| MWC  | 2005 | 210 | 5 | 14 | 7.858  | S | 0.500 | -1.552 |
| SN24 | 2005 | 210 | 5 | 13 | 30.367 | S | 0.500 | 0.009  |
| VCS  | 2005 | 210 | 5 | 14 | 5.450  | S | 0.500 | -0.510 |
| ORV  | 2005 | 210 | 5 | 12 | 42.046 | S | 0.500 | -2.310 |

|      |      |     |   |    |        |   |       |        |
|------|------|-----|---|----|--------|---|-------|--------|
| CLC  | 2005 | 210 | 5 | 13 | 55.725 | S | 0.500 | -1.413 |
| SVD  | 2005 | 210 | 5 | 14 | 17.578 | S | 0.500 | -1.386 |
| O04C | 2005 | 210 | 5 | 12 | 40.850 | S | 0.500 | -0.401 |
| SN47 | 2005 | 210 | 5 | 13 | 26.238 | S | 0.500 | 0.576  |
| SN23 | 2005 | 210 | 5 | 13 | 29.223 | S | 0.500 | -0.424 |
| O05C | 2005 | 210 | 5 | 12 | 45.051 | S | 0.500 | -0.951 |
| WVOR | 2005 | 210 | 5 | 12 | 43.719 | S | 0.500 | -0.893 |
| R04C | 2005 | 210 | 5 | 13 | 1.679  | S | 0.500 | -0.408 |
| SN21 | 2005 | 210 | 5 | 13 | 28.879 | S | 0.500 | -0.672 |
| PLM  | 2005 | 210 | 5 | 14 | 28.420 | S | 0.500 | -0.555 |
| SN12 | 2005 | 210 | 5 | 13 | 32.161 | S | 0.500 | -1.032 |
| BBR  | 2005 | 210 | 5 | 14 | 17.764 | S | 0.500 | -1.542 |
| SN45 | 2005 | 210 | 5 | 13 | 25.530 | S | 0.500 | 0.113  |
| SN37 | 2005 | 210 | 5 | 13 | 29.565 | S | 0.500 | 0.619  |
| SN62 | 2005 | 210 | 5 | 13 | 16.936 | S | 0.500 | -0.622 |
| P05C | 2005 | 210 | 5 | 12 | 53.425 | S | 0.500 | -2.021 |
| GOR  | 2005 | 210 | 5 | 14 | 26.791 | S | 0.500 | -0.622 |
| HELL | 2005 | 210 | 5 | 13 | 34.342 | S | 0.500 | -1.287 |
| SN74 | 2005 | 210 | 5 | 13 | 14.277 | S | 0.500 | -0.164 |
| BOR  | 2005 | 210 | 5 | 14 | 33.046 | S | 0.500 | -0.425 |
| SN84 | 2005 | 210 | 5 | 13 | 10.377 | S | 0.500 | -0.515 |
| LAVA | 2005 | 210 | 5 | 12 | 58.262 | S | 0.500 | -1.000 |
| SN85 | 2005 | 210 | 5 | 13 | 11.085 | S | 0.500 | -0.416 |
| SN52 | 2005 | 210 | 5 | 13 | 21.062 | S | 0.500 | -0.445 |
| KCC  | 2005 | 210 | 5 | 13 | 26.128 | S | 0.500 | -0.320 |
| T06C | 2005 | 210 | 5 | 13 | 25.676 | S | 0.500 | -0.169 |
| CMB  | 2005 | 210 | 5 | 13 | 10.172 | S | 0.500 | 0.628  |
| SN86 | 2005 | 210 | 5 | 13 | 10.401 | S | 0.500 | -0.578 |
| SN71 | 2005 | 210 | 5 | 13 | 12.598 | S | 0.500 | -0.531 |
| SN53 | 2005 | 210 | 5 | 13 | 21.189 | S | 0.500 | -0.343 |
| SN42 | 2005 | 210 | 5 | 13 | 24.428 | S | 0.500 | -0.325 |
| SN95 | 2005 | 210 | 5 | 13 | 7.517  | S | 0.500 | -0.583 |
| SPG  | 2005 | 210 | 5 | 13 | 41.288 | S | 0.500 | -1.433 |
| SN73 | 2005 | 210 | 5 | 13 | 14.178 | S | 0.500 | -0.135 |
| SN51 | 2005 | 210 | 5 | 13 | 19.933 | S | 0.500 | -0.246 |
| SN44 | 2005 | 210 | 5 | 13 | 25.488 | S | 0.500 | 0.221  |
| SN43 | 2005 | 210 | 5 | 13 | 24.229 | S | 0.500 | -0.203 |
| SN11 | 2005 | 210 | 5 | 13 | 31.522 | S | 0.500 | -0.981 |
| VTV  | 2005 | 210 | 5 | 14 | 10.813 | S | 0.500 | -1.362 |
| SLA  | 2005 | 210 | 5 | 13 | 57.800 | S | 0.500 | -1.500 |
| TIN  | 2005 | 210 | 5 | 13 | 39.615 | S | 0.500 | 0.427  |
| U04C | 2005 | 210 | 5 | 13 | 24.293 | S | 0.500 | 1.643  |
| M05C | 2005 | 210 | 5 | 12 | 31.012 | S | 0.500 | 0.057  |
| PAS  | 2005 | 210 | 5 | 14 | 7.124  | S | 0.500 | -1.656 |
| MPP  | 2005 | 210 | 5 | 13 | 46.664 | S | 0.500 | -0.062 |
| GRA  | 2005 | 210 | 5 | 13 | 47.083 | S | 0.500 | -0.284 |
| PLS  | 2005 | 210 | 5 | 14 | 16.130 | S | 0.500 | -1.592 |
| N02C | 2005 | 210 | 5 | 12 | 16.501 | S | 0.500 | 0.979  |
| MPM  | 2005 | 210 | 5 | 13 | 54.668 | S | 0.500 | -1.208 |
| FUR  | 2005 | 210 | 5 | 13 | 55.982 | S | 0.500 | -0.986 |
| SN46 | 2005 | 210 | 5 | 13 | 27.140 | S | 0.500 | 0.991  |
| SN48 | 2005 | 210 | 5 | 13 | 25.598 | S | 0.500 | 0.267  |
| SN67 | 2005 | 210 | 5 | 13 | 18.446 | S | 0.500 | -0.560 |
| OSI  | 2005 | 210 | 5 | 13 | 58.529 | S | 0.500 | -0.629 |
| LRL  | 2005 | 210 | 5 | 13 | 57.907 | S | 0.500 | -1.970 |
| PKD  | 2005 | 210 | 5 | 13 | 29.137 | S | 0.500 | 0.121  |
| MOD  | 2005 | 210 | 5 | 12 | 33.857 | S | 0.500 | -0.164 |
| PIN  | 2005 | 210 | 5 | 12 | 12.024 | S | 0.500 | 0.150  |
| M02C | 2005 | 210 | 5 | 12 | 16.115 | S | 0.500 | 1.620  |
| SN26 | 2005 | 210 | 5 | 13 | 32.654 | S | 0.500 | 0.978  |
| S04C | 2005 | 210 | 5 | 13 | 6.849  | S | 0.500 | 0.807  |
| SN25 | 2005 | 210 | 5 | 13 | 32.725 | S | 0.500 | 0.607  |
| ISA  | 2005 | 210 | 5 | 13 | 47.765 | S | 0.500 | -2.852 |

|      |      |     |   |    |        |   |       |        |
|------|------|-----|---|----|--------|---|-------|--------|
| JCS  | 2005 | 210 | 5 | 14 | 33.697 | S | 0.500 | -0.354 |
| BFS  | 2005 | 210 | 5 | 14 | 11.672 | S | 0.500 | -0.984 |
| SN38 | 2005 | 210 | 5 | 13 | 28.929 | S | 0.500 | 0.506  |
| HUMO | 2005 | 210 | 5 | 12 | 3.167  | S | 0.500 | 0.746  |
| SN28 | 2005 | 210 | 5 | 13 | 32.129 | S | 0.500 | 0.609  |
| EDW2 | 2005 | 210 | 5 | 14 | 1.290  | S | 0.500 | -1.570 |
| RCT  | 2005 | 210 | 5 | 13 | 35.904 | S | 0.500 | -1.070 |
| S05C | 2005 | 210 | 5 | 13 | 16.073 | S | 0.500 | -0.703 |
| SN56 | 2005 | 210 | 5 | 13 | 21.923 | S | 0.500 | -0.037 |
| SBPX | 2005 | 210 | 5 | 14 | 15.819 | S | 0.500 | -0.932 |

|      |     |   |    |         |           |            |          |   |       |
|------|-----|---|----|---------|-----------|------------|----------|---|-------|
| 2005 | 218 | 9 | 56 | 17.0681 | -19.61400 | -175.85001 | 205.4000 | 5 | 3.528 |
|------|-----|---|----|---------|-----------|------------|----------|---|-------|

|      |      |     |    |    |        |   |       |        |
|------|------|-----|----|----|--------|---|-------|--------|
| SN84 | 2005 | 218 | 10 | 17 | 25.458 | S | 0.500 | -1.029 |
| V03C | 2005 | 218 | 10 | 17 | 5.810  | S | 0.500 | 1.317  |
| FARB | 2005 | 218 | 10 | 17 | 3.951  | S | 0.500 | 0.370  |
| SMM  | 2005 | 218 | 10 | 17 | 9.206  | S | 0.500 | 0.147  |
| PHL  | 2005 | 218 | 10 | 17 | 5.759  | S | 0.500 | 0.216  |
| V04C | 2005 | 218 | 10 | 17 | 5.369  | S | 0.500 | 0.625  |
| N02C | 2005 | 218 | 10 | 17 | 22.943 | S | 0.500 | -0.366 |
| FMP  | 2005 | 218 | 10 | 17 | 11.001 | S | 0.500 | -0.132 |
| MLAC | 2005 | 218 | 10 | 17 | 33.791 | S | 0.500 | 1.757  |
| MPP  | 2005 | 218 | 10 | 17 | 8.154  | S | 0.500 | 0.384  |
| ARV  | 2005 | 218 | 10 | 17 | 15.787 | S | 0.500 | -0.103 |
| M03C | 2005 | 218 | 10 | 17 | 32.417 | S | 0.500 | -1.531 |
| PAS  | 2005 | 218 | 10 | 17 | 14.668 | S | 0.500 | -0.011 |
| GRA  | 2005 | 218 | 10 | 17 | 37.977 | S | 0.500 | -0.022 |
| HEC  | 2005 | 218 | 10 | 17 | 30.964 | S | 0.500 | -1.308 |
| VTV  | 2005 | 218 | 10 | 17 | 22.466 | S | 0.500 | -1.020 |
| M05C | 2005 | 218 | 10 | 17 | 39.593 | S | 0.500 | -0.945 |
| DEV  | 2005 | 218 | 10 | 17 | 25.802 | S | 0.500 | 0.426  |
| CIA  | 2005 | 218 | 10 | 17 | 8.360  | S | 0.500 | -0.179 |
| CWC  | 2005 | 218 | 10 | 17 | 29.977 | S | 0.500 | -0.032 |
| PACP | 2005 | 218 | 10 | 17 | 11.378 | S | 0.500 | 0.352  |
| TIN  | 2005 | 218 | 10 | 17 | 32.889 | S | 0.500 | 0.385  |
| U04C | 2005 | 218 | 10 | 17 | 11.477 | S | 0.500 | 1.374  |
| SN28 | 2005 | 218 | 10 | 17 | 39.238 | S | 0.500 | 0.996  |
| HUMO | 2005 | 218 | 10 | 17 | 37.353 | S | 0.500 | -0.237 |
| PLS  | 2005 | 218 | 10 | 17 | 16.961 | S | 0.500 | -0.014 |
| DJJ  | 2005 | 218 | 10 | 17 | 12.528 | S | 0.500 | 0.201  |
| PDU  | 2005 | 218 | 10 | 17 | 18.215 | S | 0.500 | -0.239 |
| WDC  | 2005 | 218 | 10 | 17 | 25.228 | S | 0.500 | -1.162 |
| BCC  | 2005 | 218 | 10 | 17 | 18.783 | S | 0.500 | 0.671  |
| YBH  | 2005 | 218 | 10 | 17 | 33.078 | S | 0.500 | -0.113 |
| MOD  | 2005 | 218 | 10 | 17 | 48.566 | S | 0.500 | -0.656 |
| OSI  | 2005 | 218 | 10 | 17 | 13.468 | S | 0.500 | -0.398 |
| R07C | 2005 | 218 | 10 | 17 | 34.203 | S | 0.500 | 0.696  |
| JCS  | 2005 | 218 | 10 | 17 | 20.876 | S | 0.500 | 0.459  |
| BOR  | 2005 | 218 | 10 | 17 | 23.299 | S | 0.500 | 0.658  |
| TPH  | 2005 | 218 | 10 | 17 | 45.290 | S | 0.500 | -0.377 |
| S05C | 2005 | 218 | 10 | 17 | 18.942 | S | 0.500 | -0.729 |
| M02C | 2005 | 218 | 10 | 17 | 30.194 | S | 0.500 | 0.207  |
| RCT  | 2005 | 218 | 10 | 17 | 18.848 | S | 0.500 | -1.606 |
| WVOR | 2005 | 218 | 10 | 18 | 2.188  | S | 0.500 | -0.388 |
| S04C | 2005 | 218 | 10 | 17 | 14.508 | S | 0.500 | 0.652  |
| PLM  | 2005 | 218 | 10 | 17 | 20.497 | S | 0.500 | 0.574  |
| O05C | 2005 | 218 | 10 | 17 | 31.118 | S | 0.500 | -1.475 |
| M06C | 2005 | 218 | 10 | 17 | 42.942 | S | 0.500 | -0.754 |
| R04C | 2005 | 218 | 10 | 17 | 20.718 | S | 0.500 | -0.561 |
| SVD  | 2005 | 218 | 10 | 17 | 22.962 | S | 0.500 | 0.338  |
| SN56 | 2005 | 218 | 10 | 17 | 32.705 | S | 0.500 | 0.526  |
| HAST | 2005 | 218 | 10 | 17 | 5.518  | S | 0.500 | 0.711  |
| GOR  | 2005 | 218 | 10 | 17 | 15.805 | S | 0.500 | -0.019 |
| LRL  | 2005 | 218 | 10 | 17 | 27.518 | S | 0.500 | 0.917  |

|      |      |     |    |    |        |   |       |        |
|------|------|-----|----|----|--------|---|-------|--------|
| TOV  | 2005 | 218 | 10 | 17 | 9.970  | S | 0.500 | 0.040  |
| SN85 | 2005 | 218 | 10 | 17 | 28.283 | S | 0.500 | -0.329 |
| VCS  | 2005 | 218 | 10 | 17 | 16.939 | S | 0.500 | -0.305 |
| SN57 | 2005 | 218 | 10 | 17 | 35.283 | S | 0.500 | 1.006  |
| CHF  | 2005 | 218 | 10 | 17 | 16.877 | S | 0.500 | -0.333 |
| BBR  | 2005 | 218 | 10 | 17 | 24.652 | S | 0.500 | -0.491 |
| SN45 | 2005 | 218 | 10 | 17 | 31.350 | S | 0.500 | 0.530  |
| R06C | 2005 | 218 | 10 | 17 | 33.749 | S | 0.500 | 0.406  |
| O04C | 2005 | 218 | 10 | 17 | 32.667 | S | 0.500 | -1.362 |
| ORV  | 2005 | 218 | 10 | 17 | 25.415 | S | 0.500 | -0.764 |
| EDW2 | 2005 | 218 | 10 | 17 | 20.362 | S | 0.500 | -0.227 |
| SLA  | 2005 | 218 | 10 | 17 | 32.303 | S | 0.500 | 0.192  |
| CAP  | 2005 | 218 | 10 | 17 | 17.637 | S | 0.500 | 0.180  |
| SPG  | 2005 | 218 | 10 | 17 | 21.249 | S | 0.500 | -1.064 |
| BFS  | 2005 | 218 | 10 | 17 | 19.273 | S | 0.500 | 0.042  |
| SN47 | 2005 | 218 | 10 | 17 | 36.204 | S | 0.500 | 1.206  |
| SN71 | 2005 | 218 | 10 | 17 | 20.108 | S | 0.500 | -0.691 |
| SN95 | 2005 | 218 | 10 | 17 | 26.298 | S | 0.500 | -0.612 |
| SHO  | 2005 | 218 | 10 | 17 | 39.216 | S | 0.500 | 0.072  |
| GSC  | 2005 | 218 | 10 | 17 | 31.588 | S | 0.500 | -0.180 |
| DGR  | 2005 | 218 | 10 | 17 | 20.754 | S | 0.500 | 0.406  |
| SN27 | 2005 | 218 | 10 | 17 | 36.412 | S | 0.500 | 0.820  |
| SN16 | 2005 | 218 | 10 | 17 | 34.748 | S | 0.500 | 0.389  |
| SN48 | 2005 | 218 | 10 | 17 | 38.630 | S | 0.500 | 1.328  |
| SN67 | 2005 | 218 | 10 | 17 | 34.548 | S | 0.500 | 0.449  |
| SN38 | 2005 | 218 | 10 | 17 | 39.179 | S | 0.500 | 1.306  |
| SN37 | 2005 | 218 | 10 | 17 | 36.423 | S | 0.500 | 1.187  |
| SN25 | 2005 | 218 | 10 | 17 | 31.989 | S | 0.500 | 0.525  |
| SN26 | 2005 | 218 | 10 | 17 | 34.642 | S | 0.500 | 0.709  |
| SBPX | 2005 | 218 | 10 | 17 | 22.428 | S | 0.500 | -0.173 |
| S08C | 2005 | 218 | 10 | 17 | 36.894 | S | 0.500 | 0.950  |
| P05C | 2005 | 218 | 10 | 17 | 30.092 | S | 0.500 | -0.501 |
| SN46 | 2005 | 218 | 10 | 17 | 34.408 | S | 0.500 | 1.530  |
| MPM  | 2005 | 218 | 10 | 17 | 32.370 | S | 0.500 | 0.754  |
| SN42 | 2005 | 218 | 10 | 17 | 24.083 | S | 0.500 | -0.122 |
| SN21 | 2005 | 218 | 10 | 17 | 20.683 | S | 0.500 | -1.206 |
| SN12 | 2005 | 218 | 10 | 17 | 25.033 | S | 0.500 | -1.058 |
| ISA  | 2005 | 218 | 10 | 17 | 22.132 | S | 0.500 | 0.123  |
| CMB  | 2005 | 218 | 10 | 17 | 23.652 | S | 0.500 | -0.053 |
| SN36 | 2005 | 218 | 10 | 17 | 34.806 | S | 0.500 | 1.064  |
| LAVA | 2005 | 218 | 10 | 17 | 25.842 | S | 0.500 | -0.114 |
| SN53 | 2005 | 218 | 10 | 17 | 25.083 | S | 0.500 | -0.421 |
| CLC  | 2005 | 218 | 10 | 17 | 29.827 | S | 0.500 | 0.518  |
| SN86 | 2005 | 218 | 10 | 17 | 31.046 | S | 0.500 | -0.103 |
| SN44 | 2005 | 218 | 10 | 17 | 28.315 | S | 0.500 | 0.234  |
| SN74 | 2005 | 218 | 10 | 17 | 26.208 | S | 0.500 | -0.435 |
| SN63 | 2005 | 218 | 10 | 17 | 25.533 | S | 0.500 | -0.502 |
| SN11 | 2005 | 218 | 10 | 17 | 20.858 | S | 0.500 | -1.459 |
| SN23 | 2005 | 218 | 10 | 17 | 25.813 | S | 0.500 | -0.635 |
| SN73 | 2005 | 218 | 10 | 17 | 23.808 | S | 0.500 | -0.537 |
| SN62 | 2005 | 218 | 10 | 17 | 23.018 | S | 0.500 | -0.588 |
| SN52 | 2005 | 218 | 10 | 17 | 22.933 | S | 0.500 | -0.237 |
| SN51 | 2005 | 218 | 10 | 17 | 20.608 | S | 0.500 | -0.155 |
| SN24 | 2005 | 218 | 10 | 17 | 28.912 | S | 0.500 | 0.057  |
| SN22 | 2005 | 218 | 10 | 17 | 23.633 | S | 0.500 | -0.861 |
| SN43 | 2005 | 218 | 10 | 17 | 26.163 | S | 0.500 | -0.153 |
| T06C | 2005 | 218 | 10 | 17 | 21.067 | S | 0.500 | -0.743 |

2005 219 11 35 33.4428 -14.44900 -177.29300 10.0000

6

7.303

|      |      |     |    |    |        |   |       |        |
|------|------|-----|----|----|--------|---|-------|--------|
| MPP  | 2005 | 219 | 11 | 56 | 35.482 | S | 0.500 | 0.105  |
| TIN  | 2005 | 219 | 11 | 57 | 0.251  | S | 0.500 | 0.189  |
| M06C | 2005 | 219 | 11 | 57 | 7.054  | S | 0.500 | -0.862 |
| O04C | 2005 | 219 | 11 | 56 | 56.582 | S | 0.500 | -1.608 |

|      |      |     |    |    |          |       |        |
|------|------|-----|----|----|----------|-------|--------|
| SN57 | 2005 | 219 | 11 | 57 | 1.912 S  | 0.500 | 1.084  |
| SN28 | 2005 | 219 | 11 | 57 | 6.033 S  | 0.500 | 0.582  |
| SUTB | 2005 | 219 | 11 | 56 | 45.190 S | 0.500 | -1.199 |
| SN48 | 2005 | 219 | 11 | 57 | 5.373 S  | 0.500 | 1.294  |
| HUMO | 2005 | 219 | 11 | 56 | 59.814 S | 0.500 | 0.222  |
| DEV  | 2005 | 219 | 11 | 56 | 56.483 S | 0.500 | 0.714  |
| WDC  | 2005 | 219 | 11 | 56 | 48.312 S | 0.500 | -1.124 |
| GSC  | 2005 | 219 | 11 | 57 | 2.294 S  | 0.500 | 1.025  |
| GRA  | 2005 | 219 | 11 | 57 | 5.954 S  | 0.500 | -0.238 |
| YBH  | 2005 | 219 | 11 | 56 | 55.780 S | 0.500 | 0.066  |
| GOR  | 2005 | 219 | 11 | 56 | 46.791 S | 0.500 | 0.566  |
| EDW2 | 2005 | 219 | 11 | 56 | 49.668 S | 0.500 | 0.185  |
| BOR  | 2005 | 219 | 11 | 56 | 54.533 S | 0.500 | 0.999  |
| VTV  | 2005 | 219 | 11 | 56 | 52.692 S | 0.500 | -0.321 |
| SN56 | 2005 | 219 | 11 | 56 | 59.277 S | 0.500 | 0.626  |
| P05C | 2005 | 219 | 11 | 56 | 55.104 S | 0.500 | -0.414 |
| S05C | 2005 | 219 | 11 | 56 | 44.701 S | 0.500 | -0.931 |
| SN26 | 2005 | 219 | 11 | 57 | 1.772 S  | 0.500 | 0.687  |
| MPM  | 2005 | 219 | 11 | 57 | 1.352 S  | 0.500 | 1.142  |
| CWC  | 2005 | 219 | 11 | 56 | 58.204 S | 0.500 | 0.221  |
| SVD  | 2005 | 219 | 11 | 56 | 53.086 S | 0.500 | 0.541  |
| N02C | 2005 | 219 | 11 | 56 | 45.288 S | 0.500 | -0.436 |
| LRL  | 2005 | 219 | 11 | 56 | 56.726 S | 0.500 | 1.327  |
| SN46 | 2005 | 219 | 11 | 57 | 0.953 S  | 0.500 | 1.340  |
| SN16 | 2005 | 219 | 11 | 57 | 2.595 S  | 0.500 | 0.859  |
| SN44 | 2005 | 219 | 11 | 56 | 54.488 S | 0.500 | -0.249 |
| SBPX | 2005 | 219 | 11 | 56 | 52.585 S | 0.500 | 0.201  |
| CHF  | 2005 | 219 | 11 | 56 | 46.176 S | 0.500 | -0.212 |
| R04C | 2005 | 219 | 11 | 56 | 45.835 S | 0.500 | -0.568 |
| VCS  | 2005 | 219 | 11 | 56 | 46.242 S | 0.500 | -0.014 |
| SN95 | 2005 | 219 | 11 | 56 | 52.018 S | 0.500 | -0.460 |
| S08C | 2005 | 219 | 11 | 57 | 4.425 S  | 0.500 | 1.071  |
| SPG  | 2005 | 219 | 11 | 56 | 48.552 S | 0.500 | -1.426 |
| ISA  | 2005 | 219 | 11 | 56 | 50.643 S | 0.500 | 0.496  |
| ORV  | 2005 | 219 | 11 | 56 | 49.416 S | 0.500 | -0.899 |
| BFS  | 2005 | 219 | 11 | 56 | 48.932 S | 0.500 | 0.222  |
| SN84 | 2005 | 219 | 11 | 56 | 51.486 S | 0.500 | -0.720 |
| SN86 | 2005 | 219 | 11 | 56 | 57.040 S | 0.500 | 0.086  |
| CLC  | 2005 | 219 | 11 | 56 | 58.662 S | 0.500 | 0.728  |
| SN27 | 2005 | 219 | 11 | 57 | 3.641 S  | 0.500 | 0.856  |
| SN45 | 2005 | 219 | 11 | 56 | 58.120 S | 0.500 | 0.609  |
| SN12 | 2005 | 219 | 11 | 56 | 51.859 S | 0.500 | -1.317 |
| SN21 | 2005 | 219 | 11 | 56 | 47.429 S | 0.500 | -1.270 |
| SN73 | 2005 | 219 | 11 | 56 | 49.747 S | 0.500 | -0.493 |
| SN43 | 2005 | 219 | 11 | 56 | 52.537 S | 0.500 | -0.295 |
| SN23 | 2005 | 219 | 11 | 56 | 52.321 S | 0.500 | -0.953 |
| SN53 | 2005 | 219 | 11 | 56 | 51.358 S | 0.500 | -0.483 |
| SN51 | 2005 | 219 | 11 | 56 | 46.731 S | 0.500 | -0.246 |
| SN74 | 2005 | 219 | 11 | 56 | 52.299 S | 0.500 | -0.278 |
| SN71 | 2005 | 219 | 11 | 56 | 46.032 S | 0.500 | -0.543 |
| SN52 | 2005 | 219 | 11 | 56 | 49.094 S | 0.500 | -0.411 |
| SN42 | 2005 | 219 | 11 | 56 | 50.400 S | 0.500 | -0.345 |
| SN63 | 2005 | 219 | 11 | 56 | 51.464 S | 0.500 | -0.724 |
| LAVA | 2005 | 219 | 11 | 56 | 50.569 S | 0.500 | -0.431 |
| CMB  | 2005 | 219 | 11 | 56 | 49.482 S | 0.500 | 0.167  |
| SN22 | 2005 | 219 | 11 | 56 | 50.056 S | 0.500 | -1.246 |
| SN62 | 2005 | 219 | 11 | 56 | 49.187 S | 0.500 | -0.495 |
| SN24 | 2005 | 219 | 11 | 56 | 55.704 S | 0.500 | -0.136 |
| T06C | 2005 | 219 | 11 | 56 | 47.599 S | 0.500 | -0.747 |
| SN11 | 2005 | 219 | 11 | 56 | 47.696 S | 0.500 | -1.654 |
| DJJ  | 2005 | 219 | 11 | 56 | 41.503 S | 0.500 | 0.186  |
| CVS  | 2005 | 219 | 11 | 56 | 35.078 S | 0.500 | -0.901 |
| TOV  | 2005 | 219 | 11 | 56 | 39.008 S | 0.500 | 0.377  |

|      |      |     |    |    |        |   |       |        |
|------|------|-----|----|----|--------|---|-------|--------|
| BAK  | 2005 | 219 | 11 | 56 | 44.187 | S | 0.500 | 1.040  |
| SNCC | 2005 | 219 | 11 | 56 | 30.184 | S | 0.500 | 2.389  |
| FUR  | 2005 | 219 | 11 | 57 | 6.313  | S | 0.500 | -0.474 |
| ELFS | 2005 | 219 | 11 | 57 | 1.560  | S | 0.500 | -1.009 |
| SMM  | 2005 | 219 | 11 | 56 | 36.479 | S | 0.500 | 0.180  |
| MOD  | 2005 | 219 | 11 | 57 | 12.553 | S | 0.500 | -0.709 |
| MLAC | 2005 | 219 | 11 | 57 | 0.605  | S | 0.500 | 1.695  |
| M03C | 2005 | 219 | 11 | 56 | 55.311 | S | 0.500 | -1.692 |
| M05C | 2005 | 219 | 11 | 57 | 3.216  | S | 0.500 | -1.004 |
| PACP | 2005 | 219 | 11 | 56 | 36.233 | S | 0.500 | -0.281 |
| HAST | 2005 | 219 | 11 | 56 | 31.232 | S | 0.500 | 0.849  |
| PLM  | 2005 | 219 | 11 | 56 | 51.671 | S | 0.500 | 1.206  |

|      |     |    |    |        |           |            |         |   |       |
|------|-----|----|----|--------|-----------|------------|---------|---|-------|
| 2005 | 219 | 14 | 41 | 8.4884 | -14.43500 | -177.24200 | 10.0000 | 7 | 7.508 |
|------|-----|----|----|--------|-----------|------------|---------|---|-------|

|      |      |     |    |   |        |   |       |        |
|------|------|-----|----|---|--------|---|-------|--------|
| SN63 | 2005 | 219 | 15 | 2 | 26.166 | S | 0.500 | -0.573 |
| CWC  | 2005 | 219 | 15 | 2 | 32.600 | S | 0.500 | 0.071  |
| SN36 | 2005 | 219 | 15 | 2 | 36.427 | S | 0.500 | 1.146  |
| BBR  | 2005 | 219 | 15 | 2 | 29.393 | S | 0.500 | -0.242 |
| PDU  | 2005 | 219 | 15 | 2 | 22.368 | S | 0.500 | -0.169 |
| SLA  | 2005 | 219 | 15 | 2 | 35.857 | S | 0.500 | 0.412  |
| SN37 | 2005 | 219 | 15 | 2 | 38.000 | S | 0.500 | 1.219  |
| SN86 | 2005 | 219 | 15 | 2 | 31.598 | S | 0.500 | 0.086  |
| BCC  | 2005 | 219 | 15 | 2 | 23.479 | S | 0.500 | 0.726  |
| S08C | 2005 | 219 | 15 | 2 | 38.878 | S | 0.500 | 0.972  |
| SN25 | 2005 | 219 | 15 | 2 | 33.727 | S | 0.500 | 0.596  |
| MPM  | 2005 | 219 | 15 | 2 | 35.596 | S | 0.500 | 0.841  |
| ISA  | 2005 | 219 | 15 | 2 | 24.833 | S | 0.500 | 0.148  |
| SN16 | 2005 | 219 | 15 | 2 | 36.947 | S | 0.500 | 0.658  |
| CLC  | 2005 | 219 | 15 | 2 | 33.255 | S | 0.500 | 0.778  |
| R07C | 2005 | 219 | 15 | 2 | 35.160 | S | 0.500 | 0.618  |
| WDC  | 2005 | 219 | 15 | 2 | 23.783 | S | 0.500 | -0.222 |
| WVOR | 2005 | 219 | 15 | 3 | 1.423  | S | 0.500 | -0.650 |
| SDD  | 2005 | 219 | 15 | 2 | 19.008 | S | 0.500 | -0.093 |
| SN21 | 2005 | 219 | 15 | 2 | 21.825 | S | 0.500 | -1.419 |
| V04C | 2005 | 219 | 15 | 2 | 6.484  | S | 0.500 | 0.744  |
| SAO  | 2005 | 219 | 15 | 2 | 8.475  | S | 0.500 | 0.210  |
| SPG  | 2005 | 219 | 15 | 2 | 23.645 | S | 0.500 | -0.876 |
| MGE  | 2005 | 219 | 15 | 2 | 31.514 | S | 0.500 | 0.491  |
| ARV  | 2005 | 219 | 15 | 2 | 18.615 | S | 0.500 | 0.002  |
| PHL  | 2005 | 219 | 15 | 2 | 7.274  | S | 0.500 | 0.387  |
| M06C | 2005 | 219 | 15 | 2 | 41.882 | S | 0.500 | -0.611 |
| ELFS | 2005 | 219 | 15 | 2 | 36.383 | S | 0.500 | -0.756 |
| BBS  | 2005 | 219 | 15 | 2 | 27.547 | S | 0.500 | 0.752  |
| EDW2 | 2005 | 219 | 15 | 2 | 23.853 | S | 0.500 | -0.163 |
| U04C | 2005 | 219 | 15 | 2 | 12.246 | S | 0.500 | 1.443  |
| HEC  | 2005 | 219 | 15 | 2 | 35.274 | S | 0.500 | -1.586 |
| SN57 | 2005 | 219 | 15 | 2 | 36.319 | S | 0.500 | 0.934  |
| BAK  | 2005 | 219 | 15 | 2 | 18.474 | S | 0.500 | 0.790  |
| TOV  | 2005 | 219 | 15 | 2 | 12.987 | S | 0.500 | -0.171 |
| ORV  | 2005 | 219 | 15 | 2 | 24.080 | S | 0.500 | -0.797 |
| PKD  | 2005 | 219 | 15 | 2 | 10.962 | S | 0.500 | 0.960  |
| SN44 | 2005 | 219 | 15 | 2 | 29.390 | S | 0.500 | 0.102  |
| CMB  | 2005 | 219 | 15 | 2 | 24.236 | S | 0.500 | 0.369  |
| SN67 | 2005 | 219 | 15 | 2 | 35.346 | S | 0.500 | 0.354  |
| GSC  | 2005 | 219 | 15 | 2 | 35.984 | S | 0.500 | 0.177  |
| SN12 | 2005 | 219 | 15 | 2 | 26.556 | S | 0.500 | -1.167 |
| S04C | 2005 | 219 | 15 | 2 | 14.050 | S | 0.500 | 0.473  |
| FUR  | 2005 | 219 | 15 | 2 | 40.312 | S | 0.500 | -1.021 |
| S05C | 2005 | 219 | 15 | 2 | 18.900 | S | 0.500 | -1.280 |
| M02C | 2005 | 219 | 15 | 2 | 27.751 | S | 0.500 | 0.644  |
| OSI  | 2005 | 219 | 15 | 2 | 16.352 | S | 0.500 | -0.550 |
| O04C | 2005 | 219 | 15 | 2 | 31.302 | S | 0.500 | -1.458 |
| SN95 | 2005 | 219 | 15 | 2 | 27.025 | S | 0.500 | -0.008 |

|      |      |     |    |   |        |   |       |        |
|------|------|-----|----|---|--------|---|-------|--------|
| DJJ  | 2005 | 219 | 15 | 2 | 16.032 | S | 0.500 | 0.187  |
| TPH  | 2005 | 219 | 15 | 2 | 47.017 | S | 0.500 | -0.960 |
| VTV  | 2005 | 219 | 15 | 2 | 26.777 | S | 0.500 | -0.769 |
| CIA  | 2005 | 219 | 15 | 2 | 12.439 | S | 0.500 | -0.018 |
| SN73 | 2005 | 219 | 15 | 2 | 24.400 | S | 0.500 | -0.392 |
| PLS  | 2005 | 219 | 15 | 2 | 21.336 | S | 0.500 | 0.103  |
| SN46 | 2005 | 219 | 15 | 2 | 35.908 | S | 0.500 | 1.740  |
| R04C | 2005 | 219 | 15 | 2 | 20.190 | S | 0.500 | -0.766 |
| SN28 | 2005 | 219 | 15 | 2 | 40.439 | S | 0.500 | 0.435  |
| R06C | 2005 | 219 | 15 | 2 | 34.031 | S | 0.500 | 0.113  |
| P05C | 2005 | 219 | 15 | 2 | 29.818 | S | 0.500 | -0.263 |
| SN56 | 2005 | 219 | 15 | 2 | 33.832 | S | 0.500 | 0.626  |
| SN43 | 2005 | 219 | 15 | 2 | 27.288 | S | 0.500 | -0.094 |
| SN52 | 2005 | 219 | 15 | 2 | 23.744 | S | 0.500 | -0.308 |
| PLM  | 2005 | 219 | 15 | 2 | 25.499 | S | 0.500 | 0.508  |
| SN62 | 2005 | 219 | 15 | 2 | 23.738 | S | 0.500 | -0.494 |
| SN53 | 2005 | 219 | 15 | 2 | 26.059 | S | 0.500 | -0.332 |
| SN42 | 2005 | 219 | 15 | 2 | 24.949 | S | 0.500 | -0.344 |
| DGR  | 2005 | 219 | 15 | 2 | 25.482 | S | 0.500 | 0.330  |
| LGU  | 2005 | 219 | 15 | 2 | 10.840 | S | 0.500 | -0.221 |
| SN74 | 2005 | 219 | 15 | 2 | 26.854 | S | 0.500 | -0.276 |
| PAS  | 2005 | 219 | 15 | 2 | 18.099 | S | 0.500 | -0.268 |
| SVD  | 2005 | 219 | 15 | 2 | 27.268 | S | 0.500 | 0.191  |
| SN51 | 2005 | 219 | 15 | 2 | 21.030 | S | 0.500 | -0.493 |
| SBPX | 2005 | 219 | 15 | 2 | 26.268 | S | 0.500 | -0.648 |
| DEC  | 2005 | 219 | 15 | 2 | 17.593 | S | 0.500 | -0.110 |
| DEV  | 2005 | 219 | 15 | 2 | 30.365 | S | 0.500 | 0.064  |
| SN47 | 2005 | 219 | 15 | 2 | 37.578 | S | 0.500 | 1.286  |
| SN38 | 2005 | 219 | 15 | 2 | 40.575 | S | 0.500 | 1.124  |
| LAVA | 2005 | 219 | 15 | 2 | 25.328 | S | 0.500 | -0.229 |
| T06C | 2005 | 219 | 15 | 2 | 21.946 | S | 0.500 | -0.946 |
| GOR  | 2005 | 219 | 15 | 2 | 20.567 | S | 0.500 | -0.180 |
| VCS  | 2005 | 219 | 15 | 2 | 20.024 | S | 0.500 | -0.763 |
| BOR  | 2005 | 219 | 15 | 2 | 28.111 | S | 0.500 | 0.049  |
| SN22 | 2005 | 219 | 15 | 2 | 24.704 | S | 0.500 | -1.144 |
| CHF  | 2005 | 219 | 15 | 2 | 20.158 | S | 0.500 | -0.761 |
| BFS  | 2005 | 219 | 15 | 2 | 23.064 | S | 0.500 | -0.176 |
| SN11 | 2005 | 219 | 15 | 2 | 22.342 | S | 0.500 | -1.552 |
| SN71 | 2005 | 219 | 15 | 2 | 20.384 | S | 0.500 | -0.741 |
| SN27 | 2005 | 219 | 15 | 2 | 37.995 | S | 0.500 | 0.658  |
| GRA  | 2005 | 219 | 15 | 2 | 39.956 | S | 0.500 | -0.787 |
| SN26 | 2005 | 219 | 15 | 2 | 36.326 | S | 0.500 | 0.688  |
| CAP  | 2005 | 219 | 15 | 2 | 22.286 | S | 0.500 | 0.014  |
| SN23 | 2005 | 219 | 15 | 2 | 27.320 | S | 0.500 | -0.502 |

2005 233 9 49 57.0811 -3.99900 -104.02500 10.0000

8 7.001

|      |      |     |    |   |        |   |       |        |
|------|------|-----|----|---|--------|---|-------|--------|
| R07C | 2005 | 233 | 10 | 4 | 40.663 | S | 0.500 | 1.204  |
| VTV  | 2005 | 233 | 10 | 3 | 40.605 | S | 0.500 | -2.993 |
| T05C | 2005 | 233 | 10 | 4 | 31.178 | S | 0.500 | 0.730  |
| GRA  | 2005 | 233 | 10 | 4 | 19.424 | S | 0.500 | 2.155  |
| TIN  | 2005 | 233 | 10 | 4 | 22.199 | S | 0.500 | 0.479  |
| M04C | 2005 | 233 | 10 | 5 | 40.890 | S | 0.500 | 0.712  |
| DBO  | 2005 | 233 | 10 | 5 | 59.635 | S | 0.500 | -3.322 |
| V03C | 2005 | 233 | 10 | 4 | 21.633 | S | 0.500 | -0.262 |
| SBC  | 2005 | 233 | 10 | 3 | 52.268 | S | 0.500 | -0.519 |
| V05C | 2005 | 233 | 10 | 4 | 13.898 | S | 0.500 | 0.689  |
| M06C | 2005 | 233 | 10 | 5 | 28.470 | S | 0.500 | 1.796  |
| ORV  | 2005 | 233 | 10 | 5 | 11.443 | S | 0.500 | 2.130  |
| V04C | 2005 | 233 | 10 | 4 | 14.203 | S | 0.500 | -0.820 |
| FARB | 2005 | 233 | 10 | 4 | 52.376 | S | 0.500 | -0.519 |
| SN42 | 2005 | 233 | 10 | 4 | 27.666 | S | 0.500 | -2.775 |
| O03C | 2005 | 233 | 10 | 5 | 18.184 | S | 0.500 | 0.505  |
| SN44 | 2005 | 233 | 10 | 4 | 31.412 | S | 0.500 | -1.256 |



|      |      |     |    |   |        |   |       |        |
|------|------|-----|----|---|--------|---|-------|--------|
| KCC  | 2005 | 233 | 10 | 4 | 28.100 | S | 0.500 | -2.030 |
| SN37 | 2005 | 233 | 10 | 4 | 34.370 | S | 0.500 | 0.723  |
| MLAC | 2005 | 233 | 10 | 4 | 32.557 | S | 0.500 | 0.254  |
| SN43 | 2005 | 233 | 10 | 4 | 30.190 | S | 0.500 | -2.262 |
| PHL  | 2005 | 233 | 10 | 4 | 9.312  | S | 0.500 | -1.004 |
| T06C | 2005 | 233 | 10 | 4 | 24.286 | S | 0.500 | -3.087 |
| N02C | 2005 | 233 | 10 | 5 | 34.011 | S | 0.500 | -0.412 |
| SN28 | 2005 | 233 | 10 | 4 | 34.864 | S | 0.500 | 1.735  |
| MPP  | 2005 | 233 | 10 | 3 | 59.267 | S | 0.500 | -0.551 |
| SN23 | 2005 | 233 | 10 | 4 | 24.781 | S | 0.500 | -2.426 |
| SN38 | 2005 | 233 | 10 | 4 | 37.771 | S | 0.500 | 1.778  |
| SUTB | 2005 | 233 | 10 | 5 | 6.874  | S | 0.500 | 0.462  |
| S05C | 2005 | 233 | 10 | 4 | 33.546 | S | 0.500 | -1.266 |
| SN26 | 2005 | 233 | 10 | 4 | 30.693 | S | 0.500 | 0.587  |
| RRX  | 2005 | 233 | 10 | 3 | 45.979 | S | 0.500 | -0.505 |
| R04C | 2005 | 233 | 10 | 4 | 50.563 | S | 0.500 | 0.792  |
| LAVA | 2005 | 233 | 10 | 4 | 56.686 | S | 0.500 | 1.049  |
| SMM  | 2005 | 233 | 10 | 4 | 5.711  | S | 0.500 | -0.453 |
| SN52 | 2005 | 233 | 10 | 4 | 29.930 | S | 0.500 | -2.580 |
| SN53 | 2005 | 233 | 10 | 4 | 32.548 | S | 0.500 | -1.855 |
| SN22 | 2005 | 233 | 10 | 4 | 23.356 | S | 0.500 | -2.760 |
| HOPS | 2005 | 233 | 10 | 5 | 11.863 | S | 0.500 | 2.161  |
| SN51 | 2005 | 233 | 10 | 4 | 29.892 | S | 0.500 | -2.671 |
| SN12 | 2005 | 233 | 10 | 4 | 21.704 | S | 0.500 | -1.677 |
| HEC  | 2005 | 233 | 10 | 3 | 43.523 | S | 0.500 | 0.287  |
| HAST | 2005 | 233 | 10 | 4 | 27.896 | S | 0.500 | -0.514 |
| SN45 | 2005 | 233 | 10 | 4 | 33.822 | S | 0.500 | -0.614 |
| SN47 | 2005 | 233 | 10 | 4 | 37.702 | S | 0.500 | 1.055  |
| EDW2 | 2005 | 233 | 10 | 3 | 50.079 | S | 0.500 | -0.856 |
| SN24 | 2005 | 233 | 10 | 4 | 26.994 | S | 0.500 | -1.299 |
| OSI  | 2005 | 233 | 10 | 3 | 50.610 | S | 0.500 | 0.152  |
| SN63 | 2005 | 233 | 10 | 4 | 37.093 | S | 0.500 | -0.898 |
| SN57 | 2005 | 233 | 10 | 4 | 41.110 | S | 0.500 | 1.122  |
| WENL | 2005 | 233 | 10 | 4 | 46.913 | S | 0.500 | 1.616  |
| ARV  | 2005 | 233 | 10 | 3 | 56.076 | S | 0.500 | -1.761 |
| GSC  | 2005 | 233 | 10 | 3 | 51.806 | S | 0.500 | 0.092  |
| SN36 | 2005 | 233 | 10 | 4 | 32.826 | S | 0.500 | 0.338  |
| WVOR | 2005 | 233 | 10 | 5 | 38.429 | S | 0.500 | 2.466  |
| MOD  | 2005 | 233 | 10 | 5 | 37.276 | S | 0.500 | 2.177  |
| PKD  | 2005 | 233 | 10 | 4 | 17.523 | S | 0.500 | 0.011  |
| SN16 | 2005 | 233 | 10 | 4 | 26.703 | S | 0.500 | 0.661  |
| SN11 | 2005 | 233 | 10 | 4 | 18.679 | S | 0.500 | -2.713 |
| SN27 | 2005 | 233 | 10 | 4 | 31.530 | S | 0.500 | 0.926  |
| LRL  | 2005 | 233 | 10 | 3 | 57.293 | S | 0.500 | -0.500 |
| CWC  | 2005 | 233 | 10 | 4 | 14.991 | S | 0.500 | 2.205  |
| BNLO | 2005 | 233 | 10 | 4 | 40.703 | S | 0.500 | -0.793 |
| P05C | 2005 | 233 | 10 | 5 | 3.680  | S | 0.500 | 1.348  |
| PACP | 2005 | 233 | 10 | 4 | 35.319 | S | 0.500 | 0.135  |
| SN46 | 2005 | 233 | 10 | 4 | 35.763 | S | 0.500 | 0.904  |
| O05C | 2005 | 233 | 10 | 5 | 13.020 | S | 0.500 | 0.628  |
| SN15 | 2005 | 233 | 10 | 4 | 26.614 | S | 0.500 | -0.281 |
| MWC  | 2005 | 233 | 10 | 3 | 42.176 | S | 0.500 | -0.072 |
| TOV  | 2005 | 233 | 10 | 3 | 44.037 | S | 0.500 | -0.594 |
| SLA  | 2005 | 233 | 10 | 4 | 2.974  | S | 0.500 | 1.242  |
| SN62 | 2005 | 233 | 10 | 4 | 34.984 | S | 0.500 | -1.723 |
| SN71 | 2005 | 233 | 10 | 4 | 37.935 | S | 0.500 | -1.363 |
| U04C | 2005 | 233 | 10 | 4 | 24.630 | S | 0.500 | 0.560  |
| DEC  | 2005 | 233 | 10 | 3 | 43.166 | S | 0.500 | -0.463 |
| CMB  | 2005 | 233 | 10 | 4 | 43.980 | S | 0.500 | -0.623 |
| R06C | 2005 | 233 | 10 | 4 | 49.270 | S | 0.500 | 2.140  |
| SN25 | 2005 | 233 | 10 | 4 | 28.567 | S | 0.500 | 0.304  |
| MNRC | 2005 | 233 | 10 | 5 | 7.373  | S | 0.500 | 2.175  |
| SN56 | 2005 | 233 | 10 | 4 | 39.030 | S | 0.500 | 0.260  |

|      |      |     |    |   |        |   |       |        |
|------|------|-----|----|---|--------|---|-------|--------|
| SN84 | 2005 | 233 | 10 | 4 | 45.062 | S | 0.500 | -0.149 |
| SN73 | 2005 | 233 | 10 | 4 | 39.213 | S | 0.500 | -1.322 |
| BFS  | 2005 | 233 | 10 | 3 | 40.872 | S | 0.500 | 0.215  |
| SN95 | 2005 | 233 | 10 | 4 | 48.395 | S | 0.500 | 0.253  |
| MPM  | 2005 | 233 | 10 | 4 | 6.641  | S | 0.500 | 1.387  |
| R05C | 2005 | 233 | 10 | 4 | 53.732 | S | 0.500 | 1.248  |
| SN74 | 2005 | 233 | 10 | 4 | 41.320 | S | 0.500 | -0.718 |
| SN76 | 2005 | 233 | 10 | 4 | 46.879 | S | 0.500 | 1.655  |
| SN67 | 2005 | 233 | 10 | 4 | 44.455 | S | 0.500 | 1.737  |
| CHF  | 2005 | 233 | 10 | 3 | 43.397 | S | 0.500 | -0.143 |
| S08C | 2005 | 233 | 10 | 4 | 29.244 | S | 0.500 | 1.220  |
| SHO  | 2005 | 233 | 10 | 3 | 58.788 | S | 0.500 | 1.107  |
| SN66 | 2005 | 233 | 10 | 4 | 43.145 | S | 0.500 | 0.998  |
| VCS  | 2005 | 233 | 10 | 3 | 45.546 | S | 0.500 | -0.633 |
| S04C | 2005 | 233 | 10 | 4 | 42.615 | S | 0.500 | 0.871  |
| O04C | 2005 | 233 | 10 | 5 | 18.895 | S | 0.500 | 1.142  |
| ISA  | 2005 | 233 | 10 | 4 | 4.239  | S | 0.500 | 0.374  |
| SN86 | 2005 | 233 | 10 | 4 | 49.554 | S | 0.500 | 1.089  |

|      |     |   |    |         |          |           |          |   |       |
|------|-----|---|----|---------|----------|-----------|----------|---|-------|
| 2005 | 269 | 1 | 55 | 43.3264 | -5.67800 | -76.39800 | 115.0000 | 9 | 5.656 |
|------|-----|---|----|---------|----------|-----------|----------|---|-------|

|      |      |     |   |    |        |   |       |        |
|------|------|-----|---|----|--------|---|-------|--------|
| ARV  | 2005 | 269 | 2 | 13 | 1.855  | S | 0.500 | -0.126 |
| JCS  | 2005 | 269 | 2 | 12 | 27.789 | S | 0.500 | 1.505  |
| SDD  | 2005 | 269 | 2 | 12 | 40.790 | S | 0.500 | 1.355  |
| M04C | 2005 | 269 | 2 | 14 | 16.864 | S | 0.500 | -0.734 |
| V05C | 2005 | 269 | 2 | 13 | 16.979 | S | 0.500 | -0.129 |
| SN22 | 2005 | 269 | 2 | 13 | 19.341 | S | 0.500 | -2.148 |
| M02C | 2005 | 269 | 2 | 14 | 18.880 | S | 0.500 | -3.442 |
| MOD  | 2005 | 269 | 2 | 14 | 7.140  | S | 0.500 | 0.048  |
| SN23 | 2005 | 269 | 2 | 13 | 19.881 | S | 0.500 | -1.519 |
| V03C | 2005 | 269 | 2 | 13 | 29.490 | S | 0.500 | -0.148 |
| ADO  | 2005 | 269 | 2 | 12 | 45.265 | S | 0.500 | -0.268 |
| EDW2 | 2005 | 269 | 2 | 12 | 52.312 | S | 0.500 | -0.791 |
| SN44 | 2005 | 269 | 2 | 13 | 24.439 | S | 0.500 | -0.517 |
| SN21 | 2005 | 269 | 2 | 13 | 18.011 | S | 0.500 | -2.923 |
| TIN  | 2005 | 269 | 2 | 13 | 13.128 | S | 0.500 | 0.686  |
| JRSC | 2005 | 269 | 2 | 13 | 48.605 | S | 0.500 | 0.561  |
| SN73 | 2005 | 269 | 2 | 13 | 33.324 | S | 0.500 | -0.709 |
| R04C | 2005 | 269 | 2 | 13 | 44.069 | S | 0.500 | 0.373  |
| M05C | 2005 | 269 | 2 | 14 | 8.341  | S | 0.500 | -0.794 |
| FARB | 2005 | 269 | 2 | 13 | 56.162 | S | 0.500 | -0.496 |
| M03C | 2005 | 269 | 2 | 14 | 13.254 | S | 0.500 | -2.602 |
| SUTB | 2005 | 269 | 2 | 13 | 57.676 | S | 0.500 | -0.188 |
| Q04C | 2005 | 269 | 2 | 13 | 52.153 | S | 0.500 | 0.465  |
| WVOR | 2005 | 269 | 2 | 13 | 58.158 | S | 0.500 | -1.160 |
| SMM  | 2005 | 269 | 2 | 13 | 13.985 | S | 0.500 | 0.286  |
| HATC | 2005 | 269 | 2 | 14 | 6.266  | S | 0.500 | -1.153 |
| P01C | 2005 | 269 | 2 | 14 | 12.434 | S | 0.500 | 0.290  |
| SAO  | 2005 | 269 | 2 | 13 | 36.286 | S | 0.500 | -0.651 |
| SHO  | 2005 | 269 | 2 | 12 | 47.410 | S | 0.500 | 0.795  |
| SN11 | 2005 | 269 | 2 | 13 | 15.896 | S | 0.500 | -2.457 |
| CWC  | 2005 | 269 | 2 | 13 | 7.971  | S | 0.500 | 1.513  |
| S05C | 2005 | 269 | 2 | 13 | 30.220 | S | 0.500 | -1.609 |
| VTV  | 2005 | 269 | 2 | 12 | 44.448 | S | 0.500 | -0.361 |
| PLM  | 2005 | 269 | 2 | 12 | 32.452 | S | 0.500 | 1.381  |
| RCT  | 2005 | 269 | 2 | 13 | 12.982 | S | 0.500 | -1.829 |
| S04C | 2005 | 269 | 2 | 13 | 41.982 | S | 0.500 | 0.730  |
| CMB  | 2005 | 269 | 2 | 13 | 37.830 | S | 0.500 | 0.007  |
| SN74 | 2005 | 269 | 2 | 13 | 34.080 | S | 0.500 | 0.187  |
| U04C | 2005 | 269 | 2 | 13 | 27.406 | S | 0.500 | -0.875 |
| SNCC | 2005 | 269 | 2 | 12 | 54.353 | S | 0.500 | 0.714  |
| ELFS | 2005 | 269 | 2 | 13 | 59.644 | S | 0.500 | -0.870 |
| DEC  | 2005 | 269 | 2 | 12 | 50.899 | S | 0.500 | -0.050 |
| MPP  | 2005 | 269 | 2 | 13 | 8.601  | S | 0.500 | -0.496 |

|      |      |     |   |    |        |   |       |        |
|------|------|-----|---|----|--------|---|-------|--------|
| SN63 | 2005 | 269 | 2 | 13 | 30.569 | S | 0.500 | -0.385 |
| DGR  | 2005 | 269 | 2 | 12 | 36.168 | S | 0.500 | 1.573  |
| SDP  | 2005 | 269 | 2 | 13 | 11.862 | S | 0.500 | -0.570 |
| V04C | 2005 | 269 | 2 | 13 | 23.786 | S | 0.500 | 0.069  |
| OSI  | 2005 | 269 | 2 | 12 | 57.049 | S | 0.500 | -0.195 |
| MWC  | 2005 | 269 | 2 | 12 | 48.802 | S | 0.500 | 0.303  |
| N02C | 2005 | 269 | 2 | 14 | 19.031 | S | 0.500 | -2.596 |
| T06C | 2005 | 269 | 2 | 13 | 21.137 | S | 0.500 | -2.983 |
| M06C | 2005 | 269 | 2 | 14 | 2.364  | S | 0.500 | -0.525 |
| SN54 | 2005 | 269 | 2 | 13 | 28.639 | S | 0.500 | 0.067  |
| BNLO | 2005 | 269 | 2 | 13 | 45.590 | S | 0.500 | -0.283 |
| O04C | 2005 | 269 | 2 | 13 | 59.978 | S | 0.500 | -0.878 |
| SN34 | 2005 | 269 | 2 | 13 | 21.863 | S | 0.500 | -0.391 |
| LAVA | 2005 | 269 | 2 | 13 | 46.394 | S | 0.500 | 0.285  |
| P05C | 2005 | 269 | 2 | 13 | 49.612 | S | 0.500 | 0.223  |
| HELL | 2005 | 269 | 2 | 13 | 14.998 | S | 0.500 | -1.041 |
| RRX  | 2005 | 269 | 2 | 12 | 44.773 | S | 0.500 | 0.348  |
| PKD  | 2005 | 269 | 2 | 13 | 22.608 | S | 0.500 | -0.534 |
| HAST | 2005 | 269 | 2 | 13 | 34.544 | S | 0.500 | -0.538 |
| SN75 | 2005 | 269 | 2 | 13 | 34.254 | S | 0.500 | 0.866  |
| SN84 | 2005 | 269 | 2 | 13 | 37.136 | S | 0.500 | 0.140  |
| SN12 | 2005 | 269 | 2 | 13 | 17.031 | S | 0.500 | -1.020 |
| SN95 | 2005 | 269 | 2 | 13 | 39.658 | S | 0.500 | 0.339  |
| VES  | 2005 | 269 | 2 | 13 | 9.594  | S | 0.500 | -0.207 |
| MLAC | 2005 | 269 | 2 | 13 | 23.583 | S | 0.500 | 1.315  |
| SLA  | 2005 | 269 | 2 | 12 | 56.363 | S | 0.500 | 1.156  |
| SN25 | 2005 | 269 | 2 | 13 | 19.698 | S | 0.500 | 0.588  |
| PAS  | 2005 | 269 | 2 | 12 | 49.390 | S | 0.500 | 0.749  |
| SBC  | 2005 | 269 | 2 | 13 | 4.460  | S | 0.500 | 0.036  |
| VCS  | 2005 | 269 | 2 | 12 | 50.598 | S | 0.500 | -0.433 |
| CHF  | 2005 | 269 | 2 | 12 | 49.097 | S | 0.500 | 0.043  |
| SN64 | 2005 | 269 | 2 | 13 | 30.691 | S | 0.500 | -0.135 |
| O05C | 2005 | 269 | 2 | 13 | 56.091 | S | 0.500 | -0.612 |
| HEC  | 2005 | 269 | 2 | 12 | 38.952 | S | 0.500 | 0.554  |
| R07C | 2005 | 269 | 2 | 13 | 29.341 | S | 0.500 | 1.799  |
| SN85 | 2005 | 269 | 2 | 13 | 37.140 | S | 0.500 | 0.589  |
| SN26 | 2005 | 269 | 2 | 13 | 19.650 | S | 0.500 | 0.662  |
| SN71 | 2005 | 269 | 2 | 13 | 33.651 | S | 0.500 | -1.097 |
| SN24 | 2005 | 269 | 2 | 13 | 20.147 | S | 0.500 | -0.561 |
| GRA  | 2005 | 269 | 2 | 13 | 5.822  | S | 0.500 | 0.895  |
| FUR  | 2005 | 269 | 2 | 12 | 57.170 | S | 0.500 | 0.968  |
| SN56 | 2005 | 269 | 2 | 13 | 29.255 | S | 0.500 | 1.305  |
| SN15 | 2005 | 269 | 2 | 13 | 17.942 | S | 0.500 | 0.251  |
| PHL  | 2005 | 269 | 2 | 13 | 19.232 | S | 0.500 | 0.064  |
| GSC  | 2005 | 269 | 2 | 12 | 47.282 | S | 0.500 | 0.903  |
| SN45 | 2005 | 269 | 2 | 13 | 25.443 | S | 0.500 | 0.540  |
| SN36 | 2005 | 269 | 2 | 13 | 22.031 | S | 0.500 | 0.657  |
| SN65 | 2005 | 269 | 2 | 13 | 31.456 | S | 0.500 | 0.511  |
| R05C | 2005 | 269 | 2 | 13 | 41.868 | S | 0.500 | 0.944  |
| PACP | 2005 | 269 | 2 | 13 | 37.077 | S | 0.500 | -0.363 |
| SN55 | 2005 | 269 | 2 | 13 | 29.170 | S | 0.500 | 0.653  |
| LGU  | 2005 | 269 | 2 | 12 | 56.586 | S | 0.500 | 0.370  |
| CIA  | 2005 | 269 | 2 | 12 | 45.642 | S | 0.500 | 0.687  |
| BBR  | 2005 | 269 | 2 | 12 | 40.218 | S | 0.500 | 1.256  |
| ISA  | 2005 | 269 | 2 | 13 | 4.868  | S | 0.500 | 1.384  |
| SVD  | 2005 | 269 | 2 | 12 | 40.481 | S | 0.500 | 1.570  |
| TOV  | 2005 | 269 | 2 | 12 | 54.649 | S | 0.500 | 0.242  |
| ORV  | 2005 | 269 | 2 | 13 | 57.572 | S | 0.500 | -0.309 |
| SN47 | 2005 | 269 | 2 | 13 | 25.578 | S | 0.500 | 1.449  |
| GASB | 2005 | 269 | 2 | 14 | 8.601  | S | 0.500 | 0.012  |
| RPV  | 2005 | 269 | 2 | 12 | 48.534 | S | 0.500 | 1.049  |
| LRL  | 2005 | 269 | 2 | 12 | 56.194 | S | 0.500 | 0.919  |
| SN38 | 2005 | 269 | 2 | 13 | 22.701 | S | 0.500 | 1.025  |

|      |      |     |   |    |        |   |       |        |
|------|------|-----|---|----|--------|---|-------|--------|
| SN37 | 2005 | 269 | 2 | 13 | 22.544 | S | 0.500 | 1.226  |
| MNV  | 2005 | 269 | 2 | 13 | 23.527 | S | 0.500 | 0.390  |
| SN57 | 2005 | 269 | 2 | 13 | 28.935 | S | 0.500 | 1.432  |
| SN14 | 2005 | 269 | 2 | 13 | 18.058 | S | 0.500 | -0.175 |
| SN46 | 2005 | 269 | 2 | 13 | 25.688 | S | 0.500 | 1.460  |
| DJJ  | 2005 | 269 | 2 | 12 | 51.645 | S | 0.500 | 0.733  |
| R06C | 2005 | 269 | 2 | 13 | 36.102 | S | 0.500 | 1.816  |
| SN48 | 2005 | 269 | 2 | 13 | 25.642 | S | 0.500 | 1.402  |
| BFS  | 2005 | 269 | 2 | 12 | 45.786 | S | 0.500 | 0.605  |
| SN86 | 2005 | 269 | 2 | 13 | 38.444 | S | 0.500 | 1.283  |
| S08C | 2005 | 269 | 2 | 13 | 17.011 | S | 0.500 | 0.924  |
| FMP  | 2005 | 269 | 2 | 12 | 47.613 | S | 0.500 | 1.264  |
| SN16 | 2005 | 269 | 2 | 13 | 15.932 | S | 0.500 | 0.642  |
| SN27 | 2005 | 269 | 2 | 13 | 19.468 | S | 0.500 | 0.877  |
| MPM  | 2005 | 269 | 2 | 12 | 59.951 | S | 0.500 | 1.427  |
| SN28 | 2005 | 269 | 2 | 13 | 19.883 | S | 0.500 | 0.919  |
| SN67 | 2005 | 269 | 2 | 13 | 31.541 | S | 0.500 | 1.414  |
| SN66 | 2005 | 269 | 2 | 13 | 32.317 | S | 0.500 | 1.475  |
| DBO  | 2005 | 269 | 2 | 14 | 33.900 | S | 0.500 | -3.668 |
| U05C | 2005 | 269 | 2 | 13 | 20.845 | S | 0.500 | -1.587 |
| HUMO | 2005 | 269 | 2 | 14 | 28.133 | S | 0.500 | -3.637 |
| HOPS | 2005 | 269 | 2 | 14 | 8.552  | S | 0.500 | 2.221  |
| Q03C | 2005 | 269 | 2 | 13 | 57.516 | S | 0.500 | 2.211  |
| SN52 | 2005 | 269 | 2 | 13 | 25.871 | S | 0.500 | -1.775 |
| SN43 | 2005 | 269 | 2 | 13 | 24.923 | S | 0.500 | -1.023 |
| KCC  | 2005 | 269 | 2 | 13 | 22.267 | S | 0.500 | -1.390 |
| PIN  | 2005 | 269 | 2 | 14 | 25.780 | S | 0.500 | -0.417 |
| BDM  | 2005 | 269 | 2 | 13 | 50.632 | S | 0.500 | 1.508  |
| SN53 | 2005 | 269 | 2 | 13 | 27.315 | S | 0.500 | -0.735 |
| YBH  | 2005 | 269 | 2 | 14 | 20.657 | S | 0.500 | -3.034 |
| T05C | 2005 | 269 | 2 | 13 | 30.973 | S | 0.500 | -0.305 |
| CVS  | 2005 | 269 | 2 | 13 | 57.104 | S | 0.500 | 0.283  |
| O03C | 2005 | 269 | 2 | 14 | 3.132  | S | 0.500 | -2.322 |
| SN42 | 2005 | 269 | 2 | 13 | 23.183 | S | 0.500 | -1.973 |
| USC  | 2005 | 269 | 2 | 12 | 50.074 | S | 0.500 | 1.417  |
| SN62 | 2005 | 269 | 2 | 13 | 30.081 | S | 0.500 | -1.105 |
| SN51 | 2005 | 269 | 2 | 13 | 26.872 | S | 0.500 | -2.129 |
| MNRC | 2005 | 269 | 2 | 14 | 2.257  | S | 0.500 | 1.726  |
| BAK  | 2005 | 269 | 2 | 13 | 7.266  | S | 0.500 | 1.071  |

|      |      |     |    |         |           |            |         |        |       |
|------|------|-----|----|---------|-----------|------------|---------|--------|-------|
| 2005 | 278  | 10  | 7  | 24.8835 | -20.53500 | -174.27699 | 15.0000 | 10     | 2.514 |
| SN51 | 2005 | 278 | 10 | 29      | 4.330     | S          | 0.500   | 0.107  |       |
| SN36 | 2005 | 278 | 10 | 29      | 18.158    | S          | 0.500   | 0.889  |       |
| SN12 | 2005 | 278 | 10 | 29      | 8.243     | S          | 0.500   | -1.116 |       |
| SN22 | 2005 | 278 | 10 | 29      | 7.017     | S          | 0.500   | -0.791 |       |
| R05C | 2005 | 278 | 10 | 29      | 14.371    | S          | 0.500   | -0.158 |       |
| SN65 | 2005 | 278 | 10 | 29      | 13.548    | S          | 0.500   | -0.285 |       |
| SN52 | 2005 | 278 | 10 | 29      | 6.480     | S          | 0.500   | -0.157 |       |
| SN34 | 2005 | 278 | 10 | 29      | 12.774    | S          | 0.500   | 0.210  |       |
| S08C | 2005 | 278 | 10 | 29      | 20.202    | S          | 0.500   | 0.844  |       |
| MPM  | 2005 | 278 | 10 | 29      | 15.187    | S          | 0.500   | 0.684  |       |
| SN11 | 2005 | 278 | 10 | 29      | 4.057     | S          | 0.500   | -1.474 |       |
| SN62 | 2005 | 278 | 10 | 29      | 7.171     | S          | 0.500   | -0.007 |       |
| SN14 | 2005 | 278 | 10 | 29      | 12.509    | S          | 0.500   | -0.469 |       |
| HELL | 2005 | 278 | 10 | 29      | 6.511     | S          | 0.500   | -1.363 |       |
| SN45 | 2005 | 278 | 10 | 29      | 14.982    | S          | 0.500   | 0.618  |       |
| SN37 | 2005 | 278 | 10 | 29      | 19.614    | S          | 0.500   | 0.812  |       |
| SN24 | 2005 | 278 | 10 | 29      | 12.247    | S          | 0.500   | -0.002 |       |
| SN25 | 2005 | 278 | 10 | 29      | 15.383    | S          | 0.500   | 0.508  |       |
| SN23 | 2005 | 278 | 10 | 29      | 9.216     | S          | 0.500   | -0.583 |       |
| BMN  | 2005 | 278 | 10 | 29      | 42.106    | S          | 0.500   | -1.837 |       |
| PAS  | 2005 | 278 | 10 | 28      | 56.550    | S          | 0.500   | -0.374 |       |
| R07C | 2005 | 278 | 10 | 29      | 17.722    | S          | 0.500   | 0.529  |       |

|      |      |     |    |    |          |       |        |
|------|------|-----|----|----|----------|-------|--------|
| WVOR | 2005 | 278 | 10 | 29 | 47.028 S | 0.500 | -0.644 |
| FUR  | 2005 | 278 | 10 | 29 | 20.347 S | 0.500 | -0.584 |
| SN56 | 2005 | 278 | 10 | 29 | 16.193 S | 0.500 | 0.354  |
| GSC  | 2005 | 278 | 10 | 29 | 14.003 S | 0.500 | -0.346 |
| SN16 | 2005 | 278 | 10 | 29 | 18.109 S | 0.500 | 0.361  |
| EDW2 | 2005 | 278 | 10 | 29 | 2.332 S  | 0.500 | -0.753 |
| SN28 | 2005 | 278 | 10 | 29 | 22.531 S | 0.500 | 0.739  |
| SN95 | 2005 | 278 | 10 | 29 | 10.647 S | 0.500 | -0.104 |
| SN67 | 2005 | 278 | 10 | 29 | 18.440 S | 0.500 | 0.570  |
| ORV  | 2005 | 278 | 10 | 29 | 10.154 S | 0.500 | -0.394 |
| SN47 | 2005 | 278 | 10 | 29 | 19.763 S | 0.500 | 1.140  |
| SN71 | 2005 | 278 | 10 | 29 | 4.219 S  | 0.500 | -0.205 |
| SHO  | 2005 | 278 | 10 | 29 | 21.763 S | 0.500 | -0.126 |
| SN46 | 2005 | 278 | 10 | 29 | 18.162 S | 0.500 | 1.721  |
| SN27 | 2005 | 278 | 10 | 29 | 19.536 S | 0.500 | 0.464  |
| SLA  | 2005 | 278 | 10 | 29 | 14.899 S | 0.500 | -0.030 |
| SN38 | 2005 | 278 | 10 | 29 | 22.688 S | 0.500 | 1.200  |
| SN43 | 2005 | 278 | 10 | 29 | 9.629 S  | 0.500 | -0.160 |
| SN26 | 2005 | 278 | 10 | 29 | 18.195 S | 0.500 | 0.780  |
| ISA  | 2005 | 278 | 10 | 29 | 5.219 S  | 0.500 | 0.409  |
| SN53 | 2005 | 278 | 10 | 29 | 8.929 S  | 0.500 | -0.100 |
| SN21 | 2005 | 278 | 10 | 29 | 4.396 S  | 0.500 | -0.762 |
| SN54 | 2005 | 278 | 10 | 29 | 11.811 S | 0.500 | 0.091  |
| P05C | 2005 | 278 | 10 | 29 | 14.366 S | 0.500 | -0.438 |
| T06C | 2005 | 278 | 10 | 29 | 4.924 S  | 0.500 | -0.227 |
| SN48 | 2005 | 278 | 10 | 29 | 22.093 S | 0.500 | 1.121  |
| SN15 | 2005 | 278 | 10 | 29 | 15.158 S | 0.500 | 0.287  |
| CMB  | 2005 | 278 | 10 | 29 | 7.724 S  | 0.500 | 0.273  |
| SN73 | 2005 | 278 | 10 | 29 | 7.706 S  | 0.500 | -0.302 |
| SN64 | 2005 | 278 | 10 | 29 | 11.535 S | 0.500 | -0.211 |
| JCS  | 2005 | 278 | 10 | 29 | 1.695 S  | 0.500 | -0.499 |
| SN86 | 2005 | 278 | 10 | 29 | 14.857 S | 0.500 | -0.178 |
| LAVA | 2005 | 278 | 10 | 29 | 9.955 S  | 0.500 | -0.033 |

|      |      |     |    |        |           |           |          |    |       |
|------|------|-----|----|--------|-----------|-----------|----------|----|-------|
| 2005 | 321  | 19  | 27 | 0.0359 | -22.36100 | -67.89500 | 147.0000 | 11 | 5.546 |
| SN11 | 2005 | 321 | 19 | 48     | 1.599 S   | 0.500     | -2.581   |    |       |
| Q03C | 2005 | 321 | 19 | 48     | 37.084 S  | 0.500     | 1.777    |    |       |
| M03C | 2005 | 321 | 19 | 48     | 50.847 S  | 0.500     | -3.017   |    |       |
| O03C | 2005 | 321 | 19 | 48     | 41.554 S  | 0.500     | -2.985   |    |       |
| SDD  | 2005 | 321 | 19 | 47     | 31.559 S  | 0.500     | 1.611    |    |       |
| SUTB | 2005 | 321 | 19 | 48     | 37.226 S  | 0.500     | -0.642   |    |       |
| ELFS | 2005 | 321 | 19 | 48     | 40.521 S  | 0.500     | -0.798   |    |       |
| M02C | 2005 | 321 | 19 | 48     | 55.989 S  | 0.500     | -3.045   |    |       |
| M05C | 2005 | 321 | 19 | 48     | 47.944 S  | 0.500     | -0.670   |    |       |
| O04C | 2005 | 321 | 19 | 48     | 40.098 S  | 0.500     | -1.135   |    |       |
| GASB | 2005 | 321 | 19 | 48     | 46.580 S  | 0.500     | -0.105   |    |       |
| YBH  | 2005 | 321 | 19 | 48     | 57.743 S  | 0.500     | -2.612   |    |       |
| ORV  | 2005 | 321 | 19 | 48     | 37.445 S  | 0.500     | -0.675   |    |       |
| LGU  | 2005 | 321 | 19 | 47     | 43.660 S  | 0.500     | -0.128   |    |       |
| T05C | 2005 | 321 | 19 | 48     | 14.753 S  | 0.500     | 0.178    |    |       |
| DGR  | 2005 | 321 | 19 | 47     | 28.003 S  | 0.500     | 1.646    |    |       |
| BAK  | 2005 | 321 | 19 | 47     | 54.124 S  | 0.500     | 0.906    |    |       |
| BDM  | 2005 | 321 | 19 | 48     | 30.198 S  | 0.500     | 0.454    |    |       |
| WVOR | 2005 | 321 | 19 | 48     | 41.996 S  | 0.500     | 0.294    |    |       |
| JCS  | 2005 | 321 | 19 | 47     | 19.978 S  | 0.500     | 0.878    |    |       |
| PLM  | 2005 | 321 | 19 | 47     | 24.855 S  | 0.500     | 1.614    |    |       |
| FUR  | 2005 | 321 | 19 | 47     | 47.625 S  | 0.500     | 1.065    |    |       |
| M06C | 2005 | 321 | 19 | 48     | 43.465 S  | 0.500     | -0.098   |    |       |
| Q04C | 2005 | 321 | 19 | 48     | 32.608 S  | 0.500     | -0.039   |    |       |
| SLA  | 2005 | 321 | 19 | 47     | 46.056 S  | 0.500     | 0.835    |    |       |
| FMP  | 2005 | 321 | 19 | 47     | 36.590 S  | 0.500     | 0.942    |    |       |
| SDP  | 2005 | 321 | 19 | 47     | 56.686 S  | 0.500     | -0.386   |    |       |
| LAVA | 2005 | 321 | 19 | 48     | 28.206 S  | 0.500     | -0.020   |    |       |

|      |      |     |    |    |        |   |       |        |
|------|------|-----|----|----|--------|---|-------|--------|
| JRSC | 2005 | 321 | 19 | 48 | 28.130 | S | 0.500 | -0.087 |
| RCT  | 2005 | 321 | 19 | 47 | 58.733 | S | 0.500 | -2.372 |
| V05C | 2005 | 321 | 19 | 48 | 2.396  | S | 0.500 | -0.032 |
| VES  | 2005 | 321 | 19 | 47 | 56.538 | S | 0.500 | -0.106 |
| TOV  | 2005 | 321 | 19 | 47 | 42.727 | S | 0.500 | 0.286  |
| O05C | 2005 | 321 | 19 | 48 | 36.907 | S | 0.500 | -0.722 |
| MLAC | 2005 | 321 | 19 | 48 | 9.292  | S | 0.500 | 0.894  |
| V03C | 2005 | 321 | 19 | 48 | 12.498 | S | 0.500 | 0.219  |
| MUR  | 2005 | 321 | 19 | 47 | 28.651 | S | 0.500 | 1.440  |
| BNLO | 2005 | 321 | 19 | 48 | 25.692 | S | 0.500 | -0.716 |
| TIN  | 2005 | 321 | 19 | 48 | 0.833  | S | 0.500 | 0.798  |
| SMM  | 2005 | 321 | 19 | 47 | 59.433 | S | 0.500 | 0.421  |
| DEC  | 2005 | 321 | 19 | 47 | 39.921 | S | 0.500 | 0.063  |
| GSC  | 2005 | 321 | 19 | 47 | 38.604 | S | 0.500 | 0.916  |
| HEC  | 2005 | 321 | 19 | 47 | 31.771 | S | 0.500 | 0.917  |
| P05C | 2005 | 321 | 19 | 48 | 30.975 | S | 0.500 | -0.331 |
| SHO  | 2005 | 321 | 19 | 47 | 39.445 | S | 0.500 | 1.019  |
| DJJ  | 2005 | 321 | 19 | 47 | 40.349 | S | 0.500 | 0.616  |
| OSI  | 2005 | 321 | 19 | 47 | 45.017 | S | 0.500 | -0.287 |
| VTV  | 2005 | 321 | 19 | 47 | 35.124 | S | 0.500 | -0.393 |
| RPV  | 2005 | 321 | 19 | 47 | 37.584 | S | 0.500 | 1.094  |
| SVD  | 2005 | 321 | 19 | 47 | 31.976 | S | 0.500 | 1.705  |
| S05C | 2005 | 321 | 19 | 48 | 14.473 | S | 0.500 | -1.043 |
| LRL  | 2005 | 321 | 19 | 47 | 45.662 | S | 0.500 | 0.877  |
| U04C | 2005 | 321 | 19 | 48 | 11.604 | S | 0.500 | -0.011 |
| RRX  | 2005 | 321 | 19 | 47 | 36.097 | S | 0.500 | 0.461  |
| GRA  | 2005 | 321 | 19 | 47 | 55.326 | S | 0.500 | 1.248  |
| SN14 | 2005 | 321 | 19 | 48 | 4.450  | S | 0.500 | -0.426 |
| CHF  | 2005 | 321 | 19 | 47 | 38.721 | S | 0.500 | 0.216  |
| SN43 | 2005 | 321 | 19 | 48 | 9.837  | S | 0.500 | -1.250 |
| SNCC | 2005 | 321 | 19 | 47 | 40.968 | S | 0.500 | 0.359  |
| BBR  | 2005 | 321 | 19 | 47 | 31.868 | S | 0.500 | 1.289  |
| KCC  | 2005 | 321 | 19 | 48 | 7.730  | S | 0.500 | -1.432 |
| SN53 | 2005 | 321 | 19 | 48 | 11.930 | S | 0.500 | -0.850 |
| R05C | 2005 | 321 | 19 | 48 | 24.656 | S | 0.500 | 0.383  |
| SN25 | 2005 | 321 | 19 | 48 | 5.868  | S | 0.500 | 0.198  |
| BFS  | 2005 | 321 | 19 | 47 | 36.103 | S | 0.500 | 0.687  |
| VCS  | 2005 | 321 | 19 | 47 | 39.827 | S | 0.500 | -0.525 |
| MPM  | 2005 | 321 | 19 | 47 | 49.319 | S | 0.500 | 1.212  |
| SN44 | 2005 | 321 | 19 | 48 | 9.810  | S | 0.500 | -0.603 |
| SN23 | 2005 | 321 | 19 | 48 | 5.554  | S | 0.500 | -1.664 |
| R04C | 2005 | 321 | 19 | 48 | 25.905 | S | 0.500 | 0.175  |
| SN22 | 2005 | 321 | 19 | 48 | 4.623  | S | 0.500 | -2.496 |
| CIA  | 2005 | 321 | 19 | 47 | 34.850 | S | 0.500 | 0.789  |
| V04C | 2005 | 321 | 19 | 48 | 7.496  | S | 0.500 | 0.169  |
| S04C | 2005 | 321 | 19 | 48 | 23.905 | S | 0.500 | 0.871  |
| PAS  | 2005 | 321 | 19 | 47 | 38.721 | S | 0.500 | 0.807  |
| PKD  | 2005 | 321 | 19 | 48 | 6.749  | S | 0.500 | -0.479 |
| SN15 | 2005 | 321 | 19 | 48 | 4.751  | S | 0.500 | 0.191  |
| EDW2 | 2005 | 321 | 19 | 47 | 41.579 | S | 0.500 | -0.802 |
| ARV  | 2005 | 321 | 19 | 47 | 49.683 | S | 0.500 | 0.160  |
| T06C | 2005 | 321 | 19 | 48 | 5.898  | S | 0.500 | -3.204 |
| SN12 | 2005 | 321 | 19 | 48 | 3.044  | S | 0.500 | -1.259 |
| SN95 | 2005 | 321 | 19 | 48 | 22.439 | S | 0.500 | -0.151 |
| MWC  | 2005 | 321 | 19 | 47 | 38.315 | S | 0.500 | 0.339  |
| MPP  | 2005 | 321 | 19 | 47 | 54.675 | S | 0.500 | -0.229 |
| SN85 | 2005 | 321 | 19 | 48 | 20.570 | S | 0.500 | 0.257  |
| SN55 | 2005 | 321 | 19 | 48 | 13.998 | S | 0.500 | 0.348  |
| SN45 | 2005 | 321 | 19 | 48 | 10.837 | S | 0.500 | 0.161  |
| HELL | 2005 | 321 | 19 | 48 | 1.083  | S | 0.500 | -1.364 |
| SN21 | 2005 | 321 | 19 | 48 | 3.232  | S | 0.500 | -3.128 |
| HAST | 2005 | 321 | 19 | 48 | 17.053 | S | 0.500 | 0.035  |
| CWC  | 2005 | 321 | 19 | 47 | 55.740 | S | 0.500 | 1.015  |

|      |      |     |    |    |        |   |       |        |
|------|------|-----|----|----|--------|---|-------|--------|
| SN28 | 2005 | 321 | 19 | 48 | 6.874  | S | 0.500 | 0.758  |
| SN26 | 2005 | 321 | 19 | 48 | 6.004  | S | 0.500 | 0.239  |
| SN46 | 2005 | 321 | 19 | 48 | 11.278 | S | 0.500 | 1.096  |
| SN47 | 2005 | 321 | 19 | 48 | 11.380 | S | 0.500 | 1.174  |
| SN86 | 2005 | 321 | 19 | 48 | 21.936 | S | 0.500 | 0.892  |
| SN27 | 2005 | 321 | 19 | 48 | 6.245  | S | 0.500 | 0.670  |
| SN54 | 2005 | 321 | 19 | 48 | 13.448 | S | 0.500 | -0.002 |
| PACP | 2005 | 321 | 19 | 48 | 19.632 | S | 0.500 | 0.072  |
| R07C | 2005 | 321 | 19 | 48 | 14.470 | S | 0.500 | 1.475  |
| SN37 | 2005 | 321 | 19 | 48 | 8.776  | S | 0.500 | 0.936  |
| SN48 | 2005 | 321 | 19 | 48 | 11.649 | S | 0.500 | 1.150  |
| SN64 | 2005 | 321 | 19 | 48 | 15.232 | S | 0.500 | -0.161 |
| SN52 | 2005 | 321 | 19 | 48 | 10.244 | S | 0.500 | -2.001 |
| R06C | 2005 | 321 | 19 | 48 | 20.333 | S | 0.500 | 1.572  |
| SN67 | 2005 | 321 | 19 | 48 | 16.759 | S | 0.500 | 1.475  |
| SN34 | 2005 | 321 | 19 | 48 | 7.634  | S | 0.500 | -0.533 |
| SN76 | 2005 | 321 | 19 | 48 | 19.616 | S | 0.500 | 1.512  |
| SN36 | 2005 | 321 | 19 | 48 | 8.133  | S | 0.500 | 0.316  |
| SN66 | 2005 | 321 | 19 | 48 | 17.076 | S | 0.500 | 1.347  |
| SN38 | 2005 | 321 | 19 | 48 | 9.345  | S | 0.500 | 1.016  |
| S08C | 2005 | 321 | 19 | 48 | 4.264  | S | 0.500 | 0.818  |
| SN51 | 2005 | 321 | 19 | 48 | 11.314 | S | 0.500 | -1.970 |
| SN84 | 2005 | 321 | 19 | 48 | 20.316 | S | 0.500 | -0.183 |
| S06C | 2005 | 321 | 19 | 48 | 16.128 | S | 0.500 | -0.471 |
| CMB  | 2005 | 321 | 19 | 48 | 20.769 | S | 0.500 | -0.289 |
| PHL  | 2005 | 321 | 19 | 48 | 3.449  | S | 0.500 | -0.040 |
| SN16 | 2005 | 321 | 19 | 48 | 3.242  | S | 0.500 | 0.611  |
| SN75 | 2005 | 321 | 19 | 48 | 18.135 | S | 0.500 | 0.423  |
| SN56 | 2005 | 321 | 19 | 48 | 14.253 | S | 0.500 | 0.974  |
| SN62 | 2005 | 321 | 19 | 48 | 13.968 | S | 0.500 | -1.318 |
| SN73 | 2005 | 321 | 19 | 48 | 17.027 | S | 0.500 | -0.782 |
| SN65 | 2005 | 321 | 19 | 48 | 15.944 | S | 0.500 | 0.243  |
| SN71 | 2005 | 321 | 19 | 48 | 17.198 | S | 0.500 | -0.954 |

|      |      |     |    |         |          |           |         |        |       |
|------|------|-----|----|---------|----------|-----------|---------|--------|-------|
| 2005 | 249  | 1   | 16 | 10.1683 | 24.08400 | 122.19100 | 32.0000 | 12     | 7.818 |
| SN25 | 2005 | 249 | 1  | 40      | 10.976   | S         | 0.500   | 0.995  |       |
| CMB  | 2005 | 249 | 1  | 40      | 0.661    | S         | 0.500   | -0.837 |       |
| SN44 | 2005 | 249 | 1  | 40      | 7.741    | S         | 0.500   | 0.335  |       |
| SN57 | 2005 | 249 | 1  | 40      | 7.766    | S         | 0.500   | 1.478  |       |
| R06C | 2005 | 249 | 1  | 40      | 3.974    | S         | 0.500   | 0.392  |       |
| SN84 | 2005 | 249 | 1  | 40      | 1.307    | S         | 0.500   | -1.053 |       |
| SN73 | 2005 | 249 | 1  | 40      | 2.876    | S         | 0.500   | -0.417 |       |
| SN66 | 2005 | 249 | 1  | 40      | 5.584    | S         | 0.500   | 0.242  |       |
| SN45 | 2005 | 249 | 1  | 40      | 8.482    | S         | 0.500   | 0.888  |       |
| S08C | 2005 | 249 | 1  | 40      | 13.017   | S         | 0.500   | 1.647  |       |
| SN47 | 2005 | 249 | 1  | 40      | 9.382    | S         | 0.500   | 1.278  |       |
| SN43 | 2005 | 249 | 1  | 40      | 6.617    | S         | 0.500   | -0.633 |       |
| SN36 | 2005 | 249 | 1  | 40      | 10.648   | S         | 0.500   | 1.697  |       |
| SN48 | 2005 | 249 | 1  | 40      | 9.202    | S         | 0.500   | 1.320  |       |
| SN51 | 2005 | 249 | 1  | 40      | 4.749    | S         | 0.500   | -0.224 |       |
| SN11 | 2005 | 249 | 1  | 40      | 8.036    | S         | 0.500   | -1.133 |       |
| SN67 | 2005 | 249 | 1  | 40      | 6.262    | S         | 0.500   | 0.732  |       |
| SN24 | 2005 | 249 | 1  | 40      | 9.822    | S         | 0.500   | 0.638  |       |
| S05C | 2005 | 249 | 1  | 40      | 3.169    | S         | 0.500   | -0.692 |       |
| SN63 | 2005 | 249 | 1  | 40      | 4.091    | S         | 0.500   | -0.900 |       |
| SN52 | 2005 | 249 | 1  | 40      | 5.007    | S         | 0.500   | -0.511 |       |
| M02C | 2005 | 249 | 1  | 39      | 42.864   | S         | 0.500   | 0.832  |       |
| M06C | 2005 | 249 | 1  | 39      | 50.328   | S         | 0.500   | -0.919 |       |
| ORV  | 2005 | 249 | 1  | 39      | 49.656   | S         | 0.500   | -3.380 |       |
| MPM  | 2005 | 249 | 1  | 40      | 16.893   | S         | 0.500   | -1.096 |       |
| P05C | 2005 | 249 | 1  | 39      | 54.473   | S         | 0.500   | -2.512 |       |
| SN16 | 2005 | 249 | 1  | 40      | 12.107   | S         | 0.500   | 0.634  |       |
| DBO  | 2005 | 249 | 1  | 39      | 34.105   | S         | 0.500   | -1.149 |       |

|      |      |     |   |    |          |       |        |
|------|------|-----|---|----|----------|-------|--------|
| S04C | 2005 | 249 | 1 | 39 | 58.727 S | 0.500 | -1.369 |
| EDW2 | 2005 | 249 | 1 | 40 | 20.746 S | 0.500 | 1.356  |
| TPH  | 2005 | 249 | 1 | 40 | 12.707 S | 0.500 | 0.250  |
| R04C | 2005 | 249 | 1 | 39 | 57.396 S | 0.500 | -1.201 |
| HUMO | 2005 | 249 | 1 | 39 | 37.552 S | 0.500 | -0.305 |
| LAVA | 2005 | 249 | 1 | 39 | 56.558 S | 0.500 | -1.598 |
| SN46 | 2005 | 249 | 1 | 40 | 10.175 S | 0.500 | 1.991  |
| RCT  | 2005 | 249 | 1 | 40 | 8.942 S  | 0.500 | -1.700 |
| SN28 | 2005 | 249 | 1 | 40 | 11.455 S | 0.500 | 1.718  |
| SN15 | 2005 | 249 | 1 | 40 | 11.434 S | 0.500 | 0.880  |
| ELFS | 2005 | 249 | 1 | 39 | 51.526 S | 0.500 | -0.684 |
| SN38 | 2005 | 249 | 1 | 40 | 9.963 S  | 0.500 | 1.250  |
| SN12 | 2005 | 249 | 1 | 40 | 9.195 S  | 0.500 | -0.833 |
| SN26 | 2005 | 249 | 1 | 40 | 11.383 S | 0.500 | 1.778  |
| BMN  | 2005 | 249 | 1 | 40 | 4.318 S  | 0.500 | -0.331 |
| SN42 | 2005 | 249 | 1 | 40 | 6.368 S  | 0.500 | -0.468 |
| SN95 | 2005 | 249 | 1 | 40 | 0.432 S  | 0.500 | -0.864 |
| MLAC | 2005 | 249 | 1 | 40 | 10.680 S | 0.500 | 2.032  |
| KCC  | 2005 | 249 | 1 | 40 | 7.961 S  | 0.500 | 0.445  |

|      |     |    |    |         |          |           |         |    |       |
|------|-----|----|----|---------|----------|-----------|---------|----|-------|
| 2006 | 119 | 16 | 58 | 11.9637 | 60.49100 | 167.51601 | 11.0000 | 17 | 5.644 |
|------|-----|----|----|---------|----------|-----------|---------|----|-------|

|      |      |     |    |    |          |       |        |
|------|------|-----|----|----|----------|-------|--------|
| M03C | 2006 | 119 | 17 | 13 | 17.521 S | 0.500 | -0.570 |
| BBR  | 2006 | 119 | 17 | 15 | 10.674 S | 0.500 | -0.228 |
| RRX  | 2006 | 119 | 17 | 15 | 3.117 S  | 0.500 | -0.039 |
| M08A | 2006 | 119 | 17 | 13 | 41.814 S | 0.500 | -0.568 |
| SLA  | 2006 | 119 | 17 | 14 | 50.592 S | 0.500 | 0.108  |
| Q03C | 2006 | 119 | 17 | 13 | 49.268 S | 0.500 | 1.679  |
| WVOR | 2006 | 119 | 17 | 13 | 30.173 S | 0.500 | 0.409  |
| MWC  | 2006 | 119 | 17 | 15 | 3.485 S  | 0.500 | -0.182 |
| CHF  | 2006 | 119 | 17 | 15 | 2.547 S  | 0.500 | 0.028  |
| BDM  | 2006 | 119 | 17 | 13 | 56.417 S | 0.500 | 0.265  |
| V04C | 2006 | 119 | 17 | 14 | 28.269 S | 0.500 | -0.323 |
| BNLO | 2006 | 119 | 17 | 14 | 1.210 S  | 0.500 | -2.021 |
| K06A | 2006 | 119 | 17 | 13 | 15.114 S | 0.500 | 0.519  |
| N08A | 2006 | 119 | 17 | 13 | 50.720 S | 0.500 | -0.534 |
| LRL  | 2006 | 119 | 17 | 14 | 51.529 S | 0.500 | -0.735 |
| T05C | 2006 | 119 | 17 | 14 | 17.134 S | 0.500 | 0.956  |
| RPV  | 2006 | 119 | 17 | 15 | 5.997 S  | 0.500 | -0.254 |
| DEC  | 2006 | 119 | 17 | 15 | 1.619 S  | 0.500 | 0.538  |
| SUTB | 2006 | 119 | 17 | 13 | 40.825 S | 0.500 | -1.900 |
| GRA  | 2006 | 119 | 17 | 14 | 38.082 S | 0.500 | 0.538  |
| Q07A | 2006 | 119 | 17 | 14 | 6.165 S  | 0.500 | -0.481 |
| FMP  | 2006 | 119 | 17 | 15 | 7.520 S  | 0.500 | 0.472  |
| M07A | 2006 | 119 | 17 | 13 | 37.214 S | 0.500 | -0.261 |
| M02C | 2006 | 119 | 17 | 13 | 12.280 S | 0.500 | 0.844  |
| O09A | 2006 | 119 | 17 | 14 | 3.876 S  | 0.500 | -0.467 |
| HAST | 2006 | 119 | 17 | 14 | 14.272 S | 0.500 | -1.435 |
| CIA  | 2006 | 119 | 17 | 15 | 9.622 S  | 0.500 | -0.346 |
| VCS  | 2006 | 119 | 17 | 15 | 0.185 S  | 0.500 | 0.103  |
| SCZ2 | 2006 | 119 | 17 | 14 | 54.792 S | 0.500 | -0.316 |
| PHL  | 2006 | 119 | 17 | 14 | 33.201 S | 0.500 | -0.094 |
| L09A | 2006 | 119 | 17 | 13 | 41.241 S | 0.500 | 0.234  |
| TOV  | 2006 | 119 | 17 | 14 | 59.385 S | 0.500 | 0.604  |
| RCT  | 2006 | 119 | 17 | 14 | 31.087 S | 0.500 | -1.124 |
| MPM  | 2006 | 119 | 17 | 14 | 47.834 S | 0.500 | 0.526  |
| ORV  | 2006 | 119 | 17 | 13 | 39.674 S | 0.500 | -1.444 |
| M04C | 2006 | 119 | 17 | 13 | 14.486 S | 0.500 | -0.038 |
| O08A | 2006 | 119 | 17 | 13 | 55.731 S | 0.500 | -0.849 |
| MCCM | 2006 | 119 | 17 | 13 | 45.306 S | 0.500 | -1.546 |
| OSI  | 2006 | 119 | 17 | 14 | 54.696 S | 0.500 | 0.028  |
| SHO  | 2006 | 119 | 17 | 14 | 57.073 S | 0.500 | 0.114  |
| SN22 | 2006 | 119 | 17 | 14 | 23.982 S | 0.500 | -0.165 |
| V05C | 2006 | 119 | 17 | 14 | 33.299 S | 0.500 | 0.713  |



|      |      |     |    |    |          |       |        |
|------|------|-----|----|----|----------|-------|--------|
| ELFS | 2006 | 119 | 17 | 13 | 34.752 S | 0.500 | -0.276 |
| SMM  | 2006 | 119 | 17 | 14 | 38.465 S | 0.500 | 0.182  |
| LGU  | 2006 | 119 | 17 | 14 | 57.668 S | 0.500 | -0.180 |
| S04C | 2006 | 119 | 17 | 14 | 5.001 S  | 0.500 | 0.034  |
| PKD  | 2006 | 119 | 17 | 14 | 27.437 S | 0.500 | -0.079 |
| MPP  | 2006 | 119 | 17 | 14 | 44.044 S | 0.500 | -0.403 |
| N09A | 2006 | 119 | 17 | 13 | 54.261 S | 0.500 | -0.397 |
| Q04C | 2006 | 119 | 17 | 13 | 48.721 S | 0.500 | -1.004 |
| HOPS | 2006 | 119 | 17 | 13 | 36.255 S | 0.500 | -0.109 |
| MOD  | 2006 | 119 | 17 | 13 | 24.213 S | 0.500 | 0.094  |
| LAVA | 2006 | 119 | 17 | 13 | 53.905 S | 0.500 | -1.382 |
| TIN  | 2006 | 119 | 17 | 14 | 32.168 S | 0.500 | 0.759  |
| PACP | 2006 | 119 | 17 | 14 | 10.579 S | 0.500 | -0.215 |
| U04C | 2006 | 119 | 17 | 14 | 21.775 S | 0.500 | 0.387  |
| SN73 | 2006 | 119 | 17 | 14 | 9.896 S  | 0.500 | -0.110 |
| MNRC | 2006 | 119 | 17 | 13 | 43.273 S | 0.500 | 1.099  |
| YBH  | 2006 | 119 | 17 | 13 | 9.662 S  | 0.500 | 0.900  |
| P06A | 2006 | 119 | 17 | 13 | 49.907 S | 0.500 | -1.154 |
| Q08A | 2006 | 119 | 17 | 14 | 12.989 S | 0.500 | -0.652 |
| CWC  | 2006 | 119 | 17 | 14 | 40.072 S | 0.500 | 0.822  |
| SN48 | 2006 | 119 | 17 | 14 | 17.652 S | 0.500 | 0.560  |
| T06C | 2006 | 119 | 17 | 14 | 21.096 S | 0.500 | -0.480 |
| SN76 | 2006 | 119 | 17 | 14 | 8.517 S  | 0.500 | -0.036 |
| SN52 | 2006 | 119 | 17 | 14 | 17.175 S | 0.500 | 0.080  |
| S06C | 2006 | 119 | 17 | 14 | 11.154 S | 0.500 | -0.158 |
| N07B | 2006 | 119 | 17 | 13 | 45.037 S | 0.500 | -0.455 |
| R08A | 2006 | 119 | 17 | 14 | 18.006 S | 0.500 | 0.058  |
| SN53 | 2006 | 119 | 17 | 14 | 16.595 S | 0.500 | -0.023 |
| R06C | 2006 | 119 | 17 | 14 | 6.978 S  | 0.500 | -0.062 |
| SN46 | 2006 | 119 | 17 | 14 | 20.052 S | 0.500 | 0.875  |
| SN21 | 2006 | 119 | 17 | 14 | 24.237 S | 0.500 | -0.738 |
| WCN  | 2006 | 119 | 17 | 13 | 55.358 S | 0.500 | -1.018 |
| SN55 | 2006 | 119 | 17 | 14 | 15.607 S | 0.500 | 0.450  |
| SN23 | 2006 | 119 | 17 | 14 | 24.133 S | 0.500 | -0.017 |
| KCC  | 2006 | 119 | 17 | 14 | 21.368 S | 0.500 | 0.477  |
| O07A | 2006 | 119 | 17 | 13 | 51.892 S | 0.500 | -1.042 |
| R04C | 2006 | 119 | 17 | 13 | 58.590 S | 0.500 | -0.577 |
| J06A | 2006 | 119 | 17 | 13 | 10.640 S | 0.500 | 0.152  |
| SN62 | 2006 | 119 | 17 | 14 | 13.370 S | 0.500 | 0.032  |
| SN38 | 2006 | 119 | 17 | 14 | 20.394 S | 0.500 | 0.620  |
| SN71 | 2006 | 119 | 17 | 14 | 9.441 S  | 0.500 | -0.243 |
| R07C | 2006 | 119 | 17 | 14 | 15.255 S | 0.500 | 0.565  |
| O04C | 2006 | 119 | 17 | 13 | 35.485 S | 0.500 | -0.413 |
| SN51 | 2006 | 119 | 17 | 14 | 16.200 S | 0.500 | -0.156 |
| M06C | 2006 | 119 | 17 | 13 | 30.122 S | 0.500 | -0.363 |
| O06A | 2006 | 119 | 17 | 13 | 45.409 S | 0.500 | -0.987 |
| SN66 | 2006 | 119 | 17 | 14 | 11.545 S | 0.500 | -0.275 |
| O05C | 2006 | 119 | 17 | 13 | 39.790 S | 0.500 | -1.082 |
| SN28 | 2006 | 119 | 17 | 14 | 23.121 S | 0.500 | 0.558  |
| SN26 | 2006 | 119 | 17 | 14 | 24.892 S | 0.500 | 1.018  |
| SN54 | 2006 | 119 | 17 | 14 | 15.510 S | 0.500 | 0.116  |
| M05C | 2006 | 119 | 17 | 13 | 23.973 S | 0.500 | -0.131 |
| S05C | 2006 | 119 | 17 | 14 | 13.015 S | 0.500 | -0.521 |
| S08C | 2006 | 119 | 17 | 14 | 28.083 S | 0.500 | 0.778  |
| SN36 | 2006 | 119 | 17 | 14 | 22.737 S | 0.500 | 0.971  |
| SN67 | 2006 | 119 | 17 | 14 | 13.137 S | 0.500 | 1.201  |
| SN47 | 2006 | 119 | 17 | 14 | 20.018 S | 0.500 | 1.955  |
| SN44 | 2006 | 119 | 17 | 14 | 19.494 S | 0.500 | 0.052  |
| MLAC | 2006 | 119 | 17 | 14 | 22.732 S | 0.500 | 1.596  |
| SN15 | 2006 | 119 | 17 | 14 | 27.658 S | 0.500 | 1.064  |
| SN16 | 2006 | 119 | 17 | 14 | 29.248 S | 0.500 | 1.126  |
| SN37 | 2006 | 119 | 17 | 14 | 22.058 S | 0.500 | 1.005  |
| S09A | 2006 | 119 | 17 | 14 | 30.614 S | 0.500 | -0.376 |

|      |      |     |    |    |        |   |       |        |
|------|------|-----|----|----|--------|---|-------|--------|
| BEK  | 2006 | 119 | 17 | 13 | 44.855 | S | 0.500 | -1.212 |
| SN14 | 2006 | 119 | 17 | 14 | 27.794 | S | 0.500 | 0.716  |
| SN27 | 2006 | 119 | 17 | 14 | 26.298 | S | 0.500 | 2.356  |
| SN25 | 2006 | 119 | 17 | 14 | 26.003 | S | 0.500 | 0.908  |

|      |      |     |    |         |           |           |         |        |       |
|------|------|-----|----|---------|-----------|-----------|---------|--------|-------|
| 2006 | 120  | 19  | 17 | 22.0886 | -27.01700 | -71.02200 | 12.0000 | 18     | 7.109 |
| LAVA | 2006 | 120 | 19 | 39      | 38.128    | S         | 0.500   | -0.197 |       |
| U05C | 2006 | 120 | 19 | 39      | 15.174    | S         | 0.500   | -0.868 |       |
| YBH  | 2006 | 120 | 19 | 40      | 6.734     | S         | 0.500   | -3.651 |       |
| FMP  | 2006 | 120 | 19 | 38      | 45.415    | S         | 0.500   | 1.191  |       |
| RPV  | 2006 | 120 | 19 | 38      | 46.204    | S         | 0.500   | 1.204  |       |
| HUMO | 2006 | 120 | 19 | 40      | 14.826    | S         | 0.500   | -0.469 |       |
| L02A | 2006 | 120 | 19 | 40      | 17.696    | S         | 0.500   | 2.250  |       |
| SN25 | 2006 | 120 | 19 | 39      | 16.212    | S         | 0.500   | -0.038 |       |
| SLA  | 2006 | 120 | 19 | 38      | 57.177    | S         | 0.500   | 1.329  |       |
| LRL  | 2006 | 120 | 19 | 38      | 56.215    | S         | 0.500   | 1.317  |       |
| N09A | 2006 | 120 | 19 | 39      | 36.135    | S         | 0.500   | -0.885 |       |
| CIA  | 2006 | 120 | 19 | 38      | 43.039    | S         | 0.500   | 0.709  |       |
| DBO  | 2006 | 120 | 19 | 40      | 21.323    | S         | 0.500   | 2.836  |       |
| DEC  | 2006 | 120 | 19 | 38      | 48.918    | S         | 0.500   | 0.175  |       |
| GSC  | 2006 | 120 | 19 | 38      | 49.701    | S         | 0.500   | 1.412  |       |
| P07A | 2006 | 120 | 19 | 39      | 34.135    | S         | 0.500   | 0.179  |       |
| SCZ2 | 2006 | 120 | 19 | 38      | 54.406    | S         | 0.500   | -0.339 |       |
| O09A | 2006 | 120 | 19 | 39      | 28.664    | S         | 0.500   | -1.273 |       |
| SN22 | 2006 | 120 | 19 | 39      | 14.439    | S         | 0.500   | -2.613 |       |
| P01C | 2006 | 120 | 19 | 39      | 58.074    | S         | 0.500   | -0.210 |       |
| BFS  | 2006 | 120 | 19 | 38      | 45.604    | S         | 0.500   | 0.829  |       |
| M05C | 2006 | 120 | 19 | 39      | 58.661    | S         | 0.500   | -1.239 |       |
| HATC | 2006 | 120 | 19 | 39      | 55.583    | S         | 0.500   | -2.103 |       |
| V05C | 2006 | 120 | 19 | 39      | 11.166    | S         | 0.500   | -0.147 |       |
| RCT  | 2006 | 120 | 19 | 39      | 8.350     | S         | 0.500   | -2.343 |       |
| SHO  | 2006 | 120 | 19 | 38      | 50.862    | S         | 0.500   | 1.106  |       |
| M02C | 2006 | 120 | 19 | 40      | 5.244     | S         | 0.500   | -3.883 |       |
| M09A | 2006 | 120 | 19 | 39      | 39.957    | S         | 0.500   | -1.097 |       |
| VCS  | 2006 | 120 | 19 | 38      | 49.417    | S         | 0.500   | -0.143 |       |
| M08A | 2006 | 120 | 19 | 39      | 45.371    | S         | 0.500   | -0.618 |       |
| P05C | 2006 | 120 | 19 | 39      | 41.589    | S         | 0.500   | -0.203 |       |
| BBR  | 2006 | 120 | 19 | 38      | 41.948    | S         | 0.500   | 1.485  |       |
| SN15 | 2006 | 120 | 19 | 39      | 14.764    | S         | 0.500   | -0.405 |       |
| ELFS | 2006 | 120 | 19 | 39      | 51.287    | S         | 0.500   | -1.184 |       |
| SN11 | 2006 | 120 | 19 | 39      | 11.160    | S         | 0.500   | -2.791 |       |
| Q03C | 2006 | 120 | 19 | 39      | 46.167    | S         | 0.500   | 1.595  |       |
| V03C | 2006 | 120 | 19 | 39      | 20.965    | S         | 0.500   | 0.575  |       |
| RRX  | 2006 | 120 | 19 | 38      | 46.452    | S         | 0.500   | 0.599  |       |
| SN23 | 2006 | 120 | 19 | 39      | 15.431    | S         | 0.500   | -1.876 |       |
| SUTB | 2006 | 120 | 19 | 39      | 47.041    | S         | 0.500   | -0.556 |       |
| SVD  | 2006 | 120 | 19 | 38      | 41.784    | S         | 0.500   | 1.852  |       |
| SN36 | 2006 | 120 | 19 | 39      | 18.450    | S         | 0.500   | -0.155 |       |
| JCS  | 2006 | 120 | 19 | 38      | 29.891    | S         | 0.500   | 1.430  |       |
| J06A | 2006 | 120 | 19 | 40      | 8.691     | S         | 0.500   | 0.171  |       |
| CHF  | 2006 | 120 | 19 | 38      | 48.179    | S         | 0.500   | 0.525  |       |
| MOD  | 2006 | 120 | 19 | 39      | 59.395    | S         | 0.500   | -0.125 |       |
| O08A | 2006 | 120 | 19 | 39      | 34.616    | S         | 0.500   | -1.576 |       |
| GRA  | 2006 | 120 | 19 | 39      | 6.186     | S         | 0.500   | 0.885  |       |
| N02C | 2006 | 120 | 19 | 40      | 4.875     | S         | 0.500   | -2.924 |       |
| MWC  | 2006 | 120 | 19 | 38      | 47.531    | S         | 0.500   | 0.481  |       |
| M06C | 2006 | 120 | 19 | 39      | 54.641    | S         | 0.500   | -0.539 |       |
| R08A | 2006 | 120 | 19 | 39      | 20.700    | S         | 0.500   | 0.133  |       |
| MNRC | 2006 | 120 | 19 | 39      | 49.953    | S         | 0.500   | 1.227  |       |
| SN21 | 2006 | 120 | 19 | 39      | 13.036    | S         | 0.500   | -3.042 |       |
| LGU  | 2006 | 120 | 19 | 38      | 52.516    | S         | 0.500   | 0.431  |       |
| FARB | 2006 | 120 | 19 | 39      | 42.717    | S         | 0.500   | -0.720 |       |
| FUR  | 2006 | 120 | 19 | 38      | 59.119    | S         | 0.500   | 1.295  |       |

|      |      |     |    |    |        |   |       |        |
|------|------|-----|----|----|--------|---|-------|--------|
| SN44 | 2006 | 120 | 19 | 39 | 20.116 | S | 0.500 | -0.558 |
| O02C | 2006 | 120 | 19 | 39 | 57.820 | S | 0.500 | -2.378 |
| BEK  | 2006 | 120 | 19 | 39 | 44.593 | S | 0.500 | -0.076 |
| MPP  | 2006 | 120 | 19 | 39 | 2.935  | S | 0.500 | -0.289 |
| SN16 | 2006 | 120 | 19 | 39 | 13.621 | S | 0.500 | 0.151  |
| MPM  | 2006 | 120 | 19 | 39 | 0.050  | S | 0.500 | 1.336  |
| DGR  | 2006 | 120 | 19 | 38 | 37.584 | S | 0.500 | 1.794  |
| SN14 | 2006 | 120 | 19 | 39 | 14.419 | S | 0.500 | -0.856 |
| O01C | 2006 | 120 | 19 | 40 | 4.586  | S | 0.500 | -1.141 |
| N08A | 2006 | 120 | 19 | 39 | 38.800 | S | 0.500 | -0.986 |
| T06C | 2006 | 120 | 19 | 39 | 15.838 | S | 0.500 | -2.951 |
| ORV  | 2006 | 120 | 19 | 39 | 47.816 | S | 0.500 | -0.402 |
| SN47 | 2006 | 120 | 19 | 39 | 23.064 | S | 0.500 | 1.968  |
| SMM  | 2006 | 120 | 19 | 39 | 7.745  | S | 0.500 | 0.263  |
| PHL  | 2006 | 120 | 19 | 39 | 11.615 | S | 0.500 | -0.061 |
| PLM  | 2006 | 120 | 19 | 38 | 34.050 | S | 0.500 | 1.478  |
| O07A | 2006 | 120 | 19 | 39 | 38.102 | S | 0.500 | -0.706 |
| CVS  | 2006 | 120 | 19 | 39 | 44.825 | S | 0.500 | -0.131 |
| M07A | 2006 | 120 | 19 | 39 | 49.602 | S | 0.500 | -0.229 |
| SN48 | 2006 | 120 | 19 | 39 | 22.800 | S | 0.500 | 1.189  |
| MUR  | 2006 | 120 | 19 | 38 | 38.019 | S | 0.500 | 1.554  |
| SN37 | 2006 | 120 | 19 | 39 | 19.335 | S | 0.500 | 0.561  |
| L09A | 2006 | 120 | 19 | 39 | 46.037 | S | 0.500 | -0.888 |
| Q08A | 2006 | 120 | 19 | 39 | 23.059 | S | 0.500 | -0.337 |
| S09A | 2006 | 120 | 19 | 39 | 11.054 | S | 0.500 | 0.645  |
| PKD  | 2006 | 120 | 19 | 39 | 15.458 | S | 0.500 | -0.317 |
| ISA  | 2006 | 120 | 19 | 39 | 2.363  | S | 0.500 | 1.183  |
| SN52 | 2006 | 120 | 19 | 39 | 20.217 | S | 0.500 | -1.891 |
| WVOR | 2006 | 120 | 19 | 39 | 54.825 | S | 0.500 | -0.196 |
| SN38 | 2006 | 120 | 19 | 39 | 20.361 | S | 0.500 | 0.859  |
| OSI  | 2006 | 120 | 19 | 38 | 54.329 | S | 0.500 | 0.173  |
| N07B | 2006 | 120 | 19 | 39 | 43.482 | S | 0.500 | -0.590 |
| R04C | 2006 | 120 | 19 | 39 | 35.318 | S | 0.500 | -0.084 |
| SN27 | 2006 | 120 | 19 | 39 | 17.990 | S | 0.500 | 1.468  |
| SN54 | 2006 | 120 | 19 | 39 | 23.693 | S | 0.500 | -0.017 |
| O05C | 2006 | 120 | 19 | 39 | 47.302 | S | 0.500 | -1.009 |
| HEC  | 2006 | 120 | 19 | 38 | 42.561 | S | 0.500 | 1.039  |
| P09A | 2006 | 120 | 19 | 39 | 23.595 | S | 0.500 | -1.260 |
| O04C | 2006 | 120 | 19 | 39 | 50.590 | S | 0.500 | -1.413 |
| R07C | 2006 | 120 | 19 | 39 | 25.114 | S | 0.500 | 1.360  |
| WCN  | 2006 | 120 | 19 | 39 | 37.964 | S | 0.500 | 0.690  |
| SAO  | 2006 | 120 | 19 | 39 | 27.271 | S | 0.500 | -0.068 |
| S08C | 2006 | 120 | 19 | 39 | 14.883 | S | 0.500 | 0.447  |
| I03A | 2006 | 120 | 19 | 40 | 26.792 | S | 0.500 | 4.432  |
| S06C | 2006 | 120 | 19 | 39 | 26.196 | S | 0.500 | -0.526 |
| BDM  | 2006 | 120 | 19 | 39 | 39.266 | S | 0.500 | 0.576  |
| O06A | 2006 | 120 | 19 | 39 | 43.878 | S | 0.500 | -0.169 |
| SN46 | 2006 | 120 | 19 | 39 | 21.790 | S | 0.500 | 0.955  |
| SN51 | 2006 | 120 | 19 | 39 | 21.080 | S | 0.500 | -1.852 |
| S05C | 2006 | 120 | 19 | 39 | 23.824 | S | 0.500 | -1.212 |
| HAST | 2006 | 120 | 19 | 39 | 25.204 | S | 0.500 | 0.027  |
| SN67 | 2006 | 120 | 19 | 39 | 28.400 | S | 0.500 | 2.295  |
| S04C | 2006 | 120 | 19 | 39 | 32.681 | S | 0.500 | 0.664  |
| SN66 | 2006 | 120 | 19 | 39 | 27.336 | S | 0.500 | 0.973  |
| PACP | 2006 | 120 | 19 | 39 | 28.481 | S | 0.500 | 0.200  |
| U04C | 2006 | 120 | 19 | 39 | 20.170 | S | 0.500 | -0.052 |
| SN62 | 2006 | 120 | 19 | 39 | 23.967 | S | 0.500 | -1.184 |
| SN73 | 2006 | 120 | 19 | 39 | 26.996 | S | 0.500 | -0.759 |
| SN76 | 2006 | 120 | 19 | 39 | 30.221 | S | 0.500 | 1.495  |
| SN71 | 2006 | 120 | 19 | 39 | 26.879 | S | 0.500 | -0.928 |
| R06C | 2006 | 120 | 19 | 39 | 31.069 | S | 0.500 | 1.546  |

2006 123 15 26 45.4406 -20.18700 -174.12300 55.0000

|      |      |     |    |    |        |   |       |        |
|------|------|-----|----|----|--------|---|-------|--------|
| S06C | 2006 | 123 | 15 | 48 | 17.579 | S | 0.500 | -0.379 |
| RSS  | 2006 | 123 | 15 | 48 | 8.172  | S | 0.500 | -1.531 |
| BAK  | 2006 | 123 | 15 | 48 | 6.024  | S | 0.500 | 0.402  |
| SMM  | 2006 | 123 | 15 | 48 | 0.308  | S | 0.500 | 0.902  |
| BDM  | 2006 | 123 | 15 | 48 | 5.815  | S | 0.500 | 1.463  |
| MCCM | 2006 | 123 | 15 | 47 | 58.993 | S | 0.500 | 0.027  |
| BMN  | 2006 | 123 | 15 | 48 | 49.846 | S | 0.500 | -1.707 |
| K06A | 2006 | 123 | 15 | 48 | 48.057 | S | 0.500 | 0.075  |
| N02C | 2006 | 123 | 15 | 48 | 16.342 | S | 0.500 | 0.624  |
| N10A | 2006 | 123 | 15 | 48 | 57.697 | S | 0.500 | -0.190 |
| P06A | 2006 | 123 | 15 | 48 | 28.679 | S | 0.500 | -0.850 |
| O07A | 2006 | 123 | 15 | 48 | 38.501 | S | 0.500 | -0.815 |
| I03A | 2006 | 123 | 15 | 48 | 37.600 | S | 0.500 | -0.707 |
| V05C | 2006 | 123 | 15 | 48 | 5.081  | S | 0.500 | 1.531  |
| PKD  | 2006 | 123 | 15 | 48 | 1.062  | S | 0.500 | 1.530  |
| N09A | 2006 | 123 | 15 | 48 | 52.542 | S | 0.500 | 0.350  |
| I06A | 2006 | 123 | 15 | 48 | 55.429 | S | 0.500 | -0.329 |
| U04C | 2006 | 123 | 15 | 48 | 2.781  | S | 0.500 | 1.933  |
| USC  | 2006 | 123 | 15 | 48 | 3.006  | S | 0.500 | 0.255  |
| TOV  | 2006 | 123 | 15 | 47 | 59.771 | S | 0.500 | -0.059 |
| SDP  | 2006 | 123 | 15 | 47 | 51.053 | S | 0.500 | 0.404  |
| PAS  | 2006 | 123 | 15 | 48 | 5.245  | S | 0.500 | 0.699  |
| BEK  | 2006 | 123 | 15 | 48 | 27.106 | S | 0.500 | -0.839 |
| P07A | 2006 | 123 | 15 | 48 | 34.540 | S | 0.500 | -0.611 |
| ARV  | 2006 | 123 | 15 | 48 | 6.470  | S | 0.500 | 0.345  |
| DJJ  | 2006 | 123 | 15 | 48 | 2.150  | S | 0.500 | -0.052 |
| J02A | 2006 | 123 | 15 | 48 | 32.120 | S | 0.500 | -0.071 |
| PACP | 2006 | 123 | 15 | 48 | 3.432  | S | 0.500 | 1.399  |
| MNRC | 2006 | 123 | 15 | 48 | 8.813  | S | 0.500 | 1.472  |
| WCN  | 2006 | 123 | 15 | 48 | 27.850 | S | 0.500 | -0.084 |
| O09A | 2006 | 123 | 15 | 48 | 50.095 | S | 0.500 | 0.071  |
| LGU  | 2006 | 123 | 15 | 47 | 58.115 | S | 0.500 | 0.209  |
| CHF  | 2006 | 123 | 15 | 48 | 7.215  | S | 0.500 | 0.075  |
| HUMO | 2006 | 123 | 15 | 48 | 30.083 | S | 0.500 | -0.500 |
| CIA  | 2006 | 123 | 15 | 47 | 58.035 | S | 0.500 | -0.134 |
| HOPS | 2006 | 123 | 15 | 48 | 5.435  | S | 0.500 | 1.499  |
| N08A | 2006 | 123 | 15 | 48 | 47.869 | S | 0.500 | -0.013 |
| M02C | 2006 | 123 | 15 | 48 | 22.188 | S | 0.500 | -0.403 |
| J06A | 2006 | 123 | 15 | 48 | 51.307 | S | 0.500 | -0.379 |
| MOD  | 2006 | 123 | 15 | 48 | 41.828 | S | 0.500 | -0.002 |
| PHL  | 2006 | 123 | 15 | 47 | 57.318 | S | 0.500 | 1.375  |
| Q09A | 2006 | 123 | 15 | 48 | 41.257 | S | 0.500 | -0.480 |
| HATC | 2006 | 123 | 15 | 48 | 25.813 | S | 0.500 | -1.552 |
| DEC  | 2006 | 123 | 15 | 48 | 4.154  | S | 0.500 | 0.064  |
| P09A | 2006 | 123 | 15 | 48 | 45.719 | S | 0.500 | -0.805 |
| CVS  | 2006 | 123 | 15 | 48 | 3.448  | S | 0.500 | -0.049 |
| P05C | 2006 | 123 | 15 | 48 | 21.571 | S | 0.500 | -0.769 |
| FARB | 2006 | 123 | 15 | 47 | 55.258 | S | 0.500 | 0.328  |
| M09A | 2006 | 123 | 15 | 48 | 56.268 | S | 0.500 | -0.078 |
| HAST | 2006 | 123 | 15 | 47 | 56.622 | S | 0.500 | 1.025  |
| R07C | 2006 | 123 | 15 | 48 | 25.819 | S | 0.500 | 1.047  |
| O05C | 2006 | 123 | 15 | 48 | 23.316 | S | 0.500 | -1.278 |
| BNLO | 2006 | 123 | 15 | 47 | 57.013 | S | 0.500 | 0.295  |
| N07B | 2006 | 123 | 15 | 48 | 41.865 | S | 0.500 | -0.682 |
| V03C | 2006 | 123 | 15 | 47 | 56.368 | S | 0.500 | 1.226  |
| SCZ2 | 2006 | 123 | 15 | 47 | 52.958 | S | 0.500 | 0.171  |
| O04C | 2006 | 123 | 15 | 48 | 24.519 | S | 0.500 | -1.625 |
| S04C | 2006 | 123 | 15 | 48 | 5.937  | S | 0.500 | 0.911  |
| WVOR | 2006 | 123 | 15 | 48 | 55.584 | S | 0.500 | 0.320  |
| FMP  | 2006 | 123 | 15 | 48 | 0.830  | S | 0.500 | -0.021 |
| Q08A | 2006 | 123 | 15 | 48 | 36.496 | S | 0.500 | -0.547 |
| VCS  | 2006 | 123 | 15 | 48 | 7.134  | S | 0.500 | -0.091 |
| R08A | 2006 | 123 | 15 | 48 | 32.932 | S | 0.500 | 0.355  |

|      |      |     |    |    |        |   |       |        |
|------|------|-----|----|----|--------|---|-------|--------|
| P01C | 2006 | 123 | 15 | 48 | 5.741  | S | 0.500 | 0.007  |
| O06A | 2006 | 123 | 15 | 48 | 31.898 | S | 0.500 | -1.415 |
| YBH  | 2006 | 123 | 15 | 48 | 25.875 | S | 0.500 | -0.023 |
| PLM  | 2006 | 123 | 15 | 48 | 9.717  | S | 0.500 | 0.235  |
| GRA  | 2006 | 123 | 15 | 48 | 28.260 | S | 0.500 | -0.569 |
| M05C | 2006 | 123 | 15 | 48 | 31.756 | S | 0.500 | -1.266 |
| O03C | 2006 | 123 | 15 | 48 | 15.821 | S | 0.500 | -1.730 |
| HEC  | 2006 | 123 | 15 | 48 | 21.315 | S | 0.500 | -1.035 |
| ELFS | 2006 | 123 | 15 | 48 | 29.308 | S | 0.500 | -1.212 |
| SVD  | 2006 | 123 | 15 | 48 | 12.247 | S | 0.500 | -0.200 |
| L09A | 2006 | 123 | 15 | 48 | 58.652 | S | 0.500 | 0.029  |
| FUR  | 2006 | 123 | 15 | 48 | 28.362 | S | 0.500 | -0.224 |
| SN67 | 2006 | 123 | 15 | 48 | 26.984 | S | 0.500 | 1.541  |
| L02A | 2006 | 123 | 15 | 48 | 24.448 | S | 0.500 | 0.923  |
| M04C | 2006 | 123 | 15 | 48 | 30.624 | S | 0.500 | -0.912 |
| V04C | 2006 | 123 | 15 | 47 | 56.124 | S | 0.500 | 0.885  |
| O08A | 2006 | 123 | 15 | 48 | 44.424 | S | 0.500 | -0.343 |
| SHO  | 2006 | 123 | 15 | 48 | 29.098 | S | 0.500 | -0.464 |
| Q07A | 2006 | 123 | 15 | 48 | 31.011 | S | 0.500 | -0.570 |
| LAVA | 2006 | 123 | 15 | 48 | 17.907 | S | 0.500 | 0.388  |
| EDW2 | 2006 | 123 | 15 | 48 | 10.677 | S | 0.500 | -0.036 |
| SLA  | 2006 | 123 | 15 | 48 | 22.756 | S | 0.500 | 0.188  |
| MUR  | 2006 | 123 | 15 | 48 | 8.784  | S | 0.500 | 0.363  |
| R06C | 2006 | 123 | 15 | 48 | 25.230 | S | 0.500 | 0.452  |
| VTV  | 2006 | 123 | 15 | 48 | 12.583 | S | 0.500 | -0.883 |
| OSI  | 2006 | 123 | 15 | 48 | 4.075  | S | 0.500 | 0.163  |
| SN25 | 2006 | 123 | 15 | 48 | 22.642 | S | 0.500 | 0.178  |
| TIN  | 2006 | 123 | 15 | 48 | 23.170 | S | 0.500 | -0.216 |
| O01C | 2006 | 123 | 15 | 48 | 7.959  | S | 0.500 | 0.467  |
| SN48 | 2006 | 123 | 15 | 48 | 29.703 | S | 0.500 | 1.135  |
| BFS  | 2006 | 123 | 15 | 48 | 8.967  | S | 0.500 | -0.144 |
| S09A | 2006 | 123 | 15 | 48 | 34.173 | S | 0.500 | -0.419 |
| SN37 | 2006 | 123 | 15 | 48 | 27.026 | S | 0.500 | 0.633  |
| LRL  | 2006 | 123 | 15 | 48 | 17.442 | S | 0.500 | 0.540  |
| CWC  | 2006 | 123 | 15 | 48 | 20.393 | S | 0.500 | -0.281 |
| MLAC | 2006 | 123 | 15 | 48 | 24.392 | S | 0.500 | 1.258  |
| BBR  | 2006 | 123 | 15 | 48 | 14.537 | S | 0.500 | -0.484 |
| Q04C | 2006 | 123 | 15 | 48 | 13.538 | S | 0.500 | -0.164 |
| ORV  | 2006 | 123 | 15 | 48 | 17.986 | S | 0.500 | -0.073 |
| SUTB | 2006 | 123 | 15 | 48 | 12.777 | S | 0.500 | -1.284 |
| M03C | 2006 | 123 | 15 | 48 | 24.602 | S | 0.500 | -1.854 |
| SN85 | 2006 | 123 | 15 | 48 | 19.560 | S | 0.500 | -0.425 |
| SN47 | 2006 | 123 | 15 | 48 | 28.419 | S | 0.500 | 2.209  |
| SN46 | 2006 | 123 | 15 | 48 | 25.114 | S | 0.500 | 1.087  |
| S08C | 2006 | 123 | 15 | 48 | 27.325 | S | 0.500 | 0.359  |
| SN38 | 2006 | 123 | 15 | 48 | 30.054 | S | 0.500 | 0.961  |
| SN36 | 2006 | 123 | 15 | 48 | 25.267 | S | 0.500 | 0.407  |
| SN76 | 2006 | 123 | 15 | 48 | 23.938 | S | 0.500 | 0.328  |
| SN22 | 2006 | 123 | 15 | 48 | 14.010 | S | 0.500 | -1.371 |
| GSC  | 2006 | 123 | 15 | 48 | 21.978 | S | 0.500 | -0.029 |
| SN26 | 2006 | 123 | 15 | 48 | 25.309 | S | 0.500 | 0.299  |
| VES  | 2006 | 123 | 15 | 48 | 8.085  | S | 0.500 | -0.865 |
| ISA  | 2006 | 123 | 15 | 48 | 13.044 | S | 0.500 | 0.624  |
| RRX  | 2006 | 123 | 15 | 48 | 17.047 | S | 0.500 | -0.818 |
| SN15 | 2006 | 123 | 15 | 48 | 22.571 | S | 0.500 | 0.106  |
| SN28 | 2006 | 123 | 15 | 48 | 30.103 | S | 0.500 | 0.700  |
| DGR  | 2006 | 123 | 15 | 48 | 10.179 | S | 0.500 | 0.167  |
| O02C | 2006 | 123 | 15 | 48 | 14.953 | S | 0.500 | 0.457  |
| T06C | 2006 | 123 | 15 | 48 | 12.307 | S | 0.500 | -0.412 |
| RCT  | 2006 | 123 | 15 | 48 | 9.783  | S | 0.500 | -1.319 |
| CMB  | 2006 | 123 | 15 | 48 | 15.586 | S | 0.500 | 0.590  |
| SN66 | 2006 | 123 | 15 | 48 | 23.916 | S | 0.500 | 0.374  |
| R04C | 2006 | 123 | 15 | 48 | 12.478 | S | 0.500 | -0.203 |

|      |      |     |    |    |        |   |       |        |
|------|------|-----|----|----|--------|---|-------|--------|
| SN73 | 2006 | 123 | 15 | 48 | 15.326 | S | 0.500 | -0.233 |
| SN71 | 2006 | 123 | 15 | 48 | 12.132 | S | 0.500 | 0.159  |
| KCC  | 2006 | 123 | 15 | 48 | 17.341 | S | 0.500 | -0.333 |
| SN44 | 2006 | 123 | 15 | 48 | 19.440 | S | 0.500 | 0.293  |
| SN55 | 2006 | 123 | 15 | 48 | 22.217 | S | 0.500 | 0.500  |
| SN14 | 2006 | 123 | 15 | 48 | 19.967 | S | 0.500 | -0.601 |
| SN54 | 2006 | 123 | 15 | 48 | 19.397 | S | 0.500 | 0.114  |
| S05C | 2006 | 123 | 15 | 48 | 10.453 | S | 0.500 | -0.276 |
| SN51 | 2006 | 123 | 15 | 48 | 11.803 | S | 0.500 | 0.022  |
| SN16 | 2006 | 123 | 15 | 48 | 25.431 | S | 0.500 | 0.081  |
| HELL | 2006 | 123 | 15 | 48 | 13.815 | S | 0.500 | -1.645 |
| SN21 | 2006 | 123 | 15 | 48 | 11.836 | S | 0.500 | -0.894 |
| MPM  | 2006 | 123 | 15 | 48 | 22.687 | S | 0.500 | 0.551  |
| SN53 | 2006 | 123 | 15 | 48 | 16.412 | S | 0.500 | -0.179 |
| SN62 | 2006 | 123 | 15 | 48 | 14.645 | S | 0.500 | -0.088 |
| SN23 | 2006 | 123 | 15 | 48 | 16.512 | S | 0.500 | -0.862 |
| SN27 | 2006 | 123 | 15 | 48 | 28.504 | S | 0.500 | 1.834  |

|      |     |    |    |         |          |           |         |    |       |
|------|-----|----|----|---------|----------|-----------|---------|----|-------|
| 2006 | 173 | 10 | 53 | 19.0846 | 45.41700 | 149.34300 | 95.0000 | 22 | 7.515 |
|------|-----|----|----|---------|----------|-----------|---------|----|-------|

|      |      |     |    |    |        |   |       |        |
|------|------|-----|----|----|--------|---|-------|--------|
| SN38 | 2006 | 173 | 11 | 12 | 32.042 | S | 0.500 | 0.866  |
| HUMO | 2006 | 173 | 11 | 11 | 23.452 | S | 0.500 | 2.427  |
| CMB  | 2006 | 173 | 11 | 12 | 16.162 | S | 0.500 | 0.552  |
| SN84 | 2006 | 173 | 11 | 12 | 16.541 | S | 0.500 | -0.360 |
| J07A | 2006 | 173 | 11 | 11 | 44.371 | S | 0.500 | 1.413  |
| SN34 | 2006 | 173 | 11 | 12 | 30.878 | S | 0.500 | -0.275 |
| L07A | 2006 | 173 | 11 | 11 | 54.501 | S | 0.500 | 1.207  |
| SN53 | 2006 | 173 | 11 | 12 | 24.926 | S | 0.500 | -0.544 |
| S09A | 2006 | 173 | 11 | 12 | 41.857 | S | 0.500 | -0.182 |
| SN52 | 2006 | 173 | 11 | 12 | 24.947 | S | 0.500 | -0.250 |
| SN37 | 2006 | 173 | 11 | 12 | 32.232 | S | 0.500 | 0.621  |
| J06A | 2006 | 173 | 11 | 11 | 38.885 | S | 0.500 | 1.129  |
| J02A | 2006 | 173 | 11 | 11 | 12.893 | S | 0.500 | 2.209  |
| SN65 | 2006 | 173 | 11 | 12 | 22.742 | S | 0.500 | -0.393 |
| S06C | 2006 | 173 | 11 | 12 | 20.814 | S | 0.500 | -0.317 |
| S08C | 2006 | 173 | 11 | 12 | 37.680 | S | 0.500 | 0.619  |
| SN51 | 2006 | 173 | 11 | 12 | 23.801 | S | 0.500 | -0.228 |
| K06A | 2006 | 173 | 11 | 11 | 42.190 | S | 0.500 | 1.844  |
| LAVA | 2006 | 173 | 11 | 12 | 6.971  | S | 0.500 | -0.523 |
| I06A | 2006 | 173 | 11 | 11 | 33.466 | S | 0.500 | 1.604  |
| SN47 | 2006 | 173 | 11 | 12 | 29.848 | S | 0.500 | 0.826  |
| SN54 | 2006 | 173 | 11 | 12 | 24.777 | S | 0.500 | -0.296 |
| O08A | 2006 | 173 | 11 | 12 | 15.494 | S | 0.500 | 0.291  |
| O04C | 2006 | 173 | 11 | 11 | 53.220 | S | 0.500 | 0.224  |
| SN43 | 2006 | 173 | 11 | 12 | 27.291 | S | 0.500 | -0.540 |
| SN63 | 2006 | 173 | 11 | 12 | 22.363 | S | 0.500 | -0.547 |
| L08A | 2006 | 173 | 11 | 12 | 0.152  | S | 0.500 | 1.123  |
| SN64 | 2006 | 173 | 11 | 12 | 22.814 | S | 0.500 | -0.316 |
| WVOR | 2006 | 173 | 11 | 11 | 56.293 | S | 0.500 | 1.318  |
| SN44 | 2006 | 173 | 11 | 12 | 28.457 | S | 0.500 | -0.024 |
| T06C | 2006 | 173 | 11 | 12 | 28.048 | S | 0.500 | -0.628 |
| K07A | 2006 | 173 | 11 | 11 | 50.243 | S | 0.500 | 1.610  |
| V03C | 2006 | 173 | 11 | 12 | 24.402 | S | 0.500 | -0.110 |
| JCS  | 2006 | 173 | 11 | 13 | 21.542 | S | 0.500 | -1.102 |
| SLA  | 2006 | 173 | 11 | 12 | 53.668 | S | 0.500 | -2.057 |
| SN25 | 2006 | 173 | 11 | 12 | 34.401 | S | 0.500 | 0.314  |
| PHL  | 2006 | 173 | 11 | 12 | 34.202 | S | 0.500 | -0.312 |
| M10A | 2006 | 173 | 11 | 12 | 18.236 | S | 0.500 | 0.934  |
| RRX  | 2006 | 173 | 11 | 13 | 4.447  | S | 0.500 | -0.982 |
| GRA  | 2006 | 173 | 11 | 12 | 46.091 | S | 0.500 | -0.148 |
| U04C | 2006 | 173 | 11 | 12 | 26.231 | S | 0.500 | 0.667  |
| O10A | 2006 | 173 | 11 | 12 | 27.684 | S | 0.500 | 0.497  |
| N10A | 2006 | 173 | 11 | 12 | 24.355 | S | 0.500 | 0.608  |
| CHF  | 2006 | 173 | 11 | 13 | 0.711  | S | 0.500 | -1.613 |

|      |      |     |    |    |        |   |       |        |
|------|------|-----|----|----|--------|---|-------|--------|
| TIN  | 2006 | 173 | 11 | 12 | 39.705 | S | 0.500 | -0.053 |
| Q09A | 2006 | 173 | 11 | 12 | 32.980 | S | 0.500 | -0.569 |
| RCT  | 2006 | 173 | 11 | 12 | 35.351 | S | 0.500 | -2.026 |
| SN46 | 2006 | 173 | 11 | 12 | 30.136 | S | 0.500 | 0.779  |
| OSI  | 2006 | 173 | 11 | 12 | 54.012 | S | 0.500 | -0.792 |
| PKD  | 2006 | 173 | 11 | 12 | 30.361 | S | 0.500 | -0.255 |
| SN28 | 2006 | 173 | 11 | 12 | 34.645 | S | 0.500 | 1.028  |
| U10A | 2006 | 173 | 11 | 12 | 57.724 | S | 0.500 | -0.540 |
| PACP | 2006 | 173 | 11 | 12 | 16.872 | S | 0.500 | 0.119  |
| BFS  | 2006 | 173 | 11 | 13 | 4.126  | S | 0.500 | -1.639 |
| R06C | 2006 | 173 | 11 | 12 | 19.097 | S | 0.500 | -0.224 |
| SN14 | 2006 | 173 | 11 | 12 | 34.638 | S | 0.500 | -0.673 |
| MWC  | 2006 | 173 | 11 | 13 | 1.225  | S | 0.500 | -1.895 |
| DGR  | 2006 | 173 | 11 | 13 | 13.212 | S | 0.500 | -1.686 |
| O07A | 2006 | 173 | 11 | 12 | 10.560 | S | 0.500 | -0.197 |
| SN15 | 2006 | 173 | 11 | 12 | 35.566 | S | 0.500 | 0.138  |
| SN71 | 2006 | 173 | 11 | 12 | 18.166 | S | 0.500 | -0.279 |
| Q08A | 2006 | 173 | 11 | 12 | 27.071 | S | 0.500 | -0.852 |
| EDW2 | 2006 | 173 | 11 | 12 | 57.082 | S | 0.500 | -0.923 |
| M08A | 2006 | 173 | 11 | 12 | 5.407  | S | 0.500 | 0.772  |
| L05A | 2006 | 173 | 11 | 11 | 43.199 | S | 0.500 | 1.428  |
| SN56 | 2006 | 173 | 11 | 12 | 26.408 | S | 0.500 | 0.364  |
| VCS  | 2006 | 173 | 11 | 12 | 59.306 | S | 0.500 | -1.085 |
| SN27 | 2006 | 173 | 11 | 12 | 35.642 | S | 0.500 | 1.532  |
| SN57 | 2006 | 173 | 11 | 12 | 26.609 | S | 0.500 | 0.853  |
| SVD  | 2006 | 173 | 11 | 13 | 8.697  | S | 0.500 | -2.216 |
| MUR  | 2006 | 173 | 11 | 13 | 12.379 | S | 0.500 | -1.504 |
| SN12 | 2006 | 173 | 11 | 12 | 33.513 | S | 0.500 | -1.253 |
| SN76 | 2006 | 173 | 11 | 12 | 20.021 | S | 0.500 | -0.180 |
| P05C | 2006 | 173 | 11 | 12 | 3.005  | S | 0.500 | -1.491 |
| YBH  | 2006 | 173 | 11 | 11 | 31.779 | S | 0.500 | 2.179  |
| CWC  | 2006 | 173 | 11 | 12 | 45.098 | S | 0.500 | -0.585 |
| O05C | 2006 | 173 | 11 | 11 | 55.991 | S | 0.500 | -0.800 |
| BBR  | 2006 | 173 | 11 | 13 | 8.988  | S | 0.500 | -2.403 |
| ORV  | 2006 | 173 | 11 | 11 | 53.727 | S | 0.500 | -1.681 |
| K04A | 2006 | 173 | 11 | 11 | 32.544 | S | 0.500 | 2.038  |
| I03A | 2006 | 173 | 11 | 11 | 10.158 | S | 0.500 | 1.855  |
| K02A | 2006 | 173 | 11 | 11 | 18.010 | S | 0.500 | 2.208  |
| SN26 | 2006 | 173 | 11 | 12 | 34.367 | S | 0.500 | 0.704  |
| M02C | 2006 | 173 | 11 | 11 | 33.395 | S | 0.500 | 2.374  |
| FUR  | 2006 | 173 | 11 | 12 | 52.758 | S | 0.500 | -1.076 |
| P09A | 2006 | 173 | 11 | 12 | 27.955 | S | 0.500 | -0.454 |
| N09A | 2006 | 173 | 11 | 12 | 15.810 | S | 0.500 | 0.456  |
| LRL  | 2006 | 173 | 11 | 12 | 54.031 | S | 0.500 | -1.928 |
| M07A | 2006 | 173 | 11 | 11 | 59.633 | S | 0.500 | 0.482  |
| SN36 | 2006 | 173 | 11 | 12 | 32.116 | S | 0.500 | 0.299  |
| R08A | 2006 | 173 | 11 | 12 | 30.556 | S | 0.500 | 0.126  |
| L09A | 2006 | 173 | 11 | 12 | 6.503  | S | 0.500 | 1.089  |
| R04C | 2006 | 173 | 11 | 12 | 9.412  | S | 0.500 | -0.092 |
| O09A | 2006 | 173 | 11 | 12 | 23.735 | S | 0.500 | 0.731  |
| MPM  | 2006 | 173 | 11 | 12 | 51.499 | S | 0.500 | -1.549 |
| S04C | 2006 | 173 | 11 | 12 | 13.320 | S | 0.500 | 0.777  |
| SN73 | 2006 | 173 | 11 | 12 | 19.080 | S | 0.500 | -0.449 |
| KCC  | 2006 | 173 | 11 | 12 | 28.780 | S | 0.500 | -0.503 |
| J03A | 2006 | 173 | 11 | 11 | 17.120 | S | 0.500 | 1.866  |
| O06A | 2006 | 173 | 11 | 12 | 3.350  | S | 0.500 | -0.359 |
| SN74 | 2006 | 173 | 11 | 12 | 19.435 | S | 0.500 | -0.318 |
| SN11 | 2006 | 173 | 11 | 12 | 32.478 | S | 0.500 | -1.453 |
| BEK  | 2006 | 173 | 11 | 12 | 1.395  | S | 0.500 | -0.737 |
| N08A | 2006 | 173 | 11 | 12 | 11.856 | S | 0.500 | 0.310  |
| R09A | 2006 | 173 | 11 | 12 | 38.160 | S | 0.500 | -0.946 |

2006 188 7 26 19.6425 -15.24400 -173.61000 35.0000

|      |      |     |   |    |        |   |       |        |
|------|------|-----|---|----|--------|---|-------|--------|
| K02A | 2006 | 188 | 7 | 47 | 20.844 | S | 0.500 | 0.953  |
| PHL  | 2006 | 188 | 7 | 46 | 50.285 | S | 0.500 | 0.361  |
| V05C | 2006 | 188 | 7 | 46 | 59.349 | S | 0.500 | 1.517  |
| PIN  | 2006 | 188 | 7 | 47 | 44.013 | S | 0.500 | 0.022  |
| BNLO | 2006 | 188 | 7 | 46 | 49.679 | S | 0.500 | 0.289  |
| RPV  | 2006 | 188 | 7 | 46 | 55.820 | S | 0.500 | -0.284 |
| BAK  | 2006 | 188 | 7 | 47 | 1.392  | S | 0.500 | 0.886  |
| P07A | 2006 | 188 | 7 | 47 | 29.123 | S | 0.500 | -0.227 |
| WENL | 2006 | 188 | 7 | 46 | 56.431 | S | 0.500 | 0.788  |
| HUMO | 2006 | 188 | 7 | 47 | 22.056 | S | 0.500 | -0.227 |
| Q03C | 2006 | 188 | 7 | 47 | 2.999  | S | 0.500 | 2.329  |
| MNRC | 2006 | 188 | 7 | 47 | 0.890  | S | 0.500 | 1.276  |
| O03C | 2006 | 188 | 7 | 47 | 9.317  | S | 0.500 | -0.632 |
| CVS  | 2006 | 188 | 7 | 46 | 55.378 | S | 0.500 | -0.437 |
| DBO  | 2006 | 188 | 7 | 47 | 24.217 | S | 0.500 | 0.085  |
| P01C | 2006 | 188 | 7 | 46 | 57.643 | S | 0.500 | 0.201  |
| O01C | 2006 | 188 | 7 | 46 | 59.484 | S | 0.500 | 0.616  |
| FMP  | 2006 | 188 | 7 | 46 | 56.453 | S | 0.500 | -0.185 |
| K04A | 2006 | 188 | 7 | 47 | 29.920 | S | 0.500 | -0.508 |
| N02C | 2006 | 188 | 7 | 47 | 7.660  | S | 0.500 | 0.326  |
| O02C | 2006 | 188 | 7 | 47 | 7.506  | S | 0.500 | 1.084  |
| JCS  | 2006 | 188 | 7 | 47 | 7.214  | S | 0.500 | 0.317  |
| SN85 | 2006 | 188 | 7 | 47 | 13.713 | S | 0.500 | -0.078 |
| VTV  | 2006 | 188 | 7 | 47 | 8.633  | S | 0.500 | -0.994 |
| JRSC | 2006 | 188 | 7 | 46 | 51.004 | S | 0.500 | 0.426  |
| L05A | 2006 | 188 | 7 | 47 | 32.097 | S | 0.500 | -0.592 |
| U04C | 2006 | 188 | 7 | 46 | 56.216 | S | 0.500 | 1.718  |
| FUR  | 2006 | 188 | 7 | 47 | 23.435 | S | 0.500 | -1.153 |
| I03A | 2006 | 188 | 7 | 47 | 30.082 | S | 0.500 | 0.281  |
| PKD  | 2006 | 188 | 7 | 46 | 54.473 | S | 0.500 | 1.067  |
| L02A | 2006 | 188 | 7 | 47 | 15.591 | S | 0.500 | 0.693  |
| T05C | 2006 | 188 | 7 | 47 | 0.473  | S | 0.500 | 1.555  |
| V04C | 2006 | 188 | 7 | 46 | 49.844 | S | 0.500 | 0.870  |
| YBH  | 2006 | 188 | 7 | 47 | 18.217 | S | 0.500 | 0.435  |
| MWC  | 2006 | 188 | 7 | 47 | 1.996  | S | 0.500 | -0.202 |
| MPP  | 2006 | 188 | 7 | 46 | 52.681 | S | 0.500 | 0.182  |
| HOPS | 2006 | 188 | 7 | 46 | 56.185 | S | 0.500 | 0.357  |
| Q08A | 2006 | 188 | 7 | 47 | 31.730 | S | 0.500 | -0.168 |
| CHF  | 2006 | 188 | 7 | 47 | 2.642  | S | 0.500 | -0.299 |
| O05C | 2006 | 188 | 7 | 47 | 16.745 | S | 0.500 | -0.874 |
| CWC  | 2006 | 188 | 7 | 47 | 15.994 | S | 0.500 | 0.072  |
| OSI  | 2006 | 188 | 7 | 46 | 58.800 | S | 0.500 | -0.380 |
| O07A | 2006 | 188 | 7 | 47 | 32.107 | S | 0.500 | -1.356 |
| PACP | 2006 | 188 | 7 | 46 | 56.050 | S | 0.500 | 0.798  |
| Q07A | 2006 | 188 | 7 | 47 | 26.078 | S | 0.500 | 0.128  |
| J03A | 2006 | 188 | 7 | 47 | 27.717 | S | 0.500 | 0.429  |
| U05C | 2006 | 188 | 7 | 47 | 1.109  | S | 0.500 | 1.914  |
| SDD  | 2006 | 188 | 7 | 47 | 0.801  | S | 0.500 | 0.217  |
| SN84 | 2006 | 188 | 7 | 47 | 11.370 | S | 0.500 | -0.154 |
| GASB | 2006 | 188 | 7 | 47 | 4.608  | S | 0.500 | 1.407  |
| L07A | 2006 | 188 | 7 | 47 | 41.936 | S | 0.500 | -0.319 |
| M02C | 2006 | 188 | 7 | 47 | 14.871 | S | 0.500 | 0.453  |
| U10A | 2006 | 188 | 7 | 47 | 28.572 | S | 0.500 | -0.127 |
| WDC  | 2006 | 188 | 7 | 47 | 9.828  | S | 0.500 | -0.894 |
| MLAC | 2006 | 188 | 7 | 47 | 19.561 | S | 0.500 | 1.854  |
| SN57 | 2006 | 188 | 7 | 47 | 20.967 | S | 0.500 | 0.991  |
| J06A | 2006 | 188 | 7 | 47 | 43.288 | S | 0.500 | -1.568 |
| HEC  | 2006 | 188 | 7 | 47 | 17.105 | S | 0.500 | -1.943 |
| O08A | 2006 | 188 | 7 | 47 | 38.718 | S | 0.500 | -0.600 |
| R07C | 2006 | 188 | 7 | 47 | 19.934 | S | 0.500 | 0.814  |
| S04C | 2006 | 188 | 7 | 46 | 58.851 | S | 0.500 | 0.724  |
| K06A | 2006 | 188 | 7 | 47 | 40.712 | S | 0.500 | -0.415 |
| EDW2 | 2006 | 188 | 7 | 47 | 6.037  | S | 0.500 | -0.346 |



|      |      |     |   |    |        |   |       |        |
|------|------|-----|---|----|--------|---|-------|--------|
| WVOR | 2006 | 188 | 7 | 47 | 48.729 | S | 0.500 | -0.578 |
| SN67 | 2006 | 188 | 7 | 47 | 20.508 | S | 0.500 | 0.798  |
| M10A | 2006 | 188 | 7 | 47 | 56.490 | S | 0.500 | -1.370 |
| SN73 | 2006 | 188 | 7 | 47 | 9.460  | S | 0.500 | 0.120  |
| O04C | 2006 | 188 | 7 | 47 | 17.767 | S | 0.500 | -1.285 |
| SN76 | 2006 | 188 | 7 | 47 | 18.337 | S | 0.500 | 0.680  |
| O09A | 2006 | 188 | 7 | 47 | 44.546 | S | 0.500 | -0.573 |
| M05C | 2006 | 188 | 7 | 47 | 25.028 | S | 0.500 | -0.744 |
| CIA  | 2006 | 188 | 7 | 46 | 53.816 | S | 0.500 | -0.118 |
| SN54 | 2006 | 188 | 7 | 47 | 13.899 | S | 0.500 | 0.463  |
| DEC  | 2006 | 188 | 7 | 46 | 59.611 | S | 0.500 | -0.101 |
| SUTB | 2006 | 188 | 7 | 47 | 6.643  | S | 0.500 | -0.022 |
| L08A | 2006 | 188 | 7 | 47 | 48.750 | S | 0.500 | -1.095 |
| R10A | 2006 | 188 | 7 | 47 | 39.188 | S | 0.500 | -1.131 |
| LGU  | 2006 | 188 | 7 | 46 | 52.901 | S | 0.500 | -0.175 |
| ORV  | 2006 | 188 | 7 | 47 | 10.829 | S | 0.500 | 0.054  |
| I06A | 2006 | 188 | 7 | 47 | 47.847 | S | 0.500 | -1.029 |
| HAST | 2006 | 188 | 7 | 46 | 49.885 | S | 0.500 | 1.121  |
| M07A | 2006 | 188 | 7 | 47 | 38.323 | S | 0.500 | -0.995 |
| SNCC | 2006 | 188 | 7 | 46 | 45.762 | S | 0.500 | 1.946  |
| M08A | 2006 | 188 | 7 | 47 | 43.970 | S | 0.500 | -0.985 |
| VCS  | 2006 | 188 | 7 | 47 | 2.516  | S | 0.500 | -0.413 |
| M06C | 2006 | 188 | 7 | 47 | 28.454 | S | 0.500 | -0.777 |
| N08A | 2006 | 188 | 7 | 47 | 41.361 | S | 0.500 | -1.007 |
| TPNV | 2006 | 188 | 7 | 47 | 32.012 | S | 0.500 | -0.636 |
| S09A | 2006 | 188 | 7 | 47 | 29.570 | S | 0.500 | -0.527 |
| SN48 | 2006 | 188 | 7 | 47 | 24.740 | S | 0.500 | 1.544  |
| S05C | 2006 | 188 | 7 | 47 | 4.087  | S | 0.500 | -0.370 |
| KCC  | 2006 | 188 | 7 | 47 | 11.879 | S | 0.500 | -0.134 |
| SN55 | 2006 | 188 | 7 | 47 | 16.400 | S | 0.500 | 0.449  |
| GSC  | 2006 | 188 | 7 | 47 | 18.011 | S | 0.500 | -0.309 |
| R05C | 2006 | 188 | 7 | 47 | 16.011 | S | 0.500 | 0.249  |
| SN71 | 2006 | 188 | 7 | 47 | 5.673  | S | 0.500 | 0.058  |
| O10A | 2006 | 188 | 7 | 47 | 49.324 | S | 0.500 | -1.418 |
| N10A | 2006 | 188 | 7 | 47 | 51.899 | S | 0.500 | -1.382 |
| K07A | 2006 | 188 | 7 | 47 | 46.403 | S | 0.500 | -0.558 |
| MUR  | 2006 | 188 | 7 | 47 | 5.026  | S | 0.500 | 0.092  |
| ELFS | 2006 | 188 | 7 | 47 | 22.726 | S | 0.500 | -0.854 |
| GRA  | 2006 | 188 | 7 | 47 | 23.821 | S | 0.500 | -0.576 |
| T06C | 2006 | 188 | 7 | 47 | 6.471  | S | 0.500 | -0.387 |
| P09A | 2006 | 188 | 7 | 47 | 40.394 | S | 0.500 | -1.353 |
| N07B | 2006 | 188 | 7 | 47 | 35.894 | S | 0.500 | -0.678 |
| SN38 | 2006 | 188 | 7 | 47 | 24.981 | S | 0.500 | 1.097  |
| Q09A | 2006 | 188 | 7 | 47 | 36.826 | S | 0.500 | -0.251 |
| M03C | 2006 | 188 | 7 | 47 | 17.444 | S | 0.500 | -1.234 |
| J07A | 2006 | 188 | 7 | 47 | 49.759 | S | 0.500 | -1.193 |
| R09A | 2006 | 188 | 7 | 47 | 34.109 | S | 0.500 | -0.400 |
| TOV  | 2006 | 188 | 7 | 46 | 54.899 | S | 0.500 | -0.261 |
| M04C | 2006 | 188 | 7 | 47 | 23.538 | S | 0.500 | -0.350 |
| K08A | 2006 | 188 | 7 | 47 | 51.497 | S | 0.500 | -0.860 |
| SN66 | 2006 | 188 | 7 | 47 | 18.344 | S | 0.500 | 0.630  |
| SN47 | 2006 | 188 | 7 | 47 | 22.089 | S | 0.500 | 1.327  |
| SN28 | 2006 | 188 | 7 | 47 | 25.022 | S | 0.500 | 0.696  |
| SN24 | 2006 | 188 | 7 | 47 | 14.501 | S | 0.500 | 0.087  |
| Q04C | 2006 | 188 | 7 | 47 | 6.886  | S | 0.500 | 0.281  |
| SN26 | 2006 | 188 | 7 | 47 | 20.494 | S | 0.500 | 0.693  |
| P10A | 2006 | 188 | 7 | 47 | 45.016 | S | 0.500 | -2.144 |
| RCT  | 2006 | 188 | 7 | 47 | 4.011  | S | 0.500 | -1.677 |
| R06C | 2006 | 188 | 7 | 47 | 19.290 | S | 0.500 | 0.452  |
| R04C | 2006 | 188 | 7 | 47 | 5.861  | S | 0.500 | -0.056 |
| N09A | 2006 | 188 | 7 | 47 | 46.013 | S | 0.500 | -1.003 |
| SN43 | 2006 | 188 | 7 | 47 | 11.641 | S | 0.500 | 0.070  |
| PAS  | 2006 | 188 | 7 | 47 | 0.381  | S | 0.500 | 0.084  |

|      |      |     |   |    |        |   |       |        |
|------|------|-----|---|----|--------|---|-------|--------|
| L04A | 2006 | 188 | 7 | 47 | 25.611 | S | 0.500 | -0.722 |
| SN53 | 2006 | 188 | 7 | 47 | 10.755 | S | 0.500 | 0.078  |
| WCN  | 2006 | 188 | 7 | 47 | 22.019 | S | 0.500 | 0.311  |
| SN56 | 2006 | 188 | 7 | 47 | 18.450 | S | 0.500 | 0.731  |
| L09A | 2006 | 188 | 7 | 47 | 52.009 | S | 0.500 | -1.209 |
| R08A | 2006 | 188 | 7 | 47 | 27.901 | S | 0.500 | 0.458  |
| M09A | 2006 | 188 | 7 | 47 | 49.909 | S | 0.500 | -1.193 |
| SLA  | 2006 | 188 | 7 | 47 | 18.609 | S | 0.500 | 0.206  |
| SVD  | 2006 | 188 | 7 | 47 | 8.911  | S | 0.500 | 0.062  |
| O06A | 2006 | 188 | 7 | 47 | 26.020 | S | 0.500 | -0.895 |
| SN52 | 2006 | 188 | 7 | 47 | 8.300  | S | 0.500 | 0.072  |
| SN51 | 2006 | 188 | 7 | 47 | 5.915  | S | 0.500 | 0.214  |
| J08A | 2006 | 188 | 7 | 47 | 55.452 | S | 0.500 | -0.744 |
| SN23 | 2006 | 188 | 7 | 47 | 11.299 | S | 0.500 | -0.492 |
| CMB  | 2006 | 188 | 7 | 47 | 9.225  | S | 0.500 | 0.633  |
| SN15 | 2006 | 188 | 7 | 47 | 17.994 | S | 0.500 | 0.747  |
| HELL | 2006 | 188 | 7 | 47 | 8.851  | S | 0.500 | -1.251 |
| PLM  | 2006 | 188 | 7 | 47 | 6.287  | S | 0.500 | 0.020  |
| SN44 | 2006 | 188 | 7 | 47 | 13.820 | S | 0.500 | 0.319  |
| DGR  | 2006 | 188 | 7 | 47 | 6.573  | S | 0.500 | -0.048 |
| SN14 | 2006 | 188 | 7 | 47 | 15.163 | S | 0.500 | -0.108 |
| LRL  | 2006 | 188 | 7 | 47 | 13.599 | S | 0.500 | 0.959  |
| SN74 | 2006 | 188 | 7 | 47 | 11.791 | S | 0.500 | 0.025  |
| SN37 | 2006 | 188 | 7 | 47 | 22.182 | S | 0.500 | 1.077  |
| SN12 | 2006 | 188 | 7 | 47 | 10.726 | S | 0.500 | -0.799 |
| SN64 | 2006 | 188 | 7 | 47 | 13.418 | S | 0.500 | 0.063  |
| SN11 | 2006 | 188 | 7 | 47 | 6.512  | S | 0.500 | -1.072 |
| SHO  | 2006 | 188 | 7 | 47 | 25.506 | S | 0.500 | -0.524 |
| S06C | 2006 | 188 | 7 | 47 | 11.658 | S | 0.500 | -0.225 |
| SN16 | 2006 | 188 | 7 | 47 | 20.994 | S | 0.500 | 0.700  |
| TIN  | 2006 | 188 | 7 | 47 | 18.856 | S | 0.500 | 0.442  |
| SN46 | 2006 | 188 | 7 | 47 | 20.217 | S | 0.500 | 1.701  |
| S08C | 2006 | 188 | 7 | 47 | 23.410 | S | 0.500 | 1.442  |
| BFS  | 2006 | 188 | 7 | 47 | 5.398  | S | 0.500 | 0.240  |
| SN34 | 2006 | 188 | 7 | 47 | 14.852 | S | 0.500 | 0.253  |
| SN63 | 2006 | 188 | 7 | 47 | 10.916 | S | 0.500 | -0.260 |
| P06A | 2006 | 188 | 7 | 47 | 23.020 | S | 0.500 | -0.150 |
| LAVA | 2006 | 188 | 7 | 47 | 11.036 | S | 0.500 | 0.233  |
| SN27 | 2006 | 188 | 7 | 47 | 23.502 | S | 0.500 | 1.982  |
| SN25 | 2006 | 188 | 7 | 47 | 18.088 | S | 0.500 | 0.913  |
| BBR  | 2006 | 188 | 7 | 47 | 11.168 | S | 0.500 | -0.331 |
| MPM  | 2006 | 188 | 7 | 47 | 18.527 | S | 0.500 | 0.688  |

|      |      |     |    |         |          |           |         |        |       |
|------|------|-----|----|---------|----------|-----------|---------|--------|-------|
| 2006 | 253  | 14  | 56 | 10.1202 | 26.31900 | -86.60600 | 14.0000 | 24     | 1.960 |
| J05A | 2006 | 253 | 15 | 7       | 58.868   | S         | 0.500   | -1.539 |       |
| K08A | 2006 | 253 | 15 | 7       | 27.883   | S         | 0.500   | -0.069 |       |
| SNE4 | 2006 | 253 | 15 | 7       | 42.081   | S         | 0.500   | -1.299 |       |
| R06C | 2006 | 253 | 15 | 7       | 20.476   | S         | 0.500   | 1.881  |       |
| SND5 | 2006 | 253 | 15 | 7       | 37.498   | S         | 0.500   | -0.928 |       |
| SND4 | 2006 | 253 | 15 | 7       | 39.480   | S         | 0.500   | -1.143 |       |
| S06C | 2006 | 253 | 15 | 7       | 21.867   | S         | 0.500   | 0.736  |       |
| SN64 | 2006 | 253 | 15 | 7       | 20.176   | S         | 0.500   | 1.435  |       |
| SNC6 | 2006 | 253 | 15 | 7       | 32.781   | S         | 0.500   | -0.031 |       |
| LAVA | 2006 | 253 | 15 | 7       | 34.581   | S         | 0.500   | 0.047  |       |
| SNB5 | 2006 | 253 | 15 | 7       | 32.917   | S         | 0.500   | 0.252  |       |
| SN85 | 2006 | 253 | 15 | 7       | 25.555   | S         | 0.500   | 1.710  |       |
| SN75 | 2006 | 253 | 15 | 7       | 22.151   | S         | 0.500   | 1.696  |       |
| SN74 | 2006 | 253 | 15 | 7       | 23.574   | S         | 0.500   | 1.224  |       |
| SN96 | 2006 | 253 | 15 | 7       | 27.184   | S         | 0.500   | 1.497  |       |
| SNC5 | 2006 | 253 | 15 | 7       | 35.288   | S         | 0.500   | -0.592 |       |
| R05C | 2006 | 253 | 15 | 7       | 28.020   | S         | 0.500   | 1.092  |       |
| J07A | 2006 | 253 | 15 | 7       | 39.260   | S         | 0.500   | -0.977 |       |
| M06C | 2006 | 253 | 15 | 7       | 39.776   | S         | 0.500   | -1.954 |       |

|      |      |     |    |   |        |   |       |        |
|------|------|-----|----|---|--------|---|-------|--------|
| K06A | 2006 | 253 | 15 | 7 | 45.833 | S | 0.500 | -1.269 |
| JRSC | 2006 | 253 | 15 | 7 | 49.393 | S | 0.500 | 1.108  |
| SNA4 | 2006 | 253 | 15 | 7 | 31.750 | S | 0.500 | 0.461  |
| SUTB | 2006 | 253 | 15 | 7 | 48.061 | S | 0.500 | -0.534 |
| SND7 | 2006 | 253 | 15 | 7 | 35.856 | S | 0.500 | -0.296 |
| L07A | 2006 | 253 | 15 | 7 | 33.064 | S | 0.500 | -0.123 |
| PACP | 2006 | 253 | 15 | 7 | 34.795 | S | 0.500 | -1.054 |
| K09A | 2006 | 253 | 15 | 7 | 19.953 | S | 0.500 | 0.541  |
| WENL | 2006 | 253 | 15 | 7 | 44.238 | S | 0.500 | 1.201  |
| SNA3 | 2006 | 253 | 15 | 7 | 33.661 | S | 0.500 | 0.834  |
| MOD  | 2006 | 253 | 15 | 7 | 41.412 | S | 0.500 | -1.717 |
| SN93 | 2006 | 253 | 15 | 7 | 30.979 | S | 0.500 | 0.132  |
| N06A | 2006 | 253 | 15 | 7 | 30.174 | S | 0.500 | -2.173 |
| M07A | 2006 | 253 | 15 | 7 | 26.874 | S | 0.500 | -1.237 |
| PHL  | 2006 | 253 | 15 | 7 | 22.268 | S | 0.500 | -0.323 |
| J08A | 2006 | 253 | 15 | 7 | 30.549 | S | 0.500 | -0.805 |
| SNE5 | 2006 | 253 | 15 | 7 | 40.765 | S | 0.500 | -1.154 |
| SNE6 | 2006 | 253 | 15 | 7 | 37.826 | S | 0.500 | -0.906 |
| SNB3 | 2006 | 253 | 15 | 7 | 36.990 | S | 0.500 | 0.143  |
| SN63 | 2006 | 253 | 15 | 7 | 20.618 | S | 0.500 | 0.493  |
| SN97 | 2006 | 253 | 15 | 7 | 25.030 | S | 0.500 | 0.987  |
| SNA8 | 2006 | 253 | 15 | 7 | 23.062 | S | 0.500 | 0.408  |
| SN87 | 2006 | 253 | 15 | 7 | 22.640 | S | 0.500 | 1.145  |
| SNB7 | 2006 | 253 | 15 | 7 | 29.531 | S | 0.500 | 0.416  |
| K07A | 2006 | 253 | 15 | 7 | 35.580 | S | 0.500 | -0.092 |
| SNB9 | 2006 | 253 | 15 | 7 | 23.564 | S | 0.500 | -0.145 |
| L08A | 2006 | 253 | 15 | 7 | 22.496 | S | 0.500 | -0.825 |
| R04C | 2006 | 253 | 15 | 7 | 35.655 | S | 0.500 | 0.530  |
| SN84 | 2006 | 253 | 15 | 7 | 26.895 | S | 0.500 | 1.245  |
| S04C | 2006 | 253 | 15 | 7 | 37.887 | S | 0.500 | 0.411  |
| WVOR | 2006 | 253 | 15 | 7 | 27.331 | S | 0.500 | -0.437 |

|      |      |     |    |         |           |            |         |        |       |
|------|------|-----|----|---------|-----------|------------|---------|--------|-------|
| 2006 | 271  | 6   | 22 | 16.9733 | -16.59200 | -172.03300 | 28.0000 | 25     | 7.243 |
| N08A | 2006 | 271 | 6  | 43      | 41.379    | S          | 0.500   | -0.612 |       |
| O08A | 2006 | 271 | 6  | 43      | 37.981    | S          | 0.500   | -0.797 |       |
| L08A | 2006 | 271 | 6  | 43      | 49.201    | S          | 0.500   | -0.754 |       |
| K08A | 2006 | 271 | 6  | 43      | 52.242    | S          | 0.500   | -0.416 |       |
| PIN  | 2006 | 271 | 6  | 43      | 44.230    | S          | 0.500   | -0.833 |       |
| S09A | 2006 | 271 | 6  | 43      | 28.362    | S          | 0.500   | -0.179 |       |
| M06C | 2006 | 271 | 6  | 43      | 28.899    | S          | 0.500   | -0.533 |       |
| O03C | 2006 | 271 | 6  | 43      | 9.042     | S          | 0.500   | -1.042 |       |
| SN55 | 2006 | 271 | 6  | 43      | 15.437    | S          | 0.500   | 0.604  |       |
| I08A | 2006 | 271 | 6  | 43      | 58.270    | S          | 0.500   | -1.626 |       |
| M04C | 2006 | 271 | 6  | 43      | 24.383    | S          | 0.500   | -0.152 |       |
| DJJ  | 2006 | 271 | 6  | 42      | 55.420    | S          | 0.500   | 0.243  |       |
| WVOR | 2006 | 271 | 6  | 43      | 49.209    | S          | 0.500   | -0.333 |       |
| L07A | 2006 | 271 | 6  | 43      | 42.467    | S          | 0.500   | -0.028 |       |
| R06C | 2006 | 271 | 6  | 43      | 18.716    | S          | 0.500   | 0.748  |       |
| K04A | 2006 | 271 | 6  | 43      | 31.047    | S          | 0.500   | -0.266 |       |
| FUR  | 2006 | 271 | 6  | 43      | 22.030    | S          | 0.500   | -0.494 |       |
| BMN  | 2006 | 271 | 6  | 43      | 44.533    | S          | 0.500   | -1.419 |       |
| J07A | 2006 | 271 | 6  | 43      | 51.101    | S          | 0.500   | -0.512 |       |
| CVS  | 2006 | 271 | 6  | 42      | 55.108    | S          | 0.500   | -0.388 |       |
| ELFS | 2006 | 271 | 6  | 43      | 22.985    | S          | 0.500   | -0.657 |       |
| Q09A | 2006 | 271 | 6  | 43      | 35.633    | S          | 0.500   | -0.252 |       |
| DBO  | 2006 | 271 | 6  | 43      | 26.103    | S          | 0.500   | 0.640  |       |
| J03A | 2006 | 271 | 6  | 43      | 29.570    | S          | 0.500   | 0.919  |       |
| O06A | 2006 | 271 | 6  | 43      | 25.657    | S          | 0.500   | -1.001 |       |
| PACP | 2006 | 271 | 6  | 42      | 55.034    | S          | 0.500   | 0.802  |       |
| O10A | 2006 | 271 | 6  | 43      | 48.543    | S          | 0.500   | -1.372 |       |
| N09A | 2006 | 271 | 6  | 43      | 45.843    | S          | 0.500   | -0.716 |       |
| SN87 | 2006 | 271 | 6  | 43      | 18.292    | S          | 0.500   | -0.043 |       |
| SNE7 | 2006 | 271 | 6  | 43      | 17.286    | S          | 0.500   | -0.852 |       |

|      |      |     |   |    |        |   |       |        |
|------|------|-----|---|----|--------|---|-------|--------|
| DGR  | 2006 | 271 | 6 | 43 | 4.193  | S | 0.500 | 0.605  |
| K09A | 2006 | 271 | 6 | 43 | 56.607 | S | 0.500 | -0.600 |
| SNC8 | 2006 | 271 | 6 | 43 | 20.165 | S | 0.500 | -0.587 |
| L04A | 2006 | 271 | 6 | 43 | 26.387 | S | 0.500 | -0.724 |
| K07A | 2006 | 271 | 6 | 43 | 47.275 | S | 0.500 | -0.124 |
| N10A | 2006 | 271 | 6 | 43 | 51.507 | S | 0.500 | -1.098 |
| GRA  | 2006 | 271 | 6 | 43 | 22.639 | S | 0.500 | 0.030  |
| J09A | 2006 | 271 | 6 | 44 | 0.751  | S | 0.500 | -0.571 |
| ADO  | 2006 | 271 | 6 | 43 | 5.523  | S | 0.500 | -0.837 |
| SNG7 | 2006 | 271 | 6 | 43 | 15.429 | S | 0.500 | -1.745 |
| N06A | 2006 | 271 | 6 | 43 | 29.590 | S | 0.500 | -0.943 |
| SNG5 | 2006 | 271 | 6 | 43 | 11.107 | S | 0.500 | -0.590 |
| J08A | 2006 | 271 | 6 | 43 | 56.437 | S | 0.500 | -0.256 |
| SND5 | 2006 | 271 | 6 | 43 | 11.889 | S | 0.500 | -0.122 |
| SLA  | 2006 | 271 | 6 | 43 | 16.728 | S | 0.500 | 0.500  |
| ORV  | 2006 | 271 | 6 | 43 | 10.803 | S | 0.500 | 0.141  |
| L02A | 2006 | 271 | 6 | 43 | 16.915 | S | 0.500 | 0.900  |
| SND8 | 2006 | 271 | 6 | 43 | 20.056 | S | 0.500 | -0.181 |
| ARV  | 2006 | 271 | 6 | 42 | 59.645 | S | 0.500 | 0.585  |
| M05C | 2006 | 271 | 6 | 43 | 25.603 | S | 0.500 | -0.538 |
| RRX  | 2006 | 271 | 6 | 43 | 10.279 | S | 0.500 | -1.285 |
| MUR  | 2006 | 271 | 6 | 43 | 2.361  | S | 0.500 | 0.452  |
| K02A | 2006 | 271 | 6 | 43 | 22.127 | S | 0.500 | 0.958  |
| OSI  | 2006 | 271 | 6 | 42 | 56.834 | S | 0.500 | 0.024  |
| JCS  | 2006 | 271 | 6 | 43 | 3.655  | S | 0.500 | 0.060  |
| SNA8 | 2006 | 271 | 6 | 43 | 20.764 | S | 0.500 | -0.102 |
| SUTB | 2006 | 271 | 6 | 43 | 5.520  | S | 0.500 | -0.973 |
| SNC6 | 2006 | 271 | 6 | 43 | 14.331 | S | 0.500 | -0.586 |
| SVD  | 2006 | 271 | 6 | 43 | 6.262  | S | 0.500 | 0.258  |
| VES  | 2006 | 271 | 6 | 43 | 1.945  | S | 0.500 | 0.077  |
| R07C | 2006 | 271 | 6 | 43 | 18.887 | S | 0.500 | 0.854  |
| VCS  | 2006 | 271 | 6 | 43 | 0.340  | S | 0.500 | -0.056 |
| M03C | 2006 | 271 | 6 | 43 | 18.190 | S | 0.500 | -1.031 |
| SN85 | 2006 | 271 | 6 | 43 | 13.112 | S | 0.500 | 0.172  |
| PLM  | 2006 | 271 | 6 | 43 | 3.523  | S | 0.500 | 0.426  |
| GASB | 2006 | 271 | 6 | 43 | 4.418  | S | 0.500 | 1.069  |
| SNB9 | 2006 | 271 | 6 | 43 | 22.851 | S | 0.500 | 0.014  |
| DEC  | 2006 | 271 | 6 | 42 | 57.093 | S | 0.500 | -0.050 |
| SNC5 | 2006 | 271 | 6 | 43 | 12.177 | S | 0.500 | -0.056 |
| SNB5 | 2006 | 271 | 6 | 43 | 12.391 | S | 0.500 | 0.026  |
| TIN  | 2006 | 271 | 6 | 43 | 17.303 | S | 0.500 | 0.486  |
| SNA7 | 2006 | 271 | 6 | 43 | 18.739 | S | 0.500 | 0.314  |
| CHF  | 2006 | 271 | 6 | 43 | 0.195  | S | 0.500 | -0.142 |
| R08A | 2006 | 271 | 6 | 43 | 27.165 | S | 0.500 | 0.922  |
| SND4 | 2006 | 271 | 6 | 43 | 9.491  | S | 0.500 | 0.124  |
| SND7 | 2006 | 271 | 6 | 43 | 17.300 | S | 0.500 | -0.518 |
| SN97 | 2006 | 271 | 6 | 43 | 17.974 | S | 0.500 | 0.340  |
| MWC  | 2006 | 271 | 6 | 42 | 59.165 | S | 0.500 | -0.393 |
| O04C | 2006 | 271 | 6 | 43 | 17.802 | S | 0.500 | -1.282 |
| MLAC | 2006 | 271 | 6 | 43 | 17.969 | S | 0.500 | 1.553  |
| Q04C | 2006 | 271 | 6 | 43 | 6.301  | S | 0.500 | 0.082  |
| BFS  | 2006 | 271 | 6 | 43 | 2.498  | S | 0.500 | 0.042  |
| P05C | 2006 | 271 | 6 | 43 | 15.165 | S | 0.500 | -0.080 |
| O02C | 2006 | 271 | 6 | 43 | 7.197  | S | 0.500 | 0.432  |
| HEC  | 2006 | 271 | 6 | 43 | 15.031 | S | 0.500 | -1.291 |
| SNE5 | 2006 | 271 | 6 | 43 | 11.715 | S | 0.500 | -0.315 |
| J02A | 2006 | 271 | 6 | 43 | 25.928 | S | 0.500 | 0.902  |
| N02C | 2006 | 271 | 6 | 43 | 7.713  | S | 0.500 | -0.271 |
| LRL  | 2006 | 271 | 6 | 43 | 11.696 | S | 0.500 | 1.319  |
| M02C | 2006 | 271 | 6 | 43 | 15.556 | S | 0.500 | 0.402  |
| SNE4 | 2006 | 271 | 6 | 43 | 9.507  | S | 0.500 | 0.115  |
| GSC  | 2006 | 271 | 6 | 43 | 15.837 | S | 0.500 | 0.013  |
| BBR  | 2006 | 271 | 6 | 43 | 8.643  | S | 0.500 | -0.026 |

|      |      |     |   |    |        |   |       |        |
|------|------|-----|---|----|--------|---|-------|--------|
| EDW2 | 2006 | 271 | 6 | 43 | 3.829  | S | 0.500 | -0.139 |
| SHO  | 2006 | 271 | 6 | 43 | 23.749 | S | 0.500 | 0.075  |
| VTV  | 2006 | 271 | 6 | 43 | 6.339  | S | 0.500 | -0.643 |
| R04C | 2006 | 271 | 6 | 43 | 5.293  | S | 0.500 | 0.039  |
| SNB7 | 2006 | 271 | 6 | 43 | 16.703 | S | 0.500 | -0.241 |
| SNB3 | 2006 | 271 | 6 | 43 | 7.432  | S | 0.500 | 0.156  |
| SNE6 | 2006 | 271 | 6 | 43 | 14.535 | S | 0.500 | -0.452 |
| CMB  | 2006 | 271 | 6 | 43 | 8.172  | S | 0.500 | 0.432  |
| SNB6 | 2006 | 271 | 6 | 43 | 14.770 | S | 0.500 | -0.085 |
| SN95 | 2006 | 271 | 6 | 43 | 11.004 | S | 0.500 | -0.129 |
| SNC7 | 2006 | 271 | 6 | 43 | 16.847 | S | 0.500 | -0.149 |
| SNF6 | 2006 | 271 | 6 | 43 | 14.073 | S | 0.500 | -0.669 |
| CWC  | 2006 | 271 | 6 | 43 | 14.551 | S | 0.500 | 0.479  |
| SNA3 | 2006 | 271 | 6 | 43 | 8.566  | S | 0.500 | 0.736  |
| YBH  | 2006 | 271 | 6 | 43 | 19.126 | S | 0.500 | 0.529  |
| SN84 | 2006 | 271 | 6 | 43 | 10.510 | S | 0.500 | -0.161 |
| LAVA | 2006 | 271 | 6 | 43 | 10.443 | S | 0.500 | 0.183  |
| SNA4 | 2006 | 271 | 6 | 43 | 10.271 | S | 0.500 | 0.259  |
| S08C | 2006 | 271 | 6 | 43 | 21.748 | S | 0.500 | 1.252  |
| SN63 | 2006 | 271 | 6 | 43 | 9.893  | S | 0.500 | -0.216 |
| WCN  | 2006 | 271 | 6 | 43 | 21.365 | S | 0.500 | 0.220  |
| S05C | 2006 | 271 | 6 | 43 | 3.040  | S | 0.500 | -0.320 |
| SN43 | 2006 | 271 | 6 | 43 | 10.450 | S | 0.500 | 0.107  |
| R05C | 2006 | 271 | 6 | 43 | 15.369 | S | 0.500 | 0.299  |
| SN75 | 2006 | 271 | 6 | 43 | 14.027 | S | 0.500 | 0.040  |
| SN74 | 2006 | 271 | 6 | 43 | 10.831 | S | 0.500 | 0.020  |
| RCT  | 2006 | 271 | 6 | 43 | 2.943  | S | 0.500 | -1.063 |
| WDC  | 2006 | 271 | 6 | 43 | 10.294 | S | 0.500 | -0.844 |
| HELL | 2006 | 271 | 6 | 43 | 7.469  | S | 0.500 | -1.050 |
| T06C | 2006 | 271 | 6 | 43 | 5.235  | S | 0.500 | -0.295 |
| SN34 | 2006 | 271 | 6 | 43 | 13.822 | S | 0.500 | 0.548  |
| SN96 | 2006 | 271 | 6 | 43 | 13.814 | S | 0.500 | 0.058  |
| S06C | 2006 | 271 | 6 | 43 | 10.647 | S | 0.500 | -0.214 |
| ISA  | 2006 | 271 | 6 | 43 | 6.236  | S | 0.500 | 0.680  |
| SN64 | 2006 | 271 | 6 | 43 | 12.261 | S | 0.500 | -0.047 |
| MPM  | 2006 | 271 | 6 | 43 | 16.592 | S | 0.500 | 0.842  |
| SN93 | 2006 | 271 | 6 | 43 | 7.722  | S | 0.500 | 0.852  |
| SN14 | 2006 | 271 | 6 | 43 | 13.741 | S | 0.500 | -0.050 |
| SNCC | 2006 | 271 | 6 | 42 | 43.258 | S | 0.500 | 2.150  |
| V03C | 2006 | 271 | 6 | 42 | 48.874 | S | 0.500 | 1.671  |
| O07A | 2006 | 271 | 6 | 43 | 31.661 | S | 0.500 | -1.359 |
| HAST | 2006 | 271 | 6 | 42 | 48.962 | S | 0.500 | 1.373  |
| JRSC | 2006 | 271 | 6 | 42 | 50.623 | S | 0.500 | 0.731  |
| BAK  | 2006 | 271 | 6 | 42 | 59.760 | S | 0.500 | 1.299  |
| HOPS | 2006 | 271 | 6 | 42 | 56.058 | S | 0.500 | 0.199  |
| MCCM | 2006 | 271 | 6 | 42 | 50.804 | S | 0.500 | 0.020  |
| USC  | 2006 | 271 | 6 | 42 | 57.291 | S | 0.500 | 1.491  |
| SNF8 | 2006 | 271 | 6 | 43 | 18.632 | S | 0.500 | -1.669 |
| T05C | 2006 | 271 | 6 | 43 | 0.092  | S | 0.500 | 2.360  |
| BNLO | 2006 | 271 | 6 | 42 | 48.942 | S | 0.500 | 0.354  |
| N07B | 2006 | 271 | 6 | 43 | 36.015 | S | 0.500 | -0.340 |
| O01C | 2006 | 271 | 6 | 42 | 59.635 | S | 0.500 | 0.229  |
| M08A | 2006 | 271 | 6 | 43 | 43.894 | S | 0.500 | -0.942 |
| SDD  | 2006 | 271 | 6 | 42 | 58.803 | S | 0.500 | 1.176  |
| HATC | 2006 | 271 | 6 | 43 | 19.173 | S | 0.500 | -1.089 |
| CIA  | 2006 | 271 | 6 | 42 | 51.103 | S | 0.500 | 0.033  |
| RPV  | 2006 | 271 | 6 | 42 | 53.380 | S | 0.500 | 0.021  |
| U04C | 2006 | 271 | 6 | 42 | 55.425 | S | 0.500 | 2.267  |
| U10A | 2006 | 271 | 6 | 43 | 26.707 | S | 0.500 | 0.182  |
| I09A | 2006 | 271 | 6 | 44 | 3.716  | S | 0.500 | -1.721 |
| MNRC | 2006 | 271 | 6 | 43 | 1.191  | S | 0.500 | 1.721  |
| BDM  | 2006 | 271 | 6 | 42 | 57.969 | S | 0.500 | 1.458  |
| I03A | 2006 | 271 | 6 | 43 | 31.774 | S | 0.500 | 0.360  |

|      |      |     |   |    |        |   |       |        |
|------|------|-----|---|----|--------|---|-------|--------|
| Q03C | 2006 | 271 | 6 | 43 | 2.930  | S | 0.500 | 2.583  |
| P01C | 2006 | 271 | 6 | 42 | 57.277 | S | 0.500 | -0.390 |
| J06A | 2006 | 271 | 6 | 43 | 44.600 | S | 0.500 | -1.023 |
| M09A | 2006 | 271 | 6 | 43 | 50.008 | S | 0.500 | -0.816 |
| FMP  | 2006 | 271 | 6 | 42 | 54.032 | S | 0.500 | 0.174  |
| J05A | 2006 | 271 | 6 | 43 | 39.250 | S | 0.500 | 0.034  |
| V05C | 2006 | 271 | 6 | 42 | 58.307 | S | 0.500 | 2.180  |
| O05C | 2006 | 271 | 6 | 43 | 16.782 | S | 0.500 | -0.732 |
| Q07A | 2006 | 271 | 6 | 43 | 25.119 | S | 0.500 | 0.037  |
| L09A | 2006 | 271 | 6 | 43 | 52.335 | S | 0.500 | -0.821 |
| MPP  | 2006 | 271 | 6 | 42 | 51.477 | S | 0.500 | 1.029  |
| Q08A | 2006 | 271 | 6 | 43 | 30.582 | S | 0.500 | -0.284 |
| SMM  | 2006 | 271 | 6 | 42 | 52.617 | S | 0.500 | 0.754  |
| BEK  | 2006 | 271 | 6 | 43 | 20.407 | S | 0.500 | -0.618 |
| S04C | 2006 | 271 | 6 | 42 | 58.562 | S | 0.500 | 1.266  |
| P09A | 2006 | 271 | 6 | 43 | 39.582 | S | 0.500 | -1.200 |
| P06A | 2006 | 271 | 6 | 43 | 22.413 | S | 0.500 | -0.334 |
| I06A | 2006 | 271 | 6 | 43 | 49.278 | S | 0.500 | -0.584 |
| WENL | 2006 | 271 | 6 | 42 | 55.921 | S | 0.500 | 0.997  |
| K05A | 2006 | 271 | 6 | 43 | 37.426 | S | 0.500 | -0.085 |
| M10A | 2006 | 271 | 6 | 43 | 56.462 | S | 0.500 | -0.967 |
| K06A | 2006 | 271 | 6 | 43 | 41.706 | S | 0.500 | -0.069 |
| O09A | 2006 | 271 | 6 | 43 | 43.446 | S | 0.500 | -0.940 |
| V04C | 2006 | 271 | 6 | 42 | 48.668 | S | 0.500 | 1.291  |

|      |      |     |    |         |          |           |         |        |       |
|------|------|-----|----|---------|----------|-----------|---------|--------|-------|
| 2006 | 272  | 13  | 8  | 29.2822 | 10.87600 | -61.75600 | 53.0000 | 26     | 3.122 |
| J02A | 2006 | 272 | 13 | 27      | 6.114    | S         | 0.500   | -1.098 |       |
| M10A | 2006 | 272 | 13 | 25      | 56.974   | S         | 0.500   | 0.105  |       |
| TIN  | 2006 | 272 | 13 | 26      | 1.497    | S         | 0.500   | 2.323  |       |
| HOPS | 2006 | 272 | 13 | 26      | 55.227   | S         | 0.500   | 2.921  |       |
| L07A | 2006 | 272 | 13 | 26      | 24.008   | S         | 0.500   | -0.930 |       |
| VES  | 2006 | 272 | 13 | 26      | 5.743    | S         | 0.500   | 1.078  |       |
| M06C | 2006 | 272 | 13 | 26      | 31.406   | S         | 0.500   | -1.751 |       |
| O07A | 2006 | 272 | 13 | 26      | 12.163   | S         | 0.500   | -2.395 |       |
| M08A | 2006 | 272 | 13 | 26      | 13.559   | S         | 0.500   | -0.335 |       |
| BEK  | 2006 | 272 | 13 | 26      | 25.438   | S         | 0.500   | -2.869 |       |
| V04C | 2006 | 272 | 13 | 26      | 24.010   | S         | 0.500   | 0.880  |       |
| M07A | 2006 | 272 | 13 | 26      | 20.260   | S         | 0.500   | -1.130 |       |
| P01C | 2006 | 272 | 13 | 26      | 58.740   | S         | 0.500   | 2.592  |       |
| SUTB | 2006 | 272 | 13 | 26      | 40.021   | S         | 0.500   | -0.375 |       |
| BDM  | 2006 | 272 | 13 | 26      | 39.962   | S         | 0.500   | 1.779  |       |
| PLM  | 2006 | 272 | 13 | 25      | 37.209   | S         | 0.500   | 1.994  |       |
| P09A | 2006 | 272 | 13 | 25      | 53.114   | S         | 0.500   | -2.615 |       |
| O10A | 2006 | 272 | 13 | 25      | 50.234   | S         | 0.500   | -1.725 |       |
| L02A | 2006 | 272 | 13 | 27      | 2.618    | S         | 0.500   | -2.083 |       |
| O05C | 2006 | 272 | 13 | 26      | 32.402   | S         | 0.500   | -1.444 |       |
| SN84 | 2006 | 272 | 13 | 26      | 21.662   | S         | 0.500   | -0.125 |       |
| JCS  | 2006 | 272 | 13 | 25      | 33.106   | S         | 0.500   | 1.613  |       |
| O01C | 2006 | 272 | 13 | 27      | 1.981    | S         | 0.500   | -0.160 |       |
| BBR  | 2006 | 272 | 13 | 25      | 39.297   | S         | 0.500   | 1.155  |       |
| TOV  | 2006 | 272 | 13 | 25      | 58.806   | S         | 0.500   | 0.775  |       |
| CHF  | 2006 | 272 | 13 | 25      | 50.717   | S         | 0.500   | 0.461  |       |
| PIN  | 2006 | 272 | 13 | 26      | 44.224   | S         | 0.500   | -0.408 |       |
| SHO  | 2006 | 272 | 13 | 25      | 36.438   | S         | 0.500   | 1.119  |       |
| SN97 | 2006 | 272 | 13 | 26      | 20.200   | S         | 0.500   | 0.014  |       |
| SN87 | 2006 | 272 | 13 | 26      | 18.421   | S         | 0.500   | 0.230  |       |
| GRA  | 2006 | 272 | 13 | 25      | 51.422   | S         | 0.500   | 1.302  |       |
| FUR  | 2006 | 272 | 13 | 25      | 44.443   | S         | 0.500   | 1.336  |       |
| DGR  | 2006 | 272 | 13 | 25      | 38.749   | S         | 0.500   | 1.404  |       |
| SVD  | 2006 | 272 | 13 | 25      | 40.571   | S         | 0.500   | 1.253  |       |
| SNE6 | 2006 | 272 | 13 | 26      | 30.674   | S         | 0.500   | -1.389 |       |
| BFS  | 2006 | 272 | 13 | 25      | 46.872   | S         | 0.500   | 0.895  |       |
| SN93 | 2006 | 272 | 13 | 26      | 26.189   | S         | 0.500   | 0.110  |       |

|      |      |     |    |    |        |   |       |        |
|------|------|-----|----|----|--------|---|-------|--------|
| VTV  | 2006 | 272 | 13 | 25 | 43.436 | S | 0.500 | 0.325  |
| WENL | 2006 | 272 | 13 | 26 | 38.029 | S | 0.500 | 1.722  |
| SN95 | 2006 | 272 | 13 | 26 | 23.331 | S | 0.500 | -0.106 |
| SNC7 | 2006 | 272 | 13 | 26 | 26.261 | S | 0.500 | -1.026 |
| K02A | 2006 | 272 | 13 | 27 | 3.017  | S | 0.500 | -2.257 |
| N09A | 2006 | 272 | 13 | 26 | 2.044  | S | 0.500 | -1.883 |
| N08A | 2006 | 272 | 13 | 26 | 7.759  | S | 0.500 | -1.673 |
| M03C | 2006 | 272 | 13 | 26 | 47.048 | S | 0.500 | -1.802 |
| SN63 | 2006 | 272 | 13 | 26 | 17.372 | S | 0.500 | 0.048  |
| SN85 | 2006 | 272 | 13 | 26 | 20.679 | S | 0.500 | 0.402  |
| SN14 | 2006 | 272 | 13 | 26 | 6.470  | S | 0.500 | 0.904  |
| Q08A | 2006 | 272 | 13 | 25 | 59.661 | S | 0.500 | -1.706 |
| CVS  | 2006 | 272 | 13 | 26 | 45.526 | S | 0.500 | 0.564  |
| SN55 | 2006 | 272 | 13 | 26 | 13.994 | S | 0.500 | 0.776  |
| O08A | 2006 | 272 | 13 | 26 | 5.915  | S | 0.500 | -2.416 |
| S06C | 2006 | 272 | 13 | 26 | 18.209 | S | 0.500 | 0.121  |
| CIA  | 2006 | 272 | 13 | 25 | 53.471 | S | 0.500 | 1.413  |
| LAVA | 2006 | 272 | 13 | 26 | 28.355 | S | 0.500 | -0.619 |
| MUR  | 2006 | 272 | 13 | 25 | 40.814 | S | 0.500 | 1.498  |
| SMM  | 2006 | 272 | 13 | 26 | 15.314 | S | 0.500 | 2.044  |
| SNA7 | 2006 | 272 | 13 | 26 | 21.527 | S | 0.500 | -0.228 |
| P05C | 2006 | 272 | 13 | 26 | 28.432 | S | 0.500 | -0.894 |
| ARV  | 2006 | 272 | 13 | 26 | 1.876  | S | 0.500 | 1.476  |
| RRX  | 2006 | 272 | 13 | 25 | 41.786 | S | 0.500 | 1.523  |
| K09A | 2006 | 272 | 13 | 26 | 11.486 | S | 0.500 | -0.502 |
| SNF6 | 2006 | 272 | 13 | 26 | 32.745 | S | 0.500 | -2.380 |
| PACP | 2006 | 272 | 13 | 26 | 30.404 | S | 0.500 | -0.026 |
| MCCM | 2006 | 272 | 13 | 26 | 49.415 | S | 0.500 | 0.745  |
| MPM  | 2006 | 272 | 13 | 25 | 50.882 | S | 0.500 | 1.958  |
| MWC  | 2006 | 272 | 13 | 25 | 50.651 | S | 0.500 | 0.324  |
| L04A | 2006 | 272 | 13 | 26 | 48.865 | S | 0.500 | -0.346 |
| VCS  | 2006 | 272 | 13 | 25 | 51.520 | S | 0.500 | 0.151  |
| LRL  | 2006 | 272 | 13 | 25 | 51.101 | S | 0.500 | 1.756  |
| TPH  | 2006 | 272 | 13 | 25 | 52.001 | S | 0.500 | 0.002  |
| SN64 | 2006 | 272 | 13 | 26 | 16.880 | S | 0.500 | 0.727  |
| ISA  | 2006 | 272 | 13 | 26 | 0.238  | S | 0.500 | 2.088  |
| SND5 | 2006 | 272 | 13 | 26 | 30.470 | S | 0.500 | -1.514 |
| GSC  | 2006 | 272 | 13 | 25 | 41.006 | S | 0.500 | 1.508  |
| SNA4 | 2006 | 272 | 13 | 26 | 26.479 | S | 0.500 | 0.131  |
| SNC5 | 2006 | 272 | 13 | 26 | 28.693 | S | 0.500 | -1.264 |
| SNG5 | 2006 | 272 | 13 | 26 | 37.117 | S | 0.500 | -1.928 |
| SNC6 | 2006 | 272 | 13 | 26 | 26.522 | S | 0.500 | -0.862 |
| SNE5 | 2006 | 272 | 13 | 26 | 33.019 | S | 0.500 | -1.733 |
| R05C | 2006 | 272 | 13 | 26 | 22.490 | S | 0.500 | -0.225 |
| SNB6 | 2006 | 272 | 13 | 26 | 24.401 | S | 0.500 | -0.527 |
| R06C | 2006 | 272 | 13 | 26 | 16.884 | S | 0.500 | 1.120  |
| SND4 | 2006 | 272 | 13 | 26 | 32.362 | S | 0.500 | -1.460 |
| HEC  | 2006 | 272 | 13 | 25 | 34.449 | S | 0.500 | 1.471  |
| SNB5 | 2006 | 272 | 13 | 26 | 26.937 | S | 0.500 | -0.445 |
| SNE4 | 2006 | 272 | 13 | 26 | 34.496 | S | 0.500 | -1.567 |
| S08C | 2006 | 272 | 13 | 26 | 1.644  | S | 0.500 | 1.278  |
| ORV  | 2006 | 272 | 13 | 26 | 36.943 | S | 0.500 | -1.268 |
| HELL | 2006 | 272 | 13 | 26 | 6.516  | S | 0.500 | 0.075  |

|      |     |    |    |         |           |           |         |
|------|-----|----|----|---------|-----------|-----------|---------|
| 2006 | 293 | 10 | 48 | 59.3798 | -13.45700 | -76.67700 | 23.0000 |
|------|-----|----|----|---------|-----------|-----------|---------|

27

3.370

|      |      |     |    |   |        |   |       |        |
|------|------|-----|----|---|--------|---|-------|--------|
| L04A | 2006 | 293 | 11 | 9 | 8.958  | S | 0.500 | -1.030 |
| HUMO | 2006 | 293 | 11 | 9 | 16.959 | S | 0.500 | -3.049 |
| DGR  | 2006 | 293 | 11 | 7 | 25.411 | S | 0.500 | 1.514  |
| FMP  | 2006 | 293 | 11 | 7 | 35.259 | S | 0.500 | 0.979  |
| SN43 | 2006 | 293 | 11 | 8 | 13.720 | S | 0.500 | -1.206 |
| BAK  | 2006 | 293 | 11 | 7 | 54.722 | S | 0.500 | 0.368  |
| SDD  | 2006 | 293 | 11 | 7 | 29.231 | S | 0.500 | 1.317  |
| HATC | 2006 | 293 | 11 | 8 | 55.217 | S | 0.500 | -0.987 |

|      |      |     |    |   |        |   |       |        |
|------|------|-----|----|---|--------|---|-------|--------|
| SNCC | 2006 | 293 | 11 | 7 | 40.746 | S | 0.500 | 0.885  |
| J08A | 2006 | 293 | 11 | 8 | 58.504 | S | 0.500 | 0.389  |
| J03A | 2006 | 293 | 11 | 9 | 23.048 | S | 0.500 | -2.819 |
| I09A | 2006 | 293 | 11 | 8 | 58.473 | S | 0.500 | -0.417 |
| LGU  | 2006 | 293 | 11 | 7 | 43.757 | S | 0.500 | 0.204  |
| JCS  | 2006 | 293 | 11 | 7 | 16.667 | S | 0.500 | 0.979  |
| J02A | 2006 | 293 | 11 | 9 | 28.895 | S | 0.500 | -0.653 |
| K08A | 2006 | 293 | 11 | 8 | 52.623 | S | 0.500 | -0.359 |
| O02C | 2006 | 293 | 11 | 8 | 57.993 | S | 0.500 | -2.114 |
| K05A | 2006 | 293 | 11 | 9 | 8.690  | S | 0.500 | 0.503  |
| SBC  | 2006 | 293 | 11 | 7 | 51.557 | S | 0.500 | 0.279  |
| PIN  | 2006 | 293 | 11 | 9 | 17.276 | S | 0.500 | 0.535  |
| RPV  | 2006 | 293 | 11 | 7 | 36.479 | S | 0.500 | 1.194  |
| V05C | 2006 | 293 | 11 | 8 | 5.126  | S | 0.500 | 0.369  |
| M08A | 2006 | 293 | 11 | 8 | 39.674 | S | 0.500 | -1.483 |
| L05A | 2006 | 293 | 11 | 9 | 2.539  | S | 0.500 | 0.387  |
| HOPS | 2006 | 293 | 11 | 8 | 54.991 | S | 0.500 | 2.316  |
| O09A | 2006 | 293 | 11 | 8 | 21.069 | S | 0.500 | -1.519 |
| N09A | 2006 | 293 | 11 | 8 | 29.510 | S | 0.500 | -1.151 |
| MUR  | 2006 | 293 | 11 | 7 | 26.101 | S | 0.500 | 1.278  |
| I03A | 2006 | 293 | 11 | 9 | 30.148 | S | 0.500 | -2.295 |
| DBO  | 2006 | 293 | 11 | 9 | 22.806 | S | 0.500 | -2.950 |
| P07A | 2006 | 293 | 11 | 8 | 28.346 | S | 0.500 | 0.047  |
| M02C | 2006 | 293 | 11 | 9 | 6.926  | S | 0.500 | -3.186 |
| P01C | 2006 | 293 | 11 | 8 | 59.137 | S | 0.500 | 0.622  |
| Q09A | 2006 | 293 | 11 | 8 | 10.540 | S | 0.500 | -0.339 |
| PLM  | 2006 | 293 | 11 | 7 | 21.460 | S | 0.500 | 1.128  |
| RCT  | 2006 | 293 | 11 | 8 | 1.637  | S | 0.500 | -1.769 |
| OSI  | 2006 | 293 | 11 | 7 | 45.138 | S | 0.500 | -0.170 |
| M09A | 2006 | 293 | 11 | 8 | 33.678 | S | 0.500 | -1.390 |
| M07A | 2006 | 293 | 11 | 8 | 45.069 | S | 0.500 | -0.827 |
| MLAC | 2006 | 293 | 11 | 8 | 12.806 | S | 0.500 | 0.800  |
| BBR  | 2006 | 293 | 11 | 7 | 30.063 | S | 0.500 | 1.302  |
| ELFS | 2006 | 293 | 11 | 8 | 49.386 | S | 0.500 | -0.508 |
| M04C | 2006 | 293 | 11 | 9 | 5.647  | S | 0.500 | -0.869 |
| L09A | 2006 | 293 | 11 | 8 | 39.932 | S | 0.500 | -1.787 |
| GASB | 2006 | 293 | 11 | 8 | 56.410 | S | 0.500 | 0.798  |
| CIA  | 2006 | 293 | 11 | 7 | 33.332 | S | 0.500 | 0.855  |
| L02A | 2006 | 293 | 11 | 9 | 19.404 | S | 0.500 | -1.335 |
| VES  | 2006 | 293 | 11 | 7 | 58.234 | S | 0.500 | -0.076 |
| K09A | 2006 | 293 | 11 | 8 | 46.700 | S | 0.500 | -1.077 |
| SND4 | 2006 | 293 | 11 | 8 | 40.164 | S | 0.500 | 0.448  |
| V03C | 2006 | 293 | 11 | 8 | 16.304 | S | 0.500 | 0.353  |
| MCCM | 2006 | 293 | 11 | 8 | 44.962 | S | 0.500 | 0.234  |
| SNG5 | 2006 | 293 | 11 | 8 | 47.084 | S | 0.500 | -0.798 |
| J09A | 2006 | 293 | 11 | 8 | 53.136 | S | 0.500 | -0.467 |
| DEC  | 2006 | 293 | 11 | 7 | 39.172 | S | 0.500 | -0.010 |
| SN63 | 2006 | 293 | 11 | 8 | 19.162 | S | 0.500 | -0.613 |
| M06C | 2006 | 293 | 11 | 8 | 52.642 | S | 0.500 | -0.100 |
| SVD  | 2006 | 293 | 11 | 7 | 29.877 | S | 0.500 | 1.464  |
| P10A | 2006 | 293 | 11 | 8 | 12.413 | S | 0.500 | -0.567 |
| MPP  | 2006 | 293 | 11 | 7 | 56.200 | S | 0.500 | 0.049  |
| USC  | 2006 | 293 | 11 | 7 | 38.441 | S | 0.500 | 1.605  |
| TOV  | 2006 | 293 | 11 | 7 | 42.071 | S | 0.500 | 0.016  |
| CVS  | 2006 | 293 | 11 | 8 | 43.960 | S | 0.500 | 0.586  |
| YBH  | 2006 | 293 | 11 | 9 | 8.787  | S | 0.500 | -2.971 |
| ADO  | 2006 | 293 | 11 | 7 | 34.874 | S | 0.500 | -0.077 |
| SND5 | 2006 | 293 | 11 | 8 | 39.836 | S | 0.500 | 0.482  |
| SNE6 | 2006 | 293 | 11 | 8 | 41.116 | S | 0.500 | -0.210 |
| L07A | 2006 | 293 | 11 | 8 | 52.203 | S | 0.500 | -0.056 |
| I08A | 2006 | 293 | 11 | 9 | 2.977  | S | 0.500 | -0.297 |
| TPH  | 2006 | 293 | 11 | 8 | 3.874  | S | 0.500 | -0.530 |
| SLA  | 2006 | 293 | 11 | 7 | 46.347 | S | 0.500 | 0.735  |



|      |      |     |    |   |        |   |       |        |
|------|------|-----|----|---|--------|---|-------|--------|
| U10A | 2006 | 293 | 11 | 7 | 44.046 | S | 0.500 | 0.696  |
| I06A | 2006 | 293 | 11 | 9 | 14.289 | S | 0.500 | 0.691  |
| WVOR | 2006 | 293 | 11 | 8 | 50.467 | S | 0.500 | -0.845 |
| J05A | 2006 | 293 | 11 | 9 | 15.499 | S | 0.500 | 0.767  |
| SN34 | 2006 | 293 | 11 | 8 | 10.976 | S | 0.500 | -0.677 |
| V04C | 2006 | 293 | 11 | 8 | 10.374 | S | 0.500 | 0.167  |
| J07A | 2006 | 293 | 11 | 9 | 4.249  | S | 0.500 | 0.942  |
| SNG7 | 2006 | 293 | 11 | 8 | 47.423 | S | 0.500 | -1.157 |
| BEK  | 2006 | 293 | 11 | 8 | 41.344 | S | 0.500 | 0.191  |
| K07A | 2006 | 293 | 11 | 8 | 57.777 | S | 0.500 | 0.450  |
| SNF6 | 2006 | 293 | 11 | 8 | 44.003 | S | 0.500 | -0.752 |
| SNB7 | 2006 | 293 | 11 | 8 | 34.057 | S | 0.500 | 0.809  |
| N08A | 2006 | 293 | 11 | 8 | 33.009 | S | 0.500 | -1.056 |
| EDW2 | 2006 | 293 | 11 | 7 | 41.369 | S | 0.500 | -0.759 |
| P06A | 2006 | 293 | 11 | 8 | 37.067 | S | 0.500 | 0.545  |
| SNE4 | 2006 | 293 | 11 | 8 | 42.802 | S | 0.500 | 0.221  |
| LRL  | 2006 | 293 | 11 | 7 | 45.659 | S | 0.500 | 0.657  |
| SHO  | 2006 | 293 | 11 | 7 | 38.633 | S | 0.500 | 0.506  |
| M10A | 2006 | 293 | 11 | 8 | 29.613 | S | 0.500 | -0.770 |
| SUTB | 2006 | 293 | 11 | 8 | 45.591 | S | 0.500 | 0.045  |
| ARV  | 2006 | 293 | 11 | 7 | 50.165 | S | 0.500 | -0.081 |
| LAVA | 2006 | 293 | 11 | 8 | 34.919 | S | 0.500 | 0.339  |
| SNE5 | 2006 | 293 | 11 | 8 | 42.473 | S | 0.500 | -0.122 |
| L08A | 2006 | 293 | 11 | 8 | 45.519 | S | 0.500 | -1.882 |
| K06A | 2006 | 293 | 11 | 9 | 5.116  | S | 0.500 | 0.628  |
| ORV  | 2006 | 293 | 11 | 8 | 46.177 | S | 0.500 | 0.169  |
| SNF8 | 2006 | 293 | 11 | 8 | 43.885 | S | 0.500 | -0.576 |
| VTV  | 2006 | 293 | 11 | 7 | 33.979 | S | 0.500 | -0.375 |
| BFS  | 2006 | 293 | 11 | 7 | 34.445 | S | 0.500 | 0.297  |
| SCZ2 | 2006 | 293 | 11 | 7 | 46.868 | S | 0.500 | -0.173 |
| Q08A | 2006 | 293 | 11 | 8 | 15.839 | S | 0.500 | -0.174 |
| O08A | 2006 | 293 | 11 | 8 | 28.460 | S | 0.500 | -1.677 |
| TIN  | 2006 | 293 | 11 | 8 | 3.313  | S | 0.500 | 0.803  |
| O03C | 2006 | 293 | 11 | 8 | 51.310 | S | 0.500 | -2.028 |
| SN74 | 2006 | 293 | 11 | 8 | 22.490 | S | 0.500 | -0.265 |
| R08A | 2006 | 293 | 11 | 8 | 13.445 | S | 0.500 | 0.471  |
| MOD  | 2006 | 293 | 11 | 8 | 57.408 | S | 0.500 | 0.013  |
| SNC5 | 2006 | 293 | 11 | 8 | 37.647 | S | 0.500 | 0.656  |
| GSC  | 2006 | 293 | 11 | 7 | 37.641 | S | 0.500 | 0.670  |
| DJJ  | 2006 | 293 | 11 | 7 | 39.785 | S | 0.500 | 0.828  |
| SNC6 | 2006 | 293 | 11 | 8 | 36.259 | S | 0.500 | 0.631  |
| HELL | 2006 | 293 | 11 | 8 | 3.954  | S | 0.500 | -1.126 |
| CHF  | 2006 | 293 | 11 | 7 | 37.913 | S | 0.500 | 0.250  |
| N07B | 2006 | 293 | 11 | 8 | 38.224 | S | 0.500 | -1.200 |
| S05C | 2006 | 293 | 11 | 8 | 18.624 | S | 0.500 | -1.287 |
| Q04C | 2006 | 293 | 11 | 8 | 40.003 | S | 0.500 | 0.416  |
| RRX  | 2006 | 293 | 11 | 7 | 34.817 | S | 0.500 | 0.251  |
| O04C | 2006 | 293 | 11 | 8 | 48.848 | S | 0.500 | -0.886 |
| R07C | 2006 | 293 | 11 | 8 | 18.791 | S | 0.500 | 1.475  |
| Q07A | 2006 | 293 | 11 | 8 | 23.268 | S | 0.500 | 0.503  |
| MWC  | 2006 | 293 | 11 | 7 | 37.359 | S | 0.500 | 0.331  |
| M05C | 2006 | 293 | 11 | 8 | 57.822 | S | 0.500 | -0.622 |
| SN55 | 2006 | 293 | 11 | 8 | 18.424 | S | 0.500 | 0.534  |
| O10A | 2006 | 293 | 11 | 8 | 17.845 | S | 0.500 | -1.408 |
| HEC  | 2006 | 293 | 11 | 7 | 29.798 | S | 0.500 | 0.555  |
| SMM  | 2006 | 293 | 11 | 8 | 1.326  | S | 0.500 | 0.470  |
| BDM  | 2006 | 293 | 11 | 8 | 37.611 | S | 0.500 | 1.563  |
| S06C | 2006 | 293 | 11 | 8 | 20.738 | S | 0.500 | -0.492 |
| O01C | 2006 | 293 | 11 | 9 | 7.134  | S | 0.500 | 0.197  |
| PKD  | 2006 | 293 | 11 | 8 | 9.990  | S | 0.500 | -0.207 |
| SNB6 | 2006 | 293 | 11 | 8 | 33.480 | S | 0.500 | 0.832  |
| P09A | 2006 | 293 | 11 | 8 | 15.641 | S | 0.500 | -1.273 |
| SN97 | 2006 | 293 | 11 | 8 | 30.281 | S | 0.500 | 1.461  |

|      |      |     |    |   |        |   |       |        |
|------|------|-----|----|---|--------|---|-------|--------|
| FUR  | 2006 | 293 | 11 | 7 | 48.120 | S | 0.500 | 0.744  |
| U04C | 2006 | 293 | 11 | 8 | 15.605 | S | 0.500 | 0.320  |
| SN64 | 2006 | 293 | 11 | 8 | 19.722 | S | 0.500 | -0.170 |
| SNC7 | 2006 | 293 | 11 | 8 | 37.535 | S | 0.500 | 0.421  |
| MNRC | 2006 | 293 | 11 | 8 | 48.904 | S | 0.500 | 1.492  |
| O07A | 2006 | 293 | 11 | 8 | 32.705 | S | 0.500 | -0.853 |
| N02C | 2006 | 293 | 11 | 9 | 6.722  | S | 0.500 | -2.043 |
| T06C | 2006 | 293 | 11 | 8 | 9.675  | S | 0.500 | -2.954 |
| SN14 | 2006 | 293 | 11 | 8 | 7.429  | S | 0.500 | -0.382 |
| FARB | 2006 | 293 | 11 | 8 | 42.203 | S | 0.500 | -0.097 |
| O05C | 2006 | 293 | 11 | 8 | 45.151 | S | 0.500 | -0.436 |
| HAST | 2006 | 293 | 11 | 8 | 21.674 | S | 0.500 | 0.334  |
| SAO  | 2006 | 293 | 11 | 8 | 23.864 | S | 0.500 | 0.355  |
| CWC  | 2006 | 293 | 11 | 7 | 57.672 | S | 0.500 | 1.342  |
| MPM  | 2006 | 293 | 11 | 7 | 49.911 | S | 0.500 | 1.076  |
| SND7 | 2006 | 293 | 11 | 8 | 40.921 | S | 0.500 | 0.069  |
| R04C | 2006 | 293 | 11 | 8 | 32.333 | S | 0.500 | 0.665  |
| N06A | 2006 | 293 | 11 | 8 | 44.558 | S | 0.500 | -0.176 |
| SNA8 | 2006 | 293 | 11 | 8 | 31.234 | S | 0.500 | 1.429  |
| ISA  | 2006 | 293 | 11 | 7 | 53.595 | S | 0.500 | 1.112  |
| SN85 | 2006 | 293 | 11 | 8 | 26.005 | S | 0.500 | 0.482  |
| SNA3 | 2006 | 293 | 11 | 8 | 31.752 | S | 0.500 | 0.415  |
| SNC8 | 2006 | 293 | 11 | 8 | 36.820 | S | 0.500 | 0.784  |
| S09A | 2006 | 293 | 11 | 8 | 1.595  | S | 0.500 | 0.309  |
| S08C | 2006 | 293 | 11 | 8 | 7.293  | S | 0.500 | 0.866  |
| VCS  | 2006 | 293 | 11 | 7 | 39.463 | S | 0.500 | -0.260 |
| SNA4 | 2006 | 293 | 11 | 8 | 31.510 | S | 0.500 | 0.349  |
| SN93 | 2006 | 293 | 11 | 8 | 28.831 | S | 0.500 | 0.312  |
| JRSC | 2006 | 293 | 11 | 8 | 34.886 | S | 0.500 | 0.660  |
| SN87 | 2006 | 293 | 11 | 8 | 28.270 | S | 0.500 | 1.581  |
| SN96 | 2006 | 293 | 11 | 8 | 28.441 | S | 0.500 | 0.738  |
| SND8 | 2006 | 293 | 11 | 8 | 38.942 | S | 0.500 | 0.389  |
| SNA7 | 2006 | 293 | 11 | 8 | 32.606 | S | 0.500 | 1.407  |
| S04C | 2006 | 293 | 11 | 8 | 29.628 | S | 0.500 | 1.206  |
| SN84 | 2006 | 293 | 11 | 8 | 25.575 | S | 0.500 | -0.130 |
| J06A | 2006 | 293 | 11 | 9 | 8.036  | S | 0.500 | 0.567  |
| O06A | 2006 | 293 | 11 | 8 | 39.847 | S | 0.500 | -0.187 |
| SNB3 | 2006 | 293 | 11 | 8 | 35.052 | S | 0.500 | 0.439  |
| PACP | 2006 | 293 | 11 | 8 | 24.515 | S | 0.500 | 0.176  |
| R06C | 2006 | 293 | 11 | 8 | 25.771 | S | 0.500 | 1.883  |
| WCN  | 2006 | 293 | 11 | 8 | 33.849 | S | 0.500 | 1.305  |
| CMB  | 2006 | 293 | 11 | 8 | 26.115 | S | 0.500 | -0.150 |
| R05C | 2006 | 293 | 11 | 8 | 30.765 | S | 0.500 | 0.730  |
| GRA  | 2006 | 293 | 11 | 7 | 56.722 | S | 0.500 | 0.858  |
| SNB9 | 2006 | 293 | 11 | 8 | 32.820 | S | 0.500 | 0.802  |
| SN95 | 2006 | 293 | 11 | 8 | 28.137 | S | 0.500 | 0.098  |

2006 337 20 52 20.5228 13.99400 -91.20700 61.2000

28

4.613

|      |      |     |    |   |        |   |       |        |
|------|------|-----|----|---|--------|---|-------|--------|
| R05C | 2006 | 337 | 21 | 4 | 43.076 | S | 0.500 | 0.727  |
| ARV  | 2006 | 337 | 21 | 3 | 57.049 | S | 0.500 | -0.744 |
| GRA  | 2006 | 337 | 21 | 4 | 0.135  | S | 0.500 | 0.397  |
| SMM  | 2006 | 337 | 21 | 4 | 12.308 | S | 0.500 | 0.377  |
| SLA  | 2006 | 337 | 21 | 3 | 48.964 | S | 0.500 | 0.292  |
| SNG7 | 2006 | 337 | 21 | 5 | 4.432  | S | 0.500 | -0.639 |
| MOD  | 2006 | 337 | 21 | 5 | 12.350 | S | 0.500 | -1.401 |
| SN84 | 2006 | 337 | 21 | 4 | 37.517 | S | 0.500 | -0.460 |
| BFS  | 2006 | 337 | 21 | 3 | 38.435 | S | 0.500 | 0.424  |
| SND4 | 2006 | 337 | 21 | 4 | 54.726 | S | 0.500 | -0.629 |
| O09A | 2006 | 337 | 21 | 4 | 28.445 | S | 0.500 | -0.893 |
| SNA8 | 2006 | 337 | 21 | 4 | 42.254 | S | 0.500 | 1.028  |
| MWC  | 2006 | 337 | 21 | 3 | 41.948 | S | 0.500 | -0.229 |
| HELL | 2006 | 337 | 21 | 4 | 12.985 | S | 0.500 | -0.453 |
| SHO  | 2006 | 337 | 21 | 3 | 38.116 | S | 0.500 | -0.220 |

|      |      |     |    |   |        |   |       |        |
|------|------|-----|----|---|--------|---|-------|--------|
| SND5 | 2006 | 337 | 21 | 4 | 53.812 | S | 0.500 | -0.688 |
| OSI  | 2006 | 337 | 21 | 3 | 52.114 | S | 0.500 | -0.346 |
| BEK  | 2006 | 337 | 21 | 4 | 55.330 | S | 0.500 | 0.013  |
| DEC  | 2006 | 337 | 21 | 3 | 45.023 | S | 0.500 | -0.180 |
| Q08A | 2006 | 337 | 21 | 4 | 23.046 | S | 0.500 | 0.031  |
| R08A | 2006 | 337 | 21 | 4 | 20.652 | S | 0.500 | 0.883  |
| SN64 | 2006 | 337 | 21 | 4 | 30.305 | S | 0.500 | -0.282 |
| R04C | 2006 | 337 | 21 | 4 | 46.382 | S | 0.500 | 0.138  |
| SNE6 | 2006 | 337 | 21 | 4 | 55.882 | S | 0.500 | -0.489 |
| SN87 | 2006 | 337 | 21 | 4 | 39.070 | S | 0.500 | 1.308  |
| SNE5 | 2006 | 337 | 21 | 4 | 57.710 | S | 0.500 | -0.718 |
| BNLO | 2006 | 337 | 21 | 4 | 49.475 | S | 0.500 | -0.161 |
| M06C | 2006 | 337 | 21 | 5 | 8.258  | S | 0.500 | -0.372 |
| SNF6 | 2006 | 337 | 21 | 4 | 59.833 | S | 0.500 | -0.752 |
| CMB  | 2006 | 337 | 21 | 4 | 38.155 | S | 0.500 | -0.883 |
| SNC5 | 2006 | 337 | 21 | 4 | 51.172 | S | 0.500 | -0.281 |
| O06A | 2006 | 337 | 21 | 4 | 52.735 | S | 0.500 | -0.389 |
| SNC6 | 2006 | 337 | 21 | 4 | 49.357 | S | 0.500 | -0.039 |
| SN93 | 2006 | 337 | 21 | 4 | 41.645 | S | 0.500 | -0.471 |
| LRL  | 2006 | 337 | 21 | 3 | 49.090 | S | 0.500 | -0.026 |
| CWC  | 2006 | 337 | 21 | 4 | 3.152  | S | 0.500 | 1.288  |
| SN34 | 2006 | 337 | 21 | 4 | 20.110 | S | 0.500 | -0.326 |
| R06C | 2006 | 337 | 21 | 4 | 36.720 | S | 0.500 | 2.257  |
| DJJ  | 2006 | 337 | 21 | 3 | 45.796 | S | 0.500 | 0.525  |
| SN95 | 2006 | 337 | 21 | 4 | 40.480 | S | 0.500 | -0.132 |
| SND8 | 2006 | 337 | 21 | 4 | 52.328 | S | 0.500 | 0.272  |
| N06A | 2006 | 337 | 21 | 4 | 57.772 | S | 0.500 | -0.733 |
| SNG5 | 2006 | 337 | 21 | 5 | 4.299  | S | 0.500 | -0.527 |
| SNE4 | 2006 | 337 | 21 | 4 | 57.980 | S | 0.500 | -0.759 |
| HEC  | 2006 | 337 | 21 | 3 | 28.702 | S | 0.500 | -0.392 |
| SN75 | 2006 | 337 | 21 | 4 | 33.710 | S | 0.500 | 0.175  |
| SN14 | 2006 | 337 | 21 | 4 | 16.217 | S | 0.500 | 0.673  |
| WCN  | 2006 | 337 | 21 | 4 | 45.568 | S | 0.500 | 1.030  |
| SNA7 | 2006 | 337 | 21 | 4 | 44.072 | S | 0.500 | 0.792  |
| SN96 | 2006 | 337 | 21 | 4 | 40.851 | S | 0.500 | 0.951  |
| PHL  | 2006 | 337 | 21 | 4 | 18.645 | S | 0.500 | 0.139  |
| N09A | 2006 | 337 | 21 | 4 | 38.279 | S | 0.500 | -0.931 |
| SN97 | 2006 | 337 | 21 | 4 | 42.000 | S | 0.500 | 1.422  |
| SND7 | 2006 | 337 | 21 | 4 | 54.948 | S | 0.500 | -0.313 |
| SNB3 | 2006 | 337 | 21 | 4 | 49.373 | S | 0.500 | -0.039 |
| SNB9 | 2006 | 337 | 21 | 4 | 44.301 | S | 0.500 | 0.712  |
| SNC7 | 2006 | 337 | 21 | 4 | 50.857 | S | 0.500 | 0.109  |
| SNC8 | 2006 | 337 | 21 | 4 | 49.718 | S | 0.500 | 0.720  |
| SNA4 | 2006 | 337 | 21 | 4 | 44.636 | S | 0.500 | 0.003  |
| SNA3 | 2006 | 337 | 21 | 4 | 44.786 | S | 0.500 | -0.402 |
| SN85 | 2006 | 337 | 21 | 4 | 37.699 | S | 0.500 | 0.386  |
| ORV  | 2006 | 337 | 21 | 5 | 2.998  | S | 0.500 | 0.074  |
| EDW2 | 2006 | 337 | 21 | 3 | 46.187 | S | 0.500 | -0.845 |

|      |      |     |    |         |          |           |         |        |  |
|------|------|-----|----|---------|----------|-----------|---------|--------|--|
| 2006 | 259  | 9   | 45 | 30.3001 | -3.08000 | 129.44099 | 17.0000 |        |  |
| J08A | 2006 | 259 | 10 | 10      | 30.447   | S         | 0.500   | 1.245  |  |
| P08A | 2006 | 259 | 10 | 10      | 34.965   | S         | 0.500   | 1.002  |  |
| P09A | 2006 | 259 | 10 | 10      | 36.141   | S         | 0.500   | -0.945 |  |
| DJJ  | 2006 | 259 | 10 | 10      | 37.546   | S         | 0.500   | 0.732  |  |
| K05A | 2006 | 259 | 10 | 10      | 22.593   | S         | 0.500   | 0.201  |  |
| DBO  | 2006 | 259 | 10 | 10      | 14.020   | S         | 0.500   | -0.949 |  |
| J05A | 2006 | 259 | 10 | 10      | 20.729   | S         | 0.500   | -0.020 |  |
| L05A | 2006 | 259 | 10 | 10      | 23.365   | S         | 0.500   | 0.026  |  |
| Q07A | 2006 | 259 | 10 | 10      | 33.059   | S         | 0.500   | 0.934  |  |
| U04C | 2006 | 259 | 10 | 10      | 26.715   | S         | 0.500   | -0.799 |  |
| R08A | 2006 | 259 | 10 | 10      | 36.615   | S         | 0.500   | 1.708  |  |
| O01C | 2006 | 259 | 10 | 10      | 13.897   | S         | 0.500   | -1.015 |  |
| PKD  | 2006 | 259 | 10 | 10      | 27.636   | S         | 0.500   | -0.906 |  |

|      |      |     |    |    |        |   |       |        |
|------|------|-----|----|----|--------|---|-------|--------|
| BFS  | 2006 | 259 | 10 | 10 | 39.913 | S | 0.500 | 0.191  |
| TIN  | 2006 | 259 | 10 | 10 | 37.204 | S | 0.500 | 1.411  |
| L09A | 2006 | 259 | 10 | 10 | 32.811 | S | 0.500 | -0.241 |
| L02A | 2006 | 259 | 10 | 10 | 13.914 | S | 0.500 | -0.576 |
| O09A | 2006 | 259 | 10 | 10 | 35.955 | S | 0.500 | -0.090 |
| MOD  | 2006 | 259 | 10 | 10 | 25.778 | S | 0.500 | 0.747  |
| SNF6 | 2006 | 259 | 10 | 10 | 22.456 | S | 0.500 | -1.741 |
| ISA  | 2006 | 259 | 10 | 10 | 35.761 | S | 0.500 | 0.006  |
| K07A | 2006 | 259 | 10 | 10 | 28.474 | S | 0.500 | 0.967  |
| SNE7 | 2006 | 259 | 10 | 10 | 24.002 | S | 0.500 | -1.296 |
| Q04C | 2006 | 259 | 10 | 10 | 23.149 | S | 0.500 | -0.247 |
| MNRC | 2006 | 259 | 10 | 10 | 19.169 | S | 0.500 | -1.062 |
| SHO  | 2006 | 259 | 10 | 10 | 45.030 | S | 0.500 | 2.245  |
| SAO  | 2006 | 259 | 10 | 10 | 23.264 | S | 0.500 | -1.617 |
| DGR  | 2006 | 259 | 10 | 10 | 44.217 | S | 0.500 | 2.094  |
| M02C | 2006 | 259 | 10 | 10 | 16.912 | S | 0.500 | 0.085  |
| I08A | 2006 | 259 | 10 | 10 | 28.864 | S | 0.500 | 0.333  |
| SNG7 | 2006 | 259 | 10 | 10 | 21.853 | S | 0.500 | -2.018 |
| N07B | 2006 | 259 | 10 | 10 | 29.932 | S | 0.500 | -0.189 |
| O07A | 2006 | 259 | 10 | 10 | 30.677 | S | 0.500 | -0.306 |
| K09A | 2006 | 259 | 10 | 10 | 33.062 | S | 0.500 | 0.817  |
| SN55 | 2006 | 259 | 10 | 10 | 33.528 | S | 0.500 | 1.720  |
| S04C | 2006 | 259 | 10 | 10 | 23.542 | S | 0.500 | -1.357 |
| YBH  | 2006 | 259 | 10 | 10 | 16.380 | S | 0.500 | -0.701 |
| SUTB | 2006 | 259 | 10 | 10 | 20.136 | S | 0.500 | -1.833 |
| MLAC | 2006 | 259 | 10 | 10 | 36.506 | S | 0.500 | 2.984  |
| ORV  | 2006 | 259 | 10 | 10 | 20.747 | S | 0.500 | -2.140 |
| L08A | 2006 | 259 | 10 | 10 | 31.126 | S | 0.500 | 0.371  |
| SN43 | 2006 | 259 | 10 | 10 | 32.247 | S | 0.500 | 0.632  |
| J03A | 2006 | 259 | 10 | 10 | 14.831 | S | 0.500 | -0.505 |
| Q08A | 2006 | 259 | 10 | 10 | 36.227 | S | 0.500 | 0.894  |
| GASB | 2006 | 259 | 10 | 10 | 18.341 | S | 0.500 | -0.437 |
| R06C | 2006 | 259 | 10 | 10 | 32.370 | S | 0.500 | 1.780  |
| L07A | 2006 | 259 | 10 | 10 | 28.856 | S | 0.500 | 0.777  |
| S05C | 2006 | 259 | 10 | 10 | 28.232 | S | 0.500 | -0.010 |
| SND8 | 2006 | 259 | 10 | 10 | 26.426 | S | 0.500 | -0.646 |
| S08C | 2006 | 259 | 10 | 10 | 38.327 | S | 0.500 | 2.369  |
| SNF8 | 2006 | 259 | 10 | 10 | 24.373 | S | 0.500 | -1.307 |
| M05C | 2006 | 259 | 10 | 10 | 22.286 | S | 0.500 | -0.546 |
| M06C | 2006 | 259 | 10 | 10 | 25.119 | S | 0.500 | 0.107  |
| R07C | 2006 | 259 | 10 | 10 | 34.343 | S | 0.500 | 1.767  |
| SN85 | 2006 | 259 | 10 | 10 | 30.056 | S | 0.500 | 0.833  |
| SN87 | 2006 | 259 | 10 | 10 | 31.116 | S | 0.500 | 0.926  |
| SNE6 | 2006 | 259 | 10 | 10 | 23.625 | S | 0.500 | -1.708 |
| SN95 | 2006 | 259 | 10 | 10 | 28.134 | S | 0.500 | 0.065  |
| SNE5 | 2006 | 259 | 10 | 10 | 22.301 | S | 0.500 | -1.884 |
| HELL | 2006 | 259 | 10 | 10 | 33.300 | S | 0.500 | -0.067 |
| SNB7 | 2006 | 259 | 10 | 10 | 28.038 | S | 0.500 | 0.017  |
| R04C | 2006 | 259 | 10 | 10 | 24.663 | S | 0.500 | -0.712 |
| I09A | 2006 | 259 | 10 | 10 | 30.825 | S | 0.500 | 0.030  |
| O06A | 2006 | 259 | 10 | 10 | 27.086 | S | 0.500 | -0.841 |
| J09A | 2006 | 259 | 10 | 10 | 32.674 | S | 0.500 | 1.105  |
| S06C | 2006 | 259 | 10 | 10 | 30.224 | S | 0.500 | 0.390  |
| SN97 | 2006 | 259 | 10 | 10 | 29.977 | S | 0.500 | 0.750  |
| SND4 | 2006 | 259 | 10 | 10 | 23.642 | S | 0.500 | -0.635 |
| SNB9 | 2006 | 259 | 10 | 10 | 30.173 | S | 0.500 | 0.747  |
| SN96 | 2006 | 259 | 10 | 10 | 29.368 | S | 0.500 | 0.390  |
| SNC8 | 2006 | 259 | 10 | 10 | 27.620 | S | 0.500 | -0.678 |
| SN75 | 2006 | 259 | 10 | 10 | 31.032 | S | 0.500 | 0.499  |
| BEK  | 2006 | 259 | 10 | 10 | 25.309 | S | 0.500 | -1.423 |
| SNA3 | 2006 | 259 | 10 | 10 | 26.478 | S | 0.500 | 0.348  |
| SNA8 | 2006 | 259 | 10 | 10 | 30.407 | S | 0.500 | 0.679  |
| WCN  | 2006 | 259 | 10 | 10 | 29.820 | S | 0.500 | 0.896  |

|      |      |     |    |    |        |   |       |        |
|------|------|-----|----|----|--------|---|-------|--------|
| SN34 | 2006 | 259 | 10 | 10 | 34.506 | S | 0.500 | 1.336  |
| SNB5 | 2006 | 259 | 10 | 10 | 26.273 | S | 0.500 | -0.296 |
| SN74 | 2006 | 259 | 10 | 10 | 29.518 | S | 0.500 | 0.060  |
| P05C | 2006 | 259 | 10 | 10 | 25.149 | S | 0.500 | -1.020 |
| N06A | 2006 | 259 | 10 | 10 | 27.667 | S | 0.500 | 0.206  |
| SN64 | 2006 | 259 | 10 | 10 | 31.454 | S | 0.500 | 0.684  |
| LAVA | 2006 | 259 | 10 | 10 | 25.590 | S | 0.500 | -0.316 |
| SNE4 | 2006 | 259 | 10 | 10 | 22.500 | S | 0.500 | -0.706 |
| SNB3 | 2006 | 259 | 10 | 10 | 24.999 | S | 0.500 | -0.199 |
| SNC7 | 2006 | 259 | 10 | 10 | 26.562 | S | 0.500 | -0.463 |
| SN63 | 2006 | 259 | 10 | 10 | 30.288 | S | 0.500 | 0.136  |
| SNA7 | 2006 | 259 | 10 | 10 | 29.424 | S | 0.500 | 0.558  |
| SNB6 | 2006 | 259 | 10 | 10 | 27.759 | S | 0.500 | -0.058 |
| SND5 | 2006 | 259 | 10 | 10 | 23.764 | S | 0.500 | -1.152 |
| SNC6 | 2006 | 259 | 10 | 10 | 26.186 | S | 0.500 | -0.759 |
| R05C | 2006 | 259 | 10 | 10 | 29.027 | S | 0.500 | 0.509  |
| SND7 | 2006 | 259 | 10 | 10 | 24.248 | S | 0.500 | -1.720 |
| SNC5 | 2006 | 259 | 10 | 10 | 24.483 | S | 0.500 | -1.170 |

|      |      |    |    |         |          |           |         |        |       |
|------|------|----|----|---------|----------|-----------|---------|--------|-------|
| 2007 | 55   | 2  | 36 | 25.7674 | -7.00600 | -80.48500 | 23.0000 | 32     | 2.117 |
| SNC7 | 2007 | 55 | 2  | 54      | 31.167   | S         | 0.500   | 0.413  |       |
| TOV  | 2007 | 55 | 2  | 53      | 32.736   | S         | 0.500   | -0.019 |       |
| Q09A | 2007 | 55 | 2  | 54      | 2.186    | S         | 0.500   | -0.360 |       |
| PLM  | 2007 | 55 | 2  | 53      | 10.450   | S         | 0.500   | 0.991  |       |
| JCS  | 2007 | 55 | 2  | 53      | 5.787    | S         | 0.500   | 1.249  |       |
| PIN  | 2007 | 55 | 2  | 55      | 13.154   | S         | 0.500   | 0.272  |       |
| J04A | 2007 | 55 | 2  | 55      | 15.233   | S         | 0.500   | -0.986 |       |
| P10A | 2007 | 55 | 2  | 54      | 4.207    | S         | 0.500   | -0.487 |       |
| BBR  | 2007 | 55 | 2  | 53      | 19.419   | S         | 0.500   | 1.164  |       |
| M08A | 2007 | 55 | 2  | 54      | 33.407   | S         | 0.500   | -1.400 |       |
| T06C | 2007 | 55 | 2  | 54      | 1.037    | S         | 0.500   | -3.869 |       |
| WENL | 2007 | 55 | 2  | 54      | 27.640   | S         | 0.500   | 1.394  |       |
| BDM  | 2007 | 55 | 2  | 54      | 31.565   | S         | 0.500   | 1.533  |       |
| VTV  | 2007 | 55 | 2  | 53      | 24.158   | S         | 0.500   | -0.052 |       |
| JRSC | 2007 | 55 | 2  | 54      | 28.629   | S         | 0.500   | 0.345  |       |
| SVD  | 2007 | 55 | 2  | 53      | 19.739   | S         | 0.500   | 1.779  |       |
| DJJ  | 2007 | 55 | 2  | 53      | 30.489   | S         | 0.500   | 1.134  |       |
| YBH  | 2007 | 55 | 2  | 55      | 4.154    | S         | 0.500   | -3.664 |       |
| DEC  | 2007 | 55 | 2  | 53      | 29.844   | S         | 0.500   | 0.257  |       |
| EDW2 | 2007 | 55 | 2  | 53      | 31.743   | S         | 0.500   | -0.785 |       |
| CVS  | 2007 | 55 | 2  | 54      | 38.326   | S         | 0.500   | 0.466  |       |
| MNRC | 2007 | 55 | 2  | 54      | 43.412   | S         | 0.500   | 1.303  |       |
| RRX  | 2007 | 55 | 2  | 53      | 24.808   | S         | 0.500   | 0.502  |       |
| PASC | 2007 | 55 | 2  | 53      | 27.874   | S         | 0.500   | 0.227  |       |
| VES  | 2007 | 55 | 2  | 53      | 49.759   | S         | 0.500   | 0.014  |       |
| MWC  | 2007 | 55 | 2  | 53      | 27.989   | S         | 0.500   | 0.757  |       |
| SUTB | 2007 | 55 | 2  | 54      | 39.745   | S         | 0.500   | -0.225 |       |
| SN74 | 2007 | 55 | 2  | 54      | 15.234   | S         | 0.500   | -0.335 |       |
| PHL  | 2007 | 55 | 2  | 53      | 58.128   | S         | 0.500   | 0.063  |       |
| GRA  | 2007 | 55 | 2  | 53      | 47.585   | S         | 0.500   | 0.842  |       |
| FUR  | 2007 | 55 | 2  | 53      | 38.704   | S         | 0.500   | 0.964  |       |
| SHO  | 2007 | 55 | 2  | 53      | 28.370   | S         | 0.500   | 0.494  |       |
| HELL | 2007 | 55 | 2  | 53      | 55.915   | S         | 0.500   | -0.902 |       |
| SND9 | 2007 | 55 | 2  | 54      | 31.948   | S         | 0.500   | -0.262 |       |
| SMM  | 2007 | 55 | 2  | 53      | 53.104   | S         | 0.500   | 0.381  |       |
| SNC8 | 2007 | 55 | 2  | 54      | 30.277   | S         | 0.500   | 0.706  |       |
| L02A | 2007 | 55 | 2  | 55      | 15.501   | S         | 0.500   | -1.960 |       |
| M09A | 2007 | 55 | 2  | 54      | 27.402   | S         | 0.500   | -0.890 |       |
| O10A | 2007 | 55 | 2  | 54      | 10.429   | S         | 0.500   | -0.908 |       |
| GSC  | 2007 | 55 | 2  | 53      | 27.637   | S         | 0.500   | 0.875  |       |
| P06A | 2007 | 55 | 2  | 54      | 30.290   | S         | 0.500   | 0.243  |       |
| MUR  | 2007 | 55 | 2  | 53      | 15.646   | S         | 0.500   | 1.393  |       |
| I09A | 2007 | 55 | 2  | 54      | 52.539   | S         | 0.500   | -1.175 |       |

|      |      |    |   |    |        |   |       |        |
|------|------|----|---|----|--------|---|-------|--------|
| CHF  | 2007 | 55 | 2 | 53 | 28.210 | S | 0.500 | 0.311  |
| O01C | 2007 | 55 | 2 | 55 | 2.807  | S | 0.500 | -0.114 |
| K07A | 2007 | 55 | 2 | 54 | 52.163 | S | 0.500 | 0.100  |
| M07A | 2007 | 55 | 2 | 54 | 38.911 | S | 0.500 | -0.987 |
| SNB7 | 2007 | 55 | 2 | 54 | 27.289 | S | 0.500 | 0.613  |
| J10A | 2007 | 55 | 2 | 54 | 42.045 | S | 0.500 | -0.310 |
| ELFS | 2007 | 55 | 2 | 54 | 43.655 | S | 0.500 | -0.669 |
| I08A | 2007 | 55 | 2 | 54 | 57.911 | S | 0.500 | -0.525 |
| J09A | 2007 | 55 | 2 | 54 | 47.326 | S | 0.500 | -0.738 |
| LRL  | 2007 | 55 | 2 | 53 | 36.465 | S | 0.500 | 1.026  |
| SN64 | 2007 | 55 | 2 | 54 | 12.046 | S | 0.500 | -0.456 |
| SNG7 | 2007 | 55 | 2 | 54 | 42.102 | S | 0.500 | -0.944 |
| HAST | 2007 | 55 | 2 | 54 | 14.280 | S | 0.500 | -0.295 |
| Q10A | 2007 | 55 | 2 | 53 | 56.904 | S | 0.500 | 0.171  |
| SLA  | 2007 | 55 | 2 | 53 | 37.379 | S | 0.500 | 1.419  |
| SN14 | 2007 | 55 | 2 | 53 | 59.479 | S | 0.500 | -0.069 |
| K08A | 2007 | 55 | 2 | 54 | 46.277 | S | 0.500 | -1.126 |
| O07A | 2007 | 55 | 2 | 54 | 25.713 | S | 0.500 | -1.078 |
| BFS  | 2007 | 55 | 2 | 53 | 25.019 | S | 0.500 | 0.914  |
| SNE5 | 2007 | 55 | 2 | 54 | 35.928 | S | 0.500 | -0.790 |
| S09A | 2007 | 55 | 2 | 53 | 52.617 | S | 0.500 | 0.174  |
| ISA  | 2007 | 55 | 2 | 53 | 44.518 | S | 0.500 | 1.037  |
| R07C | 2007 | 55 | 2 | 54 | 10.962 | S | 0.500 | 1.295  |
| WVOR | 2007 | 55 | 2 | 54 | 44.821 | S | 0.500 | -0.820 |
| PACP | 2007 | 55 | 2 | 54 | 17.312 | S | 0.500 | -0.320 |
| SNA7 | 2007 | 55 | 2 | 54 | 25.171 | S | 0.500 | 0.757  |
| R04C | 2007 | 55 | 2 | 54 | 25.637 | S | 0.500 | 0.402  |
| SNB6 | 2007 | 55 | 2 | 54 | 26.152 | S | 0.500 | 0.104  |
| SNB5 | 2007 | 55 | 2 | 54 | 27.076 | S | 0.500 | -0.510 |
| MPM  | 2007 | 55 | 2 | 53 | 40.586 | S | 0.500 | 1.211  |
| P09A | 2007 | 55 | 2 | 54 | 7.537  | S | 0.500 | -1.376 |
| SNF6 | 2007 | 55 | 2 | 54 | 38.146 | S | 0.500 | -0.816 |
| K11A | 2007 | 55 | 2 | 54 | 31.540 | S | 0.500 | -0.046 |
| SNC3 | 2007 | 55 | 2 | 54 | 31.126 | S | 0.500 | -0.001 |
| SND5 | 2007 | 55 | 2 | 54 | 32.777 | S | 0.500 | -0.513 |
| SN55 | 2007 | 55 | 2 | 54 | 10.469 | S | 0.500 | 0.161  |
| O04C | 2007 | 55 | 2 | 54 | 43.225 | S | 0.500 | -1.026 |
| SNG5 | 2007 | 55 | 2 | 54 | 41.493 | S | 0.500 | -0.847 |
| SNE6 | 2007 | 55 | 2 | 54 | 34.680 | S | 0.500 | -0.627 |
| SN87 | 2007 | 55 | 2 | 54 | 21.127 | S | 0.500 | 1.520  |
| SN97 | 2007 | 55 | 2 | 54 | 23.006 | S | 0.500 | 1.081  |
| SN75 | 2007 | 55 | 2 | 54 | 15.341 | S | 0.500 | 0.076  |
| L10A | 2007 | 55 | 2 | 54 | 27.496 | S | 0.500 | -0.429 |
| CMB  | 2007 | 55 | 2 | 54 | 18.800 | S | 0.500 | -0.561 |
| R06C | 2007 | 55 | 2 | 54 | 18.017 | S | 0.500 | 1.347  |
| SND4 | 2007 | 55 | 2 | 54 | 33.227 | S | 0.500 | -0.479 |
| SNC5 | 2007 | 55 | 2 | 54 | 30.563 | S | 0.500 | -0.185 |
| SN93 | 2007 | 55 | 2 | 54 | 21.544 | S | 0.500 | -0.301 |
| SNB3 | 2007 | 55 | 2 | 54 | 28.412 | S | 0.500 | 0.109  |
| SN98 | 2007 | 55 | 2 | 54 | 21.316 | S | 0.500 | 1.420  |
| LAVA | 2007 | 55 | 2 | 54 | 27.911 | S | 0.500 | -0.296 |
| P05C | 2007 | 55 | 2 | 54 | 31.897 | S | 0.500 | -0.129 |
| O05C | 2007 | 55 | 2 | 54 | 39.471 | S | 0.500 | -0.367 |
| SNA8 | 2007 | 55 | 2 | 54 | 23.974 | S | 0.500 | 1.052  |
| SN96 | 2007 | 55 | 2 | 54 | 21.507 | S | 0.500 | 0.710  |
| SNE9 | 2007 | 55 | 2 | 54 | 35.038 | S | 0.500 | -0.228 |
| SN84 | 2007 | 55 | 2 | 54 | 18.067 | S | 0.500 | -0.673 |
| CWC  | 2007 | 55 | 2 | 53 | 48.613 | S | 0.500 | 1.227  |
| SNE4 | 2007 | 55 | 2 | 54 | 36.401 | S | 0.500 | -0.328 |
| SNB9 | 2007 | 55 | 2 | 54 | 25.676 | S | 0.500 | 0.449  |
| SNA4 | 2007 | 55 | 2 | 54 | 24.476 | S | 0.500 | -0.069 |
| SND8 | 2007 | 55 | 2 | 54 | 32.183 | S | 0.500 | -0.066 |
| SN95 | 2007 | 55 | 2 | 54 | 20.866 | S | 0.500 | -0.304 |

|      |      |    |   |    |        |   |       |        |
|------|------|----|---|----|--------|---|-------|--------|
| SND7 | 2007 | 55 | 2 | 54 | 34.397 | S | 0.500 | -0.345 |
| WCN  | 2007 | 55 | 2 | 54 | 27.125 | S | 0.500 | 1.282  |
| O06A | 2007 | 55 | 2 | 54 | 33.062 | S | 0.500 | -0.715 |
| ORV  | 2007 | 55 | 2 | 54 | 40.451 | S | 0.500 | 0.033  |
| SNF9 | 2007 | 55 | 2 | 54 | 37.521 | S | 0.500 | -0.615 |
| R05C | 2007 | 55 | 2 | 54 | 23.548 | S | 0.500 | 0.326  |
| SNA3 | 2007 | 55 | 2 | 54 | 24.171 | S | 0.500 | -0.600 |
| SN85 | 2007 | 55 | 2 | 54 | 18.389 | S | 0.500 | -0.110 |

|      |     |    |    |        |          |            |          |    |       |
|------|-----|----|----|--------|----------|------------|----------|----|-------|
| 2007 | 119 | 12 | 42 | 0.1206 | 52.00700 | -179.97200 | 117.0000 | 34 | 2.731 |
|------|-----|----|----|--------|----------|------------|----------|----|-------|

|      |      |     |    |    |        |   |       |        |
|------|------|-----|----|----|--------|---|-------|--------|
| R05C | 2007 | 119 | 12 | 56 | 3.703  | S | 0.500 | -0.170 |
| MLAC | 2007 | 119 | 12 | 56 | 26.747 | S | 0.500 | 2.026  |
| SMM  | 2007 | 119 | 12 | 56 | 35.385 | S | 0.500 | -0.177 |
| DJJ  | 2007 | 119 | 12 | 56 | 59.181 | S | 0.500 | -1.280 |
| DEC  | 2007 | 119 | 12 | 56 | 59.239 | S | 0.500 | -1.041 |
| ARV  | 2007 | 119 | 12 | 56 | 46.600 | S | 0.500 | -0.925 |
| WENL | 2007 | 119 | 12 | 56 | 0.071  | S | 0.500 | 1.957  |
| LGU  | 2007 | 119 | 12 | 56 | 53.509 | S | 0.500 | -1.685 |
| SHO  | 2007 | 119 | 12 | 57 | 1.013  | S | 0.500 | -1.845 |
| I08A | 2007 | 119 | 12 | 55 | 31.906 | S | 0.500 | 0.102  |
| R08A | 2007 | 119 | 12 | 56 | 24.385 | S | 0.500 | 0.051  |
| SCZ2 | 2007 | 119 | 12 | 56 | 49.786 | S | 0.500 | -1.389 |
| HATC | 2007 | 119 | 12 | 55 | 33.339 | S | 0.500 | 1.196  |
| MPP  | 2007 | 119 | 12 | 56 | 41.137 | S | 0.500 | -0.303 |
| CWC  | 2007 | 119 | 12 | 56 | 42.436 | S | 0.500 | 0.188  |
| PHL  | 2007 | 119 | 12 | 56 | 30.871 | S | 0.500 | 1.299  |
| SND9 | 2007 | 119 | 12 | 55 | 54.328 | S | 0.500 | 0.104  |
| S04C | 2007 | 119 | 12 | 56 | 4.716  | S | 0.500 | 1.645  |
| FMP  | 2007 | 119 | 12 | 57 | 4.596  | S | 0.500 | -0.902 |
| O01C | 2007 | 119 | 12 | 55 | 18.583 | S | 0.500 | 2.276  |
| SN87 | 2007 | 119 | 12 | 56 | 8.842  | S | 0.500 | 0.536  |
| RRX  | 2007 | 119 | 12 | 57 | 4.925  | S | 0.500 | -1.076 |
| J04A | 2007 | 119 | 12 | 55 | 6.519  | S | 0.500 | 0.760  |
| DBO  | 2007 | 119 | 12 | 54 | 58.263 | S | 0.500 | 2.111  |
| J05A | 2007 | 119 | 12 | 55 | 15.006 | S | 0.500 | 1.913  |
| K08A | 2007 | 119 | 12 | 55 | 42.626 | S | 0.500 | 0.222  |
| CIA  | 2007 | 119 | 12 | 57 | 6.712  | S | 0.500 | -0.933 |
| I03A | 2007 | 119 | 12 | 54 | 50.237 | S | 0.500 | 1.737  |
| P01C | 2007 | 119 | 12 | 55 | 28.205 | S | 0.500 | 1.399  |
| SUTB | 2007 | 119 | 12 | 55 | 42.451 | S | 0.500 | -0.670 |
| SN14 | 2007 | 119 | 12 | 56 | 30.319 | S | 0.500 | 0.430  |
| R04C | 2007 | 119 | 12 | 56 | 0.102  | S | 0.500 | 0.562  |
| RPV  | 2007 | 119 | 12 | 57 | 3.338  | S | 0.500 | -1.095 |
| HOPS | 2007 | 119 | 12 | 55 | 34.678 | S | 0.500 | 1.024  |
| DGR  | 2007 | 119 | 12 | 57 | 16.320 | S | 0.500 | -1.163 |
| LRL  | 2007 | 119 | 12 | 56 | 52.708 | S | 0.500 | -1.911 |
| L04A | 2007 | 119 | 12 | 55 | 18.059 | S | 0.500 | 1.585  |
| ELFS | 2007 | 119 | 12 | 55 | 41.945 | S | 0.500 | 1.390  |
| SNA8 | 2007 | 119 | 12 | 56 | 4.321  | S | 0.500 | -0.187 |
| PLM  | 2007 | 119 | 12 | 57 | 21.560 | S | 0.500 | -0.365 |
| SN34 | 2007 | 119 | 12 | 56 | 25.541 | S | 0.500 | 0.622  |
| OSI  | 2007 | 119 | 12 | 56 | 53.192 | S | 0.500 | -0.282 |
| PASC | 2007 | 119 | 12 | 57 | 1.320  | S | 0.500 | -0.929 |
| SND7 | 2007 | 119 | 12 | 55 | 49.946 | S | 0.500 | -0.998 |
| SN55 | 2007 | 119 | 12 | 56 | 18.698 | S | 0.500 | 0.602  |
| S05C | 2007 | 119 | 12 | 56 | 13.328 | S | 0.500 | -0.148 |
| SNG5 | 2007 | 119 | 12 | 55 | 40.283 | S | 0.500 | -0.803 |
| SNE7 | 2007 | 119 | 12 | 55 | 47.450 | S | 0.500 | -0.495 |
| N08A | 2007 | 119 | 12 | 56 | 2.241  | S | 0.500 | -0.209 |
| SNA4 | 2007 | 119 | 12 | 56 | 1.567  | S | 0.500 | 0.349  |
| MPM  | 2007 | 119 | 12 | 56 | 50.437 | S | 0.500 | -0.577 |
| JCS  | 2007 | 119 | 12 | 57 | 26.518 | S | 0.500 | -0.201 |
| ORV  | 2007 | 119 | 12 | 55 | 41.499 | S | 0.500 | -1.310 |

|      |      |     |    |    |        |   |       |        |
|------|------|-----|----|----|--------|---|-------|--------|
| SNC5 | 2007 | 119 | 12 | 55 | 53.478 | S | 0.500 | -0.904 |
| WDC  | 2007 | 119 | 12 | 55 | 25.681 | S | 0.500 | 1.535  |
| M05C | 2007 | 119 | 12 | 55 | 31.439 | S | 0.500 | 1.128  |
| SNE4 | 2007 | 119 | 12 | 55 | 46.402 | S | 0.500 | -0.493 |
| MOD  | 2007 | 119 | 12 | 55 | 33.878 | S | 0.500 | 0.497  |
| HEC  | 2007 | 119 | 12 | 57 | 11.358 | S | 0.500 | -0.992 |
| SN74 | 2007 | 119 | 12 | 56 | 12.037 | S | 0.500 | 0.539  |
| SN95 | 2007 | 119 | 12 | 56 | 5.886  | S | 0.500 | 0.447  |
| SNF8 | 2007 | 119 | 12 | 55 | 46.855 | S | 0.500 | -0.100 |
| SNE9 | 2007 | 119 | 12 | 55 | 50.857 | S | 0.500 | 0.031  |
| HELL | 2007 | 119 | 12 | 56 | 30.930 | S | 0.500 | -0.628 |
| EDW2 | 2007 | 119 | 12 | 56 | 56.364 | S | 0.500 | -0.863 |
| SNA7 | 2007 | 119 | 12 | 56 | 2.802  | S | 0.500 | 0.163  |
| SNF6 | 2007 | 119 | 12 | 55 | 44.697 | S | 0.500 | -0.935 |
| SNC6 | 2007 | 119 | 12 | 55 | 55.908 | S | 0.500 | -0.950 |
| SN84 | 2007 | 119 | 12 | 56 | 8.453  | S | 0.500 | 0.335  |
| SNE6 | 2007 | 119 | 12 | 55 | 48.634 | S | 0.500 | -1.043 |
| SND5 | 2007 | 119 | 12 | 55 | 50.224 | S | 0.500 | -1.121 |
| WCN  | 2007 | 119 | 12 | 56 | 0.990  | S | 0.500 | -0.224 |
| SN43 | 2007 | 119 | 12 | 56 | 21.341 | S | 0.500 | 0.340  |
| MUR  | 2007 | 119 | 12 | 57 | 15.329 | S | 0.500 | -1.001 |
| SNA3 | 2007 | 119 | 12 | 56 | 1.396  | S | 0.500 | 0.802  |
| SND4 | 2007 | 119 | 12 | 55 | 49.895 | S | 0.500 | -0.578 |
| SND8 | 2007 | 119 | 12 | 55 | 53.221 | S | 0.500 | -0.608 |
| O04C | 2007 | 119 | 12 | 55 | 40.856 | S | 0.500 | 0.796  |
| SN64 | 2007 | 119 | 12 | 56 | 16.031 | S | 0.500 | 0.612  |
| SNE5 | 2007 | 119 | 12 | 55 | 46.433 | S | 0.500 | -1.139 |
| SNC3 | 2007 | 119 | 12 | 55 | 54.096 | S | 0.500 | 0.946  |
| SN75 | 2007 | 119 | 12 | 56 | 13.127 | S | 0.500 | 0.511  |
| O05C | 2007 | 119 | 12 | 55 | 44.707 | S | 0.500 | 0.151  |
| BEK  | 2007 | 119 | 12 | 55 | 50.275 | S | 0.500 | -0.470 |
| YBH  | 2007 | 119 | 12 | 55 | 15.174 | S | 0.500 | 2.423  |
| SNB6 | 2007 | 119 | 12 | 56 | 0.112  | S | 0.500 | -0.356 |
| SN63 | 2007 | 119 | 12 | 56 | 15.466 | S | 0.500 | 0.258  |
| SNB3 | 2007 | 119 | 12 | 55 | 56.924 | S | 0.500 | 0.558  |
| SNC7 | 2007 | 119 | 12 | 55 | 54.468 | S | 0.500 | -1.080 |
| SN85 | 2007 | 119 | 12 | 56 | 9.231  | S | 0.500 | 0.467  |
| VTV  | 2007 | 119 | 12 | 57 | 5.294  | S | 0.500 | -0.853 |
| SN96 | 2007 | 119 | 12 | 56 | 6.423  | S | 0.500 | 0.228  |
| VES  | 2007 | 119 | 12 | 56 | 37.077 | S | 0.500 | -1.443 |

|      |      |     |    |         |          |           |          |        |       |
|------|------|-----|----|---------|----------|-----------|----------|--------|-------|
| 2007 | 182  | 4   | 12 | 10.2128 | 43.66300 | 144.73399 | 130.4000 | 35     | 2.463 |
| PLM  | 2007 | 182 | 4  | 32      | 44.905   | S         | 0.500    | -0.977 |       |
| U04C | 2007 | 182 | 4  | 31      | 55.476   | S         | 0.500    | 0.719  |       |
| HAST | 2007 | 182 | 4  | 31      | 47.947   | S         | 0.500    | -0.901 |       |
| SLA  | 2007 | 182 | 4  | 32      | 21.919   | S         | 0.500    | -1.846 |       |
| HATC | 2007 | 182 | 4  | 31      | 17.515   | S         | 0.500    | 0.810  |       |
| MPP  | 2007 | 182 | 4  | 32      | 12.713   | S         | 0.500    | -0.396 |       |
| BDM  | 2007 | 182 | 4  | 31      | 35.948   | S         | 0.500    | 1.203  |       |
| FMP  | 2007 | 182 | 4  | 32      | 31.276   | S         | 0.500    | -1.111 |       |
| R10A | 2007 | 182 | 4  | 32      | 12.243   | S         | 0.500    | -0.527 |       |
| J04A | 2007 | 182 | 4  | 30      | 55.912   | S         | 0.500    | 1.501  |       |
| WENL | 2007 | 182 | 4  | 31      | 38.924   | S         | 0.500    | 0.848  |       |
| DEC  | 2007 | 182 | 4  | 32      | 26.785   | S         | 0.500    | -1.590 |       |
| DGR  | 2007 | 182 | 4  | 32      | 40.699   | S         | 0.500    | -1.523 |       |
| OSI  | 2007 | 182 | 4  | 32      | 22.375   | S         | 0.500    | -0.545 |       |
| DBO  | 2007 | 182 | 4  | 30      | 49.342   | S         | 0.500    | 2.642  |       |
| O02C | 2007 | 182 | 4  | 31      | 12.805   | S         | 0.500    | 1.165  |       |
| M10A | 2007 | 182 | 4  | 31      | 47.624   | S         | 0.500    | 1.206  |       |
| J07A | 2007 | 182 | 4  | 31      | 15.051   | S         | 0.500    | 1.768  |       |
| GSC  | 2007 | 182 | 4  | 32      | 30.021   | S         | 0.500    | -1.388 |       |
| SUTB | 2007 | 182 | 4  | 31      | 25.254   | S         | 0.500    | -0.611 |       |
| PKD  | 2007 | 182 | 4  | 31      | 59.272   | S         | 0.500    | -0.352 |       |



|      |      |     |   |    |        |   |       |        |
|------|------|-----|---|----|--------|---|-------|--------|
| MNRC | 2007 | 182 | 4 | 31 | 26.083 | S | 0.500 | 2.254  |
| PHL  | 2007 | 182 | 4 | 32 | 2.863  | S | 0.500 | -0.511 |
| Q09A | 2007 | 182 | 4 | 32 | 1.990  | S | 0.500 | -0.298 |
| BBR  | 2007 | 182 | 4 | 32 | 36.677 | S | 0.500 | -2.208 |
| GRA  | 2007 | 182 | 4 | 32 | 14.758 | S | 0.500 | 0.171  |
| GASB | 2007 | 182 | 4 | 31 | 17.400 | S | 0.500 | 1.245  |
| JCS  | 2007 | 182 | 4 | 32 | 48.691 | S | 0.500 | -0.993 |
| RCT  | 2007 | 182 | 4 | 32 | 4.488  | S | 0.500 | -1.616 |
| SN87 | 2007 | 182 | 4 | 31 | 46.815 | S | 0.500 | 0.340  |
| M04C | 2007 | 182 | 4 | 31 | 8.053  | S | 0.500 | 1.170  |
| J10A | 2007 | 182 | 4 | 31 | 31.516 | S | 0.500 | 1.118  |
| LRL  | 2007 | 182 | 4 | 32 | 22.287 | S | 0.500 | -1.718 |
| YBH  | 2007 | 182 | 4 | 31 | 2.877  | S | 0.500 | 2.246  |
| MUR  | 2007 | 182 | 4 | 32 | 39.955 | S | 0.500 | -1.301 |
| L04A | 2007 | 182 | 4 | 31 | 5.032  | S | 0.500 | 1.561  |
| PASC | 2007 | 182 | 4 | 32 | 28.367 | S | 0.500 | -1.538 |
| SN97 | 2007 | 182 | 4 | 31 | 43.757 | S | 0.500 | -0.181 |
| SVD  | 2007 | 182 | 4 | 32 | 36.243 | S | 0.500 | -2.161 |
| SHO  | 2007 | 182 | 4 | 32 | 29.233 | S | 0.500 | -1.396 |
| SNF9 | 2007 | 182 | 4 | 31 | 29.078 | S | 0.500 | -0.162 |
| SND9 | 2007 | 182 | 4 | 31 | 34.830 | S | 0.500 | -0.042 |
| M05C | 2007 | 182 | 4 | 31 | 15.988 | S | 0.500 | 0.922  |
| SNF8 | 2007 | 182 | 4 | 31 | 28.473 | S | 0.500 | -0.472 |
| R06C | 2007 | 182 | 4 | 31 | 48.863 | S | 0.500 | 0.175  |
| Q10A | 2007 | 182 | 4 | 32 | 7.007  | S | 0.500 | -0.868 |
| K06A | 2007 | 182 | 4 | 31 | 12.805 | S | 0.500 | 1.943  |
| SNB7 | 2007 | 182 | 4 | 31 | 39.066 | S | 0.500 | -0.664 |
| M06C | 2007 | 182 | 4 | 31 | 22.275 | S | 0.500 | 1.137  |
| K07A | 2007 | 182 | 4 | 31 | 20.633 | S | 0.500 | 1.817  |
| WDC  | 2007 | 182 | 4 | 31 | 10.814 | S | 0.500 | 0.633  |
| L09A | 2007 | 182 | 4 | 31 | 36.434 | S | 0.500 | 1.461  |
| FUR  | 2007 | 182 | 4 | 32 | 21.238 | S | 0.500 | -0.651 |
| O10A | 2007 | 182 | 4 | 31 | 57.010 | S | 0.500 | 0.967  |
| MPM  | 2007 | 182 | 4 | 32 | 19.856 | S | 0.500 | -1.350 |
| MWC  | 2007 | 182 | 4 | 32 | 29.284 | S | 0.500 | -1.649 |
| BFS  | 2007 | 182 | 4 | 32 | 31.974 | S | 0.500 | -1.486 |
| SN98 | 2007 | 182 | 4 | 31 | 45.648 | S | 0.500 | -0.107 |
| SNC6 | 2007 | 182 | 4 | 31 | 35.929 | S | 0.500 | -1.277 |
| S10A | 2007 | 182 | 4 | 32 | 13.122 | S | 0.500 | -0.329 |
| VCS  | 2007 | 182 | 4 | 32 | 27.408 | S | 0.500 | -0.887 |
| K11A | 2007 | 182 | 4 | 31 | 42.026 | S | 0.500 | 1.736  |
| R05C | 2007 | 182 | 4 | 31 | 42.449 | S | 0.500 | -0.413 |
| ORV  | 2007 | 182 | 4 | 31 | 24.041 | S | 0.500 | -1.584 |
| PIN  | 2007 | 182 | 4 | 31 | 1.233  | S | 0.500 | 2.181  |
| J02A | 2007 | 182 | 4 | 30 | 45.109 | S | 0.500 | 2.808  |
| N07B | 2007 | 182 | 4 | 31 | 35.678 | S | 0.500 | 0.612  |
| TPNV | 2007 | 182 | 4 | 32 | 22.691 | S | 0.500 | -0.521 |
| SND7 | 2007 | 182 | 4 | 31 | 30.879 | S | 0.500 | -1.340 |
| O09A | 2007 | 182 | 4 | 31 | 53.046 | S | 0.500 | 1.003  |
| SNA7 | 2007 | 182 | 4 | 31 | 41.423 | S | 0.500 | -0.373 |
| Q08A | 2007 | 182 | 4 | 31 | 56.514 | S | 0.500 | -0.412 |
| SNE7 | 2007 | 182 | 4 | 31 | 28.738 | S | 0.500 | -0.965 |
| SNG5 | 2007 | 182 | 4 | 31 | 22.724 | S | 0.500 | -1.412 |
| SNB9 | 2007 | 182 | 4 | 31 | 41.230 | S | 0.500 | -0.051 |
| R04C | 2007 | 182 | 4 | 31 | 39.298 | S | 0.500 | 0.083  |
| WCN  | 2007 | 182 | 4 | 31 | 40.192 | S | 0.500 | -0.410 |
| L10A | 2007 | 182 | 4 | 31 | 44.342 | S | 0.500 | 1.531  |
| O04C | 2007 | 182 | 4 | 31 | 23.737 | S | 0.500 | 0.479  |
| CMB  | 2007 | 182 | 4 | 31 | 45.683 | S | 0.500 | 0.565  |
| SNG7 | 2007 | 182 | 4 | 31 | 24.021 | S | 0.500 | -0.253 |
| N08A | 2007 | 182 | 4 | 31 | 41.784 | S | 0.500 | 0.765  |
| O05C | 2007 | 182 | 4 | 31 | 26.478 | S | 0.500 | -0.424 |
| SN55 | 2007 | 182 | 4 | 31 | 54.688 | S | 0.500 | 0.166  |

|      |      |     |   |    |        |   |       |        |
|------|------|-----|---|----|--------|---|-------|--------|
| J03A | 2007 | 182 | 4 | 30 | 49.256 | S | 0.500 | 2.571  |
| SNE6 | 2007 | 182 | 4 | 31 | 29.754 | S | 0.500 | -1.504 |
| SNA4 | 2007 | 182 | 4 | 31 | 40.608 | S | 0.500 | -0.065 |
| SND4 | 2007 | 182 | 4 | 31 | 31.517 | S | 0.500 | -0.378 |
| S08C | 2007 | 182 | 4 | 32 | 6.664  | S | 0.500 | 0.882  |
| L08A | 2007 | 182 | 4 | 31 | 30.273 | S | 0.500 | 1.461  |
| SNA3 | 2007 | 182 | 4 | 31 | 40.628 | S | 0.500 | 0.491  |
| SND8 | 2007 | 182 | 4 | 31 | 33.738 | S | 0.500 | -0.811 |
| SNC5 | 2007 | 182 | 4 | 31 | 34.187 | S | 0.500 | -0.836 |
| BEK  | 2007 | 182 | 4 | 31 | 31.245 | S | 0.500 | -0.834 |
| N09A | 2007 | 182 | 4 | 31 | 45.617 | S | 0.500 | 0.981  |
| I09A | 2007 | 182 | 4 | 31 | 21.841 | S | 0.500 | 2.212  |
| HEC  | 2007 | 182 | 4 | 32 | 37.329 | S | 0.500 | -0.990 |
| SNF6 | 2007 | 182 | 4 | 31 | 26.495 | S | 0.500 | -1.393 |
| SN63 | 2007 | 182 | 4 | 31 | 51.685 | S | 0.500 | -0.502 |
| SN96 | 2007 | 182 | 4 | 31 | 44.894 | S | 0.500 | 0.076  |
| EDW2 | 2007 | 182 | 4 | 32 | 25.211 | S | 0.500 | -0.750 |
| S06C | 2007 | 182 | 4 | 31 | 50.288 | S | 0.500 | -0.174 |
| SND5 | 2007 | 182 | 4 | 31 | 31.596 | S | 0.500 | -0.987 |
| HELL | 2007 | 182 | 4 | 32 | 3.920  | S | 0.500 | -1.440 |
| SNE5 | 2007 | 182 | 4 | 31 | 28.391 | S | 0.500 | -1.162 |
| S09A | 2007 | 182 | 4 | 32 | 10.764 | S | 0.500 | 0.240  |
| K08A | 2007 | 182 | 4 | 31 | 25.579 | S | 0.500 | 1.838  |
| SNE4 | 2007 | 182 | 4 | 31 | 28.237 | S | 0.500 | -0.610 |
| SN64 | 2007 | 182 | 4 | 31 | 52.275 | S | 0.500 | -0.124 |
| SN93 | 2007 | 182 | 4 | 31 | 43.608 | S | 0.500 | 1.108  |
| O08A | 2007 | 182 | 4 | 31 | 45.325 | S | 0.500 | 0.764  |
| WVOR | 2007 | 182 | 4 | 31 | 26.449 | S | 0.500 | 1.544  |
| SNC7 | 2007 | 182 | 4 | 31 | 34.758 | S | 0.500 | -1.307 |
| SNB3 | 2007 | 182 | 4 | 31 | 37.272 | S | 0.500 | 0.538  |

|      |      |     |    |         |          |           |          |        |
|------|------|-----|----|---------|----------|-----------|----------|--------|
| 2007 | 193  | 5   | 23 | 56.7244 | -7.93300 | -74.37900 | 152.1000 |        |
| ADO  | 2007 | 193 | 5  | 41      | 30.996   | S         | 0.500    | -0.396 |
| WCN  | 2007 | 193 | 5  | 42      | 28.167   | S         | 0.500    | 1.116  |
| SN64 | 2007 | 193 | 5  | 42      | 14.854   | S         | 0.500    | -0.588 |
| YO04 | 2007 | 193 | 5  | 42      | 14.960   | S         | 0.500    | -0.566 |
| YO10 | 2007 | 193 | 5  | 42      | 12.949   | S         | 0.500    | -0.879 |
| S08C | 2007 | 193 | 5  | 42      | 1.520    | S         | 0.500    | 0.431  |
| YO09 | 2007 | 193 | 5  | 42      | 13.524   | S         | 0.500    | -0.498 |
| Q04C | 2007 | 193 | 5  | 42      | 36.013   | S         | 0.500    | 0.317  |
| SNE6 | 2007 | 193 | 5  | 42      | 36.087   | S         | 0.500    | -0.475 |
| R05C | 2007 | 193 | 5  | 42      | 25.934   | S         | 0.500    | 0.695  |
| SNC5 | 2007 | 193 | 5  | 42      | 32.589   | S         | 0.500    | 0.083  |
| O04C | 2007 | 193 | 5  | 42      | 43.778   | S         | 0.500    | -0.770 |
| P06A | 2007 | 193 | 5  | 42      | 31.271   | S         | 0.500    | 0.399  |
| YO06 | 2007 | 193 | 5  | 42      | 14.591   | S         | 0.500    | -0.575 |
| CMB  | 2007 | 193 | 5  | 42      | 22.045   | S         | 0.500    | -0.188 |
| P09A | 2007 | 193 | 5  | 42      | 7.623    | S         | 0.500    | -1.538 |
| SNB3 | 2007 | 193 | 5  | 42      | 31.285   | S         | 0.500    | 0.614  |
| YO01 | 2007 | 193 | 5  | 42      | 14.712   | S         | 0.500    | -0.839 |
| SND4 | 2007 | 193 | 5  | 42      | 35.465   | S         | 0.500    | -0.070 |
| SNG5 | 2007 | 193 | 5  | 42      | 42.584   | S         | 0.500    | -0.816 |
| SN93 | 2007 | 193 | 5  | 42      | 24.787   | S         | 0.500    | 0.169  |
| SNF8 | 2007 | 193 | 5  | 42      | 38.608   | S         | 0.500    | -0.545 |
| SNG7 | 2007 | 193 | 5  | 42      | 42.720   | S         | 0.500    | -0.853 |
| SNB6 | 2007 | 193 | 5  | 42      | 28.509   | S         | 0.500    | 0.641  |
| ORV  | 2007 | 193 | 5  | 42      | 41.682   | S         | 0.500    | 0.017  |
| SN96 | 2007 | 193 | 5  | 42      | 23.809   | S         | 0.500    | 0.720  |
| SND9 | 2007 | 193 | 5  | 42      | 33.026   | S         | 0.500    | 0.158  |
| SNA3 | 2007 | 193 | 5  | 42      | 27.659   | S         | 0.500    | 0.379  |
| R06C | 2007 | 193 | 5  | 42      | 20.441   | S         | 0.500    | 1.679  |
| P05C | 2007 | 193 | 5  | 42      | 33.668   | S         | 0.500    | 0.218  |
| YO11 | 2007 | 193 | 5  | 42      | 13.609   | S         | 0.500    | -0.123 |

36

7.384

|      |      |     |   |    |        |   |       |        |
|------|------|-----|---|----|--------|---|-------|--------|
| S04C | 2007 | 193 | 5 | 42 | 26.763 | S | 0.500 | 1.198  |
| SNA4 | 2007 | 193 | 5 | 42 | 27.139 | S | 0.500 | 0.256  |
| SN55 | 2007 | 193 | 5 | 42 | 13.295 | S | 0.500 | 0.102  |
| O05C | 2007 | 193 | 5 | 42 | 40.117 | S | 0.500 | -0.399 |
| SNF6 | 2007 | 193 | 5 | 42 | 39.106 | S | 0.500 | -0.928 |
| SNB9 | 2007 | 193 | 5 | 42 | 26.773 | S | 0.500 | 0.407  |
| SNC7 | 2007 | 193 | 5 | 42 | 32.183 | S | 0.500 | 0.093  |
| R04C | 2007 | 193 | 5 | 42 | 28.412 | S | 0.500 | 0.475  |
| SNE4 | 2007 | 193 | 5 | 42 | 38.283 | S | 0.500 | -0.077 |
| SND8 | 2007 | 193 | 5 | 42 | 33.466 | S | 0.500 | 0.312  |
| SNE7 | 2007 | 193 | 5 | 42 | 37.559 | S | 0.500 | -0.553 |
| SNE9 | 2007 | 193 | 5 | 42 | 35.766 | S | 0.500 | 0.009  |
| SND7 | 2007 | 193 | 5 | 42 | 35.479 | S | 0.500 | -0.267 |
| BEK  | 2007 | 193 | 5 | 42 | 35.711 | S | 0.500 | -0.014 |
| Q07A | 2007 | 193 | 5 | 42 | 16.719 | S | 0.500 | -0.129 |
| DEC  | 2007 | 193 | 5 | 41 | 36.735 | S | 0.500 | 0.059  |
| M09A | 2007 | 193 | 5 | 42 | 25.009 | S | 0.500 | -1.353 |
| N09A | 2007 | 193 | 5 | 42 | 21.469 | S | 0.500 | -0.919 |
| HUMO | 2007 | 193 | 5 | 43 | 11.756 | S | 0.500 | -2.756 |
| SLA  | 2007 | 193 | 5 | 41 | 41.410 | S | 0.500 | 0.619  |
| L08A | 2007 | 193 | 5 | 42 | 37.240 | S | 0.500 | -1.639 |
| ARV  | 2007 | 193 | 5 | 41 | 47.585 | S | 0.500 | 0.180  |
| U04C | 2007 | 193 | 5 | 42 | 12.564 | S | 0.500 | -0.425 |
| Q09A | 2007 | 193 | 5 | 42 | 3.263  | S | 0.500 | -0.448 |
| HOPS | 2007 | 193 | 5 | 42 | 52.636 | S | 0.500 | 2.706  |
| J06A | 2007 | 193 | 5 | 43 | 0.154  | S | 0.500 | 0.566  |
| MUR  | 2007 | 193 | 5 | 41 | 23.150 | S | 0.500 | 1.211  |
| PLM  | 2007 | 193 | 5 | 41 | 17.932 | S | 0.500 | 0.593  |
| DJJ  | 2007 | 193 | 5 | 41 | 37.184 | S | 0.500 | 0.532  |
| PHL  | 2007 | 193 | 5 | 42 | 4.197  | S | 0.500 | 0.067  |
| VES  | 2007 | 193 | 5 | 41 | 54.957 | S | 0.500 | -0.059 |
| GRA  | 2007 | 193 | 5 | 41 | 51.023 | S | 0.500 | 0.787  |
| O10A | 2007 | 193 | 5 | 42 | 9.066  | S | 0.500 | -1.430 |
| MOD  | 2007 | 193 | 5 | 42 | 49.808 | S | 0.500 | -0.703 |
| SHO  | 2007 | 193 | 5 | 41 | 33.015 | S | 0.500 | 0.611  |
| SN97 | 2007 | 193 | 5 | 42 | 24.860 | S | 0.500 | 1.093  |
| K11A | 2007 | 193 | 5 | 42 | 28.067 | S | 0.500 | 0.471  |
| S10A | 2007 | 193 | 5 | 41 | 52.118 | S | 0.500 | 0.369  |
| GSC  | 2007 | 193 | 5 | 41 | 32.725 | S | 0.500 | 0.510  |
| MWC  | 2007 | 193 | 5 | 41 | 34.461 | S | 0.500 | 0.156  |
| N08A | 2007 | 193 | 5 | 42 | 25.587 | S | 0.500 | -0.690 |
| BFS  | 2007 | 193 | 5 | 41 | 31.185 | S | 0.500 | 0.117  |
| CVS  | 2007 | 193 | 5 | 42 | 40.920 | S | 0.500 | 0.217  |
| K10A | 2007 | 193 | 5 | 42 | 33.522 | S | 0.500 | 0.083  |
| L10A | 2007 | 193 | 5 | 42 | 25.057 | S | 0.500 | 0.141  |
| PASC | 2007 | 193 | 5 | 41 | 35.036 | S | 0.500 | 0.203  |
| N07B | 2007 | 193 | 5 | 42 | 31.094 | S | 0.500 | -1.207 |
| SN98 | 2007 | 193 | 5 | 42 | 23.006 | S | 0.500 | 1.472  |
| S09A | 2007 | 193 | 5 | 41 | 55.318 | S | 0.500 | 0.326  |
| YO02 | 2007 | 193 | 5 | 42 | 14.680 | S | 0.500 | -1.017 |
| MNRC | 2007 | 193 | 5 | 42 | 45.828 | S | 0.500 | 1.534  |
| Q10A | 2007 | 193 | 5 | 41 | 57.807 | S | 0.500 | 0.120  |
| BBR  | 2007 | 193 | 5 | 41 | 25.882 | S | 0.500 | 0.856  |
| SVD  | 2007 | 193 | 5 | 41 | 25.940 | S | 0.500 | 0.978  |
| WENL | 2007 | 193 | 5 | 42 | 31.643 | S | 0.500 | 1.811  |
| L07A | 2007 | 193 | 5 | 42 | 44.172 | S | 0.500 | -0.409 |
| FARB | 2007 | 193 | 5 | 42 | 40.695 | S | 0.500 | 0.151  |
| JRSC | 2007 | 193 | 5 | 42 | 33.301 | S | 0.500 | 1.115  |
| SNE5 | 2007 | 193 | 5 | 42 | 37.554 | S | 0.500 | -0.583 |
| SN87 | 2007 | 193 | 5 | 42 | 22.894 | S | 0.500 | 1.317  |
| YO05 | 2007 | 193 | 5 | 42 | 14.989 | S | 0.500 | -0.566 |
| T06C | 2007 | 193 | 5 | 42 | 5.642  | S | 0.500 | -3.264 |
| EDW2 | 2007 | 193 | 5 | 41 | 37.891 | S | 0.500 | -0.889 |

|      |      |     |   |    |        |   |       |        |
|------|------|-----|---|----|--------|---|-------|--------|
| SND5 | 2007 | 193 | 5 | 42 | 34.637 | S | 0.500 | -0.264 |
| SNA7 | 2007 | 193 | 5 | 42 | 27.205 | S | 0.500 | 1.156  |
| SUTB | 2007 | 193 | 5 | 42 | 41.506 | S | 0.500 | -0.179 |
| YO08 | 2007 | 193 | 5 | 42 | 13.811 | S | 0.500 | -0.418 |
| VCS  | 2007 | 193 | 5 | 41 | 36.286 | S | 0.500 | -0.483 |
| YO03 | 2007 | 193 | 5 | 42 | 14.799 | S | 0.500 | -0.773 |
| HELL | 2007 | 193 | 5 | 41 | 59.480 | S | 0.500 | -1.582 |
| SNB7 | 2007 | 193 | 5 | 42 | 28.874 | S | 0.500 | 0.593  |
| MPM  | 2007 | 193 | 5 | 41 | 44.963 | S | 0.500 | 0.932  |

|      |     |    |    |        |          |           |          |    |       |
|------|-----|----|----|--------|----------|-----------|----------|----|-------|
| 2007 | 202 | 13 | 27 | 9.8061 | -8.13300 | -71.27200 | 644.9000 | 37 | 5.396 |
|------|-----|----|----|--------|----------|-----------|----------|----|-------|

|      |      |     |    |    |        |   |       |        |
|------|------|-----|----|----|--------|---|-------|--------|
| MUR  | 2007 | 202 | 13 | 43 | 45.143 | S | 0.500 | 1.030  |
| MPM  | 2007 | 202 | 13 | 44 | 4.797  | S | 0.500 | 0.651  |
| TPH  | 2007 | 202 | 13 | 44 | 16.448 | S | 0.500 | 0.120  |
| BDM  | 2007 | 202 | 13 | 44 | 52.781 | S | 0.500 | 1.655  |
| J06A | 2007 | 202 | 13 | 45 | 14.911 | S | 0.500 | 1.328  |
| LRL  | 2007 | 202 | 13 | 44 | 1.884  | S | 0.500 | 0.447  |
| JRSC | 2007 | 202 | 13 | 44 | 50.994 | S | 0.500 | 0.574  |
| CWC  | 2007 | 202 | 13 | 44 | 12.055 | S | 0.500 | 0.587  |
| YO04 | 2007 | 202 | 13 | 44 | 34.258 | S | 0.500 | 0.382  |
| L10A | 2007 | 202 | 13 | 44 | 40.204 | S | 0.500 | 0.025  |
| SNC6 | 2007 | 202 | 13 | 44 | 48.421 | S | 0.500 | 0.326  |
| CVS  | 2007 | 202 | 13 | 44 | 58.804 | S | 0.500 | 0.610  |
| SNF8 | 2007 | 202 | 13 | 44 | 55.445 | S | 0.500 | -0.206 |
| S06C | 2007 | 202 | 13 | 44 | 35.195 | S | 0.500 | -0.041 |
| K11A | 2007 | 202 | 13 | 44 | 43.220 | S | 0.500 | 0.908  |
| GSC  | 2007 | 202 | 13 | 43 | 53.224 | S | 0.500 | 0.163  |
| SND8 | 2007 | 202 | 13 | 44 | 50.144 | S | 0.500 | 0.155  |
| LAVA | 2007 | 202 | 13 | 44 | 47.515 | S | 0.500 | -0.226 |
| MWC  | 2007 | 202 | 13 | 43 | 55.604 | S | 0.500 | -0.212 |
| K10A | 2007 | 202 | 13 | 44 | 48.624 | S | 0.500 | 0.517  |
| DGR  | 2007 | 202 | 13 | 43 | 43.880 | S | 0.500 | 0.954  |
| SHO  | 2007 | 202 | 13 | 43 | 53.034 | S | 0.500 | 0.234  |
| I06A | 2007 | 202 | 13 | 45 | 20.279 | S | 0.500 | 1.516  |
| VCS  | 2007 | 202 | 13 | 43 | 57.109 | S | 0.500 | -0.955 |
| HEC  | 2007 | 202 | 13 | 43 | 45.814 | S | 0.500 | 0.090  |
| SNC5 | 2007 | 202 | 13 | 44 | 49.729 | S | 0.500 | -0.037 |
| SNG5 | 2007 | 202 | 13 | 44 | 59.319 | S | 0.500 | -0.669 |
| CHF  | 2007 | 202 | 13 | 43 | 55.949 | S | 0.500 | -0.314 |
| CIA  | 2007 | 202 | 13 | 43 | 53.179 | S | 0.500 | 0.223  |
| BFS  | 2007 | 202 | 13 | 43 | 52.731 | S | 0.500 | 0.093  |
| SND4 | 2007 | 202 | 13 | 44 | 52.234 | S | 0.500 | -0.467 |
| S09A | 2007 | 202 | 13 | 44 | 14.270 | S | 0.500 | 0.504  |
| S08C | 2007 | 202 | 13 | 44 | 20.840 | S | 0.500 | 0.915  |
| SNB9 | 2007 | 202 | 13 | 44 | 44.166 | S | 0.500 | 0.631  |
| SNA4 | 2007 | 202 | 13 | 44 | 44.725 | S | 0.500 | 0.152  |
| PASC | 2007 | 202 | 13 | 43 | 56.150 | S | 0.500 | -0.226 |
| PACP | 2007 | 202 | 13 | 44 | 40.751 | S | 0.500 | 0.142  |
| R05C | 2007 | 202 | 13 | 44 | 43.480 | S | 0.500 | 0.619  |
| SNF6 | 2007 | 202 | 13 | 44 | 55.986 | S | 0.500 | -0.754 |
| SND5 | 2007 | 202 | 13 | 44 | 52.071 | S | 0.500 | 0.086  |
| WCN  | 2007 | 202 | 13 | 44 | 45.477 | S | 0.500 | 1.246  |
| SNC7 | 2007 | 202 | 13 | 44 | 49.402 | S | 0.500 | 0.234  |
| BEK  | 2007 | 202 | 13 | 44 | 52.601 | S | 0.500 | 0.242  |
| SN96 | 2007 | 202 | 13 | 44 | 41.990 | S | 0.500 | 1.102  |
| SNF9 | 2007 | 202 | 13 | 44 | 54.843 | S | 0.500 | 0.003  |
| SNA3 | 2007 | 202 | 13 | 44 | 45.161 | S | 0.500 | 0.121  |
| SNE5 | 2007 | 202 | 13 | 44 | 54.705 | S | 0.500 | -0.330 |
| SNE9 | 2007 | 202 | 13 | 44 | 52.554 | S | 0.500 | 0.241  |
| HAST | 2007 | 202 | 13 | 44 | 38.868 | S | 0.500 | 0.120  |
| N06A | 2007 | 202 | 13 | 44 | 54.013 | S | 0.500 | -0.299 |
| CMB  | 2007 | 202 | 13 | 44 | 40.220 | S | 0.500 | -0.099 |
| SNB3 | 2007 | 202 | 13 | 44 | 48.352 | S | 0.500 | 0.087  |

|      |      |     |    |    |        |   |       |        |
|------|------|-----|----|----|--------|---|-------|--------|
| SNE6 | 2007 | 202 | 13 | 44 | 53.262 | S | 0.500 | -0.187 |
| SND7 | 2007 | 202 | 13 | 44 | 52.678 | S | 0.500 | 0.127  |
| SNE7 | 2007 | 202 | 13 | 44 | 54.698 | S | 0.500 | -0.079 |
| ORV  | 2007 | 202 | 13 | 44 | 58.598 | S | 0.500 | 0.218  |
| SNE4 | 2007 | 202 | 13 | 44 | 55.370 | S | 0.500 | -0.003 |
| SN93 | 2007 | 202 | 13 | 44 | 42.935 | S | 0.500 | 0.373  |
| ADO  | 2007 | 202 | 13 | 43 | 52.222 | S | 0.500 | -0.516 |
| Q07A | 2007 | 202 | 13 | 44 | 34.798 | S | 0.500 | 0.372  |
| J07A | 2007 | 202 | 13 | 45 | 10.033 | S | 0.500 | 1.309  |
| J04A | 2007 | 202 | 13 | 45 | 26.581 | S | 0.500 | -0.447 |
| I04A | 2007 | 202 | 13 | 45 | 29.707 | S | 0.500 | -2.601 |
| M08A | 2007 | 202 | 13 | 44 | 47.757 | S | 0.500 | -1.003 |
| J03A | 2007 | 202 | 13 | 45 | 30.610 | S | 0.500 | -2.761 |
| R10A | 2007 | 202 | 13 | 44 | 11.871 | S | 0.500 | 1.022  |
| VES  | 2007 | 202 | 13 | 44 | 15.029 | S | 0.500 | -0.017 |
| U10A | 2007 | 202 | 13 | 43 | 57.793 | S | 0.500 | 0.559  |
| RCT  | 2007 | 202 | 13 | 44 | 17.378 | S | 0.500 | -2.153 |
| YBH  | 2007 | 202 | 13 | 45 | 18.083 | S | 0.500 | -3.474 |
| HUMO | 2007 | 202 | 13 | 45 | 25.214 | S | 0.500 | -3.451 |
| N07B | 2007 | 202 | 13 | 44 | 46.980 | S | 0.500 | -1.417 |
| U05C | 2007 | 202 | 13 | 44 | 25.594 | S | 0.500 | -1.140 |
| SCZ2 | 2007 | 202 | 13 | 44 | 6.361  | S | 0.500 | -0.926 |
| GASB | 2007 | 202 | 13 | 45 | 10.022 | S | 0.500 | 1.478  |
| I03A | 2007 | 202 | 13 | 45 | 37.228 | S | 0.500 | -2.078 |
| R08A | 2007 | 202 | 13 | 44 | 24.863 | S | 0.500 | -0.203 |
| I08A | 2007 | 202 | 13 | 45 | 7.745  | S | 0.500 | 0.267  |
| USC  | 2007 | 202 | 13 | 43 | 57.692 | S | 0.500 | 1.603  |
| OSI  | 2007 | 202 | 13 | 44 | 2.580  | S | 0.500 | -1.337 |
| M02C | 2007 | 202 | 13 | 45 | 17.352 | S | 0.500 | -3.147 |
| HATC | 2007 | 202 | 13 | 45 | 6.459  | S | 0.500 | -0.215 |
| O10A | 2007 | 202 | 13 | 44 | 25.976 | S | 0.500 | -1.253 |
| O09A | 2007 | 202 | 13 | 44 | 29.623 | S | 0.500 | -1.615 |
| DBO  | 2007 | 202 | 13 | 45 | 31.980 | S | 0.500 | -1.840 |
| SNB7 | 2007 | 202 | 13 | 44 | 46.233 | S | 0.500 | 0.640  |
| SMM  | 2007 | 202 | 13 | 44 | 19.283 | S | 0.500 | 0.180  |
| SDD  | 2007 | 202 | 13 | 43 | 48.942 | S | 0.500 | 1.344  |
| V05C | 2007 | 202 | 13 | 44 | 21.861 | S | 0.500 | -0.165 |
| P06A | 2007 | 202 | 13 | 44 | 48.221 | S | 0.500 | 0.471  |
| V03C | 2007 | 202 | 13 | 44 | 34.559 | S | 0.500 | 0.762  |
| SN87 | 2007 | 202 | 13 | 44 | 40.723 | S | 0.500 | 1.440  |
| M07A | 2007 | 202 | 13 | 44 | 52.958 | S | 0.500 | -1.124 |
| YO10 | 2007 | 202 | 13 | 44 | 32.760 | S | 0.500 | 0.570  |
| L07A | 2007 | 202 | 13 | 44 | 59.483 | S | 0.500 | -0.163 |
| J02A | 2007 | 202 | 13 | 45 | 36.791 | S | 0.500 | -0.623 |
| ELFS | 2007 | 202 | 13 | 45 | 0.487  | S | 0.500 | 0.272  |
| O08A | 2007 | 202 | 13 | 44 | 37.351 | S | 0.500 | -1.956 |
| T05C | 2007 | 202 | 13 | 44 | 34.959 | S | 0.500 | 0.156  |
| YO08 | 2007 | 202 | 13 | 44 | 33.394 | S | 0.500 | 0.777  |
| N08A | 2007 | 202 | 13 | 44 | 40.357 | S | 0.500 | -2.109 |
| MPP  | 2007 | 202 | 13 | 44 | 14.400 | S | 0.500 | -0.591 |
| I09A | 2007 | 202 | 13 | 45 | 1.816  | S | 0.500 | -0.665 |
| WVOR | 2007 | 202 | 13 | 44 | 56.600 | S | 0.500 | -1.065 |
| YO09 | 2007 | 202 | 13 | 44 | 33.207 | S | 0.500 | 0.806  |
| PLM  | 2007 | 202 | 13 | 43 | 40.632 | S | 0.500 | 0.874  |
| YO07 | 2007 | 202 | 13 | 44 | 33.560 | S | 0.500 | 0.519  |
| J05A | 2007 | 202 | 13 | 45 | 22.620 | S | 0.500 | 1.149  |
| YO11 | 2007 | 202 | 13 | 44 | 32.803 | S | 0.500 | 0.705  |
| ARV  | 2007 | 202 | 13 | 44 | 7.521  | S | 0.500 | -0.536 |
| M06C | 2007 | 202 | 13 | 45 | 2.119  | S | 0.500 | 0.082  |
| RRX  | 2007 | 202 | 13 | 43 | 51.151 | S | 0.500 | -0.340 |
| LGU  | 2007 | 202 | 13 | 44 | 3.035  | S | 0.500 | -0.195 |
| S10A | 2007 | 202 | 13 | 44 | 10.474 | S | 0.500 | 0.044  |
| MOD  | 2007 | 202 | 13 | 45 | 5.707  | S | 0.500 | 0.156  |

|      |      |     |    |    |        |   |       |        |
|------|------|-----|----|----|--------|---|-------|--------|
| GRA  | 2007 | 202 | 13 | 44 | 10.505 | S | 0.500 | 0.913  |
| PKD  | 2007 | 202 | 13 | 44 | 27.198 | S | 0.500 | -0.491 |
| SN98 | 2007 | 202 | 13 | 44 | 39.974 | S | 0.500 | 0.903  |
| HOPS | 2007 | 202 | 13 | 45 | 9.016  | S | 0.500 | 2.224  |
| YO02 | 2007 | 202 | 13 | 44 | 34.108 | S | 0.500 | 0.011  |
| ISA  | 2007 | 202 | 13 | 44 | 9.771  | S | 0.500 | 0.612  |
| EDW2 | 2007 | 202 | 13 | 43 | 58.161 | S | 0.500 | -1.605 |
| PIN  | 2007 | 202 | 13 | 45 | 23.843 | S | 0.500 | 1.384  |
| MNRC | 2007 | 202 | 13 | 45 | 3.008  | S | 0.500 | 1.647  |
| SN55 | 2007 | 202 | 13 | 44 | 32.400 | S | 0.500 | 0.839  |
| MCCM | 2007 | 202 | 13 | 45 | 0.205  | S | 0.500 | 0.113  |
| TPNV | 2007 | 202 | 13 | 44 | 1.029  | S | 0.500 | 0.467  |
| YO05 | 2007 | 202 | 13 | 44 | 34.426 | S | 0.500 | 0.546  |
| SNG7 | 2007 | 202 | 13 | 44 | 59.155 | S | 0.500 | -0.758 |
| SNB6 | 2007 | 202 | 13 | 44 | 45.985 | S | 0.500 | 0.676  |
| DEC  | 2007 | 202 | 13 | 43 | 57.808 | S | 0.500 | -0.298 |
| SN63 | 2007 | 202 | 13 | 44 | 33.893 | S | 0.500 | -0.063 |
| YO01 | 2007 | 202 | 13 | 44 | 34.054 | S | 0.500 | 0.122  |
| VTV  | 2007 | 202 | 13 | 43 | 50.984 | S | 0.500 | -1.072 |
| V04C | 2007 | 202 | 13 | 44 | 28.492 | S | 0.500 | 0.040  |
| YO06 | 2007 | 202 | 13 | 44 | 34.028 | S | 0.500 | 0.530  |
| SN97 | 2007 | 202 | 13 | 44 | 42.511 | S | 0.500 | 1.186  |
| L02A | 2007 | 202 | 13 | 45 | 29.008 | S | 0.500 | -1.390 |
| WENL | 2007 | 202 | 13 | 44 | 49.908 | S | 0.500 | 1.900  |
| N02C | 2007 | 202 | 13 | 45 | 18.291 | S | 0.500 | -1.935 |
| N09A | 2007 | 202 | 13 | 44 | 36.638 | S | 0.500 | -1.927 |
| RPV  | 2007 | 202 | 13 | 43 | 55.982 | S | 0.500 | 0.844  |
| PHL  | 2007 | 202 | 13 | 44 | 23.902 | S | 0.500 | -0.373 |
| SVD  | 2007 | 202 | 13 | 43 | 47.382 | S | 0.500 | 0.667  |
| FMP  | 2007 | 202 | 13 | 43 | 54.739 | S | 0.500 | 0.631  |
| U04C | 2007 | 202 | 13 | 44 | 31.881 | S | 0.500 | -0.417 |
| BBR  | 2007 | 202 | 13 | 43 | 46.923 | S | 0.500 | 0.245  |
| M05C | 2007 | 202 | 13 | 45 | 7.922  | S | 0.500 | 0.003  |
| SLA  | 2007 | 202 | 13 | 44 | 1.659  | S | 0.500 | 0.589  |
| YO03 | 2007 | 202 | 13 | 44 | 34.118 | S | 0.500 | 0.163  |
| R09A | 2007 | 202 | 13 | 44 | 16.405 | S | 0.500 | -0.036 |
| SND9 | 2007 | 202 | 13 | 44 | 50.044 | S | 0.500 | 0.448  |
| SNA7 | 2007 | 202 | 13 | 44 | 44.485 | S | 0.500 | 1.026  |
| FUR  | 2007 | 202 | 13 | 44 | 2.238  | S | 0.500 | 0.654  |
| HELL | 2007 | 202 | 13 | 44 | 19.190 | S | 0.500 | -1.246 |
| DJJ  | 2007 | 202 | 13 | 43 | 58.504 | S | 0.500 | 0.306  |
| SUTB | 2007 | 202 | 13 | 44 | 59.328 | S | 0.500 | 0.700  |
| FARB | 2007 | 202 | 13 | 44 | 58.168 | S | 0.500 | -0.259 |
| K09A | 2007 | 202 | 13 | 44 | 53.054 | S | 0.500 | -0.077 |
| SN64 | 2007 | 202 | 13 | 44 | 34.226 | S | 0.500 | 0.484  |

|      |     |    |    |        |           |           |          |
|------|-----|----|----|--------|-----------|-----------|----------|
| 2007 | 202 | 15 | 35 | 1.6114 | -22.15100 | -65.77700 | 289.5000 |
|------|-----|----|----|--------|-----------|-----------|----------|

38

9.011

|      |      |     |    |    |        |   |       |        |
|------|------|-----|----|----|--------|---|-------|--------|
| YO09 | 2007 | 202 | 15 | 56 | 0.008  | S | 0.500 | 0.243  |
| P08A | 2007 | 202 | 15 | 56 | 3.036  | S | 0.500 | -0.317 |
| L02A | 2007 | 202 | 15 | 56 | 50.819 | S | 0.500 | 1.843  |
| Q07A | 2007 | 202 | 15 | 56 | 3.230  | S | 0.500 | 0.572  |
| J05A | 2007 | 202 | 15 | 56 | 46.339 | S | 0.500 | 1.292  |
| SN87 | 2007 | 202 | 15 | 56 | 7.511  | S | 0.500 | 0.995  |
| T05C | 2007 | 202 | 15 | 56 | 0.594  | S | 0.500 | 0.103  |
| HATC | 2007 | 202 | 15 | 56 | 29.788 | S | 0.500 | -1.550 |
| BAK  | 2007 | 202 | 15 | 55 | 40.160 | S | 0.500 | 0.478  |
| O03C | 2007 | 202 | 15 | 56 | 26.515 | S | 0.500 | -2.800 |
| M08A | 2007 | 202 | 15 | 56 | 16.625 | S | 0.500 | -0.522 |
| P07A | 2007 | 202 | 15 | 56 | 7.527  | S | 0.500 | 0.374  |
| R10A | 2007 | 202 | 15 | 55 | 43.699 | S | 0.500 | 1.265  |
| HUMO | 2007 | 202 | 15 | 56 | 47.844 | S | 0.500 | -0.476 |
| P10A | 2007 | 202 | 15 | 55 | 53.065 | S | 0.500 | -0.059 |
| ADO  | 2007 | 202 | 15 | 55 | 22.678 | S | 0.500 | -0.063 |

|      |      |     |    |    |        |   |       |        |
|------|------|-----|----|----|--------|---|-------|--------|
| TPH  | 2007 | 202 | 15 | 55 | 46.989 | S | 0.500 | 0.272  |
| ELFS | 2007 | 202 | 15 | 56 | 24.872 | S | 0.500 | -0.977 |
| PIN  | 2007 | 202 | 15 | 56 | 48.235 | S | 0.500 | 2.295  |
| TIN  | 2007 | 202 | 15 | 55 | 46.484 | S | 0.500 | 0.665  |
| YO10 | 2007 | 202 | 15 | 55 | 59.742 | S | 0.500 | 0.067  |
| VES  | 2007 | 202 | 15 | 55 | 42.383 | S | 0.500 | -0.538 |
| SN97 | 2007 | 202 | 15 | 56 | 9.186  | S | 0.500 | 0.923  |
| SUTB | 2007 | 202 | 15 | 56 | 22.068 | S | 0.500 | -0.874 |
| R08A | 2007 | 202 | 15 | 55 | 54.764 | S | 0.500 | 0.423  |
| SDD  | 2007 | 202 | 15 | 55 | 18.333 | S | 0.500 | 1.270  |
| USC  | 2007 | 202 | 15 | 55 | 26.107 | S | 0.500 | 1.314  |
| SN64 | 2007 | 202 | 15 | 56 | 0.828  | S | 0.500 | -0.092 |
| RCT  | 2007 | 202 | 15 | 55 | 44.606 | S | 0.500 | -2.615 |
| YO06 | 2007 | 202 | 15 | 56 | 0.625  | S | 0.500 | -0.110 |
| YO04 | 2007 | 202 | 15 | 56 | 0.774  | S | 0.500 | -0.176 |
| MNRC | 2007 | 202 | 15 | 56 | 25.312 | S | 0.500 | 0.529  |
| YO08 | 2007 | 202 | 15 | 56 | 0.084  | S | 0.500 | 0.172  |
| SNC6 | 2007 | 202 | 15 | 56 | 13.763 | S | 0.500 | -0.379 |
| SBC  | 2007 | 202 | 15 | 55 | 37.200 | S | 0.500 | -0.244 |
| SNA7 | 2007 | 202 | 15 | 56 | 11.084 | S | 0.500 | 0.757  |
| YO07 | 2007 | 202 | 15 | 56 | 0.203  | S | 0.500 | -0.148 |
| LAVA | 2007 | 202 | 15 | 56 | 12.551 | S | 0.500 | -0.888 |
| V03C | 2007 | 202 | 15 | 55 | 58.580 | S | 0.500 | 0.040  |
| SCZ2 | 2007 | 202 | 15 | 55 | 32.924 | S | 0.500 | -0.971 |
| GASB | 2007 | 202 | 15 | 56 | 31.028 | S | 0.500 | -0.580 |
| YO02 | 2007 | 202 | 15 | 56 | 0.459  | S | 0.500 | -0.702 |
| J10A | 2007 | 202 | 15 | 56 | 22.587 | S | 0.500 | 0.989  |
| J08A | 2007 | 202 | 15 | 56 | 32.776 | S | 0.500 | 2.002  |
| YO11 | 2007 | 202 | 15 | 55 | 59.936 | S | 0.500 | 0.290  |
| YO03 | 2007 | 202 | 15 | 56 | 0.504  | S | 0.500 | -0.554 |
| SN63 | 2007 | 202 | 15 | 56 | 0.177  | S | 0.500 | -0.736 |
| Q10A | 2007 | 202 | 15 | 55 | 47.758 | S | 0.500 | 0.755  |
| ARV  | 2007 | 202 | 15 | 55 | 36.042 | S | 0.500 | -0.028 |
| HELL | 2007 | 202 | 15 | 55 | 46.856 | S | 0.500 | -1.545 |
| CVS  | 2007 | 202 | 15 | 56 | 20.758 | S | 0.500 | -0.805 |
| SNC5 | 2007 | 202 | 15 | 56 | 14.542 | S | 0.500 | -0.888 |
| LGU  | 2007 | 202 | 15 | 55 | 30.618 | S | 0.500 | -0.120 |
| YO01 | 2007 | 202 | 15 | 56 | 0.320  | S | 0.500 | -0.604 |
| I04A | 2007 | 202 | 15 | 56 | 53.193 | S | 0.500 | 2.336  |
| SND5 | 2007 | 202 | 15 | 56 | 16.394 | S | 0.500 | -0.993 |
| N02C | 2007 | 202 | 15 | 56 | 39.992 | S | 0.500 | -2.404 |
| MCCM | 2007 | 202 | 15 | 56 | 21.465 | S | 0.500 | -1.361 |
| SNF8 | 2007 | 202 | 15 | 56 | 20.403 | S | 0.500 | -1.034 |
| N09A | 2007 | 202 | 15 | 56 | 7.194  | S | 0.500 | -0.931 |
| GRA  | 2007 | 202 | 15 | 55 | 41.159 | S | 0.500 | 1.322  |
| WENL | 2007 | 202 | 15 | 56 | 12.913 | S | 0.500 | 0.696  |
| SNE5 | 2007 | 202 | 15 | 56 | 18.667 | S | 0.500 | -1.500 |
| P06A | 2007 | 202 | 15 | 56 | 14.819 | S | 0.500 | 0.255  |
| KCC  | 2007 | 202 | 15 | 55 | 53.320 | S | 0.500 | -1.566 |
| V04C | 2007 | 202 | 15 | 55 | 53.316 | S | 0.500 | -0.421 |
| SLA  | 2007 | 202 | 15 | 55 | 32.659 | S | 0.500 | 1.251  |
| SND4 | 2007 | 202 | 15 | 56 | 16.743 | S | 0.500 | -1.084 |
| T06C | 2007 | 202 | 15 | 55 | 51.720 | S | 0.500 | -3.225 |
| SN55 | 2007 | 202 | 15 | 55 | 59.679 | S | 0.500 | 0.513  |
| K05A | 2007 | 202 | 15 | 56 | 41.273 | S | 0.500 | 0.695  |
| SMM  | 2007 | 202 | 15 | 55 | 45.706 | S | 0.500 | 0.182  |
| L07A | 2007 | 202 | 15 | 56 | 27.546 | S | 0.500 | 0.809  |
| PKD  | 2007 | 202 | 15 | 55 | 52.845 | S | 0.500 | -0.660 |
| I09A | 2007 | 202 | 15 | 56 | 32.174 | S | 0.500 | 1.336  |
| BMN  | 2007 | 202 | 15 | 56 | 1.588  | S | 0.500 | -1.708 |
| WCN  | 2007 | 202 | 15 | 56 | 12.236 | S | 0.500 | 0.995  |
| K06A | 2007 | 202 | 15 | 56 | 38.565 | S | 0.500 | 1.431  |
| SNC7 | 2007 | 202 | 15 | 56 | 14.986 | S | 0.500 | -0.383 |

|      |      |     |    |    |        |   |       |        |
|------|------|-----|----|----|--------|---|-------|--------|
| SN96 | 2007 | 202 | 15 | 56 | 7.960  | S | 0.500 | 0.451  |
| O02C | 2007 | 202 | 15 | 56 | 32.256 | S | 0.500 | -2.981 |
| BNLO | 2007 | 202 | 15 | 56 | 11.071 | S | 0.500 | -1.190 |
| FARB | 2007 | 202 | 15 | 56 | 19.411 | S | 0.500 | -1.573 |
| SNB3 | 2007 | 202 | 15 | 56 | 13.099 | S | 0.500 | -0.518 |
| DEC  | 2007 | 202 | 15 | 55 | 26.549 | S | 0.500 | -0.176 |
| JRSC | 2007 | 202 | 15 | 56 | 13.308 | S | 0.500 | -0.660 |
| SNE4 | 2007 | 202 | 15 | 56 | 19.292 | S | 0.500 | -1.013 |
| N08A | 2007 | 202 | 15 | 56 | 10.578 | S | 0.500 | -0.760 |
| S10A | 2007 | 202 | 15 | 55 | 42.460 | S | 0.500 | 0.791  |
| SND7 | 2007 | 202 | 15 | 56 | 17.849 | S | 0.500 | -0.621 |
| FUR  | 2007 | 202 | 15 | 55 | 33.935 | S | 0.500 | 1.434  |
| I03A | 2007 | 202 | 15 | 56 | 59.348 | S | 0.500 | 4.576  |
| BDM  | 2007 | 202 | 15 | 56 | 15.665 | S | 0.500 | 0.383  |
| U10A | 2007 | 202 | 15 | 55 | 30.275 | S | 0.500 | 1.298  |
| MPP  | 2007 | 202 | 15 | 55 | 41.055 | S | 0.500 | -0.515 |
| SNE6 | 2007 | 202 | 15 | 56 | 17.788 | S | 0.500 | -1.209 |
| OSI  | 2007 | 202 | 15 | 55 | 31.370 | S | 0.500 | -0.676 |
| SNG7 | 2007 | 202 | 15 | 56 | 23.267 | S | 0.500 | -1.722 |
| MOD  | 2007 | 202 | 15 | 56 | 31.620 | S | 0.500 | 0.138  |
| SNA4 | 2007 | 202 | 15 | 56 | 10.184 | S | 0.500 | -0.408 |
| SND8 | 2007 | 202 | 15 | 56 | 16.171 | S | 0.500 | -0.212 |
| MPM  | 2007 | 202 | 15 | 55 | 35.517 | S | 0.500 | 1.276  |
| PASC | 2007 | 202 | 15 | 55 | 25.194 | S | 0.500 | -0.011 |
| S09A | 2007 | 202 | 15 | 55 | 45.136 | S | 0.500 | 0.964  |
| R05C | 2007 | 202 | 15 | 56 | 9.651  | S | 0.500 | 0.164  |
| U04C | 2007 | 202 | 15 | 55 | 57.448 | S | 0.500 | -0.291 |
| FMP  | 2007 | 202 | 15 | 55 | 23.426 | S | 0.500 | 0.698  |
| R09A | 2007 | 202 | 15 | 55 | 47.480 | S | 0.500 | 0.445  |
| SNB9 | 2007 | 202 | 15 | 56 | 11.190 | S | 0.500 | 0.428  |
| ISA  | 2007 | 202 | 15 | 55 | 38.822 | S | 0.500 | 1.016  |
| CIA  | 2007 | 202 | 15 | 55 | 21.711 | S | 0.500 | 0.448  |
| PACP | 2007 | 202 | 15 | 56 | 5.144  | S | 0.500 | -0.306 |
| TPNV | 2007 | 202 | 15 | 55 | 33.701 | S | 0.500 | 1.393  |
| R04C | 2007 | 202 | 15 | 56 | 11.141 | S | 0.500 | 0.003  |
| CWC  | 2007 | 202 | 15 | 55 | 41.518 | S | 0.500 | 0.779  |
| RPV  | 2007 | 202 | 15 | 55 | 24.362 | S | 0.500 | 0.806  |
| RRX  | 2007 | 202 | 15 | 55 | 22.528 | S | 0.500 | 0.324  |
| SNA3 | 2007 | 202 | 15 | 56 | 10.435 | S | 0.500 | -0.393 |
| K09A | 2007 | 202 | 15 | 56 | 22.694 | S | 0.500 | 0.738  |
| SHO  | 2007 | 202 | 15 | 55 | 25.692 | S | 0.500 | 1.141  |
| N07B | 2007 | 202 | 15 | 56 | 15.509 | S | 0.500 | -0.689 |
| P09A | 2007 | 202 | 15 | 55 | 55.842 | S | 0.500 | -0.983 |
| PHL  | 2007 | 202 | 15 | 55 | 49.399 | S | 0.500 | -0.587 |
| DGR  | 2007 | 202 | 15 | 55 | 14.911 | S | 0.500 | 1.514  |
| J09A | 2007 | 202 | 15 | 56 | 28.034 | S | 0.500 | 1.410  |
| CMB  | 2007 | 202 | 15 | 56 | 6.124  | S | 0.500 | -0.413 |
| MWC  | 2007 | 202 | 15 | 55 | 24.844 | S | 0.500 | -0.001 |
| HAST | 2007 | 202 | 15 | 56 | 2.752  | S | 0.500 | -0.391 |
| K11A | 2007 | 202 | 15 | 56 | 14.837 | S | 0.500 | 1.777  |
| PLM  | 2007 | 202 | 15 | 55 | 11.872 | S | 0.500 | 1.485  |
| EDW2 | 2007 | 202 | 15 | 55 | 28.102 | S | 0.500 | -0.890 |
| SNF9 | 2007 | 202 | 15 | 56 | 20.300 | S | 0.500 | -0.668 |
| SN93 | 2007 | 202 | 15 | 56 | 8.396  | S | 0.500 | -0.009 |
| SNE7 | 2007 | 202 | 15 | 56 | 19.528 | S | 0.500 | -1.004 |
| LRL  | 2007 | 202 | 15 | 55 | 32.241 | S | 0.500 | 1.082  |
| DJJ  | 2007 | 202 | 15 | 55 | 26.988 | S | 0.500 | 0.326  |
| BEK  | 2007 | 202 | 15 | 56 | 18.135 | S | 0.500 | -0.375 |
| SVD  | 2007 | 202 | 15 | 55 | 18.461 | S | 0.500 | 1.322  |
| SND9 | 2007 | 202 | 15 | 56 | 16.285 | S | 0.500 | 0.088  |
| MUR  | 2007 | 202 | 15 | 55 | 15.538 | S | 0.500 | 1.241  |
| JCS  | 2007 | 202 | 15 | 55 | 7.286  | S | 0.500 | 0.967  |
| VTV  | 2007 | 202 | 15 | 55 | 21.893 | S | 0.500 | -0.331 |



|      |      |     |    |    |        |   |       |        |
|------|------|-----|----|----|--------|---|-------|--------|
| SNG5 | 2007 | 202 | 15 | 56 | 22.840 | S | 0.500 | -1.845 |
| BBR  | 2007 | 202 | 15 | 55 | 18.534 | S | 0.500 | 1.150  |
| L10A | 2007 | 202 | 15 | 56 | 11.670 | S | 0.500 | 0.996  |
| SNF6 | 2007 | 202 | 15 | 56 | 20.180 | S | 0.500 | -1.775 |
| GSC  | 2007 | 202 | 15 | 55 | 25.061 | S | 0.500 | 0.967  |
| N06A | 2007 | 202 | 15 | 56 | 21.163 | S | 0.500 | 0.143  |
| CHF  | 2007 | 202 | 15 | 55 | 25.457 | S | 0.500 | 0.123  |
| SNE9 | 2007 | 202 | 15 | 56 | 18.346 | S | 0.500 | -0.331 |
| K10A | 2007 | 202 | 15 | 56 | 18.928 | S | 0.500 | 1.059  |
| BFS  | 2007 | 202 | 15 | 55 | 22.811 | S | 0.500 | 0.545  |
| HEC  | 2007 | 202 | 15 | 55 | 18.286 | S | 0.500 | 0.880  |

|      |      |     |    |        |           |           |         |        |       |
|------|------|-----|----|--------|-----------|-----------|---------|--------|-------|
| 2007 | 227  | 23  | 41 | 3.5700 | -13.38600 | -76.60300 | 39.0000 | 39     | 5.680 |
| HUMO | 2007 | 228 | 0  | 1      | 16.861    | S         | 0.500   | -3.379 |       |
| I09A | 2007 | 228 | 0  | 0      | 57.835    | S         | 0.500   | -1.217 |       |
| DGR  | 2007 | 227 | 23 | 59     | 26.182    | S         | 0.500   | 1.914  |       |
| BFS  | 2007 | 227 | 23 | 59     | 35.260    | S         | 0.500   | 0.746  |       |
| M02C | 2007 | 228 | 0  | 1      | 7.482     | S         | 0.500   | -2.889 |       |
| GSC  | 2007 | 227 | 23 | 59     | 38.273    | S         | 0.500   | 0.972  |       |
| PASC | 2007 | 227 | 23 | 59     | 38.399    | S         | 0.500   | 0.650  |       |
| EDW2 | 2007 | 227 | 23 | 59     | 41.573    | S         | 0.500   | -0.911 |       |
| MPP  | 2007 | 227 | 23 | 59     | 56.120    | S         | 0.500   | -0.408 |       |
| RPV  | 2007 | 227 | 23 | 59     | 37.063    | S         | 0.500   | 1.394  |       |
| VTV  | 2007 | 227 | 23 | 59     | 34.533    | S         | 0.500   | -0.175 |       |
| TPH  | 2007 | 228 | 0  | 0      | 4.299     | S         | 0.500   | -0.386 |       |
| CWC  | 2007 | 227 | 23 | 59     | 57.991    | S         | 0.500   | 1.334  |       |
| J08A | 2007 | 228 | 0  | 0      | 58.685    | S         | 0.500   | 0.389  |       |
| DBO  | 2007 | 228 | 0  | 1      | 23.080    | S         | 0.500   | -2.904 |       |
| MLAC | 2007 | 228 | 0  | 0      | 13.206    | S         | 0.500   | 0.899  |       |
| RRX  | 2007 | 227 | 23 | 59     | 35.210    | S         | 0.500   | 0.299  |       |
| PKD  | 2007 | 228 | 0  | 0      | 10.293    | S         | 0.500   | -0.256 |       |
| SMM  | 2007 | 228 | 0  | 0      | 1.539     | S         | 0.500   | 0.310  |       |
| HOPS | 2007 | 228 | 0  | 0      | 54.898    | S         | 0.500   | 1.919  |       |
| MUR  | 2007 | 227 | 23 | 59     | 26.826    | S         | 0.500   | 1.628  |       |
| SVD  | 2007 | 227 | 23 | 59     | 30.539    | S         | 0.500   | 1.762  |       |
| BBR  | 2007 | 227 | 23 | 59     | 30.769    | S         | 0.500   | 1.650  |       |
| DJJ  | 2007 | 227 | 23 | 59     | 40.211    | S         | 0.500   | 0.877  |       |
| VCS  | 2007 | 227 | 23 | 59     | 39.576    | S         | 0.500   | -0.510 |       |
| ARV  | 2007 | 227 | 23 | 59     | 50.371    | S         | 0.500   | -0.231 |       |
| LRL  | 2007 | 227 | 23 | 59     | 46.145    | S         | 0.500   | 0.806  |       |
| V03C | 2007 | 228 | 0  | 0      | 16.561    | S         | 0.500   | 0.248  |       |
| V05C | 2007 | 228 | 0  | 0      | 5.225     | S         | 0.500   | 0.113  |       |
| RCT  | 2007 | 228 | 0  | 0      | 1.970     | S         | 0.500   | -1.775 |       |
| HEC  | 2007 | 227 | 23 | 59     | 30.286    | S         | 0.500   | 0.704  |       |
| P07A | 2007 | 228 | 0  | 0      | 28.307    | S         | 0.500   | -0.257 |       |
| O09A | 2007 | 228 | 0  | 0      | 21.100    | S         | 0.500   | -1.725 |       |
| VES  | 2007 | 227 | 23 | 59     | 58.676    | S         | 0.500   | 0.016  |       |
| PIN  | 2007 | 228 | 0  | 1      | 17.218    | S         | 0.500   | 0.286  |       |
| FUR  | 2007 | 227 | 23 | 59     | 48.876    | S         | 0.500   | 1.194  |       |
| HATC | 2007 | 228 | 0  | 0      | 55.523    | S         | 0.500   | -0.935 |       |
| V04C | 2007 | 228 | 0  | 0      | 10.737    | S         | 0.500   | 0.167  |       |
| YO10 | 2007 | 228 | 0  | 0      | 18.325    | S         | 0.500   | -0.439 |       |
| WVOR | 2007 | 228 | 0  | 0      | 51.017    | S         | 0.500   | -0.493 |       |
| U10A | 2007 | 227 | 23 | 59     | 44.697    | S         | 0.500   | 1.044  |       |
| GRA  | 2007 | 227 | 23 | 59     | 57.122    | S         | 0.500   | 0.953  |       |
| R07C | 2007 | 228 | 0  | 0      | 18.984    | S         | 0.500   | 1.373  |       |
| K05A | 2007 | 228 | 0  | 1      | 8.654     | S         | 0.500   | 0.249  |       |
| MCCM | 2007 | 228 | 0  | 0      | 44.885    | S         | 0.500   | -0.164 |       |
| MPM  | 2007 | 227 | 23 | 59     | 50.682    | S         | 0.500   | 1.523  |       |
| GASB | 2007 | 228 | 0  | 0      | 56.451    | S         | 0.500   | 0.550  |       |
| L02A | 2007 | 228 | 0  | 1      | 19.399    | S         | 0.500   | -1.585 |       |
| R10A | 2007 | 228 | 0  | 0      | 0.663     | S         | 0.500   | 0.451  |       |
| ISA  | 2007 | 227 | 23 | 59     | 54.036    | S         | 0.500   | 1.210  |       |

|      |      |     |    |    |        |   |       |        |
|------|------|-----|----|----|--------|---|-------|--------|
| BDM  | 2007 | 228 | 0  | 0  | 37.531 | S | 0.500 | 1.164  |
| PHL  | 2007 | 228 | 0  | 0  | 6.271  | S | 0.500 | 0.059  |
| SNG7 | 2007 | 228 | 0  | 0  | 48.041 | S | 0.500 | -0.807 |
| Q07A | 2007 | 228 | 0  | 0  | 23.290 | S | 0.500 | 0.246  |
| P10A | 2007 | 228 | 0  | 0  | 12.448 | S | 0.500 | -0.769 |
| I08A | 2007 | 228 | 0  | 1  | 3.098  | S | 0.500 | -0.351 |
| SN63 | 2007 | 228 | 0  | 0  | 19.319 | S | 0.500 | -0.762 |
| YO05 | 2007 | 228 | 0  | 0  | 20.057 | S | 0.500 | -0.197 |
| L08A | 2007 | 228 | 0  | 0  | 45.671 | S | 0.500 | -1.931 |
| YO01 | 2007 | 228 | 0  | 0  | 19.439 | S | 0.500 | -0.683 |
| YO02 | 2007 | 228 | 0  | 0  | 19.593 | S | 0.500 | -0.710 |
| YO03 | 2007 | 228 | 0  | 0  | 19.694 | S | 0.500 | -0.524 |
| U04C | 2007 | 228 | 0  | 0  | 15.501 | S | 0.500 | -0.132 |
| SN98 | 2007 | 228 | 0  | 0  | 28.640 | S | 0.500 | 1.351  |
| M08A | 2007 | 228 | 0  | 0  | 39.691 | S | 0.500 | -1.679 |
| TPNV | 2007 | 227 | 23 | 59 | 48.781 | S | 0.500 | 0.925  |
| MNRC | 2007 | 228 | 0  | 0  | 49.109 | S | 0.500 | 1.393  |
| YO04 | 2007 | 228 | 0  | 0  | 19.946 | S | 0.500 | -0.252 |
| Q09A | 2007 | 228 | 0  | 0  | 10.749 | S | 0.500 | -0.389 |
| ELFS | 2007 | 228 | 0  | 0  | 49.441 | S | 0.500 | -0.708 |
| L07A | 2007 | 228 | 0  | 0  | 52.217 | S | 0.500 | -0.255 |
| S08C | 2007 | 228 | 0  | 0  | 7.690  | S | 0.500 | 0.963  |
| HAST | 2007 | 228 | 0  | 0  | 21.776 | S | 0.500 | 0.077  |
| SNC3 | 2007 | 228 | 0  | 0  | 37.784 | S | 0.500 | 0.209  |
| M07A | 2007 | 228 | 0  | 0  | 44.995 | S | 0.500 | -1.123 |
| SN97 | 2007 | 228 | 0  | 0  | 30.615 | S | 0.500 | 1.502  |
| JRSC | 2007 | 228 | 0  | 0  | 35.071 | S | 0.500 | 0.511  |
| SND4 | 2007 | 228 | 0  | 0  | 40.155 | S | 0.500 | 0.150  |
| HELL | 2007 | 228 | 0  | 0  | 4.227  | S | 0.500 | -1.179 |
| M10A | 2007 | 228 | 0  | 0  | 29.661 | S | 0.500 | -0.922 |
| K11A | 2007 | 228 | 0  | 0  | 38.006 | S | 0.500 | -0.380 |
| O08A | 2007 | 228 | 0  | 0  | 28.598 | S | 0.500 | -1.783 |
| SND5 | 2007 | 228 | 0  | 0  | 39.522 | S | 0.500 | -0.114 |
| M09A | 2007 | 228 | 0  | 0  | 33.837 | S | 0.500 | -1.441 |
| O10A | 2007 | 228 | 0  | 0  | 17.817 | S | 0.500 | -1.658 |
| Q08A | 2007 | 228 | 0  | 0  | 16.205 | S | 0.500 | -0.075 |
| N10A | 2007 | 228 | 0  | 0  | 21.770 | S | 0.500 | -1.524 |
| CVS  | 2007 | 228 | 0  | 0  | 43.776 | S | 0.500 | 0.089  |
| YBH  | 2007 | 228 | 0  | 1  | 9.135  | S | 0.500 | -2.871 |
| SUTB | 2007 | 228 | 0  | 0  | 45.733 | S | 0.500 | -0.102 |
| J07A | 2007 | 228 | 0  | 1  | 4.387  | S | 0.500 | 0.889  |
| SNE5 | 2007 | 228 | 0  | 0  | 42.206 | S | 0.500 | -0.670 |
| SN93 | 2007 | 228 | 0  | 0  | 29.136 | S | 0.500 | 0.304  |
| SN64 | 2007 | 228 | 0  | 0  | 19.975 | S | 0.500 | -0.222 |
| S06C | 2007 | 228 | 0  | 0  | 20.843 | S | 0.500 | -0.695 |
| SNG5 | 2007 | 228 | 0  | 0  | 47.063 | S | 0.500 | -1.098 |
| YO06 | 2007 | 228 | 0  | 0  | 19.726 | S | 0.500 | -0.222 |
| YO11 | 2007 | 228 | 0  | 0  | 18.932 | S | 0.500 | 0.232  |
| P09A | 2007 | 228 | 0  | 0  | 15.784 | S | 0.500 | -1.375 |
| P06A | 2007 | 228 | 0  | 0  | 37.333 | S | 0.500 | 0.544  |
| MOD  | 2007 | 228 | 0  | 0  | 57.333 | S | 0.500 | -0.285 |
| SNF6 | 2007 | 228 | 0  | 0  | 44.029 | S | 0.500 | -1.000 |
| CMB  | 2007 | 228 | 0  | 0  | 26.371 | S | 0.500 | -0.210 |
| SN55 | 2007 | 228 | 0  | 0  | 18.673 | S | 0.500 | 0.482  |
| SNA3 | 2007 | 228 | 0  | 0  | 31.953 | S | 0.500 | 0.311  |
| SNC5 | 2007 | 228 | 0  | 0  | 37.534 | S | 0.500 | 0.258  |
| O07A | 2007 | 228 | 0  | 0  | 33.002 | S | 0.500 | -0.804 |
| YO09 | 2007 | 228 | 0  | 0  | 18.872 | S | 0.500 | 0.017  |
| SNF8 | 2007 | 228 | 0  | 0  | 43.951 | S | 0.500 | -0.774 |
| SNB9 | 2007 | 228 | 0  | 0  | 32.991 | S | 0.500 | 0.699  |
| J06A | 2007 | 228 | 0  | 1  | 8.233  | S | 0.500 | 0.561  |
| R06C | 2007 | 228 | 0  | 0  | 25.758 | S | 0.500 | 1.573  |
| SNF9 | 2007 | 228 | 0  | 0  | 43.699 | S | 0.500 | -0.663 |

|      |      |     |    |    |        |   |       |        |
|------|------|-----|----|----|--------|---|-------|--------|
| YO08 | 2007 | 228 | 0  | 0  | 19.067 | S | 0.500 | 0.049  |
| WCN  | 2007 | 228 | 0  | 0  | 33.972 | S | 0.500 | 1.152  |
| ORV  | 2007 | 228 | 0  | 0  | 46.060 | S | 0.500 | -0.229 |
| YO07 | 2007 | 228 | 0  | 0  | 19.272 | S | 0.500 | -0.189 |
| FARB | 2007 | 228 | 0  | 0  | 42.037 | S | 0.500 | -0.592 |
| I06A | 2007 | 228 | 0  | 1  | 14.324 | S | 0.500 | 0.541  |
| SNB3 | 2007 | 228 | 0  | 0  | 35.352 | S | 0.500 | 0.438  |
| SNC6 | 2007 | 228 | 0  | 0  | 36.393 | S | 0.500 | 0.481  |
| SNB7 | 2007 | 228 | 0  | 0  | 34.239 | S | 0.500 | 0.707  |
| SNB6 | 2007 | 228 | 0  | 0  | 33.567 | S | 0.500 | 0.630  |
| N06A | 2007 | 228 | 0  | 0  | 44.552 | S | 0.500 | -0.423 |
| SNE7 | 2007 | 228 | 0  | 0  | 42.900 | S | 0.500 | -0.613 |
| SNE9 | 2007 | 228 | 0  | 0  | 41.655 | S | 0.500 | -0.019 |
| N07B | 2007 | 228 | 0  | 0  | 38.360 | S | 0.500 | -1.295 |
| SN87 | 2007 | 228 | 0  | 0  | 28.305 | S | 0.500 | 1.318  |
| SNE6 | 2007 | 228 | 0  | 0  | 41.045 | S | 0.500 | -0.556 |
| K10A | 2007 | 228 | 0  | 0  | 42.689 | S | 0.500 | -0.907 |
| PACP | 2007 | 228 | 0  | 0  | 24.700 | S | 0.500 | 0.014  |
| SN96 | 2007 | 228 | 0  | 0  | 28.684 | S | 0.500 | 0.680  |
| SNA7 | 2007 | 228 | 0  | 0  | 32.787 | S | 0.500 | 1.302  |
| SND9 | 2007 | 228 | 0  | 0  | 38.958 | S | 0.500 | 0.171  |
| R05C | 2007 | 228 | 0  | 0  | 30.853 | S | 0.500 | 0.525  |
| SNA4 | 2007 | 228 | 0  | 0  | 31.607 | S | 0.500 | 0.144  |
| SNE4 | 2007 | 228 | 0  | 0  | 42.690 | S | 0.500 | -0.174 |
| SNC7 | 2007 | 228 | 0  | 0  | 37.664 | S | 0.500 | 0.272  |
| SND8 | 2007 | 228 | 0  | 0  | 39.062 | S | 0.500 | 0.240  |
| SND7 | 2007 | 228 | 0  | 0  | 40.894 | S | 0.500 | -0.228 |
| O06A | 2007 | 228 | 0  | 0  | 39.853 | S | 0.500 | -0.433 |
| PLM  | 2007 | 227 | 23 | 59 | 22.187 | S | 0.500 | 1.478  |
| DEC  | 2007 | 227 | 23 | 59 | 39.593 | S | 0.500 | 0.041  |
| SLA  | 2007 | 227 | 23 | 59 | 46.971 | S | 0.500 | 1.034  |
| USC  | 2007 | 227 | 23 | 59 | 38.817 | S | 0.500 | 1.604  |
| CHF  | 2007 | 227 | 23 | 59 | 38.229 | S | 0.500 | 0.198  |
| FMP  | 2007 | 227 | 23 | 59 | 36.192 | S | 0.500 | 1.527  |
| CIA  | 2007 | 227 | 23 | 59 | 33.823 | S | 0.500 | 0.951  |

|      |      |     |    |         |           |           |         |        |       |
|------|------|-----|----|---------|-----------|-----------|---------|--------|-------|
| 2007 | 228  | 5   | 16 | 59.8850 | -14.28200 | -76.12700 | 23.4000 | 40     | 3.735 |
| SNC7 | 2007 | 228 | 5  | 36      | 49.673    | S         | 0.500   | 0.359  |       |
| O05C | 2007 | 228 | 5  | 36      | 57.457    | S         | 0.500   | -0.248 |       |
| SNA3 | 2007 | 228 | 5  | 36      | 43.780    | S         | 0.500   | 0.198  |       |
| N07B | 2007 | 228 | 5  | 36      | 50.549    | S         | 0.500   | -1.060 |       |
| SN93 | 2007 | 228 | 5  | 36      | 41.181    | S         | 0.500   | 0.397  |       |
| CMB  | 2007 | 228 | 5  | 36      | 38.539    | S         | 0.500   | -0.011 |       |
| N06A | 2007 | 228 | 5  | 36      | 56.879    | S         | 0.500   | 0.013  |       |
| SNE4 | 2007 | 228 | 5  | 36      | 54.627    | S         | 0.500   | -0.085 |       |
| HATC | 2007 | 228 | 5  | 37      | 7.576     | S         | 0.500   | -0.650 |       |
| DGR  | 2007 | 228 | 5  | 35      | 38.168    | S         | 0.500   | 1.452  |       |
| Q09A | 2007 | 228 | 5  | 36      | 22.578    | S         | 0.500   | -0.740 |       |
| BAK  | 2007 | 228 | 5  | 36      | 7.812     | S         | 0.500   | 0.915  |       |
| V03C | 2007 | 228 | 5  | 36      | 29.184    | S         | 0.500   | 0.898  |       |
| V05C | 2007 | 228 | 5  | 36      | 17.521    | S         | 0.500   | 0.305  |       |
| PIN  | 2007 | 228 | 5  | 37      | 29.344    | S         | 0.500   | 0.778  |       |
| ADO  | 2007 | 228 | 5  | 35      | 47.643    | S         | 0.500   | -0.031 |       |
| JCS  | 2007 | 228 | 5  | 35      | 29.440    | S         | 0.500   | 0.877  |       |
| V04C | 2007 | 228 | 5  | 36      | 22.956    | S         | 0.500   | 0.365  |       |
| DEC  | 2007 | 228 | 5  | 35      | 52.237    | S         | 0.500   | 0.385  |       |
| ELFS | 2007 | 228 | 5  | 37      | 1.759     | S         | 0.500   | -0.220 |       |
| BMN  | 2007 | 228 | 5  | 36      | 34.933    | S         | 0.500   | -2.330 |       |
| Q07A | 2007 | 228 | 5  | 36      | 35.441    | S         | 0.500   | 0.339  |       |
| YBH  | 2007 | 228 | 5  | 37      | 20.646    | S         | 0.500   | -2.975 |       |
| PLM  | 2007 | 228 | 5  | 35      | 34.196    | S         | 0.500   | 1.024  |       |
| FMP  | 2007 | 228 | 5  | 35      | 48.009    | S         | 0.500   | 1.018  |       |
| VES  | 2007 | 228 | 5  | 36      | 10.995    | S         | 0.500   | 0.160  |       |

|      |      |     |   |    |        |   |       |        |
|------|------|-----|---|----|--------|---|-------|--------|
| L05A | 2007 | 228 | 5 | 37 | 14.799 | S | 0.500 | 0.678  |
| RPV  | 2007 | 228 | 5 | 35 | 49.168 | S | 0.500 | 1.188  |
| BBR  | 2007 | 228 | 5 | 35 | 42.689 | S | 0.500 | 1.127  |
| MUR  | 2007 | 228 | 5 | 35 | 39.046 | S | 0.500 | 1.403  |
| R10A | 2007 | 228 | 5 | 36 | 12.838 | S | 0.500 | 0.347  |
| I03A | 2007 | 228 | 5 | 37 | 42.005 | S | 0.500 | -2.108 |
| OSI  | 2007 | 228 | 5 | 35 | 57.701 | S | 0.500 | -0.213 |
| SVD  | 2007 | 228 | 5 | 35 | 42.599 | S | 0.500 | 1.395  |
| HOPS | 2007 | 228 | 5 | 37 | 6.954  | S | 0.500 | 2.255  |
| J03A | 2007 | 228 | 5 | 37 | 34.920 | S | 0.500 | -2.684 |
| P10A | 2007 | 228 | 5 | 36 | 24.883 | S | 0.500 | -0.512 |
| I09A | 2007 | 228 | 5 | 37 | 10.301 | S | 0.500 | -0.581 |
| HUMO | 2007 | 228 | 5 | 37 | 29.089 | S | 0.500 | -2.707 |
| M02C | 2007 | 228 | 5 | 37 | 18.949 | S | 0.500 | -3.038 |
| M10A | 2007 | 228 | 5 | 36 | 42.070 | S | 0.500 | -0.579 |
| TPH  | 2007 | 228 | 5 | 36 | 16.316 | S | 0.500 | -0.590 |
| MPP  | 2007 | 228 | 5 | 36 | 8.809  | S | 0.500 | 0.140  |
| J02A | 2007 | 228 | 5 | 37 | 40.828 | S | 0.500 | -0.418 |
| EDW2 | 2007 | 228 | 5 | 35 | 53.674 | S | 0.500 | -1.113 |
| SND4 | 2007 | 228 | 5 | 36 | 51.415 | S | 0.500 | -0.460 |
| P01C | 2007 | 228 | 5 | 37 | 11.501 | S | 0.500 | 1.015  |
| J04A | 2007 | 228 | 5 | 37 | 30.738 | S | 0.500 | -0.809 |
| SNB6 | 2007 | 228 | 5 | 36 | 45.856 | S | 0.500 | 0.974  |
| J10A | 2007 | 228 | 5 | 36 | 59.502 | S | 0.500 | -0.844 |
| J05A | 2007 | 228 | 5 | 37 | 27.688 | S | 0.500 | 1.111  |
| WVOR | 2007 | 228 | 5 | 37 | 2.579  | S | 0.500 | -0.806 |
| K11A | 2007 | 228 | 5 | 36 | 50.510 | S | 0.500 | 0.109  |
| CIA  | 2007 | 228 | 5 | 35 | 45.938 | S | 0.500 | 0.741  |
| MWC  | 2007 | 228 | 5 | 35 | 50.348 | S | 0.500 | 0.617  |
| M03C | 2007 | 228 | 5 | 37 | 13.839 | S | 0.500 | -2.362 |
| M08A | 2007 | 228 | 5 | 36 | 51.981 | S | 0.500 | -1.334 |
| RCT  | 2007 | 228 | 5 | 36 | 14.307 | S | 0.500 | -1.580 |
| L02A | 2007 | 228 | 5 | 37 | 31.372 | S | 0.500 | -1.142 |
| SNB7 | 2007 | 228 | 5 | 36 | 46.180 | S | 0.500 | 0.697  |
| SHO  | 2007 | 228 | 5 | 35 | 51.698 | S | 0.500 | 0.857  |
| K02A | 2007 | 228 | 5 | 37 | 34.846 | S | 0.500 | -1.727 |
| MCCM | 2007 | 228 | 5 | 36 | 57.040 | S | 0.500 | 0.228  |
| I08A | 2007 | 228 | 5 | 37 | 14.817 | S | 0.500 | -0.404 |
| CHF  | 2007 | 228 | 5 | 35 | 50.748 | S | 0.500 | 0.388  |
| MOD  | 2007 | 228 | 5 | 37 | 9.412  | S | 0.500 | -0.001 |
| SNF8 | 2007 | 228 | 5 | 36 | 56.206 | S | 0.500 | -0.386 |
| LRL  | 2007 | 228 | 5 | 35 | 58.399 | S | 0.500 | 0.756  |
| L08A | 2007 | 228 | 5 | 36 | 57.968 | S | 0.500 | -1.540 |
| ARV  | 2007 | 228 | 5 | 36 | 2.789  | S | 0.500 | -0.029 |
| R08A | 2007 | 228 | 5 | 36 | 25.408 | S | 0.500 | 0.024  |
| HEC  | 2007 | 228 | 5 | 35 | 42.532 | S | 0.500 | 0.483  |
| N09A | 2007 | 228 | 5 | 36 | 41.567 | S | 0.500 | -1.365 |
| CVS  | 2007 | 228 | 5 | 36 | 55.859 | S | 0.500 | 0.376  |
| WENL | 2007 | 228 | 5 | 36 | 46.372 | S | 0.500 | 1.748  |
| L09A | 2007 | 228 | 5 | 36 | 52.384 | S | 0.500 | -1.493 |
| L04A | 2007 | 228 | 5 | 37 | 21.040 | S | 0.500 | -0.836 |
| U04C | 2007 | 228 | 5 | 36 | 28.103 | S | 0.500 | 0.466  |
| DJJ  | 2007 | 228 | 5 | 35 | 52.649 | S | 0.500 | 1.024  |
| RRX  | 2007 | 228 | 5 | 35 | 47.398 | S | 0.500 | 0.087  |
| PASC | 2007 | 228 | 5 | 35 | 50.660 | S | 0.500 | 0.590  |
| SN97 | 2007 | 228 | 5 | 36 | 42.244 | S | 0.500 | 1.147  |
| O09A | 2007 | 228 | 5 | 36 | 33.401 | S | 0.500 | -1.535 |
| SNA7 | 2007 | 228 | 5 | 36 | 44.600 | S | 0.500 | 1.140  |
| SNE5 | 2007 | 228 | 5 | 36 | 54.301 | S | 0.500 | -0.430 |
| GASB | 2007 | 228 | 5 | 37 | 8.759  | S | 0.500 | 1.136  |
| GRA  | 2007 | 228 | 5 | 36 | 9.334  | S | 0.500 | 0.898  |
| SLA  | 2007 | 228 | 5 | 35 | 59.291 | S | 0.500 | 1.046  |
| MNRC | 2007 | 228 | 5 | 37 | 1.122  | S | 0.500 | 1.628  |

|      |      |     |   |    |        |   |       |        |
|------|------|-----|---|----|--------|---|-------|--------|
| SNF6 | 2007 | 228 | 5 | 36 | 55.966 | S | 0.500 | -0.912 |
| J09A | 2007 | 228 | 5 | 37 | 5.219  | S | 0.500 | -0.419 |
| SMM  | 2007 | 228 | 5 | 36 | 13.897 | S | 0.500 | 0.554  |
| M09A | 2007 | 228 | 5 | 36 | 45.992 | S | 0.500 | -1.307 |
| YO10 | 2007 | 228 | 5 | 36 | 30.578 | S | 0.500 | -0.247 |
| O08A | 2007 | 228 | 5 | 36 | 40.924 | S | 0.500 | -1.494 |
| SUTB | 2007 | 228 | 5 | 36 | 57.935 | S | 0.500 | 0.285  |
| Q08A | 2007 | 228 | 5 | 36 | 27.876 | S | 0.500 | -0.526 |
| N02C | 2007 | 228 | 5 | 37 | 18.752 | S | 0.500 | -1.904 |
| O10A | 2007 | 228 | 5 | 36 | 30.159 | S | 0.500 | -1.468 |
| SNG5 | 2007 | 228 | 5 | 36 | 59.114 | S | 0.500 | -0.862 |
| SN63 | 2007 | 228 | 5 | 36 | 31.749 | S | 0.500 | -0.376 |
| BFS  | 2007 | 228 | 5 | 35 | 47.515 | S | 0.500 | 0.630  |
| SNC6 | 2007 | 228 | 5 | 36 | 48.207 | S | 0.500 | 0.369  |
| SNE6 | 2007 | 228 | 5 | 36 | 53.110 | S | 0.500 | -0.362 |
| FUR  | 2007 | 228 | 5 | 36 | 1.053  | S | 0.500 | 1.049  |
| L07A | 2007 | 228 | 5 | 37 | 4.557  | S | 0.500 | 0.230  |
| HELL | 2007 | 228 | 5 | 36 | 16.417 | S | 0.500 | -1.133 |
| VTV  | 2007 | 228 | 5 | 35 | 46.805 | S | 0.500 | -0.287 |
| SNG7 | 2007 | 228 | 5 | 36 | 59.901 | S | 0.500 | -0.761 |
| P05C | 2007 | 228 | 5 | 36 | 50.818 | S | 0.500 | 0.403  |
| SND5 | 2007 | 228 | 5 | 36 | 51.544 | S | 0.500 | 0.023  |
| TPNV | 2007 | 228 | 5 | 36 | 0.783  | S | 0.500 | 0.586  |
| ORV  | 2007 | 228 | 5 | 36 | 58.020 | S | 0.500 | -0.089 |
| SN87 | 2007 | 228 | 5 | 36 | 40.356 | S | 0.500 | 1.368  |
| S10A | 2007 | 228 | 5 | 36 | 11.314 | S | 0.500 | 0.013  |
| JRSC | 2007 | 228 | 5 | 36 | 47.008 | S | 0.500 | 0.599  |
| PHL  | 2007 | 228 | 5 | 36 | 18.326 | S | 0.500 | 0.050  |
| N08A | 2007 | 228 | 5 | 36 | 45.335 | S | 0.500 | -0.967 |
| YO01 | 2007 | 228 | 5 | 36 | 31.869 | S | 0.500 | -0.293 |
| O04C | 2007 | 228 | 5 | 37 | 0.968  | S | 0.500 | -0.848 |
| SNA4 | 2007 | 228 | 5 | 36 | 43.742 | S | 0.500 | 0.330  |
| YO06 | 2007 | 228 | 5 | 36 | 32.115 | S | 0.500 | 0.117  |
| SNB9 | 2007 | 228 | 5 | 36 | 44.960 | S | 0.500 | 0.689  |
| SND9 | 2007 | 228 | 5 | 36 | 51.072 | S | 0.500 | 0.366  |
| SNE7 | 2007 | 228 | 5 | 36 | 55.161 | S | 0.500 | -0.222 |
| K06A | 2007 | 228 | 5 | 37 | 17.203 | S | 0.500 | 0.776  |
| BNLO | 2007 | 228 | 5 | 36 | 44.388 | S | 0.500 | 0.155  |
| YO07 | 2007 | 228 | 5 | 36 | 31.516 | S | 0.500 | 0.004  |
| S09A | 2007 | 228 | 5 | 36 | 14.014 | S | 0.500 | 0.196  |
| Q10A | 2007 | 228 | 5 | 36 | 17.857 | S | 0.500 | -0.116 |
| WCN  | 2007 | 228 | 5 | 36 | 46.080 | S | 0.500 | 1.292  |
| CWC  | 2007 | 228 | 5 | 36 | 10.470 | S | 0.500 | 1.586  |
| GSC  | 2007 | 228 | 5 | 35 | 50.509 | S | 0.500 | 0.812  |
| YO09 | 2007 | 228 | 5 | 36 | 31.223 | S | 0.500 | 0.310  |
| BDM  | 2007 | 228 | 5 | 36 | 49.779 | S | 0.500 | 1.560  |
| MPM  | 2007 | 228 | 5 | 36 | 2.778  | S | 0.500 | 1.326  |
| VCS  | 2007 | 228 | 5 | 35 | 52.132 | S | 0.500 | -0.261 |
| R09A | 2007 | 228 | 5 | 36 | 17.237 | S | 0.500 | -0.165 |
| SN96 | 2007 | 228 | 5 | 36 | 40.811 | S | 0.500 | 0.833  |
| HAST | 2007 | 228 | 5 | 36 | 34.159 | S | 0.500 | 0.530  |
| YO02 | 2007 | 228 | 5 | 36 | 31.925 | S | 0.500 | -0.420 |
| YO05 | 2007 | 228 | 5 | 36 | 32.391 | S | 0.500 | 0.095  |
| PACP | 2007 | 228 | 5 | 36 | 36.984 | S | 0.500 | 0.357  |
| YO11 | 2007 | 228 | 5 | 36 | 31.188 | S | 0.500 | 0.424  |
| SN64 | 2007 | 228 | 5 | 36 | 32.361 | S | 0.500 | 0.114  |
| L10A | 2007 | 228 | 5 | 36 | 46.346 | S | 0.500 | -0.663 |
| SND8 | 2007 | 228 | 5 | 36 | 50.768 | S | 0.500 | 0.028  |
| ISA  | 2007 | 228 | 5 | 36 | 6.314  | S | 0.500 | 1.258  |
| YO03 | 2007 | 228 | 5 | 36 | 31.977 | S | 0.500 | -0.286 |
| SNE9 | 2007 | 228 | 5 | 36 | 53.795 | S | 0.500 | 0.223  |
| J06A | 2007 | 228 | 5 | 37 | 20.042 | S | 0.500 | 0.657  |
| SNB3 | 2007 | 228 | 5 | 36 | 47.048 | S | 0.500 | 0.229  |

|      |      |     |   |    |        |   |       |        |
|------|------|-----|---|----|--------|---|-------|--------|
| YO04 | 2007 | 228 | 5 | 36 | 32.230 | S | 0.500 | -0.004 |
| SN55 | 2007 | 228 | 5 | 36 | 30.985 | S | 0.500 | 0.723  |
| SND7 | 2007 | 228 | 5 | 36 | 52.924 | S | 0.500 | -0.087 |

|      |      |     |    |         |           |           |         |        |       |
|------|------|-----|----|---------|-----------|-----------|---------|--------|-------|
| 2007 | 230  | 2   | 52 | 38.4850 | -13.80500 | -76.29100 | 30.0000 | 41     | 3.085 |
| SND7 | 2007 | 230 | 3  | 12      | 24.199    | S         | 0.500   | -0.074 |       |
| SNC3 | 2007 | 230 | 3  | 12      | 20.603    | S         | 0.500   | -0.144 |       |
| L05A | 2007 | 230 | 3  | 12      | 46.018    | S         | 0.500   | 0.590  |       |
| FMP  | 2007 | 230 | 3  | 11      | 19.278    | S         | 0.500   | 1.174  |       |
| ARV  | 2007 | 230 | 3  | 11      | 33.842    | S         | 0.500   | -0.122 |       |
| M07A | 2007 | 230 | 3  | 12      | 28.269    | S         | 0.500   | -0.968 |       |
| O10A | 2007 | 230 | 3  | 12      | 1.208     | S         | 0.500   | -1.502 |       |
| L07A | 2007 | 230 | 3  | 12      | 35.611    | S         | 0.500   | 0.045  |       |
| SNB7 | 2007 | 230 | 3  | 12      | 17.179    | S         | 0.500   | 0.467  |       |
| SN87 | 2007 | 230 | 3  | 12      | 11.175    | S         | 0.500   | 0.979  |       |
| SNG7 | 2007 | 230 | 3  | 12      | 31.209    | S         | 0.500   | -0.749 |       |
| SND9 | 2007 | 230 | 3  | 12      | 22.023    | S         | 0.500   | 0.076  |       |
| T06C | 2007 | 230 | 3  | 11      | 53.025    | S         | 0.500   | -3.190 |       |
| Q10A | 2007 | 230 | 3  | 11      | 48.827    | S         | 0.500   | -0.211 |       |
| SNC5 | 2007 | 230 | 3  | 12      | 20.006    | S         | 0.500   | -0.437 |       |
| SUTB | 2007 | 230 | 3  | 12      | 29.164    | S         | 0.500   | 0.205  |       |
| MWC  | 2007 | 230 | 3  | 11      | 21.356    | S         | 0.500   | 0.525  |       |
| L09A | 2007 | 230 | 3  | 12      | 23.567    | S         | 0.500   | -1.476 |       |
| SN98 | 2007 | 230 | 3  | 12      | 11.457    | S         | 0.500   | 0.963  |       |
| SNF8 | 2007 | 230 | 3  | 12      | 27.489    | S         | 0.500   | -0.368 |       |
| O09A | 2007 | 230 | 3  | 12      | 4.279     | S         | 0.500   | -1.771 |       |
| M09A | 2007 | 230 | 3  | 12      | 17.054    | S         | 0.500   | -1.388 |       |
| PHL  | 2007 | 230 | 3  | 11      | 49.572    | S         | 0.500   | 0.060  |       |
| YO10 | 2007 | 230 | 3  | 12      | 1.731     | S         | 0.500   | -0.283 |       |
| L08A | 2007 | 230 | 3  | 12      | 28.882    | S         | 0.500   | -1.826 |       |
| PASC | 2007 | 230 | 3  | 11      | 21.674    | S         | 0.500   | 0.496  |       |
| YO05 | 2007 | 230 | 3  | 12      | 3.555     | S         | 0.500   | 0.056  |       |
| DGR  | 2007 | 230 | 3  | 11      | 9.266     | S         | 0.500   | 1.525  |       |
| YO08 | 2007 | 230 | 3  | 12      | 2.522     | S         | 0.500   | 0.257  |       |
| DJJ  | 2007 | 230 | 3  | 11      | 23.828    | S         | 0.500   | 1.079  |       |
| RRX  | 2007 | 230 | 3  | 11      | 18.453    | S         | 0.500   | 0.095  |       |
| BBR  | 2007 | 230 | 3  | 11      | 13.986    | S         | 0.500   | 1.400  |       |
| MUR  | 2007 | 230 | 3  | 11      | 10.254    | S         | 0.500   | 1.581  |       |
| K09A | 2007 | 230 | 3  | 12      | 30.140    | S         | 0.500   | -0.919 |       |
| SND4 | 2007 | 230 | 3  | 12      | 22.513    | S         | 0.500   | -0.647 |       |
| I06A | 2007 | 230 | 3  | 12      | 57.611    | S         | 0.500   | 0.850  |       |
| SN96 | 2007 | 230 | 3  | 12      | 11.849    | S         | 0.500   | 0.647  |       |
| SNA7 | 2007 | 230 | 3  | 12      | 15.286    | S         | 0.500   | 0.612  |       |
| YO11 | 2007 | 230 | 3  | 12      | 2.139     | S         | 0.500   | 0.188  |       |
| EDW2 | 2007 | 230 | 3  | 11      | 24.581    | S         | 0.500   | -1.302 |       |
| YO06 | 2007 | 230 | 3  | 12      | 3.226     | S         | 0.500   | 0.034  |       |
| SN64 | 2007 | 230 | 3  | 12      | 3.374     | S         | 0.500   | -0.070 |       |
| SNA4 | 2007 | 230 | 3  | 12      | 14.604    | S         | 0.500   | -0.046 |       |
| SVD  | 2007 | 230 | 3  | 11      | 13.754    | S         | 0.500   | 1.512  |       |
| SNA3 | 2007 | 230 | 3  | 12      | 15.049    | S         | 0.500   | 0.221  |       |
| HELL | 2007 | 230 | 3  | 11      | 47.388    | S         | 0.500   | -1.326 |       |
| MPM  | 2007 | 230 | 3  | 11      | 33.566    | S         | 0.500   | 1.031  |       |
| SN97 | 2007 | 230 | 3  | 12      | 13.124    | S         | 0.500   | 0.816  |       |
| LRL  | 2007 | 230 | 3  | 11      | 29.644    | S         | 0.500   | 0.916  |       |
| CHF  | 2007 | 230 | 3  | 11      | 21.855    | S         | 0.500   | 0.395  |       |
| SND5 | 2007 | 230 | 3  | 12      | 22.482    | S         | 0.500   | -0.313 |       |
| SNB3 | 2007 | 230 | 3  | 12      | 18.082    | S         | 0.500   | -0.008 |       |
| O06A | 2007 | 230 | 3  | 12      | 23.209    | S         | 0.500   | -0.229 |       |
| GRA  | 2007 | 230 | 3  | 11      | 40.425    | S         | 0.500   | 0.914  |       |
| SNE6 | 2007 | 230 | 3  | 12      | 24.247    | S         | 0.500   | -0.498 |       |
| MOD  | 2007 | 230 | 3  | 12      | 40.555    | S         | 0.500   | -0.135 |       |
| R06C | 2007 | 230 | 3  | 12      | 8.939     | S         | 0.500   | 1.534  |       |
| S10A | 2007 | 230 | 3  | 11      | 42.230    | S         | 0.500   | -0.123 |       |

|      |      |     |   |    |        |   |       |        |
|------|------|-----|---|----|--------|---|-------|--------|
| SN55 | 2007 | 230 | 3 | 12 | 1.782  | S | 0.500 | 0.338  |
| SNE5 | 2007 | 230 | 3 | 12 | 25.252 | S | 0.500 | -0.765 |
| R09A | 2007 | 230 | 3 | 11 | 48.179 | S | 0.500 | -0.311 |
| SHO  | 2007 | 230 | 3 | 11 | 22.423 | S | 0.500 | 0.560  |
| SNC6 | 2007 | 230 | 3 | 12 | 18.921 | S | 0.500 | -0.167 |
| P09A | 2007 | 230 | 3 | 11 | 58.841 | S | 0.500 | -1.567 |
| GSC  | 2007 | 230 | 3 | 11 | 21.406 | S | 0.500 | 0.667  |
| HEC  | 2007 | 230 | 3 | 11 | 13.401 | S | 0.500 | 0.352  |
| SND8 | 2007 | 230 | 3 | 12 | 21.877 | S | 0.500 | -0.110 |
| S06C | 2007 | 230 | 3 | 12 | 4.235  | S | 0.500 | -0.543 |
| ORV  | 2007 | 230 | 3 | 12 | 29.289 | S | 0.500 | -0.123 |
| CMB  | 2007 | 230 | 3 | 12 | 9.290  | S | 0.500 | -0.497 |
| WCN  | 2007 | 230 | 3 | 12 | 17.014 | S | 0.500 | 1.011  |
| K10A | 2007 | 230 | 3 | 12 | 26.358 | S | 0.500 | -0.352 |
| J06A | 2007 | 230 | 3 | 12 | 51.152 | S | 0.500 | 0.469  |
| L10A | 2007 | 230 | 3 | 12 | 17.281 | S | 0.500 | -0.846 |
| SNG5 | 2007 | 230 | 3 | 12 | 30.385 | S | 0.500 | -0.894 |
| SNF9 | 2007 | 230 | 3 | 12 | 27.088 | S | 0.500 | -0.407 |
| R04C | 2007 | 230 | 3 | 12 | 15.931 | S | 0.500 | 0.770  |
| SNC7 | 2007 | 230 | 3 | 12 | 20.636 | S | 0.500 | 0.071  |
| R05C | 2007 | 230 | 3 | 12 | 13.608 | S | 0.500 | 0.089  |
| SNF6 | 2007 | 230 | 3 | 12 | 27.166 | S | 0.500 | -0.994 |
| BFS  | 2007 | 230 | 3 | 11 | 18.752 | S | 0.500 | 0.793  |
| ISA  | 2007 | 230 | 3 | 11 | 37.051 | S | 0.500 | 0.869  |
| SNB9 | 2007 | 230 | 3 | 12 | 15.886 | S | 0.500 | 0.409  |
| SN93 | 2007 | 230 | 3 | 12 | 12.243 | S | 0.500 | 0.215  |
| P05C | 2007 | 230 | 3 | 12 | 21.592 | S | 0.500 | -0.082 |
| SNE9 | 2007 | 230 | 3 | 12 | 24.707 | S | 0.500 | -0.113 |
| VCS  | 2007 | 230 | 3 | 11 | 23.294 | S | 0.500 | -0.205 |
| DEC  | 2007 | 230 | 3 | 11 | 23.210 | S | 0.500 | 0.243  |

|      |      |     |    |         |           |            |          |        |
|------|------|-----|----|---------|-----------|------------|----------|--------|
| 2007 | 238  | 12  | 37 | 34.1011 | -17.45700 | -174.33501 | 127.4000 |        |
| BFS  | 2007 | 238 | 12 | 58      | 24.613    | S          | 0.500    | 0.555  |
| P01C | 2007 | 238 | 12 | 58      | 17.653    | S          | 0.500    | -0.231 |
| R10A | 2007 | 238 | 12 | 58      | 58.638    | S          | 0.500    | -0.228 |
| RRX  | 2007 | 238 | 12 | 58      | 31.700    | S          | 0.500    | -1.156 |
| P10A | 2007 | 238 | 12 | 59      | 4.194     | S          | 0.500    | -1.541 |
| S04C | 2007 | 238 | 12 | 58      | 19.293    | S          | 0.500    | 1.178  |
| U04C | 2007 | 238 | 12 | 58      | 16.226    | S          | 0.500    | 1.889  |
| Q07A | 2007 | 238 | 12 | 58      | 45.371    | S          | 0.500    | 0.202  |
| V04C | 2007 | 238 | 12 | 58      | 9.938     | S          | 0.500    | 1.088  |
| PASC | 2007 | 238 | 12 | 58      | 19.389    | S          | 0.500    | -0.224 |
| CIA  | 2007 | 238 | 12 | 58      | 13.491    | S          | 0.500    | 0.442  |
| HATC | 2007 | 238 | 12 | 58      | 39.285    | S          | 0.500    | -0.593 |
| SUTB | 2007 | 238 | 12 | 58      | 25.746    | S          | 0.500    | -0.983 |
| CHF  | 2007 | 238 | 12 | 58      | 22.222    | S          | 0.500    | 0.274  |
| M09A | 2007 | 238 | 12 | 59      | 9.049     | S          | 0.500    | -0.848 |
| L05A | 2007 | 238 | 12 | 58      | 52.384    | S          | 0.500    | 0.059  |
| ELFS | 2007 | 238 | 12 | 58      | 42.974    | S          | 0.500    | -0.290 |
| PIN  | 2007 | 238 | 12 | 59      | 3.079     | S          | 0.500    | -0.409 |
| GASB | 2007 | 238 | 12 | 58      | 24.490    | S          | 0.500    | 1.019  |
| DBO  | 2007 | 238 | 12 | 58      | 45.175    | S          | 0.500    | 0.887  |
| MWC  | 2007 | 238 | 12 | 58      | 21.183    | S          | 0.500    | -0.049 |
| MUR  | 2007 | 238 | 12 | 58      | 24.630    | S          | 0.500    | 0.954  |
| DGR  | 2007 | 238 | 12 | 58      | 26.172    | S          | 0.500    | 0.866  |
| M08A | 2007 | 238 | 12 | 59      | 3.603     | S          | 0.500    | -0.379 |
| HEC  | 2007 | 238 | 12 | 58      | 36.933    | S          | 0.500    | -0.622 |
| V03C | 2007 | 238 | 12 | 58      | 9.838     | S          | 0.500    | 1.294  |
| Q10A | 2007 | 238 | 12 | 59      | 0.638     | S          | 0.500    | -0.687 |
| MLAC | 2007 | 238 | 12 | 58      | 39.240    | S          | 0.500    | 2.270  |
| SVD  | 2007 | 238 | 12 | 58      | 28.301    | S          | 0.500    | 0.708  |
| K05A | 2007 | 238 | 12 | 58      | 56.436    | S          | 0.500    | 0.064  |
| LRL  | 2007 | 238 | 12 | 58      | 32.744    | S          | 0.500    | 1.196  |

42

2.911

|      |      |     |    |    |        |   |       |        |
|------|------|-----|----|----|--------|---|-------|--------|
| GRA  | 2007 | 238 | 12 | 58 | 43.431 | S | 0.500 | 0.193  |
| VCS  | 2007 | 238 | 12 | 58 | 22.327 | S | 0.500 | 0.352  |
| TPH  | 2007 | 238 | 12 | 58 | 50.862 | S | 0.500 | -0.237 |
| BBR  | 2007 | 238 | 12 | 58 | 30.408 | S | 0.500 | 0.223  |
| HAST | 2007 | 238 | 12 | 58 | 10.019 | S | 0.500 | 1.189  |
| J03A | 2007 | 238 | 12 | 58 | 48.683 | S | 0.500 | 1.331  |
| GSC  | 2007 | 238 | 12 | 58 | 37.241 | S | 0.500 | 0.259  |
| TIN  | 2007 | 238 | 12 | 58 | 38.167 | S | 0.500 | 0.648  |
| P09A | 2007 | 238 | 12 | 58 | 59.459 | S | 0.500 | -1.035 |
| K06A | 2007 | 238 | 12 | 59 | 0.701  | S | 0.500 | 0.149  |
| RCT  | 2007 | 238 | 12 | 58 | 24.072 | S | 0.500 | -1.020 |
| SNE7 | 2007 | 238 | 12 | 58 | 37.126 | S | 0.500 | -0.943 |
| ORV  | 2007 | 238 | 12 | 58 | 30.289 | S | 0.500 | -0.443 |
| EDW2 | 2007 | 238 | 12 | 58 | 25.567 | S | 0.500 | 0.172  |
| L02A | 2007 | 238 | 12 | 58 | 36.423 | S | 0.500 | 1.205  |
| U10A | 2007 | 238 | 12 | 58 | 47.776 | S | 0.500 | 0.535  |
| SND5 | 2007 | 238 | 12 | 58 | 31.870 | S | 0.500 | -0.299 |
| SN87 | 2007 | 238 | 12 | 58 | 38.907 | S | 0.500 | 0.325  |
| MOD  | 2007 | 238 | 12 | 58 | 54.429 | S | 0.500 | -0.095 |
| HUMO | 2007 | 238 | 12 | 58 | 43.288 | S | 0.500 | 0.882  |
| R08A | 2007 | 238 | 12 | 58 | 47.461 | S | 0.500 | 0.969  |
| S10A | 2007 | 238 | 12 | 58 | 54.482 | S | 0.500 | -0.214 |
| L07A | 2007 | 238 | 12 | 59 | 1.741  | S | 0.500 | 0.233  |
| SN55 | 2007 | 238 | 12 | 58 | 35.816 | S | 0.500 | 0.458  |
| L04A | 2007 | 238 | 12 | 58 | 46.010 | S | 0.500 | -0.217 |
| M05C | 2007 | 238 | 12 | 58 | 45.192 | S | 0.500 | -0.341 |
| L09A | 2007 | 238 | 12 | 59 | 11.329 | S | 0.500 | -0.703 |
| SN98 | 2007 | 238 | 12 | 58 | 41.228 | S | 0.500 | 0.172  |
| N07B | 2007 | 238 | 12 | 58 | 55.165 | S | 0.500 | -0.623 |
| S05C | 2007 | 238 | 12 | 58 | 23.798 | S | 0.500 | -0.373 |
| SHO  | 2007 | 238 | 12 | 58 | 44.937 | S | 0.500 | 0.380  |
| K11A | 2007 | 238 | 12 | 59 | 26.505 | S | 0.500 | -0.288 |
| HELL | 2007 | 238 | 12 | 58 | 28.245 | S | 0.500 | -1.196 |
| R04C | 2007 | 238 | 12 | 58 | 25.619 | S | 0.500 | -0.144 |
| SNB7 | 2007 | 238 | 12 | 58 | 37.178 | S | 0.500 | 0.067  |
| CWC  | 2007 | 238 | 12 | 58 | 35.463 | S | 0.500 | 0.485  |
| TPNV | 2007 | 238 | 12 | 58 | 51.097 | S | 0.500 | -0.069 |
| SNB9 | 2007 | 238 | 12 | 58 | 43.318 | S | 0.500 | 0.478  |
| K07A | 2007 | 238 | 12 | 59 | 6.344  | S | 0.500 | 0.204  |
| WDC  | 2007 | 238 | 12 | 58 | 30.207 | S | 0.500 | -0.681 |
| SNE4 | 2007 | 238 | 12 | 58 | 29.601 | S | 0.500 | 0.013  |
| L10A | 2007 | 238 | 12 | 59 | 18.853 | S | 0.500 | -1.426 |
| YO11 | 2007 | 238 | 12 | 58 | 35.028 | S | 0.500 | 0.272  |
| N09A | 2007 | 238 | 12 | 59 | 5.344  | S | 0.500 | -0.489 |
| SNF9 | 2007 | 238 | 12 | 58 | 41.383 | S | 0.500 | -1.162 |
| SNF8 | 2007 | 238 | 12 | 58 | 38.740 | S | 0.500 | -1.425 |
| SLA  | 2007 | 238 | 12 | 58 | 37.740 | S | 0.500 | 0.519  |
| YBH  | 2007 | 238 | 12 | 58 | 38.358 | S | 0.500 | 0.444  |
| SND9 | 2007 | 238 | 12 | 58 | 42.714 | S | 0.500 | -0.376 |
| S08C | 2007 | 238 | 12 | 58 | 42.550 | S | 0.500 | 1.517  |
| M02C | 2007 | 238 | 12 | 58 | 35.175 | S | 0.500 | 0.568  |
| J08A | 2007 | 238 | 12 | 59 | 15.205 | S | 0.500 | 0.070  |
| SNG7 | 2007 | 238 | 12 | 58 | 35.537 | S | 0.500 | -1.482 |
| SND4 | 2007 | 238 | 12 | 58 | 29.597 | S | 0.500 | -0.017 |
| K08A | 2007 | 238 | 12 | 59 | 11.041 | S | 0.500 | -0.305 |
| SNC5 | 2007 | 238 | 12 | 58 | 32.006 | S | 0.500 | -0.431 |
| S09A | 2007 | 238 | 12 | 58 | 48.686 | S | 0.500 | -0.214 |
| SNE5 | 2007 | 238 | 12 | 58 | 31.842 | S | 0.500 | -0.297 |
| WVOR | 2007 | 238 | 12 | 59 | 8.178  | S | 0.500 | -0.161 |
| SNE9 | 2007 | 238 | 12 | 58 | 42.391 | S | 0.500 | -0.843 |
| R09A | 2007 | 238 | 12 | 58 | 53.277 | S | 0.500 | 0.010  |
| SNB3 | 2007 | 238 | 12 | 58 | 27.650 | S | 0.500 | -0.058 |
| L08A | 2007 | 238 | 12 | 59 | 8.238  | S | 0.500 | -0.585 |



|      |      |     |    |    |        |   |       |        |
|------|------|-----|----|----|--------|---|-------|--------|
| YO02 | 2007 | 238 | 12 | 58 | 31.243 | S | 0.500 | -0.217 |
| YO08 | 2007 | 238 | 12 | 58 | 33.505 | S | 0.500 | 0.174  |
| SNA7 | 2007 | 238 | 12 | 58 | 39.059 | S | 0.500 | 0.468  |
| WCN  | 2007 | 238 | 12 | 58 | 41.713 | S | 0.500 | 0.534  |
| YO09 | 2007 | 238 | 12 | 58 | 33.972 | S | 0.500 | 0.232  |
| CMB  | 2007 | 238 | 12 | 58 | 28.636 | S | 0.500 | 0.342  |
| SNG5 | 2007 | 238 | 12 | 58 | 30.884 | S | 0.500 | -0.812 |
| SNA4 | 2007 | 238 | 12 | 58 | 30.826 | S | 0.500 | 0.421  |
| SN97 | 2007 | 238 | 12 | 58 | 38.309 | S | 0.500 | 0.454  |
| N08A | 2007 | 238 | 12 | 59 | 0.709  | S | 0.500 | -0.644 |
| SNA3 | 2007 | 238 | 12 | 58 | 28.878 | S | 0.500 | 0.594  |
| SNC6 | 2007 | 238 | 12 | 58 | 34.666 | S | 0.500 | -0.425 |
| SND8 | 2007 | 238 | 12 | 58 | 40.017 | S | 0.500 | -0.169 |
| LAVA | 2007 | 238 | 12 | 58 | 30.722 | S | 0.500 | 0.153  |
| YO10 | 2007 | 238 | 12 | 58 | 34.402 | S | 0.500 | 0.180  |
| SNC7 | 2007 | 238 | 12 | 58 | 36.944 | S | 0.500 | -0.136 |
| P05C | 2007 | 238 | 12 | 58 | 35.333 | S | 0.500 | -0.014 |
| SNF6 | 2007 | 238 | 12 | 58 | 34.035 | S | 0.500 | -0.713 |
| SND7 | 2007 | 238 | 12 | 58 | 37.297 | S | 0.500 | -0.498 |
| YO07 | 2007 | 238 | 12 | 58 | 33.206 | S | 0.500 | 0.203  |
| SN63 | 2007 | 238 | 12 | 58 | 30.570 | S | 0.500 | -0.152 |
| T06C | 2007 | 238 | 12 | 58 | 26.210 | S | 0.500 | -0.193 |
| YO05 | 2007 | 238 | 12 | 58 | 32.404 | S | 0.500 | -0.079 |
| R05C | 2007 | 238 | 12 | 58 | 35.664 | S | 0.500 | 0.321  |
| SN64 | 2007 | 238 | 12 | 58 | 32.974 | S | 0.500 | 0.125  |
| SN93 | 2007 | 238 | 12 | 58 | 28.261 | S | 0.500 | 0.868  |
| YO01 | 2007 | 238 | 12 | 58 | 30.871 | S | 0.500 | -0.075 |
| YO06 | 2007 | 238 | 12 | 58 | 33.205 | S | 0.500 | 0.226  |
| O08A | 2007 | 238 | 12 | 58 | 57.639 | S | 0.500 | -0.679 |
| KCC  | 2007 | 238 | 12 | 58 | 31.651 | S | 0.500 | 0.227  |
| SNE6 | 2007 | 238 | 12 | 58 | 34.505 | S | 0.500 | -0.541 |
| SN96 | 2007 | 238 | 12 | 58 | 34.190 | S | 0.500 | 0.080  |
| S06C | 2007 | 238 | 12 | 58 | 31.171 | S | 0.500 | -0.266 |
| YO03 | 2007 | 238 | 12 | 58 | 31.576 | S | 0.500 | -0.113 |
| YO04 | 2007 | 238 | 12 | 58 | 32.084 | S | 0.500 | -0.056 |
| P10A | 2007 | 238 | 12 | 59 | 4.087  | S | 0.500 | -1.648 |
| DJJ  | 2007 | 238 | 12 | 58 | 17.166 | S | 0.500 | 0.250  |
| FMP  | 2007 | 238 | 12 | 58 | 16.292 | S | 0.500 | 0.579  |
| LGU  | 2007 | 238 | 12 | 58 | 12.685 | S | 0.500 | 0.279  |
| S04C | 2007 | 238 | 12 | 58 | 19.186 | S | 0.500 | 1.070  |
| FUR  | 2007 | 238 | 12 | 58 | 42.839 | S | 0.500 | -0.433 |
| ARV  | 2007 | 238 | 12 | 58 | 21.134 | S | 0.500 | 0.634  |
| U04C | 2007 | 238 | 12 | 58 | 16.119 | S | 0.500 | 1.782  |
| V04C | 2007 | 238 | 12 | 58 | 9.781  | S | 0.500 | 0.930  |
| Q07A | 2007 | 238 | 12 | 58 | 45.264 | S | 0.500 | 0.095  |
| CIA  | 2007 | 238 | 12 | 58 | 13.434 | S | 0.500 | 0.385  |
| HATC | 2007 | 238 | 12 | 58 | 39.178 | S | 0.500 | -0.700 |
| SUTB | 2007 | 238 | 12 | 58 | 25.689 | S | 0.500 | -1.040 |
| CHF  | 2007 | 238 | 12 | 58 | 22.115 | S | 0.500 | 0.167  |
| M09A | 2007 | 238 | 12 | 59 | 8.941  | S | 0.500 | -0.956 |
| L05A | 2007 | 238 | 12 | 58 | 52.327 | S | 0.500 | 0.002  |
| ELFS | 2007 | 238 | 12 | 58 | 42.867 | S | 0.500 | -0.397 |
| PACP | 2007 | 238 | 12 | 58 | 15.935 | S | 0.500 | 0.697  |
| PIN  | 2007 | 238 | 12 | 59 | 2.972  | S | 0.500 | -0.517 |
| GASB | 2007 | 238 | 12 | 58 | 24.383 | S | 0.500 | 0.912  |
| DBO  | 2007 | 238 | 12 | 58 | 45.118 | S | 0.500 | 0.830  |
| PKD  | 2007 | 238 | 12 | 58 | 14.609 | S | 0.500 | 1.428  |
| MUR  | 2007 | 238 | 12 | 58 | 24.473 | S | 0.500 | 0.797  |
| MWC  | 2007 | 238 | 12 | 58 | 21.076 | S | 0.500 | -0.157 |
| M08A | 2007 | 238 | 12 | 59 | 3.546  | S | 0.500 | -0.436 |
| DGR  | 2007 | 238 | 12 | 58 | 26.065 | S | 0.500 | 0.759  |
| BFS  | 2007 | 238 | 12 | 58 | 24.506 | S | 0.500 | 0.448  |
| V03C | 2007 | 238 | 12 | 58 | 9.780  | S | 0.500 | 1.236  |

|      |      |     |    |    |        |   |       |        |
|------|------|-----|----|----|--------|---|-------|--------|
| Q10A | 2007 | 238 | 12 | 59 | 0.531  | S | 0.500 | -0.794 |
| HEC  | 2007 | 238 | 12 | 58 | 36.826 | S | 0.500 | -0.729 |
| MLAC | 2007 | 238 | 12 | 58 | 39.183 | S | 0.500 | 2.213  |
| SVD  | 2007 | 238 | 12 | 58 | 28.244 | S | 0.500 | 0.651  |
| K05A | 2007 | 238 | 12 | 58 | 56.329 | S | 0.500 | -0.042 |
| LRL  | 2007 | 238 | 12 | 58 | 32.687 | S | 0.500 | 1.139  |
| GRA  | 2007 | 238 | 12 | 58 | 43.324 | S | 0.500 | 0.086  |
| VCS  | 2007 | 238 | 12 | 58 | 22.270 | S | 0.500 | 0.295  |
| TPH  | 2007 | 238 | 12 | 58 | 50.805 | S | 0.500 | -0.294 |
| BBR  | 2007 | 238 | 12 | 58 | 30.301 | S | 0.500 | 0.116  |
| HAST | 2007 | 238 | 12 | 58 | 9.962  | S | 0.500 | 1.132  |
| J03A | 2007 | 238 | 12 | 58 | 48.626 | S | 0.500 | 1.274  |
| GSC  | 2007 | 238 | 12 | 58 | 37.184 | S | 0.500 | 0.202  |
| TIN  | 2007 | 238 | 12 | 58 | 38.110 | S | 0.500 | 0.591  |
| P09A | 2007 | 238 | 12 | 58 | 59.352 | S | 0.500 | -1.142 |
| K06A | 2007 | 238 | 12 | 59 | 0.594  | S | 0.500 | 0.042  |
| SNE7 | 2007 | 238 | 12 | 58 | 37.069 | S | 0.500 | -1.000 |
| RCT  | 2007 | 238 | 12 | 58 | 24.015 | S | 0.500 | -1.077 |
| ORV  | 2007 | 238 | 12 | 58 | 30.232 | S | 0.500 | -0.500 |
| L02A | 2007 | 238 | 12 | 58 | 36.316 | S | 0.500 | 1.098  |
| U10A | 2007 | 238 | 12 | 58 | 47.719 | S | 0.500 | 0.478  |
| EDW2 | 2007 | 238 | 12 | 58 | 25.510 | S | 0.500 | 0.115  |
| SND5 | 2007 | 238 | 12 | 58 | 31.763 | S | 0.500 | -0.406 |
| SN87 | 2007 | 238 | 12 | 58 | 38.850 | S | 0.500 | 0.268  |
| MOD  | 2007 | 238 | 12 | 58 | 54.372 | S | 0.500 | -0.152 |
| R08A | 2007 | 238 | 12 | 58 | 47.354 | S | 0.500 | 0.862  |
| HUMO | 2007 | 238 | 12 | 58 | 43.231 | S | 0.500 | 0.825  |
| L07A | 2007 | 238 | 12 | 59 | 1.634  | S | 0.500 | 0.126  |
| S10A | 2007 | 238 | 12 | 58 | 54.425 | S | 0.500 | -0.271 |
| SN55 | 2007 | 238 | 12 | 58 | 35.759 | S | 0.500 | 0.400  |
| L04A | 2007 | 238 | 12 | 58 | 45.903 | S | 0.500 | -0.324 |
| M05C | 2007 | 238 | 12 | 58 | 45.085 | S | 0.500 | -0.448 |
| L09A | 2007 | 238 | 12 | 59 | 11.222 | S | 0.500 | -0.810 |
| N07B | 2007 | 238 | 12 | 58 | 55.058 | S | 0.500 | -0.730 |
| SN98 | 2007 | 238 | 12 | 58 | 41.121 | S | 0.500 | 0.065  |
| S05C | 2007 | 238 | 12 | 58 | 23.741 | S | 0.500 | -0.430 |
| SHO  | 2007 | 238 | 12 | 58 | 44.880 | S | 0.500 | 0.323  |
| HELL | 2007 | 238 | 12 | 58 | 28.188 | S | 0.500 | -1.253 |
| R04C | 2007 | 238 | 12 | 58 | 25.512 | S | 0.500 | -0.250 |
| SNB7 | 2007 | 238 | 12 | 58 | 37.121 | S | 0.500 | 0.010  |
| K11A | 2007 | 238 | 12 | 59 | 26.448 | S | 0.500 | -0.345 |
| CWC  | 2007 | 238 | 12 | 58 | 35.356 | S | 0.500 | 0.378  |
| TPNV | 2007 | 238 | 12 | 58 | 51.040 | S | 0.500 | -0.126 |
| K07A | 2007 | 238 | 12 | 59 | 6.237  | S | 0.500 | 0.096  |
| SNB9 | 2007 | 238 | 12 | 58 | 43.211 | S | 0.500 | 0.371  |
| WDC  | 2007 | 238 | 12 | 58 | 30.150 | S | 0.500 | -0.738 |
| YO11 | 2007 | 238 | 12 | 58 | 34.971 | S | 0.500 | 0.215  |
| SNE4 | 2007 | 238 | 12 | 58 | 29.494 | S | 0.500 | -0.094 |
| L10A | 2007 | 238 | 12 | 59 | 18.796 | S | 0.500 | -1.483 |
| N09A | 2007 | 238 | 12 | 59 | 5.237  | S | 0.500 | -0.596 |
| SLA  | 2007 | 238 | 12 | 58 | 37.633 | S | 0.500 | 0.412  |
| SND9 | 2007 | 238 | 12 | 58 | 42.607 | S | 0.500 | -0.483 |
| YBH  | 2007 | 238 | 12 | 58 | 38.301 | S | 0.500 | 0.387  |
| SNF8 | 2007 | 238 | 12 | 58 | 38.683 | S | 0.500 | -1.482 |
| SNF9 | 2007 | 238 | 12 | 58 | 41.276 | S | 0.500 | -1.269 |
| M02C | 2007 | 238 | 12 | 58 | 35.118 | S | 0.500 | 0.511  |
| S08C | 2007 | 238 | 12 | 58 | 42.443 | S | 0.500 | 1.410  |
| SNG7 | 2007 | 238 | 12 | 58 | 35.430 | S | 0.500 | -1.589 |
| J08A | 2007 | 238 | 12 | 59 | 15.098 | S | 0.500 | -0.037 |
| SND4 | 2007 | 238 | 12 | 58 | 29.490 | S | 0.500 | -0.124 |
| SNC5 | 2007 | 238 | 12 | 58 | 31.949 | S | 0.500 | -0.488 |
| K08A | 2007 | 238 | 12 | 59 | 10.984 | S | 0.500 | -0.362 |
| R09A | 2007 | 238 | 12 | 58 | 53.220 | S | 0.500 | -0.047 |

|      |      |     |    |    |        |   |       |        |
|------|------|-----|----|----|--------|---|-------|--------|
| S09A | 2007 | 238 | 12 | 58 | 48.629 | S | 0.500 | -0.271 |
| SNE5 | 2007 | 238 | 12 | 58 | 31.735 | S | 0.500 | -0.404 |
| WVOR | 2007 | 238 | 12 | 59 | 8.071  | S | 0.500 | -0.268 |
| SNE9 | 2007 | 238 | 12 | 58 | 42.284 | S | 0.500 | -0.950 |
| SNB3 | 2007 | 238 | 12 | 58 | 27.593 | S | 0.500 | -0.115 |
| L08A | 2007 | 238 | 12 | 59 | 8.181  | S | 0.500 | -0.642 |
| YO02 | 2007 | 238 | 12 | 58 | 31.186 | S | 0.500 | -0.274 |
| YO08 | 2007 | 238 | 12 | 58 | 33.398 | S | 0.500 | 0.067  |
| WCN  | 2007 | 238 | 12 | 58 | 41.656 | S | 0.500 | 0.477  |
| SNA7 | 2007 | 238 | 12 | 58 | 39.002 | S | 0.500 | 0.411  |
| YO09 | 2007 | 238 | 12 | 58 | 33.915 | S | 0.500 | 0.175  |
| CMB  | 2007 | 238 | 12 | 58 | 28.529 | S | 0.500 | 0.235  |
| SNG5 | 2007 | 238 | 12 | 58 | 30.827 | S | 0.500 | -0.869 |
| N08A | 2007 | 238 | 12 | 59 | 0.602  | S | 0.500 | -0.751 |
| SNA4 | 2007 | 238 | 12 | 58 | 30.719 | S | 0.500 | 0.314  |
| SN97 | 2007 | 238 | 12 | 58 | 38.202 | S | 0.500 | 0.347  |
| SNA3 | 2007 | 238 | 12 | 58 | 28.771 | S | 0.500 | 0.487  |
| SNC6 | 2007 | 238 | 12 | 58 | 34.559 | S | 0.500 | -0.532 |
| SND8 | 2007 | 238 | 12 | 58 | 39.910 | S | 0.500 | -0.276 |
| LAVA | 2007 | 238 | 12 | 58 | 30.665 | S | 0.500 | 0.096  |
| YO10 | 2007 | 238 | 12 | 58 | 34.345 | S | 0.500 | 0.123  |
| SNC7 | 2007 | 238 | 12 | 58 | 36.837 | S | 0.500 | -0.243 |
| P05C | 2007 | 238 | 12 | 58 | 35.226 | S | 0.500 | -0.121 |
| SNF6 | 2007 | 238 | 12 | 58 | 33.928 | S | 0.500 | -0.820 |
| SND7 | 2007 | 238 | 12 | 58 | 37.240 | S | 0.500 | -0.555 |
| YO07 | 2007 | 238 | 12 | 58 | 33.099 | S | 0.500 | 0.096  |
| SN63 | 2007 | 238 | 12 | 58 | 30.513 | S | 0.500 | -0.209 |
| YO05 | 2007 | 238 | 12 | 58 | 32.297 | S | 0.500 | -0.186 |
| R05C | 2007 | 238 | 12 | 58 | 35.557 | S | 0.500 | 0.214  |
| SN64 | 2007 | 238 | 12 | 58 | 32.917 | S | 0.500 | 0.068  |
| T06C | 2007 | 238 | 12 | 58 | 26.153 | S | 0.500 | -0.250 |
| SN93 | 2007 | 238 | 12 | 58 | 28.154 | S | 0.500 | 0.761  |
| YO06 | 2007 | 238 | 12 | 58 | 33.098 | S | 0.500 | 0.119  |
| YO01 | 2007 | 238 | 12 | 58 | 30.814 | S | 0.500 | -0.132 |
| O08A | 2007 | 238 | 12 | 58 | 57.582 | S | 0.500 | -0.736 |
| KCC  | 2007 | 238 | 12 | 58 | 31.544 | S | 0.500 | 0.120  |
| SN96 | 2007 | 238 | 12 | 58 | 34.083 | S | 0.500 | -0.027 |
| SNE6 | 2007 | 238 | 12 | 58 | 34.398 | S | 0.500 | -0.648 |
| S06C | 2007 | 238 | 12 | 58 | 31.114 | S | 0.500 | -0.323 |
| YO03 | 2007 | 238 | 12 | 58 | 31.519 | S | 0.500 | -0.170 |
| YO04 | 2007 | 238 | 12 | 58 | 31.977 | S | 0.500 | -0.163 |

|      |      |     |    |         |          |           |         |        |        |
|------|------|-----|----|---------|----------|-----------|---------|--------|--------|
| 1997 | 190  | 19  | 24 | 27.8816 | 10.59800 | -63.48600 | 19.9000 | 10     | 14.712 |
| FLL  | 1997 | 190 | 19 | 41      | 58.766   | F         | 0.500   | 0.889  |        |
| CMB  | 1997 | 190 | 19 | 42      | 15.208   | F         | 0.500   | 1.068  |        |
| BRR  | 1997 | 190 | 19 | 41      | 57.552   | F         | 0.500   | 0.338  |        |
| SNCC | 1997 | 190 | 19 | 41      | 52.814   | F         | 0.500   | 0.406  |        |
| SFT  | 1997 | 190 | 19 | 41      | 45.610   | F         | 0.500   | 0.474  |        |
| WVOR | 1997 | 190 | 19 | 42      | 9.094    | F         | 0.500   | -2.684 |        |
| PDC  | 1997 | 190 | 19 | 41      | 54.238   | F         | 0.500   | 0.428  |        |
| BPC  | 1997 | 190 | 19 | 41      | 53.268   | F         | 0.500   | 1.419  |        |
| WMD  | 1997 | 190 | 19 | 41      | 49.638   | F         | 0.500   | -1.072 |        |
| SLC  | 1997 | 190 | 19 | 41      | 42.108   | F         | 0.500   | -0.430 |        |
| WHP  | 1997 | 190 | 19 | 41      | 47.524   | F         | 0.500   | -0.487 |        |
| ARC2 | 1997 | 190 | 19 | 41      | 46.481   | F         | 0.500   | -1.099 |        |
| GSC  | 1997 | 190 | 19 | 41      | 30.437   | F         | 0.500   | 1.665  |        |
| SRF  | 1997 | 190 | 19 | 41      | 46.856   | F         | 0.500   | -0.921 |        |
| TENV | 1997 | 190 | 19 | 41      | 27.793   | F         | 0.500   | -0.537 |        |
| DGR  | 1997 | 190 | 19 | 41      | 25.939   | F         | 0.500   | -0.081 |        |
| SFK  | 1997 | 190 | 19 | 41      | 51.993   | F         | 0.500   | -1.217 |        |
| TWR2 | 1997 | 190 | 19 | 41      | 48.433   | F         | 0.500   | -0.694 |        |
| VTV  | 1997 | 190 | 19 | 41      | 32.425   | F         | 0.500   | 0.287  |        |
| DP00 | 1997 | 190 | 19 | 41      | 42.643   | F         | 0.500   | 1.890  |        |

|      |      |     |    |         |           |   |            |         |    |        |
|------|------|-----|----|---------|-----------|---|------------|---------|----|--------|
| CWC  | 1997 | 190 | 19 | 41      | 47.988    | F | 0.500      | 2.064   |    |        |
| CPR  | 1997 | 190 | 19 | 41      | 51.248    | F | 0.500      | -0.882  |    |        |
| OVY  | 1997 | 190 | 19 | 41      | 49.216    | F | 0.500      | -0.697  |    |        |
| JUN  | 1997 | 190 | 19 | 41      | 48.976    | F | 0.500      | -1.018  |    |        |
| SMD  | 1997 | 190 | 19 | 41      | 51.995    | F | 0.500      | -1.243  |    |        |
| BVC  | 1997 | 190 | 19 | 41      | 46.315    | F | 0.500      | 2.133   |    |        |
| 1997 | 191  | 14  | 55 | 58.2992 | -22.73300 |   | -70.89400  | 33.0000 | 11 | 8.859  |
| ARC2 | 1997 | 191 | 15 | 17      | 3.882     | F | 0.500      | 5.898   |    |        |
| 1997 | 210  | 17  | 40 | 16.6258 | 1.53500   |   | -90.96700  | 10.0000 | 15 | 10.466 |
| LMC  | 1997 | 210 | 17 | 54      | 46.302    | F | 0.500      | -0.234  |    |        |
| VTV  | 1997 | 210 | 17 | 54      | 13.468    | F | 0.500      | -0.078  |    |        |
| GSC  | 1997 | 210 | 17 | 54      | 17.799    | F | 0.500      | 0.410   |    |        |
| SFT  | 1997 | 210 | 17 | 54      | 39.240    | F | 0.500      | 1.454   |    |        |
| BRR  | 1997 | 210 | 17 | 54      | 52.834    | F | 0.500      | 0.031   |    |        |
| CPR  | 1997 | 210 | 17 | 54      | 48.102    | F | 0.500      | 0.144   |    |        |
| BGR  | 1997 | 210 | 17 | 54      | 48.859    | F | 0.500      | -0.627  |    |        |
| DGR  | 1997 | 210 | 17 | 54      | 0.793     | F | 0.500      | -0.103  |    |        |
| CMB  | 1997 | 210 | 17 | 55      | 14.978    | F | 0.500      | -0.341  |    |        |
| FLL  | 1997 | 210 | 17 | 54      | 56.775    | F | 0.500      | 0.303   |    |        |
| WMD  | 1997 | 210 | 17 | 54      | 42.430    | F | 0.500      | 0.655   |    |        |
| SMD  | 1997 | 210 | 17 | 54      | 50.514    | F | 0.500      | 0.112   |    |        |
| PDC  | 1997 | 210 | 17 | 54      | 42.923    | F | 0.500      | 0.205   |    |        |
| JUN  | 1997 | 210 | 17 | 54      | 44.915    | F | 0.500      | 0.369   |    |        |
| DP00 | 1997 | 210 | 17 | 54      | 35.810    | F | 0.500      | 0.881   |    |        |
| HVY  | 1997 | 210 | 17 | 54      | 51.967    | F | 0.500      | -0.658  |    |        |
| WVOR | 1997 | 210 | 17 | 55      | 46.287    | F | 0.500      | -3.625  |    |        |
| TWR2 | 1997 | 210 | 17 | 54      | 42.991    | F | 0.500      | 1.100   |    |        |
| 1997 | 220  | 22  | 27 | 30.5192 | -15.47700 |   | -179.14000 | 10.0000 | 16 | 10.669 |
| CPR  | 1997 | 220 | 22 | 49      | 13.996    | F | 0.500      | -1.040  |    |        |
| JUN  | 1997 | 220 | 22 | 49      | 14.290    | F | 0.500      | -1.040  |    |        |
| PDC  | 1997 | 220 | 22 | 49      | 7.371     | F | 0.500      | 0.153   |    |        |
| MLAC | 1997 | 220 | 22 | 49      | 20.369    | F | 0.500      | 2.668   |    |        |
| TIN  | 1997 | 220 | 22 | 49      | 21.489    | F | 0.500      | 2.592   |    |        |
| SLC  | 1997 | 220 | 22 | 49      | 19.938    | F | 0.500      | -0.221  |    |        |
| DP00 | 1997 | 220 | 22 | 49      | 22.126    | F | 0.500      | 3.034   |    |        |
| SFK  | 1997 | 220 | 22 | 49      | 8.217     | F | 0.500      | -2.245  |    |        |
| OVY  | 1997 | 220 | 22 | 49      | 16.193    | F | 0.500      | -0.827  |    |        |
| BPC  | 1997 | 220 | 22 | 49      | 20.056    | F | 0.500      | 2.034   |    |        |
| WMD  | 1997 | 220 | 22 | 49      | 10.441    | F | 0.500      | -1.650  |    |        |
| MWC  | 1997 | 220 | 22 | 49      | 4.144     | F | 0.500      | -0.967  |    |        |
| SRF  | 1997 | 220 | 22 | 49      | 19.416    | F | 0.500      | 0.135   |    |        |
| DAC  | 1997 | 220 | 22 | 49      | 19.887    | F | 0.500      | 0.210   |    |        |
| VTV  | 1997 | 220 | 22 | 49      | 13.320    | F | 0.500      | 1.092   |    |        |
| PAS  | 1997 | 220 | 22 | 49      | 2.795     | F | 0.500      | -0.475  |    |        |
| BGR  | 1997 | 220 | 22 | 49      | 8.258     | F | 0.500      | -2.263  |    |        |
| LMC  | 1997 | 220 | 22 | 49      | 6.351     | F | 0.500      | -2.493  |    |        |
| ARC2 | 1997 | 220 | 22 | 49      | 11.998    | F | 0.500      | -0.708  |    |        |
| TWR2 | 1997 | 220 | 22 | 49      | 12.809    | F | 0.500      | -1.193  |    |        |
| CWC  | 1997 | 220 | 22 | 49      | 19.053    | F | 0.500      | 2.125   |    |        |
| SFT  | 1997 | 220 | 22 | 49      | 15.592    | F | 0.500      | -0.344  |    |        |
| FLL  | 1997 | 220 | 22 | 49      | 15.984    | F | 0.500      | 1.281   |    |        |
| PLM  | 1997 | 220 | 22 | 49      | 9.613     | F | 0.500      | -0.237  |    |        |
| CMB  | 1997 | 220 | 22 | 49      | 8.657     | F | 0.500      | 0.473   |    |        |
| SVD  | 1997 | 220 | 22 | 49      | 12.470    | F | 0.500      | 0.657   |    |        |
| WHP  | 1997 | 220 | 22 | 49      | 15.902    | F | 0.500      | -0.881  |    |        |
| CCC  | 1997 | 220 | 22 | 49      | 12.751    | F | 0.500      | 0.677   |    |        |
| SMD  | 1997 | 220 | 22 | 49      | 15.004    | F | 0.500      | -0.424  |    |        |
| HVY  | 1997 | 220 | 22 | 49      | 8.239     | F | 0.500      | -0.367  |    |        |
| BRR  | 1997 | 220 | 22 | 49      | 12.381    | F | 0.500      | 0.243   |    |        |

|      |      |     |    |         |           |            |         |        |        |
|------|------|-----|----|---------|-----------|------------|---------|--------|--------|
| 1997 | 241  | 6   | 54 | 14.7061 | -15.23500 | -175.57600 | 33.0000 | 18     | 14.466 |
| SVD  | 1997 | 241 | 7  | 15      | 20.748    | F          | 0.500   | 0.768  |        |
| TPNV | 1997 | 241 | 7  | 15      | 43.213    | F          | 0.500   | 0.333  |        |
| SRF  | 1997 | 241 | 7  | 15      | 28.914    | F          | 0.500   | -0.013 |        |
| GSC  | 1997 | 241 | 7  | 15      | 30.825    | F          | 0.500   | 1.746  |        |
| WHP  | 1997 | 241 | 7  | 15      | 25.710    | F          | 0.500   | -0.517 |        |
| BPC  | 1997 | 241 | 7  | 15      | 29.001    | F          | 0.500   | 1.244  |        |
| DP00 | 1997 | 241 | 7  | 15      | 30.027    | F          | 0.500   | 1.636  |        |
| OSI  | 1997 | 241 | 7  | 15      | 10.792    | F          | 0.500   | 0.646  |        |
| CWC  | 1997 | 241 | 7  | 15      | 27.684    | F          | 0.500   | 1.392  |        |
| SFT  | 1997 | 241 | 7  | 15      | 24.811    | F          | 0.500   | -0.377 |        |
| MWC  | 1997 | 241 | 7  | 15      | 13.190    | F          | 0.500   | -0.100 |        |
| SMD  | 1997 | 241 | 7  | 15      | 24.560    | F          | 0.500   | -0.510 |        |
| WMD  | 1997 | 241 | 7  | 15      | 19.880    | F          | 0.500   | -1.419 |        |
| CPR  | 1997 | 241 | 7  | 15      | 23.608    | F          | 0.500   | -0.972 |        |
| TWR2 | 1997 | 241 | 7  | 15      | 22.334    | F          | 0.500   | -0.976 |        |
| LMC  | 1997 | 241 | 7  | 15      | 16.218    | F          | 0.500   | -1.923 |        |
| PLM  | 1997 | 241 | 7  | 15      | 18.160    | F          | 0.500   | 0.529  |        |
| PDC  | 1997 | 241 | 7  | 15      | 16.246    | F          | 0.500   | -0.087 |        |
| JUN  | 1997 | 241 | 7  | 15      | 24.139    | F          | 0.500   | -0.623 |        |
| BGR  | 1997 | 241 | 7  | 15      | 18.323    | F          | 0.500   | -1.647 |        |
| FLL  | 1997 | 241 | 7  | 15      | 25.353    | F          | 0.500   | 0.861  |        |
| CMB  | 1997 | 241 | 7  | 15      | 19.039    | F          | 0.500   | 0.636  |        |
| BRR  | 1997 | 241 | 7  | 15      | 21.649    | F          | 0.500   | -0.087 |        |
| HVY  | 1997 | 241 | 7  | 15      | 17.549    | F          | 0.500   | -0.538 |        |

|      |      |     |    |        |          |           |         |        |        |
|------|------|-----|----|--------|----------|-----------|---------|--------|--------|
| 1997 | 281  | 21  | 21 | 9.8410 | 41.91100 | 144.81500 | 33.0000 | 20     | 10.061 |
| BPC  | 1997 | 281 | 21 | 41     | 37.389   | F         | 0.500   | 1.579  |        |
| CMB  | 1997 | 281 | 21 | 41     | 15.765   | F         | 0.500   | 1.314  |        |
| SLC  | 1997 | 281 | 21 | 41     | 44.685   | F         | 0.500   | -0.619 |        |
| TWR2 | 1997 | 281 | 21 | 41     | 40.684   | F         | 0.500   | -0.992 |        |
| CPR  | 1997 | 281 | 21 | 41     | 37.528   | F         | 0.500   | 0.445  |        |
| SFT  | 1997 | 281 | 21 | 41     | 44.814   | F         | 0.500   | -0.179 |        |
| CHP  | 1997 | 281 | 21 | 41     | 46.037   | F         | 0.500   | -1.315 |        |
| PDC  | 1997 | 281 | 21 | 41     | 37.747   | F         | 0.500   | -1.410 |        |
| WHP  | 1997 | 281 | 21 | 41     | 40.765   | F         | 0.500   | -0.649 |        |
| JUN  | 1997 | 281 | 21 | 41     | 39.840   | F         | 0.500   | -0.262 |        |
| HVY  | 1997 | 281 | 21 | 41     | 31.109   | F         | 0.500   | -0.778 |        |
| FLL  | 1997 | 281 | 21 | 41     | 32.137   | F         | 0.500   | 1.356  |        |
| SMD  | 1997 | 281 | 21 | 41     | 36.271   | F         | 0.500   | 0.858  |        |
| BRR  | 1997 | 281 | 21 | 41     | 32.545   | F         | 0.500   | -0.255 |        |
| TIN  | 1997 | 281 | 21 | 41     | 38.633   | F         | 0.500   | 0.906  |        |

|      |      |     |    |         |          |           |         |        |        |
|------|------|-----|----|---------|----------|-----------|---------|--------|--------|
| 2005 | 165  | 11  | 49 | 13.1641 | 51.01700 | 179.60100 | 47.5000 | 2      | 10.514 |
| CMB  | 2005 | 165 | 12 | 3       | 38.303   | F         | 0.500   | 0.698  |        |
| Q04C | 2005 | 165 | 12 | 3       | 21.858   | F         | 0.500   | 0.668  |        |
| SLA  | 2005 | 165 | 12 | 4       | 22.829   | F         | 0.500   | -2.297 |        |
| GSC  | 2005 | 165 | 12 | 4       | 33.654   | F         | 0.500   | -0.972 |        |
| SN57 | 2005 | 165 | 12 | 3       | 50.246   | F         | 0.500   | 0.404  |        |
| VCS  | 2005 | 165 | 12 | 4       | 30.629   | F         | 0.500   | 0.168  |        |
| GOR  | 2005 | 165 | 12 | 4       | 51.187   | F         | 0.500   | 0.692  |        |
| CWC  | 2005 | 165 | 12 | 4       | 14.012   | F         | 0.500   | 0.902  |        |
| SN67 | 2005 | 165 | 12 | 3       | 47.870   | F         | 0.500   | 0.642  |        |
| SN48 | 2005 | 165 | 12 | 3       | 54.909   | F         | 0.500   | 1.514  |        |
| MNV  | 2005 | 165 | 12 | 3       | 53.838   | F         | 0.500   | -0.777 |        |
| PIN  | 2005 | 165 | 12 | 2       | 44.294   | F         | 0.500   | -0.339 |        |
| SN26 | 2005 | 165 | 12 | 4       | 1.516    | F         | 0.500   | 2.351  |        |
| SPG  | 2005 | 165 | 12 | 4       | 7.951    | F         | 0.500   | -0.911 |        |
| SN38 | 2005 | 165 | 12 | 3       | 56.711   | F         | 0.500   | 0.374  |        |
| MOD  | 2005 | 165 | 12 | 3       | 4.328    | F         | 0.500   | -1.066 |        |
| T06C | 2005 | 165 | 12 | 3       | 52.233   | F         | 0.500   | -0.647 |        |
| ORV  | 2005 | 165 | 12 | 3       | 13.211   | F         | 0.500   | -0.716 |        |
| KCC  | 2005 | 165 | 12 | 3       | 54.122   | F         | 0.500   | 0.357  |        |

|      |      |     |    |   |        |   |       |        |
|------|------|-----|----|---|--------|---|-------|--------|
| O04C | 2005 | 165 | 12 | 3 | 11.312 | F | 0.500 | -0.155 |
| O05C | 2005 | 165 | 12 | 3 | 15.138 | F | 0.500 | -0.740 |
| SN71 | 2005 | 165 | 12 | 3 | 40.601 | F | 0.500 | -0.237 |
| SN37 | 2005 | 165 | 12 | 3 | 57.356 | F | 0.500 | 0.671  |
| SN51 | 2005 | 165 | 12 | 3 | 47.293 | F | 0.500 | -0.183 |
| HELL | 2005 | 165 | 12 | 4 | 1.748  | F | 0.500 | -0.583 |
| SN28 | 2005 | 165 | 12 | 4 | 0.150  | F | 0.500 | 0.878  |
| S05C | 2005 | 165 | 12 | 3 | 43.283 | F | 0.500 | -0.893 |
| SN11 | 2005 | 165 | 12 | 3 | 58.210 | F | 0.500 | -1.013 |
| SN47 | 2005 | 165 | 12 | 3 | 54.496 | F | 0.500 | 0.919  |
| P05C | 2005 | 165 | 12 | 3 | 23.599 | F | 0.500 | -1.120 |
| SN62 | 2005 | 165 | 12 | 3 | 45.120 | F | 0.500 | -0.064 |
| LAVA | 2005 | 165 | 12 | 3 | 27.794 | F | 0.500 | -0.271 |
| SN21 | 2005 | 165 | 12 | 3 | 55.995 | F | 0.500 | -0.424 |
| SN42 | 2005 | 165 | 12 | 3 | 52.012 | F | 0.500 | 0.001  |
| WDC  | 2005 | 165 | 12 | 2 | 56.316 | F | 0.500 | 0.943  |
| HAST | 2005 | 165 | 12 | 3 | 42.950 | F | 0.500 | 1.228  |

|      |      |     |    |         |           |            |         |        |       |
|------|------|-----|----|---------|-----------|------------|---------|--------|-------|
| 2005 | 219  | 11  | 35 | 31.5331 | -14.44900 | -177.29300 | 10.0000 | 9      | 5.393 |
| SAO  | 2005 | 219 | 11 | 56      | 25.822    | F          | 0.500   | -5.990 |       |

|      |      |     |    |         |           |           |          |        |        |
|------|------|-----|----|---------|-----------|-----------|----------|--------|--------|
| 2005 | 321  | 19  | 27 | 14.4786 | -22.36100 | -67.89500 | 147.0000 | 16     | 19.989 |
| O01C | 2005 | 321 | 19 | 49      | 12.829    | F         | 0.500    | 1.770  |        |
| P01C | 2005 | 321 | 19 | 49      | 5.181     | F         | 0.500    | 1.423  |        |
| P05C | 2005 | 321 | 19 | 48      | 45.915    | F         | 0.500    | 0.166  |        |
| Q03C | 2005 | 321 | 19 | 48      | 50.574    | F         | 0.500    | 0.824  |        |
| PIN  | 2005 | 321 | 19 | 49      | 18.928    | F         | 0.500    | 0.520  |        |
| HATC | 2005 | 321 | 19 | 49      | 0.346     | F         | 0.500    | -0.963 |        |
| M04C | 2005 | 321 | 19 | 49      | 8.916     | F         | 0.500    | -1.245 |        |
| HOPS | 2005 | 321 | 19 | 48      | 59.836    | F         | 0.500    | 1.191  |        |
| M03C | 2005 | 321 | 19 | 49      | 5.979     | F         | 0.500    | -2.328 |        |
| FARB | 2005 | 321 | 19 | 48      | 48.840    | F         | 0.500    | -0.938 |        |
| O03C | 2005 | 321 | 19 | 48      | 57.243    | F         | 0.500    | -1.738 |        |
| U05C | 2005 | 321 | 19 | 48      | 20.759    | F         | 0.500    | -0.690 |        |
| SUTB | 2005 | 321 | 19 | 48      | 51.866    | F         | 0.500    | -0.445 |        |
| MNRC | 2005 | 321 | 19 | 48      | 55.085    | F         | 0.500    | 1.065  |        |
| V03C | 2005 | 321 | 19 | 48      | 27.188    | F         | 0.500    | 0.466  |        |
| CVS  | 2005 | 321 | 19 | 48      | 50.283    | F         | 0.500    | -0.307 |        |
| ADO  | 2005 | 321 | 19 | 47      | 50.706    | F         | 0.500    | 0.237  |        |
| O04C | 2005 | 321 | 19 | 48      | 55.238    | F         | 0.500    | -0.437 |        |
| EDW2 | 2005 | 321 | 19 | 47      | 55.919    | F         | 0.500    | -0.904 |        |
| OSI  | 2005 | 321 | 19 | 47      | 59.307    | F         | 0.500    | -0.440 |        |
| ARV  | 2005 | 321 | 19 | 48      | 4.223     | F         | 0.500    | 0.257  |        |
| GRA  | 2005 | 321 | 19 | 48      | 9.516     | F         | 0.500    | 0.995  |        |
| ELFS | 2005 | 321 | 19 | 48      | 55.411    | F         | 0.500    | -0.351 |        |
| TOV  | 2005 | 321 | 19 | 47      | 57.367    | F         | 0.500    | 0.483  |        |
| BDM  | 2005 | 321 | 19 | 48      | 44.838    | F         | 0.500    | 0.651  |        |
| FUR  | 2005 | 321 | 19 | 48      | 1.815     | F         | 0.500    | 0.813  |        |
| M05C | 2005 | 321 | 19 | 49      | 2.034     | F         | 0.500    | -1.023 |        |
| LAVA | 2005 | 321 | 19 | 48      | 42.346    | F         | 0.500    | -0.323 |        |
| MPP  | 2005 | 321 | 19 | 48      | 9.215     | F         | 0.500    | -0.132 |        |
| PLM  | 2005 | 321 | 19 | 47      | 38.295    | F         | 0.500    | 0.612  |        |
| JCS  | 2005 | 321 | 19 | 47      | 34.168    | F         | 0.500    | 0.626  |        |
| PAS  | 2005 | 321 | 19 | 47      | 52.960    | F         | 0.500    | 0.603  |        |
| SN14 | 2005 | 321 | 19 | 48      | 18.240    | F         | 0.500    | -1.079 |        |
| SN55 | 2005 | 321 | 19 | 48      | 28.188    | F         | 0.500    | 0.095  |        |
| Q04C | 2005 | 321 | 19 | 48      | 46.698    | F         | 0.500    | -0.392 |        |
| O05C | 2005 | 321 | 19 | 48      | 52.197    | F         | 0.500    | 0.125  |        |
| T05C | 2005 | 321 | 19 | 48      | 28.643    | F         | 0.500    | -0.375 |        |
| CWC  | 2005 | 321 | 19 | 48      | 11.080    | F         | 0.500    | 1.912  |        |
| WVOR | 2005 | 321 | 19 | 48      | 55.535    | F         | 0.500    | -0.609 |        |
| MPM  | 2005 | 321 | 19 | 48      | 3.609     | F         | 0.500    | 1.059  |        |
| M06C | 2005 | 321 | 19 | 48      | 57.455    | F         | 0.500    | -0.550 |        |

|      |      |     |    |    |        |   |       |        |
|------|------|-----|----|----|--------|---|-------|--------|
| SNCC | 2005 | 321 | 19 | 47 | 55.258 | F | 0.500 | 0.206  |
| R04C | 2005 | 321 | 19 | 48 | 40.395 | F | 0.500 | 0.222  |
| VES  | 2005 | 321 | 19 | 48 | 10.528 | F | 0.500 | -0.559 |
| GASB | 2005 | 321 | 19 | 49 | 2.470  | F | 0.500 | 1.342  |
| VCS  | 2005 | 321 | 19 | 47 | 54.417 | F | 0.500 | -0.378 |
| MWC  | 2005 | 321 | 19 | 47 | 52.705 | F | 0.500 | 0.287  |
| GSC  | 2005 | 321 | 19 | 47 | 53.044 | F | 0.500 | 0.914  |
| SLA  | 2005 | 321 | 19 | 48 | 0.296  | F | 0.500 | 0.632  |
| RRX  | 2005 | 321 | 19 | 47 | 49.937 | F | 0.500 | -0.142 |
| MUR  | 2005 | 321 | 19 | 47 | 42.091 | F | 0.500 | 0.438  |
| S04C | 2005 | 321 | 19 | 48 | 37.845 | F | 0.500 | 0.368  |
| DJJ  | 2005 | 321 | 19 | 47 | 54.539 | F | 0.500 | 0.363  |
| SDP  | 2005 | 321 | 19 | 48 | 11.426 | F | 0.500 | -0.089 |
| RPV  | 2005 | 321 | 19 | 47 | 51.574 | F | 0.500 | 0.642  |
| LRL  | 2005 | 321 | 19 | 47 | 59.702 | F | 0.500 | 0.474  |
| HEC  | 2005 | 321 | 19 | 47 | 46.211 | F | 0.500 | 0.914  |
| CHF  | 2005 | 321 | 19 | 47 | 53.211 | F | 0.500 | 0.263  |
| DEC  | 2005 | 321 | 19 | 47 | 54.361 | F | 0.500 | 0.060  |
| HAST | 2005 | 321 | 19 | 48 | 31.693 | F | 0.500 | 0.232  |
| VTV  | 2005 | 321 | 19 | 47 | 49.814 | F | 0.500 | -0.145 |
| MLAC | 2005 | 321 | 19 | 48 | 22.982 | F | 0.500 | 0.141  |
| PACP | 2005 | 321 | 19 | 48 | 33.922 | F | 0.500 | -0.081 |
| SMM  | 2005 | 321 | 19 | 48 | 13.823 | F | 0.500 | 0.368  |
| ORV  | 2005 | 321 | 19 | 48 | 52.585 | F | 0.500 | 0.022  |
| SHO  | 2005 | 321 | 19 | 47 | 53.734 | F | 0.500 | 0.865  |
| BNLO | 2005 | 321 | 19 | 48 | 40.432 | F | 0.500 | -0.419 |
| R05C | 2005 | 321 | 19 | 48 | 38.446 | F | 0.500 | -0.269 |
| SN47 | 2005 | 321 | 19 | 48 | 25.569 | F | 0.500 | 0.920  |
| CIA  | 2005 | 321 | 19 | 47 | 49.140 | F | 0.500 | 0.637  |
| BBR  | 2005 | 321 | 19 | 47 | 46.208 | F | 0.500 | 1.186  |
| FMP  | 2005 | 321 | 19 | 47 | 50.680 | F | 0.500 | 0.590  |
| V05C | 2005 | 321 | 19 | 48 | 17.636 | F | 0.500 | 0.765  |
| SN26 | 2005 | 321 | 19 | 48 | 20.344 | F | 0.500 | 0.137  |
| DGR  | 2005 | 321 | 19 | 47 | 41.643 | F | 0.500 | 0.843  |
| SN37 | 2005 | 321 | 19 | 48 | 23.166 | F | 0.500 | 0.884  |
| SN48 | 2005 | 321 | 19 | 48 | 25.789 | F | 0.500 | 0.847  |
| SN25 | 2005 | 321 | 19 | 48 | 19.758 | F | 0.500 | -0.355 |
| SN65 | 2005 | 321 | 19 | 48 | 30.184 | F | 0.500 | 0.040  |
| U04C | 2005 | 321 | 19 | 48 | 26.294 | F | 0.500 | 0.236  |
| SVD  | 2005 | 321 | 19 | 47 | 45.916 | F | 0.500 | 1.202  |
| PKD  | 2005 | 321 | 19 | 48 | 22.389 | F | 0.500 | 0.719  |
| SN15 | 2005 | 321 | 19 | 48 | 18.691 | F | 0.500 | -0.312 |
| PHL  | 2005 | 321 | 19 | 48 | 17.589 | F | 0.500 | -0.343 |
| SN21 | 2005 | 321 | 19 | 48 | 18.272 | F | 0.500 | -2.531 |
| SN95 | 2005 | 321 | 19 | 48 | 36.929 | F | 0.500 | -0.104 |
| LGU  | 2005 | 321 | 19 | 47 | 58.650 | F | 0.500 | 0.419  |
| BFS  | 2005 | 321 | 19 | 47 | 50.393 | F | 0.500 | 0.534  |
| SN85 | 2005 | 321 | 19 | 48 | 34.860 | F | 0.500 | 0.105  |
| V04C | 2005 | 321 | 19 | 48 | 22.286 | F | 0.500 | 0.516  |
| CMB  | 2005 | 321 | 19 | 48 | 35.259 | F | 0.500 | -0.241 |
| SN36 | 2005 | 321 | 19 | 48 | 22.473 | F | 0.500 | 0.213  |
| SN52 | 2005 | 321 | 19 | 48 | 25.134 | F | 0.500 | -1.553 |
| R07C | 2005 | 321 | 19 | 48 | 28.360 | F | 0.500 | 0.923  |
| SN22 | 2005 | 321 | 19 | 48 | 19.313 | F | 0.500 | -2.249 |
| SN45 | 2005 | 321 | 19 | 48 | 25.427 | F | 0.500 | 0.308  |
| T06C | 2005 | 321 | 19 | 48 | 21.238 | F | 0.500 | -2.306 |
| S05C | 2005 | 321 | 19 | 48 | 28.663 | F | 0.500 | -1.295 |
| SN86 | 2005 | 321 | 19 | 48 | 35.776 | F | 0.500 | 0.289  |
| SN46 | 2005 | 321 | 19 | 48 | 25.318 | F | 0.500 | 0.693  |
| SN44 | 2005 | 321 | 19 | 48 | 23.900 | F | 0.500 | -0.956 |
| S06C | 2005 | 321 | 19 | 48 | 30.718 | F | 0.500 | -0.324 |
| TIN  | 2005 | 321 | 19 | 48 | 14.973 | F | 0.500 | 0.495  |
| SN73 | 2005 | 321 | 19 | 48 | 31.767 | F | 0.500 | -0.485 |

|      |      |     |    |    |        |   |       |        |
|------|------|-----|----|----|--------|---|-------|--------|
| SN84 | 2005 | 321 | 19 | 48 | 34.656 | F | 0.500 | -0.286 |
| SN27 | 2005 | 321 | 19 | 48 | 20.985 | F | 0.500 | 0.967  |
| SN38 | 2005 | 321 | 19 | 48 | 23.785 | F | 0.500 | 1.014  |
| RCT  | 2005 | 321 | 19 | 48 | 13.872 | F | 0.500 | -1.675 |
| SN56 | 2005 | 321 | 19 | 48 | 28.192 | F | 0.500 | 0.471  |
| SN67 | 2005 | 321 | 19 | 48 | 30.749 | F | 0.500 | 1.022  |
| R06C | 2005 | 321 | 19 | 48 | 33.973 | F | 0.500 | 0.770  |
| SN12 | 2005 | 321 | 19 | 48 | 17.484 | F | 0.500 | -1.262 |
| KCC  | 2005 | 321 | 19 | 48 | 22.270 | F | 0.500 | -1.335 |
| SN71 | 2005 | 321 | 19 | 48 | 31.888 | F | 0.500 | -0.707 |
| SN64 | 2005 | 321 | 19 | 48 | 29.521 | F | 0.500 | -0.315 |
| SN62 | 2005 | 321 | 19 | 48 | 28.758 | F | 0.500 | -0.970 |
| SN23 | 2005 | 321 | 19 | 48 | 20.244 | F | 0.500 | -1.417 |
| SN34 | 2005 | 321 | 19 | 48 | 21.474 | F | 0.500 | -1.136 |
| SN11 | 2005 | 321 | 19 | 48 | 16.639 | F | 0.500 | -1.983 |
| SN28 | 2005 | 321 | 19 | 48 | 21.514 | F | 0.500 | 0.955  |
| SN51 | 2005 | 321 | 19 | 48 | 26.054 | F | 0.500 | -1.673 |
| SN76 | 2005 | 321 | 19 | 48 | 33.356 | F | 0.500 | 0.810  |
| SN43 | 2005 | 321 | 19 | 48 | 24.227 | F | 0.500 | -1.303 |
| SN75 | 2005 | 321 | 19 | 48 | 32.425 | F | 0.500 | 0.270  |
| HELL | 2005 | 321 | 19 | 48 | 15.773 | F | 0.500 | -1.117 |
| S08C | 2005 | 321 | 19 | 48 | 18.754 | F | 0.500 | 0.865  |
| SN54 | 2005 | 321 | 19 | 48 | 27.588 | F | 0.500 | -0.304 |
| SN53 | 2005 | 321 | 19 | 48 | 26.320 | F | 0.500 | -0.903 |
| SN66 | 2005 | 321 | 19 | 48 | 31.066 | F | 0.500 | 0.894  |
| SN16 | 2005 | 321 | 19 | 48 | 17.682 | F | 0.500 | 0.608  |

|      |      |    |   |         |          |           |        |       |       |
|------|------|----|---|---------|----------|-----------|--------|-------|-------|
| 2007 | 97   | 7  | 9 | 28.3554 | 37.30600 | -24.49400 | 8.0000 | 47    | 2.985 |
| KCC  | 2007 | 97 | 7 | 30      | 19.092   | F         | 0.500  | 5.306 |       |

|      |      |     |    |         |           |            |         |        |        |
|------|------|-----|----|---------|-----------|------------|---------|--------|--------|
| 2007 | 103  | 18  | 24 | 29.1869 | -35.05100 | -108.83600 | 10.0000 | 48     | 10.027 |
| SN74 | 2007 | 103 | 18 | 45      | 30.727    | F          | 0.500   | -0.117 |        |
| OSI  | 2007 | 103 | 18 | 44      | 49.142    | F          | 0.500   | -1.438 |        |
| M03C | 2007 | 103 | 18 | 46      | 8.113     | F          | 0.500   | -1.711 |        |
| EDW2 | 2007 | 103 | 18 | 44      | 50.417    | F          | 0.500   | -2.306 |        |
| L09A | 2007 | 103 | 18 | 46      | 10.324    | F          | 0.500   | -1.586 |        |
| O02C | 2007 | 103 | 18 | 45      | 59.667    | F          | 0.500   | 0.519  |        |
| FUR  | 2007 | 103 | 18 | 45      | 10.107    | F          | 0.500   | 0.880  |        |
| I06A | 2007 | 103 | 18 | 46      | 34.843    | F          | 0.500   | -0.466 |        |
| SND5 | 2007 | 103 | 18 | 45      | 44.959    | F          | 0.500   | -0.294 |        |
| M08A | 2007 | 103 | 18 | 46      | 6.655     | F          | 0.500   | 0.191  |        |
| SNB9 | 2007 | 103 | 18 | 45      | 46.388    | F          | 0.500   | 0.690  |        |
| LRL  | 2007 | 103 | 18 | 44      | 58.713    | F          | 0.500   | -0.438 |        |
| SN34 | 2007 | 103 | 18 | 45      | 22.102    | F          | 0.500   | -1.004 |        |
| TPNV | 2007 | 103 | 18 | 45      | 15.595    | F          | 0.500   | 1.278  |        |
| SNE9 | 2007 | 103 | 18 | 45      | 54.034    | F          | 0.500   | 0.389  |        |
| BFS  | 2007 | 103 | 18 | 44      | 45.077    | F          | 0.500   | 0.132  |        |
| SNF8 | 2007 | 103 | 18 | 45      | 54.333    | F          | 0.500   | 0.107  |        |
| SND4 | 2007 | 103 | 18 | 45      | 43.411    | F          | 0.500   | -0.579 |        |
| ISA  | 2007 | 103 | 18 | 45      | 2.654     | F          | 0.500   | 0.240  |        |
| GRA  | 2007 | 103 | 18 | 45      | 16.997    | F          | 0.500   | 0.983  |        |
| MPM  | 2007 | 103 | 18 | 45      | 6.260     | F          | 0.500   | 0.384  |        |
| SNE6 | 2007 | 103 | 18 | 45      | 48.434    | F          | 0.500   | -0.153 |        |
| M02C | 2007 | 103 | 18 | 46      | 11.343    | F          | 0.500   | -0.944 |        |
| K07A | 2007 | 103 | 18 | 46      | 21.105    | F          | 0.500   | 0.091  |        |
| SN75 | 2007 | 103 | 18 | 45      | 33.026    | F          | 0.500   | 0.711  |        |
| Q08A | 2007 | 103 | 18 | 45      | 38.325    | F          | 0.500   | 0.572  |        |
| R09A | 2007 | 103 | 18 | 45      | 30.831    | F          | 0.500   | 0.865  |        |
| SNB3 | 2007 | 103 | 18 | 45      | 38.661    | F          | 0.500   | 0.221  |        |
| SND9 | 2007 | 103 | 18 | 45      | 52.416    | F          | 0.500   | 1.208  |        |
| O06A | 2007 | 103 | 18 | 45      | 54.910    | F          | 0.500   | 0.363  |        |
| R06C | 2007 | 103 | 18 | 45      | 37.711    | F          | 0.500   | 1.568  |        |
| L07A | 2007 | 103 | 18 | 46      | 14.211    | F          | 0.500   | 0.362  |        |



|      |      |     |    |    |        |   |       |        |
|------|------|-----|----|----|--------|---|-------|--------|
| SNC6 | 2007 | 103 | 18 | 45 | 43.805 | F | 0.500 | -0.044 |
| SN84 | 2007 | 103 | 18 | 45 | 33.090 | F | 0.500 | 0.033  |
| S05C | 2007 | 103 | 18 | 45 | 23.492 | F | 0.500 | -0.420 |
| SNF6 | 2007 | 103 | 18 | 45 | 50.774 | F | 0.500 | -0.363 |
| SN96 | 2007 | 103 | 18 | 45 | 37.071 | F | 0.500 | 0.519  |
| SN93 | 2007 | 103 | 18 | 45 | 33.491 | F | 0.500 | 0.204  |
| SNE7 | 2007 | 103 | 18 | 45 | 52.440 | F | 0.500 | 0.342  |
| SN63 | 2007 | 103 | 18 | 45 | 27.467 | F | 0.500 | -0.340 |
| SNF9 | 2007 | 103 | 18 | 45 | 55.823 | F | 0.500 | 0.180  |
| SNG5 | 2007 | 103 | 18 | 45 | 52.005 | F | 0.500 | -0.195 |
| SN95 | 2007 | 103 | 18 | 45 | 34.858 | F | 0.500 | -0.394 |
| SNA3 | 2007 | 103 | 18 | 45 | 36.692 | F | 0.500 | 0.428  |
| SN64 | 2007 | 103 | 18 | 45 | 29.527 | F | 0.500 | 0.278  |
| N09A | 2007 | 103 | 18 | 45 | 59.159 | F | 0.500 | 0.003  |
| SN85 | 2007 | 103 | 18 | 45 | 34.750 | F | 0.500 | 0.433  |
| SNA4 | 2007 | 103 | 18 | 45 | 37.396 | F | 0.500 | -0.060 |
| R05C | 2007 | 103 | 18 | 45 | 39.485 | F | 0.500 | 0.180  |
| CMB  | 2007 | 103 | 18 | 45 | 32.149 | F | 0.500 | 0.189  |
| J09A | 2007 | 103 | 18 | 46 | 24.463 | F | 0.500 | -1.690 |

|      |      |     |    |         |          |           |         |        |        |
|------|------|-----|----|---------|----------|-----------|---------|--------|--------|
| 2007 | 159  | 13  | 32 | 12.3269 | 13.83500 | -90.76600 | 47.8000 | 52     | 11.557 |
| SN75 | 2007 | 159 | 13 | 44      | 34.620   | F         | 0.500   | 0.786  |        |
| I09A | 2007 | 159 | 13 | 45      | 9.961    | F         | 0.500   | -2.936 |        |
| DEC  | 2007 | 159 | 13 | 43      | 45.502   | F         | 0.500   | -0.316 |        |
| SLA  | 2007 | 159 | 13 | 43      | 48.904   | F         | 0.500   | -0.197 |        |
| R10A | 2007 | 159 | 13 | 44      | 3.749    | F         | 0.500   | 1.319  |        |
| K11A | 2007 | 159 | 13 | 44      | 45.464   | F         | 0.500   | -1.218 |        |
| HATC | 2007 | 159 | 13 | 45      | 14.396   | F         | 0.500   | 0.259  |        |
| K09A | 2007 | 159 | 13 | 44      | 58.615   | F         | 0.500   | -0.911 |        |
| MPP  | 2007 | 159 | 13 | 44      | 6.625    | F         | 0.500   | -0.734 |        |
| J10A | 2007 | 159 | 13 | 44      | 57.758   | F         | 0.500   | -1.639 |        |
| K08A | 2007 | 159 | 13 | 45      | 3.787    | F         | 0.500   | -2.530 |        |
| J08A | 2007 | 159 | 13 | 45      | 9.837    | F         | 0.500   | -2.674 |        |
| RRX  | 2007 | 159 | 13 | 43      | 36.610   | F         | 0.500   | -0.282 |        |
| DGR  | 2007 | 159 | 13 | 43      | 26.379   | F         | 0.500   | -0.047 |        |
| CIA  | 2007 | 159 | 13 | 43      | 38.790   | F         | 0.500   | -0.948 |        |
| TIN  | 2007 | 159 | 13 | 44      | 10.298   | F         | 0.500   | 1.140  |        |
| YBH  | 2007 | 159 | 13 | 45      | 30.691   | F         | 0.500   | -3.052 |        |
| K10A | 2007 | 159 | 13 | 44      | 52.732   | F         | 0.500   | -0.842 |        |
| L07A | 2007 | 159 | 13 | 45      | 5.228    | F         | 0.500   | -1.238 |        |
| SUTB | 2007 | 159 | 13 | 45      | 2.978    | F         | 0.500   | -0.229 |        |
| L02A | 2007 | 159 | 13 | 45      | 43.353   | F         | 0.500   | -1.999 |        |
| Q04C | 2007 | 159 | 13 | 44      | 56.599   | F         | 0.500   | 0.714  |        |
| J04A | 2007 | 159 | 13 | 45      | 40.181   | F         | 0.500   | -1.784 |        |
| SN87 | 2007 | 159 | 13 | 44      | 39.675   | F         | 0.500   | 1.666  |        |
| U10A | 2007 | 159 | 13 | 43      | 45.100   | F         | 0.500   | 0.816  |        |
| FUR  | 2007 | 159 | 13 | 43      | 50.278   | F         | 0.500   | 0.355  |        |
| DBO  | 2007 | 159 | 13 | 45      | 47.018   | F         | 0.500   | -3.496 |        |
| SNA7 | 2007 | 159 | 13 | 44      | 44.654   | F         | 0.500   | 1.147  |        |
| BBR  | 2007 | 159 | 13 | 43      | 30.762   | F         | 0.500   | -0.207 |        |
| RCT  | 2007 | 159 | 13 | 44      | 11.606   | F         | 0.500   | -1.072 |        |
| MUR  | 2007 | 159 | 13 | 43      | 27.726   | F         | 0.500   | -0.269 |        |
| WVOR | 2007 | 159 | 13 | 45      | 2.286    | F         | 0.500   | -2.258 |        |
| ELFS | 2007 | 159 | 13 | 45      | 6.312    | F         | 0.500   | 0.578  |        |
| GRA  | 2007 | 159 | 13 | 44      | 0.770    | F         | 0.500   | 0.700  |        |
| ARV  | 2007 | 159 | 13 | 43      | 57.763   | F         | 0.500   | -0.590 |        |
| SN63 | 2007 | 159 | 13 | 44      | 30.612   | F         | 0.500   | -0.564 |        |
| M05C | 2007 | 159 | 13 | 45      | 15.289   | F         | 0.500   | -0.871 |        |
| R04C | 2007 | 159 | 13 | 44      | 47.016   | F         | 0.500   | 0.451  |        |
| T06C | 2007 | 159 | 13 | 44      | 21.029   | F         | 0.500   | -2.477 |        |
| SND9 | 2007 | 159 | 13 | 44      | 53.001   | F         | 0.500   | 1.120  |        |
| L10A | 2007 | 159 | 13 | 44      | 42.608   | F         | 0.500   | -0.264 |        |
| PASC | 2007 | 159 | 13 | 43      | 43.155   | F         | 0.500   | -0.398 |        |

|      |      |     |    |    |        |   |       |        |
|------|------|-----|----|----|--------|---|-------|--------|
| HAST | 2007 | 159 | 13 | 44 | 38.042 | F | 0.500 | 0.405  |
| ISA  | 2007 | 159 | 13 | 43 | 59.268 | F | 0.500 | -0.134 |
| N10A | 2007 | 159 | 13 | 44 | 28.961 | F | 0.500 | 0.021  |
| MWC  | 2007 | 159 | 13 | 43 | 41.922 | F | 0.500 | -0.866 |
| MPM  | 2007 | 159 | 13 | 43 | 53.118 | F | 0.500 | 0.226  |
| WCN  | 2007 | 159 | 13 | 44 | 46.417 | F | 0.500 | 1.692  |
| HEC  | 2007 | 159 | 13 | 43 | 29.557 | F | 0.500 | -0.035 |
| SNC5 | 2007 | 159 | 13 | 44 | 52.230 | F | 0.500 | 0.528  |
| SND4 | 2007 | 159 | 13 | 44 | 56.244 | F | 0.500 | 0.630  |
| LRL  | 2007 | 159 | 13 | 43 | 49.434 | F | 0.500 | -0.166 |
| I04A | 2007 | 159 | 13 | 45 | 46.346 | F | 0.500 | -2.968 |
| BFS  | 2007 | 159 | 13 | 43 | 37.894 | F | 0.500 | -0.718 |
| S10A | 2007 | 159 | 13 | 44 | 2.304  | F | 0.500 | 0.720  |
| SND8 | 2007 | 159 | 13 | 44 | 53.359 | F | 0.500 | 1.135  |
| R07C | 2007 | 159 | 13 | 44 | 28.672 | F | 0.500 | 1.855  |
| SN97 | 2007 | 159 | 13 | 44 | 42.098 | F | 0.500 | 1.284  |
| R09A | 2007 | 159 | 13 | 44 | 10.696 | F | 0.500 | 1.458  |
| SNA3 | 2007 | 159 | 13 | 44 | 46.003 | F | 0.500 | 0.511  |
| K02A | 2007 | 159 | 13 | 45 | 46.937 | F | 0.500 | -2.815 |
| SNB5 | 2007 | 159 | 13 | 44 | 48.708 | F | 0.500 | 0.706  |
| SND5 | 2007 | 159 | 13 | 44 | 55.409 | F | 0.500 | 0.675  |
| Q10A | 2007 | 159 | 13 | 44 | 10.035 | F | 0.500 | 1.252  |
| SHO  | 2007 | 159 | 13 | 43 | 39.413 | F | 0.500 | 0.687  |
| SNB3 | 2007 | 159 | 13 | 44 | 50.131 | F | 0.500 | 0.421  |
| S09A | 2007 | 159 | 13 | 44 | 6.058  | F | 0.500 | 0.404  |
| GSC  | 2007 | 159 | 13 | 43 | 38.938 | F | 0.500 | 0.107  |
| SNG7 | 2007 | 159 | 13 | 45 | 5.849  | F | 0.500 | 0.614  |
| R08A | 2007 | 159 | 13 | 44 | 21.733 | F | 0.500 | 1.745  |
| SNE4 | 2007 | 159 | 13 | 44 | 59.284 | F | 0.500 | 0.293  |
| N09A | 2007 | 159 | 13 | 44 | 38.983 | F | 0.500 | -0.165 |
| O04C | 2007 | 159 | 13 | 45 | 7.074  | F | 0.500 | 0.730  |
| SNA4 | 2007 | 159 | 13 | 44 | 45.586 | F | 0.500 | 0.663  |
| R06C | 2007 | 159 | 13 | 44 | 36.534 | F | 0.500 | 1.815  |
| R05C | 2007 | 159 | 13 | 44 | 43.243 | F | 0.500 | 0.640  |
| BEK  | 2007 | 159 | 13 | 44 | 56.545 | F | 0.500 | 1.070  |
| O09A | 2007 | 159 | 13 | 44 | 29.752 | F | 0.500 | 0.418  |
| SNE9 | 2007 | 159 | 13 | 44 | 56.637 | F | 0.500 | 1.255  |
| SNE7 | 2007 | 159 | 13 | 44 | 59.056 | F | 0.500 | 0.760  |
| O05C | 2007 | 159 | 13 | 45 | 2.090  | F | 0.500 | 0.656  |
| SMM  | 2007 | 159 | 13 | 44 | 12.137 | F | 0.500 | -0.363 |
| HELL | 2007 | 159 | 13 | 44 | 13.812 | F | 0.500 | -0.045 |
| SN93 | 2007 | 159 | 13 | 44 | 42.330 | F | 0.500 | -0.110 |
| SNC6 | 2007 | 159 | 13 | 44 | 50.100 | F | 0.500 | 0.478  |
| S06C | 2007 | 159 | 13 | 44 | 32.581 | F | 0.500 | -0.249 |
| SNG5 | 2007 | 159 | 13 | 45 | 5.764  | F | 0.500 | 0.723  |
| SNB9 | 2007 | 159 | 13 | 44 | 45.139 | F | 0.500 | 1.368  |
| SN64 | 2007 | 159 | 13 | 44 | 31.139 | F | 0.500 | 0.230  |
| SNF6 | 2007 | 159 | 13 | 45 | 1.488  | F | 0.500 | 0.698  |
| S08C | 2007 | 159 | 13 | 44 | 14.507 | F | 0.500 | 1.325  |
| SN55 | 2007 | 159 | 13 | 44 | 28.870 | F | 0.500 | 0.855  |
| SNF8 | 2007 | 159 | 13 | 45 | 0.041  | F | 0.500 | 0.453  |
| SNE6 | 2007 | 159 | 13 | 44 | 57.499 | F | 0.500 | 0.918  |
| O08A | 2007 | 159 | 13 | 44 | 39.476 | F | 0.500 | 0.151  |
| SNF9 | 2007 | 159 | 13 | 44 | 59.662 | F | 0.500 | 0.986  |
| SVD  | 2007 | 159 | 13 | 43 | 31.242 | F | 0.500 | 0.061  |

|      |      |     |    |        |           |           |          |        |
|------|------|-----|----|--------|-----------|-----------|----------|--------|
| 2007 | 202  | 15  | 35 | 7.9389 | -22.15100 | -65.77700 | 289.5000 |        |
| BEK  | 2007 | 202 | 15 | 56     | 24.709    | F         | 0.500    | -0.129 |
| HATC | 2007 | 202 | 15 | 56     | 35.862    | F         | 0.500    | -1.804 |
| TPH  | 2007 | 202 | 15 | 55     | 54.013    | F         | 0.500    | 0.969  |
| U05C | 2007 | 202 | 15 | 55     | 58.742    | F         | 0.500    | -0.702 |
| T05C | 2007 | 202 | 15 | 56     | 6.268     | F         | 0.500    | -0.551 |
| CVS  | 2007 | 202 | 15 | 56     | 27.181    | F         | 0.500    | -0.709 |

|      |      |     |    |    |        |   |       |        |
|------|------|-----|----|----|--------|---|-------|--------|
| ARV  | 2007 | 202 | 15 | 55 | 42.216 | F | 0.500 | -0.182 |
| SDD  | 2007 | 202 | 15 | 55 | 24.207 | F | 0.500 | 0.817  |
| MOD  | 2007 | 202 | 15 | 56 | 39.643 | F | 0.500 | 1.834  |
| ELFS | 2007 | 202 | 15 | 56 | 31.396 | F | 0.500 | -0.781 |
| V03C | 2007 | 202 | 15 | 56 | 4.954  | F | 0.500 | 0.087  |
| WDC  | 2007 | 202 | 15 | 56 | 37.795 | F | 0.500 | -4.792 |
| BDM  | 2007 | 202 | 15 | 56 | 21.839 | F | 0.500 | 0.229  |
| ISA  | 2007 | 202 | 15 | 55 | 43.746 | F | 0.500 | -0.388 |
| P10A | 2007 | 202 | 15 | 55 | 59.639 | F | 0.500 | 0.187  |
| PHL  | 2007 | 202 | 15 | 55 | 55.973 | F | 0.500 | -0.340 |
| SN87 | 2007 | 202 | 15 | 56 | 13.085 | F | 0.500 | 0.241  |
| GASB | 2007 | 202 | 15 | 56 | 38.852 | F | 0.500 | 0.916  |
| K06A | 2007 | 202 | 15 | 56 | 43.139 | F | 0.500 | -0.322 |
| PKD  | 2007 | 202 | 15 | 56 | 0.219  | F | 0.500 | 0.387  |
| SVD  | 2007 | 202 | 15 | 55 | 24.834 | F | 0.500 | 1.367  |
| DBO  | 2007 | 202 | 15 | 57 | 0.125  | F | 0.500 | 2.442  |
| V04C | 2007 | 202 | 15 | 56 | 0.290  | F | 0.500 | 0.225  |
| R10A | 2007 | 202 | 15 | 55 | 50.123 | F | 0.500 | 1.361  |
| MPM  | 2007 | 202 | 15 | 55 | 40.991 | F | 0.500 | 0.423  |
| PACP | 2007 | 202 | 15 | 56 | 11.117 | F | 0.500 | -0.660 |
| T06C | 2007 | 202 | 15 | 55 | 58.744 | F | 0.500 | -2.529 |
| SNG7 | 2007 | 202 | 15 | 56 | 30.091 | F | 0.500 | -1.226 |
| HEC  | 2007 | 202 | 15 | 55 | 24.560 | F | 0.500 | 0.826  |
| PLM  | 2007 | 202 | 15 | 55 | 17.845 | F | 0.500 | 1.130  |
| FUR  | 2007 | 202 | 15 | 55 | 39.909 | F | 0.500 | 1.081  |
| RCT  | 2007 | 202 | 15 | 55 | 51.630 | F | 0.500 | -1.918 |
| K05A | 2007 | 202 | 15 | 56 | 46.597 | F | 0.500 | -0.309 |
| S09A | 2007 | 202 | 15 | 55 | 51.960 | F | 0.500 | 1.461  |
| DGR  | 2007 | 202 | 15 | 55 | 21.035 | F | 0.500 | 1.310  |
| R08A | 2007 | 202 | 15 | 56 | 1.238  | F | 0.500 | 0.570  |
| HAST | 2007 | 202 | 15 | 56 | 9.676  | F | 0.500 | 0.205  |
| SNE5 | 2007 | 202 | 15 | 56 | 24.941 | F | 0.500 | -1.554 |
| MUR  | 2007 | 202 | 15 | 55 | 21.561 | F | 0.500 | 0.937  |
| S10A | 2007 | 202 | 15 | 55 | 48.883 | F | 0.500 | 0.886  |
| Q10A | 2007 | 202 | 15 | 55 | 55.031 | F | 0.500 | 1.701  |
| P06A | 2007 | 202 | 15 | 56 | 21.193 | F | 0.500 | 0.302  |
| HELL | 2007 | 202 | 15 | 55 | 53.530 | F | 0.500 | -1.198 |
| SNC7 | 2007 | 202 | 15 | 56 | 21.260 | F | 0.500 | -0.437 |
| U04C | 2007 | 202 | 15 | 56 | 4.322  | F | 0.500 | 0.256  |
| OSI  | 2007 | 202 | 15 | 55 | 37.394 | F | 0.500 | -0.979 |
| J08A | 2007 | 202 | 15 | 56 | 37.450 | F | 0.500 | 0.348  |
| SNE6 | 2007 | 202 | 15 | 56 | 24.511 | F | 0.500 | -0.813 |
| CMB  | 2007 | 202 | 15 | 56 | 12.148 | F | 0.500 | -0.717 |
| SNB3 | 2007 | 202 | 15 | 56 | 19.073 | F | 0.500 | -0.872 |
| SND9 | 2007 | 202 | 15 | 56 | 22.959 | F | 0.500 | 0.435  |
| SNF9 | 2007 | 202 | 15 | 56 | 27.123 | F | 0.500 | -0.172 |
| TIN  | 2007 | 202 | 15 | 55 | 52.857 | F | 0.500 | 0.710  |
| BFS  | 2007 | 202 | 15 | 55 | 29.335 | F | 0.500 | 0.741  |
| SNE4 | 2007 | 202 | 15 | 56 | 25.216 | F | 0.500 | -1.417 |
| SNF8 | 2007 | 202 | 15 | 56 | 27.077 | F | 0.500 | -0.687 |
| L02A | 2007 | 202 | 15 | 56 | 57.342 | F | 0.500 | 2.038  |
| SNA4 | 2007 | 202 | 15 | 56 | 16.408 | F | 0.500 | -0.511 |
| MWC  | 2007 | 202 | 15 | 55 | 31.468 | F | 0.500 | 0.295  |
| SND8 | 2007 | 202 | 15 | 56 | 22.795 | F | 0.500 | 0.084  |
| FMP  | 2007 | 202 | 15 | 55 | 29.850 | F | 0.500 | 0.795  |
| SN97 | 2007 | 202 | 15 | 56 | 14.710 | F | 0.500 | 0.120  |
| U10A | 2007 | 202 | 15 | 55 | 36.349 | F | 0.500 | 1.044  |
| SNC6 | 2007 | 202 | 15 | 56 | 19.787 | F | 0.500 | -0.682 |
| SNA7 | 2007 | 202 | 15 | 56 | 16.508 | F | 0.500 | -0.147 |
| SN96 | 2007 | 202 | 15 | 56 | 13.534 | F | 0.500 | -0.302 |
| SNF6 | 2007 | 202 | 15 | 56 | 26.954 | F | 0.500 | -1.328 |
| I03A | 2007 | 202 | 15 | 57 | 5.222  | F | 0.500 | 4.123  |
| SND5 | 2007 | 202 | 15 | 56 | 22.617 | F | 0.500 | -1.098 |

|      |      |     |    |    |        |   |       |        |
|------|------|-----|----|----|--------|---|-------|--------|
| VTV  | 2007 | 202 | 15 | 55 | 28.367 | F | 0.500 | -0.184 |
| LAVA | 2007 | 202 | 15 | 56 | 18.874 | F | 0.500 | -0.892 |
| N09A | 2007 | 202 | 15 | 56 | 13.768 | F | 0.500 | -0.684 |
| CHF  | 2007 | 202 | 15 | 55 | 31.931 | F | 0.500 | 0.270  |
| SNG5 | 2007 | 202 | 15 | 56 | 29.814 | F | 0.500 | -1.199 |
| LRL  | 2007 | 202 | 15 | 55 | 37.515 | F | 0.500 | 0.028  |
| BBR  | 2007 | 202 | 15 | 55 | 24.958 | F | 0.500 | 1.246  |
| R09A | 2007 | 202 | 15 | 55 | 54.504 | F | 0.500 | 1.141  |
| SNE7 | 2007 | 202 | 15 | 56 | 26.251 | F | 0.500 | -0.608 |
| BMN  | 2007 | 202 | 15 | 56 | 8.662  | F | 0.500 | -0.961 |
| SLA  | 2007 | 202 | 15 | 55 | 38.333 | F | 0.500 | 0.598  |
| WCN  | 2007 | 202 | 15 | 56 | 18.310 | F | 0.500 | 0.742  |
| I09A | 2007 | 202 | 15 | 56 | 37.498 | F | 0.500 | 0.332  |
| SNB9 | 2007 | 202 | 15 | 56 | 17.414 | F | 0.500 | 0.325  |
| J05A | 2007 | 202 | 15 | 56 | 52.713 | F | 0.500 | 1.339  |
| YO08 | 2007 | 202 | 15 | 56 | 5.758  | F | 0.500 | -0.481 |
| SN55 | 2007 | 202 | 15 | 56 | 5.353  | F | 0.500 | -0.141 |
| TPNV | 2007 | 202 | 15 | 55 | 39.975 | F | 0.500 | 1.340  |
| SN93 | 2007 | 202 | 15 | 56 | 14.320 | F | 0.500 | -0.412 |
| YO07 | 2007 | 202 | 15 | 56 | 5.927  | F | 0.500 | -0.752 |
| PIN  | 2007 | 202 | 15 | 56 | 54.059 | F | 0.500 | 1.791  |
| SND4 | 2007 | 202 | 15 | 56 | 23.067 | F | 0.500 | -1.088 |
| R04C | 2007 | 202 | 15 | 56 | 17.365 | F | 0.500 | -0.101 |
| SN63 | 2007 | 202 | 15 | 56 | 6.001  | F | 0.500 | -1.239 |
| K09A | 2007 | 202 | 15 | 56 | 28.168 | F | 0.500 | -0.115 |
| J04A | 2007 | 202 | 15 | 56 | 55.925 | F | 0.500 | 1.700  |
| SNE9 | 2007 | 202 | 15 | 56 | 25.119 | F | 0.500 | 0.115  |
| YO09 | 2007 | 202 | 15 | 56 | 5.582  | F | 0.500 | -0.511 |
| YO01 | 2007 | 202 | 15 | 56 | 6.194  | F | 0.500 | -1.058 |
| YO05 | 2007 | 202 | 15 | 56 | 6.570  | F | 0.500 | -0.748 |
| SHO  | 2007 | 202 | 15 | 55 | 31.866 | F | 0.500 | 0.987  |
| YO10 | 2007 | 202 | 15 | 56 | 5.466  | F | 0.500 | -0.537 |
| P09A | 2007 | 202 | 15 | 56 | 2.466  | F | 0.500 | -0.686 |
| SNC5 | 2007 | 202 | 15 | 56 | 20.666 | F | 0.500 | -1.092 |
| YO02 | 2007 | 202 | 15 | 56 | 6.233  | F | 0.500 | -1.255 |
| GSC  | 2007 | 202 | 15 | 55 | 31.385 | F | 0.500 | 0.964  |
| YO11 | 2007 | 202 | 15 | 56 | 5.660  | F | 0.500 | -0.314 |
| YO06 | 2007 | 202 | 15 | 56 | 6.499  | F | 0.500 | -0.563 |
| SNA3 | 2007 | 202 | 15 | 56 | 16.809 | F | 0.500 | -0.346 |
| SN64 | 2007 | 202 | 15 | 56 | 6.702  | F | 0.500 | -0.546 |
| SND7 | 2007 | 202 | 15 | 56 | 24.523 | F | 0.500 | -0.275 |
| YO03 | 2007 | 202 | 15 | 56 | 6.328  | F | 0.500 | -1.058 |
| N08A | 2007 | 202 | 15 | 56 | 17.201 | F | 0.500 | -0.465 |
| R05C | 2007 | 202 | 15 | 56 | 15.325 | F | 0.500 | -0.489 |
| N06A | 2007 | 202 | 15 | 56 | 27.437 | F | 0.500 | 0.090  |
| J10A | 2007 | 202 | 15 | 56 | 28.260 | F | 0.500 | 0.335  |
| N07B | 2007 | 202 | 15 | 56 | 21.982 | F | 0.500 | -0.543 |
| YO04 | 2007 | 202 | 15 | 56 | 6.648  | F | 0.500 | -0.629 |
| I04A | 2007 | 202 | 15 | 56 | 58.467 | F | 0.500 | 1.283  |
| K11A | 2007 | 202 | 15 | 56 | 20.761 | F | 0.500 | 1.373  |
| K10A | 2007 | 202 | 15 | 56 | 24.902 | F | 0.500 | 0.706  |
| L10A | 2007 | 202 | 15 | 56 | 17.643 | F | 0.500 | 0.642  |

|      |      |    |   |         |          |           |         |        |        |
|------|------|----|---|---------|----------|-----------|---------|--------|--------|
| 2007 | 51   | 8  | 4 | 41.8881 | -1.03400 | 126.97600 | 12.0000 | 64     | 16.608 |
| SND5 | 2007 | 51 | 8 | 29      | 39.260   | F         | 0.500   | -1.075 |        |
| MOD  | 2007 | 51 | 8 | 29      | 46.339   | F         | 0.500   | 6.541  |        |
| SHO  | 2007 | 51 | 8 | 30      | 1.116    | F         | 0.500   | 2.533  |        |
| P09A | 2007 | 51 | 8 | 29      | 52.026   | F         | 0.500   | -0.148 |        |
| CWC  | 2007 | 51 | 8 | 29      | 53.650   | F         | 0.500   | 0.923  |        |
| U05C | 2007 | 51 | 8 | 29      | 46.029   | F         | 0.500   | 0.504  |        |
| TOV  | 2007 | 51 | 8 | 29      | 51.458   | F         | 0.500   | -0.616 |        |
| RRX  | 2007 | 51 | 8 | 29      | 58.959   | F         | 0.500   | 1.751  |        |
| U10A | 2007 | 51 | 8 | 30      | 0.728    | F         | 0.500   | 2.962  |        |

|      |      |    |   |    |        |   |       |        |
|------|------|----|---|----|--------|---|-------|--------|
| FUR  | 2007 | 51 | 8 | 29 | 57.816 | F | 0.500 | 2.010  |
| GSC  | 2007 | 51 | 8 | 29 | 59.926 | F | 0.500 | 2.253  |
| USC  | 2007 | 51 | 8 | 29 | 54.638 | F | 0.500 | 0.824  |
| ISA  | 2007 | 51 | 8 | 29 | 51.823 | F | 0.500 | 0.027  |
| HATC | 2007 | 51 | 8 | 29 | 35.242 | F | 0.500 | -1.869 |
| EDW2 | 2007 | 51 | 8 | 29 | 55.653 | F | 0.500 | 1.581  |
| M08A | 2007 | 51 | 8 | 29 | 45.814 | F | 0.500 | -0.392 |
| MPP  | 2007 | 51 | 8 | 29 | 49.468 | F | 0.500 | 1.039  |
| LRL  | 2007 | 51 | 8 | 29 | 56.364 | F | 0.500 | 1.658  |
| SNF6 | 2007 | 51 | 8 | 29 | 37.397 | F | 0.500 | -2.124 |
| DJJ  | 2007 | 51 | 8 | 29 | 53.601 | F | 0.500 | 0.404  |
| ARV  | 2007 | 51 | 8 | 29 | 52.590 | F | 0.500 | 1.585  |
| J04A | 2007 | 51 | 8 | 29 | 30.025 | F | 0.500 | -2.806 |
| U04C | 2007 | 51 | 8 | 29 | 43.811 | F | 0.500 | 0.243  |
| Q08A | 2007 | 51 | 8 | 29 | 51.684 | F | 0.500 | 1.054  |
| MCCM | 2007 | 51 | 8 | 29 | 32.998 | F | 0.500 | -1.577 |
| L05A | 2007 | 51 | 8 | 29 | 36.374 | F | 0.500 | -1.707 |
| SN14 | 2007 | 51 | 8 | 29 | 50.967 | F | 0.500 | 1.000  |
| GASB | 2007 | 51 | 8 | 29 | 34.499 | F | 0.500 | 0.274  |
| S08C | 2007 | 51 | 8 | 29 | 53.411 | F | 0.500 | 1.868  |
| I04A | 2007 | 51 | 8 | 29 | 27.943 | F | 0.500 | -2.879 |
| K02A | 2007 | 51 | 8 | 29 | 27.423 | F | 0.500 | -1.579 |
| VTV  | 2007 | 51 | 8 | 29 | 56.970 | F | 0.500 | 0.375  |
| MUR  | 2007 | 51 | 8 | 29 | 59.343 | F | 0.500 | 1.442  |
| SN55 | 2007 | 51 | 8 | 29 | 49.213 | F | 0.500 | 1.813  |
| DGR  | 2007 | 51 | 8 | 29 | 59.953 | F | 0.500 | 1.491  |
| FARB | 2007 | 51 | 8 | 29 | 32.741 | F | 0.500 | -1.792 |
| MWC  | 2007 | 51 | 8 | 29 | 55.137 | F | 0.500 | 0.150  |
| Q03C | 2007 | 51 | 8 | 29 | 37.805 | F | 0.500 | 0.721  |
| HELL | 2007 | 51 | 8 | 29 | 48.885 | F | 0.500 | -0.320 |
| SNE9 | 2007 | 51 | 8 | 29 | 40.837 | F | 0.500 | -1.485 |
| SN87 | 2007 | 51 | 8 | 29 | 45.980 | F | 0.500 | 0.353  |
| HUMO | 2007 | 51 | 8 | 29 | 28.601 | F | 0.500 | -1.825 |
| SNA7 | 2007 | 51 | 8 | 29 | 44.140 | F | 0.500 | -0.109 |
| SN98 | 2007 | 51 | 8 | 29 | 46.010 | F | 0.500 | 0.393  |
| BEK  | 2007 | 51 | 8 | 29 | 40.507 | F | 0.500 | -1.460 |
| SN95 | 2007 | 51 | 8 | 29 | 43.582 | F | 0.500 | -0.050 |
| SN64 | 2007 | 51 | 8 | 29 | 46.609 | F | 0.500 | 0.193  |
| I06A | 2007 | 51 | 8 | 29 | 36.951 | F | 0.500 | -0.679 |
| ELFS | 2007 | 51 | 8 | 29 | 38.692 | F | 0.500 | -0.985 |
| YBH  | 2007 | 51 | 8 | 29 | 30.781 | F | 0.500 | -1.235 |
| SNE5 | 2007 | 51 | 8 | 29 | 38.268 | F | 0.500 | -1.316 |
| I03A | 2007 | 51 | 8 | 29 | 25.874 | F | 0.500 | -2.521 |
| SNE6 | 2007 | 51 | 8 | 29 | 39.348 | F | 0.500 | -1.333 |
| SMM  | 2007 | 51 | 8 | 29 | 48.370 | F | 0.500 | 1.171  |
| SNG5 | 2007 | 51 | 8 | 29 | 35.738 | F | 0.500 | -1.994 |
| WCN  | 2007 | 51 | 8 | 29 | 44.556 | F | 0.500 | 0.310  |
| SNA3 | 2007 | 51 | 8 | 29 | 41.248 | F | 0.500 | -0.479 |
| SNB7 | 2007 | 51 | 8 | 29 | 42.812 | F | 0.500 | -0.616 |
| HAST | 2007 | 51 | 8 | 29 | 40.456 | F | 0.500 | -0.433 |
| SNB9 | 2007 | 51 | 8 | 29 | 45.236 | F | 0.500 | 0.528  |
| SN97 | 2007 | 51 | 8 | 29 | 44.633 | F | 0.500 | -0.022 |
| WVOR | 2007 | 51 | 8 | 29 | 44.075 | F | 0.500 | 0.034  |
| O06A | 2007 | 51 | 8 | 29 | 42.277 | F | 0.500 | -0.774 |
| SNC6 | 2007 | 51 | 8 | 29 | 42.023 | F | 0.500 | -0.350 |
| SND9 | 2007 | 51 | 8 | 29 | 42.164 | F | 0.500 | -0.835 |
| SNA8 | 2007 | 51 | 8 | 29 | 45.481 | F | 0.500 | 0.390  |
| SN75 | 2007 | 51 | 8 | 29 | 46.537 | F | 0.500 | 0.428  |
| K09A | 2007 | 51 | 8 | 29 | 46.764 | F | 0.500 | 0.110  |
| J08A | 2007 | 51 | 8 | 29 | 43.340 | F | 0.500 | -0.160 |
| K10A | 2007 | 51 | 8 | 29 | 49.772 | F | 0.500 | 0.797  |
| J06A | 2007 | 51 | 8 | 29 | 37.328 | F | 0.500 | -1.402 |
| WDC  | 2007 | 51 | 8 | 29 | 32.029 | F | 0.500 | -1.473 |

|      |      |    |   |    |        |   |       |        |
|------|------|----|---|----|--------|---|-------|--------|
| J09A | 2007 | 51 | 8 | 29 | 45.284 | F | 0.500 | -0.536 |
| LAVA | 2007 | 51 | 8 | 29 | 41.026 | F | 0.500 | -0.402 |
| SNC5 | 2007 | 51 | 8 | 29 | 40.756 | F | 0.500 | -0.343 |
| SNB6 | 2007 | 51 | 8 | 29 | 42.930 | F | 0.500 | -0.352 |
| SN96 | 2007 | 51 | 8 | 29 | 44.418 | F | 0.500 | -0.083 |
| SN85 | 2007 | 51 | 8 | 29 | 45.194 | F | 0.500 | 0.404  |

|      |     |   |    |         |          |           |         |    |        |
|------|-----|---|----|---------|----------|-----------|---------|----|--------|
| 2007 | 149 | 9 | 36 | 19.6493 | -1.06500 | 127.34300 | 24.0000 | 65 | 14.049 |
|------|-----|---|----|---------|----------|-----------|---------|----|--------|

|      |      |     |    |   |        |   |       |        |
|------|------|-----|----|---|--------|---|-------|--------|
| CHF  | 2007 | 149 | 10 | 1 | 29.073 | F | 0.500 | 1.000  |
| J02A | 2007 | 149 | 10 | 0 | 59.575 | F | 0.500 | -1.860 |
| M04C | 2007 | 149 | 10 | 1 | 7.605  | F | 0.500 | -0.604 |
| PASC | 2007 | 149 | 10 | 1 | 28.205 | F | 0.500 | 0.830  |
| OSI  | 2007 | 149 | 10 | 1 | 26.662 | F | 0.500 | 1.189  |
| SNF8 | 2007 | 149 | 10 | 1 | 12.923 | F | 0.500 | -1.274 |
| ARV  | 2007 | 149 | 10 | 1 | 26.324 | F | 0.500 | 2.046  |
| JRSC | 2007 | 149 | 10 | 1 | 9.851  | F | 0.500 | -0.955 |
| SN98 | 2007 | 149 | 10 | 1 | 19.231 | F | 0.500 | 0.300  |
| L08A | 2007 | 149 | 10 | 1 | 18.285 | F | 0.500 | -0.380 |
| S09A | 2007 | 149 | 10 | 1 | 29.574 | F | 0.500 | 2.293  |
| R06C | 2007 | 149 | 10 | 1 | 20.331 | F | 0.500 | 0.956  |
| PHL  | 2007 | 149 | 10 | 1 | 17.892 | F | 0.500 | -0.406 |
| SNF6 | 2007 | 149 | 10 | 1 | 11.401 | F | 0.500 | -1.417 |
| TIN  | 2007 | 149 | 10 | 1 | 25.756 | F | 0.500 | 0.939  |
| LRL  | 2007 | 149 | 10 | 1 | 30.115 | F | 0.500 | 2.113  |
| BNLO | 2007 | 149 | 10 | 1 | 10.570 | F | 0.500 | -0.760 |
| I08A | 2007 | 149 | 10 | 1 | 15.907 | F | 0.500 | -0.204 |
| WCN  | 2007 | 149 | 10 | 1 | 17.977 | F | 0.500 | 0.418  |
| K05A | 2007 | 149 | 10 | 1 | 9.301  | F | 0.500 | -1.023 |
| SNC6 | 2007 | 149 | 10 | 1 | 15.529 | F | 0.500 | -0.138 |
| HUMO | 2007 | 149 | 10 | 1 | 2.174  | F | 0.500 | -1.564 |
| L10A | 2007 | 149 | 10 | 1 | 25.496 | F | 0.500 | 0.891  |
| SND4 | 2007 | 149 | 10 | 1 | 11.984 | F | 0.500 | -1.059 |
| BDM  | 2007 | 149 | 10 | 1 | 11.459 | F | 0.500 | -0.055 |
| Q08A | 2007 | 149 | 10 | 1 | 24.980 | F | 0.500 | 1.008  |
| HOPS | 2007 | 149 | 10 | 1 | 7.188  | F | 0.500 | 0.491  |
| M02C | 2007 | 149 | 10 | 1 | 4.858  | F | 0.500 | -0.291 |
| SNB3 | 2007 | 149 | 10 | 1 | 14.086 | F | 0.500 | 0.034  |
| ELFS | 2007 | 149 | 10 | 1 | 12.717 | F | 0.500 | -0.281 |
| SN96 | 2007 | 149 | 10 | 1 | 17.921 | F | 0.500 | 0.124  |
| R04C | 2007 | 149 | 10 | 1 | 14.013 | F | 0.500 | -0.260 |
| J03A | 2007 | 149 | 10 | 1 | 1.378  | F | 0.500 | -1.868 |
| SMM  | 2007 | 149 | 10 | 1 | 21.727 | F | 0.500 | 1.273  |
| MLAC | 2007 | 149 | 10 | 1 | 24.472 | F | 0.500 | 2.008  |
| RRX  | 2007 | 149 | 10 | 1 | 33.322 | F | 0.500 | 2.808  |
| SNG7 | 2007 | 149 | 10 | 1 | 10.808 | F | 0.500 | -1.613 |
| J05A | 2007 | 149 | 10 | 1 | 7.675  | F | 0.500 | -0.891 |
| HELL | 2007 | 149 | 10 | 1 | 22.379 | F | 0.500 | -0.124 |
| HAST | 2007 | 149 | 10 | 1 | 13.649 | F | 0.500 | -0.478 |
| SN97 | 2007 | 149 | 10 | 1 | 18.095 | F | 0.500 | 0.135  |
| SNB5 | 2007 | 149 | 10 | 1 | 15.277 | F | 0.500 | -0.064 |
| CIA  | 2007 | 149 | 10 | 1 | 28.564 | F | 0.500 | 0.968  |
| BFS  | 2007 | 149 | 10 | 1 | 30.463 | F | 0.500 | 1.162  |
| I03A | 2007 | 149 | 10 | 0 | 59.617 | F | 0.500 | -2.106 |
| J04A | 2007 | 149 | 10 | 1 | 4.231  | F | 0.500 | -1.942 |
| HATC | 2007 | 149 | 10 | 1 | 9.208  | F | 0.500 | -1.208 |
| T06C | 2007 | 149 | 10 | 1 | 19.517 | F | 0.500 | -0.274 |
| CMB  | 2007 | 149 | 10 | 1 | 16.638 | F | 0.500 | 0.205  |
| SNE9 | 2007 | 149 | 10 | 1 | 14.313 | F | 0.500 | -1.323 |
| M05C | 2007 | 149 | 10 | 1 | 10.361 | F | 0.500 | -0.739 |
| WDC  | 2007 | 149 | 10 | 1 | 5.873  | F | 0.500 | -0.919 |
| SNB7 | 2007 | 149 | 10 | 1 | 16.822 | F | 0.500 | 0.094  |
| O04C | 2007 | 149 | 10 | 1 | 11.074 | F | 0.500 | -1.130 |
| SUTB | 2007 | 149 | 10 | 1 | 9.868  | F | 0.500 | -0.845 |

|      |      |     |    |   |        |   |       |        |
|------|------|-----|----|---|--------|---|-------|--------|
| YBH  | 2007 | 149 | 10 | 1 | 4.842  | F | 0.500 | -0.476 |
| Q04C | 2007 | 149 | 10 | 1 | 12.196 | F | 0.500 | -0.034 |
| SNE6 | 2007 | 149 | 10 | 1 | 12.853 | F | 0.500 | -1.126 |
| GSC  | 2007 | 149 | 10 | 1 | 34.148 | F | 0.500 | 3.160  |
| O05C | 2007 | 149 | 10 | 1 | 11.682 | F | 0.500 | -1.072 |
| SNG5 | 2007 | 149 | 10 | 1 | 9.443  | F | 0.500 | -1.572 |
| MPM  | 2007 | 149 | 10 | 1 | 30.397 | F | 0.500 | 2.162  |
| SND8 | 2007 | 149 | 10 | 1 | 15.233 | F | 0.500 | -0.425 |
| EDW2 | 2007 | 149 | 10 | 1 | 29.548 | F | 0.500 | 2.195  |
| R05C | 2007 | 149 | 10 | 1 | 17.733 | F | 0.500 | 0.444  |
| DGR  | 2007 | 149 | 10 | 1 | 33.942 | F | 0.500 | 2.190  |
| ORV  | 2007 | 149 | 10 | 1 | 10.392 | F | 0.500 | -1.182 |
| SND5 | 2007 | 149 | 10 | 1 | 12.759 | F | 0.500 | -0.871 |
| I06A | 2007 | 149 | 10 | 1 | 10.892 | F | 0.500 | -0.115 |
| LAVA | 2007 | 149 | 10 | 1 | 14.671 | F | 0.500 | -0.042 |
| SNA3 | 2007 | 149 | 10 | 1 | 14.988 | F | 0.500 | -0.019 |
| SNA4 | 2007 | 149 | 10 | 1 | 15.591 | F | 0.500 | -0.026 |
| SLA  | 2007 | 149 | 10 | 1 | 31.175 | F | 0.500 | 2.142  |
| SNE4 | 2007 | 149 | 10 | 1 | 11.608 | F | 0.500 | -0.328 |
| SNC5 | 2007 | 149 | 10 | 1 | 14.155 | F | 0.500 | -0.235 |

|      |      |     |    |         |          |           |         |        |        |
|------|------|-----|----|---------|----------|-----------|---------|--------|--------|
| 2007 | 212  | 22  | 55 | 47.9943 | -0.16200 | -17.79500 | 11.0000 | 68     | 16.874 |
| YO06 | 2007 | 212 | 23 | 20      | 11.181   | F         | 0.500   | 1.151  |        |
| DBO  | 2007 | 212 | 23 | 20      | 16.950   | F         | 0.500   | -1.649 |        |
| P01C | 2007 | 212 | 23 | 20      | 24.531   | F         | 0.500   | 2.364  |        |
| FUR  | 2007 | 212 | 23 | 19      | 59.111   | F         | 0.500   | 0.112  |        |
| MLAC | 2007 | 212 | 23 | 20      | 8.460    | F         | 0.500   | 1.534  |        |
| OSI  | 2007 | 212 | 23 | 20      | 6.091    | F         | 0.500   | -1.677 |        |
| J03A | 2007 | 212 | 23 | 20      | 15.864   | F         | 0.500   | -1.632 |        |
| DGR  | 2007 | 212 | 23 | 19      | 59.768   | F         | 0.500   | -1.529 |        |
| CVS  | 2007 | 212 | 23 | 20      | 20.098   | F         | 0.500   | 0.441  |        |
| L05A | 2007 | 212 | 23 | 20      | 10.096   | F         | 0.500   | -1.078 |        |
| U05C | 2007 | 212 | 23 | 20      | 12.252   | F         | 0.500   | 0.044  |        |
| SN97 | 2007 | 212 | 23 | 20      | 11.013   | F         | 0.500   | 1.217  |        |
| J02A | 2007 | 212 | 23 | 20      | 18.766   | F         | 0.500   | -0.543 |        |
| MPP  | 2007 | 212 | 23 | 20      | 12.055   | F         | 0.500   | -0.288 |        |
| N07B | 2007 | 212 | 23 | 20      | 4.715    | F         | 0.500   | -0.484 |        |
| K09A | 2007 | 212 | 23 | 19      | 57.477   | F         | 0.500   | -1.619 |        |
| K10A | 2007 | 212 | 23 | 19      | 54.701   | F         | 0.500   | -1.270 |        |
| P10A | 2007 | 212 | 23 | 19      | 54.213   | F         | 0.500   | -1.854 |        |
| J08A | 2007 | 212 | 23 | 19      | 59.206   | F         | 0.500   | -2.357 |        |
| SN87 | 2007 | 212 | 23 | 20      | 10.646   | F         | 0.500   | 1.166  |        |
| M05C | 2007 | 212 | 23 | 20      | 11.946   | F         | 0.500   | -0.845 |        |
| M08A | 2007 | 212 | 23 | 20      | 1.054    | F         | 0.500   | -1.321 |        |
| PKD  | 2007 | 212 | 23 | 20      | 15.050   | F         | 0.500   | 0.515  |        |
| R07C | 2007 | 212 | 23 | 20      | 9.668    | F         | 0.500   | 2.296  |        |
| O04C | 2007 | 212 | 23 | 20      | 13.196   | F         | 0.500   | -0.320 |        |
| S10A | 2007 | 212 | 23 | 19      | 56.566   | F         | 0.500   | -0.966 |        |
| TIN  | 2007 | 212 | 23 | 20      | 4.373    | F         | 0.500   | -0.110 |        |
| SNA4 | 2007 | 212 | 23 | 20      | 13.505   | F         | 0.500   | 0.734  |        |
| J10A | 2007 | 212 | 23 | 19      | 52.251   | F         | 0.500   | -2.551 |        |
| YBH  | 2007 | 212 | 23 | 20      | 16.823   | F         | 0.500   | -1.222 |        |
| SNB7 | 2007 | 212 | 23 | 20      | 11.538   | F         | 0.500   | 0.540  |        |
| O06A | 2007 | 212 | 23 | 20      | 8.555    | F         | 0.500   | -0.170 |        |
| M02C | 2007 | 212 | 23 | 20      | 18.164   | F         | 0.500   | -0.719 |        |
| WDC  | 2007 | 212 | 23 | 20      | 16.459   | F         | 0.500   | -1.782 |        |
| N02C | 2007 | 212 | 23 | 20      | 21.446   | F         | 0.500   | 0.417  |        |
| ORV  | 2007 | 212 | 23 | 20      | 15.492   | F         | 0.500   | 0.258  |        |
| SND4 | 2007 | 212 | 23 | 20      | 15.234   | F         | 0.500   | 0.919  |        |
| L04A | 2007 | 212 | 23 | 20      | 13.899   | F         | 0.500   | -0.959 |        |
| WVOR | 2007 | 212 | 23 | 20      | 1.702    | F         | 0.500   | -1.094 |        |
| SNF6 | 2007 | 212 | 23 | 20      | 13.929   | F         | 0.500   | -0.064 |        |
| SNB5 | 2007 | 212 | 23 | 20      | 13.418   | F         | 0.500   | 0.763  |        |

|      |      |     |    |    |        |   |       |        |
|------|------|-----|----|----|--------|---|-------|--------|
| V04C | 2007 | 212 | 23 | 20 | 17.134 | F | 0.500 | 1.185  |
| HUMO | 2007 | 212 | 23 | 20 | 16.299 | F | 0.500 | -1.608 |
| K06A | 2007 | 212 | 23 | 20 | 6.980  | F | 0.500 | -1.569 |
| J05A | 2007 | 212 | 23 | 20 | 11.239 | F | 0.500 | -0.439 |
| SNF9 | 2007 | 212 | 23 | 20 | 10.635 | F | 0.500 | -0.443 |
| N06A | 2007 | 212 | 23 | 20 | 7.789  | F | 0.500 | -0.558 |
| ELFS | 2007 | 212 | 23 | 20 | 11.406 | F | 0.500 | -0.614 |
| R06C | 2007 | 212 | 23 | 20 | 10.376 | F | 0.500 | 1.673  |
| LAVA | 2007 | 212 | 23 | 20 | 14.159 | F | 0.500 | 0.875  |
| SNE4 | 2007 | 212 | 23 | 20 | 15.303 | F | 0.500 | 0.252  |
| SND8 | 2007 | 212 | 23 | 20 | 11.050 | F | 0.500 | 0.105  |
| YO05 | 2007 | 212 | 23 | 20 | 11.280 | F | 0.500 | 1.145  |
| YO03 | 2007 | 212 | 23 | 20 | 11.328 | F | 0.500 | 0.870  |
| S05C | 2007 | 212 | 23 | 20 | 13.128 | F | 0.500 | 0.857  |
| SN93 | 2007 | 212 | 23 | 20 | 14.155 | F | 0.500 | 1.226  |
| SNA3 | 2007 | 212 | 23 | 20 | 14.349 | F | 0.500 | 0.973  |
| SND9 | 2007 | 212 | 23 | 20 | 10.219 | F | 0.500 | 0.474  |
| R04C | 2007 | 212 | 23 | 20 | 15.299 | F | 0.500 | 1.288  |
| CMB  | 2007 | 212 | 23 | 20 | 13.498 | F | 0.500 | 1.076  |
| SNB3 | 2007 | 212 | 23 | 20 | 15.195 | F | 0.500 | 1.204  |
| YO02 | 2007 | 212 | 23 | 20 | 11.287 | F | 0.500 | 0.741  |
| SN63 | 2007 | 212 | 23 | 20 | 11.258 | F | 0.500 | 0.658  |
| YO04 | 2007 | 212 | 23 | 20 | 11.323 | F | 0.500 | 1.196  |
| R08A | 2007 | 212 | 23 | 20 | 3.864  | F | 0.500 | 0.369  |
| T06C | 2007 | 212 | 23 | 20 | 9.621  | F | 0.500 | -0.458 |
| SNC6 | 2007 | 212 | 23 | 20 | 12.844 | F | 0.500 | 0.661  |
| WCN  | 2007 | 212 | 23 | 20 | 10.558 | F | 0.500 | 1.170  |
| SNB9 | 2007 | 212 | 23 | 20 | 9.986  | F | 0.500 | 1.244  |
| R05C | 2007 | 212 | 23 | 20 | 12.066 | F | 0.500 | 0.853  |
| ISA  | 2007 | 212 | 23 | 20 | 5.562  | F | 0.500 | -0.776 |

|      |     |    |    |         |          |           |         |   |        |
|------|-----|----|----|---------|----------|-----------|---------|---|--------|
| 1997 | 187 | 20 | 13 | 52.0414 | 16.15700 | -87.91700 | 33.0000 | 8 | 15.011 |
|------|-----|----|----|---------|----------|-----------|---------|---|--------|

|      |      |     |    |    |        |   |       |        |
|------|------|-----|----|----|--------|---|-------|--------|
| OVY  | 1997 | 187 | 20 | 25 | 54.437 | S | 0.500 | -0.642 |
| TWR2 | 1997 | 187 | 20 | 25 | 52.098 | S | 0.500 | -0.370 |
| SMD  | 1997 | 187 | 20 | 25 | 58.597 | S | 0.500 | -0.832 |
| JUN  | 1997 | 187 | 20 | 25 | 53.956 | S | 0.500 | -0.391 |
| CPR  | 1997 | 187 | 20 | 25 | 57.303 | S | 0.500 | -0.223 |
| BRR  | 1997 | 187 | 20 | 26 | 3.823  | S | 0.500 | 0.527  |
| WVOR | 1997 | 187 | 20 | 26 | 41.392 | S | 0.500 | -2.695 |
| CMB  | 1997 | 187 | 20 | 26 | 26.163 | S | 0.500 | 0.298  |
| TPNV | 1997 | 187 | 20 | 25 | 33.802 | S | 0.500 | 0.035  |
| BGR  | 1997 | 187 | 20 | 25 | 59.736 | S | 0.500 | -1.129 |
| FLL  | 1997 | 187 | 20 | 26 | 6.435  | S | 0.500 | 0.852  |
| DGR  | 1997 | 187 | 20 | 25 | 16.615 | S | 0.500 | -0.531 |
| PFO  | 1997 | 187 | 20 | 25 | 10.311 | S | 0.500 | -0.322 |
| GSC  | 1997 | 187 | 20 | 25 | 28.072 | S | 0.500 | 1.271  |
| BPC  | 1997 | 187 | 20 | 25 | 60.000 | S | 0.500 | 1.379  |
| SFT  | 1997 | 187 | 20 | 25 | 48.542 | S | 0.500 | 0.789  |
| TPH  | 1997 | 187 | 20 | 25 | 53.058 | S | 0.500 | -0.167 |
| CWC  | 1997 | 187 | 20 | 25 | 50.256 | S | 0.500 | 0.764  |
| CHP  | 1997 | 187 | 20 | 25 | 46.664 | S | 0.500 | 0.884  |
| SRF  | 1997 | 187 | 20 | 25 | 53.907 | S | 0.500 | 0.301  |
| SFK  | 1997 | 187 | 20 | 25 | 56.313 | S | 0.500 | -0.533 |
| DP00 | 1997 | 187 | 20 | 25 | 45.074 | S | 0.500 | 1.663  |
| WMD  | 1997 | 187 | 20 | 25 | 52.560 | S | 0.500 | -0.866 |
| WHP  | 1997 | 187 | 20 | 25 | 52.209 | S | 0.500 | -0.062 |

|      |     |    |    |         |          |           |         |   |        |
|------|-----|----|----|---------|----------|-----------|---------|---|--------|
| 1997 | 190 | 19 | 24 | 27.0764 | 10.59800 | -63.48600 | 19.9000 | 9 | 13.906 |
|------|-----|----|----|---------|----------|-----------|---------|---|--------|

|      |      |     |    |    |        |   |       |        |
|------|------|-----|----|----|--------|---|-------|--------|
| CPR  | 1997 | 190 | 19 | 41 | 51.286 | S | 0.500 | -0.039 |
| VTV  | 1997 | 190 | 19 | 41 | 31.312 | S | 0.500 | -0.021 |
| CMB  | 1997 | 190 | 19 | 42 | 13.646 | S | 0.500 | 0.311  |
| HVY  | 1997 | 190 | 19 | 41 | 56.486 | S | 0.500 | -1.836 |
| WVOR | 1997 | 190 | 19 | 42 | 7.932  | S | 0.500 | -3.041 |



|      |      |     |    |    |        |   |       |        |
|------|------|-----|----|----|--------|---|-------|--------|
| FLL  | 1997 | 190 | 19 | 41 | 57.354 | S | 0.500 | 0.283  |
| BRR  | 1997 | 190 | 19 | 41 | 55.989 | S | 0.500 | -0.420 |
| DGR  | 1997 | 190 | 19 | 41 | 25.976 | S | 0.500 | 0.761  |
| BPC  | 1997 | 190 | 19 | 41 | 51.956 | S | 0.500 | 0.912  |
| GSC  | 1997 | 190 | 19 | 41 | 28.875 | S | 0.500 | 0.908  |
| PFO  | 1997 | 190 | 19 | 41 | 19.643 | S | 0.500 | 0.468  |
| SFT  | 1997 | 190 | 19 | 41 | 44.947 | S | 0.500 | 0.616  |
| BVC  | 1997 | 190 | 19 | 41 | 44.353 | S | 0.500 | 0.976  |
| WMD  | 1997 | 190 | 19 | 41 | 49.476 | S | 0.500 | -0.429 |
| PDC  | 1997 | 190 | 19 | 41 | 52.676 | S | 0.500 | -0.329 |
| SRF  | 1997 | 190 | 19 | 41 | 46.794 | S | 0.500 | -0.178 |
| ARC2 | 1997 | 190 | 19 | 41 | 47.019 | S | 0.500 | 0.244  |
| CWC  | 1997 | 190 | 19 | 41 | 46.225 | S | 0.500 | 1.106  |
| TWR2 | 1997 | 190 | 19 | 41 | 48.671 | S | 0.500 | 0.349  |
| JUN  | 1997 | 190 | 19 | 41 | 49.464 | S | 0.500 | 0.275  |
| SLC  | 1997 | 190 | 19 | 41 | 41.696 | S | 0.500 | -0.037 |
| SFK  | 1997 | 190 | 19 | 41 | 51.531 | S | 0.500 | -0.874 |
| BGR  | 1997 | 190 | 19 | 41 | 53.960 | S | 0.500 | -1.246 |
| WHP  | 1997 | 190 | 19 | 41 | 47.362 | S | 0.500 | 0.156  |
| OVY  | 1997 | 190 | 19 | 41 | 48.654 | S | 0.500 | -0.454 |
| SMD  | 1997 | 190 | 19 | 41 | 52.182 | S | 0.500 | -0.250 |
| DP00 | 1997 | 190 | 19 | 41 | 41.581 | S | 0.500 | 1.633  |
| TPNV | 1997 | 190 | 19 | 41 | 27.580 | S | 0.500 | 0.055  |
| SNCC | 1997 | 190 | 19 | 41 | 51.701 | S | 0.500 | 0.098  |

|      |     |   |    |         |          |            |         |    |        |
|------|-----|---|----|---------|----------|------------|---------|----|--------|
| 1997 | 201 | 0 | 30 | 34.1610 | 52.56200 | -167.48399 | 14.4000 | 12 | 13.171 |
|------|-----|---|----|---------|----------|------------|---------|----|--------|

|      |      |     |   |    |        |   |       |        |
|------|------|-----|---|----|--------|---|-------|--------|
| BPC  | 1997 | 201 | 0 | 43 | 34.109 | S | 0.500 | 1.326  |
| DGR  | 1997 | 201 | 0 | 44 | 19.924 | S | 0.500 | -0.406 |
| PDC  | 1997 | 201 | 0 | 43 | 36.108 | S | 0.500 | -2.003 |
| ARC2 | 1997 | 201 | 0 | 43 | 47.297 | S | 0.500 | 2.500  |
| DAC  | 1997 | 201 | 0 | 43 | 49.140 | S | 0.500 | 0.262  |
| SLC  | 1997 | 201 | 0 | 43 | 46.142 | S | 0.500 | 0.888  |
| DP00 | 1997 | 201 | 0 | 43 | 49.206 | S | 0.500 | 0.786  |
| BRR  | 1997 | 201 | 0 | 43 | 28.638 | S | 0.500 | -0.445 |
| TPNV | 1997 | 201 | 0 | 43 | 54.101 | S | 0.500 | -0.443 |
| SRF  | 1997 | 201 | 0 | 43 | 38.496 | S | 0.500 | 0.868  |
| CCC  | 1997 | 201 | 0 | 43 | 33.848 | S | 0.500 | -0.843 |
| SFT  | 1997 | 201 | 0 | 43 | 43.613 | S | 0.500 | -1.398 |
| BVC  | 1997 | 201 | 0 | 43 | 43.554 | S | 0.500 | 1.950  |
| FLL  | 1997 | 201 | 0 | 43 | 26.419 | S | 0.500 | 0.161  |
| WHP  | 1997 | 201 | 0 | 43 | 39.932 | S | 0.500 | -0.182 |
| TPH  | 1997 | 201 | 0 | 43 | 33.847 | S | 0.500 | -0.850 |
| OVY  | 1997 | 201 | 0 | 43 | 37.024 | S | 0.500 | -0.194 |
| CPR  | 1997 | 201 | 0 | 43 | 33.757 | S | 0.500 | -0.803 |
| JUN  | 1997 | 201 | 0 | 43 | 37.318 | S | 0.500 | -1.118 |
| SMD  | 1997 | 201 | 0 | 43 | 32.278 | S | 0.500 | -0.054 |

|      |     |    |    |         |           |            |         |    |        |
|------|-----|----|----|---------|-----------|------------|---------|----|--------|
| 1997 | 220 | 22 | 27 | 30.7584 | -15.47700 | -179.14000 | 10.0000 | 15 | 10.908 |
|------|-----|----|----|---------|-----------|------------|---------|----|--------|

|      |      |     |    |    |        |   |       |        |
|------|------|-----|----|----|--------|---|-------|--------|
| WVOR | 1997 | 220 | 22 | 49 | 45.766 | S | 0.500 | 0.376  |
| TWR2 | 1997 | 220 | 22 | 49 | 13.571 | S | 0.500 | -0.670 |
| MWC  | 1997 | 220 | 22 | 49 | 5.906  | S | 0.500 | 0.556  |
| GSC  | 1997 | 220 | 22 | 49 | 20.866 | S | 0.500 | 0.353  |
| VTV  | 1997 | 220 | 22 | 49 | 12.532 | S | 0.500 | 0.065  |
| PLM  | 1997 | 220 | 22 | 49 | 11.025 | S | 0.500 | 0.935  |
| PAS  | 1997 | 220 | 22 | 49 | 4.557  | S | 0.500 | 1.048  |
| TIN  | 1997 | 220 | 22 | 49 | 20.201 | S | 0.500 | 1.064  |
| BMN  | 1997 | 220 | 22 | 49 | 43.045 | S | 0.500 | -1.406 |
| OVY  | 1997 | 220 | 22 | 49 | 17.405 | S | 0.500 | 0.146  |
| PDC  | 1997 | 220 | 22 | 49 | 7.133  | S | 0.500 | -0.324 |
| WMD  | 1997 | 220 | 22 | 49 | 11.603 | S | 0.500 | -0.727 |
| CMB  | 1997 | 220 | 22 | 49 | 9.319  | S | 0.500 | 0.895  |
| CCC  | 1997 | 220 | 22 | 49 | 12.113 | S | 0.500 | -0.200 |
| SFT  | 1997 | 220 | 22 | 49 | 16.104 | S | 0.500 | -0.071 |

|      |      |     |    |    |        |   |       |        |
|------|------|-----|----|----|--------|---|-------|--------|
| SVD  | 1997 | 220 | 22 | 49 | 12.982 | S | 0.500 | 0.930  |
| TPNV | 1997 | 220 | 22 | 49 | 33.010 | S | 0.500 | -0.410 |
| HVY  | 1997 | 220 | 22 | 49 | 7.951  | S | 0.500 | -0.894 |
| BRR  | 1997 | 220 | 22 | 49 | 12.193 | S | 0.500 | -0.184 |
| FLL  | 1997 | 220 | 22 | 49 | 15.946 | S | 0.500 | 1.003  |
| BPC  | 1997 | 220 | 22 | 49 | 19.618 | S | 0.500 | 1.357  |
| SMD  | 1997 | 220 | 22 | 49 | 15.716 | S | 0.500 | 0.049  |
| CWC  | 1997 | 220 | 22 | 49 | 17.915 | S | 0.500 | 0.747  |
| DP00 | 1997 | 220 | 22 | 49 | 20.138 | S | 0.500 | 0.807  |
| WHP  | 1997 | 220 | 22 | 49 | 16.864 | S | 0.500 | -0.159 |
| DAC  | 1997 | 220 | 22 | 49 | 19.449 | S | 0.500 | -0.467 |
| SRF  | 1997 | 220 | 22 | 49 | 19.778 | S | 0.500 | 0.257  |
| JUN  | 1997 | 220 | 22 | 49 | 15.152 | S | 0.500 | -0.417 |
| ARC2 | 1997 | 220 | 22 | 49 | 12.560 | S | 0.500 | -0.385 |
| CPR  | 1997 | 220 | 22 | 49 | 15.008 | S | 0.500 | -0.267 |
| SLC  | 1997 | 220 | 22 | 49 | 20.000 | S | 0.500 | -0.398 |
| LMC  | 1997 | 220 | 22 | 49 | 7.163  | S | 0.500 | -1.920 |
| BGR  | 1997 | 220 | 22 | 49 | 9.070  | S | 0.500 | -1.690 |

|      |     |   |    |        |          |            |         |    |        |
|------|-----|---|----|--------|----------|------------|---------|----|--------|
| 1997 | 227 | 7 | 38 | 0.2791 | -4.37300 | -105.69800 | 10.0000 | 16 | 11.199 |
|------|-----|---|----|--------|----------|------------|---------|----|--------|

|      |      |     |   |    |        |   |       |        |
|------|------|-----|---|----|--------|---|-------|--------|
| JUN  | 1997 | 227 | 7 | 52 | 18.657 | S | 0.500 | 0.690  |
| TIN  | 1997 | 227 | 7 | 52 | 24.310 | S | 0.500 | 0.820  |
| BRR  | 1997 | 227 | 7 | 52 | 23.847 | S | 0.500 | -0.878 |
| BMN  | 1997 | 227 | 7 | 53 | 6.055  | S | 0.500 | -0.744 |
| GSC  | 1997 | 227 | 7 | 51 | 53.891 | S | 0.500 | 0.080  |
| MNV  | 1997 | 227 | 7 | 52 | 43.361 | S | 0.500 | 0.888  |
| PHL  | 1997 | 227 | 7 | 52 | 9.550  | S | 0.500 | -1.004 |
| SBC  | 1997 | 227 | 7 | 51 | 52.851 | S | 0.500 | -0.307 |
| BPC  | 1997 | 227 | 7 | 52 | 26.637 | S | 0.500 | 0.878  |
| CMB  | 1997 | 227 | 7 | 52 | 44.529 | S | 0.500 | -1.072 |
| TWR2 | 1997 | 227 | 7 | 52 | 15.193 | S | 0.500 | 0.569  |
| DAC  | 1997 | 227 | 7 | 52 | 11.004 | S | 0.500 | 0.548  |
| SFT  | 1997 | 227 | 7 | 52 | 12.341 | S | 0.500 | 0.744  |
| BGR  | 1997 | 227 | 7 | 52 | 19.178 | S | 0.500 | -1.365 |
| WMD  | 1997 | 227 | 7 | 52 | 13.362 | S | 0.500 | 0.076  |
| SRF  | 1997 | 227 | 7 | 52 | 21.955 | S | 0.500 | 0.108  |
| WHP  | 1997 | 227 | 7 | 52 | 17.692 | S | 0.500 | 0.390  |
| SLC  | 1997 | 227 | 7 | 52 | 15.028 | S | 0.500 | 0.698  |
| FLL  | 1997 | 227 | 7 | 52 | 29.101 | S | 0.500 | -0.635 |
| DP00 | 1997 | 227 | 7 | 52 | 12.036 | S | 0.500 | 1.362  |
| SMD  | 1997 | 227 | 7 | 52 | 23.512 | S | 0.500 | -0.640 |
| ARC2 | 1997 | 227 | 7 | 52 | 9.854  | S | 0.500 | 0.055  |
| MWC  | 1997 | 227 | 7 | 51 | 43.701 | S | 0.500 | 0.270  |
| LMC  | 1997 | 227 | 7 | 52 | 15.289 | S | 0.500 | -1.470 |
| OVY  | 1997 | 227 | 7 | 52 | 20.479 | S | 0.500 | -0.009 |
| TPNV | 1997 | 227 | 7 | 52 | 16.099 | S | 0.500 | 0.996  |
| CWC  | 1997 | 227 | 7 | 52 | 16.236 | S | 0.500 | 1.750  |
| PDC  | 1997 | 227 | 7 | 52 | 11.535 | S | 0.500 | -0.515 |
| CPR  | 1997 | 227 | 7 | 52 | 21.287 | S | 0.500 | -0.057 |
| HVY  | 1997 | 227 | 7 | 52 | 20.587 | S | 0.500 | -2.226 |

|      |     |   |    |         |           |            |         |    |        |
|------|-----|---|----|---------|-----------|------------|---------|----|--------|
| 1997 | 241 | 6 | 54 | 14.9466 | -15.23500 | -175.57600 | 33.0000 | 17 | 14.707 |
|------|-----|---|----|---------|-----------|------------|---------|----|--------|

|      |      |     |   |    |        |   |       |        |
|------|------|-----|---|----|--------|---|-------|--------|
| JUN  | 1997 | 241 | 7 | 15 | 24.297 | S | 0.500 | -0.706 |
| ARC2 | 1997 | 241 | 7 | 15 | 26.699 | S | 0.500 | 4.633  |
| SNCC | 1997 | 241 | 7 | 14 | 57.555 | S | 0.500 | 2.120  |
| RPV  | 1997 | 241 | 7 | 15 | 7.769  | S | 0.500 | 0.196  |
| MWC  | 1997 | 241 | 7 | 15 | 13.447 | S | 0.500 | -0.083 |
| PHL  | 1997 | 241 | 7 | 15 | 1.554  | S | 0.500 | 0.733  |
| TWR2 | 1997 | 241 | 7 | 15 | 22.442 | S | 0.500 | -1.109 |
| PAS  | 1997 | 241 | 7 | 15 | 12.054 | S | 0.500 | 0.408  |
| WVOR | 1997 | 241 | 7 | 15 | 57.251 | S | 0.500 | -0.759 |
| CIU  | 1997 | 241 | 7 | 15 | 5.442  | S | 0.500 | 0.566  |
| WHP  | 1997 | 241 | 7 | 15 | 26.168 | S | 0.500 | -0.300 |

|      |      |     |   |    |        |   |       |        |
|------|------|-----|---|----|--------|---|-------|--------|
| SFT  | 1997 | 241 | 7 | 15 | 25.069 | S | 0.500 | -0.359 |
| WMD  | 1997 | 241 | 7 | 15 | 19.988 | S | 0.500 | -1.552 |
| GSC  | 1997 | 241 | 7 | 15 | 29.533 | S | 0.500 | 0.214  |
| TIN  | 1997 | 241 | 7 | 15 | 29.155 | S | 0.500 | 0.314  |
| TPNV | 1997 | 241 | 7 | 15 | 42.121 | S | 0.500 | -1.000 |
| MLAC | 1997 | 241 | 7 | 15 | 29.633 | S | 0.500 | 1.697  |
| PLM  | 1997 | 241 | 7 | 15 | 18.768 | S | 0.500 | 0.896  |
| BGR  | 1997 | 241 | 7 | 15 | 18.430 | S | 0.500 | -1.781 |
| SRF  | 1997 | 241 | 7 | 15 | 29.071 | S | 0.500 | -0.096 |
| CWC  | 1997 | 241 | 7 | 15 | 26.792 | S | 0.500 | 0.259  |
| CMB  | 1997 | 241 | 7 | 15 | 18.847 | S | 0.500 | 0.204  |
| SVD  | 1997 | 241 | 7 | 15 | 20.806 | S | 0.500 | 0.586  |
| FLL  | 1997 | 241 | 7 | 15 | 24.961 | S | 0.500 | 0.228  |
| SLC  | 1997 | 241 | 7 | 15 | 29.233 | S | 0.500 | -0.581 |
| LMC  | 1997 | 241 | 7 | 15 | 16.126 | S | 0.500 | -2.255 |
| CPR  | 1997 | 241 | 7 | 15 | 23.916 | S | 0.500 | -0.905 |
| BPC  | 1997 | 241 | 7 | 15 | 28.759 | S | 0.500 | 0.761  |
| BRR  | 1997 | 241 | 7 | 15 | 21.257 | S | 0.500 | -0.720 |
| SMD  | 1997 | 241 | 7 | 15 | 24.668 | S | 0.500 | -0.643 |
| DP00 | 1997 | 241 | 7 | 15 | 29.035 | S | 0.500 | 0.403  |
| HVY  | 1997 | 241 | 7 | 15 | 16.957 | S | 0.500 | -1.370 |

|      |      |    |    |         |         |           |         |        |        |
|------|------|----|----|---------|---------|-----------|---------|--------|--------|
| 2006 | 23   | 20 | 50 | 57.7210 | 6.86400 | -77.79300 | 14.0000 | 13     | 12.741 |
| ORV  | 2006 | 23 | 21 | 7       | 14.616  | S         | 0.500   | -0.796 |        |
| LAVA | 2006 | 23 | 21 | 7       | 3.651   | S         | 0.500   | 0.426  |        |
| KCC  | 2006 | 23 | 21 | 6       | 39.453  | S         | 0.500   | -0.596 |        |
| O05C | 2006 | 23 | 21 | 7       | 11.343  | S         | 0.500   | -1.547 |        |
| CMB  | 2006 | 23 | 21 | 6       | 55.403  | S         | 0.500   | 0.286  |        |
| BFS  | 2006 | 23 | 21 | 6       | 3.540   | S         | 0.500   | 0.942  |        |
| SN23 | 2006 | 23 | 21 | 6       | 36.874  | S         | 0.500   | -0.954 |        |
| ARV  | 2006 | 23 | 21 | 6       | 20.390  | S         | 0.500   | -0.005 |        |
| P05C | 2006 | 23 | 21 | 7       | 5.376   | S         | 0.500   | -0.422 |        |
| SHO  | 2006 | 23 | 21 | 6       | 0.462   | S         | 0.500   | 1.102  |        |
| SMM  | 2006 | 23 | 21 | 6       | 34.637  | S         | 0.500   | 0.761  |        |
| S04C | 2006 | 23 | 21 | 7       | 1.154   | S         | 0.500   | 0.335  |        |
| R07C | 2006 | 23 | 21 | 6       | 44.299  | S         | 0.500   | 1.708  |        |
| RPV  | 2006 | 23 | 21 | 6       | 8.304   | S         | 0.500   | 1.234  |        |
| PACP | 2006 | 23 | 21 | 6       | 56.799  | S         | 0.500   | -0.791 |        |
| FARB | 2006 | 23 | 21 | 7       | 18.290  | S         | 0.500   | -0.410 |        |
| SN48 | 2006 | 23 | 21 | 6       | 39.336  | S         | 0.500   | 0.954  |        |
| BNLO | 2006 | 23 | 21 | 7       | 6.670   | S         | 0.500   | -0.575 |        |
| SUTB | 2006 | 23 | 21 | 7       | 15.323  | S         | 0.500   | -0.894 |        |
| SN71 | 2006 | 23 | 21 | 6       | 51.158  | S         | 0.500   | -1.367 |        |
| U04C | 2006 | 23 | 21 | 6       | 47.005  | S         | 0.500   | -1.452 |        |
| VCS  | 2006 | 23 | 21 | 6       | 8.696   | S         | 0.500   | -0.210 |        |
| TOV  | 2006 | 23 | 21 | 6       | 15.012  | S         | 0.500   | 0.913  |        |
| MNV  | 2006 | 23 | 21 | 6       | 36.059  | S         | 0.500   | -0.217 |        |
| FMP  | 2006 | 23 | 21 | 6       | 7.226   | S         | 0.500   | 1.491  |        |
| SN73 | 2006 | 23 | 21 | 6       | 50.627  | S         | 0.500   | -0.514 |        |
| Q04C | 2006 | 23 | 21 | 7       | 10.110  | S         | 0.500   | 0.362  |        |
| PLM  | 2006 | 23 | 21 | 5       | 49.776  | S         | 0.500   | 1.454  |        |
| DGR  | 2006 | 23 | 21 | 5       | 53.322  | S         | 0.500   | 1.639  |        |
| S06C | 2006 | 23 | 21 | 6       | 48.945  | S         | 0.500   | -0.092 |        |
| GRA  | 2006 | 23 | 21 | 6       | 18.992  | S         | 0.500   | 0.656  |        |
| SN62 | 2006 | 23 | 21 | 6       | 47.627  | S         | 0.500   | -0.801 |        |
| SN25 | 2006 | 23 | 21 | 6       | 35.336  | S         | 0.500   | 0.913  |        |
| SVD  | 2006 | 23 | 21 | 5       | 57.083  | S         | 0.500   | 1.553  |        |
| S05C | 2006 | 23 | 21 | 6       | 48.004  | S         | 0.500   | -1.910 |        |
| SDD  | 2006 | 23 | 21 | 5       | 59.368  | S         | 0.500   | 1.469  |        |
| MLAC | 2006 | 23 | 21 | 6       | 38.990  | S         | 0.500   | 1.491  |        |
| HEC  | 2006 | 23 | 21 | 5       | 53.376  | S         | 0.500   | 0.877  |        |
| HAST | 2006 | 23 | 21 | 6       | 55.821  | S         | 0.500   | -0.583 |        |
| SN47 | 2006 | 23 | 21 | 6       | 39.966  | S         | 0.500   | 1.208  |        |

|      |      |    |    |   |        |   |       |        |
|------|------|----|----|---|--------|---|-------|--------|
| TIN  | 2006 | 23 | 21 | 6 | 28.146 | S | 0.500 | 0.868  |
| PAS  | 2006 | 23 | 21 | 6 | 8.524  | S | 0.500 | 1.364  |
| JCS  | 2006 | 23 | 21 | 5 | 45.164 | S | 0.500 | 1.640  |
| R06C | 2006 | 23 | 21 | 6 | 50.924 | S | 0.500 | 1.426  |
| SDP  | 2006 | 23 | 21 | 6 | 34.443 | S | 0.500 | -0.122 |
| BBR  | 2006 | 23 | 21 | 5 | 56.415 | S | 0.500 | 1.390  |
| SN36 | 2006 | 23 | 21 | 6 | 36.904 | S | 0.500 | 0.702  |
| DJJ  | 2006 | 23 | 21 | 6 | 11.013 | S | 0.500 | 1.037  |
| SLA  | 2006 | 23 | 21 | 6 | 11.004 | S | 0.500 | 1.235  |
| R04C | 2006 | 23 | 21 | 7 | 1.503  | S | 0.500 | -0.281 |
| RRX  | 2006 | 23 | 21 | 6 | 0.462  | S | 0.500 | 0.742  |
| HELL | 2006 | 23 | 21 | 6 | 32.496 | S | 0.500 | -0.237 |
| CHF  | 2006 | 23 | 21 | 6 | 7.243  | S | 0.500 | 0.115  |
| MUR  | 2006 | 23 | 21 | 5 | 54.832 | S | 0.500 | 1.493  |
| SN67 | 2006 | 23 | 21 | 6 | 46.360 | S | 0.500 | 1.241  |
| SN38 | 2006 | 23 | 21 | 6 | 36.171 | S | 0.500 | 0.519  |
| SN26 | 2006 | 23 | 21 | 6 | 34.374 | S | 0.500 | 0.695  |
| LRL  | 2006 | 23 | 21 | 6 | 12.032 | S | 0.500 | 0.918  |
| SN37 | 2006 | 23 | 21 | 6 | 36.996 | S | 0.500 | 1.152  |
| FUR  | 2006 | 23 | 21 | 6 | 10.208 | S | 0.500 | 0.862  |
| SN28 | 2006 | 23 | 21 | 6 | 33.233 | S | 0.500 | 0.517  |
| SN46 | 2006 | 23 | 21 | 6 | 41.035 | S | 0.500 | 1.664  |
| SN15 | 2006 | 23 | 21 | 6 | 33.442 | S | 0.500 | 0.608  |
| SN66 | 2006 | 23 | 21 | 6 | 47.423 | S | 0.500 | 1.136  |
| MPM  | 2006 | 23 | 21 | 6 | 14.554 | S | 0.500 | 1.377  |
| S08C | 2006 | 23 | 21 | 6 | 31.020 | S | 0.500 | 0.669  |
| SN16 | 2006 | 23 | 21 | 6 | 30.654 | S | 0.500 | 0.832  |
| SN76 | 2006 | 23 | 21 | 6 | 50.479 | S | 0.500 | 1.297  |
| SN27 | 2006 | 23 | 21 | 6 | 34.510 | S | 0.500 | 1.543  |
| SN14 | 2006 | 23 | 21 | 6 | 34.222 | S | 0.500 | 0.377  |
| ISA  | 2006 | 23 | 21 | 6 | 22.040 | S | 0.500 | 1.592  |
| GSC  | 2006 | 23 | 21 | 6 | 1.904  | S | 0.500 | 1.100  |
| SCZ2 | 2006 | 23 | 21 | 6 | 22.937 | S | 0.500 | 1.000  |
| N02C | 2006 | 23 | 21 | 7 | 36.419 | S | 0.500 | -4.241 |
| O02C | 2006 | 23 | 21 | 7 | 28.719 | S | 0.500 | -3.070 |
| M02C | 2006 | 23 | 21 | 7 | 35.093 | S | 0.500 | -5.064 |
| T06C | 2006 | 23 | 21 | 6 | 38.744 | S | 0.500 | -2.823 |
| J02A | 2006 | 23 | 21 | 7 | 55.293 | S | 0.500 | -3.477 |
| SN65 | 2006 | 23 | 21 | 6 | 45.946 | S | 0.500 | -0.930 |
| BDM  | 2006 | 23 | 21 | 7 | 10.054 | S | 0.500 | 1.068  |
| V05C | 2006 | 23 | 21 | 6 | 36.110 | S | 0.500 | -0.187 |
| EDW2 | 2006 | 23 | 21 | 6 | 10.074 | S | 0.500 | -0.212 |
| SN22 | 2006 | 23 | 21 | 6 | 36.471 | S | 0.500 | -1.859 |
| MOD  | 2006 | 23 | 21 | 7 | 19.025 | S | 0.500 | -1.614 |
| PIN  | 2006 | 23 | 21 | 7 | 36.608 | S | 0.500 | -2.538 |
| O01C | 2006 | 23 | 21 | 7 | 39.625 | S | 0.500 | -1.531 |
| PKD  | 2006 | 23 | 21 | 6 | 42.497 | S | 0.500 | -0.806 |
| SN44 | 2006 | 23 | 21 | 6 | 41.602 | S | 0.500 | 0.572  |
| M05C | 2006 | 23 | 21 | 7 | 22.467 | S | 0.500 | -1.968 |
| WVOR | 2006 | 23 | 21 | 7 | 7.058  | S | 0.500 | -2.861 |
| MPP  | 2006 | 23 | 21 | 6 | 29.584 | S | 0.500 | -0.014 |
| L02A | 2006 | 23 | 21 | 7 | 47.968 | S | 0.500 | -3.591 |
| MNRC | 2006 | 23 | 21 | 7 | 21.597 | S | 0.500 | 1.289  |
| VTV  | 2006 | 23 | 21 | 6 | 1.335  | S | 0.500 | 0.166  |
| SN51 | 2006 | 23 | 21 | 6 | 44.807 | S | 0.500 | -1.862 |
| SN52 | 2006 | 23 | 21 | 6 | 43.834 | S | 0.500 | -1.022 |
| P01C | 2006 | 23 | 21 | 7 | 32.617 | S | 0.500 | -0.043 |
| HOPS | 2006 | 23 | 21 | 7 | 28.848 | S | 0.500 | 1.866  |
| Q03C | 2006 | 23 | 21 | 7 | 16.441 | S | 0.500 | 1.846  |
| GASB | 2006 | 23 | 21 | 7 | 27.674 | S | 0.500 | -0.271 |
| M03C | 2006 | 23 | 21 | 7 | 28.818 | S | 0.500 | -3.876 |
| TPH  | 2006 | 23 | 21 | 6 | 23.648 | S | 0.500 | -1.168 |
| RCT  | 2006 | 23 | 21 | 6 | 31.685 | S | 0.500 | -0.618 |

|      |      |    |    |   |        |   |       |        |
|------|------|----|----|---|--------|---|-------|--------|
| JRSC | 2006 | 23 | 21 | 7 | 9.320  | S | 0.500 | 0.057  |
| M06C | 2006 | 23 | 21 | 7 | 15.537 | S | 0.500 | -1.769 |
| ELFS | 2006 | 23 | 21 | 7 | 13.726 | S | 0.500 | -2.018 |
| V04C | 2006 | 23 | 21 | 6 | 45.169 | S | 0.500 | 0.257  |
| CVS  | 2006 | 23 | 21 | 7 | 17.561 | S | 0.500 | 0.310  |
| LGU  | 2006 | 23 | 21 | 6 | 16.770 | S | 0.500 | 0.301  |
| DEC  | 2006 | 23 | 21 | 6 | 10.227 | S | 0.500 | 0.597  |
| O04C | 2006 | 23 | 21 | 7 | 15.452 | S | 0.500 | -1.534 |
| R05C | 2006 | 23 | 21 | 6 | 57.937 | S | 0.500 | 0.964  |
| OSI  | 2006 | 23 | 21 | 6 | 16.265 | S | 0.500 | 0.123  |
| V03C | 2006 | 23 | 21 | 6 | 50.873 | S | 0.500 | -0.101 |
| USC  | 2006 | 23 | 21 | 6 | 8.961  | S | 0.500 | 1.438  |
| VES  | 2006 | 23 | 21 | 6 | 28.019 | S | 0.500 | 0.463  |
| PHL  | 2006 | 23 | 21 | 6 | 40.619 | S | 0.500 | 0.498  |
| CIA  | 2006 | 23 | 21 | 6 | 6.259  | S | 0.500 | 1.146  |

|      |      |    |    |         |         |           |         |        |        |
|------|------|----|----|---------|---------|-----------|---------|--------|--------|
| 2006 | 35   | 9  | 17 | 20.5228 | 1.09300 | -90.46000 | 10.0000 | 14     | 16.433 |
| CHF  | 2006 | 35 | 9  | 31      | 30.343  | S         | 0.500   | -0.145 |        |
| SN22 | 2006 | 35 | 9  | 32      | 6.978   | S         | 0.500   | -2.720 |        |
| SN54 | 2006 | 35 | 9  | 32      | 16.729  | S         | 0.500   | -2.000 |        |
| SN44 | 2006 | 35 | 9  | 32      | 12.166  | S         | 0.500   | -2.329 |        |
| SN11 | 2006 | 35 | 9  | 32      | 5.312   | S         | 0.500   | -0.451 |        |
| P05C | 2006 | 35 | 9  | 32      | 44.849  | S         | 0.500   | 1.446  |        |
| SN51 | 2006 | 35 | 9  | 32      | 14.329  | S         | 0.500   | -3.383 |        |
| O04C | 2006 | 35 | 9  | 32      | 56.109  | S         | 0.500   | -1.356 |        |
| V05C | 2006 | 35 | 9  | 32      | 2.954   | S         | 0.500   | 0.823  |        |
| SN73 | 2006 | 35 | 9  | 32      | 21.886  | S         | 0.500   | -2.360 |        |
| HOPS | 2006 | 35 | 9  | 33      | 1.266   | S         | 0.500   | 2.073  |        |
| SN55 | 2006 | 35 | 9  | 32      | 18.053  | S         | 0.500   | -0.995 |        |
| ELFS | 2006 | 35 | 9  | 32      | 57.175  | S         | 0.500   | -0.828 |        |
| SN65 | 2006 | 35 | 9  | 32      | 20.909  | S         | 0.500   | -0.842 |        |
| SUTB | 2006 | 35 | 9  | 32      | 52.016  | S         | 0.500   | 0.627  |        |
| SN66 | 2006 | 35 | 9  | 32      | 22.459  | S         | 0.500   | 0.216  |        |
| WENL | 2006 | 35 | 9  | 32      | 35.884  | S         | 0.500   | 0.868  |        |
| SN46 | 2006 | 35 | 9  | 32      | 15.105  | S         | 0.500   | 0.497  |        |
| ORV  | 2006 | 35 | 9  | 32      | 52.971  | S         | 0.500   | 0.561  |        |
| USC  | 2006 | 35 | 9  | 31      | 30.164  | S         | 0.500   | 0.971  |        |
| SMM  | 2006 | 35 | 9  | 31      | 57.198  | S         | 0.500   | -0.078 |        |
| HELL | 2006 | 35 | 9  | 32      | 3.546   | S         | 0.500   | 0.053  |        |
| CMB  | 2006 | 35 | 9  | 32      | 26.990  | S         | 0.500   | -1.533 |        |
| SDP  | 2006 | 35 | 9  | 31      | 53.487  | S         | 0.500   | -0.568 |        |
| SN47 | 2006 | 35 | 9  | 32      | 15.843  | S         | 0.500   | 0.648  |        |
| U04C | 2006 | 35 | 9  | 32      | 14.644  | S         | 0.500   | 0.128  |        |
| R07C | 2006 | 35 | 9  | 32      | 19.987  | S         | 0.500   | 1.201  |        |
| MLAC | 2006 | 35 | 9  | 32      | 12.908  | S         | 0.500   | 0.605  |        |
| S05C | 2006 | 35 | 9  | 32      | 18.115  | S         | 0.500   | -2.588 |        |
| ARV  | 2006 | 35 | 9  | 31      | 44.702  | S         | 0.500   | -0.612 |        |
| LAVA | 2006 | 35 | 9  | 32      | 38.588  | S         | 0.500   | -0.068 |        |
| HAST | 2006 | 35 | 9  | 32      | 21.077  | S         | 0.500   | -0.242 |        |
| V03C | 2006 | 35 | 9  | 32      | 15.100  | S         | 0.500   | 0.171  |        |
| SN67 | 2006 | 35 | 9  | 32      | 22.676  | S         | 0.500   | 0.815  |        |
| TPH  | 2006 | 35 | 9  | 32      | 4.090   | S         | 0.500   | -0.684 |        |
| SN28 | 2006 | 35 | 9  | 32      | 10.948  | S         | 0.500   | 0.979  |        |
| V04C | 2006 | 35 | 9  | 32      | 8.233   | S         | 0.500   | 0.224  |        |
| SN37 | 2006 | 35 | 9  | 32      | 12.584  | S         | 0.500   | 0.581  |        |
| S04C | 2006 | 35 | 9  | 32      | 30.825  | S         | 0.500   | 0.405  |        |
| R05C | 2006 | 35 | 9  | 32      | 33.944  | S         | 0.500   | 0.482  |        |
| SDD  | 2006 | 35 | 9  | 31      | 19.104  | S         | 0.500   | 0.237  |        |
| RPV  | 2006 | 35 | 9  | 31      | 27.667  | S         | 0.500   | 0.446  |        |
| SN71 | 2006 | 35 | 9  | 32      | 22.064  | S         | 0.500   | -2.381 |        |
| PKD  | 2006 | 35 | 9  | 32      | 8.540   | S         | 0.500   | 0.203  |        |
| SN25 | 2006 | 35 | 9  | 32      | 8.584   | S         | 0.500   | 0.096  |        |
| VES  | 2006 | 35 | 9  | 31      | 54.779  | S         | 0.500   | -0.226 |        |

|      |      |    |   |    |          |       |        |
|------|------|----|---|----|----------|-------|--------|
| PACP | 2006 | 35 | 9 | 32 | 24.932 S | 0.500 | -0.359 |
| TIN  | 2006 | 35 | 9 | 32 | 2.010 S  | 0.500 | 0.857  |
| R06C | 2006 | 35 | 9 | 32 | 27.984 S | 0.500 | 1.402  |
| DGR  | 2006 | 35 | 9 | 31 | 14.706 S | 0.500 | 0.219  |
| MNV  | 2006 | 35 | 9 | 32 | 16.117 S | 0.500 | 0.433  |
| BBR  | 2006 | 35 | 9 | 31 | 21.403 S | 0.500 | 0.843  |
| R04C | 2006 | 35 | 9 | 32 | 34.450 S | 0.500 | -0.439 |
| FMP  | 2006 | 35 | 9 | 31 | 26.439 S | 0.500 | 0.419  |
| SVD  | 2006 | 35 | 9 | 31 | 20.873 S | 0.500 | 0.857  |
| DEC  | 2006 | 35 | 9 | 31 | 31.998 S | 0.500 | -0.077 |
| OSI  | 2006 | 35 | 9 | 31 | 39.161 S | 0.500 | -0.029 |
| CIA  | 2006 | 35 | 9 | 31 | 23.723 S | 0.500 | -0.047 |
| SN27 | 2006 | 35 | 9 | 32 | 10.205 S | 0.500 | 1.370  |
| PAS  | 2006 | 35 | 9 | 31 | 30.303 S | 0.500 | 0.765  |
| MUR  | 2006 | 35 | 9 | 31 | 15.890 S | 0.500 | 0.429  |
| LGU  | 2006 | 35 | 9 | 31 | 36.646 S | 0.500 | -0.149 |
| HEC  | 2006 | 35 | 9 | 31 | 22.053 S | 0.500 | 0.204  |
| VTV  | 2006 | 35 | 9 | 31 | 27.086 S | 0.500 | 0.041  |
| LRL  | 2006 | 35 | 9 | 31 | 39.946 S | 0.500 | 0.044  |
| DJJ  | 2006 | 35 | 9 | 31 | 32.275 S | 0.500 | 0.656  |
| SLA  | 2006 | 35 | 9 | 31 | 41.600 S | 0.500 | 0.507  |
| RRX  | 2006 | 35 | 9 | 31 | 27.699 S | 0.500 | 0.052  |
| TOV  | 2006 | 35 | 9 | 31 | 35.180 S | 0.500 | -0.021 |
| SN16 | 2006 | 35 | 9 | 32 | 5.261 S  | 0.500 | 0.502  |
| GRA  | 2006 | 35 | 9 | 31 | 54.563 S | 0.500 | 0.738  |
| SN76 | 2006 | 35 | 9 | 32 | 26.406 S | 0.500 | 0.981  |
| CWC  | 2006 | 35 | 9 | 31 | 54.936 S | 0.500 | 1.436  |
| BFS  | 2006 | 35 | 9 | 31 | 26.841 S | 0.500 | 0.396  |
| BNLO | 2006 | 35 | 9 | 32 | 33.572 S | 0.500 | -0.379 |
| FUR  | 2006 | 35 | 9 | 31 | 44.292 S | 0.500 | 0.383  |
| GSC  | 2006 | 35 | 9 | 31 | 31.263 S | 0.500 | 0.439  |
| S08C | 2006 | 35 | 9 | 32 | 6.482 S  | 0.500 | 0.458  |
| MWC  | 2006 | 35 | 9 | 31 | 29.746 S | 0.500 | 0.114  |
| SHO  | 2006 | 35 | 9 | 31 | 33.560 S | 0.500 | 0.493  |
| ISA  | 2006 | 35 | 9 | 31 | 48.896 S | 0.500 | 0.579  |
| VCS  | 2006 | 35 | 9 | 31 | 32.220 S | 0.500 | -0.635 |
| SN23 | 2006 | 35 | 9 | 32 | 7.513 S  | 0.500 | -2.450 |

|      |      |    |    |         |           |            |         |    |        |
|------|------|----|----|---------|-----------|------------|---------|----|--------|
| 2006 | 47   | 14 | 54 | 50.9252 | -15.98000 | -173.02000 | 10.0000 | 15 | 11.965 |
| ADO  | 2006 | 47 | 15 | 15      | 46.345 S  | 0.500      | -1.454  |    |        |
| PACP | 2006 | 47 | 15 | 15      | 35.682 S  | 0.500      | 0.881   |    |        |
| HAST | 2006 | 47 | 15 | 15      | 28.652 S  | 0.500      | 0.398   |    |        |
| PKD  | 2006 | 47 | 15 | 15      | 33.473 S  | 0.500      | 0.754   |    |        |
| SAO  | 2006 | 47 | 15 | 15      | 31.927 S  | 0.500      | 0.077   |    |        |
| M08A | 2006 | 47 | 15 | 16      | 23.761 S  | 0.500      | -1.112  |    |        |
| CIA  | 2006 | 47 | 15 | 15      | 31.814 S  | 0.500      | -0.840  |    |        |
| SN85 | 2006 | 47 | 15 | 15      | 53.254 S  | 0.500      | -0.140  |    |        |
| I03A | 2006 | 47 | 15 | 16      | 10.448 S  | 0.500      | -0.050  |    |        |
| OSI  | 2006 | 47 | 15 | 15      | 37.720 S  | 0.500      | -0.394  |    |        |
| PLM  | 2006 | 47 | 15 | 15      | 44.338 S  | 0.500      | -0.498  |    |        |
| SVD  | 2006 | 47 | 15 | 15      | 47.254 S  | 0.500      | -0.309  |    |        |
| M06C | 2006 | 47 | 15 | 16      | 8.302 S   | 0.500      | -0.997  |    |        |
| L02A | 2006 | 47 | 15 | 15      | 56.812 S  | 0.500      | 1.432   |    |        |
| MOD  | 2006 | 47 | 15 | 16      | 14.893 S  | 0.500      | -0.264  |    |        |
| TIN  | 2006 | 47 | 15 | 15      | 57.406 S  | 0.500      | -0.273  |    |        |
| SN71 | 2006 | 47 | 15 | 15      | 45.163 S  | 0.500      | -0.015  |    |        |
| VCS  | 2006 | 47 | 15 | 15      | 40.810 S  | 0.500      | -0.970  |    |        |
| MNV  | 2006 | 47 | 15 | 16      | 7.142 S   | 0.500      | 0.140   |    |        |
| M05C | 2006 | 47 | 15 | 16      | 5.009 S   | 0.500      | -0.906  |    |        |
| YBH  | 2006 | 47 | 15 | 15      | 58.747 S  | 0.500      | 0.623   |    |        |
| N08A | 2006 | 47 | 15 | 16      | 21.440 S  | 0.500      | -0.728  |    |        |
| GSC  | 2006 | 47 | 15 | 15      | 56.867 S  | 0.500      | -0.311  |    |        |
| P05C | 2006 | 47 | 15 | 15      | 55.253 S  | 0.500      | -0.194  |    |        |

|      |      |    |    |    |          |       |        |
|------|------|----|----|----|----------|-------|--------|
| DGR  | 2006 | 47 | 15 | 15 | 44.735 S | 0.500 | -0.519 |
| O05C | 2006 | 47 | 15 | 15 | 56.665 S | 0.500 | -0.885 |
| SN47 | 2006 | 47 | 15 | 16 | 1.522 S  | 0.500 | 1.315  |
| ORV  | 2006 | 47 | 15 | 15 | 51.098 S | 0.500 | 0.384  |
| SN48 | 2006 | 47 | 15 | 16 | 3.536 S  | 0.500 | 0.883  |
| SN28 | 2006 | 47 | 15 | 16 | 4.042 S  | 0.500 | 0.339  |
| SN14 | 2006 | 47 | 15 | 15 | 53.926 S | 0.500 | -0.666 |
| SN38 | 2006 | 47 | 15 | 16 | 4.091 S  | 0.500 | 0.789  |
| MLAC | 2006 | 47 | 15 | 15 | 58.352 S | 0.500 | 1.237  |
| SHO  | 2006 | 47 | 15 | 16 | 4.159 S  | 0.500 | -0.781 |
| SN46 | 2006 | 47 | 15 | 15 | 59.087 S | 0.500 | 1.138  |
| GRA  | 2006 | 47 | 15 | 16 | 2.286 S  | 0.500 | -1.287 |
| SN26 | 2006 | 47 | 15 | 15 | 59.495 S | 0.500 | 0.335  |
| SN27 | 2006 | 47 | 15 | 16 | 2.704 S  | 0.500 | 1.822  |
| R04C | 2006 | 47 | 15 | 15 | 45.342 S | 0.500 | -0.283 |
| SN15 | 2006 | 47 | 15 | 15 | 56.612 S | 0.500 | 0.035  |
| SN52 | 2006 | 47 | 15 | 15 | 47.840 S | 0.500 | 0.141  |
| SN22 | 2006 | 47 | 15 | 15 | 48.029 S | 0.500 | -1.082 |
| HUMO | 2006 | 47 | 15 | 16 | 3.122 S  | 0.500 | 0.361  |
| CMB  | 2006 | 47 | 15 | 15 | 48.971 S | 0.500 | 0.765  |
| ISA  | 2006 | 47 | 15 | 15 | 46.938 S | 0.500 | 0.251  |
| LAVA | 2006 | 47 | 15 | 15 | 51.269 S | 0.500 | 0.720  |
| SN62 | 2006 | 47 | 15 | 15 | 48.025 S | 0.500 | -0.097 |
| S05C | 2006 | 47 | 15 | 15 | 43.376 S | 0.500 | -0.590 |
| SN25 | 2006 | 47 | 15 | 15 | 56.527 S | 0.500 | 0.012  |
| SN65 | 2006 | 47 | 15 | 15 | 55.350 S | 0.500 | 0.330  |
| SN36 | 2006 | 47 | 15 | 15 | 59.620 S | 0.500 | 0.695  |
| T06C | 2006 | 47 | 15 | 15 | 45.801 S | 0.500 | -0.464 |
| SN55 | 2006 | 47 | 15 | 15 | 56.324 S | 0.500 | 0.890  |
| SN37 | 2006 | 47 | 15 | 16 | 1.275 S  | 0.500 | 0.774  |
| S08C | 2006 | 47 | 15 | 16 | 1.721 S  | 0.500 | 0.431  |
| HELL | 2006 | 47 | 15 | 15 | 47.818 S | 0.500 | -1.564 |
| SN44 | 2006 | 47 | 15 | 15 | 53.384 S | 0.500 | 0.466  |
| SN66 | 2006 | 47 | 15 | 15 | 57.563 S | 0.500 | 0.317  |
| LRL  | 2006 | 47 | 15 | 15 | 51.810 S | 0.500 | 0.199  |
| SN73 | 2006 | 47 | 15 | 15 | 48.999 S | 0.500 | 0.099  |
| SN54 | 2006 | 47 | 15 | 15 | 53.168 S | 0.500 | 0.253  |
| SN23 | 2006 | 47 | 15 | 15 | 50.500 S | 0.500 | -0.658 |
| R05C | 2006 | 47 | 15 | 15 | 55.373 S | 0.500 | -0.062 |
| SN51 | 2006 | 47 | 15 | 15 | 45.214 S | 0.500 | 0.048  |
| SN53 | 2006 | 47 | 15 | 15 | 50.407 S | 0.500 | 0.261  |
| SN21 | 2006 | 47 | 15 | 15 | 45.335 S | 0.500 | -1.067 |
| KCC  | 2006 | 47 | 15 | 15 | 51.369 S | 0.500 | -0.053 |
| S06C | 2006 | 47 | 15 | 15 | 51.330 S | 0.500 | -0.086 |

|      |    |   |    |        |           |            |         |
|------|----|---|----|--------|-----------|------------|---------|
| 2006 | 57 | 4 | 19 | 0.5491 | -15.28300 | -176.23900 | 32.5000 |
|------|----|---|----|--------|-----------|------------|---------|

|    |        |
|----|--------|
| 16 | 18.439 |
|----|--------|

|      |      |    |   |    |          |       |        |
|------|------|----|---|----|----------|-------|--------|
| SN11 | 2006 | 57 | 4 | 40 | 7.916 S  | 0.500 | -1.294 |
| MCCM | 2006 | 57 | 4 | 39 | 50.616 S | 0.500 | -1.297 |
| PACP | 2006 | 57 | 4 | 39 | 56.999 S | 0.500 | 0.318  |
| GASB | 2006 | 57 | 4 | 40 | 3.778 S  | 0.500 | 0.384  |
| PKD  | 2006 | 57 | 4 | 39 | 56.261 S | 0.500 | 0.949  |
| V03C | 2006 | 57 | 4 | 39 | 51.168 S | 0.500 | 0.739  |
| SDD  | 2006 | 57 | 4 | 40 | 3.799 S  | 0.500 | 0.248  |
| SDP  | 2006 | 57 | 4 | 39 | 47.262 S | 0.500 | -0.048 |
| SCZ2 | 2006 | 57 | 4 | 39 | 50.810 S | 0.500 | 0.386  |
| CVS  | 2006 | 57 | 4 | 39 | 55.734 S | 0.500 | -0.867 |
| T05C | 2006 | 57 | 4 | 40 | 1.547 S  | 0.500 | 1.134  |
| BDM  | 2006 | 57 | 4 | 39 | 58.605 S | 0.500 | 0.531  |
| FARB | 2006 | 57 | 4 | 39 | 48.004 S | 0.500 | -0.036 |
| CIA  | 2006 | 57 | 4 | 39 | 56.675 S | 0.500 | -0.288 |
| MNRC | 2006 | 57 | 4 | 40 | 1.015 S  | 0.500 | 0.859  |
| SN65 | 2006 | 57 | 4 | 40 | 16.636 S | 0.500 | 0.061  |
| U05C | 2006 | 57 | 4 | 40 | 2.544 S  | 0.500 | 1.593  |

|      |      |    |   |    |        |   |       |        |
|------|------|----|---|----|--------|---|-------|--------|
| JRSC | 2006 | 57 | 4 | 39 | 51.833 | S | 0.500 | 0.054  |
| PIN  | 2006 | 57 | 4 | 40 | 41.012 | S | 0.500 | -1.490 |
| ARV  | 2006 | 57 | 4 | 40 | 4.037  | S | 0.500 | 0.494  |
| USC  | 2006 | 57 | 4 | 40 | 1.854  | S | 0.500 | 0.628  |
| P07A | 2006 | 57 | 4 | 40 | 28.983 | S | 0.500 | -0.785 |
| TIN  | 2006 | 57 | 4 | 40 | 20.234 | S | 0.500 | 0.329  |
| LGU  | 2006 | 57 | 4 | 39 | 55.557 | S | 0.500 | -0.245 |
| V05C | 2006 | 57 | 4 | 40 | 0.890  | S | 0.500 | 1.091  |
| V04C | 2006 | 57 | 4 | 39 | 51.553 | S | 0.500 | 0.548  |
| BNLO | 2006 | 57 | 4 | 39 | 50.380 | S | 0.500 | -0.325 |
| I06A | 2006 | 57 | 4 | 40 | 46.378 | S | 0.500 | -0.996 |
| O01C | 2006 | 57 | 4 | 39 | 58.862 | S | 0.500 | 0.093  |
| O05C | 2006 | 57 | 4 | 40 | 16.490 | S | 0.500 | -1.283 |
| HAST | 2006 | 57 | 4 | 39 | 50.790 | S | 0.500 | 0.350  |
| BBR  | 2006 | 57 | 4 | 40 | 14.470 | S | 0.500 | 0.305  |
| SMM  | 2006 | 57 | 4 | 39 | 56.259 | S | 0.500 | 0.322  |
| J06A | 2006 | 57 | 4 | 40 | 42.716 | S | 0.500 | -0.936 |
| N08A | 2006 | 57 | 4 | 40 | 41.370 | S | 0.500 | -0.920 |
| BEK  | 2006 | 57 | 4 | 40 | 20.626 | S | 0.500 | -0.871 |
| S04C | 2006 | 57 | 4 | 39 | 59.633 | S | 0.500 | 0.307  |
| MPP  | 2006 | 57 | 4 | 39 | 55.143 | S | 0.500 | 0.252  |
| U04C | 2006 | 57 | 4 | 39 | 57.415 | S | 0.500 | 1.180  |
| R06C | 2006 | 57 | 4 | 40 | 20.164 | S | 0.500 | 0.492  |
| O08A | 2006 | 57 | 4 | 40 | 38.433 | S | 0.500 | -1.027 |
| OSI  | 2006 | 57 | 4 | 40 | 1.747  | S | 0.500 | 0.041  |
| PLM  | 2006 | 57 | 4 | 40 | 9.763  | S | 0.500 | 0.455  |
| R07C | 2006 | 57 | 4 | 40 | 21.005 | S | 0.500 | 0.851  |
| TOV  | 2006 | 57 | 4 | 39 | 57.738 | S | 0.500 | -0.133 |
| SN67 | 2006 | 57 | 4 | 40 | 21.244 | S | 0.500 | 0.587  |
| SN85 | 2006 | 57 | 4 | 40 | 14.521 | S | 0.500 | -0.186 |
| JCS  | 2006 | 57 | 4 | 40 | 10.246 | S | 0.500 | 0.198  |
| MLAC | 2006 | 57 | 4 | 40 | 20.682 | S | 0.500 | 1.735  |
| MUR  | 2006 | 57 | 4 | 40 | 7.953  | S | 0.500 | 0.071  |
| DBO  | 2006 | 57 | 4 | 40 | 22.249 | S | 0.500 | -0.528 |
| O06A | 2006 | 57 | 4 | 40 | 25.729 | S | 0.500 | -1.300 |
| HELL | 2006 | 57 | 4 | 40 | 10.220 | S | 0.500 | -1.522 |
| GRA  | 2006 | 57 | 4 | 40 | 25.285 | S | 0.500 | -0.640 |
| M08A | 2006 | 57 | 4 | 40 | 43.589 | S | 0.500 | -0.998 |
| HEC  | 2006 | 57 | 4 | 40 | 20.470 | S | 0.500 | -0.998 |
| SN36 | 2006 | 57 | 4 | 40 | 21.592 | S | 0.500 | 0.841  |
| CHF  | 2006 | 57 | 4 | 40 | 5.264  | S | 0.500 | -0.322 |
| FMP  | 2006 | 57 | 4 | 39 | 59.783 | S | 0.500 | 0.235  |
| RPV  | 2006 | 57 | 4 | 39 | 59.036 | S | 0.500 | 0.046  |
| VTV  | 2006 | 57 | 4 | 40 | 11.612 | S | 0.500 | -0.567 |
| SN55 | 2006 | 57 | 4 | 40 | 17.302 | S | 0.500 | 0.223  |
| WVOR | 2006 | 57 | 4 | 40 | 48.023 | S | 0.500 | -0.498 |
| GSC  | 2006 | 57 | 4 | 40 | 21.133 | S | 0.500 | 0.572  |
| SN66 | 2006 | 57 | 4 | 40 | 19.068 | S | 0.500 | 0.369  |
| SLA  | 2006 | 57 | 4 | 40 | 20.935 | S | 0.500 | 0.544  |
| SN47 | 2006 | 57 | 4 | 40 | 24.215 | S | 0.500 | 2.372  |
| P05C | 2006 | 57 | 4 | 40 | 15.748 | S | 0.500 | -0.362 |
| RRX  | 2006 | 57 | 4 | 40 | 15.619 | S | 0.500 | -0.947 |
| EDW2 | 2006 | 57 | 4 | 40 | 8.680  | S | 0.500 | -0.119 |
| SN28 | 2006 | 57 | 4 | 40 | 26.397 | S | 0.500 | 0.935  |
| L02A | 2006 | 57 | 4 | 40 | 14.710 | S | 0.500 | 0.777  |
| SVD  | 2006 | 57 | 4 | 40 | 12.127 | S | 0.500 | 0.546  |
| SN14 | 2006 | 57 | 4 | 40 | 16.494 | S | 0.500 | -0.223 |
| M06C | 2006 | 57 | 4 | 40 | 28.089 | S | 0.500 | -0.790 |
| PAS  | 2006 | 57 | 4 | 40 | 3.179  | S | 0.500 | 0.174  |
| SN53 | 2006 | 57 | 4 | 40 | 11.852 | S | 0.500 | -0.087 |
| Q04C | 2006 | 57 | 4 | 40 | 6.991  | S | 0.500 | -0.241 |
| VES  | 2006 | 57 | 4 | 40 | 5.079  | S | 0.500 | -0.638 |
| SN26 | 2006 | 57 | 4 | 40 | 21.599 | S | 0.500 | 0.533  |



|      |      |    |   |    |        |   |       |        |
|------|------|----|---|----|--------|---|-------|--------|
| ADO  | 2006 | 57 | 4 | 40 | 10.785 | S | 0.500 | -0.745 |
| M07A | 2006 | 57 | 4 | 40 | 38.238 | S | 0.500 | -0.720 |
| CWC  | 2006 | 57 | 4 | 40 | 17.583 | S | 0.500 | -0.092 |
| DJJ  | 2006 | 57 | 4 | 40 | 0.433  | S | 0.500 | -0.082 |
| ELFS | 2006 | 57 | 4 | 40 | 22.399 | S | 0.500 | -1.069 |
| R05C | 2006 | 57 | 4 | 40 | 16.335 | S | 0.500 | -0.163 |
| N07A | 2006 | 57 | 4 | 40 | 35.576 | S | 0.500 | -0.843 |
| BFS  | 2006 | 57 | 4 | 40 | 8.260  | S | 0.500 | 0.422  |
| M04C | 2006 | 57 | 4 | 40 | 22.896 | S | 0.500 | -0.306 |
| SN38 | 2006 | 57 | 4 | 40 | 26.086 | S | 0.500 | 1.127  |
| KCC  | 2006 | 57 | 4 | 40 | 13.467 | S | 0.500 | 0.090  |
| ORV  | 2006 | 57 | 4 | 40 | 10.618 | S | 0.500 | -0.454 |
| MPM  | 2006 | 57 | 4 | 40 | 20.582 | S | 0.500 | 0.830  |
| SN46 | 2006 | 57 | 4 | 40 | 21.122 | S | 0.500 | 1.432  |
| SN44 | 2006 | 57 | 4 | 40 | 15.285 | S | 0.500 | 0.500  |
| SN54 | 2006 | 57 | 4 | 40 | 14.856 | S | 0.500 | 0.250  |
| LRL  | 2006 | 57 | 4 | 40 | 15.644 | S | 0.500 | 0.828  |
| SN16 | 2006 | 57 | 4 | 40 | 22.047 | S | 0.500 | 0.389  |
| MOD  | 2006 | 57 | 4 | 40 | 34.113 | S | 0.500 | -0.263 |
| I03A | 2006 | 57 | 4 | 40 | 28.093 | S | 0.500 | 0.024  |
| SHO  | 2006 | 57 | 4 | 40 | 28.279 | S | 0.500 | 0.272  |
| DGR  | 2006 | 57 | 4 | 40 | 10.128 | S | 0.500 | 0.583  |
| J02A | 2006 | 57 | 4 | 40 | 22.550 | S | 0.500 | 0.497  |
| O04C | 2006 | 57 | 4 | 40 | 17.449 | S | 0.500 | -1.612 |
| HUMO | 2006 | 57 | 4 | 40 | 21.631 | S | 0.500 | 0.454  |
| SN71 | 2006 | 57 | 4 | 40 | 6.487  | S | 0.500 | -0.308 |
| M03C | 2006 | 57 | 4 | 40 | 16.753 | S | 0.500 | -1.450 |
| S05C | 2006 | 57 | 4 | 40 | 5.031  | S | 0.500 | -0.742 |
| SUTB | 2006 | 57 | 4 | 40 | 6.206  | S | 0.500 | -0.902 |
| SN37 | 2006 | 57 | 4 | 40 | 23.082 | S | 0.500 | 0.812  |
| M05C | 2006 | 57 | 4 | 40 | 24.610 | S | 0.500 | -0.704 |
| O02C | 2006 | 57 | 4 | 40 | 6.445  | S | 0.500 | 0.074  |
| LAVA | 2006 | 57 | 4 | 40 | 11.608 | S | 0.500 | 0.119  |
| SN23 | 2006 | 57 | 4 | 40 | 12.476 | S | 0.500 | -0.756 |
| SN25 | 2006 | 57 | 4 | 40 | 18.978 | S | 0.500 | 0.446  |
| R04C | 2006 | 57 | 4 | 40 | 6.538  | S | 0.500 | -0.281 |
| SN52 | 2006 | 57 | 4 | 40 | 9.265  | S | 0.500 | -0.301 |
| S08C | 2006 | 57 | 4 | 40 | 24.251 | S | 0.500 | 0.966  |
| SN48 | 2006 | 57 | 4 | 40 | 25.340 | S | 0.500 | 1.132  |
| SN15 | 2006 | 57 | 4 | 40 | 18.920 | S | 0.500 | 0.284  |
| SN76 | 2006 | 57 | 4 | 40 | 18.727 | S | 0.500 | 0.168  |
| SN21 | 2006 | 57 | 4 | 40 | 7.548  | S | 0.500 | -1.068 |
| ISA  | 2006 | 57 | 4 | 40 | 9.986  | S | 0.500 | 0.299  |
| M02C | 2006 | 57 | 4 | 40 | 14.079 | S | 0.500 | 0.247  |
| YBH  | 2006 | 57 | 4 | 40 | 17.338 | S | 0.500 | 0.269  |
| SN51 | 2006 | 57 | 4 | 40 | 6.859  | S | 0.500 | -0.199 |
| RCT  | 2006 | 57 | 4 | 40 | 6.034  | S | 0.500 | -1.453 |
| VCS  | 2006 | 57 | 4 | 40 | 5.424  | S | 0.500 | -0.068 |
| HOPS | 2006 | 57 | 4 | 39 | 56.418 | S | 0.500 | 0.133  |
| SN73 | 2006 | 57 | 4 | 40 | 10.209 | S | 0.500 | -0.243 |
| SN27 | 2006 | 57 | 4 | 40 | 24.672 | S | 0.500 | 1.916  |
| SN62 | 2006 | 57 | 4 | 40 | 9.434  | S | 0.500 | -0.393 |
| CMB  | 2006 | 57 | 4 | 40 | 10.022 | S | 0.500 | 0.416  |
| S06C | 2006 | 57 | 4 | 40 | 12.491 | S | 0.500 | -0.501 |
| SN22 | 2006 | 57 | 4 | 40 | 10.302 | S | 0.500 | -0.937 |
| T06C | 2006 | 57 | 4 | 40 | 7.882  | S | 0.500 | -0.458 |
| PHL  | 2006 | 57 | 4 | 39 | 52.253 | S | 0.500 | 0.186  |

|      |      |     |    |         |           |           |         |       |       |
|------|------|-----|----|---------|-----------|-----------|---------|-------|-------|
| 2006 | 120  | 19  | 17 | 22.0886 | -27.01700 | -71.02200 | 12.0000 | 18    | 7.109 |
| J02A | 2006 | 120 | 19 | 40      | 25.680    | S         | 0.500   | 5.189 |       |

|      |      |     |    |        |           |           |         |       |        |
|------|------|-----|----|--------|-----------|-----------|---------|-------|--------|
| 2006 | 120  | 21  | 41 | 8.5709 | -27.21100 | -71.05600 | 12.0000 | 19    | 10.131 |
| R06C | 2006 | 120 | 22 | 3      | 18.751    | S         | 0.500   | 1.303 |        |

|      |      |     |    |   |        |   |       |        |
|------|------|-----|----|---|--------|---|-------|--------|
| CIA  | 2006 | 120 | 22 | 2 | 31.114 | S | 0.500 | 0.872  |
| O02C | 2006 | 120 | 22 | 3 | 45.332 | S | 0.500 | -2.732 |
| GSC  | 2006 | 120 | 22 | 2 | 37.682 | S | 0.500 | 1.420  |
| SHO  | 2006 | 120 | 22 | 2 | 38.660 | S | 0.500 | 0.912  |
| SN26 | 2006 | 120 | 22 | 3 | 4.412  | S | 0.500 | -0.129 |
| SN11 | 2006 | 120 | 22 | 2 | 59.135 | S | 0.500 | -2.733 |
| VCS  | 2006 | 120 | 22 | 2 | 37.409 | S | 0.500 | -0.086 |
| MUR  | 2006 | 120 | 22 | 2 | 25.779 | S | 0.500 | 1.359  |
| BFS  | 2006 | 120 | 22 | 2 | 33.506 | S | 0.500 | 0.789  |
| MOD  | 2006 | 120 | 22 | 3 | 47.221 | S | 0.500 | -0.217 |
| MWC  | 2006 | 120 | 22 | 2 | 35.322 | S | 0.500 | 0.342  |
| Q09A | 2006 | 120 | 22 | 3 | 6.835  | S | 0.500 | -0.402 |
| CHF  | 2006 | 120 | 22 | 2 | 36.172 | S | 0.500 | 0.583  |
| N09A | 2006 | 120 | 22 | 3 | 23.772 | S | 0.500 | -1.231 |
| SN52 | 2006 | 120 | 22 | 3 | 8.184  | S | 0.500 | -1.837 |
| JCS  | 2006 | 120 | 22 | 2 | 18.013 | S | 0.500 | 1.591  |
| PAS  | 2006 | 120 | 22 | 2 | 35.699 | S | 0.500 | 0.917  |
| PHL  | 2006 | 120 | 22 | 2 | 59.601 | S | 0.500 | 0.046  |
| CVS  | 2006 | 120 | 22 | 3 | 32.434 | S | 0.500 | -0.372 |
| I06A | 2006 | 120 | 22 | 4 | 3.291  | S | 0.500 | 3.122  |
| SN15 | 2006 | 120 | 22 | 3 | 2.712  | S | 0.500 | -0.396 |
| O09A | 2006 | 120 | 22 | 3 | 16.757 | S | 0.500 | -1.166 |
| BBR  | 2006 | 120 | 22 | 2 | 30.020 | S | 0.500 | 1.594  |
| KCC  | 2006 | 120 | 22 | 3 | 5.137  | S | 0.500 | -2.068 |
| ORV  | 2006 | 120 | 22 | 3 | 35.455 | S | 0.500 | -0.645 |
| SN36 | 2006 | 120 | 22 | 3 | 6.198  | S | 0.500 | -0.345 |
| GRA  | 2006 | 120 | 22 | 2 | 53.963 | S | 0.500 | 0.696  |
| SN14 | 2006 | 120 | 22 | 3 | 2.361  | S | 0.500 | -0.847 |
| SN37 | 2006 | 120 | 22 | 3 | 7.136  | S | 0.500 | 0.423  |
| TPNV | 2006 | 120 | 22 | 2 | 47.598 | S | 0.500 | 1.082  |
| Q04C | 2006 | 120 | 22 | 3 | 30.181 | S | 0.500 | -0.108 |
| RRX  | 2006 | 120 | 22 | 2 | 34.426 | S | 0.500 | 0.609  |
| S09A | 2006 | 120 | 22 | 2 | 58.937 | S | 0.500 | 0.549  |
| M06C | 2006 | 120 | 22 | 3 | 42.461 | S | 0.500 | -0.630 |
| M09A | 2006 | 120 | 22 | 3 | 27.647 | S | 0.500 | -1.387 |
| MNRC | 2006 | 120 | 22 | 3 | 37.515 | S | 0.500 | 0.930  |
| Q07A | 2006 | 120 | 22 | 3 | 17.289 | S | 0.500 | 0.383  |
| PLM  | 2006 | 120 | 22 | 2 | 22.017 | S | 0.500 | 1.485  |
| ARV  | 2006 | 120 | 22 | 2 | 46.473 | S | 0.500 | -0.088 |
| O04C | 2006 | 120 | 22 | 3 | 38.242 | S | 0.500 | -1.657 |
| Q08A | 2006 | 120 | 22 | 3 | 11.480 | S | 0.500 | 0.120  |
| BEK  | 2006 | 120 | 22 | 3 | 32.010 | S | 0.500 | -0.565 |
| O08A | 2006 | 120 | 22 | 3 | 22.586 | S | 0.500 | -1.573 |
| FUR  | 2006 | 120 | 22 | 2 | 47.105 | S | 0.500 | 1.305  |
| M08A | 2006 | 120 | 22 | 3 | 33.339 | S | 0.500 | -0.614 |
| P06A | 2006 | 120 | 22 | 3 | 29.125 | S | 0.500 | 0.346  |
| LAVA | 2006 | 120 | 22 | 3 | 25.981 | S | 0.500 | -0.244 |
| PKD  | 2006 | 120 | 22 | 3 | 2.897  | S | 0.500 | -0.755 |
| O05C | 2006 | 120 | 22 | 3 | 35.257 | S | 0.500 | -0.956 |
| MCCM | 2006 | 120 | 22 | 3 | 33.030 | S | 0.500 | -0.596 |
| JRSC | 2006 | 120 | 22 | 3 | 24.297 | S | 0.500 | -0.142 |
| MPM  | 2006 | 120 | 22 | 2 | 47.668 | S | 0.500 | 0.993  |
| P07A | 2006 | 120 | 22 | 3 | 21.836 | S | 0.500 | -0.064 |
| SN16 | 2006 | 120 | 22 | 3 | 1.327  | S | 0.500 | -0.092 |
| VES  | 2006 | 120 | 22 | 2 | 52.951 | S | 0.500 | -1.029 |
| N08A | 2006 | 120 | 22 | 3 | 26.523 | S | 0.500 | -1.231 |
| FARB | 2006 | 120 | 22 | 3 | 30.209 | S | 0.500 | -1.056 |
| SN47 | 2006 | 120 | 22 | 3 | 11.361 | S | 0.500 | 2.325  |
| HEC  | 2006 | 120 | 22 | 2 | 30.601 | S | 0.500 | 1.095  |
| V04C | 2006 | 120 | 22 | 3 | 3.379  | S | 0.500 | 0.058  |
| M07A | 2006 | 120 | 22 | 3 | 37.352 | S | 0.500 | -0.426 |
| MPP  | 2006 | 120 | 22 | 2 | 50.736 | S | 0.500 | -0.380 |
| SN27 | 2006 | 120 | 22 | 3 | 6.045  | S | 0.500 | 1.580  |

|      |      |     |    |   |        |   |       |        |
|------|------|-----|----|---|--------|---|-------|--------|
| SN54 | 2006 | 120 | 22 | 3 | 11.220 | S | 0.500 | -0.411 |
| SN51 | 2006 | 120 | 22 | 3 | 8.841  | S | 0.500 | -1.996 |
| SN55 | 2006 | 120 | 22 | 3 | 12.123 | S | 0.500 | 0.098  |
| O07A | 2006 | 120 | 22 | 3 | 26.005 | S | 0.500 | -0.750 |
| R04C | 2006 | 120 | 22 | 3 | 23.114 | S | 0.500 | -0.180 |
| N07B | 2006 | 120 | 22 | 3 | 31.235 | S | 0.500 | -0.780 |
| CWC  | 2006 | 120 | 22 | 2 | 53.857 | S | 0.500 | 0.775  |
| WVOR | 2006 | 120 | 22 | 3 | 42.690 | S | 0.500 | -0.286 |
| SN28 | 2006 | 120 | 22 | 3 | 6.089  | S | 0.500 | 0.801  |
| BDM  | 2006 | 120 | 22 | 3 | 27.237 | S | 0.500 | 0.682  |
| ISA  | 2006 | 120 | 22 | 2 | 50.254 | S | 0.500 | 1.141  |
| SVD  | 2006 | 120 | 22 | 2 | 29.550 | S | 0.500 | 1.660  |
| S06C | 2006 | 120 | 22 | 3 | 14.066 | S | 0.500 | -0.567 |
| L09A | 2006 | 120 | 22 | 3 | 33.873 | S | 0.500 | -1.035 |
| SN46 | 2006 | 120 | 22 | 3 | 9.632  | S | 0.500 | 0.861  |
| R07C | 2006 | 120 | 22 | 3 | 13.104 | S | 0.500 | 1.415  |
| SN38 | 2006 | 120 | 22 | 3 | 8.318  | S | 0.500 | 0.869  |
| S04C | 2006 | 120 | 22 | 3 | 20.412 | S | 0.500 | 0.522  |
| S08C | 2006 | 120 | 22 | 3 | 2.642  | S | 0.500 | 0.252  |
| HAST | 2006 | 120 | 22 | 3 | 12.971 | S | 0.500 | -0.068 |
| U04C | 2006 | 120 | 22 | 3 | 8.056  | S | 0.500 | -0.046 |
| O06A | 2006 | 120 | 22 | 3 | 31.659 | S | 0.500 | -0.307 |
| SN67 | 2006 | 120 | 22 | 3 | 16.138 | S | 0.500 | 2.102  |
| SN48 | 2006 | 120 | 22 | 3 | 10.902 | S | 0.500 | 1.345  |
| WCN  | 2006 | 120 | 22 | 3 | 26.093 | S | 0.500 | 0.896  |
| SN62 | 2006 | 120 | 22 | 3 | 11.731 | S | 0.500 | -1.324 |
| S05C | 2006 | 120 | 22 | 3 | 11.578 | S | 0.500 | -1.354 |
| P09A | 2006 | 120 | 22 | 3 | 11.487 | S | 0.500 | -1.354 |
| SN66 | 2006 | 120 | 22 | 3 | 15.069 | S | 0.500 | 0.782  |
| PACP | 2006 | 120 | 22 | 3 | 16.160 | S | 0.500 | 0.008  |
| SN71 | 2006 | 120 | 22 | 3 | 14.533 | S | 0.500 | -1.169 |
| SN73 | 2006 | 120 | 22 | 3 | 14.909 | S | 0.500 | -0.751 |
| SN76 | 2006 | 120 | 22 | 3 | 17.851 | S | 0.500 | 1.204  |
| N02C | 2006 | 120 | 22 | 3 | 52.452 | S | 0.500 | -3.063 |

|      |      |     |    |        |          |            |         |        |        |
|------|------|-----|----|--------|----------|------------|---------|--------|--------|
| 2006 | 130  | 2   | 43 | 2.5453 | 52.51500 | -169.25600 | 18.0000 | 21     | 11.515 |
| P05C | 2006 | 130 | 2  | 55     | 36.192   | S          | 0.500   | 0.847  |        |
| VCS  | 2006 | 130 | 2  | 56     | 43.390   | S          | 0.500   | -1.995 |        |
| HEC  | 2006 | 130 | 2  | 56     | 57.611   | S          | 0.500   | -0.430 |        |
| WDC  | 2006 | 130 | 2  | 55     | 4.521    | S          | 0.500   | -0.256 |        |
| SN23 | 2006 | 130 | 2  | 56     | 8.984    | S          | 0.500   | -0.348 |        |
| L09A | 2006 | 130 | 2  | 55     | 38.789   | S          | 0.500   | 0.836  |        |
| LRL  | 2006 | 130 | 2  | 56     | 38.470   | S          | 0.500   | -1.003 |        |
| BFS  | 2006 | 130 | 2  | 56     | 50.220   | S          | 0.500   | -1.870 |        |
| MNV  | 2006 | 130 | 2  | 56     | 6.832    | S          | 0.500   | 0.485  |        |
| O08A | 2006 | 130 | 2  | 55     | 49.541   | S          | 0.500   | 0.506  |        |
| S09A | 2006 | 130 | 2  | 56     | 22.769   | S          | 0.500   | 0.929  |        |
| WCN  | 2006 | 130 | 2  | 55     | 43.221   | S          | 0.500   | -0.128 |        |
| SN73 | 2006 | 130 | 2  | 55     | 52.214   | S          | 0.500   | -1.821 |        |
| R06C | 2006 | 130 | 2  | 55     | 53.725   | S          | 0.500   | 0.115  |        |
| M06C | 2006 | 130 | 2  | 55     | 19.831   | S          | 0.500   | 0.926  |        |
| SN46 | 2006 | 130 | 2  | 56     | 6.674    | S          | 0.500   | 0.713  |        |
| SN74 | 2006 | 130 | 2  | 55     | 52.402   | S          | 0.500   | -1.802 |        |
| BBR  | 2006 | 130 | 2  | 56     | 57.331   | S          | 0.500   | -1.474 |        |
| GRA  | 2006 | 130 | 2  | 56     | 29.281   | S          | 0.500   | 2.080  |        |
| SLA  | 2006 | 130 | 2  | 56     | 39.054   | S          | 0.500   | 0.066  |        |
| SN11 | 2006 | 130 | 2  | 56     | 9.263    | S          | 0.500   | -2.863 |        |
| DEC  | 2006 | 130 | 2  | 56     | 44.576   | S          | 0.500   | -1.110 |        |
| MUR  | 2006 | 130 | 2  | 57     | 1.330    | S          | 0.500   | -1.199 |        |
| M05C | 2006 | 130 | 2  | 55     | 11.459   | S          | 0.500   | 0.330  |        |
| R07C | 2006 | 130 | 2  | 56     | 2.130    | S          | 0.500   | 0.585  |        |
| SVD  | 2006 | 130 | 2  | 56     | 57.459   | S          | 0.500   | -0.962 |        |
| SN67 | 2006 | 130 | 2  | 56     | 0.032    | S          | 0.500   | 1.153  |        |

|      |      |     |   |    |        |   |       |        |
|------|------|-----|---|----|--------|---|-------|--------|
| SN14 | 2006 | 130 | 2 | 56 | 13.670 | S | 0.500 | 0.242  |
| SN66 | 2006 | 130 | 2 | 55 | 57.383 | S | 0.500 | -0.736 |
| SN55 | 2006 | 130 | 2 | 56 | 1.367  | S | 0.500 | 0.299  |
| SN38 | 2006 | 130 | 2 | 56 | 9.846  | S | 0.500 | 1.528  |
| SN48 | 2006 | 130 | 2 | 56 | 6.216  | S | 0.500 | 0.979  |
| SN15 | 2006 | 130 | 2 | 56 | 14.322 | S | 0.500 | 0.758  |
| SN47 | 2006 | 130 | 2 | 56 | 7.464  | S | 0.500 | 1.933  |
| SN37 | 2006 | 130 | 2 | 56 | 10.033 | S | 0.500 | 1.239  |
| SN54 | 2006 | 130 | 2 | 56 | 0.251  | S | 0.500 | -0.436 |
| MLAC | 2006 | 130 | 2 | 56 | 9.015  | S | 0.500 | 1.040  |
| SN26 | 2006 | 130 | 2 | 56 | 12.642 | S | 0.500 | 1.156  |
| TIN  | 2006 | 130 | 2 | 56 | 19.801 | S | 0.500 | 0.835  |
| SN36 | 2006 | 130 | 2 | 56 | 10.095 | S | 0.500 | 0.967  |
| SN16 | 2006 | 130 | 2 | 56 | 17.730 | S | 0.500 | 1.793  |
| SN27 | 2006 | 130 | 2 | 56 | 14.938 | S | 0.500 | 2.936  |
| O05C | 2006 | 130 | 2 | 55 | 26.595 | S | 0.500 | 0.603  |
| RCT  | 2006 | 130 | 2 | 56 | 14.545 | S | 0.500 | -1.999 |
| PIN  | 2006 | 130 | 2 | 54 | 50.284 | S | 0.500 | -2.192 |
| BMN  | 2006 | 130 | 2 | 55 | 54.302 | S | 0.500 | -2.131 |
| Q09A | 2006 | 130 | 2 | 56 | 11.176 | S | 0.500 | -0.348 |
| DJJ  | 2006 | 130 | 2 | 56 | 44.932 | S | 0.500 | -1.013 |
| GASB | 2006 | 130 | 2 | 55 | 11.098 | S | 0.500 | -1.062 |
| M08A | 2006 | 130 | 2 | 55 | 36.488 | S | 0.500 | 0.100  |
| ELFS | 2006 | 130 | 2 | 55 | 22.135 | S | 0.500 | 0.344  |
| LAVA | 2006 | 130 | 2 | 55 | 37.584 | S | 0.500 | -1.495 |
| MOD  | 2006 | 130 | 2 | 55 | 15.303 | S | 0.500 | 0.957  |
| K06A | 2006 | 130 | 2 | 55 | 8.269  | S | 0.500 | 1.400  |
| P09A | 2006 | 130 | 2 | 56 | 5.681  | S | 0.500 | 0.411  |
| SN64 | 2006 | 130 | 2 | 55 | 58.303 | S | 0.500 | 0.037  |
| WVOR | 2006 | 130 | 2 | 55 | 26.061 | S | 0.500 | 0.915  |
| CHF  | 2006 | 130 | 2 | 56 | 46.045 | S | 0.500 | -1.825 |
| FMP  | 2006 | 130 | 2 | 56 | 48.958 | S | 0.500 | -2.360 |
| GSC  | 2006 | 130 | 2 | 56 | 49.642 | S | 0.500 | 0.579  |
| N07B | 2006 | 130 | 2 | 55 | 37.419 | S | 0.500 | 0.565  |
| N08A | 2006 | 130 | 2 | 55 | 45.398 | S | 0.500 | 0.742  |
| N09A | 2006 | 130 | 2 | 55 | 50.359 | S | 0.500 | 0.679  |
| TOV  | 2006 | 130 | 2 | 56 | 41.173 | S | 0.500 | -0.992 |
| Q08A | 2006 | 130 | 2 | 56 | 5.008  | S | 0.500 | 0.696  |
| M07A | 2006 | 130 | 2 | 55 | 30.042 | S | 0.500 | 0.557  |
| O04C | 2006 | 130 | 2 | 55 | 20.886 | S | 0.500 | -0.389 |
| KCC  | 2006 | 130 | 2 | 56 | 6.259  | S | 0.500 | 0.100  |
| PAS  | 2006 | 130 | 2 | 56 | 47.114 | S | 0.500 | -1.043 |
| SN76 | 2006 | 130 | 2 | 55 | 53.988 | S | 0.500 | -0.669 |
| R08A | 2006 | 130 | 2 | 56 | 8.314  | S | 0.500 | 0.788  |
| S05C | 2006 | 130 | 2 | 55 | 53.818 | S | 0.500 | -2.588 |
| FUR  | 2006 | 130 | 2 | 56 | 39.798 | S | 0.500 | 3.034  |
| O07A | 2006 | 130 | 2 | 55 | 44.071 | S | 0.500 | 0.754  |

|      |      |     |    |         |          |           |         |        |        |
|------|------|-----|----|---------|----------|-----------|---------|--------|--------|
| 2006 | 360  | 12  | 26 | 33.3007 | 21.79900 | 120.54700 | 10.0000 | 30     | 12.161 |
| S04C | 2006 | 360 | 12 | 50      | 42.993   | S         | 0.500   | -0.476 |        |
| U05C | 2006 | 360 | 12 | 50      | 51.671   | S         | 0.500   | 1.212  |        |
| ADO  | 2006 | 360 | 12 | 51      | 4.886    | S         | 0.500   | -0.129 |        |
| K06A | 2006 | 360 | 12 | 50      | 31.465   | S         | 0.500   | 0.555  |        |
| VES  | 2006 | 360 | 12 | 50      | 53.331   | S         | 0.500   | -2.303 |        |
| HUMO | 2006 | 360 | 12 | 50      | 22.491   | S         | 0.500   | 0.093  |        |
| YBH  | 2006 | 360 | 12 | 50      | 25.417   | S         | 0.500   | -0.360 |        |
| CVS  | 2006 | 360 | 12 | 50      | 34.749   | S         | 0.500   | -2.232 |        |
| Q07A | 2006 | 360 | 12 | 50      | 47.743   | S         | 0.500   | 0.427  |        |
| I08A | 2006 | 360 | 12 | 50      | 33.391   | S         | 0.500   | 0.613  |        |
| M02C | 2006 | 360 | 12 | 50      | 26.264   | S         | 0.500   | -0.055 |        |
| SUTB | 2006 | 360 | 12 | 50      | 34.481   | S         | 0.500   | -2.053 |        |
| GASB | 2006 | 360 | 12 | 50      | 31.776   | S         | 0.500   | -0.623 |        |
| TPH  | 2006 | 360 | 12 | 50      | 55.573   | S         | 0.500   | 0.183  |        |

|      |      |     |    |    |        |   |       |        |
|------|------|-----|----|----|--------|---|-------|--------|
| SNCC | 2006 | 360 | 12 | 51 | 2.267  | S | 0.500 | 0.455  |
| I06A | 2006 | 360 | 12 | 50 | 28.114 | S | 0.500 | 0.737  |
| SDD  | 2006 | 360 | 12 | 51 | 8.353  | S | 0.500 | 1.709  |
| GRA  | 2006 | 360 | 12 | 50 | 58.154 | S | 0.500 | 0.459  |
| M09A | 2006 | 360 | 12 | 50 | 44.888 | S | 0.500 | 0.637  |
| U04C | 2006 | 360 | 12 | 50 | 48.220 | S | 0.500 | -0.220 |
| SN87 | 2006 | 360 | 12 | 50 | 46.216 | S | 0.500 | 0.182  |
| SAO  | 2006 | 360 | 12 | 50 | 44.454 | S | 0.500 | -0.556 |
| ARV  | 2006 | 360 | 12 | 50 | 59.427 | S | 0.500 | 1.081  |
| Q04C | 2006 | 360 | 12 | 50 | 38.532 | S | 0.500 | -0.400 |
| HAST | 2006 | 360 | 12 | 50 | 44.930 | S | 0.500 | -0.909 |
| FUR  | 2006 | 360 | 12 | 51 | 0.900  | S | 0.500 | 0.343  |
| PACP | 2006 | 360 | 12 | 50 | 44.835 | S | 0.500 | -0.121 |
| PKD  | 2006 | 360 | 12 | 50 | 50.392 | S | 0.500 | -0.164 |
| BBR  | 2006 | 360 | 12 | 51 | 7.789  | S | 0.500 | -0.075 |
| SBC  | 2006 | 360 | 12 | 50 | 57.919 | S | 0.500 | 0.209  |
| K07A | 2006 | 360 | 12 | 50 | 35.466 | S | 0.500 | 0.995  |
| SNF8 | 2006 | 360 | 12 | 50 | 36.814 | S | 0.500 | -1.692 |
| SN55 | 2006 | 360 | 12 | 50 | 50.126 | S | 0.500 | 0.741  |
| SCZ2 | 2006 | 360 | 12 | 50 | 58.797 | S | 0.500 | -0.171 |
| TIN  | 2006 | 360 | 12 | 50 | 55.739 | S | 0.500 | 0.490  |
| VTV  | 2006 | 360 | 12 | 51 | 5.189  | S | 0.500 | 0.154  |
| FMP  | 2006 | 360 | 12 | 51 | 5.110  | S | 0.500 | 0.986  |
| BEK  | 2006 | 360 | 12 | 50 | 38.382 | S | 0.500 | -1.623 |
| Q03C | 2006 | 360 | 12 | 50 | 37.975 | S | 0.500 | 0.501  |
| WVOR | 2006 | 360 | 12 | 50 | 38.254 | S | 0.500 | 1.258  |
| ORV  | 2006 | 360 | 12 | 50 | 34.273 | S | 0.500 | -2.526 |
| OSI  | 2006 | 360 | 12 | 51 | 1.545  | S | 0.500 | 0.980  |
| RPV  | 2006 | 360 | 12 | 51 | 4.413  | S | 0.500 | 0.464  |
| SNG5 | 2006 | 360 | 12 | 50 | 33.539 | S | 0.500 | -2.362 |
| SVD  | 2006 | 360 | 12 | 51 | 7.874  | S | 0.500 | 0.613  |
| TOV  | 2006 | 360 | 12 | 51 | 1.534  | S | 0.500 | 0.105  |
| SNF6 | 2006 | 360 | 12 | 50 | 35.464 | S | 0.500 | -2.297 |
| SNE6 | 2006 | 360 | 12 | 50 | 36.997 | S | 0.500 | -2.402 |
| SMM  | 2006 | 360 | 12 | 50 | 54.538 | S | 0.500 | 0.313  |
| SN97 | 2006 | 360 | 12 | 50 | 44.798 | S | 0.500 | -0.019 |
| DJJ  | 2006 | 360 | 12 | 51 | 3.269  | S | 0.500 | 0.681  |
| PHL  | 2006 | 360 | 12 | 50 | 52.124 | S | 0.500 | 0.259  |
| MPM  | 2006 | 360 | 12 | 51 | 0.386  | S | 0.500 | -0.217 |
| SLA  | 2006 | 360 | 12 | 51 | 1.426  | S | 0.500 | -0.221 |
| CMB  | 2006 | 360 | 12 | 50 | 45.044 | S | 0.500 | 0.209  |
| K10A | 2006 | 360 | 12 | 50 | 42.990 | S | 0.500 | 1.541  |
| SNC5 | 2006 | 360 | 12 | 50 | 39.359 | S | 0.500 | -1.290 |
| P09A | 2006 | 360 | 12 | 50 | 50.178 | S | 0.500 | -0.912 |
| SND5 | 2006 | 360 | 12 | 50 | 37.916 | S | 0.500 | -1.685 |
| R06C | 2006 | 360 | 12 | 50 | 47.517 | S | 0.500 | 0.642  |
| SNA8 | 2006 | 360 | 12 | 50 | 44.497 | S | 0.500 | -0.268 |
| HEC  | 2006 | 360 | 12 | 51 | 8.839  | S | 0.500 | 1.239  |
| CWC  | 2006 | 360 | 12 | 50 | 57.882 | S | 0.500 | 0.284  |
| S09A | 2006 | 360 | 12 | 50 | 57.122 | S | 0.500 | 0.795  |
| SHO  | 2006 | 360 | 12 | 51 | 5.551  | S | 0.500 | 1.124  |
| SND8 | 2006 | 360 | 12 | 50 | 39.483 | S | 0.500 | -1.361 |
| R05C | 2006 | 360 | 12 | 50 | 44.230 | S | 0.500 | -0.123 |
| SNB5 | 2006 | 360 | 12 | 50 | 40.783 | S | 0.500 | -1.341 |
| SN43 | 2006 | 360 | 12 | 50 | 50.164 | S | 0.500 | -0.183 |
| BFS  | 2006 | 360 | 12 | 51 | 5.662  | S | 0.500 | 0.552  |
| WCN  | 2006 | 360 | 12 | 50 | 43.288 | S | 0.500 | -0.187 |
| SN84 | 2006 | 360 | 12 | 50 | 45.229 | S | 0.500 | -0.461 |
| GSC  | 2006 | 360 | 12 | 51 | 6.248  | S | 0.500 | 1.564  |
| SN64 | 2006 | 360 | 12 | 50 | 48.491 | S | 0.500 | -0.019 |
| SNA7 | 2006 | 360 | 12 | 50 | 44.006 | S | 0.500 | 0.037  |
| SNA3 | 2006 | 360 | 12 | 50 | 42.585 | S | 0.500 | -0.113 |
| HELL | 2006 | 360 | 12 | 50 | 52.683 | S | 0.500 | -0.855 |

|      |      |     |    |    |          |       |        |
|------|------|-----|----|----|----------|-------|--------|
| SN75 | 2006 | 360 | 12 | 50 | 47.594 S | 0.500 | -0.010 |
| SN85 | 2006 | 360 | 12 | 50 | 46.126 S | 0.500 | 0.099  |
| SN34 | 2006 | 360 | 12 | 50 | 52.206 S | 0.500 | 0.297  |
| RRX  | 2006 | 360 | 12 | 51 | 6.285 S  | 0.500 | 1.222  |
| PLM  | 2006 | 360 | 12 | 51 | 12.610 S | 0.500 | 2.237  |
| SNB3 | 2006 | 360 | 12 | 50 | 40.906 S | 0.500 | -0.380 |
| O06A | 2006 | 360 | 12 | 50 | 39.564 S | 0.500 | -0.927 |
| DEC  | 2006 | 360 | 12 | 51 | 2.894 S  | 0.500 | 0.152  |
| R09A | 2006 | 360 | 12 | 50 | 55.744 S | 0.500 | 0.505  |
| SN95 | 2006 | 360 | 12 | 50 | 44.201 S | 0.500 | -0.478 |
| S08C | 2006 | 360 | 12 | 50 | 55.855 S | 0.500 | 1.533  |
| SNB9 | 2006 | 360 | 12 | 50 | 43.535 S | 0.500 | -0.238 |
| SNC7 | 2006 | 360 | 12 | 50 | 40.259 S | 0.500 | -1.285 |
| R04C | 2006 | 360 | 12 | 50 | 41.896 S | 0.500 | -0.171 |
| SN96 | 2006 | 360 | 12 | 50 | 45.172 S | 0.500 | -0.141 |
| SNC6 | 2006 | 360 | 12 | 50 | 40.582 S | 0.500 | -1.385 |
| MWC  | 2006 | 360 | 12 | 51 | 4.021 S  | 0.500 | -0.051 |
| S06C | 2006 | 360 | 12 | 50 | 47.028 S | 0.500 | -0.394 |
| MUR  | 2006 | 360 | 12 | 51 | 9.858 S  | 0.500 | 1.719  |
| EDW2 | 2006 | 360 | 12 | 51 | 3.444 S  | 0.500 | 1.586  |
| CIA  | 2006 | 360 | 12 | 51 | 5.542 S  | 0.500 | 0.505  |
| SN93 | 2006 | 360 | 12 | 50 | 43.767 S | 0.500 | 0.191  |
| JCS  | 2006 | 360 | 12 | 51 | 14.407 S | 0.500 | 2.613  |
| LRL  | 2006 | 360 | 12 | 51 | 2.211 S  | 0.500 | 0.814  |
| SN14 | 2006 | 360 | 12 | 50 | 54.035 S | 0.500 | 0.549  |
| LGU  | 2006 | 360 | 12 | 51 | 0.664 S  | 0.500 | -0.251 |
| LAVA | 2006 | 360 | 12 | 50 | 40.622 S | 0.500 | -1.059 |
| T06C | 2006 | 360 | 12 | 50 | 49.774 S | 0.500 | -0.452 |
| S05C | 2006 | 360 | 12 | 50 | 46.469 S | 0.500 | -0.590 |
| DGR  | 2006 | 360 | 12 | 51 | 9.957 S  | 0.500 | 1.373  |

|      |      |    |    |         |          |            |         |
|------|------|----|----|---------|----------|------------|---------|
| 2007 | 15   | 21 | 19 | 50.6173 | -4.60900 | -105.14500 | 10.0000 |
| R05C | 2007 | 15 | 21 | 34      | 49.968 S | 0.500      | 0.358   |
| K07A | 2007 | 15 | 21 | 35      | 40.795 S | 0.500      | 1.219   |
| SN34 | 2007 | 15 | 21 | 34      | 25.031 S | 0.500      | -2.452  |
| SN98 | 2007 | 15 | 21 | 34      | 49.809 S | 0.500      | 0.161   |
| HEC  | 2007 | 15 | 21 | 33      | 40.478 S | 0.500      | -0.716  |
| SNE6 | 2007 | 15 | 21 | 35      | 1.946 S  | 0.500      | -0.720  |
| U04C | 2007 | 15 | 21 | 34      | 20.663 S | 0.500      | 0.070   |
| S08C | 2007 | 15 | 21 | 34      | 24.912 S | 0.500      | -0.717  |
| SN75 | 2007 | 15 | 21 | 34      | 39.122 S | 0.500      | -1.023  |
| SNC5 | 2007 | 15 | 21 | 34      | 57.212 S | 0.500      | 0.920   |
| N07B | 2007 | 15 | 21 | 35      | 13.585 S | 0.500      | 0.776   |
| SND9 | 2007 | 15 | 21 | 35      | 4.294 S  | 0.500      | 0.274   |
| LRL  | 2007 | 15 | 21 | 33      | 53.317 S | 0.500      | -1.980  |
| SN96 | 2007 | 15 | 21 | 34      | 46.166 S | 0.500      | 0.038   |
| SNB7 | 2007 | 15 | 21 | 34      | 54.878 S | 0.500      | 0.498   |
| SNE4 | 2007 | 15 | 21 | 35      | 1.886 S  | 0.500      | 0.471   |
| FUR  | 2007 | 15 | 21 | 34      | 6.108 S  | 0.500      | 0.320   |
| SND5 | 2007 | 15 | 21 | 34      | 59.572 S | 0.500      | 0.536   |
| N10A | 2007 | 15 | 21 | 35      | 4.103 S  | 0.500      | -0.050  |
| SND4 | 2007 | 15 | 21 | 34      | 58.694 S | 0.500      | 0.767   |
| SN85 | 2007 | 15 | 21 | 34      | 41.958 S | 0.500      | -1.368  |
| J06A | 2007 | 15 | 21 | 35      | 50.132 S | 0.500      | 0.346   |
| ISA  | 2007 | 15 | 21 | 33      | 59.694 S | 0.500      | -1.423  |
| CMB  | 2007 | 15 | 21 | 34      | 40.666 S | 0.500      | -0.876  |
| SNG7 | 2007 | 15 | 21 | 35      | 11.209 S | 0.500      | -1.187  |
| SNE9 | 2007 | 15 | 21 | 35      | 7.100 S  | 0.500      | -0.260  |
| WCN  | 2007 | 15 | 21 | 34      | 57.343 S | 0.500      | 1.135   |
| L07A | 2007 | 15 | 21 | 35      | 32.941 S | 0.500      | 2.192   |
| SNG5 | 2007 | 15 | 21 | 35      | 8.332 S  | 0.500      | -0.444  |
| S04C | 2007 | 15 | 21 | 34      | 37.954 S | 0.500      | -0.315  |
| MOD  | 2007 | 15 | 21 | 35      | 32.760 S | 0.500      | 0.178   |

31 10.557

|      |      |    |    |    |        |   |       |        |
|------|------|----|----|----|--------|---|-------|--------|
| SNC7 | 2007 | 15 | 21 | 34 | 59.346 | S | 0.500 | 0.295  |
| MPM  | 2007 | 15 | 21 | 34 | 3.666  | S | 0.500 | 0.743  |
| SNF9 | 2007 | 15 | 21 | 35 | 10.299 | S | 0.500 | -0.102 |
| SNC6 | 2007 | 15 | 21 | 34 | 56.490 | S | 0.500 | 0.365  |
| ORV  | 2007 | 15 | 21 | 35 | 7.449  | S | 0.500 | 1.334  |
| LAVA | 2007 | 15 | 21 | 34 | 52.765 | S | 0.500 | 0.214  |
| CWC  | 2007 | 15 | 21 | 34 | 11.851 | S | 0.500 | 1.566  |
| SN93 | 2007 | 15 | 21 | 34 | 43.228 | S | 0.500 | -0.546 |
| SNA3 | 2007 | 15 | 21 | 34 | 47.600 | S | 0.500 | 0.064  |
| SNB3 | 2007 | 15 | 21 | 34 | 51.055 | S | 0.500 | 0.265  |
| SNA4 | 2007 | 15 | 21 | 34 | 47.915 | S | 0.500 | -0.572 |
| SNB5 | 2007 | 15 | 21 | 34 | 53.358 | S | 0.500 | 0.293  |
| SNE7 | 2007 | 15 | 21 | 35 | 6.044  | S | 0.500 | -0.646 |

|      |      |    |    |         |         |           |        |        |        |
|------|------|----|----|---------|---------|-----------|--------|--------|--------|
| 2007 | 77   | 2  | 11 | 23.5487 | 4.58500 | -78.49400 | 7.0000 | 33     | 18.249 |
| S06C | 2007 | 77 | 2  | 27      | 32.959  | S         | 0.500  | 0.074  |        |
| BDM  | 2007 | 77 | 2  | 27      | 53.536  | S         | 0.500  | 1.321  |        |
| U11A | 2007 | 77 | 2  | 26      | 39.196  | S         | 0.500  | 0.032  |        |
| O07A | 2007 | 77 | 2  | 27      | 37.930  | S         | 0.500  | -2.715 |        |
| HATC | 2007 | 77 | 2  | 28      | 6.132   | S         | 0.500  | -2.277 |        |
| SNC5 | 2007 | 77 | 2  | 27      | 49.572  | S         | 0.500  | 0.154  |        |
| HOPS | 2007 | 77 | 2  | 28      | 11.676  | S         | 0.500  | 1.324  |        |
| CWC  | 2007 | 77 | 2  | 27      | 6.829   | S         | 0.500  | 1.375  |        |
| MCCM | 2007 | 77 | 2  | 28      | 2.420   | S         | 0.500  | -0.667 |        |
| SND4 | 2007 | 77 | 2  | 27      | 52.523  | S         | 0.500  | -0.559 |        |
| PKD  | 2007 | 77 | 2  | 27      | 25.032  | S         | 0.500  | -0.855 |        |
| R11A | 2007 | 77 | 2  | 26      | 56.629  | S         | 0.500  | -0.267 |        |
| RCT  | 2007 | 77 | 2  | 27      | 14.216  | S         | 0.500  | -1.296 |        |
| SNE5 | 2007 | 77 | 2  | 27      | 54.142  | S         | 0.500  | -1.414 |        |
| O08A | 2007 | 77 | 2  | 27      | 32.527  | S         | 0.500  | -3.039 |        |
| FARB | 2007 | 77 | 2  | 28      | 0.777   | S         | 0.500  | -0.650 |        |
| MOD  | 2007 | 77 | 2  | 28      | 3.856   | S         | 0.500  | -2.386 |        |
| WENL | 2007 | 77 | 2  | 27      | 50.073  | S         | 0.500  | 1.198  |        |
| JRSC | 2007 | 77 | 2  | 27      | 52.293  | S         | 0.500  | 0.223  |        |
| LAVA | 2007 | 77 | 2  | 27      | 47.461  | S         | 0.500  | 0.240  |        |
| L04A | 2007 | 77 | 2  | 28      | 19.926  | S         | 0.500  | -2.001 |        |
| SND5 | 2007 | 77 | 2  | 27      | 51.586  | S         | 0.500  | -0.472 |        |
| PACP | 2007 | 77 | 2  | 27      | 40.169  | S         | 0.500  | -0.322 |        |
| VTV  | 2007 | 77 | 2  | 26      | 43.967  | S         | 0.500  | -0.117 |        |
| Q09A | 2007 | 77 | 2  | 27      | 14.609  | S         | 0.500  | -0.708 |        |
| BAK  | 2007 | 77 | 2  | 27      | 9.034   | S         | 0.500  | 1.626  |        |
| MNRC | 2007 | 77 | 2  | 28      | 5.315   | S         | 0.500  | 1.503  |        |
| SHO  | 2007 | 77 | 2  | 26      | 44.614  | S         | 0.500  | 1.190  |        |
| S10A | 2007 | 77 | 2  | 27      | 2.750   | S         | 0.500  | 0.121  |        |
| ELFS | 2007 | 77 | 2  | 27      | 58.339  | S         | 0.500  | -2.299 |        |
| S11A | 2007 | 77 | 2  | 26      | 53.125  | S         | 0.500  | 0.649  |        |
| GRA  | 2007 | 77 | 2  | 27      | 3.427   | S         | 0.500  | 0.834  |        |
| ADO  | 2007 | 77 | 2  | 26      | 44.946  | S         | 0.500  | -0.058 |        |
| RPV  | 2007 | 77 | 2  | 26      | 50.552  | S         | 0.500  | 1.459  |        |
| P01C | 2007 | 77 | 2  | 28      | 15.250  | S         | 0.500  | -0.929 |        |
| P10A | 2007 | 77 | 2  | 27      | 13.642  | S         | 0.500  | -1.428 |        |
| SNCC | 2007 | 77 | 2  | 26      | 58.761  | S         | 0.500  | 1.360  |        |
| SDD  | 2007 | 77 | 2  | 26      | 41.871  | S         | 0.500  | 1.778  |        |
| HAST | 2007 | 77 | 2  | 27      | 37.818  | S         | 0.500  | -1.085 |        |
| SNF9 | 2007 | 77 | 2  | 27      | 52.314  | S         | 0.500  | -2.167 |        |
| ORV  | 2007 | 77 | 2  | 27      | 58.521  | S         | 0.500  | -1.023 |        |
| SNG7 | 2007 | 77 | 2  | 27      | 59.025  | S         | 0.500  | -1.796 |        |
| SNG5 | 2007 | 77 | 2  | 27      | 59.314  | S         | 0.500  | -1.876 |        |
| SN75 | 2007 | 77 | 2  | 27      | 34.559  | S         | 0.500  | 1.014  |        |
| SNA4 | 2007 | 77 | 2  | 27      | 43.816  | S         | 0.500  | 0.217  |        |
| SNB7 | 2007 | 77 | 2  | 27      | 44.998  | S         | 0.500  | 0.711  |        |
| MLAC | 2007 | 77 | 2  | 27      | 23.326  | S         | 0.500  | 1.768  |        |
| SNF8 | 2007 | 77 | 2  | 27      | 54.009  | S         | 0.500  | -1.617 |        |

|      |      |    |   |    |        |   |       |        |
|------|------|----|---|----|--------|---|-------|--------|
| SNE6 | 2007 | 77 | 2 | 27 | 52.276 | S | 0.500 | -1.207 |
| SVD  | 2007 | 77 | 2 | 26 | 39.983 | S | 0.500 | 1.722  |
| O09A | 2007 | 77 | 2 | 27 | 23.928 | S | 0.500 | -1.997 |
| EDW2 | 2007 | 77 | 2 | 26 | 52.298 | S | 0.500 | -0.838 |
| O01C | 2007 | 77 | 2 | 28 | 23.338 | S | 0.500 | -1.525 |
| R09A | 2007 | 77 | 2 | 27 | 9.605  | S | 0.500 | -0.014 |
| SUTB | 2007 | 77 | 2 | 27 | 59.926 | S | 0.500 | -0.160 |
| CMB  | 2007 | 77 | 2 | 27 | 38.714 | S | 0.500 | -0.170 |
| Q10A | 2007 | 77 | 2 | 27 | 7.731  | S | 0.500 | -0.393 |
| SNB6 | 2007 | 77 | 2 | 27 | 45.050 | S | 0.500 | 0.999  |
| SNE4 | 2007 | 77 | 2 | 27 | 55.293 | S | 0.500 | -0.787 |
| BBR  | 2007 | 77 | 2 | 26 | 39.126 | S | 0.500 | 1.208  |
| SN97 | 2007 | 77 | 2 | 27 | 40.578 | S | 0.500 | 1.270  |
| FMP  | 2007 | 77 | 2 | 26 | 49.645 | S | 0.500 | 1.865  |
| SN63 | 2007 | 77 | 2 | 27 | 31.620 | S | 0.500 | 0.147  |
| SNF6 | 2007 | 77 | 2 | 27 | 55.753 | S | 0.500 | -1.498 |
| MPP  | 2007 | 77 | 2 | 27 | 11.264 | S | 0.500 | -0.525 |
| SNC8 | 2007 | 77 | 2 | 27 | 46.276 | S | 0.500 | -0.135 |
| DJJ  | 2007 | 77 | 2 | 26 | 53.312 | S | 0.500 | 1.097  |
| CIA  | 2007 | 77 | 2 | 26 | 48.044 | S | 0.500 | 1.129  |
| SND9 | 2007 | 77 | 2 | 27 | 46.890 | S | 0.500 | -1.581 |
| SN87 | 2007 | 77 | 2 | 27 | 37.954 | S | 0.500 | 1.123  |
| SNC6 | 2007 | 77 | 2 | 27 | 47.767 | S | 0.500 | 0.448  |
| PASC | 2007 | 77 | 2 | 26 | 50.807 | S | 0.500 | 0.850  |
| SN34 | 2007 | 77 | 2 | 27 | 22.412 | S | 0.500 | 0.450  |
| FUR  | 2007 | 77 | 2 | 26 | 54.646 | S | 0.500 | 1.145  |
| SN74 | 2007 | 77 | 2 | 27 | 34.935 | S | 0.500 | 0.546  |
| SN93 | 2007 | 77 | 2 | 27 | 41.698 | S | 0.500 | 0.043  |
| HELL | 2007 | 77 | 2 | 27 | 15.760 | S | 0.500 | -0.456 |
| ARV  | 2007 | 77 | 2 | 27 | 2.854  | S | 0.500 | -0.221 |
| N08A | 2007 | 77 | 2 | 27 | 36.261 | S | 0.500 | -2.729 |
| SCZ2 | 2007 | 77 | 2 | 27 | 3.802  | S | 0.500 | 0.131  |
| SND7 | 2007 | 77 | 2 | 27 | 51.527 | S | 0.500 | -0.647 |
| P09A | 2007 | 77 | 2 | 27 | 18.859 | S | 0.500 | -1.668 |
| SN55 | 2007 | 77 | 2 | 27 | 29.284 | S | 0.500 | 0.974  |
| DEC  | 2007 | 77 | 2 | 26 | 52.157 | S | 0.500 | 0.169  |
| WCN  | 2007 | 77 | 2 | 27 | 42.479 | S | 0.500 | 0.133  |
| SNA7 | 2007 | 77 | 2 | 27 | 42.850 | S | 0.500 | 1.214  |
| SND8 | 2007 | 77 | 2 | 27 | 48.438 | S | 0.500 | -0.601 |
| TIN  | 2007 | 77 | 2 | 27 | 12.295 | S | 0.500 | 1.039  |
| SN84 | 2007 | 77 | 2 | 27 | 37.975 | S | 0.500 | 0.268  |
| HEC  | 2007 | 77 | 2 | 26 | 36.795 | S | 0.500 | 0.826  |
| OSI  | 2007 | 77 | 2 | 26 | 58.518 | S | 0.500 | -0.058 |
| LGU  | 2007 | 77 | 2 | 26 | 59.101 | S | 0.500 | 0.608  |
| SNB9 | 2007 | 77 | 2 | 27 | 41.073 | S | 0.500 | -0.320 |
| SN95 | 2007 | 77 | 2 | 27 | 40.331 | S | 0.500 | 0.290  |
| MPM  | 2007 | 77 | 2 | 26 | 58.633 | S | 0.500 | 1.726  |
| BEK  | 2007 | 77 | 2 | 27 | 50.782 | S | 0.500 | -1.046 |
| SN98 | 2007 | 77 | 2 | 27 | 37.055 | S | 0.500 | 0.640  |
| SNE9 | 2007 | 77 | 2 | 27 | 49.750 | S | 0.500 | -1.818 |
| SN64 | 2007 | 77 | 2 | 27 | 31.588 | S | 0.500 | 0.545  |
| SMM  | 2007 | 77 | 2 | 27 | 16.951 | S | 0.500 | 0.686  |
| SN85 | 2007 | 77 | 2 | 27 | 37.461 | S | 0.500 | 0.557  |
| BFS  | 2007 | 77 | 2 | 26 | 45.809 | S | 0.500 | 0.605  |
| RRX  | 2007 | 77 | 2 | 26 | 43.654 | S | 0.500 | 0.708  |
| CHF  | 2007 | 77 | 2 | 26 | 49.733 | S | 0.500 | 0.112  |
| GSC  | 2007 | 77 | 2 | 26 | 45.765 | S | 0.500 | 1.433  |
| SNA3 | 2007 | 77 | 2 | 27 | 44.294 | S | 0.500 | 0.004  |
| SNC7 | 2007 | 77 | 2 | 27 | 48.483 | S | 0.500 | 0.179  |
| SNB3 | 2007 | 77 | 2 | 27 | 48.336 | S | 0.500 | 0.234  |
| MWC  | 2007 | 77 | 2 | 26 | 49.580 | S | 0.500 | 0.392  |
| PHL  | 2007 | 77 | 2 | 27 | 22.949 | S | 0.500 | 0.566  |
| SNA8 | 2007 | 77 | 2 | 27 | 39.721 | S | 0.500 | 0.257  |



|      |      |    |   |    |          |       |       |
|------|------|----|---|----|----------|-------|-------|
| SN96 | 2007 | 77 | 2 | 27 | 39.991 S | 0.500 | 0.866 |
| S08C | 2007 | 77 | 2 | 27 | 15.975 S | 0.500 | 1.404 |
| ISA  | 2007 | 77 | 2 | 27 | 5.288 S  | 0.500 | 1.708 |
| LRL  | 2007 | 77 | 2 | 26 | 55.565 S | 0.500 | 1.140 |
| SN14 | 2007 | 77 | 2 | 27 | 18.471 S | 0.500 | 0.790 |

|      |      |     |    |        |           |           |          |    |       |
|------|------|-----|----|--------|-----------|-----------|----------|----|-------|
| 2007 | 202  | 15  | 35 | 1.6114 | -22.15100 | -65.77700 | 289.5000 | 38 | 9.011 |
| WDC  | 2007 | 202 | 15 | 56     | 30.899 S  | 0.500     | -5.360   |    |       |

|      |      |    |    |        |          |           |         |    |        |
|------|------|----|----|--------|----------|-----------|---------|----|--------|
| 2007 | 21   | 11 | 28 | 3.0192 | 1.06500  | 126.28200 | 22.0000 | 43 | 17.959 |
| K07A | 2007 | 21 | 11 | 52     | 56.065 S | 0.500     | -0.012  |    |        |
| CWC  | 2007 | 21 | 11 | 53     | 8.216 S  | 0.500     | 0.357   |    |        |
| VTV  | 2007 | 21 | 11 | 53     | 12.697 S | 0.500     | 0.658   |    |        |
| L09A | 2007 | 21 | 11 | 53     | 1.901 S  | 0.500     | 0.082   |    |        |
| OSI  | 2007 | 21 | 11 | 53     | 7.751 S  | 0.500     | 0.122   |    |        |
| JCS  | 2007 | 21 | 11 | 53     | 19.357 S | 0.500     | 3.029   |    |        |
| BBR  | 2007 | 21 | 11 | 53     | 16.057 S | 0.500     | 1.758   |    |        |
| TOV  | 2007 | 21 | 11 | 53     | 6.994 S  | 0.500     | -0.595  |    |        |
| Q08A | 2007 | 21 | 11 | 53     | 5.638 S  | 0.500     | 0.274   |    |        |
| MNRC | 2007 | 21 | 11 | 52     | 49.427 S | 0.500     | -1.089  |    |        |
| RPV  | 2007 | 21 | 11 | 53     | 9.478 S  | 0.500     | 0.003   |    |        |
| CIA  | 2007 | 21 | 11 | 53     | 10.019 S | 0.500     | 0.051   |    |        |
| EDW2 | 2007 | 21 | 11 | 53     | 11.130 S | 0.500     | 1.694   |    |        |
| S09A | 2007 | 21 | 11 | 53     | 10.134 S | 0.500     | 1.274   |    |        |
| SHO  | 2007 | 21 | 11 | 53     | 16.627 S | 0.500     | 2.808   |    |        |
| M03C | 2007 | 21 | 11 | 52     | 47.466 S | 0.500     | -1.346  |    |        |
| I04A | 2007 | 21 | 11 | 52     | 42.717 S | 0.500     | -2.457  |    |        |
| K09A | 2007 | 21 | 11 | 53     | 1.282 S  | 0.500     | 0.538   |    |        |
| O07A | 2007 | 21 | 11 | 52     | 59.975 S | 0.500     | -0.563  |    |        |
| PLM  | 2007 | 21 | 11 | 53     | 17.242 S | 0.500     | 1.975   |    |        |
| M06C | 2007 | 21 | 11 | 52     | 53.724 S | 0.500     | -0.476  |    |        |
| DJJ  | 2007 | 21 | 11 | 53     | 8.905 S  | 0.500     | 0.191   |    |        |
| N08A | 2007 | 21 | 11 | 53     | 1.963 S  | 0.500     | -0.103  |    |        |
| SLA  | 2007 | 21 | 11 | 53     | 11.717 S | 0.500     | 0.774   |    |        |
| R08A | 2007 | 21 | 11 | 53     | 6.939 S  | 0.500     | 1.811   |    |        |
| N09A | 2007 | 21 | 11 | 53     | 3.873 S  | 0.500     | 0.120   |    |        |
| HELL | 2007 | 21 | 11 | 53     | 3.894 S  | 0.500     | -0.383  |    |        |
| SN14 | 2007 | 21 | 11 | 53     | 6.001 S  | 0.500     | 1.018   |    |        |
| L02A | 2007 | 21 | 11 | 52     | 42.844 S | 0.500     | -0.617  |    |        |
| SNE7 | 2007 | 21 | 11 | 52     | 53.591 S | 0.500     | -1.485  |    |        |
| SMM  | 2007 | 21 | 11 | 53     | 3.101 S  | 0.500     | 0.597   |    |        |
| J03A | 2007 | 21 | 11 | 52     | 43.125 S | 0.500     | -0.689  |    |        |
| DEC  | 2007 | 21 | 11 | 53     | 9.038 S  | 0.500     | -0.087  |    |        |
| SN34 | 2007 | 21 | 11 | 53     | 4.671 S  | 0.500     | 0.824   |    |        |
| SNF6 | 2007 | 21 | 11 | 52     | 52.214 S | 0.500     | -1.835  |    |        |
| MWC  | 2007 | 21 | 11 | 53     | 10.374 S | 0.500     | -0.104  |    |        |
| I08A | 2007 | 21 | 11 | 52     | 56.581 S | 0.500     | 0.009   |    |        |
| GASB | 2007 | 21 | 11 | 52     | 48.740 S | 0.500     | -0.005  |    |        |
| U04C | 2007 | 21 | 11 | 52     | 57.854 S | 0.500     | -0.808  |    |        |
| SUTB | 2007 | 21 | 11 | 52     | 50.066 S | 0.500     | -1.980  |    |        |
| PHL  | 2007 | 21 | 11 | 53     | 0.504 S  | 0.500     | 0.175   |    |        |
| RSS  | 2007 | 21 | 11 | 53     | 12.236 S | 0.500     | -0.321  |    |        |
| HAST | 2007 | 21 | 11 | 52     | 55.134 S | 0.500     | -0.863  |    |        |
| R07C | 2007 | 21 | 11 | 53     | 4.779 S  | 0.500     | 1.796   |    |        |
| O04C | 2007 | 21 | 11 | 52     | 51.766 S | 0.500     | -1.540  |    |        |
| LGU  | 2007 | 21 | 11 | 53     | 5.983 S  | 0.500     | -1.036  |    |        |
| SN85 | 2007 | 21 | 11 | 53     | 0.569 S  | 0.500     | 0.975   |    |        |
| Q04C | 2007 | 21 | 11 | 52     | 53.118 S | 0.500     | -0.504  |    |        |
| Q07A | 2007 | 21 | 11 | 53     | 2.941 S  | 0.500     | 0.821   |    |        |
| K10A | 2007 | 21 | 11 | 53     | 3.941 S  | 0.500     | 0.875   |    |        |
| SN87 | 2007 | 21 | 11 | 53     | 1.149 S  | 0.500     | 0.786   |    |        |
| BFS  | 2007 | 21 | 11 | 53     | 12.307 S | 0.500     | 0.795   |    |        |
| SAO  | 2007 | 21 | 11 | 52     | 55.332 S | 0.500     | -0.603  |    |        |

|      |      |    |    |    |          |       |        |
|------|------|----|----|----|----------|-------|--------|
| M07A | 2007 | 21 | 11 | 52 | 58.073 S | 0.500 | 0.032  |
| SNG7 | 2007 | 21 | 11 | 52 | 50.940 S | 0.500 | -2.645 |
| WVOR | 2007 | 21 | 11 | 52 | 58.365 S | 0.500 | 0.213  |
| MPM  | 2007 | 21 | 11 | 53 | 11.261 S | 0.500 | 1.133  |
| FMP  | 2007 | 21 | 11 | 53 | 10.325 S | 0.500 | 0.698  |
| MUR  | 2007 | 21 | 11 | 53 | 15.437 S | 0.500 | 1.927  |
| GSC  | 2007 | 21 | 11 | 53 | 15.540 S | 0.500 | 2.535  |
| LRL  | 2007 | 21 | 11 | 53 | 11.586 S | 0.500 | 1.608  |
| L07A | 2007 | 21 | 11 | 52 | 56.975 S | 0.500 | 0.045  |
| M02C | 2007 | 21 | 11 | 52 | 45.839 S | 0.500 | -0.893 |
| SN63 | 2007 | 21 | 11 | 53 | 0.717 S  | 0.500 | -0.021 |
| P01C | 2007 | 21 | 11 | 52 | 45.608 S | 0.500 | -1.625 |
| K08A | 2007 | 21 | 11 | 52 | 59.063 S | 0.500 | 0.788  |
| L08A | 2007 | 21 | 11 | 52 | 59.829 S | 0.500 | 0.394  |
| SNA7 | 2007 | 21 | 11 | 52 | 59.192 S | 0.500 | 0.269  |
| SND8 | 2007 | 21 | 11 | 52 | 55.752 S | 0.500 | -1.170 |
| SNE9 | 2007 | 21 | 11 | 52 | 55.761 S | 0.500 | -1.058 |
| SNG5 | 2007 | 21 | 11 | 52 | 50.598 S | 0.500 | -1.664 |
| SN84 | 2007 | 21 | 11 | 52 | 59.299 S | 0.500 | 0.248  |
| J08A | 2007 | 21 | 11 | 52 | 58.134 S | 0.500 | 0.674  |
| DGR  | 2007 | 21 | 11 | 53 | 15.932 S | 0.500 | 1.871  |
| SNA8 | 2007 | 21 | 11 | 53 | 0.173 S  | 0.500 | 0.408  |
| SN98 | 2007 | 21 | 11 | 53 | 0.984 S  | 0.500 | 0.667  |
| SN75 | 2007 | 21 | 11 | 53 | 1.942 S  | 0.500 | 1.004  |
| SNE5 | 2007 | 21 | 11 | 52 | 51.985 S | 0.500 | -2.184 |
| SN43 | 2007 | 21 | 11 | 53 | 2.830 S  | 0.500 | 0.517  |
| SNC8 | 2007 | 21 | 11 | 52 | 57.308 S | 0.500 | -0.877 |
| YBH  | 2007 | 21 | 11 | 52 | 45.458 S | 0.500 | -1.345 |
| WCN  | 2007 | 21 | 11 | 52 | 58.909 S | 0.500 | 0.029  |
| SNE6 | 2007 | 21 | 11 | 52 | 53.304 S | 0.500 | -1.948 |
| SN64 | 2007 | 21 | 11 | 53 | 2.017 S  | 0.500 | 0.717  |
| WDC  | 2007 | 21 | 11 | 52 | 46.812 S | 0.500 | -1.041 |
| SNF8 | 2007 | 21 | 11 | 52 | 53.774 S | 0.500 | -1.589 |
| SNB9 | 2007 | 21 | 11 | 52 | 59.683 S | 0.500 | 0.354  |
| SNC3 | 2007 | 21 | 11 | 52 | 54.071 S | 0.500 | -0.287 |
| SN97 | 2007 | 21 | 11 | 52 | 59.770 S | 0.500 | 0.401  |
| R06C | 2007 | 21 | 11 | 53 | 2.257 S  | 0.500 | 1.414  |
| SN96 | 2007 | 21 | 11 | 52 | 59.709 S | 0.500 | 0.442  |
| CMB  | 2007 | 21 | 11 | 52 | 58.509 S | 0.500 | 0.517  |
| R04C | 2007 | 21 | 11 | 52 | 55.794 S | 0.500 | 0.035  |
| SN95 | 2007 | 21 | 11 | 52 | 58.195 S | 0.500 | -0.222 |
| SNC5 | 2007 | 21 | 11 | 52 | 54.641 S | 0.500 | -1.104 |
| SNA4 | 2007 | 21 | 11 | 52 | 57.275 S | 0.500 | 0.182  |
| SND4 | 2007 | 21 | 11 | 52 | 53.718 S | 0.500 | -0.678 |
| SNB3 | 2007 | 21 | 11 | 52 | 55.710 S | 0.500 | 0.215  |
| SNC7 | 2007 | 21 | 11 | 52 | 56.383 S | 0.500 | -0.636 |
| SNE4 | 2007 | 21 | 11 | 52 | 52.355 S | 0.500 | -0.898 |
| SN93 | 2007 | 21 | 11 | 52 | 57.306 S | 0.500 | 0.260  |
| SNF9 | 2007 | 21 | 11 | 52 | 54.499 S | 0.500 | -1.102 |
| R05C | 2007 | 21 | 11 | 52 | 59.129 S | 0.500 | 0.410  |
| BEK  | 2007 | 21 | 11 | 52 | 54.555 S | 0.500 | -1.940 |
| SNA3 | 2007 | 21 | 11 | 52 | 57.095 S | 0.500 | 0.590  |
| SNC6 | 2007 | 21 | 11 | 52 | 56.153 S | 0.500 | -0.882 |
| SND5 | 2007 | 21 | 11 | 52 | 53.464 S | 0.500 | -1.476 |

|      |      |    |   |         |          |           |         |  |  |
|------|------|----|---|---------|----------|-----------|---------|--|--|
| 2007 | 51   | 8  | 4 | 42.8174 | -1.03400 | 126.97600 | 12.0000 |  |  |
| SNB5 | 2007 | 51 | 8 | 29      | 43.067 S | 0.500     | 0.086   |  |  |
| SBC  | 2007 | 51 | 8 | 29      | 49.561 S | 0.500     | -0.294  |  |  |
| I03A | 2007 | 51 | 8 | 29      | 28.365 S | 0.500     | -0.959  |  |  |
| MOD  | 2007 | 51 | 8 | 29      | 42.530 S | 0.500     | 1.803   |  |  |
| VTV  | 2007 | 51 | 8 | 29      | 57.111 S | 0.500     | -0.413  |  |  |
| SHO  | 2007 | 51 | 8 | 30      | 2.107 S  | 0.500     | 2.594   |  |  |
| GASB | 2007 | 51 | 8 | 29      | 33.940 S | 0.500     | -1.214  |  |  |

|      |      |    |   |    |        |   |       |        |
|------|------|----|---|----|--------|---|-------|--------|
| Q07A | 2007 | 51 | 8 | 29 | 50.053 | S | 0.500 | 1.699  |
| PKD  | 2007 | 51 | 8 | 29 | 44.749 | S | 0.500 | -0.875 |
| S08C | 2007 | 51 | 8 | 29 | 55.001 | S | 0.500 | 2.529  |
| BBR  | 2007 | 51 | 8 | 30 | 0.120  | S | 0.500 | 0.406  |
| V05C | 2007 | 51 | 8 | 29 | 48.697 | S | 0.500 | 1.076  |
| TIN  | 2007 | 51 | 8 | 29 | 53.983 | S | 0.500 | 1.544  |
| I04A | 2007 | 51 | 8 | 29 | 30.284 | S | 0.500 | -1.467 |
| LRL  | 2007 | 51 | 8 | 29 | 57.105 | S | 0.500 | 1.470  |
| HOPS | 2007 | 51 | 8 | 29 | 32.070 | S | 0.500 | -2.305 |
| Q08A | 2007 | 51 | 8 | 29 | 52.875 | S | 0.500 | 1.315  |
| HATC | 2007 | 51 | 8 | 29 | 36.833 | S | 0.500 | -1.207 |
| U04C | 2007 | 51 | 8 | 29 | 44.402 | S | 0.500 | -0.095 |
| HELL | 2007 | 51 | 8 | 29 | 49.976 | S | 0.500 | -0.158 |
| L05A | 2007 | 51 | 8 | 29 | 38.065 | S | 0.500 | -0.945 |
| HUMO | 2007 | 51 | 8 | 29 | 31.142 | S | 0.500 | -0.213 |
| HAST | 2007 | 51 | 8 | 29 | 41.446 | S | 0.500 | -0.373 |
| M08A | 2007 | 51 | 8 | 29 | 47.655 | S | 0.500 | 0.520  |
| SN34 | 2007 | 51 | 8 | 29 | 50.974 | S | 0.500 | 1.170  |
| SNF8 | 2007 | 51 | 8 | 29 | 40.346 | S | 0.500 | -1.470 |
| CVS  | 2007 | 51 | 8 | 29 | 34.535 | S | 0.500 | -2.517 |
| DGR  | 2007 | 51 | 8 | 30 | 0.694  | S | 0.500 | 1.303  |
| J05A | 2007 | 51 | 8 | 29 | 35.053 | S | 0.500 | -1.085 |
| TOV  | 2007 | 51 | 8 | 29 | 52.749 | S | 0.500 | -0.254 |
| P01C | 2007 | 51 | 8 | 29 | 31.939 | S | 0.500 | -0.940 |
| SMM  | 2007 | 51 | 8 | 29 | 48.761 | S | 0.500 | 0.633  |
| Q03C | 2007 | 51 | 8 | 29 | 38.696 | S | 0.500 | 0.682  |
| SNF6 | 2007 | 51 | 8 | 29 | 38.288 | S | 0.500 | -2.162 |
| WDC  | 2007 | 51 | 8 | 29 | 33.020 | S | 0.500 | -1.412 |
| SNE9 | 2007 | 51 | 8 | 29 | 41.978 | S | 0.500 | -1.273 |
| YBH  | 2007 | 51 | 8 | 29 | 32.522 | S | 0.500 | -0.423 |
| SN95 | 2007 | 51 | 8 | 29 | 44.823 | S | 0.500 | 0.262  |
| BFS  | 2007 | 51 | 8 | 29 | 57.620 | S | 0.500 | 0.673  |
| SNA8 | 2007 | 51 | 8 | 29 | 46.972 | S | 0.500 | 0.952  |
| SN55 | 2007 | 51 | 8 | 29 | 51.054 | S | 0.500 | 2.724  |
| SN14 | 2007 | 51 | 8 | 29 | 52.158 | S | 0.500 | 1.261  |
| SNF9 | 2007 | 51 | 8 | 29 | 40.846 | S | 0.500 | -1.218 |
| SN98 | 2007 | 51 | 8 | 29 | 47.900 | S | 0.500 | 1.353  |
| K02A | 2007 | 51 | 8 | 29 | 29.614 | S | 0.500 | -0.318 |
| SNB7 | 2007 | 51 | 8 | 29 | 44.403 | S | 0.500 | 0.046  |
| SND9 | 2007 | 51 | 8 | 29 | 43.355 | S | 0.500 | -0.573 |
| R06C | 2007 | 51 | 8 | 29 | 48.757 | S | 0.500 | 1.760  |
| BEK  | 2007 | 51 | 8 | 29 | 40.798 | S | 0.500 | -2.099 |
| I06A | 2007 | 51 | 8 | 29 | 38.492 | S | 0.500 | -0.067 |
| J06A | 2007 | 51 | 8 | 29 | 38.819 | S | 0.500 | -0.840 |
| SUTB | 2007 | 51 | 8 | 29 | 36.324 | S | 0.500 | -2.047 |
| SN97 | 2007 | 51 | 8 | 29 | 46.074 | S | 0.500 | 0.490  |
| SND8 | 2007 | 51 | 8 | 29 | 42.256 | S | 0.500 | -1.023 |
| S04C | 2007 | 51 | 8 | 29 | 41.305 | S | 0.500 | -0.383 |
| SNG7 | 2007 | 51 | 8 | 29 | 37.939 | S | 0.500 | -2.110 |
| SN75 | 2007 | 51 | 8 | 29 | 48.128 | S | 0.500 | 1.090  |
| R05C | 2007 | 51 | 8 | 29 | 45.818 | S | 0.500 | 0.898  |
| SNB9 | 2007 | 51 | 8 | 29 | 46.077 | S | 0.500 | 0.439  |
| SNB6 | 2007 | 51 | 8 | 29 | 44.721 | S | 0.500 | 0.510  |
| J09A | 2007 | 51 | 8 | 29 | 47.875 | S | 0.500 | 1.125  |
| SNC7 | 2007 | 51 | 8 | 29 | 42.932 | S | 0.500 | -0.390 |
| WVOR | 2007 | 51 | 8 | 29 | 45.916 | S | 0.500 | 0.946  |
| LAVA | 2007 | 51 | 8 | 29 | 42.117 | S | 0.500 | -0.240 |
| WCN  | 2007 | 51 | 8 | 29 | 45.697 | S | 0.500 | 0.521  |
| ELFS | 2007 | 51 | 8 | 29 | 40.082 | S | 0.500 | -0.524 |
| SNB3 | 2007 | 51 | 8 | 29 | 41.889 | S | 0.500 | 0.189  |
| SNC6 | 2007 | 51 | 8 | 29 | 42.864 | S | 0.500 | -0.439 |
| SNC5 | 2007 | 51 | 8 | 29 | 41.096 | S | 0.500 | -0.932 |
| SNE4 | 2007 | 51 | 8 | 29 | 38.856 | S | 0.500 | -0.723 |

|      |      |    |   |    |        |   |       |        |
|------|------|----|---|----|--------|---|-------|--------|
| SNA7 | 2007 | 51 | 8 | 29 | 45.531 | S | 0.500 | 0.353  |
| SNA4 | 2007 | 51 | 8 | 29 | 43.787 | S | 0.500 | 0.525  |
| SND5 | 2007 | 51 | 8 | 29 | 39.601 | S | 0.500 | -1.663 |
| K08A | 2007 | 51 | 8 | 29 | 46.512 | S | 0.500 | 1.368  |
| SN85 | 2007 | 51 | 8 | 29 | 47.035 | S | 0.500 | 1.315  |
| SNE5 | 2007 | 51 | 8 | 29 | 38.559 | S | 0.500 | -1.955 |
| SNE6 | 2007 | 51 | 8 | 29 | 40.089 | S | 0.500 | -1.521 |
| Q04C | 2007 | 51 | 8 | 29 | 39.701 | S | 0.500 | -0.176 |
| O06A | 2007 | 51 | 8 | 29 | 43.318 | S | 0.500 | -0.662 |
| SND7 | 2007 | 51 | 8 | 29 | 41.758 | S | 0.500 | -0.442 |
| SN93 | 2007 | 51 | 8 | 29 | 43.759 | S | 0.500 | 0.579  |
| SNA3 | 2007 | 51 | 8 | 29 | 43.439 | S | 0.500 | 0.782  |
| S05C | 2007 | 51 | 8 | 29 | 44.957 | S | 0.500 | -0.016 |
| S06C | 2007 | 51 | 8 | 29 | 46.938 | S | 0.500 | 0.537  |
| CMB  | 2007 | 51 | 8 | 29 | 44.988 | S | 0.500 | 0.905  |
| R04C | 2007 | 51 | 8 | 29 | 42.120 | S | 0.500 | 0.198  |
| SN74 | 2007 | 51 | 8 | 29 | 46.315 | S | 0.500 | 0.285  |
| SN96 | 2007 | 51 | 8 | 29 | 45.859 | S | 0.500 | 0.429  |
| HEC  | 2007 | 51 | 8 | 30 | 1.600  | S | 0.500 | 1.068  |

|      |     |    |    |         |          |           |         |    |        |
|------|-----|----|----|---------|----------|-----------|---------|----|--------|
| 2007 | 203 | 10 | 49 | 51.2294 | -2.79700 | 141.66000 | 10.0000 | 45 | 15.919 |
|------|-----|----|----|---------|----------|-----------|---------|----|--------|

|      |      |     |    |    |        |   |       |        |
|------|------|-----|----|----|--------|---|-------|--------|
| SND8 | 2007 | 203 | 11 | 14 | 5.400  | S | 0.500 | -0.504 |
| HUMO | 2007 | 203 | 11 | 13 | 54.354 | S | 0.500 | -0.027 |
| SDD  | 2007 | 203 | 11 | 14 | 18.165 | S | 0.500 | 0.341  |
| MWC  | 2007 | 203 | 11 | 14 | 15.453 | S | 0.500 | -1.179 |
| YO05 | 2007 | 203 | 11 | 14 | 8.105  | S | 0.500 | -0.943 |
| V03C | 2007 | 203 | 11 | 14 | 1.265  | S | 0.500 | -1.187 |
| Q07A | 2007 | 203 | 11 | 14 | 12.183 | S | 0.500 | 0.544  |
| L04A | 2007 | 203 | 11 | 13 | 58.213 | S | 0.500 | -0.434 |
| M10A | 2007 | 203 | 11 | 14 | 19.021 | S | 0.500 | -0.077 |
| O10A | 2007 | 203 | 11 | 14 | 19.907 | S | 0.500 | 0.115  |
| BBR  | 2007 | 203 | 11 | 14 | 21.664 | S | 0.500 | 0.338  |
| SNG7 | 2007 | 203 | 11 | 14 | 0.063  | S | 0.500 | -2.261 |
| SNF8 | 2007 | 203 | 11 | 14 | 3.574  | S | 0.500 | -0.909 |
| CVS  | 2007 | 203 | 11 | 13 | 52.297 | S | 0.500 | -4.836 |
| SNB6 | 2007 | 203 | 11 | 14 | 6.842  | S | 0.500 | 0.599  |
| I09A | 2007 | 203 | 11 | 14 | 13.440 | S | 0.500 | 0.002  |
| L10A | 2007 | 203 | 11 | 14 | 18.793 | S | 0.500 | -0.391 |
| R08A | 2007 | 203 | 11 | 14 | 15.852 | S | 0.500 | 1.263  |
| I08A | 2007 | 203 | 11 | 14 | 10.757 | S | 0.500 | 0.162  |
| Q08A | 2007 | 203 | 11 | 14 | 15.836 | S | 0.500 | 0.498  |
| WCN  | 2007 | 203 | 11 | 14 | 9.316  | S | 0.500 | 1.410  |
| K09A | 2007 | 203 | 11 | 14 | 14.626 | S | 0.500 | 0.414  |
| SHO  | 2007 | 203 | 11 | 14 | 24.232 | S | 0.500 | 1.560  |
| DGR  | 2007 | 203 | 11 | 14 | 20.720 | S | 0.500 | 0.135  |
| K08A | 2007 | 203 | 11 | 14 | 11.893 | S | 0.500 | 0.573  |
| O04C | 2007 | 203 | 11 | 14 | 1.805  | S | 0.500 | -0.568 |
| SN87 | 2007 | 203 | 11 | 14 | 10.427 | S | 0.500 | 1.428  |
| SND9 | 2007 | 203 | 11 | 14 | 6.291  | S | 0.500 | -0.596 |
| YO02 | 2007 | 203 | 11 | 14 | 8.150  | S | 0.500 | -0.378 |
| YO01 | 2007 | 203 | 11 | 14 | 7.955  | S | 0.500 | -0.462 |
| K10A | 2007 | 203 | 11 | 14 | 17.614 | S | 0.500 | 0.361  |
| R09A | 2007 | 203 | 11 | 14 | 20.265 | S | 0.500 | 1.383  |
| YO03 | 2007 | 203 | 11 | 14 | 8.348  | S | 0.500 | -0.221 |
| SNC7 | 2007 | 203 | 11 | 14 | 5.946  | S | 0.500 | 0.363  |
| ELFS | 2007 | 203 | 11 | 14 | 3.932  | S | 0.500 | 0.306  |
| U10A | 2007 | 203 | 11 | 14 | 24.609 | S | 0.500 | 2.502  |
| SN98 | 2007 | 203 | 11 | 14 | 10.270 | S | 0.500 | 0.980  |
| SNE6 | 2007 | 203 | 11 | 14 | 2.197  | S | 0.500 | -1.512 |
| J10A | 2007 | 203 | 11 | 14 | 17.106 | S | 0.500 | -0.019 |
| SNE4 | 2007 | 203 | 11 | 14 | 0.406  | S | 0.500 | -0.726 |
| K06A | 2007 | 203 | 11 | 14 | 4.390  | S | 0.500 | -0.325 |
| YO04 | 2007 | 203 | 11 | 14 | 8.527  | S | 0.500 | -0.388 |

|      |      |     |    |    |        |   |       |        |
|------|------|-----|----|----|--------|---|-------|--------|
| MPM  | 2007 | 203 | 11 | 14 | 19.580 | S | 0.500 | 1.468  |
| YO08 | 2007 | 203 | 11 | 14 | 10.187 | S | 0.500 | 0.523  |
| SNE9 | 2007 | 203 | 11 | 14 | 5.443  | S | 0.500 | -0.802 |
| SN96 | 2007 | 203 | 11 | 14 | 7.982  | S | 0.500 | 0.605  |
| LAVA | 2007 | 203 | 11 | 14 | 3.588  | S | 0.500 | -0.376 |
| ORV  | 2007 | 203 | 11 | 13 | 59.328 | S | 0.500 | -1.496 |
| YO07 | 2007 | 203 | 11 | 14 | 9.897  | S | 0.500 | 0.604  |
| R07C | 2007 | 203 | 11 | 14 | 13.673 | S | 0.500 | 2.211  |
| YO09 | 2007 | 203 | 11 | 14 | 10.462 | S | 0.500 | 0.682  |
| SN64 | 2007 | 203 | 11 | 14 | 9.467  | S | 0.500 | 0.330  |
| I06A | 2007 | 203 | 11 | 14 | 3.927  | S | 0.500 | -0.525 |
| YO06 | 2007 | 203 | 11 | 14 | 9.700  | S | 0.500 | 0.477  |
| SND5 | 2007 | 203 | 11 | 14 | 1.423  | S | 0.500 | -1.676 |
| YO10 | 2007 | 203 | 11 | 14 | 10.641 | S | 0.500 | 0.714  |
| SNA4 | 2007 | 203 | 11 | 14 | 5.164  | S | 0.500 | 0.313  |
| SNC6 | 2007 | 203 | 11 | 14 | 5.196  | S | 0.500 | -0.152 |
| YO11 | 2007 | 203 | 11 | 14 | 11.779 | S | 0.500 | 1.741  |
| SNB3 | 2007 | 203 | 11 | 14 | 2.574  | S | 0.500 | -0.476 |
| SNA3 | 2007 | 203 | 11 | 14 | 3.995  | S | 0.500 | -0.044 |
| SNC5 | 2007 | 203 | 11 | 14 | 2.419  | S | 0.500 | -1.454 |

|      |      |     |    |         |         |           |         |        |        |
|------|------|-----|----|---------|---------|-----------|---------|--------|--------|
| 2007 | 207  | 5   | 40 | 33.7471 | 2.87200 | 127.46400 | 25.0000 | 46     | 17.647 |
| SNG5 | 2007 | 207 | 6  | 5       | 10.947  | S         | 0.500   | -2.646 |        |
| WDC  | 2007 | 207 | 6  | 5       | 7.372   | S         | 0.500   | -1.592 |        |
| CHF  | 2007 | 207 | 6  | 5       | 33.121  | S         | 0.500   | 1.419  |        |
| HUMO | 2007 | 207 | 6  | 5       | 4.664   | S         | 0.500   | -0.551 |        |
| SMM  | 2007 | 207 | 6  | 5       | 24.266  | S         | 0.500   | 0.620  |        |
| MNRC | 2007 | 207 | 6  | 5       | 10.347  | S         | 0.500   | -1.514 |        |
| DGR  | 2007 | 207 | 6  | 5       | 38.018  | S         | 0.500   | 2.351  |        |
| M03C | 2007 | 207 | 6  | 5       | 7.815   | S         | 0.500   | -2.071 |        |
| S10A | 2007 | 207 | 6  | 5       | 33.962  | S         | 0.500   | 2.079  |        |
| Q09A | 2007 | 207 | 6  | 5       | 29.735  | S         | 0.500   | 1.150  |        |
| GASB | 2007 | 207 | 6  | 5       | 9.560   | S         | 0.500   | -0.393 |        |
| K06A | 2007 | 207 | 6  | 5       | 13.020  | S         | 0.500   | -0.887 |        |
| MUR  | 2007 | 207 | 6  | 5       | 37.109  | S         | 0.500   | 2.009  |        |
| HATC | 2007 | 207 | 6  | 5       | 11.118  | S         | 0.500   | -1.541 |        |
| L05A | 2007 | 207 | 6  | 5       | 12.266  | S         | 0.500   | -1.064 |        |
| HELL | 2007 | 207 | 6  | 5       | 25.636  | S         | 0.500   | 0.230  |        |
| O09A | 2007 | 207 | 6  | 5       | 27.978  | S         | 0.500   | 1.468  |        |
| BMN  | 2007 | 207 | 6  | 5       | 25.356  | S         | 0.500   | -0.976 |        |
| S09A | 2007 | 207 | 6  | 5       | 32.770  | S         | 0.500   | 2.679  |        |
| P09A | 2007 | 207 | 6  | 5       | 28.563  | S         | 0.500   | 0.685  |        |
| LGU  | 2007 | 207 | 6  | 5       | 29.261  | S         | 0.500   | 0.879  |        |
| P08A | 2007 | 207 | 6  | 5       | 25.227  | S         | 0.500   | 0.631  |        |
| L10A | 2007 | 207 | 6  | 5       | 27.394  | S         | 0.500   | 1.073  |        |
| J05A | 2007 | 207 | 6  | 5       | 9.485   | S         | 0.500   | -0.558 |        |
| N08A | 2007 | 207 | 6  | 5       | 24.137  | S         | 0.500   | 1.219  |        |
| BDM  | 2007 | 207 | 6  | 5       | 12.716  | S         | 0.500   | -1.911 |        |
| ISA  | 2007 | 207 | 6  | 5       | 29.860  | S         | 0.500   | 1.545  |        |
| L02A | 2007 | 207 | 6  | 5       | 3.852   | S         | 0.500   | 0.249  |        |
| HOPS | 2007 | 207 | 6  | 5       | 7.716   | S         | 0.500   | -1.630 |        |
| SNG7 | 2007 | 207 | 6  | 5       | 12.995  | S         | 0.500   | -1.921 |        |
| BEK  | 2007 | 207 | 6  | 5       | 16.720  | S         | 0.500   | -1.214 |        |
| I03A | 2007 | 207 | 6  | 5       | 1.393   | S         | 0.500   | -0.809 |        |
| I04A | 2007 | 207 | 6  | 5       | 3.578   | S         | 0.500   | -1.755 |        |
| SNF8 | 2007 | 207 | 6  | 5       | 15.145  | S         | 0.500   | -1.614 |        |
| M02C | 2007 | 207 | 6  | 5       | 6.795   | S         | 0.500   | -0.226 |        |
| M09A | 2007 | 207 | 6  | 5       | 25.260  | S         | 0.500   | 1.033  |        |
| V03C | 2007 | 207 | 6  | 5       | 18.067  | S         | 0.500   | -0.163 |        |
| Q08A | 2007 | 207 | 6  | 5       | 28.149  | S         | 0.500   | 1.742  |        |
| SNF6 | 2007 | 207 | 6  | 5       | 13.265  | S         | 0.500   | -2.172 |        |
| SNE7 | 2007 | 207 | 6  | 5       | 15.223  | S         | 0.500   | -1.266 |        |
| ORV  | 2007 | 207 | 6  | 5       | 11.545  | S         | 0.500   | -2.664 |        |

|      |      |     |   |   |        |   |       |        |
|------|------|-----|---|---|--------|---|-------|--------|
| SNE4 | 2007 | 207 | 6 | 5 | 12.816 | S | 0.500 | -1.860 |
| BNLO | 2007 | 207 | 6 | 5 | 11.823 | S | 0.500 | -2.843 |
| O02C | 2007 | 207 | 6 | 5 | 8.674  | S | 0.500 | -0.353 |
| Q07A | 2007 | 207 | 6 | 5 | 24.804 | S | 0.500 | 1.742  |
| YO07 | 2007 | 207 | 6 | 5 | 23.925 | S | 0.500 | 1.549  |
| SLA  | 2007 | 207 | 6 | 5 | 34.764 | S | 0.500 | 2.436  |
| J04A | 2007 | 207 | 6 | 5 | 5.950  | S | 0.500 | -1.601 |
| YO06 | 2007 | 207 | 6 | 5 | 23.662 | S | 0.500 | 1.342  |
| O08A | 2007 | 207 | 6 | 5 | 24.559 | S | 0.500 | 0.979  |
| SNE9 | 2007 | 207 | 6 | 5 | 16.431 | S | 0.500 | -1.085 |
| Q04C | 2007 | 207 | 6 | 5 | 13.461 | S | 0.500 | -1.635 |
| SN64 | 2007 | 207 | 6 | 5 | 23.386 | S | 0.500 | 1.135  |
| SND4 | 2007 | 207 | 6 | 5 | 14.316 | S | 0.500 | -1.556 |
| YO08 | 2007 | 207 | 6 | 5 | 24.151 | S | 0.500 | 1.429  |
| SND9 | 2007 | 207 | 6 | 5 | 17.831 | S | 0.500 | -0.432 |
| L04A | 2007 | 207 | 6 | 5 | 7.922  | S | 0.500 | -1.426 |
| K02A | 2007 | 207 | 6 | 5 | 2.670  | S | 0.500 | -0.401 |
| O05C | 2007 | 207 | 6 | 5 | 14.687 | S | 0.500 | -0.620 |
| YO09 | 2007 | 207 | 6 | 5 | 24.539 | S | 0.500 | 1.735  |
| SNE5 | 2007 | 207 | 6 | 5 | 12.754 | S | 0.500 | -2.847 |
| YO05 | 2007 | 207 | 6 | 5 | 22.627 | S | 0.500 | 0.433  |
| YO10 | 2007 | 207 | 6 | 5 | 23.840 | S | 0.500 | 0.931  |
| R06C | 2007 | 207 | 6 | 5 | 24.089 | S | 0.500 | 2.332  |
| N07B | 2007 | 207 | 6 | 5 | 20.320 | S | 0.500 | 0.108  |
| WVOR | 2007 | 207 | 6 | 5 | 19.746 | S | 0.500 | 0.933  |
| V04C | 2007 | 207 | 6 | 5 | 20.150 | S | 0.500 | 0.125  |
| YO04 | 2007 | 207 | 6 | 5 | 22.781 | S | 0.500 | 0.698  |
| J10A | 2007 | 207 | 6 | 5 | 23.846 | S | 0.500 | 0.760  |
| SND8 | 2007 | 207 | 6 | 5 | 17.550 | S | 0.500 | -0.092 |
| L07A | 2007 | 207 | 6 | 5 | 17.967 | S | 0.500 | 0.421  |
| SNB3 | 2007 | 207 | 6 | 5 | 16.370 | S | 0.500 | -0.667 |
| YO03 | 2007 | 207 | 6 | 5 | 22.597 | S | 0.500 | 0.842  |
| HAST | 2007 | 207 | 6 | 5 | 15.978 | S | 0.500 | -0.895 |
| YO02 | 2007 | 207 | 6 | 5 | 22.431 | S | 0.500 | 0.700  |
| SNB9 | 2007 | 207 | 6 | 5 | 20.475 | S | 0.500 | 0.319  |
| N06A | 2007 | 207 | 6 | 5 | 17.372 | S | 0.500 | -0.104 |
| SN63 | 2007 | 207 | 6 | 5 | 22.032 | S | 0.500 | 0.344  |
| YO01 | 2007 | 207 | 6 | 5 | 22.175 | S | 0.500 | 0.447  |
| SND5 | 2007 | 207 | 6 | 5 | 14.275 | S | 0.500 | -2.141 |
| SN55 | 2007 | 207 | 6 | 5 | 26.016 | S | 0.500 | 2.761  |
| YO11 | 2007 | 207 | 6 | 5 | 25.329 | S | 0.500 | 2.421  |
| SNC5 | 2007 | 207 | 6 | 5 | 15.586 | S | 0.500 | -1.661 |
| SN93 | 2007 | 207 | 6 | 5 | 18.795 | S | 0.500 | 0.934  |
| SNA3 | 2007 | 207 | 6 | 5 | 18.303 | S | 0.500 | 1.017  |
| O07A | 2007 | 207 | 6 | 5 | 21.723 | S | 0.500 | 0.362  |
| SNA7 | 2007 | 207 | 6 | 5 | 20.583 | S | 0.500 | 0.839  |
| O06A | 2007 | 207 | 6 | 5 | 17.979 | S | 0.500 | -0.270 |
| SNB7 | 2007 | 207 | 6 | 5 | 18.811 | S | 0.500 | -0.065 |
| SNA4 | 2007 | 207 | 6 | 5 | 18.640 | S | 0.500 | 0.756  |
| L08A | 2007 | 207 | 6 | 5 | 21.311 | S | 0.500 | 1.166  |
| SND7 | 2007 | 207 | 6 | 5 | 15.915 | S | 0.500 | -1.362 |
| LAVA | 2007 | 207 | 6 | 5 | 16.879 | S | 0.500 | -0.011 |
| SNC7 | 2007 | 207 | 6 | 5 | 17.143 | S | 0.500 | -0.609 |
| CMB  | 2007 | 207 | 6 | 5 | 20.232 | S | 0.500 | 1.385  |
| SNC6 | 2007 | 207 | 6 | 5 | 17.274 | S | 0.500 | -0.503 |
| R05C | 2007 | 207 | 6 | 5 | 20.427 | S | 0.500 | 0.879  |
| SNB6 | 2007 | 207 | 6 | 5 | 18.859 | S | 0.500 | 0.093  |
| SNE6 | 2007 | 207 | 6 | 5 | 14.800 | S | 0.500 | -1.899 |
| SN96 | 2007 | 207 | 6 | 5 | 20.781 | S | 0.500 | 0.659  |

|      |      |     |    |         |         |           |        |        |
|------|------|-----|----|---------|---------|-----------|--------|--------|
| 2007 | 232  | 13  | 46 | 35.2218 | 6.13400 | 127.38100 | 8.0000 |        |
| SN93 | 2007 | 232 | 14 | 11      | 15.616  | S         | 0.500  | 0.089  |
| MPP  | 2007 | 232 | 14 | 11      | 23.190  | S         | 0.500  | -0.465 |

|      |      |     |    |    |        |   |       |        |
|------|------|-----|----|----|--------|---|-------|--------|
| BDM  | 2007 | 232 | 14 | 11 | 10.737 | S | 0.500 | -0.684 |
| V03C | 2007 | 232 | 14 | 11 | 16.420 | S | 0.500 | -0.049 |
| SUTB | 2007 | 232 | 14 | 11 | 7.888  | S | 0.500 | -2.013 |
| JRSC | 2007 | 232 | 14 | 11 | 9.049  | S | 0.500 | -1.907 |
| VTV  | 2007 | 232 | 14 | 11 | 32.940 | S | 0.500 | 1.486  |
| M04C | 2007 | 232 | 14 | 11 | 4.173  | S | 0.500 | -1.762 |
| WENL | 2007 | 232 | 14 | 11 | 11.605 | S | 0.500 | -0.758 |
| VCS  | 2007 | 232 | 14 | 11 | 30.572 | S | 0.500 | 1.557  |
| ADO  | 2007 | 232 | 14 | 11 | 32.252 | S | 0.500 | 0.860  |
| PACP | 2007 | 232 | 14 | 11 | 14.965 | S | 0.500 | -0.172 |
| MNRC | 2007 | 232 | 14 | 11 | 7.289  | S | 0.500 | -1.099 |
| CVS  | 2007 | 232 | 14 | 11 | 6.258  | S | 0.500 | -2.685 |
| HATC | 2007 | 232 | 14 | 11 | 6.809  | S | 0.500 | -1.967 |
| TPH  | 2007 | 232 | 14 | 11 | 27.584 | S | 0.500 | 0.748  |
| GASB | 2007 | 232 | 14 | 11 | 5.184  | S | 0.500 | -1.071 |
| R10A | 2007 | 232 | 14 | 11 | 29.873 | S | 0.500 | 0.337  |
| P10A | 2007 | 232 | 14 | 11 | 26.498 | S | 0.500 | -0.338 |
| SNF8 | 2007 | 232 | 14 | 11 | 11.354 | S | 0.500 | -1.787 |
| ARV  | 2007 | 232 | 14 | 11 | 27.121 | S | 0.500 | 1.797  |
| LAVA | 2007 | 232 | 14 | 11 | 13.740 | S | 0.500 | -0.636 |
| U11A | 2007 | 232 | 14 | 11 | 37.910 | S | 0.500 | 2.901  |
| YBH  | 2007 | 232 | 14 | 11 | 2.157  | S | 0.500 | -0.711 |
| YO01 | 2007 | 232 | 14 | 11 | 19.156 | S | 0.500 | -0.417 |
| SNF6 | 2007 | 232 | 14 | 11 | 9.768  | S | 0.500 | -2.089 |
| BFS  | 2007 | 232 | 14 | 11 | 32.704 | S | 0.500 | 1.717  |
| HELL | 2007 | 232 | 14 | 11 | 22.786 | S | 0.500 | -0.827 |
| SVD  | 2007 | 232 | 14 | 11 | 35.252 | S | 0.500 | 2.165  |
| Q10A | 2007 | 232 | 14 | 11 | 28.626 | S | 0.500 | 0.463  |
| V11A | 2007 | 232 | 14 | 11 | 39.544 | S | 0.500 | 3.502  |
| L07A | 2007 | 232 | 14 | 11 | 14.287 | S | 0.500 | 0.069  |
| CHF  | 2007 | 232 | 14 | 11 | 30.859 | S | 0.500 | 1.218  |
| SNE5 | 2007 | 232 | 14 | 11 | 9.825  | S | 0.500 | -2.275 |
| RRX  | 2007 | 232 | 14 | 11 | 34.384 | S | 0.500 | 2.410  |
| SBC  | 2007 | 232 | 14 | 11 | 24.281 | S | 0.500 | 0.834  |
| V04C | 2007 | 232 | 14 | 11 | 18.375 | S | 0.500 | -0.013 |
| YO02 | 2007 | 232 | 14 | 11 | 19.410 | S | 0.500 | -0.149 |
| HEC  | 2007 | 232 | 14 | 11 | 37.060 | S | 0.500 | 2.524  |
| YO04 | 2007 | 232 | 14 | 11 | 19.652 | S | 0.500 | -0.258 |
| YO03 | 2007 | 232 | 14 | 11 | 19.523 | S | 0.500 | -0.061 |
| PASC | 2007 | 232 | 14 | 11 | 30.450 | S | 0.500 | 1.424  |
| SNE4 | 2007 | 232 | 14 | 11 | 9.659  | S | 0.500 | -1.526 |
| P06A | 2007 | 232 | 14 | 11 | 14.991 | S | 0.500 | -0.858 |
| SNG5 | 2007 | 232 | 14 | 11 | 7.455  | S | 0.500 | -2.515 |
| YO06 | 2007 | 232 | 14 | 11 | 20.282 | S | 0.500 | 0.133  |
| P09A | 2007 | 232 | 14 | 11 | 24.448 | S | 0.500 | -0.190 |
| SND8 | 2007 | 232 | 14 | 11 | 13.081 | S | 0.500 | -1.832 |
| SNE9 | 2007 | 232 | 14 | 11 | 13.272 | S | 0.500 | -1.399 |
| SND7 | 2007 | 232 | 14 | 11 | 12.174 | S | 0.500 | -1.586 |
| SLA  | 2007 | 232 | 14 | 11 | 31.171 | S | 0.500 | 1.239  |
| YO10 | 2007 | 232 | 14 | 11 | 20.622 | S | 0.500 | -0.137 |
| SNB3 | 2007 | 232 | 14 | 11 | 13.009 | S | 0.500 | -0.746 |
| SNC5 | 2007 | 232 | 14 | 11 | 12.228 | S | 0.500 | -1.630 |
| SND4 | 2007 | 232 | 14 | 11 | 11.273 | S | 0.500 | -1.180 |
| WCN  | 2007 | 232 | 14 | 11 | 16.787 | S | 0.500 | -0.304 |
| SNC7 | 2007 | 232 | 14 | 11 | 13.843 | S | 0.500 | -1.263 |
| SN64 | 2007 | 232 | 14 | 11 | 20.300 | S | 0.500 | 0.225  |
| P05C | 2007 | 232 | 14 | 11 | 12.710 | S | 0.500 | -1.470 |
| DEC  | 2007 | 232 | 14 | 11 | 29.568 | S | 0.500 | 1.069  |
| ISA  | 2007 | 232 | 14 | 11 | 26.846 | S | 0.500 | 0.946  |
| TIN  | 2007 | 232 | 14 | 11 | 26.251 | S | 0.500 | 1.249  |
| HAST | 2007 | 232 | 14 | 11 | 14.415 | S | 0.500 | -0.575 |
| S08C | 2007 | 232 | 14 | 11 | 27.207 | S | 0.500 | 2.401  |
| CMB  | 2007 | 232 | 14 | 11 | 16.849 | S | 0.500 | 0.285  |

|      |      |     |    |    |        |   |       |        |
|------|------|-----|----|----|--------|---|-------|--------|
| ORV  | 2007 | 232 | 14 | 11 | 8.246  | S | 0.500 | -2.395 |
| S10A | 2007 | 232 | 14 | 11 | 30.024 | S | 0.500 | 0.964  |
| O09A | 2007 | 232 | 14 | 11 | 23.659 | S | 0.500 | 0.554  |
| SN98 | 2007 | 232 | 14 | 11 | 18.806 | S | 0.500 | 0.083  |
| Q09A | 2007 | 232 | 14 | 11 | 26.289 | S | 0.500 | 0.795  |
| SNC6 | 2007 | 232 | 14 | 11 | 13.824 | S | 0.500 | -1.364 |
| YO07 | 2007 | 232 | 14 | 11 | 20.607 | S | 0.500 | 0.392  |
| DJJ  | 2007 | 232 | 14 | 11 | 29.315 | S | 0.500 | 1.204  |
| LGU  | 2007 | 232 | 14 | 11 | 26.738 | S | 0.500 | 0.430  |
| Q08A | 2007 | 232 | 14 | 11 | 23.794 | S | 0.500 | -0.279 |
| SND5 | 2007 | 232 | 14 | 11 | 11.212 | S | 0.500 | -1.773 |
| Q07A | 2007 | 232 | 14 | 11 | 20.767 | S | 0.500 | 0.128  |
| S06C | 2007 | 232 | 14 | 11 | 18.683 | S | 0.500 | -0.361 |
| SNA3 | 2007 | 232 | 14 | 11 | 15.008 | S | 0.500 | 0.126  |
| LRL  | 2007 | 232 | 14 | 11 | 30.762 | S | 0.500 | 1.716  |
| YO08 | 2007 | 232 | 14 | 11 | 20.686 | S | 0.500 | 0.118  |
| MPM  | 2007 | 232 | 14 | 11 | 30.426 | S | 0.500 | 1.383  |
| SHO  | 2007 | 232 | 14 | 11 | 35.695 | S | 0.500 | 2.719  |
| T06C | 2007 | 232 | 14 | 11 | 20.036 | S | 0.500 | -0.571 |
| YO09 | 2007 | 232 | 14 | 11 | 20.976 | S | 0.500 | 0.329  |
| SN96 | 2007 | 232 | 14 | 11 | 17.615 | S | 0.500 | -0.116 |
| R04C | 2007 | 232 | 14 | 11 | 13.807 | S | 0.500 | -0.329 |
| S09A | 2007 | 232 | 14 | 11 | 28.889 | S | 0.500 | 1.612  |
| SNA4 | 2007 | 232 | 14 | 11 | 15.530 | S | 0.500 | 0.068  |
| FMP  | 2007 | 232 | 14 | 11 | 31.495 | S | 0.500 | 2.322  |
